# Supplementary material for: Persons diagnosed with COVID-19 in England in the Clinical Practice Research Datalink (CPRD): a cohort description
Source: PubMed Central journal article supplement — BMJ Open. 2024 Jan 12;14(1):e073866. doi: 10.1136/bmjopen-2023-073866 (PMC10806788; doi:10.1136/bmjopen-2023-073866), 2024-01-12
Supplement: bmjopen-2023-073866.draft_revisions.pdf [file bmjopen-2023-073866.draft_revisions.pdf]

# BMJ Open

BMJ Open is committed to open peer review. As part of this commitment we make the peer review history of every article we publish publicly available.

When an article is published we post the peer reviewers' comments and the authors' responses online. We also post the versions of the paper that were used during peer review. These are the versions that the peer review comments apply to.

The versions of the paper that follow are the versions that were submitted during the peer review process. They are not the versions of record or the final published versions. They should not be cited or distributed as the published version of this manuscript.

BMJ Open is an open access journal and the full, final, typeset and author-corrected version of record of the manuscript is available on our site with no access controls, subscription charges or pay-per-view fees (<http://bmjopen.bmj.com>).

If you have any questions on BMJ Open's open peer review process please email [info.bmjopen@bmj.com](mailto:info.bmjopen@bmj.com)

# BMJ Open

## Persons Diagnosed with COVID in England in the Clinical Practice Research Datalink (CPRD): A Cohort Description

|                               |                                                                                                                                                                                                                                                                                                                                                                                                     |
|-------------------------------|-----------------------------------------------------------------------------------------------------------------------------------------------------------------------------------------------------------------------------------------------------------------------------------------------------------------------------------------------------------------------------------------------------|
| Journal:                      | <i>BMJ Open</i>                                                                                                                                                                                                                                                                                                                                                                                     |
| Manuscript ID                 | bmjopen-2023-073866                                                                                                                                                                                                                                                                                                                                                                                 |
| Article Type:                 | Original research                                                                                                                                                                                                                                                                                                                                                                                   |
| Date Submitted by the Author: | 22-Mar-2023                                                                                                                                                                                                                                                                                                                                                                                         |
| Complete List of Authors:     | Andersen, Kathleen; Pfizer Inc<br>McGrath, Leah; Pfizer Inc<br>Reimbaeva, Maya; Pfizer Inc<br>Mendes, Diana; Pfizer Ltd<br>Nguyen, Jennifer; Pfizer Inc<br>Rai, Kiran; Adelphi Real World<br>Tritton, Theo; Adelphi Real World<br>Tsang, Carmen; Pfizer Ltd<br>Malhotra, Deepa; Pfizer Inc<br>Yang, Jingyan; Pfizer Inc; Columbia University, Institute for Social and Economic Research and Policy |
| Keywords:                     | COVID-19, Primary Health Care, Epidemiology < TROPICAL MEDICINE                                                                                                                                                                                                                                                                                                                                     |
|                               |                                                                                                                                                                                                                                                                                                                                                                                                     |

SCHOLARONE™  
Manuscripts

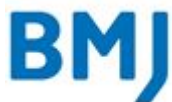

I, the Submitting Author has the right to grant and does grant on behalf of all authors of the Work (as defined in the below author licence), an exclusive licence and/or a non-exclusive licence for contributions from authors who are: i) UK Crown employees; ii) where BMJ has agreed a CC-BY licence shall apply, and/or iii) in accordance with the terms applicable for US Federal Government officers or employees acting as part of their official duties; on a worldwide, perpetual, irrevocable, royalty-free basis to BMJ Publishing Group Ltd ("BMJ") its licensees and where the relevant Journal is co-owned by BMJ to the co-owners of the Journal, to publish the Work in this journal and any other BMJ products and to exploit all rights, as set out in our [licence](#).

The Submitting Author accepts and understands that any supply made under these terms is made by BMJ to the Submitting Author unless you are acting as an employee on behalf of your employer or a postgraduate student of an affiliated institution which is paying any applicable article publishing charge ("APC") for Open Access articles. Where the Submitting Author wishes to make the Work available on an Open Access basis (and intends to pay the relevant APC), the terms of reuse of such Open Access shall be governed by a Creative Commons licence – details of these licences and which [Creative Commons](#) licence will apply to this Work are set out in our licence referred to above.

Other than as permitted in any relevant BMJ Author's Self Archiving Policies, I confirm this Work has not been accepted for publication elsewhere, is not being considered for publication elsewhere and does not duplicate material already published. I confirm all authors consent to publication of this Work and authorise the granting of this licence.

1  
2  
3 **PERSONS DIAGNOSED WITH COVID IN ENGLAND IN THE**  
4 **CLINICAL PRACTICE RESEARCH DATALINK (CPRD):**  
5 **A COHORT DESCRIPTION**  
6  
7  
8  
9

10 Kathleen M. Andersen, PhD MSc;<sup>1</sup> Leah J. McGrath, PhD;<sup>1</sup> Maya Reimbaeva, MS;<sup>1</sup>  
11 Diana Mendes, PhD;<sup>2</sup> Jennifer L. Nguyen, ScD MPH MHCI;<sup>1</sup>  
12 Kiran K. Rai, PhD;<sup>3</sup> Theo Tritton, MSc;<sup>3</sup> Carmen Tsang, PhD;<sup>2</sup>  
13 Deepa Malhotra, MS;<sup>1</sup> Jingyan Yang, DrPH MHS<sup>1,4</sup>  
14  
15  
16  
17

- 18 1. Pfizer Inc, New York, NY 10001
- 19 2. Pfizer Ltd, Tadworth, UK
- 20 3. Adelphi Real World, Bollington, UK
- 21 4. Institute for Social and Economic Research and Policy, Columbia University,  
22 New York, NY 10027  
23  
24  
25  
26  
27

28  
29 **Corresponding Author:**

30 Kathleen M. Andersen, PhD  
31 Senior Manager, Vaccines Real World Evidence  
32 Pfizer Inc.  
33 New York, NY  
34 Phone: 443-540-9961  
35 Email: [kathleen.andersen@pfizer.com](mailto:kathleen.andersen@pfizer.com)  
36  
37  
38  
39  
40  
41  
42

43 Length: text 4,016; tables and figures 5  
44  
45  
46  
47  
48  
49  
50  
51  
52  
53  
54  
55  
56  
57  
58  
59  
60



**ABSTRACT (347/400 words)**

**Objective:** To create case definitions for confirmed COVID diagnoses, COVID vaccination status, and three separate definitions of high risk of severe COVID, as well as to assess whether the implementation of these definitions in a cohort reflected the sociodemographic and clinical characteristics of COVID epidemiology in England.

**Design:** Retrospective cohort study

**Setting:** Electronic healthcare records from primary care (Clinical Practice Research Datalink, or CPRD) linked to secondary care data (Hospital Episode Statistics, or HES) data covering 24% of the population in England

**Participants:** 2,271,072 persons aged 1 year and older diagnosed with COVID in CPRD Aurum between August 1, 2020 through January 31, 2022.

**Main Outcome Measures:** Age, sex, and regional distribution of COVID cases and COVID vaccine doses received prior to diagnosis were assessed separately for the cohorts of cases identified in primary care and those hospitalized for COVID (primary diagnosis code of ICD-10 U07.1 "COVID-19"). Smoking status, body mass index and Charlson Comorbidity Index were compared for the two cohorts, as well as for three separate definitions of high risk of severe disease used in the United Kingdom (NHS Highest Risk, PANORAMIC trial eligibility, UK Health Security Agency Clinical Risk prioritization for vaccination).

**Results:** Compared to national estimates, CPRD case estimates underrepresented older adults in both the primary care (age 65-84: 6% in CPRD vs 9% nationally) and hospitalized (31% vs 40%) cohorts, and overrepresented people living in regions with the highest median wealth areas of England (20% primary care and 20% hospital admitted cases in South East, vs 15% nationally). The majority of non-hospitalized cases and all hospitalized cases had not completed primary series vaccination. In primary care, persons meeting high risk definitions were older, more often smokers, overweight or obese, and had higher Charlson Comorbidity Index score.

**Conclusions:** CPRD primary care data is a robust real-world data source and can be used for some COVID research questions, however limitations of the data availability should be carefully considered. Included in this publication are supplemental files for a

total of over 28,000 codes to define each of three definitions of high risk of severe disease.

## SUMMARY BOXES

### Strengths of study methods

- To our knowledge, we offer the first publication of code lists for each of these high-risk definitions, which can now be readily used in datasets that contain CPRD medical and product, ICD-10 and OPCS Classification of Interventions and Procedures codes.
- Given the mandatory reporting of PCR tests, regardless of result, back to GP, the CPRD should have nearly complete capture of confirmed COVID cases in this pre-antigen test era.
- Similarly, COVID vaccines administered at any location in the country were also mandated to be reported to patient's GP.

### Limitations of study methods

- While the data in this publication represent the most recent sets available from CPRD as of 22 March 2023, the primary care data have not been released since May 2022 and the secondary care data have not been released since March 2021.
- The present study does not capture persons not under GP care, or COVID cases who presented directly to hospital without first having a recorded diagnosis with their general practitioner.

## INTRODUCTION

As of 3 February 2023, there have been over 20 million confirmed COVID cases and more than 183,000 related deaths in England.<sup>1</sup> COVID severity ranges from asymptomatic cases to severe disease requiring hospital admission and sometimes death, with older adults and people with chronic health conditions at disproportionate risk.<sup>2,3</sup> Therefore, electronic health records (EHR) with longstanding capture of patients' medical history are uniquely positioned to answer population-based questions related to healthcare resource utilization, economic impact, and pharmaceutical intervention associated with COVID.

The Clinical Practice Research Datalink (CPRD) is a longitudinal and anonymized EHR database of primary health care interactions in England.<sup>4</sup> Primary care is the cornerstone of healthcare in England, with over 98% of the population registered with a general practitioner (GP). From August 2020 through March 2022, the National Health Service (NHS) mandated that all polymerase chain reaction (PCR) tests for SARS-CoV-2, regardless of result, be reported to patients' GP.<sup>5</sup> Similarly, COVID vaccines administered at any location in the country were also mandated to be reported to patient's GP.<sup>6</sup> Thus, during this period, CPRD can be considered a closed network of confirmed COVID cases for persons in the network, with accurate information on COVID vaccination status.

While the CPRD has been used in over 3,000 peer-reviewed publications, it is not known whether interruptions in healthcare, particularly in-person primary care visits, during the first years of the coronavirus pandemic affected the previously described characteristics of the CPRD population. The objective of this study was to create case definitions for COVID diagnoses, COVID vaccination, and three separate definitions of high risk of severe COVID. Second, we aimed to evaluate these definitions in a cohort of persons with COVID in the CPRD to assess whether their sociodemographic and clinical characteristics reflected COVID epidemiology in England. The methodology developed in the study can be leveraged in future COVID research in CPRD data.

## METHODS

### Study Setting and Population

CPRD Aurum contains data which is routinely collected from primary care practices that use the EMIS Web® digital clinical system that includes electronic patient records.<sup>7</sup> The May 2022 release of CPRD Aurum contained data from approximately 24% of persons in England.<sup>8,9</sup> Data captured include age, sex, body weight, medical diagnoses, referrals to specialists and/or secondary care, prescriptions issued in primary care, laboratory tests, vaccinations administered, smoking and alcohol consumption status, and all other types of care delivered as part of routine primary care practice.

CPRD Aurum was linked to Hospital Episode Statistics Admitted Patient Care (HES APC) records, using deterministic patient-level linkage with an 8-stage algorithm carried out by NHS Digital. Over 99% of practices contributing to CPRD Aurum participate in HES linkage. The HES APC dataset includes patient demographics, date and method of hospital admission and discharge, diagnoses, specialty care, and procedures. HES APC data from April 1997 to March 2021 was available in this study.

### Inclusion and Exclusion Criteria

We included persons of any age diagnosed with COVID (described below) from 1 August 2020 through 31 January 2022. First, we required records to be of acceptable research quality, as defined by CPRD. Second, we required people to be continuously registered with their GP practice for at least 365 days prior to COVID diagnosis, to establish pre-COVID health history. Third, we required persons to be HES APC linkage eligible to ensure the exclusion of patients where confirmed hospital admission status (via HES APC, during the time period available) could not be known. Fourth, we excluded persons who were admitted to the hospital on or before their primary care recorded date of COVID diagnosis. Due to mandatory reporting guidelines, the GP's date of notification from the hospital may be delayed from the date of true test collection and therefore may not accurately reflect date of diagnosis. Lastly, we excluded persons with a registration end date, practice last collection date or death date that was prior to their COVID diagnosis.

## COVID Case Definition

With each monthly data release, CPRD publishes feasibility counts for SARS-CoV-2 related codes in CPRD primary care data with corresponding code lists.<sup>8,10</sup> The code types include vaccination, tests (including PCR, antibody and antigen tests), diagnosis, advice, possible cases, and post-COVID clinic referral codes. Three reviewers (KA, QM, AS) independently screened the CPRD code list to determine which of the codes represented a confirmed and current infection. Discrepancies were adjudicated by a fourth reviewer (LM), and the final definition for the COVID case definition was reviewed by UK and non-UK clinicians (**eTable 1**). We defined a current and confirmed COVID episode as a diagnosis code, positive PCR, or antigen test. We did not include COVID vaccination, antibody tests, possible cases, exposure to COVID or post-COVID clinic referral codes in the COVID case definition.

Hospitalizations for COVID were defined as persons admitted with a primary diagnosis of COVID (ICD-10 U07.1 “COVID-19”) within 12 weeks of the initial diagnosis recorded in primary care. Non-hospitalized COVID cases were defined as the subset of persons for whom secondary care data were available but had no record of hospital admission. Primary care COVID cases were defined as persons who were not admitted to the hospital within 12 weeks of diagnosis, and those after April 1, 2021 for which hospital admission data were not available.

## COVID Vaccination Definition

The first COVID vaccine dose in England was administered on 8 December 2020, with the initially limited supply prioritized for groups as outlined by the Joint Committee for Vaccinations and Immunisations (JCVI).<sup>11</sup> In England, COVID vaccines produced by Pfizer-BioNTech and Moderna have been available since December 2020. In April 2021, JCVI announced that persons who received a first dose of an AstraZeneca vaccine would receive a second dose of the same brand but persons who had not yet received a vaccine dose would be “preferentially offered an alternative”.<sup>12</sup> This study did not consider Novavax vaccinations, as it was approved for use after our index date, or

1  
2  
3 the Janssen or Valneva vaccines, which have not been used in England as of February  
4 2023.<sup>13</sup>  
5  
6  
7

8 In Phase 1 (December 2020 - March 2021), people aged 50 and older, as well as front-  
9 line health and social care workers, clinically extremely vulnerable persons and persons  
10 aged 16 and older with underlying health conditions were eligible to receive two doses.  
11 In Phase 2 (beginning April 2021), access broadened for persons aged 18-49 to receive  
12 two doses. Additionally, immunocompromised persons who received two doses in  
13 phase 1 were recommended to receive a third dose at least eight weeks after their  
14 second dose in order to complete their primary series. Phase 3 included a single dose  
15 for 16–17-year-olds in August 2021. In September 2021, 12–15-year-olds could receive  
16 a single dose and a booster dose for adults was recommended at least 6 months after  
17 the completion of a primary series. In November 2021, 12–17-year-olds could receive a  
18 second dose, and the recommendation for booster dose was shortened to at least 3  
19 months after the completion of a primary series.<sup>11</sup>  
20  
21  
22  
23  
24  
25  
26  
27  
28  
29

30 We used a combination of product codes, which specify brand and dose of vaccine, as  
31 well as medical codes which indicated administration of a non-specific COVID vaccine  
32 (**eTable 2**). The code lists were derived from the published set by CPRD.<sup>10</sup> While  
33 patients may have multiple vaccination codes in their record on a given day, such as a  
34 code to indicate both the administration as well as a separate code for the specific  
35 product given, persons were not counted as receiving as more than one vaccine dose  
36 per day.  
37  
38  
39  
40  
41  
42  
43

44 Vaccination status at COVID diagnosis date was reported, regardless of brand, and  
45 separately for immunocompromised versus non-immunocompromised persons.  
46 Persons were considered unvaccinated if there was no record of COVID vaccination, or  
47 for up to 13 days after first dose to account for time needed to build immunity following  
48 immunisation. Dose 1 was defined starting 14 days after the record of the first COVID  
49 vaccine administration until 13 days after the receipt of second dose, or until end of  
50 follow-up. Dose 2 was defined starting 14 days after the record of the second COVID  
51  
52  
53  
54  
55  
56  
57  
58  
59  
60

1  
2  
3 vaccine administration and administered at least 21 days after the first dose. Persons  
4 were considered to have had 2 doses until 13 days before their next vaccine. For non-  
5 immunocompromised persons, the primary vaccination series was complete 14 days  
6 after second dose. For immunocompromised persons only, dose 3 was part of their  
7 primary series at least 21 days after their second dose. First booster doses (winter  
8 2021) were defined 21 or more days after the receipt of the last dose in primary series.  
9 For all vaccination definitions, no upper limit on time between doses was applied.  
10  
11  
12  
13  
14  
15

### 16 17 **COVID Risk Status**

18 We considered three separate definitions of COVID risk status, each of which are set  
19 forth by different groups and capture non-intersecting populations. First, the NHS  
20 highest risk group, which was a list of conditions set forth by an advisory group  
21 commissioned by England's Deputy Chief Medical Officer to identify persons at the very  
22 highest risk of COVID hospital admission and death.<sup>14</sup> Second, eligibility for the  
23 PANORAMIC study, which began in December 2021 and is a platform randomized trial  
24 of antiviral therapeutic agents.<sup>15</sup> The persons who qualify for antiviral treatment in the  
25 trial are those at a higher risk of hospital admission and death. Third, UK Health  
26 Security Agency (UKHSA) clinical risk groups as outlined in "The Green Book" chapter  
27 14a, which is COVID vaccination prioritization from the JCVI.<sup>16</sup> For each of these three  
28 risk definitions, we operationalized the clinical conditions lists into SNOMED and ICD-10  
29 code lists. Where available, we used published code lists.<sup>17-23</sup> For concepts not found in  
30 the literature, we developed wildcard-based search terms in the CPRD code browser  
31 (**eTables 3-5**). At least one practicing clinician from the UK, who were independent and  
32 external to Pfizer, reviewed each of the search term strategies, as well as ensuing code  
33 lists.  
34  
35  
36  
37  
38  
39  
40  
41  
42  
43  
44  
45  
46  
47

### 48 **Comparison to Publicly Available Data**

49 We compared our results to estimates published on the UK Government's Coronavirus  
50 dashboard, and restricted results to those specific to England, as the CPRD Aurum  
51 population that is HES-linkage eligible contains data from England only.<sup>24,25</sup> The data in  
52 this manuscript reflect figures from the dashboard as accessed on 31 January 2023.  
53  
54  
55  
56  
57  
58  
59  
60



1  
2  
3 Where possible, we restricted the dashboard to cases from 1 August 2020 through 31  
4 January 2022 to reflect the study period, although age, sex and region-specific  
5 estimates were reported “since the start of the pandemic”.<sup>24,25</sup> For whole country (non-  
6 COVID related) comparisons, we used the Office of National Statistics’ 2021 Census.<sup>9</sup>  
7  
8  
9

## 10 11 12 **Statistical Analyses**

13 All results are presented separately for the cohorts of persons with primary care versus  
14 hospitalized COVID cases. Continuous variables are presented as means (standard  
15 deviations) or medians (interquartile ranges) and categorical variables as counts  
16 (percentages). Missing data for sex, region, smoking status and BMI is shown in tables.  
17 The absence of codes for comorbidities was assumed to be the absence of the  
18 comorbidity rather than missing data. Standardized mean differences (SMD) were used  
19 to compare groups, with SMD > 10% indicating significant difference. As per CPRD  
20 privacy rules, any cell with 10 persons or fewer (but not zero) was suppressed and other  
21 cells related to the small cell count were redacted to ensure no back-calculation could  
22 populate the count.  
23  
24  
25  
26  
27  
28  
29  
30  
31

32 This study is based in part on data from the Clinical Practice Research Datalink  
33 obtained under license from the UK Medicines and Healthcare products Regulatory  
34 Agency. The data is provided by patients and collected by the NHS as part of their care  
35 and support. Office for National Statistics (ONS) and Hospital Episode Statistics (HES)  
36 data, copyright © (2021), re-used with the permission of The Health & Social Care  
37 Information Center. All rights reserved. The interpretation and conclusions contained in  
38 this study are those of the authors alone. Data management and analyses for this study  
39 used SAS, version 9.4 (SAS Institute, Cary, North Carolina).  
40  
41  
42  
43  
44  
45  
46  
47

48 There were no directly involved patients or public involvement in this study.  
49  
50

## 51 52 **RESULTS**

53 From 1 August 2020 through 31 January 2022, the UK Government’s Coronavirus  
54 dashboard reported 14,744,991 COVID cases in England.<sup>24</sup> The final CPRD cohort  
55  
56  
57  
58  
59  
60



1  
2  
3 contained 2,271,072 persons diagnosed with COVID, regardless of care setting, in  
4 England in the same time period (**eTable 6**). The case trends followed national  
5 estimates, with a series of peaks and troughs with a large peak in winter 2021  
6 (**eFigures 1 and 2**). Hospital admissions increased in fall 2020 and winter 2020  
7 (**eFigure 3**).

8  
9  
10  
11  
12  
13 There were 2,257,907 persons with COVID cases observed in primary care, which  
14 included persons who were not hospitalized during the period of time for which hospital  
15 admission data was available (n=522,288) as well as all COVID diagnoses recorded in  
16 the period where hospital admission data ended (n=1,735,619). Separately, there were  
17 13,165 persons (2% of COVID cases from August 2020 to March 2021) who were  
18 hospitalized within 12 weeks of initial COVID diagnosis with a primary diagnosis of  
19 COVID (**Figure 1**).

### 20 21 22 23 24 25 26 27 **Characteristics of COVID Cases**

28  
29 For both primary care and hospitalized cases, the majority of persons with COVID were  
30 adults aged 18-64 (**Table 1**). The age distribution of CPRD primary care cases  
31 generally followed the national case count distribution, with young and middle-aged  
32 adults representing the largest groups, as well as the largest fraction of the English  
33 population (**eTable 7**). Older adults were underrepresented in both cohorts as  
34 compared to national population estimates. Within the primary care cohort, 6% of  
35 patients were aged 65-84 years, whereas 9% of national COVID cases occurred in this  
36 age group. Notable differences were observed in the hospitalized cohort when  
37 compared to the national estimates; 31% vs. 40% were aged 65 - 84 years, and 8% vs.  
38 21% aged  $\geq 85$  years, respectively.

39  
40  
41  
42  
43  
44  
45  
46  
47  
48 The sex distribution of COVID cases in the primary care cohort was comparable to  
49 national estimates, with 55% female in each (**Table 1 and eTable 7**). There were more  
50 males (57%) than females in the hospitalized cohort; there are no national sex-specific  
51 hospital admission counts available.

1  
2  
3 The regional distributions of the CPRD primary care and hospitalized cohorts were  
4 similar to each other, but not the overall country. Both of the study cohorts had larger  
5 proportions of persons with GP practices in higher income regions of England as  
6 compared to national case counts.<sup>26</sup> For example, 20% of persons in the primary care  
7 cohort and 20% in the hospitalized cohort lived in South East region of England, the  
8 region with the highest median total household wealth as reported in March 2020. This  
9 is compared to 20% of CPRD contributing practices, 15% of all English cases and 16%  
10 of the population lived in London (**eTable 8**). Similar trends are seen with lower median  
11 total household wealth regions being proportionally underrepresented in the COVID  
12 CPRD cohort as compared to national case estimates or population distribution.  
13  
14  
15  
16  
17  
18  
19  
20  
21

### 22 **COVID Vaccination Status**

23  
24 At the time of COVID diagnosis, 27% of non-immunocompromised persons and 36% of  
25 immunocompromised persons had completed a primary series of COVID vaccination  
26 (**Table 2**). Among the non-immunocompromised hospitalized COVID cases, 98% were  
27 unvaccinated and none had completed a primary series. For immunocompromised  
28 hospitalized COVID cases, 56% were unvaccinated, 44% had received one dose, and  
29 none had completed a primary series. As of 1 December 2021, 86% of adults had  $\geq 1$   
30 and 80% had  $\geq 2$  COVID vaccine doses (2% and 0.2% lower than official reports,  
31 respectively).  
32  
33  
34  
35  
36  
37  
38  
39

### 40 **Populations at Risk of Severe Disease**

41 After wildcard searches, clinicians reviewed nearly 50,000 codes to set the definitions  
42 for high-risk lists. The final lists contained 12,390 codes for NHS Highest Risk, 9,132  
43 codes for PANORAMIC trial criteria and 7,343 codes for UKHSA Clinical Risk (**attached**  
44 **as machine readable code list files**). In the primary care cohort, 11% met NHS  
45 Highest Risk, 31% PANORAMIC, and 10% UKHSA Clinical Risk criteria (**Table 3**). With  
46 each definition, primary care cohort cases at high risk were more often current smokers  
47 (ranging from 17-21% vs 13% in full cohort) or former smokers (24-28% vs 13%),  
48 overweight (16-19%, vs 9%) or obese (20-28%, vs 10%), and a larger proportion had at  
49 least 1 comorbidity in the Charlson Index (29-54%, vs 11%), where this was recorded.  
50  
51  
52  
53  
54  
55  
56  
57  
58  
59  
60

1  
2  
3 Primary care cases at high risk of severe disease were also older (mean age 49-55  
4 years, vs 34 years), more often female (55-63%, vs 54%), and had more recorded  
5 vaccine doses prior to COVID diagnosis (**eTable 9**).  
6  
7

8  
9  
10 Among hospitalized COVID cases, 33% met NHS Highest Risk, 84% PANORAMIC, and  
11 41% UKHSA Clinical Risk criteria's (**Table 4**). The high risk hospitalized groups were  
12 similar to the overall hospitalized cohort. Nearly half of persons were current smokers  
13 (13-16%, vs 13%) or former smokers (32-39%, vs 29%), and more than half were  
14 overweight (20-23%, vs 18%) or obese (37-42%, vs 35%). Among the hospital admitted  
15 cohort, people meeting each high-risk definition were older (mean age 65-66 years, vs  
16 60 years) (**eTable 10**). Subgroups of patients with the NHS and UKHSA definitions had  
17 higher mean Charlson Comorbidity Indexes, and more females, than high risk patients  
18 identified with the PANORAMIC criteria or the entire hospitalized population.  
19  
20  
21  
22  
23  
24  
25

## 26 27 **DISCUSSION**

28  
29 In this work, we defined and benchmark results from three key variables related to  
30 COVID research using CPRD: index COVID diagnoses, COVID vaccinations, and  
31 persons at high risk of severe disease.  
32  
33  
34  
35

36 We identified 2,271,072 COVID cases in CPRD Aurum between 1 August 2020 through  
37 31 January 2022. Younger age and lower socioeconomic deprivation have been  
38 consistently associated with reductions in COVID incidence and severity.<sup>27,28</sup> These  
39 factors may explain why this CPRD cohort, which proportionally underrepresented  
40 persons age 65 and older and overrepresented persons living in the regions with higher  
41 median total household wealth, captured 15% of COVID cases in a database that  
42 covers 24% of persons in England. Future work using CPRD for COVID research will  
43 need to consider these limitations of under ascertainment of cases. Moving beyond this  
44 study's time period, the transition to at home testing, as well as the end of free PCR  
45 testing for the general public on April 1, 2022, will need to be additionally considered.  
46  
47  
48  
49  
50  
51  
52  
53  
54  
55  
56  
57  
58  
59  
60

1  
2  
3 COVID vaccination events were well captured in the CPRD. This stands in stark  
4 contrast to most administrative claims and EHR databases in the United States, where  
5 less than 50% of COVID vaccines are recorded in comparison to estimates provided by  
6 the Centers for Disease Control and Prevention.<sup>29,30</sup> England's national healthcare  
7 system, as well as the NHS data infrastructure to facilitate capture of COVID-related  
8 events and longstanding structure of general practitioners as the central node in a  
9 person's healthcare coordination, enabled the high coverage of COVID vaccination  
10 records. Researchers can be more confident with CPRD data that the absence of a  
11 vaccination record indicates unvaccinated status than they otherwise would be with  
12 most other real-world datasets, which is a critical consideration for studies related to  
13 COVID disease burden, vaccination, or treatments.  
14  
15  
16  
17  
18  
19  
20  
21  
22  
23

24 The proportion of persons who had completed primary series vaccination prior to  
25 infection was low among primary care cases. Notably, among hospitalized cases, no  
26 patients had completed a primary COVID vaccination series. These findings may be  
27 explained by several factors. First, the COVID vaccine was first made available in  
28 England on 8 December 2020, and initially second doses were given up to 12 weeks  
29 later to maximize limited supply for as many people as possible. Therefore, the calendar  
30 period under study allowed for many persons to have had a COVID diagnosis in periods  
31 at which "full vaccination" was not achievable. Second, it is possible that one vaccine  
32 offered protection against severe illness.<sup>31-33</sup>  
33  
34  
35  
36  
37  
38  
39  
40

41 We operationalized a total of over 28,000 codes, from an initial set of nearly 50,000, for  
42 three definitions of persons at risk of severe disease. We have made the search terms  
43 available, for reproducibility, as well as the resulting code lists, for other research  
44 groups to implement in their work.  
45  
46  
47  
48  
49

50 While there are similarities between the three definitions, differences do exist. In the  
51 example of renal disease, NHS Highest Risk defines as chronic kidney disease stage 4  
52 or 5, PANORAMIC trial criteria stipulate stage 2 or 3, and UKHSA Clinical Risk are for  
53 stages 3-5. PANORAMIC trial eligibility capture persons with mild renal disease, as  
54  
55  
56  
57  
58  
59  
60

1  
2  
3 some antiviral treatments are not approved for use in persons with severe renal  
4 disease. However, UKHSA Clinical Risk prioritized vaccination access for persons at  
5 highest risk of disease, which would include persons with more advanced renal disease.  
6  
7 Notably, persons who have renal disease as defined by PANORAMIC trial criteria by  
8 definition do not have renal disease by NHS definition, and people in each of these may  
9 (or may not) meet UKHSA prioritization. The choice of which high risk definition to  
10 implement in future studies will need to be guided by the study population and research  
11 question.  
12  
13  
14  
15  
16  
17

18 In the primary care cases, persons at high risk were older, more often smokers, had  
19 larger body sizes, and higher Charlson Comorbidity Indices from the overall group of  
20 primary care cases. Among hospitalized cases, the high-risk groups were similar to the  
21 entire hospitalized group. These findings are consistent with existing understanding of  
22 high-risk definitions, and perhaps provide reassurance that the code lists measure the  
23 purported phenomenon.  
24  
25  
26  
27  
28  
29

30  
31 The study periods in this report represent the most recent data available from CPRD as  
32 of 22 March 2023. During the Autumn of 2022, the Aurum database experienced data  
33 quality issues related to the EMIS data flows from legacy systems, and no primary care  
34 data have been made available to researchers since the May 2022 release (data  
35 through March 2022, with some early view of April 2022). Separately, HES secondary  
36 care data have not been updated since March 2021, as NHS Digital has undergone a  
37 change in the way they process and link data. COVID remains a serious disease for  
38 some people, and it is certain that some of the 1.7 million persons diagnosed with  
39 COVID after April 1, 2021 would have been later admitted for COVID, but we do not  
40 have the hospital admission data to distinguish them from those whose cases were  
41 managed entirely in the community setting. Throughout, we have used the term  
42 “primary care records” as the combined groups of those known to be non-hospitalized  
43 (cases where HES data were available, but the person was not hospitalized), as well as  
44 those who we have GP encounters for but unknown eventual hospital admission status.  
45 It is difficult to approximate the number of hospital admissions that would be expected  
46  
47  
48  
49  
50  
51  
52  
53  
54  
55  
56  
57  
58  
59  
60

1  
2  
3 with full data availability. Carrying forward the 2% hospital admission incidence seen in  
4 the early pandemic period may not be appropriate, given 2021 introduced periods of  
5 increased (delta variant) and decreased (omicron variant) risk of hospital admission, as  
6 well the uptake of COVID vaccinations and antiviral treatments. Finally, the population  
7 structure of this cohort outlined in this work further challenge the direct application of  
8 national estimates to CPRD cohorts.  
9  
10  
11  
12  
13

14  
15 The present study does not capture persons not under GP care such as prisoners,  
16 some residential homes, and persons without a place of residence. Additionally, CPRD  
17 Aurum, when linked with HES data, reduces the population to persons registered at  
18 eligible GP practices in England and therefore may not represent persons in other  
19 countries in the UK, or countries outside the UK. This study does not include persons  
20 who presented directly to hospital without any prior GP interaction. In particular, persons  
21 with more severe disease such as older adults may require immediate hospital  
22 admission before seeking primary care, which could explain some of the gaps in  
23 representation we have reported. Given that CPRD is a primary care database, and the  
24 limited time period of hospital data availability, we decided to design our study as an  
25 initial cohort of persons with primary care records of COVID. Studies looking for  
26 complete capture of all hospitalized COVID patients might consider other data sources.  
27  
28  
29  
30  
31  
32  
33  
34  
35  
36

37  
38 In conclusion, we present a cohort of over 2 million COVID cases in linked CPRD-HES  
39 data, using published definitions for COVID cases, vaccinations, and each of three UK-  
40 specific definitions of persons at high risk of severe disease. CPRD primary care data is  
41 a robust real-world data source and can be used for some COVID research questions;  
42 however, limitations of the data availability should be carefully considered.  
43  
44  
45  
46  
47  
48  
49  
50  
51  
52  
53  
54  
55  
56  
57  
58  
59  
60

**TABLE 1: Characteristics of COVID Cases in CPRD Aurum, 1 August 2020 – 31 January 2022**

|                                             | Primary Care COVID Cases<br>(n = 2,257,907) | Hospitalized COVID Cases<br>(n = 13,165) |
|---------------------------------------------|---------------------------------------------|------------------------------------------|
| <b>Age at COVID diagnosis, years</b>        |                                             |                                          |
| 1-4                                         | 40,658 (2%)                                 | 15 (< 1%)                                |
| 5-11                                        | 260,186 (11%)                               | 21 (< 1%)                                |
| 12-17                                       | 263,800 (11%)                               | 24 (< 1%)                                |
| 18-49                                       | 1,161,843 (52%)                             | 3,127 (24%)                              |
| 50-64                                       | 379,528 (17%)                               | 4,844 (37%)                              |
| 65-74                                       | 92,573 (4%)                                 | 2,386 (18%)                              |
| 75-84                                       | 40,481 (2%)                                 | 1,690 (13%)                              |
| 85+                                         | 18,838 (1%)                                 | 1,058 (8%)                               |
| <b>Sex</b>                                  |                                             |                                          |
| Male                                        | 1,046,275 (46%)                             | 7,537 (57%)                              |
| Female                                      | 1,211,592 (54%)                             | 5,628 (43%)                              |
| Unknown                                     | 40 (< 1%)                                   | 0                                        |
| <b>General Practitioner Practice Region</b> |                                             |                                          |
| North East                                  | 83,834 (4%)                                 | 467 (4%)                                 |
| North West                                  | 471,195 (21%)                               | 2,886 (22%)                              |
| Yorkshire and The Humber                    | 71,429 (3%)                                 | 340 (3%)                                 |
| East Midlands                               | 49,651 (2%)                                 | 214 (2%)                                 |
| West Midlands                               | 377,125 (17%)                               | 2,065 (16%)                              |
| East of England                             | 95,139 (4%)                                 | 414 (3%)                                 |
| London                                      | 424,908 (19%)                               | 2,984 (23%)                              |
| South East                                  | 448,536 (20%)                               | 2,682 (20%)                              |
| South West                                  | 235,785 (10%)                               | 1,113 (8%)                               |
| Unknown                                     | 305 (< 1%)                                  | 0                                        |



**TABLE 2: Vaccination Status at COVID Diagnosis in CPRD Aurum, 1 August 2020  
– 31 January 2022**

|                       | Primary Care COVID Cases<br>(n = 2,257,907) | Hospitalized COVID Cases<br>(n = 13,165) |
|-----------------------|---------------------------------------------|------------------------------------------|
| Non-immunocompromised | 2,193,241 (100%)                            | 12,984 (100%)                            |
| Unvaccinated          | 1,170,509 (53%)                             | 12,744 (98%)                             |
| 1 COVID vaccine dose  | 173,853 (8%)                                | 240 (2%)                                 |
| 2 COVID vaccine doses | 598,367 (27%)                               | 0                                        |
| First booster         | 250,512 (12%)                               | 0                                        |
| Immunocompromised     | 64,666 (100%)                               | 181 (100%)                               |
| Unvaccinated          | 1,306 (2%)                                  | 102 (56%)                                |
| 1 COVID vaccine dose  | 6,033 (9%)                                  | 79 (44%)                                 |
| 2 COVID vaccine doses | 33,953 (53%)                                | 0                                        |
| 3 COVID vaccine doses | 23,108 (36%)                                | 0                                        |
| First booster         | 266 (< 1%)                                  | 0                                        |



**Table 3: Clinical Characteristics of Primary Care COVID Cases in CPRD Aurum, by High-Risk Definitions**

|                                           | All<br>(n = 2,257,907) | Meeting NHS Highest<br>Risk Conditions<br>(n = 249,972) | Meeting PANORAMIC<br>Criteria<br>(n = 691,593) | Meeting<br>UKHSA<br>Clinical Risk<br>(n = 225,051) |
|-------------------------------------------|------------------------|---------------------------------------------------------|------------------------------------------------|----------------------------------------------------|
| Primary care cases meeting definition     | --                     | 11%                                                     | 31%                                            | 10%                                                |
| <b>Smoking status</b>                     |                        |                                                         |                                                |                                                    |
| Current smoker                            | 298,735 (13%)          | 44,365 (17%)                                            | 121,019 (18%)                                  | 46,436 (21%)                                       |
| Former smoker                             | 285,722 (13%)          | 67,637 (26%)                                            | 168,343 (24%)                                  | 63,124 (28%)                                       |
| Never smoked                              | 580,239 (26%)          | 87,217 (34%)                                            | 228,579 (33%)                                  | 77,157 (34%)                                       |
| Unknown                                   | 1,093,211 (48%)        | 60,753 (23%)                                            | 173,652 (25%)                                  | 38,334 (17%)                                       |
| <b>Body mass index (kg/m<sup>2</sup>)</b> |                        |                                                         |                                                |                                                    |
| Mean (standard deviation)                 | 27.6 (7.1)             | 29.1 (6.9)                                              | 29.5 (6.7)                                     | 29.5 (7.5)                                         |
| Underweight (< 18.5)                      | 45,194 (2%)            | 3,720 (1%)                                              | 5,305 (1%)                                     | 5,926 (3%)                                         |
| Not overweight (18.5-24.9)                | 226,272 (10%)          | 35,766 (14%)                                            | 81,363 (12%)                                   | 36,716 (16%)                                       |
| Overweight (25.0-29.9)                    | 204,360 (9%)           | 45,261 (17%)                                            | 113,863 (16%)                                  | 43,758 (19%)                                       |
| Obese (≥30.0)                             | 219,253 (10%)          | 53,814 (21%)                                            | 138,035 (20%)                                  | 62,494 (28%)                                       |
| Unknown                                   | 1,562,828 (69%)        | 121,411 (47%)                                           | 353,027 (51%)                                  | 76,157 (34%)                                       |
| <b>Charlson Comorbidity Index</b>         |                        |                                                         |                                                |                                                    |
| Mean (standard deviation)                 | 0.2 (0.6)              | 0.7 (1.3)                                               | 0.5 (1.0)                                      | 1.0 (1.3)                                          |
| 0                                         | 2,003,257 (89%)        | 165,823 (64%)                                           | 487,550 (71%)                                  | 102,790 (46%)                                      |
| 1 or 2                                    | 221,370 (10%)          | 74,805 (29%)                                            | 174,287 (25%)                                  | 99,830 (44%)                                       |
| 3 or 4                                    | 24,554 (1%)            | 12,659 (5%)                                             | 21,574 (3%)                                    | 15,961 (7%)                                        |
| 5+                                        | 8,726 (< 1%)           | 6,685 (3%)                                              | 8,182 (1%)                                     | 6,470 (3%)                                         |

**Table 4: Clinical Characteristics of Hospitalized COVID Cases in CPRD Aurum-HES Linked Data, by High-Risk Definitions**

|                                       | All<br>(n = 13,165) | Meeting NHS Highest Risk<br>Conditions<br>(n = 4,333) | Meeting<br>PANORAMIC<br>Criteria<br>(n = 11,011) | Meeting<br>UKHSA<br>Clinical Risk<br>(n = 5,353) |
|---------------------------------------|---------------------|-------------------------------------------------------|--------------------------------------------------|--------------------------------------------------|
| Hospitalized cases meeting definition | --                  | 33%                                                   | 84%                                              | 41%                                              |
| Smoking status                        |                     |                                                       |                                                  |                                                  |
| Current smoker                        | 1,690 (13%)         | 655 (15%)                                             | 1,476 (13%)                                      | 840 (16%)                                        |
| Former smoker                         | 3,810 (29%)         | 1,574 (36%)                                           | 3,544 (32%)                                      | 2,070 (39%)                                      |
| Never smoked                          | 4,205 (32%)         | 1,362 (31%)                                           | 3,513 (32%)                                      | 1,746 (33%)                                      |
| Unknown                               | 3,460 (26%)         | 742 (17%)                                             | 2,478 (23%)                                      | 697 (13%)                                        |
| Body mass index (kg/m <sup>2</sup> )  |                     |                                                       |                                                  |                                                  |
| Mean (standard deviation)             | 31.9 (7.5)          | 31.4 (7.5)                                            | 31.7 (7.4)                                       | 31.4 (7.7)                                       |
| Underweight (< 18.5)                  | 96 (1%)             | 51 (1%)                                               | 90 (1%)                                          | 70 (1%)                                          |
| Not overweight (18.5-24.9)            | 1,162 (9%)          | 509 (12%)                                             | 1,060 (10%)                                      | 729 (14%)                                        |
| Overweight (25.0-29.9)                | 2,390 (18%)         | 949 (22%)                                             | 2,161 (20%)                                      | 1,239 (23%)                                      |
| Obese (≥30.0)                         | 4,586 (35%)         | 1,662 (38%)                                           | 4,053 (37%)                                      | 2,231 (42%)                                      |
| Unknown                               | 4,931 (37%)         | 1,162 (27%)                                           | 3,647 (33%)                                      | 1,084 (20%)                                      |
| Charlson Comorbidity Index            |                     |                                                       |                                                  |                                                  |
| Mean (standard deviation)             | 1.0 (1.6)           | 1.9 (2.1)                                             | 1.2 (1.7)                                        | 2.0 (2.0)                                        |
| 0                                     | 7,128 (54%)         | 1,283 (30%)                                           | 5,158 (47%)                                      | 894 (17%)                                        |
| 1 or 2                                | 4,241 (32%)         | 1,833 (43%)                                           | 4,094 (37%)                                      | 2,927 (55%)                                      |
| 3 or 4                                | 1,161 (9%)          | 711 (16%)                                             | 1,129 (10%)                                      | 963 (18%)                                        |
| 5+                                    | 635 (5%)            | 506 (12%)                                             | 630 (6%)                                         | 569 (11%)                                        |

## STATEMENTS

### Contributorship

Concept and design: KA, LM, TT, JY

Acquisition, analysis or interpretation of the data: All authors

First draft of the manuscript: KA, LM, KR, JY

Critical revision of the manuscript: All authors

Statistical analysis: KA, MR

The authors gratefully acknowledge Bethany Backhouse, Poppy Payne, Elke Rottier and Robert Wood from Adelphi Real World (Bollington, UK), Tamuno Alfred, Darren Kailung Jeng, Tendai Mugwagwa, Qiao Mu and Chern Chuan Soo from Pfizer Inc. (New York, United States) Agnieszka Gajewska, Tomasz Mikołajczyk and Ewa Śleszyńska-Dopiera from Quanticate (Warsaw, Poland), and Andy Surinach from Genesis Research (Hoboken, United States).

### Funding Statement

This study was funded by Pfizer Inc (no award/grant number). Employees of Pfizer, as well as employees of Adelphi Real World which has received consulting fees from Pfizer, were involved in the study design (collection, analysis, and interpretation of the data), writing of the report, and in the decision to submit the article for publication. All authors had full access to all statistical reports and tables in the study and take responsibility for the integrity of the data and accuracy of the data analysis. All results presented in all tables were quality control verified by a non-Pfizer non-Adelphi employee.

### Competing of Interests

Dr Andersen, Dr McGrath, Ms Reimbaeva, Dr Mendes, Dr Nguyen, Dr Tsang, Ms Malhotra and Dr Yang are employees of Pfizer Inc or Pfizer Ltd and may hold Pfizer stock or stock options. Dr Rai and Mr Tritton are employees of Adelphi Real World which has received consulting fees from Pfizer Inc.

### **Ethics approval**

CPRD obtains ethical research approval annually from the UK's Health Research Authority Research Ethics Committee to accumulate and distribute deidentified data.

This study reports pre-specified analyses according to a registered protocol with CPRD (CPRD study number 22\_002062) and Pfizer documented statistical analysis plan (study number KIMS 3106).

### **Data Sharing Statement**

Electronic health records are considered sensitive data in the UK by the Data Protection Act and cannot be shared. The primary care data can be requested via application to the Clinical Practice Research Datalink, with secondary care data and mortality data through linkage upon application. Information is available from

<https://www.cprd.com/research-applications>.

## REFERENCES

1. UK Government. England Summary | Coronavirus (COVID-19) in the UK. Accessed January 11, 2023. <https://coronavirus.data.gov.uk>
2. CDC. Risk for COVID-19 Infection, Hospitalization, and Death By Age Group. Centers for Disease Control and Prevention. Published February 11, 2020. Accessed January 11, 2023. <https://www.cdc.gov/coronavirus/2019-ncov/covid-data/investigations-discovery/hospitalization-death-by-age.html>
3. NHS. Who is at high risk from coronavirus (COVID-19). nhs.uk. Published March 1, 2021. Accessed January 11, 2023. <https://www.nhs.uk/conditions/coronavirus-covid-19/people-at-higher-risk/who-is-at-high-risk-from-coronavirus/>
4. Herrett E, Gallagher AM, Bhaskaran K, et al. Data Resource Profile: Clinical Practice Research Datalink (CPRD). *Int J Epidemiol*. 2015;44(3):827-836. doi:10.1093/ije/dyv098
5. Coronavirus test results now visible to GPs. NDRS. Accessed February 15, 2023. <https://digital.nhs.uk/news/2020/coronavirus-test-results-now-visible-to-gps>
6. COVID-19 vaccination record queries. NHS Digital. Accessed February 15, 2023. <https://digital.nhs.uk/coronavirus/vaccinations/data-flows-and-resolving-data-queries/covid-19-vaccination-record-queries>
7. Wolf A, Dedman D, Campbell J, et al. Data resource profile: Clinical Practice Research Datalink (CPRD) Aurum. *Int J Epidemiol*. 2019;48(6):1740-1740g. doi:10.1093/ije/dyz034
8. Data highlights | CPRD. Accessed January 11, 2023. <https://www.cprd.com/data-highlights>
9. Population and household estimates, England and Wales: Census 2021 - Office for National Statistics. Accessed January 31, 2023. <https://www.ons.gov.uk/peoplepopulationandcommunity/populationandmigration/populationestimates/datasets/populationandhouseholdestimatesenglandandwalescensus2021>
10. CPRD. Feasibility counts for SARS-CoV-2-related codes in CPRD primary care data (May 2022). <https://cprd.com/sites/default/files/2022-05/SARS-CoV-2%20counts%20May2022.pdf>
11. The rollout of the COVID-19 vaccination programme in England - National Audit Office (NAO) report. National Audit Office (NAO). Published February 25, 2022. Accessed February 16, 2023. <https://www.nao.org.uk/reports/the-roll-out-of-the-covid-19-vaccine-in-england/>

12. Coronavirus » JCVI announcement regarding AstraZeneca vaccine and next steps. Accessed February 16, 2023. <https://www.england.nhs.uk/coronavirus/documents/jcvi-announcement-regarding-astrazeneca-vaccine-and-next-steps/>
13. Coronavirus (COVID-19) vaccine. nhs.uk. Published February 21, 2022. Accessed February 16, 2023. <https://www.nhs.uk/conditions/coronavirus-covid-19/coronavirus-vaccination/coronavirus-vaccine/>
14. Defining the highest-risk clinical subgroups upon community infection with SARS-CoV-2 when considering the use of neutralising monoclonal antibodies (nMABs) and antiviral drugs: independent advisory group report. GOV.UK. Accessed February 16, 2023. <https://www.gov.uk/government/publications/higher-risk-patients-eligible-for-covid-19-treatments-independent-advisory-group-report/defining-the-highest-risk-clinical-subgroups-upon-community-infection-with-sars-cov-2-when-considering-the-use-of-neutralising-monoclonal-antibodies>
15. PANORAMIC Active GP Sites. Google My Maps. Accessed February 16, 2023. <https://www.google.com/maps/d/viewer?mid=1fV1C91Aj4XtRUg1jwPL0oMIDUM8br6mJ>
16. COVID-19: the green book, chapter 14a. GOV.UK. Published September 5, 2022. Accessed February 16, 2023. <https://www.gov.uk/government/publications/covid-19-the-green-book-chapter-14a>
17. Davidson J, Warren-Gash C. Clinical codelist - CPRD Aurum - chronic neurological disease. Published online February 2022. <https://datacompass.lshtm.ac.uk/id/eprint/2817/>
18. Davidson J, Warren-Gash C, McDonald H. Clinical codelist - CPRD Aurum - chronic respiratory disease. Published online January 2021. <https://datacompass.lshtm.ac.uk/id/eprint/2214/>
19. Davidson J, Warren-Gash C, McDonald H, Evans D, Clay S. Clinical codelist - chronic kidney disease. Published online May 2021. <https://datacompass.lshtm.ac.uk/id/eprint/2406/>
20. Davidson J, Warren-Gash C, McDonald H. Clinical codelist - CPRD Aurum - Immunosuppressive conditions. Published online January 2021. <https://datacompass.lshtm.ac.uk/id/eprint/2234/>
21. Dedman D, Carreira H, Strongman H. Clinical codelist - Cancer. Published online May 2021. <https://datacompass.lshtm.ac.uk/id/eprint/2408/>
22. Muzambi R. Clinical codelist - Chronic Liver Disease ICD-10 codes. Published online December 2020. <https://datacompass.lshtm.ac.uk/id/eprint/2032/>

- 1  
2  
3 23. Harriet Forbes, London School of Hygiene & Tropical Medicine, London, United  
4 Kingdom. Clinical Code List - Moderate Immunosuppression OPCS Codes.  
5 <https://doi.org/10.17037/DATA.00001587>.  
6
- 7  
8 24. Cases in England | Coronavirus in the UK. Published January 26, 2023.  
9 Accessed January 31, 2023.  
10 <https://coronavirus.data.gov.uk/details/cases?areaType=nation&areaName=England>  
11
- 12 25. Healthcare in England | Coronavirus in the UK. Published January 26, 2023.  
13 Accessed January 31, 2023.  
14 [https://coronavirus.data.gov.uk/details/healthcare?areaType=nation&areaName=Engl  
15 and](https://coronavirus.data.gov.uk/details/healthcare?areaType=nation&areaName=England)  
16
- 17  
18 26. Household total wealth in Great Britain - Office for National Statistics. Accessed  
19 January 31, 2023.  
20 [https://www.ons.gov.uk/peoplepopulationandcommunity/personalandhouseholdfinanc  
21 es/incomeandwealth/bulletins/totalwealthingreatbritain/april2018tomarch2020](https://www.ons.gov.uk/peoplepopulationandcommunity/personalandhouseholdfinances/incomeandwealth/bulletins/totalwealthingreatbritain/april2018tomarch2020)  
22
- 23 27. Public Health England. Disparities in the risk and outcomes of COVID-19.  
24 [https://assets.publishing.service.gov.uk/government/uploads/system/uploads/attachm  
25 ent\\_data/file/908434/Disparities\\_in\\_the\\_risk\\_and\\_outcomes\\_of\\_COVID\\_August\\_202  
26 0\\_update.pdf](https://assets.publishing.service.gov.uk/government/uploads/system/uploads/attachment_data/file/908434/Disparities_in_the_risk_and_outcomes_of_COVID_August_2020_update.pdf)  
27
- 28  
29 28. Office for National Statistics. Coronavirus (COVID-19) case rates by socio-  
30 demographic characteristics, England: 1 September 2020 to 10 December 2021.  
31 Published online February 14, 2022.  
32 [https://www.ons.gov.uk/peoplepopulationandcommunity/healthandsocialcare/conditio  
33 nsanddiseases/bulletins/coronaviruscovid19caseratesbysociodemographiccharacteri  
34 sticsengland/1september2020to10december2021](https://www.ons.gov.uk/peoplepopulationandcommunity/healthandsocialcare/conditionsanddiseases/bulletins/coronaviruscovid19caseratesbysociodemographiccharacteristicsengland/1september2020to10december2021)  
35
- 36  
37 29. Center for Medicare & Medicaid Services. Assessing the Completeness of  
38 Medicare Claims Data for Measuring COVID-19 Vaccine Administration.  
39 [https://www.cms.gov/files/document/assessing-completeness-medicare-claims-data-  
40 measuring-covid-19-vaccine-administration.pdf](https://www.cms.gov/files/document/assessing-completeness-medicare-claims-data-measuring-covid-19-vaccine-administration.pdf)  
41
- 42  
43 30. Wiemken TL, McGrath LJ, Andersen KM, et al. Coronavirus Disease 2019  
44 Severity and Risk of Subsequent Cardiovascular Events. *Clin Infect Dis*. Published  
45 online August 19, 2022:ciac661. doi:10.1093/cid/ciac661  
46
- 47 31. Polack FP, Thomas SJ, Kitchin N, et al. Safety and Efficacy of the BNT162b2  
48 mRNA Covid-19 Vaccine. *N Engl J Med*. 2020;383(27):2603-2615.  
49 doi:10.1056/NEJMoa2034577  
50
- 51 32. Baden LR, El Sahly HM, Essink B, et al. Efficacy and Safety of the mRNA-1273  
52 SARS-CoV-2 Vaccine. *N Engl J Med*. 2021;384(5):403-416.  
53 doi:10.1056/NEJMoa2035389  
54  
55  
56  
57  
58  
59

- 1  
2  
3 33. Voysey M, Clemens SAC, Madhi SA, et al. Safety and efficacy of the ChAdOx1  
4 nCoV-19 vaccine (AZD1222) against SARS-CoV-2: an interim analysis of four  
5 randomised controlled trials in Brazil, South Africa, and the UK. *The Lancet*.  
6 2021;397(10269):99-111. doi:10.1016/S0140-6736(20)32661-1  
7  
8  
9  
10  
11  
12  
13  
14  
15  
16  
17  
18  
19  
20  
21  
22  
23  
24  
25  
26  
27  
28  
29  
30  
31  
32  
33  
34  
35  
36  
37  
38  
39  
40  
41  
42  
43  
44  
45  
46  
47  
48  
49  
50  
51  
52  
53  
54  
55  
56  
57  
58  
59  
60



1  
2  
3  
4  
5  
6  
7  
8  
9  
10  
11  
12  
13  
14  
15  
16  
17  
18  
19  
20  
21  
22  
23  
24  
25  
26  
27  
28  
29  
30  
31

The overall cohort contained 2,271,072 persons

n= 535,453 diagnosed with COVID in primary care from 1 August 2020 through 31 March 2021

n= 1,735,619 diagnosed with COVID in primary care from 1 April 2021 through 31 January 2022

522,288 (98%) not hospitalized

13,165 (2%) later hospitalized

Hospitalization data unavailable for this time period

ANDERSEN ET AL (2023)

PERSONS DIAGNOSED WITH COVID IN ENGLAND IN THE CPRD: A COHORT DESCRIPTION

**Table of Contents**

|                                                                                                                                                                          |           |
|--------------------------------------------------------------------------------------------------------------------------------------------------------------------------|-----------|
| <b>eTable 1: COVID Cohort Definition</b> .....                                                                                                                           | <b>2</b>  |
| <b>eTable 2: COVID Vaccination Definition</b> .....                                                                                                                      | <b>4</b>  |
| <b>eTable 3: Search Terms for NHS Highest Risk Definition</b> .....                                                                                                      | <b>6</b>  |
| <b>eTable 4: Search Terms for PANORAMIC Eligibility Criteria Definition</b> .....                                                                                        | <b>13</b> |
| <b>eTable 5: Search Terms for UK Health Security Agency Clinical Risk Group Definition</b> .....                                                                         | <b>19</b> |
| <b>eTable 6: Cohort Attrition</b> .....                                                                                                                                  | <b>27</b> |
| <b>eTable 7: Reference National Case Counts and Census Distributions for England</b> .....                                                                               | <b>28</b> |
| <b>eTable 8: Regional Distribution of CPRD COVID cohorts, CPRD Practices, COVID Cases and Population of England</b> .....                                                | <b>29</b> |
| <b>eTable 9: Characteristics of Primary Care COVID Cases in CPRD Aurum, by High Risk Definitions</b> .....                                                               | <b>30</b> |
| <b>eTable 10: Characteristics of Hospitalized COVID Cases in CPRD Aurum-HES Linked Data, by High Risk Definitions</b> .....                                              | <b>31</b> |
| <b>eFigure 1: Date of Diagnosis for 2,271,072 COVID Cases in CPRD Aurum, By Care Setting, August 1, 2020 through January 31, 2022</b> .....                              | <b>32</b> |
| <b>eFigure 2: Date of Diagnosis for 2,257,907 Primary Care COVID Cases in CPRD Aurum, August 1, 2020 through January 31, 2022</b> .....                                  | <b>33</b> |
| <b>eFigure 3: Date of Primary Care Recorded Diagnosis in CPRD Aurum-HES Linked Data for 13,165 Hospitalised COVID Cases, August 1, 2020 through March 31, 2021</b> ..... | <b>34</b> |

ANDERSEN ET AL (2023)

PERSONS DIAGNOSED WITH COVID IN ENGLAND IN THE CPRD: A COHORT DESCRIPTION

**eTable 1: COVID Cohort Definition**

| Medcode           | Term                                                                                                                                |
|-------------------|-------------------------------------------------------------------------------------------------------------------------------------|
| 6874141000006113  | SARS-CoV                                                                                                                            |
| 6604671000006111  | SARS-CoV infection                                                                                                                  |
| 13053051000006117 | 2019-nCoV (novel coronavirus) antigen detection result positive                                                                     |
| 12990741000006116 | 2019-nCoV (novel coronavirus) detected                                                                                              |
| 13483601000006110 | 2019-nCoV (novel coronavirus) detection result positive at the limit of detection                                                   |
| 13483161000006118 | 2019-nCoV (novel coronavirus) ribonucleic acid detected                                                                             |
| 14168601000006119 | Acute COVID-19                                                                                                                      |
| 13486461000006118 | Acute COVID-19 infection                                                                                                            |
| 14168611000006116 | Acute disease caused by Severe acute respiratory syndrome coronavirus 2                                                             |
| 13486471000006113 | Acute disease caused by severe acute respiratory syndrome coronavirus 2 infection                                                   |
| 13486571000006112 | Asymptomatic COVID-19                                                                                                               |
| 13486561000006117 | Asymptomatic SARS-CoV-2 (severe acute respiratory syndrome coronavirus 2) infection                                                 |
| 12802201000006117 | Confirmed 2019-nCoV (novel coronavirus) infection                                                                                   |
| 13012431000006117 | COVID-19                                                                                                                            |
| 13483031000006114 | COVID-19                                                                                                                            |
| 13012441000006110 | COVID-19 caused by SARS-CoV-2 (severe acute respiratory syndrome coronavirus 2)                                                     |
| 13002281000006117 | COVID-19 confirmed by laboratory test                                                                                               |
| 13002311000006115 | COVID-19 confirmed clinically                                                                                                       |
| 13002291000006119 | COVID-19 confirmed using clinical diagnostic criteria                                                                               |
| 13483951000006118 | COVID-19 detected                                                                                                                   |
| 12990531000006116 | Detection of 2019-nCoV (novel coronavirus) using polymerase chain reaction technique                                                |
| 13485771000006110 | Detection of COVID-19                                                                                                               |
| 13485471000006115 | Detection of ribonucleic acid of 2019 novel coronavirus in nasopharyngeal swab                                                      |
| 13485711000006118 | Detection of ribonucleic acid of COVID- 19 using polymerase chain reaction                                                          |
| 13485421000006116 | Detection of ribonucleic acid of Severe acute respiratory syndrome coronavirus 2                                                    |
| 13485461000006110 | Detection of RNA (ribonucleic acid) of SARS-CoV-2 (severe acute respiratory syndrome coronavirus 2) in nasopharyngeal swab          |
| 13485521000006117 | Detection of RNA (ribonucleic acid) of SARS-CoV-2 (severe acute respiratory syndrome coronavirus 2) in oropharyngeal swab           |
| 13485581000006118 | Detection of RNA (ribonucleic acid) of SARS-CoV-2 (severe acute respiratory syndrome coronavirus 2) in sputum                       |
| 13485701000006116 | Detection of RNA (ribonucleic acid) of SARS-CoV-2 (severe acute respiratory syndrome coronavirus 2) using polymerase chain reaction |
| 13485751000006117 | Detection of SARS-CoV-2 (severe acute respiratory syndrome coronavirus 2)                                                           |
| 13485381000006114 | Detection of SARS-CoV-2 (severe acute respiratory syndrome coronavirus 2) antigen                                                   |
| 13012231000006116 | Detection of SARS-CoV-2 (severe acute respiratory syndrome coronavirus 2) using polymerase chain reaction technique                 |

ANDERSEN ET AL (2023)

## PERSONS DIAGNOSED WITH COVID IN ENGLAND IN THE CPRD: A COHORT DESCRIPTION

---

|                   |                                                                                                                                         |
|-------------------|-----------------------------------------------------------------------------------------------------------------------------------------|
| 13483041000006116 | Disease caused by 2019 novel coronavirus                                                                                                |
| 13483051000006119 | Disease caused by 2019-nCoV                                                                                                             |
| 12991131000006119 | Disease caused by 2019-nCoV (novel coronavirus)                                                                                         |
| 13483061000006117 | Disease caused by Severe acute respiratory syndrome coronavirus 2                                                                       |
| 12991141000006112 | Disease caused by Wuhan 2019-nCoV (novel coronavirus)                                                                                   |
| 13053041000006119 | SARS-CoV-2 (severe acute respiratory syndrome coronavirus 2) antigen detection result positive                                          |
| 13012301000006116 | SARS-CoV-2 (severe acute respiratory syndrome coronavirus 2) detected                                                                   |
| 13052351000006112 | SARS-CoV-2 (severe acute respiratory syndrome coronavirus 2) RNA (ribonucleic acid) detection result positive                           |
| 13483141000006117 | SARS-CoV-2 (severe acute respiratory syndrome coronavirus 2) RNA (ribonucleic acid) detection result positive                           |
| 13483591000006119 | SARS-CoV-2 (severe acute respiratory syndrome coronavirus 2) RNA (ribonucleic acid) detection result positive at the limit of detection |
| 13483151000006115 | Severe acute respiratory syndrome coronavirus 2 ribonucleic acid detected                                                               |
| 12990751000006119 | Wuhan 2019-nCoV (novel coronavirus) detected                                                                                            |
| 13002301000006118 | Probable COVID-19 confirmed using clinical diagnostic criteria                                                                          |
| 13483611000006113 | SARS (severe acute respiratory syndrome) coronavirus 2 RNA                                                                              |
| 13484481000006118 | SARS-CoV-2 - severe acute respiratory syndrome coronavirus 2                                                                            |
| 13039281000006117 | SARS-CoV-2 (severe acute respiratory syndrome coronavirus 2) detection result positive                                                  |
| 13052381000006116 | SARS-CoV-2 (severe acute respiratory syndrome coronavirus 2) RNA (ribonucleic acid) qualitative existence in specimen                   |
| 13483941000006115 | Severe acute respiratory syndrome coronavirus 2 detected                                                                                |

---

Note: "SARS-CoV" or "SARS-CoV infection" may refer to the SARS illness of 2003. We allowed these terms, given the novelty of SARS-CoV-2 and potential for erroneous use of SARS-CoV terms, but required them to be used during the time period of COVID (August 2020 onwards).

ANDERSEN ET AL (2023)

PERSONS DIAGNOSED WITH COVID IN ENGLAND IN THE CPRD: A COHORT DESCRIPTION

**eTable 2: COVID Vaccination Definition**

| <b>Product code</b> | <b>Term</b>                                                                                                                                                  |
|---------------------|--------------------------------------------------------------------------------------------------------------------------------------------------------------|
| 13739441000033113   | COVID-19 Vaccine AstraZeneca (ChAdOx1 S [recombinant]) 5x10,000,000 viral particles/0.5ml dose suspension for injection multidose vials (AstraZeneca UK Ltd) |
| 13750541000033115   | COVID-19 Vaccine Janssen (Ad26.COVS-S [recombinant]) 0.5ml dose suspension for injection multidose vials (Janssen-Cilag Ltd)                                 |
| 13860541000033111   | COVID-19 Vaccine Medicago (CoVLP) 3.75micrograms/0.5ml dose emulsion for injection multidose vials (Medicago Inc)                                            |
| 13790341000033117   | COVID-19 Vaccine Novavax (adjuvanted) 5micrograms/0.5ml dose suspension for injection multidose vials (Baxter Oncology GmbH)                                 |
| 13778941000033110   | COVID-19 Vaccine Valneva (inactivated adjuvanted whole virus) 40antigen units/0.5ml dose suspension for injection multidose vials (Valneva UK Ltd)           |
| 13739541000033114   | Comirnaty COVID-19 mRNA Vaccine 30micrograms/0.3ml dose concentrate for dispersion for injection multidose vials (Pfizer Ltd)                                |
| 13764941000033111   | Spikevax COVID-19 mRNA (nucleoside modified) Vaccine 0.1mg/0.5ml dose dispersion for injection multidose vials (Moderna, Inc)                                |
| <b>Medical code</b> | <b>Term</b>                                                                                                                                                  |
| 12990501000006112   | 2019-nCoV (novel coronavirus) vaccination                                                                                                                    |
| 13012221000006119   | SARS-CoV-2 (severe acute respiratory syndrome coronavirus 2) vaccination                                                                                     |
| 13482981000006117   | SARS-CoV-2 (severe acute respiratory syndrome coronavirus 2) vaccination                                                                                     |
| 13482991000006119   | 2019 novel coronavirus vaccination                                                                                                                           |
| 13483001000006118   | Severe acute respiratory syndrome coronavirus 2 vaccination                                                                                                  |
| 13483011000006115   | COVID-19 vaccination                                                                                                                                         |
| 13483021000006111   | 2019-nCoV (novel coronavirus) vaccination                                                                                                                    |
| 13483211000006110   | Immunisation course to achieve immunity against SARS-CoV-2 (severe acute respiratory syndrome coronavirus 2)                                                 |
| 13483221000006119   | Immunisation course to achieve immunity against 2019-nCoV (novel coronavirus)                                                                                |
| 13483231000006116   | Administration of first dose of SARS- CoV-2 (severe acute respiratory syndrome coronavirus 2) vaccine                                                        |
| 13483241000006114   | Administration of first dose of 2019- nCoV (novel coronavirus) vaccine                                                                                       |
| 13483251000006111   | Administration of second dose of SARS- CoV-2 (severe acute respiratory syndrome coronavirus 2) vaccine                                                       |
| 13483261000006113   | Administration of second dose of 2019- nCoV (novel coronavirus) vaccine                                                                                      |
| 13483531000006118   | SARS-CoV-2 (severe acute respiratory syndrome coronavirus 2) immunisation course started                                                                     |
| 13483541000006111   | 2019-nCoV (novel coronavirus) immunisation course started                                                                                                    |
| 14169101000006118   | COVID-19 mRNA vaccine                                                                                                                                        |
| 14170191000006111   | SARS-CoV-2 antigen vaccine or SARS- CoV-2 mRNA vaccine                                                                                                       |
| 14170301000006118   | Administration of first dose of SARS- CoV-2 mRNA vaccine                                                                                                     |
| 14170341000006116   | First COVID-19 mRNA vaccination                                                                                                                              |
| 14170411000006113   | Administration of second dose of SARS- CoV-2 mRNA vaccine                                                                                                    |
| 14170431000006119   | Second COVID-19 mRNA vaccination                                                                                                                             |

ANDERSEN ET AL (2023)

## PERSONS DIAGNOSED WITH COVID IN ENGLAND IN THE CPRD: A COHORT DESCRIPTION

---

|                   |                                                                                                                |
|-------------------|----------------------------------------------------------------------------------------------------------------|
| 14233631000006113 | Immunisation course to maintain protection against SARS-CoV-2 (severe acute respiratory syndrome coronavirus 2 |
| 14233641000006115 | Booster course to maintain protection against SARS-CoV-2 (severe acute respiratory syndrome coronavirus 2)     |
| 14233671000006111 | SARS-CoV-2 (severe acute respiratory syndrome coronavirus 2) immunisation course completed                     |
| 14233841000006119 | SARS-CoV-2 (severe acute respiratory syndrome coronavirus 2) protection maintenance course started             |
| 14233871000006110 | SARS-CoV-2 (severe acute respiratory syndrome coronavirus 2) protection maintenance course completed           |
| 14233881000006113 | Severe acute respiratory syndrome coronavirus 2 protection maintenance course done                             |
| 14283421000006117 | Administration of fourth dose of SARS- CoV-2 (severe acute respiratory syndrome coronavirus 2) vaccine         |
| 14283481000006118 | Administration of fifth dose of SARS- CoV-2 (severe acute respiratory syndrome coronavirus 2) vaccine          |
| 14283541000006113 | Administration of third dose of SARS- CoV-2 (severe acute respiratory syndrome coronavirus 2) vaccine          |

---

ANDERSEN ET AL (2023)

PERSONS DIAGNOSED WITH COVID IN ENGLAND IN THE CPRD: A COHORT DESCRIPTION

**eTable 3: Search Terms for NHS Highest Risk Definition**

Note: this list reflects the report “Defining the highest-risk clinical subgroups upon community infection with SARS-CoV-2 when considering the use of neutralising monoclonal antibodies (nMABs) and antiviral drugs: independent advisory group report” version published on May 30, 2022.

| Classification as defined by England’s Deputy Chief Medical Officer | Concept as operationalized by Andersen et al                                                                                                                                                                                                                   | Search term                                                                                                                                                                                                                                                                                                                                                                                           |
|---------------------------------------------------------------------|----------------------------------------------------------------------------------------------------------------------------------------------------------------------------------------------------------------------------------------------------------------|-------------------------------------------------------------------------------------------------------------------------------------------------------------------------------------------------------------------------------------------------------------------------------------------------------------------------------------------------------------------------------------------------------|
| Down’s syndrome and other genetic disorders                         | Down’s syndrome or other chromosomal disorder known to affect immune competence                                                                                                                                                                                | *down*<br>*trisom*<br>*mongol*                                                                                                                                                                                                                                                                                                                                                                        |
| Solid cancer                                                        | We identified a code list “Clinical codelist – Cancer”, which did not separate solid from liquid (blood) cancers. We systematically excluded blood cancers from the list by excluding the following terms, and had the resulting list reviewed by a clinician: | leuk<br>Lymphoma<br>lymphatic<br>Lymphoid<br>lymphosarc<br>myeloma<br>myeloid<br>myeloscler<br>myelofib<br>myelosis<br>myeloprol<br>myelody<br>walden<br>anem<br>anaem<br>raeb<br>nodular scler<br>mycosis<br>sezary<br>zary<br>hodgk<br>heavy<br>plasma<br>marrow<br>haemato<br>hemota<br>erythraem<br>erythrem<br>heilmeyer<br>lymphadenopathy<br>polycyt<br>erythrocyt<br>erythrodys<br>thrombocyt |

ANDERSEN ET AL (2023)

## PERSONS DIAGNOSED WITH COVID IN ENGLAND IN THE CPRD: A COHORT DESCRIPTION

|                                                                                |                                                       |                       |
|--------------------------------------------------------------------------------|-------------------------------------------------------|-----------------------|
|                                                                                |                                                       | franklin              |
|                                                                                |                                                       | immunoprolif          |
|                                                                                |                                                       | reticulosarc          |
|                                                                                |                                                       | chloroma              |
|                                                                                |                                                       | macroglob             |
|                                                                                |                                                       | reticulosis           |
|                                                                                |                                                       | kahler                |
|                                                                                |                                                       | burkitt               |
|                                                                                |                                                       | di guglielmo          |
|                                                                                |                                                       | langer                |
|                                                                                |                                                       | histiocytosis         |
|                                                                                |                                                       | germinoblast          |
|                                                                                |                                                       | letterer              |
|                                                                                |                                                       | FAB                   |
|                                                                                |                                                       | Mastocytosis          |
| Haematological diseases and recipients of haematological stem cell transplants | Amyloidosis                                           | *amyloid*             |
|                                                                                | Graft Versus Host disease                             | *GVHD*                |
|                                                                                |                                                       | *Graft V*             |
|                                                                                |                                                       | *Graft-V*             |
|                                                                                |                                                       | *reject*              |
|                                                                                |                                                       | *trans*               |
|                                                                                |                                                       | *fail* *trans*        |
|                                                                                | Myelodysplastic syndrome                              | *MDS*                 |
|                                                                                |                                                       | *myelod*              |
|                                                                                |                                                       | *preleuk*             |
|                                                                                |                                                       | *smouldering leuk*    |
|                                                                                | Chronic myelomonocytic leukaemia                      | *CMML*                |
|                                                                                |                                                       | *chronic myelom*      |
|                                                                                | Sickle cell disease                                   | *sickl*               |
|                                                                                |                                                       | *SCD*                 |
|                                                                                | Myeloma                                               | *myelom*              |
|                                                                                |                                                       | *kahler*              |
|                                                                                | Myelofibrosis                                         | *myelof*              |
|                                                                                |                                                       | *PMF*                 |
|                                                                                |                                                       | *idiopath* *fibrosis* |
|                                                                                |                                                       | *myelod metaplasia*   |
|                                                                                | Rare inherited anemia                                 | *anaem*               |
|                                                                                |                                                       | *anem*                |
|                                                                                | Chronic lymphocytic leukaemia and Follicular lymphoma | *lymphoma*            |
|                                                                                |                                                       | *NHL*                 |
|                                                                                |                                                       | * hodgk*              |
|                                                                                |                                                       | *nodular scler*       |
|                                                                                |                                                       | *mycosis fung*        |
|                                                                                |                                                       | *sezary*              |
|                                                                                |                                                       | *walden*              |
|                                                                                | Thalassaemia                                          | *thalass*             |
|                                                                                |                                                       | *cooley*              |
|                                                                                |                                                       | *mediterr*            |
|                                                                                |                                                       | *constant spring*     |
|                                                                                |                                                       | *haemoglobin h*       |



ANDERSEN ET AL (2023)

## PERSONS DIAGNOSED WITH COVID IN ENGLAND IN THE CPRD: A COHORT DESCRIPTION

|               |                                                                                               |                         |
|---------------|-----------------------------------------------------------------------------------------------|-------------------------|
|               |                                                                                               | *hemoglobin h*          |
|               |                                                                                               | *hb h*                  |
|               |                                                                                               | *haemoglobin bart*      |
|               |                                                                                               | *hemoglobin bart*       |
|               |                                                                                               | *hb bart*               |
|               | Systemic anti-cancer treatments:                                                              |                         |
|               | Davidson, J, Warren-Gash, C and Mcdonald, H (2021). Clinical codelist - CPRD                  |                         |
|               | Aurum - Immunosuppressive conditions. [Data Collection]. London School of                     |                         |
|               | Hygiene & Tropical Medicine, London, United Kingdom.                                          |                         |
|               | <a href="https://doi.org/10.17037/DATA.00002234">https://doi.org/10.17037/DATA.00002234</a> . |                         |
| Renal disease | Davidson, J, Warren-Gash, C, Mcdonald, H, Evans, D and Clay, S (2021). Clinical               |                         |
|               | codelist - chronic kidney disease. [Data Collection]. London School of Hygiene &              |                         |
|               | Tropical Medicine, London, United Kingdom.                                                    |                         |
|               | <a href="https://doi.org/10.17037/DATA.00002406">https://doi.org/10.17037/DATA.00002406</a> . |                         |
|               | CKD, stage 4 or 5                                                                             | *CKD*                   |
|               |                                                                                               | *renal* *disease*       |
|               |                                                                                               | *renal* *failure*       |
|               |                                                                                               | *renal* *insufficiency* |
|               |                                                                                               | *renal* *disorder*      |
|               |                                                                                               | *kidney* *disease*      |
|               |                                                                                               | *kidney* *disorder*     |
|               |                                                                                               | *kidney* *failure*      |
|               |                                                                                               | *eGFR*                  |
|               |                                                                                               | *estimated*             |
|               |                                                                                               | *glomerular*            |
|               |                                                                                               | *filtration* *rate*     |
|               |                                                                                               | *disease* *renal*       |
|               |                                                                                               | *failure* *renal*       |
|               |                                                                                               | *insufficiency* *renal* |
|               |                                                                                               | *disorder* *renal*      |
|               |                                                                                               | *disease* *kidney*      |
|               |                                                                                               | *disorder* *kidney*     |
|               |                                                                                               | *failure* *kidney*      |
| Liver disease | Cirrhosis                                                                                     | *cirrhos*               |
| Solid organ   | Solid organ transplant                                                                        | *transplant*            |
| transplant    |                                                                                               | *organ* *recipient*     |
| recipients    |                                                                                               | *heart* *recipient*     |
|               |                                                                                               | *lung* *recipient*      |
|               |                                                                                               | *pancreas*              |
|               |                                                                                               | *recipient*             |
|               |                                                                                               | *kidney* *recipient*    |
|               |                                                                                               | *intestine* *recipient* |
|               |                                                                                               | *gland* *recipient*     |
|               |                                                                                               | *stomach* *recipient*   |
|               |                                                                                               | *spleen* *recipient*    |
|               |                                                                                               | *liver* *recipient*     |
|               |                                                                                               | *bladder* *recipient*   |
| Immune-       | People who have received a B-cell depleting therapy in the                                    | Obinutuzumab            |
| mediated      | last 12 months                                                                                | Ocrelizumab             |

ANDERSEN ET AL (2023)

## PERSONS DIAGNOSED WITH COVID IN ENGLAND IN THE CPRD: A COHORT DESCRIPTION

|                                  |                                                                                                                                                                               |                                                                                                                                                                                                                                          |
|----------------------------------|-------------------------------------------------------------------------------------------------------------------------------------------------------------------------------|------------------------------------------------------------------------------------------------------------------------------------------------------------------------------------------------------------------------------------------|
| inflammatory disorders           | People who have been treated with cyclophosphamide (IV or oral) in the 6 months prior                                                                                         | Ofatumumab<br>Rituximab<br>Cyclophosphamide                                                                                                                                                                                              |
|                                  | People who are on biologics or small molecule JAK-inhibitors (except anti-CD20 depleting monoclonal antibodies) or who have received these therapies within the last 6 months | Abatacept<br>Adalimumab<br>Baracitinib<br>Belimumab<br>Certolizumab pegol<br>Etanercept<br>Golimumab<br>Infliximab<br>Ixekizumab<br>Sarilumab<br>Secukinumab<br>Tocilizumab<br>Tofacitinib<br>Upadacitinib<br>Ustekinumab<br>Vedolizumab |
|                                  | People who are on corticosteroids (equivalent to greater than 10mg per day of prednisolone) for at least the 28 days prior                                                    | Betamethasone<br>Cortisone<br>Dexamethasone<br>Hydrocortisone<br>Methylprednisolone<br>Prednisolone<br>Prednisone<br>Triamcinolone                                                                                                       |
|                                  | People who are on current treatment with: methotrexate (for interstitial lung disease) and/or ciclosporin                                                                     | Mycophenolate<br>Tacrolimus, oral<br>Azathioprine with mercaptopurine<br>Methotrexate<br>Ciclosporin                                                                                                                                     |
| Giant cell arteritis             |                                                                                                                                                                               | *giant cell arterit*                                                                                                                                                                                                                     |
| Sarcoidosis                      |                                                                                                                                                                               | *sarcoid*                                                                                                                                                                                                                                |
|                                  |                                                                                                                                                                               | *Besnier*                                                                                                                                                                                                                                |
| Psoriatic arthritis or psoriasis |                                                                                                                                                                               | *arthr*                                                                                                                                                                                                                                  |
|                                  |                                                                                                                                                                               | *psoria*                                                                                                                                                                                                                                 |
| Autoimmune hepatitis             |                                                                                                                                                                               | *autoimmune hep*                                                                                                                                                                                                                         |
|                                  |                                                                                                                                                                               | *hepatitis auto*                                                                                                                                                                                                                         |
|                                  |                                                                                                                                                                               | *AIH*                                                                                                                                                                                                                                    |
|                                  |                                                                                                                                                                               | *lupoid hep*                                                                                                                                                                                                                             |
|                                  |                                                                                                                                                                               | *autoimmune chron*                                                                                                                                                                                                                       |
|                                  |                                                                                                                                                                               | *autoimmune act*                                                                                                                                                                                                                         |
|                                  |                                                                                                                                                                               | *autoimmune agg*                                                                                                                                                                                                                         |
| Crohn's disease                  |                                                                                                                                                                               | *crohn*                                                                                                                                                                                                                                  |
|                                  |                                                                                                                                                                               | *regional ent*                                                                                                                                                                                                                           |
|                                  |                                                                                                                                                                               | *granulomatous ent*                                                                                                                                                                                                                      |
|                                  |                                                                                                                                                                               | *ileocoli*                                                                                                                                                                                                                               |
|                                  |                                                                                                                                                                               | *Jejunioileitis*                                                                                                                                                                                                                         |

ANDERSEN ET AL (2023)

PERSONS DIAGNOSED WITH COVID IN ENGLAND IN THE CPRD: A COHORT DESCRIPTION

|  |                              |                          |
|--|------------------------------|--------------------------|
|  |                              | *granulomatous col*      |
|  |                              | *type 1 dia*             |
|  |                              | *type I dia*             |
|  |                              | *diabetes mellitus       |
|  |                              | juv*                     |
|  |                              | *diabetes mellitus       |
|  |                              | *insulin dep*            |
|  |                              | *juvenile onset dia*     |
|  |                              | *juvenile-onset dia*     |
|  |                              | *juvenile-onset          |
|  |                              | *diabetes mellitus       |
|  |                              | type 1*                  |
|  |                              | *diabetes mellitus       |
|  |                              | type I*                  |
|  |                              | *diabetes type 1*        |
|  |                              | *diabetes type I*        |
|  | Ankylosing spondylitis       | *ankylosing*             |
|  |                              | *Bekhterev*              |
|  |                              | *Rheumatoid arthritis    |
|  |                              | of spine*                |
|  |                              | *spine rheum*            |
|  |                              | *rheumatoid arthritis    |
|  |                              | of*                      |
|  |                              | *rheumatoid* *spine*     |
|  | Rheumatoid arthritis         | *rheumatoid*             |
|  |                              | *felty*                  |
|  |                              | *caplan*                 |
|  |                              | *rheum.*                 |
|  |                              | *atrophic art*           |
|  |                              | *chronic rheumatic       |
|  |                              | art*                     |
|  |                              | *prolif* *art*           |
|  |                              | *lupus*                  |
|  | Systemic lupus erythematosus | *scleroderma*            |
|  | Scleroderma                  | *systemic sclero*        |
|  |                              | *crest s*                |
|  |                              | *morphea*                |
|  |                              | *morphoea*               |
|  | Ulcerative colitis           | *ulcerative* *colitis*   |
|  |                              | *ulcerative* *proctitis* |
|  |                              | *rectosigmoiditis*       |
|  |                              | *inflam* *polyps*        |
|  |                              | *left* *colitis*         |
|  |                              | *ulcerative* *panc*      |
|  |                              | *extensive* *colitis*    |
|  |                              | *proctosigmoiditis*      |
|  |                              | *backwash* *ileitis*     |
|  |                              | *distal* *colitis*       |
|  |                              | *inflam* *bowel*         |
|  | Immunodeficiencies           | *cvid*                   |

ANDERSEN ET AL (2023)

PERSONS DIAGNOSED WITH COVID IN ENGLAND IN THE CPRD: A COHORT DESCRIPTION

|                                                                               |                                                                                                                                   |                                                                                                                                                                                                                                                                                                                                                                                                                                                                                                                                                                                     |
|-------------------------------------------------------------------------------|-----------------------------------------------------------------------------------------------------------------------------------|-------------------------------------------------------------------------------------------------------------------------------------------------------------------------------------------------------------------------------------------------------------------------------------------------------------------------------------------------------------------------------------------------------------------------------------------------------------------------------------------------------------------------------------------------------------------------------------|
| Immune deficiencies                                                           |                                                                                                                                   | <ul style="list-style-type: none"> <li>*common*</li> <li>*immunodeficienc*</li> <li>*antibody* *deficienc*</li> <li>Hyper* *igm*</li> <li>*higm*</li> <li>*good* *syndrom*</li> <li>*thymom* *deficienc*</li> <li>*severe* *combin*</li> <li>*immunodeficienc*</li> <li>*SCID*</li> <li>*aps-1*</li> <li>*pas-2*</li> <li>*polygland*</li> <li>*autoimmune*</li> <li>*autoimmune*</li> <li>*polygland*</li> <li>*polyendocrinopath*</li> <li>*ectodermal dystroph*</li> <li>*apeced*</li> <li>*ifn* *signal*</li> <li>*interferon* *signal*</li> <li>*gammaglobulinaemi*</li> </ul> |
| HIV/AIDS                                                                      | HIV                                                                                                                               | <ul style="list-style-type: none"> <li>*HIV*</li> <li>*immunodeficiency vir*</li> </ul>                                                                                                                                                                                                                                                                                                                                                                                                                                                                                             |
| Rare neurological and severe complex life-limiting neurodisability conditions | <ul style="list-style-type: none"> <li>Multiple sclerosis</li> <li>Motor neurone disease</li> <li>Huntington's disease</li> </ul> | <ul style="list-style-type: none"> <li>*Multiple sclerosis*</li> <li>*sclerosis multiple*</li> <li>*encephalomyelit*</li> <li>*disseminat*</li> <li>* ms*</li> <li>*motor* *neurone* disease*</li> <li>*kennedy*</li> <li>*amyotrophic*</li> <li>*lateral **sclerosis*</li> <li>*ALS*</li> <li>*primary* *lateral* sclerosis*</li> <li>*progressive*</li> <li>*bulbar* *palsy*</li> <li>*progressive*</li> <li>*spinal* muscular*</li> <li>*atrophy*</li> <li>*huntington*</li> <li>*huntington*</li> <li>*disease*</li> <li>*Huntington*</li> <li>*chorea*</li> </ul>              |

ANDERSEN ET AL (2023)  
PERSONS DIAGNOSED WITH COVID IN ENGLAND IN THE CPRD: A COHORT DESCRIPTION

---

Myasthenia gravis

\*myasthenia\* \*gravis\*

---

For peer review only

1  
2  
3  
4  
5  
6  
7  
8  
9  
10  
11  
12  
13  
14  
15  
16  
17  
18  
19  
20  
21  
22  
23  
24  
25  
26  
27  
28  
29  
30  
31  
32  
33  
34  
35  
36  
37  
38  
39  
40  
41  
42  
43  
44  
45  
46  
47  
48  
49  
50  
51  
52  
53  
54  
55  
56  
57  
58  
59  
60

ANDERSEN ET AL (2023)

PERSONS DIAGNOSED WITH COVID IN ENGLAND IN THE CPRD: A COHORT DESCRIPTION

**eTable 4: Search Terms for PANORAMIC Eligibility Criteria Definition**

| Inclusion criteria as in PANORAMIC protocol                                                                                                                                              | Concept as operationalized by Andersen et al                                                                                                                                                                                                                                                                                                                                                                                                                                                                                                                                                                                                                                                                    | Search term                                                                                                                                                                                                                                                                                                                                                                                                                                                                                                                                                                                                                                                                                                                                                                                                                                                                                                           |
|------------------------------------------------------------------------------------------------------------------------------------------------------------------------------------------|-----------------------------------------------------------------------------------------------------------------------------------------------------------------------------------------------------------------------------------------------------------------------------------------------------------------------------------------------------------------------------------------------------------------------------------------------------------------------------------------------------------------------------------------------------------------------------------------------------------------------------------------------------------------------------------------------------------------|-----------------------------------------------------------------------------------------------------------------------------------------------------------------------------------------------------------------------------------------------------------------------------------------------------------------------------------------------------------------------------------------------------------------------------------------------------------------------------------------------------------------------------------------------------------------------------------------------------------------------------------------------------------------------------------------------------------------------------------------------------------------------------------------------------------------------------------------------------------------------------------------------------------------------|
| Chronic respiratory disease (including chronic obstructive pulmonary disease (COPD), cystic fibrosis and asthma requiring at least daily use of preventative and/or reliever medication) | Davidson, J, Warren-Gash, C and McDonald, H (2021). Clinical codelist - CPRD Aurum - chronic respiratory disease. [Data Collection]. London School of Hygiene & Tropical Medicine, London, United Kingdom.<br><a href="https://doi.org/10.17037/DATA.00002214">https://doi.org/10.17037/DATA.00002214</a> .<br><br>We also included product codes for asthma medications, using all drugs classified by the British National Formulary under the following categories:<br>Short-acting beta agonists (SABA)<br>Short-acting muscarinic antagonists (SAMA)<br>Inhaled corticosteroids (ICS)<br>Long-acting beta agonists (LABA)<br>Long-acting muscarinic antagonist (LAMA)<br>Methylxanthine<br>PDE-4 inhibitor |                                                                                                                                                                                                                                                                                                                                                                                                                                                                                                                                                                                                                                                                                                                                                                                                                                                                                                                       |
| Chronic heart or vascular disease                                                                                                                                                        | Atherosclerosis/Arteriosclerosis<br>Stenosis<br><br>Cerebrovascular disease (not including stroke/TIA - included in PANORAMIC)<br>Pulmonary embolism<br>Systolic/diastolic dysfunction<br>Chronic arrhythmias<br>Myocardial infarction<br>Hypertension<br><br>Venous thromboembolism/DVT<br><br>Heart failure<br>Atrial fibrillation<br>Ischaemic and peripheral heart disease<br><br>Congenital heart/cardiac disease<br>Various                                                                                                                                                                                                                                                                               | *athero*;*arterioscl*;*ASVD*;*obliter*;*endart*<br>*steno* *aort*;*steno* *vasc*;*steno*<br>*heart*;*steno* *card*;*strict* *aort*;*strict*<br>*vasc*;*heart* *stict*;*card* *strict*;<br>*cerebro* *disea*;*subarac* *haem*;*vasc*<br>*demen*;*arterio* *demen*;*infar* *demen*<br><br>*pul* *embo*;<br>*syst* *dys*;*dia* *dys*;*dys* *syst*<br>*AFL*;*atria* *flut*;*arrhyth*;*dysrhy*<br>*myo* *infarc*;*heart* *att*;* AMI<br>*hyperten*;*high* *blood**pres*;<br>bp*;*bp*;*bp*HBP*;*HTN*<br>*VTE*;*thrombo*;*DVT*;*blood* clot*;*pulmon*<br>*embolis*;*pe*;*pe*;*pe*;<br>*CCF*;*CHF*;*hear* *fail*;*card* *fail*;<br>* fibrilla*;* fibrilla*;* af *;*af*;* Afib*<br>*hear* *diseas*;<br>*artero* *diseas*;<br>*vasc* *diseas*;<br>*CAD*;<br>*ihd*;<br>*myocard* *isch*;<br>*chd*<br>*congen* *hear*;*congen* *card*;*CHD*<br>*Aneurysm*<br>*May-Thurner*<br>*Thoracic* *outlet*<br>*Fibromuscular*<br>*Klippel* |

ANDERSEN ET AL (2023)

PERSONS DIAGNOSED WITH COVID IN ENGLAND IN THE CPRD: A COHORT DESCRIPTION

|  |  |                                              |
|--|--|----------------------------------------------|
|  |  | *lymphedema*                                 |
|  |  | *hypoten*                                    |
|  |  | *Telangiect*                                 |
|  |  | *Vasculit*                                   |
|  |  | *body* *tumour*                              |
|  |  | *Claudication*                               |
|  |  | *Varicose*                                   |
|  |  | *Venous* *insufficiency*                     |
|  |  | *artery* *dissection*                        |
|  |  |                                              |
|  |  | *CKD*                                        |
|  |  | *renal* *disease*                            |
|  |  | *renal* *failure*                            |
|  |  | *renal* *insufficiency*                      |
|  |  | *renal* *disorder*                           |
|  |  | *kidney* *disease*                           |
|  |  | *kidney* *disorder*                          |
|  |  | *kidney* *failure*                           |
|  |  | *eGFR*                                       |
|  |  | *estimated* *glomerular* *filtration* *rate* |
|  |  | *disease* *renal*                            |
|  |  | *failure* *renal*                            |
|  |  | *insufficiency* *renal*                      |
|  |  | *disorder* *renal*                           |
|  |  | *disease* *kidney*                           |
|  |  | *disorder* *kidney*                          |
|  |  | *failure* *kidney*                           |
|  |  |                                              |
|  |  | *biliary c*                                  |
|  |  | *destructive* *chol*                         |
|  |  | *cirrhos*                                    |
|  |  | *sclero* *cholangit*                         |
|  |  | *recurr* *cholangit*                         |
|  |  | *chron* *cholangit*                          |
|  |  | *chron* *hepat*                              |
|  |  | *hepat* *chron*                              |
|  |  | *acute* *yellow* *atroph*                    |
|  |  | *hepat* *notif*                              |
|  |  | *granul* *hepat*                             |
|  |  | *alpha* *hepat*                              |
|  |  | *hepat* *tox*                                |
|  |  | *toxop* *hepat*                              |
|  |  | *acute hepatitis c*                          |
|  |  | *alcoh* *hepat*                              |
|  |  | *subacute* *hepat*                           |
|  |  | *nonspec* *hepat*                            |
|  |  | *nonalco* *liver* *dis*                      |
|  |  | *hepat* *malaria*                            |
|  |  | *malaria* *hepat*                            |
|  |  | *autoimm* *hepat*                            |
|  |  | *hepatitis c without*                        |

ANDERSEN ET AL (2023)

## PERSONS DIAGNOSED WITH COVID IN ENGLAND IN THE CPRD: A COHORT DESCRIPTION

|    |                                                                     |                                                                                                                                                                                                                                                                                              |
|----|---------------------------------------------------------------------|----------------------------------------------------------------------------------------------------------------------------------------------------------------------------------------------------------------------------------------------------------------------------------------------|
|    |                                                                     | '*toxic* *hepat*'                                                                                                                                                                                                                                                                            |
|    |                                                                     | '*hepatitis C*'                                                                                                                                                                                                                                                                              |
|    |                                                                     | '*sequelae* *viral* *hep*'                                                                                                                                                                                                                                                                   |
|    |                                                                     | '*chron* *liver* *dis*'                                                                                                                                                                                                                                                                      |
|    |                                                                     | '*oesoph* *varices*'                                                                                                                                                                                                                                                                         |
|    |                                                                     | '*varices* *oesoph*'                                                                                                                                                                                                                                                                         |
|    |                                                                     | '*hepat* *coma*'                                                                                                                                                                                                                                                                             |
|    |                                                                     | '**coma* *hepat*'                                                                                                                                                                                                                                                                            |
|    |                                                                     | '*enceph* *hepat*'                                                                                                                                                                                                                                                                           |
|    |                                                                     | 'hepat* *enceph*'                                                                                                                                                                                                                                                                            |
|    |                                                                     | '*sequelae* *liver*'                                                                                                                                                                                                                                                                         |
|    |                                                                     | '*liver* *sequelae*'                                                                                                                                                                                                                                                                         |
|    |                                                                     | '*portal* *hyperten*'                                                                                                                                                                                                                                                                        |
|    |                                                                     | '*hepatoren* *syndro*'                                                                                                                                                                                                                                                                       |
|    |                                                                     | '*syndro* *hepatoren*'                                                                                                                                                                                                                                                                       |
|    |                                                                     | '*eosophag* *varices*'                                                                                                                                                                                                                                                                       |
| 21 | Chronic neurological disease (including dementia, stroke, epilepsy) | Davidson, J and Warren-Gash, C (2022). Clinical codelist - CPRD Aurum - chronic neurological disease. [Data Collection]. London School of Hygiene & Tropical Medicine, London, United Kingdom. <a href="https://doi.org/10.17037/DATA.00002817">https://doi.org/10.17037/DATA.00002817</a> . |
| 25 |                                                                     | PANORAMIC criteria details epilepsy and stroke as chronic neurological conditions which were not reflected in the existing code list, and were added using the following search terms                                                                                                        |
| 29 | Epilepsy                                                            | *epilep*                                                                                                                                                                                                                                                                                     |
| 30 | Stroke                                                              | *stroke*                                                                                                                                                                                                                                                                                     |
| 31 |                                                                     | *stroke*                                                                                                                                                                                                                                                                                     |
| 32 |                                                                     | *cerebr* *infac*                                                                                                                                                                                                                                                                             |
| 33 |                                                                     | *cerebr* *acc*                                                                                                                                                                                                                                                                               |
| 34 |                                                                     | *CVA*                                                                                                                                                                                                                                                                                        |
| 35 |                                                                     | *Tran* *ischemic*                                                                                                                                                                                                                                                                            |
| 37 | Severe and profound learning disability                             | *learning* *dis*                                                                                                                                                                                                                                                                             |
| 38 |                                                                     | *learning* *diff*                                                                                                                                                                                                                                                                            |
| 39 |                                                                     | *retard*                                                                                                                                                                                                                                                                                     |
| 41 | Angelman syndrome                                                   | *angelman*                                                                                                                                                                                                                                                                                   |
| 42 | Coffin-Lowry syndrome                                               | *Coffin-lowry*                                                                                                                                                                                                                                                                               |
| 43 | Cornelia de lange syndrome                                          | *cornelia* *lange*                                                                                                                                                                                                                                                                           |
| 44 | Cri du chat syndrome                                                | *cri du chat*                                                                                                                                                                                                                                                                                |
| 45 |                                                                     | *5p Deletion*                                                                                                                                                                                                                                                                                |
| 46 |                                                                     | *cat* *cry*                                                                                                                                                                                                                                                                                  |
| 47 | Dubowitz's syndrome                                                 | *dubowitz*                                                                                                                                                                                                                                                                                   |
| 48 | Edward's syndrome                                                   | *edwards* *synd*                                                                                                                                                                                                                                                                             |
| 49 |                                                                     | *Trisomy* *18*                                                                                                                                                                                                                                                                               |
| 50 | Hurler's syndrome                                                   | *hurler*                                                                                                                                                                                                                                                                                     |
| 51 |                                                                     | *mucopolysacc*                                                                                                                                                                                                                                                                               |
| 52 | Laurence-Moon Syndrome                                              | *laurence-moon*                                                                                                                                                                                                                                                                              |
| 53 | Mowat-Wilson syndrome                                               | *Mowat-Wilson*                                                                                                                                                                                                                                                                               |
| 54 | Patau syndrome                                                      | *Patau*                                                                                                                                                                                                                                                                                      |
| 55 |                                                                     | *Trisomy* *13*                                                                                                                                                                                                                                                                               |



ANDERSEN ET AL (2023)

## PERSONS DIAGNOSED WITH COVID IN ENGLAND IN THE CPRD: A COHORT DESCRIPTION

|                                                                                                                                                                                                                                                                                    |                                                                                                                                                                                                                                                                     |                                                                                                            |
|------------------------------------------------------------------------------------------------------------------------------------------------------------------------------------------------------------------------------------------------------------------------------------|---------------------------------------------------------------------------------------------------------------------------------------------------------------------------------------------------------------------------------------------------------------------|------------------------------------------------------------------------------------------------------------|
|                                                                                                                                                                                                                                                                                    | Rett syndrome                                                                                                                                                                                                                                                       | *rett *                                                                                                    |
|                                                                                                                                                                                                                                                                                    | Smith-Magenis syndrome                                                                                                                                                                                                                                              | *Smith-Magenis*                                                                                            |
|                                                                                                                                                                                                                                                                                    |                                                                                                                                                                                                                                                                     | *Chromosome* *deletion*                                                                                    |
|                                                                                                                                                                                                                                                                                    | Wolff - Hirschorn syndrome                                                                                                                                                                                                                                          | *wolf* *Hirs*                                                                                              |
| Down's syndrome                                                                                                                                                                                                                                                                    | Down's syndrome                                                                                                                                                                                                                                                     | *down*                                                                                                     |
|                                                                                                                                                                                                                                                                                    |                                                                                                                                                                                                                                                                     | *trisom*                                                                                                   |
|                                                                                                                                                                                                                                                                                    |                                                                                                                                                                                                                                                                     | *mongol*                                                                                                   |
| Diabetes mellitus<br>(Type I or Type II)                                                                                                                                                                                                                                           | Type I                                                                                                                                                                                                                                                              | *type 1 dia*                                                                                               |
|                                                                                                                                                                                                                                                                                    |                                                                                                                                                                                                                                                                     | *type I dia*                                                                                               |
|                                                                                                                                                                                                                                                                                    |                                                                                                                                                                                                                                                                     | *diabetes mellitus juv*                                                                                    |
|                                                                                                                                                                                                                                                                                    |                                                                                                                                                                                                                                                                     | *diabetes mellitus                                                                                         |
|                                                                                                                                                                                                                                                                                    |                                                                                                                                                                                                                                                                     | *insulin dep*                                                                                              |
|                                                                                                                                                                                                                                                                                    |                                                                                                                                                                                                                                                                     | *juvenile onset dia*                                                                                       |
|                                                                                                                                                                                                                                                                                    |                                                                                                                                                                                                                                                                     | *juvenile-onset dia*                                                                                       |
|                                                                                                                                                                                                                                                                                    |                                                                                                                                                                                                                                                                     | *juvenile-onset                                                                                            |
|                                                                                                                                                                                                                                                                                    |                                                                                                                                                                                                                                                                     | *diabetes mellitus type 1*                                                                                 |
|                                                                                                                                                                                                                                                                                    |                                                                                                                                                                                                                                                                     | *diabetes mellitus type I*                                                                                 |
|                                                                                                                                                                                                                                                                                    |                                                                                                                                                                                                                                                                     | *diabetes type 1*                                                                                          |
|                                                                                                                                                                                                                                                                                    |                                                                                                                                                                                                                                                                     | *diabetes type I*                                                                                          |
|                                                                                                                                                                                                                                                                                    | Type II                                                                                                                                                                                                                                                             | *type 2 dia*                                                                                               |
|                                                                                                                                                                                                                                                                                    |                                                                                                                                                                                                                                                                     | *type II dia*                                                                                              |
|                                                                                                                                                                                                                                                                                    |                                                                                                                                                                                                                                                                     | *adult onset dia*                                                                                          |
|                                                                                                                                                                                                                                                                                    |                                                                                                                                                                                                                                                                     | *adult-onset dia*                                                                                          |
|                                                                                                                                                                                                                                                                                    |                                                                                                                                                                                                                                                                     | *non-insulin dep*                                                                                          |
|                                                                                                                                                                                                                                                                                    |                                                                                                                                                                                                                                                                     | *noninsulin dep*                                                                                           |
|                                                                                                                                                                                                                                                                                    |                                                                                                                                                                                                                                                                     | *non-insulin-dep*                                                                                          |
|                                                                                                                                                                                                                                                                                    |                                                                                                                                                                                                                                                                     | *NIDDM*                                                                                                    |
|                                                                                                                                                                                                                                                                                    |                                                                                                                                                                                                                                                                     | *T2D*                                                                                                      |
|                                                                                                                                                                                                                                                                                    |                                                                                                                                                                                                                                                                     | *diabetes type 2*                                                                                          |
|                                                                                                                                                                                                                                                                                    |                                                                                                                                                                                                                                                                     | *diabetes mellitus type 2*                                                                                 |
|                                                                                                                                                                                                                                                                                    |                                                                                                                                                                                                                                                                     | *diabetes type II*                                                                                         |
|                                                                                                                                                                                                                                                                                    |                                                                                                                                                                                                                                                                     | *diabetes mellitus type II*                                                                                |
|                                                                                                                                                                                                                                                                                    |                                                                                                                                                                                                                                                                     | type 2*                                                                                                    |
|                                                                                                                                                                                                                                                                                    |                                                                                                                                                                                                                                                                     | type II*                                                                                                   |
|                                                                                                                                                                                                                                                                                    |                                                                                                                                                                                                                                                                     | *diabetes mellitus adult*                                                                                  |
| Immunosuppression:<br>primary (e.g.,<br>inherited immune<br>disorders resulting<br>from genetic<br>mutations, usually<br>present at birth and<br>diagnosed in<br>childhood) or<br>secondary due to<br>disease or treatment<br>(e.g., sickle cell, HIV,<br>cancer,<br>chemotherapy) | Forbes, H (2020). Therapy Code List - Immunosuppression Aurum Therapy Codes. [Data Collection]. London School of Hygiene & Tropical Medicine, London, United Kingdom. <a href="https://doi.org/10.17037/DATA.00001589">https://doi.org/10.17037/DATA.00001589</a> . | We filtered among therapy codes for moderate immunosuppression for those drugs classified as chemotherapy. |

ANDERSEN ET AL (2023)

## PERSONS DIAGNOSED WITH COVID IN ENGLAND IN THE CPRD: A COHORT DESCRIPTION

|    |                       |                                                                                                      |                            |
|----|-----------------------|------------------------------------------------------------------------------------------------------|----------------------------|
| 1  |                       |                                                                                                      |                            |
| 2  |                       |                                                                                                      |                            |
| 3  | Solid organ, bone     | Forbes, H (2020). Clinical Code List - Moderate Immunosuppression OPCS Codes.                        |                            |
| 4  | marrow and stem cell  | [Data Collection]. London School of Hygiene & Tropical Medicine, London, United                      |                            |
| 5  | transplant recipients | Kingdom. <a href="https://doi.org/10.17037/DATA.00001587">https://doi.org/10.17037/DATA.00001587</a> |                            |
| 6  |                       | Any transplant                                                                                       | *transplant*               |
| 7  |                       | Solid organ transplant                                                                               | *organ* *recipient*        |
| 8  |                       |                                                                                                      | *heart* *recipient*        |
| 9  |                       |                                                                                                      | *lung* *recipient*         |
| 10 |                       |                                                                                                      | *pancreas* *recipient*     |
| 11 |                       |                                                                                                      | *kidney* *recipient*       |
| 12 |                       |                                                                                                      | *intestine* *recipient*    |
| 13 |                       |                                                                                                      | *gland* *recipient*        |
| 14 |                       |                                                                                                      | *stomach* *recipient*      |
| 15 |                       |                                                                                                      | *spleen* *recipient*       |
| 16 |                       |                                                                                                      | *liver* *recipient*        |
| 17 |                       |                                                                                                      | *bladder* *recipient*      |
| 18 |                       | Bone marrow transplant                                                                               | *marrow* *graft*           |
| 19 |                       |                                                                                                      | *graft* *marrow*           |
| 20 |                       | Stem cell transplant                                                                                 | *stem* *transplant*        |
| 21 |                       |                                                                                                      | *transplant* *stem*        |
| 22 |                       |                                                                                                      | *stem* graft*              |
| 23 |                       |                                                                                                      | *graft* *stem*             |
| 24 |                       |                                                                                                      | *obes*                     |
| 25 | Morbid obesity (BMI   |                                                                                                      | *BMI*                      |
| 26 | > 35)                 |                                                                                                      |                            |
| 27 | Severe mental illness | Severe mental illness,                                                                               | *severe* *ment*            |
| 28 |                       | unspecified                                                                                          | *acute* *ment*             |
| 29 |                       |                                                                                                      | *severe* *psy*             |
| 30 |                       |                                                                                                      | *acute* *psy*              |
| 31 |                       |                                                                                                      | *nervous break*            |
| 32 |                       | Schizophrenia                                                                                        | *schiz*                    |
| 33 |                       |                                                                                                      | *psycot*                   |
| 34 |                       |                                                                                                      | *psychosis*                |
| 35 |                       |                                                                                                      | *mania*                    |
| 36 |                       |                                                                                                      | mania*                     |
| 37 |                       |                                                                                                      | *manic*                    |
| 38 |                       | Bipolar disorder                                                                                     | *bipo*                     |
| 39 |                       | Self-harm                                                                                            | *self harm*                |
| 40 |                       |                                                                                                      | *cutt*                     |
| 41 |                       |                                                                                                      | *self* *in*                |
| 42 |                       |                                                                                                      | *self-i*                   |
| 43 |                       |                                                                                                      | *self-h*                   |
| 44 |                       | Obsessive-compulsive disorder                                                                        | *OCD*                      |
| 45 |                       |                                                                                                      | *obsess*                   |
| 46 |                       | Eating disorder                                                                                      | *anor*                     |
| 47 |                       |                                                                                                      | *bulimia*                  |
| 48 |                       |                                                                                                      | *eating dis*               |
| 49 |                       | Medicines for severe mental                                                                          | Agomelatine                |
| 50 |                       | illness                                                                                              | Amoxapine                  |
| 51 |                       |                                                                                                      | Clomipramine hydrochloride |
| 52 |                       |                                                                                                      | Dosulepin hydrochloride    |
| 53 |                       |                                                                                                      | Doxepin hydrochloride      |
| 54 |                       |                                                                                                      | Imipramine hydrochloride   |
| 55 |                       |                                                                                                      |                            |
| 56 |                       |                                                                                                      |                            |
| 57 |                       |                                                                                                      |                            |
| 58 |                       |                                                                                                      |                            |
| 59 |                       |                                                                                                      |                            |
| 60 |                       |                                                                                                      |                            |

ANDERSEN ET AL (2023)

PERSONS DIAGNOSED WITH COVID IN ENGLAND IN THE CPRD: A COHORT DESCRIPTION

---

|    |  |                           |
|----|--|---------------------------|
| 3  |  | Isocarboxazid             |
| 4  |  | Lofepamine hydrochloride  |
| 5  |  | Loxapine succinate        |
| 6  |  | Moclobemide               |
| 7  |  | Nefazodone hydrochloride  |
| 8  |  | Phenelzine sulfate        |
| 9  |  | Reboxetine mesilate       |
| 10 |  | Tranlycypromine sulfate   |
| 11 |  | Trazodone hydrochloride   |
| 12 |  | Trimipramine maleate      |
| 13 |  | Venlafaxine hydrochloride |
| 14 |  | Vortioxetine hydrobromide |

17 Community and care  
18 home resident

\*nursing home\*  
\*home\* \*nursing\*  
\*care\* \*home\*  
\*home\* \*care\*  
\*residen\* \*care\*  
\*care\* \*resident\*

23 Judged by recruiting  
24 medically qualified  
25 professional,  
26 research nurse,  
27 nurse prescriber,  
28 prescribing  
29 pharmacist,  
30 dependent on the ISA  
31 for the specific IMP  
32 involved, to be  
33 clinically vulnerable

---

Unable to define, given nature of secondary database research.

ANDERSEN ET AL (2023)

PERSONS DIAGNOSED WITH COVID IN ENGLAND IN THE CPRD: A COHORT DESCRIPTION

**eTable 5: Search Terms for UK Health Security Agency Clinical Risk Group Definition**

| Classification as written in Green Book                                | Concept as written in Green Book                                                                                                                                       | Search terms                                                                                                                                                                                                                                                                                                |
|------------------------------------------------------------------------|------------------------------------------------------------------------------------------------------------------------------------------------------------------------|-------------------------------------------------------------------------------------------------------------------------------------------------------------------------------------------------------------------------------------------------------------------------------------------------------------|
| Chronic respiratory disease – individuals with a severe lung condition | Poorly controlled asthma                                                                                                                                               | Asthma with an oral corticosteroid use in the past 24 months                                                                                                                                                                                                                                                |
|                                                                        | Chronic obstructive pulmonary disease (COPD), including chronic bronchitis and emphysema                                                                               | Davidson, J, Warren-Gash, C and Mcdonald, H (2021). Clinical codelist - CPRD Aurum - chronic respiratory disease. [Data Collection]. London School of Hygiene & Tropical Medicine, London, United Kingdom.<br><a href="https://doi.org/10.17037/DATA.00002214">https://doi.org/10.17037/DATA.00002214</a> . |
|                                                                        | Bronchiectasis                                                                                                                                                         | *bronchiec*                                                                                                                                                                                                                                                                                                 |
|                                                                        | Cystic fibrosis                                                                                                                                                        | Davidson, J, Warren-Gash, C and Mcdonald, H (2021). Clinical codelist - CPRD Aurum - chronic respiratory disease. [Data Collection]. London School of Hygiene & Tropical Medicine, London, United Kingdom.<br><a href="https://doi.org/10.17037/DATA.00002214">https://doi.org/10.17037/DATA.00002214</a> . |
|                                                                        | Interstitial lung fibrosis                                                                                                                                             | *pulmon* *fibros*<br>*lung* *fibros*<br>*fibros* *lung*<br>*ipf*                                                                                                                                                                                                                                            |
| Chronic heart disease and vascular disease                             | Pneumoconiosis                                                                                                                                                         | *pneumocon*<br>*asbestosis*<br>*silicos*                                                                                                                                                                                                                                                                    |
|                                                                        | Bronchopulmonary dysplasia (BPD)                                                                                                                                       | *broncho* *dysplas*<br>*BDP*                                                                                                                                                                                                                                                                                |
|                                                                        | Congenital heart disease                                                                                                                                               | *congen* *hear*<br>*congen* *card*<br>*CHD*                                                                                                                                                                                                                                                                 |
| Chronic heart failure                                                  | Hypertension with cardiac complications                                                                                                                                | *hyperten*<br>*high* *blood* *pres*<br>* bp *<br>*bp*<br>*HBP*<br>*HTN*                                                                                                                                                                                                                                     |
|                                                                        | Individuals requiring regular medication and/or follow-up for ischaemic heart disease (includes individuals with atrial fibrillation, peripheral vascular disease or a | *CCF*<br>*CHF*<br>*hear* *fail*<br>*card* *fail*<br>*hear* *diseas*<br>*artero* *diseas*<br>*vasc* *diseas*<br>*CAD*<br>*ihd*<br>*myocard*<br>*isch*                                                                                                                                                        |

ANDERSEN ET AL (2023)

PERSONS DIAGNOSED WITH COVID IN ENGLAND IN THE CPRD: A COHORT DESCRIPTION

|                        |                                              |                                                                                                                                                                                                                                                                                                                                                                                                                                                        |
|------------------------|----------------------------------------------|--------------------------------------------------------------------------------------------------------------------------------------------------------------------------------------------------------------------------------------------------------------------------------------------------------------------------------------------------------------------------------------------------------------------------------------------------------|
|                        | history of venous thromboembolism)           | *chd*<br>*fibrilla*<br>*afib*<br>*VTE*<br>*thrombo*<br>*DVT*<br>*blood* *clot*<br>*pulmon* *embolis*<br>* pe *                                                                                                                                                                                                                                                                                                                                         |
| Chronic kidney disease | At stage 3, 4 or 5<br>Chronic kidney failure | *CKD*<br>*renal* *disease*<br>*renal* *failure*<br>*renal* *insufficiency*<br>*renal* *disorder*<br>*kidney* *disease*<br>*kidney* *disorder*<br>*kidney* *failure*<br>*eGFR*<br>*estimated* *glomerular* *filtration* *rate*<br>*disease* *renal*<br>*failure* *renal*<br>*insufficiency* *renal*<br>*disorder* *renal*<br>*disease* *kidney*<br>*disorder* *kidney*<br>*failure* *kidney*                                                            |
|                        | Nephrotic syndrome                           | *nephro*                                                                                                                                                                                                                                                                                                                                                                                                                                               |
|                        | Kidney transplantation                       | Davidson, J, Warren-Gash, C, Mcdonald, H, Evans, D and Clay, S (2021). Clinical codelist - chronic kidney disease. [Data Collection]. London School of Hygiene & Tropical Medicine, London, United Kingdom.<br><a href="https://doi.org/10.17037/DATA.00002406">https://doi.org/10.17037/DATA.00002406</a> .                                                                                                                                           |
|                        |                                              | We selected transplant-specific codes.                                                                                                                                                                                                                                                                                                                                                                                                                 |
| Chronic liver disease  | Chronic hepatitis                            | *chron* *hepat* <sup>1</sup><br>*hepat* *chron* <sup>1</sup><br>*acute* *yellow* *atroph* <sup>1</sup><br>*hepat* *notif* <sup>1</sup><br>*granul* *hepat* <sup>1</sup><br>*alpha* *hepat* <sup>1</sup><br>*hepat* *tox* <sup>1</sup><br>*toxop* *hepat* <sup>1</sup><br>*acute hepatitis c* <sup>1</sup><br>*alcoh* *hepat* <sup>1</sup><br>*subacute* *hepat* <sup>1</sup><br>*nonspec* *hepat* <sup>1</sup><br>*nonalco* *liver* *dis* <sup>1</sup> |

ANDERSEN ET AL (2023)

PERSONS DIAGNOSED WITH COVID IN ENGLAND IN THE CPRD: A COHORT DESCRIPTION

|                              |                                                                                                                                          |                                       |
|------------------------------|------------------------------------------------------------------------------------------------------------------------------------------|---------------------------------------|
|                              |                                                                                                                                          | *hepat* *malaria* <sup>1</sup>        |
|                              |                                                                                                                                          | *malaria* *hepat* <sup>1</sup>        |
|                              |                                                                                                                                          | *autoimm* *hepat* <sup>1</sup>        |
|                              |                                                                                                                                          | *hepatitis c without* <sup>1</sup>    |
|                              |                                                                                                                                          | *toxic* *hepat* <sup>1</sup>          |
|                              |                                                                                                                                          | *hepatitis C* <sup>1</sup>            |
|                              |                                                                                                                                          | *sequelae* *viral* *hep* <sup>1</sup> |
|                              |                                                                                                                                          | *chron* *liver* *dis* <sup>1</sup>    |
|                              |                                                                                                                                          | *oesoph* *varices* <sup>1</sup>       |
|                              |                                                                                                                                          | *varices* *oesoph* <sup>1</sup>       |
|                              |                                                                                                                                          | *hepat* *coma* <sup>1</sup>           |
|                              |                                                                                                                                          | **coma* *hepat* <sup>1</sup>          |
|                              |                                                                                                                                          | *enceph* *hepat* <sup>1</sup>         |
|                              |                                                                                                                                          | hepat* *enceph* <sup>1</sup>          |
|                              |                                                                                                                                          | *sequelae* *liver* <sup>1</sup>       |
|                              |                                                                                                                                          | *liver* *sequelae* <sup>1</sup>       |
|                              |                                                                                                                                          | *portal* *hyperten* <sup>1</sup>      |
|                              |                                                                                                                                          | *hepatoren* *syndro* <sup>1</sup>     |
|                              |                                                                                                                                          | *syndro* *hepatoren* <sup>1</sup>     |
|                              |                                                                                                                                          | *oesophag* *varices* <sup>1</sup>     |
|                              | Cirrhosis                                                                                                                                | *cirrhos* <sup>1</sup>                |
|                              | Biliary atresia                                                                                                                          | *biliary c* <sup>1</sup>              |
|                              |                                                                                                                                          | *destructive* *chol* <sup>1</sup>     |
|                              |                                                                                                                                          | *sclero* *cholangit* <sup>1</sup>     |
|                              |                                                                                                                                          | *recurr* *cholangit* <sup>1</sup>     |
|                              |                                                                                                                                          | *chron* *cholangit* <sup>1</sup>      |
| Chronic neurological disease | Stroke                                                                                                                                   | *stroke* <sup>1</sup>                 |
|                              |                                                                                                                                          | *cerebr* *infarc* <sup>1</sup>        |
|                              |                                                                                                                                          | *cerebr* *acc* <sup>1</sup>           |
|                              |                                                                                                                                          | *CVA* <sup>1</sup>                    |
|                              | Transient ischaemic attack (TIA)                                                                                                         | *tran* *ischemic* <sup>1</sup>        |
|                              | Conditions in which respiratory function may be compromised due to neurological or neuromuscular disease (e.g. polio syndrome sufferers) | *polio* <sup>1</sup>                  |
|                              |                                                                                                                                          | *infant* *parlay* <sup>1</sup>        |
|                              |                                                                                                                                          | *heine* *dis* <sup>1</sup>            |
|                              | Cerebral palsy                                                                                                                           | *cereb* *palsy* <sup>1</sup>          |
|                              |                                                                                                                                          | *cereb palsy* <sup>1</sup>            |
|                              |                                                                                                                                          | *cp* <sup>1</sup>                     |
|                              | Severe or profound and multiple learning disabilities (PMLD) including all those on the learning disability register                     | *learning* *dis* <sup>1</sup>         |
|                              |                                                                                                                                          | *learning* *diff* <sup>1</sup>        |
|                              |                                                                                                                                          | *retard* <sup>1</sup>                 |
|                              |                                                                                                                                          | *angelman* <sup>1</sup>               |
|                              |                                                                                                                                          | *Coffin-lowry* <sup>1</sup>           |
|                              |                                                                                                                                          | *cornelia* *lange* <sup>1</sup>       |
|                              |                                                                                                                                          | *cri du chat* <sup>1</sup>            |
|                              |                                                                                                                                          | *5p Deletion* <sup>1</sup>            |

ANDERSEN ET AL (2023)

PERSONS DIAGNOSED WITH COVID IN ENGLAND IN THE CPRD: A COHORT DESCRIPTION

|    |                           |                            |                                             |
|----|---------------------------|----------------------------|---------------------------------------------|
| 3  |                           |                            | *cat* *cry*                                 |
| 4  |                           |                            | *dubowitz*                                  |
| 5  |                           |                            | *edwards* *synd*                            |
| 6  |                           |                            | *Trisomy* *18*                              |
| 7  |                           |                            | *hurler*                                    |
| 8  |                           |                            | *mucopolysacc*                              |
| 9  |                           |                            | *laurence-moon*                             |
| 10 |                           |                            | *Mowat-Wilson*                              |
| 11 |                           |                            | *Patau*                                     |
| 12 |                           |                            | *Trisomy* *13*                              |
| 13 |                           |                            | *rett *                                     |
| 14 |                           |                            | *Smith-Magenis*                             |
| 15 |                           |                            | *Chromosome* *deletion*                     |
| 16 |                           |                            | *wolf* *Hirs*                               |
| 17 |                           |                            | *down*                                      |
| 18 |                           | Down's syndrome            | *trisomy*                                   |
| 19 |                           |                            | *mongol*                                    |
| 20 |                           | Multiple sclerosis         | *multiple sclerosis*                        |
| 21 |                           |                            | *sclerosis multiple*                        |
| 22 |                           |                            | *encephalomyelit* *disseminat*              |
| 23 |                           |                            | *ms*                                        |
| 24 |                           | Epilepsy                   | *epilep*                                    |
| 25 |                           | Dementia                   | *demen*                                     |
| 26 |                           |                            | *senil*                                     |
| 27 |                           | Parkinson's disease        | *parkinson*                                 |
| 28 |                           |                            | *hypo* *rigid*                              |
| 29 |                           |                            | *parlay* *agit*                             |
| 30 |                           |                            | *shak* *pals*                               |
| 31 |                           |                            | * pd *                                      |
| 32 |                           | Motor neurone disease      | *motor* *neurone* *disease*                 |
| 33 |                           | and related or similar     | *kennedy*                                   |
| 34 |                           | conditions, hereditary and | *amyotrophic* *lateral* *sclerosis*         |
| 35 |                           | degenerative disease of    | *ALS*                                       |
| 36 |                           | the nervous system or      | *primary* *lateral* *sclerosis*             |
| 37 |                           | muscles, severe            | *progressive* *bulbar* *palsy*              |
| 38 |                           | neurological disability    | *progressive* *spinal* *muscular* *atrophy* |
| 39 |                           |                            | *myo*                                       |
| 40 |                           |                            |                                             |
| 41 |                           |                            |                                             |
| 42 |                           |                            |                                             |
| 43 | Diabetes mellitus and     | Type I                     | *type 1 dia*                                |
| 44 | other endocrine disorders |                            | *type I dia*                                |
| 45 |                           |                            | *diabetes mellitus juv*                     |
| 46 |                           |                            | *diabetes mellitus                          |
| 47 |                           |                            | *insulin dep*                               |
| 48 |                           |                            | *juvenile onset dia*                        |
| 49 |                           |                            | *juvenile-onset dia*                        |
| 50 |                           |                            | *juvenile-onset                             |
| 51 |                           |                            | *diabetes mellitus type 1*                  |
| 52 |                           |                            | *diabetes mellitus type I*                  |
| 53 |                           |                            | *diabetes type 1*                           |
| 54 |                           |                            | *diabetes type I*                           |
| 55 |                           |                            | *diabetes type I*                           |
| 56 |                           | Type II                    | *type 2 dia*                                |

ANDERSEN ET AL (2023)

## PERSONS DIAGNOSED WITH COVID IN ENGLAND IN THE CPRD: A COHORT DESCRIPTION

|                                               |                                                               |                                                                                                                                                                                                                                                                                                                                                                                                                        |
|-----------------------------------------------|---------------------------------------------------------------|------------------------------------------------------------------------------------------------------------------------------------------------------------------------------------------------------------------------------------------------------------------------------------------------------------------------------------------------------------------------------------------------------------------------|
|                                               |                                                               | *type II dia*                                                                                                                                                                                                                                                                                                                                                                                                          |
|                                               |                                                               | *adult onset dia*                                                                                                                                                                                                                                                                                                                                                                                                      |
|                                               |                                                               | *adult-onset dia*                                                                                                                                                                                                                                                                                                                                                                                                      |
|                                               |                                                               | *non-insulin dep*                                                                                                                                                                                                                                                                                                                                                                                                      |
|                                               |                                                               | *noninsulin dep*                                                                                                                                                                                                                                                                                                                                                                                                       |
|                                               |                                                               | *non-insulin-dep*                                                                                                                                                                                                                                                                                                                                                                                                      |
|                                               |                                                               | *NIDDM*                                                                                                                                                                                                                                                                                                                                                                                                                |
|                                               |                                                               | *T2D*                                                                                                                                                                                                                                                                                                                                                                                                                  |
|                                               |                                                               | *diabetes type 2*                                                                                                                                                                                                                                                                                                                                                                                                      |
|                                               |                                                               | *diabetes mellitus type 2*                                                                                                                                                                                                                                                                                                                                                                                             |
|                                               |                                                               | *diabetes type II*                                                                                                                                                                                                                                                                                                                                                                                                     |
|                                               |                                                               | *diabetes mellitus type II*                                                                                                                                                                                                                                                                                                                                                                                            |
|                                               |                                                               | type 2*                                                                                                                                                                                                                                                                                                                                                                                                                |
|                                               |                                                               | type II*                                                                                                                                                                                                                                                                                                                                                                                                               |
|                                               |                                                               | *diabetes mellitus adult*                                                                                                                                                                                                                                                                                                                                                                                              |
|                                               | Addison's disease                                             | *Addison*                                                                                                                                                                                                                                                                                                                                                                                                              |
|                                               |                                                               | *adren* *insuff*                                                                                                                                                                                                                                                                                                                                                                                                       |
|                                               |                                                               | *hypocort*                                                                                                                                                                                                                                                                                                                                                                                                             |
|                                               |                                                               | *hypoadren*                                                                                                                                                                                                                                                                                                                                                                                                            |
| Immunosuppression due to disease or treatment | Patients undergoing chemotherapy leading to immunosuppression | Forbes, H (2020). Therapy Code List - Immunosuppression Aurum Therapy Codes. [Data Collection]. London School of Hygiene & Tropical Medicine, London, United Kingdom.<br><a href="https://doi.org/10.17037/DATA.00001589">https://doi.org/10.17037/DATA.00001589</a> .                                                                                                                                                 |
|                                               | Patients undergoing radical radiotherapy                      | We filtered among therapy codes for moderate immunosuppression for those drugs classified as chemotherapy. Davidson, J, Warren-Gash, C and Mcdonald, H (2021). Clinical codelist - CPRD Aurum - Immuosuppressive conditions. [Data Collection]. London School of Hygiene & Tropical Medicine, London, United Kingdom.<br><a href="https://doi.org/10.17037/DATA.00002234">https://doi.org/10.17037/DATA.00002234</a> . |
|                                               | Solid organ transplant recipients                             | We filtered for radiotherapy-specific codes.<br>*transplant*<br>*organ* *recipient*<br>*heart* *recipient*<br>*lung* *recipient*<br>*pancreas* *recipient*<br>*kidney* *recipient*<br>*intestine* *recipient*<br>*gland* *recipient*<br>*stomach* *recipient*<br>*spleen* *recipient*<br>*liver* *recipient*<br>*bladder* *recipient*                                                                                  |



ANDERSEN ET AL (2023)

## PERSONS DIAGNOSED WITH COVID IN ENGLAND IN THE CPRD: A COHORT DESCRIPTION

|                                                                                                                                                                                                                                                                                                                                             |                                                                                                                                                                                                                                                                                                                                                                                                                                         |
|---------------------------------------------------------------------------------------------------------------------------------------------------------------------------------------------------------------------------------------------------------------------------------------------------------------------------------------------|-----------------------------------------------------------------------------------------------------------------------------------------------------------------------------------------------------------------------------------------------------------------------------------------------------------------------------------------------------------------------------------------------------------------------------------------|
| Bone marrow or stem cell transplant recipients                                                                                                                                                                                                                                                                                              | LSHTM - Forbes, H (2020). Clinical Code List - Moderate Immunosuppression OPCS Codes. [Data Collection]. London School of Hygiene & Tropical Medicine, London, United Kingdom.<br><a href="https://doi.org/10.17037/DATA.00001587">https://doi.org/10.17037/DATA.00001587</a> .                                                                                                                                                         |
| HIV infection at all stages                                                                                                                                                                                                                                                                                                                 | *HIV*<br>*immunodeficiency vir*                                                                                                                                                                                                                                                                                                                                                                                                         |
| Multiple myeloma or genetic disorders affecting the immune system (e.g. IRAK-4, NEMO, complement disorder, SCID)                                                                                                                                                                                                                            | *myelom*<br>*kahler*<br>*NEMO*<br>*nuclear* *fact*<br>*IKBKG* *mut*<br>*NFKB*<br>*complement*<br>*SCID*<br>*combin* *immune*<br>*alympho*<br>*glanz* *synd*<br>*immunodef* *synd*                                                                                                                                                                                                                                                       |
| Individuals who are receiving immunosuppressive or immunomodulating biological therapy including, but not limited to, anti-TNF, alemtuzumab, ofatumumab, rituximab, patients receiving protein kinase inhibitors or PARP inhibitors, and individuals treated with steroid sparing agents such as cyclophosphamide and mycophenolate mofetil | Adalimumab<br>Etanercept<br>Infliximab<br>Golimumab<br>Certolizumab pegol<br>Abatacept<br>Olaparib<br>Rucaparib<br>Niraparib<br>Afatinib<br>Axitinib<br>Bosutinib<br>Cetuximab<br>Cobimetinib<br>Crizotinib<br>Cabozantinib<br>Dacomitinib<br>Dasatinib<br>Entrectinib<br>Erlotinib<br>Fostamatinib<br>Gefitinib<br>Ibrutinib<br>Imatinib<br>Lapatinib<br>Nilotinib<br>Paxopanib<br>Pegaptanib<br>Ruxolitinib<br>Sorafenib<br>Sunitinib |

ANDERSEN ET AL (2023)

## PERSONS DIAGNOSED WITH COVID IN ENGLAND IN THE CPRD: A COHORT DESCRIPTION

|                                                                                                      |                                                                                                                                                                                                             |                                                                                                                                  |
|------------------------------------------------------------------------------------------------------|-------------------------------------------------------------------------------------------------------------------------------------------------------------------------------------------------------------|----------------------------------------------------------------------------------------------------------------------------------|
|                                                                                                      |                                                                                                                                                                                                             | Vandetanib                                                                                                                       |
|                                                                                                      |                                                                                                                                                                                                             | Vemurafenib                                                                                                                      |
|                                                                                                      | Individuals treated with or likely to be treated with systemic steroids for more than a month at a dose equivalent to prednisolone at 20mg or more per day for adults                                       | Betamethasone<br>Cortisone<br>Dexamethasone<br>Hydrocortisone<br>Methylprednisolone<br>Prednisolone                              |
|                                                                                                      | Anyone with a history of haematological malignancy, including leukaemia, lymphoma, and myeloma                                                                                                              | *CMML*<br>*chronic myelom*<br>*lymph* *leuk*<br>*CLL*<br>*follic* *lymph*<br>* fl *                                              |
|                                                                                                      | Those who require long term immunosuppressive treatment for conditions including but not limited to: systemic lupus erythematosus, rheumatoid arthritis, inflammatory bowel disease, scleroderma, psoriasis | Using drugs listed above                                                                                                         |
| Asplenia or dysfunction of the spleen. This includes conditions that may lead to splenic dysfunction | Asplenia                                                                                                                                                                                                    | *asplen*<br>*heterotax*<br>*situs*<br>*ambig*<br>*sickl*<br>*SCD*<br>*thal*<br>*coelia*<br>*celia*<br>*sprue*<br>*glut* *entero* |
|                                                                                                      | Homozygous sickle cell disease                                                                                                                                                                              |                                                                                                                                  |
|                                                                                                      | Thalassemia major                                                                                                                                                                                           |                                                                                                                                  |
|                                                                                                      | Coeliac syndrome                                                                                                                                                                                            |                                                                                                                                  |
| Morbid obesity (adults with a BMI >40kg/m <sup>2</sup> )                                             | Obesity with specification of BMI >40kgm <sup>2</sup>                                                                                                                                                       | *obes*<br>*BMI*<br>Measured values using height and weight which calculate to >40 kgm <sup>2</sup>                               |
| Severe mental illness                                                                                | Schizophrenia                                                                                                                                                                                               | *schiz*<br>*psycot*<br>*psychosis*<br>* mania*<br>mania*<br>*manic*                                                              |
|                                                                                                      | Bipolar disorder                                                                                                                                                                                            | *bipo*<br>*severe* *ment*<br>*acute* *ment*                                                                                      |

ANDERSEN ET AL (2023)

## PERSONS DIAGNOSED WITH COVID IN ENGLAND IN THE CPRD: A COHORT DESCRIPTION

|                                                            |                                                             |                                                                                                                                                                                |
|------------------------------------------------------------|-------------------------------------------------------------|--------------------------------------------------------------------------------------------------------------------------------------------------------------------------------|
|                                                            | Any mental illness that causes severe functional impairment | *severe* *psy*<br>*acute* *psy*<br>*nervous break*<br>*self harm*<br>*cutt*<br>*self* *in*<br>*self-i*<br>*self-h*<br>*OCD*<br>*obsess*<br>*anor*<br>*bulimia*<br>*eating dis* |
| Pregnancy (all stages (first, second and third trimester)) | Pregnancy                                                   | *pregnan*<br>*trimest*                                                                                                                                                         |
|                                                            | End of pregnancy                                            | *gestat*<br>*birth*<br>*deliver*<br>*abortio*                                                                                                                                  |

ANDERSEN ET AL (2023)  
 PERSONS DIAGNOSED WITH COVID IN ENGLAND IN THE CPRD: A COHORT DESCRIPTION

**eTable 6: Cohort Attrition**

|                                                                                                                                                                                                                                                                                 | <b>Unique person ID's</b> |
|---------------------------------------------------------------------------------------------------------------------------------------------------------------------------------------------------------------------------------------------------------------------------------|---------------------------|
| Persons of any age diagnosed with COVID from August 1, 2020 through January 31, 2022 using the May 2022 CPRD Aurum data release.                                                                                                                                                | 2,631,267                 |
| Files of "acceptable research quality", as defined by CPRD.                                                                                                                                                                                                                     | 2,631,267                 |
| Continuously registered with CPRD GP practice for at least 365 days prior to COVID diagnosis, and did not have a registration end date, practice last collection date or death date prior to COVID diagnosis.                                                                   | 2,322,875                 |
| Hospital Episode Statistics (HES) Admitted Patient Care (APC) linkage eligible.                                                                                                                                                                                                 | 2,289,708                 |
| Once ONS data were received, 42 persons were noted that should have been excluded from the final cohort because ONS death data preceded index date.                                                                                                                             | 2,289,666                 |
| Excluded persons who were admitted to the hospital on or before their primary care recorded date of COVID diagnosis. Due to mandatory GP reporting guidelines, this may be lagged from the date of true test collection and therefore not accurately reflect date of diagnosis. | 2,271,072                 |

ANDERSEN ET AL (2023)

PERSONS DIAGNOSED WITH COVID IN ENGLAND IN THE CPRD: A COHORT DESCRIPTION

**eTable 7: Reference National Case Counts and Census Distributions for England**

|                            | All COVID Cases<br>(n = 20,386,786) | COVID Admissions<br>(n = 954,124) | Population of England<br>(n = 56,489,800) |
|----------------------------|-------------------------------------|-----------------------------------|-------------------------------------------|
| <b>Age groups in years</b> |                                     |                                   |                                           |
| 0-4                        | 454,587 (2%)                        | --                                | 3,077,000 (5%)                            |
| 5-9                        | 1,146,248 (6%)                      | --                                | 3,348,600 (6%)                            |
| 10-14                      | 1,626,090 (8%)                      | --                                | 3,413,100 (6%)                            |
| 15-19                      | 1,396,404 (7%)                      | --                                | 3,218,900 (6%)                            |
| 20-24                      | 1,567,499 (8%)                      | --                                | 3,414,400 (6%)                            |
| 25-29                      | 1,735,467 (9%)                      | --                                | 3,715,400 (7%)                            |
| 30-34                      | 1,795,926 (9%)                      | --                                | 3,952,600 (7%)                            |
| 35-39                      | 1,714,241 (8%)                      | --                                | 3,795,400 (7%)                            |
| 40-44                      | 1,637,287 (8%)                      | --                                | 3,580,400 (6%)                            |
| 45-49                      | 1,477,924 (7%)                      | --                                | 3,602,600 (6%)                            |
| 50-54                      | 1,431,931 (7%)                      | --                                | 3,907,700 (7%)                            |
| 55-59                      | 1,241,556 (6%)                      | --                                | 3,806,300 (7%)                            |
| 60-64                      | 929,614 (5%)                        | --                                | 3,256,100 (6%)                            |
| 65-69                      | 626,179 (3%)                        | --                                | 2,767,500 (5%)                            |
| 70-74                      | 523,000 (3%)                        | --                                | 2,796,600 (5%)                            |
| 75-79                      | 391,839 (2%)                        | --                                | 2,038,800 (4%)                            |
| 80-84                      | 277,529 (1%)                        | --                                | 1,427,900 (2%)                            |
| 85-89                      | 277,112 (1%)                        | --                                | 872,200 (2%)                              |
| 90+                        | 192,353 (1%)                        | --                                | 498,200 (< 1%)                            |
| 0-5                        | --                                  | 20,400 (2%)                       | --                                        |
| 6-17                       | --                                  | 13,942 (1%)                       | --                                        |
| 18-64                      | --                                  | 335,675 (35%)                     | --                                        |
| 65-84                      | --                                  | 379,584 (40%)                     | --                                        |
| 85+                        | --                                  | 199,497 (21%)                     | --                                        |
| Unknown                    | --                                  | 5,026 (1%)                        | --                                        |
| <b>Sex</b>                 |                                     |                                   |                                           |
| Male                       | 9,245,295 (45%)                     | --                                | 27,656,300 (49%)                          |
| Female                     | 11,141,491 (55%)                    | --                                | 28,833,500 (51%)                          |
| <b>Region</b>              |                                     |                                   |                                           |
| North East                 | 948,543 (5%)                        | --                                | 2,647,100 (5%)                            |
| North West                 | 2,582,413 (13%)                     | --                                | 7,417,300 (13%)                           |
| Yorkshire and The Humber   | 1,825,820 (9%)                      | --                                | 5,480,800 (10%)                           |
| East Midlands              | 1,623,157 (8%)                      | --                                | 4,880,200 (9%)                            |
| West Midlands              | 1,942,370 (10%)                     | --                                | 5,950,800 (11%)                           |
| East of England            | 2,101,467 (10%)                     | --                                | 6,334,500 (11%)                           |
| London                     | 2,914,578 (14%)                     | --                                | 8,799,800 (16%)                           |
| South East                 | 3,125,838 (15%)                     | --                                | 9,278,100 (16%)                           |
| South West                 | 1,834,854 (9%)                      | --                                | 5,701,200 (10%)                           |
| Unknown                    | 1,487,746 (7%)                      | --                                | --                                        |

Note: coronavirus.data.gov.uk no longer publishes case counts by age, sex or region at the day level. It was not possible to limit to the study period of August 1, 2020 – January 31, 2022, and therefore the results above reflect the figures as accessed on January 31, 2023 of the total number of cases since the start of the pandemic.

ANDERSEN ET AL (2023)

PERSONS DIAGNOSED WITH COVID IN ENGLAND IN THE CPRD: A COHORT DESCRIPTION

**eTable 8: Regional Distribution of CPRD COVID cohorts, CPRD Practices, COVID Cases and Population of England**

| Region                   | CPRD Aurum                               |                                       |                         | England                          |                             |
|--------------------------|------------------------------------------|---------------------------------------|-------------------------|----------------------------------|-----------------------------|
|                          | Primary Care COVID Cases (n = 2,257,907) | Hospitalized COVID Cases (n = 13,165) | All CPRD Aurum Patients | All COVID Cases (n = 20,386,786) | Population (n = 56,489,800) |
| North East               | 4%                                       | 4%                                    | 5%                      | 5%                               | 5%                          |
| North West               | 21%                                      | 22%                                   | 17%                     | 13%                              | 13%                         |
| Yorkshire and The Humber | 3%                                       | 3%                                    | 4%                      | 9%                               | 10%                         |
| East Midlands            | 2%                                       | 2%                                    | 3%                      | 8%                               | 9%                          |
| West Midlands            | 17%                                      | 16%                                   | 18%                     | 10%                              | 11%                         |
| East of England          | 4%                                       | 3%                                    | 5%                      | 10%                              | 11%                         |
| London                   | 19%                                      | 23%                                   | 16%                     | 14%                              | 16%                         |
| South East               | 20%                                      | 20%                                   | 20%                     | 15%                              | 16%                         |
| South West               | 10%                                      | 8%                                    | 14%                     | 9%                               | 10%                         |
| Unknown                  | < 1%                                     | 0                                     |                         | 7%                               | --                          |

All CPRD Aurum patients refers figures published in "Data resource profile: Clinical Practice Research Datalink (CPRD) Aurum" by Wolf et al (International Journal of Epidemiology 2019). We were unable to find more recent distributions by ONS region of all CPRD Aurum patients.

For all COVID cases, coronavirus.data.gov.uk no longer publishes case counts by region at the day level. It was not possible to limit to the study period of August 1, 2020 – January 31, 2022, and therefore the results above reflect the figures as accessed on January 31, 2023 of the total number of cases since the start of the pandemic.

For the population of England, we used ONS 2021 Census figures.

ANDERSEN ET AL (2023)

PERSONS DIAGNOSED WITH COVID IN ENGLAND IN THE CPRD: A COHORT DESCRIPTION

**eTable 9: Characteristics of Primary Care COVID Cases in CPRD Aurum, by High Risk Definitions**

|                                      | All (n =<br>2,257,907) | Meeting NHS<br>Highest Risk<br>Conditions<br>(n = 249,972) | Meeting<br>PANORAMIC<br>Criteria<br>(n = 691,593) | Meeting<br>UKHSA<br>Clinical Risk<br>(n = 225,051) |
|--------------------------------------|------------------------|------------------------------------------------------------|---------------------------------------------------|----------------------------------------------------|
| Cases meeting definition             | --                     | 11%                                                        | 31%                                               | 10%                                                |
| Age, mean (SD)                       | 34 (19)                | 53 (18)                                                    | 55 (15)                                           | 49 (21)                                            |
| Sex                                  |                        |                                                            |                                                   |                                                    |
| Male                                 | 1,046,275 (46%)        | 37%                                                        | 45%                                               | 42%                                                |
| Female                               | 1,211,592 (54%)        | 63%                                                        | 55%                                               | 58%                                                |
| Unknown                              | 40 (< 1%)              | < 1%                                                       | < 1%                                              | < 1%                                               |
| General Practitioner Practice Region |                        |                                                            |                                                   |                                                    |
| North East                           | 83,834 (4%)            | 12,776 (5%)                                                | 29,115 (4%)                                       | 9,678 (4%)                                         |
| North West                           | 471,195 (21%)          | 60,632 (23%)                                               | 157,317 (23%)                                     | 53,930 (24%)                                       |
| Yorkshire and The<br>Humber          | 71,429 (3%)            | 8,563 (3%)                                                 | 23,079 (3%)                                       | 7,532 (3%)                                         |
| East Midlands                        | 49,651 (2%)            | 5,472 (2%)                                                 | 14,001 (2%)                                       | 4,678 (2%)                                         |
| West Midlands                        | 377,125 (17%)          | 43,550 (17%)                                               | 118,027 (17%)                                     | 38,817 (17%)                                       |
| East of England                      | 95,139 (4%)            | 10,394 (4%)                                                | 28,546 (4%)                                       | 7,824 (3%)                                         |
| London                               | 424,908 (19%)          | 45,690 (18%)                                               | 118,663 (17%)                                     | 40,268 (18%)                                       |
| South East                           | 448,536 (20%)          | 45,430 (17%)                                               | 130,283 (19%)                                     | 38,808 (17%)                                       |
| South West                           | 235,785 (10%)          | 27,437 (11%)                                               | 72,473 (10%)                                      | 23,480 (10%)                                       |
| Unknown                              | 305 (< 1%)             | 28 (< 1%)                                                  | 89 (< 1%)                                         | 36 (< 1%)                                          |
| Non-immunocompromised                | 2,193,241<br>(100%)    | 218,912<br>(100%)                                          | 648,474<br>(100%)                                 | 196,621<br>(100%)                                  |
| Unvaccinated                         | 1,170,509 (53%)        | 82,484 (38%)                                               | 236,106 (36%)                                     | 96,498 (49%)                                       |
| 1 COVID vaccine dose                 | 173,853 (8%)           | 9,527 (4%)                                                 | 28,711 (5%)                                       | 12,469 (6%)                                        |
| 2 COVID vaccine doses                | 598,367 (27%)          | 73,907 (34%)                                               | 234,570 (36%)                                     | 54,869 (28%)                                       |
| First booster                        | 250,512 (12%)          | 52,994 (24%)                                               | 149,087 (23%)                                     | 32,785 (17%)                                       |
| Immunocompromised                    | 64,666<br>(100%)       | 41,060<br>(100%)                                           | 43,119<br>(100%)                                  | 28,430<br>(100%)                                   |
| Unvaccinated                         | 1,306 (2%)             | 832 (2%)                                                   | 791 (2%)                                          | 675 (2%)                                           |
| 1 COVID vaccine dose                 | 6,033 (9%)             | 3,556 (9%)                                                 | 3,105 (7%)                                        | 2,661 (9%)                                         |
| 2 COVID vaccine doses                | 33,953 (53%)           | 20,928 (51%)                                               | 21,636 (50%)                                      | 14,416 (51%)                                       |
| 3 COVID vaccine doses                | 23,108 (36%)           | 15,544 (38%)                                               | 17,388 (40%)                                      | 10,542 (37%)                                       |
| First booster                        | 266 (< 1%)             | 200 (< 1%)                                                 | 199 (< 1%)                                        | 136 (< 1%)                                         |

SD: standard deviation. Where necessary, to fulfill CPRD suppression rules of cells with 10 or fewer persons, categories are presented as percentages to prevent back-calculation.

ANDERSEN ET AL (2023)

PERSONS DIAGNOSED WITH COVID IN ENGLAND IN THE CPRD: A COHORT DESCRIPTION

**eTable 10: Characteristics of Hospitalized COVID Cases in CPRD Aurum-HES Linked Data, by High Risk Definitions**

|                                       | All<br>(n = 13,165) | Meeting NHS<br>Highest Risk<br>Conditions<br>(n = 4,333) | Meeting<br>PANORAMIC<br>Criteria<br>(n = 11,011) | Meeting<br>UKHSA<br>Clinical Risk<br>(n = 5,353) |
|---------------------------------------|---------------------|----------------------------------------------------------|--------------------------------------------------|--------------------------------------------------|
| Hospitalized cases meeting definition | --                  | 33%                                                      | 84%                                              | 41%                                              |
| Age, mean (SD)                        | 60 (16)             | 66 (14)                                                  | 65 (14)                                          | 66 (16)                                          |
| Sex                                   |                     |                                                          |                                                  |                                                  |
| Male                                  | 7,537 (57%)         | 2,242 (52%)                                              | 6,280 (57%)                                      | 2,804 (52%)                                      |
| Female                                | 5,628 (43%)         | 2,091 (48%)                                              | 4,731 (43%)                                      | 2,549 (48%)                                      |
| Unknown                               | 0                   | 0                                                        | 0                                                | 0                                                |
| General Practitioner Practice Region  |                     |                                                          |                                                  |                                                  |
| North East                            | 467 (4%)            | 172 (4%)                                                 | 397 (4%)                                         | 200 (4%)                                         |
| North West                            | 2,886 (22%)         | 962 (22%)                                                | 2,510 (23%)                                      | 1,263 (24%)                                      |
| Yorkshire and The Humber              | 340 (3%)            | 126 (3%)                                                 | 282 (3%)                                         | 156 (3%)                                         |
| East Midlands                         | 214 (2%)            | 73 (2%)                                                  | 182 (2%)                                         | 97 (2%)                                          |
| West Midlands                         | 2,065 (16%)         | 708 (16%)                                                | 1,739 (16%)                                      | 891 (17%)                                        |
| East of England                       | 414 (3%)            | 147 (3%)                                                 | 358 (3%)                                         | 175 (3%)                                         |
| London                                | 2,984 (23%)         | 943 (22%)                                                | 2,387 (22%)                                      | 1,105 (21%)                                      |
| South East                            | 2,682 (20%)         | 832 (19%)                                                | 2,235 (20%)                                      | 1,022 (19%)                                      |
| South West                            | 1,113 (8%)          | 370 (9%)                                                 | 921 (8%)                                         | 444 (8%)                                         |
| Unknown                               | 0                   | 0                                                        | 0                                                | 0                                                |
| Non-immunocompromised                 | 12,984              | 4,179                                                    | 10,832                                           | 5,208                                            |
| Unvaccinated                          | 12,744 (98%)        | 4,107 (98%)                                              | 10,602 (98%)                                     | 5,070 (97%)                                      |
| 1 COVID vaccine dose                  | 240 (2%)            | 72 (2%)                                                  | 230 (2%)                                         | 138 (3%)                                         |
| 2 COVID vaccine doses                 | 0                   | 0                                                        | 0                                                | 0                                                |
| First booster                         | 0                   | 0                                                        | 0                                                | 0                                                |
| Immunocompromised                     | 181                 | 154                                                      | 179                                              | 145                                              |
| Unvaccinated                          | 102 (56%)           | 89 (58%)                                                 | 100 (56%)                                        | 79 (54%)                                         |
| 1 COVID vaccine dose                  | 79 (44%)            | 65 (42%)                                                 | 79 (44%)                                         | 66 (46%)                                         |
| 2 COVID vaccine doses                 | 0                   | 0                                                        | 0                                                | 0                                                |
| 3 COVID vaccine doses                 | 0                   | 0                                                        | 0                                                | 0                                                |
| First booster                         | 0                   | 0                                                        | 0                                                | 0                                                |

SD: standard deviation.



ANDERSEN ET AL (2023)  
PERSONS DIAGNOSED WITH COVID IN ENGLAND IN THE CPRD: A COHORT DESCRIPTION

**eFigure 1: Date of Diagnosis for 2,271,072 COVID Cases in CPRD Aurum, By Care Setting, August 1, 2020 through January 31, 2022**

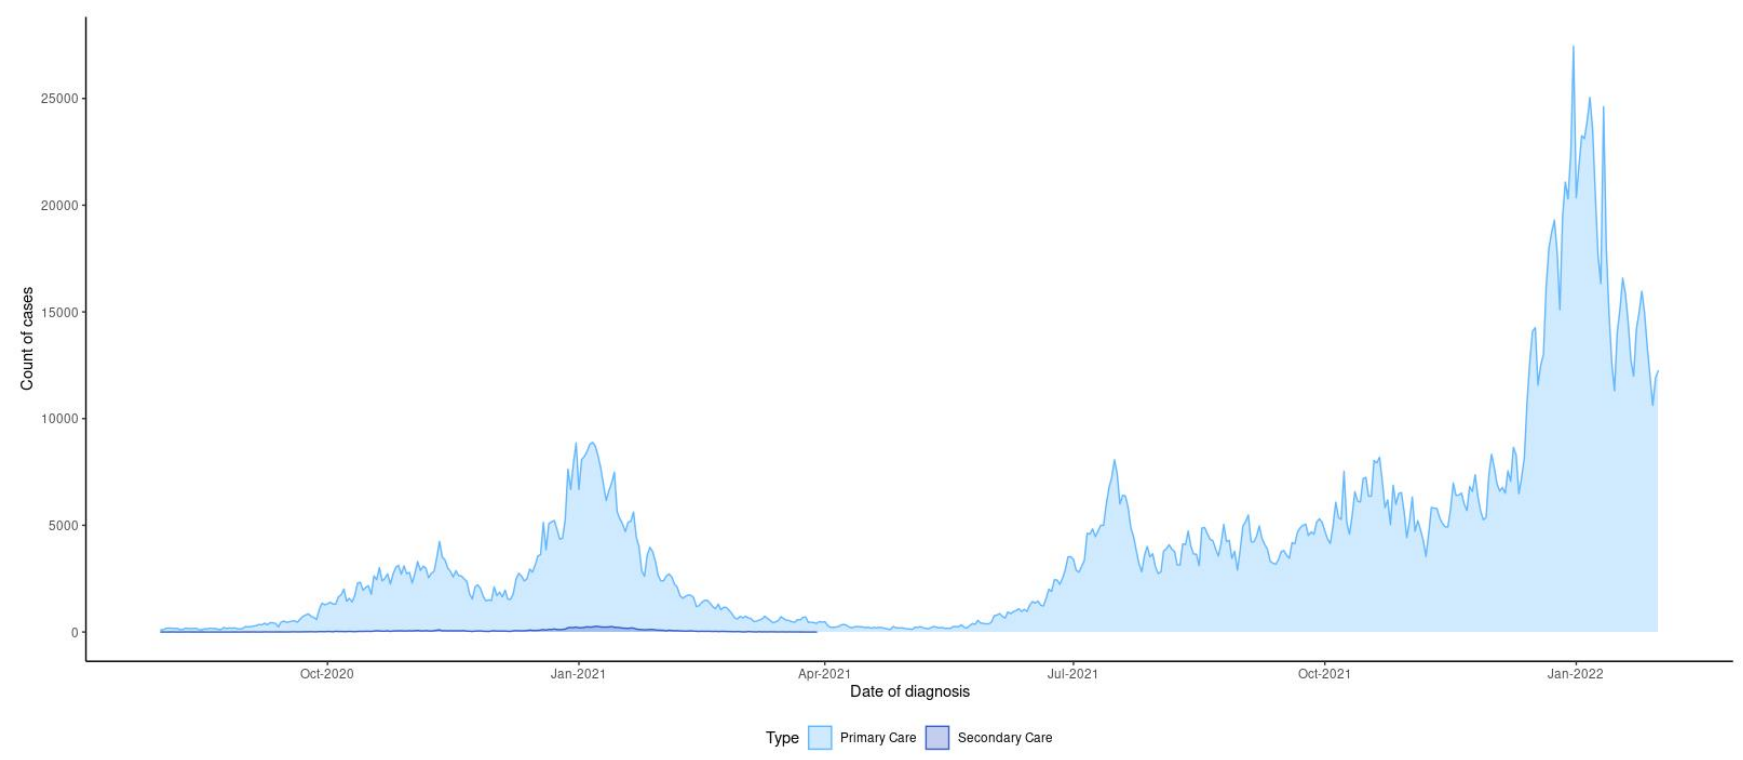

ANDERSEN ET AL (2023)

PERSONS DIAGNOSED WITH COVID IN ENGLAND IN THE CPRD: A COHORT DESCRIPTION

**eFigure 2: Date of Diagnosis for 2,257,907 Primary Care COVID Cases in CPRD Aurum, August 1, 2020 through January 31, 2022**

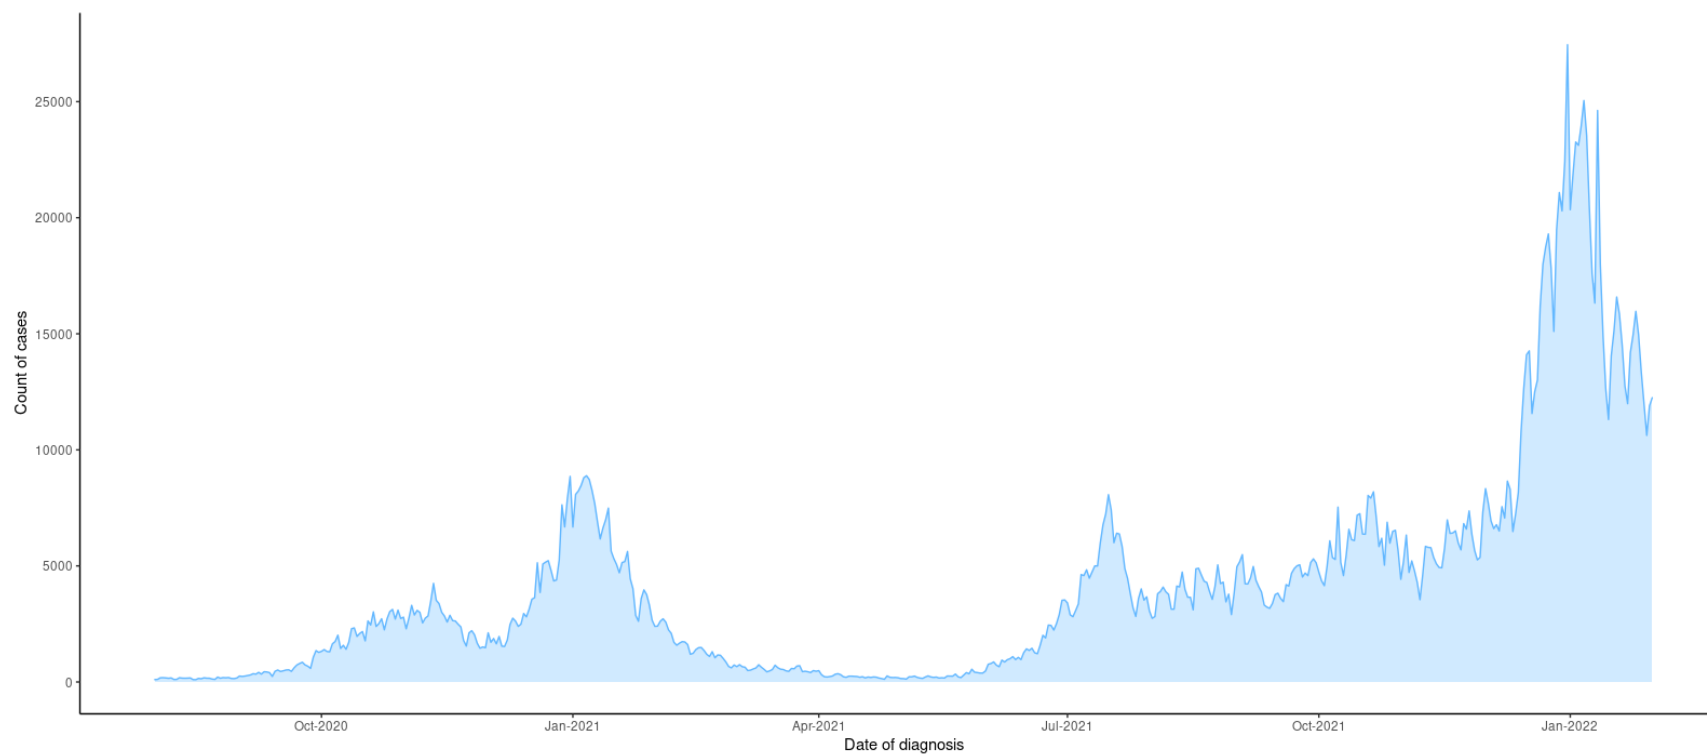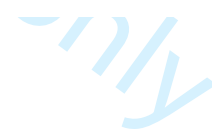

ANDERSEN ET AL (2023)

PERSONS DIAGNOSED WITH COVID IN ENGLAND IN THE CPRD: A COHORT DESCRIPTION

**eFigure 3: Date of Primary Care Recorded Diagnosis in CPRD Aurum-HES Linked Data for 13,165 Hospitalised COVID Cases, August 1, 2020 through March 31, 2021**

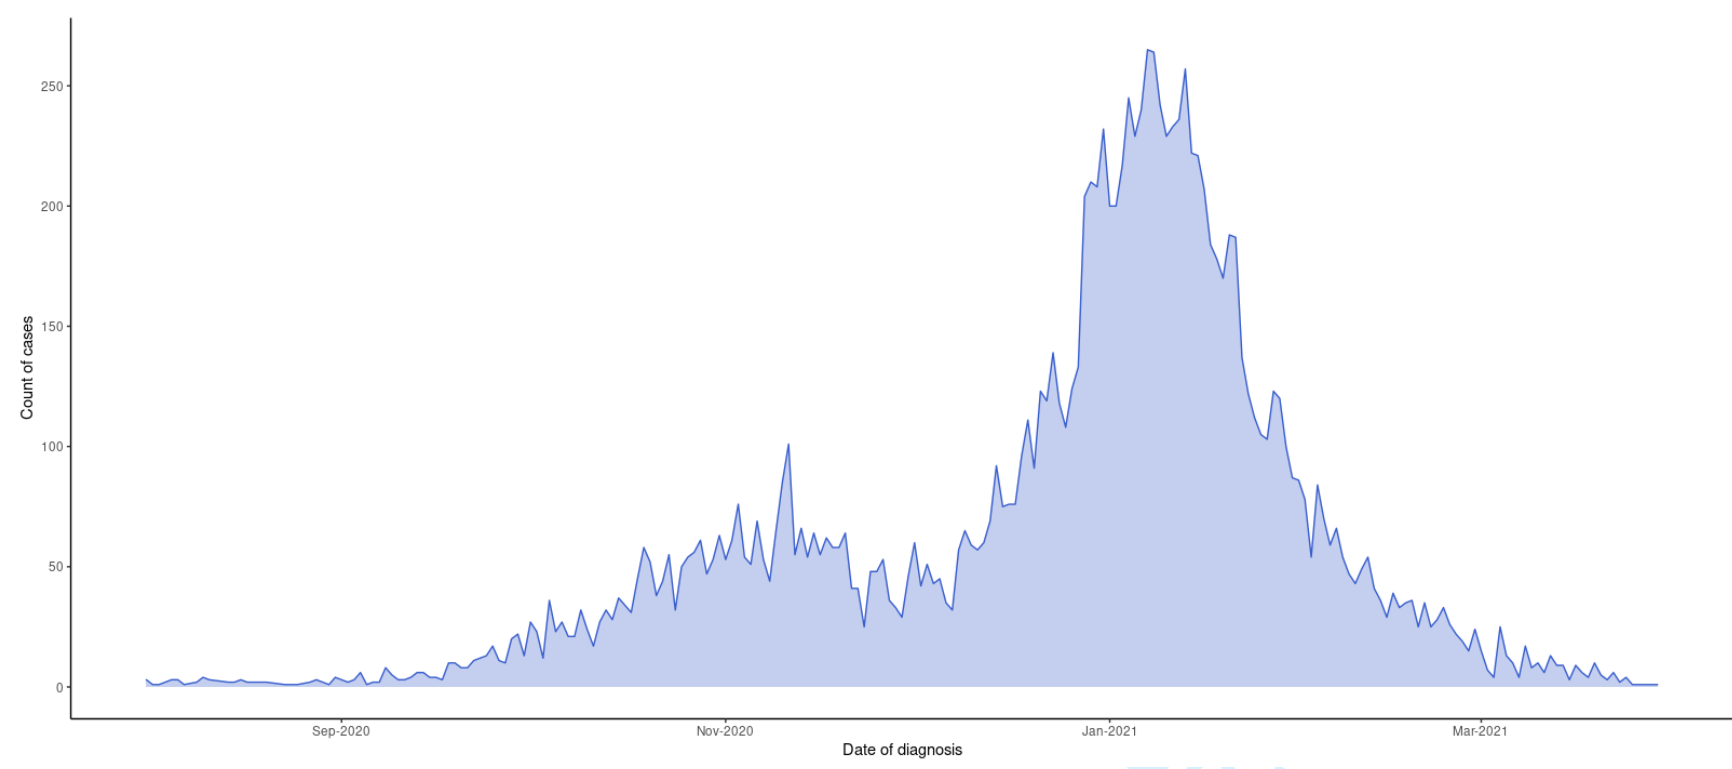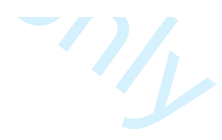

1  
2 Andersen et al (2023)  
3 Classification as defined by England's Deputy Chief Medical Officer  
4 Down's syndrome and other genetic disorders  
5 Solid cancer  
6 Haematological diseases and recipients of haematological stem cell transplants  
7 Renal disease, stage 4 or 5  
8 Liver disease as cirrhosis  
9 Solid organ transplant recipients  
10 Immune-mediated inflammatory disorders  
11 Immune deficiencies  
12 HIV/AIDS  
13 Rare neurological and severe complex life-limiting neurodisability conditions  
14  
15  
16

17 Description of sheet abbreviations:

18 nhs\_ to reflect NHS Highest Risk criteria code list

19 \_XX\_ to reflect the concept

20 \_\_m to reflect medcodeid, \_icd to reflect ICD-10 codes, \_p to reflect procodeid or \_opcs to reflect OPCS proci

23 Format of sheets:

24 medcodeid and procodeid are stored as text, not integers, as per CPRD suggestions.  
25  
26  
27  
28  
29  
30  
31  
32  
33  
34  
35  
36  
37  
38  
39  
40  
41  
42  
43  
44  
45  
46  
47  
48  
49  
50  
51  
52  
53  
54  
55  
56  
57  
58  
59  
60

1  
2  
3  
4  
5  
6  
7  
8  
9  
10  
11  
12  
13  
14  
15  
16  
17  
18  
19  
20  
21  
22  
23  
24  
25  
26  
27  
28  
29  
30  
31  
32  
33  
34  
35  
36  
37  
38  
39  
40  
41  
42  
43  
44  
45  
46  
47  
48  
49  
50  
51  
52  
53  
54  
55  
56  
57  
58  
59  
60

| Medcodeid list | ICD-10 code list | Prodcodeid list | OPCS code list |
|----------------|------------------|-----------------|----------------|
| nhs_dow_m      | nhs_dow_icd      | X               | X              |
| nhs_sol_m      | nhs_sol_icd      | X               | X              |
| nhs_hae_m      | nhs_hae_icd      | nhs_hae_p       | X              |
| nhs_ren_m      | nhs_ren_icd      | X               | X              |
| nhs_cir_m      | nhs_cir_icd      | X               | X              |
| nhs_sot_m      | nhs_sot_icd      | X               | nhs_sot_opcs   |
| nhs_iid_m      | nhs_iid_icd      | nhs_iid_p       | X              |
| nhs_id_m       | nhs_id_m         | X               | X              |
| nhs_hiv_m      | nhs_hiv_icd      | X               | X              |
| nhs_neu_m      | nhs_neu_icd      | X               | X              |

list

For peer review only

| Medcodeid        | Term                                            |
|------------------|-------------------------------------------------|
| 378493013        | Down's syndrome NOS                             |
| 378494019        | Partial trisomy 21 in Down's syndrome           |
| 2159902018       | Suspected Downs syndrome                        |
| 628281000006114  | Down's syndrome                                 |
| 628321000006115  | Down's screening blood test abnormal            |
| 893481000006117  | Down's syndrome                                 |
| 1009531000006118 | Cause of learning disabilities: Down's syndrome |
| 1776611000006113 | Reason for referral: Downs Syndrome             |
| 1922491000006113 | Down syndrome body mass index centile           |
| 2376321000000116 | Down's syndrome height centile                  |
| 2376331000000119 | Down's syndrome weight centile                  |
| 3161041000006119 | Down syndrome                                   |
| 3161061000006115 | Downs syndrome                                  |
| 81676016         | Trisomy 4p syndrome                             |
| 116814019        | 15q partial trisomy syndrome                    |
| 121311016        | 10q partial trisomy syndrome                    |
| 128696013        | Trisomy 9p syndrome                             |
| 315403019        | Partial trisomy syndromes                       |
| 315404013        | Major partial trisomy                           |
| 315405014        | Minor partial trisomy                           |
| 315406010        | Partial trisomy syndrome NOS                    |
| 315413010        | Trisomy and partial trisomy of autosome         |
| 378491010        | Pseudotrismy 18                                 |
| 378497014        | Partial trisomy 18 in Edward's syndrome         |
| 378500015        | Partial trisomy 13 in Patau's syndrome          |
| 1224878018       | Trisomy 21 NOS                                  |
| 3528203016       | Trisomy 21                                      |
| 88351000006114   | Trisomy 21, meiotic nondisjunction              |
| 88361000006111   | Trisomy 21, mitotic nondisjunction              |
| 88371000006116   | Trisomy 21- mitotic nondisjunction mosaicism    |
| 88381000006118   | Trisomy 21, translocation                       |
| 117831000006117  | Suspect trisomy 21 foetus                       |
| 222121000000113  | Trisomy 21                                      |
| 1786411000006115 | 4p partial trisomy syndrome                     |
| 1786421000006111 | 9p partial trisomy syndrome                     |
| 2108171000000119 | Trisomy 9 mosaic syndrome                       |
| 3161031000006112 | Complete trisomy 21 syndrome                    |
| 4830941000006112 | Trisomy 21- meiotic nondisjunction              |
| 68472012         | Mongolism                                       |

1  
2  
3  
4  
5  
6  
7  
8  
9  
10  
11  
12  
13  
14  
15  
16  
17  
18  
19  
20  
21  
22  
23  
24  
25  
26  
27  
28  
29  
30  
31  
32  
33  
34  
35  
36  
37  
38  
39  
40  
41  
42  
43  
44  
45  
46  
47  
48  
49  
50  
51  
52  
53  
54  
55  
56  
57  
58  
59  
60

| ICD-10 code | Term                                           |
|-------------|------------------------------------------------|
| Q90.0       | Trisomy 21, meiotic nondisjunction             |
| Q90.1       | Trisomy 21, mosaicism (mitotic nondisjunction) |
| Q90.2       | Trisomy 21, translocation                      |
| Q90.9       | Down syndrome, unspecified                     |

For peer review only

1  
2 Medcodeid  
3 1009591000006119  
4 1014181000006112  
5 1014311000006119  
6 1014321000006110  
7 1014331000006113  
8 103180017  
9 103875012  
10 109371000006115  
11 109381000006117  
12 109391000006119  
13 113381000006118  
14 113391000006115  
15 113411000006115  
16 113765010  
17 113768012  
18 11777961000006118  
19 118291012  
20 118574012  
21 11878501000006110  
22 11902631000006118  
23 11903941000006110  
24 11903951000006112  
25 11903991000006118  
26 11904011000006113  
27 11904021000006117  
28 11904031000006119  
29 11904041000006112  
30 11904051000006114  
31 11904061000006111  
32 11904071000006116  
33 11904091000006115  
34 11904101000006114  
35 11904111000006112  
36 11904121000006116  
37 11904131000006118  
38 11904141000006111  
39 11904151000006113  
40 11904161000006110  
41 11904171000006115  
42 11904201000006116  
43 11904211000006118  
44 11904231000006112  
45 11904241000006119  
46 11904251000006117  
47 11904261000006115  
48 11904281000006113  
49 11904291000006111  
50 11904301000006112  
51 11904311000006110

For peer review only



1  
2 11904531000006110  
3 11904891000006112  
4 11905951000006111  
5 11906051000006117  
6 11906061000006115  
7 11906071000006110  
8 11906231000006119  
9 11906291000006115  
10 11906441000006113  
11 11906521000006119  
12 11906531000006116  
13 11906621000006115  
14 11906631000006117  
15 11906971000006114  
16 11906981000006112  
17 11907071000006113  
18 11907261000006114  
19 11907841000006114  
20 11907871000006118  
21 11908001000006115  
22 11908061000006119  
23 11908071000006114  
24 11908111000006118  
25 11908121000006114  
26 11908181000006113  
27 11908201000006114  
28 11908321000006111  
29 11908461000006111  
30 11908471000006116  
31 11908501000006111  
32 11908511000006114  
33 11908841000006110  
34 11908851000006112  
35 11908881000006116  
36 11908991000006114  
37 11909131000006117  
38 11909301000006111  
39 11909311000006114  
40 11909341000006113  
41 11909351000006110  
42 11909361000006112  
43 11918081000006110  
44 11918121000006112  
45 11918131000006110  
46 11918191000006114  
47 11918201000006112  
48 11918251000006111  
49 11918261000006113  
50 11918281000006115  
51 11918311000006118  
52  
53  
54  
55  
56  
57  
58  
59  
60

For peer review only

1 11919851000006115  
2 11923431000006116  
3 11923481000006115  
4 11925141000006117  
5 11925531000006118  
6 11925551000006113  
7 11925561000006110  
8 11925571000006115  
9 11925581000006117  
10 11925591000006119  
11 11925601000006110  
12 11925611000006113  
13 11925631000006119  
14 11925691000006115  
15 11925701000006115  
16 11925731000006111  
17 11925741000006118  
18 11925761000006119  
19 11925771000006114  
20 11925781000006112  
21 11925821000006118  
22 11925861000006112  
23 11925871000006117  
24 11925881000006119  
25 11925901000006117  
26 11926011000006111  
27 11926961000006110  
28 11928591000006113  
29 11989451000006116  
30 11989471000006114  
31 11989511000006116  
32 11989531000006110  
33 11989541000006117  
34 11989581000006111  
35 11989591000006114  
36 11989701000006113  
37 120463018  
38 12079021000006115  
39 1208876015  
40 1210553016  
41 1210554010  
42 1210561014  
43 1210566016  
44 1210642019  
45 12121681000006119  
46 12121741000006119  
47 1215809015  
48 1215862010  
49 1215896015  
50 1216013019

For peer review only

1  
2 1216064018  
3 1216076018  
4 1216077010  
5 1216078017  
6 1216084019  
7 1216230014  
8 1216343012  
9 1216356017  
10 1216395016  
11 1216406014  
12 1216442018  
13 1216464010  
14 1216486011  
15 1216488012  
16 1216595017  
17 1216598015  
18 1216670013  
19 1216721019  
20 1216731014  
21 1216817017  
22 1216826019  
23 1216834013  
24 1216845011  
25 1216896013  
26 1216922016  
27 1216937017  
28 1217037013  
29 1217274016  
30 1217275015  
31 1217276019  
32 1217360013  
33 1217367011  
34 12188311000006119  
35 12188321000006110  
36 1219467016  
37 1219468014  
38 1219531013  
39 1219533011  
40 1219534017  
41 1219535016  
42 1219537012  
43 1219538019  
44 1219540012  
45 1219789016  
46 1219790013  
47 12201281000006111  
48 12201291000006114  
49 1220205018  
50 1220352014  
51 12204961000006112

For peer review only

1  
2 1220823019  
3 1220825014  
4 1220826010  
5 1221171011  
6 1221209015  
7 1221241014  
8 1221282014  
9 1221446018  
10 1221504012  
11 1222102015  
12 1222167011  
13 1222168018  
14 1222169014  
15 1222170010  
16 1222176016  
17 1222177013  
18 1222182018  
19 1222183011  
20 1222184017  
21 1222189010  
22 1222216017  
23 12222311000006112  
24 1222303015  
25 1222626017  
26 1222660012  
27 1224870013  
28 1225879015  
29 1226380017  
30 1227295013  
31 1227435013  
32 1227517019  
33 1227518012  
34 1227548010  
35 1228188010  
36 1228259019  
37 1228267010  
38 1228349017  
39 1228493018  
40 1228504019  
41 1228506017  
42 1228509012  
43 1228510019  
44 1228513017  
45 1228523014  
46 1228529013  
47 1228530015  
48 1228532011  
49 1228537017  
50 1228538010  
51 1228539019  
52  
53  
54  
55  
56  
57  
58  
59  
60

For peer review only

1  
2 1228540017  
3 1228541018  
4 1228542013  
5 1228543015  
6 1228549016  
7  
8 1228552012  
9 1228553019  
10 1228557018  
11 1228565015  
12 1228566019  
13 1228567011  
14 1228570010  
15 1228575017  
16 1229372013  
17 1229424011  
18 1229453012  
19 1229513011  
20 1229572014  
21 1229592019  
22 1229971014  
23 1230100013  
24 1230106019  
25 1230127012  
26 1230128019  
27 1230234015  
28 1230440012  
29 1230709016  
30 1230800010  
31 1230882017  
32 1231004013  
33 1231028010  
34 1231089017  
35 1231231016  
36 1231237017  
37 1231363012  
38 1231370012  
39 1231413015  
40 1231451015  
41 1231544010  
42 1231622010  
43 1231760012  
44 1231927019  
45 1231967018  
46 1231976013  
47 1232066010  
48 1232189017  
49 1232355013  
50 1232370014  
51 1232438010  
52 1232439019  
53  
54  
55  
56  
57  
58  
59  
60

For peer review only

1  
2 1232482018  
3 1232564019  
4 1232889015  
5 1232905013  
6 1233222010  
7  
8 1233457010  
9 1233536016  
10 1233722011  
11 1233806015  
12  
13 1234006011  
14 1234144017  
15 1234193010  
16 1234296013  
17 1234619014  
18 1234620015  
19 1234621016  
20  
21 1234787012  
22 1234884012  
23 1235052014  
24 1235152011  
25 1235290011  
26 1235301017  
27 1235321016  
28 1235762013  
29 1235785014  
30 1235786010  
31 1235798017  
32 1235875018  
33 1235891015  
34 1235961012  
35  
36 12449811000006113  
37 12450991000006117  
38 12455781000006112  
39 12455811000006114  
40 12455841000006113  
41 12455871000006117  
42 12473091000006110  
43 12483411000006119  
44 12483441000006115  
45 126941000006114  
46 12702541000006115  
47 12702551000006118  
48 12702831000006111  
49 12702841000006118  
50 12703551000006113  
51 12703771000006114  
52 12704581000006119  
53 12704591000006116  
54 12704601000006112  
55 12716281000006114  
56  
57  
58  
59  
60

For peer review only

1  
2 12716931000006116  
3 12718191000006116  
4 12718821000006112  
5 12718971000006119  
6 12718981000006116  
7 12719081000006110  
8 12719091000006113  
9 12719101000006119  
10 12720651000006110  
11 12721091000006119  
12 12721101000006113  
13 12721241000006118  
14 12721271000006114  
15 12721361000006112  
16 12721371000006117  
17 12721381000006119  
18 12722951000006118  
19 12723261000006118  
20 12723281000006111  
21 12723331000006119  
22 12723471000006112  
23 12723521000006110  
24 12724541000006118  
25 12725431000006113  
26 12726621000006116  
27 12726631000006118  
28 12726641000006111  
29 12726691000006119  
30 12728601000006113  
31 12730141000006116  
32 12730301000006115  
33 12731741000006112  
34 12732041000006119  
35 12732221000006117  
36 12732231000006119  
37 12732731000006114  
38 12732791000006113  
39 12732801000006114  
40 12759251000006116  
41 12761761000006119  
42 12762081000006117  
43 12762111000006111  
44 12762121000006115  
45 12762131000006117  
46 12762141000006110  
47 12762151000006112  
48 12762161000006114  
49 12762171000006119  
50 12762181000006116  
51 12762191000006118

For peer review only

1  
2 12762201000006115  
3 12762211000006117  
4 12762221000006113  
5 130662013  
6 134219012  
7  
8 138104014  
9 138122012  
10 139181000000118  
11 139191000000116  
12  
13 140927016  
14 143288017  
15 144849016  
16 146211000006117  
17 146221000006113  
18  
19 1476341013  
20 1478958017  
21 1488429015  
22 1488604019  
23 1488634012  
24 1488663010  
25 1488772013  
26 1488780018  
27 1488781019  
28 1488798019  
29 1488803011  
30 1488803011  
31 1489328015  
32 1489329011  
33 1489330018  
34 1489331019  
35 1490308014  
36 1490770018  
37 1490806016  
38 1490807013  
39 1494921019  
40 1494922014  
41 151101000006116  
42 151111000006118  
43 151121000006114  
44 151131000006112  
45 151141000006119  
46 151151000006117  
47 151321000006111  
48 151331000006114  
49 151401000006110  
50 151421000006117  
51 151621000006119  
52 152611000006116  
53 153085017  
54 153088015  
55 153089011

For peer review only



1  
2 153099018  
3 153102018  
4 153107012  
5 153111018  
6 153112013  
7 153124018  
8 153129011  
9 153133016  
10 153136012  
11 153140015  
12 153141016  
13 153143018  
14 153146014  
15 153149019  
16 153150019  
17 153151015  
18 153155012  
19 153156013  
20 153157016  
21 153160011  
22 153162015  
23 153169012  
24 153173010  
25 153174016  
26 153180012  
27 153187010  
28 153191017  
29 153193019  
30 153200017  
31 153203015  
32 153218019  
33 153229015  
34 153231012  
35 153239014  
36 153246017  
37 153247014  
38 153248016  
39 153256018  
40 153258017  
41 153265013  
42 153267017  
43 153268010  
44 153272014  
45 153276012  
46 153280019  
47 153282010  
48 153283017  
49 153286013  
50 153288014  
51 153295017

For peer review only

1  
2 153296016  
3 153299011  
4 153300015  
5 153311011  
6 153313014  
7 153317010  
8 153318017  
9 153319013  
10 153320019  
11 153321015  
12 153327016  
13 153332015  
14 153335018  
15 153336017  
16 153337014  
17 153338016  
18 153340014  
19 153343011  
20 153344017  
21 153345016  
22 153348019  
23 153350010  
24 153358015  
25 153364010  
26 153365011  
27 153367015  
28 153376010  
29 153380017  
30 153382013  
31 153386011  
32 153388012  
33 153410011  
34 153422014  
35 154231019  
36 155060012  
37 155068017  
38 155072018  
39 155076015  
40 155078019  
41 155085015  
42 155089014  
43 155090017  
44 155155010  
45 155168019  
46 155175018  
47 155191015  
48 155193017  
49 155206014  
50 155207017  
51 155209019

For peer review only

1  
2 155211011  
3 155218017  
4 155222010  
5 155228014  
6 155231010  
7 155246015  
8 155247012  
9 155259011  
10 155269017  
11 155272012  
12 155287019  
13 155294016  
14 155305011  
15 155308013  
16 155332018  
17 155361017  
18 155364013  
19 155368011  
20 155370019  
21 155402013  
22 155417012  
23 155418019  
24 155421017  
25 155425014  
26 155441010  
27 155444019  
28 155446017  
29 155447014  
30 155449012  
31 155452016  
32 155457010  
33 155458017  
34 155459013  
35 155468010  
36 155473016  
37 155477015  
38 155479017  
39 155483017  
40 155488014  
41 155495017  
42 155501015  
43 155503017  
44 155517014  
45 155520018  
46 155521019  
47 155522014  
48 155525011  
49 155529017  
50 155533012  
51 155534018

For peer review only

1  
2 155536016  
3 155537013  
4 155538015  
5 155539011  
6 155540013  
7 155542017  
8 155545015  
9 155547011  
10 155550014  
11 155552018  
12 155553011  
13 155556015  
14 155582012  
15 155592016  
16 155604019  
17 155607014  
18 155624015  
19 155641018  
20 155669014  
21 155675017  
22 155677013  
23 155681013  
24 155711012  
25 155773015  
26 155879014  
27 155967013  
28 156007019  
29 156169017  
30 1562151000006111  
31 156231017  
32 156237018  
33 156291015  
34 156319016  
35 156375015  
36 156493015  
37 156557015  
38 156585018  
39 156607018  
40 156627017  
41 156699010  
42 156719018  
43 156747019  
44 156765015  
45 156777013  
46 156825010  
47 156883018  
48 156919012  
49 156973018  
50 156977017  
51 156989015  
52  
53  
54  
55  
56  
57  
58  
59  
60

For peer review only

1  
2 156997010  
3 157025019  
4 157481000006111  
5 157491000006114  
6 157501000006118  
7 157511000006115  
8 157521000006111  
9 157531000006114  
10 157541000006116  
11 157551000006119  
12 157561000006117  
13 157571000006112  
14 157581000006110  
15 157591000006113  
16 157601000006117  
17 157611000006119  
18 157621000006110  
19 157631000006113  
20 157641000006115  
21 157651000006118  
22 1576561000006114  
23 157661000006116  
24 1576631000006118  
25 1576661000006110  
26 157671000006111  
27 157681000006114  
28 157691000006112  
29 157701000006112  
30 157711000006110  
31 157721000006119  
32 157731000006116  
33 157732017  
34 157741000006114  
35 157751000006111  
36 157761000006113  
37 157771000006118  
38 157781000006115  
39 157801000006116  
40 157811000006118  
41 157821000006114  
42 157831000006112  
43 157841000006119  
44 157861000006115  
45 157871000006110  
46 157881000006113  
47 157891000006111  
48 157901000006110  
49 157911000006113  
50 157921000006117  
51 157931000006119

For peer review only

1  
2 157941000006112  
3 157951000006114  
4 157961000006111  
5 157971000006116  
6 158091000000113  
7  
8 1626091000006115  
9 1626111000006112  
10 1626191000006119  
11 1626201000006116  
12  
13 1653961000006118  
14 1655261000000116  
15 1660561000000116  
16 1673281000000110  
17 1688911000000114  
18 1694771000006118  
19 1694781000006115  
20 1697891000006116  
21 1699081000006116  
22  
23 170673014  
24 17271015  
25  
26 1728161000006116  
27 173816012  
28 173821010  
29 173823013  
30 173825018  
31 173833017  
32 173941016  
33 173944012  
34 173946014  
35 173950019  
36 174518012  
37 174532014  
38 174562015  
39 174576019  
40 174577011  
41  
42 1745971000006116  
43 1755771000006115  
44 1755801000006118  
45 1755811000006115  
46 1755821000006111  
47  
48 175996013  
49  
50 1761001000006118  
51 1762101000006113  
52 1762111000006111  
53 1770471000006116  
54 1770481000006118  
55 1770491000006115  
56 1770501000006111  
57 177051000006111  
58 1770511000006114  
59  
60

For peer review only

1  
2 1770521000006118  
3 1772971000006112  
4 1772981000006110  
5 177311000006112  
6 1773111000006111  
7 1773121000006115  
8 1773131000006117  
9 1773141000006110  
10 1773151000006112  
11 1773161000006114  
12 1774631000006111  
13 1774711000006113  
14 1774721000006117  
15 1774731000006119  
16 1774741000006112  
17 1774751000006114  
18 1774761000006111  
19 1774771000006116  
20 1775301000006110  
21 1776121000006112  
22 1780314010  
23 1780324019  
24 1780499017  
25 1780500014  
26 1785811000006114  
27 1786811017  
28 1788227011  
29 1803771000006112  
30 1803781000006110  
31 1805901000006116  
32 1806421000006110  
33 1814931000006110  
34 1815011000006116  
35 1815251000006112  
36 1815421000006116  
37 1841511000006115  
38 1841531000006114  
39 1842161000006118  
40 1842171000006113  
41 1842181000006111  
42 1844571000006114  
43 1847541000006113  
44 1859381000006117  
45 1859531000006112  
46 1868351000006110  
47 1870381000006113  
48 1870391000006111  
49 1877231000006117  
50 1884191000006113  
51 1884201000006111

For peer review only

1  
2 1884211000006114  
3 1887221000006112  
4 188741000006119  
5 1908611000006111  
6 1937971000006115  
7  
8 195278019  
9 1959991000006111  
10 1960001000006118  
11 1960021000006111  
12 1960041000006116  
13  
14 196084019  
15 1980761000006116  
16 201638010  
17 201640017  
18  
19 2023161000006111  
20 2023171000006116  
21 2023181000006118  
22 2023191000006115  
23  
24 207428016  
25 207611012  
26 215751000000116  
27 215761000000118  
28 215781000000110  
29 215791000000112  
30  
31 215883014  
32 215884015  
33 215885019  
34 215889013  
35 215896010  
36 215897018  
37  
38 215903010  
39 215917018  
40 216227011  
41 2164653019  
42  
43 2180581000000112  
44 2181051000000117  
45 219051000000116  
46 219071000000113  
47 219081000000110  
48  
49 219181000006119  
50 2229231000000114  
51 2229271000000111  
52 223121000000116  
53 223131000000119  
54 223181000000115  
55  
56 226211000000111  
57 2265611000000111  
58 2265651000000110  
59 226911000000117  
60 2280211000000117

For peer review only



1  
2 2280371000000117  
3 229731000006113  
4 229901000006119  
5 2309351000000112  
6 2346191000000117  
7 2438511000000112  
8 2438551000000111  
9 2438591000000115  
10 2438631000000115  
11 2438671000000118  
12 2438711000000117  
13 2438751000000118  
14 2438791000000114  
15 2438871000000117  
16 2438911000000115  
17 2438951000000116  
18 2453201000000117  
19 2460981000000118  
20 247091000006118  
21 2475562018  
22 2475564017  
23 2475984012  
24 248261000006117  
25 248331000006118  
26 248341000006111  
27 248391000006119  
28 2492161000000114  
29 2504131000006112  
30 2504141000006119  
31 2504151000006117  
32 2504161000006115  
33 2504171000006110  
34 2504181000006113  
35 2508461000006119  
36 2512951000006110  
37 2512961000006112  
38 2512971000006117  
39 2512981000006119  
40 2513181000006113  
41 2513191000006111  
42 2514071000006111  
43 2514081000006114  
44 2514091000006112  
45 2514101000006118  
46 2514111000006115  
47 2514281000006119  
48 2514291000006116  
49 2514301000006115  
50 2519741000006118  
51 2519751000006116

For peer review only

1 2519761000006119  
2 2519771000006114  
3 2519781000006112  
4 2521381000006119  
5 2522541000006111  
6 2522551000006113  
7 2522561000006110  
8 2522571000006115  
9 2522581000006117  
10 2523951000006113  
11 2529521000006112  
12 2529531000006110  
13 2530971000006110  
14 2532021000006114  
15 2532031000006112  
16 2532041000006119  
17 2532051000006117  
18 2533101000006110  
19 2533540016  
20 2533542012  
21 2533653010  
22 2534079012  
23 2534080010  
24 2534102018  
25 2534331000006115  
26 2534341000006113  
27 2534351000006110  
28 2534461000006118  
29 2534471000006113  
30 2534481000006111  
31 2542411000006113  
32 2546301000006117  
33 2546311000006119  
34 2546341000006115  
35 2546351000006118  
36 2546721000006114  
37 2546741000006119  
38 2546761000006115  
39 2548453016  
40 2548491000006118  
41 2548867016  
42 2549077010  
43 2549374014  
44 2549900011  
45 2550105015  
46 2552865010  
47 2553899015  
48 2560241000006117  
49 2566401000006115  
50 2567481000006114

For peer review only

1  
2 2571431000006111  
3 2571441000006118  
4 2571451000006116  
5 2572011000006116  
6 2572021000006112  
7 2572031000006110  
8 2572131000006111  
9 2572791000006111  
10  
11 2576875014  
12 2578161000006117  
13 2579501000006115  
14 2579511000006117  
15 2579521000006113  
16 2579531000006111  
17 2579541000006118  
18 2579551000006116  
19 2580121000006117  
20 2580131000006119  
21 2580141000006112  
22 2580151000006114  
23 258131000000113  
24 2583521000006115  
25 2588811000006118  
26 2588821000006114  
27 25891000006113  
28 2589791000006112  
29 2589801000006113  
30 2589811000006111  
31 2590251000006117  
32 2590261000006115  
33 2594581000006117  
34 2599111000006117  
35 2599121000006113  
36 2599131000006111  
37 2599151000006116  
38 2602601000006112  
39 2603511000006116  
40 2603521000006112  
41 2603531000006110  
42 2603551000006115  
43 2603561000006118  
44 2605901000006110  
45 2606061000006118  
46 260962019  
47 260992011  
48 2611781000006115  
49 2614161000000116  
50 2616201000006111  
51 2616211000006114  
52 2616221000006118

For peer review only

1  
2 2616231000006115  
3 2616241000006113  
4 261676014  
5 2619456011  
6 2629941000006115  
7 2629951000006118  
8 2629961000006116  
9 2629971000006111  
10 2629981000006114  
11 2629991000006112  
12 2630001000006111  
13 2630011000006114  
14 2630021000006118  
15 2633491000006117  
16 2633501000006113  
17 2633511000006111  
18 2633521000006115  
19 2633531000006117  
20 2633541000006110  
21 2638321000006118  
22 2643781000006112  
23 2643791000006110  
24 2643801000006111  
25 2645961000006117  
26 2648391000006117  
27 2648401000006115  
28 265193019  
29 2653191000006112  
30 2656161000006112  
31 2657681000006114  
32 2659691014  
33 2659772015  
34 2659784018  
35 2660421000006117  
36 2660431000006119  
37 2660441000006112  
38 2660451000006114  
39 2660471000006116  
40 2660481000006118  
41 2663631000006113  
42 2663641000006115  
43 2663651000006118  
44 2663661000006116  
45 2663671000006111  
46 2663721000006119  
47 2663731000006116  
48 2663741000006114  
49 2663751000006111  
50 2663761000006113  
51 2670171000006118

For peer review only

1  
2 2670181000006115  
3 2676141000006111  
4 2676151000006113  
5 2683131000006119  
6 2683161000006111  
7 2685781000006116  
8 2685791000006118  
9 2685801000006117  
10 2687831000006115  
11 2692069010  
12 2693661000006119  
13 2693681000006112  
14 2695891000006113  
15 2696141000006115  
16 2696151000006118  
17 2696161000006116  
18 2696171000006111  
19 2696641000006110  
20 2696651000006112  
21 2697401000006114  
22 2698611000006110  
23 2700801000006115  
24 2700811000006117  
25 2700821000006113  
26 2701771000006114  
27 27022019  
28 2705451000006114  
29 2705611000006110  
30 2705621000006119  
31 2705631000006116  
32 2707431000006113  
33 2707451000006118  
34 2707461000006116  
35 2710081000006118  
36 2710091000006115  
37 2710101000006114  
38 2710111000006112  
39 2710121000006116  
40 2710131000006118  
41 27148012  
42 2715221000006118  
43 2715231000006115  
44 2715241000006113  
45 2715251000006110  
46 2720021000006113  
47 2726001000006118  
48 2726011000006115  
49 2726021000006111  
50 2726711000006117  
51 2726761000006119

For peer review only

1 272715013  
2  
3 2729631000006110  
4 2731021000000110  
5 2734661000006117  
6 2734671000006112  
7 2734681000006110  
8 2734691000006113  
9 2734701000006113  
10 2734711000006111  
11 2734721000006115  
12 2737451000006113  
13 2737461000006110  
14 2737471000006115  
15 2737481000006117  
16 2737491000006119  
17 2740511000006111  
18 2741741000006112  
19 2741761000006111  
20 274480013  
21 2747671000006116  
22 2748631000006115  
23 2751951000006114  
24 2753081000006116  
25 2753271000006113  
26 2753291000006114  
27 2753301000006110  
28 2755121000006118  
29 2756681000006117  
30 2756691000006119  
31 2756701000006119  
32 2756711000006116  
33 2769471000006119  
34 2773871000006111  
35 2773881000006114  
36 2786351000006110  
37 2786361000006112  
38 2786371000006117  
39 2786381000006119  
40 2786391000006116  
41 2786401000006119  
42 2786421000006112  
43 2786431000006110  
44 2786441000006117  
45 2786451000006115  
46 2787491000006111  
47 2787501000006115  
48 2787511000006117  
49 2787521000006113  
50 278940016  
51 278946010  
52  
53  
54  
55  
56  
57  
58  
59  
60

For peer review only

1  
2 2791641000006110  
3 2791661000006114  
4 2791871000006115  
5 2793071000006111  
6 2793081000006114  
7 2794841000006114  
8 2794851000006111  
9 2796431000006114  
10 2798321000006118  
11 2798331000006115  
12 2798341000006113  
13 2798351000006110  
14 2798361000006112  
15 2799261000006110  
16 2799271000006115  
17 2799391000006113  
18 2799401000006110  
19 2799411000006113  
20 2799421000006117  
21 2799431000006119  
22 2799451000006114  
23 2802681000006112  
24 2803661000006110  
25 2806921000006116  
26 2808981000006118  
27 2808991000006115  
28 2809001000006115  
29 2809021000006113  
30 2809041000006118  
31 2809051000006116  
32 2809061000006119  
33 2813741000006119  
34 2813751000006117  
35 2813761000006115  
36 2813771000006110  
37 2813781000006113  
38 2813791000006111  
39 2813801000006112  
40 2816091000006115  
41 2823531000006112  
42 2823541000006119  
43 2823551000006117  
44 2823561000006115  
45 2823571000006110  
46 2823581000006113  
47 2823591000006111  
48 2823601000006115  
49 2823611000006117  
50 2823621000006113  
51 2823631000006111

For peer review only

1  
2 2823881000006111  
3 2823891000006114  
4 2823901000006113  
5 2823911000006111  
6 2825221000006110  
7 2825231000006113  
8 282787016  
9 2828781000006114  
10 2830421000006118  
11 2831281000006114  
12 2833391000006117  
13 2833401000006115  
14 2833411000006117  
15 2833421000006113  
16 2833431000006111  
17 2839071000006118  
18 2839081000006115  
19 2839091000006117  
20 2839101000006111  
21 2839111000006114  
22 2843421000006112  
23 2845381000006118  
24 2845391000006115  
25 2845401000006118  
26 2845411000006115  
27 2845441000006116  
28 2845451000006119  
29 2845461000006117  
30 2847981000006112  
31 2848541000006110  
32 2848551000006112  
33 2849391000006118  
34 2861541000006110  
35 2861551000006112  
36 2868371000006118  
37 2868381000006115  
38 287014015  
39 287020019  
40 287021015  
41 287031010  
42 2870981000006110  
43 287191010  
44 2872268016  
45 287384018  
46 2874101000006110  
47 2880201000006116  
48 2880231000006112  
49 288185010  
50 288186011  
51 288350019

For peer review only



1  
2 288351015  
3 288354011  
4 288355012  
5 288362015  
6 288363013  
7 288364019  
8 288372017  
9 288377011  
10 288380012  
11 288382016  
12 288387010  
13 288388017  
14 288390016  
15 288391017  
16 288393019  
17 288403012  
18 288404018  
19 288406016  
20 288407013  
21 288408015  
22 288409011  
23 288410018  
24 288411019  
25 288412014  
26 288414010  
27 288417015  
28 288418013  
29 288419017  
30 288423013  
31 288427014  
32 288429012  
33 288430019  
34 288433017  
35 288434011  
36 288435012  
37 288437016  
38 288438014  
39 288439018  
40 288440016  
41 288443019  
42 288444013  
43 288448011  
44 288449015  
45 288450015  
46 288453018  
47 288454012  
48 288459019  
49 288460012  
50 288465019  
51 288468017

For peer review only

1  
2 288469013  
3 288470014  
4 288471013  
5 288472018  
6 288473011  
7 288474017  
8 288478019  
9 288485015  
10 288486019  
11 288505015  
12 288506019  
13 288507011  
14 288508018  
15 288509014  
16 288510016  
17 288515014  
18 288516010  
19 288517018  
20 288518011  
21 288522018  
22 288529010  
23 288532013  
24 288533015  
25 288541015  
26 288546013  
27 288548014  
28 288550018  
29 288552014  
30 288554010  
31 288556012  
32 288561014  
33 288563012  
34 288564018  
35 288568015  
36 288570012  
37 288571011  
38 288573014  
39 288578017  
40 288582015  
41 288589012  
42 288594012  
43 288597017  
44 288602012  
45 288607018  
46 288608011  
47 288614016  
48 288625013  
49 288628010  
50 288631011  
51 288632016

For peer review only

1  
2 288633014  
3 288635019  
4 288638017  
5 288639013  
6 288641014  
7 288644018  
8 288647013  
9 288649011  
10 288650011  
11 288652015  
12 288653013  
13 288654019  
14 288655018  
15 288656017  
16 288659012  
17 288663017  
18 288670017  
19 288671018  
20 288675010  
21 288685011  
22 288688013  
23 288690014  
24 288692018  
25 288694017  
26 288697012  
27 288698019  
28 288699010  
29 288700011  
30 288702015  
31 288707014  
32 288711015  
33 288712010  
34 288717016  
35 288720012  
36 288723014  
37 288731016  
38 288734012  
39 288735013  
40 288736014  
41 288739019  
42 288741018  
43 288742013  
44 288744014  
45 288747019  
46 288748012  
47 288749016  
48 288751017  
49 288754013  
50 288756010  
51 288757018

For peer review only

1  
2 288759015  
3 288760013  
4 288761012  
5 288762017  
6 288763010  
7 288764016  
8 288766019  
9 288771014  
10 288772019  
11 288775017  
12 288776016  
13 288779011  
14 288784017  
15 288787012  
16 288790018  
17 288792014  
18 288794010  
19 288797015  
20 288799017  
21 288800018  
22 288801019  
23 288802014  
24 288803016  
25 288806012  
26 288807015  
27 288808013  
28 288809017  
29 288810010  
30 288811014  
31 288813012  
32 288815017  
33 288819011  
34 288820017  
35 288821018  
36 288822013  
37 288823015  
38 288824014  
39 288825010  
40 288826011  
41 288827019  
42 288828012  
43 288829016  
44 288832018  
45 288839010  
46 288840012  
47 288841011  
48 288847010  
49 288852017  
50 288857011  
51 288858018

For peer review only

1  
2 288869015  
3 288872010  
4 288875012  
5 288883018  
6 288885013  
7 288886014  
8 288887017  
9 288888010  
10 288889019  
11 288894019  
12 288896017  
13 288897014  
14 288898016  
15 288901015  
16 288909018  
17 288910011  
18 288911010  
19 288912015  
20 288913013  
21 288914019  
22 288915018  
23 288916017  
24 288917014  
25 288918016  
26 288919012  
27 288920018  
28 288921019  
29 288922014  
30 288923016  
31 288924010  
32 288928013  
33 288929017  
34 288930010  
35 288931014  
36 288935017  
37 288941012  
38 288942017  
39 288943010  
40 288944016  
41 288946019  
42 288947011  
43 288948018  
44 288949014  
45 288950014  
46 288951013  
47 288952018  
48 288953011  
49 288959010  
50 288960017  
51 288962013

For peer review only

1  
2 288963015  
3 288964014  
4 288967019  
5 288968012  
6 288969016  
7 288970015  
8 288971016  
9 288972011  
10 288975013  
11 288979019  
12 288980016  
13 288985014  
14 288986010  
15 288991011  
16 288995019  
17 288999013  
18 289001014  
19 289007013  
20 289008015  
21 289009011  
22 289011019  
23 289012014  
24 289013016  
25 289014010  
26 289015011  
27 289017015  
28 289019017  
29 289021010  
30 289022015  
31 289023013  
32 289024019  
33 289025018  
34 289026017  
35 289027014  
36 289028016  
37 289029012  
38 289030019  
39 289031015  
40 289033017  
41 289034011  
42 289037016  
43 289039018  
44 289040016  
45 289041017  
46 289042012  
47 289043019  
48 289044013  
49 289045014  
50 289046010  
51 289047018

For peer review only

1  
2 289048011  
3 289049015  
4 289050015  
5 289051016  
6 289052011  
7 289053018  
8 289054012  
9 289055013  
10 289056014  
11 289057017  
12 289059100006113  
13 289060012  
14 289060100006117  
15 289063014  
16 289066018  
17 289079010  
18 289080013  
19 289084016  
20 289088018  
21 289089014  
22 289091018  
23 289092013  
24 289094014  
25 289095010  
26 289096011  
27 289097019  
28 289099016  
29 289101100006116  
30 289102100006112  
31 289103100006110  
32 289104100006117  
33 289107010  
34 289108017  
35 289110015  
36 289111016  
37 289114012  
38 289115013  
39 289116014  
40 289121012  
41 289122017  
42 289124016  
43 289127011  
44 289128018  
45 289131017  
46 289132012  
47 289137018  
48 289140018  
49 289141019  
50 289142014  
51 289143016

For peer review only

1  
2 289144010  
3 289145011  
4 289146012  
5 289147015  
6 289148013  
7 289149017  
8 289150017  
9 289151018  
10 289153015  
11 289156011  
12 289157019  
13 289158012  
14 289159016  
15 289166015  
16 289171010  
17 289172015  
18 289173013  
19 289175018  
20 289178016  
21 289179012  
22 289180010  
23 289181014  
24 289182019  
25 289184018  
26 289187013  
27 289188015  
28 289189011  
29 289190019  
30 289191015  
31 289192010  
32 289193017  
33 289194011  
34 289195012  
35 289196013  
36 289197016  
37 289198014  
38 289199018  
39 289202011  
40 289203018  
41 289204012  
42 289206014  
43 289207017  
44 289208010  
45 289209019  
46 289210012  
47 289217010  
48 289219013  
49 289223017  
50 289224011  
51 289234019

For peer review only



1  
2 289242018  
3 289246015  
4 289249010  
5 289251014  
6 289252019  
7 289257013  
8 289259011  
9 289260018  
10 289262014  
11 289267015  
12 289270016  
13 289271017  
14 289272012  
15 289275014  
16 2892751000006112  
17 289276010  
18 289279015  
19 289280017  
20 289281018  
21 289285010  
22 289288012  
23 289294016  
24 289296019  
25 289297011  
26 289298018  
27 289299014  
28 289301019  
29 289308013  
30 289311014  
31 289314018  
32 289315017  
33 289316016  
34 289317013  
35 289318015  
36 289319011  
37 289322013  
38 289325010  
39 289326011  
40 289327019  
41 289329016  
42 289330014  
43 289337012  
44 289338019  
45 289339010  
46 289341011  
47 289343014  
48 289345019  
49 289346018  
50 289347010  
51 289348017

For peer review only

1  
2 289349013  
3 289352017  
4 2893521000006118  
5 289353010  
6 2893531000006115  
7  
8 289354016  
9 289355015  
10 289356019  
11 289357011  
12  
13 289358018  
14 289360016  
15 289361017  
16 289362012  
17 289364013  
18  
19 289365014  
20 289369015  
21 289374011  
22 289375012  
23 289376013  
24  
25 289378014  
26 289379018  
27 289380015  
28 289381016  
29 289382011  
30 289383018  
31 289388010  
32 289389019  
33 289390011  
34 289396017  
35 289397014  
36 289406011  
37 289409016  
38 289413011  
39 289419010  
40 289421017  
41 289423019  
42 289424013  
43 289425014  
44 289426010  
45 289427018  
46 289428011  
47 289429015  
48 289430013  
49 289431012  
50 289432017  
51 289435015  
52 289436019  
53 289437011  
54 289438018  
55 289441010  
56  
57  
58  
59  
60

For peer review only

1  
2 289442015  
3 289445018  
4 289446017  
5 289447014  
6 289448016  
7 289449012  
8 289449012  
9 289450012  
10 289451011  
11 289452016  
12 289515018  
13 289530010  
14 289530010  
15 289535017  
16 289536016  
17 289538015  
18 289542017  
19 289543010  
20 289543010  
21 289545015  
22 289546019  
23 289549014  
24 289550014  
25 289550014  
26 289553011  
27 289554017  
28 289557012  
29 289559010  
30 289561018  
31 289561018  
32 289565010  
33 289566011  
34 289571016  
35 289574012  
36 2896281000006114  
37 2896301000006113  
38 2896331000006117  
39 289781019  
40 289783016  
41 289784010  
42 289785011  
43 289786012  
44 289787015  
45 289789017  
46 289790014  
47 289791013  
48 289793011  
49 289904016  
50 2900601000006112  
51 2900611000006110  
52 2900621000006119  
53 2900631000006116  
54 2900641000006114  
55 2900651000006111  
56 2900661000006113  
57  
58  
59  
60

For peer review only

1  
2 2902211000006111  
3 2902221000006115  
4 2902231000006117  
5 2902531000006119  
6 2902541000006112  
7 2902551000006114  
8 2905761000006112  
9 2905771000006117  
10 2905781000006119  
11 2905791000006116  
12 2905801000006115  
13 290718013  
14 290732010  
15 290741017  
16 290749015  
17 290750015  
18 290751016  
19 290752011  
20 290753018  
21 290758010  
22 290768017  
23 290772018  
24 290773011  
25 290775016  
26 290776015  
27 290777012  
28 290778019  
29 290780013  
30 290782017  
31 290783010  
32 290784016  
33 290787011  
34 290788018  
35 290789014  
36 290791018  
37 290792013  
38 290793015  
39 290794014  
40 290804014  
41 290806011  
42 290808012  
43 290818019  
44 290819010  
45 290821017  
46 290822012  
47 290824013  
48 290825014  
49 290827018  
50 290830013  
51 290835015

For peer review only

1  
2 290836019  
3 290838018  
4 290839014  
5 290841010  
6 290843013  
7 290849012  
8 290851011  
9 290856018  
10 290865013  
11 290866014  
12 290867017  
13 290868010  
14 290889018  
15 290893012  
16 290894018  
17 290895017  
18 290896016  
19 290900018  
20 290901019  
21 291288013  
22 291289017  
23 291290014  
24 291293011  
25 291294017  
26 291295016  
27 291296015  
28 291297012  
29 291299010  
30 291300019  
31 291301015  
32 291302010  
33 291304011  
34 291306013  
35 291307016  
36 291320018  
37 291322014  
38 291326012  
39 291327015  
40 291328013  
41 291329017  
42 291330010  
43 291331014  
44 291332019  
45 291337013  
46 291343010  
47 291344016  
48 291347011  
49 291348018  
50 291356015  
51 291358019  
52  
53  
54  
55  
56  
57  
58  
59  
60

For peer review only

1  
2 291359010  
3 291360017  
4 291361018  
5 291362013  
6 291363015  
7 291364014  
8 291369016  
9 291372011  
10 291374012  
11 291375013  
12 291377017  
13 291378010  
14 291379019  
15 291380016  
16 291381017  
17 291383019  
18 291391011  
19 291395019  
20 291396018  
21 291398017  
22 291402014  
23 291403016  
24 2914071000006116  
25 291408013  
26 2914081000006118  
27 2914091000006115  
28 2914101000006114  
29 291411014  
30 291414018  
31 291418015  
32 291419011  
33 291425010  
34 291426011  
35 291427019  
36 291428012  
37 291429016  
38 291431013  
39 291433011  
40 291434017  
41 291435016  
42 291436015  
43 2914361000006113  
44 291437012  
45 291438019  
46 291439010  
47 291440012  
48 291441011  
49 291442016  
50 291443014  
51 291444015  
52  
53  
54  
55  
56  
57  
58  
59  
60

For peer review only

1  
2 291445019  
3 291446018  
4 291447010  
5 291448017  
6 291449013  
7 291450013  
8 291451012  
9 291452017  
10 291454016  
11 291461017  
12 291462012  
13 291464013  
14 291465014  
15 291470019  
16 291472010  
17 291474011  
18 291475012  
19 291476013  
20 291479018  
21 291480015  
22 291481016  
23 291482011  
24 291483018  
25 291484012  
26 291485013  
27 291486014  
28 291489019  
29 291490011  
30 291491010  
31 291492015  
32 291493013  
33 291495018  
34 291496017  
35 291508010  
36 291510012  
37 291515019  
38 291524011  
39 291525012  
40 291526013  
41 291528014  
42 291529018  
43 291530011  
44 291536017  
45 291538016  
46 291539012  
47 291540014  
48 291543011  
49 291544017  
50 291545016  
51 291547012  
52  
53  
54  
55  
56  
57  
58  
59  
60

For peer review only

1  
2 291548019  
3 291549010  
4 291551014  
5 291553012  
6 2915531000006111  
7  
8 291558015  
9 291559011  
10 291560018  
11 291563016  
12 291566012  
13 291571017  
14 291572012  
15 291574013  
16 291578011  
17 291579015  
18 291581018  
19 291587019  
20 291588012  
21 291604015  
22 291607010  
23 291617017  
24 291618010  
25 291622017  
26 291623010  
27 291624016  
28 291626019  
29 2916281000006118  
30 2916291000006115  
31 291630016  
32 291631017  
33 291635014  
34 291638011  
35 291641019  
36 291649017  
37 291650017  
38 291652013  
39 291653015  
40 291658012  
41 291659016  
42 291660014  
43 291661013  
44 291662018  
45 291663011  
46 291667012  
47 291668019  
48 291669010  
49 291671010  
50 291673013  
51 291674019  
52 291675018  
53  
54  
55  
56  
57  
58  
59  
60

For peer review only



1  
2 291676017  
3 291684018  
4 291685017  
5 291687013  
6 291688015  
7 291695012  
8 291698014  
9 291699018  
10 291700017  
11 291701018  
12 291702013  
13 291711013  
14 291712018  
15 291713011  
16 291714017  
17 291715016  
18 291718019  
19 291719010  
20 291721017  
21 291728011  
22 291730013  
23 291733010  
24 291734016  
25 291737011  
26 291739014  
27 291742015  
28 291748016  
29 291752016  
30 291765013  
31 291766014  
32 291778013  
33 291779017  
34 291780019  
35 291782010  
36 291783017  
37 291786013  
38 291787016  
39 291790010  
40 291791014  
41 291794018  
42 291795017  
43 291801014  
44 291808015  
45 291811019  
46 291815011  
47 291825018  
48 291828016  
49 2918291000006119  
50 291835012  
51 291836013

For peer review only

1  
2 291837016  
3 291843019  
4 291844013  
5 291846010  
6 291852011  
7 291853018  
8 291854012  
9 291855013  
10 291861011  
11 291864015  
12 291867010  
13 291880013  
14 291881012  
15 291886019  
16 2919531000006114  
17 2919541000006116  
18 291957016  
19 291964019  
20 291976019  
21 291977011  
22 292086018  
23 292094013  
24 292095014  
25 292096010  
26 292097018  
27 292099015  
28 292100011  
29 292101010  
30 292102015  
31 292105018  
32 292110019  
33 292111015  
34 292116013  
35 292118014  
36 292120012  
37 292121011  
38 292126018  
39 292127010  
40 292128017  
41 292132011  
42 292135013  
43 292136014  
44 292137017  
45 292138010  
46 292139019  
47 292142013  
48 292143015  
49 292146011  
50 292147019  
51 292148012

For peer review only

1  
2 292152012  
3 292154013  
4 292156010  
5 292158011  
6 292165015  
7 292166019  
8 292197015  
9 292199017  
10 292200019  
11 292201015  
12 292202010  
13 292203017  
14 292204011  
15 292206013  
16 292207016  
17 292208014  
18 292212015  
19 292213013  
20 292214019  
21 2922171000006119  
22 292275013  
23 292747012  
24 2928221000006110  
25 2930481000006112  
26 2930491000006110  
27 2930501000006119  
28 2930511000006116  
29 2930521000006112  
30 2930531000006110  
31 2930541000006117  
32 2930561000006118  
33 293369012  
34 2933691000006118  
35 2933701000006118  
36 2933711000006115  
37 2933721000006111  
38 2933731000006114  
39 2933741000006116  
40 293376019  
41 2933951000006116  
42 2933961000006119  
43 2933971000006114  
44 2934011000006115  
45 2934021000006111  
46 2947001000006110  
47 2950221000006113  
48 2952051000006114  
49 2952061000006111  
50 2952071000006116  
51 2952081000006118

For peer review only

1  
2 2953231000006118  
3 2954341000006118  
4 2954351000006116  
5 2954751000006115  
6 2954761000006118  
7  
8 2955231000006119  
9 2958641000006118  
10 2960301000006117  
11 2960311000006119  
12 2960321000006110  
13 2960331000006113  
14 2960341000006115  
15 2960351000006118  
16 2964691000006114  
17 2964701000006114  
18 2964711000006112  
19 2964731000006118  
20 2964741000006111  
21 2964751000006113  
22 2965671000006114  
23 297015017  
24 297117011  
25 297149011  
26 2971579012  
27 2972241000006117  
28 2972251000006115  
29 2972261000006118  
30 2972271000006113  
31 2972281000006111  
32 2972301000006110  
33 297441018  
34 297463010  
35 297583014  
36 297584015  
37 297592012  
38 297670018  
39 297901016  
40 2979601000006113  
41 2979611000006111  
42 2985501000006118  
43 2985511000006115  
44 298757016  
45 298762015  
46 298769012  
47 2987751000006115  
48 2987761000006118  
49 2989331000006118  
50 2989341000006111  
51 2989361000006110  
52 299173011

For peer review only

1  
2 2991911000006111  
3 2991921000006115  
4 2991931000006117  
5 2992261000006111  
6 2992271000006116  
7 2992281000006118  
8 2992291000006115  
9 2992301000006119  
10 2992311000006116  
11 2992321000006112  
12 2992331000006110  
13 299306010  
14 2993821000006111  
15 299401016  
16 2994171000006119  
17 2994181000006116  
18 2994191000006118  
19 2994201000006115  
20 2994211000006117  
21 2994221000006113  
22 2994811000006118  
23 2994821000006114  
24 2994831000006112  
25 2995091000006115  
26 2995101000006114  
27 299581000000117  
28 2998491000006119  
29 2998501000006110  
30 3001921000006115  
31 3001931000006117  
32 3004471000006113  
33 3004481000006111  
34 3004491000006114  
35 3004501000006118  
36 3004511000006115  
37 3004521000006111  
38 3004531000006114  
39 3004541000006116  
40 3005991000006116  
41 3006001000006115  
42 3006011000006117  
43 3006031000006111  
44 3006041000006118  
45 3007021000006111  
46 3010051000006116  
47 3010061000006119  
48 3010071000006114  
49 3010081000006112  
50 3010091000006110  
51 3010101000006116

For peer review only

1  
2 3010111000006118  
3 3010121000006114  
4 30108100000115  
5 3012081000006111  
6 3015941000006111  
7 3015951000006113  
8 3015961000006110  
9 3015971000006115  
10 3016451000006112  
11 3016461000006114  
12 3019621000006112  
13 3019631000006110  
14 3019641000006117  
15 3022391000006118  
16 3022721000006116  
17 3022731000006118  
18 3022741000006111  
19 3023731000006114  
20 3023741000006116  
21 3023751000006119  
22 3023761000006117  
23 3028701000006111  
24 3028711000006114  
25 3029921000006111  
26 3030841000006117  
27 3030851000006115  
28 3033861000006112  
29 3033871000006117  
30 3033881000006119  
31 3033891000006116  
32 3033901000006117  
33 3033911000006119  
34 304036011  
35 304071000006110  
36 3042031000006118  
37 3042041000006111  
38 304211000006113  
39 304221000006117  
40 304251000006114  
41 304259014  
42 304271000006116  
43 304461000006112  
44 304471000006117  
45 304481000006119  
46 304491000006116  
47 304501000006112  
48 304521000006119  
49 304531000006116  
50 304551000006111  
51 304621000006115

For peer review only

1  
2 304631000006117  
3 304641000006110  
4 304651000006112  
5 304661000006114  
6 304681000006116  
7 304701000006118  
8 304711000006115  
9 304731000006114  
10 304771000006112  
11 304781000006110  
12 304791000006113  
13 304901000006115  
14 304921000006113  
15 3049381000006112  
16 304941000006118  
17 305011000006117  
18 305021000006113  
19 305041000006118  
20 305051000006116  
21 305081000006112  
22 305101000006116  
23 305111000006118  
24 305171000006110  
25 305181000006113  
26 305201000006114  
27 305211000006112  
28 305231000006118  
29 305261000006110  
30 305268019  
31 305269010  
32 305271000006115  
33 305291000006119  
34 305301000006118  
35 3053291000006116  
36 3053301000006115  
37 305331000006114  
38 3053331000006111  
39 305351000006119  
40 305371000006112  
41 305531000006115  
42 305551000006110  
43 305571000006117  
44 305621000006119  
45 305631000006116  
46 305651000006111  
47 305671000006118  
48 305681000006115  
49 305701000006117  
50 305711000006119  
51 305721000006110

For peer review only

1  
2 305731000006113  
3 305741000006115  
4 305791000006112  
5 305801000006113  
6 305831000006117  
7 305841000006110  
8 305861000006114  
9 305901000006119  
10 305921000006112  
11 305941000006117  
12 305951000006115  
13 305971000006113  
14 306081000006118  
15 306091000006115  
16 306111000006112  
17 306131000006118  
18 306151000006113  
19 306161000006110  
20 306211000006118  
21 306221000006114  
22 306261000006115  
23 306361000006113  
24 306381000006115  
25 306401000006115  
26 306451000006116  
27 306571000006113  
28 306641000006116  
29 306651000006119  
30 306661000006117  
31 306681000006110  
32 306691000006113  
33 306721000006115  
34 306751000006112  
35 306771000006119  
36 3067781000006111  
37 3067791000006114  
38 3067801000006110  
39 3067811000006113  
40 3067821000006117  
41 306821000006110  
42 3068321000006114  
43 306861000006116  
44 306871000006111  
45 3068711000006117  
46 306881000006114  
47 306901000006111  
48 306941000006113  
49 307001000006112  
50 307051000006111  
51 307071000006118

For peer review only



1  
2 307081000006115  
3 307091000006117  
4 307131000006115  
5 307191000006116  
6 307251000006119  
7 307271000006112  
8 307281000006110  
9 307291000006113  
10 307301000006114  
11 307321000006116  
12 3073391000006113  
13 3073401000006110  
14 3073411000006113  
15 3073421000006117  
16 307441000006115  
17 3075101000006117  
18 3075111000006119  
19 3075121000006110  
20 3075131000006113  
21 3075141000006115  
22 3075151000006118  
23 3075161000006116  
24 3075171000006111  
25 307521000006114  
26 307531000006112  
27 307541000006119  
28 307551000006117  
29 307561000006115  
30 307571000006110  
31 307601000006115  
32 307611000006117  
33 307631000006111  
34 307671000006114  
35 307711000006113  
36 3077541000006115  
37 3077551000006118  
38 3077561000006116  
39 3077571000006111  
40 3077581000006114  
41 307801000006119  
42 307811000006116  
43 307821000006112  
44 307831000006110  
45 307841000006117  
46 3078421000006110  
47 307861000006118  
48 307891000006114  
49 307911000006111  
50 307921000006115  
51 307951000006112

For peer review only

1  
2 307971000006119  
3 308001000006111  
4 308031000006115  
5 308071000006117  
6 308091000006116  
7 308101000006110  
8 3081091000006118  
9 3081101000006112  
10 308111000006113  
11 3081111000006110  
12 3081121000006119  
13 308121000006117  
14 308181000006118  
15 308191000006115  
16 308201000006117  
17 308241000006115  
18 308261000006116  
19 308271000006111  
20 308291000006112  
21 308351000006112  
22 308361000006114  
23 308371000006119  
24 308381000006116  
25 308411000006118  
26 308461000006115  
27 308491000006111  
28 308501000006115  
29 3085201000006117  
30 3085211000006119  
31 308551000006116  
32 308641000006117  
33 308671000006113  
34 308701000006114  
35 308731000006118  
36 308761000006110  
37 308771000006115  
38 308811000006115  
39 308821000006111  
40 308841000006116  
41 308851000006119  
42 308861000006117  
43 308871000006112  
44 308941000006114  
45 308951000006111  
46 308961000006113  
47 308971000006118  
48 309041000006115  
49 309061000006116  
50 309071000006111  
51 309081000006114

For peer review only

1  
2 309091000006112  
3 309131000006114  
4 309211000006114  
5 309231000006115  
6 309251000006110  
7 309261000006112  
8 309281000006119  
9 309301000006115  
10 309311000006117  
11 309321000006113  
12 309351000006116  
13 309361000006119  
14 309381000006112  
15 309401000006112  
16 309431000006116  
17 309441000006114  
18 309451000006111  
19 309461000006113  
20 309471000006118  
21 309501000006113  
22 309511000006111  
23 309551000006112  
24 309561000006114  
25 309571000006119  
26 309581000006116  
27 309601000006114  
28 309641000006111  
29 309671000006115  
30 309701000006119  
31 309731000006110  
32 309741000006117  
33 309811000006113  
34 3098181000006114  
35 309851000006114  
36 309871000006116  
37 309891000006115  
38 3099301000006112  
39 3099311000006110  
40 3099321000006119  
41 309971000006110  
42 3101101000006116  
43 3101111000006118  
44 3101121000006114  
45 310161000006110  
46 3102251000006118  
47 3102261000006116  
48 3102271000006111  
49 310231000006112  
50 310241000006119  
51 310261000006115

For peer review only

1 310271000006110  
2 310281000006113  
3 310311000006110  
4 310321000006119  
5 310341000006114  
6 310361000006113  
7 310371000006118  
8 310391000006117  
9 310411000006117  
10 310451000006116  
11 310491000006110  
12 310521000006112  
13 310531000006110  
14 310541000006117  
15 310571000006113  
16 310581000006111  
17 310601000006118  
18 310621000006111  
19 310661000006117  
20 310681000006110  
21 3107111000006111  
22 3107121000006115  
23 310731000006117  
24 310741000006110  
25 310791000006118  
26 310801000006117  
27 310861000006116  
28 310871000006111  
29 310891000006112  
30 310951000006110  
31 310959019  
32 310960012  
33 310961000006112  
34 310962016  
35 310963014  
36 310965019  
37 310969013  
38 310971000006117  
39 310971013  
40 310973011  
41 310975016  
42 310976015  
43 311061000006119  
44 311091000006110  
45 311111000006118  
46 3111611000006112  
47 3111891000006115  
48 311191000006111  
49 311211000006112  
50 311221000006116

For peer review only

1  
2 311271000006115  
3 311291000006119  
4 311301000006118  
5 311361000006117  
6 311391000006113  
7  
8 311551000006110  
9 311561000006112  
10 311571000006117  
11 311581000006119  
12 311591000006116  
13 311651000006111  
14 311951000006115  
15 311971000006113  
16  
17 311978010  
18 311979019  
19 311980016  
20 311981000006111  
21 311981017  
22 311982012  
23 311983019  
24 311984013  
25 311986010  
26 311987018  
27 311988011  
28 311989015  
29 311994015  
30 311995019  
31 311996018  
32 311997010  
33 311998017  
34 311999013  
35 312000019  
36 312001015  
37 312004011  
38 312005012  
39 312006013  
40 312008014  
41 312021000006118  
42 312031000006115  
43 312041000006113  
44 312051000006110  
45 312061000006112  
46 3120681000006117  
47 312071000006117  
48 312081000006119  
49 312101000006110  
50 312121000006117  
51 312141000006112  
52 312161000006111  
53 312161016  
54  
55  
56  
57  
58  
59  
60

For peer review only

1 312190010  
2  
3 312201000006117  
4 312241000006115  
5 312251000006118  
6 312281000006114  
7  
8 312291000006112  
9 312301000006113  
10 3123071000006117  
11 3123081000006119  
12 3123091000006116  
13 3123101000006110  
14 312311000006111  
15 3123111000006113  
16 3123121000006117  
17 3123141000006112  
18 3123151000006114  
19 312321000006115  
20 312331000006117  
21 312361000006114  
22 312391000006118  
23 312421000006114  
24 312441000006119  
25 312461000006115  
26 312491000006111  
27 312531000006111  
28 312541000006118  
29 312591000006110  
30 312601000006119  
31 312621000006112  
32 312631000006110  
33 3126931000006110  
34 312731000006118  
35 312741000006111  
36 312761000006110  
37 3127731000006111  
38 312781000006117  
39 3127821000006118  
40 3127831000006115  
41 312801000006118  
42 312841000006116  
43 312851000006119  
44 3128681000006119  
45 312871000006112  
46 312881000006110  
47 312911000006110  
48 312931000006116  
49 312951000006111  
50 313011000006118  
51 313021000006114  
52 313031000006112

For peer review only

1  
2 313041000006119  
3 313051000006117  
4 313111000006119  
5 313131000006113  
6 313161000006116  
7 313171000006111  
8 313191000006112  
9 3131931000006115  
10 313201000006110  
11 313211000006113  
12 313221000006117  
13 313241000006112  
14 313251000006114  
15 313261000006111  
16 3132791000006111  
17 313421000006118  
18 313441000006113  
19 3135001000006113  
20 313501000006112  
21 313521000006119  
22 313541000006114  
23 313561000006113  
24 313601000006113  
25 3136271000006118  
26 3136281000006115  
27 313651000006112  
28 3136631000006119  
29 3136641000006112  
30 313691000006118  
31 313701000006118  
32 313711000006115  
33 313751000006119  
34 313761000006117  
35 313791000006113  
36 313801000006114  
37 313831000006118  
38 313851000006113  
39 313868017  
40 313874017  
41 313931000006111  
42 3139811000006115  
43 3139821000006111  
44 3139831000006114  
45 3139841000006116  
46 3139851000006119  
47 3139861000006117  
48 3139871000006112  
49 3139881000006110  
50 3139891000006113  
51 314001000006118

For peer review only

1  
2 314021000006111  
3 314051000006119  
4 314071000006112  
5 314081000006110  
6 314091000006113  
7  
8 314111000006116  
9 314121000006112  
10 314141000006117  
11 314171000006113  
12  
13 3142001000006118  
14 314201000006112  
15 3142011000006115  
16 3142071000006112  
17 314211000006110  
18 314231000006116  
19 314241000006114  
20 314251000006111  
21 314261000006113  
22 314281000006115  
23 314311000006118  
24 314321000006114  
25 314351000006117  
26 3143851000006116  
27 3143861000006119  
28 3143871000006114  
29 314401000006113  
30 314411000006111  
31 314421000006115  
32 314441000006110  
33 314451000006112  
34 314501000006114  
35 314551000006113  
36 314581000006117  
37 314621000006117  
38 314661000006111  
39 314671000006116  
40 314691000006115  
41 314701000006115  
42 314711000006117  
43 3147481000006118  
44 3147491000006115  
45 314791000006110  
46 314811000006114  
47 314851000006110  
48 314881000006119  
49 314891000006116  
50 314911000006119  
51 314921000006110  
52 314971000006111  
53 314991000006112

For peer review only



1  
2 315011000006119  
3 315031000006113  
4 315071000006111  
5 315101000006118  
6 315131000006114  
7 315161000006117  
8 315211000006114  
9 315221000006118  
10 315231000006115  
11 315251000006110  
12 315261000006112  
13 315291000006116  
14 315301000006115  
15 315321000006113  
16 315331000006111  
17 315341000006118  
18 315491000006117  
19 315501000006113  
20 315511000006111  
21 315531000006117  
22 315541000006110  
23 315581000006116  
24 315611000006112  
25 315621000006116  
26 315631000006118  
27 3156401000006114  
28 3156421000006116  
29 3156431000006118  
30 315651000006113  
31 315681000006117  
32 315721000006112  
33 315741000006117  
34 315751000006115  
35 315771000006113  
36 315781000006111  
37 315861000006111  
38 315871000006116  
39 315881000006118  
40 3159241000006116  
41 3159251000006119  
42 316001000006112  
43 316011000006110  
44 316031000006116  
45 316041000006114  
46 316111000006114  
47 316121000006118  
48 316131000006115  
49 316141000006113  
50 316181000006119  
51 316201000006118

For peer review only

1  
2 316211000006115  
3 316221000006111  
4 316291000006113  
5 316301000006114  
6 316311000006112  
7 316331000006118  
8 316351000006113  
9 316381000006117  
10 316401000006117  
11 316431000006113  
12 316441000006115  
13 316451000006118  
14 316461000006116  
15 316471000006111  
16 316491000006112  
17 316511000006118  
18 316531000006112  
19 316591000006111  
20 316611000006117  
21 316631000006111  
22 316691000006110  
23 316701000006110  
24 316741000006112  
25 316761000006111  
26 316791000006115  
27 316801000006119  
28 316821000006112  
29 316831000006110  
30 316851000006115  
31 316871000006113  
32 316881000006111  
33 316891000006114  
34 316931000006117  
35 316951000006112  
36 316961000006114  
37 3169661000006113  
38 316971000006119  
39 31698014  
40 317001000006114  
41 317021000006116  
42 317041000006111  
43 317051000006113  
44 3170631000006119  
45 3170641000006112  
46 3170651000006114  
47 3170661000006111  
48 3170671000006116  
49 317131000006117  
50 317141000006110  
51 317161000006114

For peer review only

1  
2 317191000006118  
3 317201000006115  
4 317261000006119  
5 317271000006114  
6 317341000006113  
7 317351000006110  
8 317361000006112  
9 317411000006116  
10 317421000006112  
11 317431000006110  
12 317441000006117  
13 317451000006115  
14 317501000006118  
15 3175581000006112  
16 317581000006110  
17 317611000006119  
18 317651000006118  
19 317671000006111  
20 317691000006112  
21 317721000006119  
22 317731000006116  
23 317821000006114  
24 317871000006110  
25 317901000006110  
26 317921000006117  
27 317931000006119  
28 317941000006112  
29 317951000006114  
30 317961000006111  
31 317991000006115  
32 318001000006113  
33 318011000006111  
34 3180111000006111  
35 3180121000006115  
36 3180131000006117  
37 3180141000006110  
38 318051000006112  
39 318081000006116  
40 318101000006112  
41 318141000006114  
42 318181000006115  
43 318191000006117  
44 318211000006116  
45 318231000006110  
46 318241000006117  
47 318261000006118  
48 3183401000006110  
49 3183601000006112  
50 3186671000006113  
51 3188651000006116

For peer review only

1 3188671000006114  
2 3188681000006112  
3 3188691000006110  
4 3188701000006110  
5 318991000006119  
6 319001000006119  
7 3195401000006110  
8 3195411000006113  
9 3197611000006117  
10 3197621000006113  
11 3198781000006117  
12 3198791000006119  
13 3198801000006118  
14 3198811000006115  
15 3198821000006111  
16 3198831000006114  
17 3211111000006118  
18 3211151000006117  
19 3211851000006112  
20 3216591000006111  
21 3216601000006115  
22 3216611000006117  
23 3217331000006115  
24 3217341000006113  
25 3217361000006112  
26 3217421000006112  
27 3217431000006110  
28 321861000006116  
29 321871000006111  
30 3219021000006112  
31 3221981000006119  
32 3221991000006116  
33 3222001000006119  
34 3222011000006116  
35 3222041000006117  
36 3222051000006115  
37 322511000006113  
38 322521000006117  
39 3226021000006111  
40 3226031000006114  
41 3226041000006116  
42 3226051000006119  
43 3226061000006117  
44 3226071000006112  
45 3226401000006113  
46 3226411000006111  
47 3227231000006119  
48 3227241000006112  
49 3227251000006114  
50 3228851000006114

For peer review only

1 3228861000006111  
2 3228871000006116  
3 3232761000006118  
4 3232771000006113  
5 3232781000006111  
6 3234021000006117  
7 3234031000006119  
8 3234041000006112  
9 3234051000006114  
10 3234061000006111  
11 3234071000006116  
12 3234081000006118  
13 3234091000006115  
14 3234101000006114  
15 3234111000006112  
16 3234121000006116  
17 3234131000006118  
18 3238841000006110  
19 324069016  
20 3240901000006116  
21 3252201000006112  
22 3252211000006110  
23 3252221000006119  
24 3252231000006116  
25 3252241000006114  
26 3252251000006111  
27 3252261000006113  
28 3254841000006116  
29 3254851000006119  
30 3254861000006117  
31 3254871000006112  
32 3254881000006110  
33 3254891000006113  
34 3255201000006118  
35 3261731000006112  
36 3261741000006119  
37 3264441000006114  
38 3264451000006111  
39 3264471000006118  
40 3264481000006115  
41 3264491000006117  
42 3264681000006117  
43 3284101000006116  
44 3284111000006118  
45 3284121000006114  
46 3284131000006112  
47 3285721000006114  
48 3285731000006112  
49 3285741000006119  
50 3285751000006117

For peer review only

1 3285761000006115  
2 3285771000006110  
3 3285791000006111  
4 3285801000006112  
5 328581000006116  
6 3285811000006110  
7 328741000006117  
8 3292101000006111  
9 3293531000006117  
10 3299771000006111  
11 3299781000006114  
12 3299791000006112  
13 3299801000006113  
14 3299811000006111  
15 330401000006113  
16 330639014  
17 3308471000006116  
18 3308481000006118  
19 3308491000006115  
20 3308511000006114  
21 3308521000006118  
22 3312291000006119  
23 3316471000006115  
24 3323021000006110  
25 3330021000006115  
26 3330031000006117  
27 3330041000006110  
28 3330051000006112  
29 3333861000006113  
30 3333871000006118  
31 3333881000006115  
32 3333891000006117  
33 3336471000006114  
34 3336911000006114  
35 3338771000006115  
36 3338781000006117  
37 3338791000006119  
38 3338911000006110  
39 3338921000006119  
40 3338931000006116  
41 3338941000006114  
42 3343541000006113  
43 3345711000006115  
44 3345721000006111  
45 3345731000006114  
46 3346141000006112  
47 3346441000006119  
48 3350991000006118  
49 3351001000006117  
50 3351011000006119

For peer review only

1  
2 3351021000006110  
3 3351031000006113  
4 3351041000006115  
5 335843013  
6 3364751000006111  
7 3364761000006113  
8 3364771000006118  
9 3364781000006115  
10 3368051000006115  
11 3369481000006110  
12 3370061000006111  
13 3375351000006116  
14 3375361000006119  
15 3377951000006114  
16 3377961000006111  
17 3377971000006116  
18 3377981000006118  
19 3377991000006115  
20 3378001000006113  
21 3380961000006117  
22 3383331000006119  
23 3383341000006112  
24 3383351000006114  
25 3383361000006111  
26 3387071000006114  
27 3387081000006112  
28 3388321000006112  
29 3388331000006110  
30 3394031000006116  
31 3394281000006110  
32 3398261000006112  
33 3398271000006117  
34 3398461000006113  
35 3398591000006118  
36 3398601000006114  
37 3398611000006112  
38 3398621000006116  
39 3398631000006118  
40 3398771000006113  
41 3398781000006111  
42 340421000006119  
43 3404331000006111  
44 3404341000006118  
45 340511000006111  
46 340541000006110  
47 340561000006114  
48 3406611000006116  
49 3406621000006112  
50 3406631000006110  
51 3406641000006117

For peer review only

1 3408821000006112  
2 3416681000006113  
3 3416691000006111  
4 3417691000006113  
5 3417701000006113  
6 3417711000006111  
7 3418911000006113  
8 341965018  
9 3420501000006112  
10 3420511000006110  
11 3420521000006119  
12 3420531000006116  
13 3422131000006112  
14 342807011  
15 342834014  
16 342851019  
17 3428621000006117  
18 3434381000006116  
19 3434401000006116  
20 3434561000006119  
21 3435751000006114  
22 3435761000006111  
23 3435771000006116  
24 3435791000006115  
25 3435941000006110  
26 3435951000006112  
27 3437891000006118  
28 3437901000006119  
29 3443161000006112  
30 3443171000006117  
31 3444851000006118  
32 3444861000006116  
33 3446351000006115  
34 3446711000006115  
35 3457851000006113  
36 3457861000006110  
37 3461481000006118  
38 3461501000006111  
39 3461511000006114  
40 3462271000006111  
41 3464151000006115  
42 3464161000006118  
43 3466821000006112  
44 3466841000006117  
45 3466871000006113  
46 3466881000006111  
47 3466891000006114  
48 3467831000006112  
49 3479091000006118  
50 3479101000006112

For peer review only



1  
2 3479111000006110  
3 3479121000006119  
4 3479131000006116  
5 3479981000006117  
6 3479991000006119  
7  
8 3480001000006113  
9 3480011000006111  
10 3483481000006117  
11 3484451000006110  
12 3492821000006113  
13 3494641000006114  
14 3494651000006111  
15 3494671000006118  
16  
17 350661000006112  
18 3508581000006116  
19 3508601000006114  
20 350891000006117  
21 3511981000006117  
22 3511991000006119  
23 3512001000006117  
24 3512011000006119  
25 3514081000006118  
26 3514091000006115  
27 351561000006117  
28 351571000006112  
29 3516121000006110  
30 3516131000006113  
31 3516141000006115  
32 3518181000006113  
33 3518191000006111  
34 3518201000006114  
35 3518223019  
36 3519021000006116  
37 3519071000006115  
38 3519101000006113  
39 3519261000006119  
40 3519271000006114  
41 3519281000006112  
42 3519291000006110  
43 3519301000006111  
44 352061000006117  
45 352151000006115  
46 352301000006116  
47 352391000006111  
48 352621000006117  
49 3527891000006114  
50 3527901000006113  
51 3527911000006111  
52 352831000006115  
53 3530721000006115

For peer review only

1  
2 3530731000006117  
3 3530741000006110  
4 3530751000006112  
5 353141000006114  
6 353181000006115  
7 3534781000006112  
8 3534801000006111  
9 3534841000006113  
10 3534941000006115  
11 3534951000006118  
12 3534961000006116  
13 3534971000006111  
14 3534981000006114  
15 353561000006116  
16 353751000006110  
17 353772013  
18 353861000006119  
19 354051000006110  
20 3540651000006115  
21 3541581000006115  
22 354341016  
23 354343018  
24 3544191000006110  
25 3544201000006113  
26 354425018  
27 354426017  
28 354521013  
29 354571000006114  
30 3549071000006114  
31 3549251000006113  
32 3549261000006110  
33 3549271000006115  
34 355091000006117  
35 355331000006118  
36 3553591000006116  
37 355381000006117  
38 355531000006112  
39 355535015  
40 355536019  
41 355537011  
42 355581000000118  
43 355661000006119  
44 355671000006114  
45 355711000006113  
46 35572018  
47 3559191000006114  
48 3559201000006112  
49 3561311000006114  
50 3561321000006118  
51 3567381000006110

For peer review only

1  
2 3567391000006113  
3 3568251000006114  
4 357001000006115  
5 357211000006112  
6 357561000006112  
7 3577041000006113  
8 3577061000006112  
9 3577071000006117  
10 3577081000006119  
11 3580871000006115  
12 3580881000006117  
13 3581621000006112  
14 3581631000006110  
15 3581641000006117  
16 3581651000006115  
17 3581661000006118  
18 358301000006119  
19 358331000006110  
20 358404011  
21 358471000006117  
22 358781000006110  
23 358791000006113  
24 3591861000006118  
25 3591871000006113  
26 3591891000006114  
27 3591901000006113  
28 3592381000006111  
29 3592391000006114  
30 3592401000006111  
31 359271000006110  
32 359281000006113  
33 359291000006111  
34 3594381000006119  
35 359459016  
36 3603191000006113  
37 3603201000006111  
38 3612301000006111  
39 3614221000006117  
40 3614571000006118  
41 3616461000006119  
42 3616471000006114  
43 3619421000006119  
44 3620201000006112  
45 3620211000006110  
46 3620221000006119  
47 3621151000006111  
48 3622621000006116  
49 3622631000006118  
50 3626831000006118  
51 3627301000006117

For peer review only

1  
2 3628711000006119  
3 3628721000006110  
4 3628791000006112  
5 3630631000006117  
6 363511000006114  
7 363521000006118  
8 3636643017  
9 3636644011  
10 3636954012  
11 3641061000006111  
12 3641071000006116  
13 3644991000006118  
14 3647371000006113  
15 3647391000006114  
16 3647401000006111  
17 365231000000114  
18 365651000000117  
19 3658451000006113  
20 3658461000006110  
21 3658491000006119  
22 3659761000006112  
23 3659771000006117  
24 3659781000006119  
25 366011000000119  
26 3660131000006115  
27 3660141000006113  
28 3662121000006119  
29 3662131000006116  
30 3662141000006114  
31 3662151000006111  
32 3662161000006113  
33 3662171000006118  
34 3662181000006115  
35 3662191000006117  
36 3662201000006119  
37 3662211000006116  
38 3662221000006112  
39 3662231000006110  
40 3662241000006117  
41 3662411000006115  
42 3662431000006114  
43 3671061000006110  
44 3671071000006115  
45 3674171000006116  
46 3674181000006118  
47 3674191000006115  
48 3674201000006117  
49 3674221000006110  
50 3674231000006113  
51 3674241000006115

For peer review only

1  
2 3678231000006119  
3 3678241000006112  
4 3678791000006113  
5 3678801000006114  
6 3678811000006112  
7 3678821000006116  
8 3678831000006118  
9 3678841000006111  
10 3678851000006113  
11 3678861000006110  
12 3678871000006115  
13 3678881000006117  
14 3683521000006119  
15 3685901000006116  
16 3685911000006118  
17 3685921000006114  
18 3686581000006113  
19 3686591000006111  
20 3687101000006113  
21 3687771000006118  
22 3695141000006115  
23 3695151000006118  
24 3695161000006116  
25 3697811000006117  
26 3697821000006113  
27 3697831000006111  
28 3697841000006118  
29 3697851000006116  
30 3697861000006119  
31 3699291000006117  
32 3699301000006116  
33 3699311000006118  
34 3699321000006114  
35 370111000006119  
36 370161000006116  
37 370171000006111  
38 370201000006110  
39 3702781000006112  
40 3703771000006117  
41 3703781000006119  
42 3704012  
43 3707501000006111  
44 3707511000006114  
45 3707521000006118  
46 3707531000006115  
47 3708791000006113  
48 3708801000006114  
49 3708811000006112  
50 3709541000006117  
51 3709551000006115

For peer review only

1 3709561000006118  
2 3709571000006113  
3 3709581000006111  
4 3709591000006114  
5 3709601000006118  
6 3709611000006115  
7 3709621000006111  
8 3709631000006114  
9 3711491000006112  
10 3711501000006116  
11 3711511000006118  
12 3714981000006118  
13 3714991000006115  
14 3718101000006115  
15 3721291000006116  
16 3722811000006117  
17 3722821000006113  
18 3722831000006111  
19 3722841000006118  
20 3722851000006116  
21 3724731000006113  
22 3724741000006115  
23 3734751000006115  
24 3734761000006118  
25 3734771000006113  
26 3734781000006111  
27 3735761000006117  
28 3735771000006112  
29 3735781000006110  
30 3735791000006113  
31 3735801000006114  
32 3735811000006112  
33 3735821000006116  
34 3735831000006118  
35 3735841000006111  
36 3735851000006113  
37 3737091000006118  
38 3737101000006112  
39 3741301000006118  
40 3741871000006119  
41 3745771000006113  
42 3745791000006114  
43 3745801000006110  
44 3750471000006112  
45 3750481000006110  
46 3750491000006113  
47 3752561000006117  
48 3752591000006113  
49 3752601000006117  
50 3756761000006114

For peer review only

1  
2 3756771000006119  
3 3756781000006116  
4 3756791000006118  
5 3759331000006111  
6 3759341000006118  
7 3759351000006116  
8 3759361000006119  
9 3759991000006111  
10 3760001000006118  
11 3763421000006110  
12 3763431000006113  
13 3763441000006115  
14 3766851000006113  
15 3766861000006110  
16 3766871000006115  
17 3766881000006117  
18 3766901000006115  
19 3766911000006117  
20 3766921000006113  
21 376769011  
22 376791000006111  
23 376842018  
24 376843011  
25 376848019  
26 376849010  
27 376870016  
28 376938017  
29 376939013  
30 3771831000006118  
31 3771841000006111  
32 3771851000006113  
33 3771861000006110  
34 3773701000006119  
35 3773711000006116  
36 3773721000006112  
37 3773731000006110  
38 3773741000006117  
39 3775781000006112  
40 3776181000006115  
41 378182015  
42 3782101000006115  
43 378528014  
44 378529018  
45 378691015  
46 3787041000006119  
47 3787051000006117  
48 378851016  
49 378881000000114  
50 3789351000006112  
51 3789361000006114

For peer review only

1  
2 379088010  
3 379089019  
4 379223011  
5 379246013  
6 379315011  
7 379770011  
8 380059013  
9 380092019  
10 380093012  
11 380094018  
12 380095017  
13 380110012  
14 380129018  
15 380137014  
16 380139012  
17 380145016  
18 380146015  
19 380180017  
20 380193010  
21 3802001000006115  
22 380206018  
23 380211016  
24 380242014  
25 3802491000006115  
26 3812911000006119  
27 3812921000006110  
28 3820851000006117  
29 3820861000006115  
30 3824461000006113  
31 3827371000006116  
32 3827381000006118  
33 3827391000006115  
34 3827401000006118  
35 3827411000006115  
36 3827421000006111  
37 3828101000006111  
38 3828111000006114  
39 3828121000006118  
40 3828131000006115  
41 3832091000006117  
42 3832101000006111  
43 3832111000006114  
44 3835461000006114  
45 3835471000006119  
46 3835481000006116  
47 3835491000006118  
48 3838051000006113  
49 3838061000006110  
50 3838081000006117  
51 3843581000006117  
52  
53  
54  
55  
56  
57  
58  
59  
60

For peer review only



1  
2 3845541000006112  
3 3845551000006114  
4 3845561000006111  
5 3845571000006116  
6 3845591000006115  
7  
8 3851331000006114  
9 3851361000006117  
10 3851371000006112  
11 3852661000006118  
12  
13 3852671000006113  
14 3852681000006111  
15 3852691000006114  
16 3852701000006114  
17 3854301000006116  
18 3854311000006118  
19  
20 3854321000006114  
21 3854331000006112  
22 3855041000006115  
23 3855061000006116  
24 3855071000006111  
25 3855431000006116  
26 3855441000006114  
27 3855461000006113  
28  
29 3858291000006114  
30 3858311000006113  
31 3858321000006117  
32 3865661000006115  
33 3865671000006110  
34 3865681000006113  
35 3865781000006119  
36 3865791000006116  
37 3865801000006115  
38 3865811000006117  
39 387151000006114  
40 387171000006116  
41 3873481000006117  
42 3873491000006119  
43 3873501000006110  
44 387551000006116  
45 3875711000006119  
46 3877151000006110  
47 3877161000006112  
48 3877171000006117  
49 3877181000006119  
50 388171000006115  
51 3882431000006115  
52 3882441000006113  
53 3882451000006110  
54 3882461000006112  
55 388991000006116  
56  
57  
58  
59  
60

For peer review only

1  
2 3891081000006116  
3 3891091000006118  
4 3891101000006112  
5 3891111000006110  
6 3891121000006119  
7 3891131000006116  
8 3891141000006114  
9 3897081000006111  
10 3897091000006114  
11 3897101000006115  
12 3897111000006117  
13 3898741000006115  
14 3898751000006118  
15 3898761000006116  
16 3898771000006111  
17 3898781000006114  
18 3898791000006112  
19 3898801000006113  
20 3898811000006111  
21 3898821000006115  
22 3898831000006117  
23 3898841000006110  
24 3898851000006112  
25 3898861000006114  
26 3898871000006119  
27 3902291000006114  
28 3902301000006110  
29 3902311000006113  
30 3902321000006117  
31 3903141000006117  
32 3907641000006117  
33 3908461000006119  
34 3908471000006114  
35 3908481000006112  
36 3908491000006110  
37 3908501000006119  
38 3908511000006116  
39 3908521000006112  
40 3908531000006110  
41 3908541000006117  
42 3908551000006115  
43 3908561000006118  
44 3920291000006118  
45 3920301000006117  
46 3920311000006119  
47 3926021000006110  
48 3929811000006119  
49 3929841000006115  
50 3931301000006114  
51 3931411000006119

For peer review only

1  
2 3933091000006116  
3 3934021000006116  
4 3934051000006113  
5 3934061000006110  
6 3934071000006115  
7 3936561000006112  
8 3936571000006117  
9 3936591000006116  
10 3939831000006111  
11 3944811000006117  
12 3944821000006113  
13 3944831000006111  
14 3944841000006118  
15 3944851000006116  
16 3944861000006119  
17 3944871000006114  
18 3944881000006112  
19 3948111000006116  
20 3953661000006119  
21 3956771000006112  
22 3956781000006110  
23 3956791000006113  
24 3958781000006114  
25 3958791000006112  
26 3959661000006116  
27 3959671000006111  
28 396091000006118  
29 3961011000006115  
30 3961031000006114  
31 3961041000006116  
32 3961051000006119  
33 396111000006110  
34 396121000006119  
35 396131000006116  
36 3961571000006115  
37 3961581000006117  
38 3961591000006119  
39 3961601000006110  
40 396161000006113  
41 3961611000006113  
42 396171000006118  
43 396191000006117  
44 396251000006115  
45 396281000006111  
46 3962951000006114  
47 3962961000006111  
48 3962971000006116  
49 3962981000006118  
50 3962991000006115  
51 3963001000006119

For peer review only

1  
2 396301000006110  
3 3963011000006116  
4 3963021000006112  
5 3963031000006110  
6 3963041000006117  
7 3963051000006115  
8 3963061000006118  
9 396381000006118  
10 396461000006117  
11 396471000006112  
12 396481000006110  
13 396491000006113  
14 396501000006117  
15 396511000006119  
16 396521000006110  
17 396531000006113  
18 396541000006115  
19 396551000006118  
20 396561000006116  
21 396571000006111  
22 396581000006114  
23 396591000006112  
24 396601000006116  
25 396611000006118  
26 396631000006112  
27 396641000006119  
28 396651000006117  
29 3967601000006115  
30 3967611000006117  
31 3967621000006113  
32 3974511000006118  
33 3974521000006114  
34 398291000006110  
35 398366019  
36 398367011  
37 398873019  
38 399051000006116  
39 399447011  
40 399621000006119  
41 399681000006115  
42 399811000006111  
43 4005241000006117  
44 4005711000006114  
45 4005731000006115  
46 4005901000006114  
47 4005911000006112  
48 4005971000006115  
49 4005981000006117  
50 4006001000006118  
51 4006091000006113

For peer review only

1  
2 4006111000006116  
3 4006121000006112  
4 4006141000006117  
5 4006161000006118  
6 4006171000006113  
7 4006181000006111  
8 4006251000006111  
9 4006261000006113  
10 4006321000006114  
11 4006361000006115  
12 4006371000006110  
13 4006431000006117  
14 4006471000006119  
15 4006571000006115  
16 4006581000006117  
17 4006591000006119  
18 4006611000006113  
19 4006671000006116  
20 4006721000006113  
21 4006741000006118  
22 4006791000006110  
23 4006821000006118  
24 4006891000006116  
25 4006901000006117  
26 4006911000006119  
27 4006951000006118  
28 4007001000006116  
29 4007011000006118  
30 4007031000006112  
31 4007151000006118  
32 4007281000006118  
33 4007411000006114  
34 4007421000006118  
35 4007441000006113  
36 4007501000006112  
37 4007531000006116  
38 4007551000006111  
39 4007571000006118  
40 4007581000006115  
41 4007601000006113  
42 4007621000006115  
43 4007641000006110  
44 4007691000006118  
45 4007701000006118  
46 4007711000006115  
47 4007721000006111  
48 4007761000006117  
49 4007771000006112  
50 4007781000006110  
51 4007811000006112

For peer review only

1 4007851000006113  
2 4007931000006111  
3 4007961000006119  
4 4008071000006111  
5 4008091000006112  
6 4008111000006115  
7 4008151000006119  
8 4008431000006116  
9 4008441000006114  
10 4008481000006115  
11 4008551000006112  
12 4008561000006114  
13 4008581000006116  
14 4008751000006115  
15 4008811000006113  
16 400882012  
17 400883019  
18 4008831000006119  
19 4008941000006119  
20 4008961000006115  
21 4009001000006111  
22 4009041000006113  
23 4009131000006119  
24 4009141000006112  
25 4009151000006114  
26 4009161000006111  
27 4009181000006118  
28 4009331000006117  
29 4009341000006110  
30 4009351000006112  
31 4009541000006118  
32 401562011  
33 4016651000006112  
34 4016721000006111  
35 4024291000006115  
36 4024431000006115  
37 4024441000006113  
38 4024451000006110  
39 4024501000006112  
40 4024631000006117  
41 4024671000006119  
42 4024691000006118  
43 4025111000006118  
44 4025411000006113  
45 4025431000006119  
46 4025471000006116  
47 4025551000006110  
48 4025571000006117  
49 4025601000006112  
50 4025671000006118

For peer review only

1  
2 4025681000006115  
3 4025711000006119  
4 4025751000006118  
5 4025791000006112  
6 4025841000006110  
7 4025861000006114  
8 4025931000006110  
9 4025991000006114  
10 4026031000006119  
11 4026111000006112  
12 4026181000006117  
13 4026251000006117  
14 4026261000006115  
15 4026331000006116  
16 4026491000006110  
17 4026501000006119  
18 4026511000006116  
19 4026521000006112  
20 4026641000006116  
21 4026681000006110  
22 4026951000006110  
23 4027021000006119  
24 4027041000006114  
25 4027071000006118  
26 4027191000006116  
27 4027231000006114  
28 4027261000006117  
29 4027291000006113  
30 4027341000006111  
31 4027361000006110  
32 4027381000006117  
33 4027531000006112  
34 4027561000006115  
35 4027611000006117  
36 4027671000006114  
37 4027691000006110  
38 4027731000006119  
39 4027801000006119  
40 4027831000006110  
41 4027871000006113  
42 4027961000006114  
43 4027991000006118  
44 4028011000006114  
45 4028031000006115  
46 4028071000006117  
47 4028121000006117  
48 4028161000006111  
49 4028181000006118  
50 4028211000006119  
51 4028231000006113

For peer review only

1 4028251000006118  
2 4028271000006111  
3 4028291000006112  
4 4028311000006111  
5 4028341000006110  
6 4028371000006119  
7 4028411000006118  
8 4028441000006119  
9 4028461000006115  
10 4028491000006111  
11 4028711000006112  
12 4028781000006117  
13 4028861000006117  
14 4028891000006113  
15 4028921000006119  
16 4029041000006115  
17 4029161000006117  
18 4029361000006119  
19 4029421000006119  
20 4029471000006118  
21 4029781000006111  
22 4029791000006114  
23 4029801000006110  
24 4029811000006113  
25 4030171000006115  
26 4030271000006110  
27 4030281000006113  
28 4030291000006111  
29 4030301000006112  
30 4030311000006110  
31 4031001000006115  
32 4031011000006117  
33 4031021000006113  
34 4031031000006111  
35 4031041000006118  
36 4031061000006119  
37 4031071000006114  
38 4031081000006112  
39 4031091000006110  
40 4031101000006116  
41 4031141000006119  
42 4031151000006117  
43 4031161000006115  
44 4031171000006110  
45 4031201000006114  
46 4031211000006112  
47 4031221000006116  
48 4031231000006118  
49 4031711000006119  
50 4031721000006110

For peer review only



1  
2 4032021000006118  
3 4032361000006114  
4 4032371000006119  
5 4032901000006112  
6 4032911000006110  
7  
8 4032931000006116  
9 4032941000006114  
10 4033321000006112  
11 4033331000006110  
12  
13 4033341000006117  
14 4033831000006118  
15 4033841000006111  
16 4033851000006113  
17 4033861000006110  
18  
19 4033891000006119  
20 4033901000006115  
21 4034021000006111  
22 4034031000006114  
23  
24 4034041000006116  
25 4034101000006119  
26 4034111000006116  
27 4034121000006112  
28 4034191000006114  
29  
30 4034201000006112  
31 4034211000006110  
32 4034221000006119  
33 4034231000006116  
34 4034241000006114  
35 4034361000006115  
36 4034421000006115  
37 4034431000006117  
38 4034441000006110  
39 4034451000006112  
40 4034461000006114  
41 4034471000006119  
42 4034481000006116  
43 4034491000006118  
44 4034561000006110  
45 4034571000006115  
46 4034581000006117  
47 4034591000006119  
48 4034891000006116  
49 4034901000006117  
50 4034921000006110  
51 4034931000006113  
52 4034941000006115  
53 4034951000006118  
54 4035171000006112  
55 4035181000006110  
56 4035191000006113  
57  
58  
59  
60

For peer review only

1  
2 4035201000006111  
3 4035211000006114  
4 4035221000006118  
5 4035241000006113  
6 4035251000006110  
7 4035261000006112  
8 4035271000006117  
9 4035281000006119  
10 4035291000006116  
11 4035331000006111  
12 4035341000006118  
13 4035351000006116  
14 4035361000006119  
15 4035371000006114  
16 4035381000006112  
17 4035391000006110  
18 4035451000006111  
19 4035461000006113  
20 4035471000006118  
21 4035711000006116  
22 4035731000006110  
23 4035741000006117  
24 4035751000006115  
25 4035761000006118  
26 4035771000006113  
27 4035781000006111  
28 4035801000006110  
29 4035811000006113  
30 4036471000006111  
31 4036481000006114  
32 4036491000006112  
33 4036501000006116  
34 4036581000006113  
35 4036591000006111  
36 4036641000006118  
37 4036651000006116  
38 403673017  
39 403674011  
40 403682011  
41 4036841000006117  
42 4036851000006115  
43 4036861000006118  
44 4036871000006113  
45 403688010  
46 4036881000006111  
47 403689019  
48 4036891000006114  
49 4036901000006113  
50 403691010  
51 4036911000006111

For peer review only

1  
2 4036921000006115  
3 403697014  
4 403698016  
5 403700013  
6 403701012  
7 403702017  
8 403704016  
9 403735010  
10 4037381000006119  
11 4037391000006116  
12 4037421000006112  
13 4037431000006110  
14 4037511000006115  
15 403752014  
16 4037521000006111  
17 403753016  
18 4037531000006114  
19 403754010  
20 4037541000006116  
21 403755011  
22 403757015  
23 403758013  
24 403760010  
25 403762019  
26 403771011  
27 4037801000006116  
28 4037811000006118  
29 4037821000006114  
30 4037831000006112  
31 4037841000006119  
32 4037851000006117  
33 4037871000006110  
34 4037881000006113  
35 4038061000006114  
36 4038071000006119  
37 4038081000006116  
38 4038091000006118  
39 4038101000006112  
40 4038311000006113  
41 4038321000006117  
42 4038371000006116  
43 4038381000006118  
44 4039011000006116  
45 4039211000006111  
46 4039431000006118  
47 4039611000006114  
48 4039691000006116  
49 4039701000006116  
50 4039711000006118  
51 4039721000006114

For peer review only

1  
2 4039731000006112  
3 4039741000006119  
4 4039751000006117  
5 4039761000006115  
6 4039781000006113  
7  
8 4039791000006111  
9 4039801000006112  
10 4040231000006113  
11 4040241000006115  
12  
13 4040561000006119  
14 4040571000006114  
15 4040601000006119  
16 4040611000006116  
17 4040621000006112  
18  
19 4040631000006110  
20 4040851000006119  
21 4040861000006117  
22 4040871000006112  
23  
24 4040881000006110  
25 4041001000006116  
26 4041011000006118  
27 4041021000006114  
28 4041031000006112  
29  
30 4041041000006119  
31 4041061000006115  
32 4041071000006110  
33 4041081000006113  
34 4041091000006111  
35  
36 4041371000006113  
37 4041481000006119  
38 4041491000006116  
39 4041501000006112  
40 4041881000006117  
41 4041891000006119  
42  
43 4041901000006115  
44 4041911000006117  
45 4041951000006116  
46 4041961000006119  
47  
48 4041971000006114  
49 4041981000006112  
50 4042021000006119  
51 4042031000006116  
52 4042041000006114  
53  
54 4042081000006115  
55 4042091000006117  
56 4042101000006111  
57 4042161000006112  
58 4042171000006117  
59 4042181000006119  
60 4042191000006116

For peer review only

1  
2 4042201000006118  
3 4042461000006116  
4 4042481000006114  
5 4045391000006111  
6 4045401000006113  
7 404801000006116  
8 405091000006115  
9 4052521000006112  
10 4052531000006110  
11 405501000006119  
12 406052010  
13 406054011  
14 406263015  
15 406265010  
16 406266011  
17 406281017  
18 406332017  
19 406333010  
20 406399011  
21 40641000006114  
22 406831000006117  
23 407801000000116  
24 4091191000006116  
25 4091221000006111  
26 409844012  
27 409845013  
28 410798015  
29 411225019  
30 411399019  
31 411465018  
32 41171000006115  
33 412051000006115  
34 413089014  
35 413202011  
36 413204012  
37 413205013  
38 413207017  
39 413210012  
40 413211011  
41 413216018  
42 414174013  
43 414230016  
44 414253015  
45 414849013  
46 4153551000006118  
47 4153561000006116  
48 4161771000006110  
49 4161781000006113  
50 4161801000006112  
51 4161811000006110

For peer review only

1  
2 4161821000006119  
3 4161831000006116  
4 4162001000006110  
5 4162981000006119  
6 4162991000006116  
7  
8 4163071000006114  
9 4163111000006118  
10 4163201000006114  
11 4163211000006112  
12 4163231000006118  
13 4163251000006113  
14 4163281000006117  
15 4163371000006112  
16 4163431000006119  
17 4163451000006114  
18 4163481000006118  
19 4163491000006115  
20 4163501000006111  
21 4163511000006114  
22 4163531000006115  
23 4163551000006110  
24 4163611000006110  
25 4163631000006116  
26 4169541000006111  
27 4170281000006118  
28 4170301000006119  
29 4170321000006112  
30 4170401000006111  
31 4170421000006118  
32 4170491000006116  
33 4170501000006112  
34 4170521000006119  
35 4170531000006116  
36 4170551000006111  
37 4170561000006113  
38 4170581000006115  
39 4170641000006110  
40 4170661000006114  
41 4170671000006119  
42 4170681000006116  
43 4170691000006118  
44 4170711000006115  
45 4170731000006114  
46 4170751000006119  
47 4170771000006112  
48 4170791000006113  
49 4170841000006111  
50 4170851000006113  
51 4171121000006117  
52 4171141000006112

For peer review only

1  
2 4171161000006111  
3 4171191000006115  
4 4171631000006110  
5 4171751000006113  
6 4172041000006118  
7 4172061000006119  
8 4172071000006114  
9 4172241000006111  
10 4172801000006113  
11 4172861000006114  
12 4173001000006110  
13 4173011000006113  
14 4173021000006117  
15 4173811000006119  
16 420481000006112  
17 4213071000006113  
18 4213081000006111  
19 4213091000006114  
20 4213101000006115  
21 4213111000006117  
22 4213121000006113  
23 4213131000006111  
24 4213141000006118  
25 4213161000006119  
26 4213401000006114  
27 4213421000006116  
28 422941000006114  
29 424694018  
30 424811000006114  
31 424992017  
32 424994016  
33 424998018  
34 424999014  
35 42511000033112  
36 4255441000006118  
37 4255451000006116  
38 4255461000006119  
39 4255491000006110  
40 4255511000006116  
41 4255521000006112  
42 4255531000006110  
43 4255541000006117  
44 4255561000006118  
45 4255571000006113  
46 4255591000006114  
47 4255601000006118  
48 4255631000006114  
49 4255641000006116  
50 4255681000006110  
51 4255691000006113

For peer review only

1 4255711000006111  
2 4255751000006112  
3 4255791000006118  
4 4255801000006117  
5 4255821000006110  
6 4255831000006113  
7 4255891000006112  
8 4255901000006111  
9 4255911000006114  
10 425771000006113  
11 425781000006111  
12 42611000033113  
13 4309891000006114  
14 4309901000006113  
15 4309911000006111  
16 4309921000006115  
17 4309931000006117  
18 4317311000006115  
19 4356671000006114  
20 4383051000006110  
21 4383061000006112  
22 4383071000006117  
23 4383081000006119  
24 4383091000006116  
25 4383101000006110  
26 4383151000006114  
27 4383161000006111  
28 4383171000006116  
29 4388391000006112  
30 4388411000006112  
31 4388771000006110  
32 4388781000006113  
33 4388791000006111  
34 4389291000006114  
35 4389301000006110  
36 4389311000006113  
37 4389431000006114  
38 4389441000006116  
39 4389451000006119  
40 4389821000006113  
41 4389831000006111  
42 4389841000006118  
43 4389851000006116  
44 4389861000006119  
45 4390021000006111  
46 4390031000006114  
47 4390041000006116  
48 4390821000006118  
49 4390831000006115  
50 4390841000006113

For peer review only



1  
2 4390851000006110  
3 4391201000006119  
4 4391221000006112  
5 4391241000006117  
6 4392351000006116  
7 4392361000006119  
8 4392371000006114  
9 4392381000006112  
10 4392391000006110  
11 4392411000006110  
12 4392421000006119  
13 4392461000006113  
14 4392471000006118  
15 4392481000006115  
16 4392491000006117  
17 4392501000006113  
18 4395061000006112  
19 4395071000006117  
20 4396721000006111  
21 4400181000006119  
22 4400191000006116  
23 4400201000006118  
24 4400211000006115  
25 4400221000006111  
26 4400231000006114  
27 4400331000006118  
28 4400341000006111  
29 4400371000006115  
30 4400381000006117  
31 4400401000006117  
32 4400441000006115  
33 4409441000006113  
34 4409451000006110  
35 4409461000006112  
36 4409471000006117  
37 4409481000006119  
38 4409491000006116  
39 4409501000006112  
40 4409511000006110  
41 4409521000006119  
42 4409531000006116  
43 4409541000006114  
44 4409551000006111  
45 4409561000006113  
46 441041000006116  
47 441141000006117  
48 4411971000006112  
49 4411981000006110  
50 4412001000006110  
51 441201000006112

For peer review only

1 4412761000006114  
2 4413191000006111  
3 4413981000006111  
4 4413991000006114  
5 4414001000006117  
6 4414011000006119  
7 4414031000006113  
8 4416071000006117  
9 4416161000006111  
10 4417601000006116  
11 4418001000006112  
12 4418121000006118  
13 4418131000006115  
14 4418141000006113  
15 4418151000006110  
16 4418161000006112  
17 4418181000006119  
18 4418191000006116  
19 4418201000006118  
20 4418211000006115  
21 4418221000006111  
22 4418231000006114  
23 4418241000006116  
24 4418251000006119  
25 4418261000006117  
26 4418271000006112  
27 4418281000006110  
28 4418291000006113  
29 4418301000006114  
30 4418311000006112  
31 4418321000006116  
32 4418331000006118  
33 4418341000006111  
34 4418351000006113  
35 4418361000006110  
36 4418371000006115  
37 4418381000006117  
38 4418401000006117  
39 4418411000006119  
40 4418441000006115  
41 4418451000006118  
42 4418481000006114  
43 4418491000006112  
44 4418501000006116  
45 4418511000006118  
46 4418541000006119  
47 4418561000006115  
48 4418571000006110  
49 4418671000006114  
50 4418681000006112

For peer review only

1  
2 4418701000006110  
3 4418711000006113  
4 4418721000006117  
5 4418741000006112  
6 4418751000006114  
7  
8 4418761000006111  
9 4418771000006116  
10 4419861000006112  
11 4419871000006117  
12 4419881000006119  
13 4419891000006116  
14 4419911000006119  
15 4419921000006110  
16 4421251000006116  
17 4421271000006114  
18  
19 444773019  
20 444834014  
21 446271000006110  
22 446281000006113  
23 4505481000006113  
24 4505491000006111  
25 450901012  
26 451081018  
27 451428019  
28 453241012  
29 453301018  
30 454085011  
31 454091013  
32 454201010  
33 455404011  
34 455405012  
35 456846015  
36 457109011  
37 457110018  
38 457111019  
39 457307018  
40 457318018  
41 457319014  
42 459378019  
43 459399016  
44 459501013  
45 459527013  
46 4596013  
47 459719019  
48 459732012  
49 4613511000006111  
50 4613531000006117  
51 4641101000006112  
52 4641121000006119  
53 4641131000006116  
54  
55  
56  
57  
58  
59  
60

For peer review only

1  
2 4641151000006111  
3 4641171000006118  
4 4641191000006117  
5 4641211000006116  
6 4641251000006115  
7  
8 4641351000006114  
9 4641361000006111  
10 4641381000006118  
11 4670841000006112  
12  
13 4670851000006114  
14 4673961000006113  
15 472961000000117  
16 473311000000110  
17 473369018  
18  
19 473991000000119  
20 4743781000006113  
21 4743791000006111  
22 4745221000006116  
23 4745231000006118  
24 4745241000006111  
25 4745251000006113  
26 4745261000006110  
27 4745301000006118  
28 4745311000006115  
29 4745321000006111  
30 4745331000006114  
31 4745341000006116  
32 4745351000006119  
33 4745381000006110  
34 4745391000006113  
35 4745411000006113  
36 4745421000006117  
37 4745441000006112  
38 4745451000006114  
39 4745461000006111  
40 4745471000006116  
41 4745481000006118  
42 4745491000006115  
43 4745501000006111  
44 4745511000006114  
45 4745551000006110  
46 4745571000006117  
47 4745621000006119  
48 4745641000006114  
49 4745651000006111  
50 4745661000006113  
51 4745681000006115  
52 4745691000006117  
53 4745711000006119  
54 4745721000006110

For peer review only

1  
2 4745741000006115  
3 4745761000006116  
4 4745781000006114  
5 4745801000006113  
6 4745821000006115  
7  
8 4745831000006117  
9 4745841000006110  
10 4745861000006114  
11 4745881000006116  
12  
13 4745891000006118  
14 4745901000006119  
15 4745931000006110  
16 4745941000006117  
17 4745951000006115  
18 4745961000006118  
19  
20 4745971000006113  
21 4745981000006111  
22 4746011000006113  
23 4746021000006117  
24 4746031000006119  
25 4746041000006112  
26 4746081000006118  
27 4746091000006115  
28 4746111000006112  
29 4746121000006116  
30 4746151000006113  
31 4746161000006110  
32 4746171000006115  
33 4746191000006119  
34 4746201000006116  
35 4746211000006118  
36 4746221000006114  
37 4746251000006117  
38 4746261000006115  
39 4746271000006110  
40 4746301000006112  
41 4746311000006110  
42 4746321000006119  
43 4746331000006116  
44 4746341000006114  
45 4746351000006111  
46 4746361000006113  
47 4746371000006118  
48 4746391000006117  
49 4746401000006115  
50 4746431000006111  
51 4746461000006119  
52 4746471000006114  
53 4746491000006110  
54 4746501000006119

For peer review only

1  
2 4746541000006117  
3 4746551000006115  
4 4746571000006113  
5 4746581000006111  
6 4746601000006118  
7 4746611000006115  
8 4746621000006111  
9 4746631000006114  
10 4746641000006116  
11 4746661000006117  
12 4746681000006110  
13 4746691000006113  
14 4746701000006113  
15 4746711000006111  
16 4746721000006115  
17 4746751000006112  
18 4746761000006114  
19 4746771000006119  
20 4746781000006116  
21 4746811000006119  
22 4746821000006110  
23 4746841000006115  
24 4746851000006118  
25 4746871000006111  
26 4746881000006114  
27 4746901000006111  
28 4746941000006113  
29 4746951000006110  
30 4746971000006117  
31 4746981000006119  
32 4746991000006116  
33 474703011  
34 4747031000006116  
35 4747041000006114  
36 4747061000006113  
37 4747081000006115  
38 4747101000006111  
39 4747111000006114  
40 4747141000006113  
41 4747151000006110  
42 4747171000006117  
43 4747261000006117  
44 4747281000006110  
45 4747311000006112  
46 4747321000006116  
47 4747341000006111  
48 4747351000006113  
49 4747371000006115  
50 4747381000006117  
51 4747391000006119

For peer review only

1  
2 4747401000006117  
3 4747431000006113  
4 4747451000006118  
5 4747501000006116  
6 4747541000006119  
7  
8 4747591000006111  
9 4747681000006112  
10 4747701000006110  
11 4747711000006113  
12  
13 4747741000006112  
14 4747751000006114  
15 4747771000006116  
16 4747781000006118  
17 4747791000006115  
18  
19 4747811000006116  
20 4747821000006112  
21 4747831000006110  
22 4747861000006118  
23 4747871000006113  
24  
25 4747901000006113  
26 4747921000006115  
27 4748061000006112  
28 4748181000006118  
29 4748231000006113  
30  
31 4748281000006114  
32 4748331000006117  
33 4748651000006115  
34 4748911000006110  
35 4748931000006116  
36 4748941000006114  
37 4748961000006113  
38 4748981000006115  
39  
40 4749171000006112  
41 4749341000006118  
42 4749431000006116  
43 4749451000006111  
44 4749501000006113  
45 4749761000006118  
46 4749771000006113  
47  
48 4749881000006118  
49 4749921000006114  
50 4749931000006112  
51 4749951000006117  
52 4749961000006115  
53 4749971000006110  
54 4749991000006111  
55 4750001000006111  
56 4750011000006114  
57 4750021000006118  
58 4750031000006115  
59  
60

For peer review only

1  
2 4750051000006110  
3 4750061000006112  
4 4750071000006117  
5 4750091000006116  
6 4750101000006110  
7  
8 4750111000006113  
9 4750131000006119  
10 4750141000006112  
11 4750161000006111  
12 4750171000006116  
13 4750181000006118  
14 4750191000006115  
15 4750201000006117  
16 4750221000006110  
17 4750231000006113  
18 4750271000006111  
19 4750281000006114  
20 4750301000006113  
21 4750321000006115  
22 4750341000006110  
23 4750351000006112  
24 4750361000006114  
25 4750381000006116  
26 4750401000006116  
27 4750411000006118  
28 4750421000006114  
29 4750431000006112  
30 4750441000006119  
31 4750461000006115  
32 4750501000006115  
33 4750521000006113  
34 4750531000006111  
35 4750551000006116  
36 4750601000006119  
37 4750621000006112  
38 4750651000006115  
39 4750711000006112  
40 4750721000006116  
41 4750771000006115  
42 4750781000006117  
43 4750881000006110  
44 4751011000006118  
45 4751071000006110  
46 4751081000006113  
47 4751131000006113  
48 4751141000006115  
49 4751161000006116  
50 4751171000006111  
51 4751301000006119  
52 4751311000006116

For peer review only



1  
2 4751321000006112  
3 4751331000006110  
4 4751341000006117  
5 4752881000006111  
6 4755801000006111  
7 4755991000006112  
8 4756261000006118  
9 4757001000006110  
10 4757011000006113  
11 4757021000006117  
12 4757031000006119  
13 4757051000006114  
14 4757231000006112  
15 4757241000006119  
16 4757251000006117  
17 4757261000006115  
18 4757301000006112  
19 4757311000006110  
20 4757321000006119  
21 4757441000006118  
22 4758631000006113  
23 4769111000006114  
24 4770721000006119  
25 4779091000006113  
26 4819961000006110  
27 4820271000006112  
28 4821071000006111  
29 482537012  
30 482641017  
31 482690017  
32 482691018  
33 482730011  
34 482731010  
35 482732015  
36 482733013  
37 482734019  
38 482737014  
39 482740014  
40 482741013  
41 4829241000006112  
42 4829711000006115  
43 485870016  
44 4908911000006112  
45 494336018  
46 495731000000114  
47 5028061000006116  
48 5028071000006111  
49 5093451000006111  
50 510029018  
51 510045016

For peer review only

1 510061019  
2 510074013  
3 510113012  
4 5109371000006119  
5 5109381000006116  
6 5109391000006118  
7 511250010  
8 511385013  
9 51216011  
10 51325019  
11 5141031000006112  
12 514881000000112  
13 514941000000113  
14 517221000000116  
15 517341000000116  
16 517421000000115  
17 517661000000114  
18 525371000006119  
19 525391000006118  
20 531851000006119  
21 531861000006117  
22 5324051000006110  
23 5324061000006112  
24 5324071000006117  
25 5324081000006119  
26 5324201000006117  
27 5324491000006111  
28 5325181000006119  
29 5325191000006116  
30 5325351000006113  
31 5325561000006115  
32 5325571000006110  
33 533321000006119  
34 5336451000006114  
35 5340261000006111  
36 5340271000006116  
37 5340291000006115  
38 5340301000006119  
39 5340311000006116  
40 5340321000006112  
41 5343061000006111  
42 5343071000006116  
43 5343091000006115  
44 5343101000006114  
45 5343111000006112  
46 5343121000006116  
47 5343131000006118  
48 5344681000006113  
49 5344691000006111  
50 5344701000006111

For peer review only

1  
2 5344711000006114  
3 5344721000006118  
4 5344731000006115  
5 5344741000006113  
6 5344791000006116  
7  
8 5345241000006118  
9 5346461000006110  
10 5347121000006111  
11 5347161000006117  
12 5347171000006112  
13 5347211000006114  
14 5347221000006118  
15 5347301000006115  
16 5347601000006114  
17 5347611000006112  
18 5347621000006116  
19 5347631000006118  
20 5347731000006110  
21 5347751000006115  
22 5347761000006118  
23 5347771000006113  
24 5347781000006111  
25 5347831000006119  
26 5347841000006112  
27 5348521000006116  
28 5348531000006118  
29 5348541000006111  
30 5348551000006113  
31 5351161000006113  
32 5351181000006115  
33 5351491000006113  
34 5351501000006117  
35 5351511000006119  
36 5351521000006110  
37 5351531000006113  
38 535221000006113  
39 5352591000006118  
40 5353081000006115  
41 5353091000006117  
42 5353101000006111  
43 5353111000006114  
44 5353161000006112  
45 535331000006115  
46 5353931000006117  
47 5353941000006110  
48 5354481000006112  
49 5355201000006117  
50 5355211000006119  
51 5355221000006110  
52 5355231000006113

For peer review only

1 5355241000006115  
2 5355251000006118  
3 5355261000006116  
4 5355271000006111  
5 5355361000006114  
6 5355381000006116  
7 5355391000006118  
8 535541000006116  
9 5355601000006119  
10 5355751000006113  
11 5355791000006119  
12 5356031000006112  
13 5356051000006117  
14 5356621000006115  
15 535711000006110  
16 535731000006116  
17 535981000006118  
18 536081000006111  
19 536301000006117  
20 536561000006111  
21 536641000006113  
22 536651000006110  
23 536751000006117  
24 536981000006110  
25 536991000006113  
26 537001000006117  
27 537011000006119  
28 537021000006110  
29 537051000006118  
30 543041000006111  
31 543111000006111  
32 543481000006111  
33 543771000006118  
34 543811000006118  
35 544411000006119  
36 5499111000006111  
37 5499131000006117  
38 5499151000006112  
39 5499171000006119  
40 5499191000006118  
41 5500611000006115  
42 5501461000006111  
43 5503871000006115  
44 5503881000006117  
45 5503911000006117  
46 5505961000006115  
47 5505981000006113  
48 5506011000006110  
49 5506021000006119  
50 5506031000006116

For peer review only

1  
2 5506051000006111  
3 5506061000006113  
4 5506071000006118  
5 5511561000006114  
6 5511581000006116  
7 5511591000006118  
8 5511601000006114  
9 5511611000006112  
10 5511621000006116  
11 5511621000006116  
12 5511671000006115  
13 5511681000006117  
14 5511691000006119  
15 5523391000006118  
16 5523431000006112  
17 552511000006110  
18 5526171000006110  
19 5526181000006113  
20 5526191000006111  
21 5526201000006114  
22 5526211000006112  
23 5526221000006116  
24 5526231000006118  
25 5526241000006111  
26 5526251000006113  
27 552641000006110  
28 552661000006114  
29 5560011000006114  
30 556501000000116  
31 556511000000119  
32 5567511000006116  
33 5567521000006112  
34 5567531000006110  
35 5572871000006116  
36 5572881000006118  
37 557371000006110  
38 557381000006113  
39 557391000006111  
40 557401000006113  
41 557411000006111  
42 5579641000006115  
43 5579661000006116  
44 5579671000006111  
45 5579681000006114  
46 5579691000006112  
47 5579701000006112  
48 5579711000006110  
49 5590681000006113  
50 5590691000006111  
51 5591731000006111  
52 5591761000006119

For peer review only

1 5591791000006110  
2 5591801000006111  
3 5591821000006118  
4 5591831000006115  
5 5591851000006110  
6 5591861000006112  
7 5591871000006117  
8 5591881000006119  
9 5595371000006112  
10 5595381000006110  
11 560131000000110  
12 560151000000115  
13 5601531000006114  
14 5601541000006116  
15 560201000000113  
16 5602071000006112  
17 5602081000006110  
18 5608261000006111  
19 5608271000006116  
20 5645721000006112  
21 5645731000006110  
22 5704031000006110  
23 5707081000006118  
24 5707101000006114  
25 5707151000006113  
26 5707161000006110  
27 5723731000006119  
28 5726761000006117  
29 5726781000006110  
30 573501000006117  
31 573611000006118  
32 5778961000006119  
33 5778971000006114  
34 5900061000006117  
35 5911401000006116  
36 5911411000006118  
37 5911421000006114  
38 5911431000006112  
39 5911441000006119  
40 5911451000006117  
41 5911771000006115  
42 5911781000006117  
43 5911801000006118  
44 5912131000006112  
45 5912141000006119  
46 5912151000006117  
47 5912161000006115  
48 5912171000006110  
49 5912991000006114  
50 5913031000006119

For peer review only

1  
2 5915541000006116  
3 5969991000006119  
4 5970011000006113  
5 5970261000006115  
6 59846018  
7  
8 598561000000110  
9 598801000000114  
10 59921000006116  
11 604681000006112  
12 6051931000006117  
13 6052161000006116  
14 6053471000006110  
15 6053491000006111  
16 6056051000006116  
17 606941000006115  
18 622681000000119  
19 62349016  
20 62350016  
21 62351017  
22 6242751000006114  
23 6242761000006111  
24 6242781000006118  
25 6242811000006116  
26 6242821000006112  
27 6242831000006110  
28 6242841000006117  
29 6242861000006118  
30 6242871000006113  
31 6242881000006111  
32 6242891000006114  
33 6242901000006113  
34 6242911000006111  
35 6242921000006115  
36 6242941000006110  
37 6242951000006112  
38 6242961000006114  
39 6242971000006119  
40 6242981000006116  
41 6243001000006117  
42 6243011000006119  
43 6243031000006113  
44 6243041000006115  
45 6243051000006118  
46 6243071000006111  
47 6243091000006112  
48 6243101000006118  
49 6243111000006115  
50 6243131000006114  
51 6243141000006116  
52 6243151000006119

For peer review only

1  
2 6243161000006117  
3 6243171000006112  
4 6243181000006110  
5 6243191000006113  
6 6243241000006113  
7 6243261000006112  
8 6243291000006116  
9 6243301000006115  
10 6243371000006114  
11 6243381000006112  
12 6243391000006110  
13 6243401000006112  
14 6243411000006110  
15 6243421000006119  
16 6243441000006114  
17 6243491000006117  
18 6243501000006113  
19 6243511000006111  
20 6243541000006110  
21 6243551000006112  
22 6243561000006114  
23 6243591000006118  
24 6243601000006114  
25 6243611000006112  
26 6243621000006116  
27 6243641000006111  
28 6243651000006113  
29 6243661000006110  
30 6243671000006115  
31 6243691000006119  
32 6243701000006119  
33 6243711000006116  
34 6243721000006112  
35 6243731000006110  
36 6243741000006117  
37 6243761000006118  
38 6243771000006113  
39 6243791000006114  
40 6243821000006117  
41 6243831000006119  
42 6243841000006112  
43 6243851000006114  
44 6243861000006111  
45 6243881000006118  
46 6243891000006115  
47 6243901000006116  
48 6243911000006118  
49 6243921000006114  
50 6243931000006112  
51 6243941000006119

For peer review only



1  
2 6243951000006117  
3 6243961000006115  
4 6243971000006110  
5 6243981000006113  
6 6243991000006111  
7  
8 6244001000006119  
9 6244011000006116  
10 6244021000006112  
11 6244031000006110  
12 6244041000006117  
13  
14 6244051000006115  
15 6244071000006113  
16 6244081000006111  
17 6244091000006114  
18  
19 6244101000006115  
20 6244111000006117  
21 6244121000006113  
22 6244141000006118  
23 6244151000006116  
24 6244161000006119  
25 6244171000006114  
26 6244181000006112  
27 6244191000006110  
28 6244201000006113  
29 6244211000006111  
30 6244221000006115  
31 6244231000006117  
32 6244241000006110  
33 6244251000006112  
34 6244261000006114  
35 6244271000006119  
36 6244281000006116  
37 6244291000006118  
38 6244311000006119  
39 6244321000006110  
40 6244331000006113  
41 6244351000006118  
42 6244361000006116  
43 6244371000006111  
44 6244381000006114  
45 6244401000006114  
46 6244411000006112  
47 6244421000006116  
48 6244431000006118  
49 6244441000006111  
50 6244451000006113  
51 6244471000006115  
52 6244481000006117  
53 6244491000006119  
54 6244501000006110

For peer review only

1 6244511000006113  
2 6244541000006112  
3 6244561000006111  
4 6244571000006116  
5 6244581000006118  
6 6244591000006115  
7 6244601000006111  
8 6244611000006114  
9 6244621000006118  
10 6244631000006115  
11 6244641000006113  
12 6244671000006117  
13 6244691000006116  
14 6244701000006116  
15 6244711000006118  
16 6244731000006112  
17 6244741000006119  
18 6244751000006117  
19 6244761000006115  
20 6244771000006110  
21 6244781000006113  
22 6244791000006111  
23 6244801000006112  
24 6244811000006110  
25 6244821000006119  
26 6244831000006116  
27 6244851000006111  
28 6244871000006118  
29 6244881000006115  
30 6244891000006117  
31 6244901000006118  
32 6244911000006115  
33 6244931000006114  
34 6244941000006116  
35 6244951000006119  
36 6244971000006112  
37 6244991000006113  
38 6245001000006118  
39 6245011000006115  
40 6245031000006114  
41 6245061000006117  
42 6245081000006110  
43 6245101000006119  
44 6245111000006116  
45 6245131000006110  
46 6245151000006115  
47 6245161000006118  
48 6245171000006113  
49 6245181000006111  
50 6245201000006112

For peer review only

1  
2 6245211000006110  
3 6245221000006119  
4 6245231000006116  
5 6245251000006111  
6 6245271000006118  
7  
8 6245281000006115  
9 6245291000006117  
10 6245301000006116  
11 6245321000006114  
12 6245341000006119  
13  
14 6245351000006117  
15 6245361000006115  
16 6245381000006113  
17 6245391000006111  
18 6245401000006113  
19  
20 6245411000006111  
21 6245421000006115  
22 6245441000006110  
23 6245451000006112  
24 6245461000006114  
25 6245491000006118  
26 6245501000006114  
27 6245511000006112  
28 6245521000006116  
29 6245541000006111  
30 6245551000006113  
31 6245561000006110  
32 6245571000006115  
33 6245581000006117  
34 6245591000006119  
35 6245601000006110  
36 6245611000006113  
37 6245621000006117  
38 6245631000006119  
39 6245651000006114  
40 6245661000006111  
41 6245671000006116  
42 6245681000006118  
43 6245701000006115  
44 6245711000006117  
45 6245721000006113  
46 6245731000006111  
47 6245741000006118  
48 6245751000006116  
49 6245781000006112  
50 6245791000006110  
51 6245801000006111  
52 6245811000006114  
53 6245821000006118  
54 6245831000006115

For peer review only

1 6245841000006113  
2 6245861000006112  
3 6245871000006117  
4 6245881000006119  
5 6245891000006116  
6 6245901000006117  
7 6245921000006110  
8 6245931000006113  
9 6245941000006115  
10 6245951000006118  
11 6245961000006116  
12 6245971000006111  
13 6245981000006114  
14 6245991000006112  
15 6246001000006113  
16 6246011000006111  
17 6246021000006115  
18 6246031000006117  
19 6246051000006112  
20 6246061000006114  
21 6246081000006116  
22 6246091000006118  
23 6246121000006119  
24 6246131000006116  
25 6246151000006111  
26 6246161000006113  
27 6246171000006118  
28 6246191000006117  
29 6246201000006119  
30 6246241000006117  
31 6246251000006115  
32 6246261000006118  
33 6246271000006113  
34 6246281000006111  
35 6246301000006110  
36 6246311000006113  
37 6246321000006117  
38 6246331000006119  
39 6246341000006112  
40 6246351000006114  
41 6246361000006111  
42 6246371000006116  
43 6246381000006118  
44 6246391000006115  
45 6246401000006118  
46 6246411000006115  
47 6246421000006111  
48 6246431000006114  
49 6246441000006116  
50 6246451000006119

For peer review only

1  
2 6246461000006117  
3 6246471000006112  
4 6246481000006110  
5 6246501000006117  
6 6246511000006119  
7  
8 6246531000006113  
9 6246541000006115  
10 6246551000006118  
11 6246561000006116  
12  
13 6246571000006111  
14 6246581000006114  
15 6246591000006112  
16 6246601000006116  
17 6246611000006118  
18  
19 6246621000006114  
20 6246631000006112  
21 6246651000006117  
22 6246661000006115  
23  
24 6246671000006110  
25 6246681000006113  
26 6246691000006111  
27 6246701000006111  
28 6246711000006114  
29  
30 6246721000006118  
31 6246731000006115  
32 6246741000006113  
33 6246751000006110  
34 6246761000006112  
35  
36 6246771000006117  
37 6246781000006119  
38 6246791000006116  
39 6246801000006115  
40 6246881000006112  
41 6246891000006110  
42  
43 6246901000006114  
44 6246931000006118  
45 6246951000006113  
46 6246961000006110  
47  
48 6246971000006115  
49 6246981000006117  
50 6246991000006119  
51 6247001000006110  
52 6247011000006113  
53  
54 6247021000006117  
55 6247031000006119  
56 6247041000006112  
57 6247051000006114  
58 6247061000006111  
59 6247071000006116  
60 6247081000006118

For peer review only

1 6247091000006115  
2 6247101000006114  
3 6247291000006111  
4 6247301000006112  
5 6247311000006110  
6 6247321000006119  
7 6247331000006116  
8 6247341000006114  
9 6247351000006111  
10 6247361000006113  
11 6247371000006118  
12 6247381000006115  
13 6247431000006111  
14 6247451000006116  
15 6247461000006119  
16 6247471000006114  
17 6247551000006115  
18 6247561000006118  
19 6247571000006113  
20 6247591000006114  
21 6247661000006117  
22 6247671000006112  
23 6247681000006110  
24 6247701000006113  
25 6247711000006111  
26 6247721000006115  
27 6247731000006117  
28 6247741000006110  
29 6247751000006112  
30 6247761000006114  
31 6247771000006119  
32 6247781000006116  
33 6247791000006118  
34 6247801000006117  
35 6247811000006119  
36 6247821000006110  
37 6247831000006113  
38 6247841000006115  
39 6247851000006118  
40 6247871000006111  
41 6247881000006114  
42 6247891000006112  
43 6247901000006111  
44 6247911000006114  
45 6247931000006115  
46 6247941000006113  
47 6247961000006112  
48 6247971000006117  
49 6248051000006113  
50 6248061000006110

For peer review only

1  
2 6248091000006119  
3 6248101000006113  
4 6248111000006111  
5 6248121000006115  
6 6248131000006117  
7 6248191000006118  
8 6248201000006115  
9 6248211000006117  
10 6248221000006113  
11 6248231000006111  
12 6248241000006118  
13 6250431000006110  
14 62561000000111  
15 62821000000118  
16 6300131000006118  
17 6300141000006111  
18 6331111000006112  
19 6331141000006111  
20 633341000006117  
21 6362181000006119  
22 6362191000006116  
23 6362211000006115  
24 6362221000006111  
25 6362301000006114  
26 6362311000006112  
27 6362321000006116  
28 6362341000006111  
29 6362351000006113  
30 6362361000006110  
31 6362371000006115  
32 6362381000006117  
33 6362481000006114  
34 6362531000006112  
35 6362541000006119  
36 6363601000006114  
37 6363611000006112  
38 6363631000006118  
39 6363641000006111  
40 6363661000006110  
41 6363951000006117  
42 6364031000006110  
43 6364061000006118  
44 6364091000006114  
45 6364401000006114  
46 6364411000006112  
47 6364471000006115  
48 6364531000006119  
49 6364541000006112  
50 6364691000006116  
51 6364841000006114

For peer review only

1 6377241000006110  
2 638721000000113  
3 638821000000118  
4 638841000000113  
5 6411000033115  
6 641301000000114  
7 643521000006115  
8 6461711000006114  
9 6461721000006118  
10 6461731000006115  
11 6461751000006110  
12 6461761000006112  
13 6461771000006117  
14 647651000006119  
15 6478621000006110  
16 6478631000006113  
17 6478641000006115  
18 6478651000006118  
19 6478661000006116  
20 6478671000006111  
21 6481041000006112  
22 6481051000006114  
23 6481061000006111  
24 6481191000006119  
25 6481201000006116  
26 6481211000006118  
27 650001000006114  
28 651081000006111  
29 6551781000006115  
30 6557191000006111  
31 6557231000006118  
32 6557241000006111  
33 6611411000006117  
34 6611421000006113  
35 6611431000006111  
36 6616721000006113  
37 6616731000006111  
38 6616741000006118  
39 6616751000006116  
40 6616761000006119  
41 6620961000006112  
42 6620971000006117  
43 6620981000006119  
44 6621001000006115  
45 6631771000006113  
46 6632101000006112  
47 6632121000006119  
48 6632561000006116  
49 6632581000006114  
50 6633061000006117

For peer review only



1  
2 6633201000006112  
3 6635341000006115  
4 6635361000006116  
5 6635471000006115  
6 6635791000006111  
7 6670291000006110  
8 6682641000006111  
9 6691671000006111  
10 6691681000006114  
11 6691691000006112  
12 6691701000006112  
13 6692551000006113  
14 6711000033112  
15 6719331000006114  
16 6719341000006116  
17 6719351000006119  
18 6719361000006117  
19 6719371000006112  
20 6719391000006113  
21 6719401000006110  
22 6719411000006113  
23 677251000006118  
24 677861000006117  
25 677871000006112  
26 677881000006110  
27 678501000006119  
28 678521000006112  
29 679461000006112  
30 679471000006117  
31 680761000006117  
32 682691000006117  
33 6830821000006117  
34 6830861000006111  
35 6830901000006116  
36 6830921000006114  
37 6845831000006112  
38 6861851000006110  
39 6861871000006117  
40 6886631000006112  
41 6893931000006111  
42 6895451000006111  
43 6895461000006113  
44 6895471000006118  
45 6895481000006115  
46 6906531000006119  
47 6908591000006119  
48 6909731000006119  
49 6909741000006112  
50 6931041000006119  
51 6948581000006111

For peer review only

1 6948591000006114  
2 6948601000006118  
3 6948611000006115  
4 6955711000006116  
5 6955721000006112  
6 695991000006116  
7 6968521000006115  
8 700141000006113  
9 7005001000006119  
10 7005021000006112  
11 702131000006116  
12 704711000006119  
13 705211000006111  
14 7083431000006116  
15 7083441000006114  
16 7087461000006119  
17 7087471000006114  
18 7092901000006112  
19 7093841000006111  
20 7105791000006115  
21 7105801000006119  
22 711081000006111  
23 711111000006117  
24 711121000006113  
25 711171000006114  
26 711181000006112  
27 71291000006110  
28 71331000006115  
29 71351000006110  
30 71371000006117  
31 714661000000115  
32 716861000006117  
33 716911000006110  
34 717021000006115  
35 719021000006111  
36 719931000006113  
37 720001000006119  
38 720011000006116  
39 720021000006112  
40 720031000006110  
41 720041000006117  
42 720051000006115  
43 720161000006119  
44 720341000006115  
45 720451000006113  
46 720461000006110  
47 720471000006115  
48 720481000006117  
49 720491000006119  
50 720501000006110

For peer review only

1  
2 720511000006113  
3 720521000006117  
4 720531000006119  
5 720561000006111  
6 720571000006116  
7 720581000006118  
8 720591000006115  
9 720631000006115  
10 720761000006115  
11 720791000006111  
12 720801000006112  
13 720951000006119  
14 720961000006117  
15 720991000006113  
16 721041000006111  
17 721051000006113  
18 721091000006119  
19 721171000006119  
20 721271000006114  
21 721291000006110  
22 721311000006114  
23 721351000006110  
24 721361000006112  
25 721391000006116  
26 721421000006112  
27 721481000006111  
28 721601000006117  
29 721621000006110  
30 721701000006112  
31 721721000006119  
32 721751000006111  
33 721821000006114  
34 721851000006117  
35 721871000006110  
36 721881000006113  
37 721961000006111  
38 721991000006115  
39 722341000006119  
40 722361000006115  
41 722421000006115  
42 722441000006110  
43 722471000006119  
44 722481000006116  
45 722511000006112  
46 722521000006116  
47 722541000006111  
48 7227221000006112  
49 722761000006119  
50 722871000006117  
51 722901000006117

For peer review only

1 722911000006119  
2 722961000006116  
3 722981000006114  
4 723001000006113  
5 723031000006117  
6 723111000006110  
7 723221000006112  
8 723281000006111  
9 723301000006110  
10 723321000006117  
11 723341000006112  
12 723391000006115  
13 723401000006118  
14 723441000006116  
15 723451000006119  
16 723501000006117  
17 723541000006115  
18 723571000006111  
19 723601000006116  
20 723641000006119  
21 723801000006115  
22 723951000006113  
23 724051000006110  
24 724311000006111  
25 724401000006116  
26 724411000006118  
27 724421000006114  
28 7246031000006118  
29 7246041000006111  
30 7246061000006110  
31 724621000006112  
32 724641000006117  
33 724671000006113  
34 724681000006111  
35 724721000006116  
36 724761000006110  
37 724781000006117  
38 724791000006119  
39 724841000006116  
40 724881000006110  
41 724891000006113  
42 724901000006112  
43 725101000006111  
44 725121000006118  
45 725151000006110  
46 725191000006116  
47 725221000006111  
48 725241000006116  
49 725271000006112  
50 725451000006118

For peer review only

1  
2 725611000006117  
3 725711000006113  
4 725761000006111  
5 725771000006116  
6 725811000006116  
7 725861000006118  
8 725951000006112  
9 726021000006110  
10 726071000006111  
11 7260711000006119  
12 7260721000006110  
13 7260731000006113  
14 726141000006116  
15 726201000006111  
16 726261000006112  
17 726271000006117  
18 726331000006111  
19 726351000006116  
20 726361000006119  
21 726371000006114  
22 726561000006114  
23 726631000006118  
24 726641000006111  
25 727151000006117  
26 727181000006113  
27 7272621000006110  
28 727281000006117  
29 727321000006111  
30 727381000006110  
31 727511000006114  
32 727521000006118  
33 727531000006115  
34 727561000006112  
35 7276151000006113  
36 727731000006113  
37 727761000006116  
38 727771000006111  
39 727781000006114  
40 727791000006112  
41 727841000006110  
42 727911000006116  
43 7279491000006117  
44 7281251000006119  
45 728201000006110  
46 728451000006110  
47 728461000006112  
48 728471000006117  
49 728481000006119  
50 728491000006116  
51 729281000006113

For peer review only

1  
2 729291000006111  
3 729301000006112  
4 729311000006110  
5 729321000006119  
6 729331000006116  
7 729341000006114  
8 729351000006111  
9 729361000006113  
10 729371000006118  
11 729381000006115  
12 729391000006117  
13 729401000006115  
14 729411000006117  
15 729421000006113  
16 729431000006111  
17 729441000006118  
18 729451000006116  
19 729461000006119  
20 729471000006114  
21 729481000006112  
22 729491000006110  
23 729501000006119  
24 729511000006116  
25 729521000006112  
26 729531000006110  
27 729541000006117  
28 729551000006115  
29 729561000006118  
30 729571000006113  
31 729581000006111  
32 729591000006114  
33 729601000006118  
34 729611000006115  
35 730001000006117  
36 730011000006119  
37 730021000006110  
38 730031000006113  
39 730041000006115  
40 730241000006113  
41 730251000006110  
42 730491000006117  
43 732441000006113  
44 7327551000006114  
45 732861000006110  
46 733371000006119  
47 733601000006114  
48 7347041000006119  
49 7347131000006113  
50 7347901000006115

For peer review only

1  
2 7347911000006117  
3 7351931000006117  
4 7358381000006114  
5 7358421000006116  
6 7358481000006117  
7 7359031000006117  
8 7359041000006110  
9 7359051000006112  
10 7361281000006119  
11 7364181000006113  
12 7364661000006113  
13 7366751000006111  
14 7368081000006118  
15 7369071000006110  
16 7369701000006118  
17 7373061000006114  
18 739801000006115  
19 74591000006110  
20 746191000000115  
21 7508781000006118  
22 753161000000117  
23 755631000006110  
24 755671000006113  
25 7559601000006119  
26 7577631000006119  
27 7577641000006112  
28 7577651000006114  
29 7577661000006111  
30 7577671000006116  
31 7577681000006118  
32 7694901000006113  
33 7819601000006111  
34 7828931000006112  
35 7828941000006119  
36 799181000006112  
37 8029401000006113  
38 8029421000006115  
39 8052161000006111  
40 8052181000006118  
41 8078541000006118  
42 81281000006117  
43 8232021000006114  
44 8232041000006119  
45 8232061000006115  
46 8235031000006119  
47 824221000006113  
48 825711000006111  
49 825771000006119  
50 825841000006115  
51 83391000006114

For peer review only

1  
2 83411000006114  
3 83431000006115  
4 83441000006113  
5 83451000006110  
6 841331000006115  
7  
8 84190018  
9 844951000006111  
10 853151000006113  
11 853821000006110  
12 855531000006114  
13 861611000006111  
14 867621000006111  
15 867631000006114  
16 867661000006117  
17 867671000006112  
18 867681000006110  
19 877611000006114  
20 878631000006116  
21 878841000006110  
22 879681000006114  
23 879691000006112  
24 879701000006112  
25 879711000006110  
26 879721000006119  
27 879731000006116  
28 879811000006118  
29 879821000006114  
30 879891000006111  
31 879911000006113  
32 879921000006117  
33 879931000006119  
34 879951000006114  
35 879961000006111  
36 879971000006116  
37 880021000006116  
38 880031000006118  
39 880041000006111  
40 880051000006113  
41 880061000006110  
42 880071000006115  
43 880081000006117  
44 880091000006119  
45 880111000006111  
46 880131000006117  
47 880141000006110  
48 880151000006112  
49 880161000006114  
50 880171000006119  
51 880181000006116  
52 880191000006118

For peer review only



1  
2 880201000006115  
3 880211000006117  
4 880221000006113  
5 880231000006111  
6 880241000006118  
7 880251000006116  
8 880261000006119  
9 880271000006114  
10 880281000006112  
11 880291000006110  
12 880301000006111  
13 880311000006114  
14 880321000006118  
15 880331000006115  
16 880341000006113  
17 880351000006110  
18 880361000006112  
19 880371000006117  
20 880381000006119  
21 880391000006116  
22 880411000006116  
23 880421000006112  
24 880431000006110  
25 880441000006117  
26 880461000006118  
27 880471000006113  
28 880481000006111  
29 880491000006114  
30 880501000006118  
31 880511000006115  
32 880521000006111  
33 880531000006114  
34 880541000006116  
35 880551000006119  
36 880561000006117  
37 880571000006112  
38 880581000006110  
39 880591000006113  
40 880601000006117  
41 880611000006119  
42 880621000006110  
43 880631000006113  
44 880641000006115  
45 880651000006118  
46 880661000006116  
47 880671000006111  
48 880681000006114  
49 880691000006112  
50 880701000006112  
51 880711000006110

For peer review only

1  
2 880721000006119  
3 880741000006114  
4 880751000006111  
5 880761000006113  
6 880771000006118  
7  
8 881181000006112  
9 881191000006110  
10 881201000006113  
11 881221000006115  
12  
13 881251000006112  
14 881261000006114  
15 881271000006119  
16 881281000006116  
17 881291000006118  
18  
19 881301000006117  
20 881311000006119  
21 888171000006117  
22 892311000006114  
23 893291000006118  
24  
25 906971000006110  
26 907001000006115  
27 907021000006113  
28 907041000006118  
29 907061000006119  
30 907091000006110  
31 907101000006116  
32 907111000006118  
33 907121000006114  
34 907261000006110  
35 907331000006114  
36 907341000006116  
37 907351000006119  
38 907361000006117  
39 907371000006112  
40 907381000006110  
41 907391000006113  
42 907401000006110  
43 907431000006119  
44 908781000006110  
45 910131000006114  
46 910191000006113  
47 928731000006117  
48 928751000006112  
49 928781000006116  
50 931991000006113  
51 932121000006116  
52 932481000006112  
53 933251000006113  
54 939971000006111  
55 940011000006113  
56  
57  
58  
59  
60

For peer review only

1  
2 940021000006117  
3 940031000006119  
4 940041000006112  
5 96271000006111  
6 97982010  
7  
8 980021000006113  
9 982801000006112  
10 988581000006116  
11 988741000006117  
12 988751000006115  
13 988761000006118  
14 988801000006110  
15 989501000006115  
16 990551000006111  
17 990561000006113  
18 990571000006118  
19 990581000006115  
20 991771000006115  
21  
22  
23  
24  
25  
26  
27  
28  
29  
30  
31  
32  
33  
34  
35  
36  
37  
38  
39  
40  
41  
42  
43  
44  
45  
46  
47  
48  
49  
50  
51  
52  
53  
54  
55  
56  
57  
58  
59  
60

For peer review only

1  
2 Term

3 cause of learning disabilities: brain tumour  
4 adverse reaction to drugs used in malignant disease and immunosuppression  
5 adverse reaction to sex hormones and antagonists in malignant disease  
6 adverse reaction to oestrogens in malignant diseases  
7 adverse reaction to progestogens in malignant disease  
8 mesothelioma  
9  
10 stewart-treves syndrome  
11 teratoma of descended testis  
12 teratoma of testis  
13 teratoma of undescended testis  
14 synovial osteochondromatosis of lesser mtp joint  
15 synovial osteochondromatosis of mcp joint  
16 synovial osteochondromatosis of pip joint of finger  
17 polyp of colon  
18 colonic polyp  
19 melanoma in situ of skin structure of scalp and/or neck  
20 cystosarcoma phyllodes  
21 erythroplasia  
22 carcinoma in situ of skin of head and neck  
23 osteoma  
24 secondary malignant neoplasm of other digestive organ  
25 secondary malignant neoplasm of other respiratory organs  
26 secondary and unspec malig neop anterior cervical ln  
27 secondary and unspec malig neop circumflex iliac ln  
28 secondary and unspec malig neop coeliac lymph nodes  
29 secondary and unspec malig neop common iliac lymph nodes  
30 secondary and unspec malig neop deep cervical ln  
31 secondary and unspec malig neop deep inguinal lymph nodes  
32 secondary and unspec malig neop deep parotid lymph nodes  
33 secondary and unspec malig neop diaphragmatic lymph nodes  
34 secondary and unspec malig neop inferior epigastric ln  
35 secondary and unspec malig neop inferior mesenteric ln  
36 secondary and unspec malig neop inferior tracheobronchial ln  
37 secondary and unspec malig neop infraclavicular lymph nodes  
38 secondary and unspec malig neop intercostal lymph nodes  
39 secondary and unspec malig neop internal iliac lymph nodes  
40 secondary and unspec malig neop internal mammary lymph nodes  
41 secondary and unspec malig neop obturator lymph nodes  
42 secondary and unspec malig neop of facial lymph nodes  
43 secondary and unspec malig neop pectoral lymph nodes  
44 secondary and unspec malig neop popliteal lymph nodes  
45 secondary and unspec malig neop pulmonary lymph nodes  
46 secondary and unspec malig neop sacral lymph nodes  
47 secondary and unspec malig neop submandibular lymph nodes  
48 secondary and unspec malig neop submental lymph nodes  
49 secondary and unspec malig neop superficial cervical ln  
50 secondary and unspec malig neop superficial inguinal ln  
51 secondary and unspec malig neop supratrochlear lymph nodes  
52 secondary and unspec malignant neoplasm mastoid lymph nodes  
53  
54  
55  
56  
57  
58  
59  
60

1  
2 rectal carcinoma  
3 overlapping lesion of other and unspecified parts of mouth  
4 acinar cell tumor  
5 [m]adenomatous and adenocarcinomatous polyps  
6 [m]adenomatous and adenocarcinomatous polyps of colon  
7 [m]adenomatous or adenocarcinomatous polyp nos  
8 [m]apocrine adenoma or adenocarcinoma nos  
9 blood vessel tumor  
10  
11 [m]ceruminous adenoma and adenocarcinoma  
12 [m]clear cell adenoma or adenocarcinoma nos  
13 [m]clear cell adenomas and adenocarcinomas  
14 [m]cystadenoma and carcinoma  
15 [m]cystadenoma or carcinoma nos  
16 giant cell tumor  
17 giant cell tumor of bone  
18 hemangioendothelioma  
19 [m]infiltrating ductular carcinoma  
20 mesonephric tumor  
21 mesothelioma (malignant, clinical disorder)  
22 [m]mixed cell adenoma or adenocarcinoma nos  
23 [m]mucinous adenoma and adenocarcinoma  
24 [m]mucinous adenoma or adenocarcinoma nos  
25 [m]myoma and myosarcoma  
26 [m]myoma or myosarcoma nos  
27 [m]neoplasms nos  
28 nerve sheath tumor  
29 odontogenic tumor  
30 [m]oxyphilic adenoma or adenocarcinoma nos  
31 [m]oxyphilic adenomas and adenocarcinomas  
32 [m]papillary adenoma or adenocarcinoma nos  
33 [m]papillary adenomas and adenocarcinomas  
34 [m]sebaceous adenoma and adenocarcinoma  
35 [m]sebaceous adenoma or adenocarcinoma nos  
36 serous surface papillary tumor of borderline malignancy  
37 specialized gonadal neoplasm  
38 sweat gland tumor  
39 [m]tubular adenoma or adenocarcinoma nos  
40 [m]tubular adenomas and adenocarcinomas  
41 [m]urothelial carcinoma  
42 [m]villous adenoma or adenocarcinoma nos  
43 [m]villous adenomas and adenocarcinomas  
44 [x]mal neoplasm/overlap les/periph nerv+autonomic nerv system  
45 [x]malignant neoplasm of breast  
46 [x]malignant neoplasm of bronchus or lung, unspecified  
47 malignant tumor of male genital organ  
48 malignant tumor of mediastinum  
49 [x]malignant neoplasm-pluriglandular involvement,unspecified  
50 [x]malignant neoplasm/bones+articular cartilage/limb,unspfd  
51 [x]malignant neoplasm/overlap lesion/bone+articulr cartilage  
52 [x]malignant neoplasm/overlapping lesion/male genital organs

1 liver cell carcinoma  
2 carcinoma in situ of lip, oral cavity and pharynx  
3 carcinoma of rectum  
4 melanoma in situ of scalp and neck  
5 malignant neoplasm of ventral tongue surface nos  
6 malignant tumor of vulva  
7 malignant neoplasm, overlap lesion of resp & intrathor organs  
8 malignant neoplasm of trunk nos  
9 malignant tumor of small intestine  
10 malignant neoplasm of stomach nos  
11 malignant neoplasm of supraclavicular fossa nos  
12 malignant neoplasm of prepylorus of stomach  
13 malignant neoplasm of posterior wall of stomach nec  
14 malignant neoplasm of lip unspecified, inner aspect  
15 malignant neoplasm of lip, unspecified, lipstick area  
16 malignant tumor of head and neck  
17 malignant neoplasm of inguinal region nos  
18 malignant neoplasm of jaw nos  
19 neoplasm of urinary system  
20 malignant neoplasm of flank nos  
21 malignant neoplasm of chest wall nos  
22 malignant neoplasm of back nos  
23 malignant neoplasm of bone and articular cartilage nos  
24 malignant tumor of lung  
25 malignant neoplasm of anterior wall of stomach nec  
26 malig neop of connective and soft tissue trunk unspecified  
27 hyperparathyroid bone disease  
28 primary malignant neoplasm of descended testis  
29 acinar cell tumor  
30 blood vessel tumor  
31 giant cell tumor of bone  
32 hemangioendothelioma  
33 mesonephric tumor  
34 specialized gonadal neoplasm  
35 sweat gland tumor  
36 human immunodeficiency virus with secondary cancers  
37 intestinal metaplasia of gastric mucosa  
38 surface epithelial-stromal tumour  
39 malignant neoplasm of eye  
40 malignant neoplasm of adrenal cortex  
41 malignant neoplasm of adrenal medulla  
42 malignant neoplasm of body of uterus  
43 malignant neoplasm of clitoris  
44 malignant neoplasm of female breast  
45 cervical cancer screening offered  
46 cervical cancer screening not offered  
47 secondary malignant neoplasm of retroperitoneum  
48 malignant neoplasm, overlapping lesion of oesophagus  
49 [m]hilar cell tumour  
50 [m]juxtglomerular tumour

1 [m]squamous cell carcinoma, keratinising type nos  
2 ca upper third oesophagus  
3 ca middle third oesophagus  
4 ca lower third oesophagus  
5 tumour nos  
6 [m]papillary cystic tumour  
7 [m]carotid body tumour  
8 [m]mucocarcinoid tumour, malignant  
9 [m]glomus jugulare tumour  
10 [m]mixed germ cell tumour  
11 [m]triton tumour, malignant  
12 malignant neoplasm of caecum  
13 oesophageal cancer  
14 malignant neoplasm of oesophagus  
15 [m]primitive neuroectodermal tumour  
16 [m]rathke's pouch tumour  
17 [m]carcinoid tumour, argentaffin, malignant  
18 [m]aortic body tumour  
19 [m]epithelioid haemangioendothelioma, malignant  
20 [m]sclerosing stromal tumour  
21 [m]klatskin's tumour  
22 [m]haemangioendothelioma  
23 [m]blue naevus, malignant  
24 [m]sex cord tumour with annular tubules  
25 [m]placental site trophoblastic tumour  
26 [m]juvenile granulosa cell tumour  
27 [m]adenocarcinoid tumour  
28 carcinoma in situ of lower 1/3 oesophagus  
29 carcinoma in situ of middle 1/3 oesophagus  
30 carcinoma in situ of upper 1/3 oesophagus  
31 malignant neoplasm, overlapping lesion of hypopharynx  
32 malignant neoplasm, overlapping lesion of eye and adnexa  
33 neuroendocrine tumor  
34 neuroendocrine tumour  
35 malignant neoplasm, overlapping lesion of nasopharynx  
36 malignant neoplasm, overlapping lesion of larynx  
37 malignant overlapping lesion of tongue  
38 malignant neoplasm, overlapping lesion of floor of mouth  
39 malignant neoplasm, overlapping lesion of stomach  
40 malignant neoplasm, overlapping lesion of small intestine  
41 malignant neoplasm, overlapping lesion of biliary tract  
42 malignant neoplasm, overlapping lesion of pancreas  
43 malignant neoplasm, overlapping lesion of penis  
44 [m]bronchiolo-alveolar adenocarcinoma  
45 [m]pseudomyxoma peritonei  
46 malignant mixed mesodermal tumor  
47 malignant mixed mesodermal tumour  
48 [m]neurofibromas  
49 [m]mesoblastic nephroma  
50 metastatic colorectal cancer

1 [m]serous cystadenoma, borderline malignancy  
2 [m]papillary cystadenoma, borderline malignancy  
3 [m]papillary serous cystadenoma, borderline malignancy  
4 malignant neuroleptic syndrome  
5 [m]hepatocellular carcinoma, fibrolamellar  
6 [m]subependymal giant cell astrocytoma  
7 [m]myxoid leiomyosarcoma  
8 [m]acral lentiginous melanoma, malignant  
9 [m]carcinoma in pleomorphic adenoma  
10 [m]queyrat's erythroplasia  
11 ca cardia - stomach  
12 ca pylorus - stomach  
13 ca fundus - stomach  
14 ca body - stomach  
15 ca larynx - supraglottis  
16 ca ribs/sternum/clavicle  
17 [m]invasive hydatidiform mole  
18 [m]chorioadenoma  
19 [m]chorioadenoma destruens  
20 ca ovary/other uterine adnexa  
21 [m]follicular carcinoma  
22 malignant pleural mesothelioma  
23 [m]teratoma, malignant, nos  
24 [m]small cell-large cell carcinoma  
25 [m]osteosarcoma nos  
26 [m]hepatocellular carcinoma nos  
27 [m]myxosarcoma  
28 [m]adenofibroma nos  
29 multiple endocrine neoplasia syndrome type 1  
30 [m]vipoma  
31 [m]nephroblastoma nos  
32 [m]adenosarcoma  
33 [v]prophylactic antibiotic  
34 [m]basal cell adenocarcinoma  
35 [m]infiltrating duct and lobular carcinoma  
36 [m]granulocytic sarcoma  
37 [m]haemangiopericytoma nos  
38 malignant neoplasm of cervix uteri  
39 malignant neoplasm of upper lip, vermilion border  
40 malignant neoplasm of lower lip, lipstick area  
41 malignant neoplasm of posterior third of tongue  
42 malignant neoplasm of major salivary glands  
43 malignant neoplasm of submandibular gland  
44 malignant neoplasm of roof of mouth  
45 malignant neoplasm of palatine tonsil  
46 malignant neoplasm of faucial tonsil  
47 malignant neoplasm of roof of nasopharynx  
48 ca hepatic flexure - colon  
49 ca transverse colon  
50 ca descending colon



1 ca sigmoid colon  
2 ca ascending colon  
3 ca splenic flexure - colon  
4 ca rectosigmoid junction  
5 malignant neoplasm of retroperitoneum  
6 malignant neoplasm of nasal cavities  
7 malignant neoplasm of ethmoid sinus  
8 ca larynx - subglottis  
9 malignant neoplasm of soft tissue of head  
10 malignant neoplasm of soft tissue of face  
11 malignant neoplasm of soft tissue of neck  
12 cancer of ovary  
13 malignant neoplasm of prepuce (foreskin)  
14 [m]linitis plastica  
15 [m]lipid-rich carcinoma  
16 [m]astrocytoma nos  
17 [m]intraepidermal epithelioma of jadassohn  
18 [m]malignant melanoma, regressing  
19 [m]craniopharyngioma  
20 [m]pulmonary blastoma  
21 [m]malignant melanoma in hutchinson's melanotic freckle  
22 [m]mesenchymomas  
23 [m]chorioepithelioma  
24 [m]choriocarcinoma  
25 [m]subependymoma  
26 [m]adenocarcinoma in multiple adenomatous polyps  
27 [m]adenocarcinoma in situ in villous adenoma  
28 [m]kaposi's sarcoma  
29 [m]merkel cell carcinoma  
30 [m]adenocarcinoma in situ in tubulovillous adenoma  
31 [m]desmoplastic melanoma, malignant  
32 [m]combined hepatocellular carcinoma and cholangiocarcinoma  
33 [m]pancreatoblastoma  
34 [m]fibrosarcoma nos  
35 [m]paget's disease and intraductal carcinoma of breast  
36 [m]sebaceous adenocarcinoma  
37 [m] t-gamma lymphoproliferative disease  
38 [m]osteoblastoma  
39 [m]neuroendocrine carcinoma  
40 [m]adenocarcinoma in tubulovillous adenoma  
41 [m]angiomyxoma  
42 [m]trichoepithelioma  
43 [m]squamous cell carcinoma in situ nos  
44 [m]small cell carcinoma, intermediate cell  
45 [m]adenocarcinoma in situ in adenomatous polyp  
46 [m]hutchinson's melanotic freckle  
47 [m]pigmented dermatofibrosarcoma protuberans  
48 falciparum malaria - malignant  
49 [m]synovioma nos  
50 [m]synovial sarcoma nos

1 [m]lipoblastomatosis  
2 [m]intraductal papillary adenocarcinoma with invasion  
3 [m]mucinous cystadenoma nos  
4 [m]dedifferentiated liposarcoma  
5 [m]carcinomatosis  
6 [m]neurinomatosi  
7 [m]gangliocytic paraganglioma  
8 [m]glycogen-rich carcinoma  
9 [m]apudoma  
10 [m]dermatofibroma protuberans  
11 polyneuropathy in malignant disease  
12 [m]melanoma in situ  
13 [m]pleomorphic xanthoastrocytoma  
14 [m]von recklinghausen's disease  
15 [m]neurofibromatosis nos  
16 [m]multiple neurofibromatosis  
17 [m]rhabdoid sarcoma  
18 [m]chondromatosis nos  
19 [m]phaeochromocytoma nos  
20 [m]cystic mesothelioma  
21 [m]giant cell sarcoma (except of bone)  
22 [m]juvenila melanoma  
23 [m]alveolar soft part sarcoma  
24 carcinoma in situ of skin of forehead skin  
25 malignant melanoma of external surface of cheek  
26 malignant melanoma of eyebrow  
27 malignant melanoma of external surface of nose  
28 secondary malignant neoplasm of peritoneum  
29 ca liver - primary  
30 [m]epithelial-myoepithelial carcinoma  
31 osteoma  
32 teratoma of descended testis  
33 [m]basal cell neoplasms  
34 [m]ependymoma nos  
35 [m]papillary neoplasms  
36 [m]seminomas  
37 malignant tumor of female genital organ  
38 cervical smear - severe dyskaryosis ? invasive carcinoma  
39 cervical smear - ? glandular neoplasia  
40 sternomastoid tumour  
41 secondary and unspec malig neop of superficial parotid In  
42 secondary and unspec malig neop superfic tracheobronchial In  
43 [m]subependymal astrocytoma nos  
44 [m]wilms' tumour  
45 carcinoma in situ of urinary tract proper  
46 primary malignant neoplasm of skin  
47 malignant tumour of posterior margin of nasal septum and choanae  
48 malignant neoplasm skin of other and unspecified parts face  
49 malignant tumour of upper labial mucosa  
50 primary malignant neoplasm of intrahepatic bile ducts

1 malignant neoplasm of long bones of leg  
2 [m]carcinoma, metastatic, nos  
3 malignant neoplasm of skin of trunk, excluding scrotum  
4 malignant neoplasm of ovary and other uterine adnexa  
5 secondary and unspecified malignant neoplasm of lymph nodes of head, face and neck  
6 malignant neoplasm of lip, oral cavity and pharynx nos  
7 malignant neoplasm of lesser curve of stomach unspecified  
8 malignant neoplasm of greater curve of stomach unspecified  
9 secondary and unspecified malignant neoplasm of intrathoracic lymph nodes  
10 secondary and unspecified malignant neoplasm of axilla and upper limb lymph nodes  
11 secondary and unspecified malignant neoplasm of inguinal and lower limb lymph nodes  
12 malignant neoplasm of skin nos  
13 secondary and unspecified malignant neoplasm of intra-abdominal lymph nodes  
14 secondary and unspecified malignant neoplasm of lymph nodes in multiple sites  
15 secondary and unspecified malignant neoplasm of lymph nodes nos  
16 malignant neoplasm of other and unspecified site nos  
17 malignant neoplasm of other and ill-defined sites  
18 secondary malignant neoplasm of other digestive organ  
19 malignant melanoma of skin nos  
20 secondary and unspecified malignant neoplasm of intrapelvic lymph nodes  
21 malignant neoplasm of female breast nos  
22 malignant neoplasm of larynx nos  
23 malignant neoplasm of anus unspecified  
24 malignant neoplasm of rectum, rectosigmoid junction and anus nos  
25 secondary malignant neoplasm of other specified site nos  
26 malignant neoplasm of unspecified site  
27 other malignant neoplasm nos  
28 unspecified nature neoplasm  
29 disseminated malignancy nos  
30 malignant neoplasm of liver and intrahepatic bile ducts nos  
31 neoplasms nos  
32 malignant neoplasm of bone and articular cartilage nos  
33 malignant neoplasm of body of uterus nos  
34 other malignant neoplasm of skin  
35 malignant neoplasm of uterine adnexa nos  
36 malignant neoplasm of kidney or urinary organs nos  
37 malignant neoplasm of penis, part unspecified  
38 malignant neoplasm of genitourinary organ nos  
39 squamous cell carcinoma of skin nos  
40 [m]dermatofibroma protuberans  
41 mesothelioma  
42 malignant tumor of ureter  
43 malignant tumor of thyroid gland  
44 malignant tumor of tonsil  
45 malignant tumor of stomach  
46 malignant tumor of rectum  
47 malignant tumor of head of pancreas  
48 malignant tumor of hepatic flexure  
49 neoplasm of urinary system  
50 malignant tumor of gallbladder

1 malignant tumor of descending colon  
2 malignant tumor of duodenum  
3 malignant tumor of base of tongue  
4 urticaria pigmentosa  
5 anaplasia of cervix  
6 malignant pleural effusion  
7 clark melanoma level 1  
8 excepted from cancer quality indicators: patient unsuitable  
9 excepted from cancer quality indicators: informed dissent  
10 bowen's disease  
11 human immunodeficiency virus infection  
12 neuroblastoma  
13 severe vaginal dysplasia, not elsewhere classified  
14 severe vulvar dysplasia, not elsewhere classified  
15 tumour marker monitoring  
16 endoscopic removal of bladder lesion  
17 paraneoplastic antibody level  
18 administration of cancer treatment  
19 gleason prostate grade 5-7 (medium)  
20 squamous cell carcinoma antigen level  
21 cancer treatment started  
22 cancer diagnosis discussed  
23 cancer care plan  
24 cancer confirmed  
25 cancer primary healthcare multidisciplinary team  
26 cancer diagnosis discussed with significant other  
27 cancer diagnosis discussed with patient  
28 cancer care plan discussed with patient  
29 cancer care plan discussed with significant other  
30 turbt - transurethral resection of bladder tumour  
31 ca extrahepatic bile ducts  
32 gleason prostate grade 2-4 (low)  
33 gleason prostate grade 8-10 (high)  
34 ca larynx - glottis  
35 ca pelvic bones/sacrum/coccyx  
36 secondary malig neop of large intestine or rectum nos  
37 secondary malig neop of respiratory and digestive systems  
38 secondary malig neop of respiratory or digestive system nos  
39 secondary malig neop of retroperitoneum and peritoneum  
40 secondary malig neop of retroperitoneum or peritoneum nos  
41 secondary malig neop of small intestine or duodenum nos  
42 secondary malignant neoplasm of large intestine and rectum  
43 secondary malignant neoplasm of liver  
44 secondary malignant neoplasm of other specified site nos  
45 secondary malignant neoplasm of other specified sites  
46 secondary malignant neoplasm of small intestine and duodenum  
47 secondary unspec malig neop lymph nodes head/face/neck nos  
48 carcinoma in situ of adrenal gland  
49 carcinoma in situ of ampulla of vater  
50 carcinoma in situ of anal canal

1 carcinoma in situ of appendix  
2 carcinoma in situ of ascending colon  
3 carcinoma in situ of bladder  
4 carcinoma in situ of body of stomach  
5 carcinoma in situ of body of uterus  
6 carcinoma in situ of cardia of stomach  
7 carcinoma in situ of cervix uteri  
8 carcinoma in situ of colon  
9 carcinoma in situ of common bile duct  
10 carcinoma in situ of cystic duct  
11 carcinoma in situ of descending colon  
12 carcinoma in situ of duodenum  
13 carcinoma in situ of endocervix  
14 carcinoma in situ of endometrium  
15 carcinoma in situ of epididymis  
16 carcinoma in situ of epiglottis  
17 carcinoma in situ of ethmoidal sinus  
18 carcinoma in situ of eustachian tube  
19 carcinoma in situ of exocervix  
20 carcinoma in situ of eye  
21 carcinoma in situ of fallopian tube  
22 carcinoma in situ of floor of mouth  
23 carcinoma in situ of frontal sinus  
24 carcinoma in situ of fundus of stomach  
25 carcinoma in situ of glottis  
26 carcinoma in situ of hepatic flexure of colon  
27 carcinoma in situ of hypopharynx  
28 carcinoma in situ of ileum  
29 carcinoma in situ of intrahepatic bile ducts  
30 carcinoma in situ of jejunum  
31 carcinoma in situ of larynx  
32 carcinoma in situ of lip  
33 carcinoma in situ of liver  
34 carcinoma in situ of main bronchus  
35 carcinoma in situ of mastoid air cells  
36 carcinoma in situ of maxillary sinus  
37 carcinoma in situ of meckel's diverticulum  
38 carcinoma in situ of nasal cavity  
39 carcinoma in situ of nasopharynx  
40 carcinoma in situ of oropharynx  
41 carcinoma in situ of ovary  
42 carcinoma in situ of palate  
43 carcinoma in situ of pancreas  
44 carcinoma in situ of parathyroid gland  
45 carcinoma in situ of penis  
46 carcinoma in situ of perianal skin  
47 carcinoma in situ of pharynx  
48 carcinoma in situ of pituitary gland  
49 carcinoma in situ of pleura  
50 carcinoma in situ of prostate

1 carcinoma in situ of pyloric antrum  
2 carcinoma in situ of rectosigmoid junction  
3 carcinoma in situ of rectum  
4 carcinoma in situ of scrotum  
5 carcinoma in situ of sigmoid colon  
6 carcinoma in situ of skin of axilla  
7 carcinoma in situ of skin of back  
8 carcinoma in situ of skin of breast  
9 carcinoma in situ of skin of buttock  
10 carcinoma in situ of skin of cheek  
11 carcinoma in situ of skin of eyebrow  
12 carcinoma in situ of skin of foot  
13 carcinoma in situ of skin of groin  
14 carcinoma in situ of skin of hand  
15 carcinoma in situ of skin of hip  
16 carcinoma in situ of skin of knee  
17 carcinoma in situ of skin of lip  
18 carcinoma in situ of skin of neck  
19 carcinoma in situ of skin of nose  
20 carcinoma in situ of skin of perineum  
21 carcinoma in situ of skin of shoulder  
22 carcinoma in situ of skin of thigh  
23 carcinoma in situ of skin  
24 carcinoma in situ of sphenoidal sinus  
25 carcinoma in situ of spleen  
26 carcinoma in situ of stomach  
27 carcinoma in situ of testis  
28 carcinoma in situ of thyroid gland  
29 carcinoma in situ of tongue  
30 carcinoma in situ of trachea  
31 carcinoma in situ of transverse colon  
32 carcinoma in situ of vagina  
33 carcinoma in situ of vulva  
34 malignant melanoma of perianal skin  
35 malignant melanoma of skin  
36 malignant neoplasm of acromion  
37 malignant neoplasm of adrenal gland  
38 malignant neoplasm of anal canal  
39 malignant neoplasm of anterior mediastinum  
40 malignant neoplasm of aortic body  
41 malignant neoplasm of areola of female breast  
42 malignant neoplasm of areola of male breast  
43 malignant neoplasm of broad ligament  
44 malignant neoplasm of carotid body  
45 malignant neoplasm of cerebellum  
46 malignant neoplasm of clavicle  
47 malignant neoplasm of coccygeal body  
48 malignant neoplasm of cuboid  
49 malignant neoplasm of cystic duct  
50 malignant neoplasm of diaphragm  
51  
52  
53  
54  
55  
56  
57  
58  
59  
60

1 malignant neoplasm of dorsal surface of tongue  
2 malignant neoplasm of endocervix  
3 malignant neoplasm of epicardium  
4 malignant neoplasm of ethmoid bone  
5 malignant neoplasm of exocervix  
6 malignant neoplasm of femur  
7 malignant neoplasm of fibula  
8 malignant neoplasm of frontal bone  
9 malignant neoplasm of glomus jugulare  
10 malignant neoplasm of great vessels  
11 malignant neoplasm of hilus of lung  
12 malignant neoplasm of ilium  
13 malignant neoplasm of intrahepatic bile ducts  
14 malignant neoplasm of ischium  
15 malignant neoplasm of lateral wall of oropharynx  
16 malignant neoplasm of main bronchus  
17 malignant neoplasm of male breast  
18 malignant neoplasm of mandible  
19 malignant neoplasm of maxilla  
20 malignant neoplasm of nasal bone  
21 malignant neoplasm of nipple of female breast  
22 malignant neoplasm of nipple of male breast  
23 malignant neoplasm of occipital bone  
24 malignant neoplasm of optic nerve  
25 malignant neoplasm of parametrium  
26 malignant neoplasm of parietal bone  
27 malignant neoplasm of parietal peritoneum  
28 malignant neoplasm of parietal pleura  
29 malignant neoplasm of patella  
30 malignant neoplasm of pelvic peritoneum  
31 malignant neoplasm of periadrenal tissue  
32 malignant neoplasm of perianal skin  
33 malignant neoplasm of pericardium  
34 malignant neoplasm of placenta  
35 malignant neoplasm of posterior mediastinum  
36 malignant neoplasm of presacral region  
37 malignant neoplasm of pubis  
38 malignant neoplasm of radius  
39 malignant neoplasm of rectum  
40 malignant neoplasm of rib  
41 malignant neoplasm of sacrococcygeal region  
42 malignant neoplasm of scapula  
43 malignant neoplasm of skin of ankle  
44 malignant neoplasm of skin of back  
45 malignant neoplasm of skin of breast  
46 malignant neoplasm of skin of buttock  
47 malignant neoplasm of skin of chin  
48 malignant neoplasm of skin of eyebrow  
49 malignant neoplasm of skin of finger  
50 malignant neoplasm of skin of foot

1 malignant neoplasm of skin of forehead  
2 malignant neoplasm of skin of groin  
3 malignant neoplasm of skin of hand  
4 malignant neoplasm of skin of hip  
5 malignant neoplasm of skin of knee  
6 malignant neoplasm of skin of lip  
7 malignant neoplasm of skin of neck  
8 malignant neoplasm of skin of perineum  
9 malignant neoplasm of skin of shoulder  
10 malignant neoplasm of skin of thigh  
11 malignant neoplasm of skin of toe  
12 malignant neoplasm of skin of umbilicus  
13 malignant neoplasm of sphenoid bone  
14 malignant neoplasm of sternum  
15 malignant neoplasm of talus  
16 malignant neoplasm of temporal bone  
17 malignant neoplasm of tibia  
18 malignant neoplasm of ulna  
19 malignant neoplasm of ventral surface of tongue  
20 malignant neoplasm of visceral pleura  
21 malignant neoplasm of vomer  
22 malignant neoplasm of zygomatic bone  
23 secondary malignant neoplasm of adrenal gland  
24 secondary malignant neoplasm of bladder  
25 secondary malignant neoplasm of brain  
26 secondary malignant neoplasm of colon  
27 secondary malignant neoplasm of duodenum  
28 secondary malignant neoplasm of ileum  
29 under care cancer primary healthcare multidisciplinary team  
30 secondary malignant neoplasm of jejunum  
31 secondary malignant neoplasm of kidney  
32 secondary malignant neoplasm of liver  
33 secondary malignant neoplasm of lung  
34 secondary malignant neoplasm of mediastinum  
35 secondary malignant neoplasm of ovary  
36 secondary malignant neoplasm of penis  
37 secondary malignant neoplasm of pleura  
38 secondary malignant neoplasm of prostate  
39 secondary malignant neoplasm of rectum  
40 secondary malignant neoplasm of skin of breast  
41 secondary malignant neoplasm of skin of face  
42 secondary malignant neoplasm of skin of neck  
43 secondary malignant neoplasm of skin of trunk  
44 secondary malignant neoplasm of skin  
45 secondary malignant neoplasm of spinal cord  
46 secondary malignant neoplasm of testis  
47 secondary malignant neoplasm of tongue  
48 secondary malignant neoplasm of ureter  
49 secondary malignant neoplasm of urethra  
50 secondary malignant neoplasm of uterus



1 secondary malignant neoplasm of vagina  
2 secondary malignant neoplasm of vulva  
3 secondary and unspec malig neop ant mediastinal lymph nodes  
4 secondary and unspec malig neop anterior cervical ln  
5 secondary and unspec malig neop axilla and upper limb ln  
6 secondary and unspec malig neop axilla and upper limb ln nos  
7 secondary and unspec malig neop axillary lymph nodes  
8 secondary and unspec malig neop bronchopulmonary lymph nodes  
9 secondary and unspec malig neop circumflex iliac ln  
10 secondary and unspec malig neop coeliac lymph nodes  
11 secondary and unspec malig neop common iliac lymph nodes  
12 secondary and unspec malig neop deep cervical ln  
13 secondary and unspec malig neop deep inguinal lymph nodes  
14 secondary and unspec malig neop deep parotid lymph nodes  
15 secondary and unspec malig neop diaphragmatic lymph nodes  
16 secondary and unspec malig neop external iliac lymph nodes  
17 secondary and unspec malig neop inferior epigastric ln  
18 secondary and unspec malig neop inferior mesenteric ln  
19 secondary and unspec malig neop inferior tracheobronchial ln  
20 secondary and unspec malig neop infraclavicular lymph nodes  
21 tele. reminder for cervical neoplasia screen  
22 secondary and unspec malig neop inguinal and lower limb ln  
23 verbal reminder for cervical neoplasia screen  
24 verbal reminder for cervical neoplasia screen  
25 secondary and unspec malig neop intercostal lymph nodes  
26 secondary and unspec malig neop internal iliac lymph nodes  
27 secondary and unspec malig neop internal mammary lymph nodes  
28 secondary and unspec malig neop intra-abdominal ln nos  
29 secondary and unspec malig neop intra-abdominal lymph nodes  
30 secondary and unspec malig neop intrapelvic ln nos  
31 secondary and unspec malig neop intrapelvic lymph nodes  
32 primary malignant neoplasm of liver  
33 secondary and unspec malig neop intrathoracic ln nos  
34 secondary and unspec malig neop intrathoracic lymph nodes  
35 secondary and unspec malig neop lymph nodes head/face/neck  
36 secondary and unspec malig neop lymph nodes multiple sites  
37 secondary and unspec malig neop lymph nodes nos  
38 secondary and unspec malig neop of facial lymph nodes  
39 secondary and unspec malig neop of inguinal and leg ln nos  
40 secondary and unspec malig neop of superficial parotid ln  
41 secondary and unspec malig neop paratracheal lymph nodes  
42 secondary and unspec malig neop pectoral lymph nodes  
43 secondary and unspec malig neop post mediastinal lymph nodes  
44 secondary and unspec malig neop pulmonary lymph nodes  
45 secondary and unspec malig neop sacral lymph nodes  
46 secondary and unspec malig neop submandibular lymph nodes  
47 secondary and unspec malig neop submental lymph nodes  
48 secondary and unspec malig neop superfic tracheobronchial ln  
49 secondary and unspec malig neop superficial cervical ln  
50 secondary and unspec malig neop superficial inguinal ln

1 secondary and unspec malig neop superficial mesenteric In  
2 secondary and unspec malig neop supratrochlear lymph nodes  
3 secondary and unspec malignant neoplasm mastoid lymph nodes  
4 secondary and unspec malignant neoplasm occipital lymph node  
5 exception reporting: cancer quality indicators  
6 did not attend bowel cancer screening  
7 bowel cancer screening declined  
8 bowel cancer screening - positive fobs  
9 bowel cancer screening - negative fobs  
10 multiple self-healing epithelioma of ferguson-smith  
11 advice given about prostate cancer screening  
12 ovarian neoplasm screening  
13 not eligible for bowel cancer screening programme  
14 cancer multidisciplinary team report  
15 malignant melanoma of the ciliary body  
16 malignant melanoma of choroid  
17 malignant melanoma of iris  
18 has cancer key worker  
19 breslow depth staging for melanoma  
20 immunodeficiency with thymoma  
21 hereditary nonpolyposis colon cancer  
22 overlapping malignant melanoma of skin  
23 melanoma in situ of lip  
24 melanoma in situ of eyelid, including canthus  
25 melanoma in situ of scalp  
26 melanoma in situ of trunk  
27 mesothelioma of pericardium  
28 kaposi's sarcoma of skin  
29 kaposi's sarcoma of palate  
30 kaposi's sarcoma of lymph nodes  
31 malignant neoplasm of cloacogenic zone  
32 mesothelioma of peritoneum  
33 malignant neoplasm of descended testis  
34 lobular carcinoma in situ of breast  
35 intraductal carcinoma in situ of breast  
36 ovarian neoplasm screening  
37 epithelioid trophoblastic tumour  
38 grade 1 (stage pta) papillary urothelial/transitional cell carcinoma  
39 grade 2 (stage pta) papillary urothelial/transitional cell carcinoma  
40 grade 3 (stage pta) papillary urothelial/transitional cell carcinoma  
41 glioma  
42 [shhapt] lymphogranuloma venereum  
43 [shhapt] lymphogranuloma venereum - rectal infection  
44 [shhapt] lymphogranuloma venereum - pharyngeal infection  
45 vaginal intraepithelial neoplasia grade 3  
46 [m]superficial basal cell carcinoma  
47 [m]basal cell carcinoma, nodular  
48 [m]basal cell carcinoma, micronodular  
49 renal malignant neoplasm  
50 [m]basal cell carcinoma, infiltrative

1 [m]pigmented basal cell carcinoma  
2 carcinoid tumour of lung  
3 thymoma  
4 renal tubulo-interstitial disorder/ neoplastic diseases  
5 primary malignant neoplasm of lung  
6 small cell lung cancer  
7 non-small cell lung cancer  
8 squamous cell carcinoma of lung  
9 adenocarcinoma of lung  
10 large cell carcinoma of lung  
11 tumour stage finding  
12 tumour stage t1a  
13 tumour stage t1b  
14 tumour stage t2a  
15 tumour stage t2b  
16 tumour stage t3a  
17 tumour stage t3b  
18 tumour stage t4  
19 referred to cancer service  
20 staff group: nursing - cancer related  
21 cancer supportive care worker  
22 cancer care review  
23 anal intraepithelial neoplasia grade ii  
24 anal intraepithelial neoplasia grade i  
25 [m]sarcomatoid mesothelioma  
26 malignant neoplasm of urinary bladder  
27 anal intraepithelial neoplasia grade iii  
28 local recurrence of malignant tumour of urinary bladder  
29 local recurrence of malignant tumour of breast  
30 prostatic intraepithelial neoplasia  
31 malignant neoplasm of skin  
32 hiv disease resulting in kaposi sarcoma  
33 secondary malignant neoplasm of liver intrahepatic bile duct  
34 sarcoma of dendritic cells  
35 primary cutaneous cd30-positive t-cell proliferations  
36 bowel cancer screening programme invitation letter sent  
37 bowel cancer screening programme telephone invite  
38 cancer follow up - enhanced services administration  
39 breast cancer follow up - enhanced services administration  
40 prostate cancer follow up - enhanced services administration  
41 discharge from cancer primary healthcare mdt  
42 wilms' tumour + nephrotic syndrome + pseudohermaphroditism  
43 wells dvt score - active cancer  
44 wells pe score - malignancy  
45 prov of written info about bowel cancer screening programme  
46 [m]non-small cell carcinoma  
47 [m]peripheral neuroectodermal tumour  
48 cancer and/or significant invasive tumors  
49 crv smr - hi grade dyskaryosis? invasive squamous carcinoma  
50 cervical smear - ?endocervical type glandular neoplasia

1 cervical smear - ?non-cervical type glandular neoplasia  
2 [m]neuroendocrine neoplasm  
3 rectal neoplasm screen  
4 stewart-treves syndrome  
5 delayed diagnosis of cancer  
6 glomus tumour  
7 [m]metaplastic carcinoma  
8 [m]metaplastic melanoma  
9 [m]porocarcinoma  
10 ajcc tumour staging  
11 warthin's tumour  
12 low-dose ct scan for lung cancer screening offered  
13 carcinoma in situ of caecum  
14 carcinoma in situ of oesophagus  
15 agreement to participate in national cancer registry not known  
16 agreement to participate in national cancer registry not applicable  
17 consent to participate in national cancer registry  
18 dissent to participate in national cancer registry  
19 hypereosinophilic syndrome  
20 [m]neuroendocrine neoplasm  
21 basal cell carcinoma  
22 [m]squamous cell neoplasms  
23 [m]nesidioblastoma  
24 [m]juxtacortical osteosarcoma  
25 [m]insulinoma nos  
26 [m]glucagonoma nos  
27 [m]gastrinoma nos  
28 [m]dermatofibrosarcoma nos  
29 [m]rhabdomyosarcoma nos  
30 [m]complex mixed and stromal neoplasms  
31 [m]osteochondromatosis nos  
32 [m] monoclonal gammopathy  
33 pathological fracture due to metastatic bone disease  
34 osteosarcoma  
35 establishing focus of care with specialist cancer team  
36 insulinoma-associated antigen-2 antibody level  
37 respiratory neoplasm screen  
38 breast neoplasm screen  
39 large bowel neoplasm screen  
40 pleural fluid: malignant cells  
41 bowel cancer screening programme telephone invitation  
42 bowel cancer screening programme invitation letter sent  
43 colon polyp  
44 endocrine tumour of pancreas  
45 queyrats's erythroplasia  
46 other pituitary/adrenal hormones  
47 pharyngeal lymphogranuloma venereum  
48 rectal lymphogranuloma venereum  
49 date cancer diagnosis received in primary care  
50 bowel cancer screening programme bowel scope screening test

1  
2 bowel scope (flexible sigmoidoscopy) screen: cancer detected  
3 persistent omphalomesenteric duct  
4 persistent vitelline duct  
5 cancer hormonal treatment drugs band 1  
6 urine prostate cancer antigen 3 targeted genetic test  
7  
8 malignant melanoma stage ia  
9 malignant melanoma stage ib  
10 malignant melanoma stage iia  
11 malignant melanoma stage iib  
12 malignant melanoma stage iic  
13 malignant melanoma stage iiia  
14 malignant melanoma stage iiib  
15 malignant melanoma stage iiic  
16 malignant melanoma stage iiv m1a  
17 malignant melanoma stage iiv m1b  
18 malignant melanoma stage iiv m1c  
19  
20 prostate cancer care review  
21  
22 active surveillance of prostate cancer  
23 overlapping malign lesion of retroperitoneum and peritoneum  
24 malignant neoplasm of interlobular biliary canals  
25 malignant neoplasm of turbinate  
26 malignant neoplasm of palatoglossal arch  
27  
28 paget's disease-humerus  
29 paget's disease-pelvis  
30 paget's disease-phalanx of finger/thumb  
31 paget's disease-skull  
32  
33 discharge from secondary care cancer service  
34 malignant peripheral nerve sheath tumour with rhabdomyoblastic differentiation  
35 triton tumor, malignant  
36 triton tumour, malignant  
37  
38 malignant schwannoma with rhabdomyoblastic differentiation  
39 mpnst with rhabdomyoblastic differentiation  
40 malignant peripheral nerve sheath tumor with rhabdomyoblastic differentiation  
41 hypercortisolism due to nonpituitary tumour  
42 mucin-producing adenocarcinoma  
43 mucin-producing carcinoma  
44 mucin-secreting adenocarcinoma  
45 mucin-secreting carcinoma  
46  
47 malignant melanoma in junctional naevus  
48 malignant melanoma in junctional nevus  
49 psammomatous schwannoma  
50 plexiform schwannoma  
51 degenerated schwannoma  
52 cellular schwannoma  
53 ancient schwannoma  
54  
55 mixed islet cell and exocrine adenocarcinoma  
56 mixed ductal-endocrine carcinoma  
57 mixed acinar-endocrine carcinoma  
58  
59 basal cell epithelioma  
60 pigmented basal cell carcinoma

1 rodent ulcer  
2 basiloma  
3 bcc - basal cell carcinoma  
4 chromophobe adenocarcinoma  
5 melanotic neuroectodermal tumor  
6 retinal anlage tumor  
7 melanoameloblastoma  
8 melanotic progonoma  
9 retinal anlage tumour  
10 subependymal giant cell astrocytoma  
11 reticulum cell sarcoma, diffuse [obs]  
12 reticulum cell sarcoma [obs]  
13 serous cystadenofibroma  
14 melanoma  
15 mm - malignant melanoma  
16 malignant melanoma, no icd-o subtype  
17 malignant melanoma, no international classification of diseases for oncology subtype  
18 nm - nodular melanoma  
19 cancer hospital treatment completed  
20 cancer emotional and psychosocial support and advice  
21 cancer screening follow up  
22 cancer short term health assessment  
23 cancer rehabilitation and readaption  
24 cancer pain and symptom management  
25 mesonephroma, malignant  
26 mesonephric adenocarcinoma  
27 wolffian duct carcinoma  
28 adrenal cortical tumor, malignant  
29 adrenal cortical adenocarcinoma  
30 adrenal cortical tumour, malignant  
31 papilocystic adenocarcinoma  
32 adenofibroma  
33 papillary adenofibroma  
34 adenofibroma, no icd-o subtype  
35 adenofibroma, no international classification of diseases for oncology subtype  
36 paget's disease, mammary  
37 paget's carcinoma of the nipple  
38 paget disease, mammary  
39 oestrogen receptor positive tumour  
40 oligodendroglioma, anaplastic  
41 cancer shared care medication card  
42 progesterone receptor positive tumour  
43 malignant sacral teratoma  
44 cancer home care pack given  
45 [m]gliomas  
46 [m]glioma nos  
47 invasive mole - placenta  
48 lipid-rich carcinoma  
49 pacinian tumour  
50 krukensberg tumor

1 subependymoma  
2 subependymal astrocytoma  
3 mixed subependymoma-ependymoma  
4 scirrhous adenocarcinoma  
5 scirrhous carcinoma  
6 carcinoma with productive fibrosis  
7 metastatic adenocarcinoma  
8 tubular carcinoma  
9 gastrointestinal stromal tumour  
10 adenocarcinoma in situ in villous adenoma  
11 interstitial cell tumor  
12 interstitial cell tumour  
13 leydig cell tumor, no icd-o subtype  
14 leydig cell tumor  
15 leydig cell tumour  
16 leydig cell tumour, no icd-o subtype  
17 merkel cell carcinoma  
18 merkel cell tumor  
19 primary cutaneous neuroendocrine carcinoma  
20 merkel cell tumour  
21 gp out of hours service notified of cancer care plan  
22 follicular carcinoma  
23 schneiderian carcinoma  
24 cylindrical cell carcinoma  
25 other neoplasm screen nos  
26 adenocarcinoma in tubulovillous adenoma  
27 tubulopapillary adenocarcinoma  
28 papillotubular adenocarcinoma  
29 squamous cell carcinoma in situ with questionable stromal invasion  
30 epidermoid carcinoma in situ with questionable stromal invasion  
31 small cell carcinoma, intermediate cell  
32 neoplasm, malignant, uncertain whether primary or metastatic  
33 unclassified tumor, malignant, uncertain whether primary or metastatic  
34 unclassified tumour, malignant, uncertain whether primary or metastatic  
35 malignant tumor - uncertain whether primary or metastatic  
36 ameloblastic fibrodentinoma  
37 klatskin's tumour  
38 klatskin's tumor  
39 klatskin's tumour morphology  
40 klatskin's tumor morphology  
41 klatskin tumor  
42 increased platelets  
43 metatypical carcinoma  
44 sputum: malignant cells  
45 ascitic fluid: malignant cells  
46 carcinomatosis  
47 resistance to antineoplastic drug  
48 lymphoepithelial carcinoma  
49 lymphoepithelioma  
50 schminke tumor

1 schminke tumour  
2 lymphoepithelioma-like carcinoma  
3 x-ray metastasis control  
4 malignant neoplasm of intrahepatic biliary passages  
5 mixed tumour, malignant  
6 mixed tumor, malignant  
7 mixed tumor, salivary gland type, malignant  
8 mixed tumour, salivary gland type, malignant  
9 malignant chondroid syringoma  
10 malignant mixed tumour  
11 malignant mixed salivary gland tumour  
12 malignant mixed salivary gland tumor  
13 malignant mixed tumor  
14 mixed tumor  
15 mixed tumor, salivary gland type  
16 mixed tumour, salivary gland type  
17 mixed tumour  
18 mixed salivary gland tumour  
19 mixed salivary gland tumor  
20 myxoid fibroma  
21 codman's tumour  
22 chondromatous giant cell tumour  
23 chondroblastoma morphology  
24 squamous odontogenic tumour  
25 spermatocytic seminoma  
26 spermatocytoma  
27 cervical neoplasia screening  
28 epithelial-myoepithelial carcinoma  
29 undifferentiated spindle cell sarcoma  
30 paraganglioma, malignant  
31 monoclonal gammopathy  
32 histiocytic sarcoma  
33 carcinoma in situ  
34 giant cell tumour of bone, malignant  
35 giant cell tumor of bone, malignant  
36 osteoclastoma, malignant  
37 giant cell sarcoma of bone  
38 malignant giant cell tumor of bone  
39 malignant osteoclastoma  
40 squamous cell carcinoma, spindle cell  
41 epidermoid carcinoma, spindle cell  
42 squamous cell carcinoma, sarcomatoid  
43 epidermoid carcinoma - spindle cell  
44 squamous cell carcinoma - spindle cell  
45 giant pigmented nevus  
46 intermediate and giant congenital nevus  
47 intermediate and giant congenital naevus  
48 congenital giant pigmented naevus  
49 congenital giant pigmented nevus  
50 mucinous adenofibroma



1 mucinous cystadenofibroma  
2 mixed liposarcoma  
3 mixed-type liposarcoma  
4 hilus cell tumour  
5 hilar cell tumour  
6 adenocarcinoma, cylindroid  
7 adenocystic carcinoma  
8 cylindroma (except cylindroma of skin, m-82000)  
9 mesoblastic nephroma  
10 malignant neoplasm of brain  
11 granular cell tumour  
12 granular cell myoblastoma  
13 round cell osteosarcoma  
14 androblastoma, malignant  
15 arrhenoblastoma, malignant  
16 malignant androblastoma  
17 malignant arrhenoblastoma  
18 retinoblastoma, undifferentiated  
19 retinoblastoma - undifferentiated  
20 papillary urothelial carcinoma  
21 squamous cell carcinoma, microinvasive  
22 clear cell sarcoma (except of kidney m-89643)  
23 clear cell sarcoma, of tendons and aponeuroses  
24 melanoma, malignant, of soft parts  
25 osteofibrosarcoma  
26 reticulohistiocytoma  
27 sweat gland tumour  
28 polar spongioblastoma  
29 spongioblastoma polare  
30 primitive polar spongioblastoma [obs]  
31 mesonephric tumour  
32 wolffian duct tumor  
33 wolffian duct tumour  
34 granular cell tumour, malignant  
35 granular cell tumor, malignant  
36 granular cell myoblastoma, malignant  
37 malignant granular cell tumour  
38 malignant granular cell tumor  
39 malignant granular cell myoblastoma  
40 clark melanoma level 5  
41 mast cell sarcoma  
42 malignant mast cell tumor  
43 malignant mastocytoma  
44 malignant mast cell tumour  
45 glomoid sarcoma  
46 sarcoma botryoides  
47 botryoid sarcoma  
48 embryonal rhabdomyosarcoma, pleomorphic  
49 m6b  
50 aml m6

1  
2 endoscopic destruction of bladder tumour by laser  
3 meningeal sarcomatosis  
4 secondary malignant neoplasm of paratracheal lymph nodes  
5 tumor, metastatic  
6 tumor embolus  
7 neoplasm, secondary  
8 tumor, secondary  
9 tumour, metastatic  
10 tumour embolus  
11 tumour, secondary  
12 chondrosarcoma, no icd-o subtype  
13 chondrosarcoma  
14 fibrochondrosarcoma  
15 chondrosarcoma morphology  
16 chondrosarcoma, no international classification of diseases for oncology subtype  
17 adenoacanthoma  
18 neuroleptic malignant syndrome  
19 nms - neuroleptic malignant syndrome  
20 excision of melanoma  
21 hepatocellular carcinoma, fibrolamellar  
22 primary serous papillary carcinoma of peritoneum  
23 neoplasm screening  
24 thymoma, malignant  
25 reticulohistiocytic granuloma  
26 giant cell histiocytoma  
27 reticulohistiocytoma cutis  
28 myxoid leiomyosarcoma  
29 g cell tumor  
30 gastrin cell tumor  
31 g cell tumour  
32 gastrin cell tumour  
33 acral lentiginous melanoma, malignant  
34 carcinoma ex pleomorphic adenoma  
35 carcinoma in pleomorphic adenoma  
36 squamous cell carcinoma, keratinising  
37 squamous cell carcinoma, keratinizing  
38 squamous cell carcinoma, large cell, keratinizing  
39 epidermoid carcinoma, keratinizing  
40 epidermoid carcinoma, keratinising  
41 squamous cell carcinoma, large cell, keratinising  
42 keratinising squamous cell carcinoma - large cell  
43 keratinising epidermoid carcinoma  
44 keratinizing squamous cell carcinoma - large cell  
45 keratinizing epidermoid carcinoma  
46 endometrioid adenofibroma, malignant  
47 endometrioid cystadenofibroma, malignant  
48 malignant endometrioid cystadenofibroma  
49 malignant endometrioid adenofibroma  
50 extirpation of unspecified organ  
51 debulking of tumour of unspecified organ  
52  
53  
54  
55  
56  
57  
58  
59  
60

1 queyrat's erythroplasia  
2 queyrat erythroplasia  
3 adrenal cortical tumour  
4 malignant melanoma in precancerous melanosis  
5 malignant melanoma in melanosis  
6 synovial sarcoma, biphasic  
7 synovial sarcoma - biphasic  
8 intraductal carcinoma and lobular carcinoma in situ  
9 invasive hydatidiform mole  
10 malignant hydatidiform mole  
11 chorioadenoma destruens  
12 chorioadenoma  
13 invasive mole  
14 struma ovarii, malignant  
15 malignant struma ovarii  
16 granulosa cell tumour, malignant  
17 granulosa cell tumor, malignant  
18 granulosa cell carcinoma  
19 granulosa cell tumor, sarcomatoid  
20 granulosa cell tumour, sarcomatoid  
21 malignant granulosa cell tumor  
22 leiomyoblastoma  
23 fascial fibrosarcoma  
24 immunocytoma  
25 teratoma, malignant  
26 embryonal teratoma  
27 teratoblastoma, malignant  
28 immature teratoma, malignant  
29 malignant teratoblastoma  
30 teratoma, malignant, no icd-o subtype  
31 teratoma, malignant, no international classification of diseases for oncology subtype  
32 gastrinoma, malignant  
33 g cell tumor, malignant  
34 gastrin cell tumor, malignant  
35 g cell tumour, malignant  
36 gastrin cell tumour, malignant  
37 malignant g cell tumour  
38 malignant g cell tumor  
39 retinoblastoma - morphology  
40 squamous intraepithelial neoplasia, high grade  
41 cervical intraepithelial neoplasia, grade iii  
42 vulvar intraepithelial neoplasia, grade iii  
43 vaginal intraepithelial neoplasia, grade iii  
44 vin iii  
45 vain iii  
46 cin iii  
47 cin iii with severe dysplasia  
48 anal intraepithelial neoplasia, grade iii  
49 ain iii  
50 squamous intraepithelial neoplasia, grade iii

1  
2 ameloblastic odontosarcoma  
3 ameloblastic fibroodontosarcoma  
4 ameloblastic fibro-odontosarcoma  
5 ameloblastic dentinosarcoma  
6 adamantinoma (except of tibia and long bones, m-92613)  
7 adamantinoma  
8 drug prophylaxis  
9 myosarcoma  
10 warthin's tumour  
11 endometrioid cystadenofibroma  
12 insulinoma, malignant  
13 beta cell tumor, malignant  
14 beta cell tumour, malignant  
15 malignant beta cell tumour  
16 malignant beta cell tumor  
17 combined small cell carcinoma  
18 small cell-large cell carcinoma  
19 mixed small cell carcinoma  
20 combined small cell-squamous cell carcinoma  
21 combined small cell-adenocarcinoma  
22 ependymoblastoma  
23 osteosarcoma  
24 osteochondrosarcoma  
25 osteoblastic sarcoma  
26 osteoblastic osteosarcoma  
27 osteosarcoma, no icd-o subtype  
28 osteosarcoma, no international classification of diseases for oncology subtype  
29 osteosarcoma - morphology  
30 osler's disease  
31 malignant teratoma, intermediate  
32 malignant teratoma - intermediate  
33 microglioma [obs]  
34 adenocarcinoma with apocrine metaplasia  
35 carcinoma with apocrine metaplasia  
36 pseudosarcomatous carcinoma  
37 sarcomatoid carcinoma  
38 human immunodeficiency virus with secondary cancers  
39 human immunodeficiency virus with other clinical findings  
40 acquired human immunodeficiency virus infection syndrome nos  
41 hiv disease resulting in multiple malignant neoplasms  
42 cementoblastoma  
43 arthropod-borne disease nos  
44 5q minus syndrome  
45 lymphogranuloma venereum  
46 mixed acidophil-basophil carcinoma  
47 poisoning by antineoplastic and/or immunosuppressive drug  
48 poisoning caused by antineoplastic and/or immunosuppressive drug  
49 [x]hiv disease resulting in other malignant neoplasms  
50 [x]hiv disease resulting in unspecified malignant neoplasm  
51 malignant neoplasm of upper lip, lipstick area

1 malignant neoplasm of upper lip, vermilion border nos  
2 malignant neoplasm of lower lip, external  
3 malignant neoplasm of lower lip, vermilion border nos  
4 malignant neoplasm of upper lip, oral aspect  
5 malignant neoplasm of upper lip, inner aspect  
6 malignant neoplasm of upper lip, mucosa  
7 malignant neoplasm of upper lip, frenulum  
8 malignant neoplasm of upper lip, inner aspect nos  
9 malignant neoplasm of lower lip, buccal aspect  
10 malignant neoplasm of lower lip, frenulum  
11 malignant neoplasm of lower lip, inner aspect nos  
12 malignant neoplasm of lip unspecified, inner aspect  
13 malignant neoplasm of lip unspecified, frenulum  
14 malignant neoplasm of lip unspecified, mucosa  
15 malignant neoplasm of lip, oral aspect  
16 malignant neoplasm of lip, inner aspect nos  
17 malignant neoplasm of overlapping lesion of lip  
18 malignant neoplasm of other sites of lip  
19 malignant neoplasm of vermilion border of lip unspecified  
20 malignant neoplasm of lip, unspecified, external  
21 malignant neoplasm of lip, unspecified, lipstick area  
22 malignant neoplasm of lip, vermilion border nos  
23 malignant neoplasm of base of tongue dorsal surface  
24 malignant neoplasm of fixed part of tongue nos  
25 malignant neoplasm of anterior 2/3 of tongue dorsal surface  
26 malignant neoplasm of midline of tongue  
27 malignant neoplasm of dorsum of tongue nos  
28 malignant neoplasm of tongue, tip and lateral border  
29 malignant neoplasm of anterior 2/3 of tongue ventral surface  
30 malignant neoplasm of frenulum linguae  
31 malignant neoplasm of ventral tongue surface nos  
32 malignant neoplasm of anterior 2/3 of tongue unspecified  
33 malignant neoplasm of tongue, junctional zone  
34 malignant neoplasm of other sites of tongue  
35 malignant neoplasm of tongue nos  
36 malignant neoplasm of other major salivary glands  
37 malignant neoplasm of major salivary gland nos  
38 malignant neoplasm of other sites of gum  
39 malignant neoplasm of gum nos  
40 malignant neoplasm of anterior portion of floor of mouth  
41 malignant neoplasm of lateral portion of floor of mouth  
42 malignant neoplasm of other sites of floor of mouth  
43 malignant neoplasm of floor of mouth nos  
44 malignant neoplasm of other and unspecified parts of mouth  
45 malignant neoplasm of vestibule of mouth  
46 malignant neoplasm of upper buccal sulcus  
47 malignant neoplasm of lower buccal sulcus  
48 malignant neoplasm of upper labial sulcus  
49 malignant neoplasm of lower labial sulcus  
50 malignant neoplasm of vestibule of mouth nos

1 malignant neoplasm of palate unspecified  
2 malignant neoplasm of junction of hard and soft palate  
3 malignant neoplasm of palate nos  
4 overlapping lesion of other and unspecified parts of mouth  
5 malignant neoplasm of other specified mouth parts  
6 malignant neoplasm of mouth nos  
7 malignant neoplasm tonsil nos  
8 malignant neoplasm of faucial pillar  
9 malignant neoplasm of tonsillar pillar  
10 malignant neoplasm of tonsillar fossa nos  
11 malignant neoplasm of anterior epiglottis  
12 malignant neoplasm of epiglottis, free border  
13 malignant neoplasm of glossoepiglottic fold  
14 malignant neoplasm of anterior epiglottis nos  
15 malignant neoplasm of junctional region of epiglottis  
16 malignant neoplasm of posterior wall of oropharynx  
17 malignant neoplasm of oropharynx, other specified sites  
18 malignant neoplasm of other specified site of oropharynx nos  
19 malignant neoplasm of oropharynx nos  
20 malignant neoplasm of nasopharynx  
21 malignant neoplasm of posterior wall of nasopharynx  
22 malignant neoplasm of pharyngeal tonsil  
23 malignant neoplasm of adenoid  
24 malignant neoplasm of posterior wall of nasopharynx nos  
25 malignant neoplasm of pharyngeal recess  
26 malignant neoplasm of opening of auditory tube  
27 malignant neoplasm of lateral wall of nasopharynx nos  
28 malignant neoplasm of anterior wall of nasopharynx  
29 malignant neoplasm of floor of nasopharynx  
30 malignant neoplasm of nasopharyngeal soft palate surface  
31 malignant neoplasm of anterior wall of nasopharynx nos  
32 malignant neoplasm of other specified site of nasopharynx  
33 malignant neoplasm of nasopharynx nos  
34 malignant neoplasm of posterior pharynx  
35 malignant neoplasm of other specified hypopharyngeal site  
36 malignant neoplasm of hypopharynx nos  
37 malignant neoplasm of pharynx unspecified  
38 malignant neoplasm of waldeyer's ring  
39 malignant neoplasm of lip, oral cavity and pharynx nos  
40 malignant neoplasm of cervical oesophagus  
41 malignant neoplasm of thoracic oesophagus  
42 malignant neoplasm of abdominal oesophagus  
43 malignant neoplasm of upper third of oesophagus  
44 malignant neoplasm of middle third of oesophagus  
45 malignant neoplasm of lower third of oesophagus  
46 malignant neoplasm of other specified part of oesophagus  
47 malignant neoplasm of cardia of stomach  
48 malignant neoplasm of cardiac orifice of stomach  
49 malignant neoplasm of gastro-oesophageal junction  
50 malignant neoplasm of cardio-oesophageal junction of stomach  
51  
52  
53  
54  
55  
56  
57  
58  
59  
60

1 malignant neoplasm of cardia of stomach nos  
2 malignant neoplasm of pylorus of stomach  
3 malignant neoplasm of pyloric canal of stomach  
4 malignant neoplasm of pylorus of stomach nos  
5 malignant neoplasm of pyloric antrum of stomach  
6 malignant neoplasm of fundus of stomach  
7 malignant neoplasm of body of stomach  
8 malignant neoplasm of lesser curve of stomach unspecified  
9 malignant neoplasm of greater curve of stomach unspecified  
10 malignant neoplasm of other specified site of stomach  
11 malignant neoplasm of anterior wall of stomach nec  
12 malignant neoplasm of posterior wall of stomach nec  
13 malignant neoplasm of other specified site of stomach nos  
14 malignant neoplasm of stomach nos  
15 malignant neoplasm of meckel's diverticulum  
16 malignant neoplasm of small intestine nos  
17 malignant neoplasm, overlapping lesion of colon  
18 malignant neoplasm of other specified sites of colon  
19 malignant neoplasm of rectum, rectosigmoid junction and anus  
20 malignant neoplasm of anus unspecified  
21 malignant neoplasm of liver and intrahepatic bile ducts  
22 primary carcinoma of liver  
23 primary malignant neoplasm of liver nos  
24 malignant neoplasm of interlobular bile ducts  
25 malignant neoplasm of intrahepatic canaliculi  
26 malignant neoplasm of intrahepatic gall duct  
27 malignant neoplasm of intrahepatic bile ducts nos  
28 malignant neoplasm of liver unspecified  
29 malignant neoplasm of liver and intrahepatic bile ducts nos  
30 malignant neoplasm of hepatic duct  
31 malignant neoplasm of sphincter of oddi  
32 malignant neoplasm of extrahepatic bile ducts nos  
33 malignant neoplasm of body of pancreas  
34 malignant neoplasm of tail of pancreas  
35 malignant neoplasm of pancreatic duct  
36 malignant neoplasm of other specified sites of pancreas  
37 malignant neoplasm of ectopic pancreatic tissue  
38 malignant neoplasm of specified site of pancreas nos  
39 malignant neoplasm of pancreas nos  
40 malignant neoplasm of retroperitoneum and peritoneum  
41 malignant neoplasm of perinephric tissue  
42 malignant neoplasm of retrocaecal tissue  
43 malignant neoplasm of retroperitoneum nos  
44 malignant neoplasm of specified parts of peritoneum  
45 malignant neoplasm of mesocolon  
46 malignant neoplasm of mesocaecum  
47 malignant neoplasm of mesorectum  
48 malignant neoplasm of the pouch of douglas  
49 malignant neoplasm of specified parts of peritoneum nos  
50 malignant neoplasm of retroperitoneum and peritoneum nos  
51  
52  
53  
54  
55  
56  
57  
58  
59  
60

1 malignant neoplasm of intestinal tract, part unspecified  
2 malignant neoplasm of spleen nec  
3 angiosarcoma of spleen  
4 fibrosarcoma of spleen  
5 malignant neoplasm of spleen nos  
6 malignant neoplasm, overlapping lesion of digestive system  
7 malignant neoplasm of digestive tract and peritoneum nos  
8 malignant neoplasm of cartilage of nose  
9 malignant neoplasm of nasal conchae  
10 malignant neoplasm of vestibule of nose  
11 malignant neoplasm of nasal cavities nos  
12 malignant neoplasm of auditory (eustachian) tube  
13 malignant neoplasm of tympanic cavity  
14 malignant neoplasm of tympanic antrum  
15 malignant neoplasm, overlapping lesion of accessory sinuses  
16 malignant neoplasm of accessory sinus nos  
17 malignant neoplasm of glottis  
18 malignant neoplasm of supraglottis  
19 malignant neoplasm of arytenoid cartilage  
20 malignant neoplasm of cricoid cartilage  
21 malignant neoplasm of cuneiform cartilage  
22 malignant neoplasm of thyroid cartilage  
23 malignant neoplasm of laryngeal cartilage nos  
24 malignant neoplasm of larynx, other specified site  
25 malignant neoplasm of larynx nos  
26 malignant neoplasm of trachea, bronchus and lung  
27 malignant neoplasm of cartilage of trachea  
28 malignant neoplasm of mucosa of trachea  
29 malignant neoplasm of trachea nos  
30 malignant neoplasm of carina of bronchus  
31 malignant neoplasm of main bronchus nos  
32 malignant neoplasm of upper lobe bronchus  
33 malignant neoplasm of upper lobe of lung  
34 malignant neoplasm of upper lobe, bronchus or lung nos  
35 malignant neoplasm of middle lobe, bronchus or lung  
36 malignant neoplasm of middle lobe bronchus  
37 malignant neoplasm of middle lobe of lung  
38 malignant neoplasm of middle lobe, bronchus or lung nos  
39 malignant neoplasm of lower lobe, bronchus or lung  
40 malignant neoplasm of lower lobe bronchus  
41 malignant neoplasm of lower lobe of lung  
42 malignant neoplasm of lower lobe, bronchus or lung nos  
43 malignant neoplasm of other sites of bronchus or lung  
44 malignant neoplasm of other specified pleura  
45 malignant neoplasm of pleura nos  
46 malignant neoplasm of thymus, heart and mediastinum  
47 malignant neoplasm of heart nos  
48 malignant neoplasm of heart, thymus and mediastinum nos  
49 malignant neoplasm of other site of respiratory tract  
50 malignant neoplasm of respiratory tract nos



1 malignant neoplasm of bones of skull and face  
2 malignant neoplasm of malar bone  
3 malignant neoplasm of orbital bone  
4 malignant neoplasm of bones of skull and face nos  
5 malignant neoplasm of cervical vertebra  
6 malignant neoplasm of thoracic vertebra  
7 malignant neoplasm of lumbar vertebra  
8 malignant neoplasm of vertebral column nos  
9 malignant neoplasm of ribs, sternum and clavicle  
10 malignant neoplasm of costal cartilage  
11 malignant neoplasm of xiphoid process  
12 malignant neoplasm of rib, sternum and clavicle nos  
13 malignant neoplasm of scapula and long bones of upper arm  
14 malignant neoplasm of humerus  
15 malignant neoplasm of carpal bone - scaphoid  
16 malignant neoplasm of carpal bone - lunate  
17 malignant neoplasm of carpal bone - triquetrum  
18 malignant neoplasm of carpal bone - pisiform  
19 malignant neoplasm of carpal bone - trapezium  
20 malignant neoplasm of carpal bone - trapezoid  
21 malignant neoplasm of carpal bone - capitate  
22 malignant neoplasm of carpal bone - hamate  
23 malignant neoplasm of first metacarpal bone  
24 malignant neoplasm of second metacarpal bone  
25 malignant neoplasm of third metacarpal bone  
26 malignant neoplasm of fourth metacarpal bone  
27 malignant neoplasm of fifth metacarpal bone  
28 malignant neoplasm of phalanges of hand  
29 malignant neoplasm of hand bones nos  
30 malignant neoplasm of pelvic bones, sacrum and coccyx  
31 malignant neoplasm of sacral vertebra  
32 malignant neoplasm of coccygeal vertebra  
33 malignant neoplasm of pelvis, sacrum or coccyx nos  
34 malignant neoplasm of long bones of leg  
35 malignant neoplasm of long bones of leg nos  
36 malignant neoplasm of calcaneum  
37 malignant neoplasm of medial cuneiform  
38 malignant neoplasm of intermediate cuneiform  
39 malignant neoplasm of lateral cuneiform  
40 malignant neoplasm of navicular  
41 malignant neoplasm of first metatarsal bone  
42 malignant neoplasm of second metatarsal bone  
43 malignant neoplasm of third metatarsal bone  
44 malignant neoplasm of fourth metatarsal bone  
45 malignant neoplasm of fifth metatarsal bone  
46 malignant neoplasm of phalanges of foot  
47 malignant neoplasm of short bones of leg nos  
48 malignant neoplasm of bone and articular cartilage nos  
49 malignant neoplasm of connective and other soft tissue  
50 malignant neoplasm of cartilage of ear

1 malignant neoplasm of tarsus of eyelid  
2 malignant neoplasm soft tissues of cervical spine  
3 malignant neoplasm of connective and soft tissue of shoulder  
4 malignant neoplasm of connective and soft tissue, upper arm  
5 malignant neoplasm of connective and soft tissue of fore-arm  
6 malignant neoplasm of connective and soft tissue of hand  
7 malignant neoplasm of connective and soft tissue of finger  
8 malignant neoplasm of connective and soft tissue of thumb  
9 malignant neoplasm of connective and soft tissue of hip  
10 malignant neoplasm of connective and soft tissue of foot  
11 malignant neoplasm of connective and soft tissue of toe  
12 malignant neoplasm of connective and soft tissue of thorax  
13 malignant neoplasm of connective and soft tissue of axilla  
14 malignant neoplasm of connective and soft tissue of abdomen  
15 malignant neoplasm of connective and soft tissue of pelvis  
16 malignant neoplasm of connective and soft tissue of buttock  
17 malignant neoplasm of connective and soft tissue of perineum  
18 malignant neoplasm of connective and soft tissue, site nos  
19 kaposi's sarcoma of soft tissue  
20 malignant melanoma of lip  
21 malignant melanoma of ear and external auricular canal  
22 malignant melanoma of auricle (ear)  
23 malignant melanoma of external auditory meatus  
24 malignant melanoma of ear and external auricular canal nos  
25 malignant melanoma of other and unspecified parts of face  
26 malignant melanoma of chin  
27 malignant melanoma of forehead  
28 malignant melanoma of temple  
29 malignant melanoma of face nos  
30 malignant melanoma of scalp and neck  
31 malignant melanoma of scalp  
32 malignant melanoma of neck  
33 malignant melanoma of scalp and neck nos  
34 malignant melanoma of trunk (excluding scrotum)  
35 malignant melanoma of axilla  
36 malignant melanoma of breast  
37 malignant melanoma of buttock  
38 malignant melanoma of groin  
39 malignant melanoma of perineum  
40 malignant melanoma of umbilicus  
41 malignant melanoma of trunk, excluding scrotum, nos  
42 malignant melanoma of shoulder  
43 malignant melanoma of upper arm  
44 malignant melanoma of fore-arm  
45 malignant melanoma of hand  
46 malignant melanoma of finger  
47 malignant melanoma of thumb  
48 malignant melanoma of upper limb or shoulder nos  
49 malignant melanoma of lower limb and hip  
50 malignant melanoma of hip

1 malignant melanoma of thigh  
2 malignant melanoma of knee  
3 malignant melanoma of popliteal fossa area  
4 malignant melanoma of lower leg  
5 malignant melanoma of ankle  
6 malignant melanoma of heel  
7 malignant melanoma of foot  
8 malignant melanoma of toe  
9 malignant melanoma of great toe  
10 malignant melanoma of lower limb or hip nos  
11 atypical adenoma  
12 malignant melanoma of other specified skin site  
13 bronchial adenoma  
14 malignant melanoma of skin nos  
15 malignant neoplasm of sebaceous gland  
16 malignant neoplasm of skin of auricle (ear)  
17 malignant neoplasm of skin of external auditory meatus  
18 malignant neoplasm of skin of cheek, external  
19 malignant neoplasm of skin of nose (external)  
20 malignant neoplasm of skin of temple  
21 malignant neoplasm of scalp and skin of neck  
22 malignant neoplasm of scalp  
23 malignant neoplasm of scalp or skin of neck nos  
24 malignant neoplasm of skin of trunk, excluding scrotum  
25 malignant neoplasm of skin of axillary fold  
26 malignant neoplasm of skin of chest, excluding breast  
27 malignant neoplasm of skin of abdominal wall  
28 carcinoma, diffuse type  
29 adenocarcinoma, diffuse type  
30 adenocarcinoma - diffuse type  
31 carcinoma - diffuse type  
32 malignant neoplasm of skin of trunk, excluding scrotum, nos  
33 malignant neoplasm of skin of upper limb and shoulder  
34 malignant neoplasm of skin of upper arm  
35 malignant neoplasm of skin of fore-arm  
36 malignant neoplasm of skin of thumb  
37 malignant neoplasm of skin of upper limb or shoulder nos  
38 malignant neoplasm of skin of lower limb and hip  
39 malignant neoplasm of skin of popliteal fossa area  
40 malignant neoplasm of skin of lower leg  
41 malignant neoplasm of skin of heel  
42 malignant neoplasm of skin of great toe  
43 malignant neoplasm of skin of lower limb or hip nos  
44 malignant neoplasm of other specified skin sites  
45 malignant neoplasm of skin nos  
46 malignant neoplasm of nipple and areola of female breast  
47 malignant neoplasm of nipple or areola of female breast nos  
48 malignant neoplasm of central part of female breast  
49 malignant neoplasm of upper-inner quadrant of female breast  
50 malignant neoplasm of lower-inner quadrant of female breast

1 malignant neoplasm of upper-outer quadrant of female breast  
2 malignant neoplasm of lower-outer quadrant of female breast  
3 malignant neoplasm of axillary tail of female breast  
4 malignant neoplasm, overlapping lesion of breast  
5 malignant neoplasm of other site of female breast  
6 malignant neoplasm of ectopic site of female breast  
7 malignant neoplasm of other site of female breast nos  
8 malignant neoplasm of female breast nos  
9 malignant neoplasm of nipple and areola of male breast  
10 malignant neoplasm of nipple or areola of male breast nos  
11 malignant neoplasm of other site of male breast  
12 malignant neoplasm of ectopic site of male breast  
13 malignant neoplasm of male breast nos  
14 malignant neoplasm of uterus, part unspecified  
15 malignant neoplasm of endocervical canal  
16 malignant neoplasm of endocervical gland  
17 malignant neoplasm of endocervix nos  
18 malignant neoplasm, overlapping lesion of cervix uteri  
19 malignant neoplasm of other site of cervix  
20 malignant neoplasm of cervical stump  
21 malignant neoplasm of squamocolumnar junction of cervix  
22 malignant neoplasm of other site of cervix nos  
23 malignant neoplasm of cervix uteri nos  
24 choriocarcinoma  
25 malignant neoplasm of corpus uteri, excluding isthmus  
26 malignant neoplasm of cornu of corpus uteri  
27 malignant neoplasm of fundus of corpus uteri  
28 malignant neoplasm of endometrium of corpus uteri  
29 malignant neoplasm of myometrium of corpus uteri  
30 malignant neoplasm of corpus uteri nos  
31 malignant neoplasm of isthmus of uterine body  
32 malignant neoplasm of lower uterine segment  
33 malignant neoplasm of isthmus of uterine body nos  
34 malignant neoplasm of overlapping lesion of corpus uteri  
35 malignant neoplasm of other site of uterine body  
36 malignant neoplasm of body of uterus nos  
37 malignant neoplasm of ovary and other uterine adnexa  
38 malignant neoplasm of round ligament  
39 malignant neoplasm of other site of uterine adnexa  
40 malignant neoplasm of uterine adnexa nos  
41 malignant neoplasm of gartner's duct  
42 malignant neoplasm of vaginal vault  
43 malignant neoplasm of vagina nos  
44 malignant neoplasm of greater vestibular (bartholin's) gland  
45 malignant neoplasm of labia majora nos  
46 malignant neoplasm of other specified female genital organ  
47 malignant neoplasm of female genital organ nos  
48 malignant neoplasm of undescended testis  
49 malignant neoplasm of ectopic testis  
50 malignant neoplasm of undescended testis nos

1 malignant neoplasm of penis and other male genital organs  
2 malignant neoplasm of body of penis  
3 malignant neoplasm of penis, part unspecified  
4 malignant neoplasm of other male genital organ  
5 malignant neoplasm of seminal vesicle  
6 malignant neoplasm of tunica vaginalis  
7 malignant neoplasm of other male genital organ nos  
8 malignant neoplasm of penis and other male genital organ nos  
9 malignant neoplasm of trigone of urinary bladder  
10 malignant neoplasm of dome of urinary bladder  
11 malignant neoplasm of lateral wall of urinary bladder  
12 malignant neoplasm of anterior wall of urinary bladder  
13 malignant neoplasm of posterior wall of urinary bladder  
14 malignant neoplasm of bladder neck  
15 medullomyoblastoma  
16 malignant neoplasm of ureteric orifice  
17 malignant neoplasm of other site of urinary bladder  
18 malignant neoplasm, overlapping lesion of bladder  
19 malignant neoplasm of urinary bladder nos  
20 malignant neoplasm of kidney parenchyma  
21 hypernephroma  
22 malignant neoplasm of ureteropelvic junction  
23 malignant neoplasm of renal pelvis nos  
24 malignant neoplasm of other urinary organs  
25 malignant neoplasm of overlapping lesion of urinary organs  
26 malignant neoplasm of kidney or urinary organs nos  
27 malignant neoplasm of genitourinary organ nos  
28 malignant neoplasm of ciliary body  
29 malignant neoplasm of iris  
30 malignant neoplasm of crystalline lens  
31 malignant neoplasm of sclera  
32 malignant neoplasm of eyeball nos  
33 malignant neoplasm of connective tissue of orbit  
34 malignant neoplasm of extraocular muscle of orbit  
35 malignant neoplasm of orbit nos  
36 malignant neoplasm of lacrimal gland  
37 malignant neoplasm of lacrimal sac  
38 malignant neoplasm of nasolacrimal duct  
39 malignant neoplasm of lacrimal duct nos  
40 malignant neoplasm of other specified site of eye  
41 malignant neoplasm of eye nos  
42 malignant neoplasm of basal ganglia  
43 malignant neoplasm of cerebral cortex  
44 malignant neoplasm of corpus striatum  
45 malignant neoplasm of globus pallidus  
46 malignant neoplasm of hypothalamus  
47 malignant neoplasm of thalamus  
48 malignant neoplasm of cerebrum nos  
49 malignant neoplasm of hippocampus  
50 malignant neoplasm of uncus

1 malignant neoplasm of temporal lobe nos  
2 malignant neoplasm of choroid plexus  
3 spindle cell melanoma, type a  
4 malignant neoplasm of floor of cerebral ventricle  
5 spindle cell melanoma - type a  
6 malignant neoplasm of cerebral ventricle nos  
7 malignant neoplasm of cerebral peduncle  
8 malignant neoplasm of medulla oblongata  
9 malignant neoplasm of midbrain  
10 malignant neoplasm of pons  
11 malignant neoplasm of other parts of brain  
12 malignant neoplasm of corpus callosum  
13 malignant neoplasm of tapetum  
14 malignant neoplasm of other part of brain nos  
15 malignant neoplasm of brain nos  
16 malignant neoplasm of olfactory bulb  
17 malignant neoplasm of cranial nerves nos  
18 malignant neoplasm of cerebral dura mater  
19 malignant neoplasm of cerebral arachnoid mater  
20 malignant neoplasm of cerebral pia mater  
21 malignant neoplasm of cerebral meninges nos  
22 malignant neoplasm of spinal dura mater  
23 malignant neoplasm of spinal arachnoid mater  
24 malignant neoplasm of spinal pia mater  
25 malignant neoplasm of spinal meninges nos  
26 malignant neoplasm of peripheral nerve of thorax  
27 malignant neoplasm of peripheral nerve of abdomen  
28 malignant neoplasm of peripheral nerve of pelvis  
29 malignant neoplasm of other specified part of nervous system  
30 malignant neoplasm of nervous system nos  
31 malignant neoplasm of adrenal gland nos  
32 malignant neoplasm of craniopharyngeal duct  
33 malignant neoplasm of aortic body and other paraganglia  
34 malignant neoplasm of aortic body or paraganglia nos  
35 malignant neoplasm of other specified endocrine gland  
36 malignant neoplasm of other and ill-defined sites  
37 malignant neoplasm of head, neck and face  
38 malignant neoplasm of head nos  
39 malignant neoplasm of cheek nos  
40 malignant neoplasm of nose nos  
41 malignant neoplasm of jaw nos  
42 malignant neoplasm of neck nos  
43 malignant neoplasm of supraclavicular fossa nos  
44 malignant neoplasm of head, neck and face nos  
45 malignant neoplasm of thorax  
46 malignant neoplasm of axilla nos  
47 malignant neoplasm of chest wall nos  
48 malignant neoplasm of intrathoracic site nos  
49 malignant neoplasm of thorax nos  
50 malignant neoplasm of abdomen  
51  
52  
53  
54  
55  
56  
57  
58  
59  
60

1 malignant neoplasm of inguinal region nos  
2 malignant neoplasm of pelvis nos  
3 malignant neoplasm of upper limb nos  
4 malignant neoplasm of lower limb nos  
5 malignant neoplasm of other specified sites  
6 malignant neoplasm of back nos  
7 malignant neoplasm of trunk nos  
8 malignant neoplasm of flank nos  
9 malignant neoplasm of specified site nos  
10 secondary malignant neoplasm of other respiratory organs  
11 secondary malignant neoplasm of other digestive organ  
12 secondary malignant neoplasm of other urinary organs  
13 secondary malignant neoplasm of other urinary organ nos  
14 secondary malignant neoplasm of skin of head  
15 secondary malignant neoplasm of skin of shoulder and arm  
16 secondary malignant neoplasm of skin of hip and leg  
17 secondary malignant neoplasm of skin nos  
18 secondary malignant neoplasm of brain and spinal cord  
19 secondary malignant neoplasm of brain or spinal cord nos  
20 secondary malignant neoplasm of other part of nervous system  
21 secondary malignant neoplasm of cervix uteri  
22 secondary cancer of the cervix  
23 secondary malignant neoplasm of epididymis and vas deferens  
24 secondary malignant neoplasm of other specified site nos  
25 malignant neoplasm of unspecified site  
26 other malignant neoplasm nos  
27 malignant neoplasms of independent (primary) multiple sites  
28 malignant neoplasm of unspecified site nos  
29 malignant neoplasm of other and unspecified site nos  
30 sertoli cell tumour with lipid storage  
31 tubular androblastoma with lipid storage  
32 lipid-rich sertoli cell tumour  
33 malignant mast cell tumours  
34 mast cell malignancy of unspecified site  
35 mast cell malignancy of lymph nodes of head, face and neck  
36 mast cell malignancy of intrathoracic lymph nodes  
37 mast cell malignancy of intra-abdominal lymph nodes  
38 mast cell malignancy of lymph nodes of axilla and upper limb  
39 mast cell malignancy of intrapelvic lymph nodes  
40 mast cell malignancy of spleen  
41 mast cell malignancy of lymph nodes of multiple sites  
42 malignant mast cell tumour nos  
43 granulocytic sarcoma  
44 nephroblastoma  
45 wilms' tumor  
46 embryonal nephroma  
47 embryonal adenosarcoma  
48 renal adenosarcoma  
49 nephroma  
50 wilms' tumour

1 recurrent tumour  
2 recurrent tumor  
3 recurrence of tumor  
4 adenocarcinoma, intestinal type  
5 carcinoma, intestinal type  
6 carcinoma - intestinal type  
7 hepatocellular carcinoma  
8 liver cell carcinoma  
9 hepatocarcinoma  
10 hepatoma, malignant  
11 hepatoma  
12 carcinoma in situ of lip, oral cavity and pharynx nos  
13 carcinoma in situ of oesophagus nos  
14 carcinoma in situ of stomach nos  
15 carcinoma in situ of splenic flexure of colon  
16 carcinoma in situ of colon nos  
17 carcinoma in situ of rectum and rectosigmoid junction  
18 carcinoma in situ of rectum or rectosigmoid junction nos  
19 carcinoma in situ of anus nos  
20 carcinoma in situ of other and unspecified small intestine  
21 carcinoma in situ of hepatic duct  
22 carcinoma in situ of liver or biliary system nos  
23 carcinoma in situ of other and unspecified digestive organs  
24 carcinoma in situ of digestive organs nos  
25 carcinoma in situ of respiratory system  
26 carcinoma in situ of thyroid cartilage  
27 carcinoma in situ of cricoid cartilage  
28 carcinoma in situ of arytenoid cartilage  
29 carcinoma in situ of cuneiform cartilage  
30 carcinoma in situ of aryepiglottic fold  
31 carcinoma in situ of vestibular fold  
32 carcinoma in situ of larynx nos  
33 carcinoma in situ of bronchus and lung  
34 carcinoma in situ of carina of bronchus  
35 carcinoma in situ of upper lobe bronchus and lung  
36 carcinoma in situ of middle lobe bronchus and lung  
37 carcinoma in situ of lower lobe bronchus and lung  
38 carcinoma in situ of bronchus or lung nos  
39 carcinoma in situ of respiratory organ nos  
40 carcinoma in situ of skin of eyelid including canthus  
41 carcinoma in situ of skin of auricle  
42 carcinoma in situ of skin of temple  
43 carcinoma in situ of skin of jaw  
44 carcinoma in situ of scalp and skin of neck  
45 carcinoma in situ of scalp  
46 carcinoma in situ of scalp or skin of neck nos  
47 carcinoma in situ of skin of trunk, excluding scrotum  
48 carcinoma in situ of skin of chest wall nos  
49 carcinoma in situ of skin of abdominal wall  
50 carcinoma in situ of skin of trunk nos



1 carcinoma in situ of skin of upper limb and shoulder  
2 carcinoma in situ of skin of upper arm  
3 carcinoma in situ of skin of lower arm  
4 carcinoma in situ of skin of upper limb or shoulder nos  
5 carcinoma in situ of skin of lower limb and hip  
6 carcinoma in situ of skin of lower leg  
7 carcinoma in situ of skin of lower limb or hip nos  
8 melanoma in situ of scalp and neck  
9 carcinoma in situ of other specified sites of skin  
10 carcinoma in situ of skin nos  
11 carcinoma in situ of breast and genitourinary system  
12 carcinoma in situ of breast  
13 carcinoma in situ of female genital organs nos  
14 carcinoma in situ of male genital organs nos  
15 carcinoma in situ of urinary organs nos  
16 carcinoma in situ of other and unspecified sites  
17 carcinoma in situ of other specified site  
18 carcinoma in situ of other specified site nos  
19 carcinoma in situ nos  
20 unspecified nature neoplasm  
21 neoplasm of unspecified nature  
22 neoplasm of unspecified nature of digestive system  
23 neoplasm of unspecified nature of respiratory system  
24 neoplasm of unspecified nature of bone, skin and soft tissue  
25 neoplasm of unspecified nature of bone  
26 neoplasm of unspecified nature of soft tissue  
27 neoplasm of unspecified nature of skin  
28 neoplasm of unspecified nature of breast  
29 neoplasm of unspecified nature of bladder  
30 neoplasm of unspecified nature of other genitourinary organs  
31 neoplasm of unspecified nature of brain  
32 neoplasm of unspecified nature of other specified sites  
33 neoplasm of unspecified nature nos  
34 [m]neoplasms nos  
35 [m]unspecified tumour cell nos  
36 [m]epithelial neoplasms nos  
37 [m]carcinoma nos  
38 [m]carcinoma, metastatic, nos  
39 [m]large cell carcinoma nos  
40 [m]carcinoma, undifferentiated type, nos  
41 [m]carcinoma, anaplastic type, nos  
42 [m]spheroidal cell carcinoma  
43 [m]small cell carcinoma nos  
44 [m]unspecified epithelial neoplasm  
45 [m]papillary carcinoma nos  
46 [m]verrucous carcinoma nos  
47 [m]squamous cell carcinoma nos  
48 [m]squamous cell carcinoma, metastatic nos  
49 [m]bowen's disease  
50 [m]papillary or squamous cell neoplasm nos

1 [m]basal cell neoplasms  
2 [m]basal cell carcinoma nos  
3 [m]basal cell neoplasm nos  
4 [m]transitional cell papilloma nos  
5 [m]transitional cell carcinoma nos  
6 [m]transitional cell papilloma or carcinoma nos  
7 [m]adenoma nos  
8 [m]adenocarcinoma nos  
9 [m]adenocarcinoma, metastatic, nos  
10 [m]pancreatic adenomas and carcinomas  
11 [m]pancreatic adenoma or carcinoma nos  
12 [m]gastrinoma and carcinomas  
13 [m]gastrinoma or carcinoma nos  
14 [m]hepatobiliary tract adenomas and carcinomas  
15 [m]bile duct adenoma  
16 [m]hepatobiliary adenoma or carcinoma nos  
17 [m]adenomatous and adenocarcinomatous polyps  
18 [m]adenomatous or adenocarcinomatous polyp nos  
19 [m]tubular adenomas and adenocarcinomas  
20 [m]tubular adenoma or adenocarcinoma nos  
21 [m]adenomatous or adenocarcinomatous polyps of the colon nos  
22 [m]solid carcinoma nos  
23 endometrioid adenofibroma, borderline malignancy  
24 [m]carcinoid tumours  
25 endometrioid cystadenofibroma, borderline malignancy  
26 endometrioid cystadenofibroma - borderline malignancy  
27 endometrioid adenofibroma - borderline malignancy  
28 [m]carcinoid tumour nos  
29 [m]carcinoid tumour, malignant  
30 [m]carcinoid tumour, nonargentaffin, nos  
31 [m]carcinoid tumour, nonargentaffin, malignant  
32 [m]carcinoid tumours nos  
33 [m]respiratory tract adenomas and adenocarcinomas  
34 [m]bronchial adenoma nos  
35 [m]respiratory tract adenoma or adenocarcinoma nos  
36 [m]papillary adenomas and adenocarcinomas  
37 [m]papillary adenocarcinoma nos  
38 [m]papillary adenoma or adenocarcinoma nos  
39 [m]villous adenomas and adenocarcinomas  
40 [m]villous adenoma nos  
41 [m]adenocarcinoma in villous adenoma  
42 fibrous histiocytoma  
43 [m]villous adenoma or adenocarcinoma nos  
44 [m]pituitary adenomas and carcinomas  
45 [m]pituitary adenoma or carcinoma nos  
46 [m]oxyphilic adenomas and adenocarcinomas  
47 [m]oxyphilic adenoma or adenocarcinoma nos  
48 [m]clear cell adenomas and adenocarcinomas  
49 [m]clear cell adenocarcinoma nos  
50 [m]clear cell adenoma or adenocarcinoma nos

1 [m]renal adenoma and carcinoma  
2 [m]renal adenoma or carcinoma nos  
3 [m]parathyroid adenomas and adenocarcinomas  
4 [m]parathyroid adenoma or adenocarcinoma nos  
5 [m]mixed cell adenoma and adenocarcinoma  
6 [m]mixed cell adenoma or adenocarcinoma nos  
7 [m]thyroid adenoma and adenocarcinoma  
8 [m]follicular adenocarcinoma nos  
9 [m]thyroid adenoma or adenocarcinoma nos  
10 [m]adrenal cortical tumours nos  
11 [m]endometrioid adenomas and carcinomas  
12 [m]endometrioid adenofibroma nos  
13 [m]endometrioid adenoma or carcinoma nos  
14 [m]adenoma or adenocarcinoma nos  
15 [m]skin appendage adenoma and carcinoma  
16 [m]skin appendage carcinoma  
17 [m]skin appendage adenoma or carcinoma nos  
18 [m]sweat gland adenoma and adenocarcinomas  
19 [m]sweat gland tumour nos  
20 [m]sweat gland adenocarcinoma  
21 [m]sweat gland adenoma or adenocarcinoma nos  
22 [m]apocrine adenoma and adenocarcinomas  
23 [m]apocrine adenoma or adenocarcinoma nos  
24 [m]sebaceous adenoma and adenocarcinoma  
25 [m]sebaceous adenoma or adenocarcinoma nos  
26 [m]ceruminous adenoma and adenocarcinoma  
27 [m]adnexal and skin appendage neoplasm nos  
28 [m]mucoepidermoid neoplasms  
29 [m]mucoepidermoid neoplasm nos  
30 [m]cystic, mucinous and serous neoplasms  
31 [m]cystadenoma and carcinoma  
32 [m]cystadenocarcinoma nos  
33 [m]cystadenoma or carcinoma nos  
34 [m]serous cystadenocarcinoma, nos  
35 [m]papillary cystadenocarcinoma, nos  
36 [m]mucinous cystadenocarcinoma nos  
37 [m]ovarian cystic, mucinous or serous neoplasm nos  
38 [m]mucinous adenoma and adenocarcinoma  
39 [m]mucinous adenoma or adenocarcinoma nos  
40 [m]signet ring carcinoma nos  
41 [m]cystic, mucinous or serous neoplasm nos  
42 [m]ductal, lobular and medullary neoplasms  
43 [m]comedocarcinoma nos  
44 [m]medullary carcinoma nos  
45 [m]intraductal carcinoma and lobular carcinoma in situ  
46 [m]lobular carcinoma nos  
47 [m]ductal, lobular or medullary neoplasm nos  
48 [m]acinar cell neoplasms  
49 [m]acinar cell tumour  
50 [m]acinar cell neoplasm nos

1 [m]complex epithelial neoplasms  
2 [m]thymoma nos  
3 [m]complex epithelial neoplasm nos  
4 [m]specialised gonadal neoplasms  
5 malignant down  
6 [m]thecal cell neoplasms  
7 [m]thecoma nos  
8 [m]theca cell carcinoma  
9 [m]thecal cell neoplasm nos  
10 [m]granulosa cell tumour nos  
11 [m]androblastoma nos  
12 [m]tubular androblastoma nos  
13 [m]leydig cell tumour nos  
14 [m]specialised gonadal neoplasm nos  
15 [m]paragangliomas and glomus tumours  
16 [m]paraganglioma nos  
17 [m]paraganglioma or glomus tumour nos  
18 [m]naevi and melanomas  
19 [m]precancerous melanosis nos  
20 [m]spindle cell melanoma nos  
21 [m]naevi or melanoma nos  
22 [m]soft tissue tumours and sarcomas nos  
23 [m]sarcoma nos  
24 [m]sarcomatosis nos  
25 [m]soft tissue tumour or sarcoma nos  
26 [m]fibromatous neoplasms  
27 retinoblastoma, differentiated  
28 retinoblastoma - differentiated  
29 [m]fibrous histiocytoma nos  
30 [m]fibroxanthoma nos  
31 [m]fibromatous neoplasm nos  
32 [m]liposarcoma nos  
33 [m]angiomyoliposarcoma  
34 [m]myomatous neoplasms  
35 [m]leiomyomatous neoplasms  
36 [m]intravascular leiomyomatosis  
37 [m]leiomyosarcoma nos  
38 [m]leiomyomatous neoplasm nos  
39 [m]angiomyomatous neoplasms  
40 [m]angiomyomatous neoplasm nos  
41 [m]myoma and myosarcoma  
42 [m]myoma or myosarcoma nos  
43 [m]rhabdomyomatous neoplasms  
44 [m]rhabdomyomatous neoplasm nos  
45 [m]myomatous neoplasm nos  
46 [m]mixed tumour, malignant, nos  
47 [m]mixed and stromal renal neoplasms  
48 [m]epithelial nephroblastoma  
49 [m]mesenchymal nephroblastoma  
50 [m]mixed or stromal renal neoplasm nos

1 [m]carcinosarcoma nos  
2 [m]complex mixed or stromal neoplasm nos  
3 [m]fibroepithelial neoplasms  
4 [m]brenner tumours  
5 [m]brenner tumour nos  
6 [m]cystosarcoma phyllodes nos  
7 [m]fibroepithelial neoplasm nos  
8 [m]synovial neoplasms  
9 [m]clear cell sarcoma of tendons and aponeuroses  
10 [m]synovial neoplasm nos  
11 [m]mesothelial neoplasms  
12 [m]mesothelioma, unspecified  
13 [m]mesothelial neoplasm nos  
14 [m]germ cell neoplasms  
15 [m]seminomas  
16 [m]seminoma nos  
17 [m]embryonal carcinoma nos  
18 [m]teratomas  
19 [m]teratoma nos  
20 [m]strumal neoplasms  
21 [m]strumal neoplasm nos  
22 [m]germ cell neoplasm nos  
23 [m]trophoblastic neoplasms  
24 [m]trophoblastic neoplasm nos  
25 [m]mesonephric tumour  
26 [m]blood vessel tumours  
27 [m]haemangioendothelioma nos  
28 [m]haemangiopericytic neoplasm nos  
29 [m]blood vessel tumour nos  
30 [m]lymphangioma nos  
31 [m]small cell osteosarcoma  
32 [m]osteoma or osteosarcoma nos  
33 [m]chondromatous neoplasms  
34 [m]chondrosarcoma nos  
35 [m]chondroblastoma nos  
36 [m]chondromatous neoplasm nos  
37 [m]giant cell tumours  
38 [m]giant cell tumour of bone nos  
39 [m]giant cell tumour of soft parts nos  
40 [m]giant cell tumour nos  
41 [m]miscellaneous bone tumours  
42 [m]miscellaneous bone tumour nos  
43 [m]ameloblastoma nos  
44 [m]odontogenic tumour nos  
45 [m]miscellaneous tumour nos  
46 [m]ependymoma nos  
47 [m]spongioblastoma nos  
48 gliomatosis cerebri  
49 [m]oligodendroglioma nos  
50 [m]medulloblastoma nos

1 [m]cerebellar sarcoma nos  
2 [m]neuroepitheliomatous neoplasms  
3 [m]ganglioneuromatous neoplasms  
4 [m]ganglioneuromatous neoplasm nos  
5 [m]medulloepithelioma nos  
6 [m]neuroepithelioma nos  
7 [m]retinoblastomas  
8 [m]retinoblastoma nos  
9 [m]neuroepitheliomatous neoplasm nos  
10 [m]meningiomas nos  
11 [m]haemangiopericytic meningioma  
12 [m]nerve sheath tumour nos  
13 [m]granular cell tumour nos  
14 [m]granular cell tumour or alveolar soft part sarcoma nos  
15 juxtacortical chondrosarcoma  
16 periosteal chondrosarcoma  
17 [m]microglioma  
18 [m]angioendotheliomatosis  
19 [m]mastocytoma nos  
20 [m]mast cell tumour nos  
21 [m]no microscopic confirmation of tumour  
22 [m]no microscopic confirmation of tumour, clinically nos  
23 [m]neoplasm morphology nos  
24 neoplasms otherwise specified  
25 [x]additional neoplasm classification terms  
26 [x]malignant neoplasm of digestive organs  
27 [x]other sarcomas of the liver  
28 [x]other specified carcinomas of liver  
29 [x]malignant neoplasm of intestinal tract, part unspecified  
30 [x]malignant neoplasm of bronchus or lung, unspecified  
31 [x]malignant neoplasm of mediastinum, part unspecified  
32 [x]malignant neoplasm of bone and articular cartilage  
33 [x]melanoma and other malignant neoplasms of skin  
34 [x]malignant melanoma of skin, unspecified  
35 [x]malignant neoplasm of skin, unspecified  
36 [x]malignant neoplasm of mesothelial and soft tissue  
37 [x]mesothelioma, unspecified  
38 [x]kaposi's sarcoma of multiple organs  
39 [x]kaposi's sarcoma, unspecified  
40 [x]malignant neoplasm of peritoneum, unspecified  
41 [x]malignant neoplasm overlapping lesion of skin  
42 [x]kaposi's sarcoma of other sites  
43 [x]malignant neoplasm of breast  
44 [x]malignant neoplasm of female genital organs  
45 [x]malignant neoplasm of uterine adnexa, unspecified  
46 [x]malignant neoplasm of female genital organ, unspecified  
47 [x]malignant neoplasm of male genital organs  
48 [x]malignant neoplasm of male genital organ, unspecified  
49 [x]malignant neoplasm of urinary tract  
50 [x]malignant neoplasm of urinary organ, unspecified

1 [x]malignant neoplasm of meninges, unspecified  
2 [x]malignant neoplasm of thyroid and other endocrine glands  
3 [x]malignant neoplasm of endocrine gland, unspecified  
4 [x]malignant neoplasm of other specified sites  
5 [x]secondary malignant neoplasm of other specified sites  
6 [x]malignant neoplasm without specification of site  
7 [x]in situ neoplasms  
8 [x]carcinoma in situ of other specified digestive organs  
9 [x]carcinoma in situ of digestive organ, unspecified  
10 [x]carcinoma in situ of other parts of respiratory system  
11 [x]carcinoma in situ of respiratory system, unspecified  
12 [x]melanoma in situ of other and unspecified parts of face  
13 [x]melanoma in situ of other sites  
14 [x]carcinoma in situ of skin of other sites  
15 [x]carcinoma in situ of skin, unspecified  
16 [x]carcinoma in situ of other parts of cervix  
17 [x]carcinoma in situ of other specified sites  
18 [x]melanoma in situ, unspecified  
19 [x]other carcinoma in situ of breast  
20 luteal cell tumour  
21 neoplasms nos  
22 diencephalic syndrome secondary to tumour  
23 gynandroblastoma  
24 odontogenic tumour, malignant  
25 odontogenic tumor, malignant  
26 odontogenic carcinoma  
27 odontogenic sarcoma  
28 intraosseous carcinoma  
29 carcinoma arising in an odontogenic cyst  
30 primary intraosseous carcinoma  
31 malignant odontogenic tumor  
32 other paraproteinaemias  
33 papillary cystic tumor  
34 solid pseudopapillary tumor  
35 solid and papillary epithelial neoplasm  
36 solid and cystic tumor  
37 solid and cystic tumour  
38 solid pseudopapillary tumour  
39 paraproteinaemia nos  
40 transitional carcinoma  
41 urothelial carcinoma  
42 tcc - transitional cell carcinoma  
43 ameloblastic sarcoma  
44 odontogenic fibrosarcoma  
45 myxoliposarcoma  
46 embryonal adenocarcinoma  
47 follicular adenocarcinoma, well differentiated  
48 follicular carcinoma, well differentiated  
49 follicular adenocarcinoma - well differentiated  
50 follicular carcinoma - well differentiated

1 melanotic neurofibroma  
2 germ cell tumor  
3 germ cell tumour  
4 embryonal carcinoma, polyembryonal type  
5 embryonal carcinoma - polyembryonal type  
6 myxosarcoma  
7 villous adenocarcinoma  
8 liposarcoma, well differentiated  
9 liposarcoma, differentiated  
10 sclerosing liposarcoma  
11 lipoma-like liposarcoma  
12 inflammatory liposarcoma  
13 liposarcoma - differentiated  
14 squamous cell carcinoma  
15 squamous carcinoma  
16 squamous cell epithelioma  
17 scc - squamous cell carcinoma  
18 squamous cell carcinoma, no icd-o subtype  
19 squamous cell carcinoma, no international classification of diseases for oncology subtype  
20 angiomyosarcoma  
21 cerebral degeneration due to neoplastic disease  
22 cerebellar ataxia due to neoplasia  
23 myelopathy due to neoplastic disease  
24 lynch syndrome  
25 pheochromocytoma, malignant  
26 pheochromocytoma, malignant  
27 pheochromoblastoma  
28 adrenal medullary paraganglioma, malignant  
29 pheochromoblastoma  
30 malignant pheochromocytoma  
31 multiple cranial nerve palsies in neoplastic disease  
32 nerve root and plexus compressions in neoplastic disease  
33 myasthenic syndrome due to disease ec  
34 myasthenic syndrome due to other malignancy  
35 myasthenic syndrome due to disease nos  
36 malignant myopia  
37 metastatic disseminated retinitis  
38 trabecular adenocarcinoma  
39 trabecular carcinoma  
40 cribriform carcinoma  
41 ductal carcinoma, cribriform type  
42 disorder of optic chiasm due to non-pituitary neoplasm  
43 visual pathway disorder due to neoplasm  
44 visual cortex disorder due to neoplasm  
45 endometrioid adenocarcinoma  
46 endometrioid cystadenocarcinoma  
47 mesothelioma, biphasic, malignant  
48 mesothelioma, biphasic  
49 biphasic mesothelioma  
50 malignant positional vertigo



1 clear cell adenocarcinoma, mesonephroid  
2 clear cell carcinoma  
3 mesonephroid clear cell adenocarcinoma  
4 noninfiltrating intraductal papillary adenocarcinoma  
5 noninfiltrating intraductal papillary carcinoma  
6 intraductal papillary adenocarcinoma  
7 intraductal papillary carcinoma  
8 ductal carcinoma in situ, papillary  
9 dcis, papillary  
10 non-infiltrating intraductal papillary adenocarcinoma  
11 non-infiltrating intraductal papillary carcinoma  
12 [x]paraneoplastic neuromyopathy and neuropathy  
13 basal cell tumor  
14 [x]hydrocephalus in neoplastic disease classified elsewhere  
15 men, type 1  
16 wermer syndrome  
17 mea, type 1  
18 multiple endocrine adenomatosis, type 1  
19 men 1 - multiple endocrine neoplasia syndrome type 1  
20 men 1 syndrome  
21 carotid body tumour  
22 carotid body tumor  
23 carotid body paraganglioma  
24 hypernephroid tumour  
25 hypernephroid tumor  
26 high grade prostatic intraepithelial neoplasia  
27 rhabdosarcoma  
28 rhabdomyosarcoma, no subtype  
29 vipoma, malignant  
30 vipoma  
31 granulosa cell-theca cell tumour  
32 granulosa cell-theca cell tumor  
33 theca cell-granulosa cell tumor  
34 theca cell-granulosa cell tumour  
35 theca cell - granulosa cell tumour  
36 granulosa cell - theca cell tumour  
37 theca cell - granulosa cell tumor  
38 granulosa cell - theca cell tumor  
39 mucocarcinoid tumor  
40 mucinous carcinoid  
41 mucocarcinoid tumour  
42 mucocarcinoid tumor, malignant  
43 mucocarcinoid tumour, malignant  
44 adenosarcoma  
45 pineoblastoma  
46 transitional pineal tumor  
47 pineal parenchymal tumor of intermediate differentiation  
48 mixed pineocytoma-pineoblastoma  
49 mixed pineal tumor  
50 mixed pineal tumour

1 pineal parenchymal tumour of intermediate differentiation  
2 transitional pineal tumour  
3 fast track cancer referral  
4 sympathetic paraganglioma  
5 glomus jugulare tumour  
6 glomus jugulare tumor  
7 jugular paraganglioma  
8 jugulotympanic paraganglioma  
9 strumal carcinoid  
10 struma ovarii and carcinoid  
11 sweat gland carcinoma  
12 sweat gland tumor, malignant  
13 sweat gland tumour, malignant  
14 pulmonary adenomatosis  
15 desmoplastic medulloblastoma  
16 circumscribed arachnoidal cerebellar sarcoma  
17 desmoplastic nodular medulloblastoma  
18 extra-adrenal paraganglioma, malignant  
19 nonchromaffin paraganglioma, malignant  
20 malignant non-chromaffin paraganglioma  
21 malignant extra-adrenal paraganglioma  
22 mixed germ cell tumor  
23 mixed teratoma and seminoma  
24 medullary adenocarcinoma  
25 inflammatory carcinoma  
26 inflammatory adenocarcinoma  
27 haemangioendothelioma, malignant  
28 hemangioendothelioma, malignant  
29 hemangioendothelial sarcoma  
30 haemangioendothelial sarcoma  
31 malignant haemangioendothelioma  
32 malignant hemangioendothelioma  
33 glomerular disorders in neoplastic diseases  
34 [m] angioendotheliomatosis  
35 osteosarcoma in paget's disease of bone  
36 osteosarcoma in paget disease of bone  
37 [m]abdominal desmoid  
38 [m]abdominal fibromatosis  
39 [m]acidophil carcinoma  
40 squamous metaplasia of bladder  
41 [m]acinar cell carcinoma  
42 [m]adamantinoma nos  
43 [m]adamantinoma of long bones  
44 [m]adamantinoma, malignant  
45 [m]adenoacanthoma  
46 [m]adenoameloblastoma  
47 [m]adenocarcinoma in adenomatous polposis coli  
48 [m]adenocarcinoma in adenomatous polyp  
49 [m]adenocarcinoma in situ  
50 [m]adenocarcinoma with apocrine metaplasia

1 [m]adenocarcinoma with cartilaginous and osseous metaplasia  
2 [m]adenocarcinoma with spindle cell metaplasia  
3 [m]adenocarcinoma with squamous metaplasia  
4 [m]adenocarcinoma, intestinal type  
5 [m]adenocarcinomas  
6 [m]adenoid cystic carcinoma  
7 [m]adenoid squamous cell carcinoma  
8 [m]adenoma and adenocarcinomas  
9 [m]adenoma or or adenocarcinoma in polyposis coli  
10 [m]adenomas  
11 [m]adenomas and adenocarcinomas  
12 [m]adenosarcoma  
13 [m]adenosquamous carcinoma  
14 sertoli-leydig cell tumour, well differentiated  
15 [m]adnexal and skin appendage neoplasms  
16 [m]adrenal cortical carcinoma  
17 [m]adrenal cortical tumours  
18 [m]adrenal rest tumour  
19 [m]adult cystic teratoma  
20 [m]aesthesioneuroblastoma  
21 [m]aesthesioneuroepithelioma  
22 [m]aggressive fibromatosis  
23 [m]alpha-cell tumour,malignant  
24 [m]alveolar adenocarcinoma  
25 [m]alveolar cell carcinoma  
26 [m]alveolar rhabdomyosarcoma  
27 [m]amelanotic melanoma  
28 [m]ameloblastic fibrosarcoma  
29 [x]severe vaginal dysplasia, not elsewhere classified  
30 [x]severe vulvar dysplasia, not elsewhere classified  
31 [m]ameloblastic odontosarcoma  
32 [m]ameloblastoma, malignant  
33 [m]androblastoma  
34 fibrous histiocytoma, malignant  
35 fibroxanthoma, malignant  
36 [m]androblastoma, malignant  
37 undifferentiated high grade pleomorphic sarcoma  
38 [m]angioblastoma  
39 [m]angioendothelioma  
40 [m]angiomyosarcoma  
41 [m]angiosarcoma  
42 [m]apocrine adenocarcinoma  
43 [m]argentaffinoma nos  
44 [m]arrhenoblastoma nos  
45 [m]arrhenoblastoma, malignant  
46 [m]astroblastoma  
47 [m]astrocytic glioma  
48 [m]astrocytoma, anaplastic type  
49 [m]astroganglioma  
50 [m]atypical fibrous histiocytoma

1 [m]atypical fibroxanthoma  
2 [m]balloon cell melanoma  
3 [m]basal cell carcinoma, fibroepithelial type  
4 [m]basal cell carcinoma, morphoea type  
5 [m]basal cell tumour  
6 [m]basaloid carcinoma  
7 [m]basophil carcinoma  
8 [m]basosquamous carcinoma  
9 [m]beta-cell tumour, malignant  
10 [m]bile duct carcinoma  
11 [m]bile duct cystadenocarcinoma  
12 [m]biliary tract adenomas and adenocarcinomas  
13 [m]brenner tumour, borderline malignancy  
14 [m]brenner tumour, malignant  
15 [m]brill - symmers' disease  
16 [m]bronchiolar carcinoma  
17 [m]brooke's tumour  
18 [m]brown fat tumour  
19 [m]c cell carcinoma  
20 [m]calcifying epithelial odontogenic tumour  
21 [m]carcinoid bronchial adenoma  
22 [m]carcinoma in situ nos  
23 [m]carcinoma simplex  
24 [m]carcinoma, diffuse type  
25 [m]carcinosarcoma, embryonal type  
26 [m]ceruminous adenocarcinoma  
27 [m]cholangiocarcinoma  
28 [m]cholangioma  
29 [m]chondroblastic osteosarcoma  
30 [m]chondroblastoma, malignant  
31 [m]chondroid syringoma  
32 [m]chondromatous giant cell tumour  
33 [m]chondromyxoid fibroma  
34 [m]chordoma  
35 infiltrating duct and lobular carcinoma  
36 infiltrating duct and lobular carcinoma in situ  
37 lobular and ductal carcinoma  
38 intraductal and lobular carcinoma  
39 infiltrating lobular carcinoma and ductal carcinoma in situ  
40 [m]choriocarcinoma combined with teratoma  
41 glioblastoma with sarcomatous component  
42 [m]chromaffin paraganglioma  
43 [m]chromaffin tumour  
44 granulocytic sarcoma  
45 [m]chromaffinoma  
46 [m]chromophobe carcinoma  
47 [m]chronic lymphoproliferative disease  
48 [m]clear cell adenofibroma  
49 [m]clear cell sarcoma of kidney  
50 [m]cloacogenic carcinoma

1 [m]codman's tumour  
2 [m]colloid adenocarcinoma  
3 [m]comedocarcinoma, noninfiltrating  
4 [m]composite carcinoid  
5 [m]congenital fibrosarcoma  
6 [m]cribriform carcinoma  
7 [m]cylindroid adenocarcinoma  
8 [m]cylindroid bronchial adenoma  
9 [m]cylindroma nos  
10 [m]cystadenofibroma nos  
11 monoclonal gammopathy of undetermined significance  
12 monoclonal gammopathy  
13 paraproteinemia  
14 mgus  
15 [m]cystosarcoma phyllodes, malignant  
16 squamous cell carcinoma, small cell, nonkeratinising  
17 squamous cell carcinoma, small cell, nonkeratinizing  
18 epidermoid carcinoma, small cell, nonkeratinizing  
19 epidermoid carcinoma, small cell, nonkeratinising  
20 non-keratinising epidermoid carcinoma - small cell  
21 non-keratinising squamous cell carcinoma - small cell  
22 non-keratinizing squamous cell carcinoma - small cell  
23 non-keratinizing epidermoid carcinoma - small cell  
24 [m]dermoid cyst  
25 [m]dermoid cyst with malignant transformation  
26 [m]dermoid nos  
27 [m]desmoid nos  
28 [m]desmoplastic fibroma  
29 [m]desmoplastic medulloblastoma  
30 [m]diffuse meningiomatosis  
31 [m]diktyoma  
32 [m]duct carcinoma nos  
33 [m]dysgerminoma  
34 [m]ecchondrosis  
35 hormone secretion by carcinoid tumor  
36 excessive serotonin secretion  
37 hormone secretion by carcinoid tumour  
38 hormonal tumour  
39 hormonal tumor  
40 [m]embryonal hepatoma  
41 [m]embryonal liposarcoma  
42 [m]embryonal rhabdomyosarcoma  
43 [m]embryonal sarcoma  
44 [m]embryonal teratoma  
45 adenocarcinoma, no subtype  
46 [m]endodermal sinus tumour  
47 [m]endometrial stromal sarcoma  
48 [m]endometrioid adenofibroma, borderline malignancy  
49 [m]endometrioid adenofibroma, malignant  
50 [m]endometrioid adenoma, borderline malignancy

1 [m]endometrioid carcinoma  
2 [m]endothelial bone sarcoma  
3 [m]eosinophil carcinoma  
4 [m]ependymblastoma  
5 [m]ependymoma, anaplastic type  
6 [m]epidermoid carcinoma in situ  
7 hemangiopericytoma  
8 perithelioma  
9 [m]epidermoid carcinoma nos  
10 hemangiopericytic meningioma [obs]  
11 haemangiopericytic meningioma [obs]  
12 [m]epidermoid carcinoma, keratinising type  
13 [m]epithelioid cell melanoma  
14 [m]epithelioid cell sarcoma  
15 [m]epithelioid haemangioendothelioma nos  
16 [m]epithelioid leiomyosarcoma  
17 [m]epithelioid mesothelioma, malignant  
18 [m]epithelioma adenoides cyst  
19 [m]epithelioma, malignant  
20 [m]ewing's sarcoma  
21 [m]extra-abdominal desmoid  
22 [m]extra-adrenal paraganglioma, malignant  
23 [m]extra-adrenal paraganglioma, nos  
24 [m]fascial fibrosarcoma  
25 [m]fibrillary astrocytoma  
26 [m]fibroblastic osteosarcoma  
27 [m]fibrochondrosarcoma  
28 alveolar adenocarcinoma  
29 alveolar carcinoma  
30 [m]fibroliposarcoma  
31 [m]fibromyxosarcoma  
32 [m]fibrous histiocytoma, malignant  
33 [m]fibrous mesothelioma, malignant  
34 [m]fibroxanthoma, malignant  
35 [m]follicular adenocarcinoma, trabecular type  
36 [m]follicular adenocarcinoma, well differentiated type  
37 [m]g cell tumour nos  
38 [m]g cell tumour, malignant  
39 [m]gangliocytoma  
40 [m]ganglioglioma  
41 [m]ganglioneuroblastoma  
42 [m]ganglioneuroma  
43 [m]gastrinoma, malignant  
44 [m]gelatinous adenocarcinoma  
45 [m]gemistocytic astrocytoma  
46 [m]gemistocytoma  
47 [m]germinoma  
48 [m]giant cell and spindle cell carcinoma  
49 [m]giant cell bone sarcoma  
50 [m]giant cell carcinoma

1 [m]giant cell glioblastoma  
2 [m]giant cell tumour of bone, malignant  
3 [m]giant pigmented naevus  
4 [m]glioblastoma multiforme  
5 [m]glioblastoma with sarcomatous component  
6 [m]glioma nos  
7 [m]glioma, malignant  
8 [m]gliomatosis cerebri  
9 [m]glioneuroma  
10 [m]gliosarcoma  
11 [m]glomangiosarcoma  
12 [m]glomoid sarcoma  
13 [m]glomus tumour  
14 [m]glucagonoma, malignant  
15 [m]goblet cell tumour  
16 [m]gonadal stromal tumour  
17 [m]gonadoblastoma  
18 [m]gonocytoma  
19 [m]granular cell carcinoma  
20 [m]granular cell tumour, malignant  
21 [m]granular cell tumours and alveolar soft part sarcoma  
22 [m]granulosa cell tumour, malignant  
23 [m]granulosa cell-theca cell tumour  
24 [m]grawitz tumour  
25 [m]gynandroblastoma  
26 [m]haemangioblastoma  
27 [m]haemangioendothelioma, malignant  
28 [m]haemangiomatous tumours  
29 [m]haemangiopericytic neoplasms  
30 [m]haemangiopericytoma, malignant  
31 [m]haemangiosarcoma  
32 [m]hepatoblastoma  
33 epithelioid cell melanoma  
34 [m]hepatocholangiocarcinoma  
35 [m]hepatoma nos  
36 [m]hepatoma, malignant  
37 synovial sarcoma, spindle cell  
38 synovial sarcoma, monophasic fibrous  
39 synovial sarcoma - spindle cell  
40 [m]histiocytoma nos  
41 mixed basal-squamous cell carcinoma  
42 mixed basal - squamous cell carcinoma  
43 basisquamous cell carcinoma  
44 [m]hurthle cell adenocarcinoma  
45 persistent intestinal end of vitelline duct  
46 md - meckel's diverticulum  
47 meckel diverticulum  
48 [m]hypernephroid tumour  
49 [m]hypernephroma  
50 [m]immature teratoma

1 [m]infantile embryonal carcinoma  
2 [m]infantile fibrosarcoma  
3 [m]infiltrating duct carcinoma  
4 [m]infiltrating ductular carcinoma  
5 [m]inflammatory carcinoma  
6 [m]insulinoma, malignant  
7 [m]interstitial cell tumour nos  
8 [m]interstitial cell tumour, malignant  
9 [m]intracystic carcinoma nos  
10 [m]intraductal carcinoma, noninfiltrating nos  
11 [m]intraepidermal carcinoma nos  
12 [m]intraepit neop,grade iii,of cervix, vulva and vagina  
13 [m]intraepithelial carcinoma nos  
14 [m]intraepithelial squamous cell carcinoma  
15 [m]intraosseous carcinoma  
16 [m]intravascular bronchial alveolar tumour  
17 [m]invasive fibroma  
18 [m]invasive mole nos  
19 [m]islet cell carcinoma  
20 [m]jugular paraganglioma  
21 tumour-induced hyperinsulinaemia  
22 hyperinsulinaemia due to ectopic tumour source  
23 [m]juvenile astrocytoma  
24 [m]juvenile breast carcinoma  
25 [m]juxtacortical chondrosarcoma  
26 [m]juxtacortical osteogenic sarcoma  
27 [m]krukenberg tumour  
28 [m]kupffer cell sarcoma  
29 [m]leiomyoblastoma  
30 [m]lentigo maligna  
31 synovial osteochondromatosis  
32 synovial osteochondromatosis of shoulder  
33 [m]lentigo maligna melanoma  
34 synovial osteochondromatosis of acromioclavicular joint  
35 synovial osteochondromatosis of elbow  
36 synovial osteochondromatosis of wrist  
37 synovial osteochondromatosis of hip  
38 [m]leptomeningeal sarcoma  
39 synovial osteochondromatosis of knee  
40 synovial osteochondromatosis of ankle  
41 synovial osteochondromatosis of talonavicular joint  
42 synovial osteochondromatosis of other tarsal joint  
43 [m]leydig cell tumour  
44 [m]leydig cell tumour, malignant  
45 [m]lipid cell tumour of ovary  
46 progressive malignant polyserositis  
47 linitis plastica  
48 [m]liposarcoma, well differentiated type  
49 [m]liver cell carcinoma  
50 [m]lobular carcinoma in situ



1 [m]lymphangiomatous tumours  
2 [m]lymphangiomyomatosis  
3 [m]lymphangiosarcoma  
4 [m]lymphoblastoma nos  
5 [m]lymphoepithelial carcinoma  
6 [m]malherbe's calcified epithelioma  
7 [m]malig lymph, follicular centre cell, cleaved, follicular  
8 [m]malig lymph, lymphocytic, intermediate different, nodular  
9 [m]malig lymph, lymphocytic, poorly differentiated, nodular  
10 [m]malig lymph, follicular centre cell, noncleaved, follicular  
11 [m]malignant giant cell tumour of soft parts  
12 [m]malignant melanoma in giant pigmented naevus  
13 [m]malignant melanoma in junctional naevus  
14 paget's disease-cervical spine  
15 paget's disease-thoracic spine  
16 paget's disease-lumbar spine  
17 [m]malignant melanoma in precancerous melanosis  
18 paget's disease-sacrum  
19 paget's disease-coccyx  
20 paget's disease-clavicle  
21 paget's disease-scapula  
22 paget's disease-radius  
23 paget's disease-ulna  
24 paget's disease-carpal bone  
25 paget's disease-metacarpal  
26 paget's disease-femur  
27 paget's disease-patella  
28 paget's disease-tibia  
29 paget's disease-fibula  
30 paget's disease-calcaneum  
31 paget's disease-talus  
32 paget's disease-other tarsal bone  
33 paget's disease-metatarsal  
34 paget's disease-multiple sites  
35 paget's disease os  
36 paget's disease nos  
37 osteitis deformans in neoplastic disease  
38 [m]malignant teratoma, intermediate type  
39 [m]malignant teratoma, trophoblastic  
40 [m]malignant teratoma, undifferentiated type  
41 [m]malignant tumour, fusiform cell type  
42 [m]malignant tumour, giant cell type  
43 undifferentiated carcinoma  
44 [m]malignant tumour, small cell type  
45 [m]masculinovoblastoma  
46 [m]mast cell sarcoma  
47 [m]mast cell tumours  
48 [m]mature teratoma  
49 [m]medullary carcinoma with amyloid stroma  
50 fracture of bone in neoplastic disease

1 brown tumour of hyperparathyroidism  
2 [m]medullomyoblastoma  
3 [m]melanoameloblastoma  
4 [m]melanocarcinoma  
5 [m]melanoma nos  
6 [m]melanosarcoma nos  
7 [m]melanotic neuroectodermal tumour  
8 astroglioma  
9 astrocytic glioma  
10 cystic astrocytoma  
11 diffuse astrocytoma, low grade  
12 [m]melanotic neurofibroma  
13 diffuse astrocytoma  
14 astrocytoma, low grade  
15 astrocytoma, no icd-o subtype  
16 astrocytoma, no international classification of diseases for oncology subtype  
17 [m]melanotic progonoma  
18 [m]meningeal sarcomatosis  
19 [m]meningioma, malignant  
20 [m]meningothelial sarcoma  
21 [m]mesenchymal chondrosarcoma  
22 [m]mesenchymoma nos  
23 [m]mesenchymoma, malignant  
24 [m]mesodermal mixed tumour  
25 [m]mesonephroma, malignant  
26 [m]mesonephromas  
27 [m]mesothelioma, biphasic type, malignant  
28 [m]mesothelioma, malignant  
29 [m]metastatic signet ring cell carcinoma  
30 [m]metatypical carcinoma  
31 mixed cell adenocarcinoma  
32 [m]miscellaneous reticuloendothelial neoplasm nos  
33 [m]miscellaneous reticuloendothelial neoplasms  
34 [m]miscellaneous tumours  
35 hemangiosarcoma  
36 [m]mixed acidophil-basophil carcinoma  
37 diktyoma  
38 diktyoma, malignant  
39 [m]mixed cell adenocarcinoma  
40 [m]mixed cell rhabdomyosarcoma  
41 [m]mixed epithelioid and spindle melanoma  
42 papillary epidermoid carcinoma  
43 [m]mixed glioma  
44 [m]mixed islet cell and exocrine adenocarcinoma  
45 [m]mixed glioma  
46 [m]mixed tumour nos  
47 [m]mixed type liposarcoma  
48 [m]monstrocellular sarcoma  
49 [m]morphology of neoplasms  
50 [m]mucin-producing adenocarcinoma

1 [m]mucinous adenocarcinoma  
2 [m]mucinous adenofibroma  
3 [m]mucinous cystadenoma, borderline malignancy  
4 [m]mucoepidermoid carcinoma  
5 [m]mucoepidermoid tumour  
6 [m]mucooid adenocarcionoma  
7 [m]mucooid cell carcinoma  
8 balloon cell melanoma  
9 [m]mucous adenocarcinoma  
10 [m]mullerian mixed tumour  
11 [m]multicentric basal cell carcinoma  
12 [m]multiple endocrine adenomas  
13 [m]multiple haemorrhagic sarcoma  
14 [m]multiple meningiomas  
15 intraepidermal epithelioma of jadassohn  
16 [m]myoepithelioma  
17 [m]myofibromatosis  
18 cholangioma  
19 [m]myosarcoma  
20 [m]myxoid chondrosarcoma  
21 [m]myxoid liposarcoma  
22 [m]myxoliposarcoma  
23 [m]myxopapillary ependymoma  
24 chondromyxoid fibroma  
25 cmf - chondromyxoid fibroma  
26 [m]naevocarcinoma  
27 tumor cells  
28 tumour cells  
29 [m]neoplasm, malig, uncertain whether primary or metastatic  
30 [m]neoplasm, malignant  
31 [m]neoplasm, metastatic  
32 [m]nephromas and nephroblastomas  
33 [m]nerve sheath tumour  
34 [m]neurilemmoma nos  
35 [m]neurilemmoma, malignant  
36 [m]neuroastrocytoma  
37 [m]neurocytoma  
38 meckel's diverticulum, unspecified  
39 meckel's diverticulum nos  
40 [m]neurofibrosarcoma  
41 primitive neuroectodermal tumour  
42 primitive neuroectodermal tumor  
43 supratentorial pnet  
44 pnet  
45 central primitive neuroectodermal tumor  
46 cpnet  
47 central primitive neuroectodermal tumour  
48 pnet - primitive neuroectodermal tumour  
49 pnet - primitive neuroectodermal tumor  
50 [m]no microscopic confirmation of tumour, clinically malig

1 [m]no microscopic confirmation tumour, clinically metastatic  
2 [m]nodular melanoma  
3 [m]nonencapsulated sclerosing carcinoma  
4 [m]noninfiltrating intracystic carcinoma  
5 [m]noninfiltrating intraductal papillary adenocarcinoma  
6 [m]oat cell carcinoma  
7 [m]odontoameloblastoma  
8 [m]odontogenic fibrosarcoma  
9 [m]odontogenic tumour nos  
10 mucoepidermoid tumour  
11 [m]odontogenic tumour, malignant  
12 mucoepidermoid tumor [obs]  
13 malignant melanoma, regressing  
14 [m]odontogenic tumours  
15 [m]olfactory neuroblastoma  
16 [m]olfactory neuroepithelioma  
17 [m]olfactory neurogenic tumour  
18 [m]oligodendroblastoma  
19 [m]oligodendroglioma, anaplastic type  
20 [m]onocytic adenocarcinoma  
21 [m]orchioblastoma  
22 [m]osteoblastic sarcoma  
23 craniopharyngioma  
24 rathke's pouch tumor  
25 rathke's pouch tumour  
26 [m]osteochondrosarcoma  
27 [m]osteoclastoma  
28 [m]osteoclastoma, malignant  
29 [m]osteofibrosarcoma  
30 [m]osteogenic sarcoma nos  
31 [m]osteosarcoma in paget's disease of bone  
32 [m]ovarian cystadenoma or carcinoma  
33 [m]ovarian mucinous tumour  
34 [m]oxyphilic adenocarcinoma  
35 [m]pacinian tumour  
36 [m]paget's disease and infiltrating breast duct carcinoma  
37 [m]paget's disease, breast  
38 [m]paget's disease, extramammary, exc paget's disease bone  
39 [m]paget's disease, mammary  
40 spindle cell melanoma, type b  
41 spindle cell melanoma - type b  
42 [m]papillary and follicular adenocarcinoma  
43 [m]papillary carcinoma in situ  
44 [m]papillary cystadenoma, borderline malignancy  
45 [m]papillary ependymoma  
46 [m]papillary epidermoid carcinoma  
47 [m]papillary meningioma  
48 [m]papillary mucinous cystadenocarcinoma  
49 [m]papillary serous cystadenocarcinoma  
50 [m]papillary serous cystadenoma, borderline malignancy

1 [m]papillary squamous cell carcinoma  
2 [m]papillary transitional cell carcinoma  
3 [m]parafollicular cell carcinoma  
4 [m]paraganglioma, malignant  
5 [m]parasympathetic paraganglioma  
6 [m]parosteal osteosarcoma  
7 [m]periosteal fibrosarcoma  
8 [m]periosteal osteogenic sarcoma  
9 [m]phaeochromoblastoma  
10 [m]phaeochromocytoma, malignant  
11 [m]pick's tubular adenoma  
12 [m]pilocytic astrocytoma  
13 [m]piloid astrocytoma  
14 [m]pinealoma  
15 [m]pineoblastoma  
16 [m]pineocytoma  
17 [m]pleomorphic adenoma  
18 [m]pleomorphic carcinoma  
19 [m]pleomorphic cell sarcoma  
20 [m]pleomorphic liposarcoma  
21 [m]pleomorphic rhabdomyosarcoma  
22 [m]pneumoblastoma  
23 [m]polyembryoma  
24 [m]polyembryonal embryonal carcinoma  
25 [m]polygonal cell carcinoma  
26 masculinovoblastoma  
27 steroid cell tumour  
28 lipoid cell tumour of ovary  
29 [m]polyvesicular vitelline tumour  
30 [m]primitive polar spongioblastoma  
31 [m]protoplasmic astrocytoma  
32 [m]pseudomucinous adenocarcinoma  
33 [m]pseudomucinous cystadenoma nos  
34 [m]pseudosarcomatous carcinoma  
35 [m]pulmonary adenomatosis  
36 [m]renal cell carcinoma  
37 [m]reninoma  
38 [m]reserve cell carcinoma  
39 diffuse meningiomas  
40 multiple meningiomas  
41 [m]reticulum cell sarcoma nos  
42 [m]retinal angle tumour  
43 [m]retinoblastoma, differentiated type  
44 [m]retinoblastoma, undifferentiated type  
45 [m]round cell carcinoma  
46 [m]round cell liposarcoma  
47 [m]round cell sarcoma  
48 [m]sarcoma botryoides  
49 [m]schneiderian carcinoma  
50 [m]schwannoma nos

1 [m]schwannoma, malignant  
2 [m]scirrhous adenocarcinoma  
3 [m]secondary carcinoma  
4 [m]secondary neoplasm  
5 [m]secretory breast carcinoma  
6 [m]seminoma, anaplastic type  
7 [m]serous adenofibroma  
8 [m]serous cystadenoma, borderline malignancy  
9 [m]serous surface papillary carcinoma  
10 [m]sertoli cell adenoma  
11 [m]sertoli cell carcinoma  
12 [m]sertoli cell tumour  
13 [m]sertoli cell tumour with lipid storage  
14 [m]sertoli-leydig cell tumour  
15 [m]sex cord-stromal tumour  
16 [m]signet ring carcinoma  
17 [m]signet ring cell carcinoma  
18 [m]small cell carcinoma, fusiform cell type  
19 [m]small cell sarcoma  
20 [m]smooth muscle tumour nos  
21 [m]solid carcinoma with amyloid stroma  
22 [m]solid teratoma  
23 [m]spermatocytic seminoma  
24 [m]spindle cell carcinoma  
25 [m]spindle cell melanoma, type a  
26 [m]spindle cell melanoma, type b  
27 [m]spindle cell sarcoma  
28 [m]spinous cell carcinoma  
29 [m]spongioblastoma multiforme  
30 [m]spongioblastoma polare  
31 [m]spongioneuroblastoma  
32 [m]squamous cell ca-in-situ, questionable stromal invasion  
33 [m]squamous cell carcinoma, large cell, non-keratinising  
34 [m]squamous cell carcinoma, microinvasive  
35 [m]squamous cell carcinoma, small cell, non-keratinising  
36 lymphmatoid granulomatosis  
37 [m]squamous cell carcinoma, spindle cell type  
38 malignant hydatidiform mole  
39 [m]squamous odontogenic tumour  
40 [m]stromal endometriosis  
41 [m]struma ovarii, malignant  
42 [m]strumal carcinoid  
43 renal cell carcinoma  
44 renal cell adenocarcinoma  
45 grawitz tumor  
46 hypernephroma  
47 grawitz tumour  
48 [m]subependymal astrocytoma nos  
49 [m]subependymal astrocytoma nos  
50 [m]subependymal glioma

1  
2 [m]superficial spreading adenocarcinoma  
3 [m]superficial spreading melanoma  
4 [m]sympathetic paraganglioma  
5 [m]sympathicoblastoma  
6 [m]synovial sarcoma, biphasic type  
7 [m]synovial sarcoma, epithelioid cell type  
8 [m]synovial sarcoma, spindle cell type  
9 [m]telangiectatic osteosarcoma  
10 [m]teratoblastoma, malignant  
11 [m]teratocarcinoma  
12 [m]teratoid medulloepithelioma  
13 [m]teratoma nos  
14 [m]testicular adenoma  
15 secretory carcinoma of the breast  
16 [m]thymoma  
17 [m]thymoma, malignant  
18 [m]trabecular adenocarcinoma  
19 [m]transitional cell carcinoma in situ  
20 [m]transitional cell carcinoma, spindle cell type  
21 [m]transitional cell papilloma, inverted type  
22 [m]transitional cell papillomas and carcinomas  
23 [m]tubular adenocarcinoma  
24 [m]tubular androblastoma with lipid storage  
25 [m]tumour cells, malignant  
26 [m]tumour embolism  
27 [m]tumour embolus  
28 [m]tumour morphology  
29 [m]tumourlet  
30 [m]turban tumour  
31 [m]urinary bladder papilloma  
32 [m]urothelial carcinoma  
33 [m]urothelial papilloma  
34 brenner tumour, malignant  
35 brenner tumor, malignant  
36 malignant brenner tumour  
37 malignant brenner tumor  
38 [m]verrucous epidermoid carcinoma  
39 [m]verrucous squamous cell carcinoma  
40 [m]villous adenocarcinoma  
41 [m]villous papilloma  
42 [m]warthin's tumour  
43 [m]water-clear cell adenocarcinoma  
44 [m]wilms' tumour  
45 [m]wolffian duct carcinoma  
46 [m]wuchernde struma langhans  
47 [m]yolk sac tumour  
48 epithelioid leiomyosarcoma  
49 sievert syndrome  
50 giant cell carcinoma  
51 teratoma, differentiated

1 adult teratoma  
2 cystic teratoma  
3 mature teratoma  
4 differentiated teratoma  
5 [so] subsidiary classification of operation sites nos  
6 [so] subsidiary classification of operation sites os  
7 pulmonary blastoma  
8 pneumoblastoma  
9 round cell liposarcoma  
10 lipoblastic liposarcoma  
11 basal cell carcinoma, fibroepithelial  
12 pinkus tumor  
13 fibroepithelioma  
14 fibroepithelioma of pinkus type  
15 fibroepithelial basal cell carcinoma, pinkus type  
16 pinkus tumour  
17 calcifying epithelioma of malherbe  
18 hair matrix tumour  
19 urinary bladder instillation of anticarcinogenic agent  
20 malignant melanoma in hutchinson's melanotic freckle  
21 lentigo maligna melanoma  
22 malignant melanoma in hutchinson melanotic freckle  
23 mixed mesenchymal tumor  
24 mixed mesenchymal tumour  
25 mesenchymomas  
26 giant cell glioblastoma  
27 monstrocellular sarcoma [obs]  
28 [so]digestive tract and abdominal organs nos  
29 [so]digestive tract or abdominal organs os  
30 pigmented epitheliomatosis  
31 choriocarcinoma  
32 chorionepithelioma  
33 chorioepithelioma  
34 syncytioma  
35 choriocarcinoma, no icd-o subtype  
36 choriocarcinoma, no international classification of diseases for oncology subtype  
37 [so]endocrine, breast and special senses nos  
38 [so]endocrine, breast or special senses os  
39 leydig cell tumor  
40 interstitial cell tumor  
41 interstitial cell tumour  
42 leydig cell tumour, no icd-o subtype  
43 leydig cell tumor, no icd-o subtype  
44 leydig cell tumor, no international classification of diseases for oncology subtype  
45 embryonal hepatoma  
46 hbl - hepatoblastoma  
47 papilloma of bladder  
48 papilloma of urinary bladder  
49 transitional cell papilloma  
50 mesenteric fibromatosis



1 retroperitoneal fibromatosis  
2 musculo-aponeurotic fibromatosis  
3 acinic cell adenocarcinoma  
4 acinar adenocarcinoma  
5 acinar carcinoma  
6 squamous cell carcinoma, large cell, nonkeratinising  
7 squamous cell carcinoma, large cell, nonkeratinizing  
8 epidermoid carcinoma, large cell, nonkeratinizing  
9 squamous cell carcinoma, nonkeratinizing  
10 epidermoid carcinoma, large cell, nonkeratinising  
11 squamous cell carcinoma, nonkeratinising  
12 non-keratinising squamous cell carcinoma  
13 non-keratinising epidermoid carcinoma - large cell  
14 non-keratinising squamous cell carcinoma - large cell  
15 non-keratinizing squamous cell carcinoma - large cell  
16 non-keratinizing squamous cell carcinoma  
17 non-keratinizing epidermoid carcinoma - large cell  
18 poisoning caused by antineoplastic antibiotic  
19 antineoplastic antibiotic poisoning nos  
20 carcinoma simplex  
21 transitional cell papilloma, inverted  
22 transitional papilloma, inverted  
23 schneiderian papilloma, inverted  
24 oncocytic schneiderian papilloma  
25 cylindrical cell papilloma  
26 columnar cell papilloma  
27 inverted transitional cell papilloma  
28 polyglandular activity in multiple endocrine adenomatosis  
29 familial polyendocrine adenomatosis  
30 multiple endocrine neoplasia  
31 men - multiple endocrine neoplasia  
32 multiple endocrine tumasia  
33 mea - multiple endocrine adenomatosis  
34 angioendotheliomatosis  
35 basophil adenocarcinoma  
36 mucoid cell adenocarcinoma  
37 extra-abdominal desmoid  
38 invasive fibroma  
39 desmoid-type fibromatosis  
40 desmoid tumor  
41 desmoid tumour  
42 adenocarcinoma in multiple adenomatous polyps  
43 malignant giant cell tumour of soft parts  
44 malignant giant cell tumor of soft parts  
45 malignant giant cell tumour of soft tissue  
46 malignant giant cell tumor of soft tissue  
47 enterochromaffin cell carcinoid  
48 carcinoid tumor, argentaffin, malignant  
49 argentaffinoma, malignant  
50 serotonin producing carcinoid

1 ec cell carcinoid  
2 carcinoid tumour, argentaffin, malignant  
3 malignant carcinoid tumour - argentaffin  
4 malignant carcinoid tumor - argentaffin  
5 [so]other operation sites and laterality  
6 malignant argentaffinoma  
7 [so]other specified part of respiratory tract or mouth  
8 astroblastoma  
9 odontoameloblastoma  
10 liposarcoma  
11 fibroliposarcoma  
12 liposarcoma morphology  
13 liposarcoma, no icd-o subtype  
14 liposarcoma, no international classification of diseases for oncology subtype  
15 [so]respiratory tract and mouth nos  
16 adverse reaction to antineoplastic antibiotics  
17 kaposi's sarcoma  
18 multiple hemorrhagic sarcoma  
19 multiple haemorrhagic sarcoma  
20 kaposi's sarcoma, morphology  
21 kaposi sarcoma, morphology  
22 systemic tissue mast cell disease  
23 bile duct cystadenocarcinoma  
24 mixed epithelioid and spindle cell melanoma  
25 acidophil carcinoma  
26 eosinophil adenocarcinoma  
27 acidophil adenocarcinoma  
28 eosinophil carcinoma  
29 mixed adenoneuroendocrine carcinoma  
30 composite carcinoid  
31 combined carcinoid and adenocarcinoma  
32 mixed carcinoid-adenocarcinoma  
33 adenocarcinoma in situ in tubulovillous adenoma  
34 ais - adenocarcinoma in situ  
35 heart base tumor  
36 nonchromaffin paraganglioma  
37 heart base tumour  
38 desmoplastic melanoma, malignant  
39 neurotropic melanoma, malignant  
40 desmoplastic melanoma, amelanotic  
41 malignant neurotropic melanoma  
42 congenital fibrosarcoma  
43 combined hepatocellular carcinoma and cholangiocarcinoma  
44 mixed hepatocellular and bile duct carcinoma  
45 hepatocholangiocarcinoma  
46 parasympathetic paraganglioma  
47 malignant megakaryocytosis  
48 thecoma  
49 theca cell tumor  
50 fibrothecoma

1 theca cell tumour  
2 thecoma, no icd-o subtype  
3 thecoma, no international classification of diseases for oncology subtype  
4 melanoma in situ of skin  
5 aortic body tumour  
6 aortic body tumor  
7 aortic body paraganglioma  
8 aorticopulmonary paraganglioma  
9 urothelial carcinoma in situ  
10 pancreatoblastoma  
11 fibrosarcoma  
12 olfactory neurogenic tumour  
13 olfactory neurogenic tumor  
14 epithelioid haemangioendothelioma, malignant  
15 epithelioid hemangioendothelioma, malignant  
16 intravascular bronchial alveolar tumor [obs]  
17 intravascular bronchial alveolar tumour [obs]  
18 epithelioid haemangioendothelioma  
19 epithelioid hemangioendothelioma  
20 adrenal rest tumour  
21 fibrous mesothelioma  
22 spindled mesothelioma  
23 sarcomatoid mesothelioma  
24 desmoplastic mesothelioma  
25 paget's disease and intraductal carcinoma of breast  
26 paget disease and intraductal carcinoma of breast  
27 sebaceous adenocarcinoma  
28 sebaceous carcinoma  
29 t-gamma lymphoproliferative disease  
30 protoplasmic astrocytoma  
31 ssm - superficial spreading melanoma  
32 ssmm - superficial spreading melanoma  
33 osteoblastoma  
34 neoplasia  
35 ng - neoplastic growth  
36 neoplastic growth  
37 new growth  
38 ng - new growth  
39 astrocytoma, anaplastic  
40 malignant astrocytoma  
41 [v]follow-up exam aft combined treatment for malig neoplasm  
42 skin appendage tumour  
43 adnexal tumour  
44 [v]follow-up examination aft surgery for malignant neoplasm  
45 [v]folow-up exam aft other treatment for malignant neoplasm  
46 [v]folow-up exam aft unspec treatment for malignant neoplasm  
47 teratoma  
48 solid teratoma  
49 teratoma, no icd-o subtype  
50 teratoma, no international classification of diseases for oncology subtype

1 neuroendocrine carcinoma  
2 synovial sarcoma, epithelioid cell  
3 synovial sarcoma - epithelioid cell  
4 adenocarcinoma with cartilaginous and osseous metaplasia  
5 adenocarcinoma with cartilaginous metaplasia  
6 adenocarcinoma with osseous metaplasia  
7 mesenchymal chondrosarcoma  
8 necrotising sialometaplasia  
9 infiltrating basal cell carcinoma, sclerosing  
10 infiltrating basal cell carcinoma, non-sclerosing  
11 basal cell carcinoma, morpheic  
12 basal cell carcinoma, desmoplastic type  
13 adamantinoma of long bones  
14 hepatocellular carcinoma  
15 hepatoblastoma of liver  
16 primary angiosarcoma of liver  
17 apocrine adenocarcinoma  
18 giant cell tumour of bone  
19 osteoclastoma  
20 adenocarcinoma in adenomatous polyposis coli  
21 oncocytic carcinoma  
22 oncocytic adenocarcinoma  
23 hurthle cell carcinoma  
24 follicular carcinoma, oxyphilic cell  
25 clear cell meningioma  
26 chordoid meningioma  
27 angiomyxoma  
28 aggressive angiomyxoma  
29 ceruminous adenocarcinoma  
30 ceruminous carcinoma  
31 clear cell adenofibroma  
32 clear cell cystadenofibroma  
33 anaplastic carcinoma  
34 malignant malnutrition  
35 malignant granuloma of face  
36 lethal midline granuloma of face  
37 trichoepithelioma  
38 epithelioma adenoides cysticum  
39 brooke's tumour  
40 epithelioid sarcoma  
41 mixed adenocarcinoma and squamous cell carcinoma  
42 mixed adenocarcinoma and epidermoid carcinoma  
43 squamous cell carcinoma in situ  
44 epidermoid carcinoma in situ  
45 iec - intraepidermal carcinoma  
46 squamous cell carcinoma in situ, no icd-o subtype  
47 squamous cell carcinoma in situ, no international classification of diseases for oncology subtype  
48 embryonal sarcoma  
49 adenocarcinoma in situ in adenomatous polyp  
50 adenocarcinoma in situ in tubular adenoma

1 carcinoma in situ in adenomatous polyp  
2 adenocarcinoma in situ in polypoid adenoma  
3 carcinoma in situ in a polyp  
4 islet cell carcinoma  
5 islet cell adenocarcinoma  
6 pancreatic endocrine tumour, malignant  
7 pancreatic endocrine tumor, malignant  
8 endocrine adenomatosis  
9 adenoameloblastoma  
10 multicentric basal cell carcinoma  
11 hutchinson's melanotic freckle  
12 lentigo maligna  
13 hutchinson melanotic freckle  
14 [x] adverse react to antineoplastic/immunosuppress drugs nos  
15 mesothelioma, malignant  
16 malignant mesothelioma  
17 [x] adverse reaction to actinomycin d  
18 androblastoma  
19 arrhenoblastoma  
20 androblastoma, no icd-o subtype  
21 androblastoma, no international classification of diseases for oncology subtype  
22 mixed type rhabdomyosarcoma  
23 mixed embryonal rhabdomyosarcoma and alveolar rhabdomyosarcoma  
24 [x] adverse reaction to antineoplastic antibiotics  
25 [x] adverse reaction to antineoplastic antibiotics nos  
26 postmastectomy lymphangiosarcoma syndrome  
27 lymphangiosarcoma of stewart and treves  
28 lymphangiosarcoma of skin  
29 pigmented dermatofibrosarcoma protuberans  
30 bednar tumor  
31 bednar tumour  
32 cervical cancer screening refused  
33 malignant tertian malaria  
34 mt - malignant tertian malaria  
35 mtm - malignant tertian malaria  
36 nonencapsulated sclerosing carcinoma  
37 nonencapsulated sclerosing adenocarcinoma  
38 nonencapsulated sclerosing tumor  
39 papillary carcinoma, diffuse sclerosing  
40 nonencapsulated sclerosing tumour  
41 [x] adverse reaction to bleomycin  
42 [x] adverse reaction to busulfan  
43 [x] adverse reaction to carboplatin  
44 [x] adverse reaction to carmustine  
45 [x] adverse reaction to chlorambucil  
46 synovial sarcoma  
47 synovioma, malignant  
48 synovioma  
49 [x] adverse reaction to cisplatin  
50 lymphangiosarcoma

1 lymphangioendothelial sarcoma  
2 lymphangioendothelioma, malignant  
3 malignant lymphangioendothelioma  
4 [x] adverse reaction to cyclophosphamide  
5 [x] adverse reaction to cytarabine  
6 lipoblastomatosis  
7 lipoblastoma  
8 lipoblastoma and/or lipoblastomatosis  
9 spongioblastoma multiforme  
10 glm - glioblastoma multiforme  
11 gbm - glioblastoma multiforme  
12 glioblastoma, no icd-o subtype  
13 glioblastoma, no international classification of diseases for oncology subtype  
14 [x] adverse reaction to doxorubicin hydrochloride  
15 [x] adverse reaction to estramustine phosphate  
16 malignant ascites  
17 [x] adverse reaction to etoposide  
18 [x] adverse reaction to fluorouracil  
19 adnexal carcinoma  
20 spongioneuroblastoma  
21 nephrotic syndrome with pseudohermaphroditism  
22 drash syndrome  
23 squamous cell carcinoma, metastatic  
24 metastatic squamous cell carcinoma  
25 acquired renal cyst with neoplastic change  
26 acquired renal cyst without neoplastic change  
27 renal involvement in malignant disease  
28 [x] adverse reaction to hydroxyurea  
29 sclerosing stromal tumour  
30 intraductal papillary adenocarcinoma with invasion  
31 infiltrating and papillary adenocarcinoma  
32 infiltrating papillary adenocarcinoma  
33 [x] adverse reaction to lomustine  
34 [x] adverse reaction to melphalan  
35 turban tumour  
36 [x] adverse reaction to mercaptopurine  
37 [x] adverse reaction to methotrexate  
38 uterine fibroid - baby delivered  
39 uterine fibroid affecting obstetric care  
40 uterine fibroids in pregnancy, childbirth and the puerperium  
41 resection of heart tumour  
42 [x] adverse reaction to mitomycin  
43 [x] adverse reaction to mitozantrone  
44 [x] adverse reaction to mustine hydrochloride  
45 clark melanoma level 3  
46 periosteal fibrosarcoma  
47 periosteal sarcoma  
48 epithelioid mesothelioma, malignant  
49 epithelioid mesothelioma  
50 malignant teratoma, trophoblastic

1  
2 trophoblastic malignant teratoma  
3 polypoid squamous cell carcinoma  
4 [x] adverse reaction to plicamycin  
5 [x] adverse reaction to procarbazine  
6 [x] adverse reaction to rozoxane  
7 haemangioendothelioma  
8 angioendothelioma  
9 kaposiform hemangioendothelioma  
10 kaposiform haemangioendothelioma  
11 ecchondrosis  
12 synovial chondromatosis  
13 glucagonoma, malignant  
14 alpha cell tumor, malignant  
15 alpha cell tumour, malignant  
16 malignant alpha cell tumour  
17 malignant alpha cell tumor  
18 [x] adverse reaction to tioguanine  
19 [x] adverse reaction to thiotepa  
20 labial melanotic macule  
21 [x] adverse reaction to treosulfan  
22 [x] adverse reaction to vinblastine sulphate  
23 [x] adverse reaction to vincristine sulphate  
24 blue naevus, malignant  
25 blue nevus, malignant  
26 malignant blue naevus  
27 malignant blue nevus  
28 mucinous cystadenoma  
29 mucinous cystoma  
30 pseudomucinous cystadenoma  
31 [x]2ndry malignant neoplasm/bladder+oth+unsp urinary organs  
32 [x]2ndry malignant neoplasm/oth+unspec parts/nervous system  
33 [x]2ndry+unspcf malignant neoplasm lymph nodes/multi regions  
34 dedifferentiated liposarcoma  
35 dermatopolymyositis in neoplastic disease  
36 teratocarcinoma  
37 mixed embryonal carcinoma and teratoma  
38 adenocarcinoma with spindle cell metaplasia  
39 excision of tumour of bone  
40 polyp colon  
41 esthesioneuroepithelioma  
42 olfactory neuroepithelioma  
43 spitzoid malignant melanoma  
44 papillary mucinous cystadenocarcinoma  
45 papillary pseudomucinous cystadenocarcinoma  
46 papillary pseudomucinous adenocarcinoma  
47 meningothelial meningioma  
48 granular cell carcinoma  
49 granular cell adenocarcinoma  
50 myoepithelial tumour  
51 kupffer cell sarcoma

1 nevoid basal cell carcinoma syndrome  
2 basal cell carcinoma syndrome  
3 nbccs - nevoid basal cell carcinoma syndrome  
4 ganglioneuroblastoma  
5 [x]antineoplast antimetabs caus adverse eff in therap use  
6 [x]antineoplast natural prod caus adverse eff in therap use  
7 screening for malignant neoplasm of stomach  
8 screening for gastric malignant neoplasm  
9 screening for malignant neoplasm of urinary bladder  
10 bile duct adenocarcinoma  
11 cholangiocellular carcinoma  
12 polygonal cell carcinoma  
13 endometrial stromal sarcoma, high grade  
14 endometrial sarcoma  
15 endometrioid stromal sarcoma, high grade  
16 curettage of tumour of bone nec  
17 excision of tumour of bone nec  
18 phyllodes tumour, borderline  
19 phyllodes tumor  
20 phyllodes tumor, borderline  
21 epithelioma, malignant  
22 epithelioma  
23 malignant epithelioma  
24 curettage of tumour of bone and graft hfq  
25 fibrillary astrocytoma  
26 fibrous astrocytoma  
27 sex cord-stromal tumour  
28 sex cord-stromal tumor  
29 sex cord tumor  
30 gonadal stromal tumor  
31 testicular stromal tumor  
32 ovarian stromal tumor  
33 testicular stromal tumour  
34 ovarian stromal tumour  
35 sex cord tumour  
36 gonadal stromal tumour  
37 sex cord-stromal tumour, no icd-o subtype  
38 sex cord-stromal tumor, no icd-o subtype  
39 sex cord-stromal tumor, no international classification of diseases for oncology subtype  
40 paget's disease, extramammary (except paget's disease of bone)  
41 paget disease, extramammary (except paget disease of bone)  
42 carcinomatous myopathic syndrome  
43 myopathy associated with malignant disease  
44 follicular adenocarcinoma, trabecular  
45 follicular carcinoma, trabecular  
46 follicular adenocarcinoma, moderately differentiated  
47 follicular carcinoma, moderately differentiated  
48 follicular carcinoma - moderately differentiated  
49 follicular carcinoma - trabecular  
50 follicular adenocarcinoma - moderately differentiated



1 sex cord tumour with annular tubules  
2 sex cord tumor with annular tubules  
3 mucous carcinoma  
4 mucinous carcinoma  
5 colloid adenocarcinoma  
6 colloid carcinoma  
7 gelatinous adenocarcinoma  
8 gelatinous carcinoma  
9 mucoid adenocarcinoma  
10 mucoid carcinoma  
11 mucous adenocarcinoma  
12 pseudomyxoma peritonei with unknown primary site  
13 gangliocytic paraganglioma  
14 seminoma, anaplastic  
15 seminoma with high mitotic index  
16 anaplastic seminoma  
17 tumourlet  
18 tumorlet  
19 giant cell and spindle cell carcinoma  
20 lymphangioliomyomatosis  
21 small cell sarcoma  
22 round cell sarcoma  
23 undifferentiated round cell sarcoma  
24 peripheral neuroectodermal tumor  
25 neuroectodermal tumor  
26 peripheral primitive neuroectodermal tumor  
27 ppnet  
28 neuroectodermal tumour  
29 peripheral primitive neuroectodermal tumour  
30 myofibromatosis  
31 congenital generalized fibromatosis  
32 infantile myofibromatosis  
33 congenital generalised fibromatosis  
34 [x]carcinoma in situ of oth+unspecified male genital organs  
35 [x]carcinoma in situ of other+unspcfd female genital organs  
36 [x]carcinoma in situ of other+unspecified urinary organs  
37 [x]carcinoma in situ of skin of other+unspecified parts/face  
38 gemistocytoma  
39 small cell carcinoma, fusiform cell  
40 small cell carcinoma - fusiform cell  
41 clark melanoma level 4  
42 chondroblastoma, malignant  
43 malignant chondroblastoma  
44 glycogen-rich carcinoma  
45 glycogen-rich clear cell carcinoma  
46 reserve cell carcinoma  
47 round cell carcinoma  
48 scc - small cell carcinoma  
49 endodermal sinus tumor  
50 yolk sac tumor

1 polyvesicular vitelline tumor  
2 orchioblastoma  
3 embryonal carcinoma, infantile  
4 yolk sac tumour  
5 hepatoid yolk sac tumor  
6 polyvesicular vitelline tumour  
7 hepatoid yolk sac tumour  
8 infantile embryonal carcinoma  
9 glioma, malignant, no icd-o subtype  
10 glioma  
11 glioma (except nasal glioma, not neoplastic)  
12 gonocytoma  
13 gby - gonadoblastoma  
14 apudoma  
15 smooth muscle tumor  
16 leiomyomatosis  
17 intravascular leiomyomatosis  
18 leiomyomatosis, no icd-o subtype  
19 leiomyomatosis, no international classification of diseases for oncology subtype  
20 intravenous leiomyomatosis  
21 placental site trophoblastic tumour  
22 placental site trophoblastic tumor  
23 malignant melanoma in giant pigmented naevus  
24 malignant melanoma in giant pigmented nevus  
25 malignant melanoma in congenital melanocytic nevus  
26 malignant melanoma in congenital melanocytic naevus  
27 endometrioid adenoma, borderline malignancy  
28 endometrioid cystadenoma, borderline malignancy  
29 endometrioid tumor of low malignant potential  
30 endometrioid tumour of low malignant potential  
31 atypical proliferative endometrioid tumor  
32 atypical proliferative endometrioid tumour  
33 endometrioid adenoma - borderline malignancy  
34 endometrioid cystadenoma - borderline malignancy  
35 endometrioid tumour, borderline  
36 endometrioid tumor, borderline  
37 aesthesioneuroblastoma  
38 esthesioneuroblastoma  
39 chondroblastic osteosarcoma  
40 nesidioblastoma  
41 dermatofibrosarcoma protuberans  
42 dermatofibrosarcoma, no international classification of diseases for oncology subtype  
43 dermatofibrosarcoma, no icd-o subtype  
44 ewing's tumor  
45 ewing's tumour  
46 ewing sarcoma  
47 brown fat tumour  
48 juvenile granulosa cell tumour  
49 juvenile granulosa cell tumor  
50 lobular carcinoma, noninfiltrating

1  
2 lcis  
3 non-infiltrating lobular carcinoma  
4 lcis - lobular carcinoma in situ  
5 neurilemoma, malignant  
6 neurilemmoma, malignant  
7 neurilemmosarcoma  
8 malignant schwannoma  
9 pleomorphic rhabdomyosarcoma  
10 pleomorphic rhabdomyosarcoma, adult type  
11 carcinomatous peripheral neuropathy  
12 carcinomatous neuropathy  
13 paraneoplastic polyneuropathy  
14 leydig cell tumour, malignant  
15 leydig cell tumor, malignant  
16 interstitial cell tumor, malignant  
17 interstitial cell tumour, malignant  
18 malignant interstitial cell tumour  
19 malignant interstitial cell tumor  
20 malignant leydig cell tumor  
21 [m]papillary neoplasms  
22 [x]dermato(poly)myositis in neoplastic disease ce  
23 [m]ovarian papillary tumour  
24 [m]ovarian serous tumour  
25 [m]testicular stromal tumour  
26 [m]ovarian stromal tumour  
27 [m]fibroxanthosarcoma  
28 [m]sympathogonioma  
29 [m]sympathicogonioma  
30 comedocarcinoma, noninfiltrating  
31 ductal carcinoma in situ, comedo type  
32 dcis, comedo type  
33 non-infiltrating comedocarcinoma  
34 meningioma, malignant  
35 leptomeningeal sarcoma  
36 meningeal sarcoma  
37 meningothelial sarcoma  
38 meningioma, anaplastic  
39 sebaceous epithelioma  
40 telangiectatic osteosarcoma  
41 ayala's disease  
42 pleomorphic xanthoastrocytoma  
43 tumour staging  
44 tnm tumour staging  
45 figo staging of gynaecological malignancy  
46 pseudomucinous adenocarcinoma  
47 pseudomucinous cystadenocarcinoma  
48 mixed parotid tumour  
49 insertion of carmustine wafers in cerebral neoplasm  
50 secondary carcinoma  
51 secondary neoplasm  
52  
53  
54  
55  
56  
57  
58  
59  
60

1 carcinoma of rectum  
2 rectal carcinoma  
3 squamous cell carcinoma of skin  
4 multiple self-healing epithelioma of ferguson-smith  
5 rodent ulcer  
6 prostatic intraepithelial neoplasia  
7 malignant tumour of unknown origin  
8 carcinoma of genitourinary organ  
9 sarcoma of bone and connective tissue  
10 carcinoma of bone, connective tissue, skin and breast  
11 carcinoma of lip, oral cavity and pharynx  
12 carcinoma of respiratory tract and intrathoracic organs  
13 carcinoma of caecum  
14 anal carcinoma  
15 carcinoma common bile duct  
16 malignant neoplasm of carpal bones  
17 malignant neoplasm of metacarpal bones  
18 seminoma of testis  
19 secondary carcinoma of respiratory and/or digestive systems  
20 oligodendroblastoma  
21 secondary carcinoma of other specified sites  
22 carcinoma of other and unspecified sites  
23 carcinoma in situ of ear  
24 sertoli cell carcinoma  
25 water-clear cell adenocarcinoma  
26 water-clear cell carcinoma  
27 hemangioblastoma  
28 angioblastoma  
29 superficial spreading adenocarcinoma  
30 typical carcinoid  
31 carcinoid tumor  
32 carcinoid tumour no icd-o subtype  
33 carcinoid tumor no icd-o subtype  
34 carcinoid  
35 carcinoid tumor no international classification of diseases for oncology subtype  
36 neurofibromatosis  
37 multiple neurofibromatosis  
38 von recklinghausen's disease (except of bone)  
39 recklinghausen's disease (except of bone)  
40 solid carcinoma  
41 solid carcinoma with mucin formation  
42 solid adenocarcinoma with mucin formation  
43 giant cell tumour of soft parts  
44 giant cell tumor of soft parts  
45 giant cell tumour of soft tissue  
46 giant cell tumor of soft tissue  
47 malignant tumour, small cell type  
48 malignant tumor, small cell type  
49 malignant tumor - small cell type  
50 paget disease and infiltrating duct carcinoma of breast

1 infiltrating duct adenocarcinoma  
2 duct cell carcinoma  
3 ductal carcinoma  
4 duct adenocarcinoma  
5 invasive breast carcinoma of no special type  
6 calcifying epithelial odontogenic tumour  
7 pindborg tumour  
8 ceot - calcifying epithelial odontogenic tumour  
9 malignant rhabdoid tumour  
10 rhabdoid sarcoma  
11 rhabdoid tumor  
12 malignant rhabdoid tumor  
13 rhabdoid tumour  
14 melanotic medulloblastoma  
15 mdb - medulloblastoma  
16 medulloblastoma, no icd-o subtype  
17 medulloblastoma, no international classification of diseases for oncology subtype  
18 neoplastic pleural effusion  
19 malignant effusion  
20 pleural effusion due to malignancy  
21 malignant teratoma, undifferentiated  
22 malignant teratoma, anaplastic  
23 malignant teratoma - anaplastic  
24 acinar cell tumour  
25 acinic cell tumor  
26 acinic cell tumour  
27 chondromatosis  
28 cartilage analogue of fibromatosis  
29 cartilage analog of fibromatosis  
30 malignant tumour, giant cell type  
31 malignant tumor, giant cell type  
32 malignant tumour - giant cell type  
33 malignant tumor - giant cell type  
34 [x]follow-up examinat after other treatment for malig neopl  
35 [x]follow-up examinat after unspec treatment for malig neop  
36 mullerian mixed tumor  
37 malignant mixed mullerian tumor  
38 malignant mixed mullerian tumour  
39 [x]fracture of bone in neoplastic diseases ce  
40 cloacogenic carcinoma  
41 haemangiopericytoma, malignant  
42 hemangiopericytoma, malignant  
43 malignant haemangiopericytoma  
44 malignant hemangiopericytoma  
45 [x]glomerular disorders in neoplastic diseases ce  
46 intraepidermal squamous cell carcinoma, bowen's type  
47 bd - bowen's disease  
48 scc - intraepidermal squamous cell carcinoma - bowen's type  
49 bowen disease  
50 [x]hiv dis reslt/oth mal neopl/lymph,h'matopoetc+reltd tissu

1 phaeochromocytoma  
2 pheochromocytoma  
3 chromaffin paraganglioma  
4 chromaffin tumor  
5 chromaffinoma  
6 adrenal medullary paraganglioma  
7 chromaffin tumour  
8 adenoid squamous cell carcinoma  
9 pseudoglandular squamous cell carcinoma  
10 squamous cell carcinoma, acantholytic  
11 acantholytic squamous cell carcinoma  
12 neoplasm, malignant (primary)  
13 neoplasm, malignant  
14 blastoma  
15 malignancy  
16 cancer  
17 unclassified tumor, malignant  
18 tumour, malignant  
19 tumor, malignant  
20 unclassified tumour, malignant  
21 malignant neoplasm  
22 malignant tumour morphology  
23 malignant tumor morphology  
24 cancer morphology  
25 malignant neoplasm, primary  
26 unclassified tumor, borderline malignancy  
27 tumor, borderline malignancy  
28 tumour, borderline malignancy  
29 unclassified tumour, borderline malignancy  
30 adenocarcinoid tumor  
31 cystic mesothelioma  
32 intraductal carcinoma, noninfiltrating  
33 intraductal adenocarcinoma, noninfiltrating  
34 intraductal carcinoma  
35 ductal intraepithelial neoplasia 3  
36 ductal carcinoma in situ  
37 din 3  
38 dcis  
39 non-infiltrating intraductal carcinoma  
40 non-infiltrating intraductal adenocarcinoma  
41 intraductal carcinoma, noninfiltrating, no icd-o subtype  
42 intraductal carcinoma, noninfiltrating, no international classification of diseases for oncology subtype  
43 sympathicoblastoma  
44 central neuroblastoma  
45 nb - neuroblastoma  
46 signet ring cell adenocarcinoma  
47 giant cell sarcoma (except of bone, m-92503)  
48 undifferentiated pleomorphic cell sarcoma  
49 juvenile melanoma  
50 juvenila melanoma

1  
2 alveolar soft part sarcoma  
3 choroid plexus carcinoma  
4 ameloblastoma, malignant  
5 adamantinoma, malignant (except of tibia and long bones, m-92613)  
6 malignant adamantinoma  
7 tumour cells, malignant  
8 tumor cells, malignant  
9 malignant tumor cells  
10 teratoid medulloepithelioma  
11 malignant tumour, fusiform cell type  
12 malignant tumor, fusiform cell type  
13 malignant tumor, spindle cell type  
14 malignant tumour, spindle cell type  
15 malignant tumour - fusiform cell type  
16 malignant tumour - spindle cell type  
17 malignant tumor - spindle cell type  
18 malignant tumor - fusiform cell type  
19 pineocytoma  
20 hurthle cell tumour  
21 mesenchymoma, malignant  
22 mixed mesenchymal sarcoma  
23 malignant mesenchymoma  
24 lobular adenocarcinoma  
25 infiltrating lobular carcinoma  
26 mast cell tumor  
27 mast cell tumour  
28 [x]mal neoplasm/connective+soft tissue of trunk,unspecified  
29 ganglioglioma, no icd-o subtype  
30 glioneuroma  
31 neuroastrocytoma  
32 ganglioglioma, no international classification of diseases for oncology subtype  
33 [x]mal neoplasm/overlap les/periph nerv+autonomic nerv system  
34 [x]mal neoplasm/overlap lesion/bone+articular cartilage/limb  
35 [x]mal neoplasm/periph nerves+autonomic nervous system,unspc  
36 verrucous squamous cell carcinoma  
37 verrucous epidermoid carcinoma  
38 warty carcinoma  
39 condylomatous carcinoma  
40 [x]malig neopl, overlap lesion brain & other part of cns  
41 scc - verrucous squamous cell carcinoma  
42 [x]malignant melanoma of other+unspecified parts of face  
43 [x]malignant neopl/overlapping les/resp+intrathoracic organs  
44 [x]malignant neoplasm of eye, brain and other parts of cent  
45 [x]malignant neoplasm of ill-defined, secondary and unspeci  
46 brenner tumour, borderline malignancy  
47 brenner tumor, borderline malignancy  
48 brenner tumor, proliferating  
49 brenner tumour, proliferating  
50 brenner tumour - borderline malignancy  
51 proliferating brenner tumour

1 [x]malignant neoplasm of lip, oral cavity and pharynx  
2 proliferating brenner tumor  
3 brenner tumor - borderline malignancy  
4 borderline brenner tumour  
5 brenner tumour, atypical proliferative  
6 borderline brenner tumor  
7 brenner tumor, atypical proliferative  
8 [x]malignant neoplasm of respiratory and intrathoracic orga  
9 [x]malignant neoplasm-pluriglandular involvement,unspecified  
10 [x]malignant neoplasm/bone+articular cartilage, unspecified  
11 [x]malignant neoplasm/bones+articular cartilage/limb,unspfd  
12 [x]malignant neoplasm/central nervous system, unspecified  
13 [x]malignant neoplasm/connective + soft tissue,unspecified  
14 [x]malignant neoplasm/ill-defined sites within resp system  
15 [x]malignant neoplasm/other and unspecified cranial nerves  
16 [x]malignant neoplasm/other specified female genital organs  
17 [x]malignant neoplasm/other specified male genital organs  
18 [x]malignant neoplasm/overlap lesion/bone+articulr cartilage  
19 [x]malignant neoplasm/overlap lesion/heart,mediastinm+pleura  
20 [x]malignant neoplasm/overlap lesion/other+ill-defined sites  
21 [x]malignant neoplasm/overlapping lesion/feml genital organs  
22 [x]malignant neoplasm/overlapping lesion/male genital organs  
23 [x]malignant neoplasm/peripheral nerves of trunk,unspecified  
24 [x]malignant neoplasm/upper resp tract, part unspecified  
25 [x]malignant neoplasms/independent (primary) multiple sites  
26 [x]malignant neoplasms/independent(primary)multiple sites  
27 [x]malignant neoplsm/ill-defin sites within digestive system  
28 papillary serous cystadenocarcinoma  
29 papillary serous adenocarcinoma  
30 micropapillary serous carcinoma  
31 serous adenocarcinoma  
32 serous carcinoma  
33 [x]mesothelioma of lung  
34 tumour of uterine body affecting obstetric care  
35 tumour of uterine body - baby delivered  
36 monoclonal paraproteinaemia  
37 [x]multiple cranial nerve palsies/neoplastic disease ce  
38 glaucoma due to ocular tumour or cyst  
39 [x]neo/uncertn+unkwn behav/lymph,h'matopetc+rel tiss,unspcf  
40 [x]neoplasm of uncert/unkn behav female genit organs, unspec  
41 [x]nerve root+plexus compressions in neoplastic disease ce  
42 familial vestibular schwannoma  
43 ampullary carcinoma in situ  
44 cancer in situ of anal canal  
45 carcinoma in situ of biliary tract  
46 cancer in situ of urinary bladder  
47 cancer in situ of body of stomach  
48 carcinoma in situ of gastric body  
49 carcinoma in situ of corpus uteri  
50 carcinoma in situ of buccal mucosa



1 carcinoma in situ of cheek mucosa  
2 carcinoma in situ of internal cheek  
3 carcinoma in situ of cecum  
4 carcinoma in situ of cardia  
5 carcinoma in situ of gastric cardia  
6 cancer in situ of cardia of stomach  
7 carcinoma in situ of cervix uteri  
8 cin 3 - cervical intraepithelial neoplasia grade 3  
9 cancer in situ of colon  
10 carcinoma in situ of distal extra hepatic duct  
11 cancer in situ of common bile duct  
12 cancer in situ of cystic duct  
13 cancer in situ of duodenum  
14 carcinoma in situ of esophagus  
15 cancer in situ of esophagus  
16 cancer in situ of oesophagus  
17 carcinoma in situ of ethmoid sinus  
18 cancer in situ of eye  
19 carcinoma in situ of female genital organ  
20 fom - carcinoma in situ of floor of mouth  
21 cancer in situ fundus of stomach  
22 cancer in situ of gastrointestinal tract  
23 carcinoma in situ of gum  
24 carcinoma in situ of gingiva  
25 cancer in situ of gum  
26 carcinoma in situ of hepatic flexure  
27 carcinoma in situ of laryngopharynx  
28 cancer in situ of hypopharynx  
29 cancer in situ of ileum  
30 cancer in situ of jejunum  
31 cancer in situ of larynx  
32 carcinoma in situ of lower third of oesophagus  
33 carcinoma in situ of lower third of esophagus  
34 carcinoma in situ of lower 1/3 esophagus  
35 carcinoma in situ of male genital organ  
36 carcinoma in situ of maxillary antrum  
37 carcinoma in situ of meckel diverticulum  
38 carcinoma in situ of middle third of oesophagus  
39 carcinoma in situ of middle third of esophagus  
40 carcinoma in situ of middle 1/3 esophagus  
41 carcinoma in situ of mouth  
42 cancer in situ of mouth  
43 carcinoma in situ of nasopharyngeal wall  
44 pns - carcinoma in situ of postnasal space  
45 carcinoma in situ of epipharynx  
46 carcinoma in situ of postnasal space  
47 carcinoma situ of oropharynx  
48 carcinoma in situ of mesopharynx  
49 cancer in situ of oropharynx  
50 carcinoma in situ of roof of mouth  
51  
52  
53  
54  
55  
56  
57  
58  
59  
60

1 cancer in situ of pancreas  
2 cancer in situ of penis  
3 cancer in situ of pharynx  
4 cancer in situ of prostate  
5 carcinoma in situ of pylorus  
6 cancer in situ of pylorus  
7 cancer in situ of rectum  
8 carcinoma in situ of skin of face  
9 cancer in situ of skin of face  
10 carcinoma in situ of skin of forehead  
11 cancer in situ skin of lip  
12 carcinoma in situ of skin of lower limb  
13 cancer in situ skin of neck  
14 cancer in situ of skin  
15 carcinoma in situ of sphenoid sinus  
16 congenital sternomastoid torticollis  
17 congenital wry neck  
18 cancer in situ of spleen  
19 carcinoma in situ of thyroid gland  
20 cancer in situ of thyroid  
21 cancer in situ of tongue  
22 severe epithelial dysplasia of trachea  
23 carcinoma in situ of upper third of oesophagus  
24 carcinoma in situ of upper third esophagus  
25 carcinoma in situ of upper third oesophagus  
26 carcinoma in situ of upper third of esophagus  
27 carcinoma in situ of upper 1/3 esophagus  
28 vain - vaginal intraepithelial neoplasia 3  
29 vain iii - vaginal intraepithelial neoplasia grade iii  
30 cancer in situ of vagina  
31 cancer in situ of vulva  
32 other neoplasm screening  
33 malignant melanoma of skin of cheek  
34 malignant melanoma of skin of eyebrow  
35 malignant melanoma of skin of nose  
36 mm - malignant melanoma of skin  
37 cutaneous malignant melanoma  
38 melanoma of skin  
39 primary malignant neoplasm of acromion  
40 primary malignant neoplasm of aortic body  
41 primary malignant neoplasm of areola of female breast  
42 primary malignant neoplasm of areola of male breast  
43 primary malignant neoplasm of broad ligament  
44 primary malignant neoplasm of clavicle  
45 primary malignant neoplasm of coccygeal body  
46 primary malignant neoplasm of common bile duct  
47 primary malignant neoplasm of cuboid  
48 primary malignant neoplasm of cystic duct  
49 primary malignant neoplasm of diaphragm  
50 primary malignant neoplasm of endocervix

1 cancer of endocervix  
2  
3 primary malignant neoplasm of epicardium  
4 primary malignant neoplasm of ethmoid bone  
5 primary malignant neoplasm of exocervix  
6 primary malignant neoplasm of femur  
7 primary malignant neoplasm of fibula  
8 primary malignant neoplasm of frontal bone  
9 primary malignant neoplasm of glomus jugulare  
10 primary malignant neoplasm of great vessels  
11 primary malignant neoplasm of hilus of lung  
12 primary malignant neoplasm of ilium  
13 primary malignant neoplasm of intrathoracic organs  
14 primary malignant neoplasm of ischium  
15 primary malignant neoplasm of kidney  
16 ca - liver cancer  
17 liver cancer  
18 malignant tumor of liver  
19 malignant tumour of liver  
20 primary malignant neoplasm of male breast  
21 primary malignant neoplasm of maxilla  
22 primary malignant neoplasm of nasal bone  
23 primary malignant neoplasm of nipple of female breast  
24 primary malignant neoplasm of nipple of male breast  
25 primary malignant neoplasm of occipital bone  
26 primary malignant neoplasm of paraganglion  
27 primary malignant neoplasm of parietal bone  
28 primary malignant neoplasm of parietal peritoneum  
29 primary malignant neoplasm of patella  
30 primary malignant neoplasm of periadrenal tissue  
31 primary malignant neoplasm of perianal skin  
32 primary malignant neoplasm of pericardium  
33 primary malignant neoplasm of presacral region  
34 primary malignant neoplasm of pubis  
35 primary malignant neoplasm of radius  
36 primary malignant neoplasm of rectum  
37 primary malignant neoplasm of respiratory tract  
38 primary malignant neoplasm of rib  
39 primary malignant neoplasm of sacrococcygeal region  
40 primary malignant neoplasm of scapula  
41 primary malignant neoplasm of sebaceous gland  
42 primary malignant neoplasm of skin of ankle  
43 primary malignant neoplasm of skin of back  
44 primary malignant neoplasm of skin of breast  
45 primary malignant neoplasm of skin of buttock  
46 primary malignant neoplasm of skin of chin  
47 primary malignant neoplasm of skin of eyebrow  
48 primary malignant neoplasm of skin of finger  
49 primary malignant neoplasm of skin of foot  
50 primary malignant neoplasm of skin of forehead  
51 primary malignant neoplasm of skin of groin

1 primary malignant neoplasm of skin of hand  
2 primary malignant neoplasm of skin of hip  
3 primary malignant neoplasm of skin of knee  
4 primary malignant neoplasm of skin of lip  
5 primary malignant neoplasm of skin of neck  
6 primary malignant neoplasm of skin of perineum  
7 primary malignant neoplasm of skin of shoulder  
8 primary malignant neoplasm of skin of thigh  
9 primary malignant neoplasm of skin of toe  
10 primary malignant neoplasm of skin of umbilicus  
11 primary malignant neoplasm of sphenoid bone  
12 primary malignant neoplasm of sternum  
13 primary malignant neoplasm of sweat gland  
14 primary malignant neoplasm of talus  
15 primary malignant neoplasm of temporal bone  
16 primary malignant neoplasm of tibia  
17 primary malignant neoplasm of ulna  
18 primary malignant neoplasm of ventral surface of tongue  
19 primary malignant neoplasm of vomer  
20 primary malignant neoplasm of zygomatic bone  
21 metastatic malignant neoplasm to adrenal gland  
22 suprarenal metastasis  
23 metastasis to adrenal gland  
24 cancer metastatic to adrenal gland  
25 metastatic malignant neoplasm to axillary lymph nodes  
26 metastatic malignant neoplasm to bladder  
27 metastasis to bladder  
28 metastatic tumour to bladder  
29 metastatic tumor to bladder  
30 cancer metastatic to urinary bladder  
31 secondary malignant neoplasm of bone  
32 metastatic malignant neoplasm to bone  
33 metastatic tumour of bone  
34 metastatic tumor of bone  
35 secondary cancer of bone  
36 osseous metastasis  
37 bony metastasis  
38 cancer metastatic to bone  
39 tumour metastatic to bone  
40 tumor metastatic to bone  
41 metastatic malignant neoplasm to brain  
42 secondary cancer of brain  
43 metastasis to brain  
44 cancer metastatic to brain  
45 secondary malignant neoplasm of bronchopulmonary lymph nodes  
46 metastatic malignant neoplasm to bronchopulmonary lymph nodes  
47 metastatic malignant neoplasm to hilar lymph nodes  
48 secondary malignant neoplasm of hilar lymph nodes  
49 secondary malignant neoplasm of cerebrum  
50 metastatic malignant neoplasm to cerebrum

1 metastatic malignant neoplasm to colon  
2 metastatic malignant neoplasm to duodenum  
3 cancer metastatic to duodenum  
4 secondary malignant neoplasm of female breast  
5 metastatic malignant neoplasm to female breast  
6 secondary malignant deposit to breast  
7 metastasis to breast  
8 metastatic malignant neoplasm to gastrointestinal tract  
9 metastasis to gastrointestinal tract  
10 secondary ca gastrointestinal tract  
11 metastatic malignant neoplasm to ileum  
12 secondary malignant neoplasm of iliac lymph nodes  
13 metastatic malignant neoplasm to iliac lymph nodes  
14 cancer metastatic to iliac lymph nodes  
15 secondary malignant neoplasm of infraclavicular lymph nodes  
16 metastatic malignant neoplasm to infraclavicular lymph nodes  
17 secondary malignant neoplasm of intercostal lymph nodes  
18 metastatic malignant neoplasm to intercostal lymph nodes  
19 cancer metastatic to intercostal lymph nodes  
20 secondary malignant neoplasm of intra-abdominal lymph nodes  
21 metastatic malignant neoplasm to intra-abdominal lymph nodes  
22 cancer metastatic to intra-abdominal lymph nodes  
23 secondary malignant neoplasm of intrapelvic lymph nodes  
24 metastatic malignant neoplasm to intrapelvic lymph nodes  
25 cancer metastatic to intrapelvic lymph nodes  
26 secondary malignant neoplasm of intrathoracic lymph nodes  
27 metastatic malignant neoplasm to intrathoracic lymph nodes  
28 cancer metastatic to intrathoracic lymph nodes  
29 metastatic malignant neoplasm to jejunum  
30 metastatic malignant neoplasm to kidney  
31 metastatic tumour in kidney  
32 metastatic tumor in kidney  
33 metastasis to renal parenchyma  
34 secondary renal cancer  
35 renal metastasis  
36 secondary cancer of kidney  
37 cancer metastatic to kidney  
38 secondary malignant neoplasm of large intestine  
39 metastatic malignant neoplasm to large intestine  
40 metastasis to large intestine  
41 cancer metastatic to large intestine  
42 metastatic malignant neoplasm to liver  
43 liver secondary cancer  
44 liver secondaries  
45 secondary malignancy of liver  
46 hepatic metastasis  
47 cancer metastatic to liver  
48 metastatic malignant neoplasm to lung  
49 secondary malignant tumour of lung  
50 secondary malignant tumor of lung

1 pulmonary metastasis  
2 secondary cancer of lung  
3 cancer metastatic to lung  
4 metastatic malignant neoplasm to lymph node  
5 secondary lymph node cancer  
6 cancer metastatic to lymph nodes  
7 secondary malignant neoplasm of lymph nodes of face  
8 metastatic malignant neoplasm to lymph nodes of face  
9 cancer metastatic to lymph nodes of face  
10 secondary malignant neoplasm of lymph nodes of lower limb  
11 metastatic malignant neoplasm to lymph nodes of lower limb  
12 metastasis to lower limb lymph node  
13 cancer metastatic to lymph nodes of lower limb  
14 secondary malignant neoplasm of lymph nodes of multiple sites  
15 metastatic malignant neoplasm to lymph nodes of multiple sites  
16 cancer metastatic to lymph nodes of multiple sites  
17 metastatic malignant neoplasm to lymph nodes of upper limb  
18 metastasis to upper limb lymph node  
19 cancer metastatic to lymph nodes of upper limb  
20 metastatic malignant neoplasm to mediastinal lymph nodes  
21 metastatic malignant neoplasm to mediastinum  
22 secondary malignant tumour of mediastinum  
23 secondary malignant tumor of mediastinum  
24 metastasis to mediastinum  
25 mediastinal metastasis  
26 cancer metastatic to mediastinum  
27 metastatic malignant neoplasm to mesenteric lymph nodes  
28 cancer metastatic to mesenteric lymph nodes  
29 secondary malignant neoplasm of nervous system  
30 metastatic malignant neoplasm to nervous system  
31 metastasis to nervous system  
32 cancer metastatic to nervous system  
33 metastatic malignant neoplasm to obturator lymph nodes  
34 cancer metastatic to obturator lymph nodes  
35 secondary malignant neoplasm of occipital lymph nodes  
36 metastatic malignant neoplasm to occipital lymph nodes  
37 malignant neoplasm of digestive organs and peritoneum  
38 malignant neoplasm of oesophagus nos  
39 malignant neoplasm of colon nos  
40 metastatic malignant neoplasm to ovary  
41 krukentburg tumor  
42 secondary tumor to ovary  
43 ovarian metastasis  
44 malignant neoplasm of upper lobe, bronchus or lung  
45 metastasis to ovary  
46 malignant neoplasm of bronchus or lung nos  
47 secondary cancer of ovary  
48 secondary tumour to ovary  
49 malignant neoplasm of bone and articular cartilage  
50 krukentburg tumour

1 cancer metastatic to ovary  
2 malignant neoplasm of hand bones  
3 malignant neoplasm of short bones of leg  
4 other malignant neoplasm of skin  
5 malignant neoplasm of vulva unspecified  
6 malignant neoplasm of testis nos  
7 disseminated malignancy nos  
8 carcinoma in situ of other and unspecified parts of uterus  
9 secondary malignant neoplasm of parotid lymph nodes  
10 metastatic malignant neoplasm to parotid lymph nodes  
11 secondary malignant neoplasm of pectoral axillary lymph nodes  
12 metastatic malignant neoplasm to pectoral axillary lymph nodes  
13 metastatic malignant neoplasm to penis  
14 [m]adenomatous and adenocarcinomatous polyps of colon  
15 metastatic tumour to penis  
16 [m]ovarian cystic, mucinous and serous neoplasms  
17 metastatic tumor to penis  
18 [m]malignant melanoma nos  
19 metastasis to penis  
20 [m]osteomas and osteosarcomas  
21 [m]glioblastoma nos  
22 [m]neuroblastoma nos  
23 [m]lymphogranuloma, malignant  
24 [x]mesothelioma of other sites  
25 carcinoma of lip  
26 metastatic malignant neoplasm to pleura  
27 secondary malignant tumour of pleura  
28 secondary malignant tumor of pleura  
29 pleural seedling  
30 metastasis to pleura  
31 cancer metastatic to pleura  
32 metastatic malignant neoplasm to popliteal lymph nodes  
33 cancer metastatic to popliteal lymph nodes  
34 metastatic malignant neoplasm to prostate  
35 metastatic tumour to prostate  
36 metastatic tumor to prostate  
37 metastasis to prostate  
38 cancer metastatic to prostate  
39 metastatic malignant neoplasm to rectum  
40 cancer metastatic to rectum  
41 metastatic malignant neoplasm to respiratory tract  
42 cancer metastatic to respiratory tract  
43 metastatic malignant neoplasm to skin of breast  
44 metastatic malignant neoplasm to skin of face  
45 metastatic malignant neoplasm to skin of neck  
46 metastatic malignant neoplasm to skin of trunk  
47 metastatic malignant neoplasm to skin  
48 dermal metastasis  
49 cutaneous metastasis  
50 malignant infiltration of skin

1 skin secondaries  
2 secondary cancer of skin  
3 metastasis to skin  
4 cancer metastatic to skin  
5 metastatic malignant neoplasm to small intestine  
6 metastasis to small intestine  
7 cancer metastatic to small intestine  
8 secondary malignant neoplasm of spinal cord  
9 metastatic malignant neoplasm to spinal cord  
10 secondary malignant neoplasm of submandibular lymph nodes  
11 metastatic malignant neoplasm to submandibular lymph nodes  
12 secondary malignant neoplasm of submental lymph nodes  
13 metastatic malignant neoplasm to submental lymph nodes  
14 secondary malignant neoplasm of superficial inguinal lymph nodes  
15 metastatic malignant neoplasm to superficial inguinal lymph nodes  
16 metastatic malignant neoplasm to testis  
17 metastatic tumour to testis  
18 metastatic tumor to testis  
19 metastasis to testis  
20 metastasis to peritoneum  
21 peritoneal seedling  
22 secondary malignant peritoneal deposit  
23 cancer metastatic to peritoneum  
24 metastatic malignant neoplasm to peritoneum  
25 secondary malignant neoplasm of the retroperitoneum  
26 metastatic malignant neoplasm to the retroperitoneum  
27 metastasis to retroperitoneum  
28 retroperitoneal metastasis  
29 metastatic malignant neoplasm to tongue  
30 secondary malignant neoplasm of tracheobronchial lymph nodes  
31 metastatic malignant neoplasm to tracheobronchial lymph nodes  
32 cancer metastatic to tracheobronchial lymph nodes  
33 metastatic malignant neoplasm to ureter  
34 metastatic tumour to ureter  
35 metastatic tumor to ureter  
36 metastasis to ureter  
37 metastatic malignant neoplasm to urethra  
38 metastatic tumour to urethra  
39 metastatic tumor to urethra  
40 metastasis to urethra  
41 metastatic malignant neoplasm to urinary system  
42 metastasis to urinary tract  
43 cancer metastatic to urinary tract  
44 metastatic malignant neoplasm to uterus  
45 metastasis to uterus  
46 cancer metastatic to uterus  
47 metastatic malignant neoplasm to vagina  
48 secondary tumour to vagina  
49 secondary tumor to vagina  
50 metastasis to vagina



1 cancer metastatic to vagina  
2 metastatic malignant neoplasm to vulva  
3 cancer metastatic to vulva  
4 tumour of false cord  
5 tumor of false cord  
6 [x]oth malignant neoplasm/skin of oth+unspecfd parts of face  
7 [x]oth spcf neo/uncrt+unkwn behav/lymph,h'matopetic+rel tis  
8 tumour of vocal cord  
9 tumor of vocal cord  
10 [x]oth systemic atrophy affecting cns in neoplastic disease ce  
11 malignant neoplasm of lip, oral cavity and pharynx  
12 carcinoma in situ of lip, oral cavity and pharynx  
13 malignant neoplasm of genitourinary organ  
14 malignant neoplasm of other and unspecified sites  
15 secondary malignant neoplasm of other specified sites  
16 [m]papillary and squamous cell neoplasms  
17 carcinoma in situ of liver and biliary system  
18 secondary and unspecified malignant neoplasm of lymph nodes  
19 malignant neoplasm of lower lip, inner aspect  
20 osteoma  
21 [x]other antineoplast drugs caus adverse eff in therap use  
22 [m]borderline mucinous cystadenoma of the ovary  
23 clark's melanoma level  
24 clark melanoma level  
25 malignant melanoma of eye  
26 secondary malignant neoplasm of unknown site  
27 [m]carcinoid tumour, argentaffin, nos  
28 epithelioma basal cell  
29 primary vulval cancer  
30 glaucoma due to ocular cyst  
31 osteitis deformans - paget's disease of the bone  
32 [x]other myasthenic syndromes in neoplastic disease ce  
33 dermatofibrosarcoma protuberans  
34 vaginal intraepithelial neoplasia grade 1  
35 mild vaginal dysplasia  
36 vaginal intraepithelial neoplasia grade 2  
37 moderate vaginal dysplasia  
38 vulval intraepithelial neoplasia grade 1  
39 vulval intraepithelial neoplasia grade 2  
40 vulval intraepithelial neoplasia grade 3  
41 monoclonal gammopathy of uncertain significance  
42 tumour lysis syndrome  
43 maltoma  
44 pancoast's syndrome  
45 tumor  
46 tumour  
47 overlapping malignant neoplasm of skin  
48 melanoma in situ of skin (clinical)  
49 ism - in situ melanoma of skin  
50 in situ malignant melanoma of skin

1 ismm - in situ malignant melanoma of skin  
2 in situ melanoma of skin  
3 melanoma in situ of ear  
4 overlapping malignant neoplasm of bone and articular cartilage  
5 overlapping malignant neoplasm of bone and articular cartilage of limbs  
6 cancer in situ  
7 overlapping malignant neoplasm of ill-defined site  
8 overlapping malignant neoplasm of nasopharynx  
9 overlapping malignant neoplasm of nasopharyngeal wall  
10 overlapping malignant neoplasm of hypopharynx  
11 overlapping malignant neoplasm of larynx  
12 overlapping malignant neoplasm of bronchus and lung  
13 malignant mesothelioma  
14 malignant mesothelioma of pericardium  
15 overlapping malignant neoplasm of heart, mediastinum and pleura  
16 epidemic kaposi's sarcoma  
17 ks - kaposi's sarcoma  
18 kaposi's sarcoma  
19 kaposi sarcoma  
20 kaposi sarcoma of skin  
21 kaposi sarcoma of palate  
22 kaposi sarcoma of lymph nodes  
23 kaposi sarcoma of multiple organs  
24 necrotizing sialometaplasia  
25 overlapping malignant neoplasm of tongue  
26 overlapping malignant neoplasm of major salivary gland  
27 cancer major salivary glands contiguous  
28 overlapping malignant neoplasm of floor of mouth  
29 cancer of the floor of mouth, overlapping sites  
30 overlapping malignant neoplasm of oesophagus  
31 overlapping malignant neoplasm of esophagus  
32 malignant neoplasm, overlapping lesion of esophagus  
33 overlapping malignant neoplasm of stomach  
34 cancer of the stomach, overlapping sites  
35 overlapping malignant neoplasm of small intestine  
36 cancer of the small intestine, overlapping sites  
37 hepatocarcinoma  
38 malignant hepatoma  
39 hcc - hepatocellular carcinoma  
40 lcc - liver cell carcinoma  
41 liver carcinoma  
42 hepatoblastoma  
43 angiosarcoma of liver  
44 overlapping malignant neoplasm of biliary tract  
45 overlapping malignant neoplasm of pancreas  
46 cancer of the pancreas, overlapping sites  
47 malignant mesothelioma of peritoneum  
48 cancer of the peritoneum, mesothelioma  
49 overlapping malignant neoplasm of male genital organs  
50 overlapping malignant neoplasm of penis

1 cancer of penis, overlapping sites  
2 overlapping malignant neoplasm of female genital organs  
3 cancer of the brain, overlapping sites  
4 overlapping malignant neoplasm of peripheral nerves and autonomic nervous system  
5 overlapping malignant neoplasm of eye and adnexa (primary)  
6 overlapping malignant neoplasm of eye and adnexa, primary  
7 cancer of the eye and adnexa, overlapping sites  
8 lymphoblastoma  
9 monoclonal gammopathy  
10 histiocytic sarcoma (clinical)  
11 vaquez's disease  
12 osler-vaquez syndrome  
13 osler's disease  
14 overlapping malignant neoplasm of palatine tonsil  
15 [x]personl hist/oth mal neop/lymphd,h'matopoietc+relat tissu  
16 transitional cell carcinoma, spindle cell  
17 transitional cell carcinoma, sarcomatoid  
18 transitional cell carcinoma - spindle cell  
19 bronchiolo-alveolar adenocarcinoma  
20 bronchiolo-alveolar carcinoma  
21 alveolar cell carcinoma  
22 bronchiolar carcinoma  
23 bronchiolar adenocarcinoma  
24 pseudomyxoma peritonei  
25 carcinosarcoma, embryonal  
26 embryonal carcinosarcoma  
27 [x]polyneuropathy in neoplastic disease ce  
28 cervical intraepithelial neoplasia  
29 [x]renal tubulo-interstitial disorders/neoplastic diseases ce  
30 cervical intraepithelial neoplasia grade i  
31 mild cervical dysplasia  
32 moderate cervical dysplasia  
33 cervical intraepithelial neoplasia grade ii  
34 oestrogens in malignant diseases  
35 adnexal and/or skin appendage neoplasm  
36 cystic, mucinous and/or serous neoplasm  
37 ductal, lobular and/or medullary neoplasm  
38 specialised gonadal neoplasm  
39 paraganglioma and/or glomus tumour  
40 paraganglioma and/or glomus tumor  
41 naevus and/or melanoma  
42 nevus and/or melanoma  
43 soft tissue tumour and/or sarcoma  
44 soft tissue tumor and/or sarcoma  
45 soft tissue tumour of fibrous differentiation  
46 soft tissue tumor of fibrous differentiation  
47 adipocytic neoplasm  
48 soft tissue tumour of adipose differentiation  
49 soft tissue tumor of adipose differentiation  
50 soft tissue tumour of muscle differentiation  
51 soft tissue tumor of muscle differentiation  
52 complex mixed and/or stromal neoplasm

1  
2 synovial like neoplasm  
3 blood vessel tumour  
4 osseous and/or chondromatous neoplasm  
5 giant cell tumour  
6 bone tumour  
7 bone tumor  
8 neurofibromas  
9  
10 granular cell tumour and/or alveolar soft part sarcoma  
11 granular cell tumor and/or alveolar soft part sarcoma  
12 [x]secondary malignant neoplasm/oth+unspc respiratory organs  
13 [x]secondary malignant neoplasm/oth+unspcfd digestive organs  
14 progestogens in malignant disease  
15 malignant mast cell tumour (clinical)  
16 malignant mast cell tumor (clinical)  
17 mast cell sarcoma  
18 malignant mast cell tumour  
19 malignant mast cell tumor  
20 ovarian mature cystic teratoma  
21 neoplasm of endometrium  
22 cutaneous tumour  
23 tumour of skin  
24 skin tumour  
25 cutaneous tumor  
26 skin tumor  
27 tumor of skin  
28 neoplasm of sweat gland  
29 tumour of skin with eccrine differentiation  
30 tumor of skin with eccrine differentiation  
31 neoplasm of stomach  
32 tumor of stomach  
33 neoplasm of large intestine  
34 tumour of large intestine  
35 tumor of large intestine  
36 neoplasm of biliary tract  
37 tumor of biliary tract  
38 tumour of biliary tract  
39 neoplasm of pancreas  
40 tumor of pancreas  
41 tumour of pancreas  
42 neoplasm of kidney  
43 renal tumour  
44 tumour of kidney  
45 tumor of kidney  
46 renal tumor  
47 tumour of urinary bladder  
48 tumor of urinary bladder  
49 ngb - new growth of bladder  
50 tumour of breast  
51 breast tumour  
52 breast tumor

1 tumor of breast  
2 vestibular schwannoma  
3 acoustic neurilemmoma  
4 acoustic schwannoma  
5 neoplasm of adrenal gland  
6 adrenal tumour  
7 tumour of adrenal gland  
8 adrenal tumor  
9 tumor of adrenal gland  
10 tumor of adrenal cortex  
11 tumour of adrenal cortex  
12 neoplasm of pituitary gland  
13 pituitary tumour  
14 tumour of pituitary gland  
15 pituitary tumor  
16 tumor of pituitary gland  
17 histiocytic necrotising lymphadenitis  
18 histiocytic necrotizing lymphadenitis  
19 melanoma in situ by body site (clinical)  
20 in situ neoplasm (morphology)  
21 in situ neoplasm  
22 basal cell neoplasm (morphology)  
23 basal cell neoplasm  
24 mucoepidermoid neoplasm (morphology)  
25 mucoepidermoid neoplasm  
26 mesonephric neoplasm (morphology)  
27 mesonephric neoplasm  
28 meningeal neoplasm (morphology)  
29 meningeal-derived tumour  
30 meningeal neoplasm  
31 mast cell neoplasm  
32 metastatic neoplasm (disease)  
33 ca - secondary cancer  
34 metastases  
35 metastatic neoplasm  
36 secondaries  
37 secondary cancer  
38 metastatic malignant disease  
39 secondary tumor  
40 tumor metastasis  
41 secondary malignant deposit  
42 secondary tumour  
43 tumour metastasis  
44 metastatic cancer  
45 accid cut,puncture,perf,h'ge - aspirate fluid/tiss, cath nos  
46 accid cut,puncture,perf,h'ge - injection or vaccination nos  
47 histiocytic neoplasm (morphology)  
48 histiocytic neoplasm  
49 dysmyelopoietic syndrome  
50 accid cut,puncture,perf,h'ge - other perfusion

1 pituitary carcinoma  
2 serous surface papillary tumour of borderline malignancy  
3 endometrial stromal sarcoma, low grade  
4 stromal myosis  
5 stromal endometriosis  
6 endometrial stromatosis  
7 endometrioid stromal sarcoma, low grade  
8 nonlipid reticuloendotheliosis [obs]  
9 histiocytic sarcoma  
10 papillary ependymoma  
11 rars  
12 serous cystadenoma, borderline malignancy  
13 serous tumor of low malignant potential  
14 atypical proliferating serous tumor  
15 atypical proliferating serous tumour  
16 serous tumour of low malignant potential  
17 serous borderline tumor  
18 serous tumor, atypical proliferative  
19 serous borderline tumour  
20 serous tumour, atypical proliferative  
21 papillary cystadenoma, borderline malignancy  
22 serous papillary cystic tumour of borderline malignancy  
23 papillary serous tumor of low malignant potential  
24 papillary serous cystadenoma, borderline malignancy  
25 atypical proliferative papillary serous tumor  
26 serous papillary cystic tumor of borderline malignancy  
27 papillary serous tumour of low malignant potential  
28 atypical proliferative papillary serous tumour  
29 mucinous cystic tumour of borderline malignancy  
30 pseudomucinous cystadenoma, borderline malignancy  
31 mucinous tumor of low malignant potential  
32 mucinous cystadenoma, borderline malignancy  
33 atypical proliferative mucinous tumor  
34 mucinous cystic tumor of borderline malignancy  
35 atypical proliferative mucinous tumour  
36 mucinous tumour of low malignant potential  
37 pseudomucinous cystadenoma - borderline malignancy  
38 mucinous borderline tumour  
39 mucinous borderline tumor  
40 papillary mucinous tumor of low malignant potential  
41 papillary mucinous tumour of low malignant potential  
42 spongioblastoma [obs]  
43 piloid astrocytoma  
44 juvenile astrocytoma  
45 spongioblastoma  
46 alpha cell tumour  
47 thymoma, no icd-o subtype  
48 thymoma, no international classification of diseases for oncology subtype  
49 central neurocytoma  
50 neurolipocytoma

1  
2 medullocytoma  
3 lipomatous medulloblastoma  
4 central neurocytoma - histology  
5 villous papilloma  
6 juxtaglomerular tumour  
7 reninoma  
8 juxtaglomerular tumor  
9 ultimobranhial thyroid tumour  
10 ultimobranhial thyroid tumor  
11 parafollicular cell carcinoma  
12 c cell carcinoma  
13 parosteal osteosarcoma  
14 juxtacortical osteosarcoma  
15 eosinophilic granuloma (clinical)  
16 eosinophilic xanthomatous granuloma  
17 pheochromocytoma  
18 osteoma  
19 accidental cut,puncture,perf,h'ge - puncture procedure nos  
20 accidental cut,puncture,perf,h'ge during catheterisation nos  
21 basal cell carcinoma - morpheic  
22 morpheaform basal cell carcinoma  
23 carcinomatosis  
24 metaplasia of trigone  
25 malignant neoplasm of epiglottis nos  
26 metastatic calcification  
27 malignant neoplasm of lip, unspecified  
28 malignant melanoma of back  
29 primary malignant neoplasm of unknown site  
30 malignant neoplasm of canthus  
31 malignant neoplasm of pinna nec  
32 malignant neoplasm of skin of scapular region  
33 squamous metaplasia of lung  
34 malignant melanoma of chest wall  
35 malignant neoplasm of upper eyelid  
36 malignant neoplasm of lower eyelid  
37 [m]tibial adamantinoma  
38 seminoma of undescended testis  
39 seminoma of descended testis  
40 local recurrence of malignant tumour of breast  
41 local recurrence of malignant tumour of urinary bladder  
42 melanoma in situ of back of hand  
43 hereditary nonpolyposis colon cancer  
44 paget's disease of bone  
45 melanoma in situ of back  
46 pain from metastases  
47 severe dyskaryosis on cervical smear cannot exclude invasive carcinoma  
48 cannot exclude glandular neoplasia on cervical smear  
49 screening for malignant neoplasm of cervix not wanted  
50 cancer of cervix screening not wanted  
51 cancer cervix screening - wanted

1 cancer cervix screening - not needed  
2 cancer cervix screening - up-to-date  
3 cancer cervix screening - not reached  
4 cancer cervix screen-no result yet  
5 cancer cervix screening and fee claim  
6 screening for malignant neoplasm of urinary system  
7 urinary neoplasm screening  
8 screening for bladder tumour  
9 cystoscopy and laser destruction of bladder lesion  
10 endoscopic destruction of bladder tumor by laser  
11 nonobstetrical perineoplasty  
12 patient on regional cancer register  
13 priority cancer referral  
14 megakaryocytic hypoplasia  
15 malignant neoplasm of descended testis nos  
16 lgv - lymphogranuloma venereum  
17 lymphogranuloma inguinale  
18 malignant tumour of oral aspect of upper lip  
19 malignant tumour of inner aspect of upper lip  
20 malignant tumour of buccal aspect of upper lip  
21 malig tumour of mucosa of upper lip  
22 malignant tumor of upper labial mucosa  
23 malig tumor of mucosa of upper lip  
24 malignant tumor of buccal aspect of upper lip  
25 malignant tumor of inner aspect of upper lip  
26 malignant tumor of oral aspect of upper lip  
27 malignant tumour of fraenum of upper lip  
28 malignant tumor of frenum of upper lip  
29 malignant tumour of fraenum of lower lip  
30 malignant tumor of frenum of lower lip  
31 malignant tumour of labial mucosa  
32 malignant tumor of labial mucosa  
33 malignant tumor of buccal aspect of lip  
34 malignant tumor of mucosa of lip  
35 malignant tumor of oral aspect of lip  
36 malignant tumor of inner aspect of lip  
37 malignant tumour of inner aspect of lip  
38 malignant tumour of buccal aspect of lip  
39 malignant tumour of oral aspect of lip  
40 malignant tumour of mucosa of lip  
41 malignant tumour of anterior two-thirds of tongue - dorsal surface  
42 malignant tumor of anterior two-thirds of tongue - dorsal surface  
43 malignant tumour of anterior two-thirds of tongue - ventral surface  
44 malignant tumor of anterior two-thirds of tongue - ventral surface  
45 malignant tumour of fraenum linguae  
46 malignant tumor of frenum linguae  
47 malignant tumour of junctional zone of tongue  
48 malignant tumor of junctional zone of tongue  
49 malignant tumour of anterior floor of mouth  
50 malignant tumor of anterior floor of mouth



1 malignant tumour of lateral floor of mouth  
2 malignant tumor of lateral floor of mouth  
3 malignant tumor of vestibule of mouth  
4 malignant tumour of upper buccal sulcus  
5 malignant tumor of upper buccal sulcus  
6 malignant tumour of lower buccal sulcus  
7 malignant tumor of lower buccal sulcus  
8 malignant tumour of upper labial sulcus  
9 malignant tumor of upper labial sulcus  
10 malignant tumour of lower labial sulcus  
11 malignant tumor of lower labial sulcus  
12 malignant tumour of tonsillar pillar  
13 malignant tumor of palatopharyngeal arch  
14 malignant tumour of posterior tonsillar pillar  
15 malignant tumor of pharyngopalatine arch  
16 malignant tumour of posterior faucial pillar  
17 malignant tumor of tonsillar pillar  
18 malignant tumor of palatopharyngeal arch  
19 malignant tumor of pharyngopalatine arch  
20 malignant tumor of posterior faucial pillar  
21 malignant tumor of posterior tonsillar pillar  
22 malignant tumour of glossoepiglottic fold  
23 malignant tumor of glossoepiglottic fold  
24 malignant tumour of posterior wall of oropharynx  
25 malignant tumor of posterior wall of oropharynx  
26 malignant tumor of epipharynx  
27 malignant tumor of postnasal space  
28 cancer of nasopharynx  
29 ca - cancer of nasopharynx  
30 malignant tumour of epipharynx  
31 malignant tumour of postnasal space  
32 malignant tumor of nasopharynx  
33 malignant tumor of posterior wall of nasopharynx  
34 malignant tumour of adenoid  
35 malignant tumor of adenoid  
36 malignant tumor of nasopharyngeal tonsil  
37 malignant tumor of pharyngeal tonsil  
38 malignant tumour of pharyngeal tonsil  
39 malignant tumour of nasopharyngeal tonsil  
40 malignant tumour of pharyngeal recess  
41 malignant tumor of fossa of rosenmuller  
42 malignant tumor of pharyngeal recess  
43 malignant tumor of fossa of rosenmuller  
44 malignant tumour of opening of auditory tube  
45 malignant tumor of opening of auditory tube  
46 malignant tumor of anterior wall of nasopharynx  
47 malignant tumour of nasopharyngeal soft palate surface  
48 malignant tumor of nasopharyngeal soft palate surface  
49 malignant tumour aryepiglottic fold - hypopharyngeal aspect  
50 malignant tumor aryepiglottic fold - hypopharyngeal aspect  
51  
52  
53  
54  
55  
56  
57  
58  
59  
60

1 malignant tumour of waldeyer's ring  
2 malignant tumor of waldeyer's ring  
3 malignant tumor of waldeyer ring  
4 malignant tumour of cervical part of oesophagus  
5 malignant tumor of cervical part of esophagus  
6 malignant neoplasm of cervical esophagus  
7 malignant tumour of thoracic part of oesophagus  
8 malignant neoplasm of thoracic esophagus  
9 malignant tumor of thoracic part of esophagus  
10 malignant tumour of abdominal part of oesophagus  
11 malignant tumor of abdominal part of esophagus  
12 malignant neoplasm of abdominal esophagus  
13 malignant tumour of upper third of oesophagus  
14 malignant neoplasm of upper third of esophagus  
15 malignant tumor of upper third of esophagus  
16 ca upper third esophagus  
17 malignant tumour of middle third of oesophagus  
18 malignant tumor of middle third of esophagus  
19 malignant neoplasm of middle third of esophagus  
20 ca middle third esophagus  
21 malignant tumour of lower third of oesophagus  
22 malignant neoplasm of lower third of esophagus  
23 malignant tumor of lower third of esophagus  
24 ca lower third esophagus  
25 malignant tumour of cardia  
26 malignant tumor of cardia  
27 malignant neoplasm of cardio-esophageal junction of stomach  
28 malignant neoplasm of gastro-esophageal junction  
29 malignant neoplasm of cardioesophageal junction of stomach  
30 malignant tumour of pylorus  
31 malignant tumor of pylorus  
32 eosinophilic granuloma  
33 malignant tumour of pyloric antrum  
34 malignant tumor of pyloric antrum  
35 malignant tumour of fundus of stomach  
36 malignant tumor of fundus of stomach  
37 malignant tumour of body of stomach  
38 malignant tumor of body of stomach  
39 malignant tumour of meckel's diverticulum  
40 malignant tumor of meckel's diverticulum  
41 malignant tumor of meckel diverticulum  
42 ca intrahepatic bile ducts  
43 intrahepatic bile duct cancer  
44 malignant tumour of body of pancreas  
45 malignant tumor of body of pancreas  
46 ca body of pancreas  
47 malignant tumour of tail of pancreas  
48 malignant tumor of tail of pancreas  
49 ca tail of pancreas  
50 malignant tumour of pancreatic duct  
51

1 malignant tumor of pancreatic duct  
2 malignant islet cell tumour  
3 malignant islet cell tumor  
4 malignant tumor of peritoneum and retroperitoneum  
5 malignant neoplasm of retrocecal tissue  
6 malignant neoplasm of mesocecum  
7 malignant neoplasm of nasal turbinate  
8 malignant tumour of nasal vestibule  
9 malignant tumor of nasal vestibule  
10 malignant tumour of eustachian tube  
11 malignant tumor of eustachian tube  
12 malignant tumor of auditory tube  
13 malignant tumour of auditory tube  
14 malignant tumour of tympanic cavity  
15 malignant tumor of tympanic cavity  
16 malignant tumour of tympanic antrum  
17 malignant tumor of tympanic antrum  
18 malignant tumour of glottis  
19 malignant tumor of glottis  
20 malignant tumour of supraglottis  
21 malignant tumor of supraglottis  
22 malignant neoplasm of right middle lobe of lung  
23 malignant neoplasm of ribs and/or sternum and/or clavicle  
24 malignant neoplasm of costovertebral joint  
25 malignant neoplasm of navicular bone of hand  
26 malignant neoplasm of trapezial bone  
27 malignant neoplasm of connective and soft tissue of forearm  
28 malignant neoplasm, overlapping lesion of connective and soft tissue  
29 kaposi's sarcoma of soft tissues  
30 kaposi sarcoma of soft tissue  
31 malignant melanoma of ear and/or external auditory canal  
32 malignant melanoma of ear and/or external auricular canal  
33 malignant melanoma of forearm  
34 malignant neoplasm of skin of ear and external auditory canal  
35 malignant neoplasm of scalp and/or skin of neck  
36 malignant neoplasm of skin of scalp  
37 malignant neoplasm of skin of forearm  
38 chorioepithelioma  
39 chorionepithelioma  
40 malignant neoplasm of gartner duct  
41 malignant tumor of undescended testis  
42 cancer of undescended testis  
43 malignant tumour of retained testis  
44 malignant tumor of retained testis  
45 malignant tumour of ectopic testis  
46 cancer of ectopic testis  
47 malignant tumor of ectopic testis  
48 malignant tumour of body of penis  
49 malignant tumour of shaft of penis  
50 malignant tumor of body of penis

1 cancer of body of penis  
2 malignant tumor of shaft of penis  
3 malignant tumour of seminal vesicle  
4 malignant tumor of seminal vesicle  
5 malignant tumour of tunica vaginalis  
6 malignant tumor of tunica vaginalis  
7 malignant tumour of trigone of urinary bladder  
8 malignant tumor of trigone of urinary bladder  
9 malignant tumour of trigone of bladder  
10 malignant tumor of trigone of bladder  
11 malignant tumour of vault of bladder  
12 malignant tumor of bladder dome  
13 malignant neoplasm of vault of bladder  
14 malignant tumor of bladder dome  
15 malignant tumour of vault of bladder  
16 malignant tumor of vault of bladder  
17 malignant tumour of bladder neck  
18 malignant tumor of bladder neck  
19 malignant tumour of ureteric orifice  
20 malignant tumor of ureteric orifice  
21 overlapping malignant neoplasm of urinary bladder  
22 overlapping malignant neoplasm of bladder  
23 malignant tumour of kidney parenchyma  
24 malignant tumor of kidney parenchyma  
25 malignant tumour of renal calyx  
26 malignant neoplasm of renal calyx  
27 malignant tumor of renal calyx  
28 malignant tumour of pelviureteric junction  
29 malignant tumor of pelviureteric junction  
30 malignant neoplasm of pelviureteric junction  
31 malignant tumour of ciliary body  
32 malignant tumor of ciliary body  
33 malignant tumour of iris  
34 malignant tumor of iris  
35 malignant tumour of lacrimal gland  
36 malignant tumor of lacrimal gland  
37 malignant neoplasm of lacrimal duct  
38 malignant tumour of hypothalamus  
39 malignant tumor of hypothalamus  
40 malignant tumour of choroid plexus  
41 malignant tumor of choroid plexus  
42 malignant tumor of cranial nerve  
43 peripheral nerve cancer, thorax  
44 malignant tumour of craniopharyngeal duct  
45 malignant tumor of craniopharyngeal duct  
46 malignant tumour of thorax  
47 malignant tumor of thorax  
48 malignant tumor of abdomen  
49 malignant tumour of abdomen  
50 metastatic malignant neoplasm to uterine cervix  
51 metastatic malignant neoplasm to cervix uteri  
52  
53  
54  
55  
56  
57  
58  
59  
60

1 secondary malignant neoplasm of uterine cervix  
2 cancer metastatic to cervix  
3 secondary malignant neoplasm of epididymis and vas deferens  
4 malignant mast cell tumors  
5 carcinoma in situ of splenic flexure  
6 carcinoma in situ of carina  
7 non-invasive carcinoma of breast  
8 carcinoid tumour - morphology  
9 carcinoid tumor  
10 carcinoid  
11 carcinoid tumour  
12 carcinoid tumor - morphology  
13 dermoid cyst with secondary tumour  
14 dermoid cyst with malignant transformation  
15 dermoid cyst with secondary tumor  
16 choriocarcinoma combined with teratoma  
17 pinealoma - morphology  
18 primitive polar spongioblastoma  
19 monstrocellular sarcoma  
20 reticulum cell sarcoma morphology  
21 diencephalic syndrome secondary to tumor  
22 paraneoplastic cerebellar degeneration  
23 myasthenic syndrome due to another disorder  
24 non-neoplastic nevus  
25 paget's disease of humerus  
26 paget's disease of skull  
27 brown tumor of hyperparathyroidism  
28 malignant neoplasm of mesentery  
29 malignant neoplasm of omentum  
30 malignant neoplasm of labia majora  
31 malignant neoplasm of labia minora  
32 malignant neoplasm of frontal lobe  
33 malignant neoplasm of temporal lobe  
34 malignant neoplasm of parietal lobe  
35 malignant neoplasm of occipital lobe  
36 malignant neoplasm of cerebral ventricles  
37 malignant neoplasm of cerebral meninges  
38 malignant neoplasm of spinal meninges  
39 malignant neoplasm of cauda equina  
40 macrodactyly of fingers- fatty nerve tumour  
41 macrodactyly of toes - fatty nerve tumour  
42 cancer phobia  
43 adverse reaction caused by antineoplastic antibiotics  
44 antineoplastic antibiotic poisoning  
45 bowel cancer screening programme  
46 malignant tumor of eyelid  
47 malignant neoplasm of eyelid  
48 wilms' tumor and nephrotic syndrome with pseudohermaphroditism  
49 carcinoma in situ of cheek  
50 carcinoma in situ of vocal fold - glottis

1 carcinoma in situ of oral cavity  
2 carcinoma in situ of pyloric canal  
3 vulval intraepithelial neoplasia  
4 tumor of endocrine pancreas  
5 pancreatic endocrine tumour  
6 pancreatic endocrine tumor  
7 secondary malignant neoplasm of breast  
8 secondary cancer of the vulva  
9 squamous metaplasia of cervix  
10 multiple endocrine neoplasia, type 1  
11 dermatomyositis with malignant disease  
12 did not attend bowel cancer screening programme nurse clinic  
13 bowel cancer screening programme administration  
14 bowel cancer screening declined  
15 did not attend bowel cancer screening  
16 bowel cancer detected by national screening programme  
17 patient given advice about bowel cancer  
18 breast neoplasm screen abnorm  
19 breast neoplasm screen nos  
20 ca female breast  
21 ca-in-situ of g.i. tract  
22 tumour embolus  
23 tumour embolism  
24 tumor embolus  
25 tumor embolism  
26 cin iii - cervical intraepithelial neoplasia grade iii with severe dysplasia  
27 delta cell tumour  
28 intravascular bronchial alveolar tumour  
29 intravascular bronchial alveolar tumor  
30 sympathicoblastoma  
31 pigmented schwannoma  
32 melanotic schwannoma  
33 cancers  
34 congenital sternomastoid tumor  
35 tumor staging  
36 tnm tumour staging system  
37 tnm tumor staging  
38 tnm tumor staging system  
39 tumor-node-metastasis (tnm) tumor staging system  
40 tumor-node-metastasis (tnm) tumour staging system  
41 figo staging system of gynaecological malignancy  
42 federation internationale de gynecologie et d'obstetrique staging of gynaecological malignancy  
43 figo staging of gynecological malignancy  
44 federation internationale de gynecologie et d'obstetrique staging of gynecological malignancy  
45 figo staging system of gynecological malignancy  
46 international federation of gynaecology and obstetrics (figo) staging system of gynaecological malignancy  
47 international federation of gynecology and obstetrics staging system of gynecological malignancy  
48 malignant tumor of anterior pillar of fauces  
49 malignant tumour of anterior faucial pillar  
50 malignant tumour of anterior tonsillar pillar

1 malignant tumour of palatoglossal arch  
2 malignant tumor of palatoglossal arch  
3 malignant tumor of anterior tonsillar pillar  
4 malignant tumor of anterior faucial pillar  
5 mixed parotid tumor  
6 malignant tumor of posterior margin of nasal septum and choanae  
7 adenocarcinoma of rectum  
8 carcinoid tumor of lung  
9 small cell carcinoma of lung  
10 sclc - small cell lung cancer  
11 epidermoid carcinoma of lung  
12 scc - squamous cell carcinoma of lung  
13 nsccl - non-small cell lung cancer  
14 scc - cutaneous squamous cell carcinoma  
15 cutaneous squamous cell carcinoma  
16 scc - squamous cell carcinoma of skin  
17 spinous cell carcinoma  
18 squamous cell carcinoma in situ of skin  
19 iec - intraepidermal carcinoma of skin  
20 scc - squamous cell carcinoma in situ of skin  
21 intraepidermal carcinoma of skin  
22 cancer in situ skin, squamous cell  
23 ferguson-smith tumor  
24 ferguson-smith tumour  
25 basalioma  
26 bcc - basal cell carcinoma of skin  
27 ru - rodent ulcer  
28 cancer of skin, basal cell  
29 fammm - familial atypical mole malignant melanoma syndrome  
30 familial atypical mole malignant melanoma syndrome  
31 malignant tumour of breast  
32 malignant tumor of breast  
33 breast cancer  
34 ca - breast cancer  
35 malignant neoplasm of breast  
36 carcinoma gallbladder  
37 pin - prostatic intraepithelial neoplasia  
38 intracranial tumour  
39 ict - intracranial tumour  
40 bt - brain tumour  
41 brain tumour  
42 intracranial neoplasm  
43 carcinoma in situ of biliary system  
44 malignant tumour of acoustic vestibular nerve  
45 malignant tumor of acoustic vestibular nerve  
46 iris melanoma  
47 malignant tumor of unknown origin  
48 malignant tumor - unknown primary  
49 ukp - malignant tumor - unknown primary  
50 malignant tumour - unknown primary

1 ukp - malignant tumour - unknown primary  
2 ca - cancer of unknown origin  
3 metastasis - unknown primary  
4 cancer - unknown origin  
5 malignant tumour of head and neck  
6 malignant tumour of head and/or neck  
7 malignant tumor of head and/or neck  
8 carcinoma in situ of digestive organs  
9 carcinoma of lip, oral cavity and/or pharynx  
10 malignant tumor of digestive organ  
11 carcinoma of cecum  
12 angioendotheliomatosis  
13 malignant angioendotheliomatosis  
14 carcinoma in situ of urinary tract  
15 carcinoma in situ of gall bladder  
16 carcinoma in situ of gums  
17 carcinoma in situ of nasal sinuses  
18 carcinoma in situ of other specified part respiratory system  
19 carcinoma in situ of salivary glands  
20 carcinoma in situ of skin of leg  
21 carcinoma in situ of skin of other parts of face  
22 carcinoma in situ of skin of other parts of face nos  
23 carcinoma in situ of specified parts respiratory system nos  
24 carcinoma in situ other and unspecified female genital organ  
25 carcinoma in situ other and unspecified male genital organs  
26 carcinoma in situ other and unspecified small intestine nos  
27 carcinoma in situ skin of ear and external auricular canal  
28 carcinoma in situ skin of ear/external auricular canal nos  
29 carcinoma of digestive organs and peritoneum  
30 cerebral metastasis  
31 cerebral tumour - malignant  
32 cervical carcinoma (uterus)  
33 cervical intraepithelial neoplasia grade iii  
34 cervical neoplasia screen  
35 cervical smear: ? gland neopl.  
36 tumor of uterine body in pregnancy, childbirth and the puerperium  
37 tumor of uterine body affecting obstetric care  
38 tumor of uterine body - baby delivered  
39 tumor of uterine body - baby delivered with postpartum complication  
40 tumor of uterine body complicating antenatal care, baby not yet delivered  
41 monoclonal paraproteinemia  
42 glaucoma due to ocular tumor or cyst  
43 congenital torticollis  
44 contracture of sternocleidomastoid muscle  
45 congenital wryneck  
46 cancer cervix screening - not attended  
47 cancer cervix - screening done  
48 screening for malignant neoplasm of respiratory tract  
49 respiratory neoplasm screening  
50 screening for malignant neoplasm of breast



1 breast cancer screening  
2 screening for breast cancer  
3 screening for malignant neoplasm of large intestine  
4 malignant neoplasm of digestive organs and peritoneum  
5 malignant tumor of lesser curve of stomach  
6 ca lesser curvature - stomach  
7 malignant tumour of greater curve of stomach  
8 malignant tumor of greater curve of stomach  
9 ca greater curvature - stomach  
10 malignant neoplasm of soft tissue  
11 malignant tumour of soft tissue  
12 malignant tumor of soft tissue  
13 malignant neoplasm of lip, oral cavity and/or pharynx  
14 carcinoma in situ of lip, oral cavity and/or pharynx  
15 chondroma  
16 malignant tumour of mucosa of lower lip  
17 malignant tumour of oral aspect of lower lip  
18 malignant tumour of inner aspect of lower lip  
19 malignant tumour of buccal aspect of lower lip  
20 malignant tumor of lower labial mucosa  
21 malignant tumor of buccal aspect of lower lip  
22 malignant tumor of inner aspect of lower lip  
23 malignant tumor of oral aspect of lower lip  
24 malignant tumor of mucosa of lower lip  
25 choriadenoma (destruens)  
26 choriocarcinoma  
27 mm - malignant melanoma of eye  
28 squamous cell carcinoma of skin nos  
29 [m]squamous cell carcinoma of skin nos  
30 carcinoid tumour - argentaffin  
31 argentaffinoma  
32 carcinoid tumor - argentaffin  
33 malignant tumour of lipstick area of lip  
34 malignant tumor of lipstick area of lip  
35 cin i - ii, cervical dysplasia  
36 cin i - mild dyskaryosis  
37 cin ii - moderate dyskaryosis  
38 cin iii - carcinoma in situ of cervix  
39 cin iii - severe dyskaryosis  
40 screening for malignant neoplasm of colon  
41 screening for colon cancer  
42 colon cancer screening  
43 screening for malignant neoplasm of rectum  
44 rectal neoplasm screening  
45 screening for malignant neoplasm of lung  
46 lung neoplasm screening  
47 dfsp - dermatofibrosarcoma protruberans  
48 dermatofibrosarcoma  
49 vain - vaginal intraepithelial neoplasia 1  
50 vain - vaginal intraepithelial neoplasia 2

1 mild dysplasia of vulva  
2 vin - vulval intraepithelial neoplasia grade 1  
3 moderate dysplasia of vulva  
4 vin - vulval intraepithelial neoplasia grade 2  
5 vulval intraepithelial neoplasia grade iii  
6 vin - vulval intraepithelial neoplasia grade 3  
7 vin iii - vulval intraepithelial neoplasia grade iii  
8 severe dysplasia of vulva  
9 malignant tumour of external ear  
10 malignant tumor of external ear  
11 progesterone receptor negative tumour  
12 oestrogen receptor negative tumour  
13 mgus - monoclonal gammopathy of uncertain significance  
14 monoclonal gammopathy of undetermined significance  
15 tumour hormone receptor status  
16 lymphoreticular tumour  
17 lymphoreticular tumor  
18 superior pulmonary sulcus syndrome  
19 pancoast syndrome  
20 malignant tumour of lacrimal drainage structure  
21 malignant tumor of lacrimal drainage structure  
22 cin - cervical intraepithelial neoplasia  
23 cin i - cervical intraepithelial neoplasia 1  
24 mild dysplasia of cervix  
25 cin 2 - cervical intraepithelial neoplasia 2  
26 moderate dysplasia of cervix  
27 lung tumour excision  
28 open bladder tumour fulguration  
29 open bladder tumour resection  
30 colon neoplasm screen  
31 colonic cancer  
32 antineoplastic/immunosuppressant/immunostim adverse reaction  
33 antineoplastic/immunosuppressant/immunostimulant adverse reaction  
34 excision of malignant skin tumor  
35 malignant tumour of fraenum of lip  
36 malignant tumor of frenum of lip  
37 malignant tumour of soft tissue of head, face and neck  
38 malignant tumor of soft tissue of head, face and neck  
39 malignant tumour of unknown origin or ill-defined site  
40 malignant tumor of unknown origin or ill-defined site  
41 chromaffin paraganglioma  
42 adrenal medullary paraganglioma  
43 lm - lentigo maligna  
44 nephroblastoma  
45 nephroma  
46 wilm's tumor  
47 wilms tumour  
48 wilms tumor  
49 gastric metaplasia of esophagus  
50 gastric metaplasia of oesophagus

1 metastasis to multiple lymph nodes  
2 osteosarcoma of bone  
3 osteosarcoma - disorder  
4 disseminated carcinomatosis  
5 carcinoid syndrome  
6 excision biopsy of basal cell carcinoma  
7 excision biopsy of rodent ulcer  
8 wermer's syndrome  
9 curettage of lesion of bone and graft hfq  
10 local recurrence of malignant tumor of breast  
11 local recurrence of malignant tumor of urinary bladder  
12 hnpcc - hereditary nonpolyposis colon cancer  
13 hnpcc - hereditary nonpolyposis colorectal cancer  
14 pain of metastatic malignancy  
15 cystoscopic extirpation of bladder lesion  
16 recurrence of tumour  
17 meckel's diverticulum  
18 persistent omphalomesenteric duct  
19 persistent vitelline duct  
20 malignant tumour  
21 malignant tumor  
22 ca - cancer  
23 malignant tumor of lip  
24 ca - cancer of lip  
25 cancer of lip  
26 malignant tumour of stomach  
27 cancer of stomach  
28 gastric cancer  
29 ca - cancer of stomach  
30 malignant tumour of caecum  
31 malignant tumor of cecum  
32 ca - cancer of caecum  
33 cancer of caecum  
34 malignant neoplasm of cecum  
35 ca - cancer of cecum  
36 cancer of cecum  
37 cecal cancer  
38 malignant tumour of rectum  
39 rectal cancer  
40 ca - cancer of rectum  
41 malignant tumor of anal canal  
42 cancer of anal canal  
43 malignant tumour of gallbladder  
44 gallbladder ca  
45 malignant tumor of cervix  
46 cancer of cervix  
47 malignant neoplasm of cervix  
48 cancer of the uterine cervix  
49 cervical cancer  
50 malignant tumour of adrenal gland

1 malignant tumor of adrenal gland  
2 ca - cancer of adrenal gland  
3 cancer of adrenal gland  
4 adrenal gland malignancy  
5 malignant tumour of lung  
6 ca - lung cancer  
7 malignant tumour of anterior two-thirds of tongue  
8 malignant tumor of anterior two-thirds of tongue  
9 malignant tumour of soft tissue of thorax  
10 malignant tumor of soft tissue of thorax  
11 malignant neoplasm of soft tissue of thorax  
12 malignant tumour of soft tissue of pelvis  
13 malignant tumor of soft tissue of pelvis  
14 malignant tumour of vulva  
15 cancer of vulva  
16 malignant tumor of vermilion border of upper lip  
17 malignant tumour of lipstick area of upper lip  
18 malignant tumor of lipstick area of upper lip  
19 malignant tumor of vermilion border of lower lip  
20 malignant tumour of lipstick area of lower lip  
21 malignant tumor of lipstick area of lower lip  
22 malignant tumour of commissure of lip  
23 malignant tumor of commissure of lip  
24 malignant tumour of labial commissure  
25 malignant tumor of labial commissure  
26 malignant tumor of tongue  
27 ca - cancer of tongue  
28 cancer of tongue  
29 malignant tumour of base of tongue  
30 malignant tumour of posterior third of tongue  
31 malignant tumour of fixed part of tongue  
32 malignant tumour of tongue posterior to vallate papillae  
33 malignant tumor of fixed part of tongue  
34 malignant tumor of tongue posterior to vallate papillae  
35 malignant tumor of posterior third of tongue  
36 malignant tumour of lingual tonsil  
37 malignant tumor of lingual tonsil  
38 malignant tumor of major salivary gland  
39 malignant tumor of parotid gland  
40 cancer of parotid gland  
41 ca - cancer of parotid gland  
42 malignant tumour of submandibular gland  
43 malignant tumor of submandibular gland  
44 malignant tumour of sublingual gland  
45 malignant tumor of sublingual gland  
46 malignant tumour of gum  
47 malignant tumor of gum  
48 malignant tumour of alveolar mucosa  
49 malignant tumour of gingiva  
50 malignant tumor of alveolar mucosa

1 malignant tumor of gingiva  
2 cancer of gum  
3 ca - cancer of gum  
4 malignant tumour of upper gingiva  
5 malignant tumor of upper gingiva  
6 malignant tumour of upper gum  
7 malignant tumor of upper gum  
8 malignant tumour of lower gingiva  
9 malignant tumor of lower gingiva  
10 malignant tumour of lower gum  
11 malignant tumor of lower gum  
12 malignant tumor of floor of mouth  
13 fom - malignant tumour of floor of mouth  
14 fom - malignant tumor of floor of mouth  
15 fom - cancer of floor of mouth  
16 cancer of floor of mouth  
17 ca - cancer of floor of mouth  
18 malignant tumour of buccal mucosa  
19 malignant tumor of buccal mucosa  
20 malignant tumour of internal cheek  
21 malignant tumor of internal cheek  
22 malignant tumour of cheek mucosa  
23 malignant tumor of cheek mucosa  
24 ca - cancer of cheek mucosa  
25 ca - cancer of buccal mucosa  
26 cancer of cheek mucosa  
27 cancer of buccal mucosa  
28 malignant tumour of hard palate  
29 malignant tumor of hard palate  
30 malignant tumour of soft palate  
31 malignant tumor of soft palate  
32 malignant tumour of uvula  
33 malignant tumor of uvula  
34 malignant tumor of palate  
35 malignant tumour of roof of mouth  
36 malignant tumor of roof of mouth  
37 cancer of palate  
38 ca - cancer of palate  
39 malignant tumour of retromolar area  
40 malignant tumor of retromolar area  
41 malignant tumor of oropharynx  
42 cancer of oropharynx  
43 ca - cancer of oropharynx  
44 malignant tumour of mesopharynx  
45 malignant tumor of mesopharynx  
46 malignant tumour of tonsil  
47 malignant tumour of palatine tonsil  
48 malignant tumour of faucial tonsil  
49 malignant tumor of faucial tonsil  
50 malignant tumor of palatine tonsil  
51 malignant tumor of palatine tonsil

1 cancer of tonsil  
2 ca - cancer of tonsil  
3 malignant tumor of tonsillar fossa  
4 malignant tumour of vallecula  
5 malignant tumor of vallecula  
6 malignant tumour of branchial cleft  
7 malignant tumor of branchial cleft  
8 malignant tumour of roof of nasopharynx  
9 malignant tumor of roof of nasopharynx  
10 malignant tumour of superior wall of nasopharynx  
11 malignant tumor of superior wall of nasopharynx  
12 malignant tumor of lateral wall of nasopharynx  
13 malignant tumour of hypopharynx  
14 malignant tumor of laryngopharynx  
15 malignant tumour of laryngopharynx  
16 malignant tumor of laryngopharynx  
17 malignant tumour of postcricoid region  
18 malignant tumor of postcricoid region  
19 malignant tumour of pharyngo-oesophageal junction  
20 malignant tumor of pharyngoesophageal junction  
21 malignant tumour of pyriform fossa  
22 malignant tumor of pyriform fossa  
23 malignant tumour of pyriform sinus  
24 malignant tumor of pyriform sinus  
25 malignant tumour of oesophagus  
26 malignant tumor of esophagus  
27 cancer of oesophagus  
28 ca - cancer of oesophagus  
29 cancer of esophagus  
30 ca - cancer of esophagus  
31 esophageal cancer  
32 malignant neoplasm of esophagus  
33 malignant tumour of duodenum  
34 duodenal cancer  
35 malignant tumour of jejunum  
36 malignant tumor of jejunum  
37 malignant tumor of ileum  
38 malignant tumor of colon  
39 ca - cancer of colon  
40 cancer of colon  
41 malignant tumour of hepatic flexure  
42 hepatic flexure colon cancer  
43 malignant tumor of transverse colon  
44 transverse colon cancer  
45 malignant tumour of descending colon  
46 descending colon cancer  
47 malignant tumor of sigmoid colon  
48 sigmoid colon cancer  
49 malignant tumour of appendix  
50 malignant tumor of appendix  
51 malignant tumor of ascending colon

1 ascending colon cancer  
2 malignant tumour of splenic flexure  
3 malignant tumor of splenic flexure  
4 splenic flexure colon cancer  
5 malignant tumor of rectosigmoid junction  
6 rectosigmoid colon cancer  
7 malignant tumour of biliary tract  
8 malignant tumor of biliary tract  
9 malignant tumor of extrahepatic bile duct  
10 extrahepatic bile duct cancer  
11 malignant tumour of ampulla of vater  
12 malignant tumor of ampulla of vater  
13 malignant tumor of pancreas  
14 ca - cancer of pancreas  
15 pancreatic cancer  
16 ca - pancreatic cancer  
17 malignant tumour of head of pancreas  
18 ca head of pancreas  
19 malignant retroperitoneal tumour  
20 malignant retroperitoneal tumor  
21 cancer of omentum  
22 ca - cancer of omentum  
23 malignant tumour of nasal cavity  
24 malignant tumor of nasal cavity  
25 malignant tumour of nasal septum  
26 malignant tumor of nasal septum  
27 malignant tumour of mastoid air cells  
28 malignant tumor of mastoid air cells  
29 malignant tumour of maxillary sinus  
30 malignant tumor of maxillary sinus  
31 malignant tumour of maxillary antrum  
32 malignant tumor of maxillary antrum  
33 malignant tumour of ethmoid sinus  
34 malignant tumor of ethmoid sinus  
35 malignant tumour of frontal sinus  
36 malignant tumor of frontal sinus  
37 malignant tumour of sphenoid sinus  
38 malignant tumor of sphenoid sinus  
39 malignant tumor of larynx  
40 ca - cancer of larynx  
41 laryngeal cancer  
42 cancer of larynx  
43 malignant tumour of subglottis  
44 malignant tumor of subglottis  
45 malignant tumor of laryngeal cartilage  
46 malignant tumour of trachea  
47 malignant tumor of trachea  
48 tracheal cancer  
49 ca - cancer of trachea  
50 malignant tracheal tumor

1 malignant tracheal tumour  
2 malignant tumor of pleura  
3 cancer of pleura  
4 ca - cancer of pleura  
5 malignant tumour of thymus  
6 malignant tumor of thymus  
7 malignant tumor of heart  
8 malignant tumour of endocardium  
9 malignant tumor of endocardium  
10 malignant tumour of myocardium  
11 malignant tumor of myocardium  
12 malignant tumour of vertebral column  
13 malignant tumor of vertebral column  
14 ca - cancer of spine  
15 cancer of spine  
16 malignant neoplasm of spine  
17 malignant tumour of soft tissue of head  
18 malignant tumor of soft tissue of head  
19 malignant tumour of soft tissue of face  
20 malignant tumor of soft tissue of face  
21 malignant tumour of soft tissue of neck  
22 malignant tumor of soft tissue of neck  
23 malignant tumor of ovary  
24 ca - cancer of ovary  
25 ovarian cancer  
26 malignant tumour of fallopian tube  
27 malignant tumor of fallopian tube  
28 malignant tumor of vagina  
29 cancer of vagina  
30 malignant tumor of testis  
31 malignant tumour of foreskin  
32 malignant tumor of foreskin  
33 malignant tumour of prepuce  
34 malignant tumor of prepuce  
35 cancer of foreskin  
36 malignant neoplasm of foreskin  
37 malignant tumour of glans penis  
38 malignant tumor of glans penis  
39 cancer of glans penis  
40 malignant tumour of epididymis  
41 malignant tumor of epididymis  
42 malignant tumour of spermatic cord  
43 malignant tumor of spermatic cord  
44 spermatic cord ca  
45 malignant tumour of scrotum  
46 malignant tumor of scrotum  
47 malignant scrotal tumour  
48 malignant scrotal tumor  
49 ca - cancer of scrotum  
50 cancer of scrotum  
51



1 scrotal ca  
2 malignant tumour of urachus  
3 malignant tumor of urachus  
4 malignant tumor of renal pelvis  
5 malignant tumour of ureter  
6 cancer of ureter  
7 ureter ca  
8 malignant tumour of urethra  
9 malignant tumor of urethra  
10 malignant urethral tumour  
11 malignant urethral tumor  
12 urethral ca  
13 ca - cancer of urethra  
14 malignant tumour of paraurethral gland  
15 malignant tumor of paraurethral gland  
16 malignant neoplasm of paraurethral gland  
17 malignant tumour of eye  
18 malignant tumor of eye  
19 malignant tumour of orbit  
20 malignant tumor of orbit  
21 malignant orbital tumour  
22 malignant orbital tumor  
23 malignant tumour of conjunctiva  
24 malignant tumor of conjunctiva  
25 malignant tumour of cornea  
26 malignant tumor of cornea  
27 malignant tumour of retina  
28 malignant tumor of retina  
29 malignant retinal tumour  
30 malignant retinal tumor  
31 malignant tumour of choroid  
32 malignant tumor of choroid  
33 cancer of the cerebral meninges  
34 malignant tumour of spinal cord  
35 malignant tumor of spinal cord  
36 malignant tumour of thyroid gland  
37 thyroid cancer  
38 thyroid ca  
39 malignant tumour of parathyroid gland  
40 malignant tumor of parathyroid gland  
41 parathyroid cancer  
42 malignant tumour of pituitary gland  
43 malignant tumor of pituitary gland  
44 cancer of pituitary gland  
45 ca - cancer of pituitary gland  
46 pituitary cancer  
47 malignant tumour of pineal gland  
48 malignant tumor of pineal gland  
49 pineal cancer  
50 cancer of pineal gland

1 malignant tumour of pelvis  
2 malignant tumor of pelvis  
3 malignant tumor of neck  
4 malignant tumour of anus  
5 malignant tumor of anus  
6 malignant tumour of cloacogenic zone  
7 malignant tumor of cloacogenic zone  
8 malignant tumour of peritoneum  
9 malignant tumor of peritoneum  
10 peritoneal cancer  
11 ca - cancer of peritoneum  
12 cancer of peritoneum  
13 malignant tumour of mediastinum  
14 malignant neoplasm of mediastinum  
15 malignant mediastinal tumor  
16 malignant mediastinal tumour  
17 malignant tumor of meninges  
18 malignant tumour of optic nerve  
19 malignant tumor of optic nerve  
20 malignant tumor of spleen  
21 malignant tumor of axilla  
22 malignant tumour of upper limb  
23 malignant tumor of upper limb  
24 malignant tumor of lower limb  
25 malignant tumour of oral cavity  
26 malignant tumor of oral cavity  
27 malignant tumour of mouth  
28 malignant tumor of mouth  
29 cancer of oral cavity  
30 ca - mouth cancer  
31 mouth cancer  
32 malignant neoplasm of mouth  
33 malignant tumour of nasal sinuses  
34 malignant tumor of nasal sinuses  
35 malignant tumour of pharynx  
36 malignant tumor of pharynx  
37 cancer of pharynx  
38 ca - cancer of pharynx  
39 malignant neoplasm of pharynx  
40 malignant tumor of intestine  
41 cancer of intestine  
42 malignant neoplasm of intestine  
43 ca - cancer of intestine  
44 intestinal cancer  
45 ca - cancer of bowel  
46 malignant tumour of small intestine  
47 malignant tumour of small bowel  
48 malignant tumor of small bowel  
49 malignant tumor of female genital organ  
50 malignant tumour of male genital organ

1 malignant tumor of penis  
2 cancer of penis  
3 penile ca  
4 ca penis  
5 ca - cancer of penis  
6 malignant tumor of kidney  
7 renal malignant tumour  
8 renal malignant tumor  
9 ca - renal cancer  
10 ca - cancer of kidney  
11 renal cancer  
12 navigational concept  
13 cancer care plan given  
14 referred to cancer primary healthcare multidisciplinary team  
15 malignant neoplasm (morphology)  
16 malignant neoplasm of primary, secondary, or uncertain origin  
17 gleason score 2-4: well differentiated  
18 gleason score 8-10: poorly differentiated  
19 dysplasia of vulva  
20 malignant tumour of adrenal cortex  
21 malignant tumor of adrenal cortex  
22 malignant tumour of adrenal medulla  
23 malignant tumor of adrenal medulla  
24 malignant tumour of body of uterus  
25 malignant tumor of body of uterus  
26 body of uterus ca  
27 malignant tumour of uterus  
28 malignant tumor of uterus  
29 ca - cancer of uterus  
30 cancer of uterus  
31 uterine cancer  
32 clitoral ca  
33 malignant tumour of endocrine gland  
34 malignant tumor of endocrine gland  
35 malignant tumour of nervous system  
36 malignant tumor of nervous system  
37 female breast cancer  
38 cancer of female breast  
39 ca main bronchus  
40 primary malignant neoplasm  
41 ca breast - male  
42 ca cervix uteri - endocervix  
43 cancer of exocervix  
44 malignant neoplasm of skin head and neck  
45 ca skin - head/neck  
46 ca skin - trunk  
47 skin cancer  
48 cancer of skin  
49 primary malignant neoplasm of gallbladder  
50 sarcoma - category

1 reticulum cell sarcoma  
2  
3 siewert type ii adenocarcinoma  
4 siewert type iii adenocarcinoma  
5 siewert type i adenocarcinoma  
6 drugs used in malignant disease and immunosuppression  
7 malignant multiple sclerosis  
8 endoscopic extirpation of bladder lesion  
9 transurethral resection of bladder neoplasm  
10 turt - transurethral resection of bladder tumour  
11 transurethral resection of bladder tumour  
12 turbt - transurethral resection of bladder tumor  
13 turt - transurethral resection of bladder tumor  
14 transurethral resection of bladder tumor  
15 epithelioma  
16 neoplasm of soft tissue  
17 tumour of soft tissue  
18 soft tissue tumour  
19 soft tissue tumor  
20 tumor of soft tissue  
21 neoplasm of soft tissues  
22 neoplasm of endocrine gland  
23 tumour of endocrine gland  
24 tumor of endocrine gland  
25 neoplasm of endocrine system  
26 tumour of endocrine system  
27 tumor of endocrine system  
28 exam for ? neoplasm  
29 excision malignant skin tumour  
30 tumor marker monitoring  
31 cancer diagnosis discussed with partner in relationship  
32 ca care plan discussed with pt  
33 cancer care plan discussed with partner in relationship  
34 erythroplasia of queyrat  
35 paget's disease of penis  
36 queyrat erythroplasia  
37 malignant tumor of prostate  
38 malignant prostatic tumour  
39 malignant prostatic tumor  
40 ca - cancer of prostate  
41 cancer of prostate  
42 malignant tumour of urinary bladder  
43 malignant tumor of urinary bladder  
44 bladder cancer  
45 ca - bladder cancer  
46 vulval intraepithelial neoplasia (vin)  
47 leiomyomatous neoplasm - category  
48 soft tissue tumour of smooth muscle differentiation  
49 rhabdomyomatous neoplasm - category  
50 soft tissue tumour of skeletal muscle differentiation  
51 fibrohistiocytic neoplasm - category  
52  
53  
54  
55  
56  
57  
58  
59  
60

1  
2 leiomyosarcoma - category  
3 vascular neoplasm of skin  
4 cutaneous vascular tumour  
5 pseudosarcomatous fasciitis  
6 squamous cell carcinoma - category  
7 squamous neoplasm of surface epithelium  
8 melanotic macule  
9 malignant peripheral nerve sheath tumour  
10 malignant peripheral nerve sheath tumor  
11 neurofibrosarcoma  
12 malignant schwannoma  
13 digital myxoid cyst  
14 sex hormones and antagonists in malignant disease  
15 widespread metastatic malignant neoplastic disease  
16 generalised cancer  
17 generalised malignancy  
18 generalized malignancy  
19 generalized cancer  
20 disseminated cancer  
21 malignant neoplasm, disseminated  
22 ca - disseminated cancer  
23 nettle's syndrome  
24 neoplasm screen excl. cervical  
25 neoplasm uncert / unkn behav brain, infratentorial  
26 neoplasms  
27 neoplasm of unspec nature of bone, skin or soft tissue nos  
28 neoplasm of unspecified nature nos  
29 neop unspec nature of endocrine glands, other nervous system  
30 neopl uncert/unkn behav of periph nerves & autonom nerv sys  
31 neo/uncertn+unknwn behav/lymph,h'matopetc+rel tiss,unspcf  
32 myopathy due to malignant disease  
33 breast cancer 1, early onset gene mutation positive  
34 breast cancer 1, early onset gene mutation negative  
35 breast cancer 2, early onset gene mutation positive  
36 breast cancer 2, early onset gene mutation negative  
37 cancer emotional and psychosocial support and education  
38 mast cell neoplasm  
39 mature (peripheral) t-cell neoplasm  
40 estrogen receptor positive tumor  
41 progesterone receptor positive tumor  
42 chorioadenoma  
43 chorioadenoma destruens  
44 im - invasive mole  
45 invasive mole  
46 malignant teratoma of undescended testis  
47 malignant teratoma of descended testis  
48 sex cord-stromal tumour category  
49 sex cord-stromal tumor category  
50 malignant tumor of urinary system  
51 gastrointestinal stromal tumor

1  
2 gist - gastrointestinal stromal tumor  
3 gist - gastrointestinal stromal tumour  
4 gastrointestinal stromal sarcoma  
5 kaposi sarcoma associated with aids  
6 kaposi's sarcoma associated with acquired immunodeficiency syndrome  
7 multiple endocrine adenomatosis  
8 malignant tumor of vermilion border of lip  
9 moderate vulvar dysplasia  
10 idiopathic hypereosinophilic syndrome  
11 idiopathic hypereosinophilic syndrome (hes)  
12 mild vulvar dysplasia  
13 metastases of respiratory and/or digestive systems  
14 mesothelioma of pleura  
15 malignant neoplasm of thoracic cavity structure  
16 intrathoracic malignant neoplasm  
17 phyllodes tumour - category  
18 phyllodes tumor - category  
19 implantation of carmustine wafer into cerebrum  
20 excisional biopsy of basal cell carcinoma  
21 resection of tumor of heart  
22 resection of tumour of heart  
23 melanoma in situ of ear and external auricular canal  
24 melanoma in situ of lower limb, including hip  
25 melanoma in situ of other and unspecified parts of face  
26 melanoma in situ of upper limb, including shoulder  
27 melanoma in situ, unspecified  
28 uterine body tumour in pregnancy/childbirth/puerperium nos  
29 uterine fibroid - baby delivered + postpartum complication  
30 uterine fibroid complicating a/n care, baby not delivered  
31 uterine fibroid in pregnancy/childbirth/puerperium nos  
32 bowel cancer screening programme: faecal occult blood result  
33 mast cell disease  
34 mast cell malignancy of lymph nodes inguinal region and leg  
35 mastocytoma nos  
36 malignant neoplasm of frontal sinus  
37 malignant neoplasm, overlapping lesion of major saliv gland  
38 malignant neoplasm, overlap lesion periph nerve & auton ns  
39 malignant neoplasm-pluriglandular involvement,unspecified  
40 malignant neoplasm/bones+articular cartilage/limb,unspfd  
41 malignant neoplasm/overlap lesion/bone+articulr cartilage  
42 malignant neoplasm/overlapping lesion/feml genital organs  
43 malignant neoplasm/peripheral nerves of trunk,unspecified  
44 malignant reticuloendotheliosis  
45 malignant neoplasm of vertebral column  
46 malignant neoplasm other gallbladder/extrahepatic bile duct  
47 malignant neoplasm other spec digestive tract and peritoneum  
48 malignant neoplasm overlapping lesion of skin  
49 malignant neoplasm pituitary gland and craniopharyngeal duct  
50 malignant neoplasm posterior margin nasal septum and choanae  
51 malignant neoplasm rectum,rectosigmoid junction and anus nos

1 malignant neoplasm skin of ear and external auricular canal  
2 malignant neoplasm skin of other and unspecified parts face  
3 malignant neoplasm skin other and unspec part of face nos  
4 malignant neoplasm, overlap les bone and artic cart of limbs  
5 malignant neoplasm, overlap lesion connective & soft tissue  
6 malignant neoplasm, overlap lesion of resp & intrathor orgs  
7 malignant neoplasm, overlapping lesion male genital orgs  
8 malignant neoplasm, overlapping lesion of brain  
9 malignant neoplasm of upper gum  
10 malignant neoplasm of upper lip, buccal aspect  
11 malignant neoplasm of upper lip, external  
12 malignant neoplasm of urachus  
13 malignant neoplasm of ureter  
14 malignant neoplasm of urethra  
15 malignant neoplasm of uvula  
16 malignant neoplasm of vagina  
17 malignant neoplasm of sweat gland  
18 malignant neoplasm of testis  
19 malignant neoplasm of thymus  
20 malignant neoplasm of thyroid gland  
21 malignant neoplasm of tongue  
22 malignant neoplasm of tonsil  
23 malignant neoplasm of tonsillar fossa  
24 malignant neoplasm of trachea  
25 malignant neoplasm of transverse colon  
26 malignant neoplasm of vallecula  
27 malignant neoplasm of small intestine and duodenum  
28 malignant neoplasm of soft palate  
29 malignant neoplasm of spermatic cord  
30 malignant neoplasm of sphenoidal sinus  
31 malignant neoplasm of spinal cord  
32 malignant neoplasm of splenic flexure of colon  
33 malignant neoplasm of stomach  
34 malignant neoplasm of subglottis  
35 malignant neoplasm of sublingual gland  
36 malignant neoplasm of septum of nose  
37 malignant neoplasm of sigmoid colon  
38 malignant neoplasm of prepylorus of stomach  
39 malignant neoplasm of prostate  
40 malignant neoplasm of pyriform sinus  
41 malignant neoplasm of rectosigmoid junction  
42 malignant neoplasm of renal calyces  
43 malignant neoplasm of renal pelvis  
44 malignant neoplasm of retained testis  
45 malignant neoplasm of retina  
46 malignant neoplasm of retromolar area  
47 postoperative follow-up visit  
48 malignant neoplasm of pelvis  
49 malignant neoplasm of peripheral nerve of low limb, incl hip  
50 malignant neoplasm of peripheral nerve, upp limb, incl should

1 malignant neoplasm of peripheral nerves of head, face & neck  
2 malignant neoplasm of pineal gland  
3 malignant neoplasm of pituitary gland  
4 malignant neoplasm of pleura  
5 malignant neoplasm of postcricoid region  
6 malignant neoplasm of scrotum  
7 malignant neoplasm of other specified site small intestine  
8 malignant neoplasm of ovary  
9 malignant neoplasm of overlapping lesion of bronchus & lung  
10 malignant neoplasm of overlapping lesion of tonsil  
11 malignant neoplasm of overlapping lesion of vulva  
12 malignant neoplasm of palatopharyngeal arch  
13 malignant neoplasm of pancreas  
14 malignant neoplasm of parathyroid gland  
15 malignant neoplasm of paraurethral glands  
16 malignant neoplasm of parotid gland  
17 malignant neoplasm of orbit  
18 malignant neoplasm of oropharynx  
19 malignant neoplasm of other and ill defined site nos  
20 malignant neoplasm of other and unspecified site os  
21 malignant neoplasm of other sites lip, oral cavity, pharynx  
22 malignant neoplasm of metatarsal bones of foot  
23 malignant neoplasm of myocardium  
24 malignant neoplasm of lower gum  
25 malignant neoplasm of lower lip, mucosa  
26 malignant neoplasm of lower lip, oral aspect  
27 malignant neoplasm of lower lip, vermilion border  
28 oestrogen receptor negative neoplasm  
29 estrogen receptor negative neoplasm  
30 progesterone receptor negative neoplasm  
31 malignant neoplasm of mastoid air cells  
32 malignant neoplasm of maxillary sinus  
33 malignant neoplasm of mediastinum, part unspecified  
34 malignant neoplasm of meninges, unspecified  
35 malignant neoplasm of lacrimal duct  
36 malignant neoplasm of laryngeal cartilage  
37 malignant neoplasm of laryngopharynx  
38 malignant neoplasm of larynx  
39 malignant neoplasm of lateral wall of nasopharynx  
40 malignant neoplasm of lingual tonsil  
41 malignant neoplasm of lip  
42 malignant neoplasm of lip unspecified, buccal aspect  
43 malignant neoplasm of hard palate  
44 malignant neoplasm of head of pancreas  
45 malignant neoplasm of heart  
46 malignant neoplasm of hepatic flexure of colon  
47 malignant neoplasm of histiocytic tissue  
48 malignant neoplasm of hypopharynx  
49 malignant neoplasm of ileum  
50 malignant neoplasm of jejunum



1 malignant neoplasm of floor of mouth  
2 malignant neoplasm of gallbladder  
3 malignant neoplasm of genitourinary organ os  
4 malignant neoplasm of glans penis  
5 malignant neoplasm of glossopalatine fold  
6 malignant neoplasm of gum  
7 malignant neoplasm of descending colon  
8 malignant neoplasm of duodenum  
9 malignant neoplasm of endocardium  
10 papillary neoplasm  
11 papillary tumor  
12 papillary tumour  
13 malignant neoplasm of epididymis  
14 malignant neoplasm of extrahepatic bile ducts  
15 malignant neoplasm of eyelid including canthus  
16 malignant neoplasm of fallopian tube  
17 malignant neoplasm of colon  
18 malignant neoplasm of commissure of lip  
19 malignant neoplasm of common bile duct  
20 malignant neoplasm of conjunctiva  
21 malignant neoplasm of cornea  
22 malignant neoplasm of costo-vertebral joint  
23 malignant neoplasm of cranial nerves  
24 malignant neoplasm of cheek mucosa  
25 malignant neoplasm of choroid  
26 malignant neoplasm of skin of face  
27 malignant neoplasm of appendix  
28 malignant neoplasm of ascending colon  
29 malignant neoplasm of base of tongue  
30 malignant neoplasm of brain stem  
31 malignant neoplasm of brain stem nos  
32 malignant neoplasm of branchial cleft  
33 malignant neoplasm of buccal mucosa  
34 ependymoma - category  
35 malignant melanoma of upper limb and shoulder  
36 malignant neoplasm aryepiglottic fold, hypopharyngeal aspect  
37 malignant neoplasm cerebrum (excluding lobes and ventricles)  
38 malignant neoplasm gallbladder and extrahepatic bile ducts  
39 malignant neoplasm gallbladder/extrahepatic bile ducts nos  
40 malignant neoplasm of acoustic nerve  
41 malignant neoplasm of ampulla of vater  
42 oligodendroglioma - category  
43 seminoma - category  
44 malignant melanoma of eyelid including canthus  
45 malig neopl of connective and soft tissue - sacrum or coccyx  
46 malig neopl peripheral nerves and autonomic nervous system  
47 malig neopl, overlap lesion brain & other part of cns  
48 malig neoplasm of connective and soft tissues of lumb spine  
49 malig neoplasm of connective and soft tissues of thor spine  
50 malig neop connective and soft tissue other specified site  
51  
52  
53  
54  
55  
56  
57  
58  
59  
60

1 malig neop connective and soft tissue upper limb/shoulder  
2 malig neop connective soft tissue upper limb/shoulder nos  
3 malig neop eyeball excl conjunctiva, cornea, retina, choroid  
4 malig neop nasal cavities, middle ear and accessory sinuses  
5 malig neop of bone, connective tissue, skin and breast  
6 malig neop of bone, connective tissue, skin and breast nos  
7 malig neop of bone, connective tissue, skin and breast os  
8 malig neop of connective and soft tissue head, face and neck  
9 malig neop of connective and soft tissue of abdomen nos  
10 malig neop of connective and soft tissue of abdominal wall  
11 malig neop of connective and soft tissue of great toe  
12 malig neop of connective and soft tissue of hip and leg  
13 malig neop of connective and soft tissue of inguinal region  
14 malig neop of connective and soft tissue of lower leg  
15 malig neop of connective and soft tissue of pelvis nos  
16 malig neop of connective and soft tissue of thorax nos  
17 malig neop of connective and soft tissue thigh and upper leg  
18 malig neop of connective and soft tissue trunk unspecified  
19 malig neop of endocrine gland or related structure nos  
20 malig neop of kidney and other unspecified urinary organs  
21 malig neop of other and unspecified female genital organs  
22 malig neop of other and unspecified parts of nervous system  
23 malig neop of other endocrine glands and related structures  
24 malig neop of other site of heart, thymus and mediastinum  
25 malig neop of respiratory tract and intrathoracic organs  
26 malig neop of scapula and long bones of upper arm nos  
27 malig neop of upper respiratory tract, part unspecified  
28 malig neop oth/ill-defined sites digestive tract/peritoneum  
29 screening for skin cancer  
30 malig neop other site nasal cavity, middle ear and sinuses  
31 malig neop other site rectum, rectosigmoid junction and anus  
32 malig neop other/ill-defined sites lip, oral cavity, pharynx  
33 malig neop other/ill-defined sites resp/intrathoracic organs  
34 malig neop skin of ear and external auricular canal nos  
35 malig neo, overlapping lesion of heart, mediastinum & pleura  
36 malig neop auditory tube, middle ear and mastoid air cells  
37 malig neop auditory tube, middle ear, mastoid air cells nos  
38 malig neop connective and soft tissue head, face, neck nos  
39 malig neop pituitary gland or craniopharyngeal duct nos  
40 malig neop connective and soft tissue hip and leg nos  
41 malig neop connective and soft tissue of popliteal space  
42 mal neoplasm/periph nerves+autonomic nervous system,unspc  
43 lymph node metastases  
44 sarcoma of dendritic cells (accessory cells)  
45 lung neoplasm screen  
46 lung cancer  
47 no response to bowel cancer screening programme invitation  
48 cancer of carotid body  
49 curettage of lesion of bone and grafting of bone  
50 carcinoma of cheek

1 malignant epithelial neoplasm of cheek  
2 cancer of urinary organ  
3 cancer of mandible  
4 cancer of posterior mediastinum  
5 cancer of parametrium  
6 tumour of respiratory system  
7 neoplasm of respiratory system  
8 tumor of respiratory system  
9 cancer of lateral wall of oropharynx  
10 cancer of parietal pleura  
11 cancer of respiratory system  
12 cancer of anterior mediastinum  
13 cancer of visceral pleura  
14 cancer of pelvic peritoneum  
15 cancer of cerebellum  
16 malignant neoplasm of long bone of lower limb  
17 liver metastases  
18 urinary neoplasm screen  
19 excision of tumour of bone  
20 patient advised about prostate cancer screening  
21 advice given about bowel cancer screening programme  
22 kaposi's sarcoma of multiple organs  
23 kaposi's sarcoma, unspecified  
24 renal cell carcinoma  
25 encapsulated papillary carcinoma  
26 encysted papillary carcinoma  
27 non-infiltrating intracystic carcinoma  
28 noninfiltrating intracystic carcinoma  
29 intracystic papillary carcinoma  
30 intracystic papillary adenocarcinoma  
31 malignant neoplasm of chest wall  
32 primary malignant neoplasm of placenta  
33 comedocarcinoma, no international classification of diseases for oncology subtype  
34 comedocarcinoma, no icd-o subtype  
35 gastric neoplasm  
36 did not attend cancer clinic  
37 dna (did not attend) cancer clinic  
38 general practitioner out of hours service notified of cancer care plan  
39 gp (general practitioner) ooh (out of hours) service notified of cancer care plan  
40 under care of cancer primary healthcare multidisciplinary team  
41 unspec cystoscopy and transurethral resection bladder lesion  
42 grade 1 (stage pta) papillary urothelial/transitional cell carcinoma  
43 grade 2 (stage pta) papillary urothelial/transitional cell carcinoma  
44 grade 3 (stage pta) papillary urothelial/transitional cell carcinoma  
45 special screening examination for neoplasm of intestinal tract  
46 histiocytic tumour nos  
47 hiv dis reslt/oth mal neopl/lymph,h'matopoetc+reltd tissu  
48 hiv disease resulting in kaposi's sarcoma  
49 hiv disease resulting in unspecified malignant neoplasm  
50 tumour marker levels

1 tumour of uterine body - baby delivered + p/n complication  
2 tumour of uterine body complic p/n care, baby prev delivered  
3 tumour of uterine body complicating a/n care, baby not deliv  
4 tumour of uterine body in pregnancy/childbirth/puerperium  
5 cancer of bowel  
6 clark melanoma level 2  
7 gleason grading of prostate cancer  
8 basal cell carcinoma  
9 rodent ulcer  
10 excision melanoma  
11 lung tumour excision  
12 open bladder tumour fulgurat.  
13 open bladder tumour resection  
14 tur: bladder excision nos  
15 tur:bladder papilloma excision  
16 clear bladder transurethrally  
17 intramuscular drug injection  
18 caustic injected into tumour  
19 cytotoxic given orally  
20 lip carcinoma  
21 tongue carcinoma  
22 ca major salivary gland  
23 ca gum, + rest of mouth  
24 ca oro/naso/hypopharynx  
25 ca lip, oral, pharynx nos  
26 ca lesser curvature - stomach  
27 ca greater curvature - stomach  
28 ca rectum + ca anus  
29 ca anus  
30 ca rectum + ca anus nos  
31 ca liver/biliary system  
32 ca intrahepatic bile ducts  
33 ca liver/biliary system nos  
34 ca gall bladder  
35 ca larynx - nos  
36 ca trachea/bronchus/lung nos  
37 ca trachea/bronchus/lung  
38 ca upper lobe bronchus/lung  
39 ca middle lobe bronchus/lung  
40 ca lower lobe bronchus/lung  
41 ca bone/articular cartilage  
42 ca skull/face/jaw bone  
43 ca upper limb bones/scapula  
44 ca lower limb bones  
45 ca bone/joint cartilage nos  
46 melanoma of skin  
47 melanoma - head/neck  
48 melanoma - trunk  
49 melanoma - upper limb  
50 melanoma - lower limb

1  
2 melanoma of skin nos  
3 ca skin - other  
4 ca skin - trunk  
5 ca skin - upper limb  
6 ca skin - lower limb  
7 ca skin - other nos  
8 carcinoma breast  
9 ca breast - nipple/central  
10 ca breast-upper,inner quadrant  
11 ca breast-lower,inner quadrant  
12 ca breast-upper,outer quadrant  
13 ca breast-lower,outer quadrant  
14 ca breast - axillary tail  
15 ca breast - nos  
16 ca breast - male  
17 carcinoma genital organs  
18 ca cervix uteri - endocervix  
19 ca cervix uteri - exocervix  
20 carcinoma body of uterus  
21 ca uterus nos  
22 ca ovary/uterine adnexa nos  
23 ca vulva  
24 ca penis  
25 ca epididymis/spermatic cord  
26 carcinoma bladder  
27 ca kidney/other urinary organs  
28 ca kidney  
29 ca kidney/urinary organs nos  
30 ca genital organs nos  
31 ca - unspecified site nos  
32 ca cerebrum  
33 ca thyroid  
34 other primary ca nos  
35 other primary carcinomas  
36 ca skin - head/neck  
37 ca lymph nodes - secondary  
38 secondary nodes - head/neck  
39 secondary nodes -intrathoracic  
40 secondary nodes - intra.abdom.  
41 secondary nodes - axilla/arm  
42 secondary nodes - inguinal/leg  
43 secondary nodes - intrapelvic  
44 secondary nodes - multiple  
45 secondary nodes nos  
46 secondary ca git  
47 secondary ca lung  
48 secondary ca liver  
49 secondary ca - specified sites  
50 secondary ca kidney  
51 secondary ca skin

1 secondary ca brain/spinal cord  
2 secondary ca ovary  
3 secondary ca nos  
4 disseminated ca -unspecif site  
5 ca - unspecified site  
6 carcinoma in situ breast  
7 carcinoma in situ cervix uteri  
8 ca in situ bladder - papilloma  
9 hydatidiform mole - malignant  
10 unspecified neoplasms nos  
11 unspecified neoplasms  
12 tumour nos  
13 malignant neoplasm nos  
14 malignant neoplasms  
15 metastatic carcinoma  
16 other neoplasms  
17 tumour of uterine body  
18 osteitis deformans - paget's  
19 sternocleidomastoid anomaly  
20 [rfc] cancer of the prostate  
21 [rfc] cancer of the rectum  
22 [rfc] cancer of the testes  
23 [rfc] cancer of the ovary  
24 [rfc] cancer of the uterus  
25 [rfc] cancer of the cervix  
26 [rfc] cancer of the vagina & vulva  
27 [rfc] lung cancer  
28 [rfc] cancer of the larynx  
29 [rfc] neoplasm  
30 [rfc] bowel cancer  
31 [rfc] breast cancer  
32 [rfc] cancer of the thyroid  
33 [rfc] cancer of the eye  
34 [rfc] cancer of the stomach  
35 [rfc] liver cancer  
36 [rfc] cancer of the oesophagus  
37 [rfc] cancer of the mouth  
38 [rfc] neoplasm  
39 [rfc] cancer  
40 [rfc] malignant wound  
41 [rfc] cancer prevention  
42 [v]ph of cervical intraepithelial neoplasia, grade i  
43 [v]ph of cervical intraepithelial neoplasia grade ii  
44 [v]ph of cervical intraepithelial neoplasia, grade iii  
45 transitional cell ca bladder  
46 hypereosinophilic syndrome  
47 transurethral bladder excision  
48 adenocarcinoma of rectum  
49 cancer medication review  
50 cancer review administration

1  
2 cancer review invite 1  
3 cancer review invite 2  
4 cancer review invite 3  
5 transitional cell papilloma of bladder  
6 lethal midline granuloma  
7 malignant neoplasm of endometrium  
8 recurrence of cancer confirmed  
9 cytotoxic bladder instillation  
10 secondary ca git  
11 ca - unspecified site  
12 disseminated ca -unspecif site  
13 malignant neoplasm nos  
14 sternocleidomastoid anomaly  
15 melanoma of skin nos  
16 ca skin - other nos  
17 ca breast - nos  
18 ca uterus nos  
19 unspecified neoplasms nos  
20  
21  
22  
23  
24  
25  
26  
27  
28  
29  
30  
31  
32  
33  
34  
35  
36  
37  
38  
39  
40  
41  
42  
43  
44  
45  
46  
47  
48  
49  
50  
51  
52  
53  
54  
55  
56  
57  
58  
59  
60

For peer review only

| ICD-10 code | Term                                                                           |
|-------------|--------------------------------------------------------------------------------|
| C00.0       | Malignant neoplasm: External upper lip                                         |
| C00.1       | Malignant neoplasm: External lower lip                                         |
| C00.2       | Malignant neoplasm: External lip, unspecified                                  |
| C00.3       | Malignant neoplasm: Upper lip, inner aspect                                    |
| C00.4       | Malignant neoplasm: Lower lip, inner aspect                                    |
| C00.5       | Malignant neoplasm: Lip, unspecified, inner aspect                             |
| C00.6       | Malignant neoplasm: Commissure of lip                                          |
| C00.8       | Malignant neoplasm: Overlapping lesion of lip                                  |
| C00.9       | Malignant neoplasm: Lip, unspecified                                           |
| C01         | Malignant neoplasm of base of tongue                                           |
| C02.0       | Malignant neoplasm: Dorsal surface of tongue                                   |
| C02.1       | Malignant neoplasm: Border of tongue                                           |
| C02.2       | Malignant neoplasm: Ventral surface of tongue                                  |
| C02.3       | Malignant neoplasm: Anterior two-thirds of tongue, part unspecified            |
| C02.4       | Malignant neoplasm: Lingual tonsil                                             |
| C02.8       | Malignant neoplasm: Overlapping lesion of tongue                               |
| C02.9       | Malignant neoplasm: Tongue, unspecified                                        |
| C03.0       | Malignant neoplasm: Upper gum                                                  |
| C03.1       | Malignant neoplasm: Lower gum                                                  |
| C03.9       | Malignant neoplasm: Gum, unspecified                                           |
| C04.0       | Malignant neoplasm: Anterior floor of mouth                                    |
| C04.1       | Malignant neoplasm: Lateral floor of mouth                                     |
| C04.8       | Malignant neoplasm: Overlapping lesion of floor of mouth                       |
| C04.9       | Malignant neoplasm: Floor of mouth, unspecified                                |
| C05.0       | Malignant neoplasm: Hard palate                                                |
| C05.1       | Malignant neoplasm: Soft palate                                                |
| C05.2       | Malignant neoplasm: Uvula                                                      |
| C05.8       | Malignant neoplasm: Overlapping lesion of palate                               |
| C05.9       | Malignant neoplasm: Palate, unspecified                                        |
| C06.0       | Malignant neoplasm: Cheek mucosa                                               |
| C06.1       | Malignant neoplasm: Vestibule of mouth                                         |
| C06.2       | Malignant neoplasm: Retromolar area                                            |
| C06.8       | Malignant neoplasm: Overlapping lesion of other and unspecified parts of mouth |
| C06.9       | Malignant neoplasm: Mouth, unspecified                                         |
| C07         | Malignant neoplasm of parotid gland                                            |
| C08.0       | Malignant neoplasm: Submandibular gland                                        |
| C08.1       | Malignant neoplasm: Sublingual gland                                           |
| C08.8       | Malignant neoplasm: Overlapping lesion of major salivary glands                |
| C08.9       | Malignant neoplasm: Major salivary gland, unspecified                          |
| C09.0       | Malignant neoplasm: Tonsillar fossa                                            |
| C09.1       | Malignant neoplasm: Tonsillar pillar (anterior)(posterior)                     |
| C09.8       | Malignant neoplasm: Overlapping lesion of tonsil                               |
| C09.9       | Malignant neoplasm: Tonsil, unspecified                                        |
| C10.0       | Malignant neoplasm: Vallecula                                                  |
| C10.1       | Malignant neoplasm: Anterior surface of epiglottis                             |
| C10.2       | Malignant neoplasm: Lateral wall of oropharynx                                 |
| C10.3       | Malignant neoplasm: Posterior wall of oropharynx                               |
| C10.4       | Malignant neoplasm: Branchial cleft                                            |
| C10.8       | Malignant neoplasm: Overlapping lesion of oropharynx                           |



|    |       |                                                                        |
|----|-------|------------------------------------------------------------------------|
| 1  |       |                                                                        |
| 2  | C10.9 | Malignant neoplasm: Oropharynx, unspecified                            |
| 3  | C11.0 | Malignant neoplasm: Superior wall of nasopharynx                       |
| 4  | C11.1 | Malignant neoplasm: Posterior wall of nasopharynx                      |
| 5  | C11.2 | Malignant neoplasm: Lateral wall of nasopharynx                        |
| 6  | C11.3 | Malignant neoplasm: Anterior wall of nasopharynx                       |
| 7  | C11.8 | Malignant neoplasm: Overlapping lesion of nasopharynx                  |
| 8  | C11.9 | Malignant neoplasm: Nasopharynx, unspecified                           |
| 9  | C12   | Malignant neoplasm of piriform sinus                                   |
| 10 | C13.0 | Malignant neoplasm: Postcricoid region                                 |
| 11 | C13.1 | Malignant neoplasm: Aryepiglottic fold, hypopharyngeal aspect          |
| 12 | C13.2 | Malignant neoplasm: Posterior wall of hypopharynx                      |
| 13 | C13.8 | Malignant neoplasm: Overlapping lesion of hypopharynx                  |
| 14 | C13.9 | Malignant neoplasm: Hypopharynx, unspecified                           |
| 15 | C14.0 | Malignant neoplasm: Pharynx, unspecified                               |
| 16 | C14.2 | Malignant neoplasm: Waldeyer ring                                      |
| 17 | C14.8 | Malignant neoplasm: Overlapping lesion of lip, oral cavity and pharynx |
| 18 | C15.0 | Malignant neoplasm: Cervical part of oesophagus                        |
| 19 | C15.1 | Malignant neoplasm: Thoracic part of oesophagus                        |
| 20 | C15.2 | Malignant neoplasm: Abdominal part of oesophagus                       |
| 21 | C15.3 | Malignant neoplasm: Upper third of oesophagus                          |
| 22 | C15.4 | Malignant neoplasm: Middle third of oesophagus                         |
| 23 | C15.5 | Malignant neoplasm: Lower third of oesophagus                          |
| 24 | C15.8 | Malignant neoplasm: Overlapping lesion of oesophagus                   |
| 25 | C15.9 | Malignant neoplasm: Oesophagus, unspecified                            |
| 26 | C16.0 | Malignant neoplasm: Cardia                                             |
| 27 | C16.1 | Malignant neoplasm: Fundus of stomach                                  |
| 28 | C16.2 | Malignant neoplasm: Body of stomach                                    |
| 29 | C16.3 | Malignant neoplasm: Pyloric antrum                                     |
| 30 | C16.4 | Malignant neoplasm: Pylorus                                            |
| 31 | C16.5 | Malignant neoplasm: Lesser curvature of stomach, unspecified           |
| 32 | C16.6 | Malignant neoplasm: Greater curvature of stomach, unspecified          |
| 33 | C16.8 | Malignant neoplasm: Overlapping lesion of stomach                      |
| 34 | C16.9 | Malignant neoplasm: Stomach, unspecified                               |
| 35 | C17.0 | Malignant neoplasm: Duodenum                                           |
| 36 | C17.1 | Malignant neoplasm: Jejunum                                            |
| 37 | C17.2 | Malignant neoplasm: Ileum                                              |
| 38 | C17.3 | Malignant neoplasm: Meckel diverticulum                                |
| 39 | C17.8 | Malignant neoplasm: Overlapping lesion of small intestine              |
| 40 | C17.9 | Malignant neoplasm: Small intestine, unspecified                       |
| 41 | C18.0 | Malignant neoplasm: Caecum                                             |
| 42 | C18.1 | Malignant neoplasm: Appendix                                           |
| 43 | C18.2 | Malignant neoplasm: Ascending colon                                    |
| 44 | C18.3 | Malignant neoplasm: Hepatic flexure                                    |
| 45 | C18.4 | Malignant neoplasm: Transverse colon                                   |
| 46 | C18.5 | Malignant neoplasm: Splenic flexure                                    |
| 47 | C18.6 | Malignant neoplasm: Descending colon                                   |
| 48 | C18.7 | Malignant neoplasm: Sigmoid colon                                      |
| 49 | C18.8 | Malignant neoplasm: Overlapping lesion of colon                        |
| 50 | C18.9 | Malignant neoplasm: Colon, unspecified                                 |
| 51 | C19   | Malignant neoplasm of rectosigmoid junction                            |

|    |       |                                                                       |
|----|-------|-----------------------------------------------------------------------|
| 1  |       |                                                                       |
| 2  | C20   | Malignant neoplasm of rectum                                          |
| 3  | C21.0 | Malignant neoplasm: Anus, unspecified                                 |
| 4  | C21.1 | Malignant neoplasm: Anal canal                                        |
| 5  | C21.2 | Malignant neoplasm: Cloacogenic zone                                  |
| 6  |       |                                                                       |
| 7  | C21.8 | Malignant neoplasm: Overlapping lesion of rectum, anus and anal canal |
| 8  | C22.0 | Malignant neoplasm: Liver cell carcinoma                              |
| 9  | C22.1 | Malignant neoplasm: Intrahepatic bile duct carcinoma                  |
| 10 | C22.2 | Malignant neoplasm: Hepatoblastoma                                    |
| 11 | C22.3 | Malignant neoplasm: Angiosarcoma of liver                             |
| 12 | C22.4 | Malignant neoplasm: Other sarcomas of liver                           |
| 13 | C22.7 | Malignant neoplasm: Other specified carcinomas of liver               |
| 14 | C22.9 | Malignant neoplasm: Liver, unspecified                                |
| 15 | C23   | Malignant neoplasm of gallbladder                                     |
| 16 | C24.0 | Malignant neoplasm: Extrahepatic bile duct                            |
| 17 |       |                                                                       |
| 18 | C24.1 | Malignant neoplasm: Ampulla of Vater                                  |
| 19 | C24.8 | Malignant neoplasm: Overlapping lesion of biliary tract               |
| 20 | C24.9 | Malignant neoplasm: Biliary tract, unspecified                        |
| 21 | C25.0 | Malignant neoplasm: Head of pancreas                                  |
| 22 | C25.1 | Malignant neoplasm: Body of pancreas                                  |
| 23 | C25.2 | Malignant neoplasm: Tail of pancreas                                  |
| 24 | C25.3 | Malignant neoplasm: Pancreatic duct                                   |
| 25 | C25.4 | Malignant neoplasm: Endocrine pancreas                                |
| 26 | C25.7 | Malignant neoplasm: Other parts of pancreas                           |
| 27 | C25.8 | Malignant neoplasm: Overlapping lesion of pancreas                    |
| 28 | C25.9 | Malignant neoplasm: Pancreas, unspecified                             |
| 29 | C26.0 | Malignant neoplasm: Intestinal tract, part unspecified                |
| 30 | C26.1 | Malignant neoplasm: Spleen                                            |
| 31 | C26.8 | Malignant neoplasm: Overlapping lesion of digestive system            |
| 32 | C26.9 | Malignant neoplasm: Ill-defined sites within the digestive system     |
| 33 | C30.0 | Malignant neoplasm: Nasal cavity                                      |
| 34 | C30.1 | Malignant neoplasm: Middle ear                                        |
| 35 | C31.0 | Malignant neoplasm: Maxillary sinus                                   |
| 36 | C31.1 | Malignant neoplasm: Ethmoidal sinus                                   |
| 37 | C31.2 | Malignant neoplasm: Frontal sinus                                     |
| 38 | C31.3 | Malignant neoplasm: Sphenoidal sinus                                  |
| 39 | C31.8 | Malignant neoplasm: Overlapping lesion of accessory sinuses           |
| 40 | C31.9 | Malignant neoplasm: Accessory sinus, unspecified                      |
| 41 | C32.0 | Malignant neoplasm: Glottis                                           |
| 42 | C32.1 | Malignant neoplasm: Supraglottis                                      |
| 43 | C32.2 | Malignant neoplasm: Subglottis                                        |
| 44 | C32.3 | Malignant neoplasm: Laryngeal cartilage                               |
| 45 | C32.8 | Malignant neoplasm: Overlapping lesion of larynx                      |
| 46 | C32.9 | Malignant neoplasm: Larynx, unspecified                               |
| 47 | C33   | Malignant neoplasm of trachea                                         |
| 48 | C34.0 | Malignant neoplasm: Main bronchus                                     |
| 49 | C34.1 | Malignant neoplasm: Upper lobe, bronchus or lung                      |
| 50 | C34.2 | Malignant neoplasm: Middle lobe, bronchus or lung                     |
| 51 | C34.3 | Malignant neoplasm: Lower lobe, bronchus or lung                      |
| 52 | C34.8 | Malignant neoplasm: Overlapping lesion of bronchus and lung           |
| 53 | C34.9 | Malignant neoplasm: Bronchus or lung, unspecified                     |

|    |       |                                                                                 |
|----|-------|---------------------------------------------------------------------------------|
| 1  |       |                                                                                 |
| 2  | C37   | Malignant neoplasm of thymus                                                    |
| 3  | C38.0 | Malignant neoplasm: Heart                                                       |
| 4  | C38.1 | Malignant neoplasm: Anterior mediastinum                                        |
| 5  | C38.2 | Malignant neoplasm: Posterior mediastinum                                       |
| 6  | C38.3 | Malignant neoplasm: Mediastinum, part unspecified                               |
| 7  | C38.4 | Malignant neoplasm: Pleura                                                      |
| 8  | C38.8 | Malignant neoplasm: Overlapping lesion of heart, mediastinum and pleura         |
| 9  | C39.0 | Malignant neoplasm: Upper respiratory tract, part unspecified                   |
| 10 | C39.8 | Malignant neoplasm: Overlapping lesion of respiratory and intrathoracic organs  |
| 11 | C39.9 | Malignant neoplasm: Ill-defined sites within the respiratory system             |
| 12 | C40.0 | Malignant neoplasm: Scapula and long bones of upper limb                        |
| 13 | C40.1 | Malignant neoplasm: Short bones of upper limb                                   |
| 14 | C40.2 | Malignant neoplasm: Long bones of lower limb                                    |
| 15 | C40.3 | Malignant neoplasm: Short bones of lower limb                                   |
| 16 | C40.8 | Malignant neoplasm: Overlapping lesion of bone and articular cartilage of limbs |
| 17 | C40.9 | Malignant neoplasm: Bone and articular cartilage of limb, unspecified           |
| 18 | C41.0 | Malignant neoplasm: Bones of skull and face                                     |
| 19 | C41.1 | Malignant neoplasm: Mandible                                                    |
| 20 | C41.2 | Malignant neoplasm: Vertebral column                                            |
| 21 | C41.3 | Malignant neoplasm: Ribs, sternum and clavicle                                  |
| 22 | C41.4 | Malignant neoplasm: Pelvic bones, sacrum and coccyx                             |
| 23 | C41.8 | Malignant neoplasm: Overlapping lesion of bone and articular cartilage          |
| 24 | C41.9 | Malignant neoplasm: Bone and articular cartilage, unspecified                   |
| 25 | C43.0 | Malignant neoplasm: Malignant melanoma of lip                                   |
| 26 | C43.1 | Malignant neoplasm: Malignant melanoma of eyelid, including canthus             |
| 27 | C43.2 | Malignant neoplasm: Malignant melanoma of ear and external auricular canal      |
| 28 | C43.3 | Malignant neoplasm: Malignant melanoma of other and unspecified parts of face   |
| 29 | C43.4 | Malignant neoplasm: Malignant melanoma of scalp and neck                        |
| 30 | C43.5 | Malignant neoplasm: Malignant melanoma of trunk                                 |
| 31 | C43.6 | Malignant neoplasm: Malignant melanoma of upper limb, including shoulder        |
| 32 | C43.7 | Malignant neoplasm: Malignant melanoma of lower limb, including hip             |
| 33 | C43.8 | Malignant neoplasm: Overlapping malignant melanoma of skin                      |
| 34 | C43.9 | Malignant neoplasm: Malignant melanoma of skin, unspecified                     |
| 35 | C44.0 | Malignant neoplasm: Skin of lip                                                 |
| 36 | C44.1 | Malignant neoplasm: Skin of eyelid, including canthus                           |
| 37 | C44.2 | Malignant neoplasm: Skin of ear and external auricular canal                    |
| 38 | C44.3 | Malignant neoplasm: Skin of other and unspecified parts of face                 |
| 39 | C44.4 | Malignant neoplasm: Skin of scalp and neck                                      |
| 40 | C44.5 | Malignant neoplasm: Skin of trunk                                               |
| 41 | C44.6 | Malignant neoplasm: Skin of upper limb, including shoulder                      |
| 42 | C44.7 | Malignant neoplasm: Skin of lower limb, including hip                           |
| 43 | C44.8 | Malignant neoplasm: Overlapping lesion of skin                                  |
| 44 | C44.9 | Malignant neoplasm: Malignant neoplasm of skin, unspecified                     |
| 45 | C45.0 | Mesothelioma of pleura                                                          |
| 46 | C45.1 | Mesothelioma of peritoneum                                                      |
| 47 | C45.2 | Mesothelioma of pericardium                                                     |
| 48 | C45.7 | Mesothelioma of other sites                                                     |
| 49 | C45.9 | Mesothelioma, unspecified                                                       |
| 50 | C46.0 | Kaposi sarcoma of skin                                                          |
| 51 | C46.1 | Kaposi sarcoma of soft tissue                                                   |

|    |       |                                                                                          |
|----|-------|------------------------------------------------------------------------------------------|
| 1  |       |                                                                                          |
| 2  | C46.2 | Kaposi sarcoma of palate                                                                 |
| 3  | C46.3 | Kaposi sarcoma of lymph nodes                                                            |
| 4  | C46.7 | Kaposi sarcoma of other sites                                                            |
| 5  | C46.8 | Kaposi sarcoma of multiple organs                                                        |
| 6  | C46.9 | Kaposi sarcoma, unspecified                                                              |
| 7  |       |                                                                                          |
| 8  | C47.0 | Malignant neoplasm: Peripheral nerves of head, face and neck                             |
| 9  | C47.1 | Malignant neoplasm: Peripheral nerves of upper limb, including shoulder                  |
| 10 | C47.2 | Malignant neoplasm: Peripheral nerves of lower limb, including hip                       |
| 11 | C47.3 | Malignant neoplasm: Peripheral nerves of thorax                                          |
| 12 | C47.4 | Malignant neoplasm: Peripheral nerves of abdomen                                         |
| 13 | C47.5 | Malignant neoplasm: Peripheral nerves of pelvis                                          |
| 14 | C47.6 | Malignant neoplasm: Peripheral nerves of trunk, unspecified                              |
| 15 | C47.8 | Malignant neoplasm: Overlapping lesion of peripheral nerves and autonomic nervous system |
| 16 | C47.9 | Malignant neoplasm: Peripheral nerves and autonomic nervous system, unspecified          |
| 17 |       |                                                                                          |
| 18 | C48.0 | Malignant neoplasm: Retroperitoneum                                                      |
| 19 | C48.1 | Malignant neoplasm: Specified parts of peritoneum                                        |
| 20 | C48.2 | Malignant neoplasm: Peritoneum, unspecified                                              |
| 21 |       |                                                                                          |
| 22 | C48.8 | Malignant neoplasm: Overlapping lesion of retroperitoneum and peritoneum                 |
| 23 | C49.0 | Malignant neoplasm: Connective and soft tissue of head, face and neck                    |
| 24 | C49.1 | Malignant neoplasm: Connective and soft tissue of upper limb, including shoulder         |
| 25 | C49.2 | Malignant neoplasm: Connective and soft tissue of lower limb, including hip              |
| 26 | C49.3 | Malignant neoplasm: Connective and soft tissue of thorax                                 |
| 27 | C49.4 | Malignant neoplasm: Connective and soft tissue of abdomen                                |
| 28 | C49.5 | Malignant neoplasm: Connective and soft tissue of pelvis                                 |
| 29 | C49.6 | Malignant neoplasm: Connective and soft tissue of trunk, unspecified                     |
| 30 | C49.8 | Malignant neoplasm: Overlapping lesion of connective and soft tissue                     |
| 31 | C49.9 | Malignant neoplasm: Connective and soft tissue, unspecified                              |
| 32 |       |                                                                                          |
| 33 | C50.0 | Malignant neoplasm: Nipple and areola                                                    |
| 34 | C50.1 | Malignant neoplasm: Central portion of breast                                            |
| 35 | C50.2 | Malignant neoplasm: Upper-inner quadrant of breast                                       |
| 36 | C50.3 | Malignant neoplasm: Lower-inner quadrant of breast                                       |
| 37 | C50.4 | Malignant neoplasm: Upper-outer quadrant of breast                                       |
| 38 | C50.5 | Malignant neoplasm: Lower-outer quadrant of breast                                       |
| 39 | C50.6 | Malignant neoplasm: Axillary tail of breast                                              |
| 40 | C50.8 | Malignant neoplasm: Overlapping lesion of breast                                         |
| 41 | C50.9 | Malignant neoplasm: Breast, unspecified                                                  |
| 42 |       |                                                                                          |
| 43 | C51.0 | Malignant neoplasm: Labium majus                                                         |
| 44 | C51.1 | Malignant neoplasm: Labium minus                                                         |
| 45 | C51.2 | Malignant neoplasm: Clitoris                                                             |
| 46 | C51.8 | Malignant neoplasm: Overlapping lesion of vulva                                          |
| 47 | C51.9 | Malignant neoplasm: Vulva, unspecified                                                   |
| 48 | C52   | Malignant neoplasm of vagina                                                             |
| 49 |       |                                                                                          |
| 50 | C53.0 | Malignant neoplasm: Endocervix                                                           |
| 51 | C53.1 | Malignant neoplasm: Exocervix                                                            |
| 52 | C53.8 | Malignant neoplasm: Overlapping lesion of cervix uteri                                   |
| 53 | C53.9 | Malignant neoplasm: Cervix uteri, unspecified                                            |
| 54 | C54.0 | Malignant neoplasm: Isthmus uteri                                                        |
| 55 | C54.1 | Malignant neoplasm: Endometrium                                                          |
| 56 | C54.2 | Malignant neoplasm: Myometrium                                                           |
| 57 | C54.3 | Malignant neoplasm: Fundus uteri                                                         |

|    |       |                                                                 |
|----|-------|-----------------------------------------------------------------|
| 1  |       |                                                                 |
| 2  | C54.8 | Malignant neoplasm: Overlapping lesion of corpus uteri          |
| 3  | C54.9 | Malignant neoplasm: Corpus uteri, unspecified                   |
| 4  | C55   | Malignant neoplasm of uterus, part unspecified                  |
| 5  | C56   | Malignant neoplasm of ovary                                     |
| 6  | C57.0 | Malignant neoplasm: Fallopian tube                              |
| 7  | C57.1 | Malignant neoplasm: Broad ligament                              |
| 8  | C57.2 | Malignant neoplasm: Round ligament                              |
| 9  | C57.3 | Malignant neoplasm: Parametrium                                 |
| 10 | C57.4 | Malignant neoplasm: Uterine adnexa, unspecified                 |
| 11 | C57.7 | Malignant neoplasm: Other specified female genital organs       |
| 12 | C57.8 | Malignant neoplasm: Overlapping lesion of female genital organs |
| 13 | C57.9 | Malignant neoplasm: Female genital organ, unspecified           |
| 14 | C58   | Malignant neoplasm of placenta                                  |
| 15 | C60.0 | Malignant neoplasm: Prepuce                                     |
| 16 | C60.1 | Malignant neoplasm: Glans penis                                 |
| 17 | C60.2 | Malignant neoplasm: Body of penis                               |
| 18 | C60.8 | Malignant neoplasm: Overlapping lesion of penis                 |
| 19 | C60.9 | Malignant neoplasm: Penis, unspecified                          |
| 20 | C62.0 | Malignant neoplasm: Undescended testis                          |
| 21 | C62.1 | Malignant neoplasm: Descended testis                            |
| 22 | C62.9 | Malignant neoplasm: Testis, unspecified                         |
| 23 | C63.0 | Malignant neoplasm: Epididymis                                  |
| 24 | C63.1 | Malignant neoplasm: Spermatic cord                              |
| 25 | C63.2 | Malignant neoplasm: Scrotum                                     |
| 26 | C63.7 | Malignant neoplasm: Other specified male genital organs         |
| 27 | C63.8 | Malignant neoplasm: Overlapping lesion of male genital organs   |
| 28 | C63.9 | Malignant neoplasm: Male genital organ, unspecified             |
| 29 | C64   | Malignant neoplasm of kidney, except renal pelvis               |
| 30 | C65   | Malignant neoplasm of renal pelvis                              |
| 31 | C66   | Malignant neoplasm of ureter                                    |
| 32 | C68.0 | Malignant neoplasm: Urethra                                     |
| 33 | C68.1 | Malignant neoplasm: Paraurethral gland                          |
| 34 | C68.8 | Malignant neoplasm: Overlapping lesion of urinary organs        |
| 35 | C68.9 | Malignant neoplasm: Urinary organ, unspecified                  |
| 36 | C69.0 | Malignant neoplasm: Conjunctiva                                 |
| 37 | C69.1 | Malignant neoplasm: Cornea                                      |
| 38 | C69.2 | Malignant neoplasm: Retina                                      |
| 39 | C69.3 | Malignant neoplasm: Choroid                                     |
| 40 | C69.4 | Malignant neoplasm: Ciliary body                                |
| 41 | C69.5 | Malignant neoplasm: Lacrimal gland and duct                     |
| 42 | C69.6 | Malignant neoplasm: Orbit                                       |
| 43 | C69.8 | Malignant neoplasm: Overlapping lesion of eye and adnexa        |
| 44 | C69.9 | Malignant neoplasm: Eye, unspecified                            |
| 45 | C70.0 | Malignant neoplasm: Cerebral meninges                           |
| 46 | C70.1 | Malignant neoplasm: Spinal meninges                             |
| 47 | C70.9 | Malignant neoplasm: Meninges, unspecified                       |
| 48 | C71.0 | Malignant neoplasm: Cerebrum, except lobes and ventricles       |
| 49 | C71.1 | Malignant neoplasm: Frontal lobe                                |
| 50 | C71.2 | Malignant neoplasm: Temporal lobe                               |
| 51 | C71.3 | Malignant neoplasm: Parietal lobe                               |

|    |       |                                                                                                      |
|----|-------|------------------------------------------------------------------------------------------------------|
| 1  |       |                                                                                                      |
| 2  | C71.4 | Malignant neoplasm: Occipital lobe                                                                   |
| 3  | C71.5 | Malignant neoplasm: Cerebral ventricle                                                               |
| 4  | C71.6 | Malignant neoplasm: Cerebellum                                                                       |
| 5  | C71.7 | Malignant neoplasm: Brain stem                                                                       |
| 6  | C71.8 | Malignant neoplasm: Overlapping lesion of brain                                                      |
| 7  | C71.9 | Malignant neoplasm: Brain, unspecified                                                               |
| 8  | C72.0 | Malignant neoplasm: Spinal cord                                                                      |
| 9  | C72.2 | Malignant neoplasm: Olfactory nerve                                                                  |
| 10 | C72.3 | Malignant neoplasm: Optic nerve                                                                      |
| 11 | C72.4 | Malignant neoplasm: Acoustic nerve                                                                   |
| 12 | C72.5 | Malignant neoplasm: Other and unspecified cranial nerves                                             |
| 13 | C72.8 | Malignant neoplasm: Overlapping lesion of brain and other parts of central nervous system            |
| 14 | C72.9 | Malignant neoplasm: Central nervous system, unspecified                                              |
| 15 | C74.0 | Malignant neoplasm: Cortex of adrenal gland                                                          |
| 16 | C74.1 | Malignant neoplasm: Medulla of adrenal gland                                                         |
| 17 | C74.9 | Malignant neoplasm: Adrenal gland, unspecified                                                       |
| 18 | C75.0 | Malignant neoplasm: Parathyroid gland                                                                |
| 19 | C75.1 | Malignant neoplasm: Pituitary gland                                                                  |
| 20 | C75.2 | Malignant neoplasm: Craniopharyngeal duct                                                            |
| 21 | C75.3 | Malignant neoplasm: Pineal gland                                                                     |
| 22 | C75.4 | Malignant neoplasm: Carotid body                                                                     |
| 23 | C75.5 | Malignant neoplasm: Aortic body and other paraganglia                                                |
| 24 | C75.8 | Malignant neoplasm: Pluriglandular involvement, unspecified                                          |
| 25 | C75.9 | Malignant neoplasm: Endocrine gland, unspecified                                                     |
| 26 | C76.0 | Malignant neoplasm of other and ill-defined sites: Head, face and neck                               |
| 27 | C76.1 | Malignant neoplasm of other and ill-defined sites: Thorax                                            |
| 28 | C76.2 | Malignant neoplasm of other and ill-defined sites: Abdomen                                           |
| 29 | C76.3 | Malignant neoplasm of other and ill-defined sites: Pelvis                                            |
| 30 | C76.4 | Malignant neoplasm of other and ill-defined sites: Upper limb                                        |
| 31 | C76.5 | Malignant neoplasm of other and ill-defined sites: Lower limb                                        |
| 32 | C76.7 | Malignant neoplasm of other and ill-defined sites: Other ill-defined sites                           |
| 33 | C76.8 | Malignant neoplasm of other and ill-defined sites: Overlapping lesion of other and ill-defined sites |
| 34 | C77.0 | Secondary and unspecified malignant neoplasm: Lymph nodes of head, face and neck                     |
| 35 | C77.1 | Secondary and unspecified malignant neoplasm: Intrathoracic lymph nodes                              |
| 36 | C77.2 | Secondary and unspecified malignant neoplasm: Intra-abdominal lymph nodes                            |
| 37 | C77.3 | Secondary and unspecified malignant neoplasm: Axillary and upper limb lymph nodes                    |
| 38 | C77.4 | Secondary and unspecified malignant neoplasm: Inguinal and lower limb lymph nodes                    |
| 39 | C77.5 | Secondary and unspecified malignant neoplasm: Intrapelvic lymph nodes                                |
| 40 | C77.8 | Secondary and unspecified malignant neoplasm: Lymph nodes of multiple regions                        |
| 41 | C77.9 | Secondary and unspecified malignant neoplasm: Lymph node, unspecified                                |
| 42 | C78.0 | Secondary malignant neoplasm of lung                                                                 |
| 43 | C78.1 | Secondary malignant neoplasm of mediastinum                                                          |
| 44 | C78.2 | Secondary malignant neoplasm of pleura                                                               |
| 45 | C78.3 | Secondary malignant neoplasm of other and unspecified respiratory organs                             |
| 46 | C78.4 | Secondary malignant neoplasm of small intestine                                                      |
| 47 | C78.5 | Secondary malignant neoplasm of large intestine and rectum                                           |
| 48 | C78.6 | Secondary malignant neoplasm of retroperitoneum and peritoneum                                       |
| 49 | C78.7 | Secondary malignant neoplasm of liver and intrahepatic bile duct                                     |
| 50 | C78.8 | Secondary malignant neoplasm of other and unspecified digestive organs                               |
| 51 | C79.0 | Secondary malignant neoplasm of kidney and renal pelvis                                              |



|    |       |                                                                                  |
|----|-------|----------------------------------------------------------------------------------|
| 1  |       |                                                                                  |
| 2  | C79.1 | Secondary malignant neoplasm of bladder and other and unspecified urinary organs |
| 3  | C79.2 | Secondary malignant neoplasm of skin                                             |
| 4  | C79.3 | Secondary malignant neoplasm of brain and cerebral meninges                      |
| 5  | C79.4 | Secondary malignant neoplasm of other and unspecified parts of nervous system    |
| 6  | C79.5 | Secondary malignant neoplasm of bone and bone marrow                             |
| 7  | C79.6 | Secondary malignant neoplasm of ovary                                            |
| 8  | C79.7 | Secondary malignant neoplasm of adrenal gland                                    |
| 9  | C79.8 | Secondary malignant neoplasm of other specified sites                            |
| 10 | C79.9 | Secondary malignant neoplasm, unspecified site                                   |
| 11 | C80.0 | Malignant neoplasm, primary site unknown, so stated                              |
| 12 | C80.9 | Malignant neoplasm, primary site unspecified                                     |
| 13 |       |                                                                                  |
| 14 |       |                                                                                  |
| 15 |       |                                                                                  |
| 16 |       |                                                                                  |
| 17 |       |                                                                                  |
| 18 |       |                                                                                  |
| 19 |       |                                                                                  |
| 20 |       |                                                                                  |
| 21 |       |                                                                                  |
| 22 |       |                                                                                  |
| 23 |       |                                                                                  |
| 24 |       |                                                                                  |
| 25 |       |                                                                                  |
| 26 |       |                                                                                  |
| 27 |       |                                                                                  |
| 28 |       |                                                                                  |
| 29 |       |                                                                                  |
| 30 |       |                                                                                  |
| 31 |       |                                                                                  |
| 32 |       |                                                                                  |
| 33 |       |                                                                                  |
| 34 |       |                                                                                  |
| 35 |       |                                                                                  |
| 36 |       |                                                                                  |
| 37 |       |                                                                                  |
| 38 |       |                                                                                  |
| 39 |       |                                                                                  |
| 40 |       |                                                                                  |
| 41 |       |                                                                                  |
| 42 |       |                                                                                  |
| 43 |       |                                                                                  |
| 44 |       |                                                                                  |
| 45 |       |                                                                                  |
| 46 |       |                                                                                  |
| 47 |       |                                                                                  |
| 48 |       |                                                                                  |
| 49 |       |                                                                                  |
| 50 |       |                                                                                  |
| 51 |       |                                                                                  |
| 52 |       |                                                                                  |
| 53 |       |                                                                                  |
| 54 |       |                                                                                  |
| 55 |       |                                                                                  |
| 56 |       |                                                                                  |
| 57 |       |                                                                                  |
| 58 |       |                                                                                  |
| 59 |       |                                                                                  |
| 60 |       |                                                                                  |

For peer review only

1  
2  
3  
4  
5  
6  
7  
8  
9  
10  
11  
12  
13  
14  
15  
16  
17  
18  
19  
20  
21  
22  
23  
24  
25  
26  
27  
28  
29  
30  
31  
32  
33  
34  
35  
36  
37  
38  
39  
40  
41  
42  
43  
44  
45  
46  
47  
48  
49  
50  
51  
52  
53  
54  
55  
56  
57  
58  
59  
60

For peer review only



1  
2  
3  
4  
5  
6  
7  
8  
9  
10  
11  
12  
13  
14  
15  
16  
17  
18  
19  
20  
21  
22  
23  
24  
25  
26  
27  
28  
29  
30  
31  
32  
33  
34  
35  
36  
37  
38  
39  
40  
41  
42  
43  
44  
45  
46  
47  
48  
49  
50  
51  
52  
53  
54  
55  
56  
57  
58  
59  
60

For peer review only

1  
2  
3  
4  
5  
6  
7  
8  
9  
10  
11  
12  
13  
14  
15  
16  
17  
18  
19  
20  
21  
22  
23  
24  
25  
26  
27  
28  
29  
30  
31  
32  
33  
34  
35  
36  
37  
38  
39  
40  
41  
42  
43  
44  
45  
46  
47  
48  
49  
50  
51  
52  
53  
54  
55  
56  
57  
58  
59  
60

For peer review only

1  
2  
3  
4  
5  
6  
7  
8  
9  
10  
11  
12  
13  
14  
15  
16  
17  
18  
19  
20  
21  
22  
23  
24  
25  
26  
27  
28  
29  
30  
31  
32  
33  
34  
35  
36  
37  
38  
39  
40  
41  
42  
43  
44  
45  
46  
47  
48  
49  
50  
51  
52  
53  
54  
55  
56  
57  
58  
59  
60

For peer review only

1  
2  
3  
4  
5  
6  
7  
8  
9  
10  
11  
12  
13  
14  
15  
16  
17  
18  
19  
20  
21  
22  
23  
24  
25  
26  
27  
28  
29  
30  
31  
32  
33  
34  
35  
36  
37  
38  
39  
40  
41  
42  
43  
44  
45  
46  
47  
48  
49  
50  
51  
52  
53  
54  
55  
56  
57  
58  
59  
60

For peer review only

1  
2  
3  
4  
5  
6  
7  
8  
9  
10  
11  
12  
13  
14  
15  
16  
17  
18  
19  
20  
21  
22  
23  
24  
25  
26  
27  
28  
29  
30  
31  
32  
33  
34  
35  
36  
37  
38  
39  
40  
41  
42  
43  
44  
45  
46  
47  
48  
49  
50  
51  
52  
53  
54  
55  
56  
57  
58  
59  
60

For peer review only

1  
2  
3  
4  
5  
6  
7  
8  
9  
10  
11  
12  
13  
14  
15  
16  
17  
18  
19  
20  
21  
22  
23  
24  
25  
26  
27  
28  
29  
30  
31  
32  
33  
34  
35  
36  
37  
38  
39  
40  
41  
42  
43  
44  
45  
46  
47  
48  
49  
50  
51  
52  
53  
54  
55  
56  
57  
58  
59  
60

For peer review only

tes

|    |                  |
|----|------------------|
| 1  |                  |
| 2  | Medcodeid        |
| 3  | 16067019         |
| 4  | 28038011         |
| 5  | 28040018         |
| 6  | 29745012         |
| 7  | 38839013         |
| 8  | 75861010         |
| 9  | 110356018        |
| 10 | 293560010        |
| 11 | 293566016        |
| 12 | 293570012        |
| 13 | 293571011        |
| 14 | 293828012        |
| 15 | 293836015        |
| 16 | 297164011        |
| 17 | 297554011        |
| 18 | 301718017        |
| 19 | 303845017        |
| 20 | 356485018        |
| 21 | 356488016        |
| 22 | 356490015        |
| 23 | 356491016        |
| 24 | 356493018        |
| 25 | 415948012        |
| 26 | 420648014        |
| 27 | 455076017        |
| 28 | 485267014        |
| 29 | 493961016        |
| 30 | 1230634013       |
| 31 | 1235651015       |
| 32 | 1235653017       |
| 33 | 1777779015       |
| 34 | 2477015019       |
| 35 | 2675336016       |
| 36 | 480631000006119  |
| 37 | 666221000006118  |
| 38 | 666351000006116  |
| 39 | 682631000006116  |
| 40 | 821721000006117  |
| 41 | 1148681000000115 |
| 42 | 1780351000006112 |
| 43 | 1846681000006117 |
| 44 | 2196311000000112 |
| 45 | 2196531000000112 |
| 46 | 2196561000000119 |
| 47 | 2211411000000114 |
| 48 | 2211441000000110 |
| 49 | 2211461000000111 |
| 50 | 2211471000000116 |
| 51 | 2211521000000119 |

For peer review only

1 2211531000000117  
2 3181661000006112  
3 3288141000006111  
4 3580531000006116  
5 3618851000006119  
6 3618891000006113  
7 3953811000006116  
8 4770891000006111  
9 5663711000006113  
10 8118601000006117  
11 14071301000006119  
12 354612017  
13 354613010  
14 354615015  
15 354616019  
16 354617011  
17 354618018  
18 354619014  
19 354623018  
20 354624012  
21 354627017  
22 354628010  
23 422992018  
24 384481000006118  
25 1905531000006112  
26 5067801000006115  
27 5094171000006114  
28 5096231000006110  
29 7133411000006113  
30 292274012  
31 313331000006110  
32 399761000006116  
33 683041000006112  
34 683051000006114  
35 683061000006111  
36 683071000006116  
37 1694851000000112  
38 1815691000006116  
39 1815791000006111  
40 4173251000006117  
41 4417551000006118  
42 5325991000006118  
43 7308311000006114  
44 7561511000006114  
45 7597941000006114  
46 12616771000006112  
47 474077018  
48 306971000006117  
49 4417331000006119  
50 23676016

For peer review only



1  
2 297780010  
3 2164217010  
4 2816277010  
5 141181000006110  
6 141191000006113  
7 141201000006111  
8 141211000006114  
9 141221000006118  
10 141231000006115  
11 141241000006113  
12 413591000006113  
13 940531000006110  
14 2005411000006110  
15 2380521000000115  
16 2684701000006112  
17 3070701000006112  
18 3260101000006113  
19 3308541000006113  
20 4392811000006113  
21 4392911000006118  
22 6888471000006113  
23 6904721000006118  
24 6904731000006115  
25 6905681000006114  
26 6905701000006112  
27 6906651000006110  
28 6906661000006112  
29 7089281000006117  
30 12084841000006111  
31 12084861000006110  
32 12218521000006116  
33 12735431000006111  
34 12735441000006118  
35 260879014  
36 289874016  
37 289974015  
38 289980011  
39 312137011  
40 344818012  
41 344819016  
42 344820010  
43 457317011  
44 474077018  
45 1216346016  
46 1231541019  
47 2871720012  
48 139571000006117  
49 306971000006117  
50 313001000006116  
51 313271000006116

For peer review only

1  
2 313381000006111  
3 313391000006114  
4 315461000006113  
5 316711000006113  
6 458201000006115  
7  
8 683191000006119  
9 695561000006118  
10 880801000006116  
11 907281000006117  
12 1870401000006113  
13 2999011000006111  
14 3019771000006115  
15 3043491000006119  
16 3109051000006115  
17 3408441000006115  
18 3408461000006116  
19 3408471000006111  
20 3408501000006116  
21 4172921000006112  
22 4172951000006115  
23 4173671000006112  
24 4417331000006119  
25 5601561000006117  
26 5601571000006112  
27 5648201000006119  
28 5701111000006119  
29 5701131000006113  
30 5701141000006115  
31 5701151000006118  
32 6623111000006119  
33 6843711000006111  
34 6860401000006118  
35 6870291000006119  
36 7057421000006116  
37 7057441000006111  
38 7236901000006114  
39 7236911000006112  
40 7248451000006116  
41 8037771000006119  
42 88121017  
43 292075015  
44 344846014  
45 450987014  
46 1220821017  
47 2870704010  
48 310071000006116  
49 3358901000006111  
50 5971121000006114  
51 293925011  
52 293986010

For peer review only

1  
2 293999013  
3 294000010  
4 294004018  
5 294007013  
6 294079010  
7 294082017  
8 294085015  
9 294231010  
10 294236017  
11 294583019  
12 294590012  
13 294606017  
14 351107016  
15 493120017  
16 496498015  
17 499268014  
18 499346019  
19 499626019  
20 508244016  
21 1216006019  
22 1216286014  
23 1216339013  
24 1216340010  
25 1216755016  
26 2535668013  
27 2816277010  
28 110881000006115  
29 141181000006110  
30 141191000006113  
31 141201000006111  
32 141211000006114  
33 141221000006118  
34 141231000006115  
35 141241000006113  
36 582091000006116  
37 582791000006119  
38 711521000006117  
39 711531000006119  
40 813801000006111  
41 813821000006118  
42 813851000006110  
43 821381000006117  
44 881991000006113  
45 1815761000006115  
46 2790391000006118  
47 2992501000006112  
48 2992581000006115  
49 3260101000006113  
50 3514431000006111  
51 3620051000006119

For peer review only

1 3944001000006113  
2 4392811000006113  
3 4417981000006117  
4 6904731000006115  
5 6906661000006112  
6 7843061000006112  
7 7869351000006117  
8 11998051000006118  
9 12735441000006118  
10 201652012  
11 289875015  
12 289876019  
13 289880012  
14 289881011  
15 289884015  
16 289888017  
17 289889013  
18 292005016  
19 292006015  
20 292009010  
21 292010017  
22 292028015  
23 292031019  
24 292177013  
25 414008012  
26 414151014  
27 414160018  
28 414248013  
29 509741017  
30 1216015014  
31 1216360019  
32 1216396015  
33 202801000006110  
34 306931000006115  
35 311311000006115  
36 311511000006114  
37 314521000006116  
38 555131000006118  
39 731621000006113  
40 880821000006114  
41 880831000006112  
42 880841000006119  
43 2168661000000116  
44 2168671000000111  
45 2168681000000113  
46 2233381000000115  
47 2233421000000112  
48 2233461000000116  
49 3019871000006112  
50 3020041000006112

For peer review only

1  
2 3327891000006112  
3 3327901000006111  
4 3327911000006114  
5 3327921000006118  
6 3327961000006112  
7  
8 3327971000006117  
9 3992621000006112  
10 3992631000006110  
11 4009731000006118  
12 4009741000006111  
13  
14 4416411000006118  
15 4416551000006116  
16 4416591000006110  
17 4416681000006111  
18 4416691000006114  
19  
20 4420051000006115  
21 4420351000006118  
22 4753241000006113  
23 5599791000006114  
24 5599801000006110  
25  
26 5600851000006111  
27 5600941000006116  
28 5601231000006111  
29 5601261000006119  
30 5601291000006110  
31 5601361000006112  
32 5601401000006119  
33 5601461000006118  
34  
35 6347711000006119  
36 6693111000006110  
37  
38 7048071000006112  
39 7048121000006112  
40 7118591000006115  
41 7527551000006112  
42 7716791000006117  
43 7849031000006117  
44 7868981000006116  
45 7995641000006118  
46 8020031000006118  
47  
48 13660051000006110  
49 13937971000006110  
50 14075341000006119  
51  
52 289813015  
53 292170010  
54 414257019  
55 414278016  
56 451429010  
57 2901912012  
58 3517129013  
59  
60 308801000006118

For peer review only

1 309181000006110  
2 763421000006116  
3 763431000006118  
4 1815151000006116  
5 1815161000006119  
6 1815171000006114  
7 1815181000006112  
8 1815221000006115  
9 1815231000006117  
10 1815491000006119  
11 2124491000000113  
12 2124511000000117  
13 2734791000000113  
14 3150381000006111  
15 3393051000006113  
16 3395251000006115  
17 4172561000006112  
18 4172591000006116  
19 4172601000006112  
20 5602251000006111  
21 5602351000006117  
22 5602371000006110  
23 5602571000006115  
24 5975501000006113  
25 6693411000006115  
26 6940861000006118  
27 6940871000006113  
28 7353041000006113  
29 7358451000006113  
30 7361211000006114  
31 7369661000006114  
32 7566531000006112  
33 7569011000006116  
34 13686181000006118  
35 351150014  
36 492446019  
37 2759411000006117  
38 2927341000006111  
39 4392941000006119  
40 3572551000006118  
41 3572591000006112  
42 3620711000006117  
43 2759391000006117  
44 7730691000006117  
45 2933771000006112  
46 3260631000006113  
47 5063951000006115  
48 4393011000006110  
49 3375911000006118  
50 6897941000006112

For peer review only

1  
2 3260621000006110  
3 3574151000006117  
4 3741651000006111  
5 3910091000006119  
6 8022691000006113  
7 2760441000006117  
8 3087921000006111  
9 3910111000006111  
10 3375961000006115  
11 3375951000006117  
12 3690391000006116  
13 3087931000006114  
14 2872741000006118  
15 4197441000006118  
16 3503691000006112  
17 6897931000006119  
18 6901291000006112  
19 5064031000006113  
20 9330921000006118  
21 3503711000006110  
22 3508741000006117  
23 3087941000006116  
24 4393031000006116  
25 7730701000006117  
26 501134015  
27 141261000006112  
28 510091000006118  
29 5064051000006118  
30 7730711000006119  
31 3625611000006116  
32 2769291000006117  
33 2760461000006118  
34 5606361000006119  
35 3741641000006114  
36 3910101000006113  
37 7730721000006110  
38 2769261000006113  
39 3505255014  
40 5063871000006119  
41 2584211000006111  
42 3572561000006116  
43 3726941000006112  
44 4392911000006118  
45 3726951000006114  
46 4392921000006114  
47 110881000006115  
48 294586010  
49 881981000006110  
50 477758018  
51 3574141000006119  
52  
53  
54  
55  
56  
57  
58  
59  
60

For peer review only

1  
2 5064041000006115  
3 2769271000006118  
4 3959891000006111  
5 9330941000006113  
6 2760431000006110  
7 3505254013  
8 4393081000006115  
9 4393061000006113  
10 3869571000006114  
11 9330911000006114  
12 3505252012  
13 5063971000006113  
14 3910121000006115  
15 4393021000006119  
16 4393051000006111  
17 3087871000006118  
18 3572571000006111  
19 2759381000006115  
20 2927331000006118  
21 2759371000006118  
22 474030011  
23 2872731000006111  
24 3910081000006117  
25 5606351000006116  
26 5063941000006117  
27 3375921000006114  
28 2933781000006110  
29 3375931000006112  
30 7769041000006118  
31 6901301000006113  
32 4393041000006114  
33 8022671000006112  
34 3620681000006118  
35 4392981000006113  
36 4392961000006115  
37 7750601000006113  
38 3087851000006111  
39 7750581000006115  
40 3959881000006113  
41 7750591000006117  
42 8022681000006110  
43 5063991000006114  
44 8022661000006117  
45 5063961000006118  
46 12735491000006110  
47 3910131000006117  
48 4392971000006110  
49 3145291000006113  
50 3572581000006114  
51 4197431000006111

For peer review only



1  
2 3625601000006119  
3 5063981000006111  
4 12735511000006116  
5 399206011  
6 3869581000006112  
7 3505251017  
8 3087881000006115  
9 3690381000006119  
10 3375941000006119  
11 4393071000006118  
12 3508751000006115  
13 3620691000006115  
14 2584231000006117  
15 9330931000006115  
16 3726961000006111  
17 2759401000006115  
18 399209016  
19 500268011  
20 7750571000006118  
21 2760451000006115  
22 7769031000006111  
23 5064021000006110  
24 2927351000006113  
25 2927381000006117  
26 711521000006117  
27 711531000006119  
28 2584251000006112  
29 2584181000006112  
30 2592491000006111  
31 2584261000006114  
32 496520018  
33 2592511000006117  
34 5313751000006118  
35 2592521000006113  
36 2584221000006115  
37 2584191000006110  
38 2592541000006118  
39 2584271000006119  
40 2592531000006111  
41 2592501000006115  
42 2584201000006113  
43 5313761000006116  
44  
45  
46  
47  
48  
49  
50  
51  
52  
53  
54  
55  
56  
57  
58  
59  
60

For peer review only

## 1 Term

2  
3 Familial amyloid polyneuropathy, Iowa type  
4 Senile cardiac amyloidosis  
5 Cardiac amyloidosis  
6 Amyloidosis  
7 AL amyloidosis  
8 Cerebrovascular amyloidosis  
9 Amyloid nephropathy of Ostertag  
10 Sporadic primary amyloidosis  
11 Primary amyloidosis NEC  
12 Other specified amyloidosis  
13 Amyloidosis NOS  
14 [X]Other amyloidosis  
15 [X]Hereditary amyloidosis, unspecified  
16 Autonomic neuropathy due to amyloid  
17 Polyneuropathy in amyloidosis  
18 Pulmonary amyloidosis  
19 Nephrotic syndrome in amyloidosis  
20 Organ limited non-hereditary amyloidosis  
21 Articular amyloid  
22 Amyloid arthropathy  
23 Arthropathy in amyloidosis  
24 Senile systemic amyloidosis  
25 Amyloid of bladder  
26 Amyloid of prostate  
27 Amyloid disease of the urethra  
28 Beta-2 microglobulin amyloidosis  
29 Familial amyloid polyneuropathy type II  
30 Nephropathic amyloidosis  
31 Familial amyloid polyneuropathy type III  
32 British type amyloid polyneuropathy  
33 Amyloid polyneuropathy type I  
34 Andrade type amyloid polyneuropathy  
35 Amyloid A level  
36 Amyloid heart muscle disease  
37 Familial cardiac amyloid  
38 Familial neuropathic amyloid  
39 Myopathy due to amyloid  
40 Hereditary amyloidosis, unspecified  
41 Radiolabelled serum amyloid P component scintigraphy  
42 Participant in ALchemy (AL amyloidosis chemotherapy) study  
43 Amyloid nephropathy with deafness and urticaria  
44 Amyloid cardiomyopathy  
45 Amyloidosis of stomach  
46 Amyloid of stomach  
47 Amyloidosis of intestine  
48 Amyloid of intestine  
49 Amyloidosis of small intestine  
50 Amyloid of small intestine  
51 Amyloidosis of large intestine  
52

1 Amyloid of large intestine  
2 Familial neuropathic amyloidosis  
3 Renal amyloidosis  
4 Familial visceral amyloidosis, Ostertag type  
5 Amyloid deposition  
6 Amyloid  
7 Systemic amyloidosis  
8 Amyloid myopathy  
9 Amyloid of testes  
10 Hereditary amyloidosis  
11 Autonomic neuropathy due to amyloidosis  
12 Accelerated rejection of renal transplant  
13 Very mild acute rejection of renal transplant  
14 Acute rejection of renal transplant  
15 Acute rejection of renal transplant - grade I  
16 Acute rejection of renal transplant - grade II  
17 Acute rejection of renal transplant - grade III  
18 Chronic rejection of renal transplant  
19 Chronic rejection of renal transplant - grade 1  
20 Chronic rejection of renal transplant - grade II  
21 Chronic rejection of renal transplant - grade III  
22 Acute-on-chronic rejection of renal transplant  
23 Excision of rejected transplanted kidney  
24 [X]Failure & rejection of other transplanted organ & tissue  
25 Excision of rejected transplanted kidney  
26 GVHD - Graft-versus-host disease  
27 End stage renal failure with renal transplant  
28 Failed renal transplant  
29 Acute rejection of liver transplant  
30 [X]Myelodysplastic syndrome, unspecified  
31 Myelodysplastic syndrome  
32 [X]Neoplasm/uncertain+unknown behavior/other myelodysplastic syndrome  
33 Myelodysplastic syndrome (clinical)  
34 Myelodysplasia  
35 Myelodysplasia of the spinal cord  
36 Myelodysplastic syndrome  
37 Myelodysplastic syndrome drugs Band 1  
38 Myelodysplastic/myeloproliferative disease  
39 Myelodysplastic syndrome with isolated del(5q) chromosomal abnormality  
40 MDS - Myelodysplastic syndrome  
41 Myelodysplastic syndrome with 5q- syndrome  
42 Myelodysplasia of spinal cord  
43 Acute myeloid leukaemia with myelodysplasia-related changes  
44 Therapy-related myelodysplastic syndrome  
45 Childhood myelodysplastic syndrome  
46 MDS (myelodysplasia) tumour and germline WGS (whole genome sequencing)  
47 Chronic myelomonocytic leukaemia  
48 Chronic myelomonocytic leukaemia  
49 Chronic myelomonocytic leukemia  
50 Sickle cell nephropathy

1 Proliferative retinopathy due to sickle cell disease  
2 RBC's - sickle cells present  
3 History of sickle cell anaemia  
4 Sickle cell anaemia  
5 Sickle-cell anaemia NOS  
6 Sickle-cell anaemia of unspecified type  
7 Sickle cell anaemia with crisis  
8 Sickle cell anaemia with haemoglobin C disease  
9 Sickle-cell anaemia with haemoglobin D disease  
10 Sickle-cell anaemia with haemoglobin E disease  
11 [X]Other sickle-cell disorders  
12 H/O: sickle cell disease  
13 Sickle cell disease annual review  
14 Referral to sickle cell specialist nurse  
15 Sickle cell retinopathy  
16 Sickle cell-haemoglobin C disease  
17 Sickle cell anaemia with haemoglobin E disease  
18 Sickle cell  
19 Sickle cell anemia  
20 Sickle cell-beta-thalassaemia  
21 Sickle cell disease without crisis  
22 Hemoglobin S sickling disorder with crisis  
23 Sickle cell anemia crisis  
24 Sickling disorder due to haemoglobin S  
25 Sickle cell disease  
26 Sickle cell crisis  
27 Sickle cell anemia with crisis  
28 Suspected sickle cell  
29 Vaso-occlusive pain episode in sickle cell disease  
30 Vasoocclusive pain episode in sickle cell disease  
31 Sickle cell-haemoglobin SS disease  
32 NHS Sickle Cell and Thalassaemia Screening Programme result consistent with Hb SS (sickle cell-Haemoglobin S)  
33 NHS Sickle Cell and Thalassaemia Screening Programme result consistent with sickle cell anaemia  
34 Bone marrow: myeloma cells  
35 Immunoproliferative neoplasm or myeloma NOS  
36 Myelomonocytic leukaemia  
37 Subacute myelomonocytic leukaemia  
38 Osteoporosis in multiple myelomatosis  
39 Kahler's disease  
40 Myelomatosis  
41 Multiple myeloma  
42 Lambda light chain myeloma  
43 Chronic myelomonocytic leukaemia  
44 [M]Acute myelomonocytic leukaemia  
45 [M]Plasma cell myeloma  
46 Juvenile myelomonocytic leukaemia  
47 Solitary myeloma  
48 Chronic myelomonocytic leukaemia  
49 [M]Monostotic myeloma  
50 [M]Multiple myeloma

1 [M]Myeloma NOS  
2 [M]Myelomatosis  
3 [M]Plasmacytic myeloma  
4 [M]Solitary myeloma  
5 M4 - Acute myelomonocytic leukaemia  
6 Myeloma - solitary  
7 Multiple myeloma and immunoproliferative neoplasms  
8 Multiple myeloma etc.  
9 [RFC] Multiple myeloma  
10 Juvenile myelomonocytic leukaemia  
11 Acute myelomonocytic leukaemia  
12 Myeloma kidney  
13 Myelomalacia  
14 Myelomonocytic leukaemia  
15 Multiple myeloma  
16 Plasma cell myeloma  
17 Myeloma  
18 Multiple myeloma, no International Classification of Diseases for Oncology subtype  
19 Plasmacytic myeloma  
20 Myeloma  
21 AMML - Acute myelomonocytic leukaemia  
22 Chronic myelomonocytic leukemia  
23 Light chain myeloma  
24 Non-secretory myeloma  
25 Myeloma screening  
26 IgA myeloma  
27 IgG myeloma  
28 Immunoglobulin G myeloma  
29 IgD myeloma  
30 Plasma cell myeloma/plasmacytoma  
31 Smouldering myeloma  
32 Kappa light chain myeloma  
33 Plasma cell myeloma/plasmacytoma  
34 Solitary osseous myeloma  
35 Monostotic myeloma  
36 Asymptomatic multiple myeloma  
37 Asymptomatic myeloma  
38 Indolent multiple myeloma  
39 History of multiple myeloma  
40 Myelofibrosis  
41 [M]Acute myelofibrosis  
42 Acute myelofibrosis  
43 Myelosclerosis with myeloid metaplasia  
44 [M]Myelosclerosis with myeloid metaplasia  
45 Osteomyelofibrosis  
46 [M]Hodgkin's disease, lymphocytic depletion, diffuse fibrosis  
47 MF - Myelofibrosis  
48 Primary myelofibrosis  
49 Congenital folate malabsorption anaemia  
50 Haemolytic anaemia due to glutathione metabolism disorder

1 Haemolytic anaemia due to hexokinase deficiency  
2 Haemolytic anaemia due to pyruvate kinase deficiency  
3 Anaemia due to disorders of nucleotide metabolism  
4 Enzyme deficiency haemolytic anaemia NOS  
5 Other specified hereditary haemolytic anaemias  
6 Other specified hereditary haemolytic anaemia NOS  
7 Hereditary haemolytic anaemia NOS  
8 Pyridoxine-responsive sideroblastic anaemia  
9 Sideroblastic anaemia NOS  
10 [X]Other anaemias due to enzyme disorders  
11 [X]Other specified hereditary haemolytic anaemias  
12 [X]Other sideroblastic anaemias  
13 Biermer's congenital pernicious anaemia  
14 Sideroblastic anaemia  
15 Congenital dyserythropoietic anaemia  
16 Glucose-6-phosphate dehydrogenase deficiency anaemia  
17 Congenital sideroblastic anaemia  
18 Congenital anaemia  
19 Congenital hypoplastic anaemia  
20 [M] Refractory anaemia with sideroblasts  
21 Hypoplastic anaemia - familial  
22 Fanconi's hypoplastic anaemia  
23 Fanconi's familial refractory anaemia  
24 Perinatal jaundice from hereditary haemolytic anaemias  
25 Refractory anaemia with sideroblasts  
26 History of sickle cell anaemia  
27 Thalassaemia major - Cooley's anaemia  
28 Sickle cell anaemia  
29 Sickle-cell anaemia NOS  
30 Sickle-cell anaemia of unspecified type  
31 Sickle cell anaemia with crisis  
32 Sickle cell anaemia with haemoglobin C disease  
33 Sickle-cell anaemia with haemoglobin D disease  
34 Sickle-cell anaemia with haemoglobin E disease  
35 Congenital dyshaematopoietic anaemia  
36 Congenital Heinz-body anaemia  
37 Mediterranean anaemia  
38 Mediterranean anaemia  
39 Haemolytic anaemia due glutathione metabolism disorder NOS  
40 Haemolytic anaemia due to glutathione metabolism disorder OS  
41 Haemolytic anaemia due to triose phosphate isomerase deficiency  
42 Hereditary haemolytic anaemia  
43 Other hered. haem. anaemias  
44 Refractory anaemia with ringed sideroblasts  
45 Congenital Heinz body haemolytic anaemia  
46 Fanconi's anaemia  
47 Fanconi anemia  
48 Sickle cell anaemia with haemoglobin E disease  
49 G6PD deficiency anemia  
50 Congenital dyserythropoietic anaemia, type II

1 Diamond-Blackfan anaemia  
2 Sickle cell anemia  
3 Refractory anaemia with sideroblasts  
4 Sickle cell anemia crisis  
5 Sickle cell anemia with crisis  
6 Familial hypercholanemia  
7 Severe congenital hypochromic sideroblastic anemia  
8 X chromosome-linked sideroblastic anaemia  
9 NHS Sickle Cell and Thalassaemia Screening Programme result consistent with sickle cell anaemia  
10 Chronic lymphoid leukaemia  
11 Lymphatic leukaemia  
12 Lymphoid leukaemia  
13 Subacute lymphoid leukaemia  
14 Other lymphoid leukaemia  
15 Aleukaemic lymphoid leukaemia  
16 Other lymphoid leukaemia NOS  
17 Lymphoid leukaemia NOS  
18 [M]Lymphoid leukaemias  
19 Acute lymphoblastic leukaemia - category  
20 [M]Subacute lymphoid leukaemia  
21 [M]Aleukaemic lymphoid leukaemia  
22 [M]Lymphosarcoma cell leukaemia  
23 [M]Lymphosarcoma cell leukaemia NOS  
24 [X]Other lymphoid leukaemia  
25 B-cell chronic lymphocytic leukaemia  
26 T-cell prolymphocytic leukaemia  
27 B-cell acute lymphoblastic leukaemia  
28 B-cell prolymphocytic leukaemia  
29 Acute lymphoid leukaemia  
30 [M]Prolymphocytic leukaemia  
31 [V]Personal history of lymphoid leukaemia  
32 [M]Lymphoid leukaemia NOS  
33 Prolymphocytic leukaemia  
34 Chronic lymphoid leukaemia  
35 [M]Lymphatic leukaemia  
36 [M]Lymphosarcoma cell leukaemias  
37 Lymphoid leukaemia  
38 Chronic lymphoid leukaemia, disease  
39 Lymphosarcoma cell leukaemia  
40 Lymphoid leukaemia - acute  
41 Lymphoid leukaemia - chronic  
42 Lymphoid leukaemia - subacute  
43 Prolymphocytic leukemia of T-cell type  
44 Prolymphocytic leukaemia of B-cell type  
45 Chronic lymphocytic leukaemia of B-cell type  
46 Clinical stage A chronic lymphocytic leukaemia  
47 Clinical stage B chronic lymphocytic leukaemia  
48 Clinical stage C chronic lymphocytic leukaemia  
49 Lymphocytic leukemia  
50 Lymphocytic leukaemia

1  
2 Chronic lymphocytic leukaemia  
3 Chronic lymphocytic leukemia  
4 Chronic lymphoid leukemia  
5 Chronic lymphatic leukemia  
6 Chronic lymphatic leukaemia  
7  
8 Chronic lymphocytic leukaemia, B-cell type  
9 Acute lymphoid leukemia  
10 ALL - Acute lymphoblastic leukaemia  
11 CLL - Chronic lymphocytic leukaemia  
12 CLL - Chronic lymphocytic leukemia  
13 Prolymphocytic leukemia, T-cell type  
14 Acute lymphoblastic leukemia  
15 Lymphoblastic leukaemia  
16 Acute lymphocytic leukaemia  
17 Acute lymphoblastic leukaemia  
18 Prolymphocytic leukaemia  
19 Lymphoid leukaemia (category)  
20 Subacute lymphoid leukemia  
21 B-CLL - B-cell chronic lymphocytic leukemia  
22 B-CLL - B-cell chronic lymphocytic leukaemia  
23 T-cell chronic lymphocytic leukaemia  
24 Chronic lymphocytic prolymphocytic leukaemia syndrome  
25 Large granular lymphocytic leukaemia  
26 LGLL - Large granular lymphocytic leukemia  
27 B-cell acute lymphoblastic leukemia  
28 Pre B-cell acute lymphoblastic leukaemia  
29 Common acute lymphoblastic leukaemia  
30 T-cell acute lymphoblastic leukaemia  
31 Acute lymphoblastic leukaemia, transitional pre-B-cell  
32 Leukaemic infiltration of skin (T-cell lymphoblastic leukaemia)  
33 Philadelphia chromosome-positive acute lymphoblastic leukaemia  
34 Philadelphia chromosome-positive acute lymphoblastic leukemia  
35 Smouldering chronic lymphocytic leukaemia  
36 T-cell large granular lymphocytic leukaemia  
37 Philadelphia chromosome-negative precursor B-cell acute lymphoblastic leukaemia  
38 B lymphoblastic leukaemia lymphoma with t(9;22) (q34;q11.2); BCR-ABL 1  
39 Chronic lymphocytic leukaemia genetic mutation variant  
40 Acute lymphoid leukaemia relapse  
41 History of chronic lymphocytic leukaemia  
42 Monoclonal B-cell lymphocytosis chronic lymphocytic leukaemia-type  
43 B lymphoblastic leukaemia lymphoma with t(5;14)(q31;q32); IL3-IGH  
44 Precursor B-cell acute lymphoblastic leukaemia  
45 Other types of follicular non-Hodgkin's lymphoma  
46 [X]Other types of follicular non-Hodgkin's lymphoma  
47 Follicular non-Hodgkin's small cleaved cell lymphoma  
48 Follicular non-Hodgkin's large cell lymphoma  
49 Follicular non-Hodgkin's lymphoma  
50 Diffuse follicle centre lymphoma  
51 Paediatric follicular lymphoma  
52 [M]Follicular lymphosarcoma NOS



1 [M]Giant follicular lymphoma  
2 Follicular lymphoma NOS  
3 Follicular non-Hodgkin's mixed small cleaved and large cell lymphoma  
4 Follicular lymphoma  
5 Follicular lymphoma grade 1  
6 Follicular lymphoma grade 2  
7 Follicular lymphoma grade 3  
8 Follicular lymphoma, cutaneous follicle centre  
9 Other types of follicular lymphoma  
10 Other non-follicular lymphoma  
11 Follicular lymphoma grade 3a  
12 Follicular lymphoma grade 3b  
13 Cutaneous follicle centre lymphoma  
14 Follicular lymphoma, grade 3  
15 Follicular lymphoma, grade 2  
16 Follicular lymphoma  
17 Follicular non-Hodgkin's lymphoma, mixed small cleaved cell and large cell (clinical)  
18 Follicular lymphoma grade 2  
19 Follicular non-Hodgkin's lymphoma, large cell (clinical)  
20 Follicular low grade B-cell lymphoma  
21 Follicular malignant lymphoma - mixed cell type  
22 Follicular malignant lymphoma - small cleaved cell  
23 Follicular malignant lymphoma - large cell  
24 Follicular non-Hodgkin lymphoma  
25 Primary cutaneous follicular centre B-cell lymphoma  
26 Primary cutaneous follicle centre cell lymphoma  
27 Primary cutaneous follicle center cell lymphoma  
28 Follicular non-Hodgkin's lymphoma of soft tissue  
29 Follicular non-Hodgkin's lymphoma of lung  
30 Follicular non-Hodgkin's lymphoma of skin  
31 Follicular non-Hodgkin's lymphoma of intestine  
32 Follicular non-Hodgkin's lymphoma diffuse follicle centre sub-type grade 1  
33 Follicular non-Hodgkin's lymphoma diffuse follicle centre cell sub-type grade 2  
34 Follicular non-Hodgkin's lymphoma of lymph nodes of multiple sites  
35 Homozygous alpha thalassaemia  
36 Thalassaemia  
37 F thalassaemia  
38 Homozygous beta thalassemia  
39 Double heterozygous for Hb S and beta thalassaemia  
40 beta Thalassaemia  
41 Beta thalassaemia syndrome  
42 Alpha thalassemia syndrome  
43 Delta-beta thalassemia  
44 Alpha thalassaemia X-linked intellectual disability syndrome  
45 beta<sup>0</sup> Thalassaemia deletion type  
46 Thalassemia with other hemoglobinopathy  
47 Delta-beta-Lepore thalassemia  
48 Sickle cell-beta<sup>0</sup>-thalassaemia  
49 HPFH delta beta<sup>0</sup> thalassaemia  
50 Sickle cell-thalassemia disease with crisis

1  
2 Thalassaemia with other haemoglobinopathy  
3 alpha<sup>0</sup> Thalassemia  
4 delta beta<sup>0</sup> Thalassemia  
5 beta<sup>0</sup> Thalassemia  
6 Maternal thalassemia in pregnancy  
7 delta Thalassemia  
8 Thalassaemia-haemoglobin S disease  
9 Beta 0 thalassaemia  
10 Hereditary persistence of fetal haemoglobin delta beta<sup>0</sup> thalassaemia  
11 Hereditary persistence of fetal hemoglobin delta beta<sup>0</sup> thalassemia  
12 epsilon gamma delta beta<sup>0</sup> Thalassemia  
13 Sickle cell thalassaemia disease  
14 epsilon gamma delta beta Thalassemia  
15 beta<sup>0</sup> Thalassemia nondeletion type  
16 Thalassaemia-haemoglobin C disease  
17 Sickle cell-thalassaemia disease with crisis  
18 Sickle cell-thalassaemia disease without crisis  
19 Hemoglobin E/beta thalassemia disease  
20 Thalassemia in mother complicating childbirth  
21 Thalassemia-hemoglobin C disease  
22 delta<sup>0</sup> Thalassaemia  
23 Sickle cell thalassemia disease  
24 Sickle cell-delta beta<sup>0</sup>-thalassaemia  
25 Alpha thalassemia X-linked intellectual disability syndrome  
26 Alpha thalassaemia syndrome  
27 Haemoglobin S/beta thalassaemia  
28 Beta thalassaemia major  
29 Double heterozygous for Hb E and beta thalassemia  
30 Alpha thalassemia X-linked intellectual deficit  
31 Hb Lepore thalassemia  
32 Hereditary persistence of fetal haemoglobin thalassaemia  
33 Delta thalassemia  
34 Alpha thalassemia-mental retardation syndrome  
35 delta beta<sup>0</sup> Thalassaemia  
36 Beta 0 thalassemia  
37 Alpha thalassaemia X-linked intellectual deficit  
38 Hereditary persistence of foetal haemoglobin thalassaemia  
39 Alpha thalassaemia intellectual disability syndrome deletion type  
40 Homozygous alpha thalassemia  
41 Alpha thalassemia major  
42 beta Thalassemia  
43 Thalassemia major  
44 Sickle cell-beta-thalassaemia  
45 Homozygous thalassemia  
46 Sickle cell-beta-thalassemia  
47 Thalassaemia major - Cooley's anaemia  
48 [X]Other thalassaemias  
49 Thalassaemias  
50 Delta-beta thalassaemia  
51 alpha<sup>0</sup> Thalassaemia

1 Double heterozygous for Hb E and beta thalassaemia  
2 Hereditary persistence of fetal hemoglobin thalassaemia  
3  $\alpha\alpha$ gamma delta beta<sup>0</sup> thalassaemia  
4 Maternal thalassaemia in childbirth  
5 delta Thalassaemia  
6 Alpha thalassaemia intellectual disability syndrome deletion type  
7 Sickle cell trait with coexistent alpha-thalassaemia  
8 Sickle cell anemia with coexistent alpha-thalassaemia  
9 Thalassaemia syndrome  
10 Thalassaemia in mother complicating childbirth  
11 Alpha-thalassaemia intellectual disability syndrome linked to chromosome 16  
12 Alpha-beta thalassaemia  
13 Beta zero thalassaemia  
14 Sickle cell-beta<sup>0</sup>-thalassaemia  
15 Sickle cell anaemia with coexistent alpha-thalassaemia  
16 Thalassaemia-hemoglobin S disease  
17 Beta thalassaemia  
18 delta beta Thalassaemia  
19 Homozygous beta thalassaemia  
20 delta beta Thalassaemia  
21 Thalassaemia with haemoglobin S disease  
22 epsilon gamma delta beta Thalassaemia  
23 beta<sup>0</sup> Thalassaemia  
24 Alpha thalassaemia-mental retardation syndrome  
25 Delta-beta-Lepore thalassaemia  
26 HPFH delta beta<sup>0</sup> thalassaemia  
27 beta<sup>0</sup> Thalassaemia deletion type  
28 Hereditary persistence of fetal hemoglobin (HPFH) delta beta<sup>0</sup> thalassaemia  
29 Beta thalassaemia X-linked thrombocytopenia syndrome  
30 Sickle cell-thalassaemia disease without crisis  
31 Sickle cell-delta beta<sup>0</sup>-thalassaemia  
32 Maternal thalassaemia in pregnancy  
33 alpha Thalassaemia  
34 Thalassaemia with hemoglobin S disease  
35 Double heterozygous for Hb S and beta thalassaemia  
36 Inclusion body beta-thalassaemia  
37 Sickle cell-thalassaemia disease  
38 Dominant beta-thalassaemia  
39  $\alpha\alpha$ gamma delta beta<sup>0</sup> thalassaemia  
40 Inclusion body beta-thalassaemia  
41 Thalassaemia in mother complicating pregnancy  
42 Gamma thalassaemia  
43 Thalassaemia in mother complicating pregnancy  
44 Alpha-beta thalassaemia  
45 NHS Sickle Cell and Thalassaemia Screening Programme result consistent with sickle cell beta-thalassaemia  
46 Beta zero thalassaemia  
47 Hemoglobin S/beta thalassaemia  
48 Thalassaemia  
49 Beta thalassaemia syndrome  
50 beta<sup>0</sup> Thalassaemia nondeletion type

1 Hb Lepore thalassaemia  
2 Gamma thalassaemia  
3 NHS Sickle Cell and Thalassaemia Screening Programme result consistent with Hb (haemoglobin) variant and/c  
4 Thalassaemia major  
5 Thalassaemia syndrome  
6 Alpha-thalassaemia intellectual disability syndrome linked to chromosome 16  
7 Sickle cell-thalassaemia disease  
8 epsilon gamma delta beta<sup>0</sup> Thalassaemia  
9 Hereditary persistence of foetal haemoglobin (HPFH) delta beta<sup>0</sup> thalassaemia  
10 Sickle cell trait with coexistent alpha-thalassaemia  
11 delta<sup>0</sup> Thalassaemia  
12 alpha Thalassaemia  
13 Alpha thalassaemia major  
14 Maternal thalassaemia in childbirth  
15 Homozygous thalassaemia  
16 F thalassaemia  
17 Thalassaemia NOS  
18 Beta thalassaemia  
19 Dominant beta-thalassaemia  
20 Delta thalassaemia  
21 Beta thalassaemia X-linked thrombocytopenia syndrome  
22 Haemoglobin E/beta thalassaemia disease  
23 Cooley's anemia  
24 Cooley's anaemia  
25 Mediterranean anaemia  
26 Mediterranean anaemia  
27 Haemoglobin Barts hydrops  
28 Haemoglobin Bart's hydrops syndrome  
29 Haemoglobin Bart  
30 Haemoglobin Bart hydrops syndrome  
31 Haemoglobin Bart's disease  
32 Haemoglobin Barts  
33 Haemoglobin Barts identification  
34 Hb - Haemoglobin Barts  
35 Hemoglobin Barts hydrops  
36 Hemoglobin Bart's hydrops syndrome  
37 Hb - Hemoglobin Barts  
38 Hemoglobin Bart hydrops syndrome  
39 Hemoglobin Barts  
40 Hemoglobin Bart  
41 Hemoglobin Bart's disease  
42 Hemoglobin Barts identification

1  
2  
3  
4  
5  
6  
7  
8  
9  
10  
11  
12  
13  
14  
15  
16  
17  
18  
19  
20  
21  
22  
23  
24  
25  
26  
27  
28  
29  
30  
31  
32  
33  
34  
35  
36  
37  
38  
39  
40  
41  
42  
43  
44  
45  
46  
47  
48  
49  
50  
51  
52  
53  
54  
55  
56  
57  
58  
59  
60

For peer review only

1  
2  
3  
4  
5  
6  
7  
8  
9  
10  
11  
12  
13  
14  
15  
16  
17  
18  
19  
20  
21  
22  
23  
24  
25  
26  
27  
28  
29  
30  
31  
32  
33  
34  
35  
36  
37  
38  
39  
40  
41  
42  
43  
44  
45  
46  
47  
48  
49  
50  
51  
52  
53  
54  
55  
56  
57  
58  
59  
60

For peer review only

1  
2  
3  
4  
5  
6  
7  
8  
9  
10  
11  
12  
13  
14  
15  
16  
17  
18  
19  
20  
21  
22  
23  
24  
25  
26  
27  
28  
29  
30  
31  
32  
33  
34  
35  
36  
37  
38  
39  
40  
41  
42  
43  
44  
45  
46  
47  
48  
49  
50  
51  
52  
53  
54  
55  
56  
57  
58  
59  
60

For peer review only

1  
2  
3  
4  
5  
6  
7  
8  
9  
10  
11  
12  
13  
14  
15  
16  
17  
18  
19  
20  
21  
22  
23  
24  
25  
26  
27  
28  
29  
30  
31  
32  
33  
34  
35  
36  
37  
38  
39  
40  
41  
42  
43  
44  
45  
46  
47  
48  
49  
50  
51  
52  
53  
54  
55  
56  
57  
58  
59  
60

For peer review only



1  
2  
3  
4  
5  
6  
7  
8  
9  
10  
11  
12  
13  
14  
15  
16  
17  
18  
19  
20  
21  
22  
23  
24  
25  
26  
27  
28  
29  
30  
31  
32  
33  
34  
35  
36  
37  
38  
39  
40  
41  
42  
43  
44  
45  
46  
47  
48  
49  
50  
51  
52  
53  
54  
55  
56  
57  
58  
59  
60

For peer review only

1  
2  
3  
4  
5  
6  
7  
8  
9  
10  
11  
12  
13  
14  
15  
16  
17  
18  
19  
20  
21  
22  
23  
24  
25  
26  
27  
28  
29  
30  
31  
32  
33  
34  
35  
36  
37  
38  
39  
40  
41  
42  
43  
44  
45  
46  
47  
48  
49  
50  
51  
52  
53  
54  
55  
56  
57  
58  
59  
60

For peer review only

1  
2  
3  
4  
5  
6  
7  
8  
9  
10  
11  
12  
13  
14  
15  
16  
17  
18  
19  
20  
21  
22  
23  
24  
25  
26  
27  
28  
29  
30  
31  
32  
33  
34  
35  
36  
37  
38  
39  
40  
41  
42  
43  
44  
45  
46  
47  
48  
49  
50  
51  
52  
53  
54  
55  
56  
57  
58  
59  
60

For peer review only

1  
2  
3  
4  
5  
6  
7  
8  
9  
10  
11  
12  
13  
14  
15  
16  
17  
18  
19  
20  
21  
22  
23  
24  
25  
26  
27  
28  
29  
30  
31  
32  
33  
34  
35  
36  
37  
38  
39  
40  
41  
42  
43  
44  
45  
46  
47  
48  
49  
50  
51  
52  
53  
54  
55  
56  
57  
58  
59  
60

For peer review only

1  
2  
3  
4  
5  
6  
7  
8  
9  
10  
11  
12  
13  
14  
15  
16  
17  
18  
19  
20  
21  
22  
23  
24  
25  
26  
27  
28  
29  
30  
31  
32  
33  
34  
35  
36  
37  
38  
39  
40  
41  
42  
43  
44  
45  
46  
47  
48  
49  
50  
51  
52  
53  
54  
55  
56  
57  
58  
59  
60

For peer review only

1  
2  
3  
4  
5  
6  
7  
8  
9  
10  
11  
12  
13  
14  
15  
16  
17  
18  
19  
20  
21  
22  
23  
24  
25  
26  
27  
28  
29  
30  
31  
32  
33  
34  
35  
36  
37  
38  
39  
40  
41  
42  
43  
44  
45  
46  
47  
48  
49  
50  
51  
52  
53  
54  
55  
56  
57  
58  
59  
60

For peer review only

1  
2  
3  
4  
5  
6  
7  
8  
9  
10  
11  
12  
13  
14  
15  
16  
17  
18  
19  
20  
21  
22  
23  
24  
25  
26  
27  
28  
29  
30  
31  
32  
33  
34  
35  
36  
37  
38  
39  
40  
41  
42  
43  
44  
45  
46  
47  
48  
49  
50  
51  
52  
53  
54  
55  
56  
57  
58  
59  
60

emia

For peer review only

## ICD-10 code Term

|    |                                                                                  |
|----|----------------------------------------------------------------------------------|
| 1  |                                                                                  |
| 2  | ICD-10 code Term                                                                 |
| 3  | E85.0 Non-neuropathic hereditary amyloidosis                                     |
| 4  | E85.1 Neuropathic hereditary amyloidosis                                         |
| 5  | E85.2 Hereditary amyloidosis, unspecified                                        |
| 6  | E85.4 Organ-limited amyloidosis                                                  |
| 7  | E85.8 Other amyloidosis                                                          |
| 8  | E85.9 Amyloidosis, unspecified                                                   |
| 9  | D89.81 Graft-versus-host disease                                                 |
| 10 | D89.810 Acute graft-versus-host disease                                          |
| 11 | D89.811 Chronic graft-versus-host disease                                        |
| 12 | D89.812 Acute on chronic graft-versus-host disease                               |
| 13 | D89.813 Graft-versus-host disease, unspecified                                   |
| 14 | D46 Myelodysplastic Syndromes                                                    |
| 15 | D46.6 Myelodysplastic syndrome with isolated del(5q) chromosomal abnormality     |
| 16 | D46.7 Other myelodysplastic syndromes                                            |
| 17 | D46.9 Myelodysplastic syndrome, unspecified                                      |
| 18 | C93.1 Chronic Myelomonocytic Leukaemia                                           |
| 19 | C93.10 Chronic myelomonocytic leukemia not having achieved remission             |
| 20 | C93.11 Chronic myelomonocytic leukemia, in remission                             |
| 21 | C93.12 Chronic myelomonocytic leukemia, in relapse                               |
| 22 | D57 Sickle-Cell Disorders                                                        |
| 23 | D57.0 Sickle-cell anaemia with crisis                                            |
| 24 | D57.1 Sickle-cell anaemia without crisis                                         |
| 25 | D57.2 Double heterozygous sickling disorders                                     |
| 26 | D57.8 Other sickle-cell disorders                                                |
| 27 | C90 Multiple myeloma and malignant plasma cell neoplasms                         |
| 28 | C90.0 Multiple myeloma                                                           |
| 29 | D75.81 Myelofibrosis                                                             |
| 30 | D64.0 Hereditary sideroblastic anaemia                                           |
| 31 | D64.3 Other sideroblastic anaemias                                               |
| 32 | D64.4 Congenital dyserythropoietic anaemia                                       |
| 33 | C91.1 Chronic lymphocytic leukaemia of B-cell type                               |
| 34 | C91.10 Chronic lymphocytic leukemia of B-cell type not having achieved remission |
| 35 | C91.11 Chronic lymphocytic leukemia of B-cell type in remission                  |
| 36 | C91.12 Chronic lymphocytic leukemia of B-cell type in relapse                    |
| 37 | C82 Follicular lymphoma                                                          |
| 38 | C82.0 Follicular lymphoma grade I                                                |
| 39 | C82.1 Follicular lymphoma grade II                                               |
| 40 | C82.2 Follicular lymphoma grade III, unspecified                                 |
| 41 | C82.3 Follicular lymphoma grade IIIa                                             |
| 42 | C82.4 Follicular lymphoma grade IIIb                                             |
| 43 | C82.5 Diffuse follicle centre lymphoma                                           |
| 44 | C82.6 Cutaneous follicle centre lymphoma                                         |
| 45 | C82.7 Other types of follicular lymphoma                                         |
| 46 | C82.9 Follicular lymphoma, unspecified                                           |
| 47 | D56 Thalassaemia                                                                 |
| 48 | D56.0 Alpha thalassaemia                                                         |
| 49 | D56.1 Beta thalassaemia                                                          |
| 50 | D56.2 Delta-beta thalassaemia                                                    |
| 51 | D56.4 Hereditary persistence of fetal haemoglobin [HPFH]                         |



1  
2  
3  
4  
5  
6  
7  
8  
9  
10  
11  
12  
13  
14  
15  
16  
17  
18  
19  
20  
21  
22  
23  
24  
25  
26  
27  
28  
29  
30  
31  
32  
33  
34  
35  
36  
37  
38  
39  
40  
41  
42  
43  
44  
45  
46  
47  
48  
49  
50  
51  
52  
53  
54  
55  
56  
57  
58  
59  
60

- D56.8 Other thalassaemias
- D56.9 Thalassaemia, unspecified
- D57.2 Double heterozygous sickling disorders
- T86.0 Bone-marrow transplant rejection Graft-versus-host reaction or disease

For peer review only

1  
2 Procodeid  
3 101401000006116  
4 101681000006111  
5 116189017  
6 12019901000006119  
7 12019921000006112  
8 12019931000006110  
9 120401000006119  
10 1231220012  
11 12452201000006118  
12 12452211000006115  
13 12458831000006112  
14 12477161000006113  
15 12482201000006111  
16 12482541000006110  
17 12483091000006117  
18 12489381000006119  
19 12716091000006116  
20 12716541000006118  
21 12716551000006116  
22 12719911000006119  
23 12762331000006115  
24 140251000006119  
25 140261000006117  
26 1488598017  
27 1488599013  
28 1488606017  
29 1488620012  
30 1488636014  
31 1488637017  
32 1488773015  
33 1488774014  
34 1488795016  
35 1490935011  
36 1545611000006118  
37 1545961000006110  
38 1551691000000115  
39 1554871000006110  
40 1554881000006113  
41 1554891000006111  
42 1554901000006110  
43 1554911000006113  
44 1554921000006117  
45 1554931000006119  
46 1554941000006112  
47 1554951000006114  
48 1554961000006111  
49 1554971000006116  
50 1554981000006118  
51 1554991000006115

For peer review only

1  
2 1555001000006110  
3 1555011000006113  
4 1555021000006117  
5 1555041000006112  
6 1555061000006111  
7 1555071000006116  
8 1555081000006118  
9 1555691000006113  
10 1555701000006113  
11 1555711000006111  
12 1555721000006115  
13 1555731000006117  
14 1556631000006116  
15 1703251000006111  
16 1703271000006118  
17 1703281000006115  
18 1703291000006117  
19 1703501000006114  
20 1703511000006112  
21 1778767018  
22 1779731000006118  
23 1786803010  
24 1805911000006118  
25 1822101000006117  
26 189731000006115  
27 190041000006116  
28 190051000006119  
29 190061000006117  
30 190071000006112  
31 190081000006110  
32 190091000006113  
33 190101000006119  
34 190111000006116  
35 190501000006114  
36 190511000006112  
37 1906351000006116  
38 1906641000006111  
39 1906671000006115  
40 1906681000006117  
41 190831000006115  
42 190841000006113  
43 190851000006110  
44 190861000006112  
45 190871000006117  
46 190881000006119  
47 190891000006116  
48 190901000006117  
49 190911000006119  
50 190921000006110  
51 190931000006113

For peer review only

1  
2 190941000006115  
3 190951000006118  
4 190961000006116  
5 190991000006112  
6 191001000006113  
7 191011000006111  
8 191021000006115  
9 191031000006117  
10 191041000006110  
11 191051000006112  
12 191061000006114  
13 191071000006119  
14 191091000006118  
15 191101000006112  
16 191111000006110  
17 191171000006118  
18 191181000006115  
19 191251000006115  
20 191261000006118  
21 191301000006110  
22 214161000006113  
23 214171000006118  
24 214181000006115  
25 214191000006117  
26 214201000006119  
27 214211000006116  
28 214221000006112  
29 214241000006117  
30 214251000006115  
31 214261000006118  
32 214271000006113  
33 214281000006111  
34 2156761000000117  
35 2189111000000116  
36 2310961000000118  
37 2310981000000110  
38 261675013  
39 261676014  
40 261677017  
41 261679019  
42 261694015  
43 261695019  
44 261696018  
45 261697010  
46 261700014  
47 262450015  
48 262753019  
49 262757018  
50 262760013  
51 262762017

For peer review only

1  
2 262763010  
3 262764016  
4 262765015  
5 262766019  
6 262768018  
7 262771014  
8 262772019  
9 262776016  
10 262777013  
11 262778015  
12 262779011  
13 262780014  
14 262781013  
15 262792014  
16 262794010  
17 262795011  
18 262797015  
19 262799017  
20 262805011  
21 262806012  
22 262816016  
23 262819011  
24 262820017  
25 262860016  
26 262869015  
27 262871015  
28 262881016  
29 262883018  
30 262895018  
31 262896017  
32 266092016  
33 266297018  
34 266761014  
35 2674520012  
36 2675453010  
37 2675983014  
38 2676221013  
39 2676228019  
40 2676252014  
41 2693115017  
42 273442015  
43 273825017  
44 275550012  
45 279146017  
46 2826771000006112  
47 283540016  
48 284199015  
49 294201016  
50 294202011  
51 29938100000111  
52  
53  
54  
55  
56  
57  
58  
59  
60

For peer review only

1  
2 3034301000006118  
3 3034341000006116  
4 3119241000006112  
5 3119251000006114  
6 3238841000006110  
7  
8 324069016  
9 329146019  
10 335976013  
11 3366721000006110  
12  
13 342844011  
14 347303012  
15 372501000000116  
16 372521000000113  
17 372601000000117  
18 373141000000116  
19 373681000000115  
20 373701000000118  
21 380141000000118  
22 380261000000112  
23 380782018  
24  
25 381921000000119  
26 381941000000114  
27 381961000000110  
28 381981000000118  
29 382001000000118  
30 382021000000110  
31 382041000000115  
32 382061000000119  
33 382081000000111  
34 385761000000110  
35 385801000000117  
36 385821000000114  
37 387331000000112  
38 387371000000114  
39 387451000000112  
40 387871000000117  
41 387891000000118  
42 394636013  
43 394637016  
44 394638014  
45 397167015  
46 399239014  
47 399240011  
48 399241010  
49 399401000000115  
50 406009010  
51 406010017  
52 406048010  
53 4152971000006111  
54 4218171000006116  
55  
56  
57  
58  
59  
60

For peer review only

1  
2 42541000006112  
3 453168018  
4 460119017  
5 460934012  
6 460935013  
7 460942013  
8 461426018  
9  
10 4614481000006117  
11 4614501000006110  
12 4614521000006117  
13 4614561000006111  
14 4614571000006116  
15 4614581000006118  
16 4614591000006115  
17 4614601000006111  
18 4614611000006114  
19 4614621000006118  
20 4614631000006115  
21 4614641000006113  
22 4621461000006115  
23 4621471000006110  
24 4621481000006113  
25 4621491000006111  
26 4621511000006117  
27 4621521000006113  
28 4621541000006118  
29 4621551000006116  
30 4621621000006112  
31 4621791000006119  
32 4621801000006118  
33 4621821000006111  
34 4621831000006114  
35 4621871000006112  
36 4621891000006113  
37 4621901000006112  
38 4621911000006110  
39 4621921000006119  
40 4621931000006116  
41 4621941000006114  
42 4621971000006118  
43 4621981000006115  
44 4622001000006115  
45 4622011000006117  
46 4622021000006113  
47 4622051000006116  
48 4622061000006119  
49 4622071000006114  
50 4622081000006112  
51 4622091000006110  
52 4622101000006116

For peer review only

1 4622111000006118  
2 4622121000006114  
3 4622131000006112  
4 4622141000006119  
5 4622151000006117  
6 4622161000006115  
7 4622171000006110  
8 4622181000006113  
9 4622191000006111  
10 4622211000006112  
11 4622221000006116  
12 4622231000006118  
13 4622241000006111  
14 4622251000006113  
15 4622271000006115  
16 4622281000006117  
17 4622291000006119  
18 4622301000006118  
19 4622311000006115  
20 4622321000006111  
21 4622331000006114  
22 4622351000006119  
23 4622361000006117  
24 4622411000006113  
25 4622421000006117  
26 4622431000006119  
27 4622441000006112  
28 4622451000006114  
29 4622461000006111  
30 4622471000006116  
31 4622491000006115  
32 4622511000006114  
33 4622521000006118  
34 4622531000006115  
35 4622541000006113  
36 4622551000006110  
37 4622561000006112  
38 4622571000006117  
39 4622581000006119  
40 4622601000006112  
41 4645851000006119  
42 4648921000006112  
43 4649041000006111  
44 4681021000006111  
45 4723571000006118  
46 473401000006110  
47 473411000006113  
48 473431000006119  
49 473441000006112  
50 473451000006114

For peer review only



1  
2 473461000006111  
3 473471000006116  
4 473481000006118  
5 4761861000006117  
6 4761871000006112  
7 4761891000006113  
8 4761901000006112  
9 490611000000119  
10 4908911000006112  
11 490957014  
12 491111000000116  
13 494336018  
14 4983201000006114  
15 499301000000117  
16 501450016  
17 5027101000006117  
18 5027111000006119  
19 5081621000006116  
20 511991000000117  
21 520431000006117  
22 520651000006114  
23 5501071000006114  
24 5501081000006112  
25 5523011000006114  
26 55721000006115  
27 574211000006119  
28 574371000006119  
29 586281000006110  
30 6296861000006114  
31 6427181000006118  
32 6427191000006115  
33 6427201000006117  
34 6427211000006119  
35 6427231000006113  
36 6427241000006115  
37 6427251000006118  
38 6548701000006116  
39 6548781000006113  
40 657671000006110  
41 657681000006113  
42 657691000006111  
43 657701000006111  
44 658081000006115  
45 658421000006110  
46 6616241000006114  
47 6620751000006112  
48 6620761000006114  
49 6620771000006119  
50 6620791000006118  
51 6620801000006117

For peer review only

1  
2 7357461000006114  
3 7357471000006119  
4 7357481000006116  
5 743561000006118  
6 745331000000110  
7 746271000000114  
8 746511000006113  
9 747711000000111  
10 747731000000115  
11 747811000000118  
12 747831000000114  
13 747851000000119  
14 747871000000111  
15 747901000000111  
16 747921000000119  
17 747941000000114  
18 747961000000110  
19 747981000000118  
20 748001000000113  
21 748661000000116  
22 748681000000113  
23 748701000000110  
24 748721000000118  
25 748741000000113  
26 748761000000114  
27 748781000000117  
28 749001000000117  
29 749511000000113  
30 767591000006111  
31 767601000006115  
32 768011000006114  
33 770011000006117  
34 770021000006113  
35 770521000006118  
36 770531000006115  
37 770541000006113  
38 771081000006118  
39 787881000006114  
40 798261000006118  
41 8072991000006115  
42 815021000006112  
43 819341000006117  
44 878841000006110  
45 900891000006117  
46 907311000006115  
47 9851141000033117  
48 475141000033116  
49 548141000033117  
50 920741000033111  
51 391341000033118

For peer review only

1  
2 1430841000033118  
3 395141000033118  
4 8614041000033119  
5 8614141000033115  
6 256041000033110  
7  
8 586541000033115  
9 750241000033113  
10 255941000033117  
11 255241000033114  
12  
13 1608041000033116  
14 9850841000033118  
15 392041000033113  
16 256141000033114  
17 255141000033119  
18 391641000033114  
19 391741000033117  
20 391141000033116  
21 391541000033113  
22 391941000033119  
23 885441000033112  
24 474941000033115  
25 196141000033116  
26 1891841000033112  
27 395341000033115  
28 255741000033115  
29 391241000033111  
30 4907641000033116  
31 1891941000033116  
32 8963541000033110  
33 8963341000033115  
34 8963641000033111  
35 8963041000033117  
36 8962941000033110  
37 8963241000033113  
38 8963141000033118  
39 8963441000033114  
40 12198241000033110  
41 12198341000033117  
42 4259741000033112  
43 4259841000033119  
44 4157141000033115  
45 4157241000033110  
46 11695941000033111  
47 11696041000033118  
48 8193041000033117  
49 8193241000033113  
50 8193341000033115  
51 8193141000033118  
52 4954641000033115  
53 4954741000033112

For peer review only

1  
2 3269141000033118  
3 3268841000033118  
4 3268941000033114  
5 3269041000033117  
6 2717041000033110  
7 2717141000033114  
8 3138941000033115  
9 3139041000033112  
10 8581041000033111  
11 8581241000033115  
12 8581341000033113  
13 8581141000033110  
14 8197241000033116  
15 3083841000033118  
16 3012541000033111  
17 947341000033112  
18 3083741000033111  
19 9851041000033116  
20 11800041000033110  
21 9850741000033111  
22 11807741000033112  
23 11800141000033114  
24 11799941000033116  
25 11800241000033119  
26 11807641000033115  
27 2271141000033116  
28 9158341000033117  
29 2270941000033113  
30 2270841000033117  
31 2271041000033115  
32 196041000033115  
33 6138541000033119  
34 196941000033119  
35 1035541000033115  
36 196841000033110  
37 10955641000033118  
38 10955741000033110  
39 12037141000033115  
40 3059241000033110  
41 3059341000033117  
42 148541000033118  
43 7860141000033114  
44 7860241000033119  
45 10642541000033111  
46 10642441000033110  
47 3152841000033114  
48 3152741000033116  
49 825641000033117  
50 825741000033114  
51 248341000033110

For peer review only

1  
2 248441000033116  
3 3097441000033111  
4 3872441000033118  
5 3872641000033116  
6 3872941000033111  
7 3872541000033117  
8 12398041000033110  
9 274741000033119  
10 822741000033117  
11 4156641000033110  
12 4156541000033114  
13 12398141000033114  
14 3952941000033115  
15 3952841000033111  
16 10974641000033119  
17 10974541000033115  
18 386541000033117  
19 535541000033117  
20 8200041000033113  
21 8199841000033110  
22 8199941000033119  
23 8200141000033112  
24 523041000033113  
25 395241000033113  
26 10217041000033110  
27 4156041000033116  
28 4156141000033117  
29 390241000033116  
30 390341000033114  
31 390141000033111  
32 2090341000033111  
33 3057441000033119  
34 3898641000033113  
35 12195941000033113  
36 3057341000033113  
37 12195841000033117  
38 2090241000033118  
39 3898541000033112  
40 2090041000033114  
41 2090141000033113  
42 8947641000033114  
43 8947541000033113  
44 8947741000033117  
45 8947441000033112  
46 10388241000033111  
47 485641000033118  
48 10388341000033118  
49 421941000033118  
50 423841000033110  
51 4040741000033110

For peer review only

1  
2 3857341000033112  
3 333041000033113  
4 11693941000033112  
5 11694241000033118  
6 11694041000033114  
7 11694141000033113  
8 3994241000033113  
9 3994341000033115  
10 3994541000033110  
11 3994641000033111  
12 3994441000033114  
13 3994741000033119  
14 404741000033113  
15 404541000033117  
16 404641000033116  
17 8196341000033112  
18 8196241000033119  
19 4156941000033115  
20 4212641000033116  
21 4212741000033113  
22 4157041000033119  
23 9293441000033110  
24 474341000033119  
25 474441000033113  
26 6117341000033119  
27 1405941000033112  
28 10267341000033111  
29 9293541000033111  
30 6058941000033117  
31 10267541000033116  
32 5844941000033112  
33 5845241000033116  
34 6067041000033112  
35 6117141000033117  
36 1406041000033119  
37 6067141000033111  
38 6117241000033112  
39 10267441000033117  
40 5845041000033112  
41 5845141000033111  
42 4955741000033113  
43 4292641000033117  
44 4452841000033111  
45 4374741000033117  
46 2590141000033110  
47 4452741000033118  
48 2590041000033111  
49 5845441000033115  
50 2590241000033115  
51 3964641000033114

For peer review only

1  
2 2589941000033118  
3 8838441000033117  
4 4374841000033110  
5 2038241000033112  
6 2212841000033110  
7  
8 7877941000033115  
9 7877841000033111  
10 11667741000033115  
11 11667641000033112  
12  
13 11667541000033111  
14 11667441000033110  
15 2746241000033110  
16 3997641000033116  
17 1073541000033119  
18 2746341000033117  
19  
20 531841000033117  
21 531741000033110  
22 529241000033119  
23 529041000033110  
24 1073641000033118  
25 1077441000033114  
26 1073741000033110  
27 1077341000033115  
28 529341000033112  
29 6167441000033114  
30 6167541000033110  
31 3347941000033110  
32 3348041000033113  
33 3348241000033117  
34 3348141000033112  
35 540541000033112  
36 540641000033113  
37 2642041000033114  
38 547341000033118  
39 2642141000033113  
40 3983641000033110  
41 1506441000033117  
42 1506341000033111  
43 3983741000033118  
44 547541000033113  
45 4061141000033114  
46 4453741000033111  
47 1607941000033119  
48 12188941000033117  
49 6470841000033117  
50 12189441000033117  
51 12188741000033115  
52 5292841000033112  
53 12189541000033116  
54 10334741000033117

For peer review only

1  
2 10334441000033112  
3 12189241000033118  
4 10334841000033110  
5 5292741000033119  
6 6471741000033117  
7  
8 10334241000033111  
9 5292541000033110  
10 10334641000033114  
11 12189141000033113  
12 9118141000033112  
13 5292641000033111  
14 8233141000033111  
15 6471241000033111  
16 10334541000033113  
17 4374441000033112  
18 4374341000033118  
19 2258141000033111  
20 2258241000033116  
21 586441000033116  
22 579141000033110  
23 2799741000033116  
24 587041000033110  
25 2799841000033114  
26 2799641000033113  
27 2799541000033112  
28 587541000033117  
29 587141000033114  
30 5264741000033112  
31 5264641000033115  
32 11757341000033115  
33 630441000033119  
34 5976141000033112  
35 11665641000033118  
36 630641000033117  
37 11757541000033110  
38 11757441000033114  
39 11665541000033119  
40 5886241000033115  
41 630541000033118  
42 11757741000033119  
43 630341000033113  
44 11665441000033115  
45 11757641000033111  
46 7860541000033117  
47 7860641000033116  
48 3092941000033116  
49 728841000033110  
50 10013741000033113  
51 10012941000033117  
52 749941000033114

For peer review only



1  
2 749841000033118  
3 1548941000033115  
4 1547741000033117  
5 1547941000033119  
6 749441000033116  
7  
8 1547841000033110  
9 749341000033110  
10 1548841000033111  
11 749241000033117  
12  
13 9703941000033112  
14 914141000033114  
15 750041000033117  
16 914041000033110  
17 750141000033118  
18 3050641000033118  
19 3050541000033119  
20 3177241000033114  
21 3177341000033116  
22 6428241000033115  
23 6428341000033113  
24 5355141000033111  
25 12185841000033116  
26 194941000033112  
27 4519141000033112  
28 775041000033114  
29 12185941000033112  
30 4519241000033117  
31 775141000033113  
32 194841000033116  
33 12330541000033110  
34 12330141000033118  
35 12330241000033113  
36 12330441000033114  
37 12330341000033115  
38 12330041000033117  
39 4522841000033118  
40 4522941000033114  
41 4188241000033115  
42 4187841000033117  
43 8839241000033114  
44 10494841000033114  
45 4187541000033119  
46 4188141000033110  
47 8839141000033119  
48 10494541000033112  
49 4187641000033118  
50 10494741000033116  
51 4187741000033110  
52 4188041000033111  
53 4187941000033113

For peer review only

1  
2 10494641000033113  
3 10488241000033116  
4 11781741000033116  
5 11781841000033114  
6 10488341000033114  
7 10488541000033119  
8 10488441000033115  
9  
10 841641000033116  
11 841741000033113  
12  
13 903741000033112  
14 38541000033110  
15 38641000033111  
16 901641000033116  
17 2012141000033113  
18 2012241000033118  
19 899041000033116  
20 899141000033117  
21 1495241000033117  
22 4202841000033118  
23 4957041000033116  
24 1495141000033112  
25 4202941000033114  
26 913741000033110  
27 913841000033117  
28 913941000033113  
29 914441000033118  
30 2617241000033110  
31 915041000033111  
32 914941000033111  
33 2659941000033117  
34 3922341000033115  
35 3922241000033113  
36 2157041000033111  
37 3097241000033110  
38 3097341000033117  
39 2157141000033110  
40 3097141000033115  
41 2156941000033110  
42 11492541000033114  
43 11492141000033117  
44 4269341000033118  
45 4269441000033112  
46 4507541000033111  
47 4507641000033112  
48 10213141000033116  
49 10213241000033111  
50 10212841000033117  
51 10213041000033115  
52 10492141000033113  
53 10491841000033111

For peer review only

1  
2 10491941000033115  
3 10491741000033118  
4 10371941000033118  
5 10371741000033116  
6 12352841000033112  
7 12352741000033119  
8 12043541000033115  
9 12042941000033115  
10 11580041000033110  
11 11579841000033115  
12 11579741000033113  
13 11579941000033111  
14 4011441000033117  
15 1892041000033110  
16 3870741000033112  
17 4024741000033117  
18 3870641000033115  
19 3870841000033119  
20 4024841000033110  
21 4595041000033114  
22 1892141000033114  
23 4011541000033116  
24 3870941000033110  
25 1753741000033111  
26 1029541000033115  
27 3952141000033117  
28 1404241000033119  
29 3201541000033110  
30 3201641000033111  
31 1747941000033115  
32 7680641000033112  
33 4907741000033113  
34 11822741000033116  
35 11822841000033114  
36 11822941000033118  
37 11822541000033112  
38 11823041000033111  
39 11822641000033113  
40 3859041000033118  
41 3859141000033119  
42 4429441000033119  
43 4429341000033113  
44 4806041000033116  
45 4806141000033117  
46 11275641000033114  
47 11275841000033110  
48 11275541000033113  
49 11275741000033117  
50 11275341000033118  
51 11275441000033112

For peer review only

1 5833241000033118  
2 5832241000033113  
3 5832141000033118  
4 5832941000033116  
5 12292141000033119  
6 12292241000033114  
7 10599341000033111  
8 10599441000033117  
9 3217241000033119  
10 4806241000033112  
11 4806341000033119  
12 3217141000033114  
13 969841000033115  
14 1052641000033112  
15 8273941000033111  
16 8886841000033113  
17 8887041000033116  
18 8887141000033117  
19 8886941000033117  
20 3270341000033118  
21 2645141000033119  
22 2645241000033114  
23 3270241000033111  
24 1112241000033113  
25 1446641000033117  
26 1152341000033114  
27 10209441000033113  
28 10209641000033110  
29 10209741000033118  
30 10209541000033114  
31 1154241000033113  
32 8840041000033112  
33 8839941000033117  
34 8123841000033116  
35 8123941000033112  
36 8123641000033117  
37 8123541000033118  
38 8124041000033114  
39 8123741000033114  
40 3944041000033114  
41 3943941000033112  
42 3949941000033114  
43 3949841000033118  
44 3949741000033111  
45 3950241000033113  
46 3950041000033117  
47 3950141000033118  
48 11420041000033110  
49 11420141000033114  
50 11419541000033118

For peer review only

1  
2 11419841000033116  
3 2995041000033111  
4 2994941000033111  
5 5886641000033117  
6 1904741000033110  
7 1904841000033117  
8 4326541000033119  
9 1904541000033119  
10 4326341000033114  
11 4326241000033116  
12 5886441000033119  
13 5886741000033114  
14 5886941000033112  
15 1904941000033113  
16 1905141000033112  
17 5886541000033118  
18 4326441000033115  
19 5886841000033116  
20 1905041000033113  
21 1904441000033115  
22 1904641000033118  
23 4803041000033114  
24 4803241000033118  
25 6455241000033110  
26 6455441000033111  
27 6455141000033115  
28 1430541000033115  
29 6455341000033117  
30 3102541000033119  
31 818041000033111  
32 11717441000033116  
33 11717541000033115  
34 11717741000033111  
35 11717641000033119  
36 9158941000033118  
37 1446841000033116  
38 6466841000033110  
39 4608241000033117  
40 4608141000033112  
41 4608441000033116  
42 2280341000033117  
43 9159041000033110  
44 2280241000033110  
45 734641000033116  
46 8614541000033112  
47 4608341000033110  
48 10740541000033118  
49 10740241000033115  
50 10740441000033119  
51 10740341000033113

For peer review only

1  
2 2188541000033112  
3 2188441000033111  
4 9075041000033117  
5 9076141000033113  
6 9074941000033117  
7 9076041000033114  
8 1460341000033118  
9 1455041000033117  
10 2076541000033113  
11 1506241000033118  
12 1454941000033117  
13 7739541000033119  
14 7739741000033110  
15 7739841000033117  
16 7739641000033118  
17 6529941000033113  
18 6530041000033117  
19 11940041000033110  
20 11940241000033119  
21 11939841000033111  
22 11939941000033115  
23 11940141000033114  
24 11940341000033112  
25 1508741000033113  
26 3997441000033118  
27 3982941000033114  
28 3997541000033117  
29 1005441000033112  
30 1519641000033110  
31 504241000033114  
32 1518641000033118  
33 1518541000033119  
34 9104141000033115  
35 3347541000033116  
36 3347441000033117  
37 951841000033112  
38 3347741000033112  
39 9104041000033119  
40 3347641000033115  
41 951741000033119  
42 8560941000033116  
43 8561041000033114  
44 8561041000033114  
45  
46  
47  
48  
49  
50  
51  
52  
53  
54  
55  
56  
57  
58  
59  
60

For peer review only

1  
2 Term  
3 thyroid gland ablat - irradiat  
4 thyroid tumour/metast irradiat  
5 chemotherapy  
6 selective internal radiotherapy of liver using yttrium (90-y) labelled microspheres  
7 sirt (selective internal radiotherapy) of liver using yttrium (90-y) labeled microspheres  
8 sirt (selective internal radiotherapy) of liver using yttrium (90-y) labelled microspheres  
9  
10 superfic.x-ray therapy 10-60kv  
11 radiotherapy procedures  
12 radioth.: temporary implant  
13 radium needles  
14 [v]maintenance chemotherapy  
15 [x]other chemotherapy  
16 admit radiotherapy emergency  
17 afterload radioth.- op cavity  
18 brachytherapy  
19 post-operartive chemotherapy  
20 superficial or orthovoltage treatment for radiotherapy  
21 progress of radiotherapy  
22 radiotherapy progress nos  
23 radiotherapy as the cause of abnormal reaction of patient, or of later complication, without mention of misad  
24 selective internal radiotherapy of liver using yttrium (90-y) labeled microspheres  
25 short dis.+contact radiotherap  
26 short dist/contact radioth nos  
27 pre-operative chemotherapy  
28 post-operartive chemotherapy  
29 high dose brachytherapy  
30 iodine seed radiotherapy  
31 combined pre-operative chemotherapy and radiotherapy  
32 combined post-operative chemotherapy and radiotherapy  
33 selectron therapy  
34 iridium wire therapy  
35 stereotactic radiotherapy  
36 brachytherapy  
37 selective internal radiotherapy microspheres lesion of liver  
38 percutaneous brachytherapy of lesion of bile duct  
39 cancer chemotherapy management plan  
40 procurement drugs for chemotherapy for neoplasm in bands 1-5  
41 procurement drugs chemotherapy neoplasm regimens in band 1  
42 procurement drugs chemotherapy neoplasm regimens in band 2  
43 procurement drugs chemotherapy neoplasm regimens in band 3  
44 procurement drugs chemotherapy neoplasm regimens in band 4  
45 procurement drugs chemotherapy neoplasm regimens in band 5  
46 os procurement drugs chemotherapy for neoplasm in bands 1-5  
47 procurement drugs chemotherapy for neoplasm in bands 1-5 nos  
48 procurement of drugs chemotherapy for neoplasm in bands 6-10  
49 procurement drugs chemotherapy neoplasm regimens in band 6  
50 procurement drugs chemotherapy neoplasm regimens in band 7  
51 procurement drugs chemotherapy neoplasm regimens in band 8  
52 procurement drugs chemotherapy neoplasm regimens in band 9

1 procurement drugs chemotherapy neoplasm regimens in band 10  
2 os procurement drugs chemotherapy for neoplasm in bands 6-10  
3 procurement drugs chemotherapy for neoplasm bands 6-10 nos  
4 del comp chemo neo inc prolong infusion treat first attend  
5 deliv complex parenteral chemotherapy neopl first attendance  
6 deliver simple parenteral chemother neoplas first attendance  
7 delivery subsequent element cycle chemotherapy for neoplasm  
8 vol def radioth imag intensity-modul radia ther (imrt) dosim  
9 volume definition radiotherapy imaging, dosimetry tech supp  
10 volume definit multiple phases complex radiotherapy dosimetr  
11 volume definition simple radiotherapy imaging and dosimetry  
12 volume definit simple radiotherap imaging simple calculation  
13 intro radioactive substance org interstit brachytherapy noc  
14 preparation for total body irradiation  
15 preparation for simp radiotherapy with imaging and dosimetry  
16 prep for simple radioth with imaging and simple calculation  
17 prepar for superficial radiotherapy with simple calculation  
18 intro radioactive substance into organ for brachytherapy noc  
19 intro non-remov radioact subst into organ for brachyther noc  
20 radionuclide therapy  
21 neoadjuvant chemotherapy  
22 radiotherapy - internal  
23 electrochemotherapy  
24 radical radiotherapy  
25 radiation therapy  
26 radio-chem.: into cavity  
27 radio-chem.:for immunosuppres.  
28 radio-chem.:local artery  
29 radio-chemo.: i-v route  
30 radio-chemo.: oral route  
31 radio-chemo.: to stop spread  
32 radio-chemo:local infiltration  
33 radio-chemotherapy nos  
34 radiological post-op. control  
35 radiological pre-op. control  
36 brachytherapy  
37 other chemotherapy drugs  
38 other specified other chemotherapy drugs  
39 unspecified other chemotherapy drugs  
40 radioth. for haemopo. irradiat  
41 radioth. for lymphat.irradiat.  
42 radioth.: infiltrate tissue  
43 radioth.: infuse - head/neck  
44 radioth.: infuse - skull/brain  
45 radioth.: infuse organ cavity  
46 radioth.: permanent seeds nos  
47 radioth.: seeds into brain  
48 radioth.: seeds into cavity  
49 radioth.: temp. abdom. implant  
50 radioth.: temp. brain implant



1  
2 radioth.: temp. limb implant  
3 radioth.: temp. pelvic implant  
4 radioth.: temp. thorax implant  
5 radioth.:infuse-periton cavity  
6 radioth.:infuse-pleural cavity  
7  
8 radioth.:temporary implant nos  
9 radioth.for immunosuppression  
10 radioth:endolymphatic infusion  
11 radioth:infuse-urinary bladder  
12 radioth:seeds into hypophysis  
13 radioth:temp.head/neck implant  
14 radioth:temp.lymphatic implant  
15 radiotherapy - post-op.control  
16 radiotherapy - pre-op. control  
17 radiotherapy -intra-op.control  
18 radiotherapy nec  
19 radiotherapy procedure with complication, without blame  
20  
21 radiotherapy to lesion of conjunctiva  
22 radiotherapy to lesion of cornea  
23 radiotherapy-tumour palliation  
24 preload cavity radioth. nos  
25 preload cavity radioth.-sealed  
26 preload radioth-female genital  
27 preload radioth-urinary system  
28 preload radioth.- ear  
29 preload radioth.- mouth  
30 preload radioth.- nose  
31 preload radioth.- orbit  
32 preload radioth.- rectum  
33 preload radioth.- resp.organs  
34 preload radioth.- upper git  
35 preload radioth.-paranas sinus  
36 neoadjuvant chemotherapy  
37 electrochemotherapy  
38 high dose rate brachytherapy  
39 pulsed dose rate brachytherapy  
40 radiological tumour control  
41 x-ray metastasis control  
42 x-ray radiotherapy control  
43 purpose of radiotherapy  
44 radiotherapy purpose - nos  
45 progress of radiotherapy  
46 radiotherapy started  
47 radiotherapy changed  
48 radiotherapy progress nos  
49 image: field control:radiother  
50 x-ray beam therapy  
51 deep x-ray therapy 150-400 kv  
52 deep x-ray therapy  
53 short distance x-ray therapy  
54  
55  
56  
57  
58  
59  
60

1 intracavitary x-ray therapy  
2 combined x-ray therapy  
3 x-ray beam therapy nos  
4 high-energy beam therapy  
5 betatron photon therapy  
6 high-energy beam therapy nos  
7 fast-electron therapy  
8 betatron electron therapy  
9 positron therapy  
10 combined fast-electron therapy  
11 fast-electron therapy nos  
12 proton therapy  
13 deuteron therapy  
14 distant gamma therapy nos  
15 radium contact therapy  
16 beta source contact therapy  
17 mould technique gamma/beta  
18 combined radiotherapy  
19 combined radiotherapy nos  
20 external radiotherapy nos  
21 polycythaemia irradiation  
22 radioactive drug therapy  
23 combined internal radiotherapy  
24 preload radioth.- op cavity  
25 afterload radioth.- op cavity  
26 radiomimetic chemotherapy  
27 other radiotherapy misc.  
28 give radiosensitising drug  
29 other radiotherapy nos  
30 other nuclear therapy nos  
31 radiotherapy to lesion of peripheral nerve  
32 implantation of radioactive substance into pituitary gland  
33 radiotherapy to lacrimal gland  
34 percutaneous radiofrequency ablation of lesion of kidney  
35 percutaneous radiofrequency ablation of lesion of liver  
36 percutaneous radiofrequency ablation of lesion of lung  
37 endoscopic radiofrequency ablation of lesion of prostate  
38 transurethral radiofrequency needle ablation of prostate  
39 external beam radiotherapy to lesion of retina  
40 radiotherapy  
41 implantation of radioactive substance into vulva  
42 introduction of radioactive substance into uterine cavity  
43 introduction of radioactive substance into peritoneal cavity  
44 introduction of radioactive caesium into organ noc  
45 effect of radiation therapy  
46 admit radiotherapy emergency  
47 radiotherapy treatment groups  
48 radiation aplastic anaemia  
49 aplastic anaemia due to radiation  
50 chemotherapy started

1 teleradiotherapy procedure  
2 eb - external beam radiotherapy  
3 vaginal implantation of radium  
4 radium implant in vagina  
5 poisoning caused by antineoplastic antibiotic  
6 antineoplastic antibiotic poisoning nos  
7 overdose of radiation in therapy  
8 [x]overdose of radiation given during therapy  
9 radiation therapy procedure or service  
10 strontium 89 therapy  
11 radiotherapy to lesion of retina  
12 radiotherapy preparation  
13 radiotherapy volume definition  
14 radiotherapy delivery  
15 radioactive seed implantation noc  
16 radiotherapy procedures nos  
17 other specified radiotherapy procedures  
18 delivery of oral chemotherapy for neoplasm  
19 delivery of chemotherapy for neoplasm  
20 heavy particle therapy  
21 delivery of a fraction of total body irradiation (tbi)  
22 delivery of a fraction of intracavitary radiotherapy  
23 radiotherapy delivery nos  
24 preparation for total body irradiation  
25 preparation for intracavitary radiotherapy  
26 other specified radiotherapy preparation  
27 radiotherapy preparation nos  
28 radiotherapy volume definition nos  
29 other specified radiotherapy volume definition  
30 delivery of a fraction of interstitial radiotherapy  
31 other specified radiotherapy delivery  
32 preparation for interstitial radiotherapy  
33 delivery of oral chemotherapy for neoplasm nos  
34 delivery of exclusively oral chemotherapy for neoplasm  
35 delivery of chemotherapy for neoplasm nos  
36 other specified delivery of chemotherapy for neoplasm  
37 other specified delivery of oral chemotherapy for neoplasm  
38 intravenous chemotherapy  
39 intramuscular chemotherapy  
40 subcutaneous chemotherapy  
41 oral chemotherapy  
42 neutropenia due to irradiation  
43 radiation agranulocytosis  
44 agranulocytosis due to irradiation  
45 seed implantation into prostate  
46 radioth.: temporary implant  
47 radium needles  
48 other nuclear therapy  
49 rt - radiotherapy  
50 teleradiotherapy particulate radiation

1 oral cytotoxic drug therapy  
2 continuous infusion of chemotherapy  
3 ambulatory chemotherapy  
4 [v]radiotherapy session  
5 [v]maintenance chemotherapy  
6 [v]chemotherapy session for neoplasm  
7 [x]other chemotherapy  
8 radiological preoperative control  
9 radiological postoperative control  
10 radiological tumor control  
11 radiotherapy for immunosuppression  
12 radiotherapy for haemopoietic irradiation  
13 radiotherapy for hemopoietic irradiation  
14 radiotherapy for lymphatic irradiation  
15 preoperative course of radiotherapy  
16 radiotherapy - preoperative control  
17 radiotherapy - intraoperative control  
18 postoperative course of radiotherapy  
19 radiotherapy - postoperative control  
20 x-ray therapy - external  
21 xrt - radiotherapy  
22 xrt - teletherapy  
23 x-ray teletherapy  
24 superficial x-ray therapy 10-60 kv  
25 half-deep therapy 60-150 kv  
26 dxt - teletherapy  
27 dxt - deep x-ray therapy  
28 linear accelerator photon therapy  
29 combined heavy particle therapy  
30 gamma ray and intermediate distance curietherapy  
31 intermediate distance curietherapy  
32 combined teletherapy and intermediate distance curietherapy  
33 mold technique gamma/beta  
34 external beam with internal radiotherapy  
35 external beam - surgery with preoperative radiotherapy  
36 external beam - surgery with postoperative radiotherapy  
37 external beam - surgery with chemotherapy  
38 external beam with chemotherapy  
39 internal metabolic radiotherapy  
40 thyroid tumor/metastasis irradiation  
41 bone marrow suppression - irradiation  
42 polycythemia irradiation  
43 bone tumour/metastasis irradiation  
44 bone tumor/metastasis irradiation  
45 internal radiotherapy - unsealed source  
46 radiotherapy: infuse skull/brain  
47 radiotherapy: infuse head/neck  
48 radiotherapy: infuse pleural cavity  
49 radiotherapy: infuse peritoneal cavity  
50 radiotherapy: endolymphatic infusion

1  
2 radiotherapy: infuse urinary bladder  
3 radiotherapy: infuse organ cavity  
4 radiotherapy: infiltrate tissue  
5 internal radiotherapy - permanent seeds  
6 radiotherapy: seeds into hypophysis  
7 radiotherapy: seeds into brain  
8 radiotherapy: seeds into cavity  
9 radiotherapy: temporary brain implant  
10 radiotherapy: temporary head/neck implant  
11 radiotherapy: temporary thorax implant  
12 radiotherapy: temporary abdominal implant  
13 radiotherapy: temporary pelvic implant  
14 radiotherapy: temporary limb implant  
15 radiotherapy: temporary lymphatic implant  
16 preload radiotherapy - orbit  
17 preload radiotherapy - paranasal sinus  
18 preload radiotherapy - nose  
19 preload radiotherapy - mouth  
20 preload radiotherapy - ear  
21 preload radiotherapy - upper gastrointestinal tract  
22 preload radiotherapy - respiratory organs  
23 preload radiotherapy - urinary system  
24 preload radiotherapy - rectum  
25 afterload radiotherapy - head  
26 afterload radiotherapy - upper gastrointestinal tract  
27 afterload radiotherapy - respiratory system  
28 afterload radiotherapy - female genital  
29 afterload radiotherapy - urinary  
30 afterload radiotherapy - rectum  
31 afterload radiotherapy of oropharyngeal cavity  
32 afterload radiotherapy - op cavity  
33 radiochemotherapy: local infiltration  
34 radiochemotherapy: to stop spread  
35 radiochemotherapy: oral route  
36 radiochemotherapy via intravenous route  
37 radiochemotherapy: iv route  
38 radiochemotherapy: for immunosuppression  
39 radiochemotherapy: local artery  
40 radiochemotherapy: into cavity  
41 give radiosensitizing drug  
42 intrathecal injection of chemotherapeutic agent  
43 radiotherapy of conjunctival lesion  
44 radiotherapy of corneal lesion  
45 intraperitoneal administration of radioactive substance  
46 radiotherapy emergency hospital admission  
47 afterload cavity radioth. nos  
48 afterload radioth.- head  
49 afterload radioth.- rectum  
50 afterload radioth.- upper git  
51 afterload radioth.-fem.genital

1 afterload radioth.-resp.system  
2 afterload radioth.-urinary  
3 afterloading cavity radiother.  
4 aplastic anemia due to radiation  
5 radiation aplastic anemia  
6 aplastic anaemia caused by radiation  
7 aplastic anemia caused by radiation  
8 delivery of a fraction of external beam radiotherapy nec  
9 adverse reaction caused by antineoplastic antibiotics  
10 implantation of radioactive substance into vagina  
11 oral delivery of radiotherapy for thyroid ablation  
12 antineoplastic antibiotic poisoning  
13 sr89 therapy  
14 radioactive seed implantation into prostate  
15 cancer chemotherapy  
16 destruction of lesion of retina by radiation therapy  
17 radiotherapy to retina  
18 bile duct brachytherapy  
19 delivery of a fraction of total body irradiation  
20 bone marrow suppres.-irradiat.  
21 bone tumour/metast.irradiat.  
22 neutropenia caused by irradiation  
23 agranulocytosis caused by irradiation  
24 temporary implant radiotherapy  
25 x-ray therapy -external  
26 comb.tele+int.dist.curietherap  
27 combined heavy-particle therap  
28 non-urgent radiotherapy admisn  
29 ct - chemotherapy  
30 intraluminal brachytherapy  
31 intracavitary brachytherapy  
32 plesiotherapy radiation  
33 ict - intracavitary treatment  
34 brachytherapy procedure  
35 sealed source brachytherapy  
36 contact radiation therapy procedure  
37 postoperative chemotherapy  
38 high dose rate brachytherapy  
39 ext.beam + chemotherapy  
40 ext.beam-surg.+post-op.radioth  
41 ext.beam-surgery+chemotherapy  
42 ext.beam-surgery+preop.radioth  
43 extern.beam+intern.radiotherap  
44 external radiotherapy  
45 chemotherapy cycle  
46 radioisotope teleradiotherapy  
47 internal radiotherapy  
48 ri - radioisotope therapy  
49 radioisotope therapy  
50 short distance and contact radiotherapy

1 intracavitary brachytherapy of female genital tract  
2 gynaecologic intracavitary brachytherapy  
3 gynecologic intracavitary brachytherapy  
4 linear-accelerator photon ther  
5 implantation of radioactive substance into prostate  
6 percutaneous radiofrequency ablation of lesion of bone  
7 introduction removable radioactive material to organ noc nos  
8 preparation for external beam radiotherapy  
9 preparation for complex conformal radiotherapy  
10 preparation for hemi body irradiation  
11 preparation for intensity modulated radiation therapy  
12 other specified preparation for external beam radiotherapy  
13 preparation for external beam radiotherapy nos  
14 preparation for brachytherapy  
15 preparation for brachytherapy nos  
16 other specified preparation for brachytherapy  
17 preparation for interstitial brachytherapy  
18 preparation for intracavitary brachytherapy  
19 preparation for intraluminal brachytherapy  
20 megavoltage treatment for adaptive radiotherapy  
21 megavoltage treatment for simple radiotherapy  
22 megavoltage treatment for complex radiotherapy  
23 superficial or orthovoltage treatment for radiotherapy  
24 technical support for preparation for radiotherapy  
25 support for preparation for radiotherapy  
26 support for preparation for radiotherapy nos  
27 other specified support for preparation for radiotherapy  
28 delivery of a fraction of intraluminal brachytherapy  
29 introduction removable radioactive material into organ noc  
30 introduction removable radioactive material to organ noc os  
31 intrathecal chemotherapy  
32 internal metabolic radioth.nos  
33 internal metabolic radiotherap  
34 intern. unsealed radioth. nos  
35 intern.radioth-permanent seeds  
36 intern.radioth-unsealed source  
37 intermed.distance curietherapy  
38 hypoplastic anaemia due to radiation  
39 gamma-ray+int.dist.curietherap  
40 chemotherapy delivery  
41 half deep therapy 60-150 kv  
42 heavy-particle therapy nos  
43 cytotoxic given orally  
44 overdose -radiation in therapy  
45 [rfc] chemotherapy or radiotherapy  
46 Cometriq 20mg capsules and Cometriq 80mg capsules (Ipsen Ltd)  
47 Doxorubicin Hydrochloride Injection 50 mg  
48 Etoposide Injection 20 mg/ml  
49 Mitobronitol Tablets 125 mg  
50 Cytarabine Injection 500 mg vial

1 Thiotepe(With Sodium Chloride And Bicarbonate) Injection 15mg vial  
2 Cyclophosphamide Tablets 10 mg  
3 Docetaxel Solution For Infusion And Diluent 20 mg/2 ml vial  
4 Docetaxel Solution For Infusion And Diluent 80 mg/8 ml vial  
5 Cisplatin Injection 450 mg/vial  
6 Fludarabine Phosphate Injection 50 mg/vial  
7 Ifosfamide Injection 500 mg vial  
8 Cisplatin Injection 150 mg/vial  
9 Cisplatin Injection 500 micrograms/ml  
10 Etoposide Phosphate Injection 100 mg/vial  
11 Cabozantinib 20mg capsules and Cabozantinib 80mg capsules  
12 Cyclophosphamide Injection 1.07 g/vial  
13 Cisplatin Injection 1 mg/ml  
14 Cisplatin Injection 10 mg/vial  
15 Cyclophosphamide Injection 214 mg/vial  
16 Cyclophosphamide Injection 535 mg/vial  
17 Cytarabine Injection 100 mg/ml  
18 Cyclophosphamide Injection 107 mg/vial  
19 Cyclophosphamide Injection  
20 Melphalan Injection 100 mg vial  
21 Doxorubicin Hydrochloride Injection 10 mg  
22 Carmustine Injection 100 mg vial  
23 Oxaliplatin Powder For Solution For Injection 50 mg/vial  
24 Cyclophosphamide 50 Tablets 50 mg  
25 Cisplatin Injection 50 mg/vial  
26 Cytarabine Injection 20 mg/ml  
27 Paclitaxel Powder For Suspension For Infusion 100 mg vial  
28 Oxaliplatin Powder For Solution For Injection 100 mg/vial  
29 Giotrif 40mg tablets (Boehringer Ingelheim Ltd)  
30 Giotrif 20mg tablets (Boehringer Ingelheim Ltd)  
31 Giotrif 50mg tablets (Boehringer Ingelheim Ltd)  
32 Afatinib 30mg tablets  
33 Afatinib 20mg tablets  
34 Afatinib 50mg tablets  
35 Afatinib 40mg tablets  
36 Giotrif 30mg tablets (Boehringer Ingelheim Ltd)  
37 Alectinib 150mg capsules  
38 Alecensa 150mg capsules (Roche Products Ltd)  
39 Amsacrine 75mg/1.5ml solution for infusion ampoules and diluent  
40 Amsidine 75mg/1.5ml solution for infusion ampoules and diluent (Eurocept International bv)  
41 Arsenic 10mg/10ml solution for infusion ampoules  
42 Trisenox 10mg/10ml concentrate for solution for infusion ampoules (Teva UK Ltd)  
43 Asparaginase 10,000unit powder for solution for infusion vials  
44 Spectrila 10,000unit powder for concentrate for solution for infusion vials (medac UK)  
45 Axitinib 1mg tablets  
46 Inlyta 1mg tablets (Pfizer Ltd)  
47 Inlyta 5mg tablets (Pfizer Ltd)  
48 Axitinib 5mg tablets  
49 Azacitidine 100mg powder for suspension for injection vials  
50 Vidaza 100mg powder for suspension for injection vials (Celgene Ltd)



1 Avastin 400mg/16ml solution for infusion vials (Roche Products Ltd)  
2 Bevacizumab 100mg/4ml solution for infusion vials  
3 Bevacizumab 400mg/16ml solution for infusion vials  
4 Avastin 100mg/4ml solution for infusion vials (Roche Products Ltd)  
5 Bexarotene 75mg capsules  
6 Targretin 75mg capsules (Eisai Ltd)  
7 Bortezomib 3.5mg powder for solution for injection vials  
8 Velcade 3.5mg powder for solution for injection vials (Janssen-Cilag Ltd)  
9 Bosutinib 100mg tablets  
10 Bosulif 500mg tablets (Pfizer Ltd)  
11 Bosulif 100mg tablets (Pfizer Ltd)  
12 Bosutinib 500mg tablets  
13 Adcetris 50mg powder for concentrate for solution for infusion vials (Takeda UK Ltd)  
14 Busulfan 60mg/10ml solution for infusion ampoules  
15 Busilvex 60mg/10ml concentrate for solution for infusion ampoules (Pierre Fabre Ltd)  
16 Myleran 2mg tablets (Aspen Pharma Trading Ltd)  
17 Busulfan 2mg tablets  
18 Cometriq 20mg capsules (Ipsen Ltd)  
19 Cabozantinib 40mg tablets  
20 Cabozantinib 20mg capsules  
21 Cabometyx 60mg tablets (Ipsen Ltd)  
22 Cabometyx 20mg tablets (Ipsen Ltd)  
23 Cabozantinib 20mg tablets  
24 Cabometyx 40mg tablets (Ipsen Ltd)  
25 Cabozantinib 60mg tablets  
26 Xeloda 500mg tablets (Roche Products Ltd)  
27 Capecitabine 300mg tablets  
28 Capecitabine 500mg tablets  
29 Capecitabine 150mg tablets  
30 Xeloda 150mg tablets (Roche Products Ltd)  
31 Carboplatin 150mg/15ml solution for infusion vials  
32 Carboplatin 600mg/60ml solution for infusion vials  
33 Carboplatin 50mg/5ml solution for infusion vials  
34 Paraplatin 50mg/5ml solution for infusion vials (Bristol-Myers Squibb Pharmaceuticals Ltd)  
35 Carboplatin 450mg/45ml solution for infusion vials  
36 Carfilzomib 60mg powder for solution for infusion vials  
37 Kyprolis 60mg powder for solution for infusion vials (Amgen Ltd)  
38 Carmustine 100mg powder and solvent for solution for injection vials  
39 Carmustine 7.7mg implant  
40 Gliadel 7.7mg implant (Eisai Ltd)  
41 BiCNU 100mg powder and solvent for solution for infusion vials (Bristol-Myers Squibb Pharmaceuticals Ltd)  
42 Catumaxomab 10micrograms/0.1ml solution for infusion pre-filled syringes  
43 Catumaxomab 50micrograms/0.5ml solution for infusion pre-filled syringes  
44 Zykadia 150mg capsules (Novartis Pharmaceuticals UK Ltd)  
45 Ceritinib 150mg capsules  
46 Erbitux 100mg/50ml solution for infusion vials (Merck Serono Ltd)  
47 Cetuximab 100mg/50ml solution for infusion vials  
48 Leukeran 2mg tablets (Aspen Pharma Trading Ltd)  
49 Leukeran 5mg tablets (GlaxoSmithKline UK Ltd)  
50 Chlorambucil 2mg tablets

1 Chlorambucil 5mg tablets  
2 Chloromethine 10mg solution for injection vials  
3 Cisplatin 50mg powder for solution for infusion vials  
4 Cisplatin 100mg/100ml solution for infusion vials  
5 Cisplatin 10mg/10ml solution for infusion vials  
6 Cisplatin 50mg/50ml solution for infusion vials  
7 Cladribine 10mg tablets  
8 Cladribine 10mg/10ml solution for infusion vials  
9 Leustat 10mg/10ml solution for infusion vials (Janssen-Cilag Ltd)  
10 Litak 10mg/5ml solution for injection vials (Lipomed GmbH)  
11 Cladribine 10mg/5ml solution for injection vials  
12 Mavenclad 10mg tablets (Merck Serono Ltd)  
13 Evoltra 20mg/20ml concentrate for solution for infusion vials (Sanofi)  
14 Clofarabine 20mg/20ml solution for infusion vials  
15 Cotellic 20mg tablets (Roche Products Ltd)  
16 Cobimetinib 20mg tablets  
17 Crisantaspase 10,000unit powder for solution for injection vials  
18 Erwinase 10,000unit powder for solution for injection vials (EUSA Pharma Ltd)  
19 Xalkori 200mg capsules (Pfizer Ltd)  
20 Crizotinib 200mg capsules  
21 Crizotinib 250mg capsules  
22 Xalkori 250mg capsules (Pfizer Ltd)  
23 Endoxana 50mg tablets (Baxter Healthcare Ltd)  
24 Cyclophosphamide 50mg tablets  
25 Cyclophosphamide 2g powder for solution for injection vials  
26 Endoxana 500mg powder for solution for injection vials (Baxter Healthcare Ltd)  
27 Endoxana 1g powder for solution for injection vials (Baxter Healthcare Ltd)  
28 Cyclophosphamide 200mg powder for solution for injection vials  
29 Cyclophosphamide 500mg powder for solution for injection vials  
30 Cyclophosphamide 1g powder for solution for injection vials  
31 Cytarabine 2g/20ml solution for injection vials  
32 DepoCyte 50mg/5ml suspension for injection vials (Napp Pharmaceuticals Ltd)  
33 Cytarabine 500mg/5ml solution for injection vials  
34 Cytarabine 5g/50ml solution for infusion vials  
35 Cytarabine (liposomal) 50mg/5ml suspension for injection vials  
36 Cytarabine 4g/40ml solution for injection vials  
37 Cytarabine 1g/10ml solution for injection vials  
38 Cytarabine 100mg/1ml solution for injection vials  
39 Cytarabine 100mg/5ml solution for injection vials  
40 Cytarabine 500mg/25ml solution for injection vials  
41 Tafinlar 50mg capsules (Novartis Pharmaceuticals UK Ltd)  
42 Dabrafenib 75mg capsules  
43 Tafinlar 75mg capsules (Novartis Pharmaceuticals UK Ltd)  
44 Dabrafenib 50mg capsules  
45 Dacarbazine 1g powder for solution for infusion vials  
46 DTIC-Dome 200mg powder for solution for injection vials (Bayer Plc)  
47 Dacarbazine 500mg powder for solution for infusion vials  
48 Dacarbazine 100mg powder for solution for injection vials  
49 Dacarbazine 200mg powder for solution for injection vials  
50 Dacarbazine 600mg powder for solution for infusion vials

1 Dactinomycin 500microgram powder for solution for injection vials  
2 Cosmegen Lyovac 500microgram powder for solution for injection vials (Orphan Europe (UK) Ltd)  
3 Daratumumab 100mg/5ml solution for infusion vials  
4 Darzalex 400mg/20ml concentrate for solution for infusion vials (Janssen-Cilag Ltd)  
5 Daratumumab 400mg/20ml solution for infusion vials  
6 Darzalex 100mg/5ml concentrate for solution for infusion vials (Janssen-Cilag Ltd)  
7 Dasatinib 20mg tablets  
8 Dasatinib 50mg tablets  
9 Sprycel 20mg tablets (Bristol-Myers Squibb Pharmaceuticals Ltd)  
10 Sprycel 50mg tablets (Bristol-Myers Squibb Pharmaceuticals Ltd)  
11 Dasatinib 70mg tablets  
12 Sprycel 70mg tablets (Bristol-Myers Squibb Pharmaceuticals Ltd)  
13 Daunorubicin 20mg powder for solution for infusion vials  
14 DaunoXome 50mg emulsion for infusion vials (Galen Ltd)  
15 Daunorubicin (liposomal) 50mg emulsion for infusion vials  
16 Dacogen 50mg powder for concentrate for solution for infusion vials (Janssen-Cilag Ltd)  
17 Decitabine 50mg powder for solution for infusion vials  
18 Dexrazoxane 500mg powder and solvent for solution for infusion vials  
19 Dexrazoxane 500mg powder for solution for infusion vials  
20 Cardioxane 500mg powder for solution for infusion vials (Clinigen Healthcare Ltd)  
21 Savene 500mg powder for concentrate and solvent for solution for infusion vials (Clinigen Healthcare Ltd)  
22 Docetaxel 20mg/0.72ml solution for infusion vials and diluent  
23 Docetaxel 20mg/0.5ml solution for infusion vials and diluent  
24 Docetaxel 80mg/2ml solution for infusion vials and diluent  
25 Taxceus 80mg/4ml concentrate for solution for infusion vials (medac UK)  
26 Taxotere 20mg/0.5ml solution for infusion vials and diluent (Sanofi)  
27 Docetaxel 160mg/16ml solution for infusion vials  
28 Docetaxel 80mg/2.88ml solution for infusion vials and diluent  
29 Docetaxel 140mg/7ml solution for infusion vials  
30 Docetaxel 20mg/2ml solution for infusion vials  
31 Docetaxel 20mg/1ml solution for infusion vials  
32 Taxotere 80mg/4ml concentrate for solution for infusion vials (Sanofi)  
33 Docetaxel 160mg/8ml solution for infusion vials  
34 Taxceus 140mg/7ml concentrate for solution for infusion vials (medac UK)  
35 Taxotere 80mg/2ml solution for infusion vials and diluent (Sanofi)  
36 Taxotere 160mg/8ml concentrate for solution for infusion vials (Sanofi)  
37 Taxceus 20mg/1ml concentrate for solution for infusion vials (medac UK)  
38 Docetaxel 80mg/8ml solution for infusion vials  
39 Docetaxel 80mg/4ml solution for infusion vials  
40 Taxotere 20mg/1ml concentrate for solution for infusion vials (Sanofi)  
41 Doxorubicin 200mg/100ml solution for infusion vials  
42 Doxorubicin (liposomal) 50mg powder and solvent for suspension for infusion vials  
43 Doxorubicin 50mg/25ml solution for injection Cytosafe vials (Pfizer Ltd)  
44 Doxorubicin 10mg powder for solution for injection vials  
45 Doxorubicin 10mg/5ml solution for injection vials  
46 Doxorubicin 10mg/5ml solution for injection Cytosafe vials (Pfizer Ltd)  
47 Doxorubicin Rapid Dissolution 50mg powder for solution for injection vials (Pfizer Ltd)  
48 Doxorubicin 200mg/100ml solution for injection Cytosafe vials (Pfizer Ltd)  
49 Doxorubicin 50mg/25ml solution for injection vials  
50 Myocet 50mg powder and solvent for suspension for infusion vials (Teva UK Ltd)

1 Doxorubicin Rapid Dissolution 10mg powder for solution for injection vials (Pfizer Ltd)  
2 Doxorubin 50mg powder for solution for injection vials (medac UK)  
3 Doxorubicin 50mg powder for solution for injection vials  
4 Caelyx 20mg/10ml concentrate for solution for infusion vials (Janssen-Cilag Ltd)  
5 Caelyx 50mg/25ml concentrate for solution for infusion vials (Janssen-Cilag Ltd)  
6 Doxorubicin liposomal pegylated 50mg/25ml solution for infusion vials  
7 Doxorubicin liposomal pegylated 20mg/10ml solution for infusion vials  
8 Empliciti 400mg powder for concentrate for solution for infusion vials (Bristol-Myers Squibb Pharmaceuticals L  
9 Empliciti 300mg powder for concentrate for solution for infusion vials (Bristol-Myers Squibb Pharmaceuticals L  
10 Elotuzumab 400mg powder for solution for infusion vials  
11 Elotuzumab 300mg powder for solution for infusion vials  
12 Pharmorubicin 200mg/100ml solution for infusion Cytosafe vials (Pfizer Ltd)  
13 Epirubicin 100mg/50ml solution for infusion vials  
14 Pharmorubicin Rapid Dissolution 10mg powder for solution for injection vials (Pfizer Ltd)  
15 Epirubicin 200mg/100ml solution for infusion vials  
16 Epirubicin 50mg/25ml solution for injection vials  
17 Epirubicin 10mg/5ml solution for injection vials  
18 Epirubicin 20mg powder for solution for injection vials  
19 Epirubicin 10mg powder for solution for injection vials  
20 Pharmorubicin Rapid Dissolution 20mg powder for solution for injection vials (Pfizer Ltd)  
21 Pharmorubicin 50mg/25ml solution for injection Cytosafe vials (Pfizer Ltd)  
22 Pharmorubicin Rapid Dissolution 50mg powder for solution for injection vials (Pfizer Ltd)  
23 Pharmorubicin 10mg/5ml solution for injection Cytosafe vials (Pfizer Ltd)  
24 Epirubicin 50mg powder for solution for injection vials  
25 Eribulin 880micrograms/2ml solution for injection vials  
26 Halaven 0.88mg/2ml solution for injection vials (Eisai Ltd)  
27 Erlotinib 100mg tablets  
28 Erlotinib 150mg tablets  
29 Tarceva 150mg tablets (Roche Products Ltd)  
30 Tarceva 100mg tablets (Roche Products Ltd)  
31 Estracyt 140mg capsules (Pfizer Ltd)  
32 Estramustine 140mg capsules  
33 Eposin 100mg/5ml concentrate for solution for infusion vials (medac UK)  
34 Etoposide 100mg capsules  
35 Eposin 500mg/25ml concentrate for solution for infusion vials (medac UK)  
36 Etoposide 100mg/5ml solution for infusion vials  
37 Vepesid 50mg capsules (Bristol-Myers Squibb Pharmaceuticals Ltd)  
38 Vepesid 100mg capsules (Bristol-Myers Squibb Pharmaceuticals Ltd)  
39 Etoposide 500mg/25ml solution for infusion vials  
40 Etoposide 50mg capsules  
41 Vepesid 100mg/5ml solution for infusion vials (Bristol-Myers Squibb Pharmaceuticals Ltd)  
42 Etoposide 100mg powder for solution for injection vials  
43 Etopophos 100mg powder for solution for injection vials (Bristol-Myers Squibb Pharmaceuticals Ltd)  
44 Everolimus 3mg dispersible tablets sugar free  
45 Everolimus 2.5mg tablets  
46 Votubia 3mg dispersible tablets (Novartis Pharmaceuticals UK Ltd)  
47 Everolimus 2mg dispersible tablets sugar free  
48 Afinitor 10mg tablets (Novartis Pharmaceuticals UK Ltd)  
49 Votubia 5mg dispersible tablets (Novartis Pharmaceuticals UK Ltd)  
50 Certican 0.5mg tablets (Novartis Pharmaceuticals UK Ltd)

1 Everolimus 250microgram tablets  
2  
3 Votubia 2mg dispersible tablets (Novartis Pharmaceuticals UK Ltd)  
4 Certican 0.75mg tablets (Novartis Pharmaceuticals UK Ltd)  
5 Afinitor 5mg tablets (Novartis Pharmaceuticals UK Ltd)  
6 Votubia 5mg tablets (Novartis Pharmaceuticals UK Ltd)  
7  
8 Everolimus 500microgram tablets  
9 Everolimus 5mg tablets  
10 Certican 0.25mg tablets (Novartis Pharmaceuticals UK Ltd)  
11 Everolimus 5mg dispersible tablets sugar free  
12 Afinitor 2.5mg tablets (Novartis Pharmaceuticals UK Ltd)  
13 Everolimus 10mg tablets  
14 Votubia 10mg tablets (Novartis Pharmaceuticals UK Ltd)  
15 Votubia 2.5mg tablets (Novartis Pharmaceuticals UK Ltd)  
16 Everolimus 750microgram tablets  
17 Fludarabine phosphate 50mg/2ml solution for injection vials  
18 Fludarabine phosphate 50mg powder for solution for injection vials  
19 Fludarabine phosphate 10mg tablets  
20 Fludara 10mg tablets (Sanofi)  
21 Fludara 50mg powder for solution for injection vials (Sanofi)  
22 Fluorouracil 250mg capsules  
23 Fluorouracil 2.5g/50ml solution for infusion vials  
24 Fluorouracil 2.5g/100ml solution for infusion vials  
25 Fluorouracil 5g/100ml solution for infusion vials  
26 Fluorouracil 1g/20ml solution for injection vials  
27 Fluorouracil 500mg/10ml solution for injection vials  
28 Fluorouracil 250mg/10ml solution for injection vials  
29 Fluorouracil 500mg/20ml solution for injection vials  
30 Iressa 250mg tablets (AstraZeneca UK Ltd)  
31 Gefitinib 250mg tablets  
32 Gemcitabine 1.2g/120ml infusion bags  
33 Gemzar 200mg powder for solution for infusion vials (Eli Lilly and Company Ltd)  
34 Gemcitabine 2g powder for solution for infusion vials  
35 Gemcitabine 200mg/5ml solution for infusion vials  
36 Gemcitabine 200mg powder for solution for infusion vials  
37 Gemcitabine 1.8g/180ml infusion bags  
38 Gemcitabine 1.6g/160ml infusion bags  
39 Gemcitabine 2g/50ml solution for infusion vials  
40 Gemcitabine 1.5g powder for solution for infusion vials  
41 Gemcitabine 1g powder for solution for infusion vials  
42 Gemcitabine 2.2g/220ml infusion bags  
43 Gemzar 1g powder for solution for infusion vials (Eli Lilly and Company Ltd)  
44 Gemcitabine 1g/25ml solution for infusion vials  
45 Gemcitabine 2g/200ml infusion bags  
46 Teysuno 15mg/4.35mg/11.8mg capsules (Nordic Pharma Ltd)  
47 Teysuno 20mg/5.8mg/15.8mg capsules (Nordic Pharma Ltd)  
48 Hydroxycarbamide 500mg capsules  
49 Hydrea 500mg capsules (Bristol-Myers Squibb Pharmaceuticals Ltd)  
50 Imbruvica 140mg capsules (Janssen-Cilag Ltd)  
51 Ibrutinib 140mg capsules  
52 Idarubicin 5mg powder for solution for injection vials

1  
2 Idarubicin 10mg powder for solution for injection vials  
3 Zavedos 10mg powder for solution for injection vials (Pfizer Ltd)  
4 Zavedos 10mg capsules (Pfizer Ltd)  
5 Zavedos 5mg capsules (Pfizer Ltd)  
6 Idarubicin 5mg capsules  
7 Zavedos 25mg capsules (Pfizer Ltd)  
8 Idarubicin 25mg capsules  
9 Zavedos 5mg powder for solution for injection vials (Pfizer Ltd)  
10 Idarubicin 10mg capsules  
11 Zydelig 150mg tablets (Gilead Sciences International Ltd)  
12 Mitoxana 2g powder for solution for injection vials (Baxter Healthcare Ltd)  
13 Ifosfamide 1g powder for solution for injection vials  
14 Mitoxana 1g powder for solution for injection vials (Baxter Healthcare Ltd)  
15 Ifosfamide 2g powder for solution for injection vials  
16 Glivec 400mg tablets (Novartis Pharmaceuticals UK Ltd)  
17 Imatinib 400mg tablets  
18 Imatinib 100mg tablets  
19 Glivec 100mg tablets (Novartis Pharmaceuticals UK Ltd)  
20 Yervoy 200mg/40ml concentrate for solution for infusion vials (Bristol-Myers Squibb Pharmaceuticals Ltd)  
21 Yervoy 50mg/10ml concentrate for solution for infusion vials (Bristol-Myers Squibb Pharmaceuticals Ltd)  
22 Irinotecan 500mg/25ml solution for infusion vials  
23 Irinotecan 50mg/10ml solution for infusion vials  
24 Campto 100mg/5ml concentrate for solution for infusion vials (Pfizer Ltd)  
25 Irinotecan 300mg/15ml solution for infusion vials  
26 Irinotecan 40mg/2ml solution for infusion vials  
27 Onivyde 50mg/10ml concentrate for solution for infusion vials (Baxalta UK Ltd)  
28 Campto 300mg/15ml concentrate for solution for infusion vials (Pfizer Ltd)  
29 Irinotecan 100mg/5ml solution for infusion vials  
30 Campto 40mg/2ml concentrate for solution for infusion vials (Pfizer Ltd)  
31 Ninlaro 4mg capsules (Takeda UK Ltd)  
32 Ixazomib 3mg capsules  
33 Ixazomib 4mg capsules  
34 Ninlaro 3mg capsules (Takeda UK Ltd)  
35 Ninlaro 2.3mg capsules (Takeda UK Ltd)  
36 Ixazomib 2.3mg capsules  
37 Lapatinib 250mg tablets  
38 Tyverb 250mg tablets (Novartis Pharmaceuticals UK Ltd)  
39 Revlimid 25mg capsules (Celgene Ltd)  
40 Lenalidomide 25mg capsules  
41 Revlimid 2.5mg capsules (Celgene Ltd)  
42 Revlimid 20mg capsules (Celgene Ltd)  
43 Lenalidomide 5mg capsules  
44 Revlimid 15mg capsules (Celgene Ltd)  
45 Lenalidomide 2.5mg capsules  
46 Lenalidomide 7.5mg capsules  
47 Lenalidomide 10mg capsules  
48 Lenalidomide 20mg capsules  
49 Lenalidomide 15mg capsules  
50 Revlimid 10mg capsules (Celgene Ltd)  
51 Revlimid 5mg capsules (Celgene Ltd)



1  
2 Revlimid 7.5mg capsules (Celgene Ltd)  
3 Lenvatinib 4mg capsules  
4 Kisplyx 10mg capsules (Eisai Ltd)  
5 Kisplyx 4mg capsules (Eisai Ltd)  
6 Lenvima 4mg capsules (Eisai Ltd)  
7 Lenvima 10mg capsules (Eisai Ltd)  
8 Lenvatinib 10mg capsules  
9 Lomustine 10mg capsules  
10 Lomustine 40mg capsules  
11 Melphalan 5mg tablets  
12 Alkeran 2mg tablets (Aspen Pharma Trading Ltd)  
13 Alkeran 5mg tablets (GlaxoSmithKline UK Ltd)  
14 Melphalan 2mg tablets  
15 Melphalan 50mg powder and solvent for solution for injection vials  
16 Alkeran 50mg powder and solvent for solution for injection vials (Aspen Pharma Trading Ltd)  
17 Mesna 400mg tablets  
18 Mesna 600mg tablets  
19 Uromitexan 600mg tablets (Baxter Healthcare Ltd)  
20 Mesna 400mg/4ml solution for injection ampoules  
21 Mesna 1g/10ml solution for injection ampoules  
22 Uromitexan 400mg tablets (Baxter Healthcare Ltd)  
23 Uromitexan 400mg/4ml solution for injection ampoules (Baxter Healthcare Ltd)  
24 Mitomycin-C Kyowa 10mg powder for solution for injection vials (Kyowa Kirin Ltd)  
25 Mitomycin-C Kyowa 2mg powder for solution for injection vials (Kyowa Kirin Ltd)  
26 Mitomycin-C Kyowa 20mg powder for solution for injection vials (Kyowa Kirin Ltd)  
27 Mitomycin 10mg powder for solution for injection vials  
28 Mitomycin-C Kyowa 40mg powder for solution for injection vials (Kyowa Kirin Ltd)  
29 Mitomycin 20mg powder for solution for injection vials  
30 Mitomycin 2mg powder for solution for injection vials  
31 Mitomycin 40mg powder for solution for injection vials  
32 Lysodren 500mg tablets (HRA Pharma UK Ltd)  
33 Mitotane 500mg tablets  
34 Onkotrone 25mg/12.5ml solution for infusion vials (Baxter Healthcare Ltd)  
35 Mitoxantrone 25mg/12.5ml solution for infusion vials  
36 Mitoxantrone 30mg/15ml solution for infusion vials  
37 Onkotrone 30mg/15ml solution for infusion vials (ASTA Medica Ltd)  
38 Mitoxantrone 20mg/10ml solution for infusion vials  
39 Onkotrone 20mg/10ml solution for infusion vials (Baxter Healthcare Ltd)  
40 Portrazza 800mg/50ml concentrate for solution for infusion vials (Eli Lilly and Company Ltd)  
41 Necitumumab 800mg/50ml solution for infusion vials  
42 Nelarabine 250mg/50ml solution for infusion vials  
43 Atriance 250mg/50ml solution for infusion vials (Novartis Pharmaceuticals UK Ltd)  
44 Nilotinib 200mg capsules  
45 Tasigna 200mg capsules (Novartis Pharmaceuticals UK Ltd)  
46 Vargatef 100mg capsules (Boehringer Ingelheim Ltd)  
47 Vargatef 150mg capsules (Boehringer Ingelheim Ltd)  
48 Nintedanib 100mg capsules  
49 Nintedanib 150mg capsules  
50 Opdivo 40mg/4ml concentrate for solution for infusion vials (Bristol-Myers Squibb Pharmaceuticals Ltd)  
51 Nivolumab 40mg/4ml solution for infusion vials

1 Opdivo 100mg/10ml concentrate for solution for infusion vials (Bristol-Myers Squibb Pharmaceuticals Ltd)  
2 Nivolumab 100mg/10ml solution for infusion vials  
3 Lynparza 50mg capsules (AstraZeneca UK Ltd)  
4 Olaparib 50mg capsules  
5 Lartruvo 190mg/19ml concentrate for solution for infusion vials (Eli Lilly and Company Ltd)  
6 Olaratumab 190mg/19ml solution for infusion vials  
7 Lartruvo 500mg/50ml concentrate for solution for infusion vials (Eli Lilly and Company Ltd)  
8 Olaratumab 500mg/50ml solution for infusion vials  
9 Tagrisso 80mg tablets (AstraZeneca UK Ltd)  
10 Osimertinib 80mg tablets  
11 Osimertinib 40mg tablets  
12 Tagrisso 40mg tablets (AstraZeneca UK Ltd)  
13 Eloxatin 200mg/40ml concentrate for solution for infusion vials (Sanofi)  
14 Eloxatin 50mg powder for solution for infusion vials (Sanofi)  
15 Oxaliplatin 100mg/20ml solution for infusion vials  
16 Oxaliplatin 50mg powder for solution for infusion vials  
17 Oxaliplatin 50mg/10ml solution for infusion vials  
18 Eloxatin 50mg/10ml concentrate for solution for infusion vials (Sanofi)  
19 Oxaliplatin 100mg powder for solution for infusion vials  
20 Oxaliplatin 150mg powder for solution for infusion vials  
21 Eloxatin 100mg powder for solution for infusion vials (Sanofi)  
22 Oxaliplatin 200mg/40ml solution for infusion vials  
23 Eloxatin 100mg/20ml concentrate for solution for infusion vials (Sanofi)  
24 Taxol 100mg/16.7ml solution for infusion vials (Bristol-Myers Squibb Pharmaceuticals Ltd)  
25 Paclitaxel 30mg/5ml solution for infusion vials  
26 Paclitaxel 300mg/50ml solution for infusion vials  
27 Taxol 30mg/5ml solution for infusion vials (Bristol-Myers Squibb Pharmaceuticals Ltd)  
28 Paclitaxel 150mg/25ml solution for infusion vials  
29 Taxol 150mg/25ml solution for infusion vials (Bristol-Myers Squibb Pharmaceuticals Ltd)  
30 Paclitaxel 100mg/16.7ml solution for infusion vials  
31 Paclitaxel albumin 100mg powder for suspension for infusion vials  
32 Abraxane 100mg powder for suspension for infusion vials (Celgene Ltd)  
33 Palbociclib 125mg capsules  
34 Ibrance 75mg capsules (Pfizer Ltd)  
35 Ibrance 100mg capsules (Pfizer Ltd)  
36 Palbociclib 75mg capsules  
37 Ibrance 125mg capsules (Pfizer Ltd)  
38 Palbociclib 100mg capsules  
39 Palifermin 6.25mg powder for solution for injection vials  
40 Kepivance 6.25mg powder for solution for injection vials (Swedish Orphan Biovitrum Ltd)  
41 Vectibix 100mg/5ml concentrate for solution for infusion vials (Amgen Ltd)  
42 Panitumumab 100mg/5ml solution for infusion vials  
43 Panitumumab 400mg/20ml solution for infusion vials  
44 Vectibix 400mg/20ml concentrate for solution for infusion vials (Amgen Ltd)  
45 Farydak 10mg capsules (Novartis Pharmaceuticals UK Ltd)  
46 Farydak 20mg capsules (Novartis Pharmaceuticals UK Ltd)  
47 Panobinostat 20mg capsules  
48 Farydak 15mg capsules (Novartis Pharmaceuticals UK Ltd)  
49 Panobinostat 10mg capsules  
50 Panobinostat 15mg capsules  
51



1  
2     Votrient 400mg tablets (Novartis Pharmaceuticals UK Ltd)  
3     Pazopanib 400mg tablets  
4     Pazopanib 200mg tablets  
5     Votrient 200mg tablets (Novartis Pharmaceuticals UK Ltd)  
6     Pegaspargase 3,750units/5ml solution for injection vials  
7  
8     Oncaspar 3,750units/5ml solution for injection vials (Imported (United States))  
9     Pembrolizumab 50mg powder for solution for infusion vials  
10    Keytruda 50mg powder for concentrate for solution for infusion vials (Merck Sharp & Dohme Ltd)  
11    Alimta 500mg powder for concentrate for solution for infusion vials (Eli Lilly and Company Ltd)  
12    Pemetrexed 100mg powder for solution for infusion vials  
13    Alimta 100mg powder for concentrate for solution for infusion vials (Eli Lilly and Company Ltd)  
14    Pemetrexed 500mg powder for solution for infusion vials  
15    Nipent 10mg powder for solution for injection vials (Hospira UK Ltd)  
16    Pentostatin 10mg powder for solution for injection vials  
17    Perjeta 420mg/14ml concentrate for solution for infusion vials (Roche Products Ltd)  
18    Ponatinib 15mg tablets  
19    Iclusig 15mg tablets (Incyte Biosciences UK Ltd)  
20    Iclusig 45mg tablets (Incyte Biosciences UK Ltd)  
21    Ponatinib 45mg tablets  
22    Porfimer sodium 75mg powder for solution for injection vials  
23    Photofrin 15mg powder for solution for injection vials (Axcen Pharma Inc)  
24    Photofrin 75mg powder for solution for injection vials (Pinnacle Biologics BV)  
25    Porfimer sodium 15mg powder for solution for injection vials  
26    Procarbazine 50mg capsules  
27    Tomudex 2mg powder for solution for infusion vials (Hospira UK Ltd)  
28    Raltitrexed 2mg powder for solution for infusion vials  
29    Ramucirumab 100mg/10ml solution for infusion vials  
30    Cyramza 100mg/10ml concentrate for solution for infusion vials (Eli Lilly and Company Ltd)  
31    Cyramza 500mg/50ml concentrate for solution for infusion vials (Eli Lilly and Company Ltd)  
32    Ramucirumab 500mg/50ml solution for infusion vials  
33    Razoxane 125mg tablets  
34    Stivarga 40mg tablets (Bayer Plc)  
35    Regorafenib 40mg tablets  
36    Jakavi 5mg tablets (Novartis Pharmaceuticals UK Ltd)  
37    Jakavi 15mg tablets (Novartis Pharmaceuticals UK Ltd)  
38    Ruxolitinib 15mg tablets  
39    Ruxolitinib 5mg tablets  
40    Jakavi 20mg tablets (Novartis Pharmaceuticals UK Ltd)  
41    Ruxolitinib 20mg tablets  
42    Nexavar 200mg tablets (Bayer Plc)  
43    Sorafenib 200mg tablets  
44    Sunitinib 50mg capsules  
45    Sunitinib 25mg capsules  
46    Sunitinib 12.5mg capsules  
47    Sutent 50mg capsules (Pfizer Ltd)  
48    Sutent 12.5mg capsules (Pfizer Ltd)  
49    Sutent 25mg capsules (Pfizer Ltd)  
50    Imlygic 1million plaque forming units/1ml solution for injection vials (Amgen Ltd)  
51    Imlygic 100million plaque forming units/1ml solution for injection vials (Amgen Ltd)  
52    Talimogene laherparepvec 1million plaque forming units/1ml solution for injection vials

1 Talimogene laherparepvec 100million plaque forming units/1ml solution for injection vials  
2 Foscan 20mg/5ml solution for injection vials (Biolitec Pharma Ltd)  
3 Temoporfin 20mg/5ml solution for injection vials  
4 Temomedac 100mg capsules (medac UK)  
5 Temozolomide 250mg capsules  
6 Temodal 5mg capsules (Merck Sharp & Dohme Ltd)  
7 Temodal 180mg capsules (Merck Sharp & Dohme Ltd)  
8 Temozolomide 20mg capsules  
9 Temozolomide 180mg capsules  
10 Temozolomide 140mg capsules  
11 Temomedac 5mg capsules (medac UK)  
12 Temomedac 140mg capsules (medac UK)  
13 Temomedac 250mg capsules (medac UK)  
14 Temodal 20mg capsules (Merck Sharp & Dohme Ltd)  
15 Temodal 250mg capsules (Merck Sharp & Dohme Ltd)  
16 Temomedac 20mg capsules (medac UK)  
17 Temodal 140mg capsules (Merck Sharp & Dohme Ltd)  
18 Temomedac 180mg capsules (medac UK)  
19 Temodal 100mg capsules (Merck Sharp & Dohme Ltd)  
20 Temozolomide 5mg capsules  
21 Temozolomide 100mg capsules  
22 Temsirolimus 30mg/1.2ml solution for infusion vials and diluent  
23 Torisel 30mg/1.2ml concentrate for solution for infusion vials and diluent (Pfizer Ltd)  
24 Thiotepa 15mg powder for solution for infusion vials  
25 Tepadina 15mg powder for concentrate for solution for infusion vials (Adienne Pharma & Biotech)  
26 Thiotepa 100mg powder for solution for infusion vials  
27 Thiotepa 15mg powder for solution for injection vials  
28 Tepadina 100mg powder for concentrate for solution for infusion vials (Adienne Pharma & Biotech)  
29 Tioguanine 40mg tablets  
30 Lanvis 40mg tablets (Aspen Pharma Trading Ltd)  
31 Trifluridine 15mg / Tipiracil 6.14mg tablets  
32 Trifluridine 20mg / Tipiracil 8.19mg tablets  
33 Lonsurf 20mg/8.19mg tablets (Servier Laboratories Ltd)  
34 Lonsurf 15mg/6.14mg tablets (Servier Laboratories Ltd)  
35 Potactasol 1mg powder for concentrate for solution for infusion vials (Actavis UK Ltd)  
36 Topotecan 4mg powder for solution for infusion vials  
37 Topotecan 4mg/4ml solution for infusion vials  
38 Topotecan 1mg capsules  
39 Topotecan 250microgram capsules  
40 Hycamtin 1mg capsules (Novartis Pharmaceuticals UK Ltd)  
41 Hycamtin 1mg powder for concentrate for solution for infusion vials (Novartis Pharmaceuticals UK Ltd)  
42 Potactasol 4mg powder for concentrate for solution for infusion vials (Actavis UK Ltd)  
43 Topotecan 1mg powder for solution for infusion vials  
44 Hycamtin 4mg powder for concentrate for solution for infusion vials (Novartis Pharmaceuticals UK Ltd)  
45 Topotecan 1mg/1ml solution for infusion vials  
46 Hycamtin 0.25mg capsules (Novartis Pharmaceuticals UK Ltd)  
47 Mekinist 2mg tablets (Novartis Pharmaceuticals UK Ltd)  
48 Trametinib 500micrograms tablets  
49 Mekinist 0.5mg tablets (Novartis Pharmaceuticals UK Ltd)  
50 Trametinib 2mg tablets

1 Herceptin 150mg powder for solution for infusion vials (Roche Products Ltd)  
2 Trastuzumab 150mg powder for solution for infusion vials  
3 Trastuzumab emtansine 160mg powder for solution for infusion vials  
4 Kadcylla 160mg powder for concentrate for solution for infusion vials (Roche Products Ltd)  
5 Trastuzumab emtansine 100mg powder for solution for infusion vials  
6 Kadcylla 100mg powder for concentrate for solution for infusion vials (Roche Products Ltd)  
7 Treosulfan 5g powder for solution for injection vials  
8 Treosulfan 250mg capsules  
9 Treosulfan 1g powder for solution for injection vials  
10 Vesanoïd 10mg capsules (Intrapharm Laboratories Ltd)  
11 Tretinoin 10mg capsules  
12 Vandetanib 100mg tablets  
13 Caprelsa 300mg tablets (Genzyme Therapeutics Ltd)  
14 Caprelsa 100mg tablets (Genzyme Therapeutics Ltd)  
15 Vandetanib 300mg tablets  
16 Vemurafenib 240mg tablets  
17 Zelboraf 240mg tablets (Roche Products Ltd)  
18 Venetoclax 100mg tablets  
19 Venclyxto 50mg tablets (AbbVie Ltd)  
20 Venetoclax 10mg tablets  
21 Venetoclax 50mg tablets  
22 Venclyxto 10mg tablets (AbbVie Ltd)  
23 Venclyxto 100mg tablets (AbbVie Ltd)  
24 Velbe 10mg powder for solution for injection vials (Eli Lilly and Company Ltd)  
25 Vincristine 5mg/5ml solution for injection vials  
26 Vincristine 1mg/1ml solution for injection vials  
27 Vincristine 2mg/2ml solution for injection vials  
28 Oncovin 1mg/1ml solution for injection vials (Eli Lilly and Company Ltd)  
29 Vindesine 5mg powder for solution for injection vials  
30 Eldisine 5mg powder for solution for injection vials (Thornton & Ross Ltd)  
31 Vinorelbine 50mg/5ml solution for infusion vials  
32 Vinorelbine 10mg/1ml solution for infusion vials  
33 Navelbine 80mg capsules (Pierre Fabre Ltd)  
34 Vinorelbine 30mg capsules  
35 Vinorelbine 20mg capsules  
36 Navelbine 50mg/5ml concentrate for solution for infusion vials (Pierre Fabre Ltd)  
37 Navelbine 30mg capsules (Pierre Fabre Ltd)  
38 Vinorelbine 80mg capsules  
39 Navelbine 20mg capsules (Pierre Fabre Ltd)  
40 Navelbine 10mg/1ml concentrate for solution for infusion vials (Pierre Fabre Ltd)  
41 Vismodegib 150mg capsules  
42 Erivedge 150mg capsules (Roche Products Ltd)  
43 Erivedge 150mg capsules (Roche Products Ltd)  
44  
45  
46  
47  
48  
49  
50  
51  
52  
53  
54  
55  
56  
57  
58  
59  
60

1  
2  
3  
4  
5  
6  
7  
8  
9  
10  
11  
12  
13  
14  
15  
16  
17  
18  
19  
20  
21  
22  
23  
24  
25  
26  
27  
28  
29  
30  
31  
32  
33  
34  
35  
36  
37  
38  
39  
40  
41  
42  
43  
44  
45  
46  
47  
48  
49  
50  
51  
52  
53  
54  
55  
56  
57  
58  
59  
60

ture

For peer review only

1  
2 Medcodeid  
3 106291000006118  
4 114310015  
5 117168016  
6 118218017  
7  
8 11924551000006114  
9 11930831000006111  
10 1227722017  
11 12456601000006116  
12 12456611000006118  
13 12456631000006112  
14 12704471000006116  
15 127091000006118  
16 1549841000006116  
17 1550021000006110  
18 165061000006114  
19 1705621000000113  
20 1726511000006111  
21 176711000006111  
22 177251000006119  
23 177341000006111  
24 181021000006119  
25 1847091000006110  
26 1847111000006118  
27 1847541000006113  
28 1848741000006116  
29 1870801000006111  
30 1905531000006112  
31 191841000006118  
32 191851000006116  
33 191861000006119  
34 191881000006112  
35 191891000006110  
36 191901000006114  
37 1927751000006113  
38 1940501000006119  
39 1940511000006116  
40 1940521000006112  
41 1940531000006110  
42 1940541000006117  
43 1940551000006115  
44 1940581000006111  
45 1940611000006115  
46 1940621000006111  
47 1940631000006114  
48 1940641000006116  
49 1940651000006119  
50 1940661000006117  
51 1940671000006112  
52 215521000000116

For peer review only

1 2189151000000117  
2 2191221000000118  
3 2195121000000113  
4 2195661000000114  
5 2195721000000112  
6 2197961000000113  
7 2198001000000111  
8 2198141000000110  
9 2209021000000112  
10 2209101000000119  
11 2210341000000113  
12 2210381000000117  
13 2211311000000117  
14 2211591000000116  
15 2211671000000119  
16 2234541000000115  
17 2234621000000111  
18 2237821000000118  
19 2237861000000114  
20 2237901000000119  
21 2237981000000112  
22 2238301000000119  
23 2238381000000112  
24 2238421000000115  
25 2240321000000114  
26 2240871000000116  
27 2240951000000115  
28 228101000006113  
29 228111000006111  
30 228121000006115  
31 228131000006117  
32 228211000006117  
33 228221000006113  
34 228231000006111  
35 251923016  
36 2674486017  
37 2675886019  
38 2692168016  
39 272134015  
40 272139013  
41 272140010  
42 272141014  
43 272142019  
44 272153013  
45 272320011  
46 272325018  
47 272326017  
48 272327014  
49 272389014  
50 2767154014

For peer review only

1  
2 2767385013  
3 2773184015  
4 278832011  
5 278834012  
6 278835013  
7 278844014  
8 284213011  
9 2948281000006112  
10 2948291000006110  
11 2948311000006114  
12 2948321000006118  
13 2948331000006115  
14 299665018  
15 299673010  
16 303825013  
17 303826014  
18 303833014  
19 303834015  
20 303838017  
21 303839013  
22 303842019  
23 303843012  
24 303844018  
25 303845017  
26 303846016  
27 303848015  
28 303849011  
29 303853013  
30 303854019  
31 303855018  
32 303863017  
33 303894017  
34 303977015  
35 304071000000115  
36 304091000000116  
37 304111000000114  
38 305162014  
39 305192017  
40 3222381000006114  
41 3222401000006114  
42 3245841000006115  
43 3245851000006118  
44 3245861000006116  
45 3245871000006111  
46 3245881000006114  
47 3246221000006116  
48 3246231000006118  
49 3246241000006111  
50 3246251000006113  
51 3246261000006110

For peer review only

1  
2 3246271000006115  
3 3246281000006117  
4 324973015  
5 3289691000006118  
6 329115018  
7 329116017  
8 329117014  
9 329118016  
10 329118016  
11 3296351000006114  
12 3304611000006115  
13 3304621000006111  
14 3304631000006114  
15 3319141000006113  
16 3347091000006118  
17 349825015  
18 349856011  
19 349998013  
20 353974015  
21 354340015  
22 354341016  
23 354343018  
24 354352010  
25 354417015  
26 354520014  
27 354610013  
28 354612017  
29 354613010  
30 354614016  
31 354615015  
32 354616019  
33 354617011  
34 354618018  
35 354619014  
36 354621016  
37 354623018  
38 354624012  
39 354627017  
40 354628010  
41 357219012  
42 360031000000113  
43 3619221000006118  
44 3619241000006113  
45 3647021000006114  
46 3647031000006112  
47 3647051000006117  
48 3647061000006115  
49 3647071000006110  
50 3647091000006111  
51 3657891000006116  
52 366671000000118  
53  
54  
55  
56  
57  
58  
59  
60

For peer review only



1  
2 372621000000114  
3 375841000000114  
4 380061000000118  
5 380101000000116  
6 384641000006114  
7  
8 384823013  
9 386181000000111  
10 387351000000117  
11 387911000000115  
12  
13 394350012  
14 394352016  
15 394365013  
16 394639018  
17 394640016  
18  
19 394661000006112  
20 3973811000006118  
21 3973841000006119  
22 399381000000115  
23 413415016  
24  
25 4152501000006114  
26 422992018  
27 424791000006110  
28 441151000006115  
29 441161000006118  
30 441211000006110  
31 446291000006111  
32 4542501000006119  
33 4542521000006112  
34 454255014  
35 458521000006111  
36 460644012  
37 460680012  
38 460910019  
39 460911015  
40 461420012  
41 4668951000006113  
42 4668961000006110  
43 4668971000006115  
44 4668981000006117  
45 4669011000006116  
46 4669031000006110  
47 4669051000006115  
48 4669061000006118  
49 4669451000006113  
50 4694051000006116  
51 478131000006115  
52 4788371000006112  
53 4788421000006117  
54 4788461000006111  
55 480871000006117

For peer review only

1 4898631000006119  
2 500371000006119  
3 501594013  
4 5051121000006115  
5 5051131000006117  
6 5051151000006112  
7 5052891000006116  
8 5052901000006117  
9 5052911000006119  
10 5052921000006110  
11 5052931000006113  
12 509111010  
13 5093331000006111  
14 5093341000006118  
15 5093451000006111  
16 5093471000006118  
17 5094141000006118  
18 5095191000006114  
19 5095591000006119  
20 5096141000006114  
21 5120141000006114  
22 5120171000006118  
23 5307111000006113  
24 5486891000006118  
25 5488801000006112  
26 5488811000006110  
27 5524381000006119  
28 557811000000119  
29 557831000000110  
30 5616371000006112  
31 5686451000006112  
32 5907531000006119  
33 5907541000006112  
34 5907551000006114  
35 5907561000006111  
36 5907571000006116  
37 5907581000006118  
38 5907591000006115  
39 595541000000119  
40 595661000000119  
41 595811000000117  
42 595871000000110  
43 595931000000116  
44 595991000000115  
45 596051000000115  
46 596131000000114  
47 596191000000110  
48 596261000000111  
49 596321000000110  
50 596401000000111

For peer review only

1  
2 6002501000006116  
3 600481000006118  
4 615611000006116  
5 618391000000118  
6 618411000000118  
7 618431000000114  
8 618441000000117  
9 618451000000119  
10 618461000000116  
11 618471000000111  
12 618481000000113  
13 618491000000110  
14 618501000000116  
15 618511000000119  
16 618521000000113  
17 618541000006116  
18 637771000000113  
19 638111000000115  
20 641471000006117  
21 641491000006116  
22 663551000006118  
23 677461000006115  
24 677471000006110  
25 677481000006113  
26 677561000006119  
27 677621000006112  
28 703481000006116  
29 7068291000006112  
30 7081801000006114  
31 7091541000006113  
32 710221000006113  
33 7118431000006118  
34 7118441000006111  
35 7118451000006113  
36 713611000006110  
37 713671000006118  
38 7147781000006115  
39 7174791000006111  
40 7174851000006111  
41 7367691000006114  
42 7367701000006114  
43 7367721000006116  
44 7367731000006118  
45 7367741000006111  
46 743721000006115  
47 754061000006111  
48 754781000006116  
49 7688001000006116  
50 7688041000006119  
51 7688541000006114

For peer review only

1  
2 773041000006111  
3 789941000006117  
4 8104101000006118  
5 8104161000006117  
6 8104231000006115  
7 8104261000006112  
8 8104301000006115  
9 8104351000006116  
10 8104381000006112  
11 8104411000006110  
12 8104451000006111  
13 8104481000006115  
14 8104511000006111  
15 8104551000006112  
16 81307015  
17 8345611000006110  
18 8345731000006113  
19 8345881000006116  
20 8345901000006119  
21 8345931000006110  
22 8346001000006110  
23 8346021000006117  
24 8346041000006112  
25 8346101000006114  
26 8346121000006116  
27 8346151000006113  
28 8346171000006115  
29 8346201000006116  
30 8346221000006114  
31 84262013  
32 866731000006115  
33 866751000006110  
34 86957016  
35 877641000006113  
36 900121000006113  
37 90461000006118  
38 90471000006113  
39 906351000006116  
40 988961000006115  
41 994421000006111  
42 994431000006114  
43 994441000006116  
44 105227013  
45 304060010  
46 3125951000006110  
47 7978191000006116  
48 4353721000006111  
49 304067013  
50 65241012  
51 108231015

For peer review only

1 39884018  
2  
3 4353731000006114  
4 4789351000006110  
5 3125961000006112  
6 4355511000006111  
7 4789231000006111  
8 4789241000006118  
9 585761000006118  
10 304061014  
11 7613791000006118  
12 7005451000006113  
13 3529461000006113  
14 354330018  
15 61575019  
16 5847371000006111  
17 28322010  
18 553191000006115  
19 304004016  
20 304005015  
21 8120501000006112  
22 555371000006118  
23 555381000006115  
24 304011017  
25 8013961000006110  
26 555391000006117  
27 8117911000006114  
28 553181000006118  
29 553201000006117  
30 303906011  
31 304056012  
32 304058013  
33 303806010  
34 12717101000006112  
35 303903015  
36 303902013  
37 303876011  
38 304063012  
39 304062019  
40 736981000006111  
41 7996161000006117  
42 703451000006112  
43 704871000006119  
44 742231000006118  
45 5014791000006110  
46 715441000006113  
47 739121000006119  
48 12472421000006113  
49 8120551000006111  
50 8120561000006113  
51 394551000006114  
52  
53  
54  
55  
56  
57  
58  
59  
60

For peer review only

1 712841000006115  
2 742241000006111  
3 394561000006111  
4 745481000006111  
5 304013019  
6 710491000006114  
7 7724951000006114  
8 3806551000006114  
9 3466101000006111  
10 8118551000006119  
11 3466081000006115  
12 7724961000006111  
13 5093751000006115  
14 3734071000006111  
15 8118471000006113  
16 354380012  
17 3466091000006117  
18 5093771000006113  
19 458441000006117  
20 3466111000006114  
21 3734061000006116  
22 3734051000006118  
23 5093761000006118  
24 3734081000006114  
25 388811000006119  
26 189181000006115  
27 5093781000006111  
28 7724971000006116  
29 81261000006110  
30 12704531000006115  
31 3072641000006116  
32 7689691000006113  
33 2573591000006113  
34 5093801000006110  
35 189171000006118  
36 7725071000006116  
37 821741000006112  
38 8118531000006114  
39 7725081000006118  
40 430101000006111  
41 354347017  
42 7725091000006115  
43 455321000006114  
44 4788491000006115  
45 7642391000006117  
46 7762351000006113  
47 5322751000006116  
48 5322741000006118  
49 2765411000006114  
50 303948016

For peer review only

1  
2 28321015  
3 3833151000006119  
4 554481000006111  
5 35171019  
6 2832821000006115  
7 303869018  
8 303870017  
9 4788511000006114  
10 303864011  
11 303866013  
12 8035251000006111  
13 7691501000006119  
14 7691491000006110  
15 2737251000006112  
16 11777411000006113  
17 8048001000006110  
18 8035261000006113  
19 3437381000006110  
20 303883016  
21 666291000006116  
22 5095521000006116  
23 5335261000006115  
24 3489801000006110  
25 3489751000006115  
26 5094341000006115  
27 3835261000006113  
28 5094371000006111  
29 354324018  
30 5095401000006113  
31 3030001000006112  
32 354441017  
33 354544011  
34 5094391000006112  
35 3489781000006111  
36 3489791000006114  
37 305172012  
38 5094361000006116  
39 7565541000006110  
40 3489771000006113  
41 5094441000006111  
42 3865371000006116  
43 7021571000006112  
44  
45  
46  
47  
48  
49  
50  
51  
52  
53  
54  
55  
56  
57  
58  
59  
60

For peer review only

1 Term  
2  
3 thomas intravascular shunt for dialysis  
4 Lupus nephritis  
5 renal transplant  
6 peritoneal dialysis  
7  
8 end-stage renal disease  
9 infection of hemodialysis arteriovenous fistula  
10 [v]aftercare involving renal dialysis nos  
11 [v]aftercare involving extracorporeal dialysis  
12 [v]aftercare involving intermittent dialysis  
13 [v]aftercare involving renal dialysis nos  
14  
15 end-stage renal disease  
16 steroid sensitive nephrotic syndrome  
17 allotransplantation kidney from cadaver, heart non-beating  
18 os interventions associated with transplantation of kidney  
19 rpd prog neph syn df mesangial proliferatv glomerulonephritis  
20 flushing of peritoneal dialysis catheter  
21 acute-on-chronic renal failure  
22 renal dialysis with complication, without blame  
23 renal transplant with complication, without blame  
24 renal tubulo-interstitial disordrs in transplant rejectn  
25 removal of ambulatory peritoneal dialysis catheter  
26 aneurysm of superficialised artery of dialysis av fistula  
27 aneurysm of anastomotic site of dialysis av fistula  
28 wilms' tumour + nephrotic syndrome + pseudohermaphroditism  
29 disorders associated with peritoneal dialysis  
30 infection of dialysis arteriovenous fistula  
31 excision of rejected transplanted kidney  
32 rapid prog neph syn df mesangiocapillary glomerulonephritis  
33 rapid progres neph syn df endocapillary prolifv glomnephritis  
34 rapid progres neph syn diffuse membranous glomerulonephritis  
35 rapid progres nephritic syn df crescentic glomerulonephritis  
36 rapid progres nephritic syn focal+segmental glomerulr lesion  
37 rapid progressive nephritic syndrome, dense deposit disease  
38 disorder associated with dialysis  
39  
40 ckd with gfr category g4 & albuminuria category a1  
41 ckd with gfr category g4 & albuminuria category a2  
42 ckd with gfr category g4 & albuminuria category a3  
43 ckd with gfr category g5 & albuminuria category a1  
44 ckd with gfr category g5 & albuminuria category a2  
45 ckd with gfr category g5 & albuminuria category a3  
46 ckd with gfr category g1 & albuminuria category a3  
47 ckd with gfr category g2 & albuminuria category a3  
48 ckd with gfr category g3a & albuminuria category a1  
49 ckd with gfr category g3a & albuminuria category a2  
50 ckd with gfr category g3a & albuminuria category a3  
51 ckd with gfr category g3b & albuminuria category a1  
52 ckd with gfr category g3b & albuminuria category a2  
53 ckd with gfr category g3b & albuminuria category a3  
54  
55 end stage renal failure



1 urological complication of renal transplant  
2 vascular complication of renal transplant  
3 ruptured aneurysm of dialysis vascular access  
4 aneurysm of dialysis arteriovenous fistula  
5 aneurysm of needle site of dialysis arteriovenous fistula  
6 rupture of artery of transplanted kidney  
7 rupture of vein of transplanted kidney  
8 stenosis of vein of transplanted kidney  
9 aneurysm of vein of transplanted kidney  
10 aneurysm of artery of transplanted kidney  
11 stenosis of dialysis vascular access  
12 thrombosis of dialysis vascular access  
13 haemodialysis first use syndrome  
14 thrombus in peritoneal dialysis catheter  
15 anaphylactoid reaction due to haemodialysis  
16 thrombosis of artery of transplanted kidney  
17 thrombosis of vein of transplanted kidney  
18 occlusion of dialysis vascular access  
19 infection of dialysis vascular access  
20 haemorrhage of dialysis vascular access  
21 stenosis of dialysis arteriovenous graft  
22 thrombosis of dialysis arteriovenous fistula  
23 occlusion of dialysis arteriovenous graft  
24 occlusion of dialysis arteriovenous fistula  
25 infection of dialysis arteriovenous graft  
26 haemorrhage of dialysis arteriovenous fistula  
27 rupture of dialysis arteriovenous graft  
28 placement ambulatory apparatus compensation renal failure  
29 placement ambulatory apparatus- compensate renal failure nos  
30 placement ambulatory apparatus- compensate renal failure os  
31 placement ambulatory dialysis apparatus - compens renal fail  
32 placement other apparatus for compensation for renal failure  
33 placement other apparatus- compensate for renal failure nos  
34 placement other apparatus- compensate for renal failure os  
35 h/o: kidney recipient  
36 extracorporeal albumin haemodialysis  
37 creation of graft fistula for dialysis  
38 automated peritoneal dialysis  
39 insertion of arteriovenous prosthesis  
40 attention to arteriovenous shunt  
41 removal of infected arteriovenous shunt  
42 other specified arteriovenous shunt  
43 arteriovenous shunt nos  
44 ligation of acquired arteriovenous fistula  
45 allotransplantation of kidney from live donor  
46 cadaveric renal transplant  
47 other specified transplantation of kidney  
48 transplantation of kidney nos  
49 exploration of renal transplant  
50 chronic kidney disease stage 5

1 chronic kidney disease stage 4  
2 chronic kidney disease stage 3  
3 haemodialysis nec  
4 other specified compensation for renal failure  
5 compensation for renal failure nos  
6 insertion of temporary peritoneal dialysis catheter  
7 renal transplant planned  
8 arteriovenous fistulisation  
9 arteriovenous fistulization  
10 creation of surgical arteriovenous fistula  
11 construction of arteriovenous fistula  
12 av - creation of arteriovenous fistula  
13 hypertensive renal disease with renal failure  
14 hypertensive heart and renal disease with renal failure  
15 nephrotic syndrome with proliferative glomerulonephritis  
16 nephrotic syndrome with membranous glomerulonephritis  
17 nephrotic syndrome, focal and segmental glomerular lesions  
18 nephrotic syndrome, diffuse membranous glomerulonephritis  
19 nephrotic syndrome, dense deposit disease  
20 nephrotic syndrome, diffuse crescentic glomerulonephritis  
21 congenital finnish nephrosis  
22 congenital nephrotic syndrome nos  
23 nephrotic syndrome in diseases ec  
24 nephrotic syndrome in amyloidosis  
25 nephrotic syndrome in diabetes mellitus  
26 nephrotic syndrome in malaria  
27 nephrotic syndrome in polyarteritis nodosa  
28 nephrotic syndrome in diseases ec nos  
29 nephrotic syndrome with other pathological kidney lesions  
30 nephrotic syndrome nos  
31 chronic rapidly progressive glomerulonephritis  
32 rapidly progressive nephritis unspecified  
33 rapidly progressive nephritic syndrome  
34 chronic kidney disease stage 3  
35 chronic kidney disease stage 4  
36 chronic kidney disease stage 5  
37 [x]rapidly progressive nephritic syndrome, other  
38 [x]other chronic renal failure  
39 idiopathic nephrotic syndrome  
40 light negative glomerulonephritis  
41 end stage kidney disease  
42 esrf - end stage renal failure  
43 escrf - end stage chronic renal failure  
44 esrd - end stage renal disease  
45 end stage chronic renal failure  
46 surgical construction of arteriovenous shunt  
47 formation of arteriovenous shunt  
48 arteriovenous shunt  
49 arteriovenostomy  
50 creation of arteriovenous shunt

1 av - creation of arteriovenous shunt  
2 construction of arteriovenous shunt  
3 kidney transplant failure and rejection  
4 familial nephrotic syndrome  
5 failure of sterile precautions during perfusion  
6 failure of sterile precautions during kidney dialysis  
7 failure of sterile precautions during other perfusion  
8 failure of sterile precautions during perfusion nos  
9 hypertensive renal failure  
10 anemia of chronic renal failure  
11 anemia of chronic renal insufficiency  
12 anaemia of chronic renal insufficiency  
13 goodpasture syndrome  
14 ns - nephrotic syndrome  
15 creation of brachial-cephalic fistula  
16 banding of arteriovenous fistula  
17 haemofiltration  
18 xenograft renal transplant  
19 congenital nephrotic syndrome with focal glomerulosclerosis  
20 nephrotic syndrome with pseudohermaphroditism  
21 drash syndrome  
22 rapidly progressive glomerulonephritis  
23 acute-on-chronic renal failure  
24 goodpasture's disease  
25 renal transplant rejection  
26 accelerated rejection of renal transplant  
27 very mild acute rejection of renal transplant  
28 borderline changes of acute rejection  
29 acute rejection of renal transplant  
30 acute rejection of renal transplant - grade i  
31 acute rejection of renal transplant - grade ii  
32 acute rejection of renal transplant - grade iii  
33 chronic rejection of renal transplant  
34 chronic transplant nephropathy  
35 chronic rejection of renal transplant - grade 1  
36 chronic rejection of renal transplant - grade ii  
37 chronic rejection of renal transplant - grade iii  
38 acute-on-chronic rejection of renal transplant  
39 continuous ambulatory peritoneal dialysis  
40 thrombectomy of arteriovenous fistula  
41 sle glomerulonephritis syndrome  
42 Systemic lupus erythematosus glomerulonephritis syndrome  
43 transplant of kidney  
44 kidney transplantation  
45 tx - renal transplantation  
46 kidney transplant  
47 tx - kidney transplantation  
48 renal graft  
49 pd - peritoneal dialysis  
50 interventions associated with transplantation of kidney

1  
2 allotransplantation of kidney from cadaver, heart-beating  
3 peritoneal dialysis nec  
4 interventions associated with transplantation of kidney nos  
5 post-transplantation of kidney examination, recipient  
6 [x]failure sterile precautions dur kidney dialys/other perf  
7 arteriovenous shunt  
8 pre-transplantation of kidney work-up, recipient  
9 post-transplantation of kidney examination, live donor  
10 pre-transplantation of kidney work-up, live donor  
11 creation of arteriovenous fistula nec  
12 repair of acquired arteriovenous fistula  
13 transplant nephrectomy  
14 compensation for renal failure  
15 renal dialysis  
16 [x]kidny dialysis caus abn reac pt/lat comp no misad at time  
17 chronic renal failure syndrome  
18 crf - chronic renal failure  
19 allotransplantation of kidney from cadaver nec  
20 unexplained episode of renal transplant dysfunction  
21 dialysis procedure  
22 excision of rejected transplanted kidney  
23 [x]renal tubulo-interstitial disorders/transplant rejection  
24 accid cut,puncture,perf,h'ge - kidney dialysis  
25 accid cut,puncture,perf,h'ge - kidney dialysis/oth perfusion  
26 accid cut,puncture,perf,h'ge - perfusion nos  
27 accidental cut/puncture/perf/haem'ge during renal dialysis  
28 history of renal transplant  
29 history of - kidney recipient  
30 anaemia secondary to renal failure  
31 acute nephrotic syndrm diffuse crescentic glomerulonephritis  
32 [v]kidney transplanted  
33 [v]renal dialysis status  
34 [v]aftercare involving intermittent dialysis  
35 [v]aftercare involving extracorporeal dialysis  
36 [x]other dialysis  
37 autotransplantation of kidney  
38 autotransplant kidney  
39 renal autotransplantation  
40 renal autotransplantation or reimplantation of kidney  
41 live donor renal allotransplant  
42 live donor renal allograft  
43 cadaver renal allotransplant  
44 cadaver renal allograft  
45 exploration of kidney transplant  
46 removal of chronic ambulatory peritoneal dialysis catheter  
47 allotransplantation of kidney from cadaver  
48 cnf - finnish congenital nephrotic syndrome  
49 nephrotic syndrome due to diabetes mellitus  
50 malarial nephrosis  
51 anaemia secondary to chronic renal failure  
52  
53  
54  
55  
56  
57  
58  
59  
60

1  
2 accidental cut, puncture, perforation or hemorrhage during kidney dialysis  
3 autotransplant of kidney  
4 transplantation of kidney  
5 creation of cimino fistula  
6 creation of brescia-cimino fistula  
7 creation brachiocephalic fistula  
8 hf - hemofiltration  
9 hf - haemofiltration  
10 hemofiltration  
11 haemofiltration therapy  
12 hemofiltration therapy  
13 chronic renal failure  
14 steroid-responsive nephrotic syndrome  
15 ssns - steroid-sensitive nephrotic syndrome  
16 wilms' tumor and nephrotic syndrome with pseudohermaphroditism  
17 rpgn - rapidly progressive glomerulonephritis  
18 acute on chronic renal failure  
19 goodpasture disease  
20 first use syndrome of dialysis  
21 chronic allograft nephropathy  
22 flushing of chronic ambulatory peritoneal dialysis catheter  
23 capd - continuous ambulatory peritoneal dialysis  
24 dialysis observation  
25 removal of transplanted kidney  
26 kidney dialysis  
27 artificial kidney dialysis  
28 chronic ambulatory peritoneal dialysis catheter procedure  
29 chronic kidney disease stage 3a  
30 chronic kidney disease stage 3b  
31 av - procedure related to surgical arteriovenous connection  
32 removal of rejected kidney  
33 hemodialysis procedure  
34 hd - hemodialysis  
35 hd - haemodialysis  
36 haemodialysis procedure  
37 extracorporeal hemodialysis  
38 extracorporeal haemodialysis  
39 hemodialysis  
40 chronic kidney disease stage 1 with proteinuria  
41 chronic kidney disease stage 2 with proteinuria  
42 chronic kidney disease stage 3 with proteinuria  
43 chronic kidney disease stage 3 without proteinuria  
44 chronic kidney disease stage 3a with proteinuria  
45 chronic kidney disease stage 3a without proteinuria  
46 chronic kidney disease stage 3b with proteinuria  
47 chronic kidney disease stage 3b without proteinuria  
48 chronic kidney disease stage 4 with proteinuria  
49 chronic kidney disease stage 4 without proteinuria  
50 chronic kidney disease stage 5 with proteinuria  
51 chronic kidney disease stage 5 without proteinuria  
52  
53  
54  
55  
56  
57  
58  
59  
60

1 anemia secondary to renal failure  
2 creation of radial-cephalic fistula  
3 det.ren.func.after ren.transpl  
4 ckd stage 1 with proteinuria  
5 ckd stage 2 with proteinuria  
6 ckd stage 3 with proteinuria  
7 ckd stage 3 without proteinuria  
8 ckd stage 3a with proteinuria  
9 ckd stage 3a without proteinuria  
10 ckd stage 3b with proteinuria  
11 ckd stage 3b without proteinuria  
12 ckd stage 4 with proteinuria  
13 ckd stage 4 without proteinuria  
14 ckd stage 5 with proteinuria  
15 ckd stage 5 without proteinuria  
16 dialysis for renal failure  
17 ligation of arteriovenous dialysis fistula  
18 ligation of arteriovenous dialysis graft  
19 end stage renal failure  
20 end-stage renal disease  
21 failure of sterile precautions during renal dialysis  
22 nephrotic syn difus mesangial proliferativ glomerulonephritis  
23 nephrotic syn,diffuse mesangiocapillary glomerulonephritis  
24 nephrotic syn,difus endocapillary proliftv glomerulonephritis  
25 Nephrotic syndrome in systemic lupus erythematosus  
26 nephrotic syndrome+membranoproliferative glomerulonephritis  
27 microcystic type congenital nephrotic syndrome  
28 extracorporeal albumin hemodialysis  
29 removal of thrombus of arteriovenous fistula  
30 post-transplantation of kidney examination of recipient  
31 finnish nephrosis syndrome  
32 infection of arteriovenous graft for haemodialysis  
33 infection of arteriovenous graft for hemodialysis  
34 infection of dialysis graft  
35 mechanical failure of apparatus during kidney dialysis  
36 mechanical failure of apparatus during renal dialysis  
37 ckd stage 4  
38 ckd stage 3  
39 ckd stage 5  
40 infection of haemodialysis arteriovenous fistula  
41 infection of arteriovenous fistula for hemodialysis  
42 infection of hd av fistula  
43 infection of hd arteriovenous fistula  
44 infection of arteriovenous fistula for haemodialysis  
45 ligation of acquired arteriovenous fistula  
46 kidney transplant with complication, without blame  
47 kidney dialysis with complication, without blame  
48 allotransplantation of kidney with dbd (donation after brain stem death)  
49 allotransplantation of kidney with dcd (donation after cardiac death)  
50 transplantation of kidney regime

1  
2 insertion of ambulatory peritoneal dialysis catheter  
3 hyperten heart&renal dis+both(congestv)heart and renal fail  
4 ckd (chronic kidney disease stage) 1 with proteinuria  
5 ckd (chronic kidney disease) stage 2 with proteinuria  
6 ckd (chronic kidney disease) stage 3 with proteinuria  
7 ckd (chronic kidney disease) stage 3 without proteinuria  
8 ckd (chronic kidney disease) stage 3a with proteinuria  
9 ckd (chronic kidney disease) stage 3a without proteinuria  
10 ckd (chronic kidney disease) stage 3b with proteinuria  
11 ckd (chronic kidney disease) stage 3b without proteinuria  
12 ckd (chronic kidney disease) stage 4 with proteinuria  
13 ckd (chronic kidney disease) stage 4 without proteinuria  
14 ckd (chronic kidney disease) stage 5 with proteinuria  
15 ckd (chronic kidney disease) stage 5 without proteinuria  
16 congenital nephrotic syndrome  
17 chronic kidney disease with glomerular filtration rate category g1 and albuminuria category a3  
18 chronic kidney disease with glomerular filtration rate category g2 and albuminuria category a3  
19 chronic kidney disease with glomerular filtration rate category g3a and albuminuria category a1  
20 chronic kidney disease with glomerular filtration rate category g3a and albuminuria category a2  
21 chronic kidney disease with glomerular filtration rate category g3a and albuminuria category a3  
22 chronic kidney disease with glomerular filtration rate category g3b and albuminuria category a1  
23 chronic kidney disease with glomerular filtration rate category g3b and albuminuria category a2  
24 chronic kidney disease with glomerular filtration rate category g3b and albuminuria category a3  
25 chronic kidney disease with glomerular filtration rate category g4 and albuminuria category a1  
26 chronic kidney disease with glomerular filtration rate category g4 and albuminuria category a2  
27 chronic kidney disease with glomerular filtration rate category g4 and albuminuria category a3  
28 chronic kidney disease with glomerular filtration rate category g5 and albuminuria category a1  
29 chronic kidney disease with glomerular filtration rate category g5 and albuminuria category a2  
30 chronic kidney disease with glomerular filtration rate category g5 and albuminuria category a3  
31 goodpasture's syndrome  
32 kidney replacement nos  
33 kidney replacement  
34 nephrotic syndrome  
35 extracorporeal kidney  
36 renal transplant rejected  
37 transplantation of kidney from cadaver  
38 transplantation of kidney from live donor  
39 [rfc] renal transplant  
40 renal transplant rejected  
41 chronic kidney disease stage 3  
42 chronic kidney disease stage 4  
43 chronic kidney disease stage 5  
44 Chronic pyelonephritis  
45 Chronic pyelonephritis without medullary necrosis  
46 XGP - Xanthogranulomatous pyelonephritis  
47 Obstructive pyelonephritis  
48 Subacute pyelonephritis  
49 Chronic pyelonephritis NOS  
50 Xanthogranulomatous pyelonephritis  
51 Tuberculous pyelonephritis



1  
2 Calculous pyelonephritis  
3 Healed pyelonephritis  
4 Secondary pyelonephritis  
5 XGPN - Xanthogranulomatous pyelonephritis  
6 Diffuse pyelonephritis  
7  
8 Non-obstructive reflux-associated chronic pyelonephritis  
9 Chronic non-obstructive atrophic pyelonephritis  
10 Nonobstructive reflux-associated chronic pyelonephritis  
11 Chronic pyelonephritis with medullary necrosis  
12 Familial non-obstructive reflux-associated chronic pyelonephritis  
13 Recurrent obstructive pyelonephritis  
14 CPN - Chronic pyelonephritis  
15 Chronic obstructive pyelonephritis  
16 Renal dwarfism  
17 Acute renal papillary necrosis with renal failure  
18 Renal rickets  
19 Chronic nephritic syndrome, diffuse endocapillary proliferative glomerulonephritis  
20 Chronic nephritic syndrome  
21 Chronic nephritic syndrome, minor glomerular abnormality  
22 Chronic nephritic syndrome co-occurrent and due to membranoproliferative glomerulonephritis type III  
23 Chronic nephritic syndrome, diffuse mesangiocapillary glomerulonephritis  
24 Chronic nephritic syndrome, diffuse crescentic glomerulonephritis  
25 Chronic nephritic syndrome, dense deposit disease  
26 Chronic nephritic syndrome with membranous glomerulonephritis  
27 Chronic nephritic syndrome, focal and segmental glomerular lesions  
28 Morphologic change of kidney due to chronic nephritic syndrome  
29 Chronic nephritic syndrome, diffuse mesangial proliferative glomerulonephritis  
30 Chronic nephritic syndrome, diffuse membranous glomerulonephritis  
31 Other nephritis and nephrosis NOS  
32 Other specified nephritis, nephrosis or nephrotic syndrome  
33 Nephritis, nephrosis and nephrotic syndrome NOS  
34 Nephritis, nephrosis and nephrotic syndrome  
35 Nephritis, nephrosis and nephrotic syndrome  
36 Other nephritis and nephrosis in diseases EC  
37 Other nephritis and nephrosis unspecified  
38 Membranoproliferative nephritis unspecified  
39 Chronic pyonephrosis  
40 Chronic pyelitis  
41 Isolated proteinuria, with oth specif morpholog changes  
42 Isolated proteinuria  
43 Isolated proteinuria with specified morphological lesion, diffuse concentric glomerulonephritis  
44 Isolated proteinuria with specified morphological lesion, dense deposit disease  
45 Isolated proteinuria with specified morphological lesion, diffuse endocapillary proliferative glomerulonephriti  
46 Isolated non-nephrotic proteinuria  
47 Isolated proteinuria with specified morphological lesion, focal and segmental glomerular lesions  
48 Isolated proteinuria, with unspecified morpholog changes  
49 [X]Isolated proteinuria, with unspecified morphological changes  
50 Isolated proteinuria co-occurrent and due to membranoproliferative glomerulonephritis type III  
51 Isolated proteinuria co-occurrent and due to membranoproliferative glomerulonephritis type 3  
52 [X]Isolated proteinuria, with oth specif morpholog changes  
53  
54  
55  
56  
57  
58  
59  
60



- 1
- 2 Isolated proteinuria with specified morphological lesion, diffuse membranous glomerulonephritis
- 3 Isolated proteinuria with specified morphological lesion, diffuse mesangial proliferative glomerulonephritis
- 4 [X]Isolated proteinuria, with unspecified morphological changes
- 5 Isolated proteinuria with specified morphological lesion, diffuse mesangiocapillary glomerulonephritis
- 6 Isolated proteinuria with specified morphological lesion
- 7 Isolated proteinuria with specified morphological lesion, minor glomerular abnormality
- 8 Recurrent haematuria co-occurrent and due to diffuse mesangiocapillary glomerulonephritis
- 9 MCGN - Mesangiocapillary glomerulonephritis
- 10 Mesangiocapillary glomerulonephritis type II
- 11 Hereditary diffuse mesangiocapillary glomerulonephritis
- 12 Mesangiocapillary glomerulonephritis, type II
- 13 Persistent haematuria co-occurrent and due to diffuse mesangiocapillary glomerulonephritis
- 14 Mesangiocapillary glomerulonephritis type III
- 15 Subendothelial mesangiocapillary glomerulonephritis
- 16 Hereditary mesangiocapillary glomerulonephritis, type 2
- 17 Mesangiocapillary glomerulonephritis
- 18 MCGNdd - Mesangiocapillary glomerulonephritis, dense deposit
- 19 Mesangiocapillary glomerulonephritis type IV
- 20 Acute nephritic syndrome, diffuse mesangiocapillary glomerulonephritis
- 21 MCGN type II - Mesangiocapillary glomerulonephritis type II
- 22 MCGN type I - Mesangiocapillary glomerulonephritis type I
- 23 Mesangiocapillary glomerulonephritis, type I
- 24 MCGN type III - Mesangiocapillary glomerulonephritis type III
- 25 Mesangiocapillary glomerulonephritis type I
- 26 [X]Hereditary nephropathy NEC diffuse mesangiocapillary glomerulonephritis
- 27 Recurrent haematuria co-occurrent and due to diffuse mesangiocapillary glomerulonephritis
- 28 MCGN type IV - Mesangiocapillary glomerulonephritis type IV
- 29 Persistent haematuria co-occurrent and due to diffuse mesangiocapillary glomerulonephritis
- 30 Unspecified nephritic syndrome, diffuse mesangial proliferative glomerulonephritis
- 31 Chronic mesangial proliferative glomerulonephritis
- 32 Mesangial proliferative glomerulonephritis
- 33 Focal mesangial proliferative glomerulonephritis
- 34 SLE with mesangial proliferative glomerulonephritis
- 35 Mesangial IgM proliferative glomerulonephritis
- 36 Recurrent haematuria co-occurrent and due to diffuse mesangial proliferative glomerulonephritis
- 37 Recurrent haematuria co-occurrent and due to diffuse mesangial proliferative glomerulonephritis
- 38 Hereditary nephropathy NEC diffuse mesangial proliferative glomerulonephritis
- 39 Hereditary diffuse mesangial proliferative glomerulonephritis
- 40 Persistent haematuria co-occurrent and due to diffuse mesangial proliferative glomerulonephritis
- 41 [X]Unspecified nephritic syndrome, diffuse mesangial proliferative glomerulonephritis
- 42 Chronic mesangial proliferative glomerulonephritis
- 43 Persistent haematuria co-occurrent and due to diffuse mesangial proliferative glomerulonephritis
- 44 Acute nephritic syndrome, diffuse mesangial proliferative glomerulonephritis
- 45 PGN - Chronic mesangial proliferative glomerulonephritis
- 46 Mixed renal osteodystrophy
- 47 Suspected renal osteodystrophy
- 48 ROD - Renal osteodystrophy, assessment
- 49 Renal osteodystrophy assessment
- 50 ROD - Renal osteodystrophy
- 51 Renal osteodystrophy NOS

1 Renal osteodystrophy  
2  
3 Renal secondary osteodystrophia fibrosa  
4 Chronic glomerulonephritis + diseases EC  
5 Chronic glomerulonephritis  
6 CGN - Chronic glomerulonephritis  
7  
8 Other chronic glomerulonephritis NOS  
9 Chronic glomerulonephritis NOS  
10 Chronic glomerulonephritis associated with another disorder  
11 Other chronic glomerulonephritis  
12 Chronic exudative glomerulonephritis  
13  
14 End stage renal disease due to hypertension  
15 ESRD (End stage renal disease) due to benign hypertension  
16 End stage renal disease due to benign hypertension  
17 Renal sclerosis with hypertension  
18 Renal disease due to hypertension  
19  
20 End stage renal disease on dialysis due to hypertension  
21 ESRD (End stage renal disease) due to hypertension  
22 Parenchymal renal hypertension  
23 Other familial glomerulonephritis  
24 Familial glomerulonephritis in Alport's syndrome  
25 Familial lobular glomerulopathy  
26 Familial hypoplastic, glomerulocystic kidney  
27  
28 CIN - Chronic interstitial nephritis  
29 Chronic interstitial nephritis  
30  
31 Chronic drug-induced tubulointerstitial nephritis  
32 Idiopathic chronic interstitial nephritis  
33 Chronic drug induced tubulointerstitial nephritis  
34 Chronic infective interstitial nephritis  
35 Chronic toxic interstitial nephritis  
36 Chronic arteriosclerotic nephritis  
37  
38 Chronic interstitial nephritis due to heavy metals  
39 Chronic radiation nephritis  
40 Chronic interstitial nephritis caused by heavy metals  
41 CTIN - Chronic tubulo-interstitial nephritis  
42 Chronic tubulo-interstitial nephritis  
43 [X]Other chronic tubulo-interstitial nephritis  
44 Chronic drug-induced interstitial nephritis  
45 Acute on chronic interstitial nephritis  
46  
47 Chronic tubulointerstitial nephritis  
48 Granulomatous interstitial nephritis  
49 Familial interstitial nephritis  
50 Idiopathic interstitial nephritis  
51  
52  
53  
54  
55  
56  
57  
58  
59  
60

1  
2  
3  
4  
5  
6  
7  
8  
9  
10  
11  
12  
13  
14  
15  
16  
17  
18  
19  
20  
21  
22  
23  
24  
25  
26  
27  
28  
29  
30  
31  
32  
33  
34  
35  
36  
37  
38  
39  
40  
41  
42  
43  
44  
45  
46  
47  
48  
49  
50  
51  
52  
53  
54  
55  
56  
57  
58  
59  
60

For peer review only

1  
2  
3  
4  
5  
6  
7  
8  
9  
10  
11  
12  
13  
14  
15  
16  
17  
18  
19  
20  
21  
22  
23  
24  
25  
26  
27  
28  
29  
30  
31  
32  
33  
34  
35  
36  
37  
38  
39  
40  
41  
42  
43  
44  
45  
46  
47  
48  
49  
50  
51  
52  
53  
54  
55  
56  
57  
58  
59  
60

For peer review only

1  
2  
3  
4  
5  
6  
7  
8  
9  
10  
11  
12  
13  
14  
15  
16  
17  
18  
19  
20  
21  
22  
23  
24  
25  
26  
27  
28  
29  
30  
31  
32  
33  
34  
35  
36  
37  
38  
39  
40  
41  
42  
43  
44  
45  
46  
47  
48  
49  
50  
51  
52  
53  
54  
55  
56  
57  
58  
59  
60

For peer review only

1  
2  
3  
4  
5  
6  
7  
8  
9  
10  
11  
12  
13  
14  
15  
16  
17  
18  
19  
20  
21  
22  
23  
24  
25  
26  
27  
28  
29  
30  
31  
32  
33  
34  
35  
36  
37  
38  
39  
40  
41  
42  
43  
44  
45  
46  
47  
48  
49  
50  
51  
52  
53  
54  
55  
56  
57  
58  
59  
60

For peer review only

1  
2  
3  
4  
5  
6  
7  
8  
9  
10  
11  
12  
13  
14  
15  
16  
17  
18  
19  
20  
21  
22  
23  
24  
25  
26  
27  
28  
29  
30  
31  
32  
33  
34  
35  
36  
37  
38  
39  
40  
41  
42  
43  
44  
45  
46  
47  
48  
49  
50  
51  
52  
53  
54  
55  
56  
57  
58  
59  
60

For peer review only

1  
2  
3  
4  
5  
6  
7  
8  
9  
10  
11  
12  
13  
14  
15  
16  
17  
18  
19  
20  
21  
22  
23  
24  
25  
26  
27  
28  
29  
30  
31  
32  
33  
34  
35  
36  
37  
38  
39  
40  
41  
42  
43  
44  
45  
46  
47  
48  
49  
50  
51  
52  
53  
54  
55  
56  
57  
58  
59  
60

For peer review only



1  
2  
3  
4  
5  
6  
7  
8  
9  
10  
11  
12  
13  
14  
15  
16  
17  
18  
19  
20  
21  
22  
23  
24  
25  
26  
27  
28  
29  
30  
31  
32  
33  
34  
35  
36  
37  
38  
39  
40  
41  
42  
43  
44  
45  
46  
47  
48  
49  
50  
51  
52  
53  
54  
55  
56  
57  
58  
59  
60

For peer review only

1  
2  
3  
4  
5  
6  
7  
8  
9  
10  
11  
12  
13  
14  
15  
16  
17  
18  
19  
20  
21  
22  
23  
24  
25  
26  
27  
28  
29  
30  
31  
32  
33  
34  
35  
36  
37  
38  
39  
40  
41  
42  
43  
44  
45  
46  
47  
48  
49  
50  
51  
52  
53  
54  
55  
56  
57  
58  
59  
60

For peer review only

1  
2  
3  
4  
5  
6  
7  
8  
9  
10  
11  
12  
13  
14  
15  
16  
17  
18  
19  
20  
21  
22  
23  
24  
25  
26  
27  
28  
29  
30  
31  
32  
33  
34  
35  
36  
37  
38  
39  
40  
41  
42  
43  
44  
45  
46  
47  
48  
49  
50  
51  
52  
53  
54  
55  
56  
57  
58  
59  
60

For peer review only

is

1  
2  
3  
4  
5  
6  
7  
8  
9  
10  
11  
12  
13  
14  
15  
16  
17  
18  
19  
20  
21  
22  
23  
24  
25  
26  
27  
28  
29  
30  
31  
32  
33  
34  
35  
36  
37  
38  
39  
40  
41  
42  
43  
44  
45  
46  
47  
48  
49  
50  
51  
52  
53  
54  
55  
56  
57  
58  
59  
60

For peer review only

|    |             |                                 |
|----|-------------|---------------------------------|
| 1  |             |                                 |
| 2  | ICD-10 code | Term                            |
| 3  | N18.5       | Chronic kidney disease stage IV |
| 4  | N18.9       | Chronic kidney disease stage V  |
| 5  |             |                                 |
| 6  |             |                                 |
| 7  |             |                                 |
| 8  |             |                                 |
| 9  |             |                                 |
| 10 |             |                                 |
| 11 |             |                                 |
| 12 |             |                                 |
| 13 |             |                                 |
| 14 |             |                                 |
| 15 |             |                                 |
| 16 |             |                                 |
| 17 |             |                                 |
| 18 |             |                                 |
| 19 |             |                                 |
| 20 |             |                                 |
| 21 |             |                                 |
| 22 |             |                                 |
| 23 |             |                                 |
| 24 |             |                                 |
| 25 |             |                                 |
| 26 |             |                                 |
| 27 |             |                                 |
| 28 |             |                                 |
| 29 |             |                                 |
| 30 |             |                                 |
| 31 |             |                                 |
| 32 |             |                                 |
| 33 |             |                                 |
| 34 |             |                                 |
| 35 |             |                                 |
| 36 |             |                                 |
| 37 |             |                                 |
| 38 |             |                                 |
| 39 |             |                                 |
| 40 |             |                                 |
| 41 |             |                                 |
| 42 |             |                                 |
| 43 |             |                                 |
| 44 |             |                                 |
| 45 |             |                                 |
| 46 |             |                                 |
| 47 |             |                                 |
| 48 |             |                                 |
| 49 |             |                                 |
| 50 |             |                                 |
| 51 |             |                                 |
| 52 |             |                                 |
| 53 |             |                                 |
| 54 |             |                                 |
| 55 |             |                                 |
| 56 |             |                                 |
| 57 |             |                                 |
| 58 |             |                                 |
| 59 |             |                                 |
| 60 |             |                                 |

For peer review only

| 1  | Medcodeid        | Term                                                                 |
|----|------------------|----------------------------------------------------------------------|
| 2  | 451442010        | Oesophageal varices in cirrhosis of the liver                        |
| 3  | 453265010        | Oesophageal varices in alcoholic cirrhosis of the liver              |
| 4  | 5992721000006114 | Esophageal varices in alcoholic cirrhosis of the liver               |
| 5  | 5975531000006117 | Esophageal varices in cirrhosis of the liver                         |
| 6  | 126721013        | Florid cirrhosis                                                     |
| 7  | 303425016        | Capsular portal cirrhosis                                            |
| 8  | 396392016        | Juvenile portal cirrhosis                                            |
| 9  | 451442010        | Oesophageal varices in cirrhosis of the liver                        |
| 10 | 493707012        | Hypertrophic portal cirrhosis                                        |
| 11 | 2576980018       | Portal cirrhosis                                                     |
| 12 | 1736361000000112 | Cystic fibrosis related cirrhosis                                    |
| 13 | 123999018        | Congestive cirrhosis                                                 |
| 14 | 396393014        | Non-alcoholic cirrhosis NOS                                          |
| 15 | 55851000006118   | Xanthomatous portal cirrhosis                                        |
| 16 | 2598551000006118 | ICC - Indian childhood cirrhosis                                     |
| 17 | 8242561000006112 | Cirrhosis associated with cystic fibrosis                            |
| 18 | 3713571000006114 | Congestive cirrhosis                                                 |
| 19 | 5524681000006114 | Cirrhosis secondary to cholestasis                                   |
| 20 | 6941931000006112 | Laennec's cirrhosis                                                  |
| 21 | 5493051000006111 | Cirrhosis of liver not due to alcohol                                |
| 22 | 4353661000006114 | Cholangiolitic cirrhosis                                             |
| 23 | 7875311000006114 | Cirrhosis of liver caused by methyldopa                              |
| 24 | 7518231000006111 | NAIC - North American Indian childhood cirrhosis                     |
| 25 | 7738891000006115 | Idiopathic copper associated cirrhosis of liver                      |
| 26 | 2754821000006111 | Syphilitic cirrhosis                                                 |
| 27 | 7559281000006114 | HMDPC - hypermanganesemia with dystonia, polycythaemia and cirrhosis |
| 28 | 2847631000006117 | Micronodular cirrhosis                                               |
| 29 | 3515305014       | Cirrhosis of liver with primary sclerosing cholangitis               |
| 30 | 3905811000006110 | Postnecrotic cirrhosis                                               |
| 31 | 7868601000006115 | Cardiomyopathy co-occurrent and due to cirrhosis of liver            |
| 32 | 7875301000006111 | Cirrhosis of liver caused by amiodarone                              |
| 33 | 7966981000006110 | Cirrhosis of liver due to chronic hepatitis C                        |
| 34 | 8032261000006117 | Cirrhosis of liver due to hepatitis B                                |
| 35 | 6349661000006117 | Early cirrhosis                                                      |
| 36 | 7043971000006117 | Drug-induced cirrhosis of liver                                      |
| 37 | 7559271000006111 | HMDPC - hypermanganesemia with dystonia, polycythemia and cirrhosis  |
| 38 | 7875291000006110 | Cirrhosis of liver caused by methotrexate                            |
| 39 | 3772081000006115 | Pigment cirrhosis                                                    |
| 40 | 7043981000006119 | Drug-induced hepatic cirrhosis                                       |
| 41 | 6617771000006112 | Bronze cirrhosis                                                     |
| 42 | 5992721000006114 | Esophageal varices in alcoholic cirrhosis of the liver               |
| 43 | 3010831000006117 | Hanot's cirrhosis                                                    |
| 44 | 3713561000006119 | Cardiac cirrhosis                                                    |
| 45 | 476611000006116  | Alcoholic cirrhosis of liver                                         |
| 46 | 2579818016       | Laennec's cirrhosis                                                  |
| 47 | 303438012        | Cardituberculous cirrhosis                                           |
| 48 | 303781011        | [X]Other and unspecified cirrhosis of liver                          |
| 49 | 906081000006114  | [RFC] Cirrhosis                                                      |
| 50 | 353621011        | Laennec's cirrhosis, non-alcoholic                                   |

|    |                  |                                                              |
|----|------------------|--------------------------------------------------------------|
| 1  |                  |                                                              |
| 2  | 453265010        | Oesophageal varices in alcoholic cirrhosis of the liver      |
| 3  | 303393017        | Cirrhosis and chronic liver disease                          |
| 4  | 303414013        | Unilobular portal cirrhosis                                  |
| 5  | 11267010         | Indian childhood cirrhosis                                   |
| 6  | 7743871000006114 | Decompensated cirrhosis of liver                             |
| 7  | 4355091000006112 | Latent cirrhosis                                             |
| 8  | 4353651000006112 | Nutritional cirrhosis                                        |
| 9  | 2598561000006116 | Cirrhosis-familial with pulmonary hypertension               |
| 10 | 2816681000006110 | CL - Cirrhosis of liver                                      |
| 11 | 6947471000006110 | Alcoholic liver cirrhosis                                    |
| 12 | 3206871000006111 | Macronodular cirrhosis                                       |
| 13 | 226161000006113  | Pipe-stem portal cirrhosis                                   |
| 14 | 303442010        | Portal cirrhosis unspecified                                 |
| 15 | 303439016        | Syphilitic portal cirrhosis                                  |
| 16 | 303518014        | Toxic liver disease with fibrosis and cirrhosis of liver     |
| 17 | 396390012        | Multilobular portal cirrhosis                                |
| 18 | 7743881000006112 | Decompensated cirrhosis                                      |
| 19 | 5087011000006114 | Hypoxia-associated cirrhosis                                 |
| 20 | 603321000006118  | Cryptogenic cirrhosis                                        |
| 21 | 2935051000006118 | Posthepatic cirrhosis                                        |
| 22 | 2507081000006119 | Glissonian cirrhosis                                         |
| 23 | 6883751000006115 | Vandellia cirrhosa                                           |
| 24 | 3206891000006112 | PNC - Postnecrotic cirrhosis                                 |
| 25 | 2816671000006112 | Hepatic cirrhosis                                            |
| 26 | 5086991000006115 | Laennec cirrhosis, non-alcoholic                             |
| 27 | 4787221000006115 | Pipestem portal cirrhosis                                    |
| 28 | 4787261000006114 | Zooparasitic portal cirrhosis                                |
| 29 | 550431000006116  | Childhood function cirrhosis                                 |
| 30 | 731231000006114  | Macronodular cirrhosis of liver                              |
| 31 | 803961000006119  | Glycogenosis with hepatic cirrhosis                          |
| 32 | 1786709019       | Pigmentary cirrhosis of liver                                |
| 33 | 303419015        | Diffuse nodular cirrhosis                                    |
| 34 | 303420014        | Fatty portal cirrhosis                                       |
| 35 | 303433015        | Pigmentary portal cirrhosis                                  |
| 36 | 303458013        | Portal fibrosis without cirrhosis                            |
| 37 | 7518221000006113 | North American Indian childhood cirrhosis                    |
| 38 | 5152271000006110 | Clay pipe-stem cirrhosis                                     |
| 39 | 221111000000114  | Cirrhosis - non-alcoholic                                    |
| 40 | 353613017        | Cirrhosis of liver                                           |
| 41 | 7559261000006116 | Hypermanganesemia with dystonia, polycythemia, and cirrhosis |
| 42 | 6941941000006119 | PC - Portal cirrhosis                                        |
| 43 | 2824431000006111 | Progressive neuronal degeneration with liver cirrhosis       |
| 44 | 3206901000006111 | Multilobar cirrhosis                                         |
| 45 | 6947461000006115 | Alcoholic cirrhosis                                          |
| 46 | 2526441000006114 | Cholangitic cirrhosis                                        |
| 47 | 5975531000006117 | Esophageal varices in cirrhosis of the liver                 |
| 48 | 2753761000006112 | Mixed micro AND macronodular cirrhosis                       |
| 49 | 6617781000006110 | Bronzed cirrhosis                                            |
| 50 | 211821000006111  | Postnecrotic cirrhosis of liver                              |
| 51 | 477604016        | Mixed portal cirrhosis                                       |

|    |                  |                                                                           |
|----|------------------|---------------------------------------------------------------------------|
| 1  |                  |                                                                           |
| 2  | 303435010        | Toxic portal cirrhosis                                                    |
| 3  | 3033421000006115 | Parasitic cirrhosis                                                       |
| 4  | 8458711000006115 | Ascites due to alcoholic cirrhosis                                        |
| 5  | 4353641000006110 | Toxic cirrhosis                                                           |
| 6  | 4403611000006113 | Acquired portal-systemic shunt due to cirrhosis                           |
| 7  |                  |                                                                           |
| 8  | 3515307018       | Cirrhosis of liver co-occurrent and due to primary sclerosing cholangitis |
| 9  | 4355101000006118 | Advanced cirrhosis                                                        |
| 10 | 2526451000006111 | Cholestatic cirrhosis                                                     |
| 11 | 5493041000006114 | Cirrhosis, nonalcoholic                                                   |
| 12 |                  |                                                                           |
| 13 | 1763641000006113 | Cirrhosis of liver due to cystic fibrosis                                 |
| 14 | 303437019        | Bacterial portal cirrhosis                                                |
| 15 | 303440019        | Zooparasitic portal cirrhosis                                             |
| 16 | 7559251000006118 | Hypermanganesemia with dystonia, polycythaemia, and cirrhosis             |
| 17 | 303441015        | Infectious cirrhosis                                                      |
| 18 |                  |                                                                           |
| 19 |                  |                                                                           |
| 20 |                  |                                                                           |
| 21 |                  |                                                                           |
| 22 |                  |                                                                           |
| 23 |                  |                                                                           |
| 24 |                  |                                                                           |
| 25 |                  |                                                                           |
| 26 |                  |                                                                           |
| 27 |                  |                                                                           |
| 28 |                  |                                                                           |
| 29 |                  |                                                                           |
| 30 |                  |                                                                           |
| 31 |                  |                                                                           |
| 32 |                  |                                                                           |
| 33 |                  |                                                                           |
| 34 |                  |                                                                           |
| 35 |                  |                                                                           |
| 36 |                  |                                                                           |
| 37 |                  |                                                                           |
| 38 |                  |                                                                           |
| 39 |                  |                                                                           |
| 40 |                  |                                                                           |
| 41 |                  |                                                                           |
| 42 |                  |                                                                           |
| 43 |                  |                                                                           |
| 44 |                  |                                                                           |
| 45 |                  |                                                                           |
| 46 |                  |                                                                           |
| 47 |                  |                                                                           |
| 48 |                  |                                                                           |
| 49 |                  |                                                                           |
| 50 |                  |                                                                           |
| 51 |                  |                                                                           |
| 52 |                  |                                                                           |
| 53 |                  |                                                                           |
| 54 |                  |                                                                           |
| 55 |                  |                                                                           |
| 56 |                  |                                                                           |
| 57 |                  |                                                                           |
| 58 |                  |                                                                           |
| 59 |                  |                                                                           |
| 60 |                  |                                                                           |



|    | ICD-10 code | Term                                     |
|----|-------------|------------------------------------------|
| 1  |             |                                          |
| 2  |             |                                          |
| 3  | K74.1       | Hepatic sclerosis                        |
| 4  | K74.2       | Hepatic fibrosis with hepatic sclerosis  |
| 5  | K74.3       | Primary biliary cirrhosis                |
| 6  | K74.4       | Secondary biliary cirrhosis              |
| 7  | K74.5       | Biliary cirrhosis, unspecified           |
| 8  | K74.6       | Other and unspecified cirrhosis of liver |
| 9  | K74.60      | Unspecified cirrhosis of liver           |
| 10 | K74.69      | Other cirrhosis of liver                 |
| 11 |             |                                          |
| 12 |             |                                          |
| 13 |             |                                          |
| 14 |             |                                          |
| 15 |             |                                          |
| 16 |             |                                          |
| 17 |             |                                          |
| 18 |             |                                          |
| 19 |             |                                          |
| 20 |             |                                          |
| 21 |             |                                          |
| 22 |             |                                          |
| 23 |             |                                          |
| 24 |             |                                          |
| 25 |             |                                          |
| 26 |             |                                          |
| 27 |             |                                          |
| 28 |             |                                          |
| 29 |             |                                          |
| 30 |             |                                          |
| 31 |             |                                          |
| 32 |             |                                          |
| 33 |             |                                          |
| 34 |             |                                          |
| 35 |             |                                          |
| 36 |             |                                          |
| 37 |             |                                          |
| 38 |             |                                          |
| 39 |             |                                          |
| 40 |             |                                          |
| 41 |             |                                          |
| 42 |             |                                          |
| 43 |             |                                          |
| 44 |             |                                          |
| 45 |             |                                          |
| 46 |             |                                          |
| 47 |             |                                          |
| 48 |             |                                          |
| 49 |             |                                          |
| 50 |             |                                          |
| 51 |             |                                          |
| 52 |             |                                          |
| 53 |             |                                          |
| 54 |             |                                          |
| 55 |             |                                          |
| 56 |             |                                          |
| 57 |             |                                          |
| 58 |             |                                          |
| 59 |             |                                          |
| 60 |             |                                          |

For peer review only

1  
2 Medcodeid  
3 103777013  
4 117168016  
5 270232016  
6 270616014  
7 272325018  
8 272389014  
9 324973015  
10 324974014  
11 324975010  
12 348547019  
13 348550016  
14 354610013  
15 354613010  
16 354616019  
17 354621016  
18 354628010  
19 413415016  
20 474471011  
21 855601000006117  
22 864761000006115  
23 988961000006115  
24 1711491000006119  
25 1711511000006113  
26 2189151000000117  
27 2191221000000118  
28 2197961000000113  
29 1620531000006113  
30 270768010  
31 270777015  
32 272326017  
33 272327014  
34 31211000006119  
35 177251000006119  
36 225661000006111  
37 380061000000118  
38 478131000006115  
39 1905531000006112  
40 859491000006112  
41 900121000006113  
42 1227663018  
43 3527364013  
44 3647071000006110  
45 5039311000006114  
46 5096171000006118  
47 4542501000006119  
48 3532180010  
49 4663311000006116  
50 2786011000006112  
51 5340221000006117

For peer review only

1 4669451000006113  
2 3647061000006115  
3 12458801000006116  
4 4542461000006119  
5 4542691000006113  
6 3022121000006117  
7 7688001000006116  
8 4668981000006117  
9 2786021000006116  
10 3647051000006117  
11 4663811000006112  
12 3930661000006110  
13 4410641000006115  
14 4668961000006110  
15 7104131000006119  
16 5039331000006115  
17 2786001000006114  
18 4661791000006112  
19 4663791000006113  
20 864951000006119  
21 2560511000006119  
22 3786771000006114  
23 7237331000006116  
24 7237321000006119  
25 7316561000006118  
26 2618391000006114  
27 9935651000006116  
28 7279701000006119  
29 3346301000006113  
30 6948351000006111  
31 7838631000006116  
32 8030371000006119  
33 8453111000006110  
34 11910651000006112  
35 3653831000006114  
36 5161091000006119  
37 5096231000006110  
38 7237731000006117  
39 7139341000006119  
40 7254711000006117  
41 7985891000006113  
42 2666681000006118  
43 5087211000006119  
44 7791461000006114  
45 5057551000006110  
46 7351231000006114  
47 2641011000006119  
48 2641021000006110  
49 7766401000006118  
50 5039351000006110

For peer review only

1 6018741000006111  
2 7385581000006116  
3 3636952011  
4 7710041000006114  
5 7475631000006115  
6 7986241000006112  
7 7150611000006118  
8 7566431000006113  
9 8335521000006117  
10 7791471000006119  
11 8453081000006116  
12 7100591000006115  
13 7710031000006116  
14 5039341000006113  
15 5157601000006116  
16 3534658012  
17 5039371000006117  
18 7170221000006110  
19 7838621000006119  
20 7566411000006119  
21 8115451000006112  
22 2868911000006114  
23 3598901000006118  
24 3786781000006112  
25 5959291000006115  
26 7383621000006115  
27 6932441000006115  
28 7507901000006114  
29 8268201000006117  
30 3527360016  
31 3033691000006115  
32 3670311000006119  
33 3915911000006117  
34 5096031000006117  
35 7785581000006115  
36 7507891000006110  
37 7838611000006110  
38 7566391000006119  
39 2949531000006115  
40 6948341000006114  
41 7189591000006110  
42 8325471000006118  
43 12458821000006114  
44 8117811000006119  
45 8348931000006116  
46 2447021000000110  
47 5087221000006110  
48 5057581000006119  
49 5096241000006117  
50 7103511000006119

For peer review only

1  
2 7184551000006117  
3 2660021000006113  
4 5039361000006112  
5 5096051000006112  
6 3527362012  
7  
8 8453711000006114  
9 12019461000006111  
10 7133421000006117  
11 3534651018  
12 4218231000006113  
13 4745181000006113  
14 5057571000006117  
15 7150631000006112  
16 7791441000006110  
17 8293001000006116  
18 7080931000006116  
19 7148541000006115  
20 2666671000006116  
21 3653841000006116  
22 90511000006115  
23 1549841000006116  
24 460649019  
25 461518012  
26 7986201000006110  
27 7752391000006113  
28 4323211000006112  
29 8325851000006114  
30 4319871000006111  
31 8325771000006113  
32 2868901000006111  
33 5161121000006115  
34 2660011000006117  
35 12031651000006118  
36 8284621000006118  
37 3825411000006114  
38 7475621000006118  
39 8450901000006118  
40 6718281000006112  
41 3973131000006117  
42 4779991000006112  
43 7714921000006112  
44 7181301000006112  
45 5057561000006112  
46 5161131000006117  
47 3825401000006111  
48 5980831000006116  
49 7385571000006119  
50 7298951000006115  
51 8313221000006113  
52 8325881000006118

For peer review only

1 3455171000006118  
2 460955014  
3 4663831000006118  
4 4661761000006116  
5 7688541000006114  
6 460645013  
7 754061000006111  
8 460643018  
9 1227661016  
10 384481000006118  
11 42151000006116  
12 270234015  
13 270618010  
14 1713291000006119  
15 1713331000006114  
16 2676200013  
17 354623018  
18 354627017  
19 422992018  
20 324971018  
21 270615013  
22 501594013  
23 7150641000006119  
24 8321131000006112  
25 7767241000006119  
26 7786611000006116  
27 5161291000006110  
28 5059341000006114  
29 7167121000006113  
30 7212371000006110  
31 7167141000006118  
32 7190521000006119  
33 7688081000006113  
34 5056471000006118  
35 11910741000006116  
36 380101000000116  
37 822591000006117  
38 6932431000006113  
39 8321141000006119  
40 7613121000006116  
41 12019471000006116  
42 6024591000006114  
43 5094171000006114  
44 7150621000006114  
45 8327141000006110  
46 7351241000006116  
47 5340201000006110  
48 3534653015  
49 933321000006111  
50 5096191000006117

For peer review only

1  
2 4410651000006118  
3 4663841000006111  
4 3023061000006115  
5 3023081000006113  
6 5486891000006118  
7  
8 460650019  
9 42161000006119  
10 268099017  
11 268100013  
12  
13 270767017  
14 2209021000000112  
15 2234621000000111  
16 7766381000006118  
17 354612017  
18 270621012  
19  
20 30458014  
21 2160027017  
22 403103015  
23 7484221000006112  
24 3973121000006115  
25 5161281000006112  
26 7150601000006116  
27 4319661000006117  
28 6585661000006112  
29 7767231000006112  
30 362091000000110  
31 460651015  
32 3636384014  
33 2890701000006112  
34 8325791000006114  
35 6933861000006111  
36 4319821000006110  
37 6316361000006112  
38 7167181000006112  
39 5053751000006110  
40 7566421000006110  
41 7767221000006114  
42 7565141000006116  
43 8348921000006119  
44 7167131000006111  
45 7569841000006114  
46 7238481000006111  
47 7710051000006111  
48 5599451000006111  
49 7385561000006114  
50 4661751000006118  
51 4668951000006113  
52 4669011000006116  
53 7080381000006116  
54 6933851000006114  
55  
56  
57  
58  
59  
60

For peer review only

1 4668971000006115  
2 3485411000006113  
3 3022131000006119  
4 424791000006110  
5 500371000006119  
6 500401000006116  
7 1550021000006110  
8 324977019  
9 55971000006117  
10 90461000006118  
11 270233014  
12 2209101000000119  
13 2234541000000115  
14 906351000006116  
15 272320011  
16 354617011  
17 8335251000006112  
18 2560521000006110  
19 5096271000006113  
20 7168651000006111  
21 7171231000006119  
22 8284921000006111  
23 7279711000006116  
24 7985971000006118  
25 5647621000006110  
26 177341000006111  
27 7791451000006112  
28 8115511000006112  
29 8325761000006118  
30 8325871000006116  
31 5096281000006111  
32 3455181000006115  
33 8325481000006115  
34 8451601000006117  
35 5538541000006110  
36 12458511000006115  
37 5647611000006119  
38 7254721000006113  
39 460644012  
40 4323341000006116  
41 90471000006113  
42 372621000000114  
43 7496071000006114  
44 7139351000006117  
45 7214301000006113  
46 12719481000006116  
47 4542701000006113  
48 3647031000006112  
49 5043991000006117  
50 4663821000006116

For peer review only



1  
2 5043981000006115  
3 4669051000006115  
4 8258171000006110  
5 3022141000006112  
6 7688041000006119  
7 3022111000006113  
8 7091541000006113  
9 478111000006114  
10 818821000006110  
11 376141000000113  
12 90421000006112  
13 2198001000000111  
14 2198141000000110  
15 1800881000000119  
16 1709421000006118  
17 864281000006116  
18 225671000006116  
19 2160021016  
20 73655011  
21 270612011  
22 270614012  
23 270766014  
24 324970017  
25 324976011  
26 353974015  
27 354624012  
28 354631011  
29 3790671000006119  
30 2626431000006112  
31 7090481000006112  
32 12031641000006115  
33 5980821000006119  
34 7132471000006114  
35 7766371000006116  
36 11909781000006115  
37 11913051000006114  
38 2937111000006111  
39 3915921000006113  
40 7238471000006113  
41 8090361000006115  
42 5593651000006110  
43 3516351000006115  
44 7791431000006117  
45 8325861000006111  
46 3737491000006113  
47 8325781000006111  
48 7209391000006119  
49 3534659016  
50 2743241000000110  
51 8325891000006115

For peer review only

1  
2 5161081000006117  
3 3260851000006117  
4 11913041000006112  
5 8335261000006114  
6 7133411000006113  
7 7348311000006117  
8 7766391000006115  
9 7080921000006119  
10 5044001000006114  
11 5157591000006112  
12 7569831000006116  
13 7932051000006112  
14 3292751000006114  
15 12719251000006111  
16 90611000006119  
17 399381000000115  
18 3022151000006114  
19 3515071000006117  
20 4663371000006113  
21 3647021000006114  
22 8325571000006119  
23 3023071000006110  
24 3532181014  
25 5096211000006116  
26 4661781000006114  
27 7104121000006117  
28 739931000006118  
29 270617017  
30 270770018  
31 270776012  
32 270778013  
33 1834341000006111  
34 861571000006118  
35 366671000000118  
36 282927013  
37 354615015  
38 354618018  
39 354619014  
40 7212381000006113  
41 8293011000006118  
42 8321121000006114  
43 7986531000006116  
44 5087201000006117  
45 270769019  
46 4542541000006117  
47 251924010  
48 4542681000006110  
49 251930010  
50 251923016  
51 4542521000006112  
52  
53  
54  
55  
56  
57  
58  
59  
60

For peer review only

1  
2 251929017  
3 4542661000006117  
4  
5  
6  
7  
8  
9  
10  
11  
12  
13  
14  
15  
16  
17  
18  
19  
20  
21  
22  
23  
24  
25  
26  
27  
28  
29  
30  
31  
32  
33  
34  
35  
36  
37  
38  
39  
40  
41  
42  
43  
44  
45  
46  
47  
48  
49  
50  
51  
52  
53  
54  
55  
56  
57  
58  
59  
60

For peer review only

1 Term  
2  
3 Transplantation of pancreas  
4 Renal transplant  
5 Replacement of previous liver transplant  
6 Renewal of transplanted pancreatic tissue  
7 Cadaveric renal transplant  
8 Exploration of renal transplant  
9 Kidney transplant failure and rejection  
10 Heart transplant failure and rejection  
11 Heart-lung transplant failure and rejection  
12 Single lung transplant  
13 Double lung transplant  
14 Renal transplant rejection  
15 Very mild acute rejection of renal transplant  
16 Acute rejection of renal transplant - grade I  
17 Chronic transplant nephropathy  
18 Acute-on-chronic rejection of renal transplant  
19 Unexplained episode of renal transplant dysfunction  
20 Transplantation of islets of Langerhans  
21 Transplant biopsy  
22 Pancreas transplant  
23 Renal transplant rejected  
24 Post-transplant bronchiolitis obliterans syndrome  
25 Lung transplant evaluation  
26 Urological complication of renal transplant  
27 Vascular complication of renal transplant  
28 Rupture of artery of transplanted kidney  
29 Paediatric transplantation surgery  
30 Transplantation of heart and lung NOS  
31 Other specified other transplantation of heart  
32 Other specified transplantation of kidney  
33 Transplantation of kidney NOS  
34 Orthotopic transplantation of liver  
35 Renal transplant with complication  
36 Piggy back liver transplant  
37 Interventions associated with transplantation of kidney NOS  
38 Allotransplantation of kidney from cadaver  
39 Excision of rejected transplanted kidney  
40 Corneal transplant  
41 Renal transplant rejected  
42 [V]Pancreas transplanted  
43 Transplanted liver present  
44 Tx - Kidney transplantation  
45 SLTx - Single lung transplant  
46 Mild chronic transplant nephropathy  
47 History of renal transplant  
48 Liver transplant recipient  
49 Whole organ pancreatic transplant  
50 Hepatic transplantation  
51 PTLD - Post-transplant lymphoproliferative disorder  
52  
53  
54  
55  
56  
57  
58  
59  
60

1 Exploration of kidney transplant  
2 Kidney transplant  
3 [V]Liver transplanted  
4 History of organ transplant  
5 History of being lung transplant recipient  
6 Heart transplant  
7 Allotransplantation of kidney with DBD (donation after brain stem death)  
8 Renal autotransplantation or reimplantation of kidney  
9 LTx - Liver transplant  
10 Tx - Renal transplantation  
11 Xenotransplant of heart  
12 Transplant of lung  
13 Islet cell transplant  
14 Autotransplant kidney  
15 Disorder affecting transplant  
16 DLTx - Double lung transplant  
17 Tx - Liver transplantation  
18 Piggy-back liver transplant  
19 Allotransplant of heart and lung  
20 Heart transplant  
21 Structure of transplanted liver  
22 Anaesthesia for corneal transplant  
23 MR angiography of transplanted kidney  
24 Magnetic resonance angiography of transplanted kidney  
25 Monomorphic posttransplant lymphoproliferative disorder  
26 Immunosuppressive therapy for transplant  
27 Awaiting transplantation of lung  
28 Radionuclide imaging of transplanted kidney  
29 Renal homotransplantation excluding donor and recipient nephrectomy  
30 Renal transplant venogram  
31 Infectious mononucleosis-like post-transplant lymphoproliferative disorder  
32 Aftercare for liver transplant done  
33 Emergency hospital admission to cardiothoracic transplantation surgery service  
34 [V]Kidney transplanted  
35 Structure of transplanted kidney  
36 Ultrasound scan of transplant liver  
37 Failed renal transplant  
38 Specimen from transplanted lung obtained by excision  
39 Rejection of pancreas transplant  
40 Percutaneous transhepatic transplantation of pancreatic islet cell using fluoroscopic guidance  
41 Transplantation of kidney and pancreas  
42 Transplanted cornea  
43 Liver transplant rejection  
44 Entire transplanted pancreatic islets  
45 Cardiac transplant disorder  
46 Fluoroscopic venography of transplanted pancreas using contrast  
47 Anaesthesia for heart/lung transplant  
48 Anesthesia for heart/lung transplant  
49 Retrograde insertion of ureteric stent into ureter of transplanted kidney using fluoroscopic guidance  
50 Double lung transplant en bloc

1 Lung transplant rejection  
2 Post transplant lymphoproliferative disorder  
3 Bronchiolitis obliterans syndrome due to and after lung transplantation  
4 Transplant renal artery stenosis  
5 Disorder of heart muscle associated with rejection of cardiac transplant  
6 Laparoscopic biopsy of transplanted pancreas  
7 Doppler ultrasonography (US) of transplanted kidney  
8 Liver transplant recipient  
9 History of heart-lung transplant recipient  
10 Entire transplanted islets of Langerhans  
11 Emergency hospital admission to transplantation surgery service  
12 Disorder of transplanted heart  
13 Structure of renal artery of transplanted kidney  
14 Double lung transplant as a block  
15 Renal transplant venogram  
16 Transplanted heart-lung present  
17 BSSLTx - Bilateral sequential single lung transplant  
18 Chronic rejection of liver transplant  
19 Reactive plasmacytic hyperplasia post-transplant lymphoproliferative disorder  
20 Lung transplant recipient  
21 Transplanted lung resection sample  
22 Anesthesia for renal transplant  
23 Heterotransplant of pancreas  
24 Anesthesia for corneal transplant  
25 Discharge from transplant surgery service  
26 Revision of transplantation of heart  
27 Renal transplant angiogram  
28 History of pancreas transplant  
29 Allotransplantation of lobe of lung from live donor  
30 Transplanted kidney present  
31 Complication of transplanted liver  
32 Homotransplant of pancreas  
33 Anaesthesia for heart transplant  
34 Primary non-function of renal transplant  
35 Kidney transplant recipient  
36 History of transplantation of pancreas  
37 Early post-transplant lymphoproliferative disorder  
38 Cornea transplant recipient  
39 Liver transplant without recipient hepatectomy  
40 Fluoroscopic venography of renal transplant  
41 Hyperacute rejection of pancreas transplant  
42 Fluoroscopic angiography of transplanted liver  
43 [V]Lung transplanted  
44 Renal transplant recipient  
45 Fluoroscopy guided retrograde insertion of stent into ureter of transplanted kidney  
46 Cardiothoracic transplantation care plan  
47 Liver transplant failure  
48 Cardiac transplant failure  
49 Perfusion injury of renal transplant  
50 Disorder related to renal transplantation

1 Accelerated rejection of pancreas transplant  
2 Transplanted lung  
3 Bilateral sequential single lung transplant  
4 Hyperacute rejection of renal transplant  
5 Transplanted lung present  
6 Emergency hospital admission to paediatric transplantation surgery service  
7 Fluoroscopy guided removal of nephrostomy tube from transplanted kidney  
8 Acute rejection of lung transplant  
9 Heart transplant recipient  
10 Kidney transplant evaluation  
11 Entire transplanted lung  
12 Cardiac transplant rejection  
13 Doppler ultrasound scan of transplanted kidney  
14 Structure of transplanted islets of Langerhans  
15 Living donor liver transplantation  
16 Disorder related to lung transplantation  
17 Chronic rejection of cardiac transplant  
18 Structure of transplanted cornea  
19 Transplanted kidney  
20 LTx - Lung transplant  
21 Allotransplantation of kidney from non-beating heart cadaver  
22 Transplanted cornea present  
23 Transplant present  
24 Percutaneous needle biopsy of transplanted pancreas  
25 Heart-lung transplant recipient  
26 Spinal cord transplantation  
27 CT of transplanted liver  
28 Cardiovascular system transplantation  
29 Ultrasound guided biopsy of transplanted liver  
30 Anaesthesia for renal transplant  
31 US scan of transplant pancreas  
32 Structure of transplanted lung  
33 Allotransplantation of right kidney  
34 Allogeneic transplantation of pancreatic islet cells  
35 Transplanted heart  
36 Disorder of myocardium associated with rejection of cardiac transplant  
37 Pretransplant evaluation of liver recipient  
38 Autotransplantation of heart  
39 Anesthesia for liver transplant  
40 Entire transplanted heart  
41 Chronic kidney disease stage 5 with transplant  
42 Acute rejection of pancreas transplant  
43 Complication of transplanted heart  
44 Ultrasound scan of transplant pancreas  
45 Structure of transplanted heart  
46 Heart transplant biopsy  
47 Post transplant lymphoproliferative disorder  
48 Arteriosclerosis of coronary artery bypass graft of transplanted heart  
49 Cardiothoracic transplantation service  
50 Fluoroscopy guided percutaneous transjugular biopsy of transplanted liver

1 Disorder of transplanted kidney  
2 [V]Heart and lungs transplant status  
3 Auxiliary heart transplant  
4 Orthotopic transplantation of liver  
5 Transplantation of kidney regime  
6 [V]Heart transplanted  
7 Kidney transplant with complication  
8 [V]Transplanted organ or tissue  
9 [V]Transplanted organ  
10 [X]Failure & rejection of other transplanted organ & tissue  
11 Organ transplant with complication  
12 Transplantation of liver NOS  
13 Transplantation of pancreas NOS  
14 Cardiothoracic transplantation  
15 Transplantation surgery  
16 Orthotopic transplantation of whole liver  
17 Chronic rejection of renal transplant - grade 1  
18 Chronic rejection of renal transplant - grade III  
19 Excision of rejected transplanted kidney  
20 Transplanted organ rejection  
21 Transplantation of tail of pancreas  
22 Transplantation of kidney  
23 Doppler ultrasound of transplanted kidney  
24 Ultrasound guided insertion of nephrostomy tube into transplanted kidney  
25 Doppler ultrasound of transplanted liver  
26 Structure of transplanted pancreas  
27 Ultrasound scan of transplant kidney  
28 Transplant renal vein thrombosis  
29 Hyperacute rejection of liver transplant  
30 Specimen from transplanted kidney obtained by biopsy  
31 Hyperacute rejection of lung transplant  
32 Chronic rejection of pancreas transplant  
33 Doppler ultrasonography of blood vessel of organ transplant  
34 Accelerated coronary artery disease in transplanted heart  
35 [V]Liver transplanted  
36 Examination of recipient after kidney transplant  
37 Heterotopic liver transplant  
38 Fluoroscopic angiography of renal transplant  
39 Fluoroscopy guided insertion of nephrostomy tube into transplanted kidney  
40 Recurrent post-transplant renal disease  
41 Removal of nephrostomy tube from transplanted kidney using fluoroscopic guidance  
42 Solid organ transplant  
43 End stage renal failure with renal transplant  
44 Doppler ultrasonography of transplanted kidney  
45 Radioisotope hepatobiliary function study with stimulation post transplant  
46 Fluoroscopic venogram of transplanted pancreas using contrast  
47 Post-transplant neoplasia  
48 Transplanted heart present  
49 Corneal transplant  
50 Moderate chronic transplant nephropathy



1  
2 Transplantation of islet cells  
3 Piggy-back heart transplant  
4 Heart-lung transplant with recipient cardiectomy-pneumonectomy  
5 Heart and lung transplant  
6 Removal of transplanted kidney  
7 [V]Lung transplanted  
8 Organ transplant with complication  
9 Other specified transplantation of lung  
10 Transplantation of lung NOS  
11 Other specified transplantation of heart and lung  
12 Aneurysm of vein of transplanted kidney  
13 Thrombosis of vein of transplanted kidney  
14 Antegrade insertion of ureteric stent into ureter of transplanted kidney using fluoroscopic guidance  
15 Accelerated rejection of renal transplant  
16 Excision of transplanted pancreas  
17 Transplantation of liver  
18 Transplantation surgery  
19 Transplanted organ failure  
20 Normal renal function of transplanted kidney  
21 Anaesthesia for liver transplant  
22 US scan of transplant kidney  
23 US doppler scan of transplanted kidney  
24 Bronchus transplantation  
25 Post-transplant lymphoproliferative disorder  
26 Doppler ultrasound scan of transplanted liver  
27 Transplantation of single lobe of lung  
28 Transplanted liver present  
29 Polymorphic lymphoproliferative disorder following transplant  
30 Transplanted organ  
31 MRI angiogram of transplanted liver  
32 Fluoroscopy and angioplasty of renal transplant  
33 Pleura transplantation  
34 Entire transplanted cornea  
35 Accelerated rejection of liver transplant  
36 Post-lung transplantation bronchiectasis  
37 Heart transplant recipient  
38 Doppler ultrasonography of transplanted liver  
39 Doppler ultrasound of transplant liver  
40 Fluoroscopy guided antegrade insertion of stent into ureter of transplanted kidney  
41 Hyperacute rejection of cardiac transplant  
42 Vesicoureteric reflux after renal transplant  
43 Ultrasonography guided biopsy of transplanted kidney  
44 Renal artery stenosis of transplanted kidney  
45 Part organ pancreatic transplant  
46 Post transplant lymphoproliferative disorder  
47 Orthotopic liver transplant  
48 Autotransplantation of kidney  
49 Live donor renal allotransplant  
50 Hypertension associated with transplantation  
51 Fluoroscopic angioplasty of renal transplant

1 Renal autotransplantation  
2 Corneal transplant  
3 CTx - Cardiac transplant  
4 [X]Renal tubulo-interstitial disorders/transplant rejection  
5 Autotransplant of kidney  
6 Auxillary liver transplant  
7 OS interventions associated with transplantation of kidney  
8 Transplanted organ complication NOS  
9 Xenotransplantation of heart  
10 Transplantation of kidney from cadaver  
11 Other specified transplantation of liver  
12 Aneurysm of artery of transplanted kidney  
13 Thrombosis of artery of transplanted kidney  
14 [RFC] Renal transplant  
15 Allotransplantation of kidney from live donor  
16 Acute rejection of renal transplant - grade II  
17 Ultrasonography of transplanted kidney with contrast  
18 Transplanted liver  
19 Transplant glomerulopathy  
20 Acute rejection of cardiac transplant  
21 Chronic rejection of lung transplant  
22 Autologous transplantation of pancreatic islet cells  
23 Radionuclide study of transplanted kidney  
24 Laparoscopic biopsy of transplanted kidney  
25 Entire transplant kidney  
26 Renal tubulo-interstitial disorders in transplant rejection  
27 Entire transplanted pancreas  
28 Lung transplant biopsy sample  
29 Ultrasonography guided biopsy of transplanted liver  
30 CT guided biopsy of transplanted liver  
31 Transplant glomerulopathy - early form  
32 Complication of transplanted kidney  
33 Fluoroscopic angiogram of transplanted liver  
34 Fluoroscopy guided removal of nephrostomy tube from transplanted kidney  
35 Entire transplanted liver  
36 [V]Heart transplanted  
37 Entire transplanted kidney  
38 Fluoroscopy guided percutaneous transhepatic transplantation of pancreatic islet cell  
39 History of renal transplant  
40 Eye structure transplantation  
41 Live donor renal transplant  
42 Allotransplantation of kidney from beating heart cadaver  
43 Percutaneous thrombolysis of vein of transplanted pancreas using fluoroscopic guidance  
44 Accelerated rejection of lung transplant  
45 Tissue specimen from transplanted kidney  
46 Other transplantation of heart  
47 History of lung transplant  
48 Kidney transplantation  
49 Cadaveric heart transplant  
50 Heterotopic allotransplant of heart

1 Allotransplant of heart  
2 Cadaver renal allotransplant  
3 Bronchiolitis obliterans syndrome after lung transplantation  
4 HtTx - Heart transplant  
5 Allotransplantation of kidney with DCD (donation after cardiac death)  
6 Heart transplantation  
7 Post-transplantation of kidney examination of recipient  
8 Allotransplantation of heart and lung  
9 Heart transplant with complication  
10 Orthotopic transplantation of liver NEC  
11 Transplantation of heart and lung  
12 Rupture of vein of transplanted kidney  
13 Stenosis of vein of transplanted kidney  
14 Post-transplant bronchiolitis obliterans syndrome  
15 Complication of transplanted lung  
16 Liver transplant  
17 Piggyback transplantation of heart  
18 Cardiothoracic transplantation  
19 Complication of transplanted lung  
20 Transplantation of pancreas and duodenum  
21 Transplantation of whole pancreas  
22 Revision of transplantation of heart and lung  
23 Transplant rejection  
24 Liver transplant failure and rejection  
25 Xenograft renal transplant  
26 Chronic rejection of renal transplant - grade II  
27 De novo transplant disease  
28 Complication of transplanted pancreas  
29 Transplantation of adrenal gland  
30 Hypertension secondary to kidney transplant  
31 Allotransplantation of left kidney  
32 Transluminal right ventricular biopsy after heart transplant  
33 Accelerated rejection of cardiac transplant  
34 Fluoroscopy guided antegrade insertion of ureteric stent into ureter of transplanted kidney  
35 [V]Cornea transplanted  
36 [V]Transplanted organ or tissue  
37 Liver transplant with recipient hepatectomy  
38 Anesthesia for heart transplant  
39 Biopsy of transplanted kidney using ultrasound guidance  
40 History of islet cell transplant  
41 Pre-existing disease in renal transplant  
42 Autotransplant of lung  
43 Structure of transplanted pancreatic islets  
44 CT of transplanted liver with contrast  
45 Total pancreatectomy with transplantation  
46 Magnetic resonance angiography of transplanted liver  
47 Specimen from transplanted lung obtained by biopsy  
48 Heart-lung transplant recipient  
49 Transplant of kidney using robotic assistance  
50 MRI of transplanted liver

1 US scan of transplant liver  
2 Heart transplant with recipient cardiectomy  
3 [V]Transplanted organ  
4 Ultrasound scan of transplanted kidney with contrast  
5 Acute rejection of liver transplant  
6 Allotransplantation of islets of Langerhans  
7 Fluoroscopy guided retrograde insertion of ureteric stent into ureter of transplanted kidney  
8 Disorder related to cardiac transplantation  
9 Orthotopic allotransplant of heart  
10 Renal transplant arteriogram  
11 Post-renal transplant vesicoureteric reflux  
12 Entire renal artery of transplanted kidney  
13 Renal homotransplantation with unilateral recipient nephrectomy  
14 [X]Surgical operation with transplant of whole organ as the cause of abnormal reaction of the patient  
15 Transplanted organ complication  
16 Allotransplantation of kidney from cadaver NEC  
17 HTx - Heart transplant  
18 Pancreatic transplant  
19 Transplanted pancreas pancreatectomy  
20 Transplant of kidney  
21 Fluoroscopic angioplasty of transplanted liver  
22 HLTx - Heart lung transplant  
23 Cornea transplant recipient  
24 Severe chronic transplant nephropathy  
25 Auxiliary liver transplant  
26 Disorder affecting transplanted structure  
27 Liver transplant with complication  
28 Other specified transplantation of pancreas  
29 Allotransplantation of heart NEC  
30 Revision of transplantation of heart NEC  
31 Other transplantation of heart NOS  
32 Under regular review by lung transplant unit  
33 Lung transplant  
34 Interventions associated with transplantation of kidney  
35 Transplant immunosuppression  
36 Acute rejection of renal transplant  
37 Acute rejection of renal transplant - grade III  
38 Chronic rejection of renal transplant  
39 Renal transplant biopsy sample  
40 Live donor liver transplant  
41 Ultrasonography guided insertion of nephrostomy tube into transplanted kidney  
42 Coronary arteriosclerosis in native artery of transplanted heart  
43 Liver transplant disorder  
44 Transplantation of heart  
45 History of heart recipient  
46 H/O: heart recipient  
47 History of - lung recipient  
48 H/O: lung recipient  
49 H/O: kidney recipient  
50 History of - kidney recipient

1  
2 H/O: liver recipient  
3 History of liver recipient  
4  
5  
6  
7  
8  
9  
10  
11  
12  
13  
14  
15  
16  
17  
18  
19  
20  
21  
22  
23  
24  
25  
26  
27  
28  
29  
30  
31  
32  
33  
34  
35  
36  
37  
38  
39  
40  
41  
42  
43  
44  
45  
46  
47  
48  
49  
50  
51  
52  
53  
54  
55  
56  
57  
58  
59  
60

For peer review only

## ICD-10 code Term

|        |                                                   |
|--------|---------------------------------------------------|
| Z94.0  | Kidney transplant status                          |
| Z94.1  | Heart transplant status                           |
| Z94.2  | Lung transplant status                            |
| Z94.3  | Heart and lungs transplant status                 |
| Z94.4  | Liver transplant status                           |
| Z94.6  | Bone transplant status                            |
| Z94.7  | Corneal transplant status                         |
| Z94.9  | Transplanted organ and tissue status, unspecified |
| Z94.82 | Intestine transplant status                       |
| Z94.83 | Pancreas transplant status                        |
| Z94.89 | Other transplanted organ and tissue status        |

For peer review only

|    | OPCS code | Term                              |
|----|-----------|-----------------------------------|
| 1  |           |                                   |
| 2  |           |                                   |
| 3  | B17       | Transplantation of thymus gland   |
| 4  | B17.1     | Transplantation of thymus gland   |
| 5  | B17.8     | Transplantation of thymus gland   |
| 6  |           |                                   |
| 7  | B17.9     | Transplantation of thymus gland   |
| 8  | E53       | Transplantation of lung           |
| 9  | E53.1     | Transplantation of lung           |
| 10 | E53.2     | Transplantation of lung           |
| 11 | E53.3     | Transplantation of lung           |
| 12 |           |                                   |
| 13 | E53.8     | Transplantation of lung           |
| 14 | E53.9     | Transplantation of lung           |
| 15 | G26       | Transplantation of stomach        |
| 16 | G26.1     | Transplantation of stomach        |
| 17 | G26.8     | Transplantation of stomach        |
| 18 |           |                                   |
| 19 | G26.9     | Transplantation of stomach        |
| 20 | G68       | Transplantation of ileum          |
| 21 | G68.1     | Transplantation of ileum          |
| 22 | G68.8     | Transplantation of ileum          |
| 23 | G68.9     | Transplantation of ileum          |
| 24 |           |                                   |
| 25 | J01       | Transplantation of liver          |
| 26 | J01.1     | Transplantation of liver          |
| 27 | J01.2     | Transplantation of liver          |
| 28 | J01.3     | Transplantation of liver          |
| 29 | J01.4     | Transplantation of liver          |
| 30 | J01.5     | Transplantation of liver          |
| 31 | J01.8     | Transplantation of liver          |
| 32 | J01.9     | Transplantation of liver          |
| 33 |           |                                   |
| 34 | J54       | Transplantation of pancreas       |
| 35 | J54.1     | Transplantation of pancreas       |
| 36 | J54.2     | Transplantation of pancreas       |
| 37 | J54.3     | Transplantation of pancreas       |
| 38 | J54.4     | Transplantation of pancreas       |
| 39 | J54.5     | Transplantation of pancreas       |
| 40 | J54.8     | Transplantation of pancreas       |
| 41 | J54.9     | Transplantation of pancreas       |
| 42 |           |                                   |
| 43 | J55.3     | Total excision of pancreas        |
| 44 |           |                                   |
| 45 | J72.1     | Other operations on spleen        |
| 46 | K01       | Transplantation of heart and lung |
| 47 | K01.1     | Transplantation of heart and lung |
| 48 | K01.2     | Transplantation of heart and lung |
| 49 | K01.8     | Transplantation of heart and lung |
| 50 | K01.9     | Transplantation of heart and lung |
| 51 |           |                                   |
| 52 | K02       | Other transplantation of heart    |
| 53 | K02.1     | Other transplantation of heart    |
| 54 | K02.2     | Other transplantation of heart    |
| 55 | K02.3     | Other transplantation of heart    |
| 56 | K02.4     | Other transplantation of heart    |
| 57 | K02.5     | Other transplantation of heart    |
| 58 | K02.6     | Other transplantation of heart    |
| 59 | K02.8     | Other transplantation of heart    |
| 60 |           |                                   |

|    |       |                                                         |
|----|-------|---------------------------------------------------------|
| 1  |       |                                                         |
| 2  | K02.9 | Other transplantation of heart                          |
| 3  | M01   | Transplantation of kidney                               |
| 4  | M01.1 | Transplantation of kidney                               |
| 5  | M01.2 | Transplantation of kidney                               |
| 6  | M01.3 | Transplantation of kidney                               |
| 7  | M01.4 | Transplantation of kidney                               |
| 8  | M01.5 | Transplantation of kidney                               |
| 9  | M01.8 | Transplantation of kidney                               |
| 10 | M01.9 | Transplantation of kidney                               |
| 11 |       |                                                         |
| 12 | M02.6 | Total excision of kidney                                |
| 13 | M02.7 | Total excision of kidney                                |
| 14 |       |                                                         |
| 15 | M08.4 | Other open operations on kidney                         |
| 16 | M17   | Interventions associated with transplantation of kidney |
| 17 | M17.4 | Interventions associated with transplantation of kidney |
| 18 | M17.8 | Interventions associated with transplantation of kidney |
| 19 | M17.9 | Interventions associated with transplantation of kidney |
| 20 |       |                                                         |
| 21 |       |                                                         |
| 22 |       |                                                         |
| 23 |       |                                                         |
| 24 |       |                                                         |
| 25 |       |                                                         |
| 26 |       |                                                         |
| 27 |       |                                                         |
| 28 |       |                                                         |
| 29 |       |                                                         |
| 30 |       |                                                         |
| 31 |       |                                                         |
| 32 |       |                                                         |
| 33 |       |                                                         |
| 34 |       |                                                         |
| 35 |       |                                                         |
| 36 |       |                                                         |
| 37 |       |                                                         |
| 38 |       |                                                         |
| 39 |       |                                                         |
| 40 |       |                                                         |
| 41 |       |                                                         |
| 42 |       |                                                         |
| 43 |       |                                                         |
| 44 |       |                                                         |
| 45 |       |                                                         |
| 46 |       |                                                         |
| 47 |       |                                                         |
| 48 |       |                                                         |
| 49 |       |                                                         |
| 50 |       |                                                         |
| 51 |       |                                                         |
| 52 |       |                                                         |
| 53 |       |                                                         |
| 54 |       |                                                         |
| 55 |       |                                                         |
| 56 |       |                                                         |
| 57 |       |                                                         |
| 58 |       |                                                         |
| 59 |       |                                                         |
| 60 |       |                                                         |



1  
2 Medcodeid  
3 40879015  
4 52728016  
5 287930013  
6 293742013  
7 296819018  
8 297440017  
9 297566017  
10 297643013  
11 303525019  
12 311616019  
13 312642016  
14 454209012  
15 477671011  
16 1223250017  
17 1231546012  
18 1232607019  
19 1494958019  
20 161591000006114  
21 3097031000006111  
22 3097041000006118  
23 3408911000006111  
24 3408931000006117  
25 3553221000006116  
26 3678391000006114  
27 3726191000006118  
28 4767881000006118  
29 4770621000006110  
30 4770931000006119  
31 4777241000006117  
32 5004751000006119  
33 5055171000006117  
34 5055491000006112  
35 5055541000006119  
36 5055561000006115  
37 5065841000006111  
38 5124931000006111  
39 6220621000006114  
40 6635151000006116  
41 6874111000006114  
42 300584016  
43 312576015  
44 359513016  
45 2534171012  
46 5011771000006111  
47 5141661000006114  
48 6635261000006114  
49 13938311000006118  
50 7278014  
51 32869011

For peer review only

1  
2 55627011  
3 55628018  
4 59922014  
5 308730016  
6 309400018  
7 309749012  
8 309760015  
9 309761016  
10 309764012  
11 309766014  
12 309771019  
13 309773016  
14 309775011  
15 309776012  
16 309777015  
17 309778013  
18 309783017  
19 309969012  
20 310034013  
21 310148010  
22 310149019  
23 310150019  
24 310151015  
25 310152010  
26 310153017  
27 310154011  
28 310155012  
29 310156013  
30 310157016  
31 310159018  
32 310181011  
33 310182016  
34 310183014  
35 310184015  
36 310185019  
37 310186018  
38 310187010  
39 310188017  
40 310189013  
41 310190016  
42 310191017  
43 310192012  
44 310197018  
45 310205010  
46 310216015  
47 310217012  
48 310944013  
49 311035015  
50 311036019  
51 312521010

For peer review only

1  
2 312523013  
3 312528016  
4 312529012  
5 312535012  
6 312536013  
7 312549015  
8 312552011  
9 312553018  
10 359167017  
11 359168010  
12 359169019  
13 359170018  
14 359171019  
15 359172014  
16 359310019  
17 359321011  
18 400192018  
19 400194017  
20 400195016  
21 400196015  
22 400197012  
23 400198019  
24 1209790019  
25 140551000006117  
26 221661000006114  
27 221671000006119  
28 394571000006116  
29 405421000000118  
30 492101000006119  
31 492131000006110  
32 492141000006117  
33 492171000006113  
34 492191000006114  
35 492201000006112  
36 492221000006119  
37 492231000006116  
38 492251000006111  
39 492281000006115  
40 492541000006111  
41 492731000006111  
42 493021000006115  
43 815501000006110  
44 905291000006113  
45 909461000006119  
46 909631000006114  
47 2558271000006115  
48 3994461000006114  
49 4515241000006118  
50 4515251000006116  
51 4515261000006119

For peer review only

1 4805761000006111  
2 5139361000006116  
3 5139451000006113  
4 5139461000006110  
5 5139581000006118  
6 5560451000006117  
7 6348841000006111  
8 6899881000006115  
9 6905901000006110  
10 7084091000006114  
11 8448331000006113  
12 8448361000006116  
13 8448381000006114  
14 8448401000006114  
15 8448461000006110  
16 8448481000006117  
17 8448551000006114  
18 8448591000006115  
19 8448621000006118  
20 8448631000006115  
21 8448661000006112  
22 8448671000006117  
23 8448741000006119  
24 8448761000006115  
25 8448801000006112  
26 8448821000006119  
27 8448851000006111  
28 8448861000006113  
29 8448891000006117  
30 8448941000006116  
31 9310141000006117  
32 9478071000006110  
33 9478081000006113  
34 9874721000006113  
35 9874751000006116  
36 9917831000006113  
37 9917841000006115  
38 12717341000006112  
39 41398015  
40 297177019  
41 297179016  
42 297180018  
43 297181019  
44 2674605012  
45 2692565012  
46 299241000000110  
47 300141000000119  
48 315671000000110  
49 641211000000118  
50 641301000000114

For peer review only

1  
2 695191000006119  
3 699671000000115  
4 699731000000110  
5 699791000000111  
6 699911000000117  
7  
8 905781000006118  
9 908811000006112  
10 979461000006111  
11 983261000006119  
12 983291000006110  
13 983301000006111  
14 983311000006114  
15  
16 1148911000000119  
17 1674121000000119  
18 1674381000000115  
19 1674661000000118  
20 1674971000000118  
21 1675051000000110  
22 1679791000006113  
23 1682241000006111  
24 1747821000006117  
25 1747831000006119  
26 1747851000006114  
27 1747861000006111  
28 1757431000000113  
29 1855101000006113  
30 1858501000006114  
31 1863341000006118  
32 2262931000000117  
33 2894411000006110  
34 4769281000006110  
35 5006891000006112  
36 5006901000006111  
37 5006911000006114  
38 5006921000006118  
39 5092791000006115  
40 5552111000006118  
41 7045281000006112  
42 7058051000006116  
43 7092351000006112  
44 7510741000006111  
45 7567771000006118  
46 7861151000006116  
47 854741000006113  
48  
49 G35  
50 7821651000006119  
51 7821661000006117  
52 2159899016  
53 7821671000006112  
54  
55 2812521000006111

For peer review only

1 303404016  
2 302322010  
3 309744019  
4 886291000006112  
5 303761010  
6 1222351011  
7 3047391000006119  
8 2621151000006116  
9 3414711000006118  
10 3420891000006119  
11 4785581000006112  
12 3113551000006113  
13 3316751000006117  
14 3316811000006110  
15 3316801000006112  
16 2559781000006115  
17 7837051000006115  
18 5083981000006114  
19 5083991000006112  
20 6582871000006114  
21 6664421000006111  
22 8463851000006112  
23 6582861000006119  
24 6664411000006115  
25 8464011000006119  
26 7954661000006112  
27 8463781000006114  
28 8463801000006113  
29 6664471000006112  
30 3497991000006117  
31 5082831000006111  
32 8463711000006119  
33 8463661000006113  
34 5082801000006115  
35 8463731000006113  
36 6664481000006110  
37 6664431000006114  
38 7877161000006117  
39 8463831000006117  
40 8463681000006115  
41 8464001000006117  
42 8463791000006112  
43 8463951000006115  
44 6839131000006116  
45 8463861000006114  
46 3648651000006113  
47 7988841000006110  
48 6632031000006117  
49 3984691000006116  
50 179501000006113

For peer review only

1  
2 601091000006115  
3 7060761000006112  
4 7988851000006112  
5 3984671000006117  
6 5083971000006111  
7  
8 6839121000006119  
9 5085631000006115  
10 3648641000006111  
11 3113541000006111  
12  
13 56765016  
14 3668461000006119  
15 8463641000006114  
16 8463771000006111  
17 6664491000006113  
18 601031000006119  
19  
20 6797991000006117  
21 6798001000006110  
22 6582851000006116  
23 3497981000006115  
24 3047411000006119  
25  
26 4784111000006112  
27 2532958014  
28 8463631000006116  
29 8463821000006115  
30 8463891000006118  
31  
32 302940016  
33 5082841000006118  
34 7877171000006112  
35 8463701000006117  
36 5082821000006113  
37 5082851000006116  
38 6664391000006115  
39 5085621000006118  
40 8463761000006116  
41 2559801000006116  
42 6853111000006114  
43 3414681000006119  
44 2621161000006119  
45 3420881000006117  
46 906051000006118  
47  
48 2532950019  
49 8463911000006116  
50 5082811000006117  
51 6664441000006116  
52 7988831000006117  
53 302941017  
54 6664451000006119  
55 8463811000006111  
56 6664401000006118  
57  
58 396357012  
59  
60

For peer review only

1 8463881000006116  
2 7060771000006117  
3 2559821000006114  
4 4808981000006112  
5 3414701000006116  
6 3527134013  
7 3984681000006119  
8 8463921000006112  
9 7821461000006119  
10 6632021000006115  
11 7959171000006110  
12 6582841000006118  
13 5073581000006111  
14 3668441000006118  
15 3668451000006116  
16 6664461000006117  
17 8463981000006111  
18 6853131000006115  
19 4784091000006115  
20 3047421000006110  
21 302939018  
22 302937016  
23 302947018  
24 179521000006115  
25 2559791000006117  
26 3047431000006113  
27 488238014  
28 497569010  
29 1495442018  
30 3047371000006115  
31 3420851000006113  
32 179571000006119  
33 3047381000006117  
34 56770011  
35 2713501000006112  
36 302953018  
37 302946010  
38 3316791000006111  
39 3316771000006110  
40 292553010  
41 459292011  
42 1780311019  
43 2288041000000110  
44 72711000006117  
45 84291000006117  
46 84371000006110  
47 84421000006115  
48 84451000006112  
49 2967831017  
50 84411000006111

For peer review only



1  
2 913931000006116  
3 12332281000006119  
4 8022441000006118  
5 6961081000006118  
6 6970621000006114  
7  
8 12331231000006110  
9 12363721000006110  
10 4757991000006116  
11 6050081000006114  
12 6980001000006117  
13  
14 12704951000006115  
15 84361000006115  
16 913541000006118  
17 84321000006114  
18 913781000006117  
19 84401000006113  
20  
21 12331221000006112  
22 12332271000006117  
23 8027491000006113  
24 8024761000006118  
25 12085801000006113  
26 12345471000006114  
27 8022601000006118  
28 12370631000006117  
29 8025181000006114  
30 8040341000006111  
31 8037821000006110  
32 8022431000006111  
33 8022551000006115  
34 8032761000006111  
35 8050091000006115  
36 8022561000006118  
37 8006221000006115  
38 8037831000006113  
39 7969211000006115  
40 12102641000006114  
41 8022401000006115  
42 8027471000006112  
43 12363211000006112  
44 8032741000006112  
45 7287641000006112  
46 8024771000006113  
47 8019531000006110  
48 7696791000006110  
49 3526507010  
50 6967091000006111  
51 8034431000006118  
52 8043591000006119  
53 8027411000006115  
54  
55 12370731000006114

For peer review only

1 8026051000006110  
2 12370711000006115  
3 12370871000006115  
4 8026071000006117  
5 8034841000006114  
6 8120371000006113  
7 6971871000006117  
8 7098241000006117  
9 8027391000006115  
10 12085811000006111  
11 8232111000006119  
12 12370791000006113  
13 84731000006111  
14 913841000006116  
15 928501000006119  
16 616621000006115  
17 913941000006114  
18 84721000006113  
19 913521000006113  
20 913661000006118  
21 84771000006114  
22 7098211000006116  
23 12370361000006118  
24 12363201000006114  
25 7966541000006112  
26 8026061000006112  
27 12085821000006115  
28 12370371000006113  
29 8019521000006112  
30 8027511000006119  
31 12704941000006117  
32 292541011  
33 12332751000006115  
34 12705071000006113  
35 12334621000006111  
36 3537388019  
37 12370281000006118  
38 7708091000006118  
39 7287611000006113  
40 913811000006115  
41 84341000006119  
42 457326014  
43 292540012  
44 7066041000006112  
45 12102631000006116  
46 8077141000006113  
47 12370721000006111  
48 928461000006119  
49 616611000006111  
50 8119341000006116

For peer review only

1  
2 12370891000006119  
3 8032751000006114  
4 12370801000006114  
5 8019541000006117  
6 8032731000006119  
7 6971901000006117  
8 12332761000006118  
9 12702371000006116  
10 84461000006114  
11 12345461000006119  
12 197984010  
13 3522045015  
14 12370621000006115  
15 7500221000006113  
16 7814941000006115  
17 4796311000006117  
18 12102661000006113  
19 8032781000006118  
20 8022541000006117  
21 8119331000006114  
22 12370611000006111  
23 7500251000006116  
24 938301000006114  
25 84441000006110  
26 84331000006112  
27 913481000006113  
28 5754581000006110  
29 12363671000006118  
30 84281000006115  
31 84301000006116  
32 84311000006118  
33 292548017  
34 12489581000006110  
35 7095251000006110  
36 429971019  
37 6969521000006113  
38 12370941000006118  
39 12370931000006111  
40 12370821000006116  
41 8022481000006112  
42 8022491000006110  
43 8027451000006119  
44 8043331000006112  
45 7969221000006111  
46 8043321000006114  
47 8032771000006116  
48 84431000006117  
49 913901000006112  
50 12370271000006116  
51 12363661000006113

For peer review only

1 8022461000006119  
2 12705001000006119  
3 12702361000006111  
4 84391000006111  
5 12370811000006112  
6 8043601000006110  
7 8034441000006111  
8 12370881000006117  
9 7075891000006110  
10 12370901000006115  
11 12085831000006117  
12 8030331000006117  
13 913451000006117  
14 84351000006117  
15 84381000006113  
16 913511000006117  
17 12334611000006115  
18 1665751000000119  
19 459161015  
20 459296014  
21 8025171000006111  
22 12370741000006116  
23 8032081000006115  
24 928521000006112  
25 299601000000114  
26 616681000006116  
27 616591000006117  
28 616601000006113  
29 616641000006110  
30 616651000006112  
31 616671000006119  
32 292482014  
33 616661000006114  
34 459162010  
35 771381000006115  
36 771401000006115  
37 772141000006118  
38 913651000006115  
39 913831000006114  
40 913921000006119  
41 913981000006115  
42 6051171000006117  
43 2949881000006116  
44 772181000006112  
45 913681000006111  
46 2949871000006119  
47 771331000006116  
48 771371000006118  
49 771411000006117  
50 772131000006111

For peer review only

1  
2 772151000006116  
3 787111000006112  
4 771421000006113  
5 2867421000006114  
6 772171000006114  
7  
8 913711000006112  
9 913891000006113  
10 771341000006114  
11 772161000006119  
12 913531000006111  
13  
14 2867431000006112  
15 11927551000006115  
16 459293018  
17 771361000006113  
18 913771000006115  
19 913801000006118  
20  
21 72651000006114  
22 6050071000006111  
23 6050041000006115  
24 77727018  
25  
26 771351000006111  
27 771391000006117  
28 913621000006112  
29 429972014  
30 292551012  
31 429970018  
32 457325013  
33 459294012  
34 292550013  
35  
36 84681000006118  
37 84711000006117  
38 84821000006118  
39 913461000006115  
40 913851000006119  
41 928491000006110  
42 928511000006116  
43 928531000006110  
44 938311000006112  
45 6960431000006119  
46 6970631000006112  
47 6972441000006117  
48 6979991000006111  
49 6050061000006116  
50 6980431000006116  
51 84751000006116  
52 913671000006113  
53 913791000006119  
54 1667941000000112  
55 913491000006111  
56 8022411000006117

For peer review only

1 8027421000006111  
2 7609891000006111  
3 12102651000006111  
4 12363221000006116  
5 12345481000006112  
6 6969531000006111  
7 7098221000006112  
8 84661000006111  
9 7966551000006114  
10 12702381000006118  
11 8014491000006111  
12 928471000006114  
13 84781000006112  
14 84801000006111  
15 2288011000000114  
16 6971881000006119  
17 7098231000006110  
18 913911000006110  
19 292543014  
20 6951081000006112  
21 6954991000006112  
22 6961901000006111  
23 84741000006118  
24 292538019  
25 12450761000006110  
26 8027461000006117  
27 7287621000006117  
28 6955501000006113  
29 6961091000006115  
30 84831000006115  
31 494564012  
32 459163017  
33 8232101000006117  
34 8027481000006110  
35 6971891000006116  
36 11903141000006113  
37 5754621000006110  
38 6965561000006116  
39 913551000006116  
40 459295013  
41 1658861000000113  
42 8030341000006110  
43 7609851000006117  
44 8027401000006118  
45 8027501000006117  
46 84811000006114  
47 84701000006115  
48 6962751000006117  
49 6986151000006117  
50 5754611000006119

For peer review only

1  
2 913821000006111  
3 72721000006113  
4 84651000006114  
5 84671000006116  
6 84761000006119  
7  
8 7287651000006114  
9 3253241000006117  
10 12336111000006119  
11 8440231000006115  
12  
13 9312981000006113  
14 6965571000006111  
15 8014501000006115  
16 12336121000006110  
17 7609881000006113  
18  
19 84691000006115  
20 7609841000006119  
21 8022471000006114  
22 8440241000006113  
23  
24 7708051000006112  
25 84791000006110  
26 3253231000006110  
27 6961101000006114  
28 6951091000006110  
29 6971921000006110  
30 6971911000006119  
31 6960441000006112  
32 6972451000006115  
33 6980441000006114  
34 9312991000006111  
35 7066051000006114  
36 479511000000117  
37 308739015  
38 308744010  
39 308749017  
40 357623013  
41 308731017  
42 4805951000006112  
43 4805991000006118  
44 4805831000006110  
45 4805871000006113  
46 6663771000006119  
47 6663861000006116  
48 6663811000006119  
49 6663831000006113  
50 6663581000006111  
51 6663691000006113  
52 6663601000006118  
53 6663641000006116  
54 5123871000006118  
55 6663661000006117  
56  
57  
58  
59  
60

For peer review only

1 6663901000006111  
2 5123981000006110  
3 6663911000006114  
4 6663891000006112  
5 308753015  
6 312521010  
7 198791000006112  
8 6663721000006115  
9 6663701000006113  
10 4805821000006112  
11 309331014  
12 905681000006112  
13 308733019  
14 7819261000006114  
15 5123881000006115  
16 6663551000006115  
17 6663651000006119  
18 6663621000006111  
19 6663801000006117  
20 308725015  
21 1583831000006118  
22 10111000033114  
23 6663881000006114  
24 6663681000006110  
25 6663871000006111  
26 5123971000006112  
27 5123911000006115  
28 6663711000006111  
29 308776017  
30 1629311000006117  
31 6663611000006115  
32 6663571000006113  
33 6663631000006114  
34 6663761000006114  
35 308750017  
36 40067019  
37 111418010  
38 5123891000006117  
39 5123901000006118  
40 6663731000006117  
41 4805751000006114  
42 308732012  
43 308740018  
44 7819251000006112  
45 309787016  
46 309790010  
47 309792019  
48 309794018  
49 309803012  
50 309816012  
51  
52  
53  
54  
55  
56  
57  
58  
59  
60

For peer review only



1  
2 485614018  
3 1778239014  
4 37126100000111  
5 187556100006119  
6 187557100006114  
7 187558100006112  
8 187559100006110  
9 187560100006119  
10 187561100006116  
11 227567100000111  
12 227579100000115  
13 311496011  
14 312518013  
15 312520011  
16 312534011  
17 168751000006115  
18 572143100006114  
19 660877100006110  
20 480922100006114  
21 480910100006114  
22 1190391100006111  
23 342890100006117  
24 342889100006116  
25 363656100006111  
26 3514956015  
27 3528266010  
28 572147100006112  
29 844728100006115  
30 3527061011  
31 3514958019  
32 3528262012  
33 376149100006113  
34 844003100006113  
35 3514955016  
36 284070100006117  
37 666522100006113  
38 845950100006119  
39 514172100006111  
40 3528259014  
41 572146100006117  
42 572149100006113  
43 804566100006112  
44 803035100006112  
45 572145100006119  
46 390175100006115  
47 707850100006113  
48 262095100006114  
49 3527731011  
50 844004100006115  
51 332248100006114

For peer review only

1 12114051000006110  
2 8440051000006118  
3 6665271000006114  
4 162101000006115  
5 162111000006117  
6 16911000006114  
7 451461014  
8 3390411000006113  
9 5721481000006110  
10 11904431000006111  
11 6665311000006114  
12 6665281000006112  
13 6665211000006117  
14 3042571000006112  
15 4809181000006117  
16 2275751000000111  
17 5139351000006118  
18 426510015  
19 309802019  
20 1786545019  
21 3527712017  
22 162081000006111  
23 7144151000006115  
24 8030361000006114  
25 6631621000006116  
26 5141691000006118  
27 3528264013  
28 7144161000006118  
29 7099641000006113  
30 3636541000006112  
31 3042581000006110  
32 309812014  
33 297641010  
34 116082011  
35 1779323014  
36 359292012  
37 5141711000006115  
38 11826151000006116  
39 3527737010  
40 309805017  
41 162051000006115  
42 162301000006117  
43 2196791000000119  
44 889731000006111  
45 297544012  
46 309791014  
47 309804018  
48 5141701000006118  
49 7176491000006113  
50 168761000006118

For peer review only

1  
2 309788014  
3 149911000006117  
4 162141000006118  
5 9357441000006116  
6 424981000006114  
7 162231000006117  
8 2275711000000112  
9 300221014  
10 3125671000006112  
11 12114061000006112  
12 8187771000006116  
13 8102191000006119  
14 8440071000006111  
15 8447181000006111  
16 2670341000006112  
17 162191000006110  
18 162341000006115  
19 2275501000000119  
20 2275831000000110  
21 909191000006119  
22 309789018  
23 309798015  
24 309800010  
25 5721501000006117  
26 162041000006117  
27 162131000006111  
28 219021000000114  
29 3428911000006119  
30 95067016  
31 6608791000006111  
32 6608781000006113  
33 1786505011  
34 889741000006118  
35 889761000006119  
36 889781000006112  
37 989331000006117  
38 989321000006115  
39 889751000006116  
40 889771000006114  
41 889791000006110  
42 889821000006118  
43 989291000006112  
44 989301000006113  
45 889811000006114  
46 989311000006111  
47 889801000006111  
48 3636511000006113  
49 3636521000006117  
50 3636571000006116  
51 92209015

For peer review only

1 114310015  
2 158442019  
3 309405011  
4 512234017  
5 1728151000006118  
6 309408013  
7 719321000006114  
8 308709013  
9 3619241000006113  
10 3691811000006110  
11 5140851000006119  
12 5128061000006112  
13 7701371000006112  
14 2675191000006111  
15 2573631000006113  
16 2573621000006110  
17 2675181000006113  
18 5141731000006114  
19 3086721000006111  
20 2573601000006117  
21 6682111000006115  
22 6682191000006113  
23 3744681000006118  
24 7951851000006113  
25 8091151000006111  
26 4054921000006114  
27 6682061000006116  
28 7951841000006111  
29 11851321000006119  
30 3086711000006115  
31 5140861000006117  
32 7861201000006113  
33 5128101000006110  
34 5141751000006119  
35 6682081000006114  
36 7615021000006116  
37 7861211000006111  
38 3086691000006118  
39 6682131000006114  
40 8091161000006113  
41 3744671000006116  
42 5140891000006113  
43 8155231000006110  
44 3343591000006116  
45 6681831000006111  
46 3087841000006114  
47 3765031000006115  
48 177301000006114  
49 7615031000006118  
50 5140881000006110

For peer review only

1 5055001000006112  
2 5140901000006112  
3 2675171000006110  
4 5124681000006116  
5 3086701000006118  
6 3691781000006113  
7 4597351000006115  
8 4060291000006118  
9 312579010  
10 7860991000006115  
11 8099911000006113  
12 8091171000006118  
13 3343601000006112  
14 7951831000006118  
15 2573611000006119  
16 6682091000006112  
17 3691801000006112  
18 8099901000006110  
19 6682221000006118  
20 6669061000006113  
21 8155241000006117  
22 6682101000006118  
23 4060271000006119  
24 301721015  
25 92208011  
26 6682171000006112  
27 8091131000006116  
28 7860981000006118  
29 8022621000006111  
30 6905051000006113  
31 6682031000006113  
32 3744691000006115  
33 2675201000006114  
34 6682161000006117  
35 2675161000006115  
36 6682141000006116  
37 3744661000006111  
38 6681821000006113  
39 6682041000006115  
40 3343611000006110  
41 4054931000006112  
42 6682151000006119  
43 4805601000006115  
44 7951821000006116  
45 297542011  
46 297639014  
47 6682071000006111  
48 7511501000006112  
49 114251000006118  
50 6670991000006115

For peer review only

1 3343621000006119  
2 8320771000006119  
3 5006111000006112  
4 4805591000006111  
5 453243010  
6 308697013  
7 5141741000006116  
8 6682121000006111  
9 6682051000006118  
10 5124671000006119  
11 2905941000006111  
12 6682181000006110  
13 3343631000006116  
14 3400601000006117  
15 677561000006119  
16 286303015  
17 308705019  
18 4056181000006118  
19 2812511000006115  
20 6682211000006114  
21 3691791000006111  
22 6682201000006111  
23 38247018  
24 297644019  
25 354512012  
26 4806451000006111  
27 3949121000006118  
28 4806521000006115  
29 3949101000006111  
30 4782401000006112  
31 4409371000006113  
32 11814811000006110  
33 3329051000006116  
34 6682251000006110  
35 6682331000006111  
36 5128201000006117  
37 6682381000006112  
38 7731531000006110  
39 4409391000006114  
40 6682321000006113  
41 3075191000006112  
42 8027031000006117  
43 5141061000006115  
44 4806501000006113  
45 308859010  
46 2619411000006117  
47 3526201000006116  
48 2619391000006117  
49 308855016  
50 4782411000006110

For peer review only

1  
2 354513019  
3 2619401000006115  
4 6682341000006118  
5 6682311000006117  
6 308871016  
7  
8 3921461000006118  
9 6682271000006117  
10 6682351000006116  
11 4806471000006118  
12  
13 6669071000006118  
14 6995961000006113  
15 4409411000006114  
16 8320761000006114  
17 5141051000006117  
18 6682231000006115  
19  
20 309413012  
21 6682291000006116  
22 5864721000006113  
23  
24 147834015  
25 5850811000006111  
26 6682241000006113  
27 7858421000006118  
28 5864711000006117  
29 6682361000006119  
30 7858411000006114  
31 6682301000006115  
32 6682261000006112  
33 3075181000006114  
34 4409381000006111  
35 7288571000006116  
36 301716018  
37 3921451000006115  
38 6682281000006119  
39 3526191000006119  
40 6669081000006115  
41 4770951000006114  
42 312581012  
43 6682391000006110  
44 8103261000006110  
45 4409361000006118  
46 3949131000006115  
47 53211014  
48 4409351000006115  
49 6682411000006110  
50 2863061000006117  
51 3329071000006114  
52 6682431000006116  
53 4806511000006111  
54 4409341000006117  
55 2619381000006115

For peer review only

1  
2 4806561000006114  
3 2619361000006113  
4 3329061000006119  
5 4409331000006110  
6 308867019  
7  
8 6682401000006112  
9 481428012  
10 4806541000006110  
11 6682421000006119  
12 107644019  
13 411061015  
14 85901000006116  
15 302956014  
16 3346691000006114  
17 3346681000006111  
18 8462351000006111  
19 7952051000006111  
20 7502561000006118  
21 8462411000006117  
22 3774141000006118  
23 2713501000006112  
24 2896501000006115  
25 8467581000006114  
26 3780301000006118  
27 2726621000006117  
28 2726631000006119  
29 8462371000006118  
30 6797981000006115  
31 7952041000006114  
32 4411741000006119  
33 7257811000006118  
34 7952021000006119  
35 1816421000006112  
36 7260561000006112  
37 8462391000006117  
38 3553391000006113  
39 906191000006113  
40 2532953017  
41 2872721013  
42 302953018  
43 8467541000006115  
44 2743411000006118  
45 3774151000006116  
46 8462331000006116  
47 3351341000006118  
48 303762015  
49 435370011  
50 8467551000006118  
51 3780311000006115  
52 85891000006115

For peer review only



1  
2 8467571000006111  
3 7952031000006116  
4 7294371000006118  
5 8467561000006116  
6 85931000006112  
7 8467591000006112  
8 309743013  
9 6705201000006110  
10 8462421000006113  
11 496249010  
12 8462541000006117  
13 3589851000006115  
14 8462531000006110  
15 8462441000006118  
16 8462461000006119  
17 8462461000006119  
18 3346671000006113  
19 8462481000006112  
20 8462511000006116  
21 3351311000006117  
22 8462601000006118  
23 8462581000006111  
24 8462611000006115  
25 8462561000006118  
26 496332018  
27 8462641000006116  
28 8462631000006114  
29 8462921000006118  
30 8462891000006112  
31 7821281000006113  
32 8462971000006117  
33 8462871000006111  
34 8462961000006112  
35 8462941000006113  
36 22303012  
37 3166561000006116  
38 3351321000006113  
39 3351351000006116  
40 3166571000006111  
41 6383601000006112  
42 2269901000000115  
43 2891431000006118  
44 5139611000006114  
45 41137017  
46 6204981000006116  
47 6797971000006118  
48 2601661000006118  
49 2338581000000110  
50 2269891000000116  
51  
52  
53  
54  
55  
56  
57  
58  
59  
60

Autoimmune Hepatitis

For peer review only

1 Term  
2 Pulmonary sarcoidosis  
3 Sarcoidosis  
4 Sarcoidosis of lung with sarcoidosis of lymph nodes  
5 [X]Sarcoidosis of other and combined sites  
6 Meningitis due to sarcoidosis  
7 Multiple cranial nerve palsies in sarcoidosis  
8 Polyneuropathy in sarcoidosis  
9 Myopathy due to sarcoidosis  
10 Hepatic granulomas in sarcoidosis  
11 Myositis in sarcoidosis  
12 [X]Myositis in sarcoidosis classified elsewhere  
13 Sarcoidosis of inferior turbinates  
14 Sarcoid arthropathy  
15 Sarcoidosis of lung  
16 Sarcoidosis of skin  
17 Sarcoidosis of lymph nodes  
18 Sarcoid myocarditis  
19 Sarcoid heart disease  
20 Granulomatous sarcoid nephropathy  
21 Renal sarcoidosis  
22 Cutaneous sarcoidosis  
23 Skin sarcoidosis  
24 Lymph node sarcoidosis  
25 Sarcoidosis, lupus pernio type  
26 Cardiac sarcoidosis  
27 Sarcoid meningitis  
28 Sarcoid neuropathy  
29 Sarcoid myopathy  
30 Sarcoid heart muscle disease  
31 Neurosarcoidosis  
32 Mediastinal lymph node sarcoidosis  
33 Stage 1 pulmonary sarcoidosis  
34 Stage 3 pulmonary sarcoidosis  
35 Stage 4 pulmonary sarcoidosis  
36 Ocular sarcoidosis  
37 Acute skin sarcoidosis  
38 Sarcoid arthritis  
39 Sarcoidal granuloma of skin  
40 Sarcoid uveitis  
41 Giant cell arteritis NOS  
42 [X]Other giant cell arteritis  
43 Giant cell arteritis with polymyalgia rheumatica  
44 Giant cell arteritis  
45 Cerebral arteritis in giant cell arteritis  
46 Giant cell arteritis without polymyalgia rheumatica  
47 Temporal giant cell arteritis  
48 Giant cell arteritis anterior ischaemic optic neuropathy  
49 Arthritis  
50 Arthritis mutilans

1 Psoriatic arthropathy  
2 Psoriatic arthritis  
3 Chronic arthritis  
4 Psoriatic arthropathy NOS  
5 Arthropathy  
6 Arthropathy associated with dermatological disorders  
7 Other general diseases with associated arthropathy  
8 Arthritis associated with other disease, shoulder  
9 Arthritis associated with other disease, elbow  
10 Arthritis associated with other disease, wrist  
11 Arthritis associated with other disease, hip  
12 Arthritis associated with other disease, knee  
13 Arthritis associated with other disease, ankle  
14 Arthritis associated with other disease, subtalar joint  
15 Arthritis associated with other disease, talonavicular joint  
16 Arthritis associated with other disease, other tarsal joint  
17 Arthropathy associated with disorders EC NOS  
18 Arthrosis of first carpometacarpal joint, unspecified  
19 Other and unspecified arthropathies  
20 Unspecified polyarthropathy of unspecified site  
21 Unspecified polyarthropathy of the shoulder region  
22 Unspecified polyarthropathy of the upper arm  
23 Unspecified polyarthropathy of the forearm  
24 Unspecified polyarthropathy of the hand  
25 Unspecified polyarthropathy of the pelvic region and thigh  
26 Unspecified polyarthropathy of the lower leg  
27 Unspecified polyarthropathy of the ankle and foot  
28 Unspecified polyarthropathy of other specified site  
29 Unspecified polyarthropathy of multiple sites  
30 Generalised arthritis  
31 Other specified arthropathy  
32 Other specified arthropathy of unspecified site  
33 Other specified arthropathy of the shoulder region  
34 Other specified arthropathy of the upper arm  
35 Other specified arthropathy of the forearm  
36 Other specified arthropathy of the hand  
37 Other specified arthropathy of the pelvic region and thigh  
38 Other specified arthropathy of the lower leg  
39 Other specified arthropathy of the ankle and foot  
40 Other specified arthropathy of other specified site  
41 Other specified arthropathy of multiple sites  
42 Other specified arthropathy NOS  
43 Arthropathy NOS, of unspecified site  
44 Arthropathy of joint of hand  
45 Arthropathy NOS, of other specified site  
46 Arthropathy NOS, of multiple sites  
47 Arthropathy of ankle and/or foot  
48 Other specified arthropathies  
49 Arthropathies NOS  
50 Psoriasis with arthropathy

1 [X]Other juvenile arthritis  
2 [X]Other specific arthropathies, not elsewhere classified  
3 [X]Other specified arthritis  
4 [X]Arthrosis  
5 Polyarthrosis  
6 [X]Other primary arthrosis of first carpometacarpal joint  
7 [X]Other secondary arthrosis of first carpometacarpal joint  
8 Arthrosis  
9 Arthritis of foot  
10 Ankle arthritis NOS  
11 Arthritis of knee  
12 Arthritis of hip  
13 Arthritis of wrist  
14 Arthritis of elbow  
15 Juvenile arthritis in psoriasis  
16 Distal interphalangeal psoriatic arthropathy  
17 Unspecified polyarthropathy or polyarthriti NOS  
18 Arthropathy NOS  
19 Arthropathy NOS, of the upper arm  
20 Arthropathy NOS, of the forearm  
21 Arthropathy NOS, of the pelvic region and thigh  
22 Arthropathy NOS, of the lower leg  
23 Arthritis of spine  
24 Arthritis of shoulder region joint  
25 Inflammatory polyarthriti  
26 Polyarthropathy  
27 Chronic arthritis of juvenile onset  
28 Referral to arthroscopy service  
29 Arthritis associated with other disease, 1st MTP joint  
30 Arthritis associated with other disease, DIP joint of finger  
31 Arthritis associated with other disease, dist rad-uln joint  
32 Arthritis associated with other disease, IP joint of toe  
33 Arthritis associated with other disease, lesser MTP joint  
34 Arthritis associated with other disease, MCP joint  
35 Arthritis associated with other disease, PIP joint of finger  
36 Arthritis associated with other disease, sacro-iliac joint  
37 Arthritis associated with other disease, sternoclavic joint  
38 Arthritis associated with other disease, tibio-fibular joint  
39 Arthropathy associated with another disorder  
40 Arthropathy associated with other conditions EC  
41 Arthropathy NOS  
42 Arthritis of hand  
43 [RFC] Arthritis  
44 [RFC] Arthritis  
45 [RFC] Arthropathy  
46 Inflammatory arthritis  
47 Arthritis of temporomandibular joint  
48 Psoriatic arthritis  
49 PsA (Psoriatic arthritis)  
50 PA (Psoriatic arthritis)

1 Psoriatic arthritis with spine involvement  
2 Juvenile chronic arthritis  
3 Juvenile psoriatic arthritis  
4 Juvenile psoriatic arthritis with psoriasis  
5 Psoriatic arthritis with distal interphalangeal joint involvement  
6 Arthritis/arthrosis  
7 Arthritis of spine  
8 Polyarthritis  
9 Inflammatory arthritis of multiple joints  
10 Arthritis of joint of toe  
11 Arthritis of left glenohumeral joint  
12 Arthritis of right glenohumeral joint  
13 Arthritis of right sternoclavicular joint  
14 Arthritis of left elbow  
15 Arthritis of left wrist  
16 Arthritis of right wrist  
17 Bilateral arthritis of finger of hand  
18 Arthritis of bilateral carpometacarpal joint of thumbs  
19 Arthritis of first carpometacarpal joint of left hand  
20 Arthritis of carpometacarpal joint of left thumb  
21 Arthritis of first carpometacarpal joint of right hand  
22 Arthritis of carpometacarpal joint of right thumb  
23 Arthritis of left ankle  
24 Arthritis of left foot  
25 Arthritis of right ankle  
26 Arthritis of right foot  
27 Bilateral arthritis of ankle  
28 Arthritis of bilateral ankle  
29 Arthritis of bilateral feet  
30 Arthritis of right sacroiliac joint  
31 Psoriatic arthritis mutilans  
32 Arthritis of finger of left hand  
33 Arthritis of finger of right hand  
34 Arthritis of left subtalar joint  
35 Arthritis of right subtalar joint  
36 Arthritis of facet joint of lumbar spine  
37 Arthritis of facet joint of cervical spine  
38 Arthritis associated with other disease, knee  
39 Multiple sclerosis  
40 Multiple sclerosis of the spinal cord  
41 Generalised multiple sclerosis  
42 Exacerbation of multiple sclerosis  
43 Multiple sclerosis NOS  
44 Secondary progressive multiple sclerosis  
45 Primary progressive multiple sclerosis  
46 Multiple sclerosis review  
47 Multiple sclerosis care plan agreed  
48 Multiple sclerosis multidisciplinary review  
49 Benign multiple sclerosis  
50 Malignant multiple sclerosis

1 Multiple sclerosis of the brain stem  
2 Management of multiple sclerosis in onset phase  
3 Management of multiple sclerosis in early disease phase  
4 Management of multiple sclerosis in stable disability phase  
5 Management of multiple sclerosis in palliative phase  
6 [RFC] Multiple sclerosis  
7 [RFC] Multiple sclerosis  
8 Specialised services for patients with multiple sclerosis enhanced services administration  
9 Multiple sclerosis - personal health plan  
10 Multiple sclerosis - primary progressive  
11 Multiple sclerosis - secondary progressive  
12 Multiple sclerosis - relapsing remitting  
13 Multiple sclerosis review declined  
14 Multiple sclerosis monitoring administration  
15 Multiple sclerosis monitoring first letter  
16 Multiple sclerosis monitoring second letter  
17 Multiple sclerosis monitoring telephone invitation  
18 Multiple sclerosis monitoring third letter  
19 Management of multiple sclerosis in progressive disability phase  
20 Relapsing remitting multiple sclerosis  
21 Multiple sclerosis monitoring administration  
22 Multiple sclerosis monitoring first letter  
23 Multiple sclerosis monitoring third letter  
24 Multiple sclerosis monitoring telephone invite  
25 Referral to community multiple sclerosis team  
26 Multiple sclerosis questionnaire completed  
27 Suspected multiple sclerosis  
28 Referral by Multiple Sclerosis nurse specialist  
29 Suspected multiple sclerosis  
30 MS - Multiple sclerosis  
31 Multiple sclerosis of the brainstem  
32 Acute relapsing multiple sclerosis  
33 Chronic progressive multiple sclerosis  
34 Multiple sclerosis (MS) chronic/progressive  
35 Remittent-progressive multiple sclerosis  
36 Excision of multiple scrotal sebaceous cysts  
37 Kurtzke multiple sclerosis rating scale  
38 Multiple sclerosis (MS) secondary progressive  
39 Multiple sclerosis (MS) relapsing remitting  
40 Multiple sclerosis (MS) primary progressive  
41 Dementia associated with multiple sclerosis  
42 Multiple sclerosis clinic  
43 Progressive relapsing multiple sclerosis  
44 Possible MS  
45 Multiple sclerosis  
46 Autoimmune hepatitis type 1  
47 Autoimmune hepatitis type 2  
48 Autoimmune hepatitis  
49 Autoimmune hepatitis type 3  
50 Lupoid hepatitis

1 Autoimmune chronic active hepatitis  
2 Orofacial Crohn's disease  
3 Arthropathy in Crohn's disease  
4 Regional enteritis - Crohn  
5 [X]Other Crohn's disease  
6 Crohn's disease NOS  
7 CD - Crohn's disease  
8 Crohn disease of large bowel  
9 Crohn disease of duodenum  
10 Crohns disease, small intestine  
11 Crohn disease of terminal ileum  
12 Crohn disease of ileum  
13 Crohn's disease of colon  
14 Crohns disease, colon  
15 Crohn disease of colon  
16 Crohn's disease of rectum  
17 Crohn's disease of gastrointestinal anastomosis  
18 Crohn's gastritis  
19 Crohn disease of stomach  
20 Crohn disease of intestine  
21 Crohn's disease of penis  
22 Fistula of small intestine due to Crohn's disease  
23 Crohn's disease of intestine  
24 Crohn disease of vulva  
25 Rectal hemorrhage due to Crohn's disease  
26 Crohn disease of appendix  
27 Intestinal obstruction due to Crohn's disease of small and large intestine  
28 Rectal hemorrhage due to Crohn's disease of small and large intestines  
29 Crohn disease of scrotum  
30 Crohn disease of pylorus  
31 Crohn's disease of esophagus  
32 Rectal hemorrhage due to Crohn's disease of large intestine  
33 Fistula of large intestine due to Crohn's disease  
34 Crohn's disease of oesophagus  
35 Abscess of intestine co-occurrent and due to Crohn's disease of small and large intestine  
36 Metastatic Crohn's disease of skin  
37 Penile Crohn's disease  
38 Extraintestinal Crohn's  
39 Complication due to Crohn's disease of small intestine  
40 Intestinal obstruction due to Crohn's disease of large intestine  
41 Rectal haemorrhage due to Crohn's disease  
42 Rectal haemorrhage due to Crohn's disease of small and large intestines  
43 Complication due to Crohn's disease  
44 Crohn stricture of colon  
45 Intestinal obstruction due to Crohn's disease of small intestine  
46 Crohn disease of pyloric antrum  
47 Crohn's disease with arthritis  
48 Crohn disease of skin  
49 Crohn disease of jejunum  
50 Crohn's regional enteritis

1 Crohn's disease of terminal ileum  
2 Crohn's disease in remission  
3 Arthritis co-occurrent and due to Crohn disease  
4 Crohn's disease of jejunum  
5 Crohn's disease of stomach  
6 Crohn's stricture of colon  
7 Perianal Crohn disease  
8 Crohn's disease of pyloric antrum  
9 Crohn's ileitis  
10 Crohn's disease  
11 Crohn's disease of small intestine and colon  
12 Complication due to Crohn's disease of large intestine  
13 Fistula of intestine due to Crohn's disease of small and large intestine  
14 Metastatic Crohn disease of skin  
15 CC - Crohn's colitis  
16 Iritis with Crohn's disease  
17 Iritis with Crohn disease  
18 Gastrointestinal Crohn disease  
19 Crohn's disease of pylorus  
20 Crohn disease  
21 Oral Crohn's disease  
22 Exacerbation of Crohn's disease of small intestine  
23 Abscess of intestine co-occurrent and due to Crohn's disease of large intestine  
24 Abscess of small intestine due to Crohn's disease  
25 Rectal hemorrhage due to Crohn's disease of small intestine  
26 Crohn's disease of ileum  
27 Crohn disease of esophagus  
28 Extra-intestinal Crohn's  
29 Rectal haemorrhage due to Crohn's disease of large intestine  
30 Crohn's oesophagitis  
31 Crohn disease of oesophagus  
32 Crohn's disease of vulva  
33 Perianal Crohn's disease  
34 Complication due to Crohn's disease of small and large intestines  
35 Crohn's proctitis  
36 Exacerbation of Crohn disease of large intestine  
37 Crohn's disease of duodenum  
38 Crohns disease, large intestine  
39 Crohn disease of small intestine  
40 [RFC] Crohns disease  
41 Exacerbation of Crohn's disease of large intestine  
42 Abscess of intestine co-occurrent and due to Crohn's disease  
43 Crohn's esophagitis  
44 Crohn disease of penis  
45 Arthritis co-occurrent and due to Crohn's disease  
46 Crohn's disease of small intestine  
47 Crohn's disease of scrotum  
48 Abscess of intestine co-occurrent and due to Crohn's disease of small intestine  
49 Vulval Crohn's disease  
50 Crohn's disease of large bowel



1 Rectal haemorrhage due to Crohn's disease of small intestine  
2 Crohn disease in remission  
3 Crohn disease of rectum  
4 Arthropathy in Crohn disease  
5 Crohn's duodenitis  
6 Crohn disease of upper gastrointestinal tract  
7 Crohn's jejunitis  
8 Abscess of intestine due to Crohn's disease  
9 Crohn disease of anal canal  
10 Crohn's disease of skin  
11 Perianal fistula due to Crohn's disease  
12 Gastrointestinal Crohn's disease  
13 Crohn's disease of gingivae  
14 Crohn's disease of small AND large intestines  
15 Crohn disease of small AND large intestines  
16 Scrotal Crohn's disease  
17 Intestinal obstruction due to Crohn's disease  
18 Exacerbation of Crohn disease of small intestine  
19 Crohn's disease of oral soft tissues  
20 Crohns disease  
21 Crohn's disease of the ileum unspecified  
22 Regional enteritis of the jejunum  
23 Regional enteritis NOS  
24 Regional enteritis of the colon  
25 Regional enteritis of rectum  
26 RE - regional enteritis  
27 Regional enteritis of the rectum  
28 Regional enteritis of the duodenum  
29 Regional enteritis of the large bowel  
30 Regional enteritis  
31 Regional enteritis of small intestine  
32 Regional enteritis of the small bowel  
33 Granulomatous enteritis  
34 Granulomatous enteritis  
35 Chronic ulcerative ileocolitis  
36 Ulcerative ileocolitis  
37 Regional ileocolitis  
38 GC - Granulomatous colitis  
39 Granulomatous colitis  
40 Type 1 diabetes mellitus maturity onset  
41 Type 1 diabetes mellitus with arthropathy  
42 Type 1 diabetes mellitus with persistent microalbuminuria  
43 Type 1 diabetes mellitus in remission  
44 Unstable type 1 diabetes mellitus  
45 Type 1 diabetes mellitus - poor control  
46 Type 1 diabetes mellitus with nephropathy  
47 Type 1 diabetes mellitus with polyneuropathy  
48 Type 1 diabetes mellitus with ulcer  
49 Pre-existing type 1 diabetes mellitus in pregnancy  
50 Type 1 diabetes mellitus with peripheral angiopathy

1 Type 1 diabetes mellitus with peripheral angiopathy  
2 Retinopathy co-occurrent and due to type 1 diabetes mellitus  
3 Neuropathic arthropathy due to type 1 diabetes mellitus  
4 Gangrene associated with type 1 diabetes mellitus  
5 Peripheral circulatory disorder associated with type 1 diabetes mellitus  
6 Exudative maculopathy co-occurrent and due to type 1 diabetes mellitus  
7 Polyneuropathy co-occurrent and due to type 1 diabetes mellitus  
8 Type 1 diabetes mellitus with hyperosmolar coma  
9 Type 1 diabetes mellitus with hypoglycemic coma  
10 Kidney disorder associated with type 1 diabetes mellitus  
11 Diabetic retinopathy associated with type 1 diabetes mellitus  
12 Type 1 diabetes mellitus with multiple complications  
13 Type 1 diabetes mellitus with multiple complications  
14 Type 1 diabetes mellitus with diabetic cataract  
15 Type 1 diabetes mellitus with mononeuropathy  
16 Type 1 diabetes mellitus with ophthalmic complications  
17 Exudative maculopathy with type 1 diabetes mellitus  
18 Retinopathy with type 1 diabetes mellitus  
19 Chronic kidney disease stage 5 due to type 1 diabetes mellitus  
20 Traction retinal detachment due to type 1 diabetes mellitus  
21 Macular oedema due to type 1 diabetes mellitus  
22 Lumbosacral radiculoplexus neuropathy co-occurrent and due to type 1 diabetes mellitus  
23 Chronic ulcer of skin due to type 1 diabetes mellitus  
24 Peripheral neuropathy with type 1 diabetes mellitus  
25 Hypoglycemia due to type 1 diabetes mellitus  
26 Hypertension concurrent and due to end stage renal disease on dialysis due to type 1 diabetes mellitu  
27 Hypoglycaemic unawareness in type 1 diabetes mellitus  
28 Nephrotic syndrome due to type 1 diabetes mellitus  
29 Severe malnutrition due to type 1 diabetes mellitus  
30 Vitreous haemorrhage due to type 1 diabetes mellitus  
31 Foot ulcer due to type 1 diabetes mellitus  
32 Osteomyelitis due to type 1 diabetes mellitus  
33 Microalbuminuria due to type 1 diabetes mellitus  
34 Hypoglycemic unawareness in type 1 diabetes mellitus  
35 Mixed hyperlipidaemia due to type 1 diabetes mellitus  
36 Cranial nerve palsy due to type 1 diabetes mellitus  
37 Hypertension in chronic kidney disease due to type 1 diabetes mellitus  
38 Chronic kidney disease stage 4 due to type 1 diabetes mellitus  
39 Autonomic neuropathy co-occurrent and due to type 1 diabetes mellitus  
40 Retinal ischemia due to type 1 diabetes mellitus  
41 Type 1 diabetes mellitus well controlled  
42 Rubeosis iridis due to type 1 diabetes mellitus  
43 Proliferative retinopathy due to type 1 diabetes mellitus  
44 Diabetic autonomic neuropathy due to type 1 diabetes mellitus  
45 Disorder of nerve co-occurrent and due to type 1 diabetes mellitus  
46 Diabetic oculopathy associated with type 1 diabetes mellitus  
47 Retinal oedema due to type 1 diabetes mellitus  
48 Mild nonproliferative retinopathy due to type 1 diabetes mellitus  
49 Chronic kidney disease stage 2 due to type 1 diabetes mellitus  
50 Rubeosis iridis with type 1 diabetes mellitus

1 Ankle ulcer due to type 1 diabetes mellitus  
2 Traction retinal detachment with type 1 diabetes mellitus  
3 Retinal oedema with type 1 diabetes mellitus  
4 Forefoot ulcer due to type 1 diabetes mellitus  
5 Ulcer of lower limb due to type 1 diabetes mellitus  
6 Dyslipidemia due to type 1 diabetes mellitus  
7 Hypoglycaemic coma in type 1 diabetes mellitus  
8 Dietary advice for type 1 diabetes  
9 Chronic kidney disease stage 1 due to type 1 diabetes mellitus  
10 Macular edema due to type 1 diabetes mellitus  
11 Referral to type 1 diabetes structured education programme  
12 Retinal ischaemia with type 1 diabetes mellitus  
13 Multiple complications of type 1 diabetes mellitus  
14 Renal disorder associated with type 1 diabetes mellitus  
15 Ketoacidosis in type 1 diabetes mellitus  
16 Type 1 diabetes mellitus without complication  
17 Peripheral angiopathy due to type 1 diabetes mellitus  
18 Mononeuropathy with type 1 diabetes mellitus  
19 Neurological disorder with type 1 diabetes mellitus  
20 Retinopathy with type 1 diabetes mellitus  
21 Disorder of eye with type 1 diabetes mellitus  
22 Dietary education for type 1 diabetes mellitus  
23 Erectile dysfunction with type 1 diabetes mellitus  
24 Autonomic neuropathy with type 1 diabetes mellitus  
25 Diabetic erectile dysfunction associated with type 1 diabetes mellitus  
26 Heel AND/OR midfoot ulcer due to type 1 diabetes mellitus  
27 Macular edema co-occurrent and due to type 1 diabetes mellitus  
28 Erectile dysfunction co-occurrent and due to type 1 diabetes mellitus  
29 Nonproliferative diabetic retinopathy due to type 1 diabetes mellitus  
30 End stage renal disease on dialysis due to type 1 diabetes mellitus  
31 Neurological disorder associated with type 1 diabetes mellitus  
32 Type 1 diabetes mellitus with gangrene  
33 Mononeuropathy with type 1 diabetes mellitus  
34 Gastroparesis due to type 1 diabetes mellitus  
35 Neurological disorder co-occurrent and due to type 1 diabetes mellitus  
36 Diabetic oculopathy due to type 1 diabetes mellitus  
37 Disorder of eye co-occurrent and due to type 1 diabetes mellitus  
38 Polyneuropathy due to type 1 diabetes mellitus  
39 Type 1 diabetes mellitus uncontrolled  
40 Type 1 diabetes mellitus with polyneuropathy  
41 Type 1 diabetes mellitus with hypoglycaemic coma  
42 Type 1 diabetes mellitus without complication  
43 Type 1 diabetes mellitus with ulcer  
44 Small vessel disease due to type 1 diabetes mellitus  
45 Cranial nerve palsy with type 1 diabetes mellitus  
46 Proteinuria due to type 1 diabetes mellitus  
47 Traction retinal detachment co-occurrent and due to type 1 diabetes mellitus  
48 Persistent proteinuria associated with type 1 diabetes mellitus  
49 Disorder due to type 1 diabetes mellitus  
50 Hyperglycemia due to type 1 diabetes mellitus

1  
2 Retinal oedema co-occurrent and due to type 1 diabetes mellitus  
3 Diabetic vitreous haemorrhage due to type 1 diabetes mellitus  
4 Retinal ischemia with type 1 diabetes mellitus  
5 Blindness due to type 1 diabetes mellitus  
6 Retinal ischaemia due to type 1 diabetes mellitus  
7 Hypoglycemic coma in type 1 diabetes mellitus  
8 Mononeuropathy co-occurrent and due to type 1 diabetes mellitus  
9 Mononeuropathy associated with type 1 diabetes mellitus  
10 Type 1 diabetes mellitus without complication  
11 Lumbosacral radiculoplexus neuropathy with type 1 diabetes mellitus  
12 Type 1 diabetes mellitus  
13 Hyperosmolarity due to type 1 diabetes mellitus  
14 Blindness co-occurrent and due to type 1 diabetes mellitus  
15 Pre-existing type 1 diabetes mellitus in pregnancy  
16 Acidosis due to type 1 diabetes mellitus  
17 Pre-existing type 1 diabetes mellitus  
18 Cranial nerve palsy co-occurrent and due to type 1 diabetes mellitus  
19 Diabetic vitreous hemorrhage due to type 1 diabetes mellitus  
20 Diabetic dermopathy due to type 1 diabetes mellitus  
21 Hyperglycaemia due to type 1 diabetes mellitus  
22 Nonproliferative retinopathy co-occurrent and due to type 1 diabetes mellitus  
23 Pregnancy and type 1 diabetes mellitus  
24 Exudative maculopathy with type 1 diabetes mellitus  
25 Type 1 diabetes mellitus with retinopathy  
26 Type 1 diabetes mellitus with gangrene  
27 Type 1 diabetes mellitus with ophthalmic complications  
28 Brittle type 1 diabetes mellitus  
29 Gastroparesis co-occurrent and due to type 1 diabetes mellitus  
30 Type 1 diabetes mellitus  
31 Type 1 diabetes mellitus maturity onset  
32 Type 1 diabetes mellitus with arthropathy  
33 Type 1 diabetes mellitus - poor control  
34 Type 1 diabetes mellitus with gangrene  
35 Hyperosmolality due to uncontrolled type 1 diabetes mellitus  
36 Unstable type 1 diabetes mellitus  
37 Persistent microalbuminuria associated with type 1 diabetes mellitus  
38 Moderate nonproliferative retinopathy co-occurrent and due to type 1 diabetes mellitus  
39 Mild nonproliferative retinopathy co-occurrent and due to type 1 diabetes mellitus  
40 Retinal ischemia co-occurrent and due to type 1 diabetes mellitus  
41 Peripheral neuropathy due to type 1 diabetes mellitus  
42 Peripheral neuropathy co-occurrent and due to type 1 diabetes mellitus  
43 Chronic kidney disease stage 3 due to type 1 diabetes mellitus  
44 Hyperlipidemia due to type 1 diabetes mellitus  
45 Mixed hyperlipidemia due to type 1 diabetes mellitus  
46 Hyperlipidaemia due to type 1 diabetes mellitus  
47 Vitreous hemorrhage due to type 1 diabetes mellitus  
48 Type 1 diabetes mellitus with renal complications  
49 Type 1 diabetes mellitus with diabetic cataract  
50 Disorder of eye with type 1 diabetes mellitus  
51 Gastroparesis with type 1 diabetes mellitus  
52  
53  
54  
55  
56  
57  
58  
59  
60

1  
2 Diabetic neuropathic arthropathy due to type 1 diabetes mellitus  
3 Exudative maculopathy associated with type 1 diabetes mellitus  
4 Diabetic cataract associated with type 1 diabetes mellitus  
5 Type 1 diabetes mellitus with neuropathic arthropathy  
6 Retinal ischaemia co-occurrent and due to type 1 diabetes mellitus  
7 Moderate nonproliferative retinopathy due to type 1 diabetes mellitus  
8 Retinal edema due to type 1 diabetes mellitus  
9 Retinal edema with type 1 diabetes mellitus  
10 Amyotrophy due to type 1 diabetes mellitus  
11 Retinal edema co-occurrent and due to type 1 diabetes mellitus  
12 Macular oedema co-occurrent and due to type 1 diabetes mellitus  
13 Chronic kidney disease due to type 1 diabetes mellitus  
14 Type 1 diabetes mellitus with renal complications  
15 Type 1 diabetes mellitus with mononeuropathy  
16 Type 1 diabetes mellitus with neurological complications  
17 Type 1 diabetes mellitus with neurological complications  
18 Neurological disorder with type 1 diabetes mellitus  
19 Type 1 diabetic dietary review  
20 Type 1 diabetes mellitus with hypoglycaemic coma  
21 Type 1 diabetes mellitus with neuropathic arthropathy  
22 Hypoglycaemia due to type 1 diabetes mellitus  
23 Rubeosis iridis co-occurrent and due to type 1 diabetes mellitus  
24 Sensory neuropathy due to type 1 diabetes mellitus  
25 Ketoacidotic coma in type 1 diabetes mellitus  
26 Gastroparesis with type 1 diabetes mellitus  
27 Diabetes mellitus, juvenile, + other specified manifestation  
28 Diabetes mellitus, juvenile +peripheral circulatory disorder  
29 Diabetes mellitus, juvenile type, + ophthalmic manifestation  
30 Diabetes mellitus, juvenile type, with ketoacidosis  
31 Diabetes mellitus, juvenile type, with ketoacidotic coma  
32 Diabetes mellitus, juvenile, + neurological manifestation  
33 Diabetes mellitus, juvenile type, with hyperosmolar coma  
34 Diabetes mellitus, juvenile type, with renal manifestation  
35 Insulin dependent diabetes mellitus with hypoglycaemic coma  
36 Insulin dependent diabetes mellitus with multiple complicatn  
37 Insulin dependent diabetes mellitus with polyneuropathy  
38 Insulin dependent diab mell with peripheral angiopathy  
39 Insulin dependent diabetes mellitus with retinopathy  
40 Insulin dependent diabetes mellitus with nephropathy  
41 Insulin dependent diab mell with peripheral angiopathy  
42 Insulin dependent diab mell with neuropathic arthropathy  
43 Insulin dependent diabetes mellitus with arthropathy  
44 Insulin dependent diabetes mellitus type 1B  
45 Insulin dependent diabetes mellitus - poor control  
46 Insulin dependent diabetes mellitus - poor control  
47 Insulin dependent diabetes mellitus type 1B  
48 Insulin dependent diabetes mellitus with arthropathy  
49 Insulin dependent diabetes mellitus with mononeuropathy  
50 Insulin dependent diabetes mellitus with retinopathy  
51 Insulin dependent diab mell with neuropathic arthropathy

1 Insulin dependent diabetes maturity onset  
2 IDDM-Insulin dependent diabetes mellitus  
3 Insulin dependent diabetes mellitus with ulcer  
4 Insulin dependent diabetes mellitus type 1A  
5 Insulin dependent diabetes mellitus  
6 Insulin dependent diabetes maturity onset  
7 Insulin dependent diabetes mellitus with diabetic cataract  
8 Insulin dependent diabetes mellitus with diabetic cataract  
9 Insulin dependent diabetes mellitus  
10 Insulin dependent diabetes mellitus with multiple complicat  
11 Insulin dependent diabetes mellitus type IA  
12 Insulin dependent diabetes mellitus with ulcer  
13 Insulin dependent diabetes mellitus with arthropathy  
14 Insulin dependent diabetes mellitus with hypoglycaemic coma  
15 Insulin dependent diabetes mellitus with mononeuropathy  
16 Insulin dependent diabetes mellitus with polyneuropathy  
17 Unstable insulin dependent diabetes mellitus  
18 Insulin dependent diabetes mellitus with hypoglycemic coma  
19 Insulin dependent diabetes mellitus with hypoglycaemic coma  
20 Insulin dependent diabetes mellitus  
21 Insulin dependent diabetes mellitus with gangrene  
22 Insulin dependent diabetes mellitus with nephropathy  
23 Insulin dependent diabetes mellitus with gangrene  
24 Unstable insulin dependent diabetes mellitus  
25 Type I diabetes mellitus maturity onset  
26 Unstable type I diabetes mellitus  
27 Type I diabetes mellitus without complication  
28 Type I diabetes mellitus with arthropathy  
29 Type I diabetes mellitus - poor control  
30 Type I diabetes mellitus with arthropathy  
31 Type I diabetes mellitus with hypoglycaemic coma  
32 Type I diabetes mellitus with ulcer  
33 Type I diabetes mellitus with renal complications  
34 Type I diabetes mellitus with nephropathy  
35 Type I diabetes mellitus with persistent microalbuminuria  
36 Type I diabetes mellitus with ketoacidosis  
37 Type I diabetes mellitus with ketoacidotic coma  
38 Type I diabetes mellitus with exudative maculopathy  
39 Diabetic retinopathy associated with type I diabetes mellitus  
40 Peripheral circulatory disorder associated with type I diabetes mellitus  
41 Neurological disorder associated with type I diabetes mellitus  
42 Renal disorder associated with type I diabetes mellitus  
43 Type I diabetes mellitus with hypoglycemic coma  
44 Diabetic cataract associated with type I diabetes mellitus  
45 Type I diabetes mellitus with neurological complications  
46 Type I diabetes mellitus with retinopathy  
47 Type I diabetes mellitus with mononeuropathy  
48 Type I diabetes mellitus with gastroparesis  
49 Type I diabetes mellitus with ophthalmic complications  
50 Hypertension in chronic kidney disease due to type I diabetes mellitus

1  
2 Chronic kidney disease stage 2 due to type I diabetes mellitus  
3 Retinopathy due to brittle type I diabetes mellitus  
4 Cranial nerve palsy with type I diabetes mellitus  
5 Autonomic neuropathy with type I diabetes mellitus  
6 Lumbosacral radiculoplexus neuropathy with type I diabetes mellitus  
7 Persistent microalbuminuria associated with type I diabetes mellitus  
8 Dietary education for type I diabetes mellitus  
9 Type I diabetes mellitus poorly controlled  
10 Erectile dysfunction associated with type I diabetes mellitus  
11 Diabetic oculopathy due to type I diabetes mellitus  
12 Peripheral vascular disease due to type I diabetes  
13 Type I diabetes mellitus with persistent proteinuria  
14 Type I diabetes mellitus with peripheral angiopathy  
15 Type I diabetes mellitus with renal complications  
16 Type I diabetes mellitus in remission  
17 Hypoglycemic coma in type I diabetes mellitus  
18 Dietary advice for type I diabetes  
19 Type I diabetes mellitus with diabetic cataract  
20 Type I diabetes mellitus with gangrene  
21 Ketoacidosis in type I diabetes mellitus  
22 Exudative maculopathy associated with type I diabetes mellitus  
23 Disorder associated with type I diabetes mellitus  
24 Type I diabetes mellitus with nephropathy  
25 Type I diabetes mellitus with ulcer  
26 Type I diabetes mellitus with gangrene  
27 Chronic kidney disease stage 3 due to type I diabetes mellitus  
28 Type I diabetes mellitus uncontrolled  
29 Persistent proteinuria associated with type I diabetes mellitus  
30 Gangrene associated with type I diabetes mellitus  
31 Type I diabetes mellitus without complication  
32 Type I diabetes mellitus  
33 Type I diabetes mellitus with hypoglycaemic coma  
34 Referral to type I diabetes structured education programme  
35 Chronic kidney disease stage 4 due to type I diabetes mellitus  
36 Hypoglycaemic coma in type I diabetes mellitus  
37 Diabetic oculopathy associated with type I diabetes mellitus  
38 Labile type I diabetes mellitus  
39 Ketoacidotic coma in type I diabetes mellitus  
40 Type I diabetes mellitus with multiple complications  
41 Type I diabetes mellitus with neuropathic arthropathy  
42 Type I diabetic dietary review  
43 Chronic kidney disease due to type I diabetes mellitus  
44 Neuropathy due to brittle type I diabetes mellitus  
45 Chronic kidney disease stage 1 due to type I diabetes mellitus  
46 Chronic kidney disease stage 5 due to type I diabetes mellitus  
47 Type I diabetes mellitus with retinopathy  
48 Type I diabetes mellitus with gangrene  
49 Mononeuropathy associated with type I diabetes mellitus  
50 Multiple complications of type I diabetes mellitus  
51 Brittle type I diabetes mellitus



1 Type I diabetes mellitus with polyneuropathy  
2 Unstable type I diabetes mellitus  
3 Type I diabetes mellitus  
4 Type I diabetes mellitus maturity onset  
5 Type I diabetes mellitus with neuropathic arthropathy  
6 Type I diabetes mellitus well controlled  
7 Diabetes mellitus type 1  
8 Cataract due to diabetes mellitus type 1  
9 Eating disorder co-occurrent with diabetes mellitus type 1  
10 Skin ulcer of toe due to diabetes mellitus type 1  
11 Diabetes mellitus type 1 with ketoacidotic coma  
12 Diabetes mellitus type 1 without retinopathy  
13 Cataract co-occurrent and due to diabetes mellitus type 1  
14 Retinopathy due to unstable diabetes mellitus type 1  
15 Cataract due to diabetes mellitus type 1  
16 Neuropathy due to unstable diabetes mellitus type 1  
17 Diabetes mellitus type 1 with diabetic Charcot's arthropathy  
18 ED-DMT1 - Eating disorder-diabetes mellitus type 1  
19 Gastroparesis due to diabetes mellitus type I  
20 Polyneuropathy due to diabetes mellitus type I  
21 Diabetes mellitus type I  
22 Diabetes type 1 with gangrene  
23 Diabetes type 1 with ketoacidosis  
24 Diabetes type 1 with hypoglycaemic coma  
25 Diabetes type 1 with hypoglycemic coma  
26 Diabetes type 1 with retinopathy  
27 Diabetes type 1 with neurological disorder  
28 Diabetes type 1 with cataract  
29 Diabetes type 1 with diabetic ulcer of toe, skin breakdown  
30 Diabetes type 1 with small vessel disease  
31 Diabetes type 1 review  
32 Psoriasis geographica  
33 Psoriasis palmaris  
34 Psoriasis universalis  
35 Scalp psoriasis  
36 Other psoriasis  
37 Psoriasis vulgaris & (Chronic large plaque psoriasis)  
38 Exfoliative dermatitis due to psoriasis  
39 Discoid psoriasis  
40 Rupoid psoriasis  
41 Drug-exacerbated psoriasis  
42 Onset of psoriasis in adolescence (10-20 years)  
43 Acute generalized pustular flare of preexisting plaque psoriasis  
44 Early onset psoriasis type 1  
45 Actively extending plaque psoriasis  
46 Photoaggravated psoriasis  
47 Guttate flare of psoriasis with preexisting plaques  
48 Penile psoriasis  
49 Unstable psoriasis  
50 Perianal psoriasis



1  
2 Familial psoriasis with affected first degree relative  
3 Kobner psoriasis  
4 Familial psoriasis without affected first degree relative  
5 Familial psoriasis  
6 Psoriasis  
7  
8 Psoriasis with arthropathy  
9 Plaque psoriasis  
10 Facial psoriasis  
11 Psoriasis of scalp margin  
12 Nummular psoriasis  
13 [X]Other psoriasis  
14 [RFC] Psoriasis  
15 Psoriasis annularis  
16 Anogenital psoriasis  
17 Psoriasis-eczema overlap condition  
18 Chronic small plaque psoriasis  
19 Psoriasis of perianal skin  
20 Vulval psoriasis  
21 Acute generalised pustular flare of preexisting plaque psoriasis  
22 Psoriasis and similar disorders  
23 Chronic large plaque psoriasis  
24 Psoriasis And Eczema  
25 Late onset psoriasis type 2  
26 Generalized psoriasis  
27 Onset of psoriasis in early adulthood (20-40 years)  
28 K bner psoriasis  
29 Psoriasis of nail  
30 Psoriasis of face  
31 Psoriasis and similar disorders NOS  
32 Chronic large plaque psoriasis  
33 Psoriasis of vulva  
34 Chronic stable plaque psoriasis  
35 Psoriasis of penis  
36 Non-pustular psoriasis of hands and feet  
37 Psoriasis vulgaris  
38 Small plaque parapsoriasis  
39 Large plaque parapsoriasis  
40 Eczematized psoriasis  
41 Eczematized psoriasis  
42 Non-pustular psoriasis of hands  
43 Psoriasis and similar disorders  
44 Psoriasis unspecified  
45 Psoriasis gyrata  
46 Psoriasis of anogenital region  
47 Rheumatoid arthritis of cervical spine  
48 Rheumatoid arthritis of sternoclavicular joint  
49 Rheumatoid arthritis of elbow  
50 Rheumatoid arthritis of wrist  
51 Rheumatoid arthritis of subtalar joint  
52 Flare of rheumatoid arthritis

1 Rheumatoid nodule  
2 Rheumatoid lung disease  
3 Delivery of rehabilitation for rheumatoid arthritis  
4 Rheumatoid arthritis monitoring invitation  
5 Rheumatoid arthritis monitoring telephone invitation  
6 Rheumatoid arthritis monitoring verbal invitation  
7 Rheumatoid arthritis monitoring invitation first letter  
8 Rheumatoid arthritis monitoring invitation second letter  
9 Rheumatoid arthritis monitoring invitation third letter  
10 Rheumatoid arthritis monitoring invitation first letter  
11 Rheumatoid arthritis monitoring verbal invitation  
12 Fibrosing alveolitis associated with rheumatoid arthritis  
13 [X]Other seropositive rheumatoid arthritis  
14 [X]Other specified rheumatoid arthritis  
15 [X]Seropositive rheumatoid arthritis, unspecified  
16 Rheumatoid arthritis and other inflammatory polyarthropathy  
17 Rheumatoid arthritis of multiple joints  
18 Rheumatoid pneumoconiosis  
19 Rheumatoid arthritis of first metatarsophalangeal joint  
20 Rheumatoid arthritis of distal radioulnar joint  
21 Seropositive erosive rheumatoid arthritis  
22 Rheumatoid arthritis, leucopenia AND splenomegaly  
23 Rheumatoid arthritis, leukopenia AND splenomegaly  
24 RhA - Rheumatoid arthritis  
25 Rheumatoid arthritis with erosion  
26 Rheumatoid arthritis of right hip  
27 Rheumatoid arthritis of hand  
28 Rheumatoid arthritis of right knee  
29 Deformity of left foot co-occurrent and due to rheumatoid arthritis  
30 Rheumatoid arthritis without erosion  
31 Rheumatoid arthritis of right hand  
32 Rheumatoid episcleritis  
33 Rheumatoid arthritis monitoring invitation by SMS (short message service) text messaging  
34 Erosion of joint surface co-occurrent and due to rheumatoid arthritis  
35 Dilated cardiomyopathy secondary to rheumatoid arthritis  
36 Accelerated rheumatoid nodulosis  
37 Rheumatoid arthritis monitoring invitation email  
38 Necrotizing rheumatoid vasculitis  
39 Rheumatoid arthritis of left hand  
40 Rheumatoid arthritis of hand joint  
41 Rheumatoid arthritis - ankle/foot  
42 Rheumatoid arthritis in remission  
43 Deformity of hand due to rheumatoid arthritis  
44 Rheumatoid arthritis - hand joint  
45 Uveitis-rheumatoid arthritis syndrome  
46 Rheumatoid arthritis of temporomandibular joint  
47 Pericarditis secondary to rheumatoid arthritis  
48 Deformity of right foot co-occurrent and due to rheumatoid arthritis  
49 Rheumatoid arthritis monitoring SMS (short message service) text message first invitation  
50 Rheumatoid nodule

1 Rheumatoid arthritis of left shoulder  
2 Rheumatoid arthritis monitoring SMS (short message service) text message second invitation  
3 Cutaneous atrophy due to rheumatoid arthritis  
4 Rheumatoid arthritis of lesser metatarsophalangeal joint  
5 Rheumatoid arthritis of metacarpophalangeal joint  
6 Rheumatoid arthritis with organ / system involvement  
7 Seropositive erosive rheumatoid arthritis  
8 Rheumatoid fibrosing alveolitis  
9 Rheumatoid arthritis - ankle and/or foot  
10 Rheumatoid bursitis  
11 Cutaneous complication of rheumatoid disease  
12 Rheumatoid neutrophilic dermatitis  
13 Rheumatoid nodulosis  
14 Subcutaneous rheumatoid nodule  
15 Rheumatoid arthritis of tibiofibular joint  
16 Rheumatoid arthritis monitoring invitation third letter  
17 Rheumatoid arthritis with multisystem involvement  
18 Rheumatoid arthritis - multiple joint  
19 Rheumatoid arthritis of ankle  
20 Rheumatoid lung  
21 Deformity of left hand co-occurrent and due to rheumatoid arthritis  
22 Rheumatoid arthritis of interphalangeal joint of toe  
23 Deformity of wrist due to rheumatoid arthritis  
24 Rheumatoid hand deformity  
25 Rheumatoid arteritis  
26 Nailfold rheumatoid vasculitis  
27 Rheumatoid arthritis of left hip  
28 Rheumatoid wrist deformity  
29 Rheumatoid arthritis of foot  
30 RA - Rheumatoid arthritis  
31 Chronic rheumatoid nodular fibrosis  
32 Rheumatoid bursitis  
33 Myopathy due to rheumatoid arthritis  
34 Rheumatoid arthritis  
35 Rheumatoid vasculitis  
36 Seronegative rheumatoid arthritis  
37 Necrotising rheumatoid vasculitis  
38 Pericarditis co-occurrent with extraarticular rheumatoid arthritis  
39 Deformity of right hand co-occurrent and due to rheumatoid arthritis  
40 Rheumatoid arthritis of other tarsal joint  
41 Rheumatoid arthritis of distal radio-ulnar joint  
42 Rheumatoid lung  
43 Rheumatoid arthritis annual review  
44 Rheumatoid arthritis NOS  
45 Polyneuropathy in rheumatoid arthritis  
46 Rheumatoid arthritis of acromioclavicular joint  
47 Rheumatoid arthritis of talonavicular joint  
48 Systemic rheumatoid vasculitis  
49 Deformity of foot due to rheumatoid arthritis  
50 Rheumatoid arthritis of 1st metatarsophalangeal joint

1 Rheumatoid arthritis of spine  
2 Seropositive rheumatoid arthritis  
3 Rheumatoid arthritis of sacroiliac joint  
4 Seropositive rheumatoid arthritis of multiple joints  
5 [X]Rheumatoid arthritis+involvement/other organs or systems  
6 Rheumatoid arthropathy + visceral/systemic involvement NOS  
7 Rheumatoid arthritis monitoring invitation second letter  
8 Rheumatoid myocarditis  
9 Rheumatoid aortitis  
10 Rheumatoid arthritis of right shoulder  
11 Rheumatoid arthritis work instability scale  
12 Rheumatoid lung disease with rheumatoid arthritis  
13 Rheumatoid arthritis monitoring SMS (short message service) text message third invitation  
14 Rheumatoid arthritis of left knee  
15 Diffuse interstitial rheumatoid disease of lung  
16 Rheumatoid arthritis of tibio-fibular joint  
17 Rheumatoid nodule  
18 Rheumatoid arthritis monitoring invitation  
19 Rheumatoid arthritis monitoring telephone invitation  
20 [RFC] Rheumatoid arthritis  
21 Rheumatoid arthritis of shoulder  
22 Rheumatoid arthritis of hip  
23 Rheumatoid arthritis of knee  
24 Rheumatoid arthritis of ankle and/or foot  
25 Rheumatoid arthritis of distal interphalangeal joint of finger  
26 Rheumatoid arthritis of proximal interphalangeal joint of finger  
27 Rheumatoid arthritis monitoring  
28 Felty syndrome  
29 Felty's syndrome  
30 Caplans syndrome  
31 Caplan's syndrome  
32 Caplan's syndrome  
33 Rheum. arth. - other joint  
34 Rheum. arth. - knee joint  
35 Rheum. arth. - hand joint  
36 Rheum. arth. - ankle/foot  
37 Rheum. arth. - knee joint  
38 Rheum. arth. - ankle/foot  
39 Rheum. arth. - hip joint  
40 Rheum. arth. - wrist joint  
41 Rheum. arth. - multiple joint  
42 Rheum. arth. - wrist joint  
43 Rheum. arth. - hand joint  
44 Rheum. arth. - shoulder joint  
45 Rheum. arth. - hip joint  
46 Rheum. arth. - elbow joint  
47 Atrophic arthritis  
48 Chronic rheumatic arthritis  
49 Proliferative arthritis  
50 Disseminated lupus erythematosus

1 Lupus nephritis  
2 Systemic lupus erythematosus encephalitis  
3 Drug-induced systemic lupus erythematosus  
4 Cerebral lupus  
5 Systemic lupus erythematosus encephalitis  
6 Systemic lupus erythematosus NOS  
7 Lupus - tuberculous  
8 Lupus erythematosus NOS  
9 Systemic lupus erythematosus glomerulonephritis syndrome  
10 Systemic lupus erythematosus glomerulonephritis syndrome, World Health Organization class I  
11 Limited lupus erythematosus  
12 Lupus erythematosus and erythema multiforme-like syndrome  
13 Gingival disease co-occurrent and due to lupus erythematosus  
14 Systemic lupus erythematosus glomerulonephritis syndrome, World Health Organization (WHO) class  
15 Systemic lupus erythematosus glomerulonephritis syndrome, World Health Organization class II  
16 Systemic lupus erythematosus glomerulonephritis syndrome, World Health Organization (WHO) class  
17 Systemic lupus erythematosus glomerulonephritis syndrome, World Health Organisation (WHO) class  
18 Lupus vasculitis  
19 Systemic lupus erythematosus glomerulonephritis syndrome, World Health Organization class IV  
20 Lupus nephritis - WHO Class II  
21 Lupus erythematosus-associated nailfold telangiectasia  
22 Lupus erythematosus-associated poikiloderma  
23 Systemic lupus erythematosus glomerulonephritis syndrome, World Health Organisation (WHO) class  
24 Hemolytic anemia associated with systemic lupus erythematosus  
25 Nephrotic syndrome co-occurrent and due to systemic lupus erythematosus  
26 Rash of systemic lupus erythematosus  
27 Lupus erythematosus-associated calcinosis  
28 Haemolytic anaemia associated with systemic lupus erythematosus  
29 Pericarditis co-occurrent and due to systemic lupus erythematosus  
30 Systemic lupus erythematosus glomerulonephritis syndrome, World Health Organization (WHO) class  
31 Skin and joint lupus  
32 Demyelination of central nervous system co-occurrent and due to systemic lupus erythematosus  
33 Chilblain lupus erythematosus  
34 Lupus erythematosus-associated vasculitis  
35 Lupus erythematosus-associated papulonodular mucinosis  
36 Lupus erythematosus of oral mucous membrane  
37 Demyelination with systemic lupus erythematosus  
38 Lupus nephritis - WHO Class IV  
39 Lupus erythematosus-associated urticarial vasculitis  
40 Nephrosis co-occurrent and due to systemic lupus erythematosus  
41 Systemic lupus erythematosus glomerulonephritis syndrome, World Health Organization (WHO) class  
42 Bullous systemic lupus erythematosus  
43 Cheilitis due to lupus erythematosus  
44 Membranous lupus glomerulonephritis  
45 Fulminating systemic lupus erythematosus  
46 Dilated cardiomyopathy secondary to systemic lupus erythematosus  
47 Lupus disease of the lung  
48 Renal tubulo-interstitial disorder in systemic lupus erythematosus  
49 Lupus erythematosus of oral mucosa  
50 Lupus panniculitis

1 Lupus pneumonia  
2 Systemic lupus erythematosus with multisystem involvement  
3 Lupus nephritis - WHO Class VI  
4 Lichen planus with lupus erythematosus  
5 Systemic lupus erythematosus glomerulonephritis syndrome, World Health Organisation (WHO) class  
6 Lupus nephritis - WHO Class I  
7 Lupus erythematosus (LE) cells present  
8 Cerebral systemic lupus erythematosus  
9 [X]Other forms of systemic lupus erythematosus  
10 Chorea with systemic lupus erythematosus  
11 Glomerular disease due to SLE (systemic lupus erythematosus)  
12 Nephrosis with systemic lupus erythematosus  
13 Lupus nephritis - WHO Class V  
14 Secondary autoimmune hemolytic anemia co-occurrent and due to systemic lupus erythematosus  
15 Systemic lupus erythematosus glomerulonephritis syndrome, World Health Organisation (WHO) class  
16 Lupus erythematosus-associated hypermelanosis  
17 Systemic lupus erythematosus glomerulonephritis syndrome, World Health Organization (WHO) class  
18 Glomerular disease due to systemic lupus erythematosus  
19 Nail dystrophy due to lupus erythematosus  
20 Lupus erythematosus overlap syndrome  
21 Lupus cheilitis  
22 Hypermelanosis due to lupus erythematosus  
23 Lupus encephalopathy  
24 Lung disease with systemic lupus erythematosus  
25 Systemic lupus erythematosus  
26 Necrotising vasculitis due to lupus erythematosus  
27 Nephropathy co-occurrent and due to systemic lupus erythematosus  
28 Chorea co-occurrent and due to systemic lupus erythematosus  
29 Endocarditis due to systemic lupus erythematosus  
30 Retinal vasculitis due to systemic lupus erythematosus  
31 Lupus erythematosus-associated anetoderma  
32 Systemic lupus erythematosus glomerulonephritis syndrome, World Health Organization class III  
33 Systemic lupus erythematosus glomerulonephritis syndrome, World Health Organization class VI  
34 Lupus erythematosus-associated necrotizing vasculitis  
35 Lupus with glomerular sclerosis  
36 Urticarial vasculitis due to lupus erythematosus  
37 Lupus nephritis - WHO Class III  
38 Acute systemic lupus erythematosus  
39 Anetoderma secondary to lupus erythematosus  
40 Systemic lupus erythematosus glomerulonephritis syndrome, World Health Organisation (WHO) class  
41 Butterfly rash associated with systemic lupus  
42 Lupus erythematosus-associated necrotising vasculitis  
43 Lupus  
44 Secondary autoimmune haemolytic anaemia co-occurrent and due to systemic lupus erythematosus  
45 Polyneuropathy in disseminated lupus erythematosus  
46 Myopathy due to disseminated lupus erythematosus  
47 Calcinosis secondary to lupus erythematosus  
48 Systemic lupus erythematosus in remission  
49 Systemic lupus erythematosus with organ/system involvement  
50 Systemic lupus erythematosus-associated antiphospholipid syndrome

1 Systemic lupus erythematosus glomerulonephritis syndrome, World Health Organization (WHO) class  
2 Systemic lupus erythematosus/Sjogren's overlap syndrome  
3 Chorea in systemic lupus erythematosus  
4 LE - Lupus erythematosus  
5 Systemic lupus erythematosus with pericarditis  
6 Lupus erythematosus  
7 Vasculitis due to lupus erythematosus  
8 Telangiectasia of nailfolds due to lupus erythematosus  
9 Subcutaneous nodule associated with lupus erythematosus  
10 Lichen planus-lupus erythematosus overlap  
11 Pericarditis secondary to systemic lupus erythematosus  
12 Necrotizing vasculitis due to lupus erythematosus  
13 Systemic lupus erythematosus glomerulonephritis syndrome, World Health Organization class V  
14 SLE - Systemic lupus erythematosus  
15 Nephrotic syndrome in systemic lupus erythematosus  
16 Tuberculosis - lupus NOS  
17 Lupus erythematosus nodularis  
18 Systemic lupus erythematosus arthritis  
19 Lupus hepatitis  
20 Lupus erythematosus-associated nail dystrophy  
21 Systemic lupus erythematosus glomerulonephritis syndrome, World Health Organisation (WHO) class  
22 Poikiloderma due to lupus erythematosus  
23 Linear scleroderma  
24 Myopathy due to scleroderma  
25 Renal involvement in scleroderma  
26 Localised scleroderma  
27 Scleroderma syndrome  
28 Morphoea scleroderma  
29 Systemic scleroderma  
30 Scleroderma lung disease  
31 Diffuse scleroderma  
32 Pericarditis co-occurrent and due to scleroderma  
33 Coup de sabre scleroderma  
34 Scleroderma-associated hypermelanosis  
35 Necrotising vasculitis due to scleroderma  
36 Sclerodermatomyositis  
37 Scleroderma-associated nail dystrophy  
38 Primary biliary cirrhosis co-occurrent with systemic scleroderma  
39 Diffuse cutaneous scleroderma  
40 Scleroderma-associated necrotizing vasculitis  
41 Dilated cardiomyopathy secondary to scleroderma  
42 Glomerulonephritis co-occurrent and due to scleroderma  
43 Scleroderma with multisystem involvement  
44 Localized scleroderma  
45 Circumscribed scleroderma  
46 Generalized scleroderma  
47 Hypothyroidism due to scleroderma  
48 Circumscribed scleroderma, generalised type  
49 Unspecified circumscribed scleroderma  
50 Scleroderma of lung



1 Acute scleroderma renal crisis  
2 Generalised scleroderma  
3 Necrotizing vasculitis due to scleroderma  
4 Scleroderma-associated necrotising vasculitis  
5 Circumscribed scleroderma NOS  
6 Pericarditis secondary to scleroderma  
7 Scleroderma-associated telangiectasia  
8 Scleroderma-associated poikiloderma  
9 Morphea scleroderma  
10 Occupational scleroderma  
11 Scleroderma  
12 Systemic sclerosis sine scleroderma  
13 Polymyositis/scleroderma overlap syndrome  
14 Scleroderma with organ / system involvement  
15 Scleroderma-associated calcinosis  
16 Scleroderma  
17 Scleroderma-associated nailfold telangiectasia  
18 Limited scleroderma  
19 Progressive systemic sclerosis  
20 Limited cutaneous systemic sclerosis  
21 Calcinosis cutis due to systemic sclerosis  
22 Pediatric onset systemic sclerosis  
23 Limited systemic sclerosis  
24 Poikiloderma due to systemic sclerosis  
25 Paediatric onset systemic sclerosis  
26 Telangiectasia of nailfolds due to systemic sclerosis  
27 Hypermelanosis due to systemic sclerosis  
28 Dilated cardiomyopathy due to systemic sclerosis  
29 Diffuse cutaneous systemic sclerosis  
30 PSS - Progressive systemic sclerosis  
31 Lung disease with systemic sclerosis  
32 Pericarditis due to systemic sclerosis  
33 Telangiectasia due to systemic sclerosis  
34 Hypothyroidism due to systemic sclerosis  
35 Cutaneous complication of systemic sclerosis  
36 Myopathy due to systemic sclerosis  
37 [X]Other forms of systemic sclerosis  
38 Nail dystrophy due to systemic sclerosis  
39 Polyneuropathy due to systemic sclerosis  
40 Diffuse systemic sclerosis  
41 SS - Systemic sclerosis  
42 CREST syndrome  
43 Plaque morphea  
44 Guttate morphea  
45 Linear morphea  
46 Morphea en coup de sabre  
47 Subcutaneous morphea  
48 Localized morphea  
49 Morphea, plaque form  
50 Generalized morphea



1 Morphea  
2 Generalised morphea  
3 Morphoea en coup de sabre  
4 Plaque morphoea  
5 Morphoea  
6 Guttate morphoea  
7 Linear morphoea  
8 Localised morphoea  
9 Subcutaneous morphoea  
10 Ulcerative colitis  
11 FH: Ulcerative colitis  
12 Ulcerative (chronic) ileocolitis  
13 Ulcerative proctocolitis NOS  
14 Ulcerative colitis confined to rectum  
15 UC - Ulcerative colitis confined to rectum  
16 Complication due to chronic ulcerative pancolitis  
17 Haemolytic anaemia associated with ulcerative colitis  
18 Ulcerative colitis in remission  
19 Rectal haemorrhage due to chronic ulcerative pancolitis  
20 Mild chronic ulcerative colitis  
21 Chronic ulcerative ileocolitis  
22 Eosinophilic ulcerative colitis  
23 Rectal haemorrhage due to ulcerative colitis  
24 Moderate chronic ulcerative colitis  
25 Severe chronic ulcerative colitis  
26 Fulminant ulcerative colitis  
27 Fistula of intestine due to chronic ulcerative pancolitis  
28 Iritis with ulcerative colitis  
29 Hemolytic anemia associated with ulcerative colitis  
30 Acute ulcerative colitis  
31 Chronic left-sided ulcerative colitis  
32 Secondary autoimmune haemolytic anaemia co-occurrent and due to ulcerative colitis  
33 Left sided ulcerative colitis  
34 Chronic ulcerative pancolitis  
35 Intestinal obstruction due to chronic ulcerative pancolitis  
36 UC - Ulcerative colitis  
37 [RFC] Ulcerative colitis  
38 Exacerbation of ulcerative colitis  
39 Ulcerative pancolitis  
40 Ulcerative ileocolitis  
41 Abscess of intestine co-occurrent and due to ulcerative colitis  
42 Chronic ulcerative enterocolitis  
43 Chronic mild ulcerative colitis  
44 Abscess of intestine co-occurrent and due to chronic ulcerative pancolitis  
45 Ulcerative colitis confined to rectum and sigmoid colon  
46 [X]Other ulcerative colitis  
47 Ulcerative proctocolitis  
48 Complication due to ulcerative colitis  
49 Chronic moderate ulcerative colitis  
50 Ulcerative enterocolitis

1 Intestinal obstruction due to ulcerative colitis  
2  
3 Secondary autoimmune hemolytic anemia co-occurrent and due to ulcerative colitis  
4 Chronic ulcerative colitis  
5 Fistula of intestine due to ulcerative colitis  
6 Ulcerative colitis and/or proctitis  
7  
8 Rectal hemorrhage due to ulcerative colitis  
9 Arthropathy in ulcerative colitis  
10 Toxic megacolon due to ulcerative colitis  
11 Rectal hemorrhage due to chronic ulcerative pancolitis  
12 Ulcerative proctitis  
13  
14 Rectal hemorrhage due to chronic ulcerative proctitis  
15 Nonspecific ulcerative proctitis  
16 Rectal haemorrhage due to chronic ulcerative proctitis  
17 Abscess of intestine co-occurrent and due to chronic ulcerative proctitis  
18 Complication due to chronic ulcerative proctitis  
19 Chronic ulcerative proctitis  
20  
21 Fistula of intestine due to chronic ulcerative proctitis  
22 Intestinal obstruction due to chronic ulcerative proctitis  
23  
24 Chronic ulcerative rectosigmoiditis  
25  
26  
27  
28  
29  
30  
31  
32  
33  
34  
35  
36  
37  
38  
39  
40  
41  
42  
43  
44  
45  
46  
47  
48  
49  
50  
51  
52  
53  
54  
55  
56  
57  
58  
59  
60

1  
2  
3  
4  
5  
6  
7  
8  
9  
10  
11  
12  
13  
14  
15  
16  
17  
18  
19  
20  
21  
22  
23  
24  
25  
26  
27  
28  
29  
30  
31  
32  
33  
34  
35  
36  
37  
38  
39  
40  
41  
42  
43  
44  
45  
46  
47  
48  
49  
50  
51  
52  
53  
54  
55  
56  
57  
58  
59  
60

For peer review only

1  
2  
3  
4  
5  
6  
7  
8  
9  
10  
11  
12  
13  
14  
15  
16  
17  
18  
19  
20  
21  
22  
23  
24  
25  
26  
27  
28  
29  
30  
31  
32  
33  
34  
35  
36  
37  
38  
39  
40  
41  
42  
43  
44  
45  
46  
47  
48  
49  
50  
51  
52  
53  
54  
55  
56  
57  
58  
59  
60

For peer review only

1  
2  
3  
4  
5  
6  
7  
8  
9  
10  
11  
12  
13  
14  
15  
16  
17  
18  
19  
20  
21  
22  
23  
24  
25  
26  
27  
28  
29  
30  
31  
32  
33  
34  
35  
36  
37  
38  
39  
40  
41  
42  
43  
44  
45  
46  
47  
48  
49  
50  
51  
52  
53  
54  
55  
56  
57  
58  
59  
60

For peer review only

1  
2  
3  
4  
5  
6  
7  
8  
9  
10  
11  
12  
13  
14  
15  
16  
17  
18  
19  
20  
21  
22  
23  
24  
25  
26  
27  
28  
29  
30  
31  
32  
33  
34  
35  
36  
37  
38  
39  
40  
41  
42  
43  
44  
45  
46  
47  
48  
49  
50  
51  
52  
53  
54  
55  
56  
57  
58  
59  
60

For peer review only

1  
2  
3  
4  
5  
6  
7  
8  
9  
10  
11  
12  
13  
14  
15  
16  
17  
18  
19  
20  
21  
22  
23  
24  
25  
26  
27  
28  
29  
30  
31  
32  
33  
34  
35  
36  
37  
38  
39  
40  
41  
42  
43  
44  
45  
46  
47  
48  
49  
50  
51  
52  
53  
54  
55  
56  
57  
58  
59  
60

For peer review only

1  
2  
3  
4  
5  
6  
7  
8  
9  
10  
11  
12  
13  
14  
15  
16  
17  
18  
19  
20  
21  
22  
23  
24  
25  
26  
27  
28  
29  
30  
31  
32  
33  
34  
35  
36  
37  
38  
39  
40  
41  
42  
43  
44  
45  
46  
47  
48  
49  
50  
51  
52  
53  
54  
55  
56  
57  
58  
59  
60

For peer review only



1  
2  
3  
4  
5  
6  
7  
8  
9  
10  
11  
12  
13  
14  
15  
16  
17  
18  
19  
20  
21  
22  
23  
24  
25  
26  
27  
28  
29  
30  
31  
32  
33  
34  
35  
36  
37  
38  
39  
40  
41  
42  
43  
44  
45  
46  
47  
48  
49  
50  
51  
52  
53  
54  
55  
56  
57  
58  
59  
60

For peer review only

1  
2  
3  
4  
5  
6  
7  
8  
9  
10  
11  
12  
13  
14  
15  
16  
17  
18  
19  
20  
21  
22  
23  
24  
25  
26  
27  
28  
29  
30  
31  
32  
33  
34  
35  
36  
37  
38  
39  
40  
41  
42  
43  
44  
45  
46  
47  
48  
49  
50  
51  
52  
53  
54  
55  
56  
57  
58  
59  
60

For peer review only

1  
2  
3  
4  
5  
6  
7  
8  
9  
10  
11  
12  
13  
14  
15  
16  
17  
18  
19  
20  
21  
22  
23  
24  
25  
26  
27  
28  
29  
30  
31  
32  
33  
34  
35  
36  
37  
38  
39  
40  
41  
42  
43  
44  
45  
46  
47  
48  
49  
50  
51  
52  
53  
54  
55  
56  
57  
58  
59  
60

IS

For peer review only

1  
2  
3  
4  
5  
6  
7  
8  
9  
10  
11  
12  
13  
14  
15  
16  
17  
18  
19  
20  
21  
22  
23  
24  
25  
26  
27  
28  
29  
30  
31  
32  
33  
34  
35  
36  
37  
38  
39  
40  
41  
42  
43  
44  
45  
46  
47  
48  
49  
50  
51  
52  
53  
54  
55  
56  
57  
58  
59  
60

For peer review only

1  
2  
3  
4  
5  
6  
7  
8  
9  
10  
11  
12  
13  
14  
15  
16  
17  
18  
19  
20  
21  
22  
23  
24  
25  
26  
27  
28  
29  
30  
31  
32  
33  
34  
35  
36  
37  
38  
39  
40  
41  
42  
43  
44  
45  
46  
47  
48  
49  
50  
51  
52  
53  
54  
55  
56  
57  
58  
59  
60

For peer review only

1  
2  
3  
4  
5  
6  
7  
8  
9  
10  
11  
12  
13  
14  
15  
16  
17  
18  
19  
20  
21  
22  
23  
24  
25  
26  
27  
28  
29  
30  
31  
32  
33  
34  
35  
36  
37  
38  
39  
40  
41  
42  
43  
44  
45  
46  
47  
48  
49  
50  
51  
52  
53  
54  
55  
56  
57  
58  
59  
60

For peer review only

1  
2  
3  
4  
5  
6  
7  
8  
9  
10  
11  
12  
13  
14  
15  
16  
17  
18  
19  
20  
21  
22  
23  
24  
25  
26  
27  
28  
29  
30  
31  
32  
33  
34  
35  
36  
37  
38  
39  
40  
41  
42  
43  
44  
45  
46  
47  
48  
49  
50  
51  
52  
53  
54  
55  
56  
57  
58  
59  
60

For peer review only

1  
2  
3  
4  
5  
6  
7  
8  
9  
10  
11  
12  
13  
14  
15  
16  
17  
18  
19  
20  
21  
22  
23  
24  
25  
26  
27  
28  
29  
30  
31  
32  
33  
34  
35  
36  
37  
38  
39  
40  
41  
42  
43  
44  
45  
46  
47  
48  
49  
50  
51  
52  
53  
54  
55  
56  
57  
58  
59  
60

For peer review only



1  
2  
3  
4  
5  
6  
7  
8  
9  
10  
11  
12  
13  
14  
15  
16  
17  
18  
19  
20  
21  
22  
23  
24  
25  
26  
27  
28  
29  
30  
31  
32  
33  
34  
35  
36  
37  
38  
39  
40  
41  
42  
43  
44  
45  
46  
47  
48  
49  
50  
51  
52  
53  
54  
55  
56  
57  
58  
59  
60

For peer review only

1  
2  
3  
4  
5  
6  
7  
8  
9  
10  
11  
12  
13  
14  
15  
16  
17  
18  
19  
20  
21  
22  
23  
24  
25  
26  
27  
28  
29  
30  
31  
32  
33  
34  
35  
36  
37  
38  
39  
40  
41  
42  
43  
44  
45  
46  
47  
48  
49  
50  
51  
52  
53  
54  
55  
56  
57  
58  
59  
60

For peer review only

1  
2  
3  
4  
5  
6  
7  
8  
9  
10  
11  
12  
13  
14  
15  
16  
17  
18  
19  
20  
21  
22  
23  
24  
25  
26  
27  
28  
29  
30  
31  
32  
33  
34  
35  
36  
37  
38  
39  
40  
41  
42  
43  
44  
45  
46  
47  
48  
49  
50  
51  
52  
53  
54  
55  
56  
57  
58  
59  
60

For peer review only

1  
2  
3  
4  
5  
6  
7  
8  
9  
10  
11  
12  
13  
14  
15  
16  
17  
18  
19  
20  
21  
22  
23  
24  
25  
26  
27  
28  
29  
30  
31  
32  
33  
34  
35  
36  
37  
38  
39  
40  
41  
42  
43  
44  
45  
46  
47  
48  
49  
50  
51  
52  
53  
54  
55  
56  
57  
58  
59  
60

For peer review only

1  
2  
3  
4  
5  
6  
7  
8  
9  
10  
11  
12  
13  
14  
15  
16  
17  
18  
19  
20  
21  
22  
23  
24  
25  
26  
27  
28  
29  
30  
31  
32  
33  
34  
35  
36  
37  
38  
39  
40  
41  
42  
43  
44  
45  
46  
47  
48  
49  
50  
51  
52  
53  
54  
55  
56  
57  
58  
59  
60

For peer review only

1  
2  
3  
4  
5  
6  
7  
8  
9  
10  
11  
12  
13  
14  
15  
16  
17  
18  
19  
20  
21  
22  
23  
24  
25  
26  
27  
28  
29  
30  
31  
32  
33  
34  
35  
36  
37  
38  
39  
40  
41  
42  
43  
44  
45  
46  
47  
48  
49  
50  
51  
52  
53  
54  
55  
56  
57  
58  
59  
60

VI

II  
VI

III

IV

III

For peer review only

1  
2  
3  
4  
5  
6  
7  
8  
9  
10  
11  
12  
13  
14  
15  
16  
17  
18  
19  
20  
21  
22  
23  
24  
25  
26  
27  
28  
29  
30  
31  
32  
33  
34  
35  
36  
37  
38  
39  
40  
41  
42  
43  
44  
45  
46  
47  
48  
49  
50  
51  
52  
53  
54  
55  
56  
57  
58  
59  
60

IV

II

I

V

For peer review only

1  
2  
3  
4  
5  
6  
7  
8  
9  
10  
11  
12  
13  
14  
15  
16  
17  
18  
19  
20  
21  
22  
23  
24  
25  
26  
27  
28  
29  
30  
31  
32  
33  
34  
35  
36  
37  
38  
39  
40  
41  
42  
43  
44  
45  
46  
47  
48  
49  
50  
51  
52  
53  
54  
55  
56  
57  
58  
59  
60

V

I

For peer review only



| 1  | ICD-10 code | Term                                                                   |
|----|-------------|------------------------------------------------------------------------|
| 2  |             |                                                                        |
| 3  | D86.0       | Sarcoidosis of lung                                                    |
| 4  | D86.1       | Sarcoidosis of lymph nodes                                             |
| 5  | D86.2       | Sarcoidosis of lung with sarcoidosis of lymph nodes                    |
| 6  | D86.3       | Sarcoidosis of skin                                                    |
| 7  | D86.8       | Sarcoidosis of other sites                                             |
| 8  | D86.81      | Sarcoid meningitis                                                     |
| 9  | D86.82      | Multiple cranial nerve palsies in sarcoidosis                          |
| 10 | D86.83      | Sarcoid iridocyclitis                                                  |
| 11 | D86.84      | Sarcoid pyelonephritis                                                 |
| 12 | D86.85      | Sarcoid myocarditis                                                    |
| 13 | D86.86      | Sarcoid arthropathy                                                    |
| 14 | D86.87      | Sarcoid myositis                                                       |
| 15 | D86.89      | Sarcoidosis of other sites                                             |
| 16 | D86.9       | Sarcoidosis, unspecified                                               |
| 17 | M31.5       | Giant cell arteritis with polymyalgia rheumatica                       |
| 18 | M31.6       | Other giant cell arteritis                                             |
| 19 | M13.0       | Polyarthritis, unspecified                                             |
| 20 | M13.8       | Other specified arthritis                                              |
| 21 | M13.80      | Other specified arthritis - unspecified site                           |
| 22 | M13.81      | Other specified arthritis, shoulder                                    |
| 23 | M13.811     | Other specified arthritis, right shoulder                              |
| 24 | M13.812     | Other specified arthritis, left shoulder                               |
| 25 | M13.819     | Other specified arthritis, unspecified shoulder                        |
| 26 | M13.82      | Other specified arthritis, elbow                                       |
| 27 | M13.821     | Other specified arthritis, right elbow                                 |
| 28 | M13.822     | Other specified arthritis, left elbow                                  |
| 29 | M13.829     | Other specified arthritis, unspecified elbow                           |
| 30 | M13.83      | Other specified arthritis, wrist                                       |
| 31 | M13.831     | Other specified arthritis, right wrist                                 |
| 32 | M13.832     | Other specified arthritis, left wrist                                  |
| 33 | M13.839     | Other specified arthritis, unspecified wrist                           |
| 34 | M13.84      | Other specified arthritis, hand                                        |
| 35 | M13.841     | Other specified arthritis, right hand                                  |
| 36 | M13.842     | Other specified arthritis, left hand                                   |
| 37 | M13.849     | Other specified arthritis, unspecified hand                            |
| 38 | M13.85      | Other specified arthritis, hip                                         |
| 39 | M13.851     | Other specified arthritis, right hip                                   |
| 40 | M13.852     | Other specified arthritis, left hip                                    |
| 41 | M13.859     | Other specified arthritis, unspecified hip                             |
| 42 | M13.86      | Other specified arthritis, knee                                        |
| 43 | M13.861     | Other specified arthritis, right knee                                  |
| 44 | M13.862     | Other specified arthritis, left knee                                   |
| 45 | M13.869     | Other specified arthritis, unspecified knee                            |
| 46 | M13.87      | Other specified arthritis, ankle and foot                              |
| 47 | M13.871     | Other specified arthritis, right ankle and foot                        |
| 48 | M13.872     | Other specified arthritis, left ankle and foot                         |
| 49 | M13.879     | Other specified arthritis, unspecified ankle and foot                  |
| 50 | M13.88      | Other specified arthritis, unspecified ankle and foot - other site     |
| 51 | M13.89      | Other specified arthritis, unspecified ankle and foot - multiple sites |

|    |        |                                                                    |
|----|--------|--------------------------------------------------------------------|
| 1  |        |                                                                    |
| 2  | G35    | Multiple sclerosis                                                 |
| 3  | K75.4  | Autoimmune hepatitis                                               |
| 4  | K71.5  | Toxic liver disease with chronic active hepatitis                  |
| 5  | K50    | Crohn disease [regional enteritis]                                 |
| 6  | K50.0  | Crohn disease of small intestine                                   |
| 7  | K50.1  | Crohn disease of large intestine                                   |
| 8  | K50.8  | Other Crohn disease                                                |
| 9  | K50.9  | Crohn disease, unspecified                                         |
| 10 | E10    | Type 1 diabetes mellitus                                           |
| 11 | E10.0  | Type 1 diabetes mellitus with coma                                 |
| 12 | E10.1  | Type 1 diabetes mellitus with ketoacidosis                         |
| 13 | E10.2  | Type 1 diabetes mellitus with renal complications                  |
| 14 | E10.3  | Type 1 diabetes mellitus with ophthalmic complications             |
| 15 | E10.4  | Type 1 diabetes mellitus with neurological complications           |
| 16 | E10.5  | Type 1 diabetes mellitus with peripheral circulatory complications |
| 17 | E10.6  | Type 1 diabetes mellitus with other specified complications        |
| 18 | E10.7  | Type 1 diabetes mellitus with multiple complications               |
| 19 | E10.8  | Type 1 diabetes mellitus with unspecified complications            |
| 20 | E10.9  | Type 1 diabetes mellitus without complications                     |
| 21 | L40.0  | Psoriasis vulgaris                                                 |
| 22 | L40.5  | Arthropathic psoriasis                                             |
| 23 | M07.0  | Distal interphalangeal psoriatic arthropathy                       |
| 24 | M07.00 | Distal interphalangeal psoriatic arthropathy: Multiple sites       |
| 25 | M07.04 | Distal interphalangeal psoriatic arthropathy: Hand                 |
| 26 | M07.07 | Distal interphalangeal psoriatic arthropathy: Ankle and foot       |
| 27 | M07.09 | Distal interphalangeal psoriatic arthropathy: Site unspecified     |
| 28 | M07.1  | Arthritis mutilans                                                 |
| 29 | M07.10 | Arthritis mutilans: Multiple sites                                 |
| 30 | M07.11 | Arthritis mutilans: Shoulder region                                |
| 31 | M07.12 | Arthritis mutilans: Upper arm                                      |
| 32 | M07.13 | Arthritis mutilans: Forearm                                        |
| 33 | M07.14 | Arthritis mutilans: Hand                                           |
| 34 | M07.15 | Arthritis mutilans: Pelvic region and thigh                        |
| 35 | M07.16 | Arthritis mutilans: Lower leg                                      |
| 36 | M07.17 | Arthritis mutilans: Ankle and foot                                 |
| 37 | M07.18 | Arthritis mutilans: Other                                          |
| 38 | M07.19 | Arthritis mutilans: Site unspecified                               |
| 39 | M07.2  | Psoriatic spondylitis                                              |
| 40 | M07.20 | Psoriatic spondylitis: Multiple sites                              |
| 41 | M07.21 | Psoriatic spondylitis: Shoulder region                             |
| 42 | M07.22 | Psoriatic spondylitis: Upper arm                                   |
| 43 | M07.23 | Psoriatic spondylitis: Forearm                                     |
| 44 | M07.24 | Psoriatic spondylitis: Hand                                        |
| 45 | M07.25 | Psoriatic spondylitis: Pelvic region and thigh                     |
| 46 | M07.26 | Psoriatic spondylitis: Lower leg                                   |
| 47 | M07.27 | Psoriatic spondylitis: Ankle and foot                              |
| 48 | M07.28 | Psoriatic spondylitis: Other                                       |
| 49 | M07.29 | Psoriatic spondylitis: Site unspecified                            |
| 50 | M07.3  | Other psoriatic arthropathies                                      |
| 51 | M07.30 | Other psoriatic arthropathies: Multiple sites                      |

|    |        |                                                          |
|----|--------|----------------------------------------------------------|
| 1  |        |                                                          |
| 2  | M07.31 | Other psoriatic arthropathies: Shoulder region           |
| 3  | M07.32 | Other psoriatic arthropathies: Upper arm                 |
| 4  | M07.33 | Other psoriatic arthropathies: Forearm                   |
| 5  | M07.34 | Other psoriatic arthropathies: Hand                      |
| 6  | M07.35 | Other psoriatic arthropathies: Pelvic region and thigh   |
| 7  | M07.36 | Other psoriatic arthropathies: Lower leg                 |
| 8  | M07.37 | Other psoriatic arthropathies: Ankle and foot            |
| 9  | M07.38 | Other psoriatic arthropathies: Other                     |
| 10 | M07.39 | Other psoriatic arthropathies: Site unspecified          |
| 11 | M45    | Ankylosing spondylitis                                   |
| 12 | M45.0  | Ankylosing spondylitis, Multiple sites in spine          |
| 13 | M45.1  | Ankylosing spondylitis, Occipito-atlanto-axial region    |
| 14 | M45.2  | Ankylosing spondylitis, Cervical region                  |
| 15 | M45.3  | Ankylosing spondylitis, Cervicothoracic region           |
| 16 | M45.4  | Ankylosing spondylitis, Thoracic region                  |
| 17 | M45.5  | Ankylosing spondylitis, Thoracolumbar region             |
| 18 | M45.6  | Ankylosing spondylitis, Lumbar region                    |
| 19 | M45.7  | Ankylosing spondylitis, Lumbosacral region               |
| 20 | M45.8  | Ankylosing spondylitis, Sacral and sacrococcygeal region |
| 21 | M45.9  | Ankylosing spondylitis, Site unspecified                 |
| 22 | M05    | Seropositive rheumatoid arthritis                        |
| 23 | M05.0  | Felty syndrome                                           |
| 24 | M05.00 | Felty syndrome: Multiple sites                           |
| 25 | M05.01 | Felty syndrome: Shoulder region                          |
| 26 | M05.02 | Felty syndrome: Upper arm                                |
| 27 | M05.03 | Felty syndrome: Forearm                                  |
| 28 | M05.04 | Felty syndrome: Hand                                     |
| 29 | M05.05 | Felty syndrome: Pelvic region and thigh                  |
| 30 | M05.06 | Felty syndrome: Lower leg                                |
| 31 | M05.07 | Felty syndrome: Ankle and foot                           |
| 32 | M05.08 | Felty syndrome: Other                                    |
| 33 | M05.09 | Felty syndrome: Site unspecified                         |
| 34 | M05.1  | Rheumatoid lung disease                                  |
| 35 | M05.10 | Rheumatoid lung disease: Multiple sites                  |
| 36 | M05.11 | Rheumatoid lung disease: Shoulder region                 |
| 37 | M05.12 | Rheumatoid lung disease: Upper arm                       |
| 38 | M05.13 | Rheumatoid lung disease: Forearm                         |
| 39 | M05.14 | Rheumatoid lung disease: Hand                            |
| 40 | M05.15 | Rheumatoid lung disease: Pelvic region and thigh         |
| 41 | M05.16 | Rheumatoid lung disease: Lower leg                       |
| 42 | M05.17 | Rheumatoid lung disease: Ankle and foot                  |
| 43 | M05.18 | Rheumatoid lung disease: Other                           |
| 44 | M05.19 | Rheumatoid lung disease: Site unspecified                |
| 45 | M05.2  | Rheumatoid vasculitis                                    |
| 46 | M05.20 | Rheumatoid vasculitis: Multiple sites                    |
| 47 | M05.21 | Rheumatoid vasculitis: Shoulder region                   |
| 48 | M05.22 | Rheumatoid vasculitis: Upper arm                         |
| 49 | M05.23 | Rheumatoid vasculitis: Forearm                           |
| 50 | M05.24 | Rheumatoid vasculitis: Hand                              |
| 51 | M05.25 | Rheumatoid vasculitis: Pelvic region and thigh           |

|    |        |                                                                                            |
|----|--------|--------------------------------------------------------------------------------------------|
| 1  |        |                                                                                            |
| 2  | M05.26 | Rheumatoid vasculitis: Lower leg                                                           |
| 3  | M05.27 | Rheumatoid vasculitis: Ankle and foot                                                      |
| 4  | M05.28 | Rheumatoid vasculitis: Other                                                               |
| 5  | M05.29 | Rheumatoid vasculitis: Site unspecified                                                    |
| 6  | M05.3  | Rheumatoid arthritis with involvement of other organs and systems                          |
| 7  | M05.30 | Rheumatoid arthritis with involvement of other organs and systems: Multiple sites          |
| 8  | M05.31 | Rheumatoid arthritis with involvement of other organs and systems: Shoulder region         |
| 9  | M05.32 | Rheumatoid arthritis with involvement of other organs and systems: Upper arm               |
| 10 | M05.33 | Rheumatoid arthritis with involvement of other organs and systems: Forearm                 |
| 11 | M05.34 | Rheumatoid arthritis with involvement of other organs and systems: Hand                    |
| 12 | M05.35 | Rheumatoid arthritis with involvement of other organs and systems: Pelvic region and thigh |
| 13 | M05.36 | Rheumatoid arthritis with involvement of other organs and systems: Lower leg               |
| 14 | M05.37 | Rheumatoid arthritis with involvement of other organs and systems: Ankle and foot          |
| 15 | M05.38 | Rheumatoid arthritis with involvement of other organs and systems: Other                   |
| 16 | M05.39 | Rheumatoid arthritis with involvement of other organs and systems: Site unspecified        |
| 17 | M05.8  | Other seropositive rheumatoid arthritis                                                    |
| 18 | M05.80 | Other seropositive rheumatoid arthritis: Multiple sites                                    |
| 19 | M05.81 | Other seropositive rheumatoid arthritis: Shoulder region                                   |
| 20 | M05.82 | Other seropositive rheumatoid arthritis: Upper arm                                         |
| 21 | M05.83 | Other seropositive rheumatoid arthritis: Forearm                                           |
| 22 | M05.84 | Other seropositive rheumatoid arthritis: Hand                                              |
| 23 | M05.85 | Other seropositive rheumatoid arthritis: Pelvic region and thigh                           |
| 24 | M05.86 | Other seropositive rheumatoid arthritis: Lower leg                                         |
| 25 | M05.87 | Other seropositive rheumatoid arthritis: Ankle and foot                                    |
| 26 | M05.88 | Other seropositive rheumatoid arthritis: Other                                             |
| 27 | M05.89 | Other seropositive rheumatoid arthritis: Site unspecified                                  |
| 28 | M05.9  | Seropositive rheumatoid arthritis, unspecified                                             |
| 29 | M05.90 | Seropositive rheumatoid arthritis, unspecified: Multiple sites                             |
| 30 | M05.91 | Seropositive rheumatoid arthritis, unspecified: Shoulder region                            |
| 31 | M05.92 | Seropositive rheumatoid arthritis, unspecified: Upper arm                                  |
| 32 | M05.93 | Seropositive rheumatoid arthritis, unspecified: Forearm                                    |
| 33 | M05.94 | Seropositive rheumatoid arthritis, unspecified: Hand                                       |
| 34 | M05.95 | Seropositive rheumatoid arthritis, unspecified: Pelvic region and thigh                    |
| 35 | M05.96 | Seropositive rheumatoid arthritis, unspecified: Lower leg                                  |
| 36 | M05.97 | Seropositive rheumatoid arthritis, unspecified: Ankle and foot                             |
| 37 | M05.98 | Seropositive rheumatoid arthritis, unspecified: Other                                      |
| 38 | M05.99 | Seropositive rheumatoid arthritis, unspecified: Site unspecified                           |
| 39 | M06    | Other rheumatoid arthritis                                                                 |
| 40 | M06.0  | Seronegative rheumatoid arthritis                                                          |
| 41 | M06.00 | Seronegative rheumatoid arthritis: Multiple sites                                          |
| 42 | M06.01 | Seronegative rheumatoid arthritis: Shoulder region                                         |
| 43 | M06.02 | Seronegative rheumatoid arthritis: Upper arm                                               |
| 44 | M06.03 | Seronegative rheumatoid arthritis: Forearm                                                 |
| 45 | M06.04 | Seronegative rheumatoid arthritis: Hand                                                    |
| 46 | M06.05 | Seronegative rheumatoid arthritis: Pelvic region and thigh                                 |
| 47 | M06.06 | Seronegative rheumatoid arthritis: Lower leg                                               |
| 48 | M06.07 | Seronegative rheumatoid arthritis: Ankle and foot                                          |
| 49 | M06.08 | Seronegative rheumatoid arthritis: Other                                                   |
| 50 | M06.09 | Seronegative rheumatoid arthritis: Site unspecified                                        |
| 51 | M06.1  | Adult-onset Still disease                                                                  |

|    |        |                                                               |
|----|--------|---------------------------------------------------------------|
| 1  |        |                                                               |
| 2  | M06.10 | Adult-onset Still disease: Multiple sites                     |
| 3  | M06.11 | Adult-onset Still disease: Shoulder region                    |
| 4  | M06.12 | Adult-onset Still disease: Upper arm                          |
| 5  | M06.13 | Adult-onset Still disease: Forearm                            |
| 6  | M06.14 | Adult-onset Still disease: Hand                               |
| 7  | M06.15 | Adult-onset Still disease: Pelvic region and thigh            |
| 8  | M06.16 | Adult-onset Still disease: Lower leg                          |
| 9  | M06.17 | Adult-onset Still disease: Ankle and foot                     |
| 10 | M06.18 | Adult-onset Still disease: Other                              |
| 11 | M06.19 | Adult-onset Still disease: Site unspecified                   |
| 12 | M06.2  | Rheumatoid bursitis                                           |
| 13 | M06.20 | Rheumatoid bursitis: Multiple sites                           |
| 14 | M06.21 | Rheumatoid bursitis: Shoulder region                          |
| 15 | M06.22 | Rheumatoid bursitis: Upper arm                                |
| 16 | M06.23 | Rheumatoid bursitis: Forearm                                  |
| 17 | M06.24 | Rheumatoid bursitis: Hand                                     |
| 18 | M06.25 | Rheumatoid bursitis: Pelvic region and thigh                  |
| 19 | M06.26 | Rheumatoid bursitis: Lower leg                                |
| 20 | M06.27 | Rheumatoid bursitis: Ankle and foot                           |
| 21 | M06.28 | Rheumatoid bursitis: Other                                    |
| 22 | M06.29 | Rheumatoid bursitis: Site unspecified                         |
| 23 | M06.3  | Rheumatoid nodule                                             |
| 24 | M06.30 | Rheumatoid nodule: Multiple sites                             |
| 25 | M06.31 | Rheumatoid nodule: Shoulder region                            |
| 26 | M06.32 | Rheumatoid nodule: Upper arm                                  |
| 27 | M06.33 | Rheumatoid nodule: Forearm                                    |
| 28 | M06.34 | Rheumatoid nodule: Hand                                       |
| 29 | M06.35 | Rheumatoid nodule: Pelvic region and thigh                    |
| 30 | M06.36 | Rheumatoid nodule: Lower leg                                  |
| 31 | M06.37 | Rheumatoid nodule: Ankle and foot                             |
| 32 | M06.38 | Rheumatoid nodule: Other                                      |
| 33 | M06.39 | Rheumatoid nodule: Site unspecified                           |
| 34 | M06.4  | Inflammatory polyarthropathy                                  |
| 35 | M06.40 | Inflammatory polyarthropathy: Multiple sites                  |
| 36 | M06.41 | Inflammatory polyarthropathy: Shoulder region                 |
| 37 | M06.42 | Inflammatory polyarthropathy: Upper arm                       |
| 38 | M06.43 | Inflammatory polyarthropathy: Forearm                         |
| 39 | M06.44 | Inflammatory polyarthropathy: Hand                            |
| 40 | M06.45 | Inflammatory polyarthropathy: Pelvic region and thigh         |
| 41 | M06.46 | Inflammatory polyarthropathy: Lower leg                       |
| 42 | M06.47 | Inflammatory polyarthropathy: Ankle and foot                  |
| 43 | M06.48 | Inflammatory polyarthropathy: Other                           |
| 44 | M06.49 | Inflammatory polyarthropathy: Site unspecified                |
| 45 | M06.8  | Other specified rheumatoid arthritis                          |
| 46 | M06.80 | Other specified rheumatoid arthritis: Multiple sites          |
| 47 | M06.81 | Other specified rheumatoid arthritis: Shoulder region         |
| 48 | M06.82 | Other specified rheumatoid arthritis: Upper arm               |
| 49 | M06.83 | Other specified rheumatoid arthritis: Forearm                 |
| 50 | M06.84 | Other specified rheumatoid arthritis: Hand                    |
| 51 | M06.85 | Other specified rheumatoid arthritis: Pelvic region and thigh |

|    |        |                                                               |
|----|--------|---------------------------------------------------------------|
| 1  |        |                                                               |
| 2  | M06.86 | Other specified rheumatoid arthritis: Lower leg               |
| 3  | M06.87 | Other specified rheumatoid arthritis: Ankle and foot          |
| 4  | M06.88 | Other specified rheumatoid arthritis: Other                   |
| 5  | M06.89 | Other specified rheumatoid arthritis: Site unspecified        |
| 6  | M06.9  | Rheumatoid arthritis, unspecified                             |
| 7  |        |                                                               |
| 8  | M06.90 | Rheumatoid arthritis, unspecified: Multiple sites             |
| 9  | M06.91 | Rheumatoid arthritis, unspecified: Shoulder region            |
| 10 | M06.92 | Rheumatoid arthritis, unspecified: Upper arm                  |
| 11 | M06.93 | Rheumatoid arthritis, unspecified: Forearm                    |
| 12 |        |                                                               |
| 13 | M06.94 | Rheumatoid arthritis, unspecified: Hand                       |
| 14 | M06.95 | Rheumatoid arthritis, unspecified: Pelvic region and thigh    |
| 15 | M06.96 | Rheumatoid arthritis, unspecified: Lower leg                  |
| 16 | M06.97 | Rheumatoid arthritis, unspecified: Ankle and foot             |
| 17 | M06.98 | Rheumatoid arthritis, unspecified: Other                      |
| 18 |        |                                                               |
| 19 | M06.99 | Rheumatoid arthritis, unspecified: Site unspecified           |
| 20 | M32    | Systemic lupus erythematosus                                  |
| 21 | M32.0  | Drug-induced systemic lupus erythematosus                     |
| 22 | M32.1  | Systemic lupus erythematosus with organ or system involvement |
| 23 |        |                                                               |
| 24 | M32.8  | Other forms of systemic lupus erythematosus                   |
| 25 | M32.9  | Systemic lupus erythematosus, unspecified                     |
| 26 | L93    | Lupus erythematosus                                           |
| 27 | M34    | Systemic sclerosis                                            |
| 28 | M34.0  | Progressive systemic sclerosis                                |
| 29 | M34.1  | CR(E)ST syndrome                                              |
| 30 | M34.2  | Systemic sclerosis induced by drugs and chemicals             |
| 31 |        |                                                               |
| 32 | M34.8  | Other forms of systemic sclerosis                             |
| 33 | M34.9  | Systemic sclerosis, unspecified                               |
| 34 | L94.0  | Localized scleroderma [morphea]                               |
| 35 | L94.1  | Linear scleroderma                                            |
| 36 |        |                                                               |
| 37 | K51    | Ulcerative colitis                                            |
| 38 | K51.0  | Ulcerative (chronic) pancolitis                               |
| 39 | K51.2  | Ulcerative (chronic) proctitis                                |
| 40 | K51.3  | Ulcerative (chronic) rectosigmoiditis                         |
| 41 |        |                                                               |
| 42 | K51.4  | Inflammatory polyps                                           |
| 43 | K51.5  | Left sided colitis                                            |
| 44 | K51.8  | Other ulcerative colitis                                      |
| 45 | K51.9  | Ulcerative colitis, unspecified                               |
| 46 | M07.5  | Arthropathy in ulcerative colitis                             |
| 47 |        |                                                               |
| 48 |        |                                                               |
| 49 |        |                                                               |
| 50 |        |                                                               |
| 51 |        |                                                               |
| 52 |        |                                                               |
| 53 |        |                                                               |
| 54 |        |                                                               |
| 55 |        |                                                               |
| 56 |        |                                                               |
| 57 |        |                                                               |
| 58 |        |                                                               |
| 59 |        |                                                               |
| 60 |        |                                                               |

1  
2  
3  
4  
5  
6  
7  
8  
9  
10  
11  
12  
13  
14  
15  
16  
17  
18  
19  
20  
21  
22  
23  
24  
25  
26  
27  
28  
29  
30  
31  
32  
33  
34  
35  
36  
37  
38  
39  
40  
41  
42  
43  
44  
45  
46  
47  
48  
49  
50  
51  
52  
53  
54  
55  
56  
57  
58  
59  
60

For peer review only

1  
2  
3  
4  
5  
6  
7  
8  
9  
10  
11  
12  
13  
14  
15  
16  
17  
18  
19  
20  
21  
22  
23  
24  
25  
26  
27  
28  
29  
30  
31  
32  
33  
34  
35  
36  
37  
38  
39  
40  
41  
42  
43  
44  
45  
46  
47  
48  
49  
50  
51  
52  
53  
54  
55  
56  
57  
58  
59  
60

For peer review only



1  
2  
3  
4  
5  
6  
7  
8  
9  
10  
11  
12  
13  
14  
15  
16  
17  
18  
19  
20  
21  
22  
23  
24  
25  
26  
27  
28  
29  
30  
31  
32  
33  
34  
35  
36  
37  
38  
39  
40  
41  
42  
43  
44  
45  
46  
47  
48  
49  
50  
51  
52  
53  
54  
55  
56  
57  
58  
59  
60

For peer review only

1  
2  
3  
4  
5  
6  
7  
8  
9  
10  
11  
12  
13  
14  
15  
16  
17  
18  
19  
20  
21  
22  
23  
24  
25  
26  
27  
28  
29  
30  
31  
32  
33  
34  
35  
36  
37  
38  
39  
40  
41  
42  
43  
44  
45  
46  
47  
48  
49  
50  
51  
52  
53  
54  
55  
56  
57  
58  
59  
60

gh

For peer review only

1  
2     Prodcodeid  
3     1636041000033113  
4     1636141000033112  
5     1673741000033119  
6     1673841000033112  
7  
8     9301041000033111  
9     9301141000033110  
10    12203741000033111  
11    12355041000033113  
12    12355141000033112  
13    12377241000033112  
14  
15    390141000033111  
16    390241000033116  
17    390341000033114  
18    395241000033113  
19  
20    523041000033113  
21    10217041000033110  
22    391941000033119  
23    392041000033113  
24    395141000033118  
25  
26    522941000033115  
27    10266941000033113  
28    10267041000033114  
29    10267641000033115  
30    10267741000033112  
31  
32    13810341000033115  
33    13810441000033114  
34    13942341000033116  
35    13942441000033110  
36    11667041000033118  
37    11667141000033119  
38    11667241000033114  
39    11667341000033116  
40  
41    5317941000033110  
42    5318041000033113  
43    5318141000033112  
44    5318441000033116  
45    9301541000033118  
46    9301741000033114  
47    12604241000033117  
48    12604341000033110  
49    5318341000033110  
50    5318241000033117  
51    12390041000033112  
52    12390141000033111  
53    12390241000033116  
54    12390441000033115  
55    12390541000033119  
56    12390741000033110  
57    12390841000033117

For peer review only

1 6445041000033116  
2 6445141000033117  
3 6445241000033112  
4 13751641000033110  
5 2994741000033113  
6 2994841000033115  
7 4042541000033115  
8 4042641000033119  
9 6467741000033115  
10 6467841000033113  
11 11692941000033118  
12 11693041000033111  
13 11693141000033110  
14 11693241000033115  
15 12512241000033119  
16 12512541000033117  
17 12683741000033114  
18 12685541000033117  
19 12712841000033116  
20 12712941000033112  
21 12873041000033113  
22 12873141000033112  
23 12873241000033117  
24 12873341000033110  
25 12873441000033116  
26 12873541000033115  
27 12873641000033119  
28 12873741000033111  
29 13479441000033116  
30 13479841000033118  
31 13480141000033112  
32 13417341000033112  
33 13417441000033118  
34 11781041000033119  
35 11780941000033112  
36 8298941000033110  
37 5325241000033117  
38 2147041000033113  
39 2147141000033112  
40 3290341000033114  
41 3290441000033115  
42 3995941000033115  
43 3996041000033113  
44 3996141000033112  
45 4012441000033113  
46 4012541000033114  
47 5293341000033111  
48 5293541000033116  
49 6515841000033111  
50 6515941000033115

For peer review only

1  
2 11242141000033114  
3 11242241000033119  
4 12346841000033114  
5 12355441000033116  
6 12355541000033115  
7 12355641000033119  
8 12410041000033119  
9 12410141000033115  
10 5989541000033118  
11 5989641000033117  
12 9069241000033119  
13 12378941000033116  
14 12379041000033113  
15 12379141000033112  
16 1916141000033115  
17 1916241000033110  
18 10213341000033118  
19 10229141000033111  
20 11749341000033114  
21 12886741000033110  
22 13443641000033118  
23 13443741000033110  
24 13443841000033117  
25 13443941000033113  
26 4937241000033111  
27 4937341000033118  
28 5706041000033114  
29 5706141000033113  
30 10644841000033118  
31 10644941000033114  
32 11898541000033118  
33 11898641000033117  
34 9301241000033115  
35 9301441000033119  
36 13510241000033112  
37 13510341000033119  
38 13510541000033114  
39 4164341000033119  
40 4164441000033113  
41 8233841000033117  
42 8233941000033113  
43 10358641000033117  
44 10358741000033114  
45 13058741000033112  
46 13058841000033119  
47 13058941000033110  
48 12207541000033111  
49 12207641000033112  
50 12352141000033118  
51 12352241000033113

For peer review only

1 12205341000033114  
2 12205541000033119  
3 12635441000033113  
4 12635541000033114  
5 13426841000033112  
6 13426941000033116  
7 13452341000033115  
8 13452441000033114  
9 13911341000033115  
10 371941000033113  
11 2372541000033113  
12 2372141000033116  
13 369541000033110  
14 372041000033119  
15 372141000033115  
16 372241000033110  
17 418341000033119  
18 430841000033118  
19 431841000033111  
20 431941000033115  
21 859341000033110  
22 3978741000033118  
23 5506241000033117  
24 5900641000033111  
25 5900741000033119  
26 5900841000033112  
27 5900941000033116  
28 6137741000033111  
29 6137841000033118  
30 12398241000033119  
31 12526841000033110  
32 12575941000033114  
33 1601041000033111  
34 1656541000033119  
35 2146441000033119  
36 2146541000033118  
37 3345441000033112  
38 3345541000033113  
39 6512741000033110  
40 8956141000033115  
41 9108241000033115  
42 9122441000033114  
43 9290141000033113  
44 10213841000033110  
45 11072141000033115  
46 11072241000033110  
47 11072341000033117  
48 12389541000033113  
49 13948241000033112  
50 13948341000033119

For peer review only

1  
2 12568941000033112  
3 12568841000033116  
4 12568741000033114  
5 12568641000033117  
6 12389741000033117  
7 12389641000033114  
8 422241000033116  
9 423441000033112  
10 423541000033113  
11 429841000033113  
12 2958641000033119  
13 2760841000033115  
14 2760741000033113  
15 5989241000033115  
16 6062941000033110  
17 9870741000033114  
18 9872041000033112  
19 740241000033111  
20 742241000033110  
21 744541000033116  
22 744641000033115  
23 744741000033112  
24 1830141000033115  
25 2149441000033113  
26 2623741000033116  
27 8141941000033110  
28 8142041000033116  
29 8142141000033117  
30 8142241000033112  
31 12633241000033111  
32 12633341000033118  
33 12633541000033113  
34 12633441000033112  
35 12633641000033114  
36 12633741000033117  
37 12633841000033110  
38 12633941000033119  
39 12890041000033114  
40 13010241000033114  
41 13010341000033116  
42 13897441000033114  
43 13897541000033110  
44 13897641000033111  
45 13915741000033116  
46 13915541000033112  
47 13915841000033114  
48 738041000033118  
49 420641000033117  
50 420741000033114  
51 423141000033116

For peer review only

1  
2 878641000033113  
3 880141000033114  
4 880241000033119  
5 889441000033114  
6 889541000033110  
7 889641000033111  
8 889741000033119  
9 889841000033112  
10 898441000033115  
11 898541000033119  
12 899641000033110  
13 899741000033118  
14 899841000033111  
15 903141000033113  
16 904141000033111  
17 904241000033116  
18 1357541000033112  
19 1361441000033110  
20 1361541000033111  
21 1361641000033112  
22 1361741000033115  
23 879941000033111  
24 879841000033115  
25 880041000033110  
26 887041000033114  
27 886141000033111  
28 431541000033114  
29 431641000033110  
30 1114241000033116  
31 1114341000033114  
32 1126941000033113  
33 1127041000033114  
34 1130741000033110  
35 1131741000033117  
36 1131841000033110  
37 1131941000033119  
38 8494441000033110  
39 8494541000033111  
40 9119141000033118  
41 10212141000033111  
42 10212341000033114  
43 10212441000033115  
44 10212541000033119  
45 10212641000033118  
46 10212741000033110  
47 10212941000033113  
48 10266841000033117  
49 10494341000033117  
50 11507841000033115  
51 11664841000033116

For peer review only



1  
2 13747341000033111  
3 8046741000033113  
4 2918641000033113  
5 2859741000033112  
6 2744441000033118  
7 2710641000033117  
8 2668541000033114  
9 2623541000033112  
10 2612741000033119  
11 2612641000033111  
12 1668541000033113  
13 1129341000033115  
14 1127341000033111  
15 1127141000033113  
16 1126741000033110  
17 1126841000033117  
18 1114941000033113  
19 1114741000033110  
20 1114841000033117  
21 1114641000033118  
22 1113941000033110  
23 1113741000033112  
24 909541000033118  
25 2637441000033119  
26 1119241000033115  
27 1114541000033119  
28 422841000033117  
29 5990141000033115  
30 5990241000033110  
31 5990341000033117  
32 2509541000033113  
33 2509741000033117  
34 2509341000033118  
35 10988941000033111  
36 1115441000033116  
37 1119141000033110  
38 1115041000033113  
39 1128341000033110  
40 1130841000033117  
41 1132041000033113  
42 1132141000033112  
43 220041000033112  
44 234041000033115  
45 946841000033118  
46 2736441000033112  
47 2736541000033113  
48 6035941000033111  
49 6036041000033118  
50 6036241000033114  
51 944841000033112

For peer review only

1  
2 6036341000033116  
3 1779841000033117  
4 1779941000033113  
5 12405341000033113  
6 12405241000033115  
7  
8 3178841000033114  
9 3178741000033116  
10 3178641000033113  
11 3178541000033112  
12  
13 1111741000033113  
14 1111841000033115  
15 1403941000033113  
16 1404041000033110  
17 2099141000033117  
18 2099241000033112  
19  
20 3152241000033110  
21 3216341000033110  
22 4178541000033110  
23 4178641000033111  
24 4178741000033119  
25 4178841000033112  
26 4178941000033116  
27 4179041000033113  
28  
29 5131741000033116  
30 5131841000033114  
31 5413541000033116  
32 5413641000033115  
33 5413741000033112  
34 5413841000033119  
35 5992741000033115  
36 5992841000033113  
37 5992941000033117  
38 5999541000033119  
39 6124541000033111  
40 6124641000033112  
41 6386241000033116  
42 6386141000033111  
43 6386341000033114  
44 6442741000033110  
45 6442841000033117  
46 10209841000033111  
47 10209941000033115  
48 10210141000033110  
49 10210241000033115  
50 10210341000033113  
51 10210541000033118  
52 10253441000033117  
53 10253541000033116  
54 10253741000033112  
55 10253641000033115

For peer review only

1  
2 13317541000033113  
3 13317641000033114  
4 13317741000033117  
5 13317841000033110  
6 13317941000033119  
7  
8 13318041000033116  
9 97241000033118  
10 98641000033119  
11 98741000033111  
12  
13 752841000033111  
14 754441000033119  
15 755441000033115  
16 755741000033110  
17 3050441000033115  
18 3151941000033113  
19 3188041000033113  
20 3216241000033117  
21 5891341000033119  
22 5989441000033119  
23 6066841000033115  
24 8493941000033115  
25 9702441000033111  
26 9852141000033113  
27 98841000033118  
28 755241000033116  
29 902041000033117  
30 1145041000033118  
31 2873741000033112  
32 3134741000033111  
33 3282641000033115  
34 8265941000033118  
35 9158841000033114  
36 10801841000033117  
37 11807941000033110  
38 13146841000033110  
39 870241000033113  
40 870341000033115  
41 878841000033114  
42 879041000033110  
43 879141000033114  
44 879241000033119  
45 879341000033112  
46 879441000033118  
47 900241000033114  
48 902541000033110  
49 2056141000033119  
50 2056241000033114  
51 2668441000033113  
52 2873641000033115  
53 2924041000033115

For peer review only

1  
2 3835441000033114  
3 3836441000033117  
4 3868841000033111  
5 3869641000033118  
6 3869741000033110  
7 3869841000033117  
8 3869941000033113  
9 3870041000033114  
10 3870141000033113  
11 3870241000033118  
12 3870341000033111  
13 3870441000033117  
14 3870541000033116  
15 3906941000033111  
16 4020841000033119  
17 5078841000033112  
18 5079041000033113  
19 5079141000033112  
20 5079241000033117  
21 5079341000033110  
22 5079641000033119  
23 5079741000033111  
24 5079941000033114  
25 5080041000033113  
26 5080141000033112  
27 6037041000033116  
28 6037141000033117  
29 6071841000033115  
30 6377141000033119  
31 6377241000033114  
32 6377341000033116  
33 6380841000033115  
34 6380941000033111  
35 6381041000033118  
36 6381141000033119  
37 6526541000033110  
38 6526641000033111  
39 6526741000033119  
40 6526841000033112  
41 8112741000033111  
42 9290641000033115  
43 9290741000033112  
44 9290841000033119  
45 9290941000033110  
46 9291041000033117  
47 9291141000033118  
48 9291241000033113  
49 9291341000033115  
50 9291441000033114  
51 9291541000033110

For peer review only

1  
2 9291641000033111  
3 9291741000033119  
4 9291841000033112  
5 9291941000033116  
6 9292041000033110  
7 9292141000033114  
8 9292241000033119  
9 9292341000033112  
10 9292441000033118  
11 9292541000033117  
12 10645841000033119  
13 11032541000033114  
14 11032641000033110  
15 11032741000033118  
16 11032841000033111  
17 11032941000033115  
18 11033041000033113  
19 11033141000033112  
20 11033241000033117  
21 11033341000033110  
22 11033541000033115  
23 12189841000033119  
24 12189941000033110  
25 12190141000033118  
26 12190241000033113  
27 12190341000033115  
28 12190441000033114  
29 12190541000033110  
30 12190641000033111  
31 12190741000033119  
32 12190841000033112  
33 12190941000033116  
34 12191041000033114  
35 12191141000033113  
36 12191241000033118  
37 12191341000033111  
38 12191441000033117  
39 12396841000033119  
40 12396941000033110  
41 12397041000033111  
42 12397141000033110  
43 12397241000033115  
44 12397341000033113  
45 12397441000033119  
46 12397541000033118  
47 12397741000033114  
48 12422441000033115  
49 13150141000033115  
50 13150241000033110  
51 13150341000033117

For peer review only

1  
2 13150441000033111  
3 13150541000033112  
4 13150641000033113  
5 13150741000033116  
6 13150841000033114  
7  
8 878941000033118  
9 884741000033118  
10 884841000033111  
11 884941000033115  
12  
13 904041000033112  
14 958341000033114  
15 958441000033115  
16 958541000033119  
17 964241000033115  
18  
19 1221841000033110  
20 1221941000033119  
21 1222041000033113  
22 1247941000033110  
23 1657941000033110  
24 3086941000033119  
25 3087041000033118  
26 3087141000033119  
27 3087241000033114  
28 3087341000033116  
29 3087441000033110  
30 3087541000033111  
31 3156841000033113  
32 3156941000033117  
33 3157041000033116  
34 3157141000033117  
35 4088641000033111  
36 5334641000033116  
37 5334741000033113  
38 5334841000033115  
39 5891641000033110  
40 5891741000033118  
41 5891841000033111  
42 6390741000033112  
43 6390841000033119  
44 6390941000033110  
45 8047741000033110  
46 8180541000033116  
47 9173641000033116  
48 9956441000033114  
49 9956541000033110  
50 9956641000033111  
51 10541841000033110  
52 10541941000033119  
53 10615741000033116  
54 12361841000033113

For peer review only

1  
2 12667741000033116  
3 389641000033114  
4 391041000033115  
5 1242041000033111  
6 1904341000033114  
7 802441000033115  
8 802541000033119  
9  
10 5329841000033116  
11 5329741000033114  
12 1465441000033118  
13 1465341000033112  
14 799741000033115  
15 1459541000033112  
16 1461241000033116  
17 420641000033117  
18 420741000033114  
19 423141000033116  
20 880141000033114  
21 889541000033110  
22 889641000033111  
23 889841000033112  
24 889441000033114  
25 889741000033119  
26 1357541000033112  
27 1361441000033110  
28 1361541000033111  
29 1361641000033112  
30 1361741000033115  
31 880241000033119  
32 878641000033113  
33 879841000033115  
34 879941000033111  
35 880041000033110  
36 886141000033111  
37 887041000033114  
38 131541000033113  
39 131341000033118  
40  
41  
42  
43  
44  
45  
46  
47  
48  
49  
50  
51  
52  
53  
54  
55  
56  
57  
58  
59  
60

For peer review only

1  
2 Term

3 MabThera 100mg/10ml concentrate for solution for infusion vials (Roche Products Ltd)  
4 MabThera 500mg/50ml concentrate for solution for infusion vials (Roche Products Ltd)  
5 Rituximab 100mg/10ml solution for infusion vials  
6 Rituximab 500mg/50ml solution for infusion vials  
7 Rituximab 1.4g/11.7ml solution for injection vials  
8 MabThera 1400mg/11.7ml solution for injection vials (Roche Products Ltd)  
9 Truxima 500mg/50ml concentrate for solution for infusion vials (Napp Pharmaceuticals Ltd)  
10 Rixathon 100mg/10ml concentrate for solution for infusion vials (Sandoz Ltd)  
11 Rixathon 500mg/50ml concentrate for solution for infusion vials (Sandoz Ltd)  
12 Truxima 100mg/10ml concentrate for solution for infusion vials (Napp Pharmaceuticals Ltd)  
13 Cyclophosphamide 1g powder for solution for injection vials  
14 Cyclophosphamide 200mg powder for solution for injection vials  
15 Cyclophosphamide 500mg powder for solution for injection vials  
16 Cyclophosphamide 50mg tablets  
17 Endoxana 50mg tablets (Baxter Healthcare Ltd)  
18 Cyclophosphamide 2g powder for solution for injection vials  
19 Cyclophosphamide Injection  
20 Cyclophosphamide Injection 1.07 g/vial  
21 Cyclophosphamide Tablets 10 mg  
22 Endoxana Tablets 10 mg  
23 Secukinumab 150mg/1ml solution for injection pre-filled syringes  
24 Cosentyx 150mg/1ml solution for injection pre-filled syringes (Novartis Pharmaceuticals UK Ltd)  
25 Secukinumab 150mg/1ml solution for injection pre-filled disposable devices  
26 Cosentyx 150mg/1ml solution for injection pre-filled pens (Novartis Pharmaceuticals UK Ltd)  
27 Secukinumab 300mg/2ml solution for injection pre-filled disposable devices  
28 Cosentyx 300mg/2ml solution for injection pre-filled pens (Novartis Pharmaceuticals UK Ltd)  
29 Secukinumab 75mg/0.5ml solution for injection pre-filled syringes  
30 Cosentyx 75mg/0.5ml solution for injection pre-filled syringes (Novartis Pharmaceuticals UK Ltd)  
31 Ixekizumab 80mg/1ml solution for injection pre-filled syringes  
32 Ixekizumab 80mg/1ml solution for injection pre-filled disposable devices  
33 Taltz 80mg/1ml solution for injection pre-filled syringes (Eli Lilly and Company Ltd)  
34 Taltz 80mg/1ml solution for injection pre-filled pens (Eli Lilly and Company Ltd)  
35 Tocilizumab 200mg/10ml solution for infusion vials  
36 Tocilizumab 400mg/20ml solution for infusion vials  
37 Tocilizumab 80mg/4ml solution for infusion vials  
38 RoActemra 200mg/10ml concentrate for solution for infusion vials (Roche Products Ltd)  
39 Tocilizumab 162mg/0.9ml solution for injection pre-filled syringes  
40 RoActemra 162mg/0.9ml solution for injection pre-filled syringes (Roche Products Ltd)  
41 Tocilizumab 162mg/0.9ml solution for injection pre-filled disposable devices  
42 RoActemra 162mg/0.9ml solution for injection pre-filled pens (Roche Products Ltd)  
43 RoActemra 400mg/20ml concentrate for solution for infusion vials (Roche Products Ltd)  
44 RoActemra 80mg/4ml concentrate for solution for infusion vials (Roche Products Ltd)  
45 Sarilumab 150mg/1.14ml solution for injection pre-filled disposable devices  
46 Sarilumab 150mg/1.14ml solution for injection pre-filled syringes  
47 Sarilumab 200mg/1.14ml solution for injection pre-filled disposable devices  
48 Sarilumab 200mg/1.14ml solution for injection pre-filled syringes  
49 Kevzara 150mg/1.14ml solution for injection pre-filled pens (Sanofi Genzyme)  
50 Kevzara 200mg/1.14ml solution for injection pre-filled pens (Sanofi Genzyme)  
51 Kevzara 200mg/1.14ml solution for injection pre-filled syringes (Sanofi Genzyme)



1 Belimumab 120mg powder for solution for infusion vials  
2 Belimumab 400mg powder for solution for infusion vials  
3 Benlysta 120mg powder for concentrate for solution for infusion vials (GlaxoSmithKline UK Ltd)  
4 Belimumab 200mg/1ml solution for injection pre-filled disposable devices  
5 Adalimumab 40mg/0.8ml solution for injection pre-filled syringes  
6 Humira 40mg/0.8ml solution for injection pre-filled syringes (AbbVie Ltd)  
7 Adalimumab 40mg/0.8ml solution for injection pre-filled disposable devices  
8 Humira 40mg/0.8ml solution for injection pre-filled pens (AbbVie Ltd)  
9 Adalimumab 40mg/0.8ml solution for injection vials  
10 Humira 40mg/0.8ml solution for injection vials (AbbVie Ltd)  
11 Adalimumab 40mg/0.4ml solution for injection pre-filled syringes  
12 Adalimumab 40mg/0.4ml solution for injection pre-filled disposable devices  
13 Humira 40mg/0.4ml solution for injection pre-filled syringes (AbbVie Ltd)  
14 Humira 40mg/0.4ml solution for injection pre-filled pens (AbbVie Ltd)  
15 Adalimumab 20mg/0.2ml solution for injection pre-filled syringes  
16 Humira 20mg/0.2ml solution for injection pre-filled syringes (AbbVie Ltd)  
17 Amgevita 40mg/0.8ml solution for injection pre-filled pens (Amgen Ltd)  
18 Amgevita 40mg/0.8ml solution for injection pre-filled syringes (Amgen Ltd)  
19 Adalimumab 20mg/0.4ml solution for injection pre-filled syringes  
20 Amgevita 20mg/0.4ml solution for injection pre-filled syringes (Amgen Ltd)  
21 Adalimumab 80mg/0.8ml solution for injection pre-filled disposable devices  
22 Adalimumab 80mg/0.8ml solution for injection pre-filled syringes  
23 Humira 80mg/0.8ml solution for injection pre-filled pens (AbbVie Ltd)  
24 Humira 80mg/0.8ml solution for injection pre-filled syringes (AbbVie Ltd)  
25 Hyrimoz 40mg/0.8ml solution for injection pre-filled pens (Sandoz Ltd)  
26 Hyrimoz 40mg/0.8ml solution for injection pre-filled syringes (Sandoz Ltd)  
27 Imraldi 40mg/0.8ml solution for injection pre-filled pens (Biogen Idec Ltd)  
28 Imraldi 40mg/0.8ml solution for injection pre-filled syringes (Biogen Idec Ltd)  
29 Idacio 40mg/0.8ml solution for injection vials (Fresenius Kabi Ltd)  
30 Idacio 40mg/0.8ml solution for injection pre-filled pens (Fresenius Kabi Ltd)  
31 Idacio 40mg/0.8ml solution for injection pre-filled syringes (Fresenius Kabi Ltd)  
32 Certolizumab pegol 200mg/1ml solution for injection cartridges  
33 Cimzia 200mg/1ml solution for injection in a dose-dispenser cartridge (UCB Pharma Ltd)  
34 Cimzia 200mg/1ml solution for injection pre-filled pens (UCB Pharma Ltd)  
35 Certolizumab pegol 200mg/1ml solution for injection pre-filled disposable devices  
36 Certolizumab pegol 200mg/1ml solution for injection pre-filled syringes  
37 Cimzia 200mg/1ml solution for injection pre-filled syringes (UCB Pharma Ltd)  
38 Etanercept 25mg powder and solvent for solution for injection vials  
39 Enbrel 25mg powder and solvent for solution for injection vials (Pfizer Ltd)  
40 Etanercept 50mg powder and solvent for solution for injection vials  
41 Enbrel 50mg powder and solvent for solution for injection vials (Wyeth Pharmaceuticals)  
42 Etanercept 50mg/1ml solution for injection pre-filled syringes  
43 Enbrel 50mg/1ml solution for injection pre-filled syringes (Pfizer Ltd)  
44 Enbrel Paediatric 25mg powder and solvent for solution for injection vials (Pfizer Ltd)  
45 Etanercept 25mg/0.5ml solution for injection pre-filled syringes  
46 Enbrel 25mg/0.5ml solution for injection pre-filled syringes (Pfizer Ltd)  
47 Etanercept 50mg/1ml solution for injection pre-filled disposable devices  
48 Enbrel 50mg/1ml solution for injection pre-filled MyClic pens (Pfizer Ltd)  
49 Etanercept 10mg powder and solvent for solution for injection vials  
50 Enbrel Paediatric 10mg powder and solvent for solution for injection vials (Pfizer Ltd)

1 Benepali 50mg/1ml solution for injection pre-filled pens (Biogen Idec Ltd)  
2 Benepali 50mg/1ml solution for injection pre-filled syringes (Biogen Idec Ltd)  
3 Benepali 25mg/0.5ml solution for injection pre-filled syringes (Biogen Idec Ltd)  
4 Erelzi 25mg/0.5ml solution for injection pre-filled syringes (Sandoz Ltd)  
5 Erelzi 50mg/1ml solution for injection pre-filled syringes (Sandoz Ltd)  
6 Erelzi 50mg/1ml solution for injection pre-filled pens (Sandoz Ltd)  
7 Etanercept 25mg/0.5ml solution for injection pre-filled disposable devices  
8 Enbrel 25mg/0.5ml solution for injection pre-filled MyClic pens (Pfizer Ltd)  
9 Simponi 50mg/0.5ml solution for injection pre-filled syringes (Merck Sharp & Dohme (UK) Ltd)  
10 Simponi 50mg/0.5ml solution for injection pre-filled pens (Merck Sharp & Dohme (UK) Ltd)  
11 Simponi 100mg/1ml solution for injection pre-filled pens (Merck Sharp & Dohme (UK) Ltd)  
12 Golimumab 100mg/1ml solution for injection pre-filled disposable devices  
13 Golimumab 50mg/0.5ml solution for injection pre-filled disposable devices  
14 Golimumab 50mg/0.5ml solution for injection pre-filled syringes  
15 Infliximab 100mg powder for solution for infusion vials  
16 Remicade 100mg powder for concentrate for solution for infusion vials (Merck Sharp & Dohme (UK) Ltd)  
17 Remsima 100mg powder for concentrate for solution for infusion vials (Celltrion Healthcare UK Ltd)  
18 Inflectra 100mg powder for concentrate for solution for infusion vials (Pfizer Ltd)  
19 Flixabi 100mg powder for concentrate for solution for infusion vials (Biogen Idec Ltd)  
20 Zessly 100mg powder for concentrate for solution for infusion vials (Sandoz Ltd)  
21 Infliximab 120mg/1ml solution for injection pre-filled disposable devices  
22 Infliximab 120mg/1ml solution for injection pre-filled syringes  
23 Remsima 120mg/1ml solution for injection pre-filled pens (Celltrion Healthcare UK Ltd)  
24 Remsima 120mg/1ml solution for injection pre-filled syringes (Celltrion Healthcare UK Ltd)  
25 Ustekinumab 45mg/0.5ml solution for injection vials  
26 Stelara 45mg/0.5ml solution for injection vials (Janssen-Cilag Ltd)  
27 Ustekinumab 45mg/0.5ml solution for injection pre-filled syringes  
28 Stelara 45mg/0.5ml solution for injection pre-filled syringes (Janssen-Cilag Ltd)  
29 Ustekinumab 90mg/1ml solution for injection pre-filled syringes  
30 Stelara 90mg/1ml solution for injection pre-filled syringes (Janssen-Cilag Ltd)  
31 Ustekinumab 130mg/26ml solution for infusion vials  
32 Stelara 130mg/26ml concentrate for solution for infusion vials (Janssen-Cilag Ltd)  
33 Vedolizumab 300mg powder for solution for infusion vials  
34 Entyvio 300mg powder for concentrate for solution for infusion vials (Takeda UK Ltd)  
35 Vedolizumab 108mg/0.68ml solution for injection pre-filled syringes  
36 Vedolizumab 108mg/0.68ml solution for injection pre-filled disposable devices  
37 Entyvio 108mg/0.68ml solution for injection pre-filled pens (Takeda UK Ltd)  
38 Abatacept 250mg powder for solution for infusion vials  
39 Orencia 250mg powder for concentrate for solution for infusion vials (Bristol-Myers Squibb Pharmaceuticals Lt)  
40 Abatacept 125mg/1ml solution for injection pre-filled syringes  
41 Orencia 125mg/1ml solution for injection pre-filled syringes (Bristol-Myers Squibb Pharmaceuticals Ltd)  
42 Abatacept 125mg/1ml solution for injection pre-filled disposable devices  
43 Orencia ClickJect 125mg/1ml solution for injection pre-filled pens (Bristol-Myers Squibb Pharmaceuticals Ltd)  
44 Abatacept 50mg/0.4ml solution for injection pre-filled syringes  
45 Abatacept 87.5mg/0.7ml solution for injection pre-filled syringes  
46 Orencia 50mg/0.4ml solution for injection pre-filled syringes (Bristol-Myers Squibb Pharmaceuticals Ltd)  
47 Baricitinib 4mg tablets  
48 Olumiant 4mg tablets (Eli Lilly and Company Ltd)  
49 Baricitinib 2mg tablets  
50 Olumiant 2mg tablets (Eli Lilly and Company Ltd)

1 Tofacitinib 5mg tablets  
2 Xeljanz 5mg tablets (Pfizer Ltd)  
3 Tofacitinib 10mg tablets  
4 Xeljanz 10mg tablets (Pfizer Ltd)  
5 Tofacitinib 11mg modified-release tablets  
6 Xeljanz 11mg modified-release tablets (Pfizer Ltd)  
7 Upadacitinib 15mg modified-release tablets  
8 Rinvoq 15mg modified-release tablets (AbbVie Ltd)  
9 Upadacitinib 30mg modified-release tablets  
10 Cortisone 25mg tablets  
11 \*Cortisone Acetate Pills (Sucrose)  
12 \*Cortisone Acetate Tablets  
13 Cortisone Acetate Tablets 5 mg  
14 Cortisone Tablets 5 mg  
15 Cortistab Tablets 25 mg  
16 Cortistab Tablets 5 mg  
17 Dexamethasone 0.1% eye drops  
18 Decadron 500microgram tablets (Organon Pharma (UK) Ltd)  
19 Dexamethasone 2mg tablets  
20 Dexamethasone 500microgram tablets  
21 Maxidex 0.1% eye drops (Novartis Pharmaceuticals UK Ltd)  
22 Dexamethasone 0.1% eye drops preservative free  
23 Dexamethasone 4mg tablets  
24 Dexamethasone 5mg/5ml oral solution  
25 Dexamethasone 5mg/5ml oral suspension  
26 Dexamethasone 500micrograms/5ml oral solution  
27 Dexamethasone 500micrograms/5ml oral suspension  
28 Dexamethasone 700microgram intravitreal implant with device  
29 Ozurdex 700microgram intravitreal implant in applicator (Allergan Ltd)  
30 Dexamethasone 40mg tablets  
31 Eythalm 1mg/ml eye drops (Aspire Pharma Ltd)  
32 Dexamethasone 8mg tablets  
33 Dexamethasone 0.1% eye drops 0.5ml unit dose preservative free  
34 Minims dexamethasone 0.1% eye drops 0.5ml unit dose (Bausch & Lomb UK Ltd)  
35 Dexsol 2mg/5ml oral solution (Rosemont Pharmaceuticals Ltd)  
36 Dexamethasone 2mg/5ml oral solution sugar free  
37 Dexamethasone 8mg/2ml solution for injection vials  
38 Dexamethasone 4mg/1ml solution for injection ampoules  
39 Martapan 2mg/5ml oral solution (Martindale Pharmaceuticals Ltd)  
40 Dropodex 0.1% eye drops 0.4ml unit dose (Rayner Pharmaceuticals Ltd)  
41 Dexamethasone 0.1% eye drops 0.4ml unit dose preservative free  
42 Dexamethasone 10mg/5ml oral solution sugar free  
43 Dexafree 1mg/1ml eye drops 0.4ml unit dose (Thea Pharmaceuticals Ltd)  
44 Dexamethasone 20mg/5ml oral solution sugar free  
45 Dexamethasone 2mg soluble tablets sugar free  
46 Dexamethasone 4mg soluble tablets sugar free  
47 Dexamethasone 8mg soluble tablets sugar free  
48 Glensoludex 2mg soluble tablets (Glenmark Pharmaceuticals Europe Ltd)  
49 Dexamethasone 10mg soluble tablets sugar free  
50 Dexamethasone 20mg soluble tablets sugar free

1 Dexamethasone (base) 6.6mg/2ml solution for injection vials  
2 Dexamethasone (base) 6.6mg/2ml solution for injection ampoules  
3 Dexamethasone (base) 3.8mg/1ml solution for injection vials  
4 Dexamethasone (base) 3.3mg/1ml solution for injection ampoules  
5 Glensoludex 8mg soluble tablets (Glenmark Pharmaceuticals Europe Ltd)  
6 Glensoludex 4mg soluble tablets (Glenmark Pharmaceuticals Europe Ltd)  
7 Dexamethasone Injection 20 mg/ml  
8 Dexamethasone Injection 4 mg  
9 Dexamethasone Phosphate Injection 4 mg/ml  
10 Dexamethasone Tablets 250 micrograms  
11 Dexamethasone Phosphate Injection 24 mg/ml, 5 ml vial  
12 Dexamethasone Injection 5 mg/ml, 2 ml vial  
13 Dexamethasone Injection 5 mg/ml, 1 ml ampoule  
14 Dexamethasone Solution for injection 3.3 mg/ml, 1 ml ampoule  
15 Dexamethasone Solution for injection 6.6 mg/2 ml vial  
16 Dexamethasone Solution for injection 6.6 mg/2 ml ampoule  
17 Dexamethasone Solution for injection 3.8 mg/1 ml vial  
18 Hydrocortisone 10mg/5ml oral suspension  
19 Hydrocortisone 20mg tablets  
20 Hydrocortisone 10mg tablets  
21 Hydrocortone 10mg tablets (Auden McKenzie (Pharma Division) Ltd)  
22 Hydrocortone 20mg tablets (Auden McKenzie (Pharma Division) Ltd)  
23 Hydrocortisone 5mg/5ml oral suspension  
24 Hydrocortisone 25mg/5ml oral suspension  
25 Hydrocortisone 5mg/5ml oral suspension sugar free  
26 Hydrocortisone 5mg modified-release tablets  
27 Hydrocortisone 20mg modified-release tablets  
28 Plenadren 5mg modified-release tablets (Takeda UK Ltd)  
29 Plenadren 20mg modified-release tablets (Takeda UK Ltd)  
30 Hydrocortisone 500microgram granules in capsules for opening  
31 Hydrocortisone 1mg granules in capsules for opening  
32 Hydrocortisone 5mg granules in capsules for opening  
33 Hydrocortisone 2mg granules in capsules for opening  
34 Alkindi 0.5mg granules in capsules for opening (Diurnal Ltd)  
35 Alkindi 1mg granules in capsules for opening (Diurnal Ltd)  
36 Alkindi 2mg granules in capsules for opening (Diurnal Ltd)  
37 Alkindi 5mg granules in capsules for opening (Diurnal Ltd)  
38 Hydrocortisone 10mg soluble tablets sugar free  
39 Hydventia 10mg tablets (OcXia)  
40 Hydventia 20mg tablets (OcXia)  
41 Hydrocortisone 2.5mg tablets  
42 Hydrocortisone 5mg tablets  
43 Hydrocortisone 15mg tablets  
44 Efmody 5mg modified-release capsules (Diurnal Ltd)  
45 Hydrocortisone 5mg modified-release capsules  
46 Efmody 10mg modified-release capsules (Diurnal Ltd)  
47 Hydrocortisone 2.5mg muco-adhesive buccal tablets sugar free  
48 Depo-Medrone 120mg/3ml suspension for injection vials (Pfizer Ltd)  
49 Depo-Medrone 80mg/2ml suspension for injection vials (Pfizer Ltd)  
50 Depo-Medrone 40mg/1ml suspension for injection vials (Pfizer Ltd)

1 Methylprednisolone acetate 40mg/1ml suspension for injection vials  
2 Methylprednisolone acetate 120mg/3ml suspension for injection vials  
3 Methylprednisolone acetate 80mg/2ml suspension for injection vials  
4 Methylprednisolone sodium succinate 1g powder and solvent for solution for injection vials  
5 Methylprednisolone sodium succinate 125mg powder and solvent for solution for injection vials  
6 Methylprednisolone sodium succinate 2g powder and solvent for solution for injection vials  
7 Methylprednisolone sodium succinate 40mg powder and solvent for solution for injection vials  
8 Methylprednisolone sodium succinate 500mg powder and solvent for solution for injection vials  
9 Medrone 100mg tablets (Pfizer Ltd)  
10 Methylprednisolone 100mg tablets  
11 Medrone 16mg tablets (Pfizer Ltd)  
12 Medrone 2mg tablets (Pfizer Ltd)  
13 Medrone 4mg tablets (Pfizer Ltd)  
14 Methylprednisolone 16mg tablets  
15 Methylprednisolone 2mg tablets  
16 Methylprednisolone 4mg tablets  
17 Solu-Medrone 40mg powder and solvent for solution for injection vials (Pfizer Ltd)  
18 Solu-Medrone 1g powder and solvent for solution for injection vials (Pfizer Ltd)  
19 Solu-Medrone 125mg powder and solvent for solution for injection vials (Pfizer Ltd)  
20 Solu-Medrone 2g powder and solvent for solution for injection vials (Pfizer Ltd)  
21 Solu-Medrone 500mg powder and solvent for solution for injection vials (Pfizer Ltd)  
22 Methylprednisolone Sodium Succinate Injection 125 mg/vial  
23 Methylprednisolone Sodium Succinate Injection 1 gram/vial  
24 Methylprednisolone Sodium Succinate Injection 500 mg/vial  
25 Methylprednisolone Sodium Succinate Injection 40 mg/vial  
26 Methylprednisolone Acetate Injection 10 mg/1 ml  
27 Deltacortril 2.5mg gastro-resistant tablets (Phoenix Labs Ltd)  
28 Deltacortril 5mg gastro-resistant tablets (Phoenix Labs Ltd)  
29 Prednisolone 2.5mg gastro-resistant tablets  
30 Prednisolone 5mg gastro-resistant tablets  
31 Prednema 20mg/100ml long tube (Forest Laboratories UK Ltd)  
32 Prednisolone 20mg/100ml enema long tube  
33 Prednisolone 25mg tablets  
34 Prednisolone 1mg tablets  
35 Prednisolone 2.5mg tablets  
36 Prednisolone 5mg tablets  
37 Dilacort 2.5mg gastro-resistant tablets (Crescent Pharma Ltd)  
38 Dilacort 5mg gastro-resistant tablets (Crescent Pharma Ltd)  
39 Prednisolone 15mg/5ml oral solution  
40 Prednisolone 10mg tablets  
41 Prednisolone 20mg tablets  
42 Pevanti 2.5mg tablets (Advanz Pharma)  
43 Pevanti 5mg tablets (Advanz Pharma)  
44 Pevanti 10mg tablets (Advanz Pharma)  
45 Pevanti 20mg tablets (Advanz Pharma)  
46 Pevanti 25mg tablets (Advanz Pharma)  
47 Prednisolone 5mg/5ml oral solution unit dose  
48 Prednisolone 10mg/ml oral solution sugar free  
49 Prednisolone 1mg gastro-resistant tablets  
50 Prednisolone 30mg tablets  
51  
52  
53  
54  
55  
56  
57  
58  
59  
60



1 Prednisolone sodium phosphate 5mg suppositories (Imported)  
2 Prednisolone sodium phosphate 5mg suppositories  
3 Prednisolone sodium phosphate 0.5% eye drops 0.5ml unit dose preservative free  
4 Prednisolone sodium phosphate 0.003% eye drops  
5 Prednisolone sodium phosphate 0.03% eye drops  
6 Prednisolone sodium phosphate 0.125% eye drops preservative free  
7 Prednisolone sodium phosphate 0.1% eye drops  
8 Prednisolone sodium phosphate 0.3% eye drops  
9 Prednisolone sodium phosphate 1% eye drops preservative free  
10 Prednisolone sodium phosphate 0.5% eye drops preservative free  
11 Prednisolone sodium phosphate 0.05% eye drops  
12 Predsol 5mg suppositories (Focus Pharmaceuticals Ltd)  
13 Prednisolone 5mg soluble tablets  
14 Predenema 20mg/100ml standard tube (Forest Laboratories UK Ltd)  
15 Prednisolone 20mg/100ml rectal solution  
16 Predsol 20mg/100ml retention enema (RPH Pharmaceuticals AB)  
17 Prednisolone sodium phosphate 0.03% eye drops preservative free  
18 Prednisolone sodium phosphate 0.1% eye drops preservative free  
19 Prednisolone sodium phosphate 0.3% eye drops preservative free  
20 Prednisolone sodium phosphate 0.01% eye drops  
21 Prednisolone sodium phosphate 0.5% ear/eye drops  
22 Predsol 0.5% ear/eye drops (RPH Pharmaceuticals AB)  
23 Minims prednisolone sodium phosphate 0.5% eye drops 0.5ml unit dose (Bausch & Lomb UK Ltd)  
24 Prednisolone acetate 1% eye drops  
25 Prednisolone 25mg/1ml suspension for injection ampoules  
26 Pred Forte 1% eye drops (Allergan Ltd)  
27 Deltastab 25mg/1ml suspension for injection ampoules (Advanz Pharma)  
28 Prednisone 1mg modified-release tablets  
29 Prednisone 2mg modified-release tablets  
30 Prednisone 5mg modified-release tablets  
31 \*Prednisolone Liquid  
32 \*Prednisolone Pills (Sucrose)  
33 \*Prednisolone Tablets  
34 Prednisolone Dompe Oral solution 5 mg/5 ml unit dose  
35 Prednisolone Eye drops 1 %  
36 Prednisolone Injection 16 mg/ml  
37 Prednisolone Sodium Phosphate Eye drops 0.5 %  
38 Prednisolone Suppositories 5 mg  
39 Prednisolone Steaglate Tablets 6.65 mg  
40 Prednisone Tablets 1 mg  
41 Prednisone Tablets 5 mg  
42 CellCept 250mg capsules (Roche Products Ltd)  
43 CellCept 500mg tablets (Roche Products Ltd)  
44 Mycophenolate mofetil 500mg tablets  
45 Mycophenolate mofetil 1g/5ml oral suspension sugar free  
46 CellCept 1g/5ml oral suspension (Roche Products Ltd)  
47 Arzip 250mg capsules (Zentiva Pharma UK Ltd)  
48 Arzip 500mg tablets (Zentiva Pharma UK Ltd)  
49 Myfenax 250mg capsules (Teva UK Ltd)  
50 Mycophenolate mofetil 250mg capsules

1 Myfenax 500mg tablets (Teva UK Ltd)  
2 Mycophenolate mofetil 500mg powder for solution for infusion vials  
3 CellCept 500mg powder for solution for infusion vials (Roche Products Ltd)  
4 Ceptava 360mg gastro-resistant tablets (Sandoz Ltd)  
5 Ceptava 180mg gastro-resistant tablets (Sandoz Ltd)  
6 Myfortic 360mg gastro-resistant tablets (Novartis Pharmaceuticals UK Ltd)  
7 Myfortic 180mg gastro-resistant tablets (Novartis Pharmaceuticals UK Ltd)  
8 Mycophenolic acid 360mg gastro-resistant tablets  
9 Mycophenolic acid 180mg gastro-resistant tablets  
10 Prograf 1mg capsules (Astellas Pharma Ltd)  
11 Prograf 5mg capsules (Astellas Pharma Ltd)  
12 Tacrolimus 1mg capsules  
13 Tacrolimus 5mg capsules  
14 Tacrolimus 500microgram capsules  
15 Prograf 500microgram capsules (Astellas Pharma Ltd)  
16 Tacrolimus 5mg/5ml oral suspension  
17 Tacrolimus 2.5mg/5ml oral suspension  
18 Tacrolimus 500microgram modified-release capsules  
19 Tacrolimus 1mg modified-release capsules  
20 Tacrolimus 5mg modified-release capsules  
21 Advagraf 0.5mg modified-release capsules (Astellas Pharma Ltd)  
22 Advagraf 1mg modified-release capsules (Astellas Pharma Ltd)  
23 Advagraf 5mg modified-release capsules (Astellas Pharma Ltd)  
24 Tacrolimus 3mg modified-release capsules  
25 Advagraf 3mg modified-release capsules (Astellas Pharma Ltd)  
26 Tacrolimus 200microgram granules sachets sugar free  
27 Tacrolimus 1mg granules sachets sugar free  
28 Modigraf 0.2mg granules sachets (Astellas Pharma Ltd)  
29 Modigraf 1mg granules sachets (Astellas Pharma Ltd)  
30 Adoport 0.5mg capsules (Sandoz Ltd)  
31 Adoport 1mg capsules (Sandoz Ltd)  
32 Adoport 5mg capsules (Sandoz Ltd)  
33 Tacrolimus 2.5mg/5ml oral solution  
34 Vivadex 1mg capsules (Dexcel-Pharma Ltd)  
35 Vivadex 5mg capsules (Dexcel-Pharma Ltd)  
36 Tacni 1mg capsules (Teva UK Ltd)  
37 Tacni 0.5mg capsules (Teva UK Ltd)  
38 Tacni 5mg capsules (Teva UK Ltd)  
39 Capexion 1mg capsules (Viatris UK Healthcare Ltd)  
40 Capexion 0.5mg capsules (Viatris UK Healthcare Ltd)  
41 Tacrolimus 750microgram modified-release tablets  
42 Tacrolimus 1mg modified-release tablets  
43 Tacrolimus 4mg modified-release tablets  
44 Envarsus 750microgram modified-release tablets (Chiesi Ltd)  
45 Envarsus 1mg modified-release tablets (Chiesi Ltd)  
46 Envarsus 4mg modified-release tablets (Chiesi Ltd)  
47 Tacrolimus 2mg capsules  
48 Tacrolimus 750microgram capsules  
49 Adoport 0.75mg capsules (Sandoz Ltd)  
50 Adoport 2mg capsules (Sandoz Ltd)

1 Tacrolimus 2mg modified-release capsules  
2 Dailiport 0.5mg modified-release capsules (Sandoz Ltd)  
3 Dailiport 1mg modified-release capsules (Sandoz Ltd)  
4 Dailiport 2mg modified-release capsules (Sandoz Ltd)  
5 Dailiport 3mg modified-release capsules (Sandoz Ltd)  
6 Dailiport 5mg modified-release capsules (Sandoz Ltd)  
7 Azathioprine 50mg powder for solution for injection vials  
8 Azathioprine 25mg tablets  
9 Azathioprine 50mg tablets  
10 Imuran 50mg powder for solution for injection vials (Aspen Pharma Trading Ltd)  
11 Imuran 50mg tablets (Aspen Pharma Trading Ltd)  
12 Imuran 25mg tablets (Aspen Pharma Trading Ltd)  
13 Immunoprin 50mg tablets (Ashbourne Pharmaceuticals Ltd)  
14 Azathioprine 20mg/5ml oral suspension  
15 Azathioprine 50mg/5ml oral suspension  
16 Azathioprine 10mg capsules  
17 Azathioprine 25mg/5ml oral suspension  
18 Azathioprine 50mg/5ml oral solution  
19 Azathioprine 100mg/5ml oral suspension  
20 Azathioprine 30mg/5ml oral suspension  
21 Azathioprine 250mg/5ml oral solution  
22 Azapress 50mg tablets (Ennogen Pharma Ltd)  
23 Azathioprine 75mg/5ml oral suspension  
24 Azathioprine Tablets 10 mg  
25 Imuran Tablets 10 mg  
26 Mercaptopurine 50mg tablets  
27 Puri-Nethol 50mg tablets (Aspen Pharma Trading Ltd)  
28 Mercaptopurine 50mg/5ml oral suspension  
29 Mercaptopurine 20mg/ml oral suspension  
30 Mercaptopurine 10mg capsules  
31 Xaluprine 20mg/ml oral suspension (Nova Laboratories Ltd)  
32 Mercaptopurine 10mg tablets  
33 Mercaptopurine 75mg tablets  
34 Mercaptopurine 25mg tablets  
35 Hanixol 50mg tablets (Fontus Health Ltd)  
36 Maxtrex 10mg tablets (Pfizer Ltd)  
37 Maxtrex 2.5mg tablets (Pfizer Ltd)  
38 Methotrexate 1g/40ml solution for injection vials  
39 Methotrexate 200mg/8ml solution for injection vials  
40 Methotrexate 5g/200ml solution for infusion vials  
41 Methotrexate 5mg/2ml solution for injection vials  
42 Methotrexate 50mg/2ml solution for injection vials  
43 Methotrexate 500mg/20ml solution for injection vials  
44 Methotrexate 2.5mg tablets  
45 Methotrexate 10mg tablets  
46 Methotrexate 1g/10ml solution for injection vials  
47 Methotrexate 5g/50ml solution for infusion vials  
48 Methotrexate 2.5mg/5ml oral suspension  
49 Methotrexate 15mg/5ml oral solution  
50 Methotrexate 10mg/5ml oral solution



1 Methotrexate 25mg/1ml solution for injection pre-filled syringes  
2 Methotrexate 10mg/5ml oral suspension  
3 Methotrexate 7.5mg/5ml oral suspension  
4 Methotrexate 7.5mg/0.75ml solution for injection pre-filled syringes  
5 Methotrexate 10mg/1ml solution for injection pre-filled syringes  
6 Methotrexate 15mg/1.5ml solution for injection pre-filled syringes  
7 Methotrexate 20mg/2ml solution for injection pre-filled syringes  
8 Methotrexate 25mg/2.5ml solution for injection pre-filled syringes  
9 Metoject 7.5mg/0.75ml solution for injection pre-filled syringes (medac UK)  
10 Metoject 10mg/1ml solution for injection pre-filled syringes (medac UK)  
11 Metoject 15mg/1.5ml solution for injection pre-filled syringes (medac UK)  
12 Metoject 20mg/2ml solution for injection pre-filled syringes (medac UK)  
13 Metoject 25mg/2.5ml solution for injection pre-filled syringes (medac UK)  
14 Methotrexate 15mg/0.6ml solution for injection pre-filled syringes  
15 Methotrexate 12.5mg/0.5ml solution for injection pre-filled syringes  
16 Methotrexate 7.5mg/0.15ml solution for injection pre-filled syringes  
17 Methotrexate 10mg/0.2ml solution for injection pre-filled syringes  
18 Methotrexate 15mg/0.3ml solution for injection pre-filled syringes  
19 Methotrexate 20mg/0.4ml solution for injection pre-filled syringes  
20 Methotrexate 25mg/0.5ml solution for injection pre-filled syringes  
21 Metoject 7.5mg/0.15ml solution for injection pre-filled syringes (medac UK)  
22 Metoject 10mg/0.2ml solution for injection pre-filled syringes (medac UK)  
23 Metoject 15mg/0.3ml solution for injection pre-filled syringes (medac UK)  
24 Metoject 20mg/0.4ml solution for injection pre-filled syringes (medac UK)  
25 Metoject 25mg/0.5ml solution for injection pre-filled syringes (medac UK)  
26 Methotrexate 30mg/0.6ml solution for injection pre-filled syringes  
27 Metoject 30mg/0.6ml solution for injection pre-filled syringes (medac UK)  
28 Methotrexate 17.5mg/0.7ml solution for injection pre-filled syringes  
29 Metoject 12.5mg/0.25ml solution for injection pre-filled syringes (medac UK)  
30 Metoject 17.5mg/0.35ml solution for injection pre-filled syringes (medac UK)  
31 Metoject 22.5mg/0.45ml solution for injection pre-filled syringes (medac UK)  
32 Methotrexate 12.5mg/0.25ml solution for injection pre-filled syringes  
33 Methotrexate 17.5mg/0.35ml solution for injection pre-filled syringes  
34 Methotrexate 22.5mg/0.45ml solution for injection pre-filled syringes  
35 Methotrexate 27.5mg/0.55ml solution for injection pre-filled syringes  
36 Methotrexate 20mg/1ml solution for injection pre-filled syringes  
37 Methotrexate 25mg/1.25ml solution for injection pre-filled syringes  
38 Methotrexate 30mg/1.5ml solution for injection pre-filled syringes  
39 Ebetrex 20mg/1ml solution for injection pre-filled syringes (Sandoz Ltd)  
40 Methotrexate 20mg/0.8ml solution for injection pre-filled syringes  
41 Methotrexate 7.5mg/0.15ml solution for injection pre-filled disposable devices  
42 Methotrexate 10mg/0.2ml solution for injection pre-filled disposable devices  
43 Methotrexate 12.5mg/0.25ml solution for injection pre-filled disposable devices  
44 Methotrexate 15mg/0.3ml solution for injection pre-filled disposable devices  
45 Methotrexate 17.5mg/0.35ml solution for injection pre-filled disposable devices  
46 Methotrexate 20mg/0.4ml solution for injection pre-filled disposable devices  
47 Methotrexate 22.5mg/0.45ml solution for injection pre-filled disposable devices  
48 Methotrexate 25mg/0.5ml solution for injection pre-filled disposable devices  
49 Methotrexate 27.5mg/0.55ml solution for injection pre-filled disposable devices  
50 Methotrexate 30mg/0.6ml solution for injection pre-filled disposable devices  
51  
52  
53  
54  
55  
56  
57  
58  
59  
60

1 Metoject PEN 7.5mg/0.15ml solution for injection pre-filled pens (medac UK)  
2 Metoject PEN 10mg/0.2ml solution for injection pre-filled pens (medac UK)  
3 Metoject PEN 12.5mg/0.25ml solution for injection pre-filled pens (medac UK)  
4 Metoject PEN 15mg/0.3ml solution for injection pre-filled pens (medac UK)  
5 Metoject PEN 17.5mg/0.35ml solution for injection pre-filled pens (medac UK)  
6 Metoject PEN 20mg/0.4ml solution for injection pre-filled pens (medac UK)  
7 Metoject PEN 22.5mg/0.45ml solution for injection pre-filled pens (medac UK)  
8 Metoject PEN 25mg/0.5ml solution for injection pre-filled pens (medac UK)  
9 Metoject PEN 27.5mg/0.55ml solution for injection pre-filled pens (medac UK)  
10 Metoject PEN 30mg/0.6ml solution for injection pre-filled pens (medac UK)  
11 Methotrexate 2mg/ml oral solution sugar free  
12 Methotrexate 7.5mg/0.3ml solution for injection pre-filled syringes  
13 Methotrexate 10mg/0.4ml solution for injection pre-filled syringes  
14 Methotrexate 22.5mg/0.9ml solution for injection pre-filled syringes  
15 Zlatal 7.5mg/0.3ml solution for injection pre-filled syringes (Nordic Pharma Ltd)  
16 Zlatal 10mg/0.4ml solution for injection pre-filled syringes (Nordic Pharma Ltd)  
17 Zlatal 12.5mg/0.5ml solution for injection pre-filled syringes (Nordic Pharma Ltd)  
18 Zlatal 15mg/0.6ml solution for injection pre-filled syringes (Nordic Pharma Ltd)  
19 Zlatal 17.5mg/0.7ml solution for injection pre-filled syringes (Nordic Pharma Ltd)  
20 Zlatal 20mg/0.8ml solution for injection pre-filled syringes (Nordic Pharma Ltd)  
21 Zlatal 25mg/1ml solution for injection pre-filled syringes (Nordic Pharma Ltd)  
22 Methotrexate 10mg/0.4ml solution for injection pre-filled disposable devices  
23 Methotrexate 12.5mg/0.5ml solution for injection pre-filled disposable devices  
24 Methotrexate 15mg/0.6ml solution for injection pre-filled disposable devices  
25 Methotrexate 17.5mg/0.7ml solution for injection pre-filled disposable devices  
26 Methotrexate 20mg/0.8ml solution for injection pre-filled disposable devices  
27 Methotrexate 22.5mg/0.9ml solution for injection pre-filled disposable devices  
28 Methotrexate 25mg/1ml solution for injection pre-filled disposable devices  
29 Methotrexate 7.5mg/0.3ml solution for injection pre-filled disposable devices  
30 Nordimet 10mg/0.4ml solution for injection pre-filled pens (Nordic Pharma Ltd)  
31 Nordimet 12.5mg/0.5ml solution for injection pre-filled pens (Nordic Pharma Ltd)  
32 Nordimet 15mg/0.6ml solution for injection pre-filled pens (Nordic Pharma Ltd)  
33 Nordimet 17.5mg/0.7ml solution for injection pre-filled pens (Nordic Pharma Ltd)  
34 Nordimet 20mg/0.8ml solution for injection pre-filled pens (Nordic Pharma Ltd)  
35 Nordimet 22.5mg/0.9ml solution for injection pre-filled pens (Nordic Pharma Ltd)  
36 Nordimet 25mg/1ml solution for injection pre-filled pens (Nordic Pharma Ltd)  
37 Nordimet 7.5mg/0.3ml solution for injection pre-filled pens (Nordic Pharma Ltd)  
38 Methofill 10mg/0.2ml solution for injection pre-filled injector (Accord Healthcare Ltd)  
39 Methofill 12.5mg/0.25ml solution for injection pre-filled injector (Accord Healthcare Ltd)  
40 Methofill 15mg/0.3ml solution for injection pre-filled injector (Accord Healthcare Ltd)  
41 Methofill 17.5mg/0.35ml solution for injection pre-filled injector (Accord Healthcare Ltd)  
42 Methofill 20mg/0.4ml solution for injection pre-filled injector (Accord Healthcare Ltd)  
43 Methofill 22.5mg/0.45ml solution for injection pre-filled injector (Accord Healthcare Ltd)  
44 Methofill 25mg/0.5ml solution for injection pre-filled injector (Accord Healthcare Ltd)  
45 Methofill 27.5mg/0.55ml solution for injection pre-filled injector (Accord Healthcare Ltd)  
46 Methofill 7.5mg/0.15ml solution for injection pre-filled injector (Accord Healthcare Ltd)  
47 Jylamvo 2mg/ml oral solution (Esteve Pharmaceuticals Ltd)  
48 Methofill 7.5mg/0.15ml solution for injection pre-filled syringes (Accord Healthcare Ltd)  
49 Methofill 10mg/0.2ml solution for injection pre-filled syringes (Accord Healthcare Ltd)  
50 Methofill 12.5mg/0.25ml solution for injection pre-filled syringes (Accord Healthcare Ltd)

1 Methofill 15mg/0.3ml solution for injection pre-filled syringes (Accord Healthcare Ltd)  
2 Methofill 17.5mg/0.35ml solution for injection pre-filled syringes (Accord Healthcare Ltd)  
3 Methofill 20mg/0.4ml solution for injection pre-filled syringes (Accord Healthcare Ltd)  
4 Methofill 22.5mg/0.45ml solution for injection pre-filled syringes (Accord Healthcare Ltd)  
5 Methofill 25mg/0.5ml solution for injection pre-filled syringes (Accord Healthcare Ltd)  
6 Methotrexate Injection 100 mg/4 ml  
7 Methotrexate Injection 2.5 mg/1 ml  
8 Methotrexate Injection 25 mg/1 ml  
9 Methotrexate Injection 500 mg/vial  
10 Methotrexate Tablets 25 mg  
11 Neoral 100mg capsules (Novartis Pharmaceuticals UK Ltd)  
12 Neoral 25mg capsules (Novartis Pharmaceuticals UK Ltd)  
13 Neoral 50mg capsules (Novartis Pharmaceuticals UK Ltd)  
14 Neoral 100mg/ml oral solution (Novartis Pharmaceuticals UK Ltd)  
15 Sandimmun 25mg capsules (Novartis Pharmaceuticals UK Ltd)  
16 Sandimmun 100mg capsules (Novartis Pharmaceuticals UK Ltd)  
17 Sandimmun 50mg capsules (Novartis Pharmaceuticals UK Ltd)  
18 Sandimmun 100mg/ml oral solution (Novartis Pharmaceuticals UK Ltd)  
19 Neoral 10mg capsules (Novartis Pharmaceuticals UK Ltd)  
20 Ciclosporin 10mg capsules  
21 Ciclosporin 25mg capsules  
22 Ciclosporin 100mg capsules  
23 Ciclosporin 50mg capsules  
24 Ciclosporin 100mg/ml oral solution sugar free  
25 Ciclosporin 0.2% eye ointment  
26 Ciclosporin 2% eye drops preservative free  
27 Ciclosporin 50mg/1ml solution for infusion ampoules  
28 Ciclosporin 250mg/5ml solution for infusion ampoules  
29 Sandimmun 50mg/1ml concentrate for solution for infusion ampoules (Novartis Pharmaceuticals UK Ltd)  
30 Sandimmun 250mg/5ml concentrate for solution for infusion ampoules (Novartis Pharmaceuticals UK Ltd)  
31 Restasis 0.05% eye drops 0.4ml unit dose (Imported (United States))  
32 Deximune 100mg capsules (Dexcel-Pharma Ltd)  
33 Deximune 50mg capsules (Dexcel-Pharma Ltd)  
34 Deximune 25mg capsules (Dexcel-Pharma Ltd)  
35 Capimune 100mg capsules (Viatris UK Healthcare Ltd)  
36 Capimune 25mg capsules (Viatris UK Healthcare Ltd)  
37 Capimune 50mg capsules (Viatris UK Healthcare Ltd)  
38 Capsorin 25mg capsules (Morningside Healthcare Ltd)  
39 Capsorin 50mg capsules (Morningside Healthcare Ltd)  
40 Capsorin 100mg capsules (Morningside Healthcare Ltd)  
41 Ciclosporin 0.06% eye drops preservative free  
42 Ciclosporin 0.2% eye ointment preservative free  
43 Ciclosporin 0.05% eye drops 0.4ml unit dose preservative free  
44 Vanquoral 100mg capsules (Teva UK Ltd)  
45 Vanquoral 50mg capsules (Teva UK Ltd)  
46 Vanquoral 25mg capsules (Teva UK Ltd)  
47 Ciclosporin 0.1% eye drops 0.3ml unit dose  
48 Ikervis 0.1% eye drops 0.3ml unit dose (Santen UK Ltd)  
49 Vanquoral 10mg capsules (Teva UK Ltd)  
50 Ciclosporin 0.06% eye drops 0.4ml unit dose preservative free

1 Verkazia 0.1% eye drops 0.3ml unit dose (Santen UK Ltd)  
2 Cyclosporin Capsules 25 mg  
3 Cyclosporin Intravenous infusion 50 mg/ml  
4 Sandimmun Intravenous infusion 50 mg/ml  
5 Cyclosporin Sugar-free oral solution 100 mg/ml  
6 Kenalog Intramuscular 40mg/1ml suspension for injection pre-filled syringes (Bristol-Myers Squibb Pharmaceu  
7 Kenalog Intramuscular 80mg/2ml suspension for injection pre-filled syringes (Bristol-Myers Squibb Pharmaceu  
8 Kenalog Intra-articular / Intramuscular 40mg/1ml suspension for injection vials (Bristol-Myers Squibb Pharmac  
9 Triamcinolone acetonide 40mg/1ml suspension for injection vials  
10 Triamcinolone acetonide 80mg/2ml suspension for injection pre-filled syringes  
11 Triamcinolone acetonide 40mg/1ml suspension for injection pre-filled syringes  
12 Kenalog Injection 40 mg/ml  
13 Triamcinolone Acetonide Injection 40 mg/ml  
14 Triamcinolone Acetonide Injection 10 mg/ml  
15 Depo-Medrone 120mg/3ml suspension for injection vials (Pfizer Ltd)  
16 Depo-Medrone 80mg/2ml suspension for injection vials (Pfizer Ltd)  
17 Depo-Medrone 40mg/1ml suspension for injection vials (Pfizer Ltd)  
18 Methylprednisolone acetate 120mg/3ml suspension for injection vials  
19 Methylprednisolone sodium succinate 125mg powder and solvent for solution for injection vials  
20 Methylprednisolone sodium succinate 2g powder and solvent for solution for injection vials  
21 Methylprednisolone sodium succinate 500mg powder and solvent for solution for injection vials  
22 Methylprednisolone sodium succinate 1g powder and solvent for solution for injection vials  
23 Methylprednisolone sodium succinate 40mg powder and solvent for solution for injection vials  
24 Solu-Medrone 40mg powder and solvent for solution for injection vials (Pfizer Ltd)  
25 Solu-Medrone 1g powder and solvent for solution for injection vials (Pfizer Ltd)  
26 Solu-Medrone 125mg powder and solvent for solution for injection vials (Pfizer Ltd)  
27 Solu-Medrone 2g powder and solvent for solution for injection vials (Pfizer Ltd)  
28 Solu-Medrone 500mg powder and solvent for solution for injection vials (Pfizer Ltd)  
29 Methylprednisolone acetate 80mg/2ml suspension for injection vials  
30 Methylprednisolone acetate 40mg/1ml suspension for injection vials  
31 Methylprednisolone Sodium Succinate Injection 1 gram/vial  
32 Methylprednisolone Sodium Succinate Injection 125 mg/vial  
33 Methylprednisolone Sodium Succinate Injection 500 mg/vial  
34 Methylprednisolone Acetate Injection 10 mg/1 ml  
35 Methylprednisolone Sodium Succinate Injection 40 mg/vial  
36 Betamethasone 4mg/1ml solution for injection ampoules  
37 Betnesol 4mg/1ml solution for injection ampoules (Focus Pharmaceuticals Ltd)  
38  
39  
40  
41  
42  
43  
44  
45  
46  
47  
48  
49  
50  
51  
52  
53  
54  
55  
56  
57  
58  
59  
60

1  
2  
3  
4  
5  
6  
7  
8  
9  
10  
11  
12  
13  
14  
15  
16  
17  
18  
19  
20  
21  
22  
23  
24  
25  
26  
27  
28  
29  
30  
31  
32  
33  
34  
35  
36  
37  
38  
39  
40  
41  
42  
43  
44  
45  
46  
47  
48  
49  
50  
51  
52  
53  
54  
55  
56  
57  
58  
59  
60

For peer review only

1  
2  
3  
4  
5  
6  
7  
8  
9  
10  
11  
12  
13  
14  
15  
16  
17  
18  
19  
20  
21  
22  
23  
24  
25  
26  
27  
28  
29  
30  
31  
32  
33  
34  
35  
36  
37  
38  
39  
40  
41  
42  
43  
44  
45  
46  
47  
48  
49  
50  
51  
52  
53  
54  
55  
56  
57  
58  
59  
60

For peer review only

1  
2  
3  
4  
5  
6  
7  
8  
9  
10  
11  
12  
13  
14  
15  
16  
17  
18  
19  
20  
21  
22  
23  
24  
25  
26  
27  
28  
29  
30  
31  
32  
33  
34  
35  
36  
37  
38  
39  
40  
41  
42  
43  
44  
45  
46  
47  
48  
49  
50  
51  
52  
53  
54  
55  
56  
57  
58  
59  
60

For peer review only

1  
2  
3  
4  
5  
6  
7  
8  
9  
10  
11  
12  
13  
14  
15  
16  
17  
18  
19  
20  
21  
22  
23  
24  
25  
26  
27  
28  
29  
30  
31  
32  
33  
34  
35  
36  
37  
38  
39  
40  
41  
42  
43  
44  
45  
46  
47  
48  
49  
50  
51  
52  
53  
54  
55  
56  
57  
58  
59  
60

For peer review only



1  
2  
3  
4  
5  
6  
7  
8  
9  
10  
11  
12  
13  
14  
15  
16  
17  
18  
19  
20  
21  
22  
23  
24  
25  
26  
27  
28  
29  
30  
31  
32  
33  
34  
35  
36  
37  
38  
39  
40  
41  
42  
43  
44  
45  
46  
47  
48  
49  
50  
51  
52  
53  
54  
55  
56  
57  
58  
59  
60

For peer review only

1  
2  
3  
4  
5  
6  
7  
8  
9  
10  
11  
12  
13  
14  
15  
16  
17  
18  
19  
20  
21  
22  
23  
24  
25  
26  
27  
28  
29  
30  
31  
32  
33  
34  
35  
36  
37  
38  
39  
40  
41  
42  
43  
44  
45  
46  
47  
48  
49  
50  
51  
52  
53  
54  
55  
56  
57  
58  
59  
60

For peer review only

1  
2  
3  
4  
5  
6  
7  
8  
9  
10  
11  
12  
13  
14  
15  
16  
17  
18  
19  
20  
21  
22  
23  
24  
25  
26  
27  
28  
29  
30  
31  
32  
33  
34  
35  
36  
37  
38  
39  
40  
41  
42  
43  
44  
45  
46  
47  
48  
49  
50  
51  
52  
53  
54  
55  
56  
57  
58  
59  
60

For peer review only

1  
2  
3  
4  
5  
6  
7  
8  
9  
10  
11  
12  
13  
14  
15  
16  
17  
18  
19  
20  
21  
22  
23  
24  
25  
26  
27  
28  
29  
30  
31  
32  
33  
34  
35  
36  
37  
38  
39  
40  
41  
42  
43  
44  
45  
46  
47  
48  
49  
50  
51  
52  
53  
54  
55  
56  
57  
58  
59  
60

For peer review only

1  
2  
3  
4  
5  
6  
7  
8  
9  
10  
11  
12  
13  
14  
15  
16  
17  
18  
19  
20  
21  
22  
23  
24  
25  
26  
27  
28  
29  
30  
31  
32  
33  
34  
35  
36  
37  
38  
39  
40  
41  
42  
43  
44  
45  
46  
47  
48  
49  
50  
51  
52  
53  
54  
55  
56  
57  
58  
59  
60

For peer review only

1  
2  
3  
4  
5  
6  
7  
8  
9  
10  
11  
12  
13  
14  
15  
16  
17  
18  
19  
20  
21  
22  
23  
24  
25  
26  
27  
28  
29  
30  
31  
32  
33  
34  
35  
36  
37  
38  
39  
40  
41  
42  
43  
44  
45  
46  
47  
48  
49  
50  
51  
52  
53  
54  
55  
56  
57  
58  
59  
60

For peer review only

1  
2  
3  
4  
5  
6  
7  
8  
9  
10  
11  
12  
13  
14  
15  
16  
17  
18  
19  
20  
21  
22  
23  
24  
25  
26  
27  
28  
29  
30  
31  
32  
33  
34  
35  
36  
37  
38  
39  
40  
41  
42  
43  
44  
45  
46  
47  
48  
49  
50  
51  
52  
53  
54  
55  
56  
57  
58  
59  
60

For peer review only

1  
2  
3  
4  
5  
6  
7  
8  
9  
10  
11  
12  
13  
14  
15  
16  
17  
18  
19  
20  
21  
22  
23  
24  
25  
26  
27  
28  
29  
30  
31  
32  
33  
34  
35  
36  
37  
38  
39  
40  
41  
42  
43  
44  
45  
46  
47  
48  
49  
50  
51  
52  
53  
54  
55  
56  
57  
58  
59  
60

For peer review only



1  
2  
3  
4  
5  
6  
7  
8  
9  
10  
11  
12  
13  
14  
15  
16  
17  
18  
19  
20  
21  
22  
23  
24  
25  
26  
27  
28  
29  
30  
31  
32  
33  
34  
35  
36  
37  
38  
39  
40  
41  
42  
43  
44  
45  
46  
47  
48  
49  
50  
51  
52  
53  
54  
55  
56  
57  
58  
59  
60

d)

For peer review only

1  
2 Medcodeid  
3 293362015  
4 293658016  
5 293678012  
6 293740017  
7 398903019  
8 452781013  
9 481559011  
10 484842011  
11 500241011  
12 1216993016  
13 96071000006117  
14 111721000006119  
15 146001000006114  
16 146011000006112  
17 186501000006111  
18 574181000006118  
19 574921000006119  
20 574931000006116  
21 574941000006114  
22 585091000006112  
23 589121000006113  
24 633031000006112  
25 881851000006111  
26 2657551000006119  
27 2870551000006114  
28 2870591000006115  
29 2870611000006114  
30 2870621000006118  
31 3004901000006110  
32 3004921000006117  
33 3838561000006117  
34 3941711000006112  
35 4760811000006112  
36 4760861000006110  
37 5066341000006110  
38 5066531000006111  
39 5067711000006114  
40 7854021000006118  
41 13698071000006117  
42 13698081000006119  
43 13698091000006116  
44 13698101000006110  
45 13698121000006117  
46 13698131000006119  
47 13698141000006112  
48 13698151000006114  
49 13698181000006118  
50 13698201000006117  
51 13698221000006110

For peer review only

1  
2 13698231000006113  
3 13698241000006115  
4 13698251000006118  
5 13698261000006116  
6 13698271000006111  
7  
8 13698281000006114  
9 13698301000006113  
10 13698441000006119  
11 13698461000006115  
12 13698561000006119  
13 13698661000006118  
14  
15 13995991000006110  
16 13996001000006111  
17 3571231000006115  
18 4315091000006117  
19 351428015  
20  
21 2870601000006111  
22 4355901000006116  
23 4760731000006114  
24 4760751000006119  
25 4760771000006112  
26 5066121000006117  
27 5066141000006112  
28 5066171000006116  
29 5066231000006113  
30 5066251000006118  
31 5066271000006111  
32  
33  
34  
35  
36  
37  
38  
39  
40  
41  
42  
43  
44  
45  
46  
47  
48  
49  
50  
51  
52  
53  
54  
55  
56  
57  
58  
59  
60

For peer review only

1 Term  
2 Polyclonal hypergammaglobulinaemia NOS  
3 Hypogammaglobulinaemia  
4 Agammaglobulinaemia NEC  
5 [X]Other common variable immunodeficiencies  
6 Congenital hypogammaglobulinaemia  
7 Agammaglobulinaemia  
8 Common variable immunodeficiency  
9 Severe combined immunodeficiency  
10 Bruton's agammaglobulinaemia  
11 Immunodeficiency with IgM hypergammaglobulinaemia  
12 Transient infant hypogammaglobulinaemia  
13 Swiss type agammaglobulinaemia  
14 Severe combined immunodeficiency with low or normal B-cell numbers  
15 Severe combined immunodeficiency with low T- and B-cell numbers  
16 Recessive agammaglobulinaemia  
17 Common variable immunodeficiency with predominant abnormalities of B-cell numbers and functions  
18 Common variable immunodeficiency with predominant immunoregulatory T-cell disorders  
19 Common variable immunodeficiency with autoantibodies to B- or T-cells  
20 Common variable immunodeficiency  
21 Congenital sex-linked agammaglobulinaemia  
22 X-linked agammaglobulinaemia  
23 Dysgammaglobulinaemia NEC  
24 A/Hypo-gammaglobulinaemia  
25 Good syndrome  
26 Common variable agammaglobulinaemia  
27 CVI - Common variable immunodeficiency  
28 CVID - Common variable immunodeficiency  
29 Acquired hypogammaglobulinaemia  
30 Severe combined immunodeficiency disease  
31 SCID - Severe combined immunodeficiency  
32 Hyper IgM syndrome  
33 Transient hypogammaglobulinaemia of infancy  
34 Autosomal recessive severe combined immunodeficiency  
35 Severe combined immunodeficiency with reticular dysgenesis  
36 Specific antibody deficiency  
37 Warts, hypogammaglobulinaemia, infections, and myelokathexis  
38 Triple X syndrome, epilepsy, and hypogammaglobulinaemia  
39 X-linked immune dysregulation, polyendocrinopathy, enteropathy syndrome  
40 Severe combined immunodeficiency screening test  
41 SCID (severe combined immunodeficiency) screening test  
42 Severe combined immunodeficiency screening declined  
43 SCID (severe combined immunodeficiency) screening declined  
44 Severe combined immunodeficiency screening declined, no history of being screened  
45 SCID (severe combined immunodeficiency) screening declined, no history of being screened  
46 Severe combined immunodeficiency screening declined, screened in UK with no evidence of result  
47 SCID (severe combined immunodeficiency) screening declined, screened in UK with no evidence of res  
48 Severe combined immunodeficiency screening declined, screened outside UK with no evidence of res  
49 Suspected severe combined immunodeficiency  
50 Severe combined immunodeficiency not suspected

1 SCID (severe combined immunodeficiency) not suspected  
2 Severe combined immunodeficiency screening related finding  
3 SCID (severe combined immunodeficiency) screening related finding  
4 Severe combined immunodeficiency not screened for or screening incomplete  
5 SCID (severe combined immunodeficiency) not screened for or screening incomplete  
6 Severe combined immunodeficiency screening, insufficient sample  
7 Severe combined immunodeficiency screening, repeat screening with further sample required  
8 Severe combined immunodeficiency screening, unsuitable sample: date of sample missing  
9 Severe combined immunodeficiency screening, unsuitable sample: date of birth not accurately match  
10 Severe combined immunodeficiency not screened for or screening incomplete: moved out of area  
11 Severe combined immunodeficiency not suspected and other disorders follow up required  
12 Severe combined immunodeficiency not screened for or screening incomplete: not offered  
13 SCID (severe combined immunodeficiency) not screened for or screening incomplete: not offered  
14 X-linked agammaglobulinemia  
15 Hypogammaglobulinemia  
16 Immunoglobulin G4 deficiency  
17 Late onset immunoglobulin deficiency  
18 Immunoglobulin G subclass deficiency  
19 Selective immunoglobulin A deficiency  
20 Selective immunoglobulin M deficiency  
21 Selective immunoglobulin G deficiency  
22 Immunoglobulin subclass deficiency  
23 Immunoglobulin G2 deficiency  
24 Combined immunoglobulin G2 and G4 deficiency  
25 Immunoglobulin G1 deficiency  
26 Immunoglobulin A1 deficiency  
27 Immunoglobulin A2 deficiency  
28  
29  
30  
31  
32  
33  
34  
35  
36  
37  
38  
39  
40  
41  
42  
43  
44  
45  
46  
47  
48  
49  
50  
51  
52  
53  
54  
55  
56  
57  
58  
59  
60

1  
2  
3  
4  
5  
6  
7  
8  
9  
10  
11  
12  
13  
14  
15  
16  
17  
18  
19  
20  
21  
22  
23  
24  
25  
26  
27  
28  
29  
30  
31  
32  
33  
34  
35  
36  
37  
38  
39  
40  
41  
42  
43  
44  
45  
46  
47  
48  
49  
50  
51  
52  
53  
54  
55  
56  
57  
58  
59  
60

;

sult  
ult

For peer review only

1  
2  
3  
4  
5  
6  
7  
8  
9  
10  
11  
12  
13  
14  
15  
16  
17  
18  
19  
20  
21  
22  
23  
24  
25  
26  
27  
28  
29  
30  
31  
32  
33  
34  
35  
36  
37  
38  
39  
40  
41  
42  
43  
44  
45  
46  
47  
48  
49  
50  
51  
52  
53  
54  
55  
56  
57  
58  
59  
60

ed

For peer review only

## ICD-10 code

D83.0  
D83.1  
D83.2  
D83.8  
D83.9  
D80.0  
D80.1  
D80.2  
D80.3  
D80.4  
D80.5  
D80.8  
D80.9  
D81.0  
D81.1  
D81.2  
D82.8  
D82.9  
R77.1

For peer review only



1  
2 Term

3 Common variable immunodeficiency with predominant abnormalities of B-cell numbers and function

4 Common variable immunodeficiency with predominant immunoregulatory T-cell disorders

5 Common variable immunodeficiency with autoantibodies to B- or T-cells

6 Other common variable immunodeficiencies

7  
8 Common variable immunodeficiency, unspecified

9 Hereditary hypogammaglobulinemia

10 Nonfamilial hypogammaglobulinemia

11 Selective deficiency of immunoglobulin A [IgA]

12 Selective deficiency of immunoglobulin G [IgG] subclasses

13 Selective deficiency of immunoglobulin M [IgM]

14 Immunodeficiency with increased immunoglobulin M [IgM]

15 Other immunodeficiencies with predominantly antibody defects

16 Immunodeficiency with predominantly antibody defects, unspecified

17 Severe combined immunodeficiency [SCID] with reticular dysgenesis

18 Severe combined immunodeficiency [SCID] with low T- and B-cell numbers

19 Severe combined immunodeficiency [SCID] with low or normal B-cell numbers

20 Immunodeficiency associated with other specified major defects

21 Immunodeficiency associated with major defect, unspecified

22  
23  
24  
25  
26  
27  
28  
29  
30  
31  
32  
33  
34  
35  
36  
37  
38  
39  
40  
41  
42  
43  
44  
45  
46  
47  
48  
49  
50  
51  
52  
53  
54  
55  
56  
57  
58  
59  
60

1  
2  
3  
4  
5  
6  
7  
8  
9  
10  
11  
12  
13  
14  
15  
16  
17  
18  
19  
20  
21  
22  
23  
24  
25  
26  
27  
28  
29  
30  
31  
32  
33  
34  
35  
36  
37  
38  
39  
40  
41  
42  
43  
44  
45  
46  
47  
48  
49  
50  
51  
52  
53  
54  
55  
56  
57  
58  
59  
60

n

For peer review only

1  
2 Medcodeid  
3 2622348012  
4 496781000006111  
5 496791000006114  
6 1573641000006119  
7 1761401000006113  
8 1762141000006110  
9 1878421000006117  
10 1878451000006114  
11 287024011  
12 287025012  
13 288186011  
14 376571000006116  
15 825711000006111  
16 825861000006116  
17 1741791000006119  
18 389021000006114  
19 6981941000006110  
20 3904981000006111  
21 3994511000006112  
22 1816791000006117  
23 4596341000006119  
24 3289641000006110  
25 7625181000006111  
26 3951401000006118  
27 4278861000006110  
28 6861201000006112  
29 8023761000006116  
30 4090861000006111  
31 6436261000006116  
32 6602001000006116  
33 7501721000006114  
34 7671061000006119  
35 8223161000006113  
36 4090981000006113  
37 7960981000006112  
38 8024301000006115  
39 4279361000006113  
40 4280421000006113  
41 5588881000006111  
42 6054521000006111  
43 6857291000006118  
44 4091031000006116  
45 4256781000006114  
46 3541151018  
47 4091151000006110  
48 11917161000006117  
49 4279381000006115  
50 3527608016  
51 11917171000006112

For peer review only

1  
2 6436301000006113  
3 3527604019  
4 4279111000006112  
5 4279881000006114  
6 4279131000006118  
7 4090841000006112  
8 6972261000006119  
9 4091111000006114  
10 4279701000006113  
11 7631531000006118  
12 8266821000006110  
13 3994531000006118  
14 6716441000006116  
15 6716431000006114  
16 8022741000006110  
17 6436361000006114  
18 7671111000006118  
19 8694421000006118  
20 4091001000006112  
21 3344261000006112  
22 6052951000006116  
23 3533581011  
24 3916471000006110  
25 8266351000006111  
26 3916491000006111  
27 4090921000006114  
28 6436331000006117  
29 6972271000006114  
30 5009911000006118  
31 3533586018  
32 8694341000006117  
33 4279071000006116  
34 4090891000006115  
35 4091011000006110  
36 3527598017  
37 5143461000006113  
38 9325011000006117  
39 4279901000006111  
40 4279861000006116  
41 8022751000006112  
42 4327461000006117  
43 7671051000006116  
44 1814931000006110  
45 8265311000006115  
46 7522091000006110  
47 11989691000006113  
48 825841000006115  
49 825791000006118  
50 389101000006117  
51 1761381000006113  
52  
53  
54  
55  
56  
57  
58  
59  
60

For peer review only

1  
2 458431000033114  
3 8023751000006118  
4 5084731000006113  
5 4091121000006118  
6 4090791000006114  
7 3541148013  
8 4090911000006118  
9 7791061000006117  
10 317670010  
11 4091081000006115  
12 4279031000006119  
13 5650951000006113  
14 7796951000006110  
15 5009921000006114  
16 7796961000006112  
17 4280491000006110  
18 7326211000006113  
19 4279321000006119  
20 4091041000006114  
21 8694361000006118  
22 6972251000006116  
23 4297871000006114  
24 7961001000006111  
25 8105711000006115  
26 6607631000006119  
27 6671541000006112  
28 6723191000006119  
29 3541143016  
30 6436351000006112  
31 287032015  
32 8342711000006110  
33 3904971000006113  
34 287031010  
35 389111000006119  
36 288174013  
37 1977041000006112  
38 1878431000006119  
39 1878441000006112  
40 1761311000006118  
41 1762131000006117  
42 1762151000006112  
43 825881000006114  
44 825891000006112  
45 4090811000006113  
46 5004491000006116  
47 3082081000006114  
48 4085611000006119  
49 4279211000006118  
50 4091091000006117  
51 6054511000006115  
52  
53  
54  
55  
56  
57  
58  
59  
60

For peer review only

1  
2 5650961000006110  
3 4091171000006117  
4 4327411000006115  
5 4279151000006113  
6 8338681000006110  
7 4297881000006112  
8 3785181000006115  
9 389001000006116  
10 2376041000000113  
11 365853018  
12 459601018  
13 4256461000006111  
14 6436271000006111  
15 7671071000006114  
16 3533587010  
17 4742831000006112  
18 8190391000006119  
19 4085591000006113  
20 1814921000006112  
21 288177018  
22 288182013  
23 1761351000006117  
24 4279921000006118  
25 906841000006112  
26 854381000006118  
27 6436281000006114  
28 4280411000006117  
29 6436371000006119  
30 6857301000006117  
31 6671551000006114  
32 8265981000006111  
33 6436291000006112  
34 2802031000006116  
35 4090881000006118  
36 4279741000006110  
37 4256481000006118  
38 4279721000006115  
39 7671121000006114  
40 6723201000006116  
41 4091131000006115  
42 2802051000006111  
43 8024291000006116  
44 7266641000006112  
45 6436241000006115  
46 5084691000006117  
47 7333141000006111  
48 4090781000006111  
49 4279841000006115  
50 4279821000006110  
51 2963081000006116  
52  
53  
54  
55  
56  
57  
58  
59  
60

For peer review only

1  
2 4280431000006111  
3 3533591017  
4 7796921000006118  
5 1815001000006119  
6 287027016  
7  
8 825731000006117  
9 388991000006116  
10 288178011  
11 288190013  
12  
13 288191012  
14 1761361000006115  
15 908851000006113  
16 257855012  
17 4279291000006111  
18 6280601000006113  
19  
20 7671101000006116  
21 3289651000006112  
22 4091051000006111  
23 5004511000006110  
24 4298901000006113  
25  
26 389011000006118  
27 4090971000006110  
28 4090941000006119  
29 3541141019  
30  
31 4090951000006117  
32 4279781000006116  
33 9186431000006114  
34 6861211000006110  
35 5084711000006119  
36 3082071000006111  
37  
38 4278881000006117  
39 3527596018  
40 4279171000006115  
41 4090831000006119  
42 12626771000006119  
43 4091071000006118  
44 6052971000006114  
45 3528269015  
46  
47 4279801000006117  
48 8694391000006114  
49 4091161000006112  
50 4278971000006114  
51 1814951000006115  
52 2168331000000117  
53 2229631000000112  
54 12031271000006114  
55 1074341000006113  
56 4279341000006114  
57 5009891000006115  
58  
59  
60 11777201000006114

For peer review only

1 7796991000006116  
2 459603015  
3 129081000000115  
4 152322017  
5 829181000006115  
6 7711131000006114  
7 6981961000006114  
8 3515791000006119  
9 4596351000006117  
10 3527607014  
11 3527597010  
12 7705061000006116  
13 7701991000006114  
14 3344251000006110  
15 4090871000006116  
16 4279751000006112  
17 7702801000006118  
18 7708531000006113  
19 4279911000006114  
20 7706051000006111  
21 7708771000006117  
22 7704681000006118  
23 8265821000006115  
24 7702661000006118  
25 7705031000006113  
26 3528268011  
27 2802021000006119  
28 7706061000006113  
29 4278851000006113  
30 7702701000006114  
31 7705441000006114  
32 7704671000006116  
33 7704731000006111  
34 7708731000006115  
35 7960991000006110  
36 7296281000006118  
37 4298821000006112  
38 3533582016  
39 4278961000006119  
40 6671571000006116  
41 7658881000006114  
42 8339341000006117  
43 7333161000006110  
44 7702401000006116  
45 7796971000006117  
46 7960971000006114  
47 7705211000006114  
48 7708371000006116  
49 7713771000006114  
50 7326221000006117  
51  
52  
53  
54  
55  
56  
57  
58  
59  
60

For peer review only



1  
2 3533585019  
3 4279351000006111  
4 4279891000006112  
5 4279121000006116  
6 6671561000006111  
7  
8 7298661000006113  
9 7705431000006116  
10 7658801000006117  
11 7701961000006118  
12  
13 7833241000006116  
14 4091141000006113  
15 7705291000006116  
16 6273011000006115  
17 7702101000006110  
18  
19 8024311000006117  
20 6857331000006113  
21 6601991000006118  
22 4279731000006117  
23 7326231000006119  
24  
25 7704641000006112  
26 7704191000006114  
27 7658891000006112  
28 7705461000006113  
29 4280481000006112  
30 7294881000006114  
31 7704631000006119  
32  
33 3541159016  
34 4279281000006113  
35 5004501000006112  
36 7705271000006117  
37 6436341000006110  
38 7658911000006114  
39 7702471000006110  
40 7705451000006111  
41  
42 3527593014  
43  
44 3785171000006118  
45 6861251000006111  
46 7631511000006112  
47 7671131000006112  
48  
49 7796931000006115  
50 4279831000006113  
51 5073771000006119  
52 3156721000006114  
53 4256451000006114  
54 7702671000006113  
55 8298021000006115  
56 8334851000006112  
57 3994521000006116  
58 5419561000006118  
59 7708591000006112  
60

For peer review only

1 7708581000006114  
2 7708301000006110  
3 3916501000006115  
4 4279791000006118  
5 6272981000006117  
6 7625191000006114  
7 7658791000006118  
8 7671081000006112  
9 4256471000006116  
10 4278871000006115  
11 7707951000006114  
12 7710861000006118  
13 7705281000006119  
14 4090801000006110  
15 4279691000006113  
16 5084741000006115  
17 5650971000006115  
18 264371011  
19 825721000006115  
20 829221000006112  
21 1907831000006117  
22 1907861000006114  
23 4279161000006110  
24 5009881000006118  
25 4332401000006117  
26 7708721000006118  
27 7704691000006115  
28 7705421000006119  
29 7708601000006116  
30 7704721000006113  
31 7708491000006113  
32 7266651000006114  
33 7702111000006113  
34 4279331000006116  
35 7702681000006111  
36 6272961000006110  
37 6054531000006114  
38 4279371000006118  
39 7705301000006115  
40 4279851000006118  
41 4279021000006117  
42 7698531000006117  
43 7702791000006119  
44 7705201000006111  
45 7713781000006112  
46 7787821000006113  
47 5588871000006113  
48 4742841000006119  
49 287020019  
50 287021015  
51  
52  
53  
54  
55  
56  
57  
58  
59  
60

For peer review only

1  
2 2302501000000114  
3 4090931000006112  
4 4280401000006115  
5 5004481000006119  
6 6592361000006110  
7 6857341000006115  
8 7704931000006113  
9 7796981000006119  
10 4091061000006113  
11 4279871000006111  
12 6716421000006111  
13 7787831000006111  
14 7712061000006114  
15 7708291000006114  
16 7791051000006119  
17 7705261000006112  
18 4279201000006116  
19 7658831000006113  
20 4280441000006118  
21 3515863011  
22 6436381000006116  
23 7702381000006116  
24 4279061000006111  
25 7712021000006115  
26 7707941000006112  
27 7702691000006114  
28 4091181000006119  
29 3541157019  
30 3533589013  
31 4332361000006110  
32 7708511000006119  
33 7705001000006117  
34 7708381000006118  
35 7710981000006116  
36 7701771000006111  
37 5084721000006110  
38 6052981000006112  
39 6716411000006115  
40 7719941000006118  
41 5009901000006116  
42 5084681000006115  
43 7702121000006117  
44 7708561000006116  
45 4332411000006119  
46 4742821000006114  
47 1878411000006113  
48 1121631000000110  
49 603931000000114  
50 7501731000006112  
51 143288017

For peer review only

1 765886100006116  
2 770209100006116  
3 770495100006118  
4 822315100006111  
5 932500100006115  
6 643625100006118  
7 3514144017  
8 728950100006117  
9 802273100006117  
10 643631100006111  
11 729448100006112  
12 508470100006117  
13 715541100006113  
14 751159100006117  
15 409085100006114  
16 433238100006117  
17 686124100006114  
18 770496100006116  
19 765885100006118  
20 770242100006114  
21 730854100006116  
22 771088100006111  
23 287029018  
24 82587100006111  
25 627300100006118  
26 409099100006111  
27 728680100006113  
28 770504100006115  
29 771039100006119  
30 729484100006115  
31 765884100006115  
32 427977100006119  
33 769852100006115  
34 765881100006119  
35 672318100006117  
36 826597100006113  
37 770517100006112  
38 408560100006117  
39 287014015  
40 783327100006112  
41 765882100006110  
42 765894100006113  
43 287022010  
44 288185010  
45 1245674100006113  
46 420080100006118  
47 409090100006116  
48 288173019  
49 770486100006112  
50 192421100006112

For peer review only

1  
2 7294691000006113  
3 7631521000006116  
4 6280611000006111  
5 7260251000006113  
6 7704941000006115  
7 4091101000006111  
8 7704181000006111  
9 7702131000006119  
10 7705051000006118  
11 8105701000006118  
12 4327441000006116  
13 7658871000006111  
14 3951391000006115  
15 7294851000006118  
16 3010191000006111  
17 4279711000006111  
18 4279141000006111  
19 7328811000006111  
20 7708571000006111  
21 8266811000006119  
22 7704711000006117  
23 4279101000006114  
24 11887321000006116  
25 7333151000006113  
26 7702651000006115  
27 7702371000006119  
28 3541154014  
29 7813131000006113  
30 7710381000006117  
31 4279311000006110  
32 7708501000006117  
33 7658921000006118  
34 3527603013  
35 4256771000006111  
36 4327391000006115  
37 5143451000006111  
38 3289661000006114  
39 4332371000006115  
40 7702141000006112  
41 7704991000006112  
42 4200811000006115  
43 4327451000006119  
44 3951411000006115  
45 3541153015  
46 7708541000006115  
47 8266341000006114  
48 1907841000006110  
49 4297891000006110  
50 7294491000006110  
51 3082061000006116  
52  
53  
54  
55  
56  
57  
58  
59  
60

For peer review only

1 7307131000006118  
2 7710871000006113  
3 7713761000006119  
4 7708761000006112  
5 7704971000006111  
6 5009931000006112  
7 7625201000006112  
8 7658931000006115  
9 7704701000006115  
10 7484811000006117  
11 7667371000006110  
12 4332391000006119  
13 4090961000006115  
14 4063961000006110  
15 11989701000006113  
16 7294871000006111  
17 7704981000006114  
18 7708311000006113  
19 1121571000000111  
20 287012016  
21 7658901000006111  
22 3533590016  
23 7708521000006110  
24 4091021000006119  
25 5084751000006118  
26 12031261000006119  
27 7796941000006113  
28 4090821000006117  
29 4279811000006119  
30 7704201000006112  
31 7708551000006118  
32 1715721000006111  
33 1812841000006118  
34 1907851000006112  
35 337231000006117  
36 264371011  
37 264418012  
38 3515761000006110  
39 3515801000006118  
40 3515811000006115  
41 474391000006110  
42 474401000006112  
43 6955711000006116  
44 6960951000006115  
45 6973421000006116  
46 6973441000006111  
47 6975941000006117  
48 6981921000006115  
49 825881000006114  
50 825891000006112

For peer review only

1  
2 879271000006114  
3 906841000006112  
4 908851000006113  
5 925451000006113  
6 925771000006110  
7

8  
9  
10  
11  
12  
13  
14  
15  
16  
17  
18  
19  
20  
21  
22  
23  
24  
25  
26  
27  
28  
29  
30  
31  
32  
33  
34  
35  
36  
37  
38  
39  
40  
41  
42  
43  
44  
45  
46  
47  
48  
49  
50  
51  
52  
53  
54  
55  
56  
57  
58  
59  
60

For peer review only

1 Term  
2  
3 HIV disease resulting in wasting syndrome  
4 Asymptomatic HIV Infection - First Presentation  
5 Asymptomatic HIV Infection - Subsequent Presentation  
6 H/O: HIV  
7  
8 [SHHAPT] Attendance for HIV related care  
9 [SHHAPT] New HIV diagnosis - acute - diagnosed prev. elsewhere  
10 HIV monitoring telephone invite  
11 HIV monitoring third telephone invitation  
12 HIV disease resulting in cytomegaloviral disease  
13 HIV disease resulting in candidiasis  
14 [X]HIV disease resulting in unspecified malignant neoplasm  
15 [X]Dementia in human immunodef virus [HIV] disease  
16 HIV dis reslt/oth mal neopl/lymph,h'matopoetc+reltd tissu  
17 HIV disease resulting/unspcf infectious+parasitic disease  
18 HIV positive general health check service declined  
19 [X]HIV disease resulting in multiple infections  
20 HIV - Human immunodeficiency virus infection wasting syndrome  
21 HIV - Human immunodeficiency virus infection  
22 Asymptomatic HIV infection  
23 HIV disease complicating pregnancy childbirth puerperium  
24 Human immunodeficiency virus (HIV) positive  
25 HIV infection with infectious mononucleosis-like syndrome  
26 HIV 2 RNA  
27 HIV-1  
28 HIV 2 gp125 antibody  
29 Leucoplakia of tongue associated with HIV disease  
30 Human immunodeficiency virus (HIV) infection category B2  
31 HIV CDC category B1  
32 HIV WHO class  
33 HIV - Human immunodeficiency virus encephalitis  
34 Pulmonary arterial hypertension associated with HIV infection  
35 Immunoglobulin G antibody to HIV 1  
36 People with HIV or AIDS  
37 Human immunodeficiency virus (HIV) Centers for Disease Control and Prevention (CDC) category C2 (AIDS)  
38 Invasive carcinoma of uterine cervix co-occurrent with HIV (human immunodeficiency virus) infection  
39 Symptomatic HIV (human immunodeficiency virus) I infection  
40 HIV 1 p66 antibody  
41 HIV-1 antigen  
42 HIV - Congenital human immunodeficiency virus positive status syndrome  
43 Human immunodeficiency virus (HIV) viral load  
44 Hairy leucoplakia of tongue associated with HIV disease  
45 HIV WHO class I  
46 HIV-2 p41  
47 WHO 2007 HIV infection clinical stage 3 and tuberculosis  
48 HIV WHO class IV (AIDS)  
49 [X] HIV disease resulting in haematological and immunological abnormalities, not elsewhere classified  
50 HIV 1 p55 antibody  
51 WHO 2007 HIV infection clinical stage 4  
52 [X]HIV disease resulting in multiple diseases classified elsewhere  
53  
54  
55  
56  
57  
58  
59  
60



1 Human immunodeficiency virus (HIV) World Health Organisation (WHO) class  
2 WHO 2007 HIV infection clinical stage 3  
3 HIV 1 p65 antibody  
4 HIV 1 p18 antibody  
5 HIV 2 p68 antibody  
6 Human immunodeficiency virus (HIV) Centers for Disease Control and Prevention (CDC) category A3 (AIDS)  
7 HIV retinopathy  
8 HIV WHO class III  
9 HIV 1 p31 antibody  
10 Deoxyribonucleic acid of HIV 2  
11 HIV (human immunodeficiency virus) type 2 antiviral resistance measurement by RNA (ribonucleic acid) analys  
12 Asymptomatic HIV infection in pregnancy  
13 HIV infection, pediatric  
14 HIV infection, paediatric  
15 Human immunodeficiency virus (HIV) II infection category B1  
16 Human immunodeficiency virus (HIV) World Health Organization (WHO) class finding  
17 Immunoglobulin G antibody to HIV 2  
18 Hivid 375microgram tablets (Roche Products Ltd) 100 tablet  
19 HIV CDC category C3 (AIDS)  
20 Congenital HIV infection  
21 HIV infection with aseptic meningitis  
22 HIV infection WHO 2007 clinical stage 1 co-occurrent with malaria  
23 HIV infection with acute lymphadenitis  
24 HIV (human immunodeficiency virus) type 1 antiviral resistance measurement by RNA (ribonucleic acid) analys  
25 Human immunodeficiency virus (HIV) infection with acute lymphadenitis  
26 Human immunodeficiency virus (HIV) Centers for Disease Control and Prevention (CDC) category B3 (AIDS)  
27 Human immunodeficiency virus (HIV) Centers for Disease Control and Prevention (CDC) category finding  
28 HIV-associated retinopathy  
29 HIV - Human immunodeficiency virus neuropathy  
30 HIV infection WHO 2007 clinical stage 2 co-occurrent with malaria  
31 Hivid 750microgram tablets (Roche Products Ltd)  
32 HIV 1 p28 antibody  
33 Human immunodeficiency virus (HIV) Centers for Disease Control and Prevention (CDC) category B2  
34 Human immunodeficiency virus (HIV) Centers for Disease Control and Prevention (CDC) category C3 (AIDS)  
35 WHO 2007 HIV infection clinical stage 2  
36 HIV - Human immunodeficiency virus myopathy  
37 HIV (human immunodeficiency virus) in childbirth  
38 HIV 1 gp34 antibody  
39 HIV 1 p53 antibody  
40 Human immunodeficiency virus (HIV) II infection category B2  
41 Human immunodeficiency virus type 2 (HIV-2) antibody  
42 HIV 1 IgG  
43 HIV disease resulting in Kaposi sarcoma  
44 Referral to community HIV (human immunodeficiency virus) nurse specialist  
45 Human immunodeficiency virus (HIV) carrier  
46 HIV disease resulting in mycobacterial infection  
47 HIV disease resulting in unspecified malignant neoplasm  
48 HIV disease resulting in multiple diseases CE  
49 [X]HIV disease resulting/other infectious+parasitic diseases  
50 [SHHAPT] New HIV diagnosis - late

1 Hivid  
2 Human immunodeficiency virus (HIV) infection category B1  
3 HIV - Human immunodeficiency virus diarrhea  
4 Human immunodeficiency virus (HIV) World Health Organisation (WHO) class III  
5 Human immunodeficiency virus (HIV) Centers for Disease Control and Prevention (CDC) category A1  
6 WHO 2007 HIV infection clinical stage 2 and tuberculosis  
7 HIV CDC category B3 (AIDS)  
8 HIV 2 antibody positive and HIV 1 antibody cross-reactivity  
9 [D]Laboratory evidence of human immunodeficiency virus [HIV]  
10 Human immunodeficiency virus (HIV) World Health Organization (WHO) class II  
11 HIV 1 p32 antibody  
12 HIV-related sclerosing cholangitis  
13 Proviral deoxyribonucleic acid of HIV 1  
14 Neuropathy caused by HIV - human immunodeficiency virus  
15 HIV 2 proviral DNA  
16 HIV 1 p24 antigen  
17 HIV 1 phenotyping  
18 HIV 1 p58 antibody  
19 Human immunodeficiency virus (HIV) World Health Organisation (WHO) class I  
20 Hivid 750microgram tablets (Roche Products Ltd) 100 tablet  
21 HIV-related microangiopathy of the retina  
22 HIV 1 identification  
23 Extrapulmonary TB (tuberculosis) co-occurrent with HIV (human immunodeficiency virus) infection  
24 HIV (human immunodeficiency virus) viral load by log rank  
25 HIV 1 nucleic acid detection  
26 Oral hairy leucoplakia associated with HIV disease  
27 HIV EIA test positive  
28 WHO 2007 HIV infection clinical stage 1 and tuberculosis  
29 HIV WHO class finding  
30 HIV disease resulting in lymphoid interstitial pneumonitis  
31 HIV (human immunodeficiency virus) disease resulting in haematological and immunological abnormalities  
32 HIV infection  
33 HIV disease resulting in multiple malignant neoplasms  
34 [X]HIV disease resulting/unspcf infectious+parasitic disease  
35 [X]HIV disease resulting in other bacterial infections  
36 HIV-1/HIV-2 antigen/antibody combination immunoassay positive  
37 HIV monitoring first telephone invitation  
38 HIV monitoring second telephone invitation  
39 [SHHAPT] HIV positive  
40 [SHHAPT] New HIV diagnosis - diagnosed previously elsewhere  
41 [SHHAPT] New HIV diagnosis - late - diagnosed prev. elsewhere  
42 HIV Infection With Symptoms, Not AIDS - First Presentation  
43 HIV Infection With Symptoms, Not AIDS - Subsequent Presentation  
44 HIV CDC category A2  
45 HIV - Human immunodeficiency virus leukoencephalopathy  
46 HIV2 - Human immunodeficiency virus type 2  
47 Human immunodeficiency virus (HIV) p24 antigen  
48 HIV 2 gp80 antibody  
49 Human immunodeficiency virus (HIV) World Health Organisation (WHO) class II  
50 HIV viral load

1 Human immunodeficiency virus HIV-related sclerosing cholangitis  
2 Human immunodeficiency virus (HIV) World Health Organisation (WHO) class IV (acquired immunodeficiency s  
3 HIV-1 Antibody  
4 HIV 2 p56 antibody  
5 HIV-1 (human immunodeficiency virus type 1) subtype identification  
6 Human immunodeficiency virus HIV-1 identification  
7 HIV 2 infection  
8 HIV (human immunodeficiency virus) disease resulting in haematological and immunological abnormalities  
9 HIV (human immunodeficiency virus) drug resistance test  
10 Acute HIV infection  
11 HIV (human immunodeficiency virus) viral load  
12 HIV-1 gp120  
13 Human immunodeficiency virus (HIV) World Health Organization class  
14 Anti-HIV 1 IgG  
15 HIV WHO 2007 infection clinical stage 3 co-occurrent with malaria  
16 HIV - Human immunodeficiency virus infection constitutional disease  
17 HIV (Human immunodeficiency virus) positive general health check service declined - enhanced services admir  
18 HIV p24 antigen  
19 HIV disease resulting in Pneumocystis jirovecii pneumonia  
20 [X]HIV disease resulting in other viral infections  
21 [X]HIV disease resulting in other non-Hodgkin's lymphoma  
22 [SHHAPT] New HIV diagnosis  
23 HIV 1 p15 antibody  
24 [RFC] HIV/AIDS  
25 HIV infection  
26 Human immunodeficiency virus (HIV) World Health Organization (WHO) class  
27 HIV 1 p26 antibody  
28 Human immunodeficiency virus (HIV) World Health Organisation (WHO) class finding  
29 Hairy leukoplakia of tongue associated with HIV disease  
30 Oral hairy leukoplakia associated with HIV disease  
31 HIV (human immunodeficiency virus) 1 genotype determination by RNA (ribonucleic acid) analysis  
32 Human immunodeficiency virus (HIV) World Health Organisation class  
33 HIV  
34 HIV CDC category B2  
35 HIV 1 p17 antibody  
36 HIV-1 gp160  
37 HIV 2 p24 antibody  
38 Anti-HIV 2 IgG  
39 HIV ELISA test positive  
40 Human immunodeficiency virus (HIV) World Health Organization (WHO) class III  
41 HIV - Human immunodeficiency virus  
42 Symptomatic human immunodeficiency virus (HIV) I infection  
43 Increased human immunodeficiency virus (HIV) viral load  
44 HIV CDC category  
45 HIV - Human immunodeficiency virus enteropathy  
46 HIV 1 genotyping  
47 HIV CDC category A1  
48 HIV 2 p41 antibody  
49 HIV 1 p64 antibody  
50 Serologic test for HIV-1

1 Human immunodeficiency virus (HIV) 1 antigen  
 2 HIV WHO 2007 infection clinical stage 4 co-occurrent with malaria  
 3 HIV 1 proviral DNA  
 4 [X]HIV disease resulting in other non-Hodgkin lymphoma  
 5 HIV disease resulting in multiple infections  
 6 HIV disease result/haematological+immunologic abnorms,NEC  
 7 [X]HIV dis reslt/oth mal neopl/lymph,h'matopoetc+reltd tissu  
 8 [X]HIV disease resulting in other mycoses  
 9 [X]HIV disease resulting in other specified conditions  
 10 [X]Unspecified human immunodeficiency virus [HIV] disease  
 11 [SHHAPT] New HIV diagnosis - acute  
 12 [RFC] AIDS/HIV  
 13 HIV positive  
 14 HIV 1 gp105 antibody  
 15 Finding of HIV status  
 16 HIV 2 IgG  
 17 Human immunodeficiency virus (HIV) infection with infectious mononucleosis-like syndrome  
 18 Human immunodeficiency virus (HIV) World Health Organization (WHO) class I  
 19 HIV - Human immunodeficiency virus leucoencephalopathy  
 20 Human immunodeficiency virus (HIV) 2 gp125 antibody assay  
 21 [X]HIV disease resulting in multiple diseases classified elsewhere  
 22 HIV CDC category C2 (AIDS)  
 23 HIV CDC category C1 (AIDS)  
 24 WHO 2007 HIV infection clinical stage 4 and tuberculosis  
 25 Human immunodeficiency virus (HIV) Centers for Disease Control and Prevention (CDC) category C1 (AIDS)  
 26 HIV 1 gp120 antibody  
 27 Hivid  
 28 Leukoplakia of tongue associated with HIV disease  
 29 HIV - Human immunodeficiency virus diarrhoea  
 30 HIV-2  
 31 HIV 2 gp36 antibody  
 32 WHO 2007 HIV infection clinical stage 1  
 33 HIV 2 p26 antibody  
 34 HIV CDC category A3 (AIDS)  
 35 HIV (human immunodeficiency virus) 1 antibody presence in serum  
 36 HIV WHO class II  
 37 Human immunodeficiency virus (HIV) infection with aseptic meningitis  
 38 HIV fusion inhibitor  
 39 HIV 1 gp160 antibody  
 40 Hivid 375microgram tablets (Roche Products Ltd)  
 41 Human immunodeficiency virus (HIV) World Health Organization (WHO) class IV (acquired immunodeficiency s  
 42 HIV 1 p23 antibody  
 43 HIV disease resulting in other types of non-Hodgkin lymphoma  
 44 HIV disease resulting in Burkitt lymphoma  
 45 Seen by community HIV (human immunodeficiency virus) nurse  
 46 HIVEP2 (human immunodeficiency virus type I enhancer binding protein 2) related intellectual disability  
 47 Adverse reaction to Hivid  
 48 HIV 1 p51 antibody  
 49 Neuropathy due to HIV - human immunodeficiency virus  
 50 [X]Hiv disease resulting in hematological and immunological abnormalities, not elsewhere classified

1 Proviral deoxyribonucleic acid of HIV 2  
2 HIV (human immunodeficiency virus) antibody/antigen (Duo)  
3 HIV1 (human immunodeficiency virus 1) antibody level  
4 Asymptomatic human immunodeficiency virus infection  
5 Human immunodeficiency virus with constitutional disease  
6 Burkitt's lymphoma co-occurrent with human immunodeficiency virus infection  
7 Human immunodeficiency virus infection wasting syndrome  
8 Immunodeficiency due to human immunodeficiency virus infection  
9 Human immunodeficiency virus positive  
10 World Health Organization 2007 Human immunodeficiency virus infection clinical stage 4  
11 World Health Organization 2007 Human immunodeficiency virus infection clinical stage 2  
12 Acute endocarditis co-occurrent with human immunodeficiency virus infection  
13 Neuralgia co-occurrent with human immunodeficiency virus infection  
14 Congenital human immunodeficiency virus infection  
15 Human immunodeficiency virus Centers for Disease Control and Prevention category B1  
16 Human immunodeficiency virus, type I glycoprotein 41 antibody  
17 Anemia co-occurrent with human immunodeficiency virus infection  
18 Pyrexia of unknown origin co-occurrent with human immunodeficiency virus infection  
19 Human immunodeficiency virus, type I protein 15 antibody  
20 Infectious gastroenteritis co-occurrent with human immunodeficiency virus infection  
21 Human immunodeficiency virus antibodies positive and p24 antigen positive  
22 Progressive multifocal leukoencephalopathy co-occurrent with human immunodeficiency virus infection  
23 Human immunodeficiency virus 1 ribonucleic acid measurement by nucleic acid amplification test  
24 Strongyloidiasis co-occurrent with human immunodeficiency virus infection  
25 Enlargement of liver co-occurrent with human immunodeficiency virus infection  
26 Human immunodeficiency virus fusion inhibitor  
27 Human immunodeficiency virus  
28 Disorder of central nervous system co-occurrent with human immunodeficiency virus infection  
29 Human immunodeficiency virus, type II glycoprotein 125 antibody  
30 Salmonellosis co-occurrent with human immunodeficiency virus infection  
31 Infection caused by Nocardia co-occurrent with human immunodeficiency virus infection  
32 Progressive multifocal leukoencephalopathy co-occurrent with human immunodeficiency virus infection  
33 Organic brain syndrome co-occurrent with human immunodeficiency virus infection  
34 Reactive for Human immunodeficiency virus antibody  
35 Extrapulmonary tuberculosis co-occurrent with human immunodeficiency virus infection  
36 Human immunodeficiency virus 2 glycoprotein 125 antibody  
37 Measurement of Human immunodeficiency virus 2 glycoprotein 105 antibody  
38 Human immunodeficiency virus World Health Organization 2007 stage 1 co-occurrent with malaria  
39 Human immunodeficiency virus, type I protein 23 antibody  
40 Oral hairy leucoplakia associated with human immunodeficiency virus disease  
41 Antibody to human immunodeficiency virus, type II protein 16  
42 Human immunodeficiency virus IgG avidity  
43 Human immunodeficiency virus 1 genotyping  
44 Myocarditis co-occurrent with human immunodeficiency virus infection  
45 Proviral deoxyribonucleic acid of Human immunodeficiency virus 2  
46 Invasive carcinoma of uterine cervix co-occurrent with human immunodeficiency virus infection  
47 Disorder of peripheral nervous system co-occurrent with human immunodeficiency virus infection  
48 Infection caused by Cytomegalovirus co-occurrent with human immunodeficiency virus infection  
49 Recurrent salmonella septicaemia co-occurrent with human immunodeficiency virus infection  
50 Determination of susceptibility of Human immunodeficiency virus 1 to panel of antiretroviral drugs using phen

1 Human immunodeficiency virus World Health Organization 2007 stage 2 co-occurrent with malaria  
2 Human immunodeficiency virus, type I protein 66 antibody  
3 Human immunodeficiency virus, type I glycoprotein 34 antibody  
4 Human immunodeficiency virus, type II protein 68 antibody  
5 Oral hairy leukoplakia associated with human immunodeficiency virus disease  
6 Human immunodeficiency virus 2 protein 53 antibody  
7 Bacterial pneumonia co-occurrent with human immunodeficiency virus infection  
8 Antibody to human immunodeficiency virus, type I protein 40  
9 Splenomegaly co-occurrent with human immunodeficiency virus infection  
10 Sequela of infection caused by Human immunodeficiency virus  
11 Human immunodeficiency virus World Health Organization class III  
12 Acquired haemolytic anaemia co-occurrent with human immunodeficiency virus infection  
13 Finding of human immunodeficiency virus antibody titre  
14 Candidiasis of esophagus co-occurrent with human immunodeficiency virus infection  
15 Symptomatic human immunodeficiency virus I infection  
16 Hairy leukoplakia of tongue associated with human immunodeficiency virus disease  
17 Human immunodeficiency virus encephalitis  
18 Human immunodeficiency virus, type I protein 17 antibody  
19 Human immunodeficiency virus 1 phenotyping  
20 Disorder of respiratory system co-occurrent with human immunodeficiency virus infection  
21 Disseminated infection caused by Strongyloides co-occurrent with human immunodeficiency virus infection  
22 Human immunodeficiency virus, type II protein 16 antibody  
23 Isosporiasis co-occurrent with human immunodeficiency virus infection  
24 Human immunodeficiency virus, type I protein 24 antigen  
25 Human immunodeficiency virus 2 glycoprotein 120 antibody  
26 Reticulosarcoma co-occurrent with human immunodeficiency virus infection  
27 Human immunodeficiency virus World Health Organization 2007 stage 4 co-occurrent with tuberculosis  
28 Human immunodeficiency virus, type I glycoprotein 105 antibody  
29 Human immunodeficiency virus leukoencephalopathy  
30 Visual impairment co-occurrent with human immunodeficiency virus infection  
31 Human immunodeficiency virus Centers for Disease Control and Prevention category finding  
32 Human immunodeficiency virus, type I glycoprotein 40 Ab  
33 Primary cerebral lymphoma co-occurrent with human immunodeficiency virus infection  
34 Nocardiosis co-occurrent with human immunodeficiency virus infection  
35 World Health Organization 2007 Human immunodeficiency virus infection clinical stage 1  
36 Human immunodeficiency virus II infection  
37 Leucoplakia of tongue associated with human immunodeficiency virus disease  
38 Human immunodeficiency virus 2 DNA  
39 Immunoglobulin G antibody to Human immunodeficiency virus type 2  
40 Proviral deoxyribonucleic acid of Human immunodeficiency virus 1  
41 Human immunodeficiency virus, type II protein 41 antibody  
42 Human immunodeficiency virus-associated periodontitis  
43 Human immunodeficiency virus I infection  
44 Human immunodeficiency virus, type I glycoprotein antigen 120  
45 Disorder of skin co-occurrent with human immunodeficiency virus infection  
46 Facial lipoatrophy associated with human immunodeficiency virus  
47 Human immunodeficiency virus drug resistance test  
48 Asymptomatic human immunodeficiency virus infection in pregnancy  
49 Human immunodeficiency virus antibody  
50 Dermatophytosis co-occurrent with human immunodeficiency virus infection



1 Herpes zoster infection co-occurrent with human immunodeficiency virus infection  
2 Diffuse non-Hodgkin's immunoblastic lymphoma co-occurrent with human immunodeficiency virus infection  
3 Human immunodeficiency virus infection with acute lymphadenitis  
4 Human immunodeficiency virus, type I glycoprotein 160 antibody  
5 Human immunodeficiency virus antibody titer - finding  
6 Human immunodeficiency virus 2 RNA  
7 Human immunodeficiency virus, type I protein 40 Ab  
8 Immunoglobulin G antibody to Human immunodeficiency virus type 1  
9 Human immunodeficiency virus, type 1 glycoprotein antigen 160  
10 Human immunodeficiency virus, type II glycoprotein 36 antibody  
11 Renal failure syndrome co-occurrent with human immunodeficiency virus infection  
12 Opportunistic mycosis co-occurrent with human immunodeficiency virus infection  
13 Infective arthritis co-occurrent with human immunodeficiency virus infection  
14 Human immunodeficiency virus Centers for Disease Control and Prevention category A1  
15 Human immunodeficiency virus, type I protein 31 antibody  
16 Human immunodeficiency virus diarrhea  
17 Human immunodeficiency virus-related sclerosing cholangitis  
18 Human immunodeficiency virus carrier  
19 Non-Hodgkin lymphoma associated with Human immunodeficiency virus infection  
20 Human immunodeficiency virus infection with secondary clinical infectious disease  
21 Human immunodeficiency virus infection monitoring telephone invitation  
22 Human immunodeficiency virus infection monitoring third telephone invitation  
23 Human immunodeficiency virus, type II protein 26 antibody  
24 Neuropathy due to human immunodeficiency virus  
25 Human immunodeficiency virus 1 RNA  
26 Human immunodeficiency virus antibody positive  
27 Presenile dementia co-occurrent with human immunodeficiency virus infection  
28 Demyelinating disease of central nervous system co-occurrent with human immunodeficiency virus infection  
29 Infection caused by Dermatophyte co-occurrent with human immunodeficiency virus infection  
30 Pneumocystosis co-occurrent with human immunodeficiency virus infection  
31 Coccidiosis co-occurrent with human immunodeficiency virus infection  
32 Copies of human immunodeficiency virus ribonucleic acid above reference range  
33 Heart disease co-occurrent with human immunodeficiency virus infection  
34 Human immunodeficiency virus, type I protein 51 antibody  
35 Myelitis co-occurrent with human immunodeficiency virus infection  
36 Human immunodeficiency virus antibody titre - finding  
37 Human immunodeficiency virus viral load  
38 Human immunodeficiency virus, type I protein 55 antibody  
39 Acquired hemolytic anemia co-occurrent with human immunodeficiency virus infection  
40 Human immunodeficiency virus, type I protein 53 antibody  
41 Human immunodeficiency virus, type I protein 32 antibody  
42 Reactive for human immunodeficiency virus p24 antigen  
43 Anaemia co-occurrent with human immunodeficiency virus infection  
44 Recurrent bacterial pneumonia co-occurrent with human immunodeficiency virus infection  
45 Recurrent salmonella septicemia co-occurrent with human immunodeficiency virus infection  
46 Candidiasis of upper respiratory tract co-occurrent with human immunodeficiency virus infection  
47 Congenital human immunodeficiency virus positive status syndrome  
48 Human immunodeficiency virus infection with neurological disease  
49 Human immunodeficiency virus with other clinical findings  
50 Acquired human immunodeficiency virus infection syndrome NOS  
51  
52  
53  
54  
55  
56  
57  
58  
59  
60

1 Human immunodeficiency virus infection monitoring invitation  
2 Human immunodeficiency virus Centers for Disease Control and Prevention category B3 (acquired immunodeficiency)  
3 Human immunodeficiency virus, type I protein 26 antibody  
4 Human immunodeficiency virus leucoencephalopathy  
5 Human immunodeficiency virus encephalopathy  
6 Hairy leucoplakia of tongue associated with human immunodeficiency virus disease  
7 Disorder of spinal cord co-occurrent with human immunodeficiency virus infection  
8 Proviral DNA of Human immunodeficiency virus 2  
9 Human immunodeficiency virus World Health Organization class I  
10 Human immunodeficiency virus, type I protein 18 antibody  
11 Pediatric human immunodeficiency virus infection  
12 Infection of upper respiratory tract caused by *Candida* co-occurrent with human immunodeficiency virus infection  
13 Disseminated atypical infection caused by *Mycobacterium* co-occurrent with human immunodeficiency virus infection  
14 Diffuse non-Hodgkin immunoblastic lymphoma co-occurrent with human immunodeficiency virus infection  
15 Human immunodeficiency virus 2 antibody positive and Human immunodeficiency virus 1 antibody cross-reactive  
16 Agranulocytosis co-occurrent with human immunodeficiency virus infection  
17 Human immunodeficiency virus, type II glycoprotein 80 antibody  
18 Human immunodeficiency virus, type II glycoprotein 140 Ab  
19 Human immunodeficiency virus 1 antigen  
20 Asymptomatic human immunodeficiency virus A2 infection  
21 Human immunodeficiency virus World Health Organization class finding  
22 Skin rash co-occurrent with human immunodeficiency virus infection  
23 Human immunodeficiency virus, type I protein 28 antibody  
24 Multidermatomal infection caused by Herpes zoster co-occurrent with human immunodeficiency virus infection  
25 Nephrotic syndrome co-occurrent with human immunodeficiency virus infection  
26 Infection caused by *Salmonella* co-occurrent with human immunodeficiency virus infection  
27 Human immunodeficiency virus World Health Organization class IV (acquired immunodeficiency syndrome)  
28 Human immunodeficiency virus World Health Organization 2007 stage 3 co-occurrent with tuberculosis  
29 Human immunodeficiency virus World Health Organization 2007 stage 3 co-occurrent with malaria  
30 Human immunodeficiency virus DNA  
31 Infection caused by herpes simplex virus co-occurrent with human immunodeficiency virus infection  
32 Aplastic anemia co-occurrent with human immunodeficiency virus infection  
33 Cytomegalovirus infection co-occurrent with human immunodeficiency virus infection  
34 Focal segmental glomerulosclerosis co-occurrent with human immunodeficiency virus infection  
35 Subacute adenoviral encephalitis co-occurrent with human immunodeficiency virus infection  
36 Human immunodeficiency virus diarrhoea  
37 Human immunodeficiency virus infection with aseptic meningitis  
38 Paediatric human immunodeficiency virus infection  
39 Immune reconstitution inflammatory syndrome caused by human immunodeficiency virus infection  
40 Human immunodeficiency virus neuropathy  
41 Human immunodeficiency virus enteropathy  
42 Disorder of eye proper co-occurrent with human immunodeficiency virus infection  
43 Infection caused by *Aspergillus* co-occurrent with human immunodeficiency virus infection  
44 Human immunodeficiency virus 1 ribonucleic acid  
45 Human immunodeficiency virus infection constitutional disease  
46 Human immunodeficiency virus monitoring admin.  
47 Human immunodeficiency virus annual review  
48 Human immunodeficiency virus viral load by log rank  
49 Pulmonary arterial hypertension associated with human immunodeficiency virus infection  
50 Human immunodeficiency virus infection



1 Anti-Human immunodeficiency virus, type II glycoprotein 140 antibody  
2 Candidiasis of oesophagus co-occurrent with human immunodeficiency virus infection  
3 Nephropathy co-occurrent with human immunodeficiency virus infection  
4 People with human immunodeficiency virus or acquired immune deficiency syndrome  
5 Human immunodeficiency virus in mother complicating childbirth  
6 Human immunodeficiency virus Centers for Disease Control and Prevention category  
7 Asymptomatic human immunodeficiency virus A1 infection  
8 Human immunodeficiency virus I glycoprotein 43 antibody  
9 Human immunodeficiency virus  
10 Human immunodeficiency virus World Health Organization class  
11 Human immunodeficiency virus 2 glycoprotein 34 antibody  
12 Human immunodeficiency virus non-pathogenic diarrhoea  
13 History of asymptomatic human immunodeficiency virus infection  
14 Human immunodeficiency virus Centers for Disease Control and Prevention category B  
15 Human immunodeficiency virus Centers for Disease Control and Prevention category A3 (acquired immunodeficiency)  
16 Human immunodeficiency virus 1 DNA  
17 Leukoplakia of tongue associated with human immunodeficiency virus disease  
18 Gastrointestinal malabsorption syndrome co-occurrent with human immunodeficiency virus infection  
19 Human immunodeficiency virus, type II glycoprotein 140 antibody  
20 Radiculitis co-occurrent with human immunodeficiency virus infection  
21 Human immunodeficiency virus 1 protein 68 antibody  
22 Infection caused by Microsporidia co-occurrent with human immunodeficiency virus infection  
23 Burkitt lymphoma co-occurrent with human immunodeficiency virus infection  
24 Human immunodeficiency virus infection with persistent generalised lymphadenopathy  
25 Finding of human immunodeficiency virus antibody titer  
26 Human immunodeficiency virus Centers for Disease Control and Prevention category C2 (acquired immunodeficiency)  
27 Human immunodeficiency virus 1 protein 24 antibody  
28 Large liver co-occurrent with human immunodeficiency virus infection  
29 Infection caused by Cryptosporidium co-occurrent with human immunodeficiency virus infection  
30 Human immunodeficiency virus 2 protein 31 antibody  
31 Antibody to human immunodeficiency virus, type II glycoprotein 140  
32 Human immunodeficiency virus, type I glycoprotein 120 antibody  
33 Human immunodeficiency virus p24 antigen positive  
34 Human immunodeficiency virus, type I protein 40 antibody  
35 Human immunodeficiency virus enzyme-linked immunosorbent assay test positive  
36 Human immunodeficiency virus 1 genotype determination by ribonucleic acid analysis  
37 Cardiomyopathy co-occurrent with human immunodeficiency virus infection  
38 Human immunodeficiency virus p24 antigen  
39 Malignant neoplastic disease co-occurrent with human immunodeficiency virus infection  
40 Parkinsonism due to human immunodeficiency virus infection  
41 Anti-Human immunodeficiency virus, type I protein 40 antibody  
42 Anti-Human immunodeficiency virus, type I glycoprotein 40 antibody  
43 Symptomatic human immunodeficiency virus infection  
44 Malignant neoplastic disease co-occurrent with human immunodeficiency virus infection  
45 [V]Asymptomatic human immunodeficiency virus infection status  
46 Acute human immunodeficiency virus seroconversion illness  
47 Human immunodeficiency virus Centers for Disease Control and Prevention category B2  
48 [X]Human immunodeficiency virus disease  
49 Candidiasis of mouth co-occurrent with human immunodeficiency virus infection  
50 Human immunodeficiency virus type 1 subtype identification

1 Human immunodeficiency virus 2 protein 58 antibody  
2 Deoxyribonucleic acid of Human immunodeficiency virus 2  
3 Finding of human immunodeficiency virus status  
4 Hepatitis B associated with Human immunodeficiency virus infection  
5 Disorder of kidney co-occurrent with human immunodeficiency virus infection  
6 Human immunodeficiency virus World Health Organization class II  
7 Hemophagocytic syndrome co-occurrent with human immunodeficiency virus infection  
8 Disorder of eye co-occurrent with human immunodeficiency virus infection  
9 Hepatomegaly co-occurrent with human immunodeficiency virus infection  
10 Human immunodeficiency virus viral load by log rank  
11 Human immunodeficiency virus, type II antibody  
12 Human immunodeficiency virus, type II protein 16 Ab  
13 Human immunodeficiency virus type I  
14 Human immunodeficiency virus 2 protein 55 antibody  
15 Human immunodeficiency virus antigen test  
16 Human immunodeficiency virus, type II protein 24 antibody  
17 Human immunodeficiency virus, type II protein 56 antibody  
18 Determination of coreceptor tropism of Human immunodeficiency virus 1  
19 Infection caused by herpes zoster virus co-occurrent with human immunodeficiency virus infection  
20 Human immunodeficiency virus type 2 antiviral resistance measurement by ribonucleic acid analysis  
21 Infection caused by Pneumocystis co-occurrent with human immunodeficiency virus infection  
22 Human immunodeficiency virus, type I protein 65 antibody  
23 H/O asymptomatic human immunodeficiency virus infection  
24 Determination of susceptibility of Human immunodeficiency virus 1 to panel of antiretroviral drugs using geno  
25 Infection caused by Strongyloides co-occurrent with human immunodeficiency virus infection  
26 Eruption of skin co-occurrent with human immunodeficiency virus infection  
27 Human immunodeficiency virus World Health Organization 2007 stage 2 co-occurrent with tuberculosis  
28 Human immunodeficiency virus complicating pregnancy childbirth and the puerperium  
29 Dementia co-occurrent with human immunodeficiency virus infection  
30 Human immunodeficiency virus, type I protein 58 antibody  
31 Infection caused by Coccidia co-occurrent with human immunodeficiency virus infection  
32 Antibody to human immunodeficiency virus, type I glycoprotein 40  
33 World Health Organization 2007 Human immunodeficiency virus infection clinical stage 3  
34 Human immunodeficiency virus, type II protein antigen 41  
35 Human immunodeficiency virus type 1 antibody  
36 Human immunodeficiency virus myopathy  
37 Human immunodeficiency virus infection with infectious mononucleosis-like syndrome  
38 Human immunodeficiency virus deoxyribonucleic acid  
39 Disorder of gastrointestinal tract co-occurrent with human immunodeficiency virus infection  
40 Aplastic anaemia co-occurrent with human immunodeficiency virus infection  
41 Acute human immunodeficiency virus infection  
42 Human immunodeficiency virus type 2 antibody  
43 Human immunodeficiency virus type 1  
44 Human immunodeficiency virus World Health Organization 2007 stage 1 co-occurrent with tuberculosis  
45 Fever of unknown origin co-occurrent with human immunodeficiency virus infection  
46 Human immunodeficiency virus type 1 antiviral resistance measurement by ribonucleic acid analysis  
47 Human immunodeficiency virus infection monitoring first telephone invitation  
48 Human immunodeficiency virus type 1 identification  
49 Human immunodeficiency virus 2 protein 15 antibody  
50 Human immunodeficiency virus type 2  
51  
52  
53  
54  
55  
56  
57  
58  
59  
60

1 Human immunodeficiency virus 2 glycoprotein 36 antibody  
2 Microsporidiosis co-occurrent with human immunodeficiency virus infection  
3 Recurrent salmonella sepsis co-occurrent with human immunodeficiency virus infection  
4 Reactive for both human immunodeficiency virus antibodies and p24 antigen  
5 Neuritis co-occurrent with human immunodeficiency virus infection  
6 Neuropathy caused by human immunodeficiency virus  
7 Ribonucleic acid of Human immunodeficiency virus 2  
8 Human immunodeficiency virus, type I glycoprotein 40 antibody  
9 Polyneuropathy co-occurrent with human immunodeficiency virus infection  
10 Human immunodeficiency virus medication review  
11 Human immunodeficiency virus 1 and virus 2 antibodies and Human immunodeficiency virus 1 p24 antigen co  
12 Human immunodeficiency virus 1 deoxyribonucleic acid  
13 Human immunodeficiency virus Centers for Disease Control and Prevention category C1 (acquired immunodef  
14 Human immunodeficiency virus infection with persistent generalized lymphadenopathy  
15 Human immunodeficiency virus with secondary cancers  
16 Human immunodeficiency virus 2 glycoprotein 105 antibody  
17 Lymphadenopathy co-occurrent with human immunodeficiency virus infection  
18 Immunoblastic lymphoma co-occurrent with human immunodeficiency virus infection  
19 Human immunodeficiency virus monitoring  
20 Human immunodeficiency virus with neurological disease  
21 Anti-Human immunodeficiency virus, type II protein 16 antibody  
22 Human immunodeficiency virus World Health Organization 2007 stage 4 co-occurrent with malaria  
23 Herpes simplex virus infection co-occurrent with human immunodeficiency virus infection  
24 Human immunodeficiency virus Centers for Disease Control and Prevention category C3 (acquired immunodef  
25 Human immunodeficiency virus non-pathogenic diarrhea  
26 Human immunodeficiency virus type I enhancer binding protein 2 related intellectual disability  
27 Proviral DNA of Human immunodeficiency virus 1  
28 Human immunodeficiency virus Centers for Disease Control and Prevention category A2  
29 Human immunodeficiency virus, type I protein 64 antibody  
30 Chronic infection caused by herpes simplex virus co-occurrent with human immunodeficiency virus infection  
31 Aspergillosis co-occurrent with human immunodeficiency virus infection  
32 Human immunodeficiency virus positive general health check service declined  
33 Referral to community human immunodeficiency virus nurse specialist  
34 Human immunodeficiency virus infection monitoring second telephone invitation  
35 [V]Asymptomatic human immunodeficiency virus infection status  
36 aids carrier  
37 notification of aids  
38 aids  
39 aids - acquired immunodeficiency syndrome  
40 acquired immune deficiency syndrome (aids)  
41 aids - first presentation  
42 aids - subsequent presentation  
43 kaposi sarcoma associated with aids  
44 mycobacteriosis associated with aids  
45 dementia associated with aids  
46 aids - acquired immune deficiency syndrome dementia complex  
47 pneumonia associated with aids  
48 cachexia associated with aids  
49 hiv infection with symptoms, not aids - first presentation  
50 hiv infection with symptoms, not aids - subsequent presentation

1  
2 aids +viral/chlamydial dis.nos  
3 [rfc] hiv/aids  
4 [rfc] aids/hiv  
5 aids carrier  
6 notification of aids  
7  
8  
9  
10  
11  
12  
13  
14  
15  
16  
17  
18  
19  
20  
21  
22  
23  
24  
25  
26  
27  
28  
29  
30  
31  
32  
33  
34  
35  
36  
37  
38  
39  
40  
41  
42  
43  
44  
45  
46  
47  
48  
49  
50  
51  
52  
53  
54  
55  
56  
57  
58  
59  
60

For peer review only

1  
2  
3  
4  
5  
6  
7  
8  
9  
10  
11  
12  
13  
14  
15  
16  
17  
18  
19  
20  
21  
22  
23  
24  
25  
26  
27  
28  
29  
30  
31  
32  
33  
34  
35  
36  
37  
38  
39  
40  
41  
42  
43  
44  
45  
46  
47  
48  
49  
50  
51  
52  
53  
54  
55  
56  
57  
58  
59  
60

For peer review only

1  
2  
3  
4  
5  
6  
7  
8  
9  
10  
11  
12  
13  
14  
15  
16  
17  
18  
19  
20  
21  
22  
23  
24  
25  
26  
27  
28  
29  
30  
31  
32  
33  
34  
35  
36  
37  
38  
39  
40  
41  
42  
43  
44  
45  
46  
47  
48  
49  
50  
51  
52  
53  
54  
55  
56  
57  
58  
59  
60

For peer review only

1  
2  
3  
4  
5  
6  
7  
8  
9  
10  
11  
12  
13  
14  
15  
16  
17  
18  
19  
20  
21  
22  
23  
24  
25  
26  
27  
28  
29  
30  
31  
32  
33  
34  
35  
36  
37  
38  
39  
40  
41  
42  
43  
44  
45  
46  
47  
48  
49  
50  
51  
52  
53  
54  
55  
56  
57  
58  
59  
60

For peer review only

1  
2  
3  
4  
5  
6  
7  
8  
9  
10  
11  
12  
13  
14  
15  
16  
17  
18  
19  
20  
21  
22  
23  
24  
25  
26  
27  
28  
29  
30  
31  
32  
33  
34  
35  
36  
37  
38  
39  
40  
41  
42  
43  
44  
45  
46  
47  
48  
49  
50  
51  
52  
53  
54  
55  
56  
57  
58  
59  
60

For peer review only



1  
2  
3  
4  
5  
6  
7  
8  
9  
10  
11  
12  
13  
14  
15  
16  
17  
18  
19  
20  
21  
22  
23  
24  
25  
26  
27  
28  
29  
30  
31  
32  
33  
34  
35  
36  
37  
38  
39  
40  
41  
42  
43  
44  
45  
46  
47  
48  
49  
50  
51  
52  
53  
54  
55  
56  
57  
58  
59  
60

For peer review only

1  
2  
3  
4  
5  
6  
7  
8  
9  
10  
11  
12  
13  
14  
15  
16  
17  
18  
19  
20  
21  
22  
23  
24  
25  
26  
27  
28  
29  
30  
31  
32  
33  
34  
35  
36  
37  
38  
39  
40  
41  
42  
43  
44  
45  
46  
47  
48  
49  
50  
51  
52  
53  
54  
55  
56  
57  
58  
59  
60

For peer review only

1  
2  
3  
4  
5  
6  
7  
8  
9  
10  
11  
12  
13  
14  
15  
16  
17  
18  
19  
20  
21  
22  
23  
24  
25  
26  
27  
28  
29  
30  
31  
32  
33  
34  
35  
36  
37  
38  
39  
40  
41  
42  
43  
44  
45  
46  
47  
48  
49  
50  
51  
52  
53  
54  
55  
56  
57  
58  
59  
60

For peer review only

1  
2  
3  
4  
5  
6  
7  
8  
9  
10  
11  
12  
13  
14  
15  
16  
17  
18  
19  
20  
21  
22  
23  
24  
25  
26  
27  
28  
29  
30  
31  
32  
33  
34  
35  
36  
37  
38  
39  
40  
41  
42  
43  
44  
45  
46  
47  
48  
49  
50  
51  
52  
53  
54  
55  
56  
57  
58  
59  
60

For peer review only

1  
2  
3  
4  
5  
6  
7  
8  
9  
10  
11  
12  
13  
14  
15  
16  
17  
18  
19  
20  
21  
22  
23  
24  
25  
26  
27  
28  
29  
30  
31  
32  
33  
34  
35  
36  
37  
38  
39  
40  
41  
42  
43  
44  
45  
46  
47  
48  
49  
50  
51  
52  
53  
54  
55  
56  
57  
58  
59  
60

For peer review only

1  
2  
3  
4  
5  
6  
7  
8  
9  
10  
11  
12  
13  
14  
15  
16  
17  
18  
19  
20  
21  
22  
23  
24  
25  
26  
27  
28  
29  
30  
31  
32  
33  
34  
35  
36  
37  
38  
39  
40  
41  
42  
43  
44  
45  
46  
47  
48  
49  
50  
51  
52  
53  
54  
55  
56  
57  
58  
59  
60

For peer review only

1  
2  
3  
4  
5  
6  
7  
8  
9  
10  
11  
12  
13  
14  
15  
16  
17  
18  
19  
20  
21  
22  
23  
24  
25  
26  
27  
28  
29  
30  
31  
32  
33  
34  
35  
36  
37  
38  
39  
40  
41  
42  
43  
44  
45  
46  
47  
48  
49  
50  
51  
52  
53  
54  
55  
56  
57  
58  
59  
60

For peer review only

1  
2  
3  
4  
5  
6  
7  
8  
9  
10  
11  
12  
13  
14  
15  
16  
17  
18  
19  
20  
21  
22  
23  
24  
25  
26  
27  
28  
29  
30  
31  
32  
33  
34  
35  
36  
37  
38  
39  
40  
41  
42  
43  
44  
45  
46  
47  
48  
49  
50  
51  
52  
53  
54  
55  
56  
57  
58  
59  
60

ay

For peer review only



1  
2 ICD-10 code  
3 B20  
4 B20.0  
5 B20.1  
6 B20.2  
7 B20.3  
8 B20.4  
9 B20.5  
10 B20.6  
11 B20.7  
12 B20.8  
13 B20.9  
14 B21  
15 B21.0  
16 B21.1  
17 B21.2  
18 B21.3  
19 B21.7  
20 B21.8  
21 B21.9  
22 B22  
23 B22.0  
24 B22.1  
25 B22.2  
26 B22.7  
27 B23  
28 B23.0  
29 B23.1  
30 B23.2  
31 B23.8  
32 B24  
33 Z21  
34 O98.7  
35 R75  
36 Z71.7  
37  
38  
39  
40  
41  
42  
43  
44  
45  
46  
47  
48  
49  
50  
51  
52  
53  
54  
55  
56  
57  
58  
59  
60

For peer review only

1  
2 Term

3 Human immunodeficiency virus [HIV] disease resulting in infectious and parasitic diseases  
4 HIV disease resulting in mycobacterial infection  
5 HIV disease resulting in other bacterial infections  
6 HIV disease resulting in cytomegaloviral disease  
7 HIV disease resulting in other viral infections  
8 HIV disease resulting in candidiasis  
9 HIV disease resulting in other mycoses  
10 HIV disease resulting in Pneumocystis jirovecii pneumonia  
11 HIV disease resulting in multiple infections  
12 HIV disease resulting in other infectious and parasitic diseases  
13 HIV disease resulting in unspecified infectious or parasitic disease  
14 Human immunodeficiency virus [HIV] disease resulting in malignant neoplasms  
15 HIV disease resulting in Kaposi sarcoma  
16 HIV disease resulting in Burkitt lymphoma  
17 HIV disease resulting in other types of non-Hodgkin lymphoma  
18 HIV disease resulting in other malignant neoplasms of lymphoid, haematopoietic and related tissue  
19 HIV disease resulting in multiple malignant neoplasms  
20 HIV disease resulting in other malignant neoplasms  
21 HIV disease resulting in unspecified malignant neoplasm  
22 Human immunodeficiency virus [HIV] disease resulting in other specified diseases  
23 HIV disease resulting in encephalopathy  
24 HIV disease resulting in lymphoid interstitial pneumonitis  
25 HIV disease resulting in wasting syndrome  
26 HIV disease resulting in multiple diseases classified elsewhere  
27 Human immunodeficiency virus [HIV] disease resulting in other conditions  
28 Acute HIV infection syndrome  
29 HIV disease resulting in (persistent) generalized lymphadenopathy  
30 HIV disease resulting in haematological and immunological abnormalities, not elsewhere classified  
31 HIV disease resulting in other specified conditions  
32 Unspecified human immunodeficiency virus [HIV] disease  
33 Asymptomatic human immunodeficiency virus [HIV] infection status  
34 Human immunodeficiency virus [HIV] disease complicating pregnancy, childbirth and the puerperium  
35 Laboratory evidence of human immunodeficiency virus [HIV]  
36 Human immunodeficiency virus [HIV] counselling  
37  
38  
39  
40  
41  
42  
43  
44  
45  
46  
47  
48  
49  
50  
51  
52  
53  
54  
55  
56  
57  
58  
59  
60

1  
2  
3  
4  
5  
6  
7  
8  
9  
10  
11  
12  
13  
14  
15  
16  
17  
18  
19  
20  
21  
22  
23  
24  
25  
26  
27  
28  
29  
30  
31  
32  
33  
34  
35  
36  
37  
38  
39  
40  
41  
42  
43  
44  
45  
46  
47  
48  
49  
50  
51  
52  
53  
54  
55  
56  
57  
58  
59  
60

m

For peer review only

1  
2 Medcodeid  
3 41398015  
4 297177019  
5 297179016  
6 297180018  
7 297181019  
8 2674605012  
9 2692565012  
10 299241000000110  
11 300141000000119  
12 315671000000110  
13 641211000000118  
14 641301000000114  
15 695191000006119  
16 699671000000115  
17 699731000000110  
18 699791000000111  
19 699911000000117  
20 905781000006118  
21 908811000006112  
22 983261000006119  
23 983291000006110  
24 983301000006111  
25 983311000006114  
26 1148911000000120  
27 1674121000000120  
28 1674381000000110  
29 1674661000000120  
30 1674971000000120  
31 1675051000000110  
32 1679791000006110  
33 1682241000006110  
34 1747821000006120  
35 1747831000006120  
36 1747851000006110  
37 1747861000006110  
38 1757431000000110  
39 1855101000006110  
40 1858501000006110  
41 1863341000006120  
42 2262931000000120  
43 2894411000006110  
44 3865621000006110  
45 3865631000006110  
46 4769281000006110  
47 5006891000006110  
48 5006901000006110  
49 5006911000006110  
50 5006921000006120  
51 5552111000006120

For peer review only

1  
2 7045281000006110  
3 7058051000006120  
4 7092351000006110  
5 7510741000006110  
6 7567771000006120  
7 7861151000006120  
8 145513018  
9 297130012  
10 345068012  
11 486695013  
12 905801000006119  
13 908821000006116  
14 3101701000006120  
15 3101721000006110  
16 3875981000006110  
17 136302010  
18 151829017  
19 297580012  
20 297581011  
21 297582016  
22 3988991000006110  
23 5006031000006120  
24 7263021000006120  
25 7559221000006110  
26 14195861000006100  
27  
28  
29  
30  
31  
32  
33  
34  
35  
36  
37  
38  
39  
40  
41  
42  
43  
44  
45  
46  
47  
48  
49  
50  
51  
52  
53  
54  
55  
56  
57  
58  
59  
60

For peer review only

1  
2 Term  
3 Multiple sclerosis  
4 Multiple sclerosis of the spinal cord  
5 Generalised multiple sclerosis  
6 Exacerbation of multiple sclerosis  
7 Multiple sclerosis NOS  
8 Secondary progressive multiple sclerosis  
9 Primary progressive multiple sclerosis  
10 Multiple sclerosis review  
11 Multiple sclerosis care plan agreed  
12 Multiple sclerosis multidisciplinary review  
13 Benign multiple sclerosis  
14 Malignant multiple sclerosis  
15 Multiple sclerosis of the brain stem  
16 Management of multiple sclerosis in onset phase  
17 Management of multiple sclerosis in early disease phase  
18 Management of multiple sclerosis in stable disability phase  
19 Management of multiple sclerosis in palliative phase  
20 [RFC] Multiple sclerosis  
21 [RFC] Multiple sclerosis  
22 Multiple sclerosis - personal health plan  
23 Multiple sclerosis - primary progressive  
24 Multiple sclerosis - secondary progressive  
25 Multiple sclerosis - relapsing remitting  
26 Multiple sclerosis review declined  
27 Multiple sclerosis monitoring administration  
28 Multiple sclerosis monitoring first letter  
29 Multiple sclerosis monitoring second letter  
30 Multiple sclerosis monitoring telephone invitation  
31 Multiple sclerosis monitoring third letter  
32 Management of multiple sclerosis in progressive disability phase  
33 Relapsing remitting multiple sclerosis  
34 Multiple sclerosis monitoring administration  
35 Multiple sclerosis monitoring first letter  
36 Multiple sclerosis monitoring third letter  
37 Multiple sclerosis monitoring telephone invite  
38 Referral to community multiple sclerosis team  
39 Multiple sclerosis questionnaire completed  
40 Suspected multiple sclerosis  
41 Referral by Multiple Sclerosis nurse specialist  
42 Suspected multiple sclerosis  
43 MS - Multiple sclerosis  
44 Acute disseminated encephalomyelitis  
45 ADEM - Acute disseminated encephalomyelitis  
46 Multiple sclerosis of the brainstem  
47 Acute relapsing multiple sclerosis  
48 Chronic progressive multiple sclerosis  
49 Multiple sclerosis (MS) chronic/progressive  
50 Remittent-progressive multiple sclerosis  
51 Kurtzke multiple sclerosis rating scale

1  
2 Multiple sclerosis (MS) secondary progressive  
3 Multiple sclerosis (MS) relapsing remitting  
4 Multiple sclerosis (MS) primary progressive  
5 Dementia associated with multiple sclerosis  
6 Multiple sclerosis clinic  
7 Progressive relapsing multiple sclerosis  
8 Foster-Kennedy syndrome  
9 Motor neurone disease NOS  
10 Kennedy syndrome  
11 Motor neurone disease  
12 [RFC] Motor neurone disease  
13 [RFC] Motor neurone disease  
14 Motor neuron disease  
15 MND - Motor neurone disease  
16 Lower motor neuron disease  
17 Neonatal myasthenia gravis  
18 Myasthenia gravis  
19 Persistent neonatal myasthenia gravis  
20 Juvenile or adult myasthenia gravis  
21 Myasthenia gravis NOS  
22 MG - Myasthenia gravis  
23 Late onset Huntington's disease  
24 Dementia due to Huntingtons disease  
25 Huntington disease-like syndrome  
26 Huntington disease  
27  
28  
29  
30  
31  
32  
33  
34  
35  
36  
37  
38  
39  
40  
41  
42  
43  
44  
45  
46  
47  
48  
49  
50  
51  
52  
53  
54  
55  
56  
57  
58  
59  
60

## ICD-10 code Term

|        |                                                          |
|--------|----------------------------------------------------------|
| G35    | Multiple sclerosis                                       |
| G12.2  | Motor neuron disease                                     |
| G12.20 | Motor neuron disease - Unspecified                       |
| G12.21 | Motor neuron disease - Amyotrophic lateral sclerosis     |
| G12.22 | Motor neuron disease - Progressive bulbar palsy          |
| G12.23 | Motor neuron disease - Primary lateral sclerosis         |
| G12.24 | Motor neuron disease - Familial motor neuron disease     |
| G12.25 | Motor neuron disease - Progressive spinal muscle atrophy |
| G12.29 | Motor neuron disease - Other motor neuron disease        |
| G70.0  | Myasthenia gravis                                        |
| G70.00 | Myasthenia gravis - without (acute) exacerbation         |
| G70.01 | Myasthenia gravis - with (acute) exacerbation            |
| G10    | Huntington's disease                                     |



1 Andersen et al (2023)

2 Inclusion criteria as in PANORAMIC protocol

3 Chronic respiratory disease (including chronic obstructive pulmonary disease (COPD), cystic fibrosis and  
4 asthma requiring at least daily use of preventative and/or reliever medication)

5 Chronic heart or vascular diseases

6 Renal disease: mild kidney disease (CKD) stage 2 and 3, with an eGFR measurement in the past 6 months

7 Chronic liver disease

8 Chronic neurological disease (including dementia, stroke, epilepsy)

9 Severe and profound learning disability

10 Down's syndrome

11 Diabetes mellitus (Type I or Type II)

12 present at birth and diagnosed in childhood) or secondary due to disease or treatment (e.g., sickle cell, HIV,  
13 cancer, chemotherapy)

14 Solid organ, bone marrow and stem cell transplant recipients

15 Morbid obesity (BMI > 35)

16 Severe mental illness

17 Community and care home resident

18 Description of sheet abbreviations:

19 pan\_ to reflect PANORAMIC trial criteria code list

20 \_XX\_ to reflect the concept

21 \_\_m to reflect medcodeid, \_icd to reflect ICD-10 codes, \_p to reflect procodeid or \_opcs to reflect OPCS procodeid

22 Format of sheets:

23 medcodeid and procodeid are stored as text, not integers, as per CPRD suggestions.

Medcodeid list ICD-10 code list Prodcodeid list OPCS code list

|           |             |           |              |
|-----------|-------------|-----------|--------------|
| pan_res_m | X           | pan_res_p | X            |
| pan_hv_m  | pan_hv_icd  | X         | X            |
| pan_ren_m | pan_ren_icd | X         | X            |
| pan_liv_m | pan_liv_icd | X         | X            |
| pan_neu_m | pan_neu_icd | X         | X            |
| pan_lea_m | pan_lea_icd | X         | X            |
| pan_dow_m | pan_dow_icd | X         | X            |
| pan_dm_m  | pan_dm_icd  | X         | X            |
| X         | X           | pan_imm_p | X            |
| pan_tra_m | pan_tra_icd | X         | pan_tra_opcs |
| pan_obe_m | pan_obe_icd | X         | X            |
| pan_men_m | pan_men_icd | pan_men_p | X            |
| pan_car_m | X           | X         | X            |

list

| 1  | Medcodeid         | Term                                                         |
|----|-------------------|--------------------------------------------------------------|
| 2  | 105519017         | chronic bronchitis                                           |
| 3  | 111723011         | bagassosis                                                   |
| 4  | 113497011         | centrilobular emphysema                                      |
| 5  | 1148241000000114  | cystic fibrosis annual review                                |
| 6  | 1174311000000111  | arthropathy in cystic fibrosis                               |
| 7  | 1174361000000113  | cystic fibrosis with distal intestinal obstruction syndrome  |
| 8  | 1174401000000116  | fibrosing colonopathy                                        |
| 9  | 11777991000006114 | bronchiolitis obliterans organizing pneumonia                |
| 10 | 11778011000006118 | boop - bronchiolitis obliterans organising pneumonia         |
| 11 | 11778021000006114 | bronchiolitis obliterans with usual interstitial pneumonitis |
| 12 | 11778031000006112 | boop - bronchiolitis obliterans organizing pneumonia         |
| 13 | 11828571000006115 | bronchiolitis fibrosa obliterans                             |
| 14 | 11932331000006115 | copd gold group a                                            |
| 15 | 11932341000006113 | copd gold group b                                            |
| 16 | 11932351000006110 | copd gold group c                                            |
| 17 | 11932361000006112 | copd gold group d                                            |
| 18 | 121482015         | talc pneumoconiosis                                          |
| 19 | 121968010         | fish-meal workers' lung                                      |
| 20 | 1222334016        | other specified chronic obstructive pulmonary disease        |
| 21 | 1222335015        | chronic obstructive pulmonary disease nos                    |
| 22 | 1223250017        | sarcoidosis of lung                                          |
| 23 | 1224939016        | malt workers' lung                                           |
| 24 | 1227346010        | cystic fibrosis with combined manifestations                 |
| 25 | 1230190015        | macleod's unilateral emphysema                               |
| 26 | 1233152013        | bird-fancier's lung                                          |
| 27 | 1235159019        | maple bark strippers' lung                                   |
| 28 | 123588010         | mucopurulent chronic bronchitis                              |
| 29 | 124281000006119   | suberosis ( cork-handlers' lung )                            |
| 30 | 12482551000006112 | airways obstructn irreversible                               |
| 31 | 12483991000006118 | chronic respiratory conditions due to chemical fumes         |
| 32 | 12489801000006116 | admit copd emergency                                         |
| 33 | 12704691000006117 | interstitial emphysema                                       |
| 34 | 12728161000006116 | chronic obstructive airways disease nos                      |
| 35 | 12759361000006112 | chronic obstructive pulmonary disease nos                    |
| 36 | 128792019         | congenital bronchiectasis                                    |
| 37 | 130626012         | cannabinosis                                                 |
| 38 | 13455018          | rheumatic pneumonia                                          |
| 39 | 139979010         | fetid chronic bronchitis                                     |
| 40 | 141566014         | pigeon-fanciers' lung                                        |
| 41 | 141591000006118   | silica and silicate pneumoconiosis                           |
| 42 | 142162019         | byssinosis                                                   |
| 43 | 142759013         | cystic fibrosis with meconium ileus                          |
| 44 | 142869013         | occupational lung disease                                    |
| 45 | 14610012          | berylliosis                                                  |
| 46 | 1488423019        | chronic obstructive pulmonary disease follow-up              |
| 47 | 1488424013        | chronic obstructive pulmonary disease annual review          |
| 48 | 1494601017        | coad follow-up                                               |
| 49 | 1495466012        | cystic fibrosis with no meconium ileus                       |
| 50 | 1495490013        | meconium ileus in cystic fibrosis                            |

|    |                  |                                                                  |
|----|------------------|------------------------------------------------------------------|
| 1  |                  |                                                                  |
| 2  | 149741000006116  | sequoiosis (red-cedar asthma)                                    |
| 3  | 161781000006116  | sawyer - jones syndrome                                          |
| 4  | 162301000006117  | rheumatoid lung                                                  |
| 5  | 1683181000000112 | chronic obstructive pulmonary disease 3 monthly review           |
| 6  | 1683221000000119 | chronic obstructive pulmonary disease 6 monthly review           |
| 7  | 1699821000006113 | at risk of chronic obstructive pulmonary diseas exacerbation     |
| 8  | 1708971000006117 | cystic fibrosis annual review                                    |
| 9  | 1709161000006116 | arthropathy in cystic fibrosis                                   |
| 10 | 1709341000006117 | liver disease due to cystic fibrosis                             |
| 11 | 1709421000006118 | complication of transplanted lung                                |
| 12 | 1711491000006119 | post-transplant bronchiolitis obliterans syndrome                |
| 13 | 1736361000000112 | cystic fibrosis related cirrhosis                                |
| 14 | 1747711000000111 | interstitial lung disease due to connective tissue disease       |
| 15 | 1759021000006116 | interstitial lung disease due to collagen vascular disease       |
| 16 | 1763641000006113 | cirrhosis of liver due to cystic fibrosis                        |
| 17 | 1763651000006110 | pancreatic sufficient cystic fibrosis                            |
| 18 | 1765681000000110 | history of chronic obstructive pulmonary disease                 |
| 19 | 1771201000006116 | chronic obstructive pulmonary disease multidisciplinary review   |
| 20 | 1778239014       | rheumatoid lung disease                                          |
| 21 | 1783891000006115 | chronic obstructiv pulmonary disease medication optimisation     |
| 22 | 178500017        | extrinsic allergic alveolitis                                    |
| 23 | 1786131000006116 | idiopathic pulmonary fibrosis                                    |
| 24 | 1786505011       | caplan's syndrome                                                |
| 25 | 1786545019       | rheumatoid lung                                                  |
| 26 | 1800881000000119 | post-transplant bronchiolitis obliterans syndrome                |
| 27 | 1811661000006110 | copd self-management plan agreed                                 |
| 28 | 1811741000006117 | copd self-management plan review                                 |
| 29 | 1823851000006119 | chronic obstructive pulmonary disease confirmed                  |
| 30 | 183191000006115  | recurrent wheezy bronchitis                                      |
| 31 | 1850871000006115 | reason for influenza vaccine - chronic respiratory disease       |
| 32 | 1854771000006117 | cystic fibrosis manifested by failure to thrive                  |
| 33 | 1854781000006119 | cystic fibrosis manifested by rectal prolapse                    |
| 34 | 1854791000006116 | cystic fibrosis with liver manifestations                        |
| 35 | 1854801000006115 | cystic fibrosis manifested by pancreatitis                       |
| 36 | 1854811000006117 | cystic fibrosis manifested by acute/persistent respiratory symp. |
| 37 | 1854831000006111 | cystic fibrosis manifested by bronchiectasis                     |
| 38 | 1854841000006118 | cystic fibrosis manifested by electrolyte imbalance              |
| 39 | 1854851000006116 | cystic fibrosis manifested by male infertility                   |
| 40 | 1854861000006119 | cystic fibrosis manifested by malnutrition                       |
| 41 | 1854871000006114 | cystic fibrosis manifested by meconium ileus                     |
| 42 | 1854881000006112 | cystic fibrosis manifested by intestinal obstruction             |
| 43 | 1854901000006114 | cystic fibrosis manifested by malabsorption                      |
| 44 | 1854911000006112 | cystic fibrosis manifested by nasal polyp/sinus disease          |
| 45 | 1882421000006113 | 1 copd exacerbation in past year                                 |
| 46 | 1882431000006111 | 3+ copd exacerbations in past year                               |
| 47 | 1882441000006118 | 2 copd exacerbations in past year                                |
| 48 | 1882451000006116 | no copd exacerbations in past year                               |
| 49 | 189221016        | hypersensitivity pneumonitis                                     |
| 50 | 19421011         | interstitial emphysema                                           |
| 51 | 1948051000006112 | asthma-chronic obstructive pulmonary disease overlap syndrom     |

|    |                  |                                                                           |
|----|------------------|---------------------------------------------------------------------------|
| 1  |                  |                                                                           |
| 2  | 196654011        | cryptogenic fibrosing alveolitis                                          |
| 3  | 2009451000006113 | chronic obstructive pulmonary disease post discharge review               |
| 4  | 2010061000006113 | acute non-infective exacerbation of chronic obstructive pulmonary disease |
| 5  | 207831000006116  | prematurity with interstitial pulmonary fibrosis                          |
| 6  | 20833017         | budgerigar-fanciers' lung                                                 |
| 7  | 211391000006118  | postinflammatory pulmonary fibrosis                                       |
| 8  | 21163015         | bronchiectasis                                                            |
| 9  | 2152091000000112 | has chronic obstructive pulmonary disease care plan                       |
| 10 | 2156690018       | cheese-washers' lung                                                      |
| 11 | 2160051010       | admit copd emergency                                                      |
| 12 | 216596014        | end stage chronic obstructive airways disease                             |
| 13 | 219651000006116  | pneumoconioses                                                            |
| 14 | 2222561000000111 | exacerbation of cystic fibrosis                                           |
| 15 | 2404941000000118 | h/o: bronchiectasis                                                       |
| 16 | 2411019          | silicosis                                                                 |
| 17 | 2475606014       | usual interstitial pneumonitis                                            |
| 18 | 24973018         | bauxite fibrosis of lung                                                  |
| 19 | 2511231000006117 | pneumoconiosis due to silica                                              |
| 20 | 2511251000006112 | nodular silicosis                                                         |
| 21 | 2511261000006114 | silicatoses                                                               |
| 22 | 2511271000006119 | pneumoconiosis caused by silica                                           |
| 23 | 2578881000006118 | panacinar emphysema                                                       |
| 24 | 2578901000006116 | vesicular emphysema                                                       |
| 25 | 2578911000006118 | alveolar emphysema of lung                                                |
| 26 | 2620011000006112 | rheumatic pneumonitis                                                     |
| 27 | 2631591000006117 | beryllium disease                                                         |
| 28 | 2631601000006113 | beryllium poisoning                                                       |
| 29 | 264537018        | airways obstructn irreversible                                            |
| 30 | 2670341000006112 | diffuse interstitial rheumatoid disease of lung                           |
| 31 | 2675247013       | liver disease due to cystic fibrosis                                      |
| 32 | 2676188013       | interstitial lung disease due to collagen vascular disease                |
| 33 | 268099017        | other specified transplantation of lung                                   |
| 34 | 268100013        | transplantation of lung nos                                               |
| 35 | 2692491000006117 | budgerigar-fanciers' disease                                              |
| 36 | 2692511000006111 | budgerigar-breeders' lung                                                 |
| 37 | 269761000006112  | obliterative bronchiolitis due to chemical fumes                          |
| 38 | 27096010         | giant bullous emphysema                                                   |
| 39 | 2712171000006116 | suberosis                                                                 |
| 40 | 2712181000006118 | cork-handlers' disease                                                    |
| 41 | 2712191000006115 | cork-handlers' lung                                                       |
| 42 | 2716231000006114 | chronic obstructive lung disease                                          |
| 43 | 2716241000006116 | chronic airway obstruction                                                |
| 44 | 2716251000006119 | chronic irreversible airway obstruction                                   |
| 45 | 2716261000006117 | chronic airflow obstruction                                               |
| 46 | 2716271000006112 | cafl - chronic airflow limitation                                         |
| 47 | 2716291000006113 | cao - chronic airflow obstruction                                         |
| 48 | 2716301000006114 | chronic airflow limitation                                                |
| 49 | 2716311000006112 | cal - chronic airflow limitation                                          |
| 50 | 2716321000006116 | copd - chronic obstructive pulmonary disease                              |
| 51 | 2716341000006111 | chronic airway disease                                                    |

|    |                  |                                                         |
|----|------------------|---------------------------------------------------------|
| 1  |                  |                                                         |
| 2  | 2716351000006113 | cold - chronic obstructive lung disease                 |
| 3  | 2732761000006118 | bauxite fibrosis of lung                                |
| 4  | 2732771000006113 | bauxite fume pneumoconiosis                             |
| 5  | 2732781000006111 | bauxite pneumoconiosis                                  |
| 6  | 2732791000006114 | bauxite workers' disease                                |
| 7  | 2732801000006110 | corundum smelters' lung                                 |
| 8  | 2732811000006113 | bauxite lung                                            |
| 9  | 2732821000006117 | bauxite pulmonary fibrosis                              |
| 10 | 2732831000006119 | bauxite fibrosis                                        |
| 11 | 2732841000006112 | shavers' disease                                        |
| 12 | 2763561000006112 | coffee-workers' disease                                 |
| 13 | 2763571000006117 | coffee workers disease                                  |
| 14 | 2775991000006115 | graphite fibrosis of lung                               |
| 15 | 2776001000006119 | graphitosis                                             |
| 16 | 2776011000006116 | graphite pneumoconiosis                                 |
| 17 | 2776021000006112 | graphite lung disease                                   |
| 18 | 2776031000006110 | graphite fibrosis                                       |
| 19 | 2785461000006110 | pneumoconiosis caused by inorganic dust                 |
| 20 | 2796611000006118 | farmers' lung disease                                   |
| 21 | 2796621000006114 | moldy-hay disease                                       |
| 22 | 2796631000006112 | mouldy-hay disease                                      |
| 23 | 2796641000006119 | mouldy hay disease                                      |
| 24 | 2796651000006117 | moldy hay disease                                       |
| 25 | 2796661000006115 | farmers lung                                            |
| 26 | 2806071000006119 | grain-handlers' lung                                    |
| 27 | 28128015         | coffee-workers' lung                                    |
| 28 | 285100019        | emphysematous bronchitis                                |
| 29 | 285104011        | obstructive chronic bronchitis                          |
| 30 | 2860331000006118 | amianthosis                                             |
| 31 | 2860341000006111 | asbestos pneumoconiosis                                 |
| 32 | 2860351000006113 | pulmonary asbestosis                                    |
| 33 | 2867041000006113 | post-tuberculous bronchiectasis                         |
| 34 | 2871871000006110 | sequoiosis                                              |
| 35 | 2871881000006113 | red-cedar asthma                                        |
| 36 | 2871891000006111 | sequoiasis                                              |
| 37 | 287930013        | sarcoidosis of lung with sarcoidosis of lymph nodes     |
| 38 | 2914471000006114 | malt-workers' lung                                      |
| 39 | 2914481000006112 | malt-workers' alveolitis                                |
| 40 | 2914491000006110 | malt-workers' lung disease                              |
| 41 | 2914501000006119 | malt fever                                              |
| 42 | 2914511000006116 | malt house workers' cough                               |
| 43 | 2914521000006112 | alveolitis due to aspergillus clavatus and/or fumigatus |
| 44 | 2914541000006117 | malt workers lung                                       |
| 45 | 291961000006112  | 'ventilation' pneumonitis                               |
| 46 | 293528019        | cystic fibrosis                                         |
| 47 | 293530017        | fibrocystic disease                                     |
| 48 | 293532013        | mucoviscidosis                                          |
| 49 | 293537019        | cystic fibrosis with intestinal manifestations          |
| 50 | 293539016        | cystic fibrosis nos                                     |
| 51 | 29395011         | graphite fibrosis of lung                               |

|    |                  |                                                              |
|----|------------------|--------------------------------------------------------------|
| 1  |                  |                                                              |
| 2  | 2973011000006115 | coal pneumoconiosis                                          |
| 3  | 2973021000006111 | colliers' lung                                               |
| 4  | 2973031000006114 | colliers' anthracosis                                        |
| 5  | 2973041000006116 | miners' lung                                                 |
| 6  | 2973051000006119 | melanedema                                                   |
| 7  | 2973061000006117 | anthracosis                                                  |
| 8  | 2973071000006112 | black lung disease                                           |
| 9  | 2973081000006110 | coal workers' lung                                           |
| 10 | 2973091000006113 | miners' asthma                                               |
| 11 | 2973101000006119 | lung melanosis                                               |
| 12 | 2973111000006116 | pneumomelanosis                                              |
| 13 | 2973121000006112 | coal miners' lung                                            |
| 14 | 2973131000006110 | coal miners' pneumoconiosis                                  |
| 15 | 2973141000006117 | melanoedema                                                  |
| 16 | 2973151000006115 | cwp - coalworkers pneumoconiosis                             |
| 17 | 2973161000006118 | coal worker's lung                                           |
| 18 | 299001000000116  | chronic obstructive pulmonary disease disturbs sleep         |
| 19 | 299031000000110  | chronic obstructive pulmonary disease does not disturb sleep |
| 20 | 301127010        | obliterating fibrous bronchiolitis                           |
| 21 | 301444018        | simple chronic bronchitis nos                                |
| 22 | 301448015        | mucopurulent chronic bronchitis nos                          |
| 23 | 301450011        | chronic asthmatic bronchitis                                 |
| 24 | 301451010        | chronic wheezy bronchitis                                    |
| 25 | 301453013        | acute exacerbation of chronic obstructive airways disease    |
| 26 | 301455018        | obstructive chronic bronchitis nos                           |
| 27 | 301456017        | mixed simple and mucopurulent chronic bronchitis             |
| 28 | 301457014        | other chronic bronchitis                                     |
| 29 | 301458016        | other chronic bronchitis nos                                 |
| 30 | 301459012        | chronic bronchitis nos                                       |
| 31 | 301460019        | chronic bullous emphysema                                    |
| 32 | 301463017        | segmental bullous emphysema                                  |
| 33 | 301464011        | zonal bullous emphysema                                      |
| 34 | 301468014        | chronic bullous emphysema nos                                |
| 35 | 301469018        | other emphysema                                              |
| 36 | 301470017        | acute vesicular emphysema                                    |
| 37 | 301477019        | emphysema nos                                                |
| 38 | 301524014        | recurrent bronchiectasis                                     |
| 39 | 301525010        | post-infective bronchiectasis                                |
| 40 | 301526011        | bronchiectasis nos                                           |
| 41 | 301527019        | bird-fancier's lung nos                                      |
| 42 | 301528012        | other allergic alveolitis                                    |
| 43 | 301529016        | pituitary snuff-takers' disease                              |
| 44 | 301530014        | air-conditioner and humidifier lung                          |
| 45 | 301531013        | other allergic alveolitis nos                                |
| 46 | 301532018        | allergic alveolitis and pneumonitis nos                      |
| 47 | 301533011        | allergic extrinsic alveolitis nos                            |
| 48 | 301534017        | hypersensitivity pneumonitis nos                             |
| 49 | 301539010        | other specified chronic obstructive airways disease          |
| 50 | 301545019        | chronic obstructive airways disease nos                      |
| 51 | 301552017        | asbestosis nos                                               |



|    |                  |                                                                |
|----|------------------|----------------------------------------------------------------|
| 1  |                  |                                                                |
| 2  | 301555015        | massive silicotic fibrosis                                     |
| 3  | 301556019        | silica pneumoconiosis nos                                      |
| 4  | 301557011        | pneumoconiosis due to other inorganic dust                     |
| 5  | 301558018        | pneumoconiosis due to inorganic dust nos                       |
| 6  | 301559014        | pneumopathy due to inhalation of other dust                    |
| 7  | 301561017        | pneumopathy due to inhalation of other dust nos                |
| 8  | 301562012        | pneumoconiosis nos                                             |
| 9  | 301563019        | pneumoconiosis associated with tuberculosis                    |
| 10 | 301571015        | chronic respiratory conditions due to chemical fumes           |
| 11 | 301572010        | chronic emphysema due to chemical fumes                        |
| 12 | 301575012        | chronic pulmonary fibrosis due to chemical fumes               |
| 13 | 301576013        | chronic respiratory conditions due to chemical fumes nos       |
| 14 | 301609011        | chronic pulmonary radiation disease                            |
| 15 | 301610018        | chronic pulmonary radiation disease nos                        |
| 16 | 301611019        | drug-induced interstitial lung disorders                       |
| 17 | 301613016        | chronic drug-induced interstitial lung disorders               |
| 18 | 301709019        | idiopathic fibrosing alveolitis nos                            |
| 19 | 301716018        | lung disease with systemic sclerosis                           |
| 20 | 301718017        | pulmonary amyloidosis                                          |
| 21 | 301719013        | lung disease with polymyositis                                 |
| 22 | 301720019        | lung disease with sjogren's disease                            |
| 23 | 301721015        | lung disease with systemic lupus erythematosus                 |
| 24 | 301795015        | chronic pulmonary insufficiency following surgery              |
| 25 | 301835010        | [x]other emphysema                                             |
| 26 | 301836011        | [x]other specified chronic obstructive pulmonary disease       |
| 27 | 301838012        | [x]pneumoconiosis due to other dust containing silica          |
| 28 | 301839016        | [x]pneumoconiosis due to other specified inorganic dusts       |
| 29 | 301852014        | [x]other interstitial pulmonary diseases with fibrosis         |
| 30 | 3023061000006115 | heart-lung transplant with recipient cardiectomy-pneumonectomy |
| 31 | 3023071000006110 | hltx - heart lung transplant                                   |
| 32 | 3103581000006115 | extrinsic allergic bronchiolo-alveolitis                       |
| 33 | 3103591000006117 | hypersensitivity pneumonia                                     |
| 34 | 3103601000006113 | allergic alveolitis                                            |
| 35 | 3103611000006111 | allergic pneumonitis                                           |
| 36 | 3103621000006115 | allergic interstitial pneumonitis                              |
| 37 | 3103641000006110 | ea - extrinsic allergic alveolitis                             |
| 38 | 311496011        | fibrosing alveolitis associated with rheumatoid arthritis      |
| 39 | 3145221000006111 | obliterative bronchiolitis                                     |
| 40 | 3145231000006114 | ob - obliterative bronchiolitis                                |
| 41 | 3145561000006115 | pk - pneumoconiosis                                            |
| 42 | 31510012         | farmers' lung                                                  |
| 43 | 3152451000006114 | idiopathic pulmonary hemosiderosis                             |
| 44 | 3152461000006111 | brown induration of lung                                       |
| 45 | 3152471000006116 | pulmonary hemosiderosis                                        |
| 46 | 3152481000006118 | pulmonary haemosiderosis                                       |
| 47 | 3152491000006115 | iph - idiopathic pulmonary haemosiderosis                      |
| 48 | 3152501000006111 | iph - idiopathic pulmonary hemosiderosis                       |
| 49 | 3154151000006111 | massive silicotic fibrosis of lung                             |
| 50 | 3154161000006113 | massive fibrosis of lung co-occurrent and due to silicosis     |
| 51 | 3169561000006112 | detergent workers' lung                                        |



|    |                  |                                                             |
|----|------------------|-------------------------------------------------------------|
| 1  |                  |                                                             |
| 2  | 3183591000006116 | bronchiectasis, chronic sinusitis and dextrocardia syndrome |
| 3  | 3228301000006115 | unilateral emphysema                                        |
| 4  | 3228311000006117 | macleod's syndrome                                          |
| 5  | 3228321000006113 | unilateral hyperlucent lung                                 |
| 6  | 3228331000006111 | swyer-james syndrome                                        |
| 7  | 3257341000006116 | chronic pulmonary edema                                     |
| 8  | 3282201000006119 | humidifier lung                                             |
| 9  | 3282211000006116 | air conditioner lung                                        |
| 10 | 3282221000006112 | ventilation pneumonitis                                     |
| 11 | 3282231000006110 | humidifier and/or air conditioning pneumonitis              |
| 12 | 3282241000006117 | sauna takers lung                                           |
| 13 | 3319081000006115 | pulmonary hemosiderosis with glomerulonephritis             |
| 14 | 3319111000006114 | pulmonary haemosiderosis with glomerulonephritis            |
| 15 | 3331011000006115 | tin miners' lung                                            |
| 16 | 3331021000006111 | tin oxide pneumoconiosis                                    |
| 17 | 3331031000006114 | tin pneumoconiosis                                          |
| 18 | 3336391000006117 | fibrosis of lung                                            |
| 19 | 3336411000006117 | cirrhosis of lung                                           |
| 20 | 3348511000006118 | mushroom-workers' disease                                   |
| 21 | 3348521000006114 | mushroom pickers' disease                                   |
| 22 | 3348531000006112 | mushroom workers lung                                       |
| 23 | 3425361000006112 | wood-workers' lung                                          |
| 24 | 3425401000006119 | wood pulp workers' lung                                     |
| 25 | 348547019        | single lung transplant                                      |
| 26 | 348550016        | double lung transplant                                      |
| 27 | 350120014        | asbestos-induced pleural plaque                             |
| 28 | 350121013        | pleural plaque disease due to asbestosis                    |
| 29 | 350255018        | progressive massive fibrosis                                |
| 30 | 3513691000006110 | pulmonary siderosis                                         |
| 31 | 3513701000006110 | arc-welders' lung                                           |
| 32 | 3513711000006113 | arc-welders' pneumoconiosis                                 |
| 33 | 3513721000006117 | welders' lung                                               |
| 34 | 3513731000006119 | arc-welders' disease                                        |
| 35 | 3513741000006112 | welders' siderosis                                          |
| 36 | 3513751000006114 | arc-welders' nodulation                                     |
| 37 | 3513761000006111 | iron oxide lung                                             |
| 38 | 3513771000006116 | pneumoconiosis siderotico                                   |
| 39 | 3513781000006118 | siderotic lung disease                                      |
| 40 | 3513791000006115 | steel grinders' disease                                     |
| 41 | 3513801000006119 | iron pneumoconiosis                                         |
| 42 | 3593701000006114 | bagasse disease                                             |
| 43 | 3593711000006112 | bagasse workers' disease                                    |
| 44 | 3593721000006116 | bagasse workers' lung                                       |
| 45 | 3593731000006118 | sugar cane workers' hypersensitivity pneumonitis            |
| 46 | 3611791000006110 | centriacinar emphysema                                      |
| 47 | 362091000000110  | single lobe lung transplant                                 |
| 48 | 3627661000006112 | bird breeders' lung                                         |
| 49 | 3627671000006117 | bird fanciers' disease                                      |
| 50 | 3627681000006119 | avian protein hypersensitivity                              |
| 51 | 3627691000006116 | bird breeders' disease                                      |

|    |                  |                                                                     |
|----|------------------|---------------------------------------------------------------------|
| 1  |                  |                                                                     |
| 2  | 3627711000006118 | bfl - bird fanciers lung                                            |
| 3  | 3627721000006114 | bird fanciers lung                                                  |
| 4  | 3627731000006112 | bird fanciers' lung                                                 |
| 5  | 3629501000006118 | chronic respiratory condition due to fumes and/or vapours           |
| 6  | 3629511000006115 | chronic respiratory condition due to fumes and/or vapors            |
| 7  | 3629521000006111 | chronic respiratory condition caused by fumes and/or vapours        |
| 8  | 3629531000006114 | chronic respiratory condition caused by fumes and/or vapors         |
| 9  | 3629531000006114 | chronic respiratory condition caused by fumes and/or vapors         |
| 10 | 3657901000006117 | fibrosis of lung following radiation                                |
| 11 | 3657911000006119 | radiation fibrosis of lung                                          |
| 12 | 3689711000006118 | pneumoconiosis due to talc                                          |
| 13 | 3689721000006114 | talcosis                                                            |
| 14 | 3689721000006114 | talcosis                                                            |
| 15 | 3689731000006112 | pulmonary talcosis                                                  |
| 16 | 3689741000006119 | talc lung disease                                                   |
| 17 | 3689761000006115 | talc workers' pneumoconiosis                                        |
| 18 | 3689771000006110 | pneumoconiosis caused by talc                                       |
| 19 | 3689771000006110 | pneumoconiosis caused by talc                                       |
| 20 | 3762481000006115 | developmental bronchiectasis                                        |
| 21 | 3764021000006117 | interstitial emphysema of lung                                      |
| 22 | 3764031000006119 | interstitial pulmonary emphysema                                    |
| 23 | 3780471000006116 | cannabosis                                                          |
| 24 | 3780471000006116 | cannabosis                                                          |
| 25 | 3780481000006118 | hemp-workers' disease                                               |
| 26 | 37941013         | asbestosis                                                          |
| 27 | 3824111000006115 | cystic fibrosis without meconium ileus                              |
| 28 | 38677017         | tuberculous bronchiectasis                                          |
| 29 | 3873191000006110 | fetid chronic bronchitis                                            |
| 30 | 3888281000006116 | pigeon-fanciers' disease                                            |
| 31 | 3888281000006116 | pigeon-fanciers' disease                                            |
| 32 | 3888301000006117 | pigeon-breeders' lung                                               |
| 33 | 3888311000006119 | pigeon-breeders' disease                                            |
| 34 | 3888321000006110 | pigeon breeders' lung                                               |
| 35 | 3888321000006110 | pigeon breeders' lung                                               |
| 36 | 3894081000006118 | cotton workers' lung disease                                        |
| 37 | 3894091000006115 | cotton-dust asthma                                                  |
| 38 | 3894101000006114 | mill fever                                                          |
| 39 | 3907551000006116 | mucoviscidosis involving the lung                                   |
| 40 | 3907561000006119 | pulmonary cystic fibrosis                                           |
| 41 | 3908891000006112 | maple-bark strippers' lung                                          |
| 42 | 3908891000006112 | maple-bark strippers' lung                                          |
| 43 | 3908901000006111 | alveolitis due to cryptostroma corticale                            |
| 44 | 3908911000006114 | maple-bark disease                                                  |
| 45 | 3908921000006118 | maple-bark strippers' disease                                       |
| 46 | 3908941000006113 | maple bark strippers lung                                           |
| 47 | 3921361000006112 | emphysema of lung                                                   |
| 48 | 3921361000006112 | emphysema of lung                                                   |
| 49 | 3930661000006110 | transplant of lung                                                  |
| 50 | 3955621000006112 | catarrhal bronchitis                                                |
| 51 | 396108018        | bullous emphysema with collapse                                     |
| 52 | 396109014        | atrophic (senile) emphysema                                         |
| 53 | 396110016        | other emphysema nos                                                 |
| 54 | 396110016        | other emphysema nos                                                 |
| 55 | 3972641000006113 | aluminum pneumoconiosis                                             |
| 56 | 3972651000006110 | aluminium pneumoconiosis                                            |
| 57 | 405080018        | h/o: chr.obstr. airway disease                                      |
| 58 | 405121000000111  | health education - chronic obstructive pulmonary disease            |
| 59 | 40879015         | pulmonary sarcoidosis                                               |
| 60 | 40879015         | pulmonary sarcoidosis                                               |
|    | 424365019        | acute infective exacerbation of chronic obstructive airways disease |

|    |                  |                                                             |
|----|------------------|-------------------------------------------------------------|
| 1  |                  |                                                             |
| 2  | 4510801000006114 | end stage chronic obstructive pulmonary disease             |
| 3  | 451084014        | cystic fibrosis with other manifestations                   |
| 4  | 4542691000006113 | history of being lung transplant recipient                  |
| 5  | 4542701000006113 | history of lung transplant                                  |
| 6  | 457168017        | mild chronic obstructive pulmonary disease                  |
| 7  | 457169013        | moderate chronic obstructive pulmonary disease              |
| 8  | 457171013        | severe chronic obstructive pulmonary disease                |
| 9  | 457581000006111  | acute interstitial emphysema                                |
| 10 | 460650019        | [v]lung transplanted                                        |
| 11 | 4635301000006114 | airways obstruction irreversible                            |
| 12 | 4732991000006119 | chronic bronchitis with emphysema                           |
| 13 | 4733001000006118 | bronchitis with airway obstruction                          |
| 14 | 4733011000006115 | cob - chronic obstructive bronchitis                        |
| 15 | 4733021000006111 | obstructive chronic bronchitis                              |
| 16 | 4733031000006114 | chronic obstructive bronchitis                              |
| 17 | 474819014        | cryptogenic organising pneumonia                            |
| 18 | 474828010        | bronchiolitis obliterans organising pneumonia               |
| 19 | 475431013        | chronic obstructive pulmonary disease                       |
| 20 | 4760431000006115 | cf - cystic fibrosis                                        |
| 21 | 4760451000006110 | cf                                                          |
| 22 | 477131000006116  | allergic alveolitis and pneumonitis nos                     |
| 23 | 4781421000006111 | acute exacerbation of copd                                  |
| 24 | 4781431000006114 | acute exacerbation of chronic obstructive pulmonary disease |
| 25 | 4781461000006117 | emphysematous bulla                                         |
| 26 | 4781471000006112 | bullous emphysema                                           |
| 27 | 4781641000006119 | postinfectious bronchiectasis                               |
| 28 | 4781801000006115 | chronic respiratory conditions caused by chemical fumes     |
| 29 | 4781821000006113 | chronic emphysema caused by chemical fumes                  |
| 30 | 4781831000006111 | toxic bronchiolitis obliterans                              |
| 31 | 4781841000006118 | chemical bronchiolitis obliterans                           |
| 32 | 4781861000006119 | chronic pulmonary fibrosis caused by chemical fumes         |
| 33 | 4782051000006118 | drug-induced interstitial lung disorder                     |
| 34 | 4782071000006111 | drug induced interstitial lung disease                      |
| 35 | 4782331000006111 | dipf - diffuse interstitial pulmonary fibrosis              |
| 36 | 4782341000006118 | fibrosing alveolitis                                        |
| 37 | 4782361000006119 | uip - usual interstitial pneumonitis                        |
| 38 | 4782401000006112 | scleroderma lung disease                                    |
| 39 | 4782411000006110 | scleroderma of lung                                         |
| 40 | 4782441000006114 | lung disease co-occurrent with polymyositis                 |
| 41 | 4782451000006111 | polymyositis with pulmonary involvement                     |
| 42 | 4782461000006113 | lung disease with sjögren's disease                         |
| 43 | 4782481000006115 | lung disease with sjögren disease                           |
| 44 | 49227017         | coal workers' pneumoconiosis                                |
| 45 | 492443010        | bronchiolitis obliterans                                    |
| 46 | 492658013        | idiopathic pulmonary haemosiderosis                         |
| 47 | 494669012        | chronic pulmonary oedema                                    |
| 48 | 499259012        | siderosis                                                   |
| 49 | 5039311000006114 | sltx - single lung transplant                               |
| 50 | 5039331000006115 | dltx - double lung transplant                               |
| 51 | 5055241000006116 | complicated pneumoconiosis                                  |

|    |                  |                                                                                  |
|----|------------------|----------------------------------------------------------------------------------|
| 1  |                  |                                                                                  |
| 2  | 5055261000006117 | pmf - progressive massive fibrosis                                               |
| 3  | 506053014        | purulent chronic bronchitis                                                      |
| 4  | 508561017        | simple chronic bronchitis                                                        |
| 5  | 508562012        | chronic catarrhal bronchitis                                                     |
| 6  | 516801000000112  | very severe chronic obstructive pulmonary disease                                |
| 7  | 5492481000006115 | postinflammatory pulmonary fibrosis                                              |
| 8  | 5516841000006119 | history of chronic obstructive airway disease                                    |
| 9  | 553211000006119  | chron obstruct pulmonary dis wth acute exacerbation, unspec                      |
| 10 | 555461000006119  | chronic obstruct pulmonary dis with acute lower resp infectn                     |
| 11 | 555471000006114  | chronic obstructive airways disease                                              |
| 12 | 55602016         | compensatory emphysema                                                           |
| 13 | 556271000006115  | chronic pulmonary fibrosis following radiation                                   |
| 14 | 606441000006110  | cystic fibrosis with pulmonary manifestations                                    |
| 15 | 618361000000112  | chronic type 1 respiratory failure                                               |
| 16 | 618371000000117  | chronic type 2 respiratory failure                                               |
| 17 | 621121000006112  | diffuse pulmonary fibrosis                                                       |
| 18 | 640491000006111  | emphysema                                                                        |
| 19 | 6608771000006110 | rheumatoid pneumoconiosis                                                        |
| 20 | 6608781000006113 | caplan's syndrome                                                                |
| 21 | 6608791000006111 | caplans syndrome                                                                 |
| 22 | 6703861000006114 | cheese-workers' lung                                                             |
| 23 | 6703871000006119 | cheese-washers' disease                                                          |
| 24 | 67242018         | chronic respiratory failure                                                      |
| 25 | 6763231000006119 | emergency hospital admission for chronic obstructive pulmonary disease           |
| 26 | 6763251000006114 | emergency hospital admission for copd (chronic obstructive pulmonary disease)    |
| 27 | 7065871000006119 | chronic hypercapnic respiratory failure                                          |
| 28 | 7065881000006116 | chronic type ii respiratory failure                                              |
| 29 | 7084411000006112 | chronic hypoxaemic respiratory failure                                           |
| 30 | 7084421000006116 | chronic hypoxemic respiratory failure                                            |
| 31 | 7084441000006111 | chronic type i respiratory failure                                               |
| 32 | 73655011         | complication of transplanted lung                                                |
| 33 | 7484331000006119 | optimization of medication for chronic obstructive pulmonary disease             |
| 34 | 7484341000006112 | optimization of medication for chronic obstructive lung disease                  |
| 35 | 7484351000006114 | optimisation of medication for chronic obstructive lung disease                  |
| 36 | 75302014         | idiopathic fibrosing alveolitis                                                  |
| 37 | 7532701000006115 | usual interstitial pneumonia                                                     |
| 38 | 7783501000006111 | cryptogenic organizing pneumonia                                                 |
| 39 | 7783511000006114 | cop - cryptogenic organising pneumonitis                                         |
| 40 | 7783521000006118 | cop - cryptogenic organizing pneumonitis                                         |
| 41 | 786581000006114  | idiopathic pulmonary haemosiderosis                                              |
| 42 | 79212010         | simple silicosis                                                                 |
| 43 | 8058301000006110 | copd (chronic obstructive pulmonary disease) disturbs sleep                      |
| 44 | 8058321000006117 | copd (chronic obstructive pulmonary disease) does not disturb sleep              |
| 45 | 8125721000006119 | at risk of copd (chronic obstructive pulmonary disease) exacerbation             |
| 46 | 8235101000006114 | copd (chronic obstructive pulmonary disease) 3 monthly review                    |
| 47 | 8235131000006118 | copd (chronic obstructive pulmonary disease) 6 monthly review                    |
| 48 | 8242561000006112 | cirrhosis associated with cystic fibrosis                                        |
| 49 | 8258171000006110 | bronchiolitis obliterans syndrome after lung transplantation                     |
| 50 | 8260631000006112 | copd (chronic obstructive pulmonary disease) self-management plan review         |
| 51 | 8287171000006115 | acute non-infective exacerbation of copd (chronic obstructive pulmonary disease) |

|    |                  |                                                                      |
|----|------------------|----------------------------------------------------------------------|
| 1  |                  |                                                                      |
| 2  | 83019014         | complicated silicosis                                                |
| 3  | 839001000006111  | copd self-management plan given                                      |
| 4  | 845451000006118  | copd follow-up                                                       |
| 5  | 851261000006116  | chronic bronchitis, acute exac                                       |
| 6  |                  |                                                                      |
| 7  | 85415012         | stannosis                                                            |
| 8  | 85960018         | pulmonary fibrosis                                                   |
| 9  | 85961019         | cirrhosis of lung                                                    |
| 10 | 861571000006118  | lung transplant                                                      |
| 11 | 87088014         | mushroom workers' lung                                               |
| 12 |                  |                                                                      |
| 13 | 87480013         | chronic tracheobronchitis                                            |
| 14 | 885281000006118  | mucopurulent chr. bronchitis                                         |
| 15 | 885331000006110  | coalworker's pneumoconiosis                                          |
| 16 | 885371000006113  | chronic chemical resp. disease                                       |
| 17 | 885431000006115  | radiation lung fibrosis                                              |
| 18 |                  |                                                                      |
| 19 | 885491000006116  | pulmonary fibrosis                                                   |
| 20 | 90511000006115   | transplantation of lung                                              |
| 21 | 907501000006111  | [rfc] pneumoconiosis                                                 |
| 22 | 909711000006111  | [rfc] chronic obstructive pulmonary disease (copd)                   |
| 23 | 909721000006115  | [rfc] emphysema                                                      |
| 24 |                  |                                                                      |
| 25 | 909731000006117  | [rfc] pulmonary fibrosis                                             |
| 26 | 9317331000006113 | asthma-copd overlap syndrome (acos)                                  |
| 27 | 9317341000006115 | acos - asthma-chronic obstructive pulmonary disease overlap syndrome |
| 28 | 9337016          | panlobular emphysema                                                 |
| 29 | 939991000006112  | copd medication review                                               |
| 30 |                  |                                                                      |
| 31 | 966841000006111  | chronic obstructive pulmonary disease clini management plan          |
| 32 | 977891000006112  | copd accident and emergency attendance since last visit              |
| 33 | 977901000006111  | emergency copd admission since last appointment                      |
| 34 | 977911000006114  | number of copd exacerbations in past year                            |
| 35 | 990641000006110  | chronic obst. pulm. dis. nos                                         |
| 36 |                  |                                                                      |
| 37 | 990651000006112  | chr. airway obstruction nos                                          |
| 38 | 998281000006115  | multiple copd emergency hospital admissions                          |
| 39 |                  |                                                                      |
| 40 |                  |                                                                      |
| 41 |                  |                                                                      |
| 42 |                  |                                                                      |
| 43 |                  |                                                                      |
| 44 |                  |                                                                      |
| 45 |                  |                                                                      |
| 46 |                  |                                                                      |
| 47 |                  |                                                                      |
| 48 |                  |                                                                      |
| 49 |                  |                                                                      |
| 50 |                  |                                                                      |
| 51 |                  |                                                                      |
| 52 |                  |                                                                      |
| 53 |                  |                                                                      |
| 54 |                  |                                                                      |
| 55 |                  |                                                                      |
| 56 |                  |                                                                      |
| 57 |                  |                                                                      |
| 58 |                  |                                                                      |
| 59 |                  |                                                                      |
| 60 |                  |                                                                      |

1  
2  
3  
4  
5  
6  
7  
8  
9  
10  
11  
12  
13  
14  
15  
16  
17  
18  
19  
20  
21  
22  
23  
24  
25  
26  
27  
28  
29  
30  
31  
32  
33  
34  
35  
36  
37  
38  
39  
40  
41  
42  
43  
44  
45  
46  
47  
48  
49  
50  
51  
52  
53  
54  
55  
56  
57  
58  
59  
60

For peer review only

1  
2  
3  
4  
5  
6  
7  
8  
9  
10  
11  
12  
13  
14  
15  
16  
17  
18  
19  
20  
21  
22  
23  
24  
25  
26  
27  
28  
29  
30  
31  
32  
33  
34  
35  
36  
37  
38  
39  
40  
41  
42  
43  
44  
45  
46  
47  
48  
49  
50  
51  
52  
53  
54  
55  
56  
57  
58  
59  
60

For peer review only

1  
2  
3  
4  
5  
6  
7  
8  
9  
10  
11  
12  
13  
14  
15  
16  
17  
18  
19  
20  
21  
22  
23  
24  
25  
26  
27  
28  
29  
30  
31  
32  
33  
34  
35  
36  
37  
38  
39  
40  
41  
42  
43  
44  
45  
46  
47  
48  
49  
50  
51  
52  
53  
54  
55  
56  
57  
58  
59  
60

For peer review only



1  
2  
3  
4  
5  
6  
7  
8  
9  
10  
11  
12  
13  
14  
15  
16  
17  
18  
19  
20  
21  
22  
23  
24  
25  
26  
27  
28  
29  
30  
31  
32  
33  
34  
35  
36  
37  
38  
39  
40  
41  
42  
43  
44  
45  
46  
47  
48  
49  
50  
51  
52  
53  
54  
55  
56  
57  
58  
59  
60

For peer review only

1  
2  
3  
4  
5  
6  
7  
8  
9  
10  
11  
12  
13  
14  
15  
16  
17  
18  
19  
20  
21  
22  
23  
24  
25  
26  
27  
28  
29  
30  
31  
32  
33  
34  
35  
36  
37  
38  
39  
40  
41  
42  
43  
44  
45  
46  
47  
48  
49  
50  
51  
52  
53  
54  
55  
56  
57  
58  
59  
60

For peer review only

1  
2  
3  
4  
5  
6  
7  
8  
9  
10  
11  
12  
13  
14  
15  
16  
17  
18  
19  
20  
21  
22  
23  
24  
25  
26  
27  
28  
29  
30  
31  
32  
33  
34  
35  
36  
37  
38  
39  
40  
41  
42  
43  
44  
45  
46  
47  
48  
49  
50  
51  
52  
53  
54  
55  
56  
57  
58  
59  
60

For peer review only

1  
2  
3  
4  
5  
6  
7  
8  
9  
10  
11  
12  
13  
14  
15  
16  
17  
18  
19  
20  
21  
22  
23  
24  
25  
26  
27  
28  
29  
30  
31  
32  
33  
34  
35  
36  
37  
38  
39  
40  
41  
42  
43  
44  
45  
46  
47  
48  
49  
50  
51  
52  
53  
54  
55  
56  
57  
58  
59  
60

For peer review only

1  
2  
3  
4  
5  
6  
7  
8  
9  
10  
11  
12  
13  
14  
15  
16  
17  
18  
19  
20  
21  
22  
23  
24  
25  
26  
27  
28  
29  
30  
31  
32  
33  
34  
35  
36  
37  
38  
39  
40  
41  
42  
43  
44  
45  
46  
47  
48  
49  
50  
51  
52  
53  
54  
55  
56  
57  
58  
59  
60

For peer review only

1  
2  
3  
4  
5  
6  
7  
8  
9  
10  
11  
12  
13  
14  
15  
16  
17  
18  
19  
20  
21  
22  
23  
24  
25  
26  
27  
28  
29  
30  
31  
32  
33  
34  
35  
36  
37  
38  
39  
40  
41  
42  
43  
44  
45  
46  
47  
48  
49  
50  
51  
52  
53  
54  
55  
56  
57  
58  
59  
60

For peer review only

1  
2  
3  
4  
5  
6  
7  
8  
9  
10  
11  
12  
13  
14  
15  
16  
17  
18  
19  
20  
21  
22  
23  
24  
25  
26  
27  
28  
29  
30  
31  
32  
33  
34  
35  
36  
37  
38  
39  
40  
41  
42  
43  
44  
45  
46  
47  
48  
49  
50  
51  
52  
53  
54  
55  
56  
57  
58  
59  
60

For peer review only

e)

1  
2 Procodeid  
3 20041000033117  
4 19841000033111  
5 19941000033115  
6 1714141000033117  
7 1714241000033112  
8 22741000033118  
9 8491641000033114  
10 23641000033119  
11 82541000033119  
12 83741000033117  
13 83641000033114  
14 86441000033116  
15 86541000033115  
16 6029541000033117  
17 130441000033115  
18 131241000033111  
19 128841000033118  
20 139041000033119  
21 161141000033110  
22 160341000033117  
23 1579641000033117  
24 158441000033117  
25 160941000033118  
26 158541000033116  
27 163641000033116  
28 162141000033119  
29 160041000033119  
30 161641000033117  
31 157241000033119  
32 160241000033110  
33 160441000033111  
34 160541000033112  
35 162241000033114  
36 1579541000033118  
37 158641000033115  
38 157341000033112  
39 158841000033119  
40 160641000033113  
41 162741000033115  
42 333541000033115  
43 373641000033117  
44 373741000033114  
45 3198541000033119  
46 3198641000033118  
47 559141000033113  
48 559241000033118  
49 559641000033115  
50 560441000033116  
51 567541000033119

For peer review only



1  
2 567841000033117  
3 569541000033113  
4 563541000033110  
5 1741541000033119  
6 1741641000033118  
7  
8 857241000033112  
9 934741000033118  
10 936341000033114  
11 936241000033116  
12 4499041000033118  
13 4499141000033119  
14 1083841000033113  
15 1084041000033115  
16 1087941000033114  
17 1090741000033111  
18 1143441000033114  
19 1143341000033115  
20 1144641000033113  
21 2622741000033114  
22 1157441000033118  
23 1158041000033114  
24 1163141000033114  
25 1166141000033118  
26 1173741000033115  
27 1172841000033115  
28 1174541000033113  
29 2588241000033119  
30 2086541000033119  
31 1381841000033111  
32 1381941000033115  
33 1221341000033118  
34 1241241000033114  
35 1245841000033110  
36 2640741000033111  
37 1241341000033116  
38 1768141000033111  
39 1245141000033116  
40 5393141000033116  
41 5393241000033111  
42 1257441000033115  
43 1257541000033119  
44 1221441000033112  
45 1751341000033111  
46 4498941000033110  
47 4498841000033119  
48 3343941000033118  
49 1241441000033110  
50 1222341000033110  
51 6116941000033117  
52 1246041000033112

For peer review only

1  
2 2726241000033113  
3 1250141000033112  
4 1228841000033115  
5 1905641000033119  
6 1907541000033112  
7  
8 1257641000033118  
9 1256141000033114  
10 2726341000033115  
11 1250241000033117  
12 1228941000033111  
13  
14 1905741000033111  
15 1682141000033115  
16 1255441000033110  
17 1257741000033110  
18 1241641000033112  
19  
20 6117041000033116  
21 1245741000033117  
22 1242941000033112  
23 1250341000033110  
24 1682241000033110  
25 1255541000033111  
26 2174141000033117  
27 1206041000033115  
28 1206241000033111  
29 1207741000033115  
30  
31 2864041000033119  
32 2952141000033110  
33 1221541000033113  
34 1228341000033112  
35 1228441000033118  
36 1913441000033115  
37 1903141000033113  
38 1907341000033117  
39 1907441000033111  
40 1907641000033113  
41 3344041000033116  
42 1241941000033117  
43 1241541000033111  
44 1905441000033116  
45 1245941000033119  
46 1252241000033118  
47 1252341000033111  
48 1252441000033117  
49 1253341000033115  
50 1255041000033118  
51 1254741000033116  
52 1255341000033116  
53 1256941000033111  
54 1257041000033112  
55  
56 1206441000033112

For peer review only

1  
2 1242441000033119  
3 1242541000033118  
4 1242341000033113  
5 1252141000033113  
6 1254241000033110  
7  
8 1257241000033116  
9 1258641000033117  
10 1258741000033114  
11 1424341000033115  
12  
13 1422641000033118  
14 1699541000033116  
15 1419341000033114  
16 1423441000033112  
17 1419441000033115  
18  
19 1699041000033114  
20 1426741000033111  
21 1915441000033119  
22 1426841000033118  
23 1915341000033113  
24  
25 1422941000033113  
26 1422541000033119  
27 1422741000033110  
28 1422841000033117  
29 1429441000033110  
30  
31 1705641000033112  
32 1705741000033115  
33 1510341000033111  
34 1506841000033119  
35 1510441000033117  
36 1506941000033110  
37  
38 1705441000033110  
39 1509541000033112  
40 1510541000033116  
41 1505741000033119  
42  
43 1512041000033110  
44 1510641000033115  
45 1508241000033119  
46 1509641000033113  
47 1508941000033111  
48  
49 1510241000033118  
50 1513441000033110  
51 1513541000033111  
52 1505941000033116  
53 1508041000033110  
54  
55 1508141000033114  
56 1510741000033112  
57 1511441000033114  
58 1512541000033117  
59 1512641000033116  
60 1526541000033113

For peer review only

1  
2 1526641000033114  
3 20441000033114  
4 20541000033110  
5 88541000033116  
6 88241000033118  
7  
8 3075541000033113  
9 4958541000033110  
10 88341000033111  
11 88441000033117  
12  
13 90041000033110  
14 89441000033110  
15 89941000033117  
16 89841000033113  
17 12430241000033117  
18 773741000033113  
19  
20 4519441000033116  
21 773841000033115  
22 5072941000033118  
23 772841000033113  
24 772641000033112  
25 3075441000033112  
26 4958441000033114  
27 772941000033117  
28 773041000033110  
29 772541000033111  
30 773941000033111  
31 773641000033116  
32 1024041000033114  
33 1022241000033110  
34 1022141000033115  
35 1024141000033113  
36 1672141000033113  
37 1672241000033118  
38 1702541000033116  
39 1702641000033115  
40 13283241000033112  
41 330241000033113  
42 1818641000033117  
43 380841000033118  
44 485841000033117  
45 488041000033119  
46 491541000033117  
47 3163641000033110  
48 1860741000033110  
49 4023941000033117  
50 3163441000033113  
51 5098441000033118  
52 3163541000033114  
53 5098641000033116  
54 13557241000033117

For peer review only

1  
2 2873041000033114  
3 2873141000033113  
4 2873241000033118  
5 2873341000033111  
6 121141000033119  
7 121241000033114  
8 121341000033116  
9 123241000033110  
10 129041000033117  
11 1577941000033118  
12 123441000033111  
13 129241000033113  
14 123341000033117  
15 129141000033118  
16 121641000033112  
17 136641000033115  
18 126641000033118  
19 124041000033116  
20 129341000033115  
21 136741000033112  
22 131641000033114  
23 2725541000033116  
24 3081341000033111  
25 3081041000033114  
26 3082041000033116  
27 3080741000033119  
28 3083041000033113  
29 3082341000033119  
30 3081741000033112  
31 3082841000033111  
32 2725641000033115  
33 3081441000033117  
34 3081141000033113  
35 3082141000033117  
36 3082641000033110  
37 3081641000033115  
38 3942841000033114  
39 3080541000033110  
40 3082441000033113  
41 3080441000033114  
42 3942941000033118  
43 2725741000033112  
44 3081541000033116  
45 3081241000033118  
46 3081941000033110  
47 3082541000033114  
48 3080641000033111  
49 3082941000033115  
50 3082241000033112  
51 3081841000033119

For peer review only

1  
2 3082741000033118  
3 133641000033110  
4 123041000033119  
5 123141000033115  
6 2845741000033112  
7 2845541000033116  
8 2845641000033115  
9 2845441000033117  
10 2845341000033111  
11 1913641000033118  
12 1914041000033110  
13 1913541000033119  
14 123541000033112  
15 123641000033113  
16 123741000033116  
17 126341000033114  
18 126441000033115  
19 126541000033119  
20 1903341000033111  
21 1903441000033117  
22 1903241000033118  
23 1905941000033114  
24 1906041000033116  
25 1905841000033118  
26 1913741000033110  
27 1913841000033117  
28 1913941000033113  
29 2174341000033119  
30 2174441000033113  
31 2174241000033112  
32 2622841000033116  
33 2622941000033112  
34 2623041000033119  
35 129541000033110  
36 128941000033114  
37 121841000033113  
38 129641000033111  
39 129441000033114  
40 130041000033112  
41 1577841000033114  
42 130141000033111  
43 1905541000033115  
44 2845241000033118  
45 2845141000033113  
46 136841000033119  
47 136341000033111  
48 136441000033117  
49 136541000033116  
50 137441000033119  
51 137541000033118

For peer review only

1  
2 137341000033113  
3 139341000033117  
4 139441000033111  
5 139541000033112  
6 139741000033116  
7 137941000033112  
8 136941000033110  
9 126741000033110  
10 137041000033111  
11 126841000033117  
12 137241000033115  
13 126941000033113  
14 136141000033113  
15 136041000033114  
16 123941000033118  
17 129841000033112  
18 137641000033117  
19 131441000033112  
20 137741000033114  
21 138041000033110  
22 123841000033114  
23 129941000033116  
24 137841000033116  
25 139841000033114  
26 121941000033117  
27 121741000033115  
28 5393341000033118  
29 5393441000033112  
30 3871541000033110  
31 4815041000033111  
32 1915241000033115  
33 2726041000033117  
34 2725841000033119  
35 3256341000033119  
36 3141341000033112  
37 3871641000033111  
38 163741000033113  
39 4815141000033110  
40 2726141000033118  
41 2725941000033110  
42 3871741000033119  
43 1915141000033110  
44 163841000033115  
45 1579841000033116  
46 1579941000033112  
47 1580041000033111  
48 2798441000033118  
49 171241000033113  
50 171341000033115  
51 171541000033110

For peer review only

1  
2 171441000033114  
3 171741000033119  
4 171641000033111  
5 174641000033114  
6 174441000033112  
7  
8 174541000033113  
9 4823241000033113  
10 3227441000033112  
11 3227541000033113  
12  
13 3267641000033115  
14 3943341000033113  
15 3943441000033119  
16 3943641000033117  
17 3943041000033111  
18  
19 3343041000033119  
20 3871841000033112  
21 3871941000033116  
22 3872041000033110  
23  
24 576141000033117  
25 576241000033112  
26 576341000033119  
27 1730441000033113  
28 590841000033115  
29 581241000033110  
30  
31 576741000033118  
32 2067541000033118  
33 590941000033111  
34 581341000033117  
35 576841000033111  
36  
37 2067641000033117  
38 585741000033118  
39 1730341000033119  
40 591441000033110  
41 581841000033114  
42  
43 577041000033119  
44 591041000033118  
45 581441000033111  
46 576941000033115  
47  
48 2148541000033119  
49 585641000033110  
50 586241000033117  
51 585841000033111  
52 2067741000033114  
53 2067841000033116  
54  
55 586041000033113  
56 1730541000033114  
57 1730641000033110  
58 2148441000033115  
59 591141000033119  
60 1914841000033115

For peer review only



1  
2 1914441000033118  
3 591241000033114  
4 1914941000033111  
5 1914541000033117  
6 591541000033111  
7  
8 1915041000033111  
9 1914641000033116  
10 591341000033116  
11 1914741000033113  
12 1914341000033112  
13  
14 577141000033115  
15 577241000033110  
16 577341000033117  
17 577441000033111  
18 581541000033112  
19 581641000033113  
20 581741000033116  
21 581941000033118  
22 585941000033115  
23 586341000033110  
24 586141000033112  
25 12530441000033112  
26 12530541000033113  
27 5811241000033111  
28 5811341000033118  
29 2872641000033111  
30 2872841000033112  
31 2872941000033116  
32 2872741000033119  
33 3141441000033118  
34 3256441000033113  
35 1144441000033111  
36 1145341000033116  
37 4815241000033115  
38 1144541000033112  
39 1145141000033119  
40 1143041000033117  
41 4815341000033113  
42 2798341000033112  
43 1145241000033114  
44 1143141000033118  
45 1144341000033117  
46 1144241000033110  
47 1144841000033114  
48 1144941000033118  
49 1670741000033111  
50 1670841000033118  
51 1670941000033114  
52 2623141000033115  
53 2623241000033110  
54  
55  
56  
57  
58  
59  
60

For peer review only

1  
2 2623341000033117  
3 1671341000033119  
4 1671141000033117  
5 3199341000033119  
6 1671241000033112  
7 1671041000033116  
8 3199241000033112  
9 12901441000033118  
10 12901541000033117  
11 12901641000033116  
12 12901341000033112  
13 13740941000033111  
14 13740841000033115  
15 1505841000033112  
16 1510841000033119  
17 1511041000033117  
18 3347141000033113  
19 497341000033117  
20 497441000033111  
21 498041000033115  
22 599641000033111  
23 3089841000033115  
24 3089741000033113  
25 3347041000033114  
26 3089641000033116  
27 4063341000033111  
28 4063241000033118  
29 4063541000033116  
30 5707041000033111  
31 5707141000033110  
32 6456541000033118  
33 9299341000033119  
34 5707241000033115  
35 5707341000033113  
36 1022341000033117  
37 1022441000033111  
38 5140041000033112  
39 5140141000033111  
40 1206341000033118  
41 3855941000033115  
42 1252041000033114  
43 1914241000033119  
44 1914141000033114  
45 1205941000033113  
46 1228741000033113  
47 3856041000033113  
48 1267641000033111  
49 1272941000033113  
50 1268941000033117  
51 1267441000033114

For peer review only

1 11782841000033117  
2 9299441000033113  
3 8536141000033111  
4 13179041000033114  
5 13178941000033117  
6 3347141000033113  
7 497341000033117  
8 497441000033111  
9 498041000033115  
10 599641000033111  
11 3089841000033115  
12 3089741000033113  
13 3347041000033114  
14 3089641000033116  
15 4063341000033111  
16 4063241000033118  
17 4063541000033116  
18 5707041000033111  
19 5707141000033110  
20 6456541000033118  
21 9299341000033119  
22 5707241000033115  
23 5707341000033113  
24 1022341000033117  
25 1022441000033111  
26 5140041000033112  
27 5140141000033111  
28 1206341000033118  
29 3855941000033115  
30 1252041000033114  
31 1914241000033119  
32 1914141000033114  
33 1205941000033113  
34 1228741000033113  
35 3856041000033113  
36 1267641000033111  
37 1272941000033113  
38 1268941000033117  
39 1267441000033114  
40 11782841000033117  
41 9299441000033113  
42 8536141000033111  
43 13179041000033114  
44 13178941000033117  
45 11899741000033117  
46 12197841000033113  
47 12197941000033117  
48 10715041000033111  
49 12370841000033110  
50 12370941000033119

For peer review only

1  
2 9531441000033113  
3 4418141000033112  
4 10735041000033115  
5 10740041000033111  
6 3164341000033116  
7 3164441000033110  
8 11707241000033115  
9 3164541000033111  
10 12579441000033119  
11 12579541000033118  
12 12579341000033113  
13 9342741000033111  
14 9342841000033118  
15 12634941000033116  
16 8101741000033115  
17 3163841000033111  
18 8101841000033113  
19 3163941000033115  
20 12635041000033116  
21 8101641000033112  
22 3163741000033118  
23 8946841000033112  
24 8946941000033116  
25 3164041000033118  
26 3164141000033119  
27 3164241000033114  
28 8102041000033111  
29 8102141000033110  
30 8101941000033117  
31 12635141000033117  
32 12635241000033112  
33 12430741000033111  
34 12403741000033110  
35 12434441000033111  
36 4418241000033117  
37 10740141000033110  
38 9537441000033115  
39 10735141000033116  
40 12529241000033119  
41 12529341000033112  
42 8947041000033115  
43 8947141000033116  
44 12046641000033114  
45 12046741000033117  
46 1752141000033117  
47 2147341000033110  
48 1752241000033112  
49 2147441000033116  
50 2147241000033117  
51 1752341000033119

For peer review only

1  
2 10387141000033115  
3 10387241000033110  
4 12901741000033113  
5 2587541000033118  
6 2587641000033117  
7  
8 11707341000033113  
9 2905641000033115  
10 5140741000033110  
11 8028941000033114  
12 5140541000033119  
13 13743941000033118  
14 13743741000033116  
15 9293241000033114  
16 9293341000033116  
17 12364641000033110  
18 12431141000033117  
19 57441000033114  
20 61441000033113  
21 51841000033118  
22 59941000033110  
23 53241000033116  
24 57541000033110  
25 54441000033118  
26 54341000033112  
27 147941000033113  
28 148041000033111  
29 151141000033115  
30 247441000033117  
31 249841000033112  
32 249941000033116  
33 248241000033117  
34 615441000033115  
35 615341000033114  
36 816741000033113  
37 2105141000033110  
38 993541000033118  
39 992241000033110  
40 993641000033117  
41 993941000033112  
42 1067641000033116  
43 1080341000033111  
44 1080441000033117  
45 1076441000033111  
46 1111341000033112  
47 1258941000033112  
48 1346041000033119  
49 1346141000033115  
50 1346241000033110  
51 1416841000033112  
52 1425741000033118

For peer review only

1  
2 1433241000033113  
3 1433041000033117  
4 1433141000033118  
5 1433341000033115  
6 1429541000033111  
7  
8 1434741000033116  
9 1433541000033110  
10 1432941000033110  
11 1429641000033112  
12  
13 1830241000033110  
14 1436141000033114  
15 1436041000033110  
16 9203041000033115  
17 12468241000033113  
18 1429741000033115  
19  
20 1431441000033113  
21 12666141000033117  
22 12666241000033112  
23 5917241000033112  
24 5917641000033110  
25  
26  
27  
28  
29  
30  
31  
32  
33  
34  
35  
36  
37  
38  
39  
40  
41  
42  
43  
44  
45  
46  
47  
48  
49  
50  
51  
52  
53  
54  
55  
56  
57  
58  
59  
60

For peer review only



1 Fenoterol Hydrobromide Inhaler 100 micrograms/puff  
2 Fenoterol Hydrobromide Solution 5 mg/ml  
3 Fenoterol Hydrobromide With Extension Aerosol inhalation 200 micrograms/puff  
4 Maxivent 2.5mg/2.5ml nebuliser liquid unit dose Steripoule vials (Ashbourne Pharmaceuticals Ltd)  
5 Maxivent 5mg/2.5ml nebuliser liquid unit dose Steripoule vials (Ashbourne Pharmaceuticals Ltd)  
6 Maxivent Inhaler 100 micrograms/puff  
7 Monovent 1.5mg/5ml syrup (Sandoz Ltd)  
8 Monovent Sa Tablets 7.5 mg  
9 Monovent Tablets 5 mg  
10 Novolizer Salbulin Inhalation Cartridge + Device 100 micrograms/dose  
11 Novolizer Salbulin Inhalation Cartridge Refill 100 micrograms/dose  
12 Pirbuterol Capsules 10 mg  
13 Pirbuterol Capsules 15 mg  
14 Pirbuterol Inhaler 200 micrograms/puff  
15 Pirbuterol Syrup 7.5 mg/5 ml  
16 Pulmadil Auto Inhaler 200 micrograms/puff  
17 Pulmadil Inhaler 200 micrograms/puff  
18 Pulmadil Refill 200 micrograms/puff  
19 Pulvinal Salbutamol 200micrograms/dose dry powder inhaler (Chiesi Ltd)  
20 Reproterol Hydrochloride Elixir 10 mg/5 ml  
21 Reproterol Hydrochloride Inhaler 500 micrograms/puff  
22 Reproterol Hydrochloride Respirator solution 10 mg/ml  
23 Reproterol Hydrochloride Tablets 20 mg  
24 Rimiterol Hydrobromide Auto Inhaler 200 micrograms/puff  
25 Rimiterol Hydrobromide Inhaler 200 micrograms/puff  
26 Rimiterol Hydrobromide Refill 200 micrograms/puff  
27 Salamol 100micrograms/dose Easi-Breathe inhaler (Teva UK Ltd)  
28 Salamol 100micrograms/dose inhaler CFC free (Teva UK Ltd)  
29 Salamol 2.5mg/2.5ml nebuliser liquid Steri-Neb unit dose vials (Teva UK Ltd)  
30 Salamol 5mg/2.5ml nebuliser liquid Steri-Neb unit dose vials (Teva UK Ltd)  
31 Salamol Easi-Breathe Breath-actuated inhaler 100 micrograms/puff  
32 Salamol Inhaler 100 micrograms/puff  
33 Salamol Nebuliser solution 2.5 mg/2.5 ml  
34 Salapin 2mg/5ml syrup (Pinewood Healthcare)  
35 Salbulin 100micrograms/dose inhaler (3M Health Care Ltd)  
36 Salbulin Cfc-free inhaler 100 micrograms/puff  
37 Salbulin Liquid 2 mg/5 ml  
38 Salbulin Novolizer 100micrograms/dose inhalation powder (Meda Pharmaceuticals Ltd)  
39 Salbulin Novolizer 100micrograms/dose inhalation powder refill (Meda Pharmaceuticals Ltd)  
40 Salbulin Tablets 2 mg  
41 Salbulin Tablets 4 mg  
42 Salbutamol 100micrograms/dose breath actuated inhaler  
43 Salbutamol 100micrograms/dose breath actuated inhaler CFC free  
44 Salbutamol 100micrograms/dose dry powder inhalation cartridge  
45 Salbutamol 100micrograms/dose dry powder inhalation cartridge with device  
46 Salbutamol 100micrograms/dose dry powder inhaler  
47 Salbutamol 100micrograms/dose inhaler  
48 Salbutamol 100micrograms/dose inhaler CFC free  
49 Salbutamol 100micrograms/dose inhaler CFC free  
50 Salbutamol 2.5mg/2.5ml nebuliser liquid unit dose Steripoule vials (Galen Ltd)  
51 Salbutamol 2.5mg/2.5ml nebuliser liquid unit dose vials



- 1 Salbutamol 200 Cyclocaps (Teva UK Ltd)
- 2 Salbutamol 200microgram inhalation powder blisters
- 3 Salbutamol 200microgram inhalation powder blisters with device
- 4 Salbutamol 200microgram inhalation powder capsules
- 5 Salbutamol 200micrograms/dose dry powder inhaler
- 6 Salbutamol 2mg tablets
- 7 Salbutamol 2mg/5ml oral solution sugar free
- 8 Salbutamol 400 Cyclocaps (Teva UK Ltd)
- 9 Salbutamol 400microgram inhalation powder blisters
- 10 Salbutamol 400microgram inhalation powder blisters with device
- 11 Salbutamol 400microgram inhalation powder capsules
- 12 Salbutamol 4mg modified-release capsules
- 13 Salbutamol 4mg modified-release tablets
- 14 Salbutamol 4mg tablets
- 15 Salbutamol 500micrograms/1ml solution for injection ampoules
- 16 Salbutamol 5mg/2.5ml nebuliser liquid unit dose Steripoule vials (Galen Ltd)
- 17 Salbutamol 5mg/2.5ml nebuliser liquid unit dose vials
- 18 Salbutamol 5mg/5ml solution for infusion ampoules
- 19 Salbutamol 5mg/ml nebuliser liquid
- 20 Salbutamol 8mg modified-release capsules
- 21 Salbutamol 8mg modified-release tablets
- 22 Salbutamol 95micrograms/dose dry powder inhaler
- 23 Salbutamol Accuhaler 200 micrograms/dose
- 24 Salbutamol Aerosol inhalation 100 micrograms/metered inhalation
- 25 Salbutamol Autohaler 100 micrograms/puff
- 26 Salbutamol Breath Actuated Pressurised Inhalation 100 micrograms/actuation
- 27 Salbutamol Breath Actuated Pressurised Inhalation, Cfc-free 100 micrograms/actuation
- 28 Salbutamol Breath-actuated inhaler 95 micrograms/dose
- 29 Salbutamol Cyclocaps 200 micrograms
- 30 Salbutamol Cyclocaps 400 micrograms
- 31 Salbutamol Dry powder breath-actuated inhaler 200 micrograms
- 32 Salbutamol Dry powder breath-actuated inhaler 95 micrograms/dose
- 33 Salbutamol Dry powder disks + disk inhaler 200 micrograms
- 34 Salbutamol Dry powder disks + disk inhaler 400 micrograms
- 35 Salbutamol Dry powder for inhalation 400 micrograms/dose
- 36 Salbutamol Dry Powder Inhaler 200 micrograms/actuation, 200 dose
- 37 Salbutamol Inhaler with vortex generating actuator 100 micrograms/dose
- 38 Salbutamol Injection 50 micrograms/ml
- 39 Salbutamol Insufflator type 4
- 40 Salbutamol Nebules 0.1 %
- 41 Salbutamol Rotacaps 200 micrograms
- 42 Salbutamol Rotacaps 400 micrograms
- 43 Salbutamol Rotahaler 1
- 44 Salbutamol Sf syrup 2 mg/5 ml
- 45 Salbutamol Spacehaler 100 micrograms/puff
- 46 Salbutamol Spandets 8 mg
- 47 Salbutamol Sr Spandet(s) 8 mg
- 48 Salbutamol Syrup 1 mg/5 ml
- 49 Salbutamol Syrup 2 mg/5 ml
- 50 Salbuvent Aerosol inhalation 100mcg/inhalation

1 Salbuvent Injection 500mcg/ml  
2 Salbuvent Injection 50mcg/ml  
3 Salbuvent Injection 50mg/ml  
4 Salbuvent Respirator solution 5mg/ml  
5 Salbuvent Solution for intravenous infusion 1mg/ml  
6 Salbuvent Syrup 2mg/5 ml  
7 Salbuvent Tablets 2 mg  
8 Salbuvent Tablets 4 mg  
9 Terbutaline 1.5mg/5ml oral solution sugar free  
10 Terbutaline 10mg/ml nebuliser liquid  
11 Terbutaline 2.5mg/5ml solution for injection ampoules  
12 Terbutaline 250micrograms/dose inhaler  
13 Terbutaline 250micrograms/dose inhaler with spacer  
14 Terbutaline 500micrograms/1ml solution for injection ampoules  
15 Terbutaline 500micrograms/dose dry powder inhaler  
16 Terbutaline 5mg tablets  
17 Terbutaline 5mg/2ml nebuliser liquid unit dose vials  
18 Terbutaline 7.5mg modified-release tablets  
19 Terbutaline Nebulisation single dose unit 5 mg/2 ml  
20 Terbutaline Respules 5 mg/2 ml  
21 Terbutaline Sulfate Refill canister 250 micrograms/puff  
22 Terbutaline Sulfate Respirator solution 2.5 mg/ml  
23 Terbutaline Sulfate Respules 5 mg/2 ml  
24 Terbutaline Sulfate Turbohaler 500 micrograms/dose  
25 Ventmax SR 4mg capsules (Chiesi Ltd)  
26 Ventmax SR 8mg capsules (Chiesi Ltd)  
27 Ventodisks 200microgram (GlaxoSmithKline UK Ltd)  
28 Ventodisks 200microgram with Diskhaler (GlaxoSmithKline UK Ltd)  
29 Ventodisks 400microgram (GlaxoSmithKline UK Ltd)  
30 Ventodisks 400microgram with Diskhaler (GlaxoSmithKline UK Ltd)  
31 Ventolin 100micrograms/dose Evohaler (GlaxoSmithKline UK Ltd)  
32 Ventolin 2.5mg Nebules (GlaxoSmithKline UK Ltd)  
33 Ventolin 200microgram Rotacaps (GlaxoSmithKline UK Ltd)  
34 Ventolin 200micrograms/dose Accuhaler (GlaxoSmithKline UK Ltd)  
35 Ventolin 2mg/5ml syrup (GlaxoSmithKline UK Ltd)  
36 Ventolin 400microgram Rotacaps (GlaxoSmithKline UK Ltd)  
37 Ventolin 500micrograms/1ml solution for injection ampoules (GlaxoSmithKline UK Ltd)  
38 Ventolin 5mg Nebules (GlaxoSmithKline UK Ltd)  
39 Ventolin 5mg/5ml solution for infusion ampoules (GlaxoSmithKline UK Ltd)  
40 Ventolin 5mg/ml respirator solution (GlaxoSmithKline UK Ltd)  
41 Ventolin Cr S/r tablets 4 mg  
42 Ventolin Cr S/r tablets 8 mg  
43 Ventolin Easi-Breathe Breath-actuated inhaler 100 micrograms/puff  
44 Ventolin Inhaler 100 micrograms/puff  
45 Ventolin Injection 50 micrograms/ml  
46 Ventolin Rotahaler (GlaxoSmithKline UK Ltd)  
47 Ventolin Spandets 8 mg  
48 Ventolin Tablets 2 mg  
49 Ventolin Tablets 4 mg  
50 Volmax 4mg modified-release tablets (GlaxoSmithKline UK Ltd)

1 Volmax 8mg modified-release tablets (GlaxoSmithKline UK Ltd)  
2 Aerocrom inhaler (Castlemead Healthcare Ltd)  
3 Aerocrom Syncroner with spacer (Castlemead Healthcare Ltd)  
4 Atrovent 20micrograms/dose Autohaler (Boehringer Ingelheim Ltd)  
5 Atrovent 20micrograms/dose inhaler (Boehringer Ingelheim Ltd)  
6 Atrovent 20micrograms/dose inhaler CFC free (Boehringer Ingelheim Ltd)  
7 Atrovent 250micrograms/1ml nebuliser liquid UDV's (Boehringer Ingelheim Ltd)  
8 Atrovent 40microgram Aerocaps (Boehringer Ingelheim Ltd)  
9 Atrovent 40microgram Aerocaps with Aerohaler (Boehringer Ingelheim Ltd)  
10 Atrovent 500micrograms/2ml nebuliser liquid UDV's (Boehringer Ingelheim Ltd)  
11 Atrovent Forte 40micrograms/dose inhaler (Boehringer Ingelheim Ltd)  
12 Atrovent Nebules 500mcgs/2 ml  
13 Atrovent Nebuliser solution 250 micrograms/ml  
14 Inhalvent 20micrograms/dose inhaler (Alissa Healthcare Research Ltd)  
15 Ipratropium 250micrograms/1ml nebuliser liquid Steri-Neb unit dose vials (Teva UK Ltd)  
16 Ipratropium 250micrograms/1ml nebuliser liquid unit dose Steripoule vials (Galen Ltd)  
17 Ipratropium 500micrograms/2ml nebuliser liquid Steri-Neb unit dose vials (Teva UK Ltd)  
18 Ipratropium 500micrograms/2ml nebuliser liquid unit dose Steripoule vials (Galen Ltd)  
19 Ipratropium bromide 20micrograms/dose breath actuated inhaler  
20 Ipratropium bromide 20micrograms/dose inhaler  
21 Ipratropium bromide 20micrograms/dose inhaler CFC free  
22 Ipratropium bromide 250micrograms/1ml nebuliser liquid unit dose vials  
23 Ipratropium bromide 40microgram inhalation powder capsules  
24 Ipratropium bromide 40microgram inhalation powder capsules with device  
25 Ipratropium bromide 40micrograms/dose inhaler  
26 Ipratropium bromide 500micrograms/2ml nebuliser liquid unit dose vials  
27 Ipratropium Bromide Nebuliser solution 250 micrograms/ml  
28 Oxitropium bromide 100micrograms/dose inhaler  
29 Oxitropium Bromide Autohaler 100 micrograms/puff  
30 Oxivent 100micrograms/dose Autohaler (Boehringer Ingelheim Ltd)  
31 Oxivent 100micrograms/dose inhaler (Boehringer Ingelheim Ltd)  
32 Respontin 250micrograms/1ml Nebules (GlaxoSmithKline UK Ltd)  
33 Respontin 500micrograms/2ml Nebules (GlaxoSmithKline UK Ltd)  
34 Tropiovent 250micrograms/1ml nebuliser liquid unit dose Steripoule vials (Ashbourne Pharmaceuticals Ltd)  
35 Tropiovent 500micrograms/2ml nebuliser liquid unit dose Steripoule vials (Ashbourne Pharmaceuticals Ltd)  
36 Ipravent 20micrograms/dose inhaler CFC free (Cipla EU Ltd)  
37 Combivent inhaler (Boehringer Ingelheim Ltd)  
38 Combivent nebuliser liquid 2.5ml UDV's (Boehringer Ingelheim Ltd)  
39 Combivent Nebuliser solution  
40 Duovent Autohaler (Boehringer Ingelheim Ltd)  
41 Duovent inhaler (Boehringer Ingelheim Ltd)  
42 Duovent UDV's nebuliser liquid 4ml (Boehringer Ingelheim Ltd)  
43 Fenoterol 1.25mg/4ml / Ipratropium 500micrograms/4ml nebuliser liquid unit dose vials  
44 Fenoterol 100micrograms/dose / Ipratropium 40micrograms/dose inhaler  
45 Ipramol nebuliser solution 2.5ml Steri-Neb unit dose vials (Teva UK Ltd)  
46 Salbutamol 100micrograms/dose / Ipratropium 20micrograms/dose inhaler  
47 Salbutamol 2.5mg/2.5ml / Ipratropium bromide 500micrograms/2.5ml nebuliser liquid ampoules  
48 Salbutamol 2.5mg/2.5ml / Ipratropium bromide 500micrograms/2.5ml nebuliser liquid unit dose vials  
49 Salipraneb 0.5mg/2.5mg nebuliser solution 2.5ml ampoules (Actavis UK Ltd)  
50 Combiprasal 0.5mg/2.5mg nebuliser solution 2.5ml unit dose vials (TriOn Pharma Ltd)

1 Asmanex Twisthaler Dry Powder Inhaler 200 micrograms/dose, 30 doses  
2 Asmanex Twisthaler Dry Powder Inhaler 200 micrograms/dose, 60 doses  
3 Asmanex Twisthaler Dry Powder Inhaler 400 micrograms/dose, 30 doses  
4 Asmanex Twisthaler Dry Powder Inhaler 400 micrograms/dose, 60 doses  
5 Bdp Spacehaler 100 micrograms/puff  
6 Bdp Spacehaler 250 micrograms/puff  
7 Bdp Spacehaler 50 micrograms/puff  
8 Beclazone 100 Easi-Breathe inhaler (Teva UK Ltd)  
9 Beclazone 100 inhaler (Teva UK Ltd)  
10 Beclazone 200 inhaler (Teva UK Ltd)  
11 Beclazone 250 Easi-Breathe inhaler (Teva UK Ltd)  
12 Beclazone 250 inhaler (Teva UK Ltd)  
13 Beclazone 50 Easi-Breathe inhaler (Teva UK Ltd)  
14 Beclazone 50 inhaler (Teva UK Ltd)  
15 Becloforte 250micrograms/dose inhaler (GlaxoSmithKline UK Ltd)  
16 Becloforte 400microgram disks (GlaxoSmithKline UK Ltd)  
17 Becloforte 400microgram disks with Diskhaler (GlaxoSmithKline UK Ltd)  
18 Becloforte Easi-Breathe Breath-actuated inhaler 250 micrograms/puff  
19 Becloforte Integra Inhaler with spacer device 250 micrograms/puff  
20 Becloforte Integra Refill 250 micrograms/puff  
21 Becloforte Vm Inhalers and volumatic 250 micrograms/puff  
22 Beclometasone 100 Cyclocaps (Teva UK Ltd)  
23 Beclometasone 100microgram inhalation powder blisters  
24 Beclometasone 100microgram inhalation powder blisters with device  
25 Beclometasone 100microgram inhalation powder capsules  
26 Beclometasone 100micrograms/dose breath actuated inhaler  
27 Beclometasone 100micrograms/dose breath actuated inhaler CFC free  
28 Beclometasone 100micrograms/dose dry powder inhaler  
29 Beclometasone 100micrograms/dose inhaler  
30 Beclometasone 100micrograms/dose inhaler CFC free  
31 Beclometasone 200 Cyclocaps (Teva UK Ltd)  
32 Beclometasone 200microgram inhalation powder blisters  
33 Beclometasone 200microgram inhalation powder blisters with device  
34 Beclometasone 200microgram inhalation powder capsules  
35 Beclometasone 200micrograms/dose dry powder inhaler  
36 Beclometasone 200micrograms/dose inhaler  
37 Beclometasone 200micrograms/dose inhaler CFC free  
38 Beclometasone 250micrograms/dose breath actuated inhaler  
39 Beclometasone 250micrograms/dose dry powder inhaler  
40 Beclometasone 250micrograms/dose inhaler  
41 Beclometasone 250micrograms/dose inhaler CFC free  
42 Beclometasone 400 Cyclocaps (Teva UK Ltd)  
43 Beclometasone 400microgram inhalation powder blisters  
44 Beclometasone 400microgram inhalation powder blisters with device  
45 Beclometasone 400microgram inhalation powder capsules  
46 Beclometasone 400micrograms/dose dry powder inhaler  
47 Beclometasone 50micrograms/dose breath actuated inhaler  
48 Beclometasone 50micrograms/dose breath actuated inhaler CFC free  
49 Beclometasone 50micrograms/dose dry powder inhaler  
50 Beclometasone 50micrograms/dose inhaler

1 Beclometasone 50micrograms/dose inhaler CFC free  
2 Beclomethasone Dipropionate Aqueous nasal spray 50 micrograms/dose  
3 Beclomethasone Dipropionate Autohaler 250 micrograms/puff  
4 Beclomethasone Dipropionate Autohaler 50 micrograms/puff  
5 Beclomethasone Dipropionate Breath Actuated Pressurised Inhalation 100 micrograms/actuation  
6 Beclomethasone Dipropionate Breath Actuated Pressurised Inhalation 250 micrograms/actuation  
7 Beclomethasone Dipropionate Breath Actuated Pressurised Inhalation 50 micrograms/actuation  
8 Beclomethasone Dipropionate Breath Actuated Pressurised Inhalation, Cfc-free 100 micrograms/actuation  
9 Beclomethasone Dipropionate Breath Actuated Pressurised Inhalation, Cfc-free 50 micrograms/actuation  
10 Beclomethasone Dipropionate Breath-actuated aerosol inhaler 100 micrograms  
11 Beclomethasone Dipropionate Breath-actuated aerosol inhaler 250 micrograms  
12 Beclomethasone Dipropionate Breath-actuated aerosol inhaler 50 micrograms  
13 Beclomethasone Dipropionate Breath-actuated inhaler 100 micrograms/puff  
14 Beclomethasone Dipropionate Breath-actuated inhaler 250 micrograms/puff  
15 Beclomethasone Dipropionate Breath-actuated inhaler 50 micrograms/puff  
16 Beclomethasone Dipropionate Disks with diskhaler 100 micrograms/dose  
17 Beclomethasone Dipropionate Disks with diskhaler 200 micrograms/dose  
18 Beclomethasone Dipropionate Disks with diskhaler 400 micrograms/dose  
19 Beclomethasone Dipropionate Dry powder breath-actuated inhaler 100 micrograms/dose  
20 Beclomethasone Dipropionate Dry powder breath-actuated inhaler 250 micrograms/dose  
21 Beclomethasone Dipropionate Dry powder breath-actuated inhaler 50 micrograms/dose  
22 Beclomethasone Dipropionate Dry powder capsules for inhalation 100 micrograms  
23 Beclomethasone Dipropionate Dry powder capsules for inhalation 200 micrograms  
24 Beclomethasone Dipropionate Dry powder capsules for inhalation 400 micrograms  
25 Beclomethasone Dipropionate Dry powder disks + disk inhaler 100 micrograms  
26 Beclomethasone Dipropionate Dry powder disks + disk inhaler 200 micrograms  
27 Beclomethasone Dipropionate Dry powder disks + disk inhaler 400 micrograms  
28 Beclomethasone Dipropionate Dry powder for inhalation 100 micrograms/metered actuation  
29 Beclomethasone Dipropionate Dry powder for inhalation 250 micrograms/metered actuation  
30 Beclomethasone Dipropionate Dry powder for inhalation 50 micrograms/metered actuation  
31 Beclomethasone Dipropionate Dry Powder Inhaler 100 micrograms/metered dose  
32 Beclomethasone Dipropionate Dry Powder Inhaler 200 micrograms/metered dose  
33 Beclomethasone Dipropionate Dry Powder Inhaler 400 micrograms/metered dose  
34 Beclomethasone Dipropionate Inhaler 100 micrograms/puff  
35 Beclomethasone Dipropionate Inhaler 200 micrograms/puff  
36 Beclomethasone Dipropionate Inhaler 250 micrograms/puff  
37 Beclomethasone Dipropionate Inhaler 50 micrograms/puff  
38 Beclomethasone Dipropionate Inhaler with spacer device 250 micrograms/puff  
39 Beclomethasone Dipropionate Inhaler with vortex generating actuator 100 micrograms/dose  
40 Beclomethasone Dipropionate Inhaler with vortex generating actuator 250 micrograms/dose  
41 Beclomethasone Dipropionate Inhaler with vortex generating actuator 50 micrograms/dose  
42 Beclomethasone Dipropionate Insufflator type 4  
43 Beclomethasone Dipropionate Pressurised Inhalation, Cfc-free 100 micrograms/actuation  
44 Beclomethasone Dipropionate Pressurised Inhalation, Cfc-free 50 micrograms/actuation  
45 Beclomethasone Dipropionate Refill 250 micrograms/puff  
46 Beclomethasone Dipropionate Refill disks 100 micrograms/dose  
47 Beclomethasone Dipropionate Refill disks 200 micrograms/dose  
48 Beclomethasone Dipropionate Refill disks 400 micrograms/dose  
49 Beclomethasone Dipropionate Rotacaps 100 micrograms  
50 Beclomethasone Dipropionate Rotacaps 200 micrograms



1 Beclomethasone Dipropionate Rotacaps 400 micrograms  
2 Beclomethasone Dipropionate Spacehaler 100 micrograms/puff  
3 Beclomethasone Dipropionate Spacehaler 250 micrograms/puff  
4 Beclomethasone Dipropionate Spacehaler 50 micrograms/puff  
5 Beclomethasone Dipropionate Suspension 50 micrograms/ml  
6 Beclomethasone Rotahaler  
7  
8 Becodisks 100microgram (GlaxoSmithKline UK Ltd)  
9 Becodisks 100microgram with Diskhaler (GlaxoSmithKline UK Ltd)  
10 Becodisks 200microgram (GlaxoSmithKline UK Ltd)  
11 Becodisks 200microgram with Diskhaler (GlaxoSmithKline UK Ltd)  
12 Becodisks 400microgram (GlaxoSmithKline UK Ltd)  
13 Becodisks 400microgram with Diskhaler (GlaxoSmithKline UK Ltd)  
14 Becodisks Refill Powder 400 micrograms  
15 Becodisks With Diskhaler Powder 400 micrograms  
16 Becotide 100 Easi-Breathe Breath-actuated inhaler 100 micrograms/puff  
17 Becotide 100 inhaler (GlaxoSmithKline UK Ltd)  
18 Becotide 100microgram Rotacaps (GlaxoSmithKline UK Ltd)  
19 Becotide 200 inhaler (GlaxoSmithKline UK Ltd)  
20 Becotide 200microgram Rotacaps (GlaxoSmithKline UK Ltd)  
21 Becotide 400microgram Rotacaps (GlaxoSmithKline UK Ltd)  
22 Becotide 50 Easi-Breathe Breath-actuated inhaler 50 micrograms/puff  
23 Becotide 50 inhaler (GlaxoSmithKline UK Ltd)  
24 Becotide Rotahaler (GlaxoSmithKline UK Ltd)  
25 Becotide Suspension 50 micrograms/ml  
26 Betamethasone Valerate Aerosol inhalation 100 micrograms/metered inhalation  
27 Bextasol Aerosol inhalation 100 micrograms/metered inhalation  
28 Budelin Novolizer 200micrograms/dose inhalation powder (Meda Pharmaceuticals Ltd)  
29 Budelin Novolizer 200micrograms/dose inhalation powder refill (Meda Pharmaceuticals Ltd)  
30 Budesonide 100micrograms/dose dry powder inhaler  
31 Budesonide 100micrograms/dose inhaler CFC free  
32 Budesonide 1mg/2ml nebuliser liquid unit dose vials  
33 Budesonide 200 Cyclocaps (Teva UK Ltd)  
34 Budesonide 200microgram inhalation powder capsules  
35 Budesonide 200micrograms/dose dry powder inhalation cartridge  
36 Budesonide 200micrograms/dose dry powder inhalation cartridge with device  
37 Budesonide 200micrograms/dose dry powder inhaler  
38 Budesonide 200micrograms/dose inhaler  
39 Budesonide 200micrograms/dose inhaler CFC free  
40 Budesonide 400 Cyclocaps (Teva UK Ltd)  
41 Budesonide 400microgram inhalation powder capsules  
42 Budesonide 400micrograms/dose dry powder inhaler  
43 Budesonide 500micrograms/2ml nebuliser liquid unit dose vials  
44 Budesonide 50micrograms/dose inhaler  
45 Budesonide Breath-Actuated Dry Powder Inhaler 100 micrograms/dose  
46 Budesonide Breath-Actuated Dry Powder Inhaler 200 micrograms/dose  
47 Budesonide Breath-Actuated Dry Powder Inhaler 400 micrograms/dose  
48 Budesonide Inhaler with spacer device 200 micrograms/dose  
49 Budesonide Refill canister 200 micrograms/dose  
50 Budesonide Refill canister 50 micrograms/dose  
51 Budesonide Respules 1 mg/2 ml single dose unit

1 Budesonide Respules 500 micrograms/2 ml single dose unit  
2 Budesonide Spacer inhaler 200 micrograms/dose  
3 Budesonide Spacer inhaler 50 micrograms/dose  
4 Budesonide Turbohaler 100 micrograms/dose  
5 Budesonide Turbohaler 200 micrograms/dose  
6 Budesonide Turbohaler 400 micrograms/dose  
7 Ciclesonide 160micrograms/dose inhaler CFC free  
8 Ciclesonide 80micrograms/dose inhaler CFC free  
9 Ciclesonide Cfc-free inhaler 160 micrograms/actuation, 120 doses  
10 Ciclesonide Cfc-free inhaler 160 micrograms/actuation, 60 doses  
11 Clenil Modulite 100micrograms/dose inhaler (Chiesi Ltd)  
12 Clenil Modulite 200micrograms/dose inhaler (Chiesi Ltd)  
13 Clenil Modulite 250micrograms/dose inhaler (Chiesi Ltd)  
14 Clenil Modulite 50micrograms/dose inhaler (Chiesi Ltd)  
15 Easyhaler Beclometasone 200micrograms/dose dry powder inhaler (Orion Pharma (UK) Ltd)  
16 Easyhaler Budesonide 100micrograms/dose dry powder inhaler (Orion Pharma (UK) Ltd)  
17 Easyhaler Budesonide 200micrograms/dose dry powder inhaler (Orion Pharma (UK) Ltd)  
18 Easyhaler Budesonide 400micrograms/dose dry powder inhaler (Orion Pharma (UK) Ltd)  
19 Filair 100 inhaler (Meda Pharmaceuticals Ltd)  
20 Filair 50 inhaler (Meda Pharmaceuticals Ltd)  
21 Filair Forte 250micrograms/dose inhaler (Meda Pharmaceuticals Ltd)  
22 Flixotide 0.5mg/2ml Nebules (GlaxoSmithKline UK Ltd)  
23 Flixotide 100microgram disks (GlaxoSmithKline UK Ltd)  
24 Flixotide 100microgram disks with Diskhaler (GlaxoSmithKline UK Ltd)  
25 Flixotide 100micrograms/dose Accuhaler (GlaxoSmithKline UK Ltd)  
26 Flixotide 125micrograms/dose Evohaler (GlaxoSmithKline UK Ltd)  
27 Flixotide 250microgram disks (GlaxoSmithKline UK Ltd)  
28 Flixotide 250microgram disks with Diskhaler (GlaxoSmithKline UK Ltd)  
29 Flixotide 250micrograms/dose Accuhaler (GlaxoSmithKline UK Ltd)  
30 Flixotide 250micrograms/dose Evohaler (GlaxoSmithKline UK Ltd)  
31 Flixotide 25micrograms/dose inhaler (GlaxoSmithKline UK Ltd)  
32 Flixotide 2mg/2ml Nebules (GlaxoSmithKline UK Ltd)  
33 Flixotide 500microgram disks (GlaxoSmithKline UK Ltd)  
34 Flixotide 500microgram disks with Diskhaler (GlaxoSmithKline UK Ltd)  
35 Flixotide 500micrograms/dose Accuhaler (GlaxoSmithKline UK Ltd)  
36 Flixotide 50microgram disks (GlaxoSmithKline UK Ltd)  
37 Flixotide 50microgram disks with Diskhaler (GlaxoSmithKline UK Ltd)  
38 Flixotide 50micrograms/dose Accuhaler (GlaxoSmithKline UK Ltd)  
39 Flixotide 50micrograms/dose Evohaler (GlaxoSmithKline UK Ltd)  
40 Flixotide Inhaler 125 micrograms/puff  
41 Flixotide Inhaler 250 micrograms/puff  
42 Flixotide Inhaler 50 micrograms/puff  
43 Fluticasone 125micrograms/dose inhaler CFC free  
44 Fluticasone 250micrograms/dose inhaler CFC free  
45 Fluticasone 25micrograms/dose inhaler  
46 Fluticasone 2mg/2ml nebuliser liquid unit dose vials  
47 Fluticasone 500micrograms/2ml nebuliser liquid unit dose vials  
48 Fluticasone 50micrograms/dose inhaler CFC free  
49 Fluticasone propionate 100microgram inhalation powder blisters  
50 Fluticasone propionate 100microgram inhalation powder blisters with device

1 Fluticasone propionate 100micrograms/dose dry powder inhaler  
2 Fluticasone propionate 250microgram inhalation powder blisters  
3 Fluticasone propionate 250microgram inhalation powder blisters with device  
4 Fluticasone propionate 250micrograms/dose dry powder inhaler  
5 Fluticasone propionate 500microgram inhalation powder blisters  
6 Fluticasone propionate 500microgram inhalation powder blisters with device  
7 Fluticasone propionate 500micrograms/dose dry powder inhaler  
8 Fluticasone propionate 50microgram inhalation powder blisters  
9 Fluticasone propionate 50microgram inhalation powder blisters with device  
10 Fluticasone propionate 50micrograms/dose dry powder inhaler  
11 Fluticasone Propionate Accuhaler 100 micrograms/dose  
12 Fluticasone Propionate Accuhaler 250 micrograms/dose  
13 Fluticasone Propionate Accuhaler 50 micrograms/dose  
14 Fluticasone Propionate Accuhaler 500 micrograms/dose  
15 Fluticasone Propionate Disks with diskhaler 100 micrograms/dose  
16 Fluticasone Propionate Disks with diskhaler 250 micrograms/dose  
17 Fluticasone Propionate Disks with diskhaler 50 micrograms/dose  
18 Fluticasone Propionate Disks with diskhaler 500 micrograms/puff  
19 Fluticasone Propionate Inhaler 125 micrograms/puff  
20 Fluticasone Propionate Inhaler 250 micrograms/puff  
21 Fluticasone Propionate Inhaler 50 micrograms/puff  
22 Kelhale 100micrograms/dose inhaler (Cipla EU Ltd)  
23 Kelhale 50micrograms/dose inhaler (Cipla EU Ltd)  
24 Mometasone 200micrograms/dose dry powder inhaler  
25 Mometasone 400micrograms/dose dry powder inhaler  
26 Mometasone Furoate Dry Powder Inhaler 200 micrograms/dose, 30 doses  
27 Mometasone Furoate Dry Powder Inhaler 200 micrograms/dose, 60 doses  
28 Mometasone Furoate Dry Powder Inhaler 400 micrograms/dose, 30 doses  
29 Mometasone Furoate Dry Powder Inhaler 400 micrograms/dose, 60 doses  
30 Novolizer Budesonide Inhalation Cartridge + Device 200 micrograms/dose, 100 doses  
31 Novolizer Budesonide Inhalation Cartridge Refill 200 micrograms/dose, 100 doses  
32 Pulmicort 0.5mg Respules (AstraZeneca UK Ltd)  
33 Pulmicort 100 Turbohaler (AstraZeneca UK Ltd)  
34 Pulmicort 100micrograms/dose inhaler CFC free (AstraZeneca UK Ltd)  
35 Pulmicort 1mg Respules (AstraZeneca UK Ltd)  
36 Pulmicort 200 Turbohaler (AstraZeneca UK Ltd)  
37 Pulmicort 200micrograms/dose inhaler (AstraZeneca UK Ltd)  
38 Pulmicort 200micrograms/dose inhaler CFC free (AstraZeneca UK Ltd)  
39 Pulmicort 200micrograms/dose inhaler with Nebuchamber (AstraZeneca UK Ltd)  
40 Pulmicort 400 Turbohaler (AstraZeneca UK Ltd)  
41 Pulmicort LS 50micrograms/dose inhaler (AstraZeneca UK Ltd)  
42 Pulmicort Ls Refill canister 50 micrograms/dose  
43 Pulmicort Refill canister 200 micrograms/dose  
44 Pulmicort Spacer inhaler 200 micrograms/dose  
45 Pulmicort Spacer inhaler 50 micrograms/dose  
46 Pulmicort Turbohaler Breath-Actuated Dry Powder Inhaler 100 micrograms/dose  
47 Pulmicort Turbohaler Breath-Actuated Dry Powder Inhaler 200 micrograms/dose  
48 Pulmicort Turbohaler Breath-Actuated Dry Powder Inhaler 400 micrograms/dose  
49 Pulvinal Beclometasone Dipropionate 100micrograms/dose dry powder inhaler (Chiesi Ltd)  
50 Pulvinal Beclometasone Dipropionate 200micrograms/dose dry powder inhaler (Chiesi Ltd)



1 Pulvinal Beclometasone Dipropionate 400micrograms/dose dry powder inhaler (Chiesi Ltd)  
2 Qvar 100 Autohaler (Teva UK Ltd)  
3 Qvar 100 inhaler (Teva UK Ltd)  
4 Qvar 100micrograms/dose Easi-Breathe inhaler (Teva UK Ltd)  
5 Qvar 50 Autohaler (Teva UK Ltd)  
6 Qvar 50 inhaler (Teva UK Ltd)  
7 Qvar 50micrograms/dose Easi-Breathe inhaler (Teva UK Ltd)  
8 Soprobec 100micrograms/dose inhaler (Glenmark Pharmaceuticals Europe Ltd)  
9 Soprobec 200micrograms/dose inhaler (Glenmark Pharmaceuticals Europe Ltd)  
10 Soprobec 250micrograms/dose inhaler (Glenmark Pharmaceuticals Europe Ltd)  
11 Soprobec 50micrograms/dose inhaler (Glenmark Pharmaceuticals Europe Ltd)  
12 Fluticasone 500micrograms/2ml nebuliser liquid unit dose vials (Imported)  
13 Fluticasone 2mg/2ml nebuliser liquid unit dose vials (Imported)  
14 Ventide inhaler (GlaxoSmithKline UK Ltd)  
15 Ventide Paediatric Rotacaps (GlaxoSmithKline UK Ltd)  
16 Ventide Rotacaps (GlaxoSmithKline UK Ltd)  
17 Atimos Modulite 12micrograms/dose inhaler (Chiesi Ltd)  
18 Eformoterol Fumarate Breath-actuated inhaler 12 micrograms/dose  
19 Eformoterol Fumarate Breath-actuated inhaler 6 micrograms/dose  
20 Eformoterol Fumarate Dry powder for inhalation with inhaler device 12 micrograms  
21 Foradil 12microgram inhalation powder capsules with device (Novartis Pharmaceuticals UK Ltd)  
22 Formoterol 12microgram inhalation powder capsules with device  
23 Formoterol 12micrograms/dose dry powder inhaler  
24 Formoterol 12micrograms/dose inhaler CFC free  
25 Formoterol 6micrograms/dose dry powder inhaler  
26 Formoterol Dry Powder Inhaler 12 micrograms/actuation, 120 dose  
27 Formoterol Dry Powder Inhaler 12 micrograms/actuation, 60 dose  
28 Formoterol Easyhaler 12micrograms/dose dry powder inhaler (Orion Pharma (UK) Ltd)  
29 Indacaterol 150microgram inhalation powder capsules with device  
30 Indacaterol 300microgram inhalation powder capsules with device  
31 Neovent 25micrograms/dose inhaler CFC free (Kent Pharmaceuticals Ltd)  
32 Olodaterol 2.5micrograms/dose solution for inhalation cartridge with device CFC free  
33 Onbrez Breezhaler 150microgram inhalation powder capsules with device (Novartis Pharmaceuticals UK Ltd)  
34 Onbrez Breezhaler 300microgram inhalation powder capsules with device (Novartis Pharmaceuticals UK Ltd)  
35 Oxis 12 Turbohaler (AstraZeneca UK Ltd)  
36 Oxis 6 Turbohaler (AstraZeneca UK Ltd)  
37 Oxis Turbohaler 4.5 micrograms/dose  
38 Oxis Turbohaler 9 micrograms/dose  
39 Salmeterol 25micrograms/dose inhaler  
40 Salmeterol 25micrograms/dose inhaler CFC free  
41 Salmeterol 50microgram inhalation powder blisters  
42 Salmeterol 50microgram inhalation powder blisters with device  
43 Salmeterol 50micrograms/dose dry powder inhaler  
44 Salmeterol Xinafoate Accuhaler 50 micrograms/dose  
45 Salmeterol Xinafoate Disks with diskhaler 50 micrograms/blister  
46 Serevent 25micrograms/dose Evohaler (GlaxoSmithKline UK Ltd)  
47 Serevent 25micrograms/dose inhaler (GlaxoSmithKline UK Ltd)  
48 Serevent 50microgram disks (GlaxoSmithKline UK Ltd)  
49 Serevent 50microgram disks with Diskhaler (GlaxoSmithKline UK Ltd)  
50 Serevent 50micrograms/dose Accuhaler (GlaxoSmithKline UK Ltd)

1 Soltel 25micrograms/dose inhaler CFC free (Kent Pharmaceuticals Ltd)  
2  
3 Striverdi Respimat 2.5micrograms/dose solution for inhalation cartridge with device (Boehringer Ingelheim Ltc  
4 Vertine 25micrograms/dose inhaler CFC free (Teva UK Ltd)  
5 Striverdi Respimat 2.5micrograms/dose inhalation solution refill cartridge (Boehringer Ingelheim Ltd)  
6 Olodaterol 2.5micrograms/dose inhalation solution cartridge CFC free  
7  
8 Atimos Modulite 12micrograms/dose inhaler (Chiesi Ltd)  
9 Eformoterol Fumarate Breath-actuated inhaler 12 micrograms/dose  
10 Eformoterol Fumarate Breath-actuated inhaler 6 micrograms/dose  
11 Eformoterol Fumarate Dry powder for inhalation with inhaler device 12 micrograms  
12 Foradil 12microgram inhalation powder capsules with device (Novartis Pharmaceuticals UK Ltd)  
13 Formoterol 12microgram inhalation powder capsules with device  
14 Formoterol 12micrograms/dose dry powder inhaler  
15 Formoterol 12micrograms/dose inhaler CFC free  
16 Formoterol 6micrograms/dose dry powder inhaler  
17 Formoterol Dry Powder Inhaler 12 micrograms/actuation, 120 dose  
18 Formoterol Dry Powder Inhaler 12 micrograms/actuation, 60 dose  
19 Formoterol Easyhaler 12micrograms/dose dry powder inhaler (Orion Pharma (UK) Ltd)  
20 Indacaterol 150microgram inhalation powder capsules with device  
21 Indacaterol 300microgram inhalation powder capsules with device  
22 Neovent 25micrograms/dose inhaler CFC free (Kent Pharmaceuticals Ltd)  
23 Olodaterol 2.5micrograms/dose solution for inhalation cartridge with device CFC free  
24 Onbrez Breezhaler 150microgram inhalation powder capsules with device (Novartis Pharmaceuticals UK Ltd)  
25 Onbrez Breezhaler 300microgram inhalation powder capsules with device (Novartis Pharmaceuticals UK Ltd)  
26 Oxis 12 Turbohaler (AstraZeneca UK Ltd)  
27 Oxis 6 Turbohaler (AstraZeneca UK Ltd)  
28 Oxis Turbuhaler 4.5 micrograms/dose  
29 Oxis Turbuhaler 9 micrograms/dose  
30 Salmeterol 25micrograms/dose inhaler  
31 Salmeterol 25micrograms/dose inhaler CFC free  
32 Salmeterol 50microgram inhalation powder blisters  
33 Salmeterol 50microgram inhalation powder blisters with device  
34 Salmeterol 50micrograms/dose dry powder inhaler  
35 Salmeterol Xinafoate Accuhaler 50 micrograms/dose  
36 Salmeterol Xinafoate Disks with diskhaler 50 micrograms/blister  
37 Serevent 25micrograms/dose Evohaler (GlaxoSmithKline UK Ltd)  
38 Serevent 25micrograms/dose inhaler (GlaxoSmithKline UK Ltd)  
39 Serevent 50microgram disks (GlaxoSmithKline UK Ltd)  
40 Serevent 50microgram disks with Diskhaler (GlaxoSmithKline UK Ltd)  
41 Serevent 50micrograms/dose Accuhaler (GlaxoSmithKline UK Ltd)  
42 Soltel 25micrograms/dose inhaler CFC free (Kent Pharmaceuticals Ltd)  
43 Striverdi Respimat 2.5micrograms/dose solution for inhalation cartridge with device (Boehringer Ingelheim Ltc  
44 Vertine 25micrograms/dose inhaler CFC free (Teva UK Ltd)  
45 Striverdi Respimat 2.5micrograms/dose inhalation solution refill cartridge (Boehringer Ingelheim Ltd)  
46 Olodaterol 2.5micrograms/dose inhalation solution cartridge CFC free  
47 Aerivio Spiromax 50micrograms/dose / 500micrograms/dose dry powder inhaler (Teva UK Ltd)  
48 AirFluSal 25micrograms/dose / 125micrograms/dose inhaler (Sandoz Ltd)  
49 AirFluSal 25micrograms/dose / 250micrograms/dose inhaler (Sandoz Ltd)  
50 AirFluSal Forspiro 50micrograms/dose / 500micrograms/dose dry powder inhaler (Sandoz Ltd)  
51 Aloflute 25micrograms/dose / 125micrograms/dose inhaler (Mylan)  
52 Aloflute 25micrograms/dose / 250micrograms/dose inhaler (Mylan)

1 Beclometasone 100micrograms/dose / Formoterol 6micrograms/dose dry powder inhaler  
2 Beclometasone 100micrograms/dose / Formoterol 6micrograms/dose inhaler CFC free  
3 Beclometasone 200micrograms/dose / Formoterol 6micrograms/dose dry powder inhaler  
4 Beclometasone 200micrograms/dose / Formoterol 6micrograms/dose inhaler CFC free  
5 Budesonide 100micrograms/dose / Formoterol 6micrograms/dose dry powder inhaler  
6 Budesonide 200micrograms/dose / Formoterol 6micrograms/dose dry powder inhaler  
7 Budesonide 200micrograms/dose / Formoterol 6micrograms/dose inhaler CFC free  
8 Budesonide 400micrograms/dose / Formoterol 12micrograms/dose dry powder inhaler  
9 Combisal 25micrograms/dose / 125micrograms/dose inhaler (Aspire Pharma Ltd)  
10 Combisal 25micrograms/dose / 250micrograms/dose inhaler (Aspire Pharma Ltd)  
11 Combisal 25micrograms/dose / 50micrograms/dose inhaler (Aspire Pharma Ltd)  
12 DuoResp Spiromax 160micrograms/dose / 4.5micrograms/dose dry powder inhaler (Teva UK Ltd)  
13 DuoResp Spiromax 320micrograms/dose / 9micrograms/dose dry powder inhaler (Teva UK Ltd)  
14 Fluticasone 125micrograms/dose / Formoterol 5micrograms/dose breath actuated inhaler CFC free  
15 Fluticasone 125micrograms/dose / Formoterol 5micrograms/dose inhaler CFC free  
16 Fluticasone 125micrograms/dose / Salmeterol 25micrograms/dose inhaler CFC free  
17 Fluticasone 250micrograms/dose / Formoterol 10micrograms/dose inhaler CFC free  
18 Fluticasone 250micrograms/dose / Salmeterol 25micrograms/dose inhaler CFC free  
19 Fluticasone 50micrograms/dose / Formoterol 5micrograms/dose breath actuated inhaler CFC free  
20 Fluticasone 50micrograms/dose / Formoterol 5micrograms/dose inhaler CFC free  
21 Fluticasone 50micrograms/dose / Salmeterol 25micrograms/dose inhaler CFC free  
22 Fluticasone furoate 184micrograms/dose / Vilanterol 22micrograms/dose dry powder inhaler  
23 Fluticasone furoate 92micrograms/dose / Vilanterol 22micrograms/dose dry powder inhaler  
24 Fluticasone propionate 100micrograms/dose / Salmeterol 50micrograms/dose dry powder inhaler  
25 Fluticasone propionate 250micrograms/dose / Salmeterol 50micrograms/dose dry powder inhaler  
26 Fluticasone propionate 500micrograms/dose / Salmeterol 50micrograms/dose dry powder inhaler  
27 Flutiform 125micrograms/dose / 5micrograms/dose inhaler (Napp Pharmaceuticals Ltd)  
28 Flutiform 250micrograms/dose / 10micrograms/dose inhaler (Napp Pharmaceuticals Ltd)  
29 Flutiform 50micrograms/dose / 5micrograms/dose inhaler (Napp Pharmaceuticals Ltd)  
30 Flutiform K-haler 125micrograms/dose / 5micrograms/dose breath actuated inhaler (Napp Pharmaceuticals Ltd)  
31 Flutiform K-haler 50micrograms/dose / 5micrograms/dose breath actuated inhaler (Napp Pharmaceuticals Ltd)  
32 Fobumix Easyhaler 160micrograms/dose / 4.5micrograms/dose dry powder inhaler (Orion Pharma (UK) Ltd)  
33 Fobumix Easyhaler 320micrograms/dose / 9micrograms/dose dry powder inhaler (Orion Pharma (UK) Ltd)  
34 Fobumix Easyhaler 80micrograms/dose / 4.5micrograms/dose dry powder inhaler (Orion Pharma (UK) Ltd)  
35 Fostair 100micrograms/dose / 6micrograms/dose inhaler (Chiesi Ltd)  
36 Fostair 200micrograms/dose / 6micrograms/dose inhaler (Chiesi Ltd)  
37 Fostair NEXThaler 100micrograms/dose / 6micrograms/dose dry powder inhaler (Chiesi Ltd)  
38 Fostair NEXThaler 200micrograms/dose / 6micrograms/dose dry powder inhaler (Chiesi Ltd)  
39 Fusacomb Easyhaler 50micrograms/dose / 250micrograms/dose dry powder inhaler (Orion Pharma (UK) Ltd)  
40 Fusacomb Easyhaler 50micrograms/dose / 500micrograms/dose dry powder inhaler (Orion Pharma (UK) Ltd)  
41 Relvar Ellipta 184micrograms/dose / 22micrograms/dose dry powder inhaler (GlaxoSmithKline UK Ltd)  
42 Relvar Ellipta 92micrograms/dose / 22micrograms/dose dry powder inhaler (GlaxoSmithKline UK Ltd)  
43 Sereflo 25micrograms/dose / 125micrograms/dose inhaler (Cipla EU Ltd)  
44 Sereflo 25micrograms/dose / 250micrograms/dose inhaler (Cipla EU Ltd)  
45 Seretide 100 Accuhaler (GlaxoSmithKline UK Ltd)  
46 Seretide 125 Evohaler (GlaxoSmithKline UK Ltd)  
47 Seretide 250 Accuhaler (GlaxoSmithKline UK Ltd)  
48 Seretide 250 Evohaler (GlaxoSmithKline UK Ltd)  
49 Seretide 50 Evohaler (GlaxoSmithKline UK Ltd)  
50 Seretide 500 Accuhaler (GlaxoSmithKline UK Ltd)

1 Sirdupla 25micrograms/dose / 125micrograms/dose inhaler (Mylan)  
2 Sirdupla 25micrograms/dose / 250micrograms/dose inhaler (Mylan)  
3 Stalplex 50micrograms/dose / 500micrograms/dose dry powder inhaler (Glenmark Pharmaceuticals Europe Ltc)  
4 Symbicort 100/6 Turbohaler (AstraZeneca UK Ltd)  
5 Symbicort 200/6 Turbohaler (AstraZeneca UK Ltd)  
6 Symbicort 200micrograms/dose / 6micrograms/dose pressurised inhaler (AstraZeneca UK Ltd)  
7 Symbicort 400/12 Turbohaler (AstraZeneca UK Ltd)  
8 Symbicort Turbuhaler 160/4.5 micrograms/dose  
9 Symbicort Turbuhaler 320/9 micrograms/dose  
10 Symbicort Turbuhaler 80/4.5 micrograms/dose  
11 Symbicort 100micrograms/dose / 3micrograms/dose pressurised inhaler (AstraZeneca UK Ltd)  
12 Budesonide 100micrograms/dose / Formoterol 3micrograms/dose inhaler CFC free  
13 Umeclidinium bromide 65micrograms/dose / Vilanterol 22micrograms/dose dry powder inhaler  
14 Anoro Ellipta 55micrograms/dose / 22micrograms/dose dry powder inhaler (GlaxoSmithKline UK Ltd)  
15 Trimbaw 87micrograms/dose / 5micrograms/dose / 9micrograms/dose inhaler (Chiesi Ltd)  
16 Trelegy Ellipta 92micrograms/dose / 55micrograms/dose / 22micrograms/dose dry powder inhaler (GlaxoSmit  
17 Aminophylline 100mg tablets  
18 Aminophylline 225mg modified-release tablets  
19 Aminophylline hydrate 225mg modified-release tablets  
20 Aminophylline hydrate 350mg modified-release tablets  
21 Aminophylline Paediatric tablets 100 mg  
22 Aminophylline Tablets 225 mg  
23 Amnivent 350 Sr tablets 350 mg  
24 Amnivent-225 SR tablets (Ashbourne Pharmaceuticals Ltd)  
25 Biophylline Capsules 350 mg  
26 Biophylline Capsules 500 mg  
27 Biophylline Syrup 125 mg/5 ml  
28 Choline Theophyllinate Syrup 62.5 mg/5 ml  
29 Choline Theophyllinate Tablets 100 mg  
30 Choline Theophyllinate Tablets 200 mg  
31 Choline Theophyllinate Tablets 424 mg  
32 Franol Plus tablets (Sanofi)  
33 Franol tablets (Sanofi)  
34 Lasma Tablets 300 mg  
35 Norphyllin SR 225mg tablets (Teva UK Ltd)  
36 Nuelin 125mg tablets (3M Health Care Ltd)  
37 Nuelin 60mg/5ml liquid (3M Health Care Ltd)  
38 Nuelin SA 175mg tablets (Meda Pharmaceuticals Ltd)  
39 Nuelin SA 250 tablets (Meda Pharmaceuticals Ltd)  
40 Pecram M/R tablets 225 mg  
41 Phyllocontin Continus 225mg tablets (Napp Pharmaceuticals Ltd)  
42 Phyllocontin Forte Continus 350mg tablets (Napp Pharmaceuticals Ltd)  
43 Phyllocontin Paediatric Continus 100mg tablets (Napp Pharmaceuticals Ltd)  
44 Pro-Vent Capsules 300 mg  
45 Sabidal Sr 270 Tablets 424 mg  
46 Slo-Phyllin 125mg capsules (Merck Serono Ltd)  
47 Slo-Phyllin 250mg capsules (Merck Serono Ltd)  
48 Slo-Phyllin 60mg capsules (Merck Serono Ltd)  
49 Tedral Elixir  
50 Tedral Tablets

1  
2 Theodrox Tablets  
3 Theo-Dur 200mg tablets (AstraZeneca UK Ltd)  
4 Theo-Dur 300mg tablets (AstraZeneca UK Ltd)  
5 Theograd Tablets 350 mg  
6 Theophylline 125mg modified-release capsules  
7 Theophylline 125mg tablets  
8 Theophylline 175mg modified-release tablets  
9 Theophylline 200mg modified-release tablets  
10 Theophylline 250mg modified-release capsules  
11 Theophylline 250mg modified-release tablets  
12 Theophylline 300mg modified-release tablets  
13 Theophylline 400mg modified-release tablets  
14 Theophylline 50mg/5ml oral solution  
15 Theophylline 50mg/5ml oral suspension  
16 Theophylline 60mg modified-release capsules  
17 Theophylline 60mg/5ml oral solution  
18 Roflumilast 250microgram tablets  
19 Daxas 250microgram tablets (AstraZeneca UK Ltd)  
20 Roflumilast 500microgram tablets  
21 Daxas 500microgram tablets (AstraZeneca UK Ltd)  
22  
23  
24  
25  
26  
27  
28  
29  
30  
31  
32  
33  
34  
35  
36  
37  
38  
39  
40  
41  
42  
43  
44  
45  
46  
47  
48  
49  
50  
51  
52  
53  
54  
55  
56  
57  
58  
59  
60

1  
2  
3  
4  
5  
6  
7  
8  
9  
10  
11  
12  
13  
14  
15  
16  
17  
18  
19  
20  
21  
22  
23  
24  
25  
26  
27  
28  
29  
30  
31  
32  
33  
34  
35  
36  
37  
38  
39  
40  
41  
42  
43  
44  
45  
46  
47  
48  
49  
50  
51  
52  
53  
54  
55  
56  
57  
58  
59  
60

For peer review only

1  
2  
3  
4  
5  
6  
7  
8  
9  
10  
11  
12  
13  
14  
15  
16  
17  
18  
19  
20  
21  
22  
23  
24  
25  
26  
27  
28  
29  
30  
31  
32  
33  
34  
35  
36  
37  
38  
39  
40  
41  
42  
43  
44  
45  
46  
47  
48  
49  
50  
51  
52  
53  
54  
55  
56  
57  
58  
59  
60

For peer review only

1  
2  
3  
4  
5  
6  
7  
8  
9  
10  
11  
12  
13  
14  
15  
16  
17  
18  
19  
20  
21  
22  
23  
24  
25  
26  
27  
28  
29  
30  
31  
32  
33  
34  
35  
36  
37  
38  
39  
40  
41  
42  
43  
44  
45  
46  
47  
48  
49  
50  
51  
52  
53  
54  
55  
56  
57  
58  
59  
60

For peer review only



1  
2  
3  
4  
5  
6  
7  
8  
9  
10  
11  
12  
13  
14  
15  
16  
17  
18  
19  
20  
21  
22  
23  
24  
25  
26  
27  
28  
29  
30  
31  
32  
33  
34  
35  
36  
37  
38  
39  
40  
41  
42  
43  
44  
45  
46  
47  
48  
49  
50  
51  
52  
53  
54  
55  
56  
57  
58  
59  
60

For peer review only

1  
2  
3  
4  
5  
6  
7  
8  
9  
10  
11  
12  
13  
14  
15  
16  
17  
18  
19  
20  
21  
22  
23  
24  
25  
26  
27  
28  
29  
30  
31  
32  
33  
34  
35  
36  
37  
38  
39  
40  
41  
42  
43  
44  
45  
46  
47  
48  
49  
50  
51  
52  
53  
54  
55  
56  
57  
58  
59  
60

For peer review only

1  
2  
3  
4  
5  
6  
7  
8  
9  
10  
11  
12  
13  
14  
15  
16  
17  
18  
19  
20  
21  
22  
23  
24  
25  
26  
27  
28  
29  
30  
31  
32  
33  
34  
35  
36  
37  
38  
39  
40  
41  
42  
43  
44  
45  
46  
47  
48  
49  
50  
51  
52  
53  
54  
55  
56  
57  
58  
59  
60

For peer review only

1  
2  
3  
4  
5  
6  
7  
8  
9  
10  
11  
12  
13  
14  
15  
16  
17  
18  
19  
20  
21  
22  
23  
24  
25  
26  
27  
28  
29  
30  
31  
32  
33  
34  
35  
36  
37  
38  
39  
40  
41  
42  
43  
44  
45  
46  
47  
48  
49  
50  
51  
52  
53  
54  
55  
56  
57  
58  
59  
60

For peer review only

1  
2  
3  
4  
5  
6  
7  
8  
9  
10  
11  
12  
13  
14  
15  
16  
17  
18  
19  
20  
21  
22  
23  
24  
25  
26  
27  
28  
29  
30  
31  
32  
33  
34  
35  
36  
37  
38  
39  
40  
41  
42  
43  
44  
45  
46  
47  
48  
49  
50  
51  
52  
53  
54  
55  
56  
57  
58  
59  
60

For peer review only

1  
2  
3  
4  
5  
6  
7  
8  
9  
10  
11  
12  
13  
14  
15  
16  
17  
18  
19  
20  
21  
22  
23  
24  
25  
26  
27  
28  
29  
30  
31  
32  
33  
34  
35  
36  
37  
38  
39  
40  
41  
42  
43  
44  
45  
46  
47  
48  
49  
50  
51  
52  
53  
54  
55  
56  
57  
58  
59  
60

For peer review only

1  
2  
3  
4  
5  
6  
7  
8  
9  
10  
11  
12  
13  
14  
15  
16  
17  
18  
19  
20  
21  
22  
23  
24  
25  
26  
27  
28  
29  
30  
31  
32  
33  
34  
35  
36  
37  
38  
39  
40  
41  
42  
43  
44  
45  
46  
47  
48  
49  
50  
51  
52  
53  
54  
55  
56  
57  
58  
59  
60

For peer review only

1  
2  
3  
4  
5  
6  
7  
8  
9  
10  
11  
12  
13  
14  
15  
16  
17  
18  
19  
20  
21  
22  
23  
24  
25  
26  
27  
28  
29  
30  
31  
32  
33  
34  
35  
36  
37  
38  
39  
40  
41  
42  
43  
44  
45  
46  
47  
48  
49  
50  
51  
52  
53  
54  
55  
56  
57  
58  
59  
60

For peer review only



1  
2  
3  
4  
5  
6  
7  
8  
9  
10  
11  
12  
13  
14  
15  
16  
17  
18  
19  
20  
21  
22  
23  
24  
25  
26  
27  
28  
29  
30  
31  
32  
33  
34  
35  
36  
37  
38  
39  
40  
41  
42  
43  
44  
45  
46  
47  
48  
49  
50  
51  
52  
53  
54  
55  
56  
57  
58  
59  
60

For peer review only

1  
2  
3  
4  
5  
6  
7  
8  
9  
10  
11  
12  
13  
14  
15  
16  
17  
18  
19  
20  
21  
22  
23  
24  
25  
26  
27  
28  
29  
30  
31  
32  
33  
34  
35  
36  
37  
38  
39  
40  
41  
42  
43  
44  
45  
46  
47  
48  
49  
50  
51  
52  
53  
54  
55  
56  
57  
58  
59  
60

For peer review only

1  
2  
3  
4  
5  
6  
7  
8  
9  
10  
11  
12  
13  
14  
15  
16  
17  
18  
19  
20  
21  
22  
23  
24  
25  
26  
27  
28  
29  
30  
31  
32  
33  
34  
35  
36  
37  
38  
39  
40  
41  
42  
43  
44  
45  
46  
47  
48  
49  
50  
51  
52  
53  
54  
55  
56  
57  
58  
59  
60

td)

For peer review only

|    |           |
|----|-----------|
| 1  |           |
| 2  | Medcodeid |
| 3  | 2660019   |
| 4  | 4230015   |
| 5  | 5263018   |
| 6  | 6055016   |
| 7  | 22740018  |
| 8  | 24379014  |
| 9  | 28728012  |
| 10 | 41282012  |
| 11 | 43353015  |
| 12 | 60377018  |
| 13 | 63716015  |
| 14 | 69629017  |
| 15 | 80421013  |
| 16 | 84241012  |
| 17 | 101523017 |
| 18 | 108561012 |
| 19 | 108827017 |
| 20 | 111949011 |
| 21 | 116959011 |
| 22 | 124373014 |
| 23 | 151487012 |
| 24 | 199806019 |
| 25 | 251699010 |
| 26 | 254061017 |
| 27 | 255335015 |
| 28 | 271430018 |
| 29 | 271446014 |
| 30 | 271447017 |
| 31 | 271456013 |
| 32 | 271470013 |
| 33 | 271511016 |
| 34 | 271542014 |
| 35 | 271556011 |
| 36 | 271557019 |
| 37 | 271558012 |
| 38 | 271559016 |
| 39 | 271560014 |
| 40 | 271561013 |
| 41 | 271562018 |
| 42 | 271640014 |
| 43 | 271641013 |
| 44 | 271642018 |
| 45 | 271643011 |
| 46 | 271699014 |
| 47 | 271775016 |
| 48 | 271777012 |
| 49 | 271779010 |
| 50 | 271842015 |
| 51 | 271843013 |
| 52 |           |
| 53 |           |
| 54 |           |
| 55 |           |
| 56 |           |
| 57 |           |
| 58 |           |
| 59 |           |
| 60 |           |

For peer review only

1  
2 271891014  
3 272036015  
4 272037012  
5 272102012  
6 287283010  
7 297770011  
8 299790012  
9 299860014  
10 299862018  
11 300242011  
12 300389010  
13 300437018  
14 300438011  
15 300441019  
16 300442014  
17 300445011  
18 300446012  
19 300447015  
20 300448013  
21 300449017  
22 300450017  
23 300451018  
24 300453015  
25 300454014  
26 300457019  
27 300458012  
28 300460014  
29 300463011  
30 300464017  
31 300466015  
32 300468019  
33 300469010  
34 300472015  
35 300477014  
36 300479012  
37 300480010  
38 300482019  
39 300483012  
40 300484018  
41 300485017  
42 300960019  
43 300961015  
44 300962010  
45 300968014  
46 313396018  
47 313424014  
48 313574013  
49 313579015  
50 349674016  
51 349675015

For peer review only

1  
2 349676019  
3 349678018  
4 349689013  
5 349693019  
6 349694013  
7 349717014  
8 350577018  
9 354498012  
10 354499016  
11 369052016  
12 394307019  
13 394322012  
14 394337011  
15 395755010  
16 400814019  
17 410960011  
18 410969012  
19 410970013  
20 410972017  
21 410973010  
22 411503014  
23 437650013  
24 455424010  
25 458502011  
26 458503018  
27 458504012  
28 470121011  
29 480891014  
30 484314018  
31 506344012  
32 1221083011  
33 1229954013  
34 1232666014  
35 1235573016  
36 1476248016  
37 1488824018  
38 2536174018  
39 2674096019  
40 2675433011  
41 2675434017  
42 3509863013  
43 3527043019  
44 17311000006112  
45 17351000006113  
46 17361000006110  
47 17401000006117  
48 45851000006116  
49 45861000006119  
50 46601000006110  
51 173441000006111

For peer review only

1  
2 173451000006113  
3 173461000006110  
4 173471000006115  
5 173481000006117  
6 173491000006119  
7  
8 173501000006110  
9 173511000006113  
10 173521000006117  
11 173531000006119  
12 173541000006112  
13  
14 173551000006114  
15 173561000006111  
16 173571000006116  
17 173581000006118  
18 173591000006115  
19  
20 173601000006111  
21 173611000006114  
22 173621000006118  
23 173631000006115  
24 173641000006113  
25 173651000006110  
26 173661000006112  
27 173671000006117  
28 173691000006116  
29  
30 173711000006118  
31 193381000006117  
32 235491000006115  
33 356341000000113  
34 357881000000111  
35 359091000000110  
36 359231000000117  
37 359851000000113  
38 360051000000118  
39 377701000000114  
40 377721000000117  
41 377741000000112  
42 377901000000111  
43 384321000000116  
44 384381000000115  
45 384421000000112  
46 482451000006111  
47 482711000006116  
48 488221000000111  
49 488231000000113  
50 488301000006118  
51 542501000006110  
52 542511000006113  
53 557541000006111  
54 639641000006113  
55 639651000006110  
56  
57  
58  
59  
60

For peer review only

1  
2 639681000006119  
3 639701000006116  
4 639711000006118  
5 639721000006114  
6 639731000006112  
7  
8 639751000006117  
9 639761000006115  
10 639771000006110  
11 639781000006113  
12 639791000006111  
13 639801000006112  
14 639811000006110  
15 639821000006119  
16 639831000006116  
17 639841000006114  
18 639851000006111  
19 639861000006113  
20 639871000006118  
21 639881000006115  
22 639891000006117  
23 639901000006118  
24 639911000006115  
25 639921000006111  
26 640131000006119  
27 640141000006112  
28 640151000006114  
29 640181000006118  
30 640221000006110  
31 745471000000118  
32 750511000000117  
33 865061000006117  
34 865091000006113  
35 865741000006118  
36 865761000006119  
37 865981000006114  
38 866171000006118  
39 884551000006112  
40 884591000006118  
41 884601000006114  
42 905511000006118  
43 933331000006114  
44 988061000006116  
45 1547161000006110  
46 1548161000006110  
47 1548221000006110  
48 1548531000006110  
49 1548541000006110  
50 1548551000006110  
51 1548561000006110  
52 1548601000006110

For peer review only



1  
2 1548611000006110  
3 1548621000006110  
4 1548631000006110  
5 1548641000006110  
6 1548661000006110  
7 1548671000006110  
8 1548681000006110  
9 1548691000006110  
10 1548701000006110  
11 1548721000006110  
12 1548731000006110  
13 1587731000006110  
14 1587741000006110  
15 1587751000006110  
16 1587761000006110  
17 1587791000006110  
18 1587801000006110  
19 1587811000006110  
20 1701691000006110  
21 1701701000006110  
22 1701731000006110  
23 1728191000006110  
24 1756091000006110  
25 1775111000006110  
26 1795071000000110  
27 1920821000006110  
28 1948021000006110  
29 1967531000006110  
30 1967541000006110  
31 2209021000000110  
32 2209101000000110  
33 2528641000006110  
34 2528651000006110  
35 2672991000006110  
36 2724301000006110  
37 2805751000006110  
38 2833771000006110  
39 2833781000006110  
40 2893081000006110  
41 2906401000006110  
42 2914151000006110  
43 3047311000006110  
44 3048141000006110  
45 3193191000006110  
46 3193201000006110  
47 3205001000006110  
48 3267111000006110  
49 3280921000006110  
50 3318871000006110  
51 3337221000006110  
52  
53  
54  
55  
56  
57  
58  
59  
60

For peer review only

1 3378551000006110  
2 3378561000006110  
3 3454911000006110  
4 3595951000006110  
5 3603051000006110  
6 3645041000006110  
7 3717321000006110  
8 3720801000006110  
9 3733811000006110  
10 3882971000006110  
11 3888721000006110  
12 3892581000006110  
13 3892591000006110  
14 3916261000006110  
15 3971381000006110  
16 4056701000006110  
17 4193531000006110  
18 4214391000006110  
19 4374441000006110  
20 4374471000006110  
21 4411861000006110  
22 4411871000006110  
23 4666401000006110  
24 4666411000006110  
25 4778451000006110  
26 4778471000006110  
27 4778491000006110  
28 4778511000006110  
29 4778531000006110  
30 4778551000006110  
31 4778571000006110  
32 4778611000006110  
33 4778651000006110  
34 5011581000006110  
35 5013891000006110  
36 5013901000006110  
37 5013951000006110  
38 5049881000006110  
39 5049891000006110  
40 5058411000006110  
41 5058441000006110  
42 5058511000006110  
43 5058561000006110  
44 5059771000006110  
45 5359511000006110  
46 5476971000006110  
47 5559481000006110  
48 5582901000006110  
49 5582931000006110  
50 5582941000006110

For peer review only

1  
2 5582951000006110  
3 5583011000006110  
4 5583021000006110  
5 5583061000006110  
6 5583081000006110  
7 5583101000006110  
8 5583121000006110  
9 5595881000006110  
10 5595891000006110  
11 5595911000006110  
12 5597481000006110  
13 5597491000006110  
14 5597601000006110  
15 5597651000006110  
16 5659051000006110  
17 5836981000006110  
18 5837001000006110  
19 5837011000006110  
20 5893531000006110  
21 6057441000006110  
22 6213481000006110  
23 6376851000006110  
24 6714811000006110  
25 6714991000006110  
26 6830551000006110  
27 7049311000006110  
28 7052131000006110  
29 7066671000006110  
30 7090311000006110  
31 7097771000006110  
32 7107501000006110  
33 7173251000006110  
34 7217961000006110  
35 7224311000006110  
36 7260131000006110  
37 7294891000006110  
38 7351071000006110  
39 7515621000006110  
40 7974971000006110  
41 8271361000006110  
42 8284091000006110  
43 9478231000006110  
44 9836881000006110  
45 9836901000006110  
46 9836911000006110  
47 9836931000006110  
48 9836971000006110  
49 12705151000006100  
50 13502851000006100  
51 13630281000006100  
52  
53  
54  
55  
56  
57  
58  
59  
60

For peer review only

1  
2 13630291000006100  
3 13630311000006100  
4 13630331000006100  
5 13630341000006100  
6 13635861000006100  
7 13769841000006100  
8 14198581000006100  
9 7360411000006110  
10 206453010  
11 3513499011  
12 1767981000006110  
13 2531191000006110  
14 3793591000006110  
15 6843551000006110  
16 300603016  
17 473459011  
18 2545121000006110  
19 3009771000006110  
20 6203441000006110  
21 6203451000006110  
22 13632601000006100  
23 13632611000006100  
24 13632621000006100  
25 753651000006116  
26 2959311000006110  
27 5059971000006110  
28 5339081000006110  
29 7372971000006110  
30 9835451000006110  
31 47965014  
32 47966010  
33 75071013  
34 128722012  
35 300835018  
36 300837014  
37 300988013  
38 2160047013  
39 884961000006115  
40 2281911000000110  
41 3443351000006110  
42 5010701000006110  
43 7161931000006110  
44 7987561000006110  
45 8156931000006110  
46 93510018  
47 140745011  
48 379509010  
49 412415012  
50 481149018  
51 3511443018  
52  
53  
54  
55  
56  
57  
58  
59  
60

For peer review only

1  
2 2502591000006110  
3 2847941000006110  
4 2848021000006110  
5 2848031000006110  
6 2995311000006110  
7 3413641000006110  
8 3976541000006110  
9 4059171000006110  
10 4212421000006110  
11 4212431000006110  
12 4779251000006110  
13 5030781000006110  
14 5030791000006110  
15 5036761000006110  
16 5126041000006110  
17 5126061000006110  
18 5126081000006110  
19 5126171000006110  
20 5350181000006110  
21 6041471000006110  
22 7005251000006110  
23 7516461000006110  
24 7573291000006110  
25 11790741000006100  
26 12052411000006100  
27 53457013  
28 91895012  
29 293373010  
30 297777014  
31 309393014  
32 357845012  
33 1779323014  
34 3441922013  
35 65971000006112  
36 2687811000006110  
37 2932281000006110  
38 2932291000006110  
39 3247871000006110  
40 3258811000006110  
41 3483561000006110  
42 3483571000006110  
43 3483581000006110  
44 3483611000006110  
45 4762491000006110  
46 4770431000006110  
47 5126351000006110  
48 5141711000006110  
49 5141731000006110  
50 5141761000006110  
51 6668381000006110  
52  
53  
54  
55  
56  
57  
58  
59  
60

For peer review only

1  
2 7047591000006110  
3 7067811000006110  
4 7480781000006110  
5 7858331000006110  
6 7858361000006110  
7  
8 12369161000006100  
9 12369171000006100  
10 13680441000006100  
11 13682661000006100  
12 14071261000006100  
13 14073411000006100  
14  
15 105536013  
16 375462013  
17 411512011  
18 445146016  
19  
20 1715241000006110  
21 3532661000006110  
22 4056731000006110  
23 4056741000006110  
24 8279141000006110  
25  
26 251690014  
27 254104013  
28 272209014  
29 272214013  
30 272215014  
31 272216010  
32 272219015  
33 272221013  
34 272222018  
35 272223011  
36 272234014  
37 272235010  
38 272236011  
39 272237019  
40 284209016  
41 300721013  
42 300723011  
43 300724017  
44 300727012  
45 300728019  
46 300730017  
47 300795013  
48 300796014  
49 300982014  
50 350683012  
51 350684018  
52 355723016  
53 355724010  
54 355726012  
55 394358017  
56  
57  
58  
59  
60

For peer review only

1  
2 394359013  
3 394360015  
4 411635018  
5 451448014  
6 457115011  
7 489882019  
8 1221208011  
9  
10 65611000006114  
11 124301000006115  
12 299441000000114  
13 311501000000116  
14 357921000000117  
15 358141000000110  
16 360251000000111  
17 377221000000113  
18 377241000000118  
19 384681000000110  
20 384721000000115  
21 501531000006116  
22 571551000006119  
23 715361000006118  
24 743601000006118  
25 866371000006116  
26 866391000006115  
27 866401000006118  
28 866411000006115  
29 866421000006111  
30 884761000006118  
31 884771000006113  
32 884781000006111  
33 884791000006114  
34 884801000006110  
35 884811000006113  
36 884821000006117  
37 884921000006114  
38 888661000006119  
39 888671000006114  
40 905481000006114  
41 906691000006119  
42 939531000006118  
43 988071000006111  
44 989231000006113  
45 989241000006115  
46 991661000006118  
47 1548941000006110  
48 1548961000006110  
49 1549411000006110  
50 1587911000006110  
51 2507391000006110  
52 2507401000006110

For peer review only

1  
2 2524641000006110  
3 2524661000006110  
4 2704161000006110  
5 2747631000006110  
6 2747641000006110  
7  
8 3627911000006110  
9 3685041000006110  
10 3723031000006110  
11 4779571000006110  
12 4779581000006110  
13  
14 5051001000006110  
15 5051011000006110  
16 5059471000006110  
17 5358501000006110  
18 5492341000006110  
19 5492351000006110  
20 5492361000006110  
21 5575541000006110  
22 5723991000006110  
23 5730501000006110  
24 5924591000006110  
25 5929681000006110  
26 5935521000006110  
27 6029061000006110  
28 6029071000006110  
29 6029101000006110  
30 6596321000006110  
31 7106171000006110  
32 7361421000006110  
33 7373301000006110  
34 7373311000006110  
35 7373891000006110  
36 7373931000006110  
37 7380141000006110  
38 7609731000006110  
39 7700361000006110  
40 8426871000006110  
41 12705041000006100  
42 272195016  
43 272203010  
44 272204016  
45 300848019  
46 2829111000006110  
47 5059391000006110  
48 5059411000006110  
49 5059421000006110  
50 5059431000006110  
51 6668581000006110  
52 7235821000006110  
53 7573311000006110  
54  
55  
56  
57  
58  
59  
60

For peer review only



1  
2 345710016  
3 7806281000006110  
4 9843291000006110  
5 9843651000006110  
6 9843691000006110  
7  
8 1216343012  
9 1216721019  
10 2994811000006110  
11 3364751000006110  
12 5050271000006110  
13  
14 300366019  
15 449935012  
16 451371010  
17 1212072018  
18 1227591017  
19 2474330011  
20 2476091017  
21 2548554013  
22 3509817019  
23 3521990012  
24 138981000000113  
25 139081000000117  
26 139091000000115  
27 149571000006118  
28 162111000000112  
29 306621000000116  
30 371641000000112  
31 426321000006116  
32 524511000006116  
33 907581000006119  
34 907591000006116  
35 908801000006114  
36 928621000006111  
37 966981000006112  
38 968341000006116  
39 171663100000115  
40 1757281000006116  
41 1784651000006110  
42 1863321000006113  
43 1992451000006114  
44 1994761000006112  
45 2008521000006110  
46 2008601000006116  
47 2901571000006113  
48 3142511000006112  
49 4057041000006110  
50 4193641000006111  
51 5011071000006114  
52 5011081000006112  
53 5011111000006118

For peer review only

1 5011121000006114  
2 5011141000006119  
3 5011461000006111  
4 5011471000006116  
5 5011871000006119  
6 5960821000006117  
7 5960951000006117  
8 5960971000006110  
9 6348291000006115  
10 6348301000006119  
11 6349401000006115  
12 6837051000006119  
13 6846141000006118  
14 6990981000006114  
15 6990991000006112  
16 7071911000006114  
17 7703601000006113  
18 7855631000006111  
19 7861341000006115  
20 8014911000006110  
21 8026451000006117  
22 8044481000006118  
23 8196061000006110  
24 8264201000006110  
25 8265471000006116  
26 8453031000006117  
27 8453821000006113  
28 9912271000006112  
29 13718641000006112  
30 13909861000006114  
31 13909881000006116  
32 13909891000006118  
33 13909901000006119  
34 14182621000006113  
35 14194161000006118  
36 14194651000006114  
37 14194811000006114  
38 264499015  
39 411416011  
40 413750011  
41 3508956015  
42 3508962013  
43 3508965010  
44 3516948016  
45 122361000006113  
46 122401000006115  
47 884521000006115  
48 884531000006117  
49 940051000006114  
50 940061000006111

For peer review only

1  
2 940071000006116  
3 940081000006118  
4 1160471000000111  
5 1682791000006112  
6 1726581000006116  
7  
8 2115821000000118  
9 2118011000000114  
10 2126181000000114  
11 2127781000000110  
12 2539131000006116  
13 5010981000006119  
14 5011451000006114  
15 5866391000006119  
16 5866401000006117  
17 7568281000006111  
18 7597121000006117  
19 7618821000006118  
20 8195431000006118  
21 8274811000006116  
22 300312010  
23 300313017  
24 300321011  
25 300322016  
26 300411016  
27 300941014  
28 395780010  
29 451133011  
30 451134017  
31 267321000006114  
32 370701000006118  
33 542251000006112  
34 542261000006114  
35 543141000006110  
36 841051000006113  
37 1573101000006112  
38 1576261000006112  
39 1900601000006111  
40 1900651000006110  
41 2436731000000112  
42 2729551000000111  
43 2729571000000119  
44 5011041000006118  
45 5011051000006116  
46 5011061000006119  
47 5011091000006110  
48 5011101000006116  
49 5011131000006112  
50 5011291000006119  
51 5011331000006114  
52 5011351000006119

For peer review only

1  
2 5582311000006110  
3 7598981000006119  
4 7599001000006116  
5 7839991000006115  
6 8011371000006117  
7  
8 296995010  
9 405339016  
10 1227592012  
11 3508952018  
12 3508955016  
13 3508958019  
14 3508961018  
15 3508964014  
16 3509777019  
17 3509790014  
18 3509794017  
19 3509799010  
20 3509810017  
21 3636133016  
22 605461000006117  
23 605481000006110  
24 605491000006113  
25 809421000006116  
26 1773371000006117  
27 4778181000006119  
28 4778201000006118  
29 5649201000006113  
30 7519441000006112  
31 13717171000006112  
32 13718601000006110  
33 13718621000006117  
34 14014251000006116  
35 14194191000006114  
36 14194211000006110  
37 14194281000006115  
38 14194331000006112  
39 14194491000006118  
40 14194571000006115  
41 14194611000006113  
42 14194641000006112  
43 14194661000006111  
44 14194741000006118  
45 14194801000006111  
46 14194841000006113  
47 14194941000006115  
48 14194971000006111  
49 300370010  
50 300371014  
51 411518010  
52 1780304018  
53  
54  
55  
56  
57  
58  
59  
60

For peer review only

1  
2 605501000006117  
3 909171000006115  
4 87208017  
5 89332015  
6 92070010  
7  
8 99508014  
9 271162013  
10 271507010  
11 271508017  
12 271533019  
13 271534013  
14 271561013  
15 271562018  
16 271607017  
17 271608010  
18 271613014  
19 271688012  
20 271738014  
21 271740016  
22 271746010  
23 272013012  
24 272014018  
25 294652012  
26 294653019  
27 294654013  
28 294655014  
29 294656010  
30 300200014  
31 300433019  
32 300434013  
33 300435014  
34 300436010  
35 300503012  
36 300959012  
37 394328011  
38 394329015  
39 394346017  
40 410964019  
41 410965018  
42 410987010  
43 444906018  
44 444907010  
45 497559016  
46 1230211012  
47 2533125014  
48 2536393012  
49 2675439010  
50 213421000006113  
51 218531000000113  
52 363791000006112

For peer review only

1  
2 491581000006110  
3 496971000006110  
4 496981000006113  
5 496991000006111  
6 497011000006117  
7  
8 595731000006114  
9 641501000006112  
10 641511000006110  
11 641521000006119  
12 641541000006114  
13 641551000006111  
14 641561000006113  
15 641571000006118  
16 641681000006116  
17 641691000006118  
18 641691000006118  
19 641701000006118  
20 641711000006115  
21 641721000006111  
22 641731000006114  
23 641751000006119  
24 865311000006118  
25 866181000006115  
26 866211000006116  
27 866221000006112  
28 884411000006110  
29 884541000006110  
30 884571000006119  
31 884581000006116  
32 905551000006117  
33 932371000006118  
34 932471000006114  
35 938561000006115  
36 1548361000006119  
37 1746621000006118  
38 2609111000000119  
39 2762941000006113  
40 2829381000006119  
41 2965761000006111  
42 2974031000006111  
43 2974041000006118  
44 3123251000006118  
45 3123261000006116  
46 3145221000006111  
47 3230441000006110  
48 3283641000006112  
49 3283661000006111  
50 3455091000006118  
51 3521721000006113  
52 3561811000006118  
53 3588611000006113  
54  
55  
56  
57  
58  
59  
60

For peer review only

1 3600701000006114  
2 3830431000006112  
3 3964651000006112  
4 3964661000006114  
5 4005601000006116  
6 4315321000006116  
7 4427851000006112  
8 4427861000006114  
9 4427871000006119  
10 4721241000006111  
11 5040281000006119  
12 5048771000006110  
13 5048911000006115  
14 5048921000006111  
15 5057931000006110  
16 5153971000006113  
17 5592751000006111  
18 5592861000006115  
19 5886761000006114  
20 6583131000006110  
21 6714201000006113  
22 6946631000006113  
23 7080821000006111  
24 7100421000006116  
25 7106991000006111  
26 7252001000006111  
27 7278491000006111  
28 7298951000006115  
29 7789771000006114  
30 7855741000006112  
31 8086861000006114  
32 8086901000006119  
33 9868461000006110  
34 12122231000006112  
35 12125951000006116  
36 13919651000006113  
37 13919691000006119  
38 13964771000006111  
39 14180191000006115  
40 31287015  
41 119660019  
42 271057014  
43 299603011  
44 299604017  
45 299605016  
46 299606015  
47 299607012  
48 299608019  
49 299609010  
50 299988019

For peer review only

1  
2 299990018  
3 299991019  
4 313382012  
5 313473017  
6 313485013  
7 377722014  
8 377727015  
9 510302016  
10 1232103019  
11 116861000006111  
12 172601000006117  
13 580501000006119  
14 585311000006117  
15 884031000006113  
16 2210341000000113  
17 5056701000006119  
18 5056721000006112  
19 5058151000006118  
20 5061331000006113  
21 5503471000006117  
22 5590561000006116  
23 7075031000006117  
24 7111971000006119  
25 13501811000006118  
26 13717171000006112  
27 13936851000006111  
28 13936861000006113  
29 13936871000006118  
30 13936881000006115  
31 13936891000006117  
32 13936901000006118  
33 14194191000006114  
34 14194661000006111  
35 300022014  
36 124807019  
37 141891015  
38 150511013  
39 299958011  
40 300911012  
41 488551000006110  
42 6611081000006118  
43 6873341000006113  
44 104563015  
45 265692011  
46 295680015  
47 295681016  
48 297013012  
49 300244012  
50 300253017  
51 300257016  
52

For peer review only



1  
2 300277011  
3 300287010  
4 300374018  
5 300379011  
6 300401011  
7 300402016  
8 300403014  
9 300406018  
10 300407010  
11 300418010  
12 300419019  
13 300935019  
14 300936018  
15 300944018  
16 300956017  
17 316150014  
18 316519019  
19 481028017  
20 123381000006110  
21 123441000006112  
22 123491000006115  
23 123511000006114  
24 123521000006118  
25 149701000006118  
26 163261000006119  
27 314291000000112  
28 370711000006115  
29 398571000006112  
30 399031000006111  
31 407291000006117  
32 417171000006111  
33 426481000006114  
34 428201000006119  
35 431681000006117  
36 431691000006119  
37 621391000000116  
38 696161000006115  
39 744921000006116  
40 746571000006116  
41 748941000006115  
42 800691000006113  
43 808111000006110  
44 914921000006117  
45 1130181000000113  
46 1809201000006113  
47 1809211000006111  
48 1855561000006117  
49 1855571000006112  
50 1857051000006118  
51 1972481000006114

For peer review only

1  
2 1972501000006116  
3 1972571000006110  
4 1972661000006119  
5 1972681000006112  
6 1972711000006113  
7  
8 1972731000006119  
9 1972751000006114  
10 1972791000006115  
11 1972821000006112  
12 1972831000006110  
13 1972871000006113  
14 1972911000006111  
15 1972931000006117  
16 1973221000006118  
17 1973271000006117  
18 1973341000006118  
19 1973381000006112  
20 1973401000006112  
21 1973461000006113  
22 1973531000006117  
23 1976831000006111  
24 2664611000006117  
25 2729791000000114  
26 2841141000006111  
27 2912321000006113  
28 3414231000006117  
29 3414251000006112  
30 3522701000006112  
31 3653671000006113  
32 4540691000006112  
33 4777861000006119  
34 4777881000006112  
35 4778311000006112  
36 5011581000006119  
37 5011861000006114  
38 5459271000006119  
39 5459301000006117  
40 5583021000006113  
41 5583061000006119  
42 5583081000006112  
43 5583101000006116  
44 5583121000006114  
45 5589641000006112  
46 7378421000006118  
47 7572361000006118  
48 7834511000006116  
49 7840631000006118  
50 8089231000006110  
51 8089241000006117  
52 8089851000006116  
53  
54  
55  
56  
57  
58  
59  
60

For peer review only

1  
2 8107381000006118  
3 12223101000006118  
4 12370651000006112  
5 13796131000006110  
6 13909901000006119  
7 13934381000006118  
8  
9 98484016  
10 251693011  
11 271392011  
12 271394012  
13 271400014  
14 305585018  
15 307815016  
16 307816015  
17 307819010  
18 307821017  
19 307826010  
20 307827018  
21 307831012  
22 307832017  
23 307833010  
24 307834016  
25 307838018  
26 307847014  
27 307856018  
28 307861016  
29 307862011  
30 307866014  
31 307867017  
32 307868010  
33 307869019  
34 307871019  
35 307872014  
36 350517010  
37 398448013  
38 398450017  
39 451479013  
40 2549664019  
41 24951000006110  
42 24981000006119  
43 193601000006115  
44 216591000006115  
45 232951000006114  
46 261021000006119  
47 268641000006113  
48 268671000006117  
49 269411000006115  
50 269431000006114  
51 269441000006116  
52 269891000006110

For peer review only

1  
2 269901000006114  
3 479841000006113  
4 479891000006116  
5 479901000006117  
6 632111000000118  
7  
8 888731000006119  
9 905451000006118  
10 1142071000000114  
11 1548051000006118  
12 1749291000006113  
13 4540611000006119  
14 4666331000006118  
15 5057591000006116  
16 5057621000006119  
17 5057651000006111  
18 5057661000006113  
19 5057671000006118  
20 5057691000006117  
21 5057801000006113  
22 5645781000006111  
23 5888821000006111  
24 5888831000006114  
25 6452821000006114  
26 7126941000006112  
27 7609581000006110  
28 7617181000006110  
29 7967281000006119  
30 8042101000006112  
31 8106001000006111  
32 6978012  
33 57824015  
34 97316014  
35 198017011  
36 216207010  
37 316797019  
38 395771010  
39 1230146013  
40 2156000010  
41 2159197017  
42 2474710010  
43 2548656015  
44 2549128016  
45 311291000000114  
46 541761000006114  
47 624251000006114  
48 1734281000000117  
49 1734721000000114  
50 1976701000006111  
51 1976731000006115  
52 1976751000006110

For peer review only

1  
2 1991651000006115  
3 5125501000006111  
4 5647291000006110  
5 7119761000006112  
6 7487181000006110  
7 7487191000006113  
8 7510321000006115  
9 8035211000006110  
10 14092491000006115  
11 9988012  
12 46970012  
13 119267012  
14 256476019  
15 256477011  
16 256479014  
17 256481011  
18 256482016  
19 256483014  
20 283026012  
21 283027015  
22 283028013  
23 283030010  
24 419130013  
25 1230147016  
26 1488856013  
27 2533404015  
28 2691915013  
29 2692063011  
30 2982426011  
31 303041000000112  
32 1680541000006114  
33 1687291000006116  
34 1715351000000110  
35 2861931000006112  
36 3210341000006114  
37 3439061000006111  
38 3776881000006112  
39 5040661000006110  
40 5046591000006116  
41 5046601000006112  
42 5046621000006119  
43 5046631000006116  
44 5296151000006119  
45 5330731000006110  
46 5331151000006110  
47 5331161000006112  
48 5374491000006112  
49 5586331000006117  
50 5586351000006112  
51 5590601000006116  
52  
53  
54  
55  
56  
57  
58  
59  
60

For peer review only

1  
2 5682831000006116  
3 7073201000006115  
4 7327431000006118  
5 7450811000006118  
6 7517391000006117  
7  
8 8213971000006113  
9 8238681000006119  
10 8242031000006111  
11 256452010  
12 256453017  
13  
14 256454011  
15 256460011  
16 299707016  
17 299709018  
18  
19 299710011  
20 299712015  
21 299714019  
22 299718016  
23 299720018  
24 299721019  
25 299742017  
26  
27 299808017  
28 299811016  
29 299812011  
30 299813018  
31 300881018  
32 300882013  
33 350376014  
34 397701010  
35 451369010  
36 455422014  
37 455423016  
38 460138014  
39 460139018  
40 460141017  
41 461192018  
42 1780271011  
43 100681000006116  
44 118831000006118  
45 158601000006116  
46 158611000006118  
47 159001000006119  
48 212061000006119  
49 212071000006114  
50 212081000006112  
51 212091000006110  
52 217371000000119  
53 217381000000117  
54 217411000000115  
55 217421000000114  
56  
57  
58  
59  
60

For peer review only

1  
2 219521000000119  
3 219531000000117  
4 407181000000116  
5 408571000006116  
6 455641000006112  
7 460681000006116  
8 537751000006115  
9 543291000006110  
10 547951000006116  
11 611411000006115  
12 616081000006113  
13 667421000006117  
14 667431000006119  
15 682481000006118  
16 813961000006116  
17 884151000006119  
18 905351000006113  
19 967931000006114  
20 1576271000006117  
21 1678621000006111  
22 1686871000000113  
23 1738171000006114  
24 1741571000006114  
25 2855301000006112  
26 2855341000006114  
27 2855351000006111  
28 3024781000006112  
29 3427201000006111  
30 3452181000006112  
31 3459561000006119  
32 3551171000006114  
33 3565871000006113  
34 3576371000006117  
35 3641641000006116  
36 3699921000006110  
37 3745741000006117  
38 4775931000006111  
39 5056411000006110  
40 5056421000006119  
41 5056431000006116  
42 5056441000006114  
43 5056461000006113  
44 5495521000006113  
45 5569701000006117  
46 5605381000006117  
47 5608431000006115  
48 5935321000006111  
49 6043771000006118  
50 7208001000006118  
51 7510331000006117

For peer review only

1  
2 7571581000006113  
3 7571601000006115  
4 7571611000006117  
5 7572221000006117  
6 7572321000006112  
7  
8 7572331000006110  
9 7572341000006117  
10 7572881000006117  
11 7574041000006111  
12 7574481000006111  
13  
14 7574491000006114  
15 7662871000006115  
16 8011041000006111  
17 8087551000006113  
18 8087751000006116  
19 8193681000006118  
20 8193701000006115  
21 8308931000006114  
22 9843961000006118  
23 9843981000006111  
24 9843991000006114  
25 9868571000006116  
26 11998561000006114  
27 11998631000006118  
28 12122331000006116  
29 12122341000006114  
30 13930031000006112  
31 13935161000006114  
32 13941111000006112  
33 13941141000006111  
34 13941161000006110  
35 13941211000006118  
36 13941231000006112  
37 13945211000006116  
38 13947721000006111  
39 13961451000006111  
40 13961461000006113  
41 14015031000006119  
42 14057221000006111  
43 14132941000006118  
44 14132951000006116  
45 14145371000006117  
46 14145451000006115  
47 3288511000006116  
48 6651391000006114  
49 14132941000006118  
50 14132951000006116  
51 14145371000006117  
52 14145451000006115  
53 3288511000006116  
54 6651391000006114  
55 14132941000006118  
56 14132951000006116  
57 14145371000006117  
58 14145451000006115  
59 3288511000006116  
60

For peer review only



1  
2 6651391000006114  
3 43850011  
4 60444016  
5 90135019  
6 107545013  
7 109700019  
8 110659019  
9 143003017  
10 146259010  
11 299650019  
12 299654011  
13 299655012  
14 299673010  
15 299675015  
16 350517010  
17 411508017  
18 504901000006118  
19 728671000006119  
20 741661000006118  
21 741681000006111  
22 741691000006114  
23 741701000006114  
24 789941000006117  
25 884131000006114  
26 905451000006118  
27 1749291000006113  
28 2297871000000111  
29 2297911000000113  
30 2297951000000112  
31 2297991000000116  
32 2674471000006117  
33 3244761000006113  
34 3552501000006119  
35 3654631000006113  
36 5057801000006113  
37 5590581000006114  
38 6214751000006112  
39 7052811000006113  
40 7501601000006111  
41 7501711000006118  
42 13941061000006111  
43 13941071000006116  
44 7360241000006116  
45 82343012  
46 119481012  
47 251698019  
48 256478018  
49 256485019  
50 300130013  
51 300132017

For peer review only

1 300133010  
2 300134016  
3 350465014  
4 421235014  
5 456154015  
6 1488912012  
7 2674487014  
8 2675253013  
9 376541000000117  
10 385221000000110  
11 386991000000110  
12 636701000000115  
13 636721000000112  
14 783761000006118  
15 1547561000006113  
16 1547571000006118  
17 1547611000006111  
18 1701641000006111  
19 1810721000006117  
20 1823951000006111  
21 1905451000006118  
22 2006271000006112  
23 2309761000000114  
24 2309851000000115  
25 2805631000006119  
26 2805651000006114  
27 3063041000006112  
28 3299911000006116  
29 3679061000006111  
30 3679071000006116  
31 5046721000006110  
32 5046731000006113  
33 5046751000006118  
34 5057261000006110  
35 5669591000006113  
36 5669601000006117  
37 5669611000006119  
38 5887651000006116  
39 6016401000006115  
40 6043781000006115  
41 7064691000006118  
42 7101091000006119  
43 7152861000006115  
44 7185061000006114  
45 7254921000006110  
46 7261781000006116  
47 7275691000006117  
48 7292711000006116  
49 7338801000006111  
50 7375931000006117

For peer review only

1  
2 7428901000006112  
3 7455581000006115  
4 7594061000006119  
5 7594071000006114  
6 7610331000006110  
7  
8 7731461000006119  
9 8021691000006116  
10 8037691000006113  
11 8316981000006114  
12 8439861000006115  
13  
14 14161691000006115  
15 173401000006114  
16 173421000006116  
17 30273012  
18 64466019  
19 87208017  
20 98484016  
21 118689010  
22 129661016  
23 135665013  
24 158317012  
25 216205019  
26 251689017  
27 296931015  
28 296938014  
29 296939018  
30 296940016  
31 296947018  
32 296948011  
33 296949015  
34 296950015  
35 296951016  
36 297138017  
37 299742017  
38 300234010  
39 300312010  
40 300321011  
41 300503012  
42 300533017  
43 300534011  
44 300535012  
45 300536013  
46 300537016  
47 300538014  
48 300539018  
49 300540016  
50 300541017  
51 300542012  
52 300543019  
53 300547018  
54  
55  
56  
57  
58  
59  
60

For peer review only

1  
2 300550015  
3 300552011  
4 300553018  
5 300554012  
6 300555013  
7 300556014  
8 300557017  
9 300558010  
10 300559019  
11 300561011  
12 300562016  
13 300563014  
14 300564015  
15 300672010  
16 300673017  
17 300674011  
18 300676013  
19 300677016  
20 300681016  
21 300691010  
22 300692015  
23 300695018  
24 300696017  
25 300697014  
26 300704016  
27 300710016  
28 300711017  
29 300712012  
30 300713019  
31 300964011  
32 302984016  
33 304527018  
34 304536019  
35 305585018  
36 307739018  
37 307740016  
38 307741017  
39 307742012  
40 307747018  
41 307749015  
42 307750015  
43 307780013  
44 307781012  
45 307782017  
46 307815016  
47 307832017  
48 307833010  
49 307834016  
50 307838018  
51 307861016  
52  
53  
54  
55  
56  
57  
58  
59  
60

For peer review only

1  
2 307862011  
3 307866014  
4 307867017  
5 307868010  
6 307869019  
7 307871019  
8 307872014  
9 307872014  
10 325205013  
11 345723011  
12 350892013  
13 395794011  
14 395795012  
15 395796013  
16 395801015  
17 395803017  
18 395803017  
19 398450017  
20 411540018  
21 412645018  
22 419640012  
23 437622013  
24 449993015  
25 451478017  
26 451479013  
27 452963015  
28 453210011  
29 494431010  
30 495552014  
31 497563011  
32 497564017  
33 503317010  
34 1227369013  
35 1235655012  
36 1235913017  
37 1786197015  
38 1786198013  
39 2162148012  
40 2162149016  
41 2162422011  
42 2534187010  
43 2675439010  
44 2675878019  
45 2695366017  
46 2795114019  
47 3505881015  
48 3511086012  
49 3511955015  
50 3511959014  
51 3636257010  
52 3636258017  
53 19801000006110  
54  
55  
56  
57  
58  
59  
60

For peer review only

1  
2 19831000006119  
3 19841000006112  
4 19851000006114  
5 19861000006111  
6 19871000006116  
7  
8 19881000006118  
9 24951000006110  
10 24981000006119  
11 24991000006116  
12 100681000006116  
13 100691000006118  
14 100701000006118  
15 100721000006111  
16 100771000006112  
17  
18 100811000006112  
19 100821000006116  
20 200961000006116  
21 211691000006114  
22 215511000000110  
23 216571000006116  
24 217601000000119  
25 218541000000116  
26 218551000000118  
27 231561000006110  
28 238581000006112  
29 238621000006112  
30 238651000006115  
31 268641000006113  
32 268671000006117  
33 269411000006115  
34 269431000006114  
35 269441000006116  
36 358041000000114  
37 359731000000112  
38 359871000000116  
39 420621000006111  
40 491241000006118  
41 542251000006112  
42 586241000006116  
43 632111000000118  
44 632731000006118  
45 638821000006113  
46 638871000006114  
47 801981000006111  
48 851241000006115  
49 866221000006112  
50 884141000006116  
51 884631000006118  
52 884641000006111  
53 884651000006113  
54  
55  
56  
57  
58  
59  
60

For peer review only

1  
2 884731000006110  
3 884751000006115  
4 888681000006112  
5 888691000006110  
6 888731000006119  
7  
8 905491000006112  
9 909471000006114  
10 989221000006110  
11 1119161000000115  
12 1545591000006112  
13 1548401000006112  
14 1549761000006110  
15 1729331000006116  
16 1786921000006116  
17 1848121000006110  
18 2144741000000111  
19 2168741000000113  
20 2210381000000117  
21 2234371000000119  
22 2234411000000115  
23 2234541000000115  
24 2238261000000112  
25 2238301000000119  
26 2238341000000116  
27 2488341000000112  
28 2488381000000116  
29 2608401000000118  
30 2730141000006117  
31 2751261000006119  
32 2765831000006118  
33 2784341000006116  
34 2784351000006119  
35 2837981000006113  
36 2838001000006118  
37 2856061000006119  
38 2892651000006119  
39 3123551000006116  
40 3215871000006116  
41 3244261000006119  
42 3308951000006115  
43 3331521000006116  
44 3345371000006113  
45 3414341000006115  
46 3414351000006118  
47 3439701000006113  
48 3439711000006111  
49 3462921000006119  
50 3553621000006119  
51 3614311000006116  
52 3648381000006112  
53  
54  
55  
56  
57  
58  
59  
60

For peer review only

1 3648391000006110  
2 3745871000006116  
3 3756351000006111  
4 3767281000006116  
5 3865591000006112  
6 3870981000006117  
7 3918361000006110  
8 3932731000006114  
9 3962581000006110  
10 3978101000006118  
11 4056781000006117  
12 4056971000006118  
13 4056981000006115  
14 4059051000006119  
15 4374441000006113  
16 4403261000006113  
17 4540551000006119  
18 4785671000006113  
19 5011651000006111  
20 5011661000006113  
21 5014411000006111  
22 5014421000006115  
23 5049421000006111  
24 5049471000006112  
25 5050621000006118  
26 5051301000006111  
27 5057591000006116  
28 5057621000006119  
29 5057651000006111  
30 5057661000006113  
31 5059251000006117  
32 5059271000006110  
33 5059301000006112  
34 5059321000006119  
35 5233761000006119  
36 5477661000006119  
37 5560171000006116  
38 5593331000006113  
39 5593341000006115  
40 5653441000006111  
41 5836921000006114  
42 5836951000006117  
43 5886741000006110  
44 5912511000006114  
45 5992311000006119  
46 6018491000006111  
47 6018501000006115  
48 6348261000006111  
49 6348271000006116  
50 6348281000006118

For peer review only



1  
2 6348291000006115  
3 6601121000006118  
4 6601131000006115  
5 6694741000006111  
6 6694751000006113  
7 6694761000006110  
8 6694771000006115  
9 7070211000006112  
10 7078581000006116  
11 7078591000006118  
12 7078601000006114  
13 7095381000006112  
14 7098321000006117  
15 7218941000006118  
16 7273741000006119  
17 7598991000006116  
18 7599001000006116  
19 7609581000006110  
20 7617181000006110  
21 7699481000006113  
22 7848701000006116  
23 7966351000006118  
24 7967281000006119  
25 8041571000006119  
26 8041581000006116  
27 8041601000006114  
28 8042101000006112  
29 8042511000006119  
30 8044851000006112  
31 8361011000006114  
32 8361031000006115  
33 9652981000006114  
34 12027691000006119  
35 12107671000006115  
36 12107691000006119  
37 12122311000006110  
38 12126121000006117  
39 12126161000006111  
40 12126841000006116  
41 12127261000006118  
42 12127301000006110  
43 13949481000006113  
44 14164461000006112  
45 14164481000006119  
46 14194181000006111  
47 14194871000006117  
48 1705016  
49 22613011  
50 39767019  
51 89332015

For peer review only

1  
2 100438013  
3 104563015  
4 111625010  
5 145328019  
6 145620019  
7  
8 251691013  
9 256451015  
10 294491014  
11 297013012  
12 299570018  
13 299572014  
14 299573016  
15 299630018  
16 299633016  
17 299634010  
18 299636012  
19 299637015  
20 299723016  
21 299750014  
22 299776014  
23 299800012  
24 299804015  
25 299805019  
26 299834013  
27 299835014  
28 299848013  
29 299851018  
30 299853015  
31 300374018  
32 300379011  
33 300401011  
34 300402016  
35 300403014  
36 300418010  
37 300419019  
38 300436010  
39 300510018  
40 300514010  
41 300515011  
42 300861019  
43 300867015  
44 300876010  
45 300879015  
46 300884014  
47 300886011  
48 300932016  
49 300944018  
50 300963017  
51 304524013  
52 304537011  
53  
54  
55  
56  
57  
58  
59  
60

For peer review only

1  
2 313444015  
3 350535018  
4 355548016  
5 355549012  
6 377172018  
7  
8 395756011  
9 395791015  
10 397829016  
11 400805012  
12 411904010  
13 451368019  
14 451372015  
15 451376017  
16 459488019  
17 459859010  
18 477999016  
19 2534664018  
20 2534674015  
21 2536393012  
22 2537480011  
23 2675255018  
24 39111000006114  
25 52981000006112  
26 149701000006118  
27 161591000006114  
28 223951000000112  
29 235911000006116  
30 370711000006115  
31 371021000006118  
32 394541000006112  
33 407291000006117  
34 410751000006118  
35 417171000006111  
36 424291000006117  
37 426481000006114  
38 480631000006119  
39 496981000006113  
40 496991000006111  
41 585631000000113  
42 634751000006116  
43 635641000006111  
44 800691000006113  
45 818521000006112  
46 883951000006115  
47 883981000006111  
48 884101000006118  
49 884161000006117  
50 884181000006110  
51 884201000006111  
52 884211000006114

For peer review only

1 884611000006112  
2 884621000006116  
3 905361000006110  
4 905441000006115  
5 906771000006113  
6 908791000006113  
7 968201000006114  
8 989111000006113  
9 1130181000000113  
10 1539331000006118  
11 1823891000006113  
12 1895641000006114  
13 2115181000000110  
14 2504421000006117  
15 2709711000006116  
16 2941981000006112  
17 3013481000006111  
18 3182531000006110  
19 3268641000006118  
20 3302691000006119  
21 3302731000006110  
22 3371381000006110  
23 3371411000006113  
24 3371421000006117  
25 3522701000006112  
26 4776031000006115  
27 4777241000006117  
28 4778311000006112  
29 5011861000006114  
30 5057981000006111  
31 5496991000006110  
32 5974561000006110  
33 6633851000006110  
34 6841231000006113  
35 6841391000006118  
36 6847761000006118  
37 6860251000006115  
38 6860261000006118  
39 6864781000006110  
40 7084801000006112  
41 7475721000006114  
42 7482951000006115  
43 7573181000006118  
44 7573211000006119  
45 7703511000006110  
46 8015271000006112  
47 8026081000006119  
48 12321891000006112  
49 13944851000006115  
50 14015031000006119

For peer review only

1  
2 14196331000006118  
3 22613011  
4 76377011  
5 77703015  
6 80189019  
7  
8 313400018  
9 313403016  
10 313423015  
11 313424014  
12 313427019  
13  
14 313439010  
15 313444015  
16 313448017  
17 315680013  
18 315686019  
19 316833010  
20 355549012  
21 377170014  
22 377172018  
23 377798017  
24 400805012  
25 400815018  
26 3527478013  
27 371771000006115  
28 580911000006114  
29 580921000006118  
30 580931000006115  
31 580941000006113  
32 580951000006110  
33 580961000006112  
34 580971000006117  
35 581261000006110  
36 582721000006116  
37 583181000006114  
38 583791000006113  
39 637121000000110  
40 905361000006110  
41 905441000006115  
42 968201000006114  
43 1547441000006113  
44 2709701000006119  
45 2709711000006116  
46 3268641000006118  
47 3285001000006119  
48 3339391000006110  
49 3371411000006113  
50 4824961000006118  
51 5327651000006111  
52 7475721000006114  
53 12126011000006114  
54  
55  
56  
57  
58  
59  
60

For peer review only

1  
2 12321891000006112  
3 18472010  
4 70653017  
5 94251011  
6 139475013  
7 139482012  
8 147247018  
9 206703015  
10 251680018  
11 299673010  
12 300179017  
13 300180019  
14 300217019  
15 305601017  
16 317955011  
17 324974014  
18 324975010  
19 325061011  
20 350484012  
21 395772015  
22 412678013  
23 451426015  
24 453099015  
25 493287011  
26 510016018  
27 1488804017  
28 2549208013  
29 2675255018  
30 223981000000118  
31 504901000006118  
32 504911000006115  
33 728671000006119  
34 728681000006116  
35 741681000006111  
36 741691000006114  
37 741701000006114  
38 789941000006117  
39 905391000006119  
40 1647701000000118  
41 1661371000000112  
42 1747691000006119  
43 2227501000000110  
44 2352391000000117  
45 2504341000006116  
46 2585431000006117  
47 2660881000006116  
48 2664351000006113  
49 3182541000006117  
50 3182551000006115  
51 3182561000006118

For peer review only

1  
2 3213831000006118  
3 3244761000006113  
4 3283871000006117  
5 3489281000006119  
6 3589241000006116  
7 3868341000006118  
8 3886041000006118  
9 3886061000006119  
10 4193361000006119  
11 4540521000006111  
12 6043761000006113  
13 6204381000006117  
14 6914191000006115  
15 6919191000006119  
16 7025691000006110  
17 7052811000006113  
18 7056281000006118  
19 7250571000006113  
20 7251291000006119  
21 7321121000006119  
22 7507301000006110  
23 7510341000006110  
24 7573171000006116  
25 7573181000006118  
26 7573191000006115  
27 7573201000006117  
28 7573211000006119  
29 8011111000006111  
30 8030311000006111  
31 8048061000006111  
32 13910671000006110  
33 13971301000006111  
34 14015051000006114  
35  
36  
37  
38  
39  
40  
41  
42  
43  
44  
45  
46  
47  
48  
49  
50  
51  
52  
53  
54  
55  
56  
57  
58  
59  
60

For peer review only

1 Term  
2  
3 Congenital retinal aneurysm  
4 Repair of aneurysm of coronary artery  
5 Congenital cerebral arteriovenous aneurysm  
6 Aneurysm of conjunctiva  
7 Aneurysm of iliac artery  
8 Ruptured abdominal aortic aneurysm  
9 Congenital aneurysm of aorta  
10 Aneurysm of internal carotid artery  
11 Aneurysm of hepatic artery  
12 Aneurysm of renal artery  
13 Aneurysm of subclavian artery  
14 Aneurysm of axillary artery  
15 Aneurysm of popliteal artery  
16 Coronary artery aneurysm  
17 Aneurysm of external carotid artery  
18 Aneurysm of heart  
19 Aneurysm of superior mesenteric artery  
20 Aortic aneurysm  
21 Aneurysm of splenic artery  
22 Thoracic aortic aneurysm without mention of rupture  
23 Aneurysm of femoral artery  
24 Aneurysm of coeliac artery  
25 H/O: aortic aneurysm  
26 O/E - arterial wall - aneurysm  
27 O/E - retinal microaneurysms  
28 Replacement of aneurysmal bifurcation of aorta NOS  
29 Emergency replacement of aneurysmal segment of aorta  
30 Emergency repair of aortic aneurysm  
31 Emergency replacement of aneurysmal segment of aorta NOS  
32 Other replacement of aneurysmal segment of aorta NOS  
33 Operation on aneurysm of aorta NEC  
34 Operation on aneurysm of carotid artery  
35 Excision of aneurysm of cerebral artery  
36 Excision of aneurysm of circle of Willis  
37 Clipping of aneurysm of circle of Willis  
38 Ligation of aneurysm of cerebral artery NEC  
39 Ligation of aneurysm of circle of Willis NEC  
40 Obliteration of aneurysm of cerebral artery  
41 Obliteration of aneurysm of circle of Willis  
42 Operation on aneurysm of subclavian artery  
43 Operation on aneurysm of axillary artery  
44 Operation on aneurysm of brachial artery  
45 Operation on aneurysm of vertebral artery  
46 Operation on aneurysm of renal artery  
47 Operation on aneurysm of coeliac artery NEC  
48 Operation on aneurysm of superior mesenteric artery NEC  
49 Operation on aneurysm of suprarenal artery NEC  
50 Other specified replacement of aneurysmal iliac artery  
51 Replacement of aneurysmal iliac artery NOS  
52  
53  
54  
55  
56  
57  
58  
59  
60



1  
2 Operation on aneurysm of iliac artery NEC  
3 Ligation of aneurysm of popliteal artery  
4 Operation on aneurysm of femoral artery NEC  
5 Operation on aneurysm of artery NEC  
6 Rupture of syphilitic cerebral aneurysm  
7 Retinal microaneurysm  
8 Aneurysm of heart NOS  
9 Pulmonary artery aneurysm  
10 Aneurysm of pulmonary artery  
11 Ruptured berry aneurysm  
12 Nonruptured cerebral aneurysm due to dissection of cerebral artery  
13 Thoracic aortic aneurysm which has ruptured  
14 Ruptured thoracic aortic aneurysm  
15 Abdominal aortic aneurysm  
16 AAA - Abdominal aortic aneurysm without mention of rupture  
17 Ruptured aortic aneurysm  
18 Thoracoabdominal aortic aneurysm, ruptured  
19 Aortic aneurysm without mention of rupture NOS  
20 Thoracoabdominal aortic aneurysm  
21 Leaking abdominal aortic aneurysm  
22 Aortic aneurysm NOS  
23 Aneurysm  
24 Aneurysm of brachial artery  
25 Aneurysm of radial artery  
26 Aneurysm of ulnar artery  
27 Aneurysm of arm artery NOS  
28 Aneurysm of common iliac artery  
29 Aneurysm of external iliac artery  
30 Aneurysm of internal iliac artery  
31 Aneurysm of iliac artery NOS  
32 Aneurysm of anterior tibial artery  
33 Aneurysm of dorsalis pedis artery  
34 Aneurysm of posterior tibial artery  
35 Aneurysm of leg artery NOS  
36 Aneurysm of other artery  
37 Aneurysm of neck artery NOS  
38 Aneurysm of inferior mesenteric artery  
39 Aneurysm of other visceral artery  
40 Other aneurysm NOS  
41 Aneurysm NOS  
42 [X]Aortic aneurysm of unspecified site, ruptured  
43 [X]Aortic aneurysm of unspecified site, nonruptured  
44 Arterial aneurysm  
45 [X]Aneurysm of aorta in diseases classified elsewhere  
46 Congenital coronary aneurysm  
47 Congenital aneurysm of heart  
48 Congenital brain aneurysm NEC  
49 Congenital aneurysm NEC  
50 Emergency replacement of aneurysmal popliteal artery  
51 Emergency replacement of aneurysmal deep femoral artery

1  
2 Emergency replacement of aneurysmal common femoral artery  
3 Aortic aneurysm repair  
4 Y graft of abdominal aortic aneurysm - emergency  
5 Tube graft of Abdominal aortic aneurysm  
6 Tube graft abdominal aortic aneurysm - emergency  
7 Replacement of aneurysmal iliac artery by anastomosis  
8 Cirroid aneurysm  
9 Congenital renal artery aneurysm  
10 Acquired renal artery aneurysm  
11 Retinal macroaneurysm  
12 Other replacement of aneurysmal segment of aorta  
13 Replacement of aneurysmal iliac artery  
14 Other replacement of aneurysmal femoral artery  
15 Other cardiac wall aneurysm  
16 Congenital peripheral aneurysm  
17 Y graft abdominal Aortic aneurysm  
18 Other replacement of aneurysmal superficial femoral artery  
19 Other replacement of aneurysmal common femoral artery  
20 Other replacement of aneurysmal deep femoral artery  
21 Repair of aneurysm with graft of popliteal artery  
22 Mural cardiac aneurysm  
23 Vertebral artery aneurysm  
24 Ruptured popliteal artery aneurysm  
25 Ruptured suprarenal aortic aneurysm  
26 Juxtarenal aortic aneurysm  
27 Inflammatory abdominal aortic aneurysm  
28 Syphilitic aortic aneurysm  
29 Aneurysm of leg artery  
30 Aneurysm of artery of arm  
31 Clipping of aneurysm of cerebral artery  
32 Abdominal aortic aneurysm which has ruptured  
33 Cerebral aneurysm, nonruptured  
34 Cardiac aneurysm  
35 Ventricular cardiac aneurysm  
36 Percutaneous coil embolisation of cerebral artery aneurysm  
37 FH: Aortic aneurysm  
38 Dissecting aortic aneurysm  
39 Aneurysm of suprarenal aorta  
40 Repair of right ventricular aneurysm  
41 Repair of left ventricular aneurysm  
42 Non-ruptured acquired cerebral aneurysm  
43 Aneurysm of basilar artery  
44 Other replacement aneurysmal femoral artery by anastomosis  
45 Other replacement of aneurysmal femoral/popliteal artery NOS  
46 Other replacement of aneurysmal femoral/popliteal artery OS  
47 Other replacement of aneurysmal segment of aorta OS  
48 Operation on cerebral artery/ circle of Willis aneurysm NOS  
49 Operation on cerebral artery/ circle of Willis aneurysm OS  
50 Operation on aneurysm visceral branch of abdominal aorta NEC  
51 Replace aneurysm abdominal aorta by anast aorta to aorta NEC  
52  
53  
54  
55  
56  
57  
58  
59  
60

- 1
- 2 Replace aneurysm ascend aorta by anast of aorta/aorta NEC
- 3 Replacement of aneurysmal bifurcation of aorta by anastomosis of aorta to femoral artery
- 4 Replacement of aneurysmal bifurcation of aorta by anastomosis of aorta to iliac artery
- 5 Replace aneurysm com iliac a by aorta/com iliac a anast NEC
- 6 Replace aneurysm fem art by fem/peron art anast c prosth NEC
- 7 Replace aneurysm fem art by fem/pop a anast c vein graft NEC
- 8 Replace aneurysm fem art by fem/pop art anastom c prosth NEC
- 9 Replace aneurysm fem art by fem/tib a anast c vein graft NEC
- 10 Replace aneurysm fem art by fem/tib art anast c prosth NEC
- 11 Replace aneurysm fem artery by fem/fem art anastomosis NEC
- 12 Replace aneurysm iliac art by aorta/ext iliac art anast NEC
- 13 Replace aneurysm iliac artery by iliac/iliac art anast NEC
- 14 Replace aneurysm leg artery by aorta/com fem art anast NEC
- 15 Replace aneurysm leg artery by aorta/sup fem art anast NEC
- 16 Replace aneurysm pop art by pop/peron art anast c prosth NEC
- 17 Replace aneurysm pop art by pop/pop a anast c vein graft NEC
- 18 Replace aneurysm pop art by pop/pop art anastom c prosth NEC
- 19 Replace aneurysm pop art by pop/tib a anast c vein graft NEC
- 20 Replace aneurysm pop art by pop/tib art anast c prosth NEC
- 21 Replace aneurysm popliteal artery by pop/fem anastomosis NEC
- 22 Replace aneurysm thoracic aorta by anast of aorta/aorta NEC
- 23 Replace aneurysmal iliac art by iliac/femoral art anast NEC
- 24 Replace aneurysmal iliac artery by fem/fem artery anast NEC
- 25 Replacement of aneurysmal bifurcation of aorta
- 26 Replacement of aneurysmal bifurcation of aorta OS
- 27 Pulmonary arterio-venous aneurysm
- 28 Peripheral arterio-venous aneurysm
- 29 Transluminal operations on aneurysmal segment of aorta
- 30 Repair of thoracic aortic aneurysm with insertion of endovascular stent
- 31 Embolisation of aneurysm using transluminal coil
- 32 Endovascular stenting of aorto-uniiliac aneurysm
- 33 Repair of suprarenal abdominal aortic aneurysm with insertion of endovascular stent
- 34 Other transluminal embolisation of aneurysm
- 35 Other specified transluminal coil embolisation of aneurysm
- 36 Balloon assisted embolisation of aneurysm using transluminal coil
- 37 Transluminal coil embolisation of aneurysm NOS
- 38 Other specified other transluminal embolisation of aneurysm
- 39 Transluminal operations on aneurysmal segment of aorta NOS
- 40 Stent assisted embolisation of aneurysm using transluminal coil
- 41 Other transluminal embolisation of aneurysm NOS
- 42 Aneurysm of common carotid art
- 43 Aneurysm of sinus of Valsalva
- 44 Abdominal aortic aneurysm stenting
- 45 Endovascular stenting for aorto-uniiliac aneurysm
- 46 Aortic aneurysm - syphilitic
- 47 Operations on aneurysm of cerebral artery or circle of Willis
- 48 Cerebral artery aneurysm operations
- 49 Circle of Willis aneurysm operations
- 50 Emergency replacement of aneurysmal bifurcation of aorta by anastomosis of aorta to femoral artery
- 51 Emergency replacement of aneurysmal bifurcation of aorta by anastomosis of aorta to iliac artery
- 52
- 53
- 54
- 55
- 56
- 57
- 58
- 59
- 60

1  
2 Emergency replacement of aneurysmal common iliac artery by anastomosis of aorta to common iliac artery  
3 Emergency replacement of aneurysmal iliac artery by anastomosis of aorta to external iliac artery  
4 Emergency replacement of aneurysmal popliteal artery by anastomosis of popliteal artery to popliteal artery u  
5 Emerg replace aneurysm abdom aorta by anast aorta/aorta NEC  
6 Emergency replacement of aneurysmal segment of ascending aorta by anastomosis of aorta to aorta  
7  
8 Emergency replacement of aneurysmal femoral artery by anastomosis of femoral artery to popliteal artery usi  
9 Emergency replacement of aneurysmal femoral artery by anastomosis of femoral artery to popliteal artery usi  
10 Emergency replacement of aneurysmal femoral artery by anastomosis of femoral artery to femoral artery  
11 Emergency replacement of aneurysmal femoral artery by anastomosis of femoral artery to tibial artery using p  
12  
13 Emergency replacement of aneurysmal iliac artery by anastomosis of iliac artery to femoral artery  
14  
15 Emergency replacement of aneurysmal segment of infrarenal abdominal aorta by anastomosis of aorta to aort  
16  
17 Emergency replacement of aneurysmal artery of leg by anastomosis of aorta to common femoral artery  
18  
19 Emergency replacement of aneurysmal artery of leg by anastomosis of aorta to superficial femoral artery  
20  
21 Emergency replacement of aneurysmal popliteal artery by anastomosis of popliteal artery to peroneal artery u  
22  
23 Emergency replacement of aneurysmal popliteal artery by anastomosis of popliteal artery to popliteal artery u  
24  
25 Emergency replacement of aneurysmal popliteal artery by anastomosis of popliteal artery to tibial artery using  
26  
27 Emergency replacement of aneurysmal popliteal artery by anastomosis of popliteal artery to tibial artery using  
28  
29 Emergency replacement of aneurysmal popliteal artery by anastomosis of popliteal artery to femoral artery  
30  
31 Emergency replacement of aneurysmal segment of suprarenal abdominal aorta by anastomosis of aorta to aor  
32  
33 Emergency replacement of aneurysmal segment of thoracic aorta by anastomosis of aorta to aorta  
34  
35 Emergency replacement of aneurysmal iliac artery by anastomosis of femoral artery to femoral artery  
36  
37 Emergency replacement of aneurysmal femoral or popliteal artery by anastomosis  
38  
39 Emergency replacement aneurysmal femoral/popliteal art NOS  
40  
41 Emergency replacement aneurysmal femoral/popliteal artery OS  
42  
43 Emergency replacement of aneurysmal superficial femoral artery  
44  
45 Emergency replacement of aneurysmal femoral or popliteal artery  
46  
47 Emergency replacement of aneurysmal segment of aorta OS  
48  
49 Endovascular insertion of stent for thoracic aortic aneurysm  
50  
51 Endovascular insertion of stent for aorto-uniliac aneurysm  
52  
53 Ruptured heart aneurysm repair  
54  
55 Heart aneurysm excision  
56  
57 Aneurysmectomy  
58  
59 Aneurysmorrhaphy  
60  
61 Clipping - aneurysm  
62  
63 Aneurysm excision+reanastomos.  
64  
65 Cerebral aneurysm-non ruptured  
66  
67 Thoracic aortic aneurysm  
68  
69 Abdominal aortic aneurysm  
70  
71 [RFC] Aneurysms  
72  
73 Aneurysm excision+reanastomos.  
74  
75 Aneurysm excision+reanastomos.  
76  
77 Repair of aneurysm of sinus of Valsalva  
78  
79 Repair of infrarenal abdominal aortic aneurysm with insertion of endovascular stent  
80  
81 OS transluminal operations on aneurysmal segment of aorta  
82  
83 Percutaneous transluminal coil embolisation of small aneurysm  
84  
85 Percutaneous transluminal coil embolisation of medium aneurysm  
86  
87 Percutaneous transluminal coil embolisation of large aneurysm  
88  
89 Percutaneous transluminal coil embolisation of giant aneurysm  
90  
91 Perc translum ball assist coil embolisat three more aneurysm

1 Perc translum balloon assist coil embolis two aneurysms  
2 Perc translum balloon assist coil embolisat single aneurysm  
3 OS transluminal balloon assisted coil embolisation aneurysm  
4 Transluminal balloon assisted coil embolisation aneurysm NOS  
5 Perc translumin stent assis coil embolis three more aneurysm  
6 Perc translum stent assisted coil embolisation two aneurysms  
7 Percutaneous transluminal stent assisted coil embolisation of aneurysm  
8 OS transluminal stent assisted coil embolisation of aneurysm  
9 Transluminal stent assisted coil embolisation aneurysm NOS  
10 Percutaneous transluminal embolisation of aneurysm using liquid polymer  
11 Stent assisted percutaneous transluminal embolisation of aneurysm using liquid polymer  
12 Transluminal insertion of stent graft for aneurysmal segment of aorta  
13 Repair of aorto-uniliac aneurysm with insertion of endovascular stent graft  
14 Endovascular insertion of stent graft for suprarenal aortic aneurysm  
15 Repair of thoracic aortic aneurysm with insertion of endovascular stent graft  
16 Endovas insertion of stent graft for aorto-uniliac aneurysm  
17 OS translum ins stent graft for aneurysmal segment of aorta  
18 Translum ins stent graft for aneurysmal segment of aorta NOS  
19 Endovascular insertion of stent for infrarenal abdominal aortic aneurysm  
20 Endovascular insertion of stent for suprarenal aortic aneurysm  
21 Endovas insert stent for aortic aneurysm of bifurcation NEC  
22 Infrarenal abdominal aortic aneurysm  
23 Aneurysm of infrarenal abdominal aorta  
24 Retinal macroaneurysm  
25 Aortic aneurysm monitoring  
26 Hered angiopathy with nephropathy, aneurysms + muscle cramp synd  
27 Hereditary angiopathy with nephropathy, aneurysms and muscle cramps syndrome  
28 NHS abdominal aortic aneurysm screening programme initial screening shows abdominal aortic aneurysm, pla  
29 NHS abdominal aortic aneurysm screening programme initial screening shows large abdominal aortic aneurysr  
30 Aneurysm of vein of transplanted kidney  
31 Aneurysm of artery of transplanted kidney  
32 Repair of aneurysm of coronary artery  
33 Repair of coronary artery aneurysm  
34 Aneurysm of common carotid artery  
35 Racemose aneurysm  
36 Repair of thoracic aortic aneurysm  
37 Aneurysm of artery of lower extremity  
38 Aneurysm of lower limb artery  
39 Internal carotid aneurysm  
40 Diabetic retinal microaneurysm  
41 Hepatic artery aneurysm  
42 Aneurysm of gastroduodenal artery  
43 Retinal microaneurysms  
44 Nonruptured cerebral aneurysm  
45 Unruptured cerebral aneurysm  
46 Repair of aneurysm by endovascular coil embolisation  
47 Ligation of aneurysm  
48 Popliteal artery aneurysm  
49 Aneurysm of coronary vessels  
50 Mycotic aneurysm

1  
2 Congenital aneurysm of sinus of Valsalva  
3 Sinus of Valsalva aneurysm  
4 Traumatic arterial aneurysm  
5 Aneurysm of aorta  
6 Repair of aneurysm with graft of radial artery  
7 Splenic artery aneurysm  
8 Thoracic aortic aneurysm without rupture  
9 Repair of aneurysm  
10 Abdominal aortic aneurysm without rupture  
11 Intracerebral aneurysm clipped  
12 Fusiform aneurysm  
13 Aneurysm  
14 Aneurysmal dilatation  
15 Microaneurysm  
16 Ventricular aneurysm  
17 Atrial septal aneurysm  
18 Coeliac artery aneurysm  
19 Aneurysmectomy  
20 Thrombosed aneurysm  
21 Multiple aneurysms  
22 Cerebral arterial aneurysm  
23 Intracranial aneurysm  
24 Repair of aortic aneurysm using bifurcation graft  
25 AAA - Repair of abdominal aortic aneurysm using bifurcation graft  
26 Brachial artery aneurysm  
27 Radial artery aneurysm  
28 Ulnar artery aneurysm  
29 Common iliac aneurysm  
30 External iliac aneurysm  
31 Internal iliac aneurysm  
32 Anterior tibial aneurysm  
33 Posterior tibial aneurysm  
34 Inferior mesenteric aneurysm  
35 Subarachnoid haemorrhage due to ruptured aneurysm  
36 Intracranial aneurysm operation  
37 Clipping of intracranial aneurysm  
38 Embolisation of intracranial aneurysm  
39 Repair of aortic aneurysm using straight graft  
40 AAA - Repair of abdominal aortic aneurysm using straight graft  
41 Ruptured cerebral aneurysm  
42 AAA - Abdominal aortic aneurysm  
43 Carotid artery aneurysm  
44 Mycotic aneurysm  
45 Aneurysm of vein  
46 Aneurysmal  
47 Aneurysm of membranous septum  
48 Aneurysm clipping  
49 Unruptured aneurysm of middle cerebral artery  
50 Unruptured aneurysm of anterior communicating artery  
51 Unruptured aneurysm of posterior communicating artery

- 1 Unruptured aneurysm of basilar artery
- 2 Unruptured aneurysm of carotid artery
- 3 Subarachnoid haemorrhage from middle cerebral artery aneurysm
- 4 Subarachnoid haemorrhage from anterior communicating artery aneurysm
- 5 Subarachnoid haemorrhage from posterior communicating artery aneurysm
- 6 Subarachnoid haemorrhage from basilar artery aneurysm
- 7 Subarachnoid haemorrhage from posterior inferior cerebellar artery aneurysm
- 8 Types of aneurysms
- 9 Berry aneurysm
- 10 Saccular aneurysm
- 11 Ruptured aneurysm of anterior cerebral artery
- 12 Ruptured aneurysm of middle cerebral artery
- 13 Ruptured aneurysm of basilar artery
- 14 Ruptured internal carotid-posterior communicating artery zone aneurysm
- 15 Congenital arterial aneurysm
- 16 Left ventricular aneurysm
- 17 Left ventricular wall aneurysmal
- 18 LVA - Left ventricular aneurysm
- 19 Aneurysm of head and neck artery
- 20 Repair of thoracoabdominal aortic aneurysm
- 21 Leber's miliary aneurysms
- 22 Aneurysm of aortic root
- 23 Femoro-proximal popliteal artery bypass for repair of aneurysm with vein
- 24 Repair of aneurysm of abdominal aorta
- 25 Repair of hepatic artery aneurysm
- 26 Enlarging abdominal aortic aneurysm
- 27 Aneurysm of ascending aorta
- 28 Aneurysm of descending aorta
- 29 Stent assisted embolization of aneurysm using transluminal coil
- 30 Embolization of aneurysm using transluminal coil
- 31 Repair of suprarenal aortic aneurysm with insertion of endovascular stent graft
- 32 Aneurysm of thoracic aorta
- 33 Percutaneous balloon assisted coil embolisation of cerebral aneurysm using fluoroscopic guidance
- 34 Endovascular repair of aneurysm of iliac artery
- 35 Repair of aneurysm of suprarenal abdominal aorta with insertion of endovascular stent
- 36 Endovascular repair of abdominal aortic aneurysm
- 37 Craniotomy and clipping of intracranial aneurysm
- 38 Elective repair of infrarenal abdominal aortic aneurysm
- 39 Aneurysm of descending thoracic aorta
- 40 Leaking thoracic aortic aneurysm
- 41 CT surveillance post-EVAR (endovascular aneurysm repair)
- 42 Aneurysm of right renal artery
- 43 Aneurysm of right common iliac artery
- 44 Aneurysm of left common iliac artery
- 45 Aneurysm of right internal iliac artery
- 46 Aneurysm of left internal iliac artery
- 47 Aneurysm of left popliteal artery
- 48 Repair of suprarenal abdominal aortic aneurysm with insertion of endovascular stent
- 49 Repair of abdominal aortic aneurysm with insertion of stent
- 50 Aneurysm of internal carotid bifurcation



1 Aneurysm of anterior cerebral artery  
2 Aneurysm of anterior communicating artery  
3 Aneurysm of middle cerebral artery  
4 Aneurysm of posterior communicating artery  
5 Macroaneurysm  
6 Microaneurysm of retinal artery  
7 CT of aortic aneurysm with contrast  
8 May-Thurner syndrome  
9 Thoracic outlet syndrome  
10 Thoracic outlet syndrome of right thoracic outlet  
11 Decompression of thoracic outlet by myotomy of scalenus anticus muscle  
12 Neurogenic thoracic outlet syndrome  
13 Decompression of thoracic outlet by tenotomy  
14 Arterial thoracic outlet syndrome due to cervical rib  
15 Fibromuscular hyperplasia of arteries NOS  
16 Arterial fibromuscular dysplasia  
17 Fibromuscular dysplasia of renal artery  
18 Fibromuscular dysplasia  
19 Fibromuscular hyperplasia of artery  
20 FMD - Fibromuscular dysplasia  
21 Fibromuscular dysplasia of wall of artery  
22 Fibromuscular hyperplasia of artery  
23 Fibromuscular dysplasia of wall of renal artery  
24 Klippel Trenaunay syndrome  
25 Chronic acquired lymphedema  
26 Lymphedema  
27 Hereditary lymphedema  
28 Lymphedema of upper limb  
29 Lymphedema of bilateral lower limbs  
30 Orthostatic hypotension  
31 Postural hypotension  
32 Hypotension  
33 Chronic hypotension  
34 Idiopathic hypotension  
35 Hypotension NOS  
36 [X]Other hypotension  
37 Hypotensive therapy  
38 Chronic hypotension-idiopathic  
39 Idiopathic intracranial hypotension  
40 Hypotensive syncope  
41 Sympathotonic orthostatic hypotension  
42 Syncope due to orthostatic hypotension  
43 Refractory hypotension  
44 Intracranial hypotension  
45 Purpura annularis telangiectodes  
46 Retinal telangiectasia  
47 Cutis marmorata telangiectasia congenita  
48 Telangiectasia disorder  
49 Hereditary haemorrhagic telangiectasia  
50 Macular telangiectasia



- 1
- 2 Acne rosacea, erythematous telangiectatic type
- 3 Osler haemorrhagic telangiectasia syndrome
- 4 HHT - Hereditary haemorrhagic telangiectasia
- 5 HHT - Hereditary hemorrhagic telangiectasia
- 6 Capillary telangiectasia
- 7
- 8 Purpura annularis telangiectodes of Majocchi
- 9 Telangiectasia of colon
- 10 Bladder telangiectasia
- 11 Telangiectasis
- 12 Telangiectasia
- 13
- 14 Spider telangiectasia
- 15 Parafoveal telangiectasia
- 16 Acquired peripheral telangiectasia
- 17 Telangiectasis of vocal fold
- 18 Generalised essential telangiectasia
- 19 Hereditary benign telangiectasia
- 20
- 21 Arborising telangiectasia
- 22 Solar telangiectasia
- 23 Cutis marmorata telangiectatica congenita
- 24 Idiopathic juxtafoveal telangiectasia
- 25
- 26 Telangiectasias of lid margin
- 27 Telangiectasia of skin of face
- 28 Venous telangiectases of the lower limb
- 29 Essential telangiectasia
- 30 Unilateral naevoid telangiectasia
- 31
- 32 Vasculitis
- 33 Nodular vasculitis
- 34 Cryoglobulinaemic vasculitis
- 35 Retinal vasculitis
- 36 [X]Vasculitis limited to skin, unspecified
- 37
- 38 Livedoid vasculitis
- 39 Rheumatoid vasculitis
- 40 Antineutrophil cytoplasmic antibody (ANCA) positive vasculitis
- 41 Vasculitis of the skin
- 42 Necrotising vasculitis
- 43 Vasculitic rash
- 44 Vasculitic eruption
- 45
- 46 Lymphocytic vasculitis of skin
- 47 Systemic vasculitis
- 48 Leukocytoclastic vasculitis
- 49 Allergic vasculitis
- 50
- 51 Hypersensitivity vasculitis
- 52 Leucocytoclastic vasculitis
- 53 Henoch-Schoenlein vasculitis
- 54 Neuropathy in vasculitis and connective tissue disease
- 55 Primary cutaneous vasculitis
- 56 Necrotising rheumatoid vasculitis
- 57
- 58 Lupus vasculitis
- 59 Hypocomplementaemic urticarial vasculitis
- 60 Urticarial vasculitis

1 Vasculitic neuropathy  
2 Cerebral vasculitis  
3 H/O vasculitis  
4 Large vessel vasculitis  
5 Small vessel vasculitis  
6 Medium vessel vasculitis  
7 ANCA (anti neutrophil cytoplasmic antibody) associated vasculitis  
8 Left retinal vasculitis  
9 Bilateral retinal vasculitis  
10 Immunoglobulin A vasculitis  
11 Postinfective immunoglobulin A vasculitis  
12 Intermittent claudication  
13 Claudication distance  
14 Claudication  
15 Neurogenic claudication  
16 Vascular claudication  
17 IC - Intermittent claudication  
18 Venous intermittent claudication  
19 Venous claudication  
20 H/O intermittent claudication  
21 H/O: varicose veins  
22 O/E - varicose veins  
23 Ligation of recurrent varicose vein of leg  
24 Other specified ligation of varicose vein of leg  
25 Ligation of varicose vein of leg NOS  
26 Injection of varicose vein of lower limb  
27 Injection sclerotherapy of varicose vein of lower limb  
28 Other specified injection into varicose vein of leg  
29 Injection into varicose vein of leg NOS  
30 Other operations on varicose vein of leg  
31 Local excision of varicose vein of leg  
32 Incision of varicose vein of lower limb  
33 Other specified other operation on varicose vein of leg  
34 Varicose vein operation  
35 Varicose vein operation planned  
36 Varicose veins of the leg with ulcer  
37 Varicose veins of the leg with ulcer and eczema  
38 Varicose veins of the leg with rupture  
39 Varicose veins of lower extremity  
40 Infected varicose ulcer  
41 Varicose veins of the leg NOS  
42 Other specified varicose veins  
43 Varicose veins  
44 [X]Varicose veins of other specified sites  
45 Varicose veins of leg with long saphenous vein distribution  
46 Varicose veins of leg with short saphenous vein distribution  
47 Varicose veins - obstetric  
48 Vulval obstetric varicose veins  
49 Perineal obstetric varicose veins  
50 Ligation of perforating varicose vein of leg

1 Stripping of lower limb varicose veins  
2 Avulsion of varicose vein of leg  
3 Varicose veins of the leg with eczema  
4 Varicose veins of legs in the puerperium  
5 Varicose vein of leg with phlebitis  
6 Varicose eczema  
7 Ligation of varicose vein of leg  
8 VV - Varicose veins of leg  
9 Subfascial ligation of varicose veins  
10 Endovascular radiofrequency ablation of varicose vein of leg  
11 Endovascular laser ablation of varicose vein of leg  
12 Transluminal operations on varicose vein of leg  
13 Combined operations on varicose vein of leg  
14 Transilluminated powered phlebectomy for varicose vein of leg  
15 Combined operations on varicose vein of leg NOS  
16 Other specified transluminal operations on varicose vein leg  
17 Other specified combined operations on varicose vein of leg  
18 Transluminal operations on varicose vein of leg NOS  
19 Babcock subcutaneous enucleation of varicose veins  
20 Cockett subfascial ligation of perforating varicose vein  
21 Mayo stripping of varicose vein  
22 Linton ligation of perforating varicose vein of leg  
23 Varicose vein ligation  
24 Varicose vein ligate + strip  
25 Varicose vein stripping  
26 Varicose vein ligation/strip  
27 Varicose vein op. NOS  
28 Varicose veins of legs  
29 Varicose ulcer of leg  
30 Varicose eczema - leg  
31 Varicose ulcer + inflammation  
32 Ruptured varicose veins  
33 Simple varicose veins  
34 Varicose veins NOS  
35 Varicose veins NOS  
36 Varicose veins, legs - obst.  
37 Vulval/perineal varicose veins  
38 [RFC] Varicose veins  
39 [RFC] Varicose eczema  
40 [RFC] Varicose eczema  
41 Varicose vein stripping  
42 Varicose ulcer of leg  
43 Simple varicose veins  
44 Varicose veins NOS  
45 Ultrasound guided foam sclerotherapy for varicose vein of leg  
46 Injection of sclerosing substance into varicose vein leg NEC  
47 Endovenous radiofrequency obliteration of varicose vein of lower limb  
48 Percutaneous transluminal laser ablation of varicose vein of lower limb  
49 Excision of varicose vein  
50 Varicose phlebectomy

1 Injection of sclerosing agent in varicose vein  
2 Sclerotherapy of varicose vein  
3 Varicose vein  
4 Ligation of varicose vein of lower limb  
5 Local ligation of varicose vein of leg  
6 Varicose veins of lower extremity with ulcer AND inflammation  
7 Varicose veins of lower limb  
8 Ligation of varicose vein  
9 Ruptured varicose vein of leg  
10 Bleeding varicose vein of leg  
11 Avulsion of varicose vein  
12 Multiple avulsions of varicose veins  
13 Calf perforator varicose veins  
14 Varicose  
15 Simple varicose veins  
16 Ruptured varicose veins  
17 Bleeding varicose veins  
18 Varicose eczema leg  
19 Varicose vein ligation and stripping  
20 Varicose ulcer and inflammation  
21 Varicose ulcer of lower extremity  
22 High ligation and local ligation of varicose veins  
23 Varicose veins with ulcer of lower extremity  
24 Varicose veins of leg in long saphenous vein distribution with eczema  
25 Varicose veins of leg in short saphenous vein distribution with eczema  
26 Varicose veins of leg in short saphenous vein distribution with ulcer  
27 Excision of varicose vein of lower limb  
28 Endoscopic transilluminated excision of varicose vein of leg  
29 Endovenous laser ablation of varicose vein  
30 Recurrent varicose vein of lower leg  
31 Recurrent varicose vein of lower limb  
32 Injection of varicose vein of lower leg  
33 Injection sclerotherapy of varicose vein of lower leg  
34 High ligation and stripping of long saphenous vein and multiple avulsions of varicose veins  
35 Pain due to varicose veins of leg  
36 Endovenous laser ablation of varicose vein of lower limb  
37 Ultrasound guided injection of glue to varicose vein of lower limb  
38 Endovascular laser ablation of varicose vein of leg  
39 Other operations for venous insufficiency  
40 Other specified other operation for venous insufficiency  
41 Other operation for venous insufficiency NOS  
42 Chronic venous insufficiency  
43 Peripheral venous insufficiency  
44 Venous insufficiency of leg  
45 Venous insufficiency of lower limb  
46 Primary venous insufficiency of leg  
47 Secondary venous insufficiency of leg  
48 Lymphoedema of limbs due to immobility, chronic dependency and/or venous insufficiency  
49 Ulcer of limb due to chronic venous insufficiency  
50 Lymphoedema due to venous insufficiency

1  
2 Vertebral artery dissection  
3 Carotid artery dissection  
4 Left carotid artery dissection  
5 Right vertebral artery dissection  
6 Left vertebral artery dissection  
7  
8 [M]Carotid body tumour  
9 [M]Aortic body tumour  
10 Carotid body tumour  
11 Aortic body tumour  
12 Excision of carotid body tumour  
13  
14 Cerebellar stroke syndrome  
15 Admission to stroke unit  
16 H/O: Stroke in last year  
17 Occlusive stroke  
18 [V]Personal history of stroke  
19 Referral to stroke clinic  
20  
21 H/O: stroke  
22 Haemorrhagic stroke monitoring  
23 Left hemispheric cerebellar artery embolism with stroke  
24 PASS (Postural Assessment Scale for Stroke Patients) score  
25 Exception reporting - stroke quality indicators  
26 Excepted from stroke quality indicators - patient unsuitable  
27 Excepted from stroke quality indicators - informed dissent  
28 Sequelae of stroke,not specfd as h'morrhage or infarction  
29 Did not attend stroke clinic  
30 Seen in stroke clinic  
31 Delivery of rehabilitation for stroke  
32 [X]Sequelae of stroke,not specfd as h'morrhage or infarction  
33 Brainstem stroke syndrome  
34 [RFC] Stroke/CVA  
35 [RFC] Stroke  
36 [RFC] Stroke  
37  
38 MELAS - Mitochondrial encephalopathy, lactic acidosis and stroke-like episodes  
39 Referral to multidisciplinary stroke function improvement service  
40 Annual Stroke/CVA blood test  
41 Suspected stroke  
42 Suspected stroke  
43 Referral for multidisciplinary stroke function improvement declined  
44 Referral by stroke nurse specialist  
45 VTE risk assessment - acute stroke  
46 Referral to stroke rehabilitation service  
47 Referral to community stroke service  
48 Discharge from community stroke service  
49 Completed stroke  
50  
51 Juvenile myopathy, encephalopathy, lactic acidosis AND stroke  
52 Brain stem stroke  
53 Nonparalytic stroke  
54 Total anterior cerebral circulation stroke  
55 TACS - Total anterior cerebral circulation stroke  
56 Partial anterior cerebral circulation stroke

1 PACS - Partial anterior cerebral circulation stroke  
2 Posterior cerebral circulation stroke  
3 Anterior circulation stroke of uncertain pathology  
4 Posterior circulation stroke of uncertain pathology  
5 Spinal cord stroke  
6 Referral to stroke service  
7 Discharge from stroke service  
8 Seen by stroke service  
9 Thrombotic stroke  
10 Embolic stroke  
11 Neonatal stroke  
12 Basal ganglion stroke  
13 Cardioembolic stroke  
14 Ischaemic stroke  
15 Ischemic stroke  
16 Thalamic stroke  
17 Post stroke pain  
18 Cerebral ischaemic stroke due to small artery occlusion  
19 Epilepsy due to stroke  
20 Sequela of cardioembolic stroke  
21 DNA (did not attend) stroke clinic  
22 Ischaemic stroke without coma  
23 Did not attend stroke review  
24 Management of stroke rehabilitation  
25 Acute stroke care  
26 Haemorrhagic stroke  
27 Emergency hospital admission to stroke service  
28 Cerebellar stroke  
29 History of ischaemic stroke  
30 Cerebral ischaemic stroke due to dissection of artery  
31 Cerebral ischaemic stroke due to global hypoperfusion with watershed infarct  
32 Cerebral ischaemic stroke due to hypercoagulable state  
33 Cerebral ischaemic stroke co-occurrent with subarachnoid haemorrhage  
34 Cryptogenic stroke  
35 Acute stroke due to occlusion of left posterior cerebral artery  
36 Acute stroke of brainstem  
37 Acute ischaemic stroke  
38 Stroke monitoring  
39 Stroke in the puerperium  
40 Central post-stroke pain  
41 Stroke due to basilar artery thrombus  
42 Stroke due to thrombus of right middle cerebral artery  
43 Stroke due to thrombus of left middle cerebral artery  
44 Stroke care plan  
45 Stroke due to cerebral arterial occlusion  
46 Stroke unspecified  
47 Stroke/CVA - undefined  
48 Stroke  
49 Stroke monitoring administration  
50 Stroke monitoring invite 1

- 1
- 2 Stroke monitoring invite 2
- 3 Stroke monitoring invite 3
- 4 Stroke 6 month review
- 5 Mitoch myopath/encephalopath/lactic acidosis/stroke-like episode
- 6 Central post-stroke pain
- 7
- 8 Stroke self-management plan review
- 9 Stroke self-management plan agreed
- 10 Stroke annual review
- 11 Stroke initial post discharge review
- 12 Stroke rehabilitation
- 13
- 14 Stroke
- 15 Stroke of uncertain pathology
- 16 Stroke test positive
- 17 Stroke test negative
- 18 Stroke clinic
- 19
- 20 Stroke impact scale version 3.0
- 21 Stroke impact scale version 3.0 score
- 22 Stroke/cerebrovascular accident 6 month review
- 23 Stroke medicine
- 24
- 25 Cerebral infarct due to thrombosis of precerebral arteries
- 26 Cerebral infarction due to embolism of precerebral arteries
- 27 Cerebral infarction due to thrombosis of cerebral arteries
- 28 Cerebral infarction due to embolism of cerebral arteries
- 29 Sequelae of cerebral infarction
- 30 [X]Other cerebral infarction
- 31 Cerebral infarction
- 32 Left sided cerebral infarction
- 33 Right sided cerebral infarction
- 34
- 35 Occlusion and stenosis of cerebral arteries, not resulting in cerebral infarction
- 36 [X]Cerebrl infarctn due/unspcf occlusn or sten/cerebrl artr
- 37 Cerebral infarction due to cerebral venous thrombosis, non-pyogenic
- 38 Cerebral infarction due to occlusion of precerebral artery
- 39 Cerebrl infarctn due/unspcf occlusn or sten/cerebrl artr
- 40 Cerebral autosomal dominant arteriopathy with subcortical infarcts and leukoencephalopathy
- 41 Cerebral infarction with haemorrhagic transformation
- 42 Cause of Death- Cerebral Infarct
- 43
- 44 Surveillance of Cerebral Palsy in Europe classification - predominant pattern B.2 - sequelae of intraventricular I
- 45 Surveillance of Cerebral Palsy in Europe classification - predominant pattern C.3 - infarct of the middle cerebra
- 46
- 47 Old cerebral infarction on imaging
- 48 Cerebral infarction due to occlusion of cerebral artery
- 49 Cerebral infarction due to stenosis of cerebral artery
- 50
- 51 Anterior cerebral circulation infarction
- 52 Total anterior cerebral circulation infarction
- 53 TACI - Total anterior cerebral circulation infarction
- 54 Partial anterior cerebral circulation infarction
- 55 PACI - Partial anterior cerebral circulation infarction
- 56 Posterior cerebral circulation infarction
- 57 Haemorrhagic cerebral infarction
- 58 Anterior cerebral circulation haemorrhagic infarction
- 59
- 60 Posterior cerebral circulation haemorrhagic infarction

1 Occipital cerebral infarction  
2 Cerebral infarction due to embolism of middle cerebral artery  
3 Cerebral infarction due to thrombosis of middle cerebral artery  
4 Silent cerebral infarct  
5 Sequela of ischaemic cerebral infarction  
6 Cerebral degeneration in mucopolysaccharidoses  
7 Cerebrovascular accident  
8 [V]Personal history of cerebrovascular accident (CVA)  
9 Cerebrovascular accident due to thrombus of left carotid artery  
10 Cerebrovascular accident due to thrombus of basilar artery  
11 Cerebrovascular accident due to thrombus of right carotid artery  
12 Cerebrovascular accident due to thrombus of right middle cerebral artery  
13 Cerebrovascular accident due to thrombus of left middle cerebral artery  
14 Cerebrovascular accident due to occlusion of left pontine artery  
15 Cerebrovascular accident due to occlusion of right posterior cerebral artery  
16 Cerebrovascular accident due to occlusion of left middle cerebral artery  
17 Cerebrovascular accident due to occlusion of left posterior cerebral artery  
18 Cerebrovascular accident due to occlusion of right middle cerebral artery  
19 Cerebrovascular accident due to occlusion of right middle cerebral artery by embolus  
20 CVA - cerebrovascular accident due to cerebral artery occlusion  
21 CVA - cerebrovascular accident in the puerperium  
22 CVA - Cerebrovascular accident  
23 History of cerebrovascular accident  
24 Cerebrovascular accident care plan  
25 Left sided cerebral hemisphere cerebrovascular accident  
26 Right sided cerebral hemisphere cerebrovascular accident  
27 Extension of cerebrovascular accident  
28 Cerebrovascular accident annual review  
29 Cerebrovascular accident due to stenosis of bilateral carotid arteries  
30 History of embolic cerebrovascular accident  
31 History of cerebrovascular accident due to ischaemia  
32 Cerebrovascular accident due to occlusion of bilateral pontine arteries  
33 Acute cerebrovascular accident due to stenosis of left carotid artery  
34 Acute cerebrovascular accident due to occlusion of left middle cerebral artery  
35 Acute cerebrovascular accident due to occlusion of right posterior cerebral artery  
36 Acute cerebrovascular accident due to occlusion of right middle cerebral artery  
37 Acute cerebrovascular accident due to occlusion of right carotid artery  
38 Acute cerebrovascular accident due to occlusion of left carotid artery  
39 Acute cerebrovascular accident of basal ganglia  
40 Acute cerebrovascular accident of brainstem  
41 Acute cerebrovascular accident due to stenosis of right carotid artery  
42 Acute cerebrovascular accident due to occlusion of right cerebellar artery  
43 Acute cerebrovascular accident due to ischaemia  
44 Acute cerebrovascular accident due to occlusion of left cerebellar artery  
45 Acute cerebrovascular accident due to embolism of right middle cerebral artery  
46 Acute cerebrovascular accident due to embolism of left middle cerebral artery  
47 Left sided CVA  
48 Right sided CVA  
49 H/O: CVA  
50 CVA annual review



1 CVA unspecified  
2 [RFC] CVA  
3 Thromboangiitis obliterans  
4 Atherosclerotic heart disease  
5 Cerebral atherosclerosis  
6 Acute obliterating bronchiolitis  
7 Endarterectomy of coronary artery  
8 Endarterectomy of aorta and patch repair of aorta  
9 Endarterectomy of aorta  
10 Carotid endarterectomy and patch  
11 Carotid endarterectomy  
12 Obliteration of aneurysm of cerebral artery  
13 Obliteration of aneurysm of circle of Willis  
14 Endarterectomy of subclavian artery  
15 Endarterectomy of brachial artery  
16 Endarterectomy of axillary artery  
17 Endarterectomy of renal artery  
18 Endarterectomy of coeliac artery  
19 Endarterectomy of superior mesenteric artery  
20 Endarterectomy of visceral branch of abdominal aorta NEC  
21 Femoral endarterectomy  
22 Endarterectomy of popliteal artery  
23 Uncomplicated arteriosclerotic dementia  
24 Arteriosclerotic dementia with delirium  
25 Arteriosclerotic dementia with paranoia  
26 Arteriosclerotic dementia with depression  
27 Arteriosclerotic dementia NOS  
28 Cardiovascular arteriosclerosis unspecified  
29 Extremity artery atheroma  
30 Extremity artery atheroma NOS  
31 Atheroma of artery  
32 Arteriosclerotic vascular disease NOS  
33 Thromboangiitis obliterans NOS  
34 [X]Atherosclerosis of other arteries  
35 Iliac endarterectomy and patch  
36 Endarterectomy of iliac artery  
37 Endarterectomy and patch repair of artery  
38 Endarterectomy and patch repair of common iliac artery  
39 Endarterectomy of common iliac artery  
40 Endarterectomy and repair  
41 Atherosclerotic renal artery stenosis  
42 ARAS - Atherosclerotic renal artery stenosis  
43 Arteriosclerotic dementia  
44 Renal artery atherosclerosis  
45 Atherogenic lipoprotein phenotype  
46 Arteriosclerotic heart disease  
47 Pulmonary thromboendarterectomy  
48 Precerebral atherosclerosis  
49 Atherosclerosis of aorta  
50 [X]Arteriosclerotic dementia  
51

1 Arteriosclerosis  
2 Atheroscleritic retinopathy  
3 Arteriosclerotic vascular disease  
4 Atherosclerotic cardiovascular disease  
5 Atherosclerotic retinopathy  
6 Coronary atherosclerosis  
7 Endarterectomy & patch rep visceral branch abdomin aorta NEC  
8 Endarterectomy & patch repair inferior mesenteric artery NEC  
9 Endarterectomy & patch repair superior mesenteric artery NEC  
10 Endarterectomy of axillary artery and patch repair of axillary artery  
11 Endarterectomy of brachial artery and patch repair of brachial artery  
12 Endarterectomy of carotid artery and patch repair of carotid artery  
13 Endarterectomy and patch repair of coeliac artery NEC  
14 Endarterectomy of femoral artery and patch repair of femoral artery  
15 Endarterectomy of iliac artery and patch repair of iliac artery  
16 Endarterectomy of popliteal artery and patch repair of popliteal artery  
17 Endarterectomy of subclavian artery and patch repair of subclavian artery  
18 Endarterectomy and patch repair of suprarenal artery NEC  
19 Endarterectomy of vertebral artery and patch repair of vertebral artery  
20 Endarterectomy  
21 Coronary endarterectomy  
22 Other endarterectomy  
23 Other endarterectomy NOS  
24 Thromboendarterectomy  
25 Cardiovasc. arteriosclerosis  
26 Cerebral arteriosclerosis  
27 Atherosclerosis of extremities  
28 Atherosclerosis NOS  
29 [RFC] Atherosclerosis of lower limbs  
30 Pleural cavity obliteration  
31 Other endarterectomy  
32 Carotid atherosclerosis  
33 Percutaneous endarterectomy  
34 Carotid endarterectomy  
35 Non-obstructive coronary atherosclerosis  
36 Endarterectomy of femoral artery  
37 Atherosclerotic fibrous plaque  
38 Arteriosclerosis  
39 Calcified atheromatous plaque  
40 Calcified atheroma  
41 Atherosclerosis  
42 Atheromatosis  
43 Obliterative bronchiolitis  
44 Atherosclerosis of renal artery  
45 Atheroma  
46 Atheromatous plaque  
47 Obliteration of mastoid cavity  
48 Non-oblitterative otosclerosis  
49 Cerebral arteriosclerosis  
50 CEA - Carotid endarterectomy

1  
2 Coronary artery atheroma  
3 Atherosclerosis aorta  
4 Subcortical arteriosclerotic encephalopathy  
5 Subcortical atherosclerotic dementia  
6 Calcific coronary arteriosclerosis  
7 Obliteration  
8  
9 Atherosclerotic occlusive disease  
10 Atherosclerotic ischaemic disease  
11 Atherosclerotic ischemic disease  
12 Atheromatous degeneration  
13 Percutaneous endarterectomy of coronary artery  
14 Endarterectomy of internal carotid artery  
15 Endarterectomy of common femoral artery  
16 CFA - Endarterectomy of the common femoral artery  
17 Aortoiliac atherosclerosis  
18 Percutaneous endovascular obliteration  
19 Percutaneous endarterectomy of superficial femoral artery  
20 Percutaneous endarterectomy of internal carotid artery  
21 Carotid artery atheroma  
22 Percutaneous rotational coronary endarterectomy  
23 Endarterectomy and angioplasty of lower limb artery  
24 Obliterative coronary artery disease  
25 Coronary arteriosclerosis due to radiation  
26 Recurrent coronary arteriosclerosis after percutaneous transluminal coronary angioplasty  
27 Coronary arteriosclerosis of coronary artery bypass graft  
28 Atherosclerosis artery  
29 Atherosclerosis of coronary artery  
30 Arteriosclerosis of coronary artery bypass graft of transplanted heart  
31 Non-obstructive atherosclerosis of coronary artery  
32 Atherosclerosis of autologous coronary artery bypass graft  
33 Atherosclerosis of bilateral carotid arteries  
34 Atherosclerosis of right carotid artery  
35 Unstable angina co-occurrent and due to coronary arteriosclerosis  
36 Bilateral lower limb atherosclerosis pain at rest co-occurrent and due to atherosclerosis  
37 Arteriosclerosis of autologous vein coronary artery bypass graft with angina  
38 Ulcer of heel due to atherosclerosis of artery of lower limb  
39 Ulcer of ankle due to atherosclerosis of artery of lower limb  
40 Retinopathy due to atherosclerosis  
41 Bilateral intermittent claudication of lower limbs due to atherosclerosis of nonbiological bypass graft  
42 Congenital aortic stenosis  
43 Rheumatic aortic stenosis  
44 Repair of subaortic stenosis  
45 Mitral and aortic stenosis  
46 Mitral stenosis and aortic insufficiency  
47 Mitral stenosis and aortic regurgitation  
48 Mitral stenosis and aortic incompetence  
49 Mitral incompetence and aortic stenosis  
50 Mitral regurgitation and aortic stenosis  
51 Mitral insufficiency and aortic stenosis  
52 Aortic stenosis, non-rheumatic

1 Aortic valve stenosis  
2 Aortic valve stenosis with insufficiency  
3 Subaortic stenosis  
4 Atresia and stenosis of aorta  
5 Atresia or stenosis of aorta NOS  
6 Preductal aortic stenosis  
7 Postductal aortic stenosis  
8 Stenosis of aortic arch  
9 Aortic valve stenosis  
10 Supravalvar aortic stenosis  
11 Repair of supra-aortic stenosis  
12 Congenital stenosis of aortic valve  
13 Congenital stenosis of ascending aorta  
14 RH. aortic stenosis + insuffic  
15 Stenosis of dialysis vascular access  
16 Calcific aortic stenosis - bicuspid valve  
17 Senile aortic stenosis  
18 Stenosis of thoracic aorta  
19 Vascular graft stenosis  
20 SVAS - Supravalvar aortic stenosis  
21 Isolated aortic stenosis  
22 Critical stenosis of aortic valve  
23 Family history of stenosis of aortic valve  
24 Repair of supravalvar aortic stenosis  
25 Cerebrovascular accident due to stenosis of bilateral carotid arteries  
26 Mild aortic valve stenosis  
27 Mild stenosis of aortic valve  
28 Moderate aortic valve stenosis  
29 Moderate stenosis of aortic valve  
30 Severe aortic valve stenosis  
31 Severe stenosis of aortic valve  
32 Acute cerebrovascular accident due to stenosis of left carotid artery  
33 Acute cerebrovascular accident due to stenosis of right carotid artery  
34 Heart valve stenosis  
35 Stricture of aorta  
36 Constrictive pericarditis  
37 Constrictive cardiomyopathy  
38 Constrictive pericarditis NOS  
39 Primary restrictive cardiomyopathy  
40 Aortic valve opening restricted  
41 Restrictive cardiomyopathy with endomyocardial fibrosis  
42 Restrictive cardiomyopathy  
43 Cerebrovascular disease  
44 Evacuation of intracerebral haematoma  
45 [X]Other vascular dementia  
46 [X]Vascular dementia, unspecified  
47 Cerebral degeneration due to cerebrovascular disease  
48 Subarachnoid haemorrhage from carotid siphon and bifurcation  
49 Subarachnoid haemorrhage from vertebral artery  
50 Subarachnoid haemorrhage NOS

1 Intracerebral haemorrhage, intraventricular  
 2 Intracerebral haemorrhage NOS  
 3 Other cerebrovascular disease  
 4 Generalised ischaemic cerebrovascular disease NOS  
 5 Other cerebrovascular disease OS  
 6 Other cerebrovascular disease NOS  
 7 Late effects of cerebrovascular disease  
 8 Sequelae of subarachnoid haemorrhage  
 9 Sequelae of intracerebral haemorrhage  
 10 Other specified cerebrovascular disease  
 11 Cerebrovascular disease NOS  
 12 [X]Subarachnoid haemorrhage from other intracranial arteries  
 13 [X]Other subarachnoid haemorrhage  
 14 [X]Other specified cerebrovascular diseases  
 15 [X]Intracerebral haemorrhage in hemisphere, unspecified  
 16 Intracerebral haematoma in fetus or newborn  
 17 Subarachnoid haemorrhage due to birth injury  
 18 Subarachnoid haemorrhage  
 19 Subarachnoid haemorrhage following injury with open intracranial wound, with no loss of consciousness  
 20 Subarachnoid haemorrh from intracranial artery, unspecif  
 21 Subarachnoid haemorrhage from basilar artery  
 22 Subarachnoid haemorrhage from middle cerebral artery  
 23 Subarachnoid haemorrhage from posterior communicating artery  
 24 Sequelae/other + unspecified cerebrovascular diseases  
 25 Right sided intracerebral haemorrhage, unspecified  
 26 Suspected cerebrovascular disease  
 27 [X]Cerebrovascular diseases  
 28 Mixed cortical and subcortical vascular dementia  
 29 [X]Multi-infarct dementia  
 30 [X]Other cerebrovascular disorders in diseases CE  
 31 [X]Other vascular syndroms/brain in cerebrovasculr diseases  
 32 [X]Sequelae/other + unspecified cerebrovascular diseases  
 33 Subcortical vascular dementia  
 34 Vascular dementia  
 35 Vascular dementia of acute onset  
 36 Family history of subarachnoid haemorrhage  
 37 Multi-infarct dementia  
 38 Intracerebral haemorrhage in hemisphere, unspecified  
 39 Intracerebral haemorrhage, multiple localized  
 40 Left sided intracerebral haemorrhage, unspecified  
 41 Diffuse cerebrovascular disease  
 42 H/O subarachnoid haemorrhage  
 43 [D] Vascular dementia  
 44 Small vessel cerebrovascular disease  
 45 At risk of cerebrovascular disease  
 46 High risk of cerebrovascular disease  
 47 Cerebrovascular disease monitoring in secondary care  
 48 Cerebrovascular disease monitoring default  
 49 Cerebrovascular disease management  
 50 Vascular dementia of acute onset, without additional symptoms

1 Vascular dementia of acute onset, other symptoms, predominantly delusional  
2 Vascular dementia of acute onset, other mixed symptoms  
3 Multi-infarct dementia, other symptoms, predominantly depressive  
4 Multi-infarct dementia, other mixed symptoms  
5 Subcortical vascular dementia, without additional symptoms  
6 Subcortical vascular dementia, other symptoms, predominantly delusional  
7 Subcortical vascular dementia, other symptoms, predominantly hallucinatory  
8 Subcortical vascular dementia, other mixed symptoms  
9 Mixed cortical and subcortical vascular dementia, without additional symptoms  
10 Mixed cortical and subcortical vascular dementia, other symptoms, predominantly delusional  
11 Mixed cortical and subcortical vascular dementia, other symptoms, predominantly hallucinatory  
12 Mixed cortical and subcortical vascular dementia, other symptoms, predominantly depressive  
13 Mixed cortical and subcortical vascular dementia, other mixed symptoms  
14 Other vascular dementia, without additional symptoms  
15 Other vascular dementia, other symptoms, predominantly delusional  
16 Other vascular dementia, other symptoms, predominantly hallucinatory  
17 Other vascular dementia, other symptoms, predominantly depressive  
18 Other vascular dementia, other mixed symptoms  
19 Vascular dementia, unspecified, without additional symptoms  
20 Vascular dementia, unspecified, other symptoms, predominantly hallucinatory  
21 Vascular dementia, unspecified, other mixed symptoms  
22 Vascular dementia, with delirium  
23 Predominantly cortical vascular dementia  
24 SAH - Subarachnoid haemorrhage  
25 Multi-infarct dementia with delusions  
26 MID - Multi-infarct dementia  
27 VAD - Vascular dementia  
28 CVD - Cerebrovascular disease  
29 Multi-infarct dementia, uncomplicated  
30 History of subarachnoid haemorrhage  
31 Intracerebral haemorrhage with intraventricular haemorrhage  
32 Intracerebral haemorrhage, multiple localised  
33 Sequelae of cerebrovascular disease  
34 Subarachnoid haemorrhage due to ruptured aneurysm  
35 Asymptomatic cerebrovascular disease  
36 Traumatic intracranial subarachnoid haemorrhage  
37 Traumatic cranial subarachnoid haemorrhage  
38 Subarachnoid haemorrhage from middle cerebral artery aneurysm  
39 Subarachnoid haemorrhage from anterior communicating artery aneurysm  
40 Subarachnoid haemorrhage from posterior communicating artery aneurysm  
41 Subarachnoid haemorrhage from basilar artery aneurysm  
42 Subarachnoid haemorrhage from posterior inferior cerebellar artery aneurysm  
43 Intracerebellar and posterior fossa haemorrhage  
44 Traumatic intracerebral haemorrhage  
45 Non-aneurysmal subarachnoid intracranial haemorrhage  
46 Traumatic subarachnoid haemorrhage without coma  
47 Ischaemic vascular dementia  
48 Vascular dementia with behavioural disturbance  
49 Vascular dementia with behavioral disturbance  
50 Nontraumatic intracerebral haemorrhage

1 FH: Subarachnoid haemorrhage  
2 Intracerebral haemorrhage  
3 MVAD - Mixed vascular Alzheimer dementia  
4 Subarachnoid haemorrhage due to traumatic injury  
5 Cerebral ischaemic stroke co-occurrent with subarachnoid haemorrhage  
6 Cortical vascular dementia  
7 Pulmonary embolism  
8 H/O: pulmonary embolus  
9 Trendelenburg pulmonary embolectomy  
10 Open embolisation of pulmonary artery  
11 Percutaneous transluminal embolisation of pulmonary artery  
12 Pulmonary embolism following abortive pregnancy  
13 Obstetric pulmonary embolism  
14 Obstetric pulmonary embolus  
15 Obstetric air pulmonary embolism  
16 Obstetric air pulmonary embolism - delivered  
17 Amniotic fluid pulmonary embolism unspecified  
18 Amniotic fluid pulmonary embolism - delivered  
19 Amniotic fluid pulmonary embolism NOS  
20 Obstetric blood-clot pulmonary embolism  
21 Obstetric blood-clot pulmonary embolism unspecified  
22 Obstetric blood-clot pulmonary embolism - delivered  
23 Obstetric blood-clot pulmonary embolism NOS  
24 Obstetric pyaemic and septic pulmonary embolism unspecified  
25 Obstetric pyaemic and septic pulmonary embolism NOS  
26 Other obstetric pulmonary embolism unspecified  
27 Other obstetric pulmonary embolism - delivered  
28 Other obstetric pulmonary embolism NOS  
29 Obstetric pulmonary embolism NOS  
30 Obstetric pulmonary embolism NOS, unspecified  
31 Obstetric pulmonary embolism NOS - delivered  
32 Obstetric pulmonary embolism NOS with antenatal complication  
33 Obstetric pulmonary embolism NOS with postnatal complication  
34 Thromboembolic pulmonary hypertension  
35 Obstetric pyaemic and septic pulmonary embolism  
36 Other obstetric pulmonary embolism  
37 [V] Personal history of pulmonary embolism  
38 Suspected pulmonary embolism  
39 Other obstetric pulmonary embolism - delivered + p/n comp  
40 Other obstetric pulmonary embolism with antenatal comp  
41 Pulmonary embolus  
42 Postoperative pulmonary embolus  
43 Percutaneous transluminal embolectomy of pulmonary artery  
44 Open pulmonary embolectomy  
45 Obstetric pulmonary embolism NOS  
46 Obstetric pulmonary embolism NOS - delivered with p/n comp  
47 Obstetric blood-clot pulmonary embolism - delivered with postnatal complication  
48 Obstetric blood-clot pulmonary embolism with antenatal complication  
49 Obstetric blood-clot pulmonary embolism with postnatal complication  
50 Obstetric air pulmonary embolism with a/n complication



1 Obstetric air pulmonary embolism with p/n complication  
2 Amniotic fluid pulmonary embolism - delivered with postnatal complication  
3 Amniotic fluid pulmonary embolism with antenatal complication  
4 Amniotic fluid pulmonary embolism with postnatal complication  
5 Recurrent pulmonary embolism  
6 Obstetrical pulmonary embolism  
7 [RFC] Pulmonary embolism/pulmonary hypertension  
8 Wells pulmonary embolus clinical probability score  
9 Percutaneous transluminal embolisation of major systemic to pulmonary collateral artery  
10 Thromboembolic pulmonary hypertension  
11 History of pulmonary embolus  
12 Percutaneous embolectomy of pulmonary artery  
13 Pulmonary thromboembolism  
14 Acute massive pulmonary embolism  
15 Subacute massive pulmonary embolism  
16 SAMPE - Subacute massive pulmonary embolism  
17 Pulmonary fat embolism  
18 Pulmonary tumour embolism  
19 Chronic thromboembolic pulmonary hypertension  
20 Pulmonary air embolism  
21 Embolisation of pulmonary artery  
22 Embolization of pulmonary artery  
23 Pulmonary embolus care  
24 Family history of pulmonary embolism  
25 Acute pulmonary embolism  
26 Chronic pulmonary thromboembolism  
27 Pulmonary embolism with pulmonary infarction  
28 Chronic pulmonary embolism  
29 Saddle embolus of pulmonary artery  
30 Diastolic dysfunction  
31 Diaphyseal dysplasia  
32 Diastrophic dysplasia  
33 Dysenteric diarrhoea  
34 Left ventricular systolic dysfunction  
35 Central nervous system dysfunction in newborn NOS  
36 Other cardiac dysrhythmias  
37 Cardiac dysrhythmia  
38 Lipodystrophy, partial, with Rieger anomaly, short stature, and insulinopenic diabetes mellitus  
39 Echocardiogram shows left ventricular systolic dysfunction  
40 No evidence of left ventricular diastolic dysfunction  
41 Right ventricular systolic dysfunction  
42 Right ventricular diastolic dysfunction  
43 Undiagnosed dyspepsia  
44 Central nervous system dysfunction in newborn NOS  
45 Dysfunction of vestibular system  
46 Diabetic erectile dysfunction review  
47 Assessment of diabetic erectile dysfunction  
48 Somatoform autonomic dysfunction, heart and cardiovascular system  
49 Somatoform autonomic dysfunction, respiratory system  
50 Somatoform autonomic dysfunction, genitourinary system



1 Severe left ventricular systolic dysfunction  
2 Median nail dystrophy of Heller  
3 Ischaemic myocardial dysfunction  
4 Chronic left ventricular systolic dysfunction  
5 Dysfunction of right cardiac ventricle  
6 Right ventricular cardiac dysfunction  
7 Asymptomatic left ventricular systolic dysfunction  
8 Dyslipidemia with high density lipoprotein below reference range and triglyceride above reference range due to  
9 Erectile dysfunction due to diabetes mellitus  
10 Atrial flutter  
11 Hypsarrhythmia  
12 Sinus arrhythmia  
13 ECG: supraventricular arrhythmia  
14 Supraventricular arrhythmia absent on electrocardiogram  
15 ECG: atrial flutter  
16 Electrocardiographic supraventricular arrhythmia  
17 ECG: ventricular arrhythmia  
18 ECG: no ventricular arrhythmia  
19 Self-help advice leaflet given  
20 Diabetic leaflet given  
21 Alcohol leaflet given  
22 Blood pressure leaflet given  
23 Arrhythmogenic right ventricular cardiomyopathy  
24 Cardiac arrhythmia  
25 Chronic obstructive pulmonary disease leaflet given  
26 Epilepsy leaflet given  
27 Contraception leaflet given  
28 History of atrial flutter  
29 Provision of smoking cessation leaflet  
30 Mental health information leaflet given  
31 Disease modifying antirheumatic drug information leaflet given  
32 Coeliac leaflet given  
33 Organ donation information leaflet given  
34 Toxic effect of aflatoxin  
35 Ventricular arrhythmia  
36 Posterior leaflet of mitral valve  
37 True cleft of mitral leaflet  
38 Operation on mitral leaflet  
39 Ablation operation for arrhythmia  
40 Diathermy ablation operation for arrhythmia  
41 Laser ablation operation for arrhythmia  
42 Radiofrequency ablation operation for arrhythmia  
43 Marked sinus arrhythmia  
44 True cleft of left atrioventricular valve leaflet  
45 Arrhythmogenic right ventricular dysplasia  
46 Arrhythmogenic right ventricular cardiomyopathy  
47 PTFE - Polytetrafluoroethylene  
48 Neonatal dysrhythmia  
49 Neonatal arrhythmia  
50 Mitral valve anterior leaflet prolapse

1 ECG automated dysrhythmia monitoring  
2 ECG: sinus arrhythmia  
3 Tricuspid leaflet thickened  
4 Cardiac arrhythmia physiologic monitoring system  
5 Provision of leaflet  
6 Giving self-help leaflet  
7 Downs syndrome antenatal screening information leaflet given  
8 Oedema information leaflet given  
9 ECG: myocardial infarction  
10 ECG: no myocardial infarction  
11 ECG: old myocardial infarction  
12 ECG: myocardial infarct NOS  
13 Acute anterior myocardial infarction  
14 Anterior myocardial infarction NOS  
15 Acute posterior myocardial infarction  
16 True posterior myocardial infarction  
17 Acute myocardial infarction of inferior wall  
18 Other acute myocardial infarction  
19 Other acute myocardial infarction NOS  
20 Acute myocardial infarction NOS  
21 Coronary thrombosis not resulting in myocardial infarction  
22 Subsequent myocardial infarction  
23 Subsequent myocardial infarction of anterior wall  
24 Subsequent myocardial infarction of inferior wall  
25 Subsequent myocardial infarction of other sites  
26 [X]Subsequent myocardial infarction of other sites  
27 [X]Subsequent myocardial infarction of unspecified site  
28 Silent myocardial infarction  
29 FH: Myocardial infarction  
30 H/O: Myocardial infarction in last year  
31 Postoperative subendocardial myocardial infarction  
32 Postoperative myocardial infarction, unspecified  
33 FH myocardial infarction male first degree age known  
34 FH myocardial infarction male first degree age unknown  
35 FH myocardial infarction female first degree age unknown  
36 [V]Observation for suspected myocardial infarction  
37 Family history of myocardial infarct in first degree female relative less than 65 years of age  
38 Thrombosis of atrium, auricular appendage, and ventricle as current complications following acute myocardial  
39 Subsequent myocardial infarction of unspecified site  
40 Rupture of cardiac wall without haemopericardium as current complication following acute myocardial infarct  
41 Rupture of chordae tendinae as current complication following acute myocardial infarction  
42 Rupture of papillary muscle as current complication following acute myocardial infarction  
43 Postoperative transmural myocardial infarction of anterior wall  
44 Postoperative transmural myocardial infarction of inferior wall  
45 Postoperative transmural myocardial infarction other sites  
46 Postoperative transmural myocardial infarction unspec site  
47 FH: Myocardial infarction < 60  
48 FH: Myocardial infarction at less than 60  
49 FH: Myocardial infarction > 60  
50 FH: Myocardial infarction at greater than 60

1  
2 Attack - heart  
3 MI - acute myocardial infarction  
4 Did not attend heart failure clinic  
5 [X]Other current complications following acute myocardial infarction  
6 Acute anterolateral myocardial infarction  
7 Acute transmural myocardial infarction of unspecified site  
8 Cardiac rupture after acute myocardial infarction  
9 Myocardial infarction with complication  
10 Child exam - heart: Attends Clinic  
11 Degeneration fatty heart  
12 Diabetes mellitus insulin-glucose infusion in acute myocardial infarction  
13 Fatty degeneration of heart  
14 Fatty infiltration heart  
15 Myocardial infarction aborted  
16 Haemopericardium as current complication following acute myocardial infarction  
17 Myocardial infarction  
18 [RFC] Myocardial infarction (MI)  
19 Acute myocardial infarction of posterolateral wall  
20 Cause of Death- Myocardial Infarction  
21 CHADS2 (congestive heart failure, hypertension, age 75 years or older, diabetes mellitus and previous stroke)  
22 Did not attend congenital heart disease clinic  
23 History of myocardial infarction  
24 Exception reporting - myocardial infarction quality indicators  
25 Myocardial infarction  
26 MI - Myocardial infarction  
27 Myocardial infarction  
28 Past myocardial infarction diagnosed on ECG AND/OR other special investigation, but currently presenting no :  
29 AMI - Acute myocardial infarction  
30 Acute myocardial infarction of lateral wall  
31 Acute myocardial infarction of apical-lateral wall  
32 Acute myocardial infarction of high lateral wall  
33 Acute myocardial infarction of inferolateral wall  
34 Postmyocardial infarction syndrome  
35 Acute myocardial infarction of anterolateral wall  
36 Acute inferior myocardial infarction  
37 Acute myocardial infarction of inferoposterior wall  
38 Aborted myocardial infarction  
39 Old anterior myocardial infarction  
40 Old inferior myocardial infarction  
41 Old lateral myocardial infarction  
42 Old posterior myocardial infarction  
43 MI - Silent myocardial infarction  
44 Family history: Myocardial infarction  
45 Family history: Myocardial infarction at greater than 60  
46 Anxiety about having a heart attack  
47 Normal fetal heart baseline pattern  
48 Acute Q wave myocardial infarction  
49 Non-Q wave myocardial infarction  
50 Congestive heart failure, hypertension, age 75 years or older, diabetes, and previous stroke or transient ischaemia  
51 History of non-ST segment elevation myocardial infarction

1 Acute anterior ST segment elevation myocardial infarction  
2 Acute STEMI (ST elevation myocardial infarction) of anterior wall  
3 Acute ST segment elevation myocardial infarction of anterior wall involving right ventricle  
4 Subsequent ST segment elevation myocardial infarction of inferior wall  
5 Acute ST segment elevation myocardial infarction of inferior wall  
6 Acute STEMI (ST elevation myocardial infarction) of inferior wall  
7 Acute inferior ST segment elevation myocardial infarction  
8 Acute ST segment elevation myocardial infarction of inferior wall involving right ventricle  
9 Mitral valve regurgitation due to acute myocardial infarction  
10 Subsequent non-ST segment elevation myocardial infarction  
11 Subsequent NSTEMI (non-ST segment elevation myocardial infarction)  
12 Inducible ischaemia manifest on stress test post myocardial infarction  
13 Acute myocardial infarction due to right coronary artery occlusion  
14 History of acute ST segment elevation myocardial infarction  
15 Acute ST segment elevation myocardial infarction involving left anterior descending coronary artery  
16 Family history of myocardial infarction in second degree relative less than 50 years  
17 Family history of myocardial infarction in first degree relative less than 60 years  
18 Thrombolysis In Myocardial Infarction risk score for unstable angina or non-ST-segment-elevation myocardial i  
19 Acute ST segment elevation myocardial infarction of anterolateral wall  
20 Acute ST segment elevation myocardial infarction of lateral wall  
21 Acute ST segment elevation myocardial infarction of anteroseptal wall  
22 Mural thrombus of left ventricle following acute myocardial infarction  
23 Assessment using CHADS2 (congestive heart failure, hypertension, age 75 years or older, diabetes mellitus and  
24 CHADS2 (congestive heart failure, hypertension, age 75 years or older, diabetes mellitus and previous stroke o  
25 Acute ST segment elevation myocardial infarction of inferolateral wall  
26 Acute ST segment elevation myocardial infarction of inferoposterior wall  
27 Delayed postmyocardial infarction pericarditis  
28 Acute myocardial infarction of right ventricle  
29 Acute STEMI (ST elevation myocardial infarction) due to proximal LAD (left anterior descending) coronary arte  
30 Acute ST segment elevation myocardial infarction due to mid left anterior descending coronary artery occlusio  
31 Acute STEMI (ST elevation myocardial infarction) due to mid LAD (left anterior descending) coronary artery oc  
32 Acute ST segment elevation myocardial infarction due to distal left anterior descending coronary artery occlus  
33 Acute STEMI (ST elevation myocardial infarction) due to distal LAD (left anterior descending) coronary artery o  
34 Acute ST segment elevation myocardial infarction due to occlusion of anterior descending branch of left coron  
35 Acute ST segment elevation myocardial infarction due to occlusion of intermediate artery  
36 Acute STEMI (ST elevation myocardial infarction) due to PDA (posterior descending artery) branch of RCA (righ  
37 Acute ST segment elevation myocardial infarction due to occlusion of posterior lateral branch of right coronar  
38 Myocardial infarction due to demand ischaemia  
39 Rupture of ventricle due to acute myocardial infarction  
40 Myocardial infarction with non-obstructive coronary artery  
41 MINOCA - myocardial infarction with non-obstructive coronary artery  
42 Acute myocardial infarction due to occlusion of circumflex branch of left coronary artery  
43 Acute STEMI (ST segment elevation myocardial infarction) of apex of heart  
44 MI - Mitral incompetence  
45 NSTEMI - Non-ST segment elevation MI  
46 Myocardial infarction with non-obstructive coronary artery  
47 MINOCA - myocardial infarction with non-obstructive coronary artery  
48 Acute myocardial infarction due to occlusion of circumflex branch of left coronary artery  
49 Acute STEMI (ST segment elevation myocardial infarction) of apex of heart  
50 MI - Mitral incompetence

1  
2 NSTEMI - Non-ST segment elevation MI  
3 Pulmonary arterial hypertension  
4 Benign hypertensive heart disease  
5 Malignant hypertensive heart disease  
6 Hypertensive heart disease  
7  
8 Benign hypertensive heart AND renal disease  
9 Malignant hypertensive heart AND renal disease  
10 Hypertensive heart AND renal disease  
11 Secondary pulmonary hypertension  
12 Malignant hypertensive heart disease NOS  
13 Benign hypertensive heart disease NOS  
14 Hypertensive heart disease NOS  
15 Hypertensive heart and renal disease with renal failure  
16 Hypertensive heart and renal disease NOS  
17 Thromboembolic pulmonary hypertension  
18 Cardiomegaly - hypertensive  
19 Benign hypertensive heart disease with congestive cardiac failure  
20 Malignant hypertensive heart disease with congestive cardiac failure  
21 Hypertensive heart disease NOS  
22 Hypertensive heart disease NOS with CCF  
23 Hypertensive heart disease NOS without CCF  
24 Hypertensive heart and renal disease with (congestive) heart failure  
25 Hypertensive heart and renal disease with both (congestive) heart failure and renal failure  
26 Hypertensive renal + heart dis  
27 [RFC] Pulmonary embolism/pulmonary hypertension  
28 Thromboembolic pulmonary hypertension  
29 Pulmonary arterial hypertension drugs Band 1  
30 Pulmonary arterial hypertension drugs Band 2  
31 Pulmonary arterial hypertension drugs Band 3  
32 Pulmonary arterial hypertension drugs Band 4  
33 Progressive pulmonary hypertension  
34 Hypertensive heart failure  
35 Hypertensive cardiopathy  
36 Pulmonary hypertension  
37 Chronic thromboembolic pulmonary hypertension  
38 Pulmonary hypertension with occult mitral stenosis  
39 Pulmonary hypertension secondary to raised pulmonary vascular resistance  
40 Right heart failure due to pulmonary hypertension  
41 Precapillary pulmonary hypertension  
42 Pulmonary arterial hypertension associated with connective tissue disease  
43 Mild pulmonary hypertension  
44 Moderate pulmonary hypertension  
45 Double outlet right ventricle with subpulmonary ventricular septal defect  
46 Atrial fibrillation  
47 Ventricular fibrillation  
48 H/O ventricular fibrillation  
49 ECG: atrial fibrillation  
50 ECG: ventricular fibrillation  
51 Atrial fibrillation and flutter  
52 Atrial fibrillation and flutter NOS

1 Ventricular fibrillation and flutter  
2 Ventricular fibrillation and flutter NOS  
3 Non-rheumatic atrial fibrillation  
4 Paroxysmal atrial fibrillation  
5 H/O: atrial fibrillation  
6 Implantation of internal cardiac defibrillator  
7 External ventricular defibrillation  
8 Chronic atrial fibrillation  
9 Cardioverter defibrillator introduced through the vein  
10 Replacement of cardioverter defibrillator  
11 Cardioverter defibrillator introduced through the vein NOS  
12 Persistent atrial fibrillation  
13 Permanent atrial fibrillation  
14 Implantation of intravenous pacemaker for atrial fibrillation  
15 Implantation of cardioverter defibrillator with one electrode lead  
16 Implantation of cardioverter defibrillator with two electrode leads  
17 Other specified cardioverter defibrillator intro thr vein  
18 Implantation of cardioverter defibrillator using three electrode leads  
19 Combination internal cardiac defibrillator and pacemaker in situ  
20 Atrial fibrillation confirmed  
21 Cardioverter defibrillator procedure  
22 Cardiac resynchronisation therapy defibrillator device in situ  
23 Implantation of subcutaneous cardioverter defibrillator  
24 Renewal of subcutaneous cardioverter defibrillator  
25 Defibrillator  
26 Defibrillator, device  
27 Revision of automatic implantable cardioverter/defibrillator  
28 AF - Atrial fibrillation  
29 Implantable defibrillator  
30 Implantable defibrillator, device  
31 Automatic defibrillator procedure  
32 ICD - Internal cardiac defibrillator procedure  
33 Implantation of automatic cardiac defibrillator  
34 Lone atrial fibrillation  
35 AF - Paroxysmal atrial fibrillation  
36 PAF - Paroxysmal atrial fibrillation  
37 Intermittent atrial fibrillation  
38 Controlled atrial fibrillation  
39 History of atrial fibrillation  
40 Rapid atrial fibrillation  
41 Transient cerebral ischaemia due to atrial fibrillation  
42 History of combination internal cardiac defibrillator and pacemaker  
43 Insertion of cardiac defibrillator using fluoroscopic guidance  
44 Insertion of cardiac biventricular implantable cardioverter defibrillator (ICD) using fluoroscopic guidance  
45 Cardiac defibrillator in situ  
46 Implantation of cardioverter defibrillator with three electrode leads  
47 Automatic implantable cardiac defibrillator in situ  
48 Insertion of single chamber pacing cardioverter defibrillator pulse generator  
49 Insertion of biventricular implantable cardioverter defibrillator  
50 Insertion of pacemaker for control of atrial fibrillation

1 Single-chamber implantable defibrillator  
2 Dual-chamber implantable defibrillator  
3 Cardiac resynchronisation therapy implantable defibrillator  
4 Cardiac resynchronization therapy implantable defibrillator  
5 Longstanding persistent atrial fibrillation  
6 Familial atrial fibrillation  
7 Biventricular automatic implantable cardioverter defibrillator in situ  
8 Atrial fibrillation with rapid ventricular response  
9 Replacement of subcutaneous cardioverter defibrillator  
10 Atrial fibrillation detected  
11 Paroxysmal atrial fibrillation with rapid ventricular response  
12 Replace aneurys fem art by fem/peron a anast c vein graf NEC  
13 Replace aneurys pop art by pop/peron a anast c vein graf NEC  
14 Portal vein thrombosis  
15 Hepatic vein thrombosis  
16 Thromboangiitis obliterans  
17 Pulmonary embolism  
18 Cerebral thrombosis  
19 Thrombotic thrombocytopenic purpura  
20 Thrombotic microangiopathy  
21 Renal artery thrombosis  
22 Deep vein thrombosis of leg related to air travel  
23 H/O: Deep Vein Thrombosis  
24 Phlebitis and thrombophlebitis of intracranial sinuses  
25 Thrombosis of superior longitudinal sinus  
26 Thrombosis transverse sinus  
27 Thrombosis of central nervous system venous sinus NOS  
28 Thrombophlebitis of central nervous system venous sinuses  
29 Thrombophlebitis of cavernous sinus  
30 Thrombophlebitis of superior longitudinal venous sinus  
31 Thrombophlebitis lateral venous sinus  
32 Thrombophlebitis of central nervous system venous sinus NOS  
33 Myelopathy due to arterial thrombosis of spinal cord  
34 Coronary thrombosis not resulting in myocardial infarction  
35 Atrial thrombosis  
36 Cerebral infarct due to thrombosis of precerebral arteries  
37 Cerebral infarction due to thrombosis of cerebral arteries  
38 Thromboangiitis obliterans NOS  
39 Embolism and thrombosis of the thoracic aorta  
40 Embolism and thrombosis of an arm or leg artery  
41 Embolism and thrombosis of the brachial artery  
42 Embolism and thrombosis of the radial artery  
43 Embolism and thrombosis of the ulnar artery  
44 Embolism and thrombosis of an arm artery NOS  
45 Embolism and thrombosis of the femoral artery  
46 Embolism and thrombosis of the popliteal artery  
47 Embolism and thrombosis of the anterior tibial artery  
48 Embolism and thrombosis of the dorsalis pedis artery  
49 Embolism and thrombosis of the posterior tibial artery  
50 Embolism and thrombosis of a leg artery NOS



1 Peripheral arterial embolism and thrombosis NOS  
2 Embolism and thrombosis of other specified artery  
3 Embolism and/or thrombosis of the common iliac artery  
4 Embolism and/or thrombosis of the internal iliac artery  
5 Embolism and/or thrombosis of the external iliac artery  
6 Embolism and thrombosis of the iliac artery unspecified  
7 Embolism and thrombosis of the subclavian artery  
8 Embolism and thrombosis of the splenic artery  
9 Embolism and thrombosis of the axillary artery  
10 Embolism and thrombosis of the coeliac artery  
11 Embolism and thrombosis of the hepatic artery  
12 Embolism and thrombosis of other arteries NOS  
13 Arterial embolism and thrombosis NOS  
14 Thrombophlebitis of the femoral vein  
15 Thrombophlebitis of the popliteal vein  
16 Thrombophlebitis of the anterior tibial vein  
17 Thrombophlebitis of the posterior tibial vein  
18 Thrombophlebitis of deep veins of lower extremity  
19 Deep vein phlebitis and thrombophlebitis of the leg NOS  
20 Thrombophlebitis of the common iliac vein  
21 Thrombophlebitis of the internal iliac vein  
22 Thrombophlebitis of the external iliac vein  
23 Thrombophlebitis of iliac vein  
24 Phlebitis and thrombophlebitis of the iliac vein NOS  
25 Thromboembolism of vein  
26 Embolism and thrombosis of the vena cava  
27 Embolism and thrombosis of the renal vein  
28 Other embolism and thrombosis  
29 Embolism and thrombosis NOS  
30 [X]Embolism and thrombosis of other arteries  
31 Thrombosis of mesenteric vein  
32 Scrotal thrombosis  
33 Male genital thrombosis NOS  
34 Pulmonary embolism following abortive pregnancy  
35 Antenatal deep vein thrombosis unspecified  
36 Antenatal deep vein thrombosis - delivered  
37 Antenatal deep vein thrombosis with antenatal complication  
38 Antenatal deep vein thrombosis NOS  
39 Postnatal deep vein thrombosis unspecified  
40 Postnatal deep vein thrombosis with postnatal complication  
41 Postnatal deep vein thrombosis NOS  
42 Obstetric cerebral venous thrombosis  
43 Cerebral venous thrombosis in pregnancy  
44 Cerebral venous thrombosis in the puerperium  
45 Obstetric pulmonary embolism  
46 Obstetric blood-clot pulmonary embolism  
47 Obstetric blood-clot pulmonary embolism unspecified  
48 Obstetric blood-clot pulmonary embolism - delivered  
49 Obstetric blood-clot pulmonary embolism NOS  
50 Other obstetric pulmonary embolism unspecified



1  
2 Other obstetric pulmonary embolism - delivered  
3 Other obstetric pulmonary embolism NOS  
4 Obstetric pulmonary embolism NOS  
5 Obstetric pulmonary embolism NOS, unspecified  
6 Obstetric pulmonary embolism NOS - delivered  
7  
8 Obstetric pulmonary embolism NOS with antenatal complication  
9 Obstetric pulmonary embolism NOS with postnatal complication  
10 Thromboembolism after infusion  
11 Anterior spinal artery thrombosis  
12 Arteriovenous fistula thrombosis  
13 Arterial embolic and thrombotic occlusion  
14 Arterial embolus and thrombosis  
15 Embolism and thrombosis of the abdominal aorta  
16 Deep vein phlebitis and thrombophlebitis of the leg  
17 Venous thrombosis  
18 Other obstetric pulmonary embolism  
19 H/O: thrombosis  
20 Phlebitis and/or thrombophlebitis of iliac vein  
21 Thrombosis of inferior vena cava  
22 Axillary vein thrombosis  
23 Thrombosis of renal artery bypass graft  
24 H/O: Deep vein thrombosis  
25 [V] Personal history of pulmonary embolism  
26 Right ventricular thrombosis  
27 Thrombosis of vein of leg  
28 Retinal vein thrombosis  
29 Antenatal deep vein thrombosis  
30 Postnatal deep vein thrombosis  
31 DVT - deep venous thrombosis, postnatal  
32 Penis vein thrombosis  
33 [V] Personal history DVT (deep vein thrombosis)  
34 Mural thrombosis  
35 Cerebral vein thrombosis  
36 Coronary thrombosis  
37 Thrombosis - coronary  
38 Deep vein thrombosis  
39 Deep venous thrombosis  
40 Deep vein thrombosis of lower limb  
41 Deep vein thrombosis of leg related to intravenous drug use  
42 Pulmonary thromboendarterectomy  
43 Percutaneous transluminal thrombolysis of artery  
44 Transjugular intrahepatic thrombolysis of portal vein  
45 Thrombosis of subclavian vein  
46 Right middle cerebral artery thrombosis  
47 Thrombosis of right vertebral artery  
48 Thrombosis of right middle cerebral artery  
49 Thrombosis of left middle cerebral artery  
50 Iliac vein thrombosis  
51 Thrombosis of iliac vein  
52 Other phlebitis and thrombosis in pregnancy and puerperium  
53  
54  
55  
56  
57  
58  
59  
60

1 Other phlebitis/thrombosis in preg/puerperium + a/n comp  
2 Other phlebitis/thrombosis in preg/puerperium + p/n comp  
3 Other phlebitis/thrombosis in preg/puerperium -del +p/n comp  
4 Other phlebitis/thrombosis in pregnancy and puerperium NOS  
5 Other phlebitis/thrombosis in pregnancy/puerperium - deliv  
6 Other phlebitis/thrombosis in pregnancy/puerperium unsp  
7 Other obstetric pulmonary embolism - delivered + p/n comp  
8 Other obstetric pulmonary embolism with antenatal comp  
9 Other obstetric pulmonary embolism with postnatal comp  
10 Thrombosis of atrium, auricular appendage, and ventricle as current complications following acute myocardial  
11 Cerebral venous thrombosis of cavernous sinus  
12 Thrombosis lateral sinus  
13 Cerebral venous sinus thrombosis  
14 Carotid artery thrombosis  
15 Superior mesenteric artery thrombosis  
16 Superior mesenteric vein thrombosis  
17 Puerperal thrombosis NOS  
18 Postnatal deep vein thrombosis - delivered with postnatal complication  
19 Mesenteric thrombosis  
20 Postoperative deep vein thrombosis  
21 H/O: thromboembolism  
22 Arterial thrombosis  
23 Deep vein thrombosis, leg  
24 Phlebitis or thrombophlebitis of CNS venous sinus NOS  
25 Percutaneous transluminal coronary thrombolytic using streptokinase  
26 Percutaneous transluminal thrombolysis of femoral graft using streptokinase  
27 Percutaneous transluminal coronary thrombolysis using streptokinase  
28 Obstetric pulmonary embolism NOS  
29 Obstetric pulmonary embolism NOS - delivered with p/n comp  
30 Obstetric blood-clot pulmonary embolism - delivered with postnatal complication  
31 Obstetric blood-clot pulmonary embolism with antenatal complication  
32 Obstetric blood-clot pulmonary embolism with postnatal complication  
33 Percutaneous transluminal venous thrombolysis NEC  
34 Percutaneous mechanical thromboembolectomy  
35 Percutaneous aspiration thromboembolectomy  
36 [X]Phlebitis+thrombophlebitis/oth deep vessls/low extremities  
37 Arterial embolism and thrombosis  
38 Cerebral infarction due to cerebral venous thrombosis, non-pyogenic  
39 Non-pyogenic venous sinus thrombosis  
40 Recurrent pulmonary embolism  
41 Antenatal DVT  
42 Embolism and thrombosis NOS  
43 Embolism and thrombosis of other and unspec parts aorta  
44 Gestational thrombosis NOS  
45 Axillary vein thrombosis  
46 Thromboendarterectomy  
47 Coronary thrombosis  
48 Arterial embolism/thrombosis  
49 Embolus/thrombosis abd. aorta  
50 Embolus/thrombosis aorta NOS

1  
2 Deep venous thrombosis - leg  
3 Venous thrombosis NOS  
4 Antepartum DVT  
5 Postpartum DVT  
6 Obstetrical pulmonary embolism  
7 [RFC] Venous thrombosis  
8 [RFC] Deep vein thrombosis  
9 Deep venous thrombosis - leg  
10 Deep vein thrombosis of peroneal vein  
11 Percutaneous transluminal thrombolysis of blood vessel of liver  
12 Percutaneous transluminal thrombolysis and reconstruction of artery  
13 Percutaneous transluminal venous thrombolysis with reconstruction  
14 Cerebral venous thrombosis  
15 Recurrent deep vein thrombosis  
16 Thrombosis of stent of renal artery  
17 Recurrent deep vein thrombosis  
18 Postthrombotic syndrome  
19 Thrombosis of dialysis vascular access  
20 Thrombosis of internal jugular vein  
21 Thrombosis of external jugular vein  
22 Thrombosis of artery of transplanted kidney  
23 Thrombosis of dialysis arteriovenous graft  
24 Thrombosis of dialysis arteriovenous fistula  
25 Thrombosis of dialysis arteriovenous shunt  
26 Unprovoked deep vein thrombosis  
27 Provoked deep vein thrombosis  
28 Perianal venous thrombosis  
29 Splenic vein thrombosis  
30 Renal vein thrombosis  
31 Deep thrombophlebitis  
32 Deep vein thrombosis of portal vein  
33 PVT - Portal vein thrombosis  
34 Thrombosis of lateral venous sinus  
35 Cerebral venous thrombosis of lateral sinus  
36 Thrombosed varices  
37 Branch retinal vein thrombosis  
38 Hepatic vein thrombosis  
39 Thrombosis of corpus cavernosum  
40 Thrombosis of retinal vein  
41 Antepartum deep vein thrombosis  
42 Thrombolysis  
43 Femoral artery thrombosis  
44 Postpartum deep phlebothrombosis  
45 Postpartum deep vein thrombosis  
46 Pulmonary artery thrombosis  
47 Pulmonary arterial thrombosis  
48 PE - Pulmonary embolism  
49 Vertebral artery thrombosis  
50 CRVT - Central retinal vein thrombosis  
51 Thrombosis of superior sagittal sinus

1 Sagittal sinus thrombosis  
2 Thrombosis of penile vein  
3 Thrombotic infarction  
4 Pulmonary vein thrombosis  
5 Hepatic artery thrombosis  
6 Thrombosis of abdominal aorta  
7 Popliteal artery thrombosis  
8 Basilar artery thrombosis  
9 Thrombosis of cavernous venous sinus  
10 Thrombosis of arteries of lower extremity  
11 Thrombosis of pelvic vein  
12 Thrombosis of cerebral veins  
13 Cerebral venous thrombosis  
14 Thrombosis of renal artery  
15 Thrombosed aneurysm  
16 DVT - Deep vein thrombosis  
17 History of deep vein thrombosis  
18 Deep venous thrombosis of the superior mesenteric vein  
19 Cerebral venous thrombosis of sigmoid sinus  
20 Cerebral venous thrombosis of cortical vein  
21 Thrombolysis of intracranial vessel  
22 Percutaneous thrombolysis of intracranial artery  
23 Thrombolysis of artery  
24 Percutaneous thrombolysis of common femoral artery  
25 Thrombolysis of vein  
26 Thrombolysis of arteriovenous fistula  
27 Pulmonary thromboembolism  
28 Acute massive pulmonary embolism  
29 Subacute massive pulmonary embolism  
30 SAMPE - Subacute massive pulmonary embolism  
31 Inferior mesenteric vein thrombosis  
32 Thrombosis of vein of lower leg  
33 Iliofemoral deep vein thrombosis  
34 Iliofemoral deep vein thrombosis  
35 Blood clot in eye  
36 Thrombosis  
37 Aortic thromboembolism  
38 Percutaneous thrombolysis of artery  
39 Percutaneous thrombolysis of vein  
40 Brachiocephalic vein thrombosis  
41 Subclavian artery thrombosis  
42 Intracranial venous thrombosis  
43 Digital arterial thrombosis  
44 Septic thrombophlebitis of sagittal sinus  
45 Thrombosis of vein of lower limb  
46 Thrombosis of vein of trunk  
47 Venous thrombosis, phlebitis and thrombophlebitis  
48 Thromboembolic disorder  
49 Thromboembolism  
50 Thromboembolic disease

1  
2 Thrombotic stroke  
3 Coronary artery thrombosis  
4 CT - Coronary thrombosis  
5 Deep venous thrombosis of lower extremity  
6 DVT - Deep vein thrombosis of lower limb  
7  
8 Deep venous thrombosis of leg  
9 Deep venous thrombosis of lower limb  
10 Thrombosis of ulnar artery  
11 Deep venous thrombosis of deep femoral vein  
12 Thrombosis of the popliteal vein  
13 Deep venous thrombosis of the popliteal vein  
14 History of thromboembolism of vein  
15 Venous thromboembolic disease  
16 Thrombosis  
17  
18 Deep venous thrombosis of peroneal vein  
19 Thrombosis of middle cerebral artery  
20 Cerebral infarction due to thrombosis of middle cerebral artery  
21 Acute pulmonary embolism  
22 Chronic pulmonary thromboembolism  
23 Pulmonary embolism on long-term anticoagulation therapy  
24 Acute occlusion of artery of lower limb co-occurrent and due to thromboembolus  
25 Acute deep vein thrombosis of lower limb  
26 Pulmonary embolism with pulmonary infarction  
27 Acute deep venous thrombosis  
28 Acute deep venous thrombosis of femoral vein  
29 Acute deep venous thrombosis of ileofemoral vein  
30 Chronic pulmonary embolism  
31 Acute deep venous thrombosis of internal jugular vein  
32 History of recurrent deep vein thrombosis  
33 Unprovoked DVT (deep vein thrombosis)  
34 Provoked DVT (deep vein thrombosis)  
35 Thrombosis of arm  
36 LVAD (left ventricular assist device) thrombosis  
37 Chronic deep vein thrombosis of left iliac vein  
38 Acute deep vein thrombosis of left iliac vein  
39 Acute thrombosis of superficial vein of bilateral upper limbs  
40 Right iliac artery thrombosis  
41 Splenic artery thrombosis  
42 Left common femoral artery thrombosis  
43 Thrombophlebitis of right jugular vein  
44 Chronic venous thrombosis  
45 Deep vein thrombosis of lower extremity due to intravenous drug use  
46 Thromboembolus of artery of upper limb  
47 Thromboembolus of artery of lower limb  
48 Acute DVT (deep vein thrombosis) of left peroneal vein  
49 Acute DVT (deep vein thrombosis) of right peroneal vein  
50 Valvular heart disease  
51 Congenital heart disease  
52 Rheumatic heart disease  
53 Atherosclerotic heart disease  
54  
55  
56  
57  
58  
59  
60

1 Thyrotoxic heart disease  
2 Cerebrovascular disease  
3 Acute pulmonary heart disease  
4 Chronic rheumatic heart disease  
5 Chronic pulmonary heart disease  
6 H/O: heart disease NOS  
7 ECG: myocardial ischaemia NOS  
8 Polycythaemia due to cyanotic heart disease  
9 Cerebral degeneration due to cerebrovascular disease  
10 Other acute rheumatic heart disease  
11 Other acute rheumatic heart disease NOS  
12 Acute rheumatic heart disease  
13 Other specified chronic rheumatic heart disease  
14 Other and unspecified rheumatic heart disease  
15 Rheumatic heart disease unspecified  
16 Other rheumatic heart disease NOS  
17 Chronic rheumatic heart disease NOS  
18 Other acute and subacute ischaemic heart disease  
19 Other acute and subacute ischaemic heart disease NOS  
20 Chronic ischaemic heart disease  
21 Other specified chronic ischaemic heart disease  
22 Other specified chronic ischaemic heart disease NOS  
23 Other chronic ischaemic heart disease NOS  
24 Other specified ischaemic heart disease  
25 Ischaemic heart disease NOS  
26 Acute pulmonary heart disease NOS  
27 Other chronic pulmonary heart disease  
28 Other chronic pulmonary heart disease NOS  
29 Other cerebrovascular disease  
30 Generalised ischaemic cerebrovascular disease NOS  
31 Other cerebrovascular disease OS  
32 Other cerebrovascular disease NOS  
33 Late effects of cerebrovascular disease  
34 Other specified cerebrovascular disease  
35 Cerebrovascular disease NOS  
36 Arteriosclerotic vascular disease NOS  
37 Other specified peripheral vascular disease  
38 Other specified peripheral vascular disease NOS  
39 Peripheral vascular disease NOS  
40 [X]Other acute rheumatic heart disease  
41 [X]Other specified rheumatic heart diseases  
42 [X]Other forms of acute ischaemic heart disease  
43 [X]Other forms of chronic ischaemic heart disease  
44 [X]Other specified pulmonary heart diseases  
45 Heart disease  
46 [X]Cardiovascular disease, unspecified  
47 [X]Other specified cerebrovascular diseases  
48 [X]Other specified peripheral vascular diseases  
49 Male genital organ vascular diseases  
50 Male genital vascular diseases NOS

1  
2 Acyanotic congenital heart disease NOS  
3 Peripheral ischaemic vascular disease  
4 Heart disease during pregnancy  
5 Congenital heart disease in pregnancy  
6 Congenital heart disease, septal and bulbar anomalies  
7  
8 Chronic pulmonary heart disease NOS  
9 Other peripheral vascular disease  
10 H/O: cardiovascular disease  
11 Cyanotic congenital heart disease  
12 Aspirin prophylaxis for ischaemic heart disease  
13 H/O: cerebrovascular disease  
14 H/O: Treatment for ischaemic heart disease  
15 H/O: Peripheral vascular disease procedure  
16 Transient myocardial ischaemia  
17 Asymptomatic coronary heart disease  
18 Renal vascular disease  
19 Ischaemic heart disease  
20 Chronic myocardial ischaemia  
21 Arteriosclerotic heart disease  
22 IHD - Ischaemic heart disease  
23 Congestive heart failure due to valvular disease  
24 Other acute and subacute ischaemic heart disease  
25 On Warfarin and aspirin - IHD prophylaxis  
26 Sequelae/other + unspecified cerebrovascular diseases  
27 Sarcoid heart disease  
28 Heart diseases  
29 Peripheral vascular disease  
30 [X]Cerebrovascular diseases  
31 [X]Chronic rheumatic heart disease  
32 [X]Ischaemic heart diseases  
33 [X]Other cerebrovascular disorders in diseases CE  
34 [X]Other heart disorders in other diseases CE  
35 [X]Other vascular syndroms/brain in cerebrovasculr diseases  
36 [X]Pulmon heart disease & diseases of pulmonary circulation  
37 [X]Sequelae/other + unspecified cerebrovascular diseases  
38 Amyloid heart muscle disease  
39 Arteriosclerotic vascular disease  
40 Atherosclerotic cardiovascular disease  
41 Emergency hospital admission for ischaemic heart disease  
42 ECG myocardial ischaemia  
43 ECG:shows myocardial ischaemia  
44 Diffuse cerebrovascular disease  
45 Heart disease - pulmonary  
46 Acute RH. heart disease NOS  
47 Chronic rheumatic heart diseas  
48 Rheumatic heart disease NOS  
49 Acute/subacute IHD NOS  
50 Pulmonary heart disease  
51 Pulmonary heart disease NOS  
52 Other pulmonary heart disease

1  
2 Peripheral vasc. disease NOS  
3 Peripheral vasc. disease NOS  
4 [RFC] Chronic heart disease (CHD)  
5 [RFC] Congenital heart disease  
6 [RFC] Peripheral vascular disease  
7 [RFC] Coronary heart disease  
8 Mental retardation, congenital heart disease, blepharophimosis, blepharoptosis and hypoplastic teeth  
9  
10 Rheumatic heart disease NOS  
11 Small vessel cerebrovascular disease  
12 H/O: coronary heart disease  
13 Coronary heart disease confirmed  
14 On coronary heart disease register  
15 Coronary microvascular disease  
16 Heart valve disease  
17 CHD - Congenital heart disease  
18 Vascular disease  
19 Cardiovascular renal disease  
20 Congestive heart disease  
21 Coloboma, congenital heart disease, choanal atresia, growth retardation, genital hypoplasia, ear and hearing a  
22 Cardiovascular disease  
23 CVD - cardiovascular disease  
24 CAD - Coronary artery disease  
25 CHD - Coronary heart disease  
26 Coronary heart disease  
27 CVD - Cerebrovascular disease  
28 Ischaemic heart disease - angina  
29 Sarcoid heart muscle disease  
30 Sequelae of cerebrovascular disease  
31 Asymptomatic cerebrovascular disease  
32 Peripheral ischemic vascular disease  
33 History of cardiovascular disease  
34 History of treatment for ischaemic heart disease  
35 PVD-peripheral vascular disease  
36 Acute ischaemic heart disease  
37 Acute myocardial ischaemia  
38 Chronic ischemic heart disease  
39 Ischemic heart disease  
40 IHD - Ischemic heart disease  
41 Myocardial ischaemia  
42 Mixed myocardial ischaemia and infarction  
43 Heart failure due to end stage congenital heart disease  
44 History of peripheral vascular disease  
45 Heart failure with reduced ejection fraction due to coronary artery disease  
46 Heart failure with reduced ejection fraction due to heart valve disease  
47 Subacute ischaemic heart disease  
48 Peripheral vascular disease associated with another disorder  
49 Visual disturbance as sequela of cerebrovascular disease  
50 Intellectual disability, congenital heart disease, blepharophimosis, blepharoptosis and hypoplastic teeth  
51 Peripheral arterial vascular disease  
52 Myocardial infarction due to demand ischaemia



1  
2 Pulmonary heart disease  
3 Congenital heart disease  
4 Congenital cardiospasm  
5 Congenital heart block  
6 Congenital cardiomegaly  
7 Congenital heart block, unspecified  
8 Congenital heart block NOS  
9 Congenital anomaly of myocardium  
10 Congenital aneurysm of heart  
11 Congenital epicardial cyst  
12 Congenital anomaly of heart valve  
13 Acyanotic congenital heart disease NOS  
14 Congenital heart anomaly NOS  
15 [X]Other congenital malformations of cardiac septa  
16 [X]Other specified congenital malformations of the heart  
17 Congenital cardiac failure  
18 Congenital heart disease in pregnancy  
19 Congenital insufficiency of heart valve NEC  
20 Congenital heart disease, septal and bulbar anomalies  
21 Congenital absence of pericardium  
22 Cyanotic congenital heart disease  
23 Congenital anomaly of cardiovascular system  
24 Congenital conductive hearing loss  
25 [X]Congenital malforms of cardiac chambers+connections unsp  
26 Congenital cardiovasc dis - unsp whether in preg/puerperium  
27 Congenital cardiovascular disorder during pregnancy - baby delivered  
28 Congenital cardiovascular disorder during pregnancy - baby not yet delivered  
29 Congenital cardiovascular disorder in the puerperium - baby delivered during current episode of care  
30 Congenital cardiovascular disorder in the puerperium - baby delivered during previous episode of care  
31 Congenital cardiovascular disorder in preg/childb/puerp NOS  
32 Congenital cardiovascular disorders during pregnancy, childbirth and the puerperium  
33 Congenital complete atrioventricular heart block  
34 Congenital heart anomaly NOS  
35 Congenital incomplete atrio-ventricular heart block  
36 Congenital malforms of cardiac chambers+connections unsp  
37 Congenital dextroposition of heart  
38 [RFC] Chronic heart disease (CHD)  
39 [RFC] Congenital heart disease  
40 Mental retardation, congenital heart disease, blepharophimosis, blepharoptosis and hypoplastic teeth  
41 Percutaneous transluminal ablation of congenital heart malformation  
42 Congenital anomaly of heart  
43 CHD - Congenital heart disease  
44 Coloboma, congenital heart disease, choanal atresia, growth retardation, genital hypoplasia, ear and hearing a  
45 Congenital atresia of cardiac vein  
46 Congenital malposition of cardiac apex  
47 CHD - Coronary heart disease  
48 Congenital incomplete atrioventricular heart block  
49 Congenital abnormality of cardiac connection  
50 Heart failure due to end stage congenital heart disease  
51 Congenital anomaly of cardiac chamber  
52

1 Intellectual disability, congenital heart disease, blepharophimosis, blepharoptosis and hypoplastic teeth  
2 Acute congestive heart failure  
3 Congestive heart failure  
4 Acute heart failure  
5 Heart failure  
6 Cardiac failure  
7 Chronic congestive heart failure  
8 Right heart failure  
9 H/O: heart failure  
10 Hypertensive heart and renal disease with renal failure  
11 Decompensated cardiac failure  
12 Compensated cardiac failure  
13 Post cardiac operation heart failure NOS  
14 Cardiac failure following abortive pregnancy  
15 Cardiorespiratory failure  
16 Heart transplant failure and rejection  
17 Heart-lung transplant failure and rejection  
18 Cardiorespiratory failure as a complication of care  
19 Heart failure as a complication of care  
20 Heart failure NOS  
21 Neonatal cardiac failure  
22 Cardiac failure therapy  
23 H/O: Heart failure in last year  
24 Congestive cardiac failure  
25 Biventricular congestive heart failure  
26 Heart failure confirmed  
27 Emergency hospital admission for heart failure  
28 Congestive heart failure due to valvular disease  
29 Cardiac failure NOS  
30 Benign hypertensive heart disease with congestive cardiac failure  
31 Benign hypertensive heart disease without CCF  
32 Malignant hypertensive heart disease with congestive cardiac failure  
33 Malignant hypertensive heart disease without congestive heart failure  
34 Hypertensive heart disease NOS with CCF  
35 Hypertensive heart disease NOS without CCF  
36 Hypertensive heart and renal disease with (congestive) heart failure  
37 Hypertensive heart and renal disease with both (congestive) heart failure and renal failure  
38 [RFC] Cardiac failure  
39 Heart failure with normal ejection fraction  
40 HFNEF - heart failure with normal ejection fraction  
41 Emergency heart failure admission since last appointment  
42 Heart failure with preserved ejection fraction  
43 On optimal heart failure therapy  
44 Acute left heart failure  
45 Chronic left-sided congestive heart failure  
46 High output heart failure  
47 Chronic right-sided heart failure  
48 Congestive cardiac failure  
49 CCF - Congestive cardiac failure  
50 CHF - Congestive heart failure

1  
2 Right heart failure secondary to left heart failure  
3 Hypertensive heart failure  
4 Chronic heart failure  
5 Hypertensive heart disease without congestive heart failure  
6 Chronic right-sided congestive heart failure  
7 HF - Heart failure  
8 Left heart failure  
9 Left-sided heart failure  
10 Chronic left-sided heart failure  
11 History of heart failure  
12 Refractory heart failure  
13 Acute right-sided heart failure  
14 Systolic heart failure  
15 Diastolic heart failure  
16 Decompensated chronic heart failure  
17 Right heart failure due to pulmonary hypertension  
18 Congestive heart failure due to left ventricular systolic dysfunction  
19 Chronic systolic heart failure  
20 Chronic diastolic heart failure  
21 Heart failure with preserved ejection fraction  
22 Acute exacerbation of chronic congestive heart failure  
23 Symptomatic congestive heart failure  
24 Heart failure with reduced ejection fraction  
25 Heart failure with reduced ejection fraction due to coronary artery disease  
26 Heart failure with reduced ejection fraction due to myocarditis  
27 Heart failure with reduced ejection fraction due to cardiomyopathy  
28 Heart failure with reduced ejection fraction due to heart valve disease  
29 Congestive heart failure with right heart failure  
30 Exacerbation of congestive heart failure  
31 Chronic combined systolic and diastolic heart failure  
32 Heart failure with mid range ejection fraction  
33 Low output heart failure due to and following Fontan operation  
34 Acute on chronic right-sided congestive heart failure  
35  
36  
37  
38  
39  
40  
41  
42  
43  
44  
45  
46  
47  
48  
49  
50  
51  
52  
53  
54  
55  
56  
57  
58  
59  
60

1  
2  
3  
4  
5  
6  
7  
8  
9  
10  
11  
12  
13  
14  
15  
16  
17  
18  
19  
20  
21  
22  
23  
24  
25  
26  
27  
28  
29  
30  
31  
32  
33  
34  
35  
36  
37  
38  
39  
40  
41  
42  
43  
44  
45  
46  
47  
48  
49  
50  
51  
52  
53  
54  
55  
56  
57  
58  
59  
60

For peer review only

1  
2  
3  
4  
5  
6  
7  
8  
9  
10  
11  
12  
13  
14  
15  
16  
17  
18  
19  
20  
21  
22  
23  
24  
25  
26  
27  
28  
29  
30  
31  
32  
33  
34  
35  
36  
37  
38  
39  
40  
41  
42  
43  
44  
45  
46  
47  
48  
49  
50  
51  
52  
53  
54  
55  
56  
57  
58  
59  
60

For peer review only

1  
2  
3  
4  
5  
6  
7  
8  
9  
10  
11  
12  
13  
14  
15  
16  
17  
18  
19  
20  
21  
22  
23  
24  
25  
26  
27  
28  
29  
30  
31  
32  
33  
34  
35  
36  
37  
38  
39  
40  
41  
42  
43  
44  
45  
46  
47  
48  
49  
50  
51  
52  
53  
54  
55  
56  
57  
58  
59  
60

For peer review only

1  
2  
3  
4  
5  
6  
7  
8  
9  
10  
11  
12  
13  
14  
15  
16  
17  
18  
19  
20  
21  
22  
23  
24  
25  
26  
27  
28  
29  
30  
31  
32  
33  
34  
35  
36  
37  
38  
39  
40  
41  
42  
43  
44  
45  
46  
47  
48  
49  
50  
51  
52  
53  
54  
55  
56  
57  
58  
59  
60

For peer review only

1  
2  
3  
4  
5  
6  
7  
8  
9  
10  
11  
12  
13  
14  
15  
16  
17  
18  
19  
20  
21  
22  
23  
24  
25  
26  
27  
28  
29  
30  
31  
32  
33  
34  
35  
36  
37  
38  
39  
40  
41  
42  
43  
44  
45  
46  
47  
48  
49  
50  
51  
52  
53  
54  
55  
56  
57  
58  
59  
60

For peer review only



1  
2  
3  
4  
5  
6  
7  
8  
9  
10  
11  
12  
13  
14  
15  
16  
17  
18  
19  
20  
21  
22  
23  
24  
25  
26  
27  
28  
29  
30  
31  
32  
33  
34  
35  
36  
37  
38  
39  
40  
41  
42  
43  
44  
45  
46  
47  
48  
49  
50  
51  
52  
53  
54  
55  
56  
57  
58  
59  
60

For peer review only

1  
2  
3  
4  
5  
6  
7  
8  
9  
10  
11  
12  
13  
14  
15  
16  
17  
18  
19  
20  
21  
22  
23  
24  
25  
26  
27  
28  
29  
30  
31  
32  
33  
34  
35  
36  
37  
38  
39  
40  
41  
42  
43  
44  
45  
46  
47  
48  
49  
50  
51  
52  
53  
54  
55  
56  
57  
58  
59  
60

For peer review only

1  
2  
3  
4  
5  
6  
7  
8  
9  
10  
11  
12  
13  
14  
15  
16  
17  
18  
19  
20  
21  
22  
23  
24  
25  
26  
27  
28  
29  
30  
31  
32  
33  
34  
35  
36  
37  
38  
39  
40  
41  
42  
43  
44  
45  
46  
47  
48  
49  
50  
51  
52  
53  
54  
55  
56  
57  
58  
59  
60

For peer review only

1  
2  
3  
4  
5  
6  
7  
8  
9  
10  
11  
12  
13  
14  
15  
16  
17  
18  
19  
20  
21  
22  
23  
24  
25  
26  
27  
28  
29  
30  
31  
32  
33  
34  
35  
36  
37  
38  
39  
40  
41  
42  
43  
44  
45  
46  
47  
48  
49  
50  
51  
52  
53  
54  
55  
56  
57  
58  
59  
60

For peer review only

1  
2  
3  
4  
5  
6  
7  
8  
9  
10  
11  
12  
13  
14  
15  
16  
17  
18  
19  
20  
21  
22  
23  
24  
25  
26  
27  
28  
29  
30  
31  
32  
33  
34  
35  
36  
37  
38  
39  
40  
41  
42  
43  
44  
45  
46  
47  
48  
49  
50  
51  
52  
53  
54  
55  
56  
57  
58  
59  
60

For peer review only

1  
2  
3  
4  
5  
6  
7  
8  
9  
10  
11  
12  
13  
14  
15  
16  
17  
18  
19  
20  
21  
22  
23  
24  
25  
26  
27  
28  
29  
30  
31  
32  
33  
34  
35  
36  
37  
38  
39  
40  
41  
42  
43  
44  
45  
46  
47  
48  
49  
50  
51  
52  
53  
54  
55  
56  
57  
58  
59  
60

For peer review only

1  
2  
3  
4  
5  
6  
7  
8  
9  
10  
11  
12  
13  
14  
15  
16  
17  
18  
19  
20  
21  
22  
23  
24  
25  
26  
27  
28  
29  
30  
31  
32  
33  
34  
35  
36  
37  
38  
39  
40  
41  
42  
43  
44  
45  
46  
47  
48  
49  
50  
51  
52  
53  
54  
55  
56  
57  
58  
59  
60

For peer review only

1  
2  
3  
4  
5  
6  
7  
8  
9  
10  
11  
12  
13  
14  
15  
16  
17  
18  
19  
20  
21  
22  
23  
24  
25  
26  
27  
28  
29  
30  
31  
32  
33  
34  
35  
36  
37  
38  
39  
40  
41  
42  
43  
44  
45  
46  
47  
48  
49  
50  
51  
52  
53  
54  
55  
56  
57  
58  
59  
60

For peer review only



1  
2  
3  
4  
5  
6  
7  
8  
9  
10  
11  
12  
13  
14  
15  
16  
17  
18  
19  
20  
21  
22  
23  
24  
25  
26  
27  
28  
29  
30  
31  
32  
33  
34  
35  
36  
37  
38  
39  
40  
41  
42  
43  
44  
45  
46  
47  
48  
49  
50  
51  
52  
53  
54  
55  
56  
57  
58  
59  
60

For peer review only

1  
2  
3  
4  
5  
6  
7  
8  
9  
10  
11  
12  
13  
14  
15  
16  
17  
18  
19  
20  
21  
22  
23  
24  
25  
26  
27  
28  
29  
30  
31  
32  
33  
34  
35  
36  
37  
38  
39  
40  
41  
42  
43  
44  
45  
46  
47  
48  
49  
50  
51  
52  
53  
54  
55  
56  
57  
58  
59  
60

For peer review only

1  
2  
3  
4  
5  
6  
7  
8  
9  
10  
11  
12  
13  
14  
15  
16  
17  
18  
19  
20  
21  
22  
23  
24  
25  
26  
27  
28  
29  
30  
31  
32  
33  
34  
35  
36  
37  
38  
39  
40  
41  
42  
43  
44  
45  
46  
47  
48  
49  
50  
51  
52  
53  
54  
55  
56  
57  
58  
59  
60

For peer review only

1  
2  
3  
4  
5  
6  
7  
8  
9  
10  
11  
12  
13  
14  
15  
16  
17  
18  
19  
20  
21  
22  
23  
24  
25  
26  
27  
28  
29  
30  
31  
32  
33  
34  
35  
36  
37  
38  
39  
40  
41  
42  
43  
44  
45  
46  
47  
48  
49  
50  
51  
52  
53  
54  
55  
56  
57  
58  
59  
60

For peer review only

1  
2  
3  
4  
5  
6  
7  
8  
9  
10  
11  
12  
13  
14  
15  
16  
17  
18  
19  
20  
21  
22  
23  
24  
25  
26  
27  
28  
29  
30  
31  
32  
33  
34  
35  
36  
37  
38  
39  
40  
41  
42  
43  
44  
45  
46  
47  
48  
49  
50  
51  
52  
53  
54  
55  
56  
57  
58  
59  
60

For peer review only

1  
2  
3  
4  
5  
6  
7  
8  
9  
10  
11  
12  
13  
14  
15  
16  
17  
18  
19  
20  
21  
22  
23  
24  
25  
26  
27  
28  
29  
30  
31  
32  
33  
34  
35  
36  
37  
38  
39  
40  
41  
42  
43  
44  
45  
46  
47  
48  
49  
50  
51  
52  
53  
54  
55  
56  
57  
58  
59  
60

For peer review only

1  
2  
3  
4  
5  
6  
7  
8  
9  
10  
11  
12  
13  
14  
15  
16  
17  
18  
19  
20  
21  
22  
23  
24  
25  
26  
27  
28  
29  
30  
31  
32  
33  
34  
35  
36  
37  
38  
39  
40  
41  
42  
43  
44  
45  
46  
47  
48  
49  
50  
51  
52  
53  
54  
55  
56  
57  
58  
59  
60

For peer review only

1  
2  
3  
4  
5  
6  
7  
8  
9  
10  
11  
12  
13  
14  
15  
16  
17  
18  
19  
20  
21  
22  
23  
24  
25  
26  
27  
28  
29  
30  
31  
32  
33  
34  
35  
36  
37  
38  
39  
40  
41  
42  
43  
44  
45  
46  
47  
48  
49  
50  
51  
52  
53  
54  
55  
56  
57  
58  
59  
60

For peer review only



1  
2  
3  
4  
5  
6  
7  
8  
9  
10  
11  
12  
13  
14  
15  
16  
17  
18  
19  
20  
21  
22  
23  
24  
25  
26  
27  
28  
29  
30  
31  
32  
33  
34  
35  
36  
37  
38  
39  
40  
41  
42  
43  
44  
45  
46  
47  
48  
49  
50  
51  
52  
53  
54  
55  
56  
57  
58  
59  
60

For peer review only

1  
2  
3  
4  
5  
6  
7  
8  
9  
10  
11  
12  
13  
14  
15  
16  
17  
18  
19  
20  
21  
22  
23  
24  
25  
26  
27  
28  
29  
30  
31  
32  
33  
34  
35  
36  
37  
38  
39  
40  
41  
42  
43  
44  
45  
46  
47  
48  
49  
50  
51  
52  
53  
54  
55  
56  
57  
58  
59  
60

For peer review only

1  
2  
3  
4  
5  
6  
7  
8  
9  
10  
11  
12  
13  
14  
15  
16  
17  
18  
19  
20  
21  
22  
23  
24  
25  
26  
27  
28  
29  
30  
31  
32  
33  
34  
35  
36  
37  
38  
39  
40  
41  
42  
43  
44  
45  
46  
47  
48  
49  
50  
51  
52  
53  
54  
55  
56  
57  
58  
59  
60

For peer review only

1  
2  
3  
4  
5  
6  
7  
8  
9  
10  
11  
12  
13  
14  
15  
16  
17  
18  
19  
20  
21  
22  
23  
24  
25  
26  
27  
28  
29  
30  
31  
32  
33  
34  
35  
36  
37  
38  
39  
40  
41  
42  
43  
44  
45  
46  
47  
48  
49  
50  
51  
52  
53  
54  
55  
56  
57  
58  
59  
60

For peer review only

1  
2  
3  
4  
5  
6  
7  
8  
9  
10  
11  
12  
13  
14  
15  
16  
17  
18  
19  
20  
21  
22  
23  
24  
25  
26  
27  
28  
29  
30  
31  
32  
33  
34  
35  
36  
37  
38  
39  
40  
41  
42  
43  
44  
45  
46  
47  
48  
49  
50  
51  
52  
53  
54  
55  
56  
57  
58  
59  
60

For peer review only

1  
2  
3  
4  
5  
6  
7  
8  
9  
10  
11  
12  
13  
14  
15  
16  
17  
18  
19  
20  
21  
22  
23  
24  
25  
26  
27  
28  
29  
30  
31  
32  
33  
34  
35  
36  
37  
38  
39  
40  
41  
42  
43  
44  
45  
46  
47  
48  
49  
50  
51  
52  
53  
54  
55  
56  
57  
58  
59  
60

For peer review only

1  
2  
3  
4  
5  
6  
7  
8  
9  
10  
11  
12  
13  
14  
15  
16  
17  
18  
19  
20  
21  
22  
23  
24  
25  
26  
27  
28  
29  
30  
31  
32  
33  
34  
35  
36  
37  
38  
39  
40  
41  
42  
43  
44  
45  
46  
47  
48  
49  
50  
51  
52  
53  
54  
55  
56  
57  
58  
59  
60

For peer review only

1  
2  
3  
4  
5  
6  
7  
8  
9  
10  
11  
12  
13  
14  
15  
16  
17  
18  
19  
20  
21  
22  
23  
24  
25  
26  
27  
28  
29  
30  
31  
32  
33  
34  
35  
36  
37  
38  
39  
40  
41  
42  
43  
44  
45  
46  
47  
48  
49  
50  
51  
52  
53  
54  
55  
56  
57  
58  
59  
60

ick) score

For peer review only



|    |             |
|----|-------------|
| 1  |             |
| 2  | ICD-10 Code |
| 3  | I25.3       |
| 4  | I72.8       |
| 5  | I72         |
| 6  | I72.9       |
| 7  | I77.0       |
| 8  | I77.0       |
| 9  | Q27.3       |
| 10 | I67.1       |
| 11 | I25.4       |
| 12 | H35.0       |
| 13 | I60.7       |
| 14 | I77.0       |
| 15 | I77.74      |
| 16 | I28.1       |
| 17 | A52.01      |
| 18 | I72.4       |
| 19 | I72.1       |
| 20 | I72.2       |
| 21 | I71.6       |
| 22 | I71         |
| 23 | I71.1       |
| 24 | I71.3       |
| 25 | I71.3       |
| 26 | Q25.43      |
| 27 | I71.2       |
| 28 | I71.4       |
| 29 | I72.3       |
| 30 | I70.0       |
| 31 | I72.9       |
| 32 | I71.8       |
| 33 | I79.0       |
| 34 | I25.41      |
| 35 | I72.5       |
| 36 | I71.9       |
| 37 | I71.60      |
| 38 | I71.62      |
| 39 | H11.41      |
| 40 | I71.11      |
| 41 | I71.12      |
| 42 | I72.6       |
| 43 | I71.10      |
| 44 | I71.13      |
| 45 | I71.21      |
| 46 | I71.22      |
| 47 | I71.30      |
| 48 | I71.31      |
| 49 | I71.31      |
| 50 | I71.32      |
| 51 | I71.33      |
| 52 | I71.50      |
| 53 | I71.51      |
| 54 | I71.51      |
| 55 | I71.52      |
| 56 | I71.52      |
| 57 | I71.52      |
| 58 | I71.52      |
| 59 | I71.52      |
| 60 | I71.52      |

For peer review only

1  
2 I25.42  
3 I71.20  
4 I71.23  
5 I71.40  
6 I71.41  
7 I71.42  
8 I71.43  
9 I71.61  
10 I77.0  
11 Q27.8  
12 Q24.5  
13 Q27.8  
14 Q25.79  
15 Q14.1  
16 I72.0  
17 I72.5  
18 I72.6  
19 A52.05  
20 Q20.2  
21 I77.3  
22 I78.0  
23 I67.7  
24 I70.218  
25 I70.211  
26 I70.212  
27 I70.213  
28 I70.219  
29 I70.311  
30 I70.312  
31 I70.313  
32 I70.21  
33 I70.31  
34 I70.41  
35 I70.51  
36 I70.61  
37 I70.611  
38 I70.612  
39 I70.613  
40 I70.618  
41 I70.619  
42 I70.71  
43 I70.318  
44 I70.319  
45 I70.411  
46 I70.412  
47 I70.413  
48 I70.418  
49 I70.419  
50 I70.511  
51 I70.512  
52  
53  
54  
55  
56  
57  
58  
59  
60

For peer review only

1  
2 I70.513  
3 I70.518  
4 I70.519  
5 I70.711  
6 I70.712  
7 I70.713  
8 I70.718  
9 I70.719  
10 I87  
11 I87.0  
12 I71  
13 I71.0  
14 I77.1  
15 I77.2  
16 I77.7  
17 I25.4  
18 I67.0  
19 I70  
20 I70.0  
21 I70.1  
22 I12  
23 I70.2  
24 I70.8  
25 I70.9  
26 I25.0  
27 I25.1  
28 Q23.0  
29 Q25.2  
30 Q25.3  
31 I36.0  
32 I36.2  
33 I37.0  
34 I37.2  
35 I42.1  
36 I34.2  
37 I35.0  
38 I35.2  
39 I60  
40 I60.0  
41 I60.1  
42 I60.2  
43 I60.3  
44 I60.4  
45 I60.5  
46 I60.6  
47 I60.7  
48 I60.8  
49 I60.9  
50 I69.0  
51 I61

For peer review only

1  
2 I61.0  
3 I61.1  
4 I61.2  
5 I61.3  
6 I61.4  
7 I61.5  
8 I61.6  
9 I61.8  
10 I61.9  
11 I62  
12 I62.0  
13 I62.1  
14 I62.9  
15 I69.1  
16 I69.2  
17 I69.3  
18 I69.4  
19 I69.8  
20 F01.0  
21 F01  
22 F01.2  
23 F01.3  
24 F01.8  
25 F01.9  
26 I77.6  
27 I26  
28 I26.0  
29 I26.9  
30 I48.3  
31 I48.4  
32 I48.9  
33 I49.0  
34 I49  
35 I49.8  
36 I49.9  
37 I21  
38 I21.0  
39 I21.1  
40 I21.2  
41 I21.3  
42 I21.4  
43 I21.9  
44 I22.0  
45 I22.1  
46 I22.8  
47 I22.9  
48  
49  
50  
51  
52  
53  
54  
55  
56  
57  
58  
59  
60

For peer review only

1  
2 Medcodeid  
3 3528309015  
4 618411000000118  
5 618421000000112  
6 618431000000114  
7 618441000000117  
8 618451000000119  
9 618461000000116  
10 618471000000111  
11 618481000000113  
12 618491000000110  
13 618501000000116  
14 618511000000119  
15 618521000000113  
16 1854991000006119  
17 1940501000006119  
18 1940511000006116  
19 1940521000006112  
20 1940531000006110  
21 1940541000006117  
22 1940551000006115  
23 1940571000006113  
24 1940581000006111  
25 1940591000006114  
26 1940601000006118  
27 1940611000006115  
28 1940621000006111  
29 1940631000006114  
30 1940641000006116  
31 1940651000006119  
32 1940661000006117  
33 1940671000006112  
34 7147761000006113  
35 7147781000006115  
36 7174791000006111  
37 7174851000006111  
38 7643311000006115  
39 8104231000006115  
40 8104261000006112  
41 8104301000006115  
42 8104381000006112  
43 8104451000006111  
44 8104551000006112  
45 1409014  
46 64282015  
47 108730018  
48 109700019  
49 110659019  
50 143003017  
51 293759015

For peer review only

1 299665018  
2 299673010  
3 299675015  
4 354521013  
5 354537019  
6 395753015  
7 213101000006114  
8 21552100000116  
9 581531000006115  
10 641491000006116  
11 741701000006114  
12 789941000006117  
13 811521000006115  
14 886721000006116  
15 3013481000006111  
16 3245871000006111  
17 3902031000006117  
18 3974181000006119  
19 5063361000006117  
20 5063371000006112  
21 5095431000006117  
22 7615371000006117  
23 7643331000006114  
24 7854191000006115  
25 12051941000006113  
26 12704471000006116  
27 278834012  
28 278835013  
29 303951011  
30 305192017  
31 354417015  
32 356557018  
33 394639018  
34 396711013  
35 402249011  
36 403109016  
37 454255014  
38 509111010  
39 424731000006111  
40 480871000006117  
41 619541000006116  
42 641471000006117  
43 886631000006110  
44 887731000006115  
45 906301000006115  
46 3183501000006111  
47 3245851000006118  
48 3245861000006116  
49 3245881000006114  
50 3331291000006117

For peer review only

1  
2 3973811000006118  
3 3973841000006119  
4 5094141000006118  
5 5094161000006119  
6 5094171000006114  
7  
8 7043231000006112  
9 7841541000006119  
10 300871017  
11 303943013  
12  
13 303949012  
14 303960015  
15 396713011  
16 2159984015  
17 84921000006110  
18 177341000006111  
19  
20 424791000006110  
21 913841000006116  
22 914031000006118  
23 3974161000006112  
24 7484781000006119  
25  
26 314302019  
27 314306016  
28 314307013  
29 315750010  
30 354317019  
31 400870015  
32 400871016  
33 411547015  
34 483965010  
35 505126019  
36 1226060014  
37 2767154014  
38 2767384012  
39 2767385013  
40 2771041011  
41 2773184015  
42 3527814014  
43 304051000000112  
44 304071000000115  
45 304091000000116  
46 304111000000114  
47 406821000000110  
48 407481000000111  
49 408261000000119  
50 408281000000111  
51 408301000000112  
52 408321000000115  
53 408341000000110  
54 408381000000119  
55 526441000000118  
56  
57  
58  
59  
60

For peer review only

1 557811000000119  
2 557831000000110  
3 595541000000119  
4 595661000000119  
5 595721000000116  
6 595811000000117  
7 595871000000110  
8 595931000000116  
9 595991000000115  
10 596051000000115  
11 596131000000114  
12 596191000000110  
13 596261000000111  
14 596321000000110  
15 596401000000111  
16 893231000006117  
17 994391000006115  
18 994411000006115  
19 994421000006111  
20 994441000006116  
21 999981000006116  
22 999991000006118  
23 1000001000006114  
24 1823941000006114  
25 1825111000006112  
26 1850891000006119  
27 1856481000006117  
28 2002941000006114  
29 2002961000006113  
30 2002971000006118  
31 2002981000006115  
32 2115881000000117  
33 2117811000000117  
34 2962391000006111  
35 2962421000006115  
36 3245841000006115  
37 3842511000006119  
38 4827551000006116  
39 5335381000006115  
40 5335401000006115  
41 5335421000006113  
42 5335431000006111  
43 5574511000006116  
44 7480371000006113  
45 7615331000006115  
46 7615361000006112  
47 7714891000006118  
48 7714921000006112  
49 7966611000006114  
50 7966641000006113

For peer review only



1  
2 796669100006116  
3 796676100006115  
4 802749100006113  
5 803042100006114  
6 803043100006112  
7 803044100006119  
8 804066100006119  
9 804068100006112  
10 804069100006110  
11 804069100006110  
12 804406100006119  
13 821240100006115  
14 821471100006116  
15 821884100006117  
16 821912100006112  
17 834593100006110  
18 834600100006110  
19 834602100006117  
20 1202993100006117  
21 1417432100006116  
22 354316011  
23 324973015  
24 181658100006110  
25 710351100006119  
26 136885015  
27 377976016  
28 1406758100006118  
29 329116017  
30 38464100006114  
31 71361100006110  
32  
33  
34  
35  
36  
37  
38  
39  
40  
41  
42  
43  
44  
45  
46  
47  
48  
49  
50  
51  
52  
53  
54  
55  
56  
57  
58  
59  
60

For peer review only

1  
2 Term

3 MCKD - Multicystic kidney disease

4 CKD stage 2 with proteinuria

5 CKD stage 2 without proteinuria

6 CKD stage 3 with proteinuria

7 CKD stage 3 without proteinuria

8 CKD stage 3A with proteinuria

9 CKD stage 3A without proteinuria

10 CKD stage 3B with proteinuria

11 CKD stage 3B without proteinuria

12 CKD stage 4 with proteinuria

13 CKD stage 4 without proteinuria

14 CKD stage 5 with proteinuria

15 CKD stage 5 without proteinuria

16 EGFR 3 month repeat test for CKD confirmatory

17 CKD G4A1 - chronic kidney disease with glomerular filtration rate category G4 and albuminuria category A1

18 CKD G4A2 - chronic kidney disease with glomerular filtration rate category G4 and albuminuria category A2

19 CKD G4A3 - chronic kidney disease with glomerular filtration rate category G4 and albuminuria category A3

20 CKD G5A1 - chronic kidney disease with glomerular filtration rate category G5 and albuminuria category A1

21 CKD G5A2 - chronic kidney disease with glomerular filtration rate category G5 and albuminuria category A2

22 CKD G5A3 - chronic kidney disease with glomerular filtration rate category G5 and albuminuria category A3

23 CKD G1A2 - chronic kidney disease with glomerular filtration rate category G1 and albuminuria category A2

24 CKD G1A3 - chronic kidney disease with glomerular filtration rate category G1 and albuminuria category A3

25 CKD G2A1 - chronic kidney disease with glomerular filtration rate category G2 and albuminuria category A1

26 CKD G2A2 - chronic kidney disease with glomerular filtration rate category G2 and albuminuria category A2

27 CKD G2A3 - chronic kidney disease with glomerular filtration rate category G2 and albuminuria category A3

28 CKD G3aA1 - chronic kidney disease with glomerular filtration rate category G3a and albuminuria category /

29 CKD G3aA2 - chronic kidney disease with glomerular filtration rate category G3a and albuminuria category /

30 CKD G3aA3 - chronic kidney disease with glomerular filtration rate category G3a and albuminuria category /

31 CKD G3bA1 - chronic kidney disease with glomerular filtration rate category G3b and albuminuria category /

32 CKD G3bA2 - chronic kidney disease with glomerular filtration rate category G3b and albuminuria category /

33 CKD G3bA3 - chronic kidney disease with glomerular filtration rate category G3b and albuminuria category /

34 CKD stage 2

35 CKD stage 4

36 CKD stage 3

37 CKD stage 5

38 CKD - chronic kidney disease

39 CKD (chronic kidney disease) stage 3 with proteinuria

40 CKD (chronic kidney disease) stage 3 without proteinuria

41 CKD (chronic kidney disease) stage 3A with proteinuria

42 CKD (chronic kidney disease) stage 3B with proteinuria

43 CKD (chronic kidney disease) stage 4 with proteinuria

44 CKD (chronic kidney disease) stage 5 without proteinuria

45 Benign hypertensive renal disease

46 Hypertensive renal disease

47 Malignant hypertensive renal disease

48 Benign hypertensive heart AND renal disease

49 Malignant hypertensive heart AND renal disease

50 Hypertensive heart AND renal disease

51 Diabetic renal disease

1 Hypertensive renal disease with renal failure  
2 Hypertensive heart and renal disease with renal failure  
3 Hypertensive heart and renal disease NOS  
4 Renal involvement in malignant disease  
5 Chronic drug-induced renal disease  
6 Hypertensive renal disease NOS  
7 Pre-existing hypertensive heart and renal disease complicating pregnancy, childbirth and the puerperium  
8 End stage renal disease  
9 Congenital cystic renal disease  
10 End-stage renal disease  
11 Hypertensive heart and renal disease with (congestive) heart failure  
12 Hypertensive heart and renal disease with both (congestive) heart failure and renal failure  
13 H/O: renal disease  
14 Renal disease NOS  
15 Cardiovascular renal disease  
16 ESRD - End stage renal disease  
17 Cardiorenal disease  
18 Renal disease  
19 Anaemia of renal disease  
20 Anemia of renal disease  
21 Renal disorders in inherited disease  
22 Anaemia in end stage renal disease  
23 Chronic renal disease  
24 HDR (hypoparathyroidism, sensorineural deafness, renal disease) syndrome  
25 Renal parenchymal disease  
26 End-stage renal disease  
27 Other specified compensation for renal failure  
28 Compensation for renal failure NOS  
29 Renal function impairment with growth failure  
30 [X]Other chronic renal failure  
31 Acute-on-chronic renal failure  
32 Renal failure-associated hyperphosphataemia  
33 Compensation for renal failure  
34 RF - Renal failure  
35 Congenital renal failure  
36 Renal failure as a complication of care  
37 Anaemia secondary to renal failure  
38 Chronic renal failure  
39 Renal failure  
40 Anaemia of chronic renal failure  
41 Dialysis for renal failure  
42 End stage renal failure  
43 Renal failure NOS  
44 Renal failure  
45 [RFC] Renal probs including renal failure  
46 Renal failure syndrome  
47 ESRF - End stage renal failure  
48 ESCRF - End stage chronic renal failure  
49 End stage chronic renal failure  
50 Hepatorenal failure

1  
2 Chronic renal failure syndrome  
3 CRF - Chronic renal failure  
4 Acute on chronic renal failure  
5 End stage renal failure on dialysis  
6 End stage renal failure with renal transplant  
7 Chronic progressive renal failure  
8 Renal insufficiency  
9  
10 [X]Hypertension secondary to other renal disorders  
11 Impaired renal function disorder  
12 Other impaired renal function disorder  
13 Impaired renal function disorder NOS  
14 Other impaired renal function disorder NOS  
15 Renal disorder education  
16 Renal disorder due to type 2 diabetes mellitus  
17 Renal tubulo-interstitial disorders in transplant rejection  
18 [X]Renal tubulo-interstitial disorders/transplant rejection  
19 Renal disorder associated with type 1 diabetes mellitus  
20 Renal disorder associated with type II diabetes mellitus  
21 Renal disorder  
22 Renal disorder medication review  
23 Congenital cystic kidney disease  
24 Other congenital cystic kidney disease NOS  
25 Congenital cystic kidney disease NOS  
26 Cystic kidney disease  
27 Kidney disease  
28 Polycystic kidney disease NOS  
29 Fibrocystic kidney disease  
30 H/O: kidney disease  
31 Autosomal dominant polycystic kidney disease  
32 Polycystic kidney disease  
33 Autosomal recessive polycystic kidney disease  
34 Chronic kidney disease stage 5  
35 Chronic kidney disease stage 2  
36 Chronic kidney disease stage 4  
37 Chronic kidney disease  
38 Chronic kidney disease stage 3  
39 Chronic kidney disease clinical management plan  
40 Chronic kidney disease stage 2  
41 Chronic kidney disease stage 3  
42 Chronic kidney disease stage 4  
43 Chronic kidney disease stage 5  
44 Chronic kidney disease monitoring administration  
45 Chronic kidney disease monitoring  
46 Chronic kidney disease monitoring first letter  
47 Chronic kidney disease monitoring second letter  
48 Chronic kidney disease monitoring third letter  
49 Chronic kidney disease monitoring verbal invite  
50 Chronic kidney disease monitoring telephone invite  
51 Chronic kidney disease annual review  
52 Did not attend chronic kidney disease monitoring clinic  
53  
54  
55  
56  
57  
58  
59  
60

1  
2 Chronic kidney disease stage 3A  
3 Chronic kidney disease stage 3B  
4 Chronic kidney disease stage 1 with proteinuria  
5 Chronic kidney disease stage 2 with proteinuria  
6 Chronic kidney disease stage 2 without proteinuria  
7 Chronic kidney disease stage 3 with proteinuria  
8 Chronic kidney disease stage 3 without proteinuria  
9 Chronic kidney disease stage 3A with proteinuria  
10 Chronic kidney disease stage 3A without proteinuria  
11 Chronic kidney disease stage 3B with proteinuria  
12 Chronic kidney disease stage 3B without proteinuria  
13 Chronic kidney disease stage 4 with proteinuria  
14 Chronic kidney disease stage 4 without proteinuria  
15 Chronic kidney disease stage 5 with proteinuria  
16 Chronic kidney disease stage 5 without proteinuria  
17 Cystic kidney disease  
18 Chronic kidney disease stage  
19 Chronic kidney disease stage 2  
20 Chronic kidney disease stage 3  
21 Chronic kidney disease stage 5  
22 Exception reporting - chronic kidney disease quality indicators  
23 Excepted from chronic kidney disease quality indicators - patient unsuitable  
24 Excepted from chronic kidney disease quality indicators - informed dissent  
25 Chronic kidney disease confirmed  
26 Chronic kidney disease diagnosis discussed with patient  
27 Reason for influenza vaccine - chronic kidney disease  
28 Chronic kidney disease follow-up  
29 Chronic kidney disease monthly review  
30 Chronic kidney disease 3 monthly review  
31 Chronic kidney disease 4 monthly review  
32 Chronic kidney disease six monthly review  
33 Chronic kidney disease self-management plan review  
34 Chronic kidney disease self-management plan agreed  
35 Polycystic kidney disease, infantile type  
36 Infantile polycystic kidney disease  
37 End stage kidney disease  
38 PKD - Polycystic kidney disease  
39 Familial juvenile medullary cystic kidney disease  
40 Adult type polycystic kidney disease type 1  
41 PKD1 - Polycystic kidney disease 1  
42 PKD2 - Polycystic kidney disease 2  
43 Autosomal dominant polycystic kidney disease in childhood  
44 History of kidney disease  
45 H/O chronic kidney disease  
46 Anaemia in chronic kidney disease  
47 Anemia in chronic kidney disease  
48 Chronic kidney disease stage 5 on dialysis  
49 Chronic kidney disease stage 5 with transplant  
50 Chronic kidney disease stage 5 due to type 2 diabetes mellitus  
51 Chronic kidney disease stage 4 due to type 2 diabetes mellitus  
52  
53  
54  
55  
56  
57  
58  
59  
60

1  
2 Chronic kidney disease stage 3 due to type 2 diabetes mellitus  
3 Chronic kidney disease stage 2 due to type 2 diabetes mellitus  
4 Chronic kidney disease stage 5 due to type 1 diabetes mellitus  
5 Hypertensive heart AND chronic kidney disease stage 4  
6 Hypertensive heart AND chronic kidney disease stage 3  
7 Hypertensive heart AND chronic kidney disease stage 2  
8 Chronic kidney disease stage 4 due to hypertension  
9 Chronic kidney disease stage 3 due to hypertension  
10 Chronic kidney disease stage 2 due to hypertension  
11 Hypertension in chronic kidney disease stage 3 due to type 2 diabetes mellitus  
12 Anaemia co-occurrent and due to chronic kidney disease stage 3  
13 Chronic kidney disease monitoring invitation  
14 Chronic kidney disease monitoring verbal invitation  
15 Chronic kidney disease monitoring telephone invitation  
16 Chronic kidney disease with glomerular filtration rate category G3a and albuminuria category A3  
17 Chronic kidney disease with glomerular filtration rate category G3b and albuminuria category A1  
18 Chronic kidney disease with glomerular filtration rate category G3b and albuminuria category A2  
19 ADPKD - autosomal dominant polycystic kidney disease  
20 Chronic kidney disease stage 5 due to drug induced diabetes mellitus  
21 Kidney disorder due to diabetes mellitus  
22 Kidney transplant failure and rejection  
23 Kidney failure unspecified  
24 Disorder related to renal transplantation  
25 Congenital cystic disease of kidney  
26 Cystic disease of kidney  
27 Disorder of kidney due to diabetes mellitus  
28 Failure of sterile precautions during kidney dialysis  
29 [X]Failure sterile precautions dur kidney dialys/other perf  
30 Mechanical failure of instrument or apparatus during kidney dialysis  
31  
32  
33  
34  
35  
36  
37  
38  
39  
40  
41  
42  
43  
44  
45  
46  
47  
48  
49  
50  
51  
52  
53  
54  
55  
56  
57  
58  
59  
60

1  
2  
3  
4  
5  
6  
7  
8  
9  
10  
11  
12  
13  
14  
15  
16  
17  
18  
19  
20  
21  
22  
23  
24  
25  
26  
27  
28  
29  
30  
31  
32  
33  
34  
35  
36  
37  
38  
39  
40  
41  
42  
43  
44  
45  
46  
47  
48  
49  
50  
51  
52  
53  
54  
55  
56  
57  
58  
59  
60

A1  
A2  
A3  
A1  
A2  
A3

For peer review only

1  
2  
3  
4  
5  
6  
7  
8  
9  
10  
11  
12  
13  
14  
15  
16  
17  
18  
19  
20  
21  
22  
23  
24  
25  
26  
27  
28  
29  
30  
31  
32  
33  
34  
35  
36  
37  
38  
39  
40  
41  
42  
43  
44  
45  
46  
47  
48  
49  
50  
51  
52  
53  
54  
55  
56  
57  
58  
59  
60

For peer review only



|    |             |                                     |
|----|-------------|-------------------------------------|
| 1  |             |                                     |
| 2  | ICD-10 code | Term                                |
| 3  | N18         | Chronic Kidney Disease              |
| 4  | N18.3       | Chronic kidney disease, stage 3     |
| 5  | N18.4       | Chronic kidney disease, stage 4     |
| 6  | N18.5       | Chronic kidney disease, stage 5     |
| 7  | N18.9       | Chronic kidney disease, unspecified |
| 8  | N19         | Unspecified Kidney Failure          |
| 9  |             |                                     |
| 10 |             |                                     |
| 11 |             |                                     |
| 12 |             |                                     |
| 13 |             |                                     |
| 14 |             |                                     |
| 15 |             |                                     |
| 16 |             |                                     |
| 17 |             |                                     |
| 18 |             |                                     |
| 19 |             |                                     |
| 20 |             |                                     |
| 21 |             |                                     |
| 22 |             |                                     |
| 23 |             |                                     |
| 24 |             |                                     |
| 25 |             |                                     |
| 26 |             |                                     |
| 27 |             |                                     |
| 28 |             |                                     |
| 29 |             |                                     |
| 30 |             |                                     |
| 31 |             |                                     |
| 32 |             |                                     |
| 33 |             |                                     |
| 34 |             |                                     |
| 35 |             |                                     |
| 36 |             |                                     |
| 37 |             |                                     |
| 38 |             |                                     |
| 39 |             |                                     |
| 40 |             |                                     |
| 41 |             |                                     |
| 42 |             |                                     |
| 43 |             |                                     |
| 44 |             |                                     |
| 45 |             |                                     |
| 46 |             |                                     |
| 47 |             |                                     |
| 48 |             |                                     |
| 49 |             |                                     |
| 50 |             |                                     |
| 51 |             |                                     |
| 52 |             |                                     |
| 53 |             |                                     |
| 54 |             |                                     |
| 55 |             |                                     |
| 56 |             |                                     |
| 57 |             |                                     |
| 58 |             |                                     |
| 59 |             |                                     |
| 60 |             |                                     |

For peer review only

| 1  | Medcodeid         | Term                                                                           |
|----|-------------------|--------------------------------------------------------------------------------|
| 2  | 24192017          | Oesophageal varices without bleeding                                           |
| 3  | 268812014         | Open operations on oesophageal varices                                         |
| 4  | 300779013         | Oesophageal varices without bleeding in diseases EC                            |
| 5  | 451442010         | Oesophageal varices in cirrhosis of the liver                                  |
| 6  | 862771000006116   | Oesophageal varices injected                                                   |
| 7  | 456800015         | Oesophageal varices NOS                                                        |
| 8  | 4656781000006112  | Fibreoptic oesophagoscopy and banding of oesophageal varices                   |
| 9  | 4657171000006111  | Rigid oesophagoscopy and banding of oesophageal varices                        |
| 10 | 2960631000006115  | OV - Oesophageal varices                                                       |
| 11 | 300784019         | Oesophageal varices in diseases EC NOS                                         |
| 12 | 990631000006117   | Oesophageal varices                                                            |
| 13 | 5076881000006115  | Sclerotherapy of oesophageal varices                                           |
| 14 | 3691711000006118  | Injection of sclerosing agent into oesophageal varices by endoscopy            |
| 15 | 5076631000006115  | Operation on oesophageal varices                                               |
| 16 | 5076901000006118  | Injection of scleroscant into oesophageal varices                              |
| 17 | 7329311000006114  | Endoscopy of upper gastrointestinal tract and injection of oesophageal varices |
| 18 | 7329331000006115  | Oesophagogastroduodenoscopy and injection of oesophageal varices               |
| 19 | 300993011         | [X]Oesophageal varices in diseases classified elsewhere                        |
| 20 | 4779721000006113  | Oesophageal varices with bleeding, associated with another disorder            |
| 21 | 4657131000006113  | Rigid oesophagoscopy and injection sclerotherapy of varices                    |
| 22 | 4656741000006118  | Fibreoptic oesophagoscopy and injection sclerotherapy of varices               |
| 23 | 2781041000006115  | Oesophageal varices with haemorrhage                                           |
| 24 | 453265010         | Oesophageal varices in alcoholic cirrhosis of the liver                        |
| 25 | 8284331000006113  | Fluoroscopy guided endoscopic banding of oesophageal varices                   |
| 26 | 268885015         | Fibreoptic endoscopic banding of oesophageal varices                           |
| 27 | 7329421000006112  | Oesophagogastroduodenoscopy and ligation of duodenal varices                   |
| 28 | 708811000006119   | Fibreoptic endoscopic injection sclerotherapy to oesophageal varices           |
| 29 | 3691701000006116  | Endoscopic injection of oesophageal varices                                    |
| 30 | 7516751000006110  | Transgastric plication of oesophageal varices                                  |
| 31 | 3691731000006112  | Injection of oesophageal varices by endoscopy                                  |
| 32 | 12726301000006115 | Oesophageal varices NOS                                                        |
| 33 | 4779691000006115  | Oesophageal varices associated with another disorder                           |
| 34 | 4779751000006116  | Oesophageal varices without bleeding, associated with another disorder         |
| 35 | 268819017         | Open injection sclerotherapy to oesophageal varices                            |
| 36 | 268957016         | Rigid oesophagoscopy and banding of oesophageal varices                        |
| 37 | 7329201000006115  | Endoscopy of upper gastrointestinal tract and banding of oesophageal varices   |
| 38 | 3691641000006113  | Oesophagoscopy for injection of oesophageal varices                            |
| 39 | 394102015         | Other specified open operation on oesophageal varices                          |
| 40 | 1216060010        | Oesophageal varices with bleeding                                              |
| 41 | 300775019         | Oesophageal varices in diseases EC                                             |
| 42 | 300776018         | Oesophageal varices with bleeding in diseases EC                               |
| 43 | 48003016          | Oesophageal varices                                                            |
| 44 | 7328901000006119  | Oesophagogastroduodenoscopy and injection of gastric varices                   |
| 45 | 7329381000006119  | Oesophagogastroduodenoscopy and banding of gastric varices                     |
| 46 | 7329221000006113  | Oesophagogastroduodenoscopy and banding of oesophageal varices                 |
| 47 | 2781061000006116  | BOV - Bleeding oesophageal varices                                             |
| 48 | 2781011000006119  | Bleeding oesophageal varices                                                   |
| 49 | 4657401000006111  | Balloon tamponade of oesophageal varices                                       |
| 50 | 268827014         | Open operation on oesophageal varices NOS                                      |

|    |                  |                                                                                        |
|----|------------------|----------------------------------------------------------------------------------------|
| 1  |                  |                                                                                        |
| 2  | 987751000006119  | Oesophageal varices injected                                                           |
| 3  | 737961000006116  | Ligation of oesophageal varices                                                        |
| 4  | 7813031000006112 | Downhill varices of oesophagus                                                         |
| 5  | 163571000006112  | Endoscopic injection sclerotherapy to varices of oesophagus using rigid oesophagoscopi |
| 6  | 8462251000006117 | Hepatic coma due to chronic hepatic failure                                            |
| 7  | 7024461000006115 | Hepatic coma due to chronic hepatitis B                                                |
| 8  | 8047801000006118 | Hepatic coma due to chronic hepatitis B with delta agent                               |
| 9  | 7024441000006119 | Chronic hepatitis B with hepatic coma                                                  |
| 10 | 7024451000006117 | Chronic viral hepatitis B with hepatic coma                                            |
| 11 | 4200821000006111 | Viral hepatitis B without hepatic coma                                                 |
| 12 | 286862019        | Hepatic coma due to viral hepatitis B                                                  |
| 13 | 2919481000006111 | Viral hepatitis B with hepatic coma                                                    |
| 14 | 120980011        | Hepatic coma                                                                           |
| 15 | 8032441000006115 | Hepatic coma due to hepatitis                                                          |
| 16 | 8467441000006116 | Hepatic coma due to subacute liver failure                                             |
| 17 | 68294019         | Viral hepatitis with hepatic coma                                                      |
| 18 | 179049010        | Viral hepatitis without hepatic coma                                                   |
| 19 | 8046451000006115 | Hepatic coma due to chronic hepatitis C                                                |
| 20 | 8458771000006112 | Hepatic coma due to alcoholic liver failure                                            |
| 21 | 286867013        | Other specified viral hepatitis with coma                                              |
| 22 | 286869011        | Other specified viral hepatitis with hepatic coma NOS                                  |
| 23 | 4412421000006113 | Hepatocellular carcinoma, sarcomatoid                                                  |
| 24 | 286868015        | Viral hepatitis C with coma                                                            |
| 25 | 286876018        | Unspecified viral hepatitis with coma                                                  |
| 26 | 288171017        | Hepatic coma due to viral hepatitis                                                    |
| 27 | 8467451000006119 | Coma due to subacute hepatic failure                                                   |
| 28 | 7376511000006111 | Hepatic encephalopathy in fulminant hepatic failure                                    |
| 29 | 2720841000006110 | Hepatocerebral encephalopathy                                                          |
| 30 | 221131000000118  | Hepatic encephalopathy                                                                 |
| 31 | 396394015        | Other sequelae of chronic liver disease                                                |
| 32 | 303466016        | Liver abscess and sequelae of chronic liver disease                                    |
| 33 | 303489012        | Liver abscess and chronic liver disease causing sequelae NOS                           |
| 34 | 57989014         | Portal hypertension                                                                    |
| 35 | 8019271000006110 | History of portal hypertension                                                         |
| 36 | 7705401000006112 | Portal hypertension caused by antiretroviral drug                                      |
| 37 | 7617291000006116 | Portal hypertension in classical cystic fibrosis                                       |
| 38 | 7837281000006116 | Idiopathic portal hypertension                                                         |
| 39 | 3059491000006115 | PHT - Portal hypertension                                                              |
| 40 | 5914631000006112 | Portal hypertensive gastropathy                                                        |
| 41 | 7617281000006119 | Portal hypertension due to cystic fibrosis                                             |
| 42 | 7705411000006110 | Portal hypertension caused by anti-retroviral drug                                     |
| 43 | 7304981000006110 | Pulmonary arterial hypertension associated with portal hypertension                    |
| 44 | 3510791000006110 | Familial arthrogryposis - cholestatic hepatorenal syndrome                             |
| 45 | 3510771000006114 | Familial arthrogryposis-cholestatic hepatorenal syndrome                               |
| 46 | 85441018         | Hepatorenal syndrome                                                                   |
| 47 | 4656791000006110 | Fiberoptic endoscopic banding of esophageal varices                                    |
| 48 | 2781081000006114 | BOV - Bleeding esophageal varices                                                      |
| 49 | 4656751000006116 | Fiberoptic endoscopic injection sclerotherapy to esophageal varices                    |
| 50 | 2781071000006111 | Esophageal varices with bleeding                                                       |
| 51 | 4779771000006114 | Esophageal varices without bleeding, associated with another disorder                  |
| 52 |                  |                                                                                        |
| 53 |                  |                                                                                        |
| 54 |                  |                                                                                        |
| 55 |                  |                                                                                        |
| 56 |                  |                                                                                        |
| 57 |                  |                                                                                        |
| 58 |                  |                                                                                        |
| 59 |                  |                                                                                        |
| 60 |                  |                                                                                        |

|    |                  |                                                                                      |
|----|------------------|--------------------------------------------------------------------------------------|
| 1  |                  |                                                                                      |
| 2  | 3595991000006116 | Ligation of esophageal varices                                                       |
| 3  | 4779741000006118 | Esophageal varices with bleeding, associated with another disorder                   |
| 4  | 4657191000006112 | Rigid esophagoscopy and banding of esophageal varices                                |
| 5  | 3691681000006119 | Injection of esophageal varices by endoscopy                                         |
| 6  | 5076891000006117 | Injection of sclerosant into esophageal varices                                      |
| 7  |                  |                                                                                      |
| 8  | 7329411000006116 | Esophagogastroduodenoscopy and ligation of duodenal varices                          |
| 9  | 5076641000006113 | Operation on esophageal varices                                                      |
| 10 | 3691651000006110 | Esophagoscopy for injection of esophageal varices                                    |
| 11 | 7329321000006118 | Esophagogastroduodenoscopy and injection of esophageal varices                       |
| 12 |                  |                                                                                      |
| 13 | 2781021000006110 | Bleeding esophageal varices                                                          |
| 14 | 5992721000006114 | Esophageal varices in alcoholic cirrhosis of the liver                               |
| 15 | 4656811000006114 | Fiberoptic esophagoscopy and banding of esophageal varices                           |
| 16 | 5076911000006115 | Sclerotherapy of esophageal varices                                                  |
| 17 | 4656461000006114 | Open operations on esophageal varices                                                |
| 18 | 7329231000006111 | Endoscopy of upper gastrointestinal tract and banding of esophageal varices          |
| 19 | 4657151000006118 | Rigid esophagoscopy and injection sclerotherapy of varices                           |
| 20 |                  |                                                                                      |
| 21 | 2725291000006114 | Esophageal varices without bleeding                                                  |
| 22 | 4779711000006117 | Esophageal varices associated with another disorder                                  |
| 23 | 7328891000006118 | Esophagogastroduodenoscopy and injection of gastric varices                          |
| 24 |                  |                                                                                      |
| 25 | 3691661000006112 | Injection of sclerosing agent into esophageal varices by endoscopy                   |
| 26 | 7516761000006112 | Transgastric plication of esophageal varices                                         |
| 27 | 4656511000006112 | Open injection sclerotherapy to esophageal varices                                   |
| 28 | 5975531000006117 | Esophageal varices in cirrhosis of the liver                                         |
| 29 | 4657391000006114 | Balloon tamponade of esophageal varices                                              |
| 30 |                  |                                                                                      |
| 31 | 2781031000006113 | Esophageal varices with hemorrhage                                                   |
| 32 | 2960621000006118 | Esophageal varices                                                                   |
| 33 | 7329301000006111 | Endoscopy of upper gastrointestinal tract and injection of esophageal varices        |
| 34 | 7329371000006117 | Esophagogastroduodenoscopy and banding of gastric varices                            |
| 35 | 3691671000006117 | Endoscopic injection of esophageal varices                                           |
| 36 |                  |                                                                                      |
| 37 | 4656761000006119 | Fiberoptic esophagoscopy and injection sclerotherapy of varices                      |
| 38 | 4657181000006114 | Rigid esophagoscopy and injection sclerotherapy of varices                           |
| 39 | 2960661000006112 | OV - Esophageal varices                                                              |
| 40 | 7329211000006117 | Esophagogastroduodenoscopy and banding of esophageal varices                         |
| 41 | 7813041000006119 | Downhill varices of esophagus                                                        |
| 42 | 4657161000006116 | Endoscopic injection sclerotherapy to varices of esophagus using rigid esophagoscope |
| 43 |                  |                                                                                      |
| 44 | 303452014        | Biliary cirrhosis of children                                                        |
| 45 | 2475562018       | Malignant neoplasm of interlobular biliary canals                                    |
| 46 | 303453016        | Biliary cirrhosis NOS                                                                |
| 47 | 3010811000006111 | Primary biliary cholangitis                                                          |
| 48 |                  |                                                                                      |
| 49 | 3106821000006112 | Clonorchiasis with biliary cirrhosis                                                 |
| 50 | 4170231000006119 | Obstructive biliary cirrhosis                                                        |
| 51 | 7731531000006110 | Primary biliary cirrhosis co-occurrent with systemic scleroderma                     |
| 52 | 4044018          | Biliary cirrhosis                                                                    |
| 53 | 21289010         | Secondary biliary cirrhosis                                                          |
| 54 |                  |                                                                                      |
| 55 | 52980015         | Primary biliary cirrhosis                                                            |
| 56 | 2526461000006113 | Chronic nonsuppurative destructive cholangitis                                       |
| 57 | 126721013        | Florid cirrhosis                                                                     |
| 58 | 303425016        | Capsular portal cirrhosis                                                            |
| 59 | 396392016        | Juvenile portal cirrhosis                                                            |
| 60 | 451442010        | Oesophageal varices in cirrhosis of the liver                                        |

|    |                  |                                                                      |
|----|------------------|----------------------------------------------------------------------|
| 1  |                  |                                                                      |
| 2  | 493707012        | Hypertrophic portal cirrhosis                                        |
| 3  | 2576980018       | Portal cirrhosis                                                     |
| 4  | 1736361000000112 | Cystic fibrosis related cirrhosis                                    |
| 5  | 123999018        | Congestive cirrhosis                                                 |
| 6  | 396393014        | Non-alcoholic cirrhosis NOS                                          |
| 7  |                  |                                                                      |
| 8  | 55851000006118   | Xanthomatous portal cirrhosis                                        |
| 9  | 2598551000006118 | ICC - Indian childhood cirrhosis                                     |
| 10 | 8242561000006112 | Cirrhosis associated with cystic fibrosis                            |
| 11 | 3713571000006114 | Congestive cirrhosis                                                 |
| 12 |                  |                                                                      |
| 13 | 5524681000006114 | Cirrhosis secondary to cholestasis                                   |
| 14 | 6941931000006112 | Laennec's cirrhosis                                                  |
| 15 | 5493051000006111 | Cirrhosis of liver not due to alcohol                                |
| 16 | 4353661000006114 | Cholangiolitic cirrhosis                                             |
| 17 | 7875311000006114 | Cirrhosis of liver caused by methyl dopa                             |
| 18 | 7518231000006111 | NAIC - North American Indian childhood cirrhosis                     |
| 19 | 7738891000006115 | Idiopathic copper associated cirrhosis of liver                      |
| 20 |                  |                                                                      |
| 21 | 2754821000006111 | Syphilitic cirrhosis                                                 |
| 22 | 7559281000006114 | HMDPC - hypermanganesemia with dystonia, polycythaemia and cirrhosis |
| 23 | 2847631000006117 | Micronodular cirrhosis                                               |
| 24 |                  |                                                                      |
| 25 | 3515305014       | Cirrhosis of liver with primary sclerosing cholangitis               |
| 26 | 3905811000006110 | Postnecrotic cirrhosis                                               |
| 27 | 7868601000006115 | Cardiomyopathy co-occurrent and due to cirrhosis of liver            |
| 28 | 7875301000006111 | Cirrhosis of liver caused by amiodarone                              |
| 29 | 7966981000006110 | Cirrhosis of liver due to chronic hepatitis C                        |
| 30 |                  |                                                                      |
| 31 | 8032261000006117 | Cirrhosis of liver due to hepatitis B                                |
| 32 | 6349661000006117 | Early cirrhosis                                                      |
| 33 | 7043971000006117 | Drug-induced cirrhosis of liver                                      |
| 34 | 7559271000006111 | HMDPC - hypermanganesemia with dystonia, polycythemia and cirrhosis  |
| 35 | 7875291000006110 | Cirrhosis of liver caused by methotrexate                            |
| 36 |                  |                                                                      |
| 37 | 3772081000006115 | Pigment cirrhosis                                                    |
| 38 | 7043981000006119 | Drug-induced hepatic cirrhosis                                       |
| 39 | 6617771000006112 | Bronze cirrhosis                                                     |
| 40 | 5992721000006114 | Esophageal varices in alcoholic cirrhosis of the liver               |
| 41 | 3010831000006117 | Hanot's cirrhosis                                                    |
| 42 | 3713561000006119 | Cardiac cirrhosis                                                    |
| 43 |                  |                                                                      |
| 44 | 476611000006116  | Alcoholic cirrhosis of liver                                         |
| 45 | 2579818016       | Laennec's cirrhosis                                                  |
| 46 | 303438012        | Cardituberculous cirrhosis                                           |
| 47 | 303781011        | [X]Other and unspecified cirrhosis of liver                          |
| 48 |                  |                                                                      |
| 49 | 906081000006114  | [RFC] Cirrhosis                                                      |
| 50 | 353621011        | Laennec's cirrhosis, non-alcoholic                                   |
| 51 | 453265010        | Oesophageal varices in alcoholic cirrhosis of the liver              |
| 52 | 303393017        | Cirrhosis and chronic liver disease                                  |
| 53 | 303414013        | Unilobular portal cirrhosis                                          |
| 54 |                  |                                                                      |
| 55 | 11267010         | Indian childhood cirrhosis                                           |
| 56 | 7743871000006114 | Decompensated cirrhosis of liver                                     |
| 57 | 4355091000006112 | Latent cirrhosis                                                     |
| 58 | 4353651000006112 | Nutritional cirrhosis                                                |
| 59 | 2598561000006116 | Cirrhosis-familial with pulmonary hypertension                       |
| 60 | 2816681000006110 | CL - Cirrhosis of liver                                              |

|    |                  |                                                                           |
|----|------------------|---------------------------------------------------------------------------|
| 1  |                  |                                                                           |
| 2  | 6947471000006110 | Alcoholic liver cirrhosis                                                 |
| 3  | 3206871000006111 | Macronodular cirrhosis                                                    |
| 4  | 226161000006113  | Pipe-stem portal cirrhosis                                                |
| 5  | 303442010        | Portal cirrhosis unspecified                                              |
| 6  | 303439016        | Syphilitic portal cirrhosis                                               |
| 7  | 303518014        | Toxic liver disease with fibrosis and cirrhosis of liver                  |
| 8  | 396390012        | Multilobular portal cirrhosis                                             |
| 9  |                  |                                                                           |
| 10 | 7743881000006112 | Decompensated cirrhosis                                                   |
| 11 | 5087011000006114 | Hypoxia-associated cirrhosis                                              |
| 12 |                  |                                                                           |
| 13 | 603321000006118  | Cryptogenic cirrhosis                                                     |
| 14 | 2935051000006118 | Posthepatic cirrhosis                                                     |
| 15 | 2507081000006119 | Glissonian cirrhosis                                                      |
| 16 | 6883751000006115 | Vandellia cirrhosa                                                        |
| 17 | 3206891000006112 | PNC - Postnecrotic cirrhosis                                              |
| 18 |                  |                                                                           |
| 19 | 2816671000006112 | Hepatic cirrhosis                                                         |
| 20 | 5086991000006115 | Laennec cirrhosis, non-alcoholic                                          |
| 21 | 4787221000006115 | Pipestem portal cirrhosis                                                 |
| 22 | 4787261000006114 | Zooparasitic portal cirrhosis                                             |
| 23 |                  |                                                                           |
| 24 | 550431000006116  | Childhood function cirrhosis                                              |
| 25 | 731231000006114  | Macronodular cirrhosis of liver                                           |
| 26 | 803961000006119  | Glycogenosis with hepatic cirrhosis                                       |
| 27 | 1786709019       | Pigmentary cirrhosis of liver                                             |
| 28 | 303419015        | Diffuse nodular cirrhosis                                                 |
| 29 | 303420014        | Fatty portal cirrhosis                                                    |
| 30 |                  |                                                                           |
| 31 | 303433015        | Pigmentary portal cirrhosis                                               |
| 32 | 303458013        | Portal fibrosis without cirrhosis                                         |
| 33 | 7518221000006113 | North American Indian childhood cirrhosis                                 |
| 34 | 5152271000006110 | Clay pipe-stem cirrhosis                                                  |
| 35 | 221111000000114  | Cirrhosis - non-alcoholic                                                 |
| 36 |                  |                                                                           |
| 37 | 353613017        | Cirrhosis of liver                                                        |
| 38 | 7559261000006116 | Hypermanganesemia with dystonia, polycythemia, and cirrhosis              |
| 39 | 6941941000006119 | PC - Portal cirrhosis                                                     |
| 40 | 2824431000006111 | Progressive neuronal degeneration with liver cirrhosis                    |
| 41 | 3206901000006111 | Multilobar cirrhosis                                                      |
| 42 |                  |                                                                           |
| 43 | 6947461000006115 | Alcoholic cirrhosis                                                       |
| 44 | 2526441000006114 | Cholangitic cirrhosis                                                     |
| 45 | 5975531000006117 | Esophageal varices in cirrhosis of the liver                              |
| 46 | 2753761000006112 | Mixed micro AND macronodular cirrhosis                                    |
| 47 | 6617781000006110 | Bronzed cirrhosis                                                         |
| 48 |                  |                                                                           |
| 49 | 211821000006111  | Postnecrotic cirrhosis of liver                                           |
| 50 | 477604016        | Mixed portal cirrhosis                                                    |
| 51 | 303435010        | Toxic portal cirrhosis                                                    |
| 52 | 3033421000006115 | Parasitic cirrhosis                                                       |
| 53 | 8458711000006115 | Ascites due to alcoholic cirrhosis                                        |
| 54 |                  |                                                                           |
| 55 | 4353641000006110 | Toxic cirrhosis                                                           |
| 56 | 4403611000006113 | Acquired portal-systemic shunt due to cirrhosis                           |
| 57 | 3515307018       | Cirrhosis of liver co-occurrent and due to primary sclerosing cholangitis |
| 58 | 4355101000006118 | Advanced cirrhosis                                                        |
| 59 | 2526451000006111 | Cholestatic cirrhosis                                                     |
| 60 | 5493041000006114 | Cirrhosis, nonalcoholic                                                   |



|    |                   |                                                                                       |
|----|-------------------|---------------------------------------------------------------------------------------|
| 1  |                   |                                                                                       |
| 2  | 1763641000006113  | Cirrhosis of liver due to cystic fibrosis                                             |
| 3  | 303437019         | Bacterial portal cirrhosis                                                            |
| 4  | 303440019         | Zooparasitic portal cirrhosis                                                         |
| 5  | 7559251000006118  | Hypermanganesemia with dystonia, polycythaemia, and cirrhosis                         |
| 6  | 303441015         | Infectious cirrhosis                                                                  |
| 7  |                   |                                                                                       |
| 8  | 4787861000006113  | PSC - Primary sclerosing cholangitis                                                  |
| 9  | 7837331000006113  | Immunoglobulin G4-related sclerosing cholangitis                                      |
| 10 | 5650961000006110  | Human immunodeficiency virus HIV-related sclerosing cholangitis                       |
| 11 | 303617014         | Sclerosing cholangitis                                                                |
| 12 | 5650951000006113  | HIV-related sclerosing cholangitis                                                    |
| 13 | 7837321000006110  | IgG4-related sclerosing cholangitis                                                   |
| 14 | 5650971000006115  | Human immunodeficiency virus-related sclerosing cholangitis                           |
| 15 | 303614019         | Primary sclerosing cholangitis                                                        |
| 16 | 303616017         | Secondary sclerosing cholangitis                                                      |
| 17 |                   |                                                                                       |
| 18 | 2656731000006119  | Chronic lymphocytic cholangitis-cholangiohepatitis                                    |
| 19 | 119489014         | Chronic cholangitis                                                                   |
| 20 |                   |                                                                                       |
| 21 | 8462001000006110  | Chronic cholangitis due to bile duct calculus                                         |
| 22 | 8462031000006119  | Chronic cholangitis due to bile duct calculus with obstruction                        |
| 23 | 95368015          | Chronic lobular hepatitis                                                             |
| 24 | 127487019         | Chronic hepatitis                                                                     |
| 25 | 303404016         | Autoimmune chronic active hepatitis                                                   |
| 26 | 683211000000113   | Chronic hepatitis annual review                                                       |
| 27 | 303409014         | Chronic hepatitis unspecified                                                         |
| 28 | 303410016         | Chronic hepatitis NOS                                                                 |
| 29 | 553311000006111   | Chronic aggressive hepatitis                                                          |
| 30 | 557081000006110   | Chronic viral hepatitis, unspecified                                                  |
| 31 | 3748781000006119  | CH - Chronic hepatitis                                                                |
| 32 | 3507191000006112  | Chronic type B viral hepatitis                                                        |
| 33 | 4787151000006116  | CAH - Chronic aggressive hepatitis                                                    |
| 34 | 8040621000006113  | Cryoglobulinaemia due to chronic hepatitis C                                          |
| 35 | 8040631000006111  | Cryoglobulinemia due to chronic hepatitis C                                           |
| 36 | 12066941000006110 | Chronic hepatitis C caused by Hepatitis C virus genotype 1                            |
| 37 | 5086951000006114  | Drug-induced chronic hepatitis                                                        |
| 38 | 12066921000006115 | Chronic hepatitis C caused by Hepatitis C virus genotype 2                            |
| 39 | 8462251000006117  | Hepatic coma due to chronic hepatic failure                                           |
| 40 | 8467501000006117  | Hepatic ascites co-occurrent with chronic active hepatitis due to toxic liver disease |
| 41 | 7966991000006113  | Chronic hepatitis C with stage 4 fibrosis                                             |
| 42 | 3122251000006114  | Chronic immune tolerant hepatitis B                                                   |
| 43 | 7024461000006115  | Hepatic coma due to chronic hepatitis B                                               |
| 44 | 8047801000006118  | Hepatic coma due to chronic hepatitis B with delta agent                              |
| 45 | 7024441000006119  | Chronic hepatitis B with hepatic coma                                                 |
| 46 | 3312561000006112  | Chronic active type B viral hepatitis                                                 |
| 47 | 7384531000006118  | Chronic hepatitis E                                                                   |
| 48 | 8112141000006113  | Chronic hepatitis C with stage 3 fibrosis                                             |
| 49 | 7024451000006117  | Chronic viral hepatitis B with hepatic coma                                           |
| 50 | 12066931000006117 | Chronic hepatitis C caused by Hepatitis C virus genotype 4                            |
| 51 | 7629961000006118  | Chronic active hepatitis C                                                            |
| 52 | 8462171000006115  | Hepatic ascites due to chronic alcoholic hepatitis                                    |
| 53 | 7583121000006113  | Chronic hepatitis C with stage 2 fibrosis                                             |
| 54 | 3959541000006116  | Chronic aggressive viral hepatitis                                                    |
| 55 |                   |                                                                                       |
| 56 |                   |                                                                                       |
| 57 |                   |                                                                                       |
| 58 |                   |                                                                                       |
| 59 |                   |                                                                                       |
| 60 |                   |                                                                                       |

|    |                   |                                                                        |
|----|-------------------|------------------------------------------------------------------------|
| 1  |                   |                                                                        |
| 2  | 5086841000006119  | Chronic hepatic failure                                                |
| 3  | 4407011000006114  | Chronic type C viral hepatitis                                         |
| 4  | 303401012         | Chronic active hepatitis                                               |
| 5  | 303515012         | Toxic liver disease with chronic persistent hepatitis                  |
| 6  | 69895016          | Chronic persistent hepatitis                                           |
| 7  | 1232261014        | Chronic viral hepatitis B                                              |
| 8  | 5086671000006111  | Chronic non-A non-B hepatitis                                          |
| 9  | 12070031000006113 | Chronic hepatitis C caused by Hepatitis C virus genotype 1b            |
| 10 | 12061231000006118 | Chronic hepatitis C caused by hepatitis C virus genotype 5             |
| 11 | 3475171000006115  | Chronic persistent viral hepatitis                                     |
| 12 | 3587281000006119  | Chronic active viral hepatitis                                         |
| 13 | 2516171000006116  | Chronic aggressive type B viral hepatitis                              |
| 14 | 3514567013        | Chronic viral hepatitis D                                              |
| 15 | 4787131000006111  | CAH - Chronic active hepatitis                                         |
| 16 | 3175071000006117  | CPH - Chronic persistent hepatitis                                     |
| 17 | 303516013         | Toxic liver disease with chronic lobular hepatitis                     |
| 18 | 3122241000006112  | Chronic persistent type B viral hepatitis                              |
| 19 | 288169017         | [X]Other chronic viral hepatitis                                       |
| 20 | 288170016         | [X]Chronic viral hepatitis, unspecified                                |
| 21 | 451124014         | Chronic alcoholic hepatitis                                            |
| 22 | 286879013         | Chronic viral hepatitis B without delta-agent                          |
| 23 | 353580016         | Chronic viral hepatitis B with delta-agent                             |
| 24 | 3514568015        | Chronic infection caused by Hepatitis D virus                          |
| 25 | 12070041000006115 | Chronic hepatitis C caused by Hepatitis C virus genotype 1a            |
| 26 | 12061221000006116 | Chronic hepatitis C caused by hepatitis C virus genotype 6             |
| 27 | 8046451000006115  | Hepatic coma due to chronic hepatitis C                                |
| 28 | 3431801000006116  | CLH - Chronic lobular hepatitis                                        |
| 29 | 17930015          | Chronic viral hepatitis                                                |
| 30 | 5006091000006115  | Chronic hepatocerebral degeneration                                    |
| 31 | 12064771000006114 | Chronic hepatitis C caused by Hepatitis C virus genotype 3             |
| 32 | 7712041000006110  | Occult chronic type B viral hepatitis                                  |
| 33 | 1680591000006117  | Chronic hepatitis annual review - enhanced services admin              |
| 34 | 5086651000006118  | Chronic viral hepatitis B with hepatitis D                             |
| 35 | 303517016         | Toxic liver disease with chronic active hepatitis                      |
| 36 | 557071000006112   | Chronic hepatitis C                                                    |
| 37 | 2146521000000117  | Hepatitis C genotype 4                                                 |
| 38 | 7488601000006110  | Hepatitis C virus genotype 4                                           |
| 39 | 7488591000006119  | Hepatitis C virus genotype 3                                           |
| 40 | 2146501000000114  | Hepatitis C genotype 3                                                 |
| 41 | 3694691000006119  | Hepatogenous chronic copper poisoning                                  |
| 42 | 303389011         | Subacute yellow atrophy                                                |
| 43 | 4786991000006110  | Acute yellow atrophy of liver                                          |
| 44 | 3151011000006114  | Spontaneous abortion with acute yellow atrophy of liver                |
| 45 | 2560711000006114  | Failed attempted abortion with acute yellow atrophy of liver           |
| 46 | 2591941000006117  | Legal abortion with acute yellow atrophy of liver                      |
| 47 | 3975431000006114  | Illegal abortion with acute yellow atrophy of liver                    |
| 48 | 4787101000006115  | Subacute yellow atrophy of liver                                       |
| 49 | 3100831000006113  | Acute yellow atrophy of liver following molar AND/OR ectopic pregnancy |
| 50 | 2619492010        | Acute yellow atrophy                                                   |
| 51 | 3151031000006115  | Miscarriage with acute yellow atrophy of liver                         |
| 52 |                   |                                                                        |
| 53 |                   |                                                                        |
| 54 |                   |                                                                        |
| 55 |                   |                                                                        |
| 56 |                   |                                                                        |
| 57 |                   |                                                                        |
| 58 |                   |                                                                        |
| 59 |                   |                                                                        |
| 60 |                   |                                                                        |



|    |                   |                                                                                       |
|----|-------------------|---------------------------------------------------------------------------------------|
| 1  |                   |                                                                                       |
| 2  | 3636591000006115  | Acute yellow atrophy of liver during pregnancy                                        |
| 3  | 7840451000006111  | Idiopathic granulomatous hepatitis                                                    |
| 4  | 303787010         | [X]Granulomatous hepatitis, not elsewhere classified                                  |
| 5  | 806841000006117   | Granulomatous hepatitis                                                               |
| 6  | 293605014         | Alpha-1-antitrypsin hepatitis                                                         |
| 7  | 287866013         | Hepatitis in toxoplasmosis                                                            |
| 8  | 2780581000006113  | Hepatitis caused by acquired toxoplasmosis                                            |
| 9  | 2780571000006110  | Hepatitis due to acquired toxoplasmosis                                               |
| 10 | 287865012         | Toxoplasma hepatitis                                                                  |
| 11 | 353587018         | Alcoholic hepatitis                                                                   |
| 12 | 353595019         | Alcoholic hepatic failure                                                             |
| 13 | 7266931000006113  | NASH - Nonalcoholic steatohepatitis                                                   |
| 14 | 8458751000006119  | Ascites due to alcoholic hepatitis                                                    |
| 15 | 12031691000006112 | Alcoholic steatohepatitis                                                             |
| 16 | 2819666013        | Nonalcoholic steatohepatitis                                                          |
| 17 | 5086741000006114  | AH - Alcoholic hepatitis                                                              |
| 18 | 303388015         | Subacute hepatic failure                                                              |
| 19 | 3678071000006110  | Subacute noninfective hepatitis                                                       |
| 20 | 8467451000006119  | Coma due to subacute hepatic failure                                                  |
| 21 | 122921000006118   | Subacute hepatitis - noninfective                                                     |
| 22 | 4787061000006118  | Subacute hepatic necrosis                                                             |
| 23 | 7837261000006114  | Subacute hepatic failure caused by hepatitis virus                                    |
| 24 | 3678081000006113  | Subacute non-infective hepatitis                                                      |
| 25 | 353567019         | Nonspecific reactive hepatitis                                                        |
| 26 | 303456012         | Chronic nonalcoholic liver disease                                                    |
| 27 | 2159899016        | Autoimmune hepatitis                                                                  |
| 28 | 7821651000006119  | Autoimmune hepatitis type 1                                                           |
| 29 | 7821671000006112  | Autoimmune hepatitis type 3                                                           |
| 30 | 7821661000006117  | Autoimmune hepatitis type 2                                                           |
| 31 | 303507014         | Toxic hepatitis                                                                       |
| 32 | 1488891017        | Hepatitis C viral load                                                                |
| 33 | 2118321000000118  | Hepatitis C antigen positive                                                          |
| 34 | 8234961000006111  | Hepatitis C viral RNA PCR (ribonucleic acid polymerase chain reaction) positive       |
| 35 | 7488571000006115  | Hepatitis C virus genotype 1                                                          |
| 36 | 7488531000006118  | Hepatitis C virus subtype 3b                                                          |
| 37 | 7819901000006118  | Hepatitis caused by sexually transmissible virus                                      |
| 38 | 7488511000006112  | Hepatitis C virus subtype 2b                                                          |
| 39 | 6590751000006113  | Hepatitis C virus genotype determination                                              |
| 40 | 3523221000006115  | Hepatitis C virus                                                                     |
| 41 | 4332061000006113  | Hepatitis C virus ribosomal ribonucleic acid                                          |
| 42 | 6349691000006113  | Polymerase chain reaction positive for hepatitis C viral ribonucleic acid genotype 1A |
| 43 | 7488541000006111  | Hepatitis C virus subtype 5a                                                          |
| 44 | 8332921000006116  | Hepatitis C targeted genetic test                                                     |
| 45 | 7488521000006116  | Hepatitis C virus subtype 3a                                                          |
| 46 | 6280591000006117  | Finding of Hepatitis C status                                                         |
| 47 | 12618221000006116 | Hepatitis C screening - infected with hepatitis C virus                               |
| 48 | 7488501000006114  | Hepatitis C virus subtype 2a                                                          |
| 49 | 4332051000006111  | Hepatitis C virus rRNA                                                                |
| 50 | 4332421000006110  | Hepatitis C virus RNA                                                                 |
| 51 | 7488641000006112  | Hepatitis C virus subtype 2c                                                          |
| 52 |                   |                                                                                       |
| 53 |                   |                                                                                       |
| 54 |                   |                                                                                       |
| 55 |                   |                                                                                       |
| 56 |                   |                                                                                       |
| 57 |                   |                                                                                       |
| 58 |                   |                                                                                       |
| 59 |                   |                                                                                       |
| 60 |                   |                                                                                       |

|    |                   |                                                                                           |
|----|-------------------|-------------------------------------------------------------------------------------------|
| 1  |                   |                                                                                           |
| 2  | 185065013         | Hepatitis C virus RNA (ribonucleic acid) assay                                            |
| 3  | 286871011         | Viral hepatitis C                                                                         |
| 4  | 8368021000006111  | Hepatitis C cryoglobulinaemic vasculitis                                                  |
| 5  | 7488561000006110  | Hepatitis C virus subtype 4a                                                              |
| 6  | 1739601000000111  | Hepatitis C PCR positive                                                                  |
| 7  |                   |                                                                                           |
| 8  | 7686921000006114  | Polymerase chain reaction test for Hepatitis C positive                                   |
| 9  | 1766481000006112  | Hepatitis C viral ribonucleic acid polymerase chain reaction positive                     |
| 10 | 7488621000006117  | Hepatitis C virus genotype 6                                                              |
| 11 | 7488481000006116  | Hepatitis C virus subtype 1a                                                              |
| 12 |                   |                                                                                           |
| 13 | 7488551000006113  | Hepatitis C virus subtype 6a                                                              |
| 14 | 6347341000006116  | Hepatitis C antibody positive with elevated alanine transaminase                          |
| 15 | 7488651000006114  | Hepatitis C virus subtype 4b                                                              |
| 16 | 7488681000006118  | Hepatitis C virus subtype 4e                                                              |
| 17 | 5189141000006113  | Genus: Hepatitis C virus group                                                            |
| 18 | 683911000000119   | Hepatitis C screening positive                                                            |
| 19 |                   |                                                                                           |
| 20 | 7488671000006116  | Hepatitis C virus subtype 4d                                                              |
| 21 | 6552441000006110  | Hepatitis C viral load                                                                    |
| 22 | 4743991000006113  | Hepatitis C virus measurement                                                             |
| 23 | 8368011000006115  | Hepatitis C virus-associated cryoglobulinaemic vasculitis                                 |
| 24 |                   |                                                                                           |
| 25 | 7488491000006118  | Hepatitis C virus subtype 1b                                                              |
| 26 | 7568861000006119  | Reactivation of hepatitis C viral hepatitis                                               |
| 27 | 5619351000006114  | Congenital hepatitis C infection                                                          |
| 28 | 2146441000000113  | Hepatitis C genotype 1                                                                    |
| 29 |                   |                                                                                           |
| 30 | 1761251000006111  | [SHHAPT] Viral hepatitis C - first diagnosis                                              |
| 31 | 7488631000006119  | Hepatitis C virus subtype 1c                                                              |
| 32 | 6590761000006110  | Hepatitis C virus genotype                                                                |
| 33 | 7488581000006117  | Hepatitis C virus genotype 2                                                              |
| 34 | 8037721000006115  | Glomerulonephritis due to hepatitis C                                                     |
| 35 |                   |                                                                                           |
| 36 | 7263471000006113  | Hepatitis B and hepatitis C                                                               |
| 37 | 12031701000006112 | Steatohepatitis caused by ingestible alcohol                                              |
| 38 | 6349671000006112  | PCR positive for hepatitis C viral RNA (genotype 1A)                                      |
| 39 | 1786403019        | Hepatitis C nucleic acid detection                                                        |
| 40 | 286868015         | Viral hepatitis C with coma                                                               |
| 41 | 6349681000006110  | Polymerase chain reaction (PCR) positive for hepatitis C viral ribonucleic acid (genotype |
| 42 |                   |                                                                                           |
| 43 | 4332431000006113  | Hepatitis C virus ribonucleic acid                                                        |
| 44 | 7488611000006113  | Hepatitis C virus genotype 5                                                              |
| 45 | 6347331000006114  | Hepatitis C seropositive with elevated ALT                                                |
| 46 | 8266261000006115  | Hepatitis C virus genotype determination by ribonucleic acid analysis                     |
| 47 | 6347321000006111  | Hepatitis C antibody positive with elevated ALT                                           |
| 48 |                   |                                                                                           |
| 49 | 2146461000000114  | Hepatitis C genotype 2                                                                    |
| 50 | 2146541000000112  | Hepatitis C genotype 5                                                                    |
| 51 | 2146561000000113  | Hepatitis C genotype 6                                                                    |
| 52 | 1676391000006116  | Hepatitis C PCR positive                                                                  |
| 53 | 994021000006115   | Hepatitis C positive                                                                      |
| 54 |                   |                                                                                           |
| 55 | 1783609017        | Hepatitis C virus genotype                                                                |
| 56 | 84516016          | Hepatitis C                                                                               |
| 57 | 3523231000006117  | HCV - Hepatitis C virus                                                                   |
| 58 | 7488661000006111  | Hepatitis C virus subtype 4c                                                              |
| 59 | 287970018         | Sequelae of viral hepatitis                                                               |
| 60 | 426451000006118   | [X]Sequelae of viral hepatitis                                                            |

|    |                  |                                                              |
|----|------------------|--------------------------------------------------------------|
| 1  |                  |                                                              |
| 2  | 1850901000006115 | Reason for influenza vaccine - chronic liver disease         |
| 3  | 303489012        | Liver abscess and chronic liver disease causing sequelae NOS |
| 4  | 7300021000006118 | Sequela of chronic liver disease                             |
| 5  | 7700651000006119 | Chronic alcoholic liver disease                              |
| 6  | 7703061000006115 | Acute on chronic alcoholic liver disease                     |
| 7  |                  |                                                              |
| 8  | 303465017        | Chronic liver disease                                        |
| 9  | 396394015        | Other sequelae of chronic liver disease                      |
| 10 | 303464018        | Other non-alcoholic chronic liver disease NOS                |
| 11 | 303466016        | Liver abscess and sequelae of chronic liver disease          |
| 12 |                  |                                                              |
| 13 | b18              | chronic viral hepatitis                                      |
| 14 | b18.0            | chronic viral hepatitis b with delta-agent                   |
| 15 | b18.1            | chronic viral hepatitis b without delta-agent                |
| 16 | b18.2            | chronic viral hepatitis c                                    |
| 17 | b18.8            | other chronic viral hepatitis                                |
| 18 | b18.9            | chronic viral hepatitis, unspecified                         |
| 19 |                  |                                                              |
| 20 | k70              | alcoholic liver disease                                      |
| 21 | k70.1            | alcoholic hepatitis                                          |
| 22 | k70.2            | alcoholic fibrosis and sclerosis of liver                    |
| 23 | k70.3            | alcoholic cirrhosis of liver                                 |
| 24 |                  |                                                              |
| 25 | k70.9            | alcoholic hepatic failure                                    |
| 26 | k70.9            | alcoholic liver disease, unspecified                         |
| 27 | k71              | toxic liver disease                                          |
| 28 | k71.0            | toxic liver disease with cholestasis                         |
| 29 | k71.3            | toxic liver disease with chronic persistent hepatitis        |
| 30 | k71.4            | toxic liver disease with chronic lobular hepatitis           |
| 31 | k71.5            | toxic liver disease with chronic active hepatitis            |
| 32 | k71.6            | toxic liver disease with hepatitis, not elsewhere classified |
| 33 | k71.7            | toxic liver disease with fibrosis and cirrhosis of liver     |
| 34 |                  |                                                              |
| 35 | k72.1            | chronic hepatic failure                                      |
| 36 | k72.9            | hepatic failure, unspecified                                 |
| 37 |                  |                                                              |
| 38 | k73              | chronic hepatitis, not elsewhere classified                  |
| 39 | k73.0            | chronic lobular hepatitis, not elsewhere classified          |
| 40 | k73.1            | chronic active hepatitis, not elsewhere classified           |
| 41 | k73.2            | chronic active hepatitis, not elsewhere classified           |
| 42 |                  |                                                              |
| 43 | k73.8            | other chronic hepatitis, not elsewhere classified"           |
| 44 | k73.9            | chronic hepatitis, unspecified                               |
| 45 | k74.0            | hepatic fibrosis                                             |
| 46 | k74.1            | hepatic sclerosis                                            |
| 47 | k74.2            | hepatic fibrosis with hepatic sclerosis                      |
| 48 |                  |                                                              |
| 49 | k74.3            | primary biliary cirrhosis                                    |
| 50 | k74.4            | secondary biliary cirrhosis                                  |
| 51 | k74.5            | biliary cirrhosis, unspecified                               |
| 52 | k74.6            | other and unspecified cirrhosis of liver                     |
| 53 | k75              | other inflammatory liver diseases                            |
| 54 | k75.3            | granulomatous hepatitis, not elsewhere classified            |
| 55 | k75.4            | autoimmune hepatitis                                         |
| 56 | k75.9            | inflammatory liver disease, unspecified                      |
| 57 |                  |                                                              |
| 58 | k76              | other diseases of liver                                      |
| 59 | k76.1            | chronic passive congestion of liver                          |
| 60 | k76.3            | infarction of liver                                          |

|    |                   |                                                                           |
|----|-------------------|---------------------------------------------------------------------------|
| 1  |                   |                                                                           |
| 2  | k76.4             | peliosis hepatitis                                                        |
| 3  | k76.5             | hepatic veno-occlusive disease                                            |
| 4  | k76.6             | portal hypertension                                                       |
| 5  | k76.7             | hepatorenal syndrome                                                      |
| 6  | k76.8             | other specified diseases of liver                                         |
| 7  | k76.9             | liver disease, unspecified                                                |
| 8  |                   |                                                                           |
| 9  | 270232016         | Replacement of previous liver transplant                                  |
| 10 | 31211000006119    | Orthotopic transplantation of liver                                       |
| 11 | 225661000006111   | Piggy back liver transplant                                               |
| 12 | 3527364013        | Transplanted liver present                                                |
| 13 | 3532180010        | Liver transplant recipient                                                |
| 14 |                   |                                                                           |
| 15 | 12458801000006116 | [V]Liver transplanted                                                     |
| 16 | 2786021000006116  | LTx - Liver transplant                                                    |
| 17 | 2786001000006114  | Tx - Liver transplantation                                                |
| 18 |                   |                                                                           |
| 19 | 4661791000006112  | Piggy-back liver transplant                                               |
| 20 | 2560511000006119  | Structure of transplanted liver                                           |
| 21 | 8030371000006119  | Aftercare for liver transplant done                                       |
| 22 | 5161091000006119  | Ultrasound scan of transplant liver                                       |
| 23 | 5087211000006119  | Liver transplant rejection                                                |
| 24 |                   |                                                                           |
| 25 | 7566431000006113  | Liver transplant recipient                                                |
| 26 | 7170221000006110  | Chronic rejection of liver transplant                                     |
| 27 | 3033691000006115  | Complication of transplanted liver                                        |
| 28 | 2949531000006115  | Liver transplant without recipient hepatectomy                            |
| 29 | 8325471000006118  | Fluoroscopic angiography of transplanted liver                            |
| 30 | 5087221000006110  | Liver transplant failure                                                  |
| 31 |                   |                                                                           |
| 32 | 8293001000006116  | Living donor liver transplantation                                        |
| 33 | 8325851000006114  | CT of transplanted liver                                                  |
| 34 | 8325771000006113  | Ultrasound guided biopsy of transplanted liver                            |
| 35 | 8450901000006118  | Pretransplant evaluation of liver recipient                               |
| 36 | 3973131000006117  | Anesthesia for liver transplant                                           |
| 37 |                   |                                                                           |
| 38 | 8325881000006118  | Fluoroscopy guided percutaneous transjugular biopsy of transplanted liver |
| 39 | 4661761000006116  | Orthotopic transplantation of liver                                       |
| 40 | 270234015         | Transplantation of liver NOS                                              |
| 41 | 2676200013        | Orthotopic transplantation of whole liver                                 |
| 42 |                   |                                                                           |
| 43 | 7767241000006119  | Doppler ultrasound of transplanted liver                                  |
| 44 | 7167121000006113  | Hyperacute rejection of liver transplant                                  |
| 45 | 11910741000006116 | [V]Liver transplanted                                                     |
| 46 | 822591000006117   | Heterotopic liver transplant                                              |
| 47 | 30458014          | Transplantation of liver                                                  |
| 48 |                   |                                                                           |
| 49 | 3973121000006115  | Anaesthesia for liver transplant                                          |
| 50 | 7767231000006112  | Doppler ultrasound scan of transplanted liver                             |
| 51 | 460651015         | Transplanted liver present                                                |
| 52 | 8325791000006114  | MRI angiogram of transplanted liver                                       |
| 53 | 7167181000006112  | Accelerated rejection of liver transplant                                 |
| 54 |                   |                                                                           |
| 55 | 7767221000006114  | Doppler ultrasonography of transplanted liver                             |
| 56 | 7565141000006116  | Doppler ultrasound of transplant liver                                    |
| 57 | 4661751000006118  | Orthotopic liver transplant                                               |
| 58 | 500401000006116   | Auxillary liver transplant                                                |
| 59 | 270233014         | Other specified transplantation of liver                                  |
| 60 | 2560521000006110  | Transplanted liver                                                        |

|    |                  |                                                      |
|----|------------------|------------------------------------------------------|
| 1  |                  |                                                      |
| 2  | 8325761000006118 | Ultrasonography guided biopsy of transplanted liver  |
| 3  | 8325871000006116 | CT guided biopsy of transplanted liver               |
| 4  | 8325481000006115 | Fluoroscopic angiogram of transplanted liver         |
| 5  | 5538541000006110 | Entire transplanted liver                            |
| 6  | 376141000000113  | Orthotopic transplantation of liver NEC              |
| 7  |                  |                                                      |
| 8  | 864281000006116  | Liver transplant                                     |
| 9  | 324976011        | Liver transplant failure and rejection               |
| 10 | 2937111000006111 | Liver transplant with recipient hepatectomy          |
| 11 | 8325861000006111 | CT of transplanted liver with contrast               |
| 12 |                  |                                                      |
| 13 | 8325781000006111 | Magnetic resonance angiography of transplanted liver |
| 14 | 8325891000006115 | MRI of transplanted liver                            |
| 15 | 5161081000006117 | US scan of transplant liver                          |
| 16 | 7133411000006113 | Acute rejection of liver transplant                  |
| 17 | 8325571000006119 | Fluoroscopic angioplasty of transplanted liver       |
| 18 |                  |                                                      |
| 19 | 4661781000006114 | Auxiliary liver transplant                           |
| 20 | 739931000006118  | Liver transplant with complication                   |
| 21 | 8293011000006118 | Live donor liver transplant                          |
| 22 | 5087201000006117 | Liver transplant disorder                            |
| 23 | 251929017        | H/O: liver recipient                                 |
| 24 | 4542661000006117 | History of liver recipient                           |
| 25 |                  |                                                      |
| 26 | 2786011000006112 | Hepatic transplantation                              |
| 27 |                  |                                                      |
| 28 |                  |                                                      |
| 29 |                  |                                                      |
| 30 |                  |                                                      |
| 31 |                  |                                                      |
| 32 |                  |                                                      |
| 33 |                  |                                                      |
| 34 |                  |                                                      |
| 35 |                  |                                                      |
| 36 |                  |                                                      |
| 37 |                  |                                                      |
| 38 |                  |                                                      |
| 39 |                  |                                                      |
| 40 |                  |                                                      |
| 41 |                  |                                                      |
| 42 |                  |                                                      |
| 43 |                  |                                                      |
| 44 |                  |                                                      |
| 45 |                  |                                                      |
| 46 |                  |                                                      |
| 47 |                  |                                                      |
| 48 |                  |                                                      |
| 49 |                  |                                                      |
| 50 |                  |                                                      |
| 51 |                  |                                                      |
| 52 |                  |                                                      |
| 53 |                  |                                                      |
| 54 |                  |                                                      |
| 55 |                  |                                                      |
| 56 |                  |                                                      |
| 57 |                  |                                                      |
| 58 |                  |                                                      |
| 59 |                  |                                                      |
| 60 |                  |                                                      |

1  
2  
3  
4  
5  
6  
7  
8  
9  
10  
11  
12  
13  
14  
15  
16  
17  
18  
19  
20  
21  
22  
23  
24  
25  
26  
27  
28  
29  
30  
31  
32  
33  
34  
35  
36  
37  
38  
39  
40  
41  
42  
43  
44  
45  
46  
47  
48  
49  
50  
51  
52  
53  
54  
55  
56  
57  
58  
59  
60

For peer review only

1  
2  
3  
4  
5  
6  
7  
8  
9  
10  
11  
12  
13  
14  
15  
16  
17  
18  
19  
20  
21  
22  
23  
24  
25  
26  
27  
28  
29  
30  
31  
32  
33  
34  
35  
36  
37  
38  
39  
40  
41  
42  
43  
44  
45  
46  
47  
48  
49  
50  
51  
52  
53  
54  
55  
56  
57  
58  
59  
60

e

For peer review only

1  
2  
3  
4  
5  
6  
7  
8  
9  
10  
11  
12  
13  
14  
15  
16  
17  
18  
19  
20  
21  
22  
23  
24  
25  
26  
27  
28  
29  
30  
31  
32  
33  
34  
35  
36  
37  
38  
39  
40  
41  
42  
43  
44  
45  
46  
47  
48  
49  
50  
51  
52  
53  
54  
55  
56  
57  
58  
59  
60

For peer review only



1  
2  
3  
4  
5  
6  
7  
8  
9  
10  
11  
12  
13  
14  
15  
16  
17  
18  
19  
20  
21  
22  
23  
24  
25  
26  
27  
28  
29  
30  
31  
32  
33  
34  
35  
36  
37  
38  
39  
40  
41  
42  
43  
44  
45  
46  
47  
48  
49  
50  
51  
52  
53  
54  
55  
56  
57  
58  
59  
60

For peer review only

1  
2  
3  
4  
5  
6  
7  
8  
9  
10  
11  
12  
13  
14  
15  
16  
17  
18  
19  
20  
21  
22  
23  
24  
25  
26  
27  
28  
29  
30  
31  
32  
33  
34  
35  
36  
37  
38  
39  
40  
41  
42  
43  
44  
45  
46  
47  
48  
49  
50  
51  
52  
53  
54  
55  
56  
57  
58  
59  
60

For peer review only

1  
2  
3  
4  
5  
6  
7  
8  
9  
10  
11  
12  
13  
14  
15  
16  
17  
18  
19  
20  
21  
22  
23  
24  
25  
26  
27  
28  
29  
30  
31  
32  
33  
34  
35  
36  
37  
38  
39  
40  
41  
42  
43  
44  
45  
46  
47  
48  
49  
50  
51  
52  
53  
54  
55  
56  
57  
58  
59  
60

For peer review only

1  
2  
3  
4  
5  
6  
7  
8  
9  
10  
11  
12  
13  
14  
15  
16  
17  
18  
19  
20  
21  
22  
23  
24  
25  
26  
27  
28  
29  
30  
31  
32  
33  
34  
35  
36  
37  
38  
39  
40  
41  
42  
43  
44  
45  
46  
47  
48  
49  
50  
51  
52  
53  
54  
55  
56  
57  
58  
59  
60

For peer review only

1  
2  
3  
4  
5  
6  
7  
8  
9  
10  
11  
12  
13  
14  
15  
16  
17  
18  
19  
20  
21  
22  
23  
24  
25  
26  
27  
28  
29  
30  
31  
32  
33  
34  
35  
36  
37  
38  
39  
40  
41  
42  
43  
44  
45  
46  
47  
48  
49  
50  
51  
52  
53  
54  
55  
56  
57  
58  
59  
60

For peer review only

1  
2  
3  
4  
5  
6  
7  
8  
9  
10  
11  
12  
13  
14  
15  
16  
17  
18  
19  
20  
21  
22  
23  
24  
25  
26  
27  
28  
29  
30  
31  
32  
33  
34  
35  
36  
37  
38  
39  
40  
41  
42  
43  
44  
45  
46  
47  
48  
49  
50  
51  
52  
53  
54  
55  
56  
57  
58  
59  
60

For peer review only

: 1A)

|    |             |                                           |
|----|-------------|-------------------------------------------|
| 1  |             |                                           |
| 2  | ICD-10 code | Term                                      |
| 3  | J01         | Transplantation of liver                  |
| 4  | J01.1       | ORTHOTOPIC TRANSPLANTATION OF LIVER NEC   |
| 5  | J01.2       | HETEROTOPIC TRANSPLANTATION OF LIVER      |
| 6  | J01.3       | REPLACEMENT OF PREVIOUS LIVER TRANSPLANT  |
| 7  | J01.4       | TRANSPLANTATION OF LIVER CELLS            |
| 8  | J01.5       | ORTHOTOPIC TRANSPLANTATION OF WHOLE LIVER |
| 9  | J01.8       | OTHER SPECIFIED                           |
| 10 | J01.9       | UNSPECIFIED                               |
| 11 |             |                                           |
| 12 |             |                                           |
| 13 |             |                                           |
| 14 |             |                                           |
| 15 |             |                                           |
| 16 |             |                                           |
| 17 |             |                                           |
| 18 |             |                                           |
| 19 |             |                                           |
| 20 |             |                                           |
| 21 |             |                                           |
| 22 |             |                                           |
| 23 |             |                                           |
| 24 |             |                                           |
| 25 |             |                                           |
| 26 |             |                                           |
| 27 |             |                                           |
| 28 |             |                                           |
| 29 |             |                                           |
| 30 |             |                                           |
| 31 |             |                                           |
| 32 |             |                                           |
| 33 |             |                                           |
| 34 |             |                                           |
| 35 |             |                                           |
| 36 |             |                                           |
| 37 |             |                                           |
| 38 |             |                                           |
| 39 |             |                                           |
| 40 |             |                                           |
| 41 |             |                                           |
| 42 |             |                                           |
| 43 |             |                                           |
| 44 |             |                                           |
| 45 |             |                                           |
| 46 |             |                                           |
| 47 |             |                                           |
| 48 |             |                                           |
| 49 |             |                                           |
| 50 |             |                                           |
| 51 |             |                                           |
| 52 |             |                                           |
| 53 |             |                                           |
| 54 |             |                                           |
| 55 |             |                                           |
| 56 |             |                                           |
| 57 |             |                                           |
| 58 |             |                                           |
| 59 |             |                                           |
| 60 |             |                                           |

For peer review only

|    |           |
|----|-----------|
| 1  |           |
| 2  | Medcodeid |
| 3  | 11300012  |
| 4  | 23820010  |
| 5  | 73622018  |
| 6  | 148427014 |
| 7  | 178739011 |
| 8  | 251269010 |
| 9  | 251644018 |
| 10 | 264629018 |
| 11 | 264630011 |
| 12 | 264631010 |
| 13 | 264634019 |
| 14 | 264637014 |
| 15 | 264638016 |
| 16 | 264639012 |
| 17 | 264640014 |
| 18 | 264645016 |
| 19 | 297266016 |
| 20 | 297267013 |
| 21 | 297281010 |
| 22 | 297282015 |
| 23 | 297283013 |
| 24 | 297284019 |
| 25 | 297289012 |
| 26 | 297290015 |
| 27 | 297295013 |
| 28 | 297296014 |
| 29 | 297300010 |
| 30 | 297302019 |
| 31 | 297303012 |
| 32 | 297311019 |
| 33 | 297312014 |
| 34 | 297313016 |
| 35 | 297314010 |
| 36 | 297315011 |
| 37 | 297321010 |
| 38 | 297324019 |
| 39 | 297325018 |
| 40 | 297330019 |
| 41 | 299334015 |
| 42 | 299336018 |
| 43 | 299337010 |
| 44 | 299345017 |
| 45 | 345225017 |
| 46 | 345275015 |
| 47 | 345311015 |
| 48 | 345318014 |
| 49 | 345321011 |
| 50 | 345323014 |
| 51 | 345345010 |

For peer review only



1  
2 399395015  
3 399408014  
4 450602015  
5 450603013  
6 453344019  
7 459233015  
8 459234014  
9 472410017  
10 472411018  
11 477355017  
12 478024019  
13 495804010  
14 500033015  
15 512000013  
16 1489345013  
17 1780267013  
18 1780375016  
19 2159216019  
20 2159223018  
21 2159225013  
22 2159227017  
23 2159274014  
24 2474650018  
25 2478828012  
26 2533403014  
27 2548491016  
28 2550890017  
29 2692343011  
30 3506708010  
31 3511291019  
32 10791000006116  
33 103531000006110  
34 125721000006111  
35 137801000000112  
36 138671000000116  
37 138681000000119  
38 138691000000117  
39 138701000000117  
40 139021000000118  
41 139161000000110  
42 141981000000118  
43 141991000000116  
44 142041000000115  
45 142051000000117  
46 148591000006114  
47 154851000000115  
48 166001000000113  
49 223811000000118  
50 230321000006117  
51 245341000006117

For peer review only

1  
2 245351000006115  
3 245361000006118  
4 301541000000116  
5 307861000000113  
6 307881000000116  
7 307901000000118  
8 362161000006110  
9 363451000006114  
10 379901000006113  
11 405571000006113  
12 406781000000119  
13 425631000006118  
14 647301000006112  
15 736371000006112  
16 743461000006119  
17 800721000006115  
18 851121000006117  
19 883041000006118  
20 897431000006113  
21 905881000006111  
22 916571000006117  
23 918541000006112  
24 918551000006114  
25 918561000006111  
26 918591000006115  
27 918601000006111  
28 931251000006112  
29 931711000006118  
30 1013171000006112  
31 1013181000006110  
32 1013191000006113  
33 1175991000000119  
34 1176031000000114  
35 1176071000000111  
36 1176241000000114  
37 1176301000000117  
38 1176341000000119  
39 1176381000000110  
40 1673671000006116  
41 1699591000006112  
42 1699611000006118  
43 1741271000006111  
44 1741281000006114  
45 1776671000006116  
46 1855731000006116  
47 1855741000006114  
48 1855761000006113  
49 1856761000006115  
50 1856771000006110  
51 1856781000006113

For peer review only

1  
2 1856791000006111  
3 1932071000006116  
4 1986841000006113  
5 2014871000006119  
6 2112801000000117  
7  
8 2297411000000115  
9 2444841000000117  
10 2466801000000118  
11 2502351000006114  
12 2502391000006115  
13 2587911000000119  
14 2589101000000111  
15 2612111000006116  
16 2612121000006112  
17 2721471000006114  
18 2811081000006110  
19 3093151000006111  
20 3093161000006113  
21 3093171000006118  
22 3210941000006113  
23 3210951000006110  
24 3323851000006114  
25 3668321000006119  
26 3668331000006116  
27 3668341000006114  
28 3719651000006117  
29 3719661000006115  
30 3759931000006112  
31 3796891000006117  
32 3796901000006118  
33 3878481000006113  
34 3878491000006111  
35 3878501000006115  
36 4052921000006118  
37 4540141000006110  
38 4755771000006114  
39 4769541000006119  
40 4769611000006117  
41 4769641000006118  
42 4948491000006116  
43 5007101000006111  
44 5007121000006118  
45 5007131000006115  
46 5007171000006117  
47 5007261000006117  
48 5007321000006116  
49 5007351000006113  
50 5007361000006110  
51 5007541000006119  
52 5007551000006117

For peer review only

1 5007621000006113  
2 5007661000006119  
3 5007771000006116  
4 5007781000006118  
5 5007811000006116  
6 5007871000006113  
7 5007941000006110  
8 5007971000006119  
9 5008031000006115  
10 5008101000006110  
11 5008211000006119  
12 5008231000006113  
13 5023531000006114  
14 5067711000006114  
15 5192381000006111  
16 5300251000006119  
17 5300261000006117  
18 5300371000006115  
19 5614161000006114  
20 6028641000006114  
21 6369851000006112  
22 6908751000006116  
23 6997451000006113  
24 7069151000006119  
25 7220531000006114  
26 7265381000006118  
27 7306821000006113  
28 7306831000006111  
29 7512471000006111  
30 7758091000006113  
31 7840671000006115  
32 7861341000006115  
33 7863641000006114  
34 7863681000006115  
35 7952761000006111  
36 7955181000006111  
37 8024691000006119  
38 8025071000006110  
39 8029441000006110  
40 8031611000006111  
41 8053261000006111  
42 8056521000006114  
43 8079791000006114  
44 8089731000006115  
45 8191681000006117  
46 8214791000006114  
47 8259581000006110  
48 8260981000006117  
49 8289731000006113  
50 8289831000006117

For peer review only

1 8289881000006116  
2 8313881000006113  
3 11639661000006111  
4 11831381000006119  
5 12076991000006114  
6 13491221000006117  
7 13493091000006112  
8 13493111000006115  
9 13493431000006116  
10 13495041000006116  
11 13499471000006116  
12 13500261000006114  
13 13503061000006114  
14 13572191000006116  
15 13572931000006117  
16 13573141000006116  
17 13622561000006113  
18 13632801000006112  
19 13637841000006111  
20 13686241000006115  
21 13686271000006111  
22 13950881000006118  
23 14055041000006118  
24 300366019  
25 449935012  
26 451371010  
27 1212072018  
28 1227591017  
29 2474330011  
30 2476091017  
31 2548554013  
32 3509817019  
33 3521990012  
34 138981000000113  
35 139081000000117  
36 139091000000115  
37 149571000006118  
38 162111000000112  
39 306621000000116  
40 371641000000112  
41 426321000006116  
42 524511000006116  
43 907581000006119  
44 907591000006116  
45 908801000006114  
46 928621000006111  
47 966981000006112  
48 968341000006116  
49 1716631000000115  
50 1757281000006116

For peer review only

1  
2 1784651000006110  
3 1863321000006113  
4 1992451000006114  
5 1994761000006112  
6 2008521000006110  
7  
8 2008601000006116  
9 2901571000006113  
10 3142511000006112  
11 4057041000006110  
12 4193641000006111  
13 5011071000006114  
14 5011081000006112  
15 5011111000006118  
16 5011121000006114  
17 5011141000006119  
18 5011461000006111  
19 5011471000006116  
20 5011871000006119  
21 5960821000006117  
22 5960951000006117  
23 5960971000006110  
24 6348291000006115  
25 6348301000006119  
26 6349401000006115  
27 6837051000006119  
28 6846141000006118  
29 6990981000006114  
30 6990991000006112  
31 7071911000006114  
32 7703601000006113  
33 7855631000006111  
34 7861341000006115  
35 8014911000006110  
36 8026451000006117  
37 8044481000006118  
38 8196061000006110  
39 8264201000006110  
40 8265471000006116  
41 8453031000006117  
42 8453821000006113  
43 9912271000006112  
44 13718641000006112  
45 13909861000006114  
46 13909881000006116  
47 13909891000006118  
48 13909901000006119  
49 14182621000006113  
50 14194161000006118  
51 14194651000006114  
52 14194811000006114

For peer review only

1  
2 264499015  
3 411416011  
4 413750011  
5 3508956015  
6 3508962013  
7 3508965010  
8 3516948016  
9  
10 122361000006113  
11 122401000006115  
12 884521000006115  
13 884531000006117  
14 940051000006114  
15 940061000006111  
16 940071000006116  
17 940081000006118  
18 1160471000000111  
19 1682791000006112  
20 1726581000006116  
21 2115821000000118  
22 2118011000000114  
23 2126181000000114  
24 2127781000000110  
25 2539131000006116  
26 5010981000006119  
27 5011451000006114  
28 5866391000006119  
29 5866401000006117  
30 7568281000006111  
31 7597121000006117  
32 7618821000006118  
33 8195431000006118  
34 8274811000006116  
35 300312010  
36 300313017  
37 300321011  
38 300322016  
39 300411016  
40 300941014  
41 395780010  
42 451133011  
43 451134017  
44 267321000006114  
45 370701000006118  
46 542251000006112  
47 542261000006114  
48 543141000006110  
49 841051000006113  
50 1573101000006112  
51 1576261000006112  
52 1900601000006111

For peer review only

1  
2 1900651000006110  
3 2436731000000112  
4 2729551000000111  
5 2729571000000119  
6 5011041000006118  
7 5011051000006116  
8 5011061000006119  
9 5011091000006110  
10 5011101000006116  
11 5011131000006112  
12 5011291000006119  
13 5011331000006114  
14 5011351000006119  
15 5582311000006110  
16 7598981000006119  
17 7599001000006116  
18 7839991000006115  
19 8011371000006117  
20 296995010  
21 405339016  
22 1227592012  
23 3508952018  
24 3508955016  
25 3508958019  
26 3508961018  
27 3508964014  
28 3509777019  
29 3509790014  
30 3509794017  
31 3509799010  
32 3509810017  
33 3636133016  
34 605461000006117  
35 605481000006110  
36 605491000006113  
37 809421000006116  
38 1716621000000117  
39 1773371000006117  
40 4778181000006119  
41 4778201000006118  
42 5649201000006113  
43 7519441000006112  
44 13717171000006112  
45 13718601000006110  
46 13718621000006117  
47 14014251000006116  
48 14194191000006114  
49 14194211000006110  
50 14194281000006115  
51 14194331000006112

For peer review only



1  
2 14194491000006118  
3 14194571000006115  
4 14194611000006113  
5 14194641000006112  
6 14194661000006111  
7  
8 14194741000006118  
9 14194801000006111  
10 14194841000006113  
11 14194941000006115  
12  
13 14194971000006111  
14 300370010  
15 300371014  
16 411518010  
17 1780304018  
18  
19 605501000006117  
20 909171000006115  
21 MedCodeId  
22 100323011  
23 100638016  
24 104952014  
25  
26 107018015  
27 107602013  
28 107661000006110  
29 107800019  
30  
31 110721000006114  
32 111210017  
33 112508017  
34 114794013  
35 1148731000000112  
36 11903671000006114  
37 11904601000006118  
38 11904611000006115  
39  
40 121721014  
41 1219655013  
42 1221108018  
43 1222437010  
44 1223979019  
45 1224865018  
46 1224974015  
47 1225697014  
48 1229775013  
49  
50 1233040016  
51 1234144017  
52 1234731016  
53 124598014  
54  
55 12465281000006112  
56 124689016  
57 12477641000006119  
58 125891000006119  
59  
60 125901000006115

For peer review only

1  
2 125971000006114  
3 12704251000006113  
4 12704731000006113  
5 12717021000006115  
6 12725491000006112  
7  
8 127307018  
9 12733271000006111  
10 12759421000006112  
11 127990018  
12 130209011  
13 13165015  
14 132112014  
15 134251013  
16 134601000006111  
17 134744017  
18 136147016  
19 136148014  
20 137233019  
21 141723016  
22 142016013  
23 142653015  
24 143230018  
25 147444011  
26 1480894012  
27 1481810012  
28 1491762016  
29 1492251019  
30 151586018  
31 151829017  
32 151951000006115  
33 151961000006118  
34 1648061000000115  
35 1672021000006115  
36 1679791000006113  
37 1682241000006111  
38 1682791000006112  
39 1705661000006112  
40 1728581000006115  
41 1763331000006113  
42 1772621000006118  
43 1774931000006117  
44 1776211019  
45 1777664015  
46 1777666018  
47 1778099018  
48 1778554019  
49 1780951000006111  
50 1781041000006119  
51 1784692011  
52 1785557019

For peer review only

1  
2 1786041000006110  
3 1786065018  
4 1786163010  
5 178743010  
6 178750014  
7 18091019  
8 1815931000006114  
9 1815951000006119  
10 1815971000006112  
11 1815981000006110  
12 1846861000006111  
13 1858901000006117  
14 187765019  
15 187824013  
16 1883621000006119  
17 198171000006110  
18 198381000006110  
19 19943011  
20 19944017  
21 206411014  
22 207847010  
23 2108221000000110  
24 211331000006117  
25 2122001000000116  
26 2168441000000115  
27 220771000000110  
28 221361000006118  
29 223801000000115  
30 2267591000000110  
31 2283041000000116  
32 2283831000000117  
33 2326271000000114  
34 243291000006119  
35 244311000006117  
36 2475876012  
37 2475877015  
38 251539016  
39 2517761000006112  
40 2524111000006113  
41 2526611000006112  
42 2526621000006116  
43 2526631000006118  
44 2526651000006113  
45 2546861000006113  
46 2546871000006118  
47 254829017  
48 254833012  
49 254834018  
50 254835017  
51 254935018  
52  
53  
54  
55  
56  
57  
58  
59  
60

For peer review only

1  
2 254939012  
3 254940014  
4 254941013  
5 254944017  
6 254950010  
7 254951014  
8 255061010  
9 255062015  
10 2554211000006118  
11 2566251000006117  
12 2582941000006110  
13 2582951000006112  
14 2582961000006114  
15 2582971000006119  
16 2583601000006114  
17 2597431000006110  
18 2597441000006117  
19 2597451000006115  
20 2637771000000114  
21 264417019  
22 2650601000006118  
23 2665351000006114  
24 2665361000006111  
25 2665371000006116  
26 2665381000006118  
27 2674605012  
28 2692565012  
29 2726231000006116  
30 2730161000006118  
31 2730171000006113  
32 2730181000006111  
33 2730191000006114  
34 2730201000006112  
35 2767491000006113  
36 27731000006112  
37 2784591000006116  
38 2784601000006112  
39 2784611000006110  
40 280121000006113  
41 28047015  
42 2806371000006116  
43 2806381000006118  
44 2821931000006118  
45 2824381000006115  
46 2824391000006117  
47 2824401000006115  
48 2824411000006117  
49 2824421000006113  
50 2824431000006111  
51 2838078010

For peer review only

1  
2 2841061014  
3 286395017  
4 286639018  
5 286641017  
6 286642012  
7 286643019  
8 286644013  
9 286645014  
10 2880611000006115  
11 2880621000006111  
12 2880631000006114  
13 288115019  
14 288116018  
15 2894411000006110  
16 2894421000006119  
17 2900005013  
18 2900031000006111  
19 2900041000006118  
20 2900051000006116  
21 2900061000006119  
22 2901621000006111  
23 2901631000006114  
24 2905521000006110  
25 2905541000006115  
26 2905551000006118  
27 2905561000006116  
28 2905571000006111  
29 2905581000006114  
30 2905591000006112  
31 2905601000006116  
32 2905611000006118  
33 2905631000006112  
34 2905641000006119  
35 2912671000006115  
36 293326016  
37 293544011  
38 293813012  
39 2949121000006114  
40 2966061000006116  
41 2966101000006118  
42 296838010  
43 296840017  
44 296841018  
45 2968551000006111  
46 2968561000006113  
47 2968571000006118  
48 296884017  
49 296959019  
50 296966018  
51 296982017

For peer review only

1  
2 296987011  
3 297037012  
4 297041011  
5 297043014  
6 297045019  
7 297107018  
8 297108011  
9 297112017  
10 297117011  
11 297118018  
12 297120015  
13 297122011  
14 297123018  
15 297125013  
16 297127017  
17 297130012  
18 297131011  
19 297132016  
20 297177019  
21 297179016  
22 297180018  
23 297181019  
24 297182014  
25 297190014  
26 297195016  
27 297196015  
28 297210016  
29 297221013  
30 297223011  
31 297232013  
32 297233015  
33 297234014  
34 297238012  
35 297239016  
36 297241015  
37 297242010  
38 297243017  
39 297244011  
40 297522019  
41 297525017  
42 297539017  
43 2975521000006117  
44 2975531000006119  
45 2975541000006112  
46 2975551000006114  
47 2975561000006111  
48 2975571000006116  
49 2975581000006118  
50 2975591000006115  
51 2975601000006111

For peer review only

1  
2 2975611000006114  
3 2975621000006118  
4 297564019  
5 297581011  
6 297582016  
7 297583014  
8 297584015  
9 297588017  
10 297589013  
11 297591017  
12 297592012  
13 297593019  
14 297601018  
15 297602013  
16 297605010  
17 297607019  
18 297608012  
19 297610014  
20 297623019  
21 297625014  
22 297626010  
23 297627018  
24 2976311000006114  
25 2976321000006118  
26 297635015  
27 297636019  
28 297637011  
29 297639014  
30 297640011  
31 297641010  
32 297643013  
33 297644019  
34 297645018  
35 297646017  
36 297647014  
37 297654015  
38 297655019  
39 299241000000110  
40 299303019  
41 299304013  
42 299305014  
43 299306010  
44 299312017  
45 299313010  
46 299314016  
47 299321016  
48 299323018  
49 299329019  
50 299330012  
51 299332016  
52  
53  
54  
55  
56  
57  
58  
59  
60

For peer review only

1  
2 299377019  
3 299378012  
4 299379016  
5 299380018  
6 299388013  
7  
8 299389017  
9 299390014  
10 299391013  
11 299392018  
12  
13 299393011  
14 299394017  
15 300141000000119  
16 3001451000006118  
17 3001471000006111  
18 3001481000006114  
19 3001491000006112  
20  
21 300389010  
22 3005741000006110  
23 3005751000006112  
24 300945017  
25  
26 301341000006119  
27 301719013  
28 3028151000006111  
29 3028161000006113  
30 3051551000006111  
31 3051561000006113  
32 3101701000006117  
33 3101721000006110  
34  
35 311610013  
36 311617011  
37 311933012  
38 311934018  
39 311935017  
40 311936016  
41 311937013  
42 311938015  
43 311939011  
44 311940013  
45 311941012  
46 311942017  
47 311943010  
48 311944016  
49 312580013  
50 312591018  
51 312638019  
52 3142311000006118  
53 3142321000006114  
54 3142331000006112  
55 3142341000006119  
56 3142351000006117

For peer review only



1  
2 3142511000006112  
3 3142531000006118  
4 3142551000006113  
5 315671000000110  
6 3159741000006112  
7 3159751000006114  
8 3159761000006111  
9 3159771000006116  
10 3159791000006115  
11 3159801000006119  
12 3159811000006116  
13 3159821000006112  
14 3159831000006110  
15 3159841000006117  
16 3170061000006117  
17 3170081000006110  
18 317120013  
19 317127011  
20 317651000000113  
21 3195451000006114  
22 3208041000006113  
23 3240521000006115  
24 3240531000006117  
25 3247231000006116  
26 3247241000006114  
27 3247251000006111  
28 3247271000006118  
29 3247281000006115  
30 3253991000006119  
31 3254021000006118  
32 3256761000006118  
33 3288331000006116  
34 3288341000006114  
35 3288351000006111  
36 3288361000006113  
37 3288371000006118  
38 3293611000006112  
39 3293621000006116  
40 3293631000006118  
41 3293641000006111  
42 3293651000006113  
43 3293661000006110  
44 3293671000006115  
45 3293681000006117  
46 3319161000006112  
47 3325651000006114  
48 3325661000006111  
49 33622011  
50 3367711000006117  
51 3367721000006113

For peer review only

1 3377581000006110  
2 3380781000006113  
3 3380791000006111  
4 3380811000006110  
5 3380821000006119  
6 3380831000006116  
7 3380841000006114  
8 3381191000006118  
9 3381201000006115  
10 3381211000006117  
11 3416421000006111  
12 3426051000006115  
13 3426061000006118  
14 3426071000006113  
15 3441181000006115  
16 3441201000006119  
17 3441211000006116  
18 3441481000006110  
19 3441491000006113  
20 3441501000006117  
21 3445431000006112  
22 3445451000006117  
23 3446901000006115  
24 3446911000006117  
25 3446921000006113  
26 3446931000006111  
27 3446941000006118  
28 3446951000006116  
29 3446961000006119  
30 3446971000006114  
31 3446981000006112  
32 3449761000006113  
33 3449771000006118  
34 3449781000006115  
35 3449801000006116  
36 345037013  
37 345068012  
38 345121017  
39 345122012  
40 345221014  
41 345223012  
42 3455151000006111  
43 345594014  
44 345701012  
45 345771011  
46 345773014  
47 345780011  
48 3480751000006110  
49 3480761000006112  
50 3480771000006117

For peer review only

1  
2 348287011  
3 3483991000006113  
4 3484001000006116  
5 3484011000006118  
6 3484021000006114  
7 3484041000006119  
8 3484051000006117  
9 3484061000006115  
10 3486721000006115  
11 3501681000006110  
12 3501691000006113  
13 3501701000006113  
14 3501711000006111  
15 3501721000006115  
16 3501731000006117  
17 3501741000006110  
18 3501751000006112  
19 3501761000006114  
20 3532651000006115  
21 35440018  
22 3547281000006113  
23 3547301000006112  
24 3547311000006110  
25 3547321000006119  
26 3547331000006116  
27 3553301000006118  
28 3553311000006115  
29 3553321000006111  
30 3553331000006114  
31 3555041000006119  
32 356811012  
33 3569341000006114  
34 3569351000006111  
35 3569361000006113  
36 359459016  
37 359673017  
38 359699012  
39 359712012  
40 3601731000006114  
41 3601741000006116  
42 3601951000006116  
43 3613541000006112  
44 3614661000006114  
45 3614671000006119  
46 3614691000006118  
47 3667821000006111  
48 3671061000006110  
49 3671071000006115  
50 3691951000006119  
51 3691961000006117

For peer review only

1  
2 3691971000006112  
3 3694981000006113  
4 3694991000006111  
5 3695001000006116  
6 370681000006116  
7  
8 3720541000006119  
9 3720561000006115  
10 3720571000006110  
11 3746951000006112  
12 3746961000006114  
13 3753631000006115  
14 3763421000006110  
15 3763431000006113  
16 3763441000006115  
17 376791000006111  
18 3768201000006114  
19 3768211000006112  
20 3768221000006116  
21 3768241000006111  
22 3768251000006113  
23 3776451000006119  
24 3779961000006118  
25 383065014  
26 3845821000006119  
27 3845831000006116  
28 3845841000006114  
29 3845851000006111  
30 3845871000006118  
31 3846021000006116  
32 3846031000006118  
33 3846041000006111  
34 3846051000006113  
35 3884271000006114  
36 3889791000006116  
37 3889801000006115  
38 3889811000006117  
39 3889821000006113  
40 3898641000006114  
41 3898651000006111  
42 3898661000006113  
43 3927641000006114  
44 3927651000006111  
45 3927661000006113  
46 3931641000006118  
47 3931651000006116  
48 3945241000006118  
49 3945251000006116  
50 3945261000006119  
51 39846012  
52 3988981000006118  
53  
54  
55  
56  
57  
58  
59  
60

For peer review only

1  
2 3988991000006115  
3 399191000006111  
4 399201000006114  
5 399371000006112  
6 399400019  
7 399401000006110  
8 399420018  
9 399421019  
10 399422014  
11 399436016  
12 40055016  
13 4015801000006118  
14 4015811000006115  
15 402512016  
16 402513014  
17 402514015  
18 409341000006112  
19 411453017  
20 411454011  
21 411455012  
22 411456013  
23 411822012  
24 412051000006115  
25 41398015  
26 414541000006119  
27 414561000006115  
28 415146010  
29 415147018  
30 4177151000006119  
31 4177161000006117  
32 4177181000006110  
33 41961013  
34 41962018  
35 4196391000006115  
36 4196401000006118  
37 4196411000006115  
38 4196431000006114  
39 4196441000006116  
40 4196451000006119  
41 4196461000006117  
42 4196471000006112  
43 4196491000006113  
44 4196651000006117  
45 4196661000006115  
46 422941000006114  
47 42524012  
48 426301000006114  
49 428171000006118  
50 428581000006114  
51 428601000006116

For peer review only

1 4405181000006112  
2 4405191000006110  
3 4410181000006116  
4 4427721000006110  
5 4427731000006113  
6 4428511000006110  
7 448235011  
8 450830018  
9 451123015  
10 4539231000006115  
11 456401000006118  
12 4566571000006117  
13 4566621000006119  
14 4566641000006114  
15 4566651000006111  
16 4566661000006113  
17 4566681000006115  
18 4567631000006119  
19 4567691000006115  
20 4567711000006117  
21 4567731000006111  
22 4567791000006110  
23 4567891000006116  
24 4569041000006110  
25 4569061000006114  
26 4742071000006115  
27 47484015  
28 4759751000006118  
29 4759771000006111  
30 4759781000006114  
31 4759791000006112  
32 4759801000006113  
33 4759811000006111  
34 4759821000006115  
35 4759831000006117  
36 4759841000006110  
37 4759851000006112  
38 476701000006114  
39 4767941000006119  
40 4767951000006117  
41 4768661000006111  
42 4768671000006116  
43 4768681000006118  
44 4768691000006115  
45 4768701000006115  
46 4768711000006117  
47 4768731000006111  
48 4768741000006118  
49 4768751000006116  
50 4768761000006119

For peer review only

1  
2 4769091000006117  
3 4769101000006111  
4 4769111000006114  
5 4769281000006110  
6 4769291000006113  
7 4769321000006116  
8 4769341000006111  
9 4769391000006119  
10 4769421000006110  
11 4770411000006116  
12 4770721000006119  
13 4770761000006113  
14 4770841000006119  
15 4770871000006110  
16 4770891000006111  
17 4770931000006119  
18 4770951000006114  
19 4770971000006116  
20 4770991000006115  
21 4771001000006119  
22 478046010  
23 4782441000006114  
24 4782451000006111  
25 478396017  
26 47937012  
27 4819691000006111  
28 4819721000006118  
29 48512013  
30 48513015  
31 48515010  
32 486177011  
33 486695013  
34 494103012  
35 49474011  
36 49542018  
37 496154014  
38 496159016  
39 496911000006118  
40 497021000006113  
41 498020017  
42 498788015  
43 499491010  
44 499948010  
45 5005041000006118  
46 5005341000006116  
47 5005361000006117  
48 5005371000006112  
49 5005921000006112  
50 5005931000006110  
51 5005991000006114

For peer review only

1 5006171000006115  
2 5007001000006112  
3 5007011000006110  
4 5007031000006116  
5 5007041000006114  
6 5007921000006115  
7 5011691000006117  
8 5011701000006117  
9 5012271000006111  
10 5012321000006115  
11 5012331000006117  
12 5012341000006110  
13 5012351000006112  
14 5012361000006114  
15 504081000006111  
16 5141031000006112  
17 52052015  
18 52463013  
19 5381371000006113  
20 5381381000006111  
21 538601000006110  
22 542301000006117  
23 542991000006113  
24 543071000006115  
25 5501291000006119  
26 5501301000006118  
27 5501311000006115  
28 5501321000006111  
29 5501331000006114  
30 5509101000006115  
31 55351000006111  
32 55426011  
33 5573561000006115  
34 5577511000006113  
35 5611491000006112  
36 5614151000006112  
37 5614181000006116  
38 571541000006116  
39 584031000006114  
40 5904251000006117  
41 5904271000006110  
42 5944191000006113  
43 5944201000006111  
44 59911000006112  
45 6060631000006111  
46 6060641000006118  
47 6080016  
48 614691000006113  
49 625401000006110  
50 625421000006117

For peer review only



1  
2 630491000006110  
3 631811000006111  
4 63319012  
5 633431000006115  
6 640991000006117  
7 641041000006119  
8 641211000000118  
9 641301000000114  
10 6461171000006118  
11 6476861000006119  
12 6476871000006114  
13 6476881000006112  
14 64875013  
15 6566121000006117  
16 6566131000006119  
17 6566141000006112  
18 6568031000006116  
19 6568041000006114  
20 6568051000006111  
21 6568061000006113  
22 6568081000006115  
23 6568091000006117  
24 6568101000006111  
25 6568111000006114  
26 6596741000006113  
27 6596751000006110  
28 6596761000006112  
29 6596771000006117  
30 6596791000006116  
31 6596801000006115  
32 6596811000006117  
33 6597711000006111  
34 6597721000006115  
35 6597731000006117  
36 6597741000006110  
37 6597751000006112  
38 6597761000006114  
39 6597771000006119  
40 6597811000006119  
41 6597821000006110  
42 6597831000006113  
43 6599291000006119  
44 6599301000006118  
45 6599321000006111  
46 6599331000006114  
47 660171000006114  
48 660231000006117  
49 6607251000006111  
50 6607261000006113  
51 6607271000006118

For peer review only

1  
2 661251000006116  
3 6617161000006116  
4 6617171000006111  
5 6617181000006114  
6 6617191000006112  
7  
8 6617201000006110  
9 6617211000006113  
10 66483014  
11 682621000006119  
12 682631000006116  
13 682641000006114  
14 682681000006115  
15 682691000006117  
16 682701000006117  
17  
18 682841000006110  
19 682861000006114  
20 682891000006118  
21  
22 68321016  
23 683431000006111  
24 6839012  
25  
26 695191000006119  
27 696641000006114  
28 699671000000115  
29 699731000000110  
30 699791000000111  
31 699911000000117  
32  
33 701491000006117  
34 7045281000006112  
35 7058051000006116  
36 7092351000006112  
37 7108161000006116  
38 716831000006114  
39  
40 71981018  
41 72531016  
42  
43 7289421000006111  
44 73325012  
45 734711000006110  
46 7349161000006111  
47 736381000006110  
48 740431000006115  
49 753451000006118  
50 761411000006111  
51 7620901000006112  
52  
53 77128019  
54 7717281000006114  
55 7717301000006113  
56 7717311000006111  
57 7717321000006115  
58 7730241000006111  
59 7774171000006115  
60

For peer review only

1  
2 778591000006118  
3 78021014  
4 78022019  
5 81717011  
6 81719014  
7  
8 8193781000006112  
9 8328151000006111  
10 8328171000006118  
11 8328191000006117  
12 8328211000006116  
13 8328231000006110  
14 8328251000006115  
15 8328271000006113  
16 8328331000006119  
17 8328461000006117  
18 8328481000006110  
19 8328501000006117  
20 8328531000006113  
21 8328551000006118  
22 8328571000006111  
23 8328591000006112  
24 8342831000006112  
25 84200019  
26 84201015  
27 84272011  
28 84935014  
29 856091000006114  
30 857181000006110  
31 882961000006112  
32 883181000006113  
33 883191000006111  
34 89919017  
35 90229010  
36 90263012  
37 905781000006118  
38 905801000006119  
39 905821000006112  
40 905891000006114  
41 907241000006111  
42 907411000006113  
43 908811000006112  
44 908821000006116  
45 909021000006117  
46 94780015  
47 96850018  
48 9742014  
49 9822014  
50 983261000006119  
51 983271000006114  
52 983281000006112

For peer review only

1  
2 983291000006110  
3 983301000006111  
4 983311000006114  
5 99251000006111  
6  
7  
8  
9  
10  
11  
12  
13  
14  
15  
16  
17  
18  
19  
20  
21  
22  
23  
24  
25  
26  
27  
28  
29  
30  
31  
32  
33  
34  
35  
36  
37  
38  
39  
40  
41  
42  
43  
44  
45  
46  
47  
48  
49  
50  
51  
52  
53  
54  
55  
56  
57  
58  
59  
60

For peer review only

1  
2 Term  
3 Juvenile myoclonic epilepsy  
4 Status epilepticus  
5 Benign Rolandic epilepsy  
6 Gelastic epilepsy  
7 Epilepsy  
8 Witnessed epileptic seizure  
9 H/O: epilepsy  
10 Epilepsy monitoring  
11 Initial epilepsy assessment  
12 Follow-up epilepsy assessment  
13 Epilepsy associated problems  
14 Epilepsy drug side effect  
15 Epilepsy treatment changed  
16 Epilepsy treatment started  
17 Epilepsy treatment stopped  
18 Epilepsy monitoring NOS  
19 Epileptic seizures - atonic  
20 Epileptic seizures - akinetic  
21 Neonatal myoclonic epilepsy  
22 Epileptic seizures - clonic  
23 Epileptic seizures - myoclonic  
24 Epileptic seizures - tonic  
25 Other specified generalised convulsive epilepsy  
26 Generalised convulsive epilepsy NOS  
27 Partial epilepsy with impairment of consciousness  
28 Temporal lobe epilepsy  
29 Psychosensory epilepsy  
30 Epileptic automatism  
31 Partial epilepsy with impairment of consciousness NOS  
32 Somatosensory epilepsy  
33 Partial epilepsy with autonomic symptoms  
34 Visceral reflex epilepsy  
35 Visual reflex epilepsy  
36 Unilateral epilepsy  
37 Kojevnikov's epilepsy  
38 Other forms of epilepsy  
39 Cursive (running) epilepsy  
40 Other forms of epilepsy NOS  
41 [X]Other generalized epilepsy and epileptic syndromes  
42 [X]Other epilepsy  
43 [X]Other status epilepticus  
44 [X]Status epilepticus, unspecified  
45 Focal epilepsy  
46 Juvenile absence epilepsy  
47 Severe myoclonic epilepsy in infancy  
48 Drug-induced epilepsy  
49 Menstrual epilepsy  
50 Nocturnal epilepsy  
51 Complex partial status epilepticus

1 Progressive myoclonic epilepsy  
2 Epilepsy NOS  
3 Motor epilepsy  
4 Jacksonian, focal or motor epilepsy  
5 Epileptic seizure  
6 Epilepsy control good  
7 Epilepsy control poor  
8 Tonic-clonic epilepsy  
9 Grand mal epilepsy  
10 Psychomotor epilepsy  
11 Alcohol-induced epilepsy  
12 Pykno-epilepsy  
13 Generalised convulsive epilepsy  
14 Photosensitive epilepsy  
15 Transient epileptic amnesia  
16 Epilepsy medication review  
17 Epilepsy care arrangement  
18 Epilepsy severity  
19 Emergency epilepsy treatment since last appointment  
20 Suspected epilepsy  
21 Epilepsy confirmed  
22 Complex partial epileptic seizure  
23 Stress-induced epilepsy  
24 Traumatic epilepsy  
25 No epilepsy drug side effects  
26 Epilepsy monitoring verbal invite  
27 Generalised non-convulsive epilepsy  
28 Seen in epilepsy clinic  
29 Pyridoxine-dependent epilepsy  
30 Recurrent complex partial epilepsy  
31 Other specified generalised nonconvulsive epilepsy  
32 Tonic-clonic epilepsy  
33 Status epilepticus, unspecified  
34 Epilepsy limits activities  
35 Epilepsy screening administration  
36 Epilepsy screening first invitation  
37 Epilepsy screening second invitation  
38 Epilepsy screening third invitation  
39 Exception reporting - epilepsy quality indicators  
40 Excepted from epilepsy quality indicators - informed dissent  
41 Epilepsy restricts employment  
42 Epilepsy prevents employment  
43 Epilepsy does not limit activities  
44 Epilepsy management plan given  
45 Sensory induced epilepsy  
46 Epilepsy impairs education  
47 Did not attend epilepsy clinic  
48 Generalised epilepsy  
49 Petit mal (minor) epilepsy  
50 Localisation-related epilepsy

1  
2 Partial epilepsy  
3 Partial epilepsy without impairment of consciousness OS  
4 Simple partial epileptic seizure  
5 Epilepsy monitoring call first letter  
6 Epilepsy monitoring call second letter  
7 Epilepsy monitoring call third letter  
8 Acquired epileptic aphasia  
9  
10 [X]Antiepilept + antiparksn drug caus advers eff therap use  
11 [X]Epileptic psychosis NOS  
12 Antiepileptic adverse reaction  
13 Epilepsy monitoring telephone invite  
14 [X]Schizophrenia-like psychosis in epilepsy  
15 Epileptic absences  
16 Localization-related(focal)(partial)idiopathic epilepsy and epileptic syndromes with seizures of localised onset  
17 Limbic system epilepsy  
18 Generalised nonconvulsive epilepsy NOS  
19 Partial epilepsy  
20 Petit mal epilepsy  
21 Post traumatic epilepsy  
22 [RFC] Epilepsy/convulsion  
23 Epilepsy monitoring  
24 Initial epilepsy assessment  
25 Follow-up epilepsy assessment  
26 Epilepsy associated problems  
27 Epilepsy drug side effects  
28 Nocturnal epilepsy  
29 Excepted from epilepsy quality indicators - patient unsuitable  
30 Early infantile epileptic encephalopathy with suppression bursts  
31 Adverse reaction to Antiepileptics  
32 Adverse reaction to Drugs Used In Control Of Epilepsy  
33 Adverse reaction to Drugs Used In Status Epilepticus  
34 Contraceptive advice for patients with epilepsy  
35 Pre-conception advice for patients with epilepsy  
36 Pregnancy advice for patients with epilepsy  
37 Pregnancy advice for patients with epilepsy not indicated  
38 Contraceptive advice for patients with epilepsy declined  
39 Pre-conception advice for patients with epilepsy declined  
40 Pregnancy advice for patients with epilepsy declined  
41 Epilepsy treatment continued  
42 Epilepsy monitoring call first letter  
43 Epilepsy monitoring call third letter  
44 Contraceptive advice for patients with epilepsy not indicated  
45 Pre-conception advice for patients with epilepsy not indicated  
46 Reason for referral: Epilepsy  
47 Epilepsy monitoring administration  
48 Epilepsy monitoring in primary care  
49 Epilepsy monitoring in secondary care  
50 Epilepsy treatment compliance  
51 Epilepsy treatment compliance good  
52 Epilepsy treatment compliance poor

1  
2 Epilepsy monitoring default  
3 3D study - problems with epilepsy management  
4 Provision of information about SUDEP (sudden unexpected death in epilepsy)  
5 Contraceptive advice for patients on valproate for epilepsy  
6 Referral to epilepsy clinic  
7 Referral to epilepsy service  
8 Paediatric epilepsy care plan  
9 At risk of sudden unexpected death in epilepsy  
10 Epilepsia partialis continua  
11 Focal status epilepticus  
12 Neurological Disorders Depression Inventory in Epilepsy  
13 SUDEP - sudden unexpected death in epilepsy  
14 Epileptic absence status  
15 Non-convulsive status epilepticus with impaired consciousness  
16 Convulsive status epilepticus  
17 Generalized epilepsy  
18 Idiopathic generalised epilepsy  
19 Idiopathic generalized epilepsy  
20 Primary generalised epilepsy  
21 Temporal-central focal epilepsy  
22 Centrotemporal epilepsy  
23 Childhood absence epilepsy  
24 Symptomatic generalised epilepsy  
25 Symptomatic generalized epilepsy  
26 Secondary generalized epilepsy  
27 Post-traumatic epilepsy  
28 PTE - Post-traumatic epilepsy  
29 Unclassified epileptic seizures  
30 Reflex epilepsy  
31 Sensory-induced epilepsy  
32 Epileptic disorder  
33 Epileptic  
34 EP - Epilepsy  
35 Photogenic epilepsy  
36 History of epilepsy  
37 Epileptic drop attack  
38 Benign myoclonic epilepsy in infancy  
39 TLE - Temporal lobe epilepsy  
40 Mesial limbic epilepsy  
41 At risk of epileptic fits  
42 Benign frontal epilepsy of childhood  
43 Benign atypical partial epilepsy in childhood  
44 Epilepsy with recurrent unilateral seizures in children  
45 Benign occipital epilepsy of childhood - early onset variant  
46 Frontal lobe epilepsy  
47 Opercular epilepsy  
48 Parietal lobe epilepsy  
49 Occipital lobe epilepsy  
50 Epilepsy with grand mal seizures on awakening  
51 Cryptogenic generalised epilepsy  
52  
53  
54  
55  
56  
57  
58  
59  
60



1 Myoclonic astatic epilepsy  
2 Myoclonic absence epilepsy  
3 Cryptogenic myoclonic epilepsy  
4 Idiopathic myoclonic epilepsy  
5 Symptomatic myoclonic epilepsy  
6 Epilepsy undetermined whether focal or generalised  
7 Epilepsy with continuous spike wave during slow-wave sleep  
8 Secondary reading epilepsy  
9 Sleep-related epilepsy  
10 Eating epilepsy  
11 Non-convulsive status epilepticus without three per second spike wave  
12 Non-convulsive simple partial status epilepticus  
13 Epileptic psychosis  
14 Triple X syndrome, epilepsy, and hypogammaglobulinaemia  
15 Epilepsy monitoring status  
16 Generalised epileptiform discharges  
17 Generalized epileptiform discharges  
18 Bilateral periodic epileptiform discharges  
19 Localisation-related idiopathic epilepsy  
20 Epileptic fit  
21 Carbamazepine antiepileptic  
22 Epilepsy monitoring call  
23 Refractory epilepsia partialis continua  
24 Non-epileptic myoclonus  
25 Epilepsy assessment  
26 Nonconvulsive status epilepticus  
27 Refractory epilepsy  
28 Intractable epilepsy  
29 Refractory juvenile myoclonic epilepsy  
30 X-linked epilepsy with learning disability and behaviour disorder syndrome  
31 Epileptic encephalopathy  
32 Epilepsy due to stroke  
33 Epilepsy with mesial temporal sclerosis  
34 Epilepsy co-occurrent and due to dementia  
35 Epilepsy telangiectasia syndrome  
36 Epilepsy of infancy with migrating focal seizures  
37 Epileptic dementia with behavioural disturbance  
38 Intractable partial temporal lobe epilepsy with impairment of consciousness  
39 DNA (did not attend) epilepsy clinic  
40 Epilepsy in pregnancy  
41 Atypical absence epilepsy  
42 Epilepsy care education  
43 Epilepsy monitoring telephone invitation  
44 Infantile spasms with status epilepticus  
45 Petit-mal epilepsy  
46 Epilepsy screening invitation  
47 Referral for epilepsy review  
48 Under care of epilepsy specialist nurse  
49 Epilepsy annual review  
50 Epilepsy care management

1 Epilepsy self-management plan review  
2 Paediatric epilepsy service  
3 Referral to epilepsy specialist nurse declined  
4 Infantile-onset symptomatic epilepsy syndrome  
5 STXBP1 encephalopathy with epilepsy  
6 Benign familial mesial temporal lobe epilepsy  
7 Benign occipital lobe epilepsy  
8 Benign partial epilepsy of infancy with complex partial seizures  
9 Mesial temporal lobe epilepsy with hippocampal sclerosis  
10 New-onset refractory status epilepticus  
11 Cortical dysplasia with focal epilepsy syndrome  
12 Infantile epileptic dyskinetic encephalopathy  
13 Early-onset spastic ataxia, myoclonic epilepsy, neuropathy syndrome  
14 KCNQ2-related epileptic encephalopathy  
15 Myoclonic epilepsy in non-progressive encephalopathy  
16 Cryptogenic late-onset epileptic spasms  
17 Congenital muscular dystrophy with intellectual disability and severe epilepsy  
18 Familial temporal lobe epilepsy  
19 Familial mesial temporal lobe epilepsy with febrile seizures  
20 Benign childhood epilepsy with centrotemporal spikes, refractory  
21 Benign childhood epilepsy with centrotemporal spikes, non-refractory  
22 Epilepsy due to infectious encephalitis  
23 Scar epilepsy  
24 Cerebellar stroke syndrome  
25 Admission to stroke unit  
26 H/O: Stroke in last year  
27 Occlusive stroke  
28 [V]Personal history of stroke  
29 Referral to stroke clinic  
30 H/O: stroke  
31 Haemorrhagic stroke monitoring  
32 Left hemispheric cerebellar artery embolism with stroke  
33 PASS (Postural Assessment Scale for Stroke Patients) score  
34 Exception reporting - stroke quality indicators  
35 Excepted from stroke quality indicators - patient unsuitable  
36 Excepted from stroke quality indicators - informed dissent  
37 Sequelae of stroke, not spec'd as h'morrhage or infarction  
38 Did not attend stroke clinic  
39 Seen in stroke clinic  
40 Delivery of rehabilitation for stroke  
41 [X]Sequelae of stroke, not spec'd as h'morrhage or infarction  
42 Brainstem stroke syndrome  
43 [RFC] Stroke/CVA  
44 [RFC] Stroke  
45 [RFC] Stroke  
46 MELAS - Mitochondrial encephalopathy, lactic acidosis and stroke-like episodes  
47 Referral to multidisciplinary stroke function improvement service  
48 Annual Stroke/CVA blood test  
49 Suspected stroke  
50 Suspected stroke

1 Referral for multidisciplinary stroke function improvement declined  
2 Referral by stroke nurse specialist  
3 VTE risk assessment - acute stroke  
4 Referral to stroke rehabilitation service  
5 Referral to community stroke service  
6 Discharge from community stroke service  
7 Completed stroke  
8 Juvenile myopathy, encephalopathy, lactic acidosis AND stroke  
9 Brain stem stroke  
10 Nonparalytic stroke  
11 Total anterior cerebral circulation stroke  
12 TACS - Total anterior cerebral circulation stroke  
13 Partial anterior cerebral circulation stroke  
14 PACS - Partial anterior cerebral circulation stroke  
15 Posterior cerebral circulation stroke  
16 Anterior circulation stroke of uncertain pathology  
17 Posterior circulation stroke of uncertain pathology  
18 Spinal cord stroke  
19 Referral to stroke service  
20 Discharge from stroke service  
21 Seen by stroke service  
22 Thrombotic stroke  
23 Embolic stroke  
24 Neonatal stroke  
25 Basal ganglion stroke  
26 Cardioembolic stroke  
27 Ischaemic stroke  
28 Ischemic stroke  
29 Thalamic stroke  
30 Post stroke pain  
31 Cerebral ischaemic stroke due to small artery occlusion  
32 Epilepsy due to stroke  
33 Sequela of cardioembolic stroke  
34 DNA (did not attend) stroke clinic  
35 Ischaemic stroke without coma  
36 Did not attend stroke review  
37 Management of stroke rehabilitation  
38 Acute stroke care  
39 Haemorrhagic stroke  
40 Emergency hospital admission to stroke service  
41 Cerebellar stroke  
42 History of ischaemic stroke  
43 Cerebral ischaemic stroke due to dissection of artery  
44 Cerebral ischaemic stroke due to global hypoperfusion with watershed infarct  
45 Cerebral ischaemic stroke due to hypercoagulable state  
46 Cerebral ischaemic stroke co-occurrent with subarachnoid haemorrhage  
47 Cryptogenic stroke  
48 Acute stroke due to occlusion of left posterior cerebral artery  
49 Acute stroke of brainstem  
50 Acute ischaemic stroke

1 Stroke monitoring  
2 Stroke in the puerperium  
3 Central post-stroke pain  
4 Stroke due to basilar artery thrombus  
5 Stroke due to thrombus of right middle cerebral artery  
6 Stroke due to thrombus of left middle cerebral artery  
7 Stroke care plan  
8 Stroke due to cerebral arterial occlusion  
9 Stroke unspecified  
10 Stroke/CVA - undefined  
11 Stroke  
12 Stroke monitoring administration  
13 Stroke monitoring invite 1  
14 Stroke monitoring invite 2  
15 Stroke monitoring invite 3  
16 Stroke 6 month review  
17 Mitoch myopath/encephalopath/lactic acidosis/stroke-like episode  
18 Central post-stroke pain  
19 Stroke self-management plan review  
20 Stroke self-management plan agreed  
21 Stroke annual review  
22 Stroke initial post discharge review  
23 Stroke rehabilitation  
24 Stroke  
25 Stroke of uncertain pathology  
26 Stroke test positive  
27 Stroke test negative  
28 Stroke clinic  
29 Stroke impact scale version 3.0  
30 Stroke impact scale version 3.0 score  
31 Stroke/cerebrovascular accident 6 month review  
32 Stroke medicine  
33 Cerebral infarct due to thrombosis of precerebral arteries  
34 Cerebral infarction due to embolism of precerebral arteries  
35 Cerebral infarction due to thrombosis of cerebral arteries  
36 Cerebral infarction due to embolism of cerebral arteries  
37 Sequelae of cerebral infarction  
38 [X]Other cerebral infarction  
39 Cerebral infarction  
40 Left sided cerebral infarction  
41 Right sided cerebral infarction  
42 Occlusion and stenosis of cerebral arteries, not resulting in cerebral infarction  
43 [X]Cerebrl infarctn due/unspcf occlusn or sten/cerebrl artr  
44 Cerebral infarction due to cerebral venous thrombosis, non-pyogenic  
45 Cerebral infarction due to occlusion of precerebral artery  
46 Cerebrl infarctn due/unspcf occlusn or sten/cerebrl artr  
47 Cerebral autosomal dominant arteriopathy with subcortical infarcts and leukoencephalopathy  
48 Cerebral infarction with haemorrhagic transformation  
49 Cause of Death- Cerebral Infarct  
50 Surveillance of Cerebral Palsy in Europe classification - predominant pattern B.2 - sequelae of intraventricular I

1  
2 Surveillance of Cerebral Palsy in Europe classification - predominant pattern C.3 - infarct of the middle cerebra  
3 Old cerebral infarction on imaging  
4 Cerebral infarction due to occlusion of cerebral artery  
5 Cerebral infarction due to stenosis of cerebral artery  
6 Anterior cerebral circulation infarction  
7 Total anterior cerebral circulation infarction  
8 TACI - Total anterior cerebral circulation infarction  
9 Partial anterior cerebral circulation infarction  
10 PACI - Partial anterior cerebral circulation infarction  
11 Posterior cerebral circulation infarction  
12 Haemorrhagic cerebral infarction  
13 Anterior cerebral circulation haemorrhagic infarction  
14 Posterior cerebral circulation haemorrhagic infarction  
15 Occipital cerebral infarction  
16 Cerebral infarction due to embolism of middle cerebral artery  
17 Cerebral infarction due to thrombosis of middle cerebral artery  
18 Silent cerebral infarct  
19 Sequela of ischaemic cerebral infarction  
20 Cerebral degeneration in mucopolysaccharidoses  
21 Cerebrovascular accident  
22 [V]Personal history of cerebrovascular accident (CVA)  
23 Cerebrovascular accident due to thrombus of left carotid artery  
24 Cerebrovascular accident due to thrombus of basilar artery  
25 Cerebrovascular accident due to thrombus of right carotid artery  
26 Cerebrovascular accident due to thrombus of right middle cerebral artery  
27 Cerebrovascular accident due to thrombus of left middle cerebral artery  
28 Cerebrovascular accident due to occlusion of left pontine artery  
29 Cerebrovascular accident due to occlusion of right posterior cerebral artery  
30 Cerebrovascular accident due to occlusion of left middle cerebral artery  
31 Cerebrovascular accident due to occlusion of left posterior cerebral artery  
32 Cerebrovascular accident due to occlusion of right middle cerebral artery  
33 Cerebrovascular accident due to occlusion of right middle cerebral artery by embolus  
34 CVA - cerebrovascular accident due to cerebral artery occlusion  
35 CVA - cerebrovascular accident in the puerperium  
36 CVA - Cerebrovascular accident  
37 History of cerebrovascular accident  
38 Suspected cerebrovascular accident  
39 Cerebrovascular accident care plan  
40 Left sided cerebral hemisphere cerebrovascular accident  
41 Right sided cerebral hemisphere cerebrovascular accident  
42 Extension of cerebrovascular accident  
43 Cerebrovascular accident annual review  
44 Cerebrovascular accident due to stenosis of bilateral carotid arteries  
45 History of embolic cerebrovascular accident  
46 History of cerebrovascular accident due to ischaemia  
47 Cerebrovascular accident due to occlusion of bilateral pontine arteries  
48 Acute cerebrovascular accident due to stenosis of left carotid artery  
49 Acute cerebrovascular accident due to occlusion of left middle cerebral artery  
50 Acute cerebrovascular accident due to occlusion of right posterior cerebral artery  
51 Acute cerebrovascular accident due to occlusion of right middle cerebral artery

1 Acute cerebrovascular accident due to occlusion of right carotid artery  
2 Acute cerebrovascular accident due to occlusion of left carotid artery  
3 Acute cerebrovascular accident of basal ganglia  
4 Acute cerebrovascular accident of brainstem  
5 Acute cerebrovascular accident due to stenosis of right carotid artery  
6 Acute cerebrovascular accident due to occlusion of right cerebellar artery  
7 Acute cerebrovascular accident due to ischaemia  
8 Acute cerebrovascular accident due to occlusion of left cerebellar artery  
9 Acute cerebrovascular accident due to embolism of right middle cerebral artery  
10 Acute cerebrovascular accident due to embolism of left middle cerebral artery  
11 Left sided CVA  
12 Right sided CVA  
13 H/O: CVA  
14 CVA annual review  
15 CVA unspecified  
16 [RFC] CVA  
17 Term  
18 paraplegia  
19 subacute combined degeneration of spinal cord  
20 amyotonia congenita  
21 infantile spinal muscular atrophy  
22 myotonic cataract  
23 tay-sach's disease  
24 pelizaeus-merzbacher disease  
25 tetraplegia - congenital  
26 toxic myopathy  
27 ocular muscular dystrophy  
28 moyamoya disease  
29 history of parkinson's disease  
30 steele-richardson-olszewski syndrome  
31 progressive supranuclear ophthalmoplegia  
32 progressive supranuclear palsy  
33 muscular dystrophy  
34 hereditary motor and sensory neuropathy type iii  
35 acute non-paralytic poliomyelitis  
36 alper's disease  
37 disseminated sclerosis  
38 hereditary motor and sensory neuropathy type iv  
39 myopathy in metabolic diseases  
40 brown-sequard syndrome  
41 eulenburg's disease  
42 myopathy due to thyrotoxicosis  
43 polyneuropathy in malignant disease  
44 fibrodysplasia ossificans congenita  
45 athetoid cerebral palsy  
46 [x]cerebral palsy and other paralytic syndromes  
47 nemaline body disease  
48 [x]other specified myopathies  
49 steele - richardson oszewski syndrome  
50 steele richardson olszewsk syn

1 steinert's disease  
2 cerebellar ataxia associated with another disorder  
3 inflammatory disorder of muscle  
4 myopathy or muscular dystrophy nos  
5 myopathy or muscular dystrophy nos  
6 duchenne muscular dystrophy  
7 central nervous system demyelination nos  
8 fxtas - fragile x associated tremor ataxia syndrome  
9 oculopharyngeal muscular dystrophy  
10 erb's muscular dystrophy  
11 pseudobulbar palsy  
12 spastic hemiplegia  
13 flaccid hemiplegia  
14 spielmeyer-vogt (batten) disease  
15 primary lateral sclerosis  
16 myotubular myopathy  
17 centronuclear myopathy  
18 progressive myositis ossificans  
19 adult spinal muscular atrophy  
20 anterior horn cell disease  
21 amyotrophic lateral sclerosis  
22 poikilodermatomyositis  
23 progressive muscular atrophy  
24 marchiafava-bignami disease  
25 becker muscular dystrophy  
26 central demyelination of corpus callosum  
27 becker's disease  
28 spinocerebellar disease  
29 myasthenia gravis  
30 secondary parkinsonism due to other external agents  
31 secondary parkinsonism, unspecified  
32 vanishing white matter disease  
33 axonal sensorimotor neuropathy  
34 management of ms in progressive disability phase  
35 relapsing and remitting multiple sclerosis  
36 mitoch myopath/encephalopath/lactic acidosis/stroke-like episode  
37 peho syndrome  
38 vanishing white matter disease  
39 early onset cerebellar ataxia with hypogonadism  
40 bethlem myopathy  
41 multi-core congenital myopathy  
42 dermatomyositis  
43 hereditary motor and sensory neuropathy  
44 acute poliomyelitis  
45 botulism  
46 facioscapulohumeral muscular dystrophy  
47 brown-sequard syndrome  
48 fragile x associated tremor ataxia syndrome  
49 juvenile dermatomyositis  
50 metachromatic leucodystrophy

1 congenital myopathy  
2 hereditary motor and sensory neuropathy type i  
3 hereditary motor and sensory neuropathy type ii  
4 congenital hereditary muscular dystrophy  
5 emery-dreifuss muscular dystrophy  
6 friedreich's ataxia  
7 spastic diplegic cerebral palsy  
8 spastic quadriplegic cerebral palsy  
9 other cerebral palsy  
10 cerebral palsy nos  
11 charcot-marie-tooth syndrome  
12 neuroferritinopathy  
13 amaurotic familial idiocy  
14 dejerine-sottas disease  
15 gross motor function classification system cerebral palsy  
16 pseudo - hurler's disease  
17 pseudohypertrophic dystrophy  
18 quadriplegia  
19 tetraplegia  
20 cerebral palsy  
21 acute infective polyneuritis  
22 stiff person syndrome  
23 postinfectious polyneuritis  
24 spastic hemiplegic cerebral palsy  
25 lambert-eaton syndrome  
26 pseudo - hurler's disease  
27 poliomyelitis & other non-arthropod-borne viral diseases-cns  
28 paraplegia - congenital  
29 neuroferritinopathy  
30 choreo-athetotic cerebral palsy  
31 choreoathetoid cerebral palsy  
32 bilateral spastic cerebral palsy  
33 paramyotonia congenita (eulenburg's disease)  
34 parkinsonism secondary to drugs  
35 balo's concentric sclerosis  
36 ataxic diplegic cerebral palsy  
37 h/o: poliomyelitis  
38 childhood type dermatomyositis  
39 postnatal infantile hemiplegia  
40 fisher's syndrome  
41 ophthalmoplegia, ataxia, areflexia syndrome  
42 miller-fisher variant of guillain-barre syndrome  
43 fisher syndrome  
44 pigmentary pallidal degeneration  
45 pigmentary pallidal atrophy  
46 o/e - hemiplegia  
47 o/e - paraplegia  
48 o/e - quadriplegia  
49 o/e - diplegia  
50 o/e - parkinsonian tremor



1 o/e - hemiplegic posture  
2 o/e - paraplegic in flexion  
3 o/e - paraplegic in extension  
4 o/e - parkinson flexion posture  
5 o/e - ataxic gait  
6 o/e - gait ataxic  
7 o/e - arms ataxic  
8 o/e - legs ataxic  
9 myositis ossificans associated with dermato / polymyositis  
10 parkinsonism caused by drug  
11 stiff-man syndrome  
12 moersch-woltmann syndrome  
13 gamma neuron overactivity syndrome  
14 moersch-woltman syndrome  
15 sma - spinal muscular atrophy  
16 demyelinating disorders of the central nervous system  
17 demyelinating cns disease  
18 demyelinating disease central nervous system (cns)  
19 proximal myotonic myopathy  
20 notification of acute polio  
21 paraplegic-spastic gait  
22 friedreich's ataxia  
23 friedreich's disease  
24 familial ataxia  
25 fa - friedreich ataxia  
26 secondary progressive multiple sclerosis  
27 primary progressive multiple sclerosis  
28 myopathy in hypopituitarism  
29 acute nonparalytic poliomyelitis  
30 anterior acute poliomyelitis specified as nonparalytic  
31 epidemic acute poliomyelitis specified as non paralytic  
32 anterior acute poliomyelitis, nonparalytic  
33 epidemic acute poliomyelitis, non paralytic  
34 ragged red myopathy  
35 other limb-girdle muscular dystrophy  
36 toxic neuromuscular junction disorder  
37 toxic myoneural junction disorder  
38 toxic disorders of the neuromuscular junction  
39 o/e - parkinson posture  
40 shy-drager syndrome  
41 alcoholic myopathic syndrome  
42 alcoholic myositis  
43 ataxia (loss of muscle coordination)  
44 progressive sclerosing poliodystrophy  
45 alpers' disease  
46 gray matter degeneration  
47 spongy glioneuronal dystrophy  
48 poliodystrophy  
49 progressive neuronal degeneration with liver cirrhosis  
50 multiple system atrophy, cerebellar variant

1 multiple system atrophy, parkinson variant  
2 listerial cerebral arteritis  
3 acute paralytic non-bulbar poliomyelitis  
4 acute paralytic poliomyelitis, unspecified  
5 acute paralytic poliomyelitis, vaccine-associated  
6 acute paralytic poliomyelitis, wild virus, imported  
7 acute paralytic poliomyelitis, wild virus, indigenous  
8 acute poliomyelitis nos  
9 gm>2< gangliosidosis, type 2  
10 hexosaminidase a and b deficiency  
11 total hexosaminidase deficiency  
12 [x]acute paralytic poliomyelitis, other and unspecified  
13 [x]acute poliomyelitis, unspecified  
14 ms - multiple sclerosis  
15 ds - disseminated sclerosis  
16 fragile x associated tremor ataxia syndrome  
17 subacute myelo-optic neuropathy  
18 devic syndrome  
19 optic neuromyelitis  
20 smon - subacute myelo-optico-neuropathy  
21 tabetic gait  
22 broadened gait  
23 phytanic acid storage disease  
24 heredopathia atactica polyneuritiformis  
25 refsum syndrome  
26 heredoataxia hemeralopica polyneuritiformis  
27 refsum-thiÃfÃfÃ,Ã©baut disease  
28 hereditary sensory-motor neuropathy, type iv  
29 refsum-thiebaut disease  
30 hereditary motor and sensory neuropathy, type iv  
31 hsmn iv  
32 heredoataxic atactica polyneuritiformis  
33 heredoataxic hemeralopica polyneuritiformis  
34 mitochondrial ocular myopathy  
35 gaucher's disease  
36 coproporphyrria  
37 [x]other gangliosidosis  
38 brown-sÃfÃfÃ,Ã©quard syndrome  
39 progressive supranuclear ophthalmoplegia  
40 psp - progressive supranuclear palsy  
41 subacute sclerosing panencephalitis  
42 dawson's inclusion body encephalitis  
43 poliomyelitis encephalitis  
44 myotonia chondrodystrophica  
45 osteochondromuscular dystrophy  
46 chondrodystrophic myotonia  
47 post polio vaccination encephalitis  
48 leucodystrophy  
49 krabbe's disease  
50 leucodystrophy nos

1 retinal dystrophy in cerebroretinal lipidosi  
2 parkinson's disease nos  
3 other basal ganglia degenerative diseases  
4 parkinsonism with orthostatic hypotension  
5 other basal ganglia degenerative disease nos  
6 dyssynergia cerebellaris myoclonica  
7 primary cerebellar degeneration nos  
8 cerebellar ataxia in diseases ec  
9 cerebellar ataxia due to neoplasia  
10 cerebellar ataxia in disease nos  
11 other spinocerebellar diseases  
12 other spinocerebellar disease nos  
13 spinocerebellar disease nos  
14 unspecified spinal muscular atrophy  
15 spinal muscular atrophy nos  
16 motor neurone disease nos  
17 other anterior horn cell disease  
18 anterior horn cell disease nos  
19 multiple sclerosis of the spinal cord  
20 generalised multiple sclerosis  
21 exacerbation of multiple sclerosis  
22 multiple sclerosis nos  
23 other central nervous system demyelinating diseases  
24 other specified central nervous system demyelinating disease  
25 other specified central nervous system demyelination nos  
26 central nervous system demyelination nos  
27 hemiplegia nos  
28 congenital paraplegia  
29 congenital diplegia nos  
30 infantile hemiplegia nos  
31 other congenital cerebral palsy  
32 ataxic infantile cerebral palsy  
33 other infantile cerebral palsy nos  
34 congenital cerebral palsy nos  
35 flaccid tetraplegia  
36 spastic tetraplegia  
37 flaccid paraplegia  
38 spastic paraplegia  
39 peroneal muscular atrophy nos  
40 neuropathy in association with hereditary ataxia  
41 acute infective polyneuritis nos  
42 infantile necrotizing encephalomyelopathy  
43 subacute necrotizing encephalopathy  
44 subacute necrotizing encephalomyelopathy  
45 subacute necrotising encephalomyelopathy  
46 subacute necrotising encephalopathy  
47 infantile necrotising encephalomyelopathy  
48 snem - subacute necrotising encephalomyelopathy  
49 snem - subacute necrotizing encephalomyelopathy  
50 leigh syndrome

1 leigh disease  
2 leighs disease  
3 polyneuropathy in porphyria  
4 juvenile or adult myasthenia gravis  
5 myasthenia gravis nos  
6 myasthenic syndrome due to disease ec  
7 myasthenic syndrome due to other malignancy  
8 myasthenic syndrome due to hypothyroidism  
9 myasthenic syndrome due to pernicious anaemia  
10 myasthenic syndrome due to thyrotoxicosis  
11 myasthenic syndrome due to disease nos  
12 congenital and developmental myasthenia  
13 myoneural disorder nos  
14 muscular dystrophies and other myopathies  
15 benign congenital myopathy  
16 congenital hereditary muscular dystrophy nos  
17 hereditary progressive muscular dystrophy  
18 pelvic muscular dystrophy  
19 hereditary progressive muscular dystrophy nos  
20 infantile myotonia  
21 other specified myotonic disorder  
22 myotonic disorder nos  
23 striatonigral atrophy  
24 snd - striatonigral degeneration  
25 myopathy due to endocrine disease ec  
26 myopathy due to endocrine disease nos  
27 symptomatic inflammatory myopathy in disease ec  
28 myopathy due to disseminated lupus erythematosus  
29 myopathy due to polyarteritis nodosa  
30 myopathy due to rheumatoid arthritis  
31 myopathy due to sarcoidosis  
32 myopathy due to scleroderma  
33 myopathy due to sjogren's disease  
34 symptomatic inflammatory myopathy in disease nos  
35 proximal myopathy  
36 other myopathies and muscular dystrophies  
37 myopathy or muscular dystrophy nos  
38 multiple sclerosis review  
39 [x]other hereditary ataxias  
40 [x]other inherited spinal muscular atrophy  
41 [x]other spinal muscular atrophies and related syndromes  
42 [x]paraneoplastic neuromyopathy and neuropathy  
43 [x]other drug-induced secondary parkinsonism  
44 [x]other secondary parkinsonism  
45 [x]parkinsonism in diseases classified elsewhere  
46 [x]secondary parkinsonism, unspecified  
47 [x]secondary parkinsonism due to other external agents  
48 [x]demyelinating diseases of the central nervous system  
49 [x]other specified acute disseminated demyelination  
50 [x]acute disseminated demyelination, unspecified

1 [x]diseases of myoneural junction and muscle  
2 [x]other specified myoneural disorders  
3 [x]other primary disorders of muscles  
4 [x]other specified myopathies  
5 [x]myopathy in endocrine diseases classified elsewhere  
6 [x]myopathy in metabolic diseases classified elsewhere  
7 [x]myopathy in other diseases classified elsewhere  
8 [x]mitochondrial myopathy, not elsewhere classified  
9 [x]inflammatory myopathy, not elsewhere classified  
10 [x]cerebral palsy and other paralytic syndromes  
11 [x]other infantile cerebral palsy  
12 multiple sclerosis care plan agreed  
13 post poliomyelitis syndrome  
14 postpolio muscular atrophy  
15 post-polio progressive muscular atrophy  
16 progressive muscular atrophy following poliomyelitis  
17 dissection of cerebral arteries, nonruptured  
18 neuromyositis  
19 pm - polymyositis  
20 [x]cerebral arteritis in infectious and parasitic diseases  
21 [d]post polio exhaustion  
22 lung disease with polymyositis  
23 parkinsonism  
24 disorders presenting primarily with parkinsonism  
25 myopathy in addison's disease  
26 myopathy in addison disease  
27 motor neuron disease  
28 mnd - motor neurone disease  
29 other specific muscle disorder  
30 other specific muscle disorder nos  
31 osteopathy from poliomyelitis  
32 poliomyelitis osteopathy of unspecified site  
33 poliomyelitis osteopathy of the shoulder region  
34 poliomyelitis osteopathy of the upper arm  
35 poliomyelitis osteopathy of the forearm  
36 poliomyelitis osteopathy of the hand  
37 poliomyelitis osteopathy of the pelvic region and thigh  
38 poliomyelitis osteopathy of the lower leg  
39 poliomyelitis osteopathy of the ankle and foot  
40 poliomyelitis osteopathy of other specified sites  
41 poliomyelitis osteopathy of multiple sites  
42 poliomyelitis osteopathy nos  
43 [x]other dermatomyositis  
44 [x]dermatopolymyositis, unspecified  
45 [x]other specified disorders of muscle  
46 strumpell-lorrain disease  
47 familial spastic paraplegia syndrome  
48 hsp - hereditary spastic paraplegia  
49 strumpell disease  
50 spastic congenital paraplegia

1 juvenile myopathy, encephalopathy, lactic acidosis and stroke  
2 melas - mitochondrial myopathy, encephalopathy, lactic acidosis and stroke-like episodes  
3 mitochondrial myopathy, encephalopathy, lactic acidosis and stroke-like episodes  
4 multiple sclerosis multidisciplinary review  
5 guillain-barré syndrome  
6 landry-guillain-barré syndrome  
7 ascending paralysis  
8 landry-guillain-barre syndrome  
9 acute inflammatory demyelinating polyradiculoneuropathy  
10 acute idiopathic polyradiculoneuritis  
11 acute idiopathic polyneuritis  
12 acute post-infective radiculoneuropathy  
13 acute inflammatory neuropathy  
14 guillain barre syndrome  
15 eulenbug syndrome  
16 eulenbug disease  
17 [d]ataxic gait  
18 [d]ataxia nos  
19 paroxysmal non-kinesigenic dyskinesia  
20 central core myopathy  
21 corticostriatal spinal degeneration  
22 roussy-lãvy syndrome  
23 hereditary ataxia-muscular atrophy syndrome  
24 progressive external ophthalmoplegia  
25 graefe's disease  
26 chronic progressive ophthalmoplegia  
27 cpeo - chronic progressive external ophthalmoplegia  
28 peo - progressive external ophthalmoplegia  
29 ataxia with lactic acidosis i  
30 ataxia with lactic acidosis  
31 marie cerebellar ataxia  
32 quadriplegic cerebral palsy  
33 tetraplegic cerebral palsy  
34 cerebral palsy with spastic tetraplegia  
35 tetraplegic spastic cerebral palsy  
36 quadriplegic spastic cerebral palsy  
37 paralysis agitans  
38 shaking palsy  
39 idiopathic parkinson's disease  
40 parkinson disease  
41 pd - parkinson's disease  
42 parkinsons disease  
43 primary parkinsonism  
44 idiopathic parkinsonism  
45 hemiplegia (paralysis on one side)  
46 ganglioside accumulation in nervous tissue lysosomes  
47 ganglioside storage disease  
48 postencephalitic parkinsonism  
49 myopathy in cushing's disease  
50 myopathy in cushing disease

1 upper diplegia  
2 kugelberg-welander disease  
3 familial spinal muscular atrophy  
4 spinal muscular atrophy, type iii  
5 sma3  
6 sma type iii  
7 spinal muscular atrophy type iii  
8 bulbar paralysis  
9 bulbar palsy  
10 pbp - progressive bulbar palsy  
11 monoplegic cerebral palsy  
12 myasthenic syndrome  
13 lambert-eaton myasthenic syndrome  
14 lems - lambert-eaton myasthenic syndrome  
15 congenital myotonia, autosomal dominant form  
16 thomsen's disease  
17 thomsen myotonia congenita  
18 endocrine myopathy  
19 muscle disease related to endocrine disease  
20 muscle disorders associated with endocrine disease  
21 diplegic cerebral palsy  
22 spastic diplegic cerebral palsy  
23 variegate porphyria  
24 south african porphyria  
25 south african genetic porphyria  
26 protocoproporphyrinemia  
27 dean-barnes syndrome  
28 mixed porphyria  
29 protoporphyria  
30 protoporphyria  
31 vp - variegate porphyria  
32 porphyria variegata  
33 sphingomyelin/cholesterol lipidosis  
34 neuronal cholesterol lipidosis  
35 sphingomyelinase deficiency  
36 sphingomyelin lipidosis  
37 early onset cerebellar ataxia with hypogonadism  
38 kennedy syndrome  
39 vascular parkinsonism  
40 multiple system atrophy  
41 subacute necrotizing myelitis  
42 concentric sclerosis  
43 distal muscular dystrophy  
44 axonal sensorimotor neuropathy  
45 cerebral amyloid angiopathy  
46 infantile cerebral palsy  
47 spastic cerebral palsy  
48 dyskinetic cerebral palsy  
49 paralysis of both lower limbs  
50 lower paraplegia  
51 paraplegia (complete or partial paralysis of legs)

1 late effects of acute poliomyelitis  
2 posterolateral sclerosis  
3 vitamin b>12< deficiency disease of spinal cord  
4 putnam-dana syndrome  
5 lichtheim's disease  
6 neuromyelopathy due to vitamin b12 deficiency  
7 sacd - subacute combined degeneration  
8 vitamin b>12< deficiency neuropathy  
9 secondary myopathy  
10 batten-mayou disease  
11 spielmeyer-vogt disease  
12 amaurotic idiocy, juvenile type  
13 cerebral lipidosis, myoclonic variant  
14 batten-spielmeier-vogt disease  
15 cerebral lipidosis myoclonic variant  
16 batten-mayou syndrome  
17 amaurotic idiocy juvenile type  
18 spielmeyer-vogt type neuronal ceroid lipofuscinosis  
19 myasthenia angiosclerotica  
20 cockayne syndrome  
21 werdnig-hoffmann disease  
22 progressive muscular atrophy of infancy  
23 spinal muscular atrophy, type i  
24 spinal muscular atrophy type i  
25 whd - werdnig-hoffmann disease  
26 acute paralytic poliomyelitis, bulbar  
27 acute infantile paralysis  
28 acute anterior poliomyelitis  
29 acute anterior bulbar polioencephalomyelitis  
30 sudanophilic leukodystrophy  
31 lipofuscinosis nec  
32 mucopolipidosis iii  
33 pseudo-hurler disease  
34 pseudo-hurler's disease  
35 dermatopolymyositis in neoplastic disease  
36 hauptmann-thannhauser muscular dystrophy  
37 familial hypokalaemic periodic paralysis  
38 drug-induced myopathy  
39 kiloh-nevin syndrome  
40 ocular myopathy  
41 olivopontocerebellar degeneration  
42 thyrotoxic myopathy  
43 ataxia-telangiectasia syndrome  
44 louis-bar syndrome  
45 ataxia telangiectasia syndrome  
46 dissociative ataxia  
47 carcinomatous myopathic syndrome  
48 myopathy associated with malignant disease  
49 md - muscular dystrophy  
50 progressive muscular dystrophy



1  
2 pmd - progressive muscular dystrophy  
3 dentato-rubral atrophy syndrome  
4 hunt's disease  
5 dentate cerebellar ataxia  
6 [x]cerebral arteritis in other diseases ce  
7 nemaline myopathy  
8 rod myopathy  
9 rod-body myopathy  
10 pseudohypertrophic muscular dystrophy  
11 dmd - duchenne muscular dystrophy  
12 oculopharyngeal dystrophy  
13 carcinomatous peripheral neuropathy  
14 carcinomatous neuropathy  
15 paraneoplastic polyneuropathy  
16 [x]dermato(poly)myositis in neoplastic disease ce  
17 steinert myotonic dystrophy syndrome  
18 steinert syndrome  
19 dystrophia myotonica  
20 dm - dystrophia myotonica  
21 myotonia dystrophica  
22 erb muscular dystrophy  
23 titubant ataxic gait  
24 myoneural disorders  
25 mÃ¶nchmeyer disease  
26 diffuse progressive ossifying polymyositis  
27 fibrodysplasia ossificans progressiva  
28 fop - fibrodysplasia ossificans progressiva  
29 myositis ossificans progressiva  
30 familial hypokalemic periodic paralysis  
31 hypokalemic periodic paralysis  
32 hypokalaemic periodic paralysis  
33 periodic paralysis i  
34 cerebellar ataxia (loss of muscle coordination)  
35 adult spinal muscular atrophy  
36 generalized spinal muscular atrophy of late onset  
37 generalised spinal muscular atrophy of late onset  
38 adult onset spinal muscular atrophy  
39 bulbar motor neuron disease  
40 lou gehrig's disease  
41 als - amyotrophic lateral sclerosis  
42 hypothyroid myopathy  
43 myxedema myopathy  
44 myxoedema myopathy  
45 amyotrophy  
46 muscular atrophy  
47 duchenne-aran muscular atrophy  
48 pure progressive muscular atrophy  
49 pma - progressive muscular atrophy  
50 primary cerebellar degeneration  
51 erb-goldflam disease

1 mg - myasthenia gravis  
 2 [x]myasthenic syndromes in endocrine diseases ce  
 3 [x]myasthenic syndromes/other diseases classified elsewhere  
 4 [x]myopathy/infectious+parasitic diseases ce  
 5 cerebellar ataxia nos  
 6 [x]myositis in protozoal and parasitic infections ce  
 7 other specific myoneural disorder  
 8 other specified hereditary progressive muscular dystrophy  
 9 familial periodic paralysis  
 10 lipofuscinosis nos  
 11 sandhoff disease  
 12 limb-girdle muscular dystrophy  
 13 leyden-mãfãfã,ã¶bius muscular dystrophy  
 14 o/e-festination-parkinson gait  
 15 o/e - festination  
 16 o/e - parkinson gait  
 17 [x]other disorders of muscle in diseases ce  
 18 congenital cerebral palsy  
 19 congenital spastic cerebral palsy  
 20 congenital quadriplegia  
 21 congenital diplegia  
 22 o/e - ataxia  
 23 [x]other myasthenic syndromes in neoplastic disease ce  
 24 multiple sclerosis  
 25 [x]other specified degenerative diseases/the basal ganglia  
 26 [x]other specified demyelinating diseases/the CNS  
 27 right hemiplegia  
 28 left hemiplegia  
 29 late effects of poliomyelitis  
 30 sequelae of poliomyelitis  
 31 sequela of infection caused by human poliovirus  
 32 neuromyelitis optica  
 33 devic's disease  
 34 dãfãfã,ã©jãfãfã,ã©rine-sottas disease  
 35 hereditary sensory-motor neuropathy, type iii  
 36 hereditary hypertrophic neuropathy  
 37 progressive hypertrophic interstitial neuropathy  
 38 hereditary motor and sensory neuropathy, type iii  
 39 hsmn iii  
 40 hmsn iii  
 41 hypertrophic hereditary neuropathy  
 42 hypertrophic demyelinating neuropathy of infancy  
 43 emd - emery-dreifuss muscular dystrophy  
 44 benign scapulooperoneal muscular dystrophy with early contractures  
 45 [x]polyneuropathy in neoplastic disease ce  
 46 refsum's disease  
 47 [x]sequelae of poliomyelitis  
 48 [x]subacute combined degeneration/spinal cord in diseases ce  
 49 [x]systemic atrophies primarily affecting the CNS  
 50 [x]systemic atrophy affecting the CNS in other diseases ce

1  
2 cp - cerebral palsy  
3 cerebral palsy (cp)  
4 inflammatory myopathy  
5 myopathic disease  
6 myopathy  
7 porphyric polyneuropathy  
8 neuromyotonia  
9  
10 roussy-levy syndrome  
11 cerebral palsy, not congenital or infantile, acute  
12 history of poliomyelitis  
13 acute disseminated demyelination, unspecified  
14 on examination - hemiplegia  
15 on examination - paraplegia  
16 on examination - quadriplegia  
17 o/e - tetraplegia  
18 on examination - tetraplegia  
19 on examination - diplegia  
20 on examination - parkinsonian tremor  
21 on examination - hemiplegic posture  
22 on examination - paraplegic in flexion  
23 on examination - paraplegic in extension  
24 on examination - parkinson flexion posture  
25 on examination - gait ataxic  
26 on examination - arms ataxic  
27 on examination - legs ataxic  
28 spinal paralytic poliomyelitis  
29 cerebral arteritis  
30 gaucher's disease  
31 cerebroside lipidosis syndrome  
32 glucocerebrosidase deficiency  
33 kerafin histiocytosis  
34 gaucher splenomegaly  
35 kerafin lipoidosis  
36 glucocerebrosidosis  
37 gaucher syndrome  
38 glucosylceramidase deficiency  
39 glucosylceramide beta-glucosidase deficiency  
40 alcoholic myopathy  
41 sspe - subacute sclerosing panencephalitis  
42 dawson's inclusion body encephalitis  
43 leukodystrophy  
44 galactosylceramide beta-galactosidase deficiency  
45 krabbe's leukodystrophy  
46 globoid cell leucodystrophy  
47 krabbe leucodystrophy  
48 gcl - globoid cell leucodystrophy  
49 krabbe disease  
50 galactocerebroside beta-galactosidase deficiency  
51 diffuse globoid cell cerebral sclerosis  
52 b variant hexosaminidase a deficiency  
53  
54  
55  
56  
57  
58  
59  
60

1 myxoedema cerebellar degeneration  
2 myxedema cerebellar degeneration  
3 paraneoplastic cerebellar degeneration  
4 multiple sclerosis of the brainstem  
5 brain stem multiple sclerosis  
6 generalized multiple sclerosis  
7 multiple sclerosis (ms) exacerbation  
8 hypotonic cerebral palsy  
9 spastic quadriplegia  
10 post-infectious polyneuritis  
11 myasthenic syndrome due to another disorder  
12 myasthenic syndrome due to pernicious anemia  
13 distal muscular dystrophy with juvenile onset  
14 symptomatic inflammatory myopathy associated with another disorder  
15 amyloid myopathy  
16 sarcoid myopathy  
17 myopathy due to systemic sclerosis  
18 myopathy due to sjögren's disease  
19 myopathy due to sjögren disease  
20 myopathy due to sjogrens disease  
21 cerebellar ataxia due to alcoholism  
22 lung disease co-occurrent with polymyositis  
23 polymyositis with pulmonary involvement  
24 miller-fisher syndrome  
25 cerebral ataxia  
26 poliomyelitis osteopathy of the pelvic region and/or thigh  
27 poliomyelitis osteopathy of the ankle and/or foot  
28 progressive supranuclear ophthalmoplegia  
29 progressive supranuclear palsy  
30 steele-richardson-olszewski syndrome  
31 neuralgic amyotrophy  
32 motor neurone disease  
33 tropical spastic paraplegia  
34 leigh's disease  
35 striatonigral degeneration  
36 tabes dorsalis - neurosyphilis  
37 syphilitic posterior spinal sclerosis  
38 ataxia-telangiectasia  
39 athetoid cerebral palsy  
40 thomsen's disease  
41 subacute combined degeneration  
42 oppenheim's amyotonia  
43 acute paralytic bulbar poliomyelitis  
44 system disorder of the nervous system  
45 bulbospinal neuronopathy  
46 x-linked bulbospinal atrophy  
47 bulbospinal muscular atrophy  
48 secondary parkinson's disease  
49 secondary parkinson disease  
50 msa - multiple system atrophy

1  
2 autosomal dominant late onset basal ganglia degeneration  
3 subacute necrotizing myelitis  
4 balo concentric sclerosis  
5 balo's concentric sclerosis  
6 balos concentric sclerosis  
7 landau-kleffner syndrome  
8 caa - cerebral amyloid angiopathy  
9 congophilic angiopathy  
10 periventricular leukoencephalopathy  
11 pyramidal cerebral palsy  
12 congenital spastic paralysis  
13 spastic infantile paralysis  
14 little's disease  
15 infantile spastic cerebral palsy  
16 batten's disease of retina  
17 dermatomyositis with malignant disease  
18 postpolio syndrome  
19 polymyositis  
20 combined disorder of muscle and peripheral nerve  
21 neuromuscular disorder  
22 carotico-cavernous sinus fistula  
23 cerebellar ataxia due to myxoedema  
24 cerebral lipidoses  
25 cerebral palsy with spastic diplegia  
26 myoplegic dystrophy  
27 familial recurrent paralysis  
28 familial myoplegia  
29 cavarre disease  
30 periodic myotonia  
31 on examination - festination-parkinson gait  
32 x-linked bulbo-spinal atrophy  
33 idiopathic progressive polyneuropathy  
34 congenital tetraplegia  
35 on examination - ataxia  
36 It - left hemiplegia  
37 congenital non-progressive ataxia  
38 ataxic cerebral palsy  
39 cockayne's syndrome  
40 congenital nonprogressive ataxia  
41 carotid cavernous fistula  
42 ccf - carotid cavernous fistula  
43 continuous muscle fiber activity  
44 continuous muscle fibre activity  
45 werdnig - hoffmann disease  
46 tabes dorsalis  
47 duchenne's disease  
48 hallervorden-spatz disease  
49 dermatopolymyositis, unspecified  
50 distal (gower's) muscular dystrophy  
51 distal dystrophy

1 drug induced parkinsonism  
2 duchenne aran muscular atrophy  
3 sanger-brown cerebellar ataxia  
4 dystrophia myotonica (steinert's disease)  
5 encephalitis due to poliomyelitis  
6 encephalitis due to subacute sclerosing panencephalitis  
7 benign multiple sclerosis  
8 malignant multiple sclerosis  
9 marchiafava disease  
10 bmd - becker muscular dystrophy  
11 becker's muscular dystrophy  
12 benign duchenne muscular dystrophy  
13 syphilitic parkinsonism  
14 wagner-unverricht syndrome  
15 polymyositis with skin involvement  
16 dm - dermatomyositis  
17 metachromatic leukodystrophy  
18 sulphatide lipidosis  
19 sulfatide lipidosis  
20 mld  
21 metachromatic leukoencephaly  
22 van bogaert-nijssen disease  
23 familial progressive cerebral sclerosis  
24 mld - metachromatic leucodystrophy  
25 charcot-marie-tooth disease, type i  
26 hereditary sensory-motor neuropathy, type i  
27 peroneal muscular atrophy of demyelinating type  
28 inherited dominant hypertrophic neuropathy  
29 charcot-marie-tooth disease of demyelinating type  
30 hsmn, type i  
31 charcot marie tooth disease, type 1  
32 hereditary sensory and motor neuropathy  
33 hereditary sensory-motor neuropathy  
34 hsmn  
35 hmsn  
36 hmsn - hereditary motor and sensory neuropathy  
37 hsmn - hereditary sensory and motor neuropathy  
38 hereditary sensorimotor neuropathy  
39 polio  
40 pm - poliomyelitis  
41 poliomyelitis  
42 charcot-marie-tooth disease, type ii  
43 inherited neuronal peroneal muscular atrophy  
44 peroneal muscular atrophy of neuronal type  
45 charcot marie tooth disease, type 2  
46 extraocular muscle myopathy  
47 extrapyramidal disease excluding parkinson's disease  
48 lame sickness  
49 infection due to clostridium botulinum  
50 infection caused by clostridium botulinum  
51  
52  
53  
54  
55  
56  
57  
58  
59  
60

1 facioscapulohumeral atrophy  
2 fsh - facioscapulohumeral muscular dystrophy  
3 landouzy-déjerine muscular dystrophy  
4 landouzy-dejerine muscular dystrophy  
5 fshd - facioscapulohumeral muscular dystrophy  
6 fmd - facioscapulohumeral muscular dystrophy  
7 fascioscapulohumeral muscular dystrophy  
8 hereditary spastic paraplegia  
9 myopathy due to addison's disease  
10 myopathy due to amyloid  
11 myopathy due to cushing's syndrome  
12 myopathy due to hypopituitarism  
13 myopathy due to malignant disease  
14 myopathy due to myxoedema  
15 myotonia congenita (thomsen's disease)  
16 myotonic chondrodysplasia  
17 myotonic disorders  
18 guillain-barre syndrome  
19 myasthenic syndrome due to botulism  
20 polymyositis ossificans  
21 multiple sclerosis of the brain stem  
22 mucopolysaccharidosis type iii  
23 management of multiple sclerosis in onset phase  
24 management of multiple sclerosis in early disease phase  
25 management of multiple sclerosis in stable disability phase  
26 management of multiple sclerosis in palliative phase  
27 mitochondrial myopathy, not elsewhere classified  
28 multiple sclerosis (ms) secondary progressive  
29 multiple sclerosis (ms) relapsing remitting  
30 multiple sclerosis (ms) primary progressive  
31 congenital nonprogressive myopathy with moebius and robin sequences  
32 massive muscular calcification associated with paraplegia  
33 central core disease  
34 congenital hemiplegia  
35 multiple system atrophy, parkinson's variant  
36 corticostriatal-spinal degeneration  
37 louis - bar syndrome  
38 fxtas - fragile x associated tremor ataxia syndrome  
39 locomotor ataxia  
40 little's disease  
41 kugelberg - welfer disease  
42 flaccid infantile cerebral palsy  
43 gmfc (gross motor function classification system) for cerebral palsy  
44 progressive external ophthalmoplegia  
45 human t-cell lymphotropic virus 1-associated myelopathy  
46 htlv-i-associated myelopathy  
47 tropical spastic paraparesis  
48 myelopathy caused by human t-lymphotropic virus 1  
49 myotonic dystrophy type 2  
50 benign autosomal dominant myopathy

1 inflammatory myopathy, not elsewhere classified  
2 marie's cerebellar ataxia  
3 hereditary cerebellar ataxia  
4 parkinson's disease  
5 paralysis agitans  
6 history of parkinson disease  
7  
8  
9 scpe (surveillance of cerebral palsy in europe) predominant pattern classification a - maldevelopment  
10 scpe (surveillance of cerebral palsy in europe) predominant pattern classification b - predominant white matter  
11 scpe (surveillance of cerebral palsy in europe) predominant pattern classification c - predominant grey matter  
12 scpe (surveillance of cerebral palsy in europe) predominant pattern classification d - unspecified  
13 scpe (surveillance of cerebral palsy in europe) predominant pattern classification a.1.1 - disorder of proliferative  
14 scpe (surveillance of cerebral palsy in europe) predominant pattern classification a.1.2 - disorder of migration  
15 scpe (surveillance of cerebral palsy in europe) predominant pattern classification a.1.3 - disorder of organisational  
16 scpe (surveillance of cerebral palsy in europe) predominant pattern classification a.2 - unspecified maldevelopment  
17 scpe (surveillance of cerebral palsy in europe) predominant pattern classification b.1 - periventricular leukomalacia  
18 scpe (surveillance of cerebral palsy in europe) predominant pattern classification b.2 - sequelae of intraventricular  
19 scpe (surveillance of cerebral palsy in europe) predominant pattern classification b.3 - combination of periventricular  
20 scpe (surveillance of cerebral palsy in europe) predominant pattern classification e - normal  
21 scpe (surveillance of cerebral palsy in europe) predominant pattern classification c.1 - basal ganglia and thalamic  
22 scpe (surveillance of cerebral palsy in europe) predominant pattern classification c.2 - parasagittal lesions  
23 scpe (surveillance of cerebral palsy in europe) predominant pattern classification c.3 - infarct of the middle cerebral  
24  
25  
26 degenerative disease of basal ganglia  
27 peroneal muscular atrophy  
28 charcot-marie-tooth disease  
29 hemiplegia  
30 gangliosidosis  
31 right hemiplegia  
32 left hemiplegia  
33 secondary parkinsonism - drugs  
34 other myoneural disorders  
35 myopathy nos  
36 diplegia of upper limbs  
37 juvenile spinal muscular atrophy  
38 progressive bulbar palsy  
39 [rfc] multiple sclerosis  
40 [rfc] motor neurone disease  
41 [rfc] parkinson's disease  
42 [rfc] paraplegias  
43 [rfc] cerebral palsy  
44 [rfc] cerebral palsy  
45 [rfc] multiple sclerosis  
46 [rfc] motor neurone disease  
47 [rfc] parkinson's disease  
48 eaton-lambert syndrome  
49 protocoproporphyrinuria  
50 stiff-man syndrome  
51 spinal muscular atrophy  
52 multiple sclerosis - personal health plan  
53 multiple sclerosis - multidisciplinary review  
54 multiple sclerosis - review



- 1
- 2 multiple sclerosis - primary progressive
- 3 multiple sclerosis - secondary progressive
- 4 multiple sclerosis - relapsing remitting
- 5 toxic myoneural disorder
- 6
- 7
- 8
- 9
- 10
- 11
- 12
- 13
- 14
- 15
- 16
- 17
- 18
- 19
- 20
- 21
- 22
- 23
- 24
- 25
- 26
- 27
- 28
- 29
- 30
- 31
- 32
- 33
- 34
- 35
- 36
- 37
- 38
- 39
- 40
- 41
- 42
- 43
- 44
- 45
- 46
- 47
- 48
- 49
- 50
- 51
- 52
- 53
- 54
- 55
- 56
- 57
- 58
- 59
- 60

For peer review only

1  
2  
3  
4  
5  
6  
7  
8  
9  
10  
11  
12  
13  
14  
15  
16  
17  
18  
19  
20  
21  
22  
23  
24  
25  
26  
27  
28  
29  
30  
31  
32  
33  
34  
35  
36  
37  
38  
39  
40  
41  
42  
43  
44  
45  
46  
47  
48  
49  
50  
51  
52  
53  
54  
55  
56  
57  
58  
59  
60

For peer review only

1  
2  
3  
4  
5  
6  
7  
8  
9  
10  
11  
12  
13  
14  
15  
16  
17  
18  
19  
20  
21  
22  
23  
24  
25  
26  
27  
28  
29  
30  
31  
32  
33  
34  
35  
36  
37  
38  
39  
40  
41  
42  
43  
44  
45  
46  
47  
48  
49  
50  
51  
52  
53  
54  
55  
56  
57  
58  
59  
60

For peer review only

1  
2  
3  
4  
5  
6  
7  
8  
9  
10  
11  
12  
13  
14  
15  
16  
17  
18  
19  
20  
21  
22  
23  
24  
25  
26  
27  
28  
29  
30  
31  
32  
33  
34  
35  
36  
37  
38  
39  
40  
41  
42  
43  
44  
45  
46  
47  
48  
49  
50  
51  
52  
53  
54  
55  
56  
57  
58  
59  
60

For peer review only

1  
2  
3  
4  
5  
6  
7  
8  
9  
10  
11  
12  
13  
14  
15  
16  
17  
18  
19  
20  
21  
22  
23  
24  
25  
26  
27  
28  
29  
30  
31  
32  
33  
34  
35  
36  
37  
38  
39  
40  
41  
42  
43  
44  
45  
46  
47  
48  
49  
50  
51  
52  
53  
54  
55  
56  
57  
58  
59  
60

For peer review only

1  
2  
3  
4  
5  
6  
7  
8  
9  
10  
11  
12  
13  
14  
15  
16  
17  
18  
19  
20  
21  
22  
23  
24  
25  
26  
27  
28  
29  
30  
31  
32  
33  
34  
35  
36  
37  
38  
39  
40  
41  
42  
43  
44  
45  
46  
47  
48  
49  
50  
51  
52  
53  
54  
55  
56  
57  
58  
59  
60

For peer review only

1  
2  
3  
4  
5  
6  
7  
8  
9  
10  
11  
12  
13  
14  
15  
16  
17  
18  
19  
20  
21  
22  
23  
24  
25  
26  
27  
28  
29  
30  
31  
32  
33  
34  
35  
36  
37  
38  
39  
40  
41  
42  
43  
44  
45  
46  
47  
48  
49  
50  
51  
52  
53  
54  
55  
56  
57  
58  
59  
60

For peer review only

1  
2  
3  
4  
5  
6  
7  
8  
9  
10  
11  
12  
13  
14  
15  
16  
17  
18  
19  
20  
21  
22  
23  
24  
25  
26  
27  
28  
29  
30  
31  
32  
33  
34  
35  
36  
37  
38  
39  
40  
41  
42  
43  
44  
45  
46  
47  
48  
49  
50  
51  
52  
53  
54  
55  
56  
57  
58  
59  
60

For peer review only



1  
2  
3  
4  
5  
6  
7  
8  
9  
10  
11  
12  
13  
14  
15  
16  
17  
18  
19  
20  
21  
22  
23  
24  
25  
26  
27  
28  
29  
30  
31  
32  
33  
34  
35  
36  
37  
38  
39  
40  
41  
42  
43  
44  
45  
46  
47  
48  
49  
50  
51  
52  
53  
54  
55  
56  
57  
58  
59  
60

For peer review only

1  
2  
3  
4  
5  
6  
7  
8  
9  
10  
11  
12  
13  
14  
15  
16  
17  
18  
19  
20  
21  
22  
23  
24  
25  
26  
27  
28  
29  
30  
31  
32  
33  
34  
35  
36  
37  
38  
39  
40  
41  
42  
43  
44  
45  
46  
47  
48  
49  
50  
51  
52  
53  
54  
55  
56  
57  
58  
59  
60

For peer review only

1  
2  
3  
4  
5  
6  
7  
8  
9  
10  
11  
12  
13  
14  
15  
16  
17  
18  
19  
20  
21  
22  
23  
24  
25  
26  
27  
28  
29  
30  
31  
32  
33  
34  
35  
36  
37  
38  
39  
40  
41  
42  
43  
44  
45  
46  
47  
48  
49  
50  
51  
52  
53  
54  
55  
56  
57  
58  
59  
60

For peer review only

1  
2  
3  
4  
5  
6  
7  
8  
9  
10  
11  
12  
13  
14  
15  
16  
17  
18  
19  
20  
21  
22  
23  
24  
25  
26  
27  
28  
29  
30  
31  
32  
33  
34  
35  
36  
37  
38  
39  
40  
41  
42  
43  
44  
45  
46  
47  
48  
49  
50  
51  
52  
53  
54  
55  
56  
57  
58  
59  
60

For peer review only

1  
2  
3  
4  
5  
6  
7  
8  
9  
10  
11  
12  
13  
14  
15  
16  
17  
18  
19  
20  
21  
22  
23  
24  
25  
26  
27  
28  
29  
30  
31  
32  
33  
34  
35  
36  
37  
38  
39  
40  
41  
42  
43  
44  
45  
46  
47  
48  
49  
50  
51  
52  
53  
54  
55  
56  
57  
58  
59  
60

For peer review only

1  
2  
3  
4  
5  
6  
7  
8  
9  
10  
11  
12  
13  
14  
15  
16  
17  
18  
19  
20  
21  
22  
23  
24  
25  
26  
27  
28  
29  
30  
31  
32  
33  
34  
35  
36  
37  
38  
39  
40  
41  
42  
43  
44  
45  
46  
47  
48  
49  
50  
51  
52  
53  
54  
55  
56  
57  
58  
59  
60

For peer review only

1  
2  
3  
4  
5  
6  
7  
8  
9  
10  
11  
12  
13  
14  
15  
16  
17  
18  
19  
20  
21  
22  
23  
24  
25  
26  
27  
28  
29  
30  
31  
32  
33  
34  
35  
36  
37  
38  
39  
40  
41  
42  
43  
44  
45  
46  
47  
48  
49  
50  
51  
52  
53  
54  
55  
56  
57  
58  
59  
60

For peer review only

1  
2  
3  
4  
5  
6  
7  
8  
9  
10  
11  
12  
13  
14  
15  
16  
17  
18  
19  
20  
21  
22  
23  
24  
25  
26  
27  
28  
29  
30  
31  
32  
33  
34  
35  
36  
37  
38  
39  
40  
41  
42  
43  
44  
45  
46  
47  
48  
49  
50  
51  
52  
53  
54  
55  
56  
57  
58  
59  
60

For peer review only



1  
2  
3  
4  
5  
6  
7  
8  
9  
10  
11  
12  
13  
14  
15  
16  
17  
18  
19  
20  
21  
22  
23  
24  
25  
26  
27  
28  
29  
30  
31  
32  
33  
34  
35  
36  
37  
38  
39  
40  
41  
42  
43  
44  
45  
46  
47  
48  
49  
50  
51  
52  
53  
54  
55  
56  
57  
58  
59  
60

For peer review only

1  
2  
3  
4  
5  
6  
7  
8  
9  
10  
11  
12  
13  
14  
15  
16  
17  
18  
19  
20  
21  
22  
23  
24  
25  
26  
27  
28  
29  
30  
31  
32  
33  
34  
35  
36  
37  
38  
39  
40  
41  
42  
43  
44  
45  
46  
47  
48  
49  
50  
51  
52  
53  
54  
55  
56  
57  
58  
59  
60

For peer review only

1  
2  
3  
4  
5  
6  
7  
8  
9  
10  
11  
12  
13  
14  
15  
16  
17  
18  
19  
20  
21  
22  
23  
24  
25  
26  
27  
28  
29  
30  
31  
32  
33  
34  
35  
36  
37  
38  
39  
40  
41  
42  
43  
44  
45  
46  
47  
48  
49  
50  
51  
52  
53  
54  
55  
56  
57  
58  
59  
60

For peer review only

1  
2  
3  
4  
5  
6  
7  
8  
9  
10  
11  
12  
13  
14  
15  
16  
17  
18  
19  
20  
21  
22  
23  
24  
25  
26  
27  
28  
29  
30  
31  
32  
33  
34  
35  
36  
37  
38  
39  
40  
41  
42  
43  
44  
45  
46  
47  
48  
49  
50  
51  
52  
53  
54  
55  
56  
57  
58  
59  
60

For peer review only

1  
2  
3  
4  
5  
6  
7  
8  
9  
10  
11  
12  
13  
14  
15  
16  
17  
18  
19  
20  
21  
22  
23  
24  
25  
26  
27  
28  
29  
30  
31  
32  
33  
34  
35  
36  
37  
38  
39  
40  
41  
42  
43  
44  
45  
46  
47  
48  
49  
50  
51  
52  
53  
54  
55  
56  
57  
58  
59  
60

For peer review only

1  
2  
3  
4  
5  
6  
7  
8  
9  
10  
11  
12  
13  
14  
15  
16  
17  
18  
19  
20  
21  
22  
23  
24  
25  
26  
27  
28  
29  
30  
31  
32  
33  
34  
35  
36  
37  
38  
39  
40  
41  
42  
43  
44  
45  
46  
47  
48  
49  
50  
51  
52  
53  
54  
55  
56  
57  
58  
59  
60

For peer review only

1  
2  
3  
4  
5  
6  
7  
8  
9  
10  
11  
12  
13  
14  
15  
16  
17  
18  
19  
20  
21  
22  
23  
24  
25  
26  
27  
28  
29  
30  
31  
32  
33  
34  
35  
36  
37  
38  
39  
40  
41  
42  
43  
44  
45  
46  
47  
48  
49  
50  
51  
52  
53  
54  
55  
56  
57  
58  
59  
60

For peer review only

1  
2  
3  
4  
5  
6  
7  
8  
9  
10  
11  
12  
13  
14  
15  
16  
17  
18  
19  
20  
21  
22  
23  
24  
25  
26  
27  
28  
29  
30  
31  
32  
33  
34  
35  
36  
37  
38  
39  
40  
41  
42  
43  
44  
45  
46  
47  
48  
49  
50  
51  
52  
53  
54  
55  
56  
57  
58  
59  
60

For peer review only



1  
2  
3  
4  
5  
6  
7  
8  
9  
10  
11  
12  
13  
14  
15  
16  
17  
18  
19  
20  
21  
22  
23  
24  
25  
26  
27  
28  
29  
30  
31  
32  
33  
34  
35  
36  
37  
38  
39  
40  
41  
42  
43  
44  
45  
46  
47  
48  
49  
50  
51  
52  
53  
54  
55  
56  
57  
58  
59  
60

For peer review only

1  
2  
3  
4  
5  
6  
7  
8  
9  
10  
11  
12  
13  
14  
15  
16  
17  
18  
19  
20  
21  
22  
23  
24  
25  
26  
27  
28  
29  
30  
31  
32  
33  
34  
35  
36  
37  
38  
39  
40  
41  
42  
43  
44  
45  
46  
47  
48  
49  
50  
51  
52  
53  
54  
55  
56  
57  
58  
59  
60

For peer review only

1  
2  
3  
4  
5  
6  
7  
8  
9  
10  
11  
12  
13  
14  
15  
16  
17  
18  
19  
20  
21  
22  
23  
24  
25  
26  
27  
28  
29  
30  
31  
32  
33  
34  
35  
36  
37  
38  
39  
40  
41  
42  
43  
44  
45  
46  
47  
48  
49  
50  
51  
52  
53  
54  
55  
56  
57  
58  
59  
60

For peer review only

1  
2  
3  
4  
5  
6  
7  
8  
9  
10  
11  
12  
13  
14  
15  
16  
17  
18  
19  
20  
21  
22  
23  
24  
25  
26  
27  
28  
29  
30  
31  
32  
33  
34  
35  
36  
37  
38  
39  
40  
41  
42  
43  
44  
45  
46  
47  
48  
49  
50  
51  
52  
53  
54  
55  
56  
57  
58  
59  
60

For peer review only

1  
2  
3  
4  
5  
6  
7  
8  
9  
10  
11  
12  
13  
14  
15  
16  
17  
18  
19  
20  
21  
22  
23  
24  
25  
26  
27  
28  
29  
30  
31  
32  
33  
34  
35  
36  
37  
38  
39  
40  
41  
42  
43  
44  
45  
46  
47  
48  
49  
50  
51  
52  
53  
54  
55  
56  
57  
58  
59  
60

elae

For peer review only

|    |             |
|----|-------------|
| 1  |             |
| 2  | ICD-10 code |
| 3  | A52.1       |
| 4  | A52.3       |
| 5  | A52.7       |
| 6  | A52.8       |
| 7  | A52.9       |
| 8  | C71.0       |
| 9  | C71.1       |
| 10 | C71.1       |
| 11 | C71.2       |
| 12 | C71.3       |
| 13 | C71.3       |
| 14 | C71.4       |
| 15 | C71.5       |
| 16 | C71.6       |
| 17 | C71.6       |
| 18 | C71.7       |
| 19 | C71.8       |
| 20 | C71.9       |
| 21 | C72.0       |
| 22 | C72.1       |
| 23 | C72.2       |
| 24 | C72.3       |
| 25 | C72.3       |
| 26 | C72.4       |
| 27 | C72.5       |
| 28 | C72.8       |
| 29 | C72.9       |
| 30 | C72.9       |
| 31 | D33.0       |
| 32 | D33.1       |
| 33 | D33.2       |
| 34 | D33.3       |
| 35 | D33.4       |
| 36 | D33.4       |
| 37 | D33.7       |
| 38 | D33.9       |
| 39 | E10.4       |
| 40 | E11.4       |
| 41 | E12.4       |
| 42 | E12.4       |
| 43 | E13.4       |
| 44 | E14.4       |
| 45 | F00.0       |
| 46 | F00.1       |
| 47 | F00.2       |
| 48 | F00.2       |
| 49 | F00.9       |
| 50 | F01.0       |
| 51 | F01.1       |
| 52 | F01.2       |
| 53 | F01.2       |
| 54 | F01.3       |
| 55 | F01.8       |
| 56 | F01.9       |
| 57 | F02.0       |
| 58 | F02.1       |
| 59 | F02.1       |
| 60 | F02.2       |
|    | F02.3       |

For peer review only

1  
2 F02.4  
3 F02.8  
4 F03  
5 F04  
6 F05.0  
7 F05.1  
8 F06.7  
9 F06.8  
10 F06.8  
11 F06.9  
12 G03.1  
13 G03.2  
14 G09  
15 G10  
16 G11.0  
17 G11.1  
18 G11.2  
19 G11.3  
20 G11.4  
21 G11.8  
22 G11.9  
23 G12.0  
24 G12.1  
25 G12.2  
26 G12.8  
27 G12.9  
28 G13.0  
29 G13.1  
30 G13.2  
31 G13.8  
32 G14  
33 G20  
34 G21.0  
35 G21.1  
36 G21.2  
37 G21.3  
38 G21.4  
39 G21.8  
40 G21.9  
41 G22  
42 G23.0  
43 G23.1  
44 G23.2  
45 G23.3  
46 G23.8  
47 G23.9  
48 G24.1  
49 G24.2  
50 G24.3  
51 G24.4  
52 G24.8

For peer review only

1  
2 G24.9  
3 G25.2  
4 G25.3  
5 G25.5  
6 G25.8  
7 G25.9  
8 G26  
9  
10 G30.0  
11 G30.1  
12 G30.8  
13 G30.9  
14 G31.0  
15 G31.1  
16 G31.2  
17 G31.8  
18 G31.9  
19 G32.0  
20 G32.8  
21 G35  
22 G36.0  
23 G37.0  
24 G37.1  
25 G37.2  
26 G37.5  
27 G37.8  
28 G37.9  
29 G40.0  
30 G40.1  
31 G40.2  
32 G40.3  
33 G40.4  
34 G40.5  
35 G40.6  
36 G40.7  
37 G40.8  
38 G40.9  
39 G41.0  
40 G41.1  
41 G41.2  
42 G41.8  
43 G41.9  
44 G43.0  
45 G43.1  
46 G43.2  
47 G43.3  
48 G43.8  
49 G43.9  
50 G44.0  
51 G44.1  
52 G44.2

For peer review only



1  
2 G44.3  
3 G44.8  
4 G45.0  
5 G45.1  
6 G45.2  
7 G46.0  
8 G46.1  
9 G46.2  
10 G46.3  
11 G46.4  
12 G46.5  
13 G46.6  
14 G46.7  
15 G46.8  
16 G47.4  
17 G50.0  
18 G50.1  
19 G50.8  
20 G50.9  
21 G51.2  
22 G51.3  
23 G51.4  
24 G51.8  
25 G51.9  
26 G52.0  
27 G52.1  
28 G52.2  
29 G52.3  
30 G52.7  
31 G52.8  
32 G52.9  
33 G53.1  
34 G53.2  
35 G53.3  
36 G53.8  
37 G54.5  
38 G60.0  
39 G60.1  
40 G60.2  
41 G60.3  
42 G60.8  
43 G60.9  
44 G61.0  
45 G61.1  
46 G61.8  
47 G61.9  
48 G62.0  
49 G62.1  
50 G62.2  
51 G62.8

For peer review only

1  
2 G62.9  
3 G63.0  
4 G63.1  
5 G63.2  
6 G63.3  
7 G63.4  
8 G63.5  
9 G63.6  
10 G63.8  
11 G64  
12 G70.0  
13 G70.1  
14 G70.2  
15 G70.8  
16 G70.9  
17 G71.0  
18 G71.1  
19 G71.2  
20 G71.3  
21 G71.8  
22 G71.9  
23 G72.0  
24 G72.1  
25 G72.2  
26 G72.3  
27 G72.4  
28 G72.8  
29 G73.0  
30 G73.1  
31 G73.2  
32 G73.3  
33 G73.6  
34 G73.7  
35 G80.0  
36 G80.1  
37 G80.2  
38 G80.3  
39 G80.4  
40 G80.8  
41 G80.9  
42 G81.0  
43 G81.1  
44 G81.9  
45 G82.0  
46 G82.1  
47 G82.2  
48 G82.3  
49 G82.4  
50 G82.5  
51 G83.0

For peer review only

1  
2 G83.1  
3 G83.2  
4 G83.3  
5 G83.5  
6 G83.6  
7 G83.8  
8 G83.9  
9 G83.9  
10 G90.0  
11 G90.1  
12 G90.4  
13 G90.8  
14 G90.9  
15 G90.9  
16 G91.0  
17 G91.1  
18 G91.2  
19 G91.3  
20 G91.3  
21 G91.8  
22 G91.9  
23 G92  
24 G93.0  
25 G93.1  
26 G93.2  
27 G93.4  
28 G93.4  
29 G93.5  
30 G93.8  
31 G93.9  
32 G94.1  
33 G94.2  
34 G94.3  
35 G94.8  
36 G94.8  
37 C95.0  
38 C95.1  
39 C95.8  
40 C95.9  
41 C96.1  
42 C96.8  
43 C96.9  
44 G97.2  
45 G98  
46 G99.0  
47 G99.1  
48 G99.2  
49 G99.8  
50 H46  
51 M14.6  
52 Q00.0  
53 Q00.1  
54 Q00.2  
55 Q01.0  
56 Q01.1  
57

For peer review only

1  
2 Q01.2  
3 Q01.8  
4 Q01.9  
5 Q02  
6 Q03.0  
7 Q03.1  
8 Q03.8  
9 Q03.9  
10 Q04.0  
11 Q04.1  
12 Q04.2  
13 Q04.3  
14 Q04.4  
15 Q04.5  
16 Q04.6  
17 Q04.8  
18 Q04.9  
19 Q05.0  
20 Q05.1  
21 Q05.2  
22 Q05.3  
23 Q05.4  
24 Q05.5  
25 Q05.6  
26 Q05.7  
27 Q05.8  
28 Q05.9  
29 Q06.0  
30 Q06.1  
31 Q06.2  
32 Q06.3  
33 Q06.4  
34 Q06.8  
35 Q06.9  
36 Q07.0  
37 Q07.8  
38 Q07.9  
39 Q85.0  
40 Q85.1  
41 Q85.8  
42 Q85.9  
43  
44  
45  
46  
47  
48  
49  
50  
51  
52  
53  
54  
55  
56  
57  
58  
59  
60

For peer review only

1  
2 Medcodeid  
3 1009531000006118  
4 1009571000006115  
5 1009611000006113  
6 1009631000006119  
7 1009651000006114  
8 1129781000000117  
9 1158111000000115  
10 1158321000000112  
11 1550051000000113  
12 1741561000006119  
13 3003361000006114  
14 3155151000006112  
15 7282231000006119  
16 7758091000006113  
17 8337561000006119  
18 13697811000006116  
19 296574014  
20 146051000006113  
21 201751000006110  
22 423361000006118  
23 423481000006119  
24 423511000006110  
25 426521000006114  
26 426531000006112  
27 426541000006119  
28 882791000006118  
29 2740341000000113  
30 13624181000006116  
31 127638013  
32 1234038018  
33 1705901000006118  
34 3750051000006112  
35 25776014  
36 63896011  
37 600811000006111  
38 1224941015  
39 3334501000006112  
40 378491010  
41 378497014  
42 1224879014  
43 88291000006114  
44 88301000006110  
45 88311000006113  
46 88321000006117  
47 636711000006113  
48 3334491000006116  
49 4831001000006119  
50 13621171000006117  
51 108541018

For peer review only

1  
2 829441000006116  
3 296995010  
4 696681000006115  
5 696701000006117  
6 3562061000006117  
7 3562141000006117  
8 3729481000006119  
9 10374011  
10 557191000000119  
11 378499012  
12 378500015  
13 239991000006111  
14 315350012  
15 1224880012  
16 88251000006115  
17 88261000006118  
18 88271000006113  
19 2835541000006116  
20 424971000006111  
21 1798621000000119  
22 7375381000006117  
23 7520191000006112  
24 7558801000006110  
25 7791221000006119  
26 53891000006113  
27 7769521000006118  
28  
29  
30  
31  
32  
33  
34  
35  
36  
37  
38  
39  
40  
41  
42  
43  
44  
45  
46  
47  
48  
49  
50  
51  
52  
53  
54  
55  
56  
57  
58  
59  
60

For peer review only

1  
2 Term  
3 Cause of learning disabilities: Down's syndrome  
4 Cause of learning disabilities: Fragile X syndrome  
5 Cause of learning disabilities: Microcephaly  
6 Cause of learning disabilities: Prader-Willi syndrome  
7 Cause of learning disabilities: Rett syndrome  
8 Severe learning disability  
9 Preferred place of care - learning disability unit  
10 Preferred place of death: learning disability unit  
11 Profound learning disability  
12 Excepted from learning disability quality indicators - patient unsuitable  
13 Profound learning disability  
14 Severe learning disability  
15 Nonverbal learning disorder  
16 X-linked epilepsy with learning disability and behaviour disorder syndrome  
17 Significant learning disability  
18 Significant learning disability  
19 [X]Severe mental retardation, other impairments of behaviour  
20 Severe mental retardation, IQ in range 20-34  
21 Profound mental retardation with IQ less than 20  
22 [X]Prfnd mental retardation without mention impairment behav  
23 [X]Profound ment retard sig impairmnt behav req attent/treat  
24 [X]Profound mental retardation, other impairments of behavr  
25 [X]Sev mental retard sig impairment behav req attent/treatmt  
26 [X]Sev mental retard with statement no or min impairm behav  
27 [X]Sev mental retardation without mention impairment behav  
28 Severe mental retardation  
29 Severe mental retardation without significant impairment of behaviour  
30 Infantile spasms, psychomotor retardation, progressive brain atrophy, basal ganglia disease syndror  
31 Angelman syndrome  
32 Angelman's syndrome  
33 Angelman syndrome  
34 Angelman syndrome  
35 Coffin-Lowry syndrome  
36 Cornelia de Lange syndrome  
37 Cri du chat syndrome  
38 Dubowitz syndrome  
39 Edwards syndrome  
40 Pseudotrismy 18  
41 Partial trisomy 18 in Edward's syndrome  
42 Trisomy 18 NOS  
43 Trisomy 18, meiotic nondisjunction  
44 Trisomy 18, mitotic nondisjunction  
45 Trisomy 18 - mitotic nondisjunction mosaicism  
46 Trisomy 18, translocation  
47 Edward's syndrome - trisomy 18  
48 Complete trisomy 18 syndrome  
49 Trisomy 18 - meiotic nondisjunction  
50 Distal trisomy 18q  
51 Hurler's syndrome

1 Hurler's syndrome  
2 Cerebral degeneration in mucopolysaccharidoses  
3 Mucopolysaccharidosis, type 1  
4 Mucopolysaccharidosis type III  
5 Mucopolysaccharidosis, MPS-I-H  
6 Mucopolysaccharidosis type I-H  
7 Mucopolysaccharidosis, MPS-I  
8 Laurence-Moon-Biedl syndrome  
9 Mowat-Wilson syndrome  
10 Patau's syndrome NOS  
11 Partial trisomy 13 in Patau's syndrome  
12 Patau syndrome  
13 Trisomy 13, meiotic nondisjunction  
14 Trisomy 13 NOS  
15 Trisomy 13, mitotic nondisjunction  
16 Trisomy 13 - mitotic nondisjunction mosaicism  
17 Trisomy 13, translocation  
18 Complete trisomy 13 syndrome  
19 Rett syndrome  
20 Chromosome 4q deletion syndrome  
21 Chromosome 3p deletion syndrome  
22 Chromosome 1p36 deletion syndrome  
23 Chromosome 2q37 deletion syndrome  
24 Chromosome Xp11.3 microdeletion syndrome  
25 Wolff - Hirschorn syndrome  
26 Wolf Hirschhorn syndrome  
27  
28  
29  
30  
31  
32  
33  
34  
35  
36  
37  
38  
39  
40  
41  
42  
43  
44  
45  
46  
47  
48  
49  
50  
51  
52  
53  
54  
55  
56  
57  
58  
59  
60



1  
2  
3  
4  
5  
6  
7  
8  
9  
10  
11  
12  
13  
14  
15  
16  
17  
18  
19  
20  
21  
22  
23  
24  
25  
26  
27  
28  
29  
30  
31  
32  
33  
34  
35  
36  
37  
38  
39  
40  
41  
42  
43  
44  
45  
46  
47  
48  
49  
50  
51  
52  
53  
54  
55  
56  
57  
58  
59  
60

me

For peer review only

| ICD-10 code | Term                                                                                             |
|-------------|--------------------------------------------------------------------------------------------------|
| F72.0       | Severe mental retardation with the statement of no, or minimal, impairment of behaviour          |
| F72.1       | Severe mental retardation significant impairment of behaviour requiring attention or treatment   |
| F72.8       | Severe mental retardation other impairments of behaviour                                         |
| F72.9       | Severe mental retardation without mention of impairment of behaviour                             |
| F73.0       | Profound mental retardation with the statement of no, or minimal, impairment of behaviour        |
| F73.1       | Profound mental retardation significant impairment of behaviour requiring attention or treatment |
| F73.8       | Profound mental retardation other impairments of behaviour                                       |
| F73.9       | Profound mental retardation without mention of impairment of behaviour                           |
| F78.1       | Other mental retardation significant impairment of behaviour requiring attention or treatment    |
| F80.3       | Acquired aphasia with epilepsy [Landau-Kleffner]                                                 |
| F84.2       | Rett syndrome                                                                                    |
| F84.3       | Other childhood disintegrative disorder                                                          |
| Q90.0       | Trisomy 21, meiotic nondisjunction                                                               |
| Q90.1       | Trisomy 21, mosaicism (mitotic nondisjunction)                                                   |
| Q90.2       | Trisomy 21, translocation                                                                        |
| Q90.9       | Down syndrome, unspecified                                                                       |
| Q91.0       | Trisomy 18, meiotic nondisjunction                                                               |
| Q91.1       | Trisomy 18, mosaicism (mitotic nondisjunction)                                                   |
| Q91.2       | Trisomy 18, translocation                                                                        |
| Q91.3       | Edwards syndrome, unspecified                                                                    |
| Q91.4       | Trisomy 13, meiotic nondisjunction                                                               |
| Q91.5       | Trisomy 13, mosaicism (mitotic nondisjunction)                                                   |
| Q91.6       | Trisomy 13, translocation                                                                        |
| Q91.7       | Patau syndrome, unspecified                                                                      |
| Q92.0       | Whole chromosome trisomy, meiotic nondisjunction                                                 |
| Q92.1       | Whole chromosome trisomy, mosaicism (mitotic nondisjunction)                                     |
| Q92.2       | Major partial trisomy                                                                            |
| Q92.3       | Minor partial trisomy                                                                            |
| Q92.7       | Triploidy and polyploidy                                                                         |
| Q92.8       | Other specified trisomies and partial trisomies of autosomes                                     |
| Q92.9       | Trisomy and partial trisomy of autosomes, unspecified                                            |
| Q93.3       | Deletion of short arm of chromosome 4                                                            |
| Q93.4       | Deletion of short arm of chromosome 5                                                            |
| Q93.5       | Other deletions of part of a chromosome                                                          |
| Q93.6       | Deletions seen only at prometaphase                                                              |
| Q93.7       | Deletions with other complex rearrangements                                                      |
| Q93.8       | Other deletions from the autosomes                                                               |
| Q93.9       | Deletion from autosomes, unspecified                                                             |
| Q95.2       | Balanced autosomal rearrangement in abnormal individual                                          |
| Q95.3       | Balanced sex/autosomal rearrangement in abnormal individual                                      |

1  
2  
3  
4  
5  
6  
7  
8  
9  
10  
11  
12  
13  
14  
15  
16  
17  
18  
19  
20  
21  
22  
23  
24  
25  
26  
27  
28  
29  
30  
31  
32  
33  
34  
35  
36  
37  
38  
39  
40  
41  
42  
43  
44  
45  
46  
47  
48  
49  
50  
51  
52  
53  
54  
55  
56  
57  
58  
59  
60

nt

For peer review only

| Medcodeid        | Term                                            |
|------------------|-------------------------------------------------|
| 378493013        | Down's syndrome NOS                             |
| 378494019        | Partial trisomy 21 in Down's syndrome           |
| 2159902018       | Suspected Downs syndrome                        |
| 628281000006114  | Down's syndrome                                 |
| 893481000006117  | Down's syndrome                                 |
| 1009531000006118 | Cause of learning disabilities: Down's syndrome |
| 1776611000006113 | Reason for referral: Downs Syndrome             |
| 1922491000006113 | Down syndrome body mass index centile           |
| 2376321000000116 | Down's syndrome height centile                  |
| 2376331000000119 | Down's syndrome weight centile                  |
| 3161041000006119 | Down syndrome                                   |
| 3161061000006115 | Downs syndrome                                  |
| 1224878018       | Trisomy 21 NOS                                  |
| 3528203016       | Trisomy 21                                      |
| 88351000006114   | Trisomy 21, meiotic nondisjunction              |
| 88361000006111   | Trisomy 21, mitotic nondisjunction              |
| 88371000006116   | Trisomy 21- mitotic nondisjunction mosaicism    |
| 88381000006118   | Trisomy 21, translocation                       |
| 117831000006117  | Suspect trisomy 21 foetus                       |
| 222121000000113  | Trisomy 21                                      |
| 3161031000006112 | Complete trisomy 21 syndrome                    |
| 4830941000006112 | Trisomy 21- meiotic nondisjunction              |
| 68472012         | Mongolism                                       |

1  
2  
3  
4  
5  
6  
7  
8  
9  
10  
11  
12  
13  
14  
15  
16  
17  
18  
19  
20  
21  
22  
23  
24  
25  
26  
27  
28  
29  
30  
31  
32  
33  
34  
35  
36  
37  
38  
39  
40  
41  
42  
43  
44  
45  
46  
47  
48  
49  
50  
51  
52  
53  
54  
55  
56  
57  
58  
59  
60

| ICD-10 code | Term                                           |
|-------------|------------------------------------------------|
| Q90.0       | Trisomy 21, meiotic nondisjunction             |
| Q90.1       | Trisomy 21, mosaicism (mitotic nondisjunction) |
| Q90.2       | Trisomy 21, translocation                      |
| Q90.9       | Down syndrome, unspecified                     |

For peer review only

1  
2 Medcodeid  
3 292553010  
4 459292011  
5 1780311019  
6 72711000006117  
7 84291000006117  
8 84371000006110  
9 84421000006115  
10 84451000006112  
11 2967831017  
12 84411000006111  
13 913931000006116  
14 12332281000006119  
15 8022441000006118  
16 6961081000006118  
17 6970621000006114  
18 12331231000006110  
19 12363721000006110  
20 4757991000006116  
21 6050081000006114  
22 6980001000006117  
23 12704951000006115  
24 84361000006115  
25 913541000006118  
26 84321000006114  
27 913781000006117  
28 84401000006113  
29 12331221000006112  
30 12332271000006117  
31 8027491000006113  
32 8024761000006118  
33 12085801000006113  
34 12345471000006114  
35 8022601000006118  
36 12370631000006117  
37 8025181000006114  
38 8040341000006111  
39 8037821000006110  
40 8022431000006111  
41 8022551000006115  
42 8032761000006111  
43 8050091000006115  
44 8022561000006118  
45 8006221000006115  
46 8037831000006113  
47 7969211000006115  
48 12102641000006114  
49 8022401000006115  
50 8027471000006112  
51 12363211000006112

1  
2 8032741000006112  
3 7287641000006112  
4 8024771000006113  
5 8019531000006110  
6 7696791000006110  
7  
8 3526507010  
9 6967091000006111  
10 8034431000006118  
11 8043591000006119  
12  
13 8027411000006115  
14 12370731000006114  
15 8026051000006110  
16 12370711000006115  
17 12370871000006115  
18 8026071000006117  
19 8034841000006114  
20 8120371000006113  
21 6971871000006117  
22 7098241000006117  
23 8027391000006115  
24 12085811000006111  
25 8232111000006119  
26 12370791000006113  
27 84731000006111  
28 913841000006116  
29 928501000006119  
30 616621000006115  
31 913941000006114  
32 84721000006113  
33 913521000006113  
34 913661000006118  
35 84771000006114  
36 7098211000006116  
37 12370361000006118  
38 12363201000006114  
39 7966541000006112  
40 8026061000006112  
41 12085821000006115  
42 12370371000006113  
43 8019521000006112  
44 8027511000006119  
45 12704941000006117  
46 292541011  
47 12332751000006115  
48 12705071000006113  
49 12334621000006111  
50 3537388019  
51 12370281000006118  
52 7708091000006118  
53 7287611000006113

For peer review only

1 913811000006115  
2 84341000006119  
3 457326014  
4 292540012  
5 7066041000006112  
6 12102631000006116  
7 8077141000006113  
8 12370721000006111  
9 928461000006119  
10 616611000006111  
11 8119341000006116  
12 12370891000006119  
13 8032751000006114  
14 12370801000006114  
15 8019541000006117  
16 8032731000006119  
17 6971901000006117  
18 12332761000006118  
19 12702371000006116  
20 84461000006114  
21 12345461000006119  
22 197984010  
23 3522045015  
24 12370621000006115  
25 7500221000006113  
26 7814941000006115  
27 4796311000006117  
28 12102661000006113  
29 8032781000006118  
30 8022541000006117  
31 8119331000006114  
32 12370611000006111  
33 7500251000006116  
34 938301000006114  
35 84441000006110  
36 84331000006112  
37 913481000006113  
38 5754581000006110  
39 12363671000006118  
40 84281000006115  
41 84301000006116  
42 84311000006118  
43 292548017  
44 12489581000006110  
45 7095251000006110  
46 429971019  
47 6969521000006113  
48 12370941000006118  
49 12370931000006111  
50 12370821000006116

For peer review only



1 8022481000006112  
2 8022491000006110  
3 8027451000006119  
4 8043331000006112  
5 7969221000006111  
6 8043321000006114  
7 8032771000006116  
8 84431000006117  
9 913901000006112  
10 12370271000006116  
11 12363661000006113  
12 8022461000006119  
13 12705001000006119  
14 12702361000006111  
15 84391000006111  
16 12370811000006112  
17 8043601000006110  
18 8034441000006111  
19 12370881000006117  
20 7075891000006110  
21 12370901000006115  
22 12085831000006117  
23 8030331000006117  
24 913451000006117  
25 84351000006117  
26 84381000006113  
27 913511000006117  
28 12334611000006115  
29 1665751000000119  
30 459161015  
31 459296014  
32 8025171000006111  
33 12370741000006116  
34 8032081000006115  
35 928521000006112  
36 299601000000114  
37 616681000006116  
38 616591000006117  
39 616601000006113  
40 616641000006110  
41 616651000006112  
42 616671000006119  
43 292482014  
44 616661000006114  
45 459309011  
46 493773010  
47 1223148019  
48 459162010  
49 771381000006115  
50 771401000006115

For peer review only

1 772141000006118  
2 913651000006115  
3 913831000006114  
4 913921000006119  
5 913981000006115  
6 6051171000006117  
7 280521000006117  
8 2949881000006116  
9 772181000006112  
10 913681000006111  
11 2949871000006119  
12 7587011000006110  
13 771331000006116  
14 771371000006118  
15 771411000006117  
16 772131000006111  
17 772151000006116  
18 787111000006112  
19 771421000006113  
20 73466011  
21 281181000006116  
22 2867421000006114  
23 772171000006114  
24 913711000006112  
25 913891000006113  
26 280541000006112  
27 281161000006114  
28 771341000006114  
29 772161000006119  
30 913531000006111  
31 280531000006119  
32 2867431000006112  
33 11927551000006115  
34 459293018  
35 771361000006113  
36 913771000006115  
37 913801000006118  
38 280571000006116  
39 72651000006114  
40 280511000006113  
41 6050071000006111  
42 6050041000006115  
43 77727018  
44 771351000006111  
45 771391000006117  
46 913621000006112  
47 429972014  
48 292551012  
49 429970018  
50 457325013

For peer review only

1  
2 459294012  
3 292550013  
4 84681000006118  
5 84711000006117  
6 84821000006118  
7  
8 913461000006115  
9 913851000006119  
10 928491000006110  
11 928511000006116  
12 928531000006110  
13 938311000006112  
14 6960431000006119  
15 6970631000006112  
16 6972441000006117  
17 6979991000006111  
18 6050061000006116  
19 6980431000006116  
20 84751000006116  
21 913671000006113  
22 913791000006119  
23 1667941000000112  
24 913491000006111  
25 8022411000006117  
26 8027421000006111  
27 7609891000006111  
28 12102651000006111  
29 12363221000006116  
30 12345481000006112  
31 6969531000006111  
32 7098221000006112  
33 84661000006111  
34 7966551000006114  
35 12702381000006118  
36 8014491000006111  
37 928471000006114  
38 84781000006112  
39 84801000006111  
40 2288011000000114  
41 6971881000006119  
42 7098231000006110  
43 913911000006110  
44 292543014  
45 6951081000006112  
46 6954991000006112  
47 6961901000006111  
48 84741000006118  
49 292538019  
50 12450761000006110  
51 8027461000006117  
52 7287621000006117

For peer review only

1  
2 6955501000006113  
3 6961091000006115  
4 84831000006115  
5 494564012  
6 459163017  
7  
8 8232101000006117  
9 8027481000006110  
10 6971891000006116  
11 11903141000006113  
12 5754621000006110  
13 6965561000006116  
14 913551000006116  
15 459295013  
16 1658861000000113  
17 8030341000006110  
18 7609851000006117  
19 8027401000006118  
20 8027501000006117  
21 84811000006114  
22 84701000006115  
23 6962751000006117  
24 6986151000006117  
25 5754611000006119  
26 913821000006111  
27 72721000006113  
28 84651000006114  
29 84671000006116  
30 84761000006119  
31 7287651000006114  
32 3253241000006117  
33 12336111000006119  
34 8440231000006115  
35 7480691000006118  
36 7480711000006115  
37 9312981000006113  
38 6965571000006111  
39 8014501000006115  
40 12336121000006110  
41 7609881000006113  
42 84691000006115  
43 7609841000006119  
44 8022471000006114  
45 8440241000006113  
46 11927561000006118  
47 7783451000006114  
48 7708051000006112  
49 459169018  
50 7480681000006116  
51 7708121000006119  
52 3209431000006116  
53  
54  
55  
56  
57  
58  
59  
60

For peer review only

1 7708071000006119  
2 84791000006110  
3 3253231000006110  
4 7480701000006118  
5 12344821000006114  
6 8084961000006111  
7 6961101000006114  
8 6951091000006110  
9 6971921000006110  
10 6971911000006119  
11 6960441000006112  
12 6972451000006115  
13 6980441000006114  
14 9312991000006111  
15 7066051000006114  
16 479511000000117  
17 7966931000006114  
18 7966941000006116  
19 12332111000006115  
20 12332101000006118  
21 881451000006113  
22 3209441000006114  
23 6979251000006110  
24 3209431000006116  
25 616481000006119  
26 616491000006116  
27 616501000006112  
28 616511000006110  
29 292483016  
30 616531000006116  
31 616541000006114  
32 12718861000006118  
33 616551000006111  
34 616561000006113  
35 616571000006118  
36 616581000006115  
37 5109461000006115  
38 479571000000110  
39 6959811000006110  
40 6977431000006113  
41 6969931000006116  
42 6982521000006119  
43 8084961000006111  
44 7966951000006119  
45 12702391000006115  
46 6959801000006112  
47 12704961000006118  
48 12762301000006111  
49 6983691000006114  
50 12704981000006111

For peer review only

1 6982511000006110  
2 6982151000006118  
3 12336881000006117  
4 12336871000006115  
5 12705011000006116  
6 6977971000006119  
7 12335681000006111  
8 12335671000006113  
9 6975211000006112  
10 6975221000006116  
11 12363691000006117  
12 7708071000006119  
13 12705081000006111  
14 12363681000006115  
15 850691000006118  
16 1488898011  
17 1667891000000113  
18 7783451000006114  
19 11927561000006118  
20 1223148019  
21 840951000006119  
22 914391000006116  
23 841351000006110  
24 1223147012  
25 6977421000006110  
26 12704991000006114  
27 6951281000006117  
28 12702401000006118  
29 6954121000006112  
30 12331061000006114  
31 12331051000006112  
32 12704971000006113  
33 6969921000006119  
34 12334131000006118  
35 12334141000006111  
36 493773010  
37 674961000006118  
38 12485441000006119  
39 281161000006114  
40 281181000006116  
41 73466011  
42 280571000006116  
43 281171000006119  
44 459309011  
45 281211000006117  
46 280511000006113  
47 280521000006117  
48 280531000006119  
49 280541000006112  
50 280551000006114

For peer review only

1  
2 280561000006111  
3 280581000006118  
4 280591000006115  
5 587111000006111  
6 587521000006111  
7 641581000006115  
8 457328010  
9 6985001000006110  
10 6985011000006113  
11 6959091000006114  
12 6981621000006113  
13 12363731000006113  
14 7708121000006119  
15 4796321000006113  
16 1988741000006117  
17 11931861000006112  
18 5110001000006118  
19 12336541000006114  
20 12336531000006116  
21 84471000006119  
22 197761014  
23 84481000006116  
24 292590011  
25 2288071000000116  
26 7281511000006118  
27 84491000006118  
28 459310018  
29 84501000006114  
30 914301000006111  
31 938321000006116  
32 84511000006112  
33 292583018  
34 299621000000117  
35 4758011000006112  
36 84521000006116  
37 459167016  
38 928581000006111  
39 928601000006118  
40 84531000006118  
41 914221000006113  
42 84541000006111  
43 292577016  
44 84551000006113  
45 914261000006119  
46 84561000006110  
47 914071000006115  
48 84571000006115  
49 459313016  
50 84581000006117  
51 914051000006113

For peer review only

1 84591000006119  
2 459308015  
3 928561000006118  
4 928541000006117  
5 84601000006110  
6 914241000006118  
7 84611000006113  
8 914031000006118  
9 84621000006117  
10 914151000006112  
11 84631000006119  
12 292579018  
13 84641000006112  
14 457329019  
15 1665721000000112  
16 84841000006113  
17 493774016  
18 84851000006110  
19 292589019  
20 2288061000000111  
21 84861000006112  
22 459311019  
23 84871000006117  
24 914311000006114  
25 938331000006118  
26 12489851000006117  
27 84881000006119  
28 292582011  
29 1667921000000117  
30 84891000006116  
31 459169018  
32 928591000006114  
33 928611000006115  
34 84901000006117  
35 914231000006111  
36 84911000006119  
37 292576013  
38 84921000006110  
39 914271000006114  
40 84931000006113  
41 914081000006117  
42 12702411000006115  
43 84941000006115  
44 459312014  
45 84951000006118  
46 914061000006110  
47 12702421000006111  
48 84961000006116  
49 459306016  
50 928571000006113

For peer review only



1  
2 928551000006115  
3 84971000006111  
4 914251000006116  
5 84981000006114  
6 914041000006111  
7 84991000006112  
8 914161000006114  
9 85001000006117  
10 292581016  
11 85011000006119  
12 457330012  
13 1658901000000118  
14 840971000006112  
15  
16  
17  
18  
19  
20  
21  
22  
23  
24  
25  
26  
27  
28  
29  
30  
31  
32  
33  
34  
35  
36  
37  
38  
39  
40  
41  
42  
43  
44  
45  
46  
47  
48  
49  
50  
51  
52  
53  
54  
55  
56  
57  
58  
59  
60

For peer review only

1  
2 Term

3 Type 1 diabetes mellitus maturity onset  
4 Type 1 diabetes mellitus with arthropathy  
5 Type 1 diabetes mellitus with persistent microalbuminuria  
6 Unstable type 1 diabetes mellitus  
7  
8 Type 1 diabetes mellitus - poor control  
9 Type 1 diabetes mellitus with nephropathy  
10 Type 1 diabetes mellitus with polyneuropathy  
11 Type 1 diabetes mellitus with ulcer  
12  
13 Pre-existing type 1 diabetes mellitus in pregnancy  
14 Type 1 diabetes mellitus with peripheral angiopathy  
15 Type 1 diabetes mellitus with peripheral angiopathy  
16 Retinopathy co-occurrent and due to type 1 diabetes mellitus  
17 Neuropathic arthropathy due to type 1 diabetes mellitus  
18 Gangrene associated with type 1 diabetes mellitus  
19  
20 Peripheral circulatory disorder associated with type 1 diabetes mellitus  
21 Exudative maculopathy co-occurrent and due to type 1 diabetes mellitus  
22 Polyneuropathy co-occurrent and due to type 1 diabetes mellitus  
23  
24 Type 1 diabetes mellitus with hyperosmolar coma  
25 Type 1 diabetes mellitus with hypoglycemic coma  
26 Kidney disorder associated with type 1 diabetes mellitus  
27 Diabetic retinopathy associated with type 1 diabetes mellitus  
28 Type 1 diabetes mellitus with multiple complications  
29 Type 1 diabetes mellitus with multiple complications  
30 Type 1 diabetes mellitus with diabetic cataract  
31 Type 1 diabetes mellitus with mononeuropathy  
32 Type 1 diabetes mellitus with ophthalmic complications  
33 Exudative maculopathy with type 1 diabetes mellitus  
34 Retinopathy with type 1 diabetes mellitus  
35  
36 Chronic kidney disease stage 5 due to type 1 diabetes mellitus  
37 Traction retinal detachment due to type 1 diabetes mellitus  
38 Macular oedema due to type 1 diabetes mellitus  
39  
40 Lumbosacral radiculoplexus neuropathy co-occurrent and due to type 1 diabetes mellitus  
41 Chronic ulcer of skin due to type 1 diabetes mellitus  
42 Peripheral neuropathy with type 1 diabetes mellitus  
43 Hypoglycemia due to type 1 diabetes mellitus  
44 Hypertension concurrent and due to end stage renal disease on dialysis due to type 1 diabetes melli  
45 Hypoglycaemic unawareness in type 1 diabetes mellitus  
46  
47 Nephrotic syndrome due to type 1 diabetes mellitus  
48 Severe malnutrition due to type 1 diabetes mellitus  
49  
50 Vitreous haemorrhage due to type 1 diabetes mellitus  
51 Foot ulcer due to type 1 diabetes mellitus  
52 Osteomyelitis due to type 1 diabetes mellitus  
53  
54 Microalbuminuria due to type 1 diabetes mellitus  
55 Hypoglycemic unawareness in type 1 diabetes mellitus  
56 Mixed hyperlipidaemia due to type 1 diabetes mellitus  
57 Cranial nerve palsy due to type 1 diabetes mellitus  
58 Hypertension in chronic kidney disease due to type 1 diabetes mellitus  
59  
60 Chronic kidney disease stage 4 due to type 1 diabetes mellitus  
Autonomic neuropathy co-occurrent and due to type 1 diabetes mellitus

1  
2 Retinal ischemia due to type 1 diabetes mellitus  
3 Type 1 diabetes mellitus well controlled  
4 Rubeosis iridis due to type 1 diabetes mellitus  
5 Proliferative retinopathy due to type 1 diabetes mellitus  
6 Diabetic autonomic neuropathy due to type 1 diabetes mellitus  
7 Disorder of nerve co-occurrent and due to type 1 diabetes mellitus  
8 Diabetic oculopathy associated with type 1 diabetes mellitus  
9 Retinal oedema due to type 1 diabetes mellitus  
10 Mild nonproliferative retinopathy due to type 1 diabetes mellitus  
11 Chronic kidney disease stage 2 due to type 1 diabetes mellitus  
12 Rubeosis iridis with type 1 diabetes mellitus  
13 Ankle ulcer due to type 1 diabetes mellitus  
14 Traction retinal detachment with type 1 diabetes mellitus  
15 Retinal oedema with type 1 diabetes mellitus  
16 Forefoot ulcer due to type 1 diabetes mellitus  
17 Ulcer of lower limb due to type 1 diabetes mellitus  
18 Dyslipidemia due to type 1 diabetes mellitus  
19 Hypoglycaemic coma in type 1 diabetes mellitus  
20 Dietary advice for type 1 diabetes  
21 Chronic kidney disease stage 1 due to type 1 diabetes mellitus  
22 Macular edema due to type 1 diabetes mellitus  
23 Referral to type 1 diabetes structured education programme  
24 Retinal ischaemia with type 1 diabetes mellitus  
25 Multiple complications of type 1 diabetes mellitus  
26 Renal disorder associated with type 1 diabetes mellitus  
27 Ketoacidosis in type 1 diabetes mellitus  
28 Type 1 diabetes mellitus without complication  
29 Peripheral angiopathy due to type 1 diabetes mellitus  
30 Mononeuropathy with type 1 diabetes mellitus  
31 Neurological disorder with type 1 diabetes mellitus  
32 Retinopathy with type 1 diabetes mellitus  
33 Disorder of eye with type 1 diabetes mellitus  
34 Dietary education for type 1 diabetes mellitus  
35 Erectile dysfunction with type 1 diabetes mellitus  
36 Autonomic neuropathy with type 1 diabetes mellitus  
37 Diabetic erectile dysfunction associated with type 1 diabetes mellitus  
38 Heel AND/OR midfoot ulcer due to type 1 diabetes mellitus  
39 Macular edema co-occurrent and due to type 1 diabetes mellitus  
40 Erectile dysfunction co-occurrent and due to type 1 diabetes mellitus  
41 Nonproliferative diabetic retinopathy due to type 1 diabetes mellitus  
42 End stage renal disease on dialysis due to type 1 diabetes mellitus  
43 Neurological disorder associated with type 1 diabetes mellitus  
44 Type 1 diabetes mellitus with gangrene  
45 Mononeuropathy with type 1 diabetes mellitus  
46 Gastroparesis due to type 1 diabetes mellitus  
47 Neurological disorder co-occurrent and due to type 1 diabetes mellitus  
48 Diabetic oculopathy due to type 1 diabetes mellitus  
49 Disorder of eye co-occurrent and due to type 1 diabetes mellitus  
50 Polyneuropathy due to type 1 diabetes mellitus  
51 Type 1 diabetes mellitus uncontrolled

1 Type 1 diabetes mellitus with polyneuropathy  
2 Type 1 diabetes mellitus with hypoglycaemic coma  
3 Type 1 diabetes mellitus without complication  
4 Type 1 diabetes mellitus with ulcer  
5 Small vessel disease due to type 1 diabetes mellitus  
6 Cranial nerve palsy with type 1 diabetes mellitus  
7 Proteinuria due to type 1 diabetes mellitus  
8 Traction retinal detachment co-occurrent and due to type 1 diabetes mellitus  
9 Persistent proteinuria associated with type 1 diabetes mellitus  
10 Disorder due to type 1 diabetes mellitus  
11 Hyperglycemia due to type 1 diabetes mellitus  
12 Retinal oedema co-occurrent and due to type 1 diabetes mellitus  
13 Diabetic vitreous haemorrhage due to type 1 diabetes mellitus  
14 Retinal ischemia with type 1 diabetes mellitus  
15 Blindness due to type 1 diabetes mellitus  
16 Retinal ischaemia due to type 1 diabetes mellitus  
17 Hypoglycemic coma in type 1 diabetes mellitus  
18 Mononeuropathy co-occurrent and due to type 1 diabetes mellitus  
19 Mononeuropathy associated with type 1 diabetes mellitus  
20 Type 1 diabetes mellitus without complication  
21 Lumbosacral radiculoplexus neuropathy with type 1 diabetes mellitus  
22 Type 1 diabetes mellitus  
23 Hyperosmolarity due to type 1 diabetes mellitus  
24 Blindness co-occurrent and due to type 1 diabetes mellitus  
25 Pre-existing type 1 diabetes mellitus in pregnancy  
26 Acidosis due to type 1 diabetes mellitus  
27 Pre-existing type 1 diabetes mellitus  
28 Cranial nerve palsy co-occurrent and due to type 1 diabetes mellitus  
29 Diabetic vitreous hemorrhage due to type 1 diabetes mellitus  
30 Diabetic dermopathy due to type 1 diabetes mellitus  
31 Hyperglycaemia due to type 1 diabetes mellitus  
32 Nonproliferative retinopathy co-occurrent and due to type 1 diabetes mellitus  
33 Pregnancy and type 1 diabetes mellitus  
34 Exudative maculopathy with type 1 diabetes mellitus  
35 Type 1 diabetes mellitus with retinopathy  
36 Type 1 diabetes mellitus with gangrene  
37 Type 1 diabetes mellitus with ophthalmic complications  
38 Brittle type 1 diabetes mellitus  
39 Gastroparesis co-occurrent and due to type 1 diabetes mellitus  
40 Type 1 diabetes mellitus  
41 Type 1 diabetes mellitus maturity onset  
42 Type 1 diabetes mellitus with arthropathy  
43 Type 1 diabetes mellitus - poor control  
44 Type 1 diabetes mellitus with gangrene  
45 Hyperosmolality due to uncontrolled type 1 diabetes mellitus  
46 Unstable type 1 diabetes mellitus  
47 Persistent microalbuminuria associated with type 1 diabetes mellitus  
48 Moderate nonproliferative retinopathy co-occurrent and due to type 1 diabetes mellitus  
49 Mild nonproliferative retinopathy co-occurrent and due to type 1 diabetes mellitus  
50 Retinal ischemia co-occurrent and due to type 1 diabetes mellitus  
51  
52  
53  
54  
55  
56  
57  
58  
59  
60

1  
2 Peripheral neuropathy due to type 1 diabetes mellitus  
3 Peripheral neuropathy co-occurrent and due to type 1 diabetes mellitus  
4 Chronic kidney disease stage 3 due to type 1 diabetes mellitus  
5 Hyperlipidemia due to type 1 diabetes mellitus  
6 Mixed hyperlipidemia due to type 1 diabetes mellitus  
7 Hyperlipidaemia due to type 1 diabetes mellitus  
8 Vitreous hemorrhage due to type 1 diabetes mellitus  
9 Type 1 diabetes mellitus with renal complications  
10 Type 1 diabetes mellitus with diabetic cataract  
11 Disorder of eye with type 1 diabetes mellitus  
12 Gastroparesis with type 1 diabetes mellitus  
13 Diabetic neuropathic arthropathy due to type 1 diabetes mellitus  
14 Exudative maculopathy associated with type 1 diabetes mellitus  
15 Diabetic cataract associated with type 1 diabetes mellitus  
16 Type 1 diabetes mellitus with neuropathic arthropathy  
17 Retinal ischaemia co-occurrent and due to type 1 diabetes mellitus  
18 Moderate nonproliferative retinopathy due to type 1 diabetes mellitus  
19 Retinal edema due to type 1 diabetes mellitus  
20 Retinal edema with type 1 diabetes mellitus  
21 Amyotrophy due to type 1 diabetes mellitus  
22 Retinal edema co-occurrent and due to type 1 diabetes mellitus  
23 Macular oedema co-occurrent and due to type 1 diabetes mellitus  
24 Chronic kidney disease due to type 1 diabetes mellitus  
25 Type 1 diabetes mellitus with renal complications  
26 Type 1 diabetes mellitus with mononeuropathy  
27 Type 1 diabetes mellitus with neurological complications  
28 Type 1 diabetes mellitus with neurological complications  
29 Neurological disorder with type 1 diabetes mellitus  
30 Type 1 diabetic dietary review  
31 Type 1 diabetes mellitus with hypoglycaemic coma  
32 Type 1 diabetes mellitus with neuropathic arthropathy  
33 Hypoglycaemia due to type 1 diabetes mellitus  
34 Rubeosis iridis co-occurrent and due to type 1 diabetes mellitus  
35 Sensory neuropathy due to type 1 diabetes mellitus  
36 Ketoacidotic coma in type 1 diabetes mellitus  
37 Gastroparesis with type 1 diabetes mellitus  
38 Diabetes mellitus, juvenile, + other specified manifestation  
39 Diabetes mellitus, juvenile +peripheral circulatory disorder  
40 Diabetes mellitus, juvenile type, + ophthalmic manifestation  
41 Diabetes mellitus, juvenile type, with ketoacidosis  
42 Diabetes mellitus, juvenile type, with ketoacidotic coma  
43 Diabetes mellitus, juvenile, + neurological manifestation  
44 Diabetes mellitus, juvenile type, with hyperosmolar coma  
45 Diabetes mellitus, juvenile type, with renal manifestation  
46 Non-insulin dependent diabetes mellitus with arthropathy  
47 NIDDM - Non-insulin dependent diabetes mellitus  
48 Insulin treated non-insulin dependent diabetes mellitus  
49 Insulin dependent diabetes mellitus with hypoglycaemic coma  
50 Insulin dependent diabetes mellitus with multiple complicatn  
51 Insulin dependent diabetes mellitus with polyneuropathy

1 Insulin dependent diab mell with peripheral angiopathy  
2 Insulin dependent diabetes mellitus with retinopathy  
3 Insulin dependent diabetes mellitus with nephropathy  
4 Insulin dependent diab mell with peripheral angiopathy  
5 Insulin dependent diab mell with neuropathic arthropathy  
6 Insulin dependent diabetes mellitus with arthropathy  
7 Non-insulin dependent diabetes mellitus with mononeuropathy  
8 Insulin dependent diabetes mellitus type 1B  
9 Insulin dependent diabetes mellitus - poor control  
10 Insulin dependent diabetes mellitus - poor control  
11 Insulin dependent diabetes mellitus type 1B  
12 Maternal history of non-insulin dependent diabetes mellitus  
13 Insulin dependent diabetes mellitus with arthropathy  
14 Insulin dependent diabetes mellitus with mononeuropathy  
15 Insulin dependent diabetes mellitus with retinopathy  
16 Insulin dependent diab mell with neuropathic arthropathy  
17 Insulin dependent diabetes maturity onset  
18 IDDM-Insulin dependent diabetes mellitus  
19 Insulin dependent diabetes mellitus with ulcer  
20 Non-insulin dependent diabetes mellitus  
21 Non-insulin dependent diabetes mellitus with neuropathic arthropathy  
22 Insulin dependent diabetes mellitus type 1A  
23 Insulin dependent diabetes mellitus  
24 Insulin dependent diabetes maturity onset  
25 Insulin dependent diabetes mellitus with diabetic cataract  
26 Non-insulin dependent diabetes mellitus with polyneuropathy  
27 Non-insulin depend diabetes mellitus with diabetic cataract  
28 Insulin dependent diabetes mellitus with diabetic cataract  
29 Insulin dependent diabetes mellitus  
30 Insulin dependent diabetes mellitus with multiple complicat  
31 Non-insulin dependent diabetes mellitus with nephropathy  
32 Insulin dependent diabetes mellitus type 1A  
33 Insulin dependent diabetes mellitus with ulcer  
34 Insulin dependent diabetes mellitus with arthropathy  
35 Insulin dependent diabetes mellitus with hypoglycaemic coma  
36 Insulin dependent diabetes mellitus with mononeuropathy  
37 Insulin dependent diabetes mellitus with polyneuropathy  
38 Non-insulin dependent diabetes mellitus  
39 Unstable insulin dependent diabetes mellitus  
40 Non-insulin dependent diabetes mellitus with hypoglyca coma  
41 Insulin dependent diabetes mellitus with hypoglycemic coma  
42 Insulin dependent diabetes mellitus with hypoglycaemic coma  
43 Insulin dependent diabetes mellitus  
44 Insulin dependent diabetes mellitus with gangrene  
45 Insulin dependent diabetes mellitus with nephropathy  
46 Insulin dependent diabetes mellitus with gangrene  
47 Unstable insulin dependent diabetes mellitus  
48 Type I diabetes mellitus maturity onset  
49 Unstable type I diabetes mellitus  
50 Type I diabetes mellitus without complication

1  
2 Type I diabetes mellitus with arthropathy  
3 Type I diabetes mellitus - poor control  
4 Type I diabetes mellitus with arthropathy  
5 Type I diabetes mellitus with hypoglycaemic coma  
6 Type I diabetes mellitus with ulcer  
7  
8 Type I diabetes mellitus with renal complications  
9 Type I diabetes mellitus with nephropathy  
10 Type I diabetes mellitus with persistent microalbuminuria  
11 Type I diabetes mellitus with ketoacidosis  
12 Type I diabetes mellitus with ketoacidotic coma  
13 Type I diabetes mellitus with exudative maculopathy  
14 Diabetic retinopathy associated with type I diabetes mellitus  
15 Peripheral circulatory disorder associated with type I diabetes mellitus  
16 Neurological disorder associated with type I diabetes mellitus  
17 Renal disorder associated with type I diabetes mellitus  
18 Type I diabetes mellitus with hypoglycemic coma  
19 Diabetic cataract associated with type I diabetes mellitus  
20 Type I diabetes mellitus with neurological complications  
21 Type I diabetes mellitus with retinopathy  
22 Type I diabetes mellitus with mononeuropathy  
23 Type I diabetes mellitus with gastroparesis  
24 Type I diabetes mellitus with ophthalmic complications  
25 Hypertension in chronic kidney disease due to type I diabetes mellitus  
26 Chronic kidney disease stage 2 due to type I diabetes mellitus  
27 Retinopathy due to brittle type I diabetes mellitus  
28 Cranial nerve palsy with type I diabetes mellitus  
29 Autonomic neuropathy with type I diabetes mellitus  
30 Lumbosacral radiculoplexus neuropathy with type I diabetes mellitus  
31 Persistent microalbuminuria associated with type I diabetes mellitus  
32 Dietary education for type I diabetes mellitus  
33 Type I diabetes mellitus poorly controlled  
34 Erectile dysfunction associated with type I diabetes mellitus  
35 Diabetic oculopathy due to type I diabetes mellitus  
36 Peripheral vascular disease due to type I diabetes  
37 Type I diabetes mellitus with persistent proteinuria  
38 Type I diabetes mellitus with peripheral angiopathy  
39 Type I diabetes mellitus with renal complications  
40 Type I diabetes mellitus in remission  
41 Hypoglycemic coma in type I diabetes mellitus  
42 Dietary advice for type I diabetes  
43 Type I diabetes mellitus with diabetic cataract  
44 Type I diabetes mellitus with gangrene  
45 Ketoacidosis in type I diabetes mellitus  
46 Exudative maculopathy associated with type I diabetes mellitus  
47 Disorder associated with type I diabetes mellitus  
48 Type I diabetes mellitus with nephropathy  
49 Type I diabetes mellitus with ulcer  
50 Type I diabetes mellitus with gangrene  
51 Chronic kidney disease stage 3 due to type I diabetes mellitus  
52 Type I diabetes mellitus uncontrolled



1 Persistent proteinuria associated with type I diabetes mellitus  
2 Gangrene associated with type I diabetes mellitus  
3 Type I diabetes mellitus without complication  
4 Type I diabetes mellitus  
5 Type I diabetes mellitus with hypoglycaemic coma  
6 Referral to type I diabetes structured education programme  
7 Chronic kidney disease stage 4 due to type I diabetes mellitus  
8 Hypoglycaemic coma in type I diabetes mellitus  
9 Diabetic oculopathy associated with type I diabetes mellitus  
10 Labile type I diabetes mellitus  
11 Ketoacidotic coma in type I diabetes mellitus  
12 Type I diabetes mellitus with multiple complications  
13 Type I diabetes mellitus with neuropathic arthropathy  
14 Type I diabetic dietary review  
15 Chronic kidney disease due to type I diabetes mellitus  
16 Neuropathy due to brittle type I diabetes mellitus  
17 Chronic kidney disease stage 1 due to type I diabetes mellitus  
18 Chronic kidney disease stage 5 due to type I diabetes mellitus  
19 Type I diabetes mellitus with retinopathy  
20 Type I diabetes mellitus with gangrene  
21 Mononeuropathy associated with type I diabetes mellitus  
22 Multiple complications of type I diabetes mellitus  
23 Brittle type I diabetes mellitus  
24 Type I diabetes mellitus with polyneuropathy  
25 Unstable type I diabetes mellitus  
26 Type I diabetes mellitus  
27 Type I diabetes mellitus maturity onset  
28 Type I diabetes mellitus with neuropathic arthropathy  
29 Type I diabetes mellitus well controlled  
30 Diabetes mellitus type 1  
31 Cataract due to diabetes mellitus type 1  
32 Eating disorder co-occurrent with diabetes mellitus type 1  
33 H/O diabetes mellitus type 1  
34 History of diabetes mellitus type 1  
35 Skin ulcer of toe due to diabetes mellitus type 1  
36 Diabetes mellitus type 1 with ketoacidotic coma  
37 Diabetes mellitus type 1 without retinopathy  
38 Cataract co-occurrent and due to diabetes mellitus type 1  
39 Retinopathy due to unstable diabetes mellitus type 1  
40 Cataract due to diabetes mellitus type 1  
41 Neuropathy due to unstable diabetes mellitus type 1  
42 Diabetes mellitus type 1 with diabetic Charcot's arthropathy  
43 ED-DMT1 - Eating disorder-diabetes mellitus type 1  
44 Hypoglycemic coma co-occurrent and due to diabetes mellitus type II  
45 Hypoglycaemic coma co-occurrent and due to diabetes mellitus type II  
46 Gastroparesis due to diabetes mellitus type I  
47 Hypoglycaemic coma co-occurrent and due to diabetes mellitus type II  
48 History of diabetes mellitus type II  
49 Polyneuropathy due to diabetes mellitus type II  
50 Diabetes mellitus type II  
51  
52  
53  
54  
55  
56  
57  
58  
59  
60



1  
2     Gastroparesis due to diabetes mellitus type II  
3     Polyneuropathy due to diabetes mellitus type I  
4     Diabetes mellitus type I  
5     History of diabetes mellitus type I  
6     Diabetes type II with amyotrophy  
7     Diabetes type II review  
8     Diabetes type 1 with gangrene  
9     Diabetes type 1 with ketoacidosis  
10    Diabetes type 1 with hypoglycaemic coma  
11    Diabetes type 1 with hypoglycemic coma  
12    Diabetes type 1 with retinopathy  
13    Diabetes type 1 with neurological disorder  
14    Diabetes type 1 with cataract  
15    Diabetes type 1 with diabetic ulcer of toe, skin breakdown  
16    Diabetes type 1 with small vessel disease  
17    Diabetes type 1 review  
18    Angina associated with type 2 diabetes mellitus  
19    Angina associated with type II diabetes mellitus  
20    Cataract co-occurrent and due to diabetes mellitus type 2  
21    Cataract due to diabetes mellitus type 2  
22    Diabetes mellitus -adult onset  
23    Diabetes mellitus type 2  
24    Diabetes mellitus type 2 with ketoacidotic coma  
25    Diabetes mellitus type II  
26    Diabetes mellitus, adult onset, + neurological manifestation  
27    Diabetes mellitus, adult onset, + ophthalmic manifestation  
28    Diabetes mellitus, adult onset, + unspecified complication  
29    Diabetes mellitus, adult onset, no mention of complication  
30    Diabetes mellitus, adult onset, with hyperosmolar coma  
31    Diabetes mellitus, adult onset, with ketoacidosis  
32    Diabetes mellitus, adult onset, with ketoacidotic coma  
33    Diabetes mellitus, adult onset, with no mention of complication  
34    Diabetes mellitus, adult onset, with renal manifestation  
35    Diabetes mellitus, adult with gangrene  
36    Diabetes mellitus, adult, + other specified manifestation  
37    Diabetes mellitus, adult, + peripheral circulatory disorder  
38    Diabetes type 2 on insulin  
39    Diabetes type 2 review  
40    Diabetes type 2 with cataract  
41    Diabetes type 2 with ketoacidosis  
42    Diabetes type 2 with neurological disorder  
43    Diabetes type 2 with retinopathy  
44    Diabetes type II review  
45    Diabetic angina pectoris associated with type 2 diabetes mellitus  
46    Diabetic cataract associated with type 2 diabetes mellitus  
47    Diabetic cataract associated with type II diabetes mellitus  
48    Diabetic oculopathy associated with type 2 diabetes mellitus  
49    Diabetic oculopathy associated with type 2 diabetes mellitus  
50    Diabetic oculopathy associated with type II diabetes mellitus  
51    Diabetic retinopathy associated with type 2 diabetes mellitus

1 Diabetic retinopathy associated with type II diabetes mellitus  
2 Disorder due to type II diabetes mellitus  
3 Disorder of eye co-occurrent and due to type 2 diabetes mellitus  
4 Disorder of eye with type 2 diabetes mellitus  
5 Exudative maculopathy associated with type 2 diabetes mellitus  
6 Exudative maculopathy associated with type II diabetes mellitus  
7 Exudative maculopathy co-occurrent and due to type 2 diabetes mellitus  
8 Exudative maculopathy with type 2 diabetes mellitus  
9 Gangrene associated with type 2 diabetes mellitus  
10 Gangrene associated with type II diabetes mellitus  
11 Gastroparesis co-occurrent and due to type 2 diabetes mellitus  
12 Gastroparesis due to diabetes mellitus type II  
13 Gastroparesis due to type 2 diabetes mellitus  
14 Gastroparesis with type 2 diabetes mellitus  
15 Hyperosmolar non-ketotic state in type 2 diabetes mellitus  
16 Hyperosmolar non-ketotic state in type 2 diabetes mellitus  
17 Hyperosmolar non-ketotic state in type II diabetes mellitus  
18 Hypoglycaemic coma co-occurrent and due to diabetes mellitus type II  
19 Hypoglycemic coma co-occurrent and due to diabetes mellitus type II  
20 Insulin treated non-insulin dependent diabetes mellitus  
21 Insulin treated Type 2 diabetes mellitus  
22 Insulin treated Type 2 diabetes mellitus  
23 Insulin treated Type II diabetes mellitus  
24 Insulin treated Type II diabetes mellitus  
25 Ketoacidosis in type II diabetes mellitus  
26 Ketoacidotic coma in type 2 diabetes mellitus  
27 Kidney disorder associated with type 2 diabetes mellitus  
28 Mononeuropathy associated with type 2 diabetes mellitus  
29 Mononeuropathy associated with type II diabetes mellitus  
30 Mononeuropathy co-occurrent and due to type 2 diabetes mellitus  
31 Mononeuropathy with type 2 diabetes mellitus  
32 Neurologic disorder associated with type 2 diabetes mellitus  
33 Neurologic disorder associated with type II diabetes mellitus  
34 Neurological disorder co-occurrent and due to type 2 diabetes mellitus  
35 Neurological disorder with diabetes type 2  
36 NIDDM - Non-insulin dependent diabetes mellitus  
37 NIDDM with peripheral circulatory disorder  
38 NIDDM with peripheral circulatory disorder  
39 Non-insulin depend diabetes mellitus with diabetic cataract  
40 Non-insulin dependent d m with neuropathic arthropathy  
41 Non-insulin dependent diabetes mellitus  
42 Non-insulin dependent diabetes mellitus  
43 Non-insulin dependent diabetes mellitus - poor control  
44 Non-insulin dependent diabetes mellitus with arthropathy  
45 Non-insulin dependent diabetes mellitus with gangrene  
46 Non-insulin dependent diabetes mellitus with hypoglyca coma  
47 Non-insulin dependent diabetes mellitus with mononeuropathy  
48 Non-insulin dependent diabetes mellitus with nephropathy  
49 Non-insulin dependent diabetes mellitus with polyneuropathy  
50 Non-insulin dependent diabetes mellitus with ulcer

1 Non-insulin-dependent d m with peripheral angiopath  
2 Non-insulin-dependent diabetes mellitus with multiple comps  
3 Non-insulin-dependent diabetes mellitus with neuro comps  
4 Non-insulin-dependent diabetes mellitus with ophthalm comps  
5 Non-insulin-dependent diabetes mellitus with renal comps  
6 Non-insulin-dependent diabetes mellitus with retinopathy  
7 Non-insulin-dependent diabetes mellitus without complication  
8 Peripheral circulatory disorder associated with type 2 diabetes mellitus  
9 Peripheral circulatory disorder associated with type II diabetes mellitus  
10 Persistent microalbuminuria associated with type II diabetes mellitus  
11 Persistent proteinuria associated with type II diabetes mellitus  
12 Polyneuropathy co-occurrent and due to type 2 diabetes mellitus  
13 Polyneuropathy due to diabetes mellitus type II  
14 Pre-existing type 2 diabetes mellitus  
15 Pre-existing type 2 diabetes mellitus in pregnancy  
16 Pre-existing type 2 diabetes mellitus in pregnancy  
17 Pregnancy and type 2 diabetes mellitus  
18 Retinopathy co-occurrent and due to type 2 diabetes mellitus  
19 Retinopathy with type 2 diabetes mellitus  
20 Type 2 diabetes mellitus  
21 Type 2 diabetes mellitus  
22 Type 2 diabetes mellitus - poor control  
23 Type 2 diabetes mellitus - poor control  
24 Type 2 diabetes mellitus in remission  
25 Type 2 diabetes mellitus uncontrolled  
26 Type 2 diabetes mellitus with arthropathy  
27 Type 2 diabetes mellitus with arthropathy  
28 Type 2 diabetes mellitus with diabetic cataract  
29 Type 2 diabetes mellitus with diabetic cataract  
30 Type 2 diabetes mellitus with exudative maculopathy  
31 Type 2 diabetes mellitus with gangrene  
32 Type 2 diabetes mellitus with gangrene  
33 Type 2 diabetes mellitus with gastroparesis  
34 Type 2 diabetes mellitus with hyperosmolar coma  
35 Type 2 diabetes mellitus with hypoglycaemic coma  
36 Type 2 diabetes mellitus with hypoglycaemic coma  
37 Type 2 diabetes mellitus with ketoacidosis  
38 Type 2 diabetes mellitus with ketoacidotic coma  
39 Type 2 diabetes mellitus with mononeuropathy  
40 Type 2 diabetes mellitus with mononeuropathy  
41 Type 2 diabetes mellitus with multiple complications  
42 Type 2 diabetes mellitus with multiple complications  
43 Type 2 diabetes mellitus with nephropathy  
44 Type 2 diabetes mellitus with nephropathy  
45 Type 2 diabetes mellitus with neurological complications  
46 Type 2 diabetes mellitus with neurological complications  
47 Type 2 diabetes mellitus with neuropathic arthropathy  
48 Type 2 diabetes mellitus with neuropathic arthropathy  
49 Type 2 diabetes mellitus with ophthalmic complications  
50 Type 2 diabetes mellitus with ophthalmic complications

1 Type 2 diabetes mellitus with peripheral angiopathy  
2 Type 2 diabetes mellitus with peripheral angiopathy  
3 Type 2 diabetes mellitus with peripheral angiopathy  
4 Type 2 diabetes mellitus with persistent microalbuminuria  
5 Type 2 diabetes mellitus with persistent proteinuria  
6 Type 2 diabetes mellitus with polyneuropathy  
7 Type 2 diabetes mellitus with polyneuropathy  
8 Type 2 diabetes mellitus with renal complications  
9 Type 2 diabetes mellitus with renal complications  
10 Type 2 diabetes mellitus with renal complications  
11 Type 2 diabetes mellitus with retinopathy  
12 Type 2 diabetes mellitus with retinopathy  
13 Type 2 diabetes mellitus with ulcer  
14 Type 2 diabetes mellitus with ulcer  
15 Type 2 diabetes mellitus without complication  
16 Type 2 diabetes mellitus without complication  
17 Type 2 diabetic dietary review  
18 Type II diabetes mellitus  
19 Type II diabetes mellitus  
20 Type II diabetes mellitus - poor control  
21 Type II diabetes mellitus - poor control  
22 Type II diabetes mellitus in remission  
23 Type II diabetes mellitus with arthropathy  
24 Type II diabetes mellitus with arthropathy  
25 Type II diabetes mellitus with diabetic cataract  
26 Type II diabetes mellitus with diabetic cataract  
27 Type II diabetes mellitus with exudative maculopathy  
28 Type II diabetes mellitus with exudative maculopathy  
29 Type II diabetes mellitus with gangrene  
30 Type II diabetes mellitus with gangrene  
31 Type II diabetes mellitus with gastroparesis  
32 Type II diabetes mellitus with hypoglycaemic coma  
33 Type II diabetes mellitus with hypoglycaemic coma  
34 Type II diabetes mellitus with ketoacidosis  
35 Type II diabetes mellitus with ketoacidotic coma  
36 Type II diabetes mellitus with mononeuropathy  
37 Type II diabetes mellitus with mononeuropathy  
38 Type II diabetes mellitus with multiple complications  
39 Type II diabetes mellitus with multiple complications  
40 Type II diabetes mellitus with nephropathy  
41 Type II diabetes mellitus with nephropathy  
42 Type II diabetes mellitus with neurological complications  
43 Type II diabetes mellitus with neurological complications  
44 Type II diabetes mellitus with neurological complications  
45 Type II diabetes mellitus with neuropathic arthropathy  
46 Type II diabetes mellitus with neuropathic arthropathy  
47 Type II diabetes mellitus with ophthalmic complications  
48 Type II diabetes mellitus with ophthalmic complications  
49 Type II diabetes mellitus with ophthalmic complications  
50 Type II diabetes mellitus with peripheral angiopathy  
51 Type II diabetes mellitus with peripheral angiopathy  
52 Type II diabetes mellitus with persistent microalbuminuria

- 1
- 2 Type II diabetes mellitus with persistent proteinuria
- 3 Type II diabetes mellitus with polyneuropathy
- 4 Type II diabetes mellitus with polyneuropathy
- 5 Type II diabetes mellitus with renal complications
- 6 Type II diabetes mellitus with renal complications
- 7 Type II diabetes mellitus with retinopathy
- 8 Type II diabetes mellitus with retinopathy
- 9 Type II diabetes mellitus with retinopathy
- 10 Type II diabetes mellitus with ulcer
- 11 Type II diabetes mellitus with ulcer
- 12 Type II diabetes mellitus without complication
- 13 Type II diabetes mellitus without complication
- 14 Type II diabetes mellitus without complication
- 15 Type II diabetic dietary review
- 16 Diabetes mellitus autosomal dominant type 2
- 17
- 18
- 19
- 20
- 21
- 22
- 23
- 24
- 25
- 26
- 27
- 28
- 29
- 30
- 31
- 32
- 33
- 34
- 35
- 36
- 37
- 38
- 39
- 40
- 41
- 42
- 43
- 44
- 45
- 46
- 47
- 48
- 49
- 50
- 51
- 52
- 53
- 54
- 55
- 56
- 57
- 58
- 59
- 60

For peer review only

1  
2  
3  
4  
5  
6  
7  
8  
9  
10  
11  
12  
13  
14  
15  
16  
17  
18  
19  
20  
21  
22  
23  
24  
25  
26  
27  
28  
29  
30  
31  
32  
33  
34  
35  
36  
37  
38  
39  
40  
41  
42  
43  
44  
45  
46  
47  
48  
49  
50  
51  
52  
53  
54  
55  
56  
57  
58  
59  
60

For peer review only

itus

|    | ICD-10 code | Category                                                                                           |
|----|-------------|----------------------------------------------------------------------------------------------------|
| 1  |             |                                                                                                    |
| 2  |             |                                                                                                    |
| 3  | E10.1       | Type 1 diabetes mellitus with coma                                                                 |
| 4  | E10.2       | Type 1 diabetes mellitus with ketoacidosis                                                         |
| 5  | E10.3       | Type 1 diabetes mellitus with renal complications                                                  |
| 6  | E10.4       | Type 1 diabetes mellitus with ophthalmic complications                                             |
| 7  | E10.5       | Type 1 diabetes mellitus with neurological complications                                           |
| 8  | E10.6       | Type 1 diabetes mellitus with peripheral circulatory complications                                 |
| 9  | E10.7       | Type 1 diabetes mellitus with other specific complications                                         |
| 10 | E10.8       | Type 1 diabetes mellitus with multiple complications                                               |
| 11 | E10.9       | Type 1 diabetes mellitus without complications                                                     |
| 12 |             |                                                                                                    |
| 13 | E11.1       | Type 2 diabetes mellitus with coma                                                                 |
| 14 | E11.2       | Type 2 diabetes mellitus with ketoacidosis                                                         |
| 15 | E11.3       | Type 2 diabetes mellitus with renal complications                                                  |
| 16 | E11.4       | Type 2 diabetes mellitus with ophthalmic complications                                             |
| 17 | E11.5       | Type 2 diabetes mellitus with neurological complications                                           |
| 18 | E11.6       | Type 2 diabetes mellitus with peripheral circulatory complications                                 |
| 19 | E11.7       | Type 2 diabetes mellitus with other specific complications                                         |
| 20 | E11.8       | Type 2 diabetes mellitus with multiple complications                                               |
| 21 | E11.9       | Type 2 diabetes mellitus without complications                                                     |
| 22 |             |                                                                                                    |
| 23 | E12.1       | Malnutrition-related diabetes mellitus diabetes mellitus with coma                                 |
| 24 | E12.2       | Malnutrition-related diabetes mellitus diabetes mellitus with ketoacidosis                         |
| 25 | E12.3       | Malnutrition-related diabetes mellitus diabetes mellitus with renal complications                  |
| 26 | E12.4       | Malnutrition-related diabetes mellitus diabetes mellitus with ophthalmic complications             |
| 27 | E12.5       | Malnutrition-related diabetes mellitus diabetes mellitus with neurological complications           |
| 28 | E12.6       | Malnutrition-related diabetes mellitus diabetes mellitus with peripheral circulatory complications |
| 29 | E12.7       | Malnutrition-related diabetes mellitus diabetes mellitus with other specific complications         |
| 30 | E12.8       | Malnutrition-related diabetes mellitus diabetes mellitus with multiple complications               |
| 31 | E12.9       | Malnutrition-related diabetes mellitus diabetes mellitus without complications                     |
| 32 |             |                                                                                                    |
| 33 | E13.1       | Other specified diabetes mellitus diabetes mellitus with coma                                      |
| 34 | E13.2       | Other specified diabetes mellitus diabetes mellitus with ketoacidosis                              |
| 35 | E13.3       | Other specified diabetes mellitus diabetes mellitus with renal complications                       |
| 36 | E13.4       | Other specified diabetes mellitus diabetes mellitus with ophthalmic complications                  |
| 37 | E13.5       | Other specified diabetes mellitus diabetes mellitus with neurological complications                |
| 38 | E13.6       | Other specified diabetes mellitus diabetes mellitus with peripheral circulatory complications      |
| 39 | E13.7       | Other specified diabetes mellitus diabetes mellitus with other specific complications              |
| 40 | E13.8       | Other specified diabetes mellitus diabetes mellitus with multiple complications                    |
| 41 | E13.9       | Other specified diabetes mellitus diabetes mellitus without complications                          |
| 42 |             |                                                                                                    |
| 43 | E14.1       | Unspecified diabetes mellitus diabetes mellitus with coma                                          |
| 44 | E14.2       | Unspecified diabetes mellitus diabetes mellitus with ketoacidosis                                  |
| 45 | E14.3       | Unspecified diabetes mellitus diabetes mellitus with renal complications                           |
| 46 | E14.4       | Unspecified diabetes mellitus diabetes mellitus with ophthalmic complications                      |
| 47 | E14.5       | Unspecified diabetes mellitus diabetes mellitus with neurological complications                    |
| 48 | E14.6       | Unspecified diabetes mellitus diabetes mellitus with peripheral circulatory complications          |
| 49 | E14.7       | Unspecified diabetes mellitus diabetes mellitus with other specific complications                  |
| 50 | E14.8       | Unspecified diabetes mellitus diabetes mellitus with multiple complications                        |
| 51 | E14.9       | Unspecified diabetes mellitus diabetes mellitus without complications                              |
| 52 |             |                                                                                                    |
| 53 |             |                                                                                                    |
| 54 |             |                                                                                                    |
| 55 |             |                                                                                                    |
| 56 |             |                                                                                                    |
| 57 |             |                                                                                                    |
| 58 |             |                                                                                                    |
| 59 |             |                                                                                                    |
| 60 |             |                                                                                                    |

1  
2  
3  
4  
5  
6  
7  
8  
9  
10  
11  
12  
13  
14  
15  
16  
17  
18  
19  
20  
21  
22  
23  
24  
25  
26  
27  
28  
29  
30  
31  
32  
33  
34  
35  
36  
37  
38  
39  
40  
41  
42  
43  
44  
45  
46  
47  
48  
49  
50  
51  
52  
53  
54  
55  
56  
57  
58  
59  
60

s

For peer review only



1  
2 Procodeid  
3 9851141000033117  
4 475141000033116  
5 548141000033117  
6 920741000033111  
7 391341000033118  
8 1430841000033118  
9 395141000033118  
10 8614041000033119  
11 8614141000033115  
12 256041000033110  
13 586541000033115  
14 750241000033113  
15 255941000033117  
16 255241000033114  
17 1608041000033116  
18 9850841000033118  
19 392041000033113  
20 256141000033114  
21 255141000033119  
22 391641000033114  
23 391741000033117  
24 391141000033116  
25 391541000033113  
26 391941000033119  
27 885441000033112  
28 474941000033115  
29 196141000033116  
30 1891841000033112  
31 395341000033115  
32 255741000033115  
33 391241000033111  
34 4907641000033116  
35 1891941000033116  
36 8963541000033110  
37 8963341000033115  
38 8963641000033111  
39 8963041000033117  
40 8962941000033110  
41 8963241000033113  
42 8963141000033118  
43 8963441000033114  
44 12198241000033110  
45 12198341000033117  
46 4259741000033112  
47 4259841000033119  
48 4157141000033115  
49 4157241000033110  
50 11695941000033111  
51 11696041000033118

For peer review only

1 8193041000033117  
2 8193241000033113  
3 8193341000033115  
4 8193141000033118  
5 4954641000033115  
6 4954741000033112  
7 3269141000033118  
8 3268841000033118  
9 3268941000033114  
10 3269041000033117  
11 2717041000033110  
12 2717141000033114  
13 3138941000033115  
14 3139041000033112  
15 8581041000033111  
16 8581241000033115  
17 8581341000033113  
18 8581141000033110  
19 8197241000033116  
20 3083841000033118  
21 3012541000033111  
22 947341000033112  
23 3083741000033111  
24 9851041000033116  
25 11800041000033110  
26 9850741000033111  
27 11807741000033112  
28 11800141000033114  
29 11799941000033116  
30 11800241000033119  
31 11807641000033115  
32 2271141000033116  
33 9158341000033117  
34 2270941000033113  
35 2270841000033117  
36 2271041000033115  
37 196041000033115  
38 6138541000033119  
39 196941000033119  
40 1035541000033115  
41 196841000033110  
42 10955641000033118  
43 10955741000033110  
44 12037141000033115  
45 3059241000033110  
46 3059341000033117  
47 148541000033118  
48 7860141000033114  
49 7860241000033119  
50 7860341000033112

For peer review only

1  
2 7860441000033118  
3 10642541000033111  
4 10642441000033110  
5 3152841000033114  
6 3152741000033116  
7  
8 825641000033117  
9 825741000033114  
10 248341000033110  
11 248441000033116  
12  
13 3097441000033111  
14 3872441000033118  
15 3872641000033116  
16 3872941000033111  
17 3872541000033117  
18  
19 12398041000033110  
20 274741000033119  
21 822741000033117  
22 4156641000033110  
23 4156541000033114  
24 12398141000033114  
25 3952941000033115  
26 3952841000033111  
27 10974641000033119  
28 10974541000033115  
29  
30 386541000033117  
31 535541000033117  
32 8200041000033113  
33 8199841000033110  
34 8199941000033119  
35 8200141000033112  
36 523041000033113  
37 395241000033113  
38 10217041000033110  
39 4156041000033116  
40 4156141000033117  
41 390241000033116  
42 390341000033114  
43 390141000033111  
44 2090341000033111  
45 3057441000033119  
46 3898641000033113  
47 12195941000033113  
48 3057341000033113  
49 12195841000033117  
50 2090241000033118  
51 3898541000033112  
52 2090041000033114  
53 2090141000033113  
54 8947641000033114  
55 8947541000033113

For peer review only

1 8947741000033117  
2 8947441000033112  
3 10388241000033111  
4 485641000033118  
5 10388341000033118  
6 421941000033118  
7 423841000033110  
8 4040741000033110  
9 3857341000033112  
10 333041000033113  
11 11693941000033112  
12 11694241000033118  
13 11694041000033114  
14 11694141000033113  
15 3994241000033113  
16 3994341000033115  
17 3994541000033110  
18 3994641000033111  
19 3994441000033114  
20 3994741000033119  
21 404741000033113  
22 404541000033117  
23 404641000033116  
24 8196341000033112  
25 8196241000033119  
26 4156941000033115  
27 4212641000033116  
28 4212741000033113  
29 4157041000033119  
30 9293441000033110  
31 474341000033119  
32 474441000033113  
33 6117341000033119  
34 1405941000033112  
35 10267341000033111  
36 9293541000033111  
37 6058941000033117  
38 10267541000033116  
39 5844941000033112  
40 5845241000033116  
41 6067041000033112  
42 6117141000033117  
43 1406041000033119  
44 6067141000033111  
45 6117241000033112  
46 10267441000033117  
47 5845041000033112  
48 5845141000033111  
49 4955741000033113  
50 4292641000033117

For peer review only

1  
2 4452841000033111  
3 4374741000033117  
4 2590141000033110  
5 4452741000033118  
6 2590041000033111  
7  
8 5845441000033115  
9 2590241000033115  
10 3964641000033114  
11 2589941000033118  
12 8838441000033117  
13 4374841000033110  
14 2038241000033112  
15 2212841000033110  
16 7877941000033115  
17 7877841000033111  
18 11667741000033115  
19 11667641000033112  
20 11667541000033111  
21 11667441000033110  
22 2746241000033110  
23 3997641000033116  
24 1073541000033119  
25 2746341000033117  
26 531841000033117  
27 531741000033110  
28 529241000033119  
29 529041000033110  
30 1073641000033118  
31 1077441000033114  
32 1073741000033110  
33 1077341000033115  
34 529341000033112  
35 6167441000033114  
36 6167541000033110  
37 3347941000033110  
38 3348041000033113  
39 3348241000033117  
40 3348141000033112  
41 540541000033112  
42 540641000033113  
43 2642041000033114  
44 547341000033118  
45 2642141000033113  
46 3983641000033110  
47 1506441000033117  
48 1506341000033111  
49 3983741000033118  
50 547541000033113  
51 4061141000033114  
52 4453741000033111

For peer review only

1 1607941000033119  
2 12188941000033117  
3 6470841000033117  
4 12189441000033117  
5 12188741000033115  
6 5292841000033112  
7 12189541000033116  
8 10334741000033117  
9 10334441000033112  
10 12189241000033118  
11 10334841000033110  
12 5292741000033119  
13 6471741000033117  
14 10334241000033111  
15 5292541000033110  
16 10334641000033114  
17 12189141000033113  
18 9118141000033112  
19 5292641000033111  
20 8233141000033111  
21 6471241000033111  
22 10334541000033113  
23 4374441000033112  
24 4374341000033118  
25 2258141000033111  
26 2258241000033116  
27 586441000033116  
28 579141000033110  
29 2799741000033116  
30 587041000033110  
31 2799841000033114  
32 2799641000033113  
33 2799541000033112  
34 587541000033117  
35 587141000033114  
36 5264741000033112  
37 5264641000033115  
38 11757341000033115  
39 630441000033119  
40 5976141000033112  
41 11665641000033118  
42 630641000033117  
43 11757541000033110  
44 11757441000033114  
45 11665541000033119  
46 5886241000033115  
47 630541000033118  
48 11757741000033119  
49 630341000033113  
50 11665441000033115

For peer review only

1  
2 11757641000033111  
3 7860541000033117  
4 7860641000033116  
5 3092941000033116  
6 728841000033110  
7  
8 10013741000033113  
9 10012941000033117  
10 749941000033114  
11 749841000033118  
12  
13 1548941000033115  
14 1547741000033117  
15 1547941000033119  
16 749441000033116  
17 1547841000033110  
18 749341000033110  
19  
20 1548841000033111  
21 749241000033117  
22 9703941000033112  
23 914141000033114  
24 750041000033117  
25 914041000033110  
26 750141000033118  
27 3050641000033118  
28 3050541000033119  
29 3177241000033114  
30 3177341000033116  
31 6428241000033115  
32 6428341000033113  
33 5355141000033111  
34 12185841000033116  
35 194941000033112  
36 4519141000033112  
37 775041000033114  
38 12185941000033112  
39 4519241000033117  
40 775141000033113  
41 194841000033116  
42 12330541000033110  
43 12330141000033118  
44 12330241000033113  
45 12330441000033114  
46 12330341000033115  
47 12330041000033117  
48 4522841000033118  
49 4522941000033114  
50 4188241000033115  
51 4187841000033117  
52 8839241000033114  
53 10494841000033114  
54 4187541000033119  
55  
56  
57  
58  
59  
60

For peer review only

1 4188141000033110  
2 8839141000033119  
3 10494541000033112  
4 4187641000033118  
5 10494741000033116  
6 4187741000033110  
7 4188041000033111  
8 4187941000033113  
9 10494641000033113  
10 10488241000033116  
11 11781741000033116  
12 11781841000033114  
13 10488341000033114  
14 10488541000033119  
15 10488441000033115  
16 841641000033116  
17 841741000033113  
18 903741000033112  
19 38541000033110  
20 38641000033111  
21 901641000033116  
22 2012141000033113  
23 2012241000033118  
24 899041000033116  
25 899141000033117  
26 1495241000033117  
27 4202841000033118  
28 4957041000033116  
29 1495141000033112  
30 4202941000033114  
31 913741000033110  
32 913841000033117  
33 913941000033113  
34 914441000033118  
35 2617241000033110  
36 915041000033111  
37 914941000033111  
38 2659941000033117  
39 3922341000033115  
40 3922241000033113  
41 2157041000033111  
42 3097241000033110  
43 3097341000033117  
44 2157141000033110  
45 3097141000033115  
46 2156941000033110  
47 11492541000033114  
48 11492141000033117  
49 4269341000033118  
50 4269441000033112

For peer review only



1  
2 4507541000033111  
3 4507641000033112  
4 10213141000033116  
5 10213241000033111  
6 10212841000033117  
7 10213041000033115  
8 10492141000033113  
9 10491841000033111  
10 10491941000033115  
11 10491741000033118  
12 10371941000033118  
13 10371741000033116  
14 12352841000033112  
15 12352741000033119  
16 12043541000033115  
17 12042941000033115  
18 11580041000033110  
19 11579841000033115  
20 11579741000033113  
21 11579941000033111  
22 4011441000033117  
23 1892041000033110  
24 3870741000033112  
25 4024741000033117  
26 3870641000033115  
27 3870841000033119  
28 4024841000033110  
29 4595041000033114  
30 1892141000033114  
31 4011541000033116  
32 3870941000033110  
33 1753741000033111  
34 1029541000033115  
35 3952141000033117  
36 1404241000033119  
37 3201541000033110  
38 3201641000033111  
39 1747941000033115  
40 7680641000033112  
41 4907741000033113  
42 11822741000033116  
43 11822841000033114  
44 11822941000033118  
45 11822541000033112  
46 11823041000033111  
47 11822641000033113  
48 3859041000033118  
49 3859141000033119  
50 4429441000033119  
51 4429341000033113

For peer review only

1 4806041000033116  
2 4806141000033117  
3 11275641000033114  
4 11275841000033110  
5 11275541000033113  
6 11275741000033117  
7 11275341000033118  
8 11275441000033112  
9 5833241000033118  
10 5832241000033113  
11 5832141000033118  
12 5832941000033116  
13 12292141000033119  
14 12292241000033114  
15 10599341000033111  
16 10599441000033117  
17 3217241000033119  
18 4806241000033112  
19 4806341000033119  
20 3217141000033114  
21 969841000033115  
22 1052641000033112  
23 8273941000033111  
24 8886841000033113  
25 8887041000033116  
26 8887141000033117  
27 8886941000033117  
28 3270341000033118  
29 2645141000033119  
30 2645241000033114  
31 3270241000033111  
32 1112241000033113  
33 1446641000033117  
34 1152341000033114  
35 10209441000033113  
36 10209641000033110  
37 10209741000033118  
38 10209541000033114  
39 1154241000033113  
40 8840041000033112  
41 8839941000033117  
42 8123841000033116  
43 8123941000033112  
44 8123641000033117  
45 8123541000033118  
46 8124041000033114  
47 8123741000033114  
48 3944041000033114  
49 3943941000033112  
50 3949941000033114

For peer review only

1  
2 3949841000033118  
3 3949741000033111  
4 3950241000033113  
5 3950041000033117  
6 3950141000033118  
7  
8 11420041000033110  
9 11420141000033114  
10 11419541000033118  
11 11419841000033116  
12  
13 2995041000033111  
14 2994941000033111  
15 5886641000033117  
16 1904741000033110  
17 1904841000033117  
18  
19 4326541000033119  
20 1904541000033119  
21 4326341000033114  
22 4326241000033116  
23 5886441000033119  
24 5886741000033114  
25 5886941000033112  
26 1904941000033113  
27 1905141000033112  
28 5886541000033118  
29 4326441000033115  
30 5886841000033116  
31 1905041000033113  
32 1904441000033115  
33 1904641000033118  
34 4803041000033114  
35 4803241000033118  
36 6455241000033110  
37 6455441000033111  
38 6455141000033115  
39 1430541000033115  
40 6455341000033117  
41 3102541000033119  
42 818041000033111  
43 11717441000033116  
44 11717541000033115  
45 11717741000033111  
46 11717641000033119  
47 9158941000033118  
48 1446841000033116  
49 6466841000033110  
50 4608241000033117  
51 4608141000033112  
52 4608441000033116  
53 2280341000033117  
54 9159041000033110  
55  
56  
57  
58  
59  
60

For peer review only

1 2280241000033110  
2 734641000033116  
3 8614541000033112  
4 4608341000033110  
5 10740541000033118  
6 10740241000033115  
7 10740441000033119  
8 10740341000033113  
9 2188541000033112  
10 2188441000033111  
11 9075041000033117  
12 9076141000033113  
13 9074941000033117  
14 9076041000033114  
15 1460341000033118  
16 1455041000033117  
17 2076541000033113  
18 1506241000033118  
19 1454941000033117  
20 7739541000033119  
21 7739741000033110  
22 7739841000033117  
23 7739641000033118  
24 6529941000033113  
25 6530041000033117  
26 11940041000033110  
27 11940241000033119  
28 11939841000033111  
29 11939941000033115  
30 11940141000033114  
31 11940341000033112  
32 1508741000033113  
33 3997441000033118  
34 3982941000033114  
35 3997541000033117  
36 1005441000033112  
37 1519641000033110  
38 504241000033114  
39 1518641000033118  
40 1518541000033119  
41 9104141000033115  
42 3347541000033116  
43 3347441000033117  
44 951841000033112  
45 3347741000033112  
46 9104041000033119  
47 3347641000033115  
48 951741000033119  
49 8560941000033116  
50 8561041000033114

For peer review only

1  
2 8561041000033114  
3  
4  
5  
6  
7  
8  
9  
10  
11  
12  
13  
14  
15  
16  
17  
18  
19  
20  
21  
22  
23  
24  
25  
26  
27  
28  
29  
30  
31  
32  
33  
34  
35  
36  
37  
38  
39  
40  
41  
42  
43  
44  
45  
46  
47  
48  
49  
50  
51  
52  
53  
54  
55  
56  
57  
58  
59  
60

For peer review only

## 1 Term

2  
3 Cometriq 20mg capsules and Cometriq 80mg capsules (Ipsen Ltd)  
4 Doxorubicin Hydrochloride Injection 50 mg  
5 Etoposide Injection 20 mg/ml  
6 Mitobronitol Tablets 125 mg  
7 Cytarabine Injection 500 mg vial  
8 Thiotepa(With Sodium Chloride And Bicarbonate) Injection 15mg vial  
9 Cyclophosphamide Tablets 10 mg  
10 Docetaxel Solution For Infusion And Diluent 20 mg/2 ml vial  
11 Docetaxel Solution For Infusion And Diluent 80 mg/8 ml vial  
12 Cisplatin Injection 450 mg/vial  
13 Fludarabine Phosphate Injection 50 mg/vial  
14 Ifosfamide Injection 500 mg vial  
15 Cisplatin Injection 150 mg/vial  
16 Cisplatin Injection 500 micrograms/ml  
17 Etoposide Phosphate Injection 100 mg/vial  
18 Cabozantinib 20mg capsules and Cabozantinib 80mg capsules  
19 Cyclophosphamide Injection 1.07 g/vial  
20 Cisplatin Injection 1 mg/ml  
21 Cisplatin Injection 10 mg/vial  
22 Cyclophosphamide Injection 214 mg/vial  
23 Cyclophosphamide Injection 535 mg/vial  
24 Cytarabine Injection 100 mg/ml  
25 Cyclophosphamide Injection 107 mg/vial  
26 Cyclophosphamide Injection  
27 Melphalan Injection 100 mg vial  
28 Doxorubicin Hydrochloride Injection 10 mg  
29 Carmustine Injection 100 mg vial  
30 Oxaliplatin Powder For Solution For Injection 50 mg/vial  
31 Cyclophosphamide 50 Tablets 50 mg  
32 Cisplatin Injection 50 mg/vial  
33 Cytarabine Injection 20 mg/ml  
34 Paclitaxel Powder For Suspension For Infusion 100 mg vial  
35 Oxaliplatin Powder For Solution For Injection 100 mg/vial  
36 Giotrif 40mg tablets (Boehringer Ingelheim Ltd)  
37 Giotrif 20mg tablets (Boehringer Ingelheim Ltd)  
38 Giotrif 50mg tablets (Boehringer Ingelheim Ltd)  
39 Afatinib 30mg tablets  
40 Afatinib 20mg tablets  
41 Afatinib 50mg tablets  
42 Afatinib 40mg tablets  
43 Giotrif 30mg tablets (Boehringer Ingelheim Ltd)  
44 Alectinib 150mg capsules  
45 Alecensa 150mg capsules (Roche Products Ltd)  
46 Amsacrine 75mg/1.5ml solution for infusion ampoules and diluent  
47 Amsidine 75mg/1.5ml solution for infusion ampoules and diluent (Eurocept International bv)  
48 Arsenic 10mg/10ml solution for infusion ampoules  
49 Trisenox 10mg/10ml concentrate for solution for infusion ampoules (Teva UK Ltd)  
50 Asparaginase 10,000unit powder for solution for infusion vials  
51 Spectrila 10,000unit powder for concentrate for solution for infusion vials (medac UK)  
52  
53  
54  
55  
56  
57  
58  
59  
60

1 Axitinib 1mg tablets  
2 Inlyta 1mg tablets (Pfizer Ltd)  
3 Inlyta 5mg tablets (Pfizer Ltd)  
4 Axitinib 5mg tablets  
5 Azacitidine 100mg powder for suspension for injection vials  
6 Vidaza 100mg powder for suspension for injection vials (Celgene Ltd)  
7 Avastin 400mg/16ml solution for infusion vials (Roche Products Ltd)  
8 Bevacizumab 100mg/4ml solution for infusion vials  
9 Bevacizumab 400mg/16ml solution for infusion vials  
10 Avastin 100mg/4ml solution for infusion vials (Roche Products Ltd)  
11 Bexarotene 75mg capsules  
12 Targretin 75mg capsules (Eisai Ltd)  
13 Bortezomib 3.5mg powder for solution for injection vials  
14 Velcade 3.5mg powder for solution for injection vials (Janssen-Cilag Ltd)  
15 Bosutinib 100mg tablets  
16 Bosulif 500mg tablets (Pfizer Ltd)  
17 Bosulif 100mg tablets (Pfizer Ltd)  
18 Bosutinib 500mg tablets  
19 Adcetris 50mg powder for concentrate for solution for infusion vials (Takeda UK Ltd)  
20 Busulfan 60mg/10ml solution for infusion ampoules  
21 Busilvex 60mg/10ml concentrate for solution for infusion ampoules (Pierre Fabre Ltd)  
22 Myleran 2mg tablets (Aspen Pharma Trading Ltd)  
23 Busulfan 2mg tablets  
24 Cometriq 20mg capsules (Ipsen Ltd)  
25 Cabozantinib 40mg tablets  
26 Cabozantinib 20mg capsules  
27 Cabometyx 60mg tablets (Ipsen Ltd)  
28 Cabometyx 20mg tablets (Ipsen Ltd)  
29 Cabozantinib 20mg tablets  
30 Cabometyx 40mg tablets (Ipsen Ltd)  
31 Cabozantinib 60mg tablets  
32 Xeloda 500mg tablets (Roche Products Ltd)  
33 Capecitabine 300mg tablets  
34 Capecitabine 500mg tablets  
35 Capecitabine 150mg tablets  
36 Xeloda 150mg tablets (Roche Products Ltd)  
37 Carboplatin 150mg/15ml solution for infusion vials  
38 Carboplatin 600mg/60ml solution for infusion vials  
39 Carboplatin 50mg/5ml solution for infusion vials  
40 Paraplatin 50mg/5ml solution for infusion vials (Bristol-Myers Squibb Pharmaceuticals Ltd)  
41 Carboplatin 450mg/45ml solution for infusion vials  
42 Carfilzomib 60mg powder for solution for infusion vials  
43 Kyprolis 60mg powder for solution for infusion vials (Amgen Ltd)  
44 Carmustine 100mg powder and solvent for solution for injection vials  
45 Carmustine 7.7mg implant  
46 Gliadel 7.7mg implant (Eisai Ltd)  
47 BiCNU 100mg powder and solvent for solution for infusion vials (Bristol-Myers Squibb Pharmaceuticals Ltd)  
48 Catumaxomab 10micrograms/0.1ml solution for infusion pre-filled syringes  
49 Catumaxomab 50micrograms/0.5ml solution for infusion pre-filled syringes  
50 Removab 10micrograms/0.1ml concentrate for solution for infusion pre-filled syringes (Neovii Biotech GmbH)

1 Removab 50micrograms/0.5ml concentrate for solution for infusion pre-filled syringes (Neovii Biotech GmbH)  
2 Zykadia 150mg capsules (Novartis Pharmaceuticals UK Ltd)  
3 Ceritinib 150mg capsules  
4 Erbitux 100mg/50ml solution for infusion vials (Merck Serono Ltd)  
5 Cetuximab 100mg/50ml solution for infusion vials  
6 Leukeran 2mg tablets (Aspen Pharma Trading Ltd)  
7 Leukeran 5mg tablets (GlaxoSmithKline UK Ltd)  
8 Chlorambucil 2mg tablets  
9 Chlorambucil 5mg tablets  
10 Chlormethine 10mg solution for injection vials  
11 Cisplatin 50mg powder for solution for infusion vials  
12 Cisplatin 100mg/100ml solution for infusion vials  
13 Cisplatin 10mg/10ml solution for infusion vials  
14 Cisplatin 50mg/50ml solution for infusion vials  
15 Cladribine 10mg tablets  
16 Cladribine 10mg/10ml solution for infusion vials  
17 Leustat 10mg/10ml solution for infusion vials (Janssen-Cilag Ltd)  
18 Litak 10mg/5ml solution for injection vials (Lipomed GmbH)  
19 Cladribine 10mg/5ml solution for injection vials  
20 Mavenclad 10mg tablets (Merck Serono Ltd)  
21 Evoltra 20mg/20ml concentrate for solution for infusion vials (Sanofi)  
22 Clofarabine 20mg/20ml solution for infusion vials  
23 Cotellic 20mg tablets (Roche Products Ltd)  
24 Cobimetinib 20mg tablets  
25 Crisantaspase 10,000unit powder for solution for injection vials  
26 Erwinase 10,000unit powder for solution for injection vials (EUSA Pharma Ltd)  
27 Xalkori 200mg capsules (Pfizer Ltd)  
28 Crizotinib 200mg capsules  
29 Crizotinib 250mg capsules  
30 Xalkori 250mg capsules (Pfizer Ltd)  
31 Endoxana 50mg tablets (Baxter Healthcare Ltd)  
32 Cyclophosphamide 50mg tablets  
33 Cyclophosphamide 2g powder for solution for injection vials  
34 Endoxana 500mg powder for solution for injection vials (Baxter Healthcare Ltd)  
35 Endoxana 1g powder for solution for injection vials (Baxter Healthcare Ltd)  
36 Cyclophosphamide 200mg powder for solution for injection vials  
37 Cyclophosphamide 500mg powder for solution for injection vials  
38 Cyclophosphamide 1g powder for solution for injection vials  
39 Cytarabine 2g/20ml solution for injection vials  
40 DepoCyte 50mg/5ml suspension for injection vials (Napp Pharmaceuticals Ltd)  
41 Cytarabine 500mg/5ml solution for injection vials  
42 Cytarabine 5g/50ml solution for infusion vials  
43 Cytarabine (liposomal) 50mg/5ml suspension for injection vials  
44 Cytarabine 4g/40ml solution for injection vials  
45 Cytarabine 1g/10ml solution for injection vials  
46 Cytarabine 100mg/1ml solution for injection vials  
47 Cytarabine 100mg/5ml solution for injection vials  
48 Cytarabine 500mg/25ml solution for injection vials  
49 Tafinlar 50mg capsules (Novartis Pharmaceuticals UK Ltd)  
50 Dabrafenib 75mg capsules



1 Tafinlar 75mg capsules (Novartis Pharmaceuticals UK Ltd)  
2 Dabrafenib 50mg capsules  
3 Dacarbazine 1g powder for solution for infusion vials  
4 DTIC-Dome 200mg powder for solution for injection vials (Bayer Plc)  
5 Dacarbazine 500mg powder for solution for infusion vials  
6 Dacarbazine 100mg powder for solution for injection vials  
7 Dacarbazine 200mg powder for solution for injection vials  
8 Dacarbazine 600mg powder for solution for infusion vials  
9 Dactinomycin 500microgram powder for solution for injection vials  
10 Cosmegen Lyovac 500microgram powder for solution for injection vials (Orphan Europe (UK) Ltd)  
11 Daratumumab 100mg/5ml solution for infusion vials  
12 Darzalex 400mg/20ml concentrate for solution for infusion vials (Janssen-Cilag Ltd)  
13 Daratumumab 400mg/20ml solution for infusion vials  
14 Darzalex 100mg/5ml concentrate for solution for infusion vials (Janssen-Cilag Ltd)  
15 Dasatinib 20mg tablets  
16 Dasatinib 50mg tablets  
17 Sprycel 20mg tablets (Bristol-Myers Squibb Pharmaceuticals Ltd)  
18 Sprycel 50mg tablets (Bristol-Myers Squibb Pharmaceuticals Ltd)  
19 Dasatinib 70mg tablets  
20 Sprycel 70mg tablets (Bristol-Myers Squibb Pharmaceuticals Ltd)  
21 Daunorubicin 20mg powder for solution for infusion vials  
22 DaunoXome 50mg emulsion for infusion vials (Galen Ltd)  
23 Daunorubicin (liposomal) 50mg emulsion for infusion vials  
24 Dacogen 50mg powder for concentrate for solution for infusion vials (Janssen-Cilag Ltd)  
25 Decitabine 50mg powder for solution for infusion vials  
26 Dexrazoxane 500mg powder and solvent for solution for infusion vials  
27 Dexrazoxane 500mg powder for solution for infusion vials  
28 Cardioxane 500mg powder for solution for infusion vials (Clinigen Healthcare Ltd)  
29 Savene 500mg powder for concentrate and solvent for solution for infusion vials (Clinigen Healthcare Ltd)  
30 Docetaxel 20mg/0.72ml solution for infusion vials and diluent  
31 Docetaxel 20mg/0.5ml solution for infusion vials and diluent  
32 Docetaxel 80mg/2ml solution for infusion vials and diluent  
33 Taxceus 80mg/4ml concentrate for solution for infusion vials (medac UK)  
34 Taxotere 20mg/0.5ml solution for infusion vials and diluent (Sanofi)  
35 Docetaxel 160mg/16ml solution for infusion vials  
36 Docetaxel 80mg/2.88ml solution for infusion vials and diluent  
37 Docetaxel 140mg/7ml solution for infusion vials  
38 Docetaxel 20mg/2ml solution for infusion vials  
39 Docetaxel 20mg/1ml solution for infusion vials  
40 Taxotere 80mg/4ml concentrate for solution for infusion vials (Sanofi)  
41 Docetaxel 160mg/8ml solution for infusion vials  
42 Taxceus 140mg/7ml concentrate for solution for infusion vials (medac UK)  
43 Taxotere 80mg/2ml solution for infusion vials and diluent (Sanofi)  
44 Taxotere 160mg/8ml concentrate for solution for infusion vials (Sanofi)  
45 Taxceus 20mg/1ml concentrate for solution for infusion vials (medac UK)  
46 Docetaxel 80mg/8ml solution for infusion vials  
47 Docetaxel 80mg/4ml solution for infusion vials  
48 Taxotere 20mg/1ml concentrate for solution for infusion vials (Sanofi)  
49 Doxorubicin 200mg/100ml solution for infusion vials  
50 Doxorubicin (liposomal) 50mg powder and solvent for suspension for infusion vials  
51  
52  
53  
54  
55  
56  
57  
58  
59  
60

1 Doxorubicin 50mg/25ml solution for injection Cytosafe vials (Pfizer Ltd)  
2 Doxorubicin 10mg powder for solution for injection vials  
3 Doxorubicin 10mg/5ml solution for injection vials  
4 Doxorubicin 10mg/5ml solution for injection Cytosafe vials (Pfizer Ltd)  
5 Doxorubicin Rapid Dissolution 50mg powder for solution for injection vials (Pfizer Ltd)  
6 Doxorubicin 200mg/100ml solution for injection Cytosafe vials (Pfizer Ltd)  
7 Doxorubicin 50mg/25ml solution for injection vials  
8 Myocet 50mg powder and solvent for suspension for infusion vials (Teva UK Ltd)  
9 Doxorubicin Rapid Dissolution 10mg powder for solution for injection vials (Pfizer Ltd)  
10 Doxorubin 50mg powder for solution for injection vials (medac UK)  
11 Doxorubicin 50mg powder for solution for injection vials  
12 Caelyx 20mg/10ml concentrate for solution for infusion vials (Janssen-Cilag Ltd)  
13 Caelyx 50mg/25ml concentrate for solution for infusion vials (Janssen-Cilag Ltd)  
14 Doxorubicin liposomal pegylated 50mg/25ml solution for infusion vials  
15 Doxorubicin liposomal pegylated 20mg/10ml solution for infusion vials  
16 Empliciti 400mg powder for concentrate for solution for infusion vials (Bristol-Myers Squibb Pharmaceuticals L  
17 Empliciti 300mg powder for concentrate for solution for infusion vials (Bristol-Myers Squibb Pharmaceuticals L  
18 Elotuzumab 400mg powder for solution for infusion vials  
19 Elotuzumab 300mg powder for solution for infusion vials  
20 Pharmorubicin 200mg/100ml solution for infusion Cytosafe vials (Pfizer Ltd)  
21 Epirubicin 100mg/50ml solution for infusion vials  
22 Pharmorubicin Rapid Dissolution 10mg powder for solution for injection vials (Pfizer Ltd)  
23 Epirubicin 200mg/100ml solution for infusion vials  
24 Epirubicin 50mg/25ml solution for injection vials  
25 Epirubicin 10mg/5ml solution for injection vials  
26 Epirubicin 20mg powder for solution for injection vials  
27 Epirubicin 10mg powder for solution for injection vials  
28 Pharmorubicin Rapid Dissolution 20mg powder for solution for injection vials (Pfizer Ltd)  
29 Pharmorubicin 50mg/25ml solution for injection Cytosafe vials (Pfizer Ltd)  
30 Pharmorubicin Rapid Dissolution 50mg powder for solution for injection vials (Pfizer Ltd)  
31 Pharmorubicin 10mg/5ml solution for injection Cytosafe vials (Pfizer Ltd)  
32 Epirubicin 50mg powder for solution for injection vials  
33 Eribulin 880micrograms/2ml solution for injection vials  
34 Halaven 0.88mg/2ml solution for injection vials (Eisai Ltd)  
35 Erlotinib 100mg tablets  
36 Erlotinib 150mg tablets  
37 Tarceva 150mg tablets (Roche Products Ltd)  
38 Tarceva 100mg tablets (Roche Products Ltd)  
39 Estracyt 140mg capsules (Pfizer Ltd)  
40 Estramustine 140mg capsules  
41 Eposin 100mg/5ml concentrate for solution for infusion vials (medac UK)  
42 Etoposide 100mg capsules  
43 Eposin 500mg/25ml concentrate for solution for infusion vials (medac UK)  
44 Etoposide 100mg/5ml solution for infusion vials  
45 Vepesid 50mg capsules (Bristol-Myers Squibb Pharmaceuticals Ltd)  
46 Vepesid 100mg capsules (Bristol-Myers Squibb Pharmaceuticals Ltd)  
47 Etoposide 500mg/25ml solution for infusion vials  
48 Etoposide 50mg capsules  
49 Vepesid 100mg/5ml solution for infusion vials (Bristol-Myers Squibb Pharmaceuticals Ltd)  
50 Etoposide 100mg powder for solution for injection vials

1 Etopophos 100mg powder for solution for injection vials (Bristol-Myers Squibb Pharmaceuticals Ltd)  
2 Everolimus 3mg dispersible tablets sugar free  
3 Everolimus 2.5mg tablets  
4 Votubia 3mg dispersible tablets (Novartis Pharmaceuticals UK Ltd)  
5 Everolimus 2mg dispersible tablets sugar free  
6 Afinitor 10mg tablets (Novartis Pharmaceuticals UK Ltd)  
7 Votubia 5mg dispersible tablets (Novartis Pharmaceuticals UK Ltd)  
8 Certican 0.5mg tablets (Novartis Pharmaceuticals UK Ltd)  
9 Everolimus 250microgram tablets  
10 Votubia 2mg dispersible tablets (Novartis Pharmaceuticals UK Ltd)  
11 Certican 0.75mg tablets (Novartis Pharmaceuticals UK Ltd)  
12 Afinitor 5mg tablets (Novartis Pharmaceuticals UK Ltd)  
13 Votubia 5mg tablets (Novartis Pharmaceuticals UK Ltd)  
14 Everolimus 500microgram tablets  
15 Everolimus 5mg tablets  
16 Certican 0.25mg tablets (Novartis Pharmaceuticals UK Ltd)  
17 Everolimus 5mg dispersible tablets sugar free  
18 Afinitor 2.5mg tablets (Novartis Pharmaceuticals UK Ltd)  
19 Everolimus 10mg tablets  
20 Votubia 10mg tablets (Novartis Pharmaceuticals UK Ltd)  
21 Votubia 2.5mg tablets (Novartis Pharmaceuticals UK Ltd)  
22 Everolimus 750microgram tablets  
23 Fludarabine phosphate 50mg/2ml solution for injection vials  
24 Fludarabine phosphate 50mg powder for solution for injection vials  
25 Fludarabine phosphate 10mg tablets  
26 Fludara 10mg tablets (Sanofi)  
27 Fludara 50mg powder for solution for injection vials (Sanofi)  
28 Fluorouracil 250mg capsules  
29 Fluorouracil 2.5g/50ml solution for infusion vials  
30 Fluorouracil 2.5g/100ml solution for infusion vials  
31 Fluorouracil 5g/100ml solution for infusion vials  
32 Fluorouracil 1g/20ml solution for injection vials  
33 Fluorouracil 500mg/10ml solution for injection vials  
34 Fluorouracil 250mg/10ml solution for injection vials  
35 Fluorouracil 500mg/20ml solution for injection vials  
36 Iressa 250mg tablets (AstraZeneca UK Ltd)  
37 Gefitinib 250mg tablets  
38 Gemcitabine 1.2g/120ml infusion bags  
39 Gemzar 200mg powder for solution for infusion vials (Eli Lilly and Company Ltd)  
40 Gemcitabine 2g powder for solution for infusion vials  
41 Gemcitabine 200mg/5ml solution for infusion vials  
42 Gemcitabine 200mg powder for solution for infusion vials  
43 Gemcitabine 1.8g/180ml infusion bags  
44 Gemcitabine 1.6g/160ml infusion bags  
45 Gemcitabine 2g/50ml solution for infusion vials  
46 Gemcitabine 1.5g powder for solution for infusion vials  
47 Gemcitabine 1g powder for solution for infusion vials  
48 Gemcitabine 2.2g/220ml infusion bags  
49 Gemzar 1g powder for solution for infusion vials (Eli Lilly and Company Ltd)  
50 Gemcitabine 1g/25ml solution for infusion vials

1 Gemcitabine 2g/200ml infusion bags  
2 Teysuno 15mg/4.35mg/11.8mg capsules (Nordic Pharma Ltd)  
3 Teysuno 20mg/5.8mg/15.8mg capsules (Nordic Pharma Ltd)  
4 Hydroxycarbamide 500mg capsules  
5 Hydrea 500mg capsules (Bristol-Myers Squibb Pharmaceuticals Ltd)  
6 Imbruvica 140mg capsules (Janssen-Cilag Ltd)  
7 Ibrutinib 140mg capsules  
8 Idarubicin 5mg powder for solution for injection vials  
9 Idarubicin 10mg powder for solution for injection vials  
10 Zavedos 10mg powder for solution for injection vials (Pfizer Ltd)  
11 Zavedos 10mg capsules (Pfizer Ltd)  
12 Zavedos 5mg capsules (Pfizer Ltd)  
13 Idarubicin 5mg capsules  
14 Zavedos 25mg capsules (Pfizer Ltd)  
15 Idarubicin 25mg capsules  
16 Zavedos 5mg powder for solution for injection vials (Pfizer Ltd)  
17 Idarubicin 10mg capsules  
18 Zydelig 150mg tablets (Gilead Sciences International Ltd)  
19 Mitoxana 2g powder for solution for injection vials (Baxter Healthcare Ltd)  
20 Ifosfamide 1g powder for solution for injection vials  
21 Mitoxana 1g powder for solution for injection vials (Baxter Healthcare Ltd)  
22 Ifosfamide 2g powder for solution for injection vials  
23 Glivec 400mg tablets (Novartis Pharmaceuticals UK Ltd)  
24 Imatinib 400mg tablets  
25 Imatinib 100mg tablets  
26 Glivec 100mg tablets (Novartis Pharmaceuticals UK Ltd)  
27 Yervoy 200mg/40ml concentrate for solution for infusion vials (Bristol-Myers Squibb Pharmaceuticals Ltd)  
28 Yervoy 50mg/10ml concentrate for solution for infusion vials (Bristol-Myers Squibb Pharmaceuticals Ltd)  
29 Irinotecan 500mg/25ml solution for infusion vials  
30 Irinotecan 50mg/10ml solution for infusion vials  
31 Campto 100mg/5ml concentrate for solution for infusion vials (Pfizer Ltd)  
32 Irinotecan 300mg/15ml solution for infusion vials  
33 Irinotecan 40mg/2ml solution for infusion vials  
34 Onivyde 50mg/10ml concentrate for solution for infusion vials (Baxalta UK Ltd)  
35 Campto 300mg/15ml concentrate for solution for infusion vials (Pfizer Ltd)  
36 Irinotecan 100mg/5ml solution for infusion vials  
37 Campto 40mg/2ml concentrate for solution for infusion vials (Pfizer Ltd)  
38 Ninlaro 4mg capsules (Takeda UK Ltd)  
39 Ixazomib 3mg capsules  
40 Ixazomib 4mg capsules  
41 Ninlaro 3mg capsules (Takeda UK Ltd)  
42 Ninlaro 2.3mg capsules (Takeda UK Ltd)  
43 Ixazomib 2.3mg capsules  
44 Lapatinib 250mg tablets  
45 Tyverb 250mg tablets (Novartis Pharmaceuticals UK Ltd)  
46 Revlimid 25mg capsules (Celgene Ltd)  
47 Lenalidomide 25mg capsules  
48 Revlimid 2.5mg capsules (Celgene Ltd)  
49 Revlimid 20mg capsules (Celgene Ltd)  
50 Lenalidomide 5mg capsules

- 1
- 2 Revlimid 15mg capsules (Celgene Ltd)
- 3 Lenalidomide 2.5mg capsules
- 4 Lenalidomide 7.5mg capsules
- 5 Lenalidomide 10mg capsules
- 6 Lenalidomide 20mg capsules
- 7 Lenalidomide 15mg capsules
- 8 Revlimid 10mg capsules (Celgene Ltd)
- 9 Revlimid 5mg capsules (Celgene Ltd)
- 10 Revlimid 7.5mg capsules (Celgene Ltd)
- 11 Lenvatinib 4mg capsules
- 12 Kisplyx 10mg capsules (Eisai Ltd)
- 13 Kisplyx 4mg capsules (Eisai Ltd)
- 14 Lenvima 4mg capsules (Eisai Ltd)
- 15 Lenvima 10mg capsules (Eisai Ltd)
- 16 Lenvatinib 10mg capsules
- 17 Lomustine 10mg capsules
- 18 Lomustine 40mg capsules
- 19 Melphalan 5mg tablets
- 20 Alkeran 2mg tablets (Aspen Pharma Trading Ltd)
- 21 Alkeran 5mg tablets (GlaxoSmithKline UK Ltd)
- 22 Melphalan 2mg tablets
- 23 Melphalan 50mg powder and solvent for solution for injection vials
- 24 Alkeran 50mg powder and solvent for solution for injection vials (Aspen Pharma Trading Ltd)
- 25 Mesna 400mg tablets
- 26 Mesna 600mg tablets
- 27 Uromitexan 600mg tablets (Baxter Healthcare Ltd)
- 28 Mesna 400mg/4ml solution for injection ampoules
- 29 Mesna 1g/10ml solution for injection ampoules
- 30 Uromitexan 400mg tablets (Baxter Healthcare Ltd)
- 31 Uromitexan 400mg/4ml solution for injection ampoules (Baxter Healthcare Ltd)
- 32 Mitomycin-C Kyowa 10mg powder for solution for injection vials (Kyowa Kirin Ltd)
- 33 Mitomycin-C Kyowa 2mg powder for solution for injection vials (Kyowa Kirin Ltd)
- 34 Mitomycin-C Kyowa 20mg powder for solution for injection vials (Kyowa Kirin Ltd)
- 35 Mitomycin 10mg powder for solution for injection vials
- 36 Mitomycin-C Kyowa 40mg powder for solution for injection vials (Kyowa Kirin Ltd)
- 37 Mitomycin 20mg powder for solution for injection vials
- 38 Mitomycin 2mg powder for solution for injection vials
- 39 Mitomycin 40mg powder for solution for injection vials
- 40 Lysodren 500mg tablets (HRA Pharma UK Ltd)
- 41 Mitotane 500mg tablets
- 42 Onkotrone 25mg/12.5ml solution for infusion vials (Baxter Healthcare Ltd)
- 43 Mitoxantrone 25mg/12.5ml solution for infusion vials
- 44 Mitoxantrone 30mg/15ml solution for infusion vials
- 45 Onkotrone 30mg/15ml solution for infusion vials (ASTA Medica Ltd)
- 46 Mitoxantrone 20mg/10ml solution for infusion vials
- 47 Onkotrone 20mg/10ml solution for infusion vials (Baxter Healthcare Ltd)
- 48 Portrazza 800mg/50ml concentrate for solution for infusion vials (Eli Lilly and Company Ltd)
- 49 Nectinumab 800mg/50ml solution for infusion vials
- 50 Nelarabine 250mg/50ml solution for infusion vials
- 51 Atriance 250mg/50ml solution for infusion vials (Novartis Pharmaceuticals UK Ltd)
- 52
- 53
- 54
- 55
- 56
- 57
- 58
- 59
- 60

1 Nilotinib 200mg capsules  
2 Tasigna 200mg capsules (Novartis Pharmaceuticals UK Ltd)  
3 Vargatef 100mg capsules (Boehringer Ingelheim Ltd)  
4 Vargatef 150mg capsules (Boehringer Ingelheim Ltd)  
5 Nintedanib 100mg capsules  
6 Nintedanib 150mg capsules  
7 Opdivo 40mg/4ml concentrate for solution for infusion vials (Bristol-Myers Squibb Pharmaceuticals Ltd)  
8 Nivolumab 40mg/4ml solution for infusion vials  
9 Opdivo 100mg/10ml concentrate for solution for infusion vials (Bristol-Myers Squibb Pharmaceuticals Ltd)  
10 Nivolumab 100mg/10ml solution for infusion vials  
11 Lynparza 50mg capsules (AstraZeneca UK Ltd)  
12 Olaparib 50mg capsules  
13 Lartruvo 190mg/19ml concentrate for solution for infusion vials (Eli Lilly and Company Ltd)  
14 Olaratumab 190mg/19ml solution for infusion vials  
15 Lartruvo 500mg/50ml concentrate for solution for infusion vials (Eli Lilly and Company Ltd)  
16 Olaratumab 500mg/50ml solution for infusion vials  
17 Tagrisso 80mg tablets (AstraZeneca UK Ltd)  
18 Osimertinib 80mg tablets  
19 Osimertinib 40mg tablets  
20 Tagrisso 40mg tablets (AstraZeneca UK Ltd)  
21 Eloxatin 200mg/40ml concentrate for solution for infusion vials (Sanofi)  
22 Eloxatin 50mg powder for solution for infusion vials (Sanofi)  
23 Oxaliplatin 100mg/20ml solution for infusion vials  
24 Oxaliplatin 50mg powder for solution for infusion vials  
25 Oxaliplatin 50mg/10ml solution for infusion vials  
26 Eloxatin 50mg/10ml concentrate for solution for infusion vials (Sanofi)  
27 Oxaliplatin 100mg powder for solution for infusion vials  
28 Oxaliplatin 150mg powder for solution for infusion vials  
29 Eloxatin 100mg powder for solution for infusion vials (Sanofi)  
30 Oxaliplatin 200mg/40ml solution for infusion vials  
31 Eloxatin 100mg/20ml concentrate for solution for infusion vials (Sanofi)  
32 Taxol 100mg/16.7ml solution for infusion vials (Bristol-Myers Squibb Pharmaceuticals Ltd)  
33 Paclitaxel 30mg/5ml solution for infusion vials  
34 Paclitaxel 300mg/50ml solution for infusion vials  
35 Taxol 30mg/5ml solution for infusion vials (Bristol-Myers Squibb Pharmaceuticals Ltd)  
36 Paclitaxel 150mg/25ml solution for infusion vials  
37 Taxol 150mg/25ml solution for infusion vials (Bristol-Myers Squibb Pharmaceuticals Ltd)  
38 Paclitaxel 100mg/16.7ml solution for infusion vials  
39 Paclitaxel albumin 100mg powder for suspension for infusion vials  
40 Abraxane 100mg powder for suspension for infusion vials (Celgene Ltd)  
41 Palbociclib 125mg capsules  
42 Ibrance 75mg capsules (Pfizer Ltd)  
43 Ibrance 100mg capsules (Pfizer Ltd)  
44 Palbociclib 75mg capsules  
45 Ibrance 125mg capsules (Pfizer Ltd)  
46 Palbociclib 100mg capsules  
47 Palifermin 6.25mg powder for solution for injection vials  
48 Kepivance 6.25mg powder for solution for injection vials (Swedish Orphan Biovitrum Ltd)  
49 Vectibix 100mg/5ml concentrate for solution for infusion vials (Amgen Ltd)  
50 Panitumumab 100mg/5ml solution for infusion vials



1 Panitumumab 400mg/20ml solution for infusion vials  
2 Vectibix 400mg/20ml concentrate for solution for infusion vials (Amgen Ltd)  
3 Farydak 10mg capsules (Novartis Pharmaceuticals UK Ltd)  
4 Farydak 20mg capsules (Novartis Pharmaceuticals UK Ltd)  
5 Panobinostat 20mg capsules  
6 Farydak 15mg capsules (Novartis Pharmaceuticals UK Ltd)  
7 Panobinostat 10mg capsules  
8 Panobinostat 15mg capsules  
9 Votrient 400mg tablets (Novartis Pharmaceuticals UK Ltd)  
10 Pazopanib 400mg tablets  
11 Pazopanib 200mg tablets  
12 Votrient 200mg tablets (Novartis Pharmaceuticals UK Ltd)  
13 Pegaspargase 3,750units/5ml solution for injection vials  
14 Oncaspar 3,750units/5ml solution for injection vials (Imported (United States))  
15 Pembrolizumab 50mg powder for solution for infusion vials  
16 Keytruda 50mg powder for concentrate for solution for infusion vials (Merck Sharp & Dohme Ltd)  
17 Alimta 500mg powder for concentrate for solution for infusion vials (Eli Lilly and Company Ltd)  
18 Pemetrexed 100mg powder for solution for infusion vials  
19 Alimta 100mg powder for concentrate for solution for infusion vials (Eli Lilly and Company Ltd)  
20 Pemetrexed 500mg powder for solution for infusion vials  
21 Nipent 10mg powder for solution for injection vials (Hospira UK Ltd)  
22 Pentostatin 10mg powder for solution for injection vials  
23 Perjeta 420mg/14ml concentrate for solution for infusion vials (Roche Products Ltd)  
24 Ponatinib 15mg tablets  
25 Iclusig 15mg tablets (Incyte Biosciences UK Ltd)  
26 Iclusig 45mg tablets (Incyte Biosciences UK Ltd)  
27 Ponatinib 45mg tablets  
28 Porfimer sodium 75mg powder for solution for injection vials  
29 Photofrin 15mg powder for solution for injection vials (Axcen Pharma Inc)  
30 Photofrin 75mg powder for solution for injection vials (Pinnacle Biologics BV)  
31 Porfimer sodium 15mg powder for solution for injection vials  
32 Procarbazine 50mg capsules  
33 Tomudex 2mg powder for solution for infusion vials (Hospira UK Ltd)  
34 Raltitrexed 2mg powder for solution for infusion vials  
35 Ramucirumab 100mg/10ml solution for infusion vials  
36 Cyramza 100mg/10ml concentrate for solution for infusion vials (Eli Lilly and Company Ltd)  
37 Cyramza 500mg/50ml concentrate for solution for infusion vials (Eli Lilly and Company Ltd)  
38 Ramucirumab 500mg/50ml solution for infusion vials  
39 Razoxane 125mg tablets  
40 Stivarga 40mg tablets (Bayer Plc)  
41 Regorafenib 40mg tablets  
42 Jakavi 5mg tablets (Novartis Pharmaceuticals UK Ltd)  
43 Jakavi 15mg tablets (Novartis Pharmaceuticals UK Ltd)  
44 Ruxolitinib 15mg tablets  
45 Ruxolitinib 5mg tablets  
46 Jakavi 20mg tablets (Novartis Pharmaceuticals UK Ltd)  
47 Ruxolitinib 20mg tablets  
48 Nexavar 200mg tablets (Bayer Plc)  
49 Sorafenib 200mg tablets  
50 Sunitinib 50mg capsules

1 Sunitinib 25mg capsules  
2 Sunitinib 12.5mg capsules  
3 Sutent 50mg capsules (Pfizer Ltd)  
4 Sutent 12.5mg capsules (Pfizer Ltd)  
5 Sutent 25mg capsules (Pfizer Ltd)  
6 Imlygic 1million plaque forming units/1ml solution for injection vials (Amgen Ltd)  
7 Imlygic 100million plaque forming units/1ml solution for injection vials (Amgen Ltd)  
8 Talimogene laherparepvec 1million plaque forming units/1ml solution for injection vials  
9 Talimogene laherparepvec 100million plaque forming units/1ml solution for injection vials  
10 Foscan 20mg/5ml solution for injection vials (Biotech Pharma Ltd)  
11 Temoporfin 20mg/5ml solution for injection vials  
12 Temomedac 100mg capsules (medac UK)  
13 Temozolomide 250mg capsules  
14 Temodal 5mg capsules (Merck Sharp & Dohme Ltd)  
15 Temodal 180mg capsules (Merck Sharp & Dohme Ltd)  
16 Temozolomide 20mg capsules  
17 Temozolomide 180mg capsules  
18 Temozolomide 140mg capsules  
19 Temomedac 5mg capsules (medac UK)  
20 Temomedac 140mg capsules (medac UK)  
21 Temomedac 250mg capsules (medac UK)  
22 Temodal 20mg capsules (Merck Sharp & Dohme Ltd)  
23 Temodal 250mg capsules (Merck Sharp & Dohme Ltd)  
24 Temomedac 20mg capsules (medac UK)  
25 Temodal 140mg capsules (Merck Sharp & Dohme Ltd)  
26 Temomedac 180mg capsules (medac UK)  
27 Temodal 100mg capsules (Merck Sharp & Dohme Ltd)  
28 Temozolomide 5mg capsules  
29 Temozolomide 100mg capsules  
30 Temsirolimus 30mg/1.2ml solution for infusion vials and diluent  
31 Torisel 30mg/1.2ml concentrate for solution for infusion vials and diluent (Pfizer Ltd)  
32 Thiotepa 15mg powder for solution for infusion vials  
33 Tepadina 15mg powder for concentrate for solution for infusion vials (Adienne Pharma & Biotech)  
34 Thiotepa 100mg powder for solution for infusion vials  
35 Thiotepa 15mg powder for solution for injection vials  
36 Tepadina 100mg powder for concentrate for solution for infusion vials (Adienne Pharma & Biotech)  
37 Tioguanine 40mg tablets  
38 Lanvis 40mg tablets (Aspen Pharma Trading Ltd)  
39 Trifluridine 15mg / Tipiracil 6.14mg tablets  
40 Trifluridine 20mg / Tipiracil 8.19mg tablets  
41 Lonsurf 20mg/8.19mg tablets (Servier Laboratories Ltd)  
42 Lonsurf 15mg/6.14mg tablets (Servier Laboratories Ltd)  
43 Potactasol 1mg powder for concentrate for solution for infusion vials (Actavis UK Ltd)  
44 Topotecan 4mg powder for solution for infusion vials  
45 Topotecan 4mg/4ml solution for infusion vials  
46 Topotecan 1mg capsules  
47 Topotecan 250microgram capsules  
48 Hycamtin 1mg capsules (Novartis Pharmaceuticals UK Ltd)  
49 Hycamtin 1mg powder for concentrate for solution for infusion vials (Novartis Pharmaceuticals UK Ltd)  
50 Potactasol 4mg powder for concentrate for solution for infusion vials (Actavis UK Ltd)



1  
2 Topotecan 1mg powder for solution for infusion vials  
3 Hycamtin 4mg powder for concentrate for solution for infusion vials (Novartis Pharmaceuticals UK Ltd)  
4 Topotecan 1mg/1ml solution for infusion vials  
5 Hycamtin 0.25mg capsules (Novartis Pharmaceuticals UK Ltd)  
6 Mekinist 2mg tablets (Novartis Pharmaceuticals UK Ltd)  
7 Trametinib 500micrograms tablets  
8 Mekinist 0.5mg tablets (Novartis Pharmaceuticals UK Ltd)  
9 Trametinib 2mg tablets  
10  
11 Herceptin 150mg powder for solution for infusion vials (Roche Products Ltd)  
12 Trastuzumab 150mg powder for solution for infusion vials  
13 Trastuzumab emtansine 160mg powder for solution for infusion vials  
14 Kadcyca 160mg powder for concentrate for solution for infusion vials (Roche Products Ltd)  
15 Trastuzumab emtansine 100mg powder for solution for infusion vials  
16 Kadcyca 100mg powder for concentrate for solution for infusion vials (Roche Products Ltd)  
17 Treosulfan 5g powder for solution for injection vials  
18 Treosulfan 250mg capsules  
19 Treosulfan 1g powder for solution for injection vials  
20 Vesanoind 10mg capsules (Intrapharm Laboratories Ltd)  
21 Tretinoin 10mg capsules  
22 Vandetanib 100mg tablets  
23 Caprelsa 300mg tablets (Genzyme Therapeutics Ltd)  
24 Caprelsa 100mg tablets (Genzyme Therapeutics Ltd)  
25 Vandetanib 300mg tablets  
26 Vemurafenib 240mg tablets  
27 Zelboraf 240mg tablets (Roche Products Ltd)  
28 Venetoclax 100mg tablets  
29 Venclyxto 50mg tablets (AbbVie Ltd)  
30 Venetoclax 10mg tablets  
31 Venetoclax 50mg tablets  
32 Venclyxto 10mg tablets (AbbVie Ltd)  
33 Venclyxto 100mg tablets (AbbVie Ltd)  
34 Velbe 10mg powder for solution for injection vials (Eli Lilly and Company Ltd)  
35 Vincristine 5mg/5ml solution for injection vials  
36 Vincristine 1mg/1ml solution for injection vials  
37 Vincristine 2mg/2ml solution for injection vials  
38 Oncovin 1mg/1ml solution for injection vials (Eli Lilly and Company Ltd)  
39 Vindesine 5mg powder for solution for injection vials  
40 Eldisine 5mg powder for solution for injection vials (Thornton & Ross Ltd)  
41 Vinorelbine 50mg/5ml solution for infusion vials  
42 Vinorelbine 10mg/1ml solution for infusion vials  
43 Navelbine 80mg capsules (Pierre Fabre Ltd)  
44 Vinorelbine 30mg capsules  
45 Vinorelbine 20mg capsules  
46 Navelbine 50mg/5ml concentrate for solution for infusion vials (Pierre Fabre Ltd)  
47 Navelbine 30mg capsules (Pierre Fabre Ltd)  
48 Vinorelbine 80mg capsules  
49 Navelbine 20mg capsules (Pierre Fabre Ltd)  
50 Navelbine 10mg/1ml concentrate for solution for infusion vials (Pierre Fabre Ltd)  
51 Vismodegib 150mg capsules  
52 Erivedge 150mg capsules (Roche Products Ltd)

1  
2 Erivedge 150mg capsules (Roche Products Ltd)  
3  
4  
5  
6  
7  
8  
9  
10  
11  
12  
13  
14  
15  
16  
17  
18  
19  
20  
21  
22  
23  
24  
25  
26  
27  
28  
29  
30  
31  
32  
33  
34  
35  
36  
37  
38  
39  
40  
41  
42  
43  
44  
45  
46  
47  
48  
49  
50  
51  
52  
53  
54  
55  
56  
57  
58  
59  
60

For peer review only

1  
2  
3  
4  
5  
6  
7  
8  
9  
10  
11  
12  
13  
14  
15  
16  
17  
18  
19  
20  
21  
22  
23  
24  
25  
26  
27  
28  
29  
30  
31  
32  
33  
34  
35  
36  
37  
38  
39  
40  
41  
42  
43  
44  
45  
46  
47  
48  
49  
50  
51  
52  
53  
54  
55  
56  
57  
58  
59  
60

For peer review only

1  
2  
3  
4  
5  
6  
7  
8  
9  
10  
11  
12  
13  
14  
15  
16  
17  
18  
19  
20  
21  
22  
23  
24  
25  
26  
27  
28  
29  
30  
31  
32  
33  
34  
35  
36  
37  
38  
39  
40  
41  
42  
43  
44  
45  
46  
47  
48  
49  
50  
51  
52  
53  
54  
55  
56  
57  
58  
59  
60

For peer review only

1  
2  
3  
4  
5  
6  
7  
8  
9  
10  
11  
12  
13  
14  
15  
16  
17  
18  
19  
20  
21  
22  
23  
24  
25  
26  
27  
28  
29  
30  
31  
32  
33  
34  
35  
36  
37  
38  
39  
40  
41  
42  
43  
44  
45  
46  
47  
48  
49  
50  
51  
52  
53  
54  
55  
56  
57  
58  
59  
60

For peer review only

1  
2  
3  
4  
5  
6  
7  
8  
9  
10  
11  
12  
13  
14  
15  
16  
17  
18  
19  
20  
21  
22  
23  
24  
25  
26  
27  
28  
29  
30  
31  
32  
33  
34  
35  
36  
37  
38  
39  
40  
41  
42  
43  
44  
45  
46  
47  
48  
49  
50  
51  
52  
53  
54  
55  
56  
57  
58  
59  
60

For peer review only

1  
2  
3  
4  
5  
6  
7  
8  
9  
10  
11  
12  
13  
14  
15  
16  
17  
18  
19  
20  
21  
22  
23  
24  
25  
26  
27  
28  
29  
30  
31  
32  
33  
34  
35  
36  
37  
38  
39  
40  
41  
42  
43  
44  
45  
46  
47  
48  
49  
50  
51  
52  
53  
54  
55  
56  
57  
58  
59  
60

d)  
d)

For peer review only

1  
2  
3  
4  
5  
6  
7  
8  
9  
10  
11  
12  
13  
14  
15  
16  
17  
18  
19  
20  
21  
22  
23  
24  
25  
26  
27  
28  
29  
30  
31  
32  
33  
34  
35  
36  
37  
38  
39  
40  
41  
42  
43  
44  
45  
46  
47  
48  
49  
50  
51  
52  
53  
54  
55  
56  
57  
58  
59  
60

For peer review only



1  
2  
3  
4  
5  
6  
7  
8  
9  
10  
11  
12  
13  
14  
15  
16  
17  
18  
19  
20  
21  
22  
23  
24  
25  
26  
27  
28  
29  
30  
31  
32  
33  
34  
35  
36  
37  
38  
39  
40  
41  
42  
43  
44  
45  
46  
47  
48  
49  
50  
51  
52  
53  
54  
55  
56  
57  
58  
59  
60

For peer review only

1  
2  
3  
4  
5  
6  
7  
8  
9  
10  
11  
12  
13  
14  
15  
16  
17  
18  
19  
20  
21  
22  
23  
24  
25  
26  
27  
28  
29  
30  
31  
32  
33  
34  
35  
36  
37  
38  
39  
40  
41  
42  
43  
44  
45  
46  
47  
48  
49  
50  
51  
52  
53  
54  
55  
56  
57  
58  
59  
60

For peer review only

1  
2  
3  
4  
5  
6  
7  
8  
9  
10  
11  
12  
13  
14  
15  
16  
17  
18  
19  
20  
21  
22  
23  
24  
25  
26  
27  
28  
29  
30  
31  
32  
33  
34  
35  
36  
37  
38  
39  
40  
41  
42  
43  
44  
45  
46  
47  
48  
49  
50  
51  
52  
53  
54  
55  
56  
57  
58  
59  
60

For peer review only

1  
2  
3  
4  
5  
6  
7  
8  
9  
10  
11  
12  
13  
14  
15  
16  
17  
18  
19  
20  
21  
22  
23  
24  
25  
26  
27  
28  
29  
30  
31  
32  
33  
34  
35  
36  
37  
38  
39  
40  
41  
42  
43  
44  
45  
46  
47  
48  
49  
50  
51  
52  
53  
54  
55  
56  
57  
58  
59  
60

For peer review only

1  
2  
3  
4  
5  
6  
7  
8  
9  
10  
11  
12  
13  
14  
15  
16  
17  
18  
19  
20  
21  
22  
23  
24  
25  
26  
27  
28  
29  
30  
31  
32  
33  
34  
35  
36  
37  
38  
39  
40  
41  
42  
43  
44  
45  
46  
47  
48  
49  
50  
51  
52  
53  
54  
55  
56  
57  
58  
59  
60

For peer review only

1  
2  
3  
4  
5  
6  
7  
8  
9  
10  
11  
12  
13  
14  
15  
16  
17  
18  
19  
20  
21  
22  
23  
24  
25  
26  
27  
28  
29  
30  
31  
32  
33  
34  
35  
36  
37  
38  
39  
40  
41  
42  
43  
44  
45  
46  
47  
48  
49  
50  
51  
52  
53  
54  
55  
56  
57  
58  
59  
60

For peer review only

|    |                  |
|----|------------------|
| 1  |                  |
| 2  | Medcodeid        |
| 3  | 103777013        |
| 4  | 117168016        |
| 5  | 270232016        |
| 6  | 270616014        |
| 7  | 272325018        |
| 8  | 272389014        |
| 9  | 324973015        |
| 10 | 324974014        |
| 11 | 324975010        |
| 12 | 348547019        |
| 13 | 348550016        |
| 14 | 354610013        |
| 15 | 354613010        |
| 16 | 354616019        |
| 17 | 354621016        |
| 18 | 354628010        |
| 19 | 413415016        |
| 20 | 474471011        |
| 21 | 855601000006117  |
| 22 | 864761000006115  |
| 23 | 988961000006115  |
| 24 | 1711491000006119 |
| 25 | 1711511000006113 |
| 26 | 2189151000000117 |
| 27 | 2191221000000118 |
| 28 | 2197961000000113 |
| 29 | 1620531000006113 |
| 30 | 270768010        |
| 31 | 270777015        |
| 32 | 272326017        |
| 33 | 272327014        |
| 34 | 31211000006119   |
| 35 | 177251000006119  |
| 36 | 225661000006111  |
| 37 | 380061000000118  |
| 38 | 478131000006115  |
| 39 | 1905531000006112 |
| 40 | 859491000006112  |
| 41 | 900121000006113  |
| 42 | 1227663018       |
| 43 | 3527364013       |
| 44 | 3647071000006110 |
| 45 | 5039311000006114 |
| 46 | 5096171000006118 |
| 47 | 4542501000006119 |
| 48 | 3532180010       |
| 49 | 4663311000006116 |
| 50 | 2786011000006112 |
| 51 | 5340221000006117 |

For peer review only

1 4669451000006113  
2 3647061000006115  
3 12458801000006116  
4 4542461000006119  
5 4542691000006113  
6 3022121000006117  
7 7688001000006116  
8 4668981000006117  
9 2786021000006116  
10 3647051000006117  
11 4663811000006112  
12 3930661000006110  
13 4410641000006115  
14 4668961000006110  
15 7104131000006119  
16 5039331000006115  
17 2786001000006114  
18 4661791000006112  
19 4663791000006113  
20 864951000006119  
21 2560511000006119  
22 3786771000006114  
23 7237331000006116  
24 7237321000006119  
25 7316561000006118  
26 2618391000006114  
27 9935651000006116  
28 7279701000006119  
29 3346301000006113  
30 6948351000006111  
31 7838631000006116  
32 8030371000006119  
33 8453111000006110  
34 11910651000006112  
35 3653831000006114  
36 5161091000006119  
37 5096231000006110  
38 7237731000006117  
39 7139341000006119  
40 7254711000006117  
41 7985891000006113  
42 2666681000006118  
43 5087211000006119  
44 7791461000006114  
45 5057551000006110  
46 7351231000006114  
47 2641011000006119  
48 2641021000006110  
49 7766401000006118  
50 5039351000006110

For peer review only



1  
2 6018741000006111  
3 7385581000006116  
4 3636952011  
5 7710041000006114  
6 7475631000006115  
7 7986241000006112  
8 7150611000006118  
9 7566431000006113  
10 8335521000006117  
11 7791471000006119  
12 8453081000006116  
13 7100591000006115  
14 7710031000006116  
15 5039341000006113  
16 5157601000006116  
17 3534658012  
18 5039371000006117  
19 7170221000006110  
20 7838621000006119  
21 7566411000006119  
22 8115451000006112  
23 2868911000006114  
24 3598901000006118  
25 3786781000006112  
26 5959291000006115  
27 7383621000006115  
28 6932441000006115  
29 7507901000006114  
30 8268201000006117  
31 3527360016  
32 3033691000006115  
33 3670311000006119  
34 3915911000006117  
35 5096031000006117  
36 7785581000006115  
37 7507891000006110  
38 7838611000006110  
39 7566391000006119  
40 2949531000006115  
41 6948341000006114  
42 7189591000006110  
43 8325471000006118  
44 12458821000006114  
45 8117811000006119  
46 8348931000006116  
47 2447021000000110  
48 5087221000006110  
49 5057581000006119  
50 5096241000006117  
51 7103511000006119

For peer review only

1 7184551000006117  
2 2660021000006113  
3 5039361000006112  
4 5096051000006112  
5 3527362012  
6 8453711000006114  
7 12019461000006111  
8 7133421000006117  
9 3534651018  
10 4218231000006113  
11 4745181000006113  
12 5057571000006117  
13 7150631000006112  
14 7791441000006110  
15 8293001000006116  
16 7080931000006116  
17 7148541000006115  
18 2666671000006116  
19 3653841000006116  
20 90511000006115  
21 1549841000006116  
22 460649019  
23 461518012  
24 7986201000006110  
25 7752391000006113  
26 4323211000006112  
27 8325851000006114  
28 4319871000006111  
29 8325771000006113  
30 2868901000006111  
31 5161121000006115  
32 2660011000006117  
33 12031651000006118  
34 8284621000006118  
35 3825411000006114  
36 7475621000006118  
37 8450901000006118  
38 6718281000006112  
39 3973131000006117  
40 4779991000006112  
41 7714921000006112  
42 7181301000006112  
43 5057561000006112  
44 5161131000006117  
45 3825401000006111  
46 5980831000006116  
47 7385571000006119  
48 7298951000006115  
49 8313221000006113  
50 8325881000006118

For peer review only

1  
2 3455171000006118  
3 460955014  
4 4663831000006118  
5 4661761000006116  
6 7688541000006114  
7  
8 460645013  
9 754061000006111  
10 460643018  
11 1227661016  
12 384481000006118  
13 42151000006116  
14 270234015  
15 270618010  
16 1713291000006119  
17 1713331000006114  
18 2676200013  
19 354623018  
20 354627017  
21 422992018  
22 324971018  
23 270615013  
24 501594013  
25 7150641000006119  
26 8321131000006112  
27 7767241000006119  
28 7786611000006116  
29 5161291000006110  
30 5059341000006114  
31 7167121000006113  
32 7212371000006110  
33 7167141000006118  
34 7190521000006119  
35 7688081000006113  
36 5056471000006118  
37 11910741000006116  
38 380101000000116  
39 822591000006117  
40 6932431000006113  
41 8321141000006119  
42 7613121000006116  
43 12019471000006116  
44 6024591000006114  
45 5094171000006114  
46 7150621000006114  
47 8327141000006110  
48 7351241000006116  
49 5340201000006110  
50 3534653015  
51 933321000006111  
52 5096191000006117

For peer review only

1 4410651000006118  
2 4663841000006111  
3 3023061000006115  
4 3023081000006113  
5 5486891000006118  
6 460650019  
7 42161000006119  
8 268099017  
9 268100013  
10 270767017  
11 2209021000000112  
12 2234621000000111  
13 7766381000006118  
14 354612017  
15 270621012  
16 30458014  
17 2160027017  
18 403103015  
19 7484221000006112  
20 3973121000006115  
21 5161281000006112  
22 7150601000006116  
23 4319661000006117  
24 6585661000006112  
25 7767231000006112  
26 362091000000110  
27 460651015  
28 3636384014  
29 2890701000006112  
30 8325791000006114  
31 6933861000006111  
32 4319821000006110  
33 6316361000006112  
34 7167181000006112  
35 5053751000006110  
36 7566421000006110  
37 7767221000006114  
38 7565141000006116  
39 8348921000006119  
40 7167131000006111  
41 7569841000006114  
42 7238481000006111  
43 7710051000006111  
44 5599451000006111  
45 7385561000006114  
46 4661751000006118  
47 4668951000006113  
48 4669011000006116  
49 7080381000006116  
50 6933851000006114

For peer review only

1  
2 4668971000006115  
3 3485411000006113  
4 3022131000006119  
5 424791000006110  
6 500371000006119  
7 500401000006116  
8 1550021000006110  
9 324977019  
10 55971000006117  
11 90461000006118  
12 270233014  
13 2209101000000119  
14 2234541000000115  
15 906351000006116  
16 272320011  
17 354617011  
18 8335251000006112  
19 2560521000006110  
20 5096271000006113  
21 7168651000006111  
22 7171231000006119  
23 8284921000006111  
24 7279711000006116  
25 7985971000006118  
26 5647621000006110  
27 177341000006111  
28 7791451000006112  
29 8115511000006112  
30 8325761000006118  
31 8325871000006116  
32 5096281000006111  
33 3455181000006115  
34 8325481000006115  
35 8451601000006117  
36 5538541000006110  
37 12458511000006115  
38 5647611000006119  
39 7254721000006113  
40 460644012  
41 4323341000006116  
42 90471000006113  
43 372621000000114  
44 7496071000006114  
45 7139351000006117  
46 7214301000006113  
47 12719481000006116  
48 4542701000006113  
49 3647031000006112  
50 5043991000006117  
51 4663821000006116

For peer review only

1  
2 5043981000006115  
3 4669051000006115  
4 8258171000006110  
5 3022141000006112  
6 7688041000006119  
7 3022111000006113  
8 7091541000006113  
9 478111000006114  
10 818821000006110  
11 376141000000113  
12 90421000006112  
13 2198001000000111  
14 2198141000000110  
15 1800881000000119  
16 1709421000006118  
17 864281000006116  
18 225671000006116  
19 2160021016  
20 73655011  
21 270612011  
22 270614012  
23 270766014  
24 324970017  
25 324976011  
26 353974015  
27 354624012  
28 354631011  
29 3790671000006119  
30 2626431000006112  
31 7090481000006112  
32 12031641000006115  
33 5980821000006119  
34 7132471000006114  
35 7766371000006116  
36 11909781000006115  
37 11913051000006114  
38 2937111000006111  
39 3915921000006113  
40 7238471000006113  
41 8090361000006115  
42 5593651000006110  
43 3516351000006115  
44 7791431000006117  
45 8325861000006111  
46 3737491000006113  
47 8325781000006111  
48 7209391000006119  
49 3534659016  
50 2743241000000110  
51 8325891000006115  
52  
53  
54  
55  
56  
57  
58  
59  
60

For peer review only

1  
2 5161081000006117  
3 3260851000006117  
4 11913041000006112  
5 8335261000006114  
6 7133411000006113  
7 7348311000006117  
8 7766391000006115  
9 7080921000006119  
10 5044001000006114  
11 5157591000006112  
12 7569831000006116  
13 7932051000006112  
14 3292751000006114  
15 12719251000006111  
16 90611000006119  
17 399381000000115  
18 3022151000006114  
19 3515071000006117  
20 4663371000006113  
21 3647021000006114  
22 8325571000006119  
23 3023071000006110  
24 3532181014  
25 5096211000006116  
26 4661781000006114  
27 7104121000006117  
28 739931000006118  
29 270617017  
30 270770018  
31 270776012  
32 270778013  
33 1834341000006111  
34 861571000006118  
35 366671000000118  
36 282927013  
37 354615015  
38 354618018  
39 354619014  
40 7212381000006113  
41 8293011000006118  
42 8321121000006114  
43 7986531000006116  
44 5087201000006117  
45 270769019  
46 4542541000006117  
47 251924010  
48 4542681000006110  
49 251930010  
50 251923016  
51 4542521000006112

For peer review only

1 251929017  
2  
3 4542661000006117  
4 2674490015  
5 2674491016  
6 8047851000006119  
7  
8 8294221000006119  
9 5611161000006112  
10 5063131000006112  
11 5063121000006114  
12 361931000000119  
13 491071000000110  
14 7504171000006112  
15 6240891000006113  
16 8087441000006110  
17 7644221000006118  
18 7644211000006114  
19 3448711000006119  
20 7265981000006117  
21 5063031000006111  
22 5063081000006112  
23 5063041000006118  
24 5065771000006112  
25 2878601000006113  
26 3454841000006117  
27 5065791000006113  
28 5065801000006114  
29 5063101000006116  
30 5063051000006116  
31 2674363011  
32 2674539019  
33 746211000000116  
34 12759381000006119  
35 8038051000006113  
36 277293014  
37 2674362018  
38 12725251000006119  
39 277294015  
40 386791000000112  
41 365791000000118  
42 2674322017  
43 277291011  
44 380521000000119  
45 7046211000006111  
46 500101000006110  
47 5611121000006118  
48 415107013  
49  
50  
51  
52  
53  
54  
55  
56  
57  
58  
59  
60

For peer review only



1  
2 Term  
3 Transplantation of pancreas  
4 Renal transplant  
5 Replacement of previous liver transplant  
6 Renewal of transplanted pancreatic tissue  
7 Cadaveric renal transplant  
8 Exploration of renal transplant  
9 Kidney transplant failure and rejection  
10 Heart transplant failure and rejection  
11 Heart-lung transplant failure and rejection  
12 Single lung transplant  
13 Double lung transplant  
14 Renal transplant rejection  
15 Very mild acute rejection of renal transplant  
16 Acute rejection of renal transplant - grade I  
17 Chronic transplant nephropathy  
18 Acute-on-chronic rejection of renal transplant  
19 Unexplained episode of renal transplant dysfunction  
20 Transplantation of islets of Langerhans  
21 Transplant biopsy  
22 Pancreas transplant  
23 Renal transplant rejected  
24 Post-transplant bronchiolitis obliterans syndrome  
25 Lung transplant evaluation  
26 Urological complication of renal transplant  
27 Vascular complication of renal transplant  
28 Rupture of artery of transplanted kidney  
29 Paediatric transplantation surgery  
30 Transplantation of heart and lung NOS  
31 Other specified other transplantation of heart  
32 Other specified transplantation of kidney  
33 Transplantation of kidney NOS  
34 Orthotopic transplantation of liver  
35 Renal transplant with complication  
36 Piggy back liver transplant  
37 Interventions associated with transplantation of kidney NOS  
38 Allotransplantation of kidney from cadaver  
39 Excision of rejected transplanted kidney  
40 Corneal transplant  
41 Renal transplant rejected  
42 [V]Pancreas transplanted  
43 Transplanted liver present  
44 Tx - Kidney transplantation  
45 SLTx - Single lung transplant  
46 Mild chronic transplant nephropathy  
47 History of renal transplant  
48 Liver transplant recipient  
49 Whole organ pancreatic transplant  
50 Hepatic transplantation  
51 PTLN - Post-transplant lymphoproliferative disorder

1 Exploration of kidney transplant  
2 Kidney transplant  
3 [V]Liver transplanted  
4 History of organ transplant  
5 History of being lung transplant recipient  
6 Heart transplant  
7 Allotransplantation of kidney with DBD (donation after brain stem death)  
8 Renal autotransplantation or reimplantation of kidney  
9 LTx - Liver transplant  
10 Tx - Renal transplantation  
11 Xenotransplant of heart  
12 Transplant of lung  
13 Islet cell transplant  
14 Autotransplant kidney  
15 Disorder affecting transplant  
16 DLTx - Double lung transplant  
17 Tx - Liver transplantation  
18 Piggy-back liver transplant  
19 Allotransplant of heart and lung  
20 Heart transplant  
21 Structure of transplanted liver  
22 Anaesthesia for corneal transplant  
23 MR angiography of transplanted kidney  
24 Magnetic resonance angiography of transplanted kidney  
25 Monomorphic posttransplant lymphoproliferative disorder  
26 Immunosuppressive therapy for transplant  
27 Awaiting transplantation of lung  
28 Radionuclide imaging of transplanted kidney  
29 Renal homotransplantation excluding donor and recipient nephrectomy  
30 Renal transplant venogram  
31 Infectious mononucleosis-like post-transplant lymphoproliferative disorder  
32 Aftercare for liver transplant done  
33 Emergency hospital admission to cardiothoracic transplantation surgery service  
34 [V]Kidney transplanted  
35 Structure of transplanted kidney  
36 Ultrasound scan of transplant liver  
37 Failed renal transplant  
38 Specimen from transplanted lung obtained by excision  
39 Rejection of pancreas transplant  
40 Percutaneous transhepatic transplantation of pancreatic islet cell using fluoroscopic guidance  
41 Transplantation of kidney and pancreas  
42 Transplanted cornea  
43 Liver transplant rejection  
44 Entire transplanted pancreatic islets  
45 Cardiac transplant disorder  
46 Fluoroscopic venography of transplanted pancreas using contrast  
47 Anaesthesia for heart/lung transplant  
48 Anesthesia for heart/lung transplant  
49 Retrograde insertion of ureteric stent into ureter of transplanted kidney using fluoroscopic guidance  
50 Double lung transplant en bloc

1 Lung transplant rejection  
2 Post transplant lymphoproliferative disorder  
3 Bronchiolitis obliterans syndrome due to and after lung transplantation  
4 Transplant renal artery stenosis  
5 Disorder of heart muscle associated with rejection of cardiac transplant  
6 Laparoscopic biopsy of transplanted pancreas  
7 Doppler ultrasonography (US) of transplanted kidney  
8 Liver transplant recipient  
9 History of heart-lung transplant recipient  
10 Entire transplanted islets of Langerhans  
11 Emergency hospital admission to transplantation surgery service  
12 Disorder of transplanted heart  
13 Structure of renal artery of transplanted kidney  
14 Double lung transplant as a block  
15 Renal transplant venogram  
16 Transplanted heart-lung present  
17 BSSLTx - Bilateral sequential single lung transplant  
18 Chronic rejection of liver transplant  
19 Reactive plasmacytic hyperplasia post-transplant lymphoproliferative disorder  
20 Lung transplant recipient  
21 Transplanted lung resection sample  
22 Anesthesia for renal transplant  
23 Heterotransplant of pancreas  
24 Anesthesia for corneal transplant  
25 Discharge from transplant surgery service  
26 Revision of transplantation of heart  
27 Renal transplant angiogram  
28 History of pancreas transplant  
29 Allotransplantation of lobe of lung from live donor  
30 Transplanted kidney present  
31 Complication of transplanted liver  
32 Homotransplant of pancreas  
33 Anaesthesia for heart transplant  
34 Primary non-function of renal transplant  
35 Kidney transplant recipient  
36 History of transplantation of pancreas  
37 Early post-transplant lymphoproliferative disorder  
38 Cornea transplant recipient  
39 Liver transplant without recipient hepatectomy  
40 Fluoroscopic venography of renal transplant  
41 Hyperacute rejection of pancreas transplant  
42 Fluoroscopic angiography of transplanted liver  
43 [V]Lung transplanted  
44 Renal transplant recipient  
45 Fluoroscopy guided retrograde insertion of stent into ureter of transplanted kidney  
46 Cardiothoracic transplantation care plan  
47 Liver transplant failure  
48 Cardiac transplant failure  
49 Perfusion injury of renal transplant  
50 Disorder related to renal transplantation

1 Accelerated rejection of pancreas transplant  
2 Transplanted lung  
3 Bilateral sequential single lung transplant  
4 Hyperacute rejection of renal transplant  
5 Transplanted lung present  
6 Emergency hospital admission to paediatric transplantation surgery service  
7 Fluoroscopy guided removal of nephrostomy tube from transplanted kidney  
8 Acute rejection of lung transplant  
9 Heart transplant recipient  
10 Kidney transplant evaluation  
11 Entire transplanted lung  
12 Cardiac transplant rejection  
13 Doppler ultrasound scan of transplanted kidney  
14 Structure of transplanted islets of Langerhans  
15 Living donor liver transplantation  
16 Disorder related to lung transplantation  
17 Chronic rejection of cardiac transplant  
18 Structure of transplanted cornea  
19 Transplanted kidney  
20 LTx - Lung transplant  
21 Allotransplantation of kidney from non-beating heart cadaver  
22 Transplanted cornea present  
23 Transplant present  
24 Percutaneous needle biopsy of transplanted pancreas  
25 Heart-lung transplant recipient  
26 Spinal cord transplantation  
27 CT of transplanted liver  
28 Cardiovascular system transplantation  
29 Ultrasound guided biopsy of transplanted liver  
30 Anaesthesia for renal transplant  
31 US scan of transplant pancreas  
32 Structure of transplanted lung  
33 Allotransplantation of right kidney  
34 Allogeneic transplantation of pancreatic islet cells  
35 Transplanted heart  
36 Disorder of myocardium associated with rejection of cardiac transplant  
37 Pretransplant evaluation of liver recipient  
38 Autotransplantation of heart  
39 Anesthesia for liver transplant  
40 Entire transplanted heart  
41 Chronic kidney disease stage 5 with transplant  
42 Acute rejection of pancreas transplant  
43 Complication of transplanted heart  
44 Ultrasound scan of transplant pancreas  
45 Structure of transplanted heart  
46 Heart transplant biopsy  
47 Post transplant lymphoproliferative disorder  
48 Arteriosclerosis of coronary artery bypass graft of transplanted heart  
49 Cardiothoracic transplantation service  
50 Fluoroscopy guided percutaneous transjugular biopsy of transplanted liver

1 Disorder of transplanted kidney  
2 [V]Heart and lungs transplant status  
3 Auxiliary heart transplant  
4 Orthotopic transplantation of liver  
5 Transplantation of kidney regime  
6 [V]Heart transplanted  
7 Kidney transplant with complication  
8 [V]Transplanted organ or tissue  
9 [V]Transplanted organ  
10 [X]Failure & rejection of other transplanted organ & tissue  
11 Organ transplant with complication  
12 Transplantation of liver NOS  
13 Transplantation of pancreas NOS  
14 Cardiothoracic transplantation  
15 Transplantation surgery  
16 Orthotopic transplantation of whole liver  
17 Chronic rejection of renal transplant - grade 1  
18 Chronic rejection of renal transplant - grade III  
19 Excision of rejected transplanted kidney  
20 Transplanted organ rejection  
21 Transplantation of tail of pancreas  
22 Transplantation of kidney  
23 Doppler ultrasound of transplanted kidney  
24 Ultrasound guided insertion of nephrostomy tube into transplanted kidney  
25 Doppler ultrasound of transplanted liver  
26 Structure of transplanted pancreas  
27 Ultrasound scan of transplant kidney  
28 Transplant renal vein thrombosis  
29 Hyperacute rejection of liver transplant  
30 Specimen from transplanted kidney obtained by biopsy  
31 Hyperacute rejection of lung transplant  
32 Chronic rejection of pancreas transplant  
33 Doppler ultrasonography of blood vessel of organ transplant  
34 Accelerated coronary artery disease in transplanted heart  
35 [V]Liver transplanted  
36 Examination of recipient after kidney transplant  
37 Heterotopic liver transplant  
38 Fluoroscopic angiography of renal transplant  
39 Fluoroscopy guided insertion of nephrostomy tube into transplanted kidney  
40 Recurrent post-transplant renal disease  
41 Removal of nephrostomy tube from transplanted kidney using fluoroscopic guidance  
42 Solid organ transplant  
43 End stage renal failure with renal transplant  
44 Doppler ultrasonography of transplanted kidney  
45 Radioisotope hepatobiliary function study with stimulation post transplant  
46 Fluoroscopic venogram of transplanted pancreas using contrast  
47 Post-transplant neoplasia  
48 Transplanted heart present  
49 Corneal transplant  
50 Moderate chronic transplant nephropathy

1 Transplantation of islet cells  
2 Piggy-back heart transplant  
3 Heart-lung transplant with recipient cardiectomy-pneumonectomy  
4 Heart and lung transplant  
5 Removal of transplanted kidney  
6 [V]Lung transplanted  
7 Organ transplant with complication  
8 Other specified transplantation of lung  
9 Transplantation of lung NOS  
10 Other specified transplantation of heart and lung  
11 Aneurysm of vein of transplanted kidney  
12 Thrombosis of vein of transplanted kidney  
13 Antegrade insertion of ureteric stent into ureter of transplanted kidney using fluoroscopic guidance  
14 Accelerated rejection of renal transplant  
15 Excision of transplanted pancreas  
16 Transplantation of liver  
17 Transplantation surgery  
18 Transplanted organ failure  
19 Normal renal function of transplanted kidney  
20 Anaesthesia for liver transplant  
21 US scan of transplant kidney  
22 US doppler scan of transplanted kidney  
23 Bronchus transplantation  
24 Post-transplant lymphoproliferative disorder  
25 Doppler ultrasound scan of transplanted liver  
26 Transplantation of single lobe of lung  
27 Transplanted liver present  
28 Polymorphic lymphoproliferative disorder following transplant  
29 Transplanted organ  
30 MRI angiogram of transplanted liver  
31 Fluoroscopy and angioplasty of renal transplant  
32 Pleura transplantation  
33 Entire transplanted cornea  
34 Accelerated rejection of liver transplant  
35 Post-lung transplantation bronchiectasis  
36 Heart transplant recipient  
37 Doppler ultrasonography of transplanted liver  
38 Doppler ultrasound of transplant liver  
39 Fluoroscopy guided antegrade insertion of stent into ureter of transplanted kidney  
40 Hyperacute rejection of cardiac transplant  
41 Vesicoureteric reflux after renal transplant  
42 Ultrasonography guided biopsy of transplanted kidney  
43 Renal artery stenosis of transplanted kidney  
44 Part organ pancreatic transplant  
45 Post transplant lymphoproliferative disorder  
46 Orthotopic liver transplant  
47 Autotransplantation of kidney  
48 Live donor renal allotransplant  
49 Hypertension associated with transplantation  
50 Fluoroscopic angioplasty of renal transplant

1 Renal autotransplantation  
2 Corneal transplant  
3 CTx - Cardiac transplant  
4 [X]Renal tubulo-interstitial disorders/transplant rejection  
5 Autotransplant of kidney  
6 Auxillary liver transplant  
7 OS interventions associated with transplantation of kidney  
8 Transplanted organ complication NOS  
9 Xenotransplantation of heart  
10 Transplantation of kidney from cadaver  
11 Other specified transplantation of liver  
12 Aneurysm of artery of transplanted kidney  
13 Thrombosis of artery of transplanted kidney  
14 [RFC] Renal transplant  
15 Allotransplantation of kidney from live donor  
16 Acute rejection of renal transplant - grade II  
17 Ultrasonography of transplanted kidney with contrast  
18 Transplanted liver  
19 Transplant glomerulopathy  
20 Acute rejection of cardiac transplant  
21 Chronic rejection of lung transplant  
22 Autologous transplantation of pancreatic islet cells  
23 Radionuclide study of transplanted kidney  
24 Laparoscopic biopsy of transplanted kidney  
25 Entire transplant kidney  
26 Renal tubulo-interstitial disorders in transplant rejection  
27 Entire transplanted pancreas  
28 Lung transplant biopsy sample  
29 Ultrasonography guided biopsy of transplanted liver  
30 CT guided biopsy of transplanted liver  
31 Transplant glomerulopathy - early form  
32 Complication of transplanted kidney  
33 Fluoroscopic angiogram of transplanted liver  
34 Fluoroscopy guided removal of nephrostomy tube from transplanted kidney  
35 Entire transplanted liver  
36 [V]Heart transplanted  
37 Entire transplanted kidney  
38 Fluoroscopy guided percutaneous transhepatic transplantation of pancreatic islet cell  
39 History of renal transplant  
40 Eye structure transplantation  
41 Live donor renal transplant  
42 Allotransplantation of kidney from beating heart cadaver  
43 Percutaneous thrombolysis of vein of transplanted pancreas using fluoroscopic guidance  
44 Accelerated rejection of lung transplant  
45 Tissue specimen from transplanted kidney  
46 Other transplantation of heart  
47 History of lung transplant  
48 Kidney transplantation  
49 Cadaveric heart transplant  
50 Heterotopic allotransplant of heart

1 Allotransplant of heart  
2 Cadaver renal allotransplant  
3 Bronchiolitis obliterans syndrome after lung transplantation  
4 HtTx - Heart transplant  
5 Allotransplantation of kidney with DCD (donation after cardiac death)  
6 Heart transplantation  
7 Post-transplantation of kidney examination of recipient  
8 Allotransplantation of heart and lung  
9 Heart transplant with complication  
10 Orthotopic transplantation of liver NEC  
11 Transplantation of heart and lung  
12 Rupture of vein of transplanted kidney  
13 Stenosis of vein of transplanted kidney  
14 Post-transplant bronchiolitis obliterans syndrome  
15 Complication of transplanted lung  
16 Liver transplant  
17 Piggyback transplantation of heart  
18 Cardiothoracic transplantation  
19 Complication of transplanted lung  
20 Transplantation of pancreas and duodenum  
21 Transplantation of whole pancreas  
22 Revision of transplantation of heart and lung  
23 Transplant rejection  
24 Liver transplant failure and rejection  
25 Xenograft renal transplant  
26 Chronic rejection of renal transplant - grade II  
27 De novo transplant disease  
28 Complication of transplanted pancreas  
29 Transplantation of adrenal gland  
30 Hypertension secondary to kidney transplant  
31 Allotransplantation of left kidney  
32 Transluminal right ventricular biopsy after heart transplant  
33 Accelerated rejection of cardiac transplant  
34 Fluoroscopy guided antegrade insertion of ureteric stent into ureter of transplanted kidney  
35 [V]Cornea transplanted  
36 [V]Transplanted organ or tissue  
37 Liver transplant with recipient hepatectomy  
38 Anesthesia for heart transplant  
39 Biopsy of transplanted kidney using ultrasound guidance  
40 History of islet cell transplant  
41 Pre-existing disease in renal transplant  
42 Autotransplant of lung  
43 Structure of transplanted pancreatic islets  
44 CT of transplanted liver with contrast  
45 Total pancreatectomy with transplantation  
46 Magnetic resonance angiography of transplanted liver  
47 Specimen from transplanted lung obtained by biopsy  
48 Heart-lung transplant recipient  
49 Transplant of kidney using robotic assistance  
50 MRI of transplanted liver



1 US scan of transplant liver  
2 Heart transplant with recipient cardiectomy  
3 [V]Transplanted organ  
4 Ultrasound scan of transplanted kidney with contrast  
5 Acute rejection of liver transplant  
6 Allotransplantation of islets of Langerhans  
7 Fluoroscopy guided retrograde insertion of ureteric stent into ureter of transplanted kidney  
8 Disorder related to cardiac transplantation  
9 Orthotopic allotransplant of heart  
10 Renal transplant arteriogram  
11 Post-renal transplant vesicoureteric reflux  
12 Entire renal artery of transplanted kidney  
13 Renal homotransplantation with unilateral recipient nephrectomy  
14 [X]Surgical operation with transplant of whole organ as the cause of abnormal reaction of the patie  
15 Transplanted organ complication  
16 Allotransplantation of kidney from cadaver NEC  
17 HTx - Heart transplant  
18 Pancreatic transplant  
19 Transplanted pancreas pancreatectomy  
20 Transplant of kidney  
21 Fluoroscopic angioplasty of transplanted liver  
22 HLTx - Heart lung transplant  
23 Cornea transplant recipient  
24 Severe chronic transplant nephropathy  
25 Auxiliary liver transplant  
26 Disorder affecting transplanted structure  
27 Liver transplant with complication  
28 Other specified transplantation of pancreas  
29 Allotransplantation of heart NEC  
30 Revision of transplantation of heart NEC  
31 Other transplantation of heart NOS  
32 Under regular review by lung transplant unit  
33 Lung transplant  
34 Interventions associated with transplantation of kidney  
35 Transplant immunosuppression  
36 Acute rejection of renal transplant  
37 Acute rejection of renal transplant - grade III  
38 Chronic rejection of renal transplant  
39 Renal transplant biopsy sample  
40 Live donor liver transplant  
41 Ultrasonography guided insertion of nephrostomy tube into transplanted kidney  
42 Coronary arteriosclerosis in native artery of transplanted heart  
43 Liver transplant disorder  
44 Transplantation of heart  
45 History of heart recipient  
46 H/O: heart recipient  
47 History of - lung recipient  
48 H/O: lung recipient  
49 H/O: kidney recipient  
50 History of - kidney recipient

1 H/O: liver recipient  
2 History of liver recipient  
3 Autologous peripheral blood stem cell transplant  
4 Allogeneic peripheral blood stem cell transplant  
5 History of peripheral stem cell transplant  
6 Limbal stem cell allograft transplantation  
7 Peripheral blood stem cell transplantation  
8 Hemopoietic stem cell transplant  
9 Haemopoietic stem cell transplant  
10 Limbal stem cell transplantation  
11 Syngeneic peripheral blood stem cell transplant  
12 Syngeneic peripheral blood stem cell transplantation  
13 Immune system transplantation  
14 Transplantation of stem cells  
15 Transplantation of autologous hematopoietic stem cell  
16 Transplantation of autologous haematopoietic stem cell  
17 Allogeneic bone marrow graft  
18 Grafting of bone marrow using allograft from unmatched unrelated donor  
19 Syngeneic bone marrow graft  
20 Allogeneic related bone marrow graft  
21 T-cell depleted allogeneic bone marrow graft  
22 Rejection of bone marrow graft  
23 Bone marrow graft  
24 Autologous bone marrow graft  
25 Failed bone marrow transplant engraftment  
26 Failure of bone marrow graft  
27 Allogeneic unrelated bone marrow graft  
28 Imperfect T-cell depleted allogeneic bone marrow graft  
29 Allograft of bone marrow from matched unrelated donor  
30 Graft of cord blood to bone marrow  
31 Allograft of bone marrow from unmatched unrelated donor  
32 Graft of bone marrow NOS  
33 Chronic graft versus host disease after transplantation of bone marrow  
34 Other specified graft of bone marrow  
35 Allograft of bone marrow from sibling donor  
36 Grafting of bone marrow NOS  
37 Graft of bone marrow NOS  
38 Other specified graft of cord blood to bone marrow  
39 Allograft of bone marrow from haploidentical donor  
40 Allograft of cord blood to bone marrow  
41 Allograft of bone marrow NEC  
42 Graft of cord blood to bone marrow NOS  
43 Grafting of cord blood to bone marrow  
44 Autograft of bone marrow  
45 PBSC - Peripheral blood stem cell graft  
46 Peripheral blood stem cell graft  
47  
48  
49  
50  
51  
52  
53  
54  
55  
56  
57  
58  
59  
60

1  
2  
3  
4  
5  
6  
7  
8  
9  
10  
11  
12  
13  
14  
15  
16  
17  
18  
19  
20  
21  
22  
23  
24  
25  
26  
27  
28  
29  
30  
31  
32  
33  
34  
35  
36  
37  
38  
39  
40  
41  
42  
43  
44  
45  
46  
47  
48  
49  
50  
51  
52  
53  
54  
55  
56  
57  
58  
59  
60

For peer review only

1  
2  
3  
4  
5  
6  
7  
8  
9  
10  
11  
12  
13  
14  
15  
16  
17  
18  
19  
20  
21  
22  
23  
24  
25  
26  
27  
28  
29  
30  
31  
32  
33  
34  
35  
36  
37  
38  
39  
40  
41  
42  
43  
44  
45  
46  
47  
48  
49  
50  
51  
52  
53  
54  
55  
56  
57  
58  
59  
60

For peer review only

ce

1  
2  
3  
4  
5  
6  
7  
8  
9  
10  
11  
12  
13  
14  
15  
16  
17  
18  
19  
20  
21  
22  
23  
24  
25  
26  
27  
28  
29  
30  
31  
32  
33  
34  
35  
36  
37  
38  
39  
40  
41  
42  
43  
44  
45  
46  
47  
48  
49  
50  
51  
52  
53  
54  
55  
56  
57  
58  
59  
60

For peer review only

1  
2  
3  
4  
5  
6  
7  
8  
9  
10  
11  
12  
13  
14  
15  
16  
17  
18  
19  
20  
21  
22  
23  
24  
25  
26  
27  
28  
29  
30  
31  
32  
33  
34  
35  
36  
37  
38  
39  
40  
41  
42  
43  
44  
45  
46  
47  
48  
49  
50  
51  
52  
53  
54  
55  
56  
57  
58  
59  
60

For peer review only

1  
2  
3  
4  
5  
6  
7  
8  
9  
10  
11  
12  
13  
14  
15  
16  
17  
18  
19  
20  
21  
22  
23  
24  
25  
26  
27  
28  
29  
30  
31  
32  
33  
34  
35  
36  
37  
38  
39  
40  
41  
42  
43  
44  
45  
46  
47  
48  
49  
50  
51  
52  
53  
54  
55  
56  
57  
58  
59  
60

For peer review only

1  
2  
3  
4  
5  
6  
7  
8  
9  
10  
11  
12  
13  
14  
15  
16  
17  
18  
19  
20  
21  
22  
23  
24  
25  
26  
27  
28  
29  
30  
31  
32  
33  
34  
35  
36  
37  
38  
39  
40  
41  
42  
43  
44  
45  
46  
47  
48  
49  
50  
51  
52  
53  
54  
55  
56  
57  
58  
59  
60

e

For peer review only



1  
2  
3  
4  
5  
6  
7  
8  
9  
10  
11  
12  
13  
14  
15  
16  
17  
18  
19  
20  
21  
22  
23  
24  
25  
26  
27  
28  
29  
30  
31  
32  
33  
34  
35  
36  
37  
38  
39  
40  
41  
42  
43  
44  
45  
46  
47  
48  
49  
50  
51  
52  
53  
54  
55  
56  
57  
58  
59  
60

For peer review only

1  
2  
3  
4  
5  
6  
7  
8  
9  
10  
11  
12  
13  
14  
15  
16  
17  
18  
19  
20  
21  
22  
23  
24  
25  
26  
27  
28  
29  
30  
31  
32  
33  
34  
35  
36  
37  
38  
39  
40  
41  
42  
43  
44  
45  
46  
47  
48  
49  
50  
51  
52  
53  
54  
55  
56  
57  
58  
59  
60

For peer review only

1  
2  
3  
4  
5  
6  
7  
8  
9  
10  
11  
12  
13  
14  
15  
16  
17  
18  
19  
20  
21  
22  
23  
24  
25  
26  
27  
28  
29  
30  
31  
32  
33  
34  
35  
36  
37  
38  
39  
40  
41  
42  
43  
44  
45  
46  
47  
48  
49  
50  
51  
52  
53  
54  
55  
56  
57  
58  
59  
60

ent

For peer review only

| ICD-10 code | Term                                              |
|-------------|---------------------------------------------------|
| Z94.0       | Kidney transplant status                          |
| Z94.1       | Heart transplant status                           |
| Z94.2       | Lung transplant status                            |
| Z94.3       | Heart and lungs transplant status                 |
| Z94.4       | Liver transplant status                           |
| Z94.6       | Bone transplant status                            |
| Z94.7       | Corneal transplant status                         |
| Z94.9       | Transplanted organ and tissue status, unspecified |
| Z94.82      | Intestine transplant status                       |
| Z94.83      | Pancreas transplant status                        |
| Z94.89      | Other transplanted organ and tissue status        |
| Z94.84      | Stem cell transplant status                       |
| Z94.81      | Bone marrow transplant status                     |

|    | OPCS code | Term                                                    |
|----|-----------|---------------------------------------------------------|
| 1  |           |                                                         |
| 2  |           |                                                         |
| 3  | K01.1     | Transplantation of heart and lung                       |
| 4  | K02.1     | Other transplantation of heart                          |
| 5  | G68.1     | Transplantation of ileum                                |
| 6  |           |                                                         |
| 7  | M01.4     | Transplantation of kidney                               |
| 8  | M01.5     | Transplantation of kidney                               |
| 9  | M01.3     | Transplantation of kidney                               |
| 10 | M01.2     | Transplantation of kidney                               |
| 11 | G26.1     | Transplantation of stomach                              |
| 12 |           |                                                         |
| 13 | B17.1     | Transplantation of thymus gland                         |
| 14 | M01.1     | Transplantation of kidney                               |
| 15 | E53.1     | Transplantation of lung                                 |
| 16 | M02.6     | Total excision of kidney                                |
| 17 | M02.7     | Total excision of kidney                                |
| 18 |           |                                                         |
| 19 | J55.3     | Total excision of pancreas                              |
| 20 | M08.4     | Other open operations on kidney                         |
| 21 | J01.2     | Transplantation of liver                                |
| 22 | K02.3     | Other transplantation of heart                          |
| 23 |           |                                                         |
| 24 | J01.1     | Transplantation of liver                                |
| 25 | J01.5     | Transplantation of liver                                |
| 26 | B17.8     | Transplantation of thymus gland                         |
| 27 | E53.8     | Transplantation of lung                                 |
| 28 | G26.8     | Transplantation of stomach                              |
| 29 |           |                                                         |
| 30 | G68.8     | Transplantation of ileum                                |
| 31 | J01.8     | Transplantation of liver                                |
| 32 | J54.8     | Transplantation of pancreas                             |
| 33 | K01.8     | Transplantation of heart and lung                       |
| 34 | K02.8     | Other transplantation of heart                          |
| 35 |           |                                                         |
| 36 | M01.8     | Transplantation of kidney                               |
| 37 | M17.8     | Interventions associated with transplantation of kidney |
| 38 | K02.4     | Other transplantation of heart                          |
| 39 | M17.4     | Interventions associated with transplantation of kidney |
| 40 | J54.5     | Transplantation of pancreas                             |
| 41 |           |                                                         |
| 42 | J01.3     | Transplantation of liver                                |
| 43 | K02.5     | Other transplantation of heart                          |
| 44 | K01.2     | Transplantation of heart and lung                       |
| 45 | K02.6     | Other transplantation of heart                          |
| 46 | E53.3     | Transplantation of lung                                 |
| 47 | E53.2     | Transplantation of lung                                 |
| 48 |           |                                                         |
| 49 | J54.4     | Transplantation of pancreas                             |
| 50 | J01.4     | Transplantation of liver                                |
| 51 | J54.1     | Transplantation of pancreas                             |
| 52 | J72.1     | Other operations on spleen                              |
| 53 |           |                                                         |
| 54 | J54.3     | Transplantation of pancreas                             |
| 55 | J54.2     | Transplantation of pancreas                             |
| 56 | B17.9     | Transplantation of thymus gland                         |
| 57 | E53.9     | Transplantation of lung                                 |
| 58 | G26.9     | Transplantation of stomach                              |
| 59 | G68.9     | Transplantation of ileum                                |
| 60 | J01.9     | Transplantation of liver                                |

|    |       |                                                         |
|----|-------|---------------------------------------------------------|
| 1  |       |                                                         |
| 2  | J54.9 | Transplantation of pancreas                             |
| 3  | K01.9 | Transplantation of heart and lung                       |
| 4  | K02.9 | Other transplantation of heart                          |
| 5  | M01.9 | Transplantation of kidney                               |
| 6  | M17.9 | Interventions associated with transplantation of kidney |
| 7  |       |                                                         |
| 8  | K02.2 | Other transplantation of heart                          |
| 9  | B17   | Transplantation of thymus gland                         |
| 10 | E53   | Transplantation of lung                                 |
| 11 | G26   | Transplantation of stomach                              |
| 12 | G68   | Transplantation of ileum                                |
| 13 | J01   | Transplantation of liver                                |
| 14 | J54   | Transplantation of pancreas                             |
| 15 | K01   | Transplantation of heart and lung                       |
| 16 | K02   | Other transplantation of heart                          |
| 17 | M01   | Transplantation of kidney                               |
| 18 | M17   | Interventions associated with transplantation of kidney |
| 19 |       |                                                         |
| 20 | W34   | Graft of bone marrow                                    |
| 21 | W34.1 | Graft of bone marrow                                    |
| 22 | W34.2 | Graft of bone marrow                                    |
| 23 | W34.3 | Graft of bone marrow                                    |
| 24 | W34.4 | Graft of bone marrow                                    |
| 25 | W34.5 | Graft of bone marrow                                    |
| 26 | W34.6 | Graft of bone marrow                                    |
| 27 | W34.8 | Graft of bone marrow                                    |
| 28 | W34.9 | Graft of bone marrow                                    |
| 29 | W99   | Graft of bone marrow                                    |
| 30 | W99.1 | Graft of bone marrow                                    |
| 31 | W99.8 | Graft of bone marrow                                    |
| 32 | W99.9 | Graft of bone marrow                                    |
| 33 | X33.4 | Other blood transfusion                                 |
| 34 | X33.5 | Other blood transfusion                                 |
| 35 | X33.6 | Other blood transfusion                                 |
| 36 |       |                                                         |
| 37 |       |                                                         |
| 38 |       |                                                         |
| 39 |       |                                                         |
| 40 |       |                                                         |
| 41 |       |                                                         |
| 42 |       |                                                         |
| 43 |       |                                                         |
| 44 |       |                                                         |
| 45 |       |                                                         |
| 46 |       |                                                         |
| 47 |       |                                                         |
| 48 |       |                                                         |
| 49 |       |                                                         |
| 50 |       |                                                         |
| 51 |       |                                                         |
| 52 |       |                                                         |
| 53 |       |                                                         |
| 54 |       |                                                         |
| 55 |       |                                                         |
| 56 |       |                                                         |
| 57 |       |                                                         |
| 58 |       |                                                         |
| 59 |       |                                                         |
| 60 |       |                                                         |

|    | Medcodeid         | Term                                                            |
|----|-------------------|-----------------------------------------------------------------|
| 1  |                   |                                                                 |
| 2  |                   |                                                                 |
| 3  | 293635019         | Extreme obesity with alveolar hypoventilation                   |
| 4  | 356968010         | Morbid obesity                                                  |
| 5  | 2160062010        | Body mass index 40+ - severely obese                            |
| 6  | 881831000006116   | Hyperalimantation incl.obesity                                  |
| 7  |                   |                                                                 |
| 8  | 1900331000006113  | Obese class III (body mass index equal to or greater than 40.0) |
| 9  | 1991711000006112  | Reason for influenza vaccine - BMI 40+                          |
| 10 | 2350261000000115  | Obese class II (body mass index 35.0 - 39.9)                    |
| 11 | 6763391000006114  | Body mass index 40+ - morbidly obese                            |
| 12 |                   |                                                                 |
| 13 | 6763401000006111  | BMI (body mass index) 40+ - severely obese                      |
| 14 | 8024931000006112  | Severe obesity                                                  |
| 15 | 12113181000006115 | Obese class II                                                  |
| 16 | 13926671000006119 | Obese class III                                                 |
| 17 |                   |                                                                 |
| 18 |                   |                                                                 |
| 19 |                   |                                                                 |
| 20 |                   |                                                                 |
| 21 |                   |                                                                 |
| 22 |                   |                                                                 |
| 23 |                   |                                                                 |
| 24 |                   |                                                                 |
| 25 |                   |                                                                 |
| 26 |                   |                                                                 |
| 27 |                   |                                                                 |
| 28 |                   |                                                                 |
| 29 |                   |                                                                 |
| 30 |                   |                                                                 |
| 31 |                   |                                                                 |
| 32 |                   |                                                                 |
| 33 |                   |                                                                 |
| 34 |                   |                                                                 |
| 35 |                   |                                                                 |
| 36 |                   |                                                                 |
| 37 |                   |                                                                 |
| 38 |                   |                                                                 |
| 39 |                   |                                                                 |
| 40 |                   |                                                                 |
| 41 |                   |                                                                 |
| 42 |                   |                                                                 |
| 43 |                   |                                                                 |
| 44 |                   |                                                                 |
| 45 |                   |                                                                 |
| 46 |                   |                                                                 |
| 47 |                   |                                                                 |
| 48 |                   |                                                                 |
| 49 |                   |                                                                 |
| 50 |                   |                                                                 |
| 51 |                   |                                                                 |
| 52 |                   |                                                                 |
| 53 |                   |                                                                 |
| 54 |                   |                                                                 |
| 55 |                   |                                                                 |
| 56 |                   |                                                                 |
| 57 |                   |                                                                 |
| 58 |                   |                                                                 |
| 59 |                   |                                                                 |
| 60 |                   |                                                                 |

For peer review only

| ICD-10 code | Term                                          |
|-------------|-----------------------------------------------|
| E66.2       | Extreme obesity with alveolar hypoventilation |
| E66.8       | Other obesity, morbid obesity                 |
| Z68.4       | Body mass index [BMI] 40 or greater, adult    |
| Z68.35      | Body mass index [BMI] 35.0-35.9, adult        |
| Z68.36      | Body mass index [BMI] 36.0-36.9, adult        |
| Z68.37      | Body mass index [BMI] 37.0-37.9, adult        |
| Z68.38      | Body mass index [BMI] 38.0-38.9, adult        |

For peer review only



1  
2 Medcodeid  
3 1485215015  
4 940171000006115  
5 940181000006117  
6 940191000006119  
7 940201000006116  
8 1822141000006115  
9 1882331000006116  
10 2189071000000110  
11 8136471000006118  
12 294806015  
13 294815010  
14 294828015  
15 294840015  
16 294874016  
17 401866015  
18 401869010  
19 82151000006114  
20 82171000006116  
21 367051000006112  
22 367071000006119  
23 424531000006118  
24 424541000006111  
25 424551000006113  
26 424571000006115  
27 424671000006116  
28 424681000006118  
29 513691000006116  
30 513701000006116  
31 513721000006114  
32 513731000006112  
33 1715191000006112  
34 1715781000006110  
35 1755901000006112  
36 1755911000006110  
37 2729751000000118  
38 2729991000000112  
39 2957311000006113  
40 3087971000006112  
41 3468391000006115  
42 3743451000006110  
43 3767531000006119  
44 5106081000006110  
45 7127651000006115  
46 7127661000006118  
47 8232571000006118  
48 8232591000006117  
49 294919015  
50 296083012  
51 401859016

For peer review only

1 401860014  
2  
3 362221000006114  
4 362271000006110  
5 362381000006115  
6 362391000006117  
7 362421000006113  
8 882301000006112  
9 1872381000006112  
10 1975621000006117  
11 1975671000006116  
12 1975681000006118  
13 1975691000006115  
14 1975711000006117  
15 1975731000006111  
16 1975761000006119  
17 1975781000006112  
18 1975821000006118  
19 1975851000006110  
20 1975871000006117  
21 1975901000006117  
22 2730111000000111  
23 5568191000006118  
24 7696261000006113  
25 130538010  
26 28758018  
27 43595011  
28 52897013  
29 71539017  
30 107878010  
31 114616017  
32 132503015  
33 294725013  
34 294726014  
35 294727017  
36 294728010  
37 294730012  
38 294731011  
39 294734015  
40 294735019  
41 294736018  
42 294737010  
43 294738017  
44 294739013  
45 294741014  
46 294742019  
47 294743012  
48 294744018  
49 294750011  
50 294751010  
51 294753013

For peer review only

1  
2 294754019  
3 294757014  
4 294758016  
5 294760019  
6 294764011  
7 294765012  
8 294766013  
9 294767016  
10 294768014  
11 294769018  
12 294771018  
13 294773015  
14 294787015  
15 294788013  
16 294789017  
17 294790014  
18 296022017  
19 296031017  
20 296040018  
21 296095012  
22 296096013  
23 346955013  
24 401763015  
25 401764014  
26 401855010  
27 1219653018  
28 1234861017  
29 78531000006116  
30 123611000006110  
31 155141000006116  
32 155161000006117  
33 169061000006112  
34 366571000006114  
35 367951000006113  
36 367971000006115  
37 368001000006112  
38 368011000006110  
39 370451000006110  
40 370631000006117  
41 371031000006115  
42 376251000006112  
43 378051000006119  
44 388741000006110  
45 395021000006111  
46 395031000006114  
47 398631000006113  
48 418221000006118  
49 418261000006112  
50 423041000006119  
51 423271000006116

For peer review only

1  
2 423471000006117  
3 423731000006114  
4 423741000006116  
5 424841000006113  
6 424931000006113  
7 425501000006113  
8 425511000006111  
9 425521000006115  
10 425541000006110  
11 425551000006112  
12 425561000006114  
13 425571000006119  
14 425581000006116  
15 425601000006114  
16 425631000006118  
17 425641000006111  
18 425651000006113  
19 425671000006115  
20 425681000006117  
21 425691000006119  
22 425701000006119  
23 425711000006116  
24 426881000006111  
25 456731000006115  
26 456801000006115  
27 556631000006116  
28 819351000006115  
29 882281000006113  
30 882291000006111  
31 1971471000006117  
32 1972011000006110  
33 1972261000006117  
34 1972861000006118  
35 1973051000006118  
36 1973581000006116  
37 1973831000006119  
38 1974351000006118  
39 1974391000006112  
40 1974431000006118  
41 1974451000006113  
42 1974481000006117  
43 1974541000006112  
44 1974601000006111  
45 1974611000006114  
46 1974621000006118  
47 1974641000006113  
48 1974671000006117  
49 1974721000006114  
50 1974751000006117  
51 1974781000006113

For peer review only

1  
2 1974801000006112  
3 1974831000006116  
4 1974861000006113  
5 1974921000006111  
6 1975051000006119  
7 1975141000006117  
8 1975191000006114  
9 1975211000006110  
10 1975231000006116  
11 1975261000006113  
12 1975281000006115  
13 1975301000006116  
14 1975321000006114  
15 1975351000006117  
16 1975381000006113  
17 1975401000006113  
18 1975431000006117  
19 1975441000006110  
20 1975481000006116  
21 1975491000006118  
22 1975501000006114  
23 1975521000006116  
24 1975551000006113  
25 1975571000006115  
26 1975641000006112  
27 1975751000006116  
28 1975771000006114  
29 1975801000006111  
30 1975831000006115  
31 1975841000006113  
32 1975911000006119  
33 1976001000006113  
34 1976061000006114  
35 1976101000006112  
36 1976121000006119  
37 1976141000006114  
38 1976171000006118  
39 1976881000006112  
40 1976891000006110  
41 1976901000006114  
42 1976911000006112  
43 1976931000006118  
44 1976941000006111  
45 1976951000006113  
46 1976961000006110  
47 3000261000006112  
48 3068121000006112  
49 3118041000006112  
50 3137261000006111  
51 3862661000006112

For peer review only

1 3946141000006118  
2 4082931000006110  
3 4539931000006112  
4 4763641000006116  
5 4763911000006114  
6 4763921000006118  
7 5023901000006110  
8 5248961000006113  
9 5517971000006118  
10 6890801000006117  
11 12480451000006112  
12 10122017  
13 119579013  
14 294662017  
15 294673012  
16 294675017  
17 294676016  
18 294693016  
19 294714016  
20 294721016  
21 294897018  
22 294902017  
23 294913019  
24 294917018  
25 294924017  
26 294941015  
27 294944011  
28 346897015  
29 401768012  
30 401771016  
31 401772011  
32 401862018  
33 1227584015  
34 215851000000112  
35 223601000000119  
36 223611000000117  
37 300411000000110  
38 300931000000113  
39 359091000006115  
40 359161000006110  
41 362781000006116  
42 362981000006119  
43 366551000006116  
44 367061000006114  
45 367991000006119  
46 370981000006112  
47 376271000006119  
48 376281000006116  
49 377461000006113  
50 379901000006113

For peer review only

1  
2 389451000006110  
3 389681000006116  
4 394681000006119  
5 394691000006116  
6 396771000006117  
7 396781000006119  
8 396801000006115  
9 397581000006111  
10 397621000006111  
11 397641000006116  
12 397661000006117  
13 397691000006113  
14 404041000006111  
15 424071000006112  
16 424281000006115  
17 424511000006112  
18 426951000006112  
19 426981000006116  
20 428441000006116  
21 476741000006111  
22 630831000006113  
23 753331000006118  
24 853201000006116  
25 1821481000006114  
26 2502581000000119  
27 3504751000006114  
28 3627341000006115  
29 3630121000006110  
30 3630151000006118  
31 4763211000006118  
32 4763231000006112  
33 4764511000006119  
34 5023531000006114  
35 5023541000006116  
36 5106071000006112  
37 6348061000006115  
38 6515001000006117  
39 6519941000006116  
40 7766271000006113  
41 7790241000006117  
42 7822921000006111  
43 8028531000006112  
44 8089301000006110  
45 8342781000006115  
46 8365411000006116  
47 12115591000006111  
48 12736721000006110  
49 14333601000006113  
50 296110017  
51 882321000006119

For peer review only

1  
2 2730071000000117  
3 2730091000000118  
4 294802018  
5 294803011  
6 294804017  
7 294805016  
8 294807012  
9 294809010  
10 294810017  
11 294811018  
12 294812013  
13 294813015  
14 294818012  
15 294847017  
16 294848010  
17 294849019  
18 294850019  
19 294858014  
20 294860011  
21 294891017  
22 294892012  
23 294893019  
24 294896010  
25 296118012  
26 401765010  
27 401864017  
28 1780205015  
29 2157096015  
30 182861000006110  
31 182871000006115  
32 367081000006116  
33 367111000006110  
34 367151000006111  
35 396071000006119  
36 396741000006113  
37 396761000006112  
38 396791000006116  
39 424661000006111  
40 513741000006119  
41 513801000006112  
42 789221000006116  
43 851691000006114  
44 882311000006110  
45 1971601000006113  
46 1972091000006117  
47 1972351000006113  
48 1972961000006114  
49 1973061000006116  
50 1973121000006111  
51 1973751000006115

For peer review only



1  
2 1973991000006111  
3 1974791000006111  
4 1975411000006111  
5 1975701000006115  
6 3006671000006118  
7  
8 3447781000006113  
9 5023961000006111  
10 5649431000006118  
11 5688921000006114  
12 5688931000006112  
13  
14 12059211000006119  
15 294861010  
16 294862015  
17 294863013  
18 294868016  
19 294869012  
20 294870013  
21 294871012  
22 294872017  
23 294877011  
24 294880012  
25 294881011  
26 294882016  
27 294883014  
28 294888017  
29 294895014  
30 296135011  
31 401865016  
32 82091000006116  
33 367091000006118  
34 367101000006112  
35 367121000006119  
36 367161000006113  
37 398541000006116  
38 513711000006118  
39 513751000006117  
40 513871000006118  
41 701051000006118  
42 701071000006111  
43 1785851000006110  
44 1785861000006112  
45 1785871000006117  
46 1972101000006111  
47 1975931000006113  
48 1975941000006115  
49 2652251000000113  
50 3854401000006113  
51 4767311000006117  
52 5023451000006115  
53 5435901000006117  
54  
55  
56  
57  
58  
59  
60

For peer review only

1 5933701000006116  
2 6891981000006111  
3 8041781000006111  
4 8235161000006110  
5 12059201000006117  
6 12059221000006110  
7 13716031000006110  
8 13911951000006118  
9 1780423014  
10 1780425019  
11 851561000006119  
12 940461000006119  
13 940471000006114  
14 1807681000006114  
15 4082431000006119  
16 5513141000006117  
17 6047261000006111  
18 6650041000006113  
19 13796551000006113  
20 3062551000006110  
21 5253131000006114  
22 5272841000006115  
23 4764871000006114  
24 295017014  
25 296254015  
26 296255019  
27 269821000006113  
28 400321000006113  
29 4764881000006112  
30 94597012  
31 251631011  
32 317233013  
33 317235018  
34 372208017  
35 363321000006111  
36 366521000006113  
37 960281000006115  
38 3423851000006118  
39 3799251000006119  
40 3799261000006117  
41 12717671000006110  
42 1222496015  
43 366541000006118  
44 368051000006111  
45 368061000006113  
46 527421000006116  
47 3027091000006119  
48 3468921000006116  
49 8039381000006110  
50 295436010

For peer review only

1  
2 295437018  
3 295451018  
4 295452013  
5 296361019  
6 296379015  
7 401889011  
8 1780181019  
9 577901000006119  
10 664031000000110  
11 882611000006115  
12 988931000006112  
13 1620911000006112  
14 1664151000006114  
15 1764491000006116  
16 1776641000006112  
17 1911761000006111  
18 2308361000000115  
19 2451711000000111  
20 2652391000000113  
21 5550181000006114  
22 6025191000006115  
23 6452531000006114  
24 7079921000006119  
25 7230101000006110  
26 7567401000006119  
27 8274831000006110  
28 8440231000006115  
29 14232971000006112  
30 424681000006118  
31 424671000006116  
32 424551000006113  
33 424541000006111  
34 379771000006116  
35 424571000006115  
36 396081000006116  
37 424531000006118  
38 1755911000006110  
39 1755901000006112  
40 1715191000006112  
41 1715781000006110  
42 1715181000006114  
43 1715771000006112  
44 426981000006116  
45 426961000006114  
46 426951000006112  
47 426921000006115  
48 401869010  
49 882831000006113  
50 223741000000112  
51 426891000006114

For peer review only

1  
2 401866015  
3 425691000006119  
4 425561000006114  
5 425501000006113  
6 423041000006119  
7  
8 295536013  
9 138421012  
10 294918011  
11 294917018  
12  
13 294845013  
14 182801000006114  
15 294840015  
16 182771000006112  
17 294838013  
18 294837015  
19  
20 294836012  
21 182721000006111  
22 294832014  
23 142521000006110  
24 294828015  
25 142541000006115  
26 474171000006112  
27 401766011  
28 613791000006115  
29 294647019  
30 294646011  
31 294644014  
32 294642013  
33 1839581000006112  
34 1975191000006114  
35 1975211000006110  
36 1975231000006116  
37 1975261000006113  
38 1975281000006115  
39 1975321000006114  
40 1976921000006116  
41 388071000006116  
42  
43  
44  
45  
46  
47  
48  
49  
50  
51  
52  
53  
54  
55  
56  
57  
58  
59  
60

For peer review only

|    |                                                                                        |
|----|----------------------------------------------------------------------------------------|
| 1  |                                                                                        |
| 2  | Term                                                                                   |
| 3  | On severe mental illness register                                                      |
| 4  | Severe mental illness monitoring administration                                        |
| 5  | Severe mental illness monitoring invite 1                                              |
| 6  | Severe mental illness monitoring invite 2                                              |
| 7  | Severe mental illness monitoring invite 3                                              |
| 8  | Severe mental illness - enhanced services administration                               |
| 9  | Severe mental illness - enhanced service completed                                     |
| 10 | Severe mental illness enhanced services administration                                 |
| 11 | Patient suffering from severe mental impairment under Mental Health Act 1983           |
| 12 | Single manic episode, severe, with psychosis                                           |
| 13 | Recurrent manic episodes, severe, with psychosis                                       |
| 14 | Single major depressive episode, severe, with psychosis                                |
| 15 | Recurrent major depressive episodes, severe, with psychosis                            |
| 16 | Mixed bipolar affective disorder, severe, with psychosis                               |
| 17 | [X]Severe depressive episode without psychotic symptoms                                |
| 18 | [X]Severe depressive episode with psychotic symptoms                                   |
| 19 | Severe bipolar disorder without psychotic features                                     |
| 20 | Severe bipolar disorder with psychotic features                                        |
| 21 | Severe depressed bipolar I disorder without psychotic features                         |
| 22 | Bipolar affective disorder, currently manic, severe, with psychosis                    |
| 23 | [X]Recurr depress disorder cur epi severe without psyc sympt                           |
| 24 | [X]Recurr severe episodes/major depression+psychotic symptom                           |
| 25 | [X]Recurr severe episodes/psychogenic depressive psychosis                             |
| 26 | [X]Recurrent depress disorder cur epi severe with psyc symp                            |
| 27 | [X]Recurrent severe episodes of psychotic depression                                   |
| 28 | Recurrent reactive depressive episodes, severe, with psychosis                         |
| 29 | Severe manic bipolar I disorder without psychotic features                             |
| 30 | Bipolar affect disord, currently manic,severe with psychosis                           |
| 31 | Bipolar affect disord, now depressed, severe with psychosis                            |
| 32 | Bipolar affect disord, now depressed, severe, no psychosis                             |
| 33 | Severe major depression with psychotic features                                        |
| 34 | Severe major depression without psychotic features                                     |
| 35 | [X]Single major depressive episode, severe, with psychosis, psychosis in remission     |
| 36 | [X]Recurrent major depressive episodes, severe, with psychosis, psychosis in remission |
| 37 | Recurrent depression with current severe episode and psychotic features                |
| 38 | Recurrent depression with current severe episode without psychotic features            |
| 39 | Severe recurrent major depression with psychotic features                              |
| 40 | Severe recurrent major depression without psychotic features                           |
| 41 | Severe bipolar I disorder, most recent episode depressed with psychotic features       |
| 42 | Severe major depression, single episode, without psychotic features                    |
| 43 | Severe major depression, single episode, with psychotic features, mood-congruent       |
| 44 | Severe postnatal psychosis                                                             |
| 45 | Severe major depression, single episode, with psychotic features                       |
| 46 | Major depressive disorder, single episode, severe with psychotic features              |
| 47 | Single major depressive episode, severe, with psychosis, psychosis in remission        |
| 48 | Recurrent major depressive episodes, severe, with psychosis, psychosis in remission    |
| 49 | Acute hysterical psychosis                                                             |
| 50 | [X]Other acute and transient psychotic disorders                                       |
| 51 | [X]Other acute predominantly delusional psychotic disorders                            |

1 [X]Acute and transient psychotic disorder, unspecified  
2 [X]Acute / subacute infective psychosis  
3 Acute transient psychotic disorder  
4 Acute polymorphic psychotic disorder co-occurrent with symptoms of schizophrenia  
5 Acute polymorphic psychotic disorder without symptoms of schizophrenia  
6 Acute schizophrenia-like psychotic disorder  
7 Acute schizo affective psychosis  
8 Accom status - NHS acute psychiatric ward  
9 Acute polymorphic psychot disord without symp of schizoph, without associated acute stress  
10 Acute polymorphic psychot disord without symp of schizoph, with associated acute stress  
11 Acute polymorphic psychot disord with symp of schizophren, without associated acute stress  
12 Acute polymorphic psychot disord with symp of schizophren, with associated acute stress  
13 Acute schizophrenia-like psychotic disorder, without associated acute stress  
14 Acute schizophrenia-like psychotic disorder, with associated acute stress  
15 Other acute predominantly delusional psychotic disorders, without associated acute stress  
16 Other acute predominantly delusional psychotic disorders, with associated acute stress  
17 Other acute and transient psychotic disorders, without associated acute stress  
18 Other acute and transient psychotic disorders, with associated acute stress  
19 Acute and transient psychotic disorder, unspecified, without associated acute stress  
20 Acute and transient psychotic disorder, unspecified, with associated acute stress  
21 Acute predominantly delusional psychotic disorder  
22 Acute polymorphic psychotic disorder  
23 Acute polymorphic psychotic disorder with symptoms of schizophrenia  
24 Nervous breakdown  
25 Subchronic schizophrenia  
26 Residual schizophrenia  
27 Chronic paranoid schizophrenia  
28 Subchronic catatonic schizophrenia  
29 Paranoid schizophrenia  
30 Chronic catatonic schizophrenia  
31 Subchronic paranoid schizophrenia  
32 Schizophrenic disorders  
33 Schizophrenia simplex  
34 Simple schizophrenia  
35 Unspecified schizophrenia  
36 Acute exacerbation of subchronic schizophrenia  
37 Acute exacerbation of chronic schizophrenia  
38 Simple schizophrenia NOS  
39 Unspecified hebephrenic schizophrenia  
40 Subchronic hebephrenic schizophrenia  
41 Chronic hebephrenic schizophrenia  
42 Acute exacerbation of subchronic hebephrenic schizophrenia  
43 Acute exacerbation of chronic hebephrenic schizophrenia  
44 Hebephrenic schizophrenia NOS  
45 Catatonic schizophrenia  
46 [X]Schizophrenic flexibilatis cerea  
47 Unspecified catatonic schizophrenia  
48 Acute exacerbation of subchronic catatonic schizophrenia  
49 Acute exacerbation of chronic catatonic schizophrenia  
50 Catatonic schizophrenia NOS

1 Unspecified paranoid schizophrenia  
2 Acute exacerbation of subchronic paranoid schizophrenia  
3 Acute exacerbation of chronic paranoid schizophrenia  
4 Paranoid schizophrenia NOS  
5 Latent schizophrenia  
6 Unspecified latent schizophrenia  
7 Subchronic latent schizophrenia  
8 Chronic latent schizophrenia  
9 Acute exacerbation of subchronic latent schizophrenia  
10 Acute exacerbation of chronic latent schizophrenia  
11 Latent schizophrenia NOS  
12 Cyclic schizophrenia  
13 Coenesthopathic schizophrenia  
14 Cenesthopathic schizophrenia  
15 Other schizophrenia NOS  
16 Schizophrenia  
17 [X]Schizophrenia, schizotypal and delusional disorders  
18 Undifferentiated schizophrenia  
19 [X]Schizophrenia, unspecified  
20 [X]Other schizoaffective disorders  
21 [X]Schizoaffective disorder, unspecified  
22 Childhood schizophrenia NOS  
23 Acute schizophrenic episode  
24 Other schizophrenia  
25 [X]Other schizophrenia  
26 Atypical schizophrenia  
27 Chronic schizophrenic  
28 Unspecified schizo-affective schizophrenia  
29 Subchronic schizo-affective schizophrenia  
30 Schizoaffective schizophrenia  
31 Schizo-affective schizophrenia NOS  
32 Restzustand - schizophrenia  
33 [X]Atypical schizophrenia  
34 Borderline schizophrenia  
35 [X]Bouffee delirante with symptoms of schizophrenia  
36 [X]Brief schizophreniform disorder  
37 [X]Brief schizophreniform psych  
38 [X]Catatonic schizophrenia  
39 [X]Cenesthopathic schizophrenia  
40 [X]Chronic undifferentiated schizophrenia  
41 [X]Cyclic schizophrenia  
42 [X]Disorganised schizophrenia  
43 [X]Hebephrenic schizophrenia  
44 [X]Latent schizophrenia  
45 [X]Latent schizophrenic reaction  
46 Mixed schizophrenic and affective psychosis  
47 [X]Paranoid schizophrenia  
48 [X]Paraphrenic schizophrenia  
49 [X]Post-schizophrenic depression  
50 Prepsychotic schizophrenia

1 Prodromal schizophrenia  
2  
3 [X]Pseudoneurotic schizophrenia  
4 [X]Pseudopsychopathic schizophrenia  
5 [X]Residual schizophrenia  
6 [X]Restzustand schizophrenic  
7  
8 Schizoaffective disorder, depressive type  
9 Schizoaffective disorder, manic type  
10 Schizoaffective disorder, mixed type  
11 Schizoaffective disorder  
12 [X]Schizoaffective psychosis NOS  
13 [X]Schizoaffective psychosis, depressive type  
14 [X]Schizoaffective psychosis, manic type  
15 [X]Schizoid disorder of childhood  
16 [X]Schizophrenia  
17 [X]Schizophrenia-like psychosis in epilepsy  
18 [X]Schizophrenic catalepsy  
19 [X]Schizophrenic catatonia  
20 [X]Schizophrenic reaction  
21 [X]Schizophreniform disord NOS  
22 [X]Schizophreniform psychosis, depressive type  
23 [X]Schizophreniform psychosis, manic type  
24 [X]Schizophrenifrm psychos NOS  
25 [X]Simple schizophrenia  
26  
27 Acute exacerbation of chronic schizo-affective schizophrenia  
28 Acute exacerbation subchronic schizo-affective schizophrenia  
29 Chronic schizoaffective schizophrenia  
30 Hebephrenic schizophrenia  
31 Schizophrenic psychoses NOS  
32 Schizophrenic psychoses  
33 Mental & behav dis due to use opioids: psychotic disorder, schizophrenia-like  
34 Mental & behav dis due to hallucinogens: psychotic disord, schizophrenia-like  
35 Mental & behav dis due to cannabinoids: psychotic disordr, schizophrenia-like  
36 Mental & behav dis due to seds/hypntcs: psychotic disordr, schizophrenia-like  
37 Mental & behav dis due to vol solvents: psychotic disordr, schizophrenia-like  
38 Mental & behav dis due to use cocaine: psychotic disorder, schizophrenia-like  
39 Ment/behav dis mlti drug use/oth psyc sbs: psychotc dis, schizophrenia-like  
40 Paranoid schizophrenia, continuous  
41 Paranoid schizophrenia, episodic with progressive deficit  
42 Paranoid schizophrenia, episodic with stable deficit  
43 Paranoid schizophrenia, episodic remittent  
44 Paranoid schizophrenia, incomplete remission  
45 Paranoid schizophrenia, course uncertain, period of observation too short  
46 Hebephrenic schizophrenia, continuous  
47 Hebephrenic schizophrenia, episodic with progressive deficit  
48 Hebephrenic schizophrenia, episodic with stable deficit  
49 Hebephrenic schizophrenia, episodic remittent  
50 Hebephrenic schizophrenia, incomplete remission  
51 Hebephrenic schizophrenia, course uncertain, period of observation too short  
52 Catatonic schizophrenia, continuous  
53 Catatonic schizophrenia, episodic with progressive deficit



- 1 Catatonic schizophrenia, episodic with stable deficit
- 2 Catatonic schizophrenia, episodic remittent
- 3 Catatonic schizophrenia, incomplete remission
- 4 Catatonic schizophrenia, course uncertain, period of observation too short
- 5 Undifferentiated schizophrenia, incomplete remission
- 6 Mental & behav dis due to use alcohol: psychotic disorder, schizophrenia-like
- 7 Post-schizophrenic depression, continuous
- 8 Post-schizophrenic depression, episodic with progressive deficit
- 9 Post-schizophrenic depression, episodic with stable deficit
- 10 Post-schizophrenic depression, episodic remittent
- 11 Post-schizophrenic depression, incomplete remission
- 12 Post-schizophrenic depression, complete remission
- 13 Post-schizophrenic depression, course uncertain, period of observation too short
- 14 Residual schizophrenia, continuous
- 15 Residual schizophrenia, episodic with progressive deficit
- 16 Residual schizophrenia, episodic with stable deficit
- 17 Residual schizophrenia, episodic remittent
- 18 Residual schizophrenia, incomplete remission
- 19 Residual schizophrenia, course uncertain, period of observation too short
- 20 Simple schizophrenia, continuous
- 21 Simple schizophrenia, episodic with progressive deficit
- 22 Simple schizophrenia, episodic with stable deficit
- 23 Simple schizophrenia, episodic remittent
- 24 Simple schizophrenia, incomplete remission
- 25 Simple schizophrenia, course uncertain, period of observation too short
- 26 Other schizophrenia, continuous
- 27 Other schizophrenia, episodic with progressive deficit
- 28 Other schizophrenia, episodic with stable deficit
- 29 Other schizophrenia, episodic remittent
- 30 Other schizophrenia, incomplete remission
- 31 Other schizophrenia, course uncertain, period of observation too short
- 32 Schizophrenia, unspecified, continuous
- 33 Schizophrenia, unspecified, episodic with progressive deficit
- 34 Schizophrenia, unspecified, episodic with stable deficit
- 35 Schizophrenia, unspecified, episodic remittent
- 36 Schizophrenia, unspecified, incomplete remission
- 37 Schizophrenia, unspecified, course uncertain, period of observation too short
- 38 Paranoid schizophrenia, other
- 39 Hebephrenic schizophrenia, other
- 40 Catatonic schizophrenia, other
- 41 Undifferentiated schizophrenia, other
- 42 Residual schizophrenia, other
- 43 Simple schizophrenia, other
- 44 Other schizophrenia, other
- 45 Schizophrenia, unspecified, other
- 46 Schizotypal disorder
- 47 Disorganised schizophrenia
- 48 Schizoaffective disorder, bipolar type
- 49 Undifferentiated schizophrenia in remission
- 50 Chronic schizophrenia

1 Schizophreniform disorder  
2 Schizophrenic reaction  
3 History of schizophrenia  
4 Acute exacerbation of chronic disorganised schizophrenia  
5 Acute exacerbation of subchronic schizoaffective schizophrenia  
6 Acute exacerbation of chronic schizoaffective schizophrenia  
7 Post-schizophrenic depression  
8 Schizophrenic prodrome  
9 Mixed schizophrenic and affective psychosis  
10 Late onset schizophrenia  
11 [X]Schizophrenia, schizotypal and delusional disorders  
12 Brief reactive psychosis  
13 Disintegrative psychosis  
14 Korsakov's alcoholic psychosis with peripheral neuritis  
15 Other alcoholic psychosis  
16 Other alcoholic psychosis NOS  
17 Alcoholic psychosis NOS  
18 Drug psychosis NOS  
19 Postpartum psychosis  
20 Chronic organic psychosis NOS  
21 Affective psychosis  
22 Other affective psychosis NOS  
23 Paranoid psychosis  
24 Reactive depressive psychosis  
25 Psychogenic paranoid psychosis  
26 Disintegrative psychosis NOS  
27 Borderline psychosis of childhood  
28 Presbyophrenic psychosis  
29 Chronic paranoid psychosis  
30 Non-organic psychosis NOS  
31 Child psychosis NOS  
32 [X]Unspecified nonorganic psychosis  
33 [V]Personal history of manic-depressive psychosis  
34 [X]Paranoid psychosis  
35 Manic psychosis  
36 Non-organic psychosis  
37 H/O: psychosis  
38 Referral to psychosis early intervention service  
39 [X] Presenile psychosis NOS  
40 [X] Senile psychosis NOS  
41 [X]Affective psychosis NOS  
42 [X]Alcoholic psychosis NOS  
43 [X]Atypical childhood psychosis  
44 Psychosis and severe depression co-occurrent and due to bipolar affective disorder  
45 [X]Brief reactive psychosis NOS  
46 [X]Chronic hallucinatory psychosis  
47 [X]Cycloid psychosis  
48 Cycloid psychosis  
49 [X]Disintegrative psychosis  
50 [X]Epileptic psychosis NOS

- 1
- 2 [X]Hysterical psychosis
- 3 [X]Infantile psychosis
- 4 Korsakoff's psychosis
- 5 [X]Korsakov's psychosis, nonalcoholic
- 6 [X] Manic-depressive psychosis, depressed type without psychotic symptoms
- 7 [X]Manic-depress psychosis,depressed type+psychotic symptoms
- 8 Manic-depressive psychosis
- 9 Cannabis-induced psychosis
- 10 Alcohol-induced psychosis
- 11 Cocaine-induced psychosis
- 12 Opioid-induced psychosis
- 13 Volatile inhalant-induced psychosis
- 14 [X]Organic psychosis NOS
- 15 [X]Psychogenic paranoid psychosis
- 16 [X]Puerperal psychosis NOS
- 17 [X]Reactive psychosis
- 18 [X]Single episode of psychogenic depressive psychosis
- 19 [X]Single episode of reactive depressive psychosis
- 20 [X]Symbiotic psychosis
- 21 Alcohol-induced psychosis
- 22 Drug psychosis
- 23 Korsakov alcoholic psychosis
- 24 Obsessional compulsive psychosis
- 25 Possible early psychosis
- 26 CBTp - cognitive behavioural therapy for psychosis
- 27 Induced psychosis
- 28 Psychosis
- 29 Korsakoff psychosis
- 30 Korsakov psychosis
- 31 Drug-induced psychosis
- 32 Drug induced psychosis
- 33 Psychosis with origin in childhood
- 34 Epileptic psychosis
- 35 Psychosis associated with intensive care
- 36 Mild postnatal psychosis
- 37 Senile dementia with psychosis
- 38 Early intervention in psychosis
- 39 Early intervention in psychosis - <1 contact/month
- 40 Cognitive behavioural therapy for psychosis
- 41 Psychosis co-occurrent and due to Parkinson's disease
- 42 Provision of information about psychosis
- 43 Early intervention in psychosis team
- 44 Reactive depressive psychosis, single episode
- 45 Psychoactive substance-induced psychosis
- 46 Family intervention for psychosis
- 47 Referral for cognitive behavioural therapy for psychosis
- 48 FEP - first episode psychosis
- 49 Family intervention for psychosis and bipolar disorder
- 50 Mania
- 51 Mania/hypomania
- 52
- 53
- 54
- 55
- 56
- 57
- 58
- 59
- 60

1 Mania with mood-incongruent psychotic features  
2 Mania with psychotic features  
3 Single manic episode, unspecified  
4 Single manic episode, mild  
5 Single manic episode, moderate  
6 Single manic episode, severe  
7 Single manic episode in partial remission  
8 Manic disorder, single episode NOS  
9 Recurrent manic episodes  
10 Recurrent manic episodes, unspecified  
11 Recurrent manic episodes, mild  
12 Recurrent manic episodes, moderate  
13 Recurrent manic episode NOS  
14 Manic-depressive - now manic  
15 Bipolar affective disorder, currently manic, unspecified  
16 Bipolar affective disorder, currently manic, mild  
17 Bipolar affective disorder, currently manic, moderate  
18 Bipolar affective disorder, currently manic, NOS  
19 Manic-depressive - now depressed  
20 Other and unspecified manic-depressive psychoses  
21 Unspecified manic-depressive psychoses  
22 Atypical manic disorder  
23 Other and unspecified manic-depressive psychoses NOS  
24 [X]Other manic episodes  
25 Manic disorder, single episode  
26 [X]Manic episode, unspecified  
27 H/O: manic depressive disorder  
28 Manic mood  
29 Recurrent manic episodes, in partial remission  
30 Recurrent manic episodes, severe  
31 [X]Bipolar affect disorder cur epi manic wout psychotic symp  
32 Bipolar affective disorder, current episode hypomanic  
33 [X]Bipolar disorder, single manic episode  
34 [X]Manic-depressive reaction  
35 [X]Manic episode  
36 [X]Manic stupor  
37 Manic-depressive illness  
38 [X]Recurrent manic episodes  
39 Manic bipolar I disorder in partial remission  
40 Bipolar affective disorder, current episode manic  
41 Hypomanic psychoses  
42 Hypomanic  
43 Manic-depressive psychoses  
44 Mental & behav dis due to use opioids: psychotic disorder, predominantly manic symptoms  
45 Organic manic disorder  
46 Mental & behav dis due to cannabinoids: psychotic disorder, predominantly manic symptoms  
47 Mental & behav dis due to sedatives/hypnotics: psychotic disorder, predominantly manic symptoms  
48 Mental & behav dis due to hallucinogens: psychotic disorder, predominantly manic symptoms  
49 Mental & behav dis due to volatile solvents: psychotic disorder, predominantly manic symptoms  
50 Mental & behav dis due to use cocaine: psychotic disorder, predominantly manic symptoms

1  
2 Ment/behav dis mlti drug use/oth psyc sbs: psychotc dis, predominantly manic symptoms  
3 Mental & behav dis due to use tobacco: psychotic disorder, predominantly manic symptoms  
4 Mental & behav dis due to use alcohol: psychotic disorder, predominantly manic symptoms  
5 Mental and behav dis due to other stimulants inc caffeine: psychotic dis, predominantly manic symptom  
6 Bipolar I disorder, most recent episode hypomanic  
7 Organic mood disorder of manic type  
8 Manic  
9 Hypomanic mood  
10 Manic behaviour  
11 Manic behavior  
12 Bipolar disorder, most recent episode manic  
13 Bipolar affective disorder, currently depressed, unspecified  
14 Bipolar affective disorder, currently depressed, mild  
15 Bipolar affective disorder, currently depressed, moderate  
16 Bipolar affective disorder, currently depressed, NOS  
17 Mixed bipolar affective disorder  
18 Mixed bipolar affective disorder, unspecified  
19 Mixed bipolar affective disorder, mild  
20 Mixed bipolar affective disorder, moderate  
21 Mixed bipolar affective disorder, NOS  
22 Unspecified bipolar affective disorder  
23 Unspecified bipolar affective disorder, unspecified  
24 Mild bipolar disorder  
25 Moderate bipolar disorder  
26 Unspecified bipolar affective disorder, NOS  
27 Mixed bipolar I disorder  
28 [X]Bipolar affective disorder, unspecified  
29 [X]Other bipolar affective disorders  
30 Bipolar disorder in partial remission  
31 [X]Bipolar affect disorder cur epi mild or moderate depressn  
32 Bipolar affective disorder  
33 [X]Bipolar affective disorder, current episode mixed  
34 [X]Bipolar II disorder  
35 Bipolar affective disorder , current episode mixed  
36 Depressed bipolar I disorder in partial remission  
37 Bipolar affective disorder, current episode depression  
38 Bipolar disorder  
39 Mixed bipolar affective disorder, partial/unspec remission  
40 Mixed bipolar affective disorder, severe  
41 Bipolar I disorder  
42 Bipolar II disorder  
43 [X]Bipolar II disorder  
44 Organic bipolar affective disorder  
45 Bipolar affect disorder cur epi mild or moderate depressn, without somatic syndrome  
46 Bipolar affect disorder cur epi mild or moderate depressn, with somatic syndrome  
47 Signposting to Bipolar UK  
48 Bipolar 2 disorder  
49 Bipolar affective disorder, current episode mixed  
50 Organic bipolar disorder  
51 Bipolar

1 Profile of mood states, bipolar  
2 Referral for bipolar disorder  
3 Rapid cycling bipolar I disorder  
4 Mixed bipolar affective disorder, in partial remission  
5 Bipolar disorder, most recent episode depression  
6 Bipolar affective disorder, most recent episode mixed  
7 Bipolar disorder caused by drug  
8 Rapid cycling bipolar II disorder  
9 Thoughts of deliberate self harm  
10 Intent of deliberate self harm with detailed plans  
11 Risk of deliberate self harm  
12 H/O: deliberate self harm outside prison  
13 H/O: deliberate self harm within prison  
14 High risk of deliberate self harm  
15 Thoughts of self harm  
16 Suicide and self harm  
17 History of deliberate self harm  
18 At risk for deliberate self harm  
19 Obsessional thoughts of causing self harm  
20 Self-induced vomiting  
21 Self-induced purging to lose weight  
22 Self-induced purging  
23 OCD - Obsessive-compulsive disorder  
24 Obsessive-compulsive disorder NOS  
25 [X]Other obsessive-compulsive disorders  
26 [X]Obsessive-compulsive disorder, unspecified  
27 Obsessive-compulsive disorder  
28 [X]Obsessive - compulsive disorder  
29 Obsessive compulsive disorder  
30 Anorexia nervosa  
31 H/O: anorexia nervosa  
32 [D]Anorexia  
33 [D]Anorexia NOS  
34 Anorexia symptom  
35 [X]Anorexia nervosa  
36 Atypical anorexia nervosa  
37 Anorexia  
38 AN - Anorexia nervosa  
39 Anorexia  
40 Anorexic  
41 [D]Anorexia  
42 Bulimia  
43 Atypical bulimia nervosa  
44 Bulimia nervosa  
45 [X]Bulimia NOS  
46 Bulimia (non-organic overeating)  
47 Bulimia nervosa, purging type  
48 Bulimia nervosa, nonpurging type  
49 History of bulimia nervosa  
50 Other and unspecified non-organic eating disorders

1 Unspecified non-organic eating disorder  
 2 Other specified non-organic eating disorder  
 3 Non-organic eating disorder NOS  
 4 Eating disorder  
 5 [X]Eating disorder, unspecified  
 6 [X]Other eating disorders  
 7 Referral to eating disorders clinic  
 8 Compulsive eating disorder  
 9 Seen in eating disorder clinic  
 10 Eating disorder NOS - psychog.  
 11 Eating disorder NOS - psychog.  
 12 Eating disorders  
 13 Seen in eating disorders clinic  
 14 Referral to eating disorders outreach clinic  
 15 Reason for referral: Eating Disorder  
 16 FACE CARAS - Eating Disorder Schedule (FEDS)  
 17 Suspected binge eating disorder  
 18 Eating disorder care plan  
 19 Signposting to Beat (beating eating disorders) support group  
 20 Eating disorders inventory  
 21 Eating disorder counselling  
 22 Eating disorders management  
 23 Dietary education for eating disorder  
 24 Binge eating disorder  
 25 Eating disorder clinic  
 26 Eating disorders service  
 27 Eating disorder co-occurrent with diabetes mellitus type 1  
 28 Group CBT-ED (cognitive behavioural therapy for eating disorder)  
 29 [X]Recurrent severe episodes/reactive depressive psychosis  
 30 [X]Recurrent severe episodes of psychotic depression  
 31 [X]Recurr severe episodes/psychogenic depressive psychosis  
 32 [X]Recurr severe episodes/major depression+psychotic symptom  
 33 [X]Endogenous depression with psychotic symptoms  
 34 [X]Recurrent depress disorder cur epi severe with psyc symp  
 35 [X]Major depression, recurrent without psychotic symptoms  
 36 [X]Recurr depress disorder cur epi severe without psyc sympt  
 37 Recurrent major depressive episodes, severe, with psychosis, psychosis in remission  
 38 Single major depressive episode, severe, with psychosis, psychosis in remission  
 39 [X]Major depression, severe with psychotic symptoms  
 40 [X]Major depression, severe without psychotic symptoms  
 41 [X]Major depression, moderately severe  
 42 [X]Major depression, mild  
 43 [X]Single episode of reactive depressive psychosis  
 44 [X]Single episode of psychotic depression  
 45 [X]Single episode of psychogenic depressive psychosis  
 46 [X]Single episode of major depression and psychotic symptoms  
 47 [X]Severe depressive episode with psychotic symptoms  
 48 Severe depression  
 49 [X]Single episode major depression w'out psychotic symptoms  
 50 [X]Single episode agitated depressn w'out psychotic symptoms  
 51  
 52  
 53  
 54  
 55  
 56  
 57  
 58  
 59  
 60



1  
2 [X]Severe depressive episode without psychotic symptoms  
3 [X]Schizophreniform psychosis, depressive type  
4 [X]Schizoaffective psychosis, depressive type  
5 [X]Schizoaffective disorder, depressive type  
6 [X]Post-schizophrenic depression  
7 Postviral depression  
8 Agitated depression  
9 Psychotic reactive depression  
10 Reactive depressive psychosis  
11 Recurrent major depressive episode NOS  
12 Recurrent major depressive episodes,partial/unspec remission  
13 Recurrent major depressive episodes, severe, with psychosis  
14 Recurrent major depressive episodes, severe, no psychosis  
15 Recurrent major depressive episodes, moderate  
16 Recurrent major depressive episodes, mild  
17 Recurrent major depressive episodes, unspecified  
18 Recurrent major depressive episode  
19 Single major depressive episode NOS  
20 Single major depressive episode, partial or unspec remission  
21 Single major depressive episode, severe, with psychosis  
22 Single major depressive episode, severe, without psychosis  
23 Agitated depression  
24 Single major depressive episode  
25 Depressive psychoses  
26 Senile dementia with depressive or paranoid features NOS  
27 Senile dementia with depression  
28 Senile dementia with depressive or paranoid features  
29 Presenile dementia with depression  
30 PHQ9 total score 20-27 (severe depression)  
31 Post-schizophrenic depression, continuous  
32 Post-schizophrenic depression, episodic with progressive deficit  
33 Post-schizophrenic depression, episodic with stable deficit  
34 Post-schizophrenic depression, episodic remittent  
35 Post-schizophrenic depression, incomplete remission  
36 Post-schizophrenic depression, course uncertain, period of observation too short  
37 Post-schizophrenic depression, other  
38 [X]Generalized anxiety disorder  
39  
40  
41  
42  
43  
44  
45  
46  
47  
48  
49  
50  
51  
52  
53  
54  
55  
56  
57  
58  
59  
60



1  
2  
3  
4  
5  
6  
7  
8  
9  
10  
11  
12  
13  
14  
15  
16  
17  
18  
19  
20  
21  
22  
23  
24  
25  
26  
27  
28  
29  
30  
31  
32  
33  
34  
35  
36  
37  
38  
39  
40  
41  
42  
43  
44  
45  
46  
47  
48  
49  
50  
51  
52  
53  
54  
55  
56  
57  
58  
59  
60

For peer review only

1  
2  
3  
4  
5  
6  
7  
8  
9  
10  
11  
12  
13  
14  
15  
16  
17  
18  
19  
20  
21  
22  
23  
24  
25  
26  
27  
28  
29  
30  
31  
32  
33  
34  
35  
36  
37  
38  
39  
40  
41  
42  
43  
44  
45  
46  
47  
48  
49  
50  
51  
52  
53  
54  
55  
56  
57  
58  
59  
60

For peer review only

1  
2  
3  
4  
5  
6  
7  
8  
9  
10  
11  
12  
13  
14  
15  
16  
17  
18  
19  
20  
21  
22  
23  
24  
25  
26  
27  
28  
29  
30  
31  
32  
33  
34  
35  
36  
37  
38  
39  
40  
41  
42  
43  
44  
45  
46  
47  
48  
49  
50  
51  
52  
53  
54  
55  
56  
57  
58  
59  
60

For peer review only

1  
2  
3  
4  
5  
6  
7  
8  
9  
10  
11  
12  
13  
14  
15  
16  
17  
18  
19  
20  
21  
22  
23  
24  
25  
26  
27  
28  
29  
30  
31  
32  
33  
34  
35  
36  
37  
38  
39  
40  
41  
42  
43  
44  
45  
46  
47  
48  
49  
50  
51  
52  
53  
54  
55  
56  
57  
58  
59  
60

For peer review only

1  
2  
3  
4  
5  
6  
7  
8  
9  
10  
11  
12  
13  
14  
15  
16  
17  
18  
19  
20  
21  
22  
23  
24  
25  
26  
27  
28  
29  
30  
31  
32  
33  
34  
35  
36  
37  
38  
39  
40  
41  
42  
43  
44  
45  
46  
47  
48  
49  
50  
51  
52  
53  
54  
55  
56  
57  
58  
59  
60

For peer review only

1  
2  
3  
4  
5  
6  
7  
8  
9  
10  
11  
12  
13  
14  
15  
16  
17  
18  
19  
20  
21  
22  
23  
24  
25  
26  
27  
28  
29  
30  
31  
32  
33  
34  
35  
36  
37  
38  
39  
40  
41  
42  
43  
44  
45  
46  
47  
48  
49  
50  
51  
52  
53  
54  
55  
56  
57  
58  
59  
60

For peer review only

1  
2  
3  
4  
5  
6  
7  
8  
9  
10  
11  
12  
13  
14  
15  
16  
17  
18  
19  
20  
21  
22  
23  
24  
25  
26  
27  
28  
29  
30  
31  
32  
33  
34  
35  
36  
37  
38  
39  
40  
41  
42  
43  
44  
45  
46  
47  
48  
49  
50  
51  
52  
53  
54  
55  
56  
57  
58  
59  
60

For peer review only

1  
2  
3  
4  
5  
6  
7  
8  
9  
10  
11  
12  
13  
14  
15  
16  
17  
18  
19  
20  
21  
22  
23  
24  
25  
26  
27  
28  
29  
30  
31  
32  
33  
34  
35  
36  
37  
38  
39  
40  
41  
42  
43  
44  
45  
46  
47  
48  
49  
50  
51  
52  
53  
54  
55  
56  
57  
58  
59  
60

For peer review only



1  
2  
3  
4  
5  
6  
7  
8  
9  
10  
11  
12  
13  
14  
15  
16  
17  
18  
19  
20  
21  
22  
23  
24  
25  
26  
27  
28  
29  
30  
31  
32  
33  
34  
35  
36  
37  
38  
39  
40  
41  
42  
43  
44  
45  
46  
47  
48  
49  
50  
51  
52  
53  
54  
55  
56  
57  
58  
59  
60

ms

For peer review only

|    |             |
|----|-------------|
| 1  |             |
| 2  | ICD-10 code |
| 3  | F06.0       |
| 4  | F06.1       |
| 5  | F06.2       |
| 6  | F06.3       |
| 7  | F06.4       |
| 8  | F06.5       |
| 9  | F06.6       |
| 10 | F06.6       |
| 11 | F10.1       |
| 12 | F10.2       |
| 13 | F10.3       |
| 14 | F10.4       |
| 15 | F10.5       |
| 16 | F10.6       |
| 17 | F10.7       |
| 18 | F10.8       |
| 19 | F10.9       |
| 20 | F10.9       |
| 21 | F11.1       |
| 22 | F11.2       |
| 23 | F11.3       |
| 24 | F11.4       |
| 25 | F11.5       |
| 26 | F11.6       |
| 27 | F11.7       |
| 28 | F11.8       |
| 29 | F11.9       |
| 30 | F11.9       |
| 31 | F12.1       |
| 32 | F12.2       |
| 33 | F12.3       |
| 34 | F12.4       |
| 35 | F12.5       |
| 36 | F12.6       |
| 37 | F12.7       |
| 38 | F12.8       |
| 39 | F12.9       |
| 40 | F12.9       |
| 41 | F13.1       |
| 42 | F13.2       |
| 43 | F13.3       |
| 44 | F13.4       |
| 45 | F13.5       |
| 46 | F13.6       |
| 47 | F13.7       |
| 48 | F13.8       |
| 49 | F13.9       |
| 50 | F13.9       |
| 51 | F14.1       |
| 52 | F14.2       |
| 53 | F14.3       |
| 54 | F14.4       |
| 55 | F14.5       |
| 56 | F14.6       |
| 57 | F14.6       |
| 58 | F14.6       |
| 59 | F14.6       |
| 60 | F14.6       |

For peer review only

- 1
- 2 F14.7
- 3 F14.8
- 4 F14.9
- 5 F15.1
- 6 F15.2
- 7 F15.2
- 8 F15.3
- 9 F15.4
- 10 F15.5
- 11 F15.6
- 12 F15.6
- 13 F15.7
- 14 F15.8
- 15 F15.9
- 16 F16.1
- 17 F16.2
- 18 F16.2
- 19 F16.3
- 20 F16.4
- 21 F16.5
- 22 F16.6
- 23 F16.7
- 24 F16.7
- 25 F16.8
- 26 F16.9
- 27 F17.1
- 28 F17.2
- 29 F17.3
- 30 F17.3
- 31 F17.4
- 32 F17.5
- 33 F17.6
- 34 F17.7
- 35 F17.8
- 36 F17.8
- 37 F17.9
- 38 F18.1
- 39 F18.2
- 40 F18.3
- 41 F18.3
- 42 F18.4
- 43 F18.5
- 44 F18.6
- 45 F18.7
- 46 F18.8
- 47 F18.8
- 48 F18.9
- 49 F19.1
- 50 F19.2
- 51 F19.3
- 52 F19.4
- 53 F19.5
- 54 F19.5
- 55 F19.6
- 56 F19.7
- 57 F19.8
- 58 F19.8
- 59 F19.9
- 60 F20.0
- F20.1

For peer review only

1  
2 F20.2  
3 F20.3  
4 F20.4  
5 F20.5  
6 F20.6  
7 F20.8  
8 F20.9  
9 F21  
10 F22.0  
11 F22.8  
12 F22.9  
13 F23.0  
14 F23.1  
15 F23.2  
16 F23.3  
17 F23.8  
18 F23.9  
19 F24  
20 F25.0  
21 F25.1  
22 F25.2  
23 F25.8  
24 F25.9  
25 F28  
26 F29  
27 F30.0  
28 F30.1  
29 F30.2  
30 F30.8  
31 F30.9  
32 F31.0  
33 F31.1  
34 F31.2  
35 F31.3  
36 F31.4  
37 F31.5  
38 F31.6  
39 F31.7  
40 F31.8  
41 F31.9  
42 F32.2  
43 F32.3  
44 F32.8  
45 F32.9  
46 F33.2  
47 F33.3  
48 F33.8  
49 F33.9  
50 F34.0  
51 F34.1  
52  
53  
54  
55  
56  
57  
58  
59  
60

For peer review only

- 1
- 2 F34.8
- 3 F34.9
- 4 F38.0
- 5 F38.1
- 6 F38.8
- 7 F38.8
- 8 F39
- 9 F41.0
- 10 F41.1
- 11 F41.2
- 12 F41.3
- 13 F41.8
- 14 F41.9
- 15 F41.9
- 16 F42.0
- 17 F42.1
- 18 F42.2
- 19 F42.2
- 20 F42.8
- 21 F42.9
- 22 F43.1
- 23 F44.0
- 24 F44.1
- 25 F44.1
- 26 F44.2
- 27 F44.3
- 28 F44.4
- 29 F44.5
- 30 F44.6
- 31 F44.6
- 32 F44.7
- 33 F44.8
- 34 F44.9
- 35 F48.1
- 36 F48.8
- 37 F48.8
- 38 F48.9
- 39 F50.0
- 40 F50.1
- 41 F50.2
- 42 F50.3
- 43 F50.3
- 44 F50.8
- 45 F50.9
- 46 F53.1
- 47 F53.8
- 48 F53.8
- 49 F53.9
- 50
- 51
- 52
- 53
- 54
- 55
- 56
- 57
- 58
- 59
- 60

For peer review only

| 1  | Prodcideid       | Term                                        |
|----|------------------|---------------------------------------------|
| 2  | 840741000033115  | Loxapine 10mg capsules                      |
| 3  | 840841000033113  | Loxapine 25mg capsules                      |
| 4  | 840941000033117  | Loxapine 50mg capsules                      |
| 5  | 842041000033117  | Loxapac 10mg capsules                       |
| 6  | 842141000033118  | Loxapac 25mg capsules                       |
| 7  | 842241000033113  | Loxapac 50mg capsules                       |
| 8  | 923041000033117  | Molipaxin 50mg capsules                     |
| 9  | 923241000033113  | Molipaxin 100mg capsules                    |
| 10 | 929541000033113  | Molipaxin 50mg/5ml oral liquid              |
| 11 | 929841000033110  | Molipaxin CR 150mg tablets                  |
| 12 | 938741000033111  | Molipaxin 150mg tablets                     |
| 13 | 498441000033112  | Efexor XL 75mg capsules                     |
| 14 | 498541000033113  | Efexor XL 150mg capsules                    |
| 15 | 499041000033111  | Efexor 37.5mg tablets                       |
| 16 | 499141000033110  | Efexor 75mg tablets                         |
| 17 | 499241000033115  | Efexor 50mg tablets                         |
| 18 | 1509241000033110 | Venlafaxine 150mg modified-release capsules |
| 19 | 1509341000033117 | Venlafaxine 75mg modified-release capsules  |
| 20 | 1512241000033119 | Venlafaxine 37.5mg tablets                  |
| 21 | 1512341000033112 | Venlafaxine 75mg tablets                    |
| 22 | 1512441000033118 | Venlafaxine 50mg tablets                    |
| 23 | 4498541000033116 | Venlafaxine 37.5mg/5ml oral suspension      |
| 24 | 4823541000033110 | Venlafaxine 75mg modified-release tablets   |
| 25 | 4823641000033111 | Venlafaxine 150mg modified-release tablets  |
| 26 | 4823741000033119 | ViePax XL 75mg tablets                      |
| 27 | 4823841000033112 | ViePax XL 150mg tablets                     |
| 28 | 4896941000033117 | ViePax 75mg tablets                         |
| 29 | 4897041000033116 | ViePax 37.5mg tablets                       |
| 30 | 4899541000033115 | Vensir XL 75mg capsules                     |
| 31 | 4899641000033119 | Vensir XL 150mg capsules                    |
| 32 | 4936641000033111 | Venaxx XL 75mg capsules                     |
| 33 | 4936741000033119 | Venaxx XL 150mg capsules                    |
| 34 | 4957841000033111 | Politid XL 75mg capsules                    |
| 35 | 4957941000033115 | Politid XL 150mg capsules                   |
| 36 | 5008041000033112 | Venlafaxine 75mg/5ml oral solution          |
| 37 | 5052741000033119 | Venlafaxine 225mg modified-release tablets  |
| 38 | 5052841000033112 | Venlalic XL 225mg tablets                   |
| 39 | 5052941000033116 | Venlalic XL 150mg tablets                   |
| 40 | 5053041000033114 | Venlalic XL 75mg tablets                    |
| 41 | 5812541000033115 | Venlablue XL 75mg capsules                  |
| 42 | 5812641000033119 | Venlablue XL 150mg capsules                 |
| 43 | 5813141000033117 | Alventa XL 150mg capsules                   |
| 44 | 5813341000033119 | Alventa XL 75mg capsules                    |
| 45 | 5896341000033112 | Depefex XL 75mg capsules                    |
| 46 | 5896441000033118 | Depefex XL 150mg capsules                   |
| 47 | 6000441000033115 | Venlafaxine 37.5mg/5ml oral solution        |
| 48 | 6029641000033116 | Venlaneo XL 150mg capsules                  |
| 49 | 6029741000033113 | Venlaneo XL 75mg capsules                   |
| 50 | 6161741000033111 | Venlafaxine 37.5mg modified-release tablets |

|    |                   |                                                 |
|----|-------------------|-------------------------------------------------|
| 1  |                   |                                                 |
| 2  | 6161841000033118  | Venlalic XL 37.5mg tablets                      |
| 3  | 8298641000033115  | Sunveniz XL 150mg tablets                       |
| 4  | 8298741000033112  | Sunveniz XL 75mg tablets                        |
| 5  | 8867941000033118  | Venlafaxine 75mg/5ml oral suspension            |
| 6  | 8885441000033118  | Venlafaxine 37.5mg modified-release capsules    |
| 7  | 8885541000033117  | Venlablue XL 37.5mg capsules                    |
| 8  |                   |                                                 |
| 9  | 10730041000033110 | Venlafaxine 225mg modified-release capsules     |
| 10 | 10730141000033114 | Efexor XL 225mg capsules                        |
| 11 | 11693641000033117 | Vensir XL 225mg capsules                        |
| 12 |                   |                                                 |
| 13 | 12194541000033118 | Vencarm XL 150mg capsules                       |
| 14 | 12194641000033117 | Vencarm XL 225mg capsules                       |
| 15 | 12194741000033114 | Vencarm XL 37.5mg capsules                      |
| 16 | 12194841000033116 | Vencarm XL 75mg capsules                        |
| 17 | 12389941000033119 | Venlasov XL 75mg capsules                       |
| 18 |                   |                                                 |
| 19 | 12390341000033114 | Venlasov XL 150mg capsules                      |
| 20 | 12605341000033111 | Venladex XL 75mg tablets                        |
| 21 | 12605441000033117 | Venladex XL 150mg tablets                       |
| 22 | 12605541000033116 | Venladex XL 225mg tablets                       |
| 23 | 12641541000033113 | Venzip XL 150mg capsules                        |
| 24 | 12641641000033114 | Venzip XL 75mg capsules                         |
| 25 |                   |                                                 |
| 26 | 12901141000033114 | Majoven XL 75mg capsules                        |
| 27 | 12901241000033119 | Majoven XL 150mg capsules                       |
| 28 | 13318341000033119 | Venlafaxine 300mg modified-release tablets      |
| 29 | 13318441000033113 | Venlalic XL 300mg tablets                       |
| 30 |                   |                                                 |
| 31 | 13916241000033115 | Venlafaxine 37.5mg/5ml oral solution sugar free |
| 32 | 13916341000033113 | Venlafaxine 75mg/5ml oral solution sugar free   |
| 33 | 60941000033114    | Amoxapine 50mg tablets                          |
| 34 | 61041000033116    | Amoxapine 100mg tablets                         |
| 35 | 87641000033116    | Asendis 100mg tablets                           |
| 36 | 87941000033111    | Asendis 50mg tablets                            |
| 37 |                   |                                                 |
| 38 | 60841000033118    |                                                 |
| 39 | 61141000033117    |                                                 |
| 40 | 87741000033113    |                                                 |
| 41 | 87841000033115    |                                                 |
| 42 |                   |                                                 |
| 43 | 173741000033115   |                                                 |
| 44 | 558041000033118   |                                                 |
| 45 | 558141000033119   |                                                 |
| 46 | 262041000033115   | Clomipramine 10mg capsules                      |
| 47 | 262141000033116   | Clomipramine 25mg capsules                      |
| 48 | 262241000033111   | Clomipramine 50mg capsules                      |
| 49 | 284741000033110   | Clomipramine 25mg/5ml oral solution             |
| 50 | 285741000033111   | Clomipramine 75mg modified-release tablets      |
| 51 | 4431541000033115  | Clomipramine 50mg/5ml oral suspension           |
| 52 |                   |                                                 |
| 53 | 275441000033113   |                                                 |
| 54 | 430141000033112   |                                                 |
| 55 | 1066541000033115  |                                                 |
| 56 | 472141000033110   | Dothapax 25 capsules                            |
| 57 | 479641000033111   | Dothapax 75 tablets                             |
| 58 |                   |                                                 |
| 59 | 1111541000033117  | Prothiaden 25mg capsules                        |
| 60 | 1111641000033116  | Prepadine 25mg capsules                         |

|    |                   |                                                |
|----|-------------------|------------------------------------------------|
| 1  |                   |                                                |
| 2  | 1135541000033110  | Prothiaden 75mg tablets                        |
| 3  | 1135941000033116  | Prepadine 75mg tablets                         |
| 4  | 3088941000033118  | Dosulepin 25mg capsules                        |
| 5  | 3089041000033110  | Dosulepin 75mg tablets                         |
| 6  |                   |                                                |
| 7  | 3089141000033114  | Dosulepin 25mg/5ml oral solution               |
| 8  | 3089241000033119  | Dosulepin 75mg/5ml oral solution               |
| 9  | 5891041000033116  | Dosulepin 25mg/5ml oral suspension             |
| 10 | 5992241000033114  | Dosulepin 75mg/5ml oral suspension             |
| 11 | 473041000033119   | Doxepin 10mg capsules                          |
| 12 | 473141000033115   | Doxepin 25mg capsules                          |
| 13 | 473241000033110   | Doxepin 50mg capsules                          |
| 14 | 473341000033117   | Doxepin 75mg capsules                          |
| 15 |                   |                                                |
| 16 | 1294541000033115  | Sinequan 10mg capsules                         |
| 17 | 1294641000033119  | Sinequan 25mg capsules                         |
| 18 | 1294741000033111  | Sinequan 50mg capsules                         |
| 19 | 1294841000033118  | Sinequan 75mg capsules                         |
| 20 | 1603341000033112  | Doxepin 5% cream                               |
| 21 | 1712041000033111  | Xepin 5% cream                                 |
| 22 |                   |                                                |
| 23 | 4010441000033114  | Sinepin 25mg capsules                          |
| 24 | 4010541000033110  | Sinepin 50mg capsules                          |
| 25 | 4954041000033114  | Doxepin 50mg/5ml oral solution                 |
| 26 | 749541000033115   |                                                |
| 27 | 896541000033118   |                                                |
| 28 |                   |                                                |
| 29 | 754241000033115   | Imipramine 25mg tablets                        |
| 30 | 755541000033119   | Imipramine 10mg tablets                        |
| 31 | 1389441000033112  | Surmontil 50mg capsules                        |
| 32 | 1396741000033112  | Surmontil 10mg tablets                         |
| 33 | 1396841000033119  | Surmontil 25mg tablets                         |
| 34 | 1449441000033113  | Tofranil 25mg/5ml syrup                        |
| 35 | 1450841000033117  | Tofranil 25mg tablets                          |
| 36 | 1454741000033115  | Trimipramine 50mg capsules                     |
| 37 | 1471341000033116  | Trimipramine 10mg tablets                      |
| 38 | 1471441000033110  | Trimipramine 25mg tablets                      |
| 39 | 5328741000033117  | Imipramine 25mg/5ml oral solution              |
| 40 | 5454141000033118  | Imipramine 25mg/5ml oral solution sugar free   |
| 41 | 626241000033115   | Gamanil 70mg tablets                           |
| 42 | 849241000033115   | Lofepamine 70mg/5ml oral suspension sugar free |
| 43 | 850141000033116   | Lofepamine 70mg tablets                        |
| 44 | 2078841000033114  | Lomont 70mg/5ml oral suspension                |
| 45 | 2215541000033118  | Feprapax 70mg tablets                          |
| 46 | 5996641000033111  | Lofepamine 70mg/5ml oral solution              |
| 47 | 5996741000033119  | Lofepamine 70mg/5ml oral suspension            |
| 48 | 1454641000033112  | Trazodone 50mg capsules                        |
| 49 | 1455241000033113  | Trazodone 100mg capsules                       |
| 50 | 1461941000033113  | Trazodone 50mg/5ml oral solution sugar free    |
| 51 | 1462241000033110  | Trazodone 150mg modified-release tablets       |
| 52 | 1473641000033113  | Trazodone 150mg tablets                        |
| 53 | 12476541000033119 | Trazodone 100mg/5ml oral solution sugar free   |
| 54 | 13444241000033119 | Trazodone 50mg tablets                         |
| 55 | 13444341000033112 | Trazodone 100mg tablets                        |
| 56 |                   |                                                |
| 57 |                   |                                                |
| 58 |                   |                                                |
| 59 |                   |                                                |
| 60 |                   |                                                |



|    |                   |                                                                   |
|----|-------------------|-------------------------------------------------------------------|
| 1  |                   |                                                                   |
| 2  | 787141000033110   | Isocarboxazid 10mg tablets                                        |
| 3  | 870041000033117   |                                                                   |
| 4  | 868841000033115   | Manerix 150mg tablets                                             |
| 5  | 868941000033111   | Manerix 300mg tablets                                             |
| 6  |                   |                                                                   |
| 7  | 937241000033118   | Moclobemide 150mg tablets                                         |
| 8  | 937841000033119   | Moclobemide 300mg tablets                                         |
| 9  | 955241000033110   | Nardil 15mg tablets                                               |
| 10 | 1079341000033111  | Phenelzine 15mg tablets                                           |
| 11 | 13719241000033117 | Phenelzine 15mg capsules                                          |
| 12 |                   |                                                                   |
| 13 | 13747441000033117 | Phenelzine 15mg capsules                                          |
| 14 | 13747541000033116 | Phenelzine 15mg capsules                                          |
| 15 | 1469441000033116  | Tranylcypromine 10mg tablets                                      |
| 16 | 1040841000033112  |                                                                   |
| 17 | 5077041000033116  | Agomelatine 25mg tablets                                          |
| 18 | 5077141000033117  | Valdoxan 25mg tablets                                             |
| 19 |                   |                                                                   |
| 20 | 12470041000033110 | Comfizz Level I waistband with silicone grip extra large/XX large |
| 21 | 489741000033113   | Dutonin 100mg tablets                                             |
| 22 | 489841000033115   | Dutonin 200mg tablets                                             |
| 23 | 966141000033116   | Nefazodone 100mg tablets                                          |
| 24 |                   |                                                                   |
| 25 | 966241000033111   | Nefazodone 200mg tablets                                          |
| 26 | 490041000033118   | Dutonin tablets treatment initiation pack                         |
| 27 | 496741000033118   | Edronax 4mg tablets                                               |
| 28 | 10616941000033112 | Vortioxetine 5mg tablets                                          |
| 29 | 10617041000033113 | Vortioxetine 10mg tablets                                         |
| 30 |                   |                                                                   |
| 31 | 10617141000033112 | Vortioxetine 20mg tablets                                         |
| 32 | 10617241000033117 | Brintellix 5mg tablets                                            |
| 33 | 10617341000033110 | Brintellix 10mg tablets                                           |
| 34 | 10617441000033116 | Brintellix 20mg tablets                                           |
| 35 |                   |                                                                   |
| 36 |                   |                                                                   |
| 37 |                   |                                                                   |
| 38 |                   |                                                                   |
| 39 |                   |                                                                   |
| 40 |                   |                                                                   |
| 41 |                   |                                                                   |
| 42 |                   |                                                                   |
| 43 |                   |                                                                   |
| 44 |                   |                                                                   |
| 45 |                   |                                                                   |
| 46 |                   |                                                                   |
| 47 |                   |                                                                   |
| 48 |                   |                                                                   |
| 49 |                   |                                                                   |
| 50 |                   |                                                                   |
| 51 |                   |                                                                   |
| 52 |                   |                                                                   |
| 53 |                   |                                                                   |
| 54 |                   |                                                                   |
| 55 |                   |                                                                   |
| 56 |                   |                                                                   |
| 57 |                   |                                                                   |
| 58 |                   |                                                                   |
| 59 |                   |                                                                   |
| 60 |                   |                                                                   |

| 1  | Medcodeid         | Term                                                     |
|----|-------------------|----------------------------------------------------------|
| 2  | 71184010          | Nursing home                                             |
| 3  | 248842015         | Nursing home attendant                                   |
| 4  | 250560019         | Lives in a nursing home                                  |
| 5  | 285209012         | Seen in nursing home                                     |
| 6  | 449801010         | Discharge to nursing home                                |
| 7  | 1488499011        | Other residential care homes managed by local authority  |
| 8  | 1488500019        | Other residential care home man voluntary/private agents |
| 9  | 62241000000112    | Nursing home visit note                                  |
| 10 | 296261000006113   | Nursing home birth                                       |
| 11 | 296351000006117   | Nursing or other home                                    |
| 12 | 406371000000117   | Lives in care home                                       |
| 13 | 530521000000114   | Provision of continuing care in nursing home             |
| 14 | 1009771000006114  | Lives in a registered adult care home                    |
| 15 | 1552711000000110  | Patient died in care home                                |
| 16 | 1583741000006116  | Provision of continuing care in nursing home             |
| 17 | 1692851000000118  | Admission to nursing home                                |
| 18 | 1775751000006110  | Source of community referral: Care Home                  |
| 19 | 1777721000006111  | Activity location: Residential Care Home                 |
| 20 | 1777731000006114  | Activity location: Nursing Home                          |
| 21 | 1872341000006118  | Accom status - mental health registered care home        |
| 22 | 1872471000006118  | Accom status - non-mental health registered care home    |
| 23 | 1872581000006116  | Accom status - nursing home for older persons            |
| 24 | 1920601000006115  | Care home visit for annual patient review                |
| 25 | 1920611000006117  | Care home visit for mid-year patient review              |
| 26 | 1920731000006119  | Weekly care home ward round                              |
| 27 | 1951031000006114  | Discharge to care home                                   |
| 28 | 1961541000006115  | Referred by care home                                    |
| 29 | 2290511000000115  | Care home visit                                          |
| 30 | 2290551000000116  | Care home visit for initial patient assessment           |
| 31 | 2290591000000112  | Care home visit for follow-up patient review             |
| 32 | 2340151000000110  | Care home enhanced services administration               |
| 33 | 2587751000000117  | Referred by care home                                    |
| 34 | 3187751000006110  | NH - Nursing home                                        |
| 35 | 5959551000006111  | Discharge to private nursing home                        |
| 36 | 5997731000006114  | Private nursing home                                     |
| 37 | 7224961000006115  | Fall in nursing home                                     |
| 38 | 8053871000006115  | Provision of nursing home care                           |
| 39 | 8074901000006115  | Patient transfer to nursing home                         |
| 40 | 12738601000006111 | Seen by clinical pharmacist in care home                 |
| 41 | 13072971000006116 | Living temporarily in care home                          |
| 42 |                   |                                                          |
| 43 |                   |                                                          |
| 44 |                   |                                                          |
| 45 |                   |                                                          |
| 46 |                   |                                                          |
| 47 |                   |                                                          |
| 48 |                   |                                                          |
| 49 |                   |                                                          |
| 50 |                   |                                                          |
| 51 |                   |                                                          |
| 52 |                   |                                                          |
| 53 |                   |                                                          |
| 54 |                   |                                                          |
| 55 |                   |                                                          |
| 56 |                   |                                                          |
| 57 |                   |                                                          |
| 58 |                   |                                                          |
| 59 |                   |                                                          |
| 60 |                   |                                                          |

1 Andersen et al (2023)

2 Classification as written in Green Book, chapter 14a

3  
4 Chronic respiratory disease – individuals with a severe lung condition: poorly controlled asthma, chronic  
5 obstructive pulmonary disease including chronic bronchitis and emphysema, bronchiectasis, cystic fibrosis,  
6 interstitial lung fibrosis, pneumoconiosis, bronchopulmonary dysplasia

7  
8 complications, chronic heart failure, individuals requiring regular medication and/or follow-up for ischaemic  
9 heart disease (includes individuals with atrial fibrillation, peripheral vascular disease or a history of venous  
10 thromboembolism)

11 Chronic kidney disease: at stage 3-5, chronic kidney failure, nephrotic syndrome, kidney transplantation

12 Chronic liver disease: chronic hepatitis, cirrhosis, biliary atresia

13  
14 function may be compromised due to neurological or neuromuscular disease (e.g. polio syndrome sufferers),  
15 cerebral palsy, severe or profound and multiple learning disabilities (PMLD) including all those on the  
16 learning disability register, Down's syndrome, multiple sclerosis, epilepsy, dementia, Parkinson's disease,  
17 motor neurone disease and related or similar conditions, hereditary and degenerative disease of the nervous  
18 system or muscles, severe neurological disability

19  
20 Diabetes mellitus and other endocrine disorders: any diabetes, diet controlled diabetes, current gestational  
21 diabetes, Addison's diabetes

22  
23 immunosuppression due to disease or treatment: patients undergoing chemotherapy leading to  
24 immunosuppression, patients undergoing radical radiotherapy, solid organ transplant recipients, bone  
25 marrow or stem cell transplant recipients, HIV infection at all stages, multiple myeloma or genetic disorders  
26 affecting the immune system (e.g. IRAK-4, NEMO, complement disorder, SCID), individuals who are receiving  
27 immunosuppressive or immunomodulating biological therapy including, but not limited to, anti-TNF,  
28 alemtuzumab, ofatumumab, rituximab, patients receiving protein kinase inhibitors or PARP inhibitors, and  
29 individuals treated with steroid sparing agents such as cyclophosphamide and mycophenolate mofetil,  
30 individuals treated with or likely to be treated with systemic steroids for more than a month at a dose  
31 equivalent to prednisolone at 20mg or more per day for adults, anyone with a history of haematological  
32 malignancy, including leukaemia, lymphoma, and myeloma, those who require long term  
33 immunosuppressive treatment for conditions including but not limited to: systemic lupus erythematosus,

34  
35 Asplenia or dysfunction of the spleen: asplenia, homozygous sickle cell disease, thalassaemia major, coeliac syn  
36 Morbid obesity (>40 kg/m<sup>2</sup>)

37  
38 Severe mental illness: schizophrenia, bipolar disorder, any mental illness that causes severe functional impairn  
39  
40 Pregnancy: pregnancy or end of pregnancy

41  
42 Description of sheet abbreviations:

43 hsa\_ to reflect UK Health Security Agency clinical risk criteria code list

44 \_XX\_ to reflect the concept

45 \_\_m to reflect medcodeid, \_icd to reflect ICD-10 codes, \_p to reflect procodeid or \_opcs to reflect OPCS proc

46  
47  
48 Format of sheets:

49 medcodeid and procodeid are stored as text, not integers, as per CPRD suggestions.  
50  
51  
52  
53  
54  
55  
56  
57  
58  
59  
60

1  
2  
3 Medcodeid list ICD-10 code list Prodcodeid list OPCS code list  
4  
5  
6

7 hsa\_res\_m hsa\_res\_icd hsa\_res\_p X  
8  
9

10 hsa\_hv\_m hsa\_hv\_icd X X  
11

12 hsa\_ren\_m hsa\_ren\_icd X X  
13

14 hsa\_liv\_m hsa\_liv\_icd X X  
15  
16  
17  
18

19 hsa\_neu\_m hsa\_neu\_icd X X  
20

21 hsa\_dme\_m hsa\_dme\_icd X X  
22  
23  
24  
25  
26  
27  
28  
29  
30  
31  
32  
33

34  
35 hsa\_imm\_m hsa\_imm\_icd hsa\_imm\_p hsa\_imm\_opcs  
36

37 hsa\_asp\_m hsa\_asp\_icd X X  
38

39 hsa\_obe\_m hsa\_obe\_icd X X  
40

41 hsa\_men\_m hsa\_men\_icd X X  
42

43 hsa\_pre\_m hsa\_pre\_m X X  
44  
45

46 e list  
47  
48  
49  
50  
51  
52  
53  
54  
55  
56  
57  
58  
59  
60

| 1  | Medcodeid         | Term                                                                |
|----|-------------------|---------------------------------------------------------------------|
| 2  | 105519017         | Chronic bronchitis                                                  |
| 3  | 123588010         | Mucopurulent chronic bronchitis                                     |
| 4  | 139979010         | Fetid chronic bronchitis                                            |
| 5  | 285104011         | Obstructive chronic bronchitis                                      |
| 6  | 301444018         | Simple chronic bronchitis NOS                                       |
| 7  | 301448015         | Mucopurulent chronic bronchitis NOS                                 |
| 8  | 301450011         | Chronic asthmatic bronchitis                                        |
| 9  | 301451010         | Chronic wheezy bronchitis                                           |
| 10 | 301455018         | Obstructive chronic bronchitis NOS                                  |
| 11 | 301456017         | Mixed simple and mucopurulent chronic bronchitis                    |
| 12 | 301457014         | Other chronic bronchitis                                            |
| 13 | 301458016         | Other chronic bronchitis NOS                                        |
| 14 | 301459012         | Chronic bronchitis NOS                                              |
| 15 | 506053014         | Purulent chronic bronchitis                                         |
| 16 | 508561017         | Simple chronic bronchitis                                           |
| 17 | 508562012         | Chronic catarrhal bronchitis                                        |
| 18 | 851261000006116   | Chronic bronchitis, acute exac                                      |
| 19 | 3873191000006110  | Fetid chronic bronchitis                                            |
| 20 | 4733031000006114  | Chronic obstructive bronchitis                                      |
| 21 | 7958721000006119  | Chronic suppuration of bronchus                                     |
| 22 | 8033221000006118  | Chronic obstructive lung disease co-occurrent with acute bronchitis |
| 23 | 8090191000006114  | Acute exacerbation of chronic obstructive bronchitis                |
| 24 | 13651461000006115 | Chronic bronchitis co-occurrent with wheeze                         |
| 25 | 7462014           | Subcutaneous emphysema                                              |
| 26 | 9337016           | Panlobular emphysema                                                |
| 27 | 19421011          | Interstitial pulmonary emphysema                                    |
| 28 | 27096010          | Giant bullous emphysema                                             |
| 29 | 53589018          | Acute emphysematous cholecystitis                                   |
| 30 | 90243017          | Traumatic subcutaneous emphysema                                    |
| 31 | 99889013          | Perinatal interstitial emphysema                                    |
| 32 | 113497011         | Centrilobular emphysema                                             |
| 33 | 285100019         | Emphysematous bronchitis                                            |
| 34 | 301460019         | Chronic bullous emphysema                                           |
| 35 | 301463017         | Segmental bullous emphysema                                         |
| 36 | 301464011         | Zonal bullous emphysema                                             |
| 37 | 301468014         | Chronic bullous emphysema NOS                                       |
| 38 | 301469018         | Other emphysema                                                     |
| 39 | 301470017         | Acute vesicular emphysema                                           |
| 40 | 301477019         | Emphysema NOS                                                       |
| 41 | 301572010         | Chronic emphysema due to chemical fumes                             |
| 42 | 301835010         | [X]Other emphysema                                                  |
| 43 | 316340019         | Perinatal interstitial emphysema and related conditions             |
| 44 | 316342010         | Perinatal interstitial emphysema or related condition NOS           |
| 45 | 396108018         | Bullous emphysema with collapse                                     |
| 46 | 396109014         | Atrophic (senile) emphysema                                         |
| 47 | 396110016         | Other emphysema NOS                                                 |
| 48 | 1230190015        | MacLeod's unilateral emphysema                                      |
| 49 | 640491000006111   | Pulmonary emphysema                                                 |
| 50 | 909721000006115   | [RFC] Emphysema                                                     |

|    |                   |                                                        |
|----|-------------------|--------------------------------------------------------|
| 1  |                   |                                                        |
| 2  | 2767261000006118  | Mediastinal emphysema                                  |
| 3  | 2767421000006111  | Obstructive emphysema                                  |
| 4  | 3013821000006114  | Subpleural emphysema                                   |
| 5  | 3228301000006115  | Unilateral emphysema                                   |
| 6  | 3295361000006115  | Emphysema                                              |
| 7  | 3589231000006114  | Congenital lobar emphysema                             |
| 8  | 3764021000006117  | Interstitial emphysema of lung                         |
| 9  | 3921361000006112  | Emphysema of lung                                      |
| 10 | 4374681000006116  | Chronic emphysema                                      |
| 11 | 4781461000006117  | Emphysematous bulla                                    |
| 12 | 5054271000006111  | Pulmonary emphysema in alpha-1 PI deficiency           |
| 13 | 7627141000006111  | Pulmonary emphysema co-occurrent with fibrosis of lung |
| 14 | 7627151000006113  | CPFE - combined pulmonary fibrosis and emphysema       |
| 15 | 14161371000006110 | Emphysema of left lung                                 |
| 16 | 14161381000006113 | Emphysema of right lung                                |
| 17 | 21163015          | Bronchiectasis                                         |
| 18 | 38677017          | Tuberculous bronchiectasis                             |
| 19 | 128792019         | Congenital bronchiectasis                              |
| 20 | 301524014         | Recurrent bronchiectasis                               |
| 21 | 301525010         | Post-infective bronchiectasis                          |
| 22 | 301526011         | Bronchiectasis NOS                                     |
| 23 | 1854831000006111  | Cystic fibrosis manifested by bronchiectasis           |
| 24 | 2404941000000118  | H/O: bronchiectasis                                    |
| 25 | 2806691000006111  | Traction bronchiectasis                                |
| 26 | 2867041000006113  | Post-tuberculous bronchiectasis                        |
| 27 | 3327421000006113  | Adult bronchiectasis                                   |
| 28 | 3858081000006116  | Cylindrical bronchiectasis                             |
| 29 | 5053671000006110  | Acquired bronchiectasis                                |
| 30 | 5053681000006113  | Idiopathic bronchiectasis                              |
| 31 | 5053691000006111  | Obstructive bronchiectasis                             |
| 32 | 14133001000006111 | Exacerbation of bronchiectasis caused by infection     |
| 33 | 24973018          | Bauxite fibrosis of lung                               |
| 34 | 29395011          | Graphite fibrosis of lung                              |
| 35 | 85960018          | Pulmonary fibrosis                                     |
| 36 | 149374011         | Tuberculous fibrosis of lung                           |
| 37 | 254002014         | O/E - fibrosis of lung                                 |
| 38 | 254003016         | O/E - fibrosis of lung present                         |
| 39 | 301575012         | Chronic pulmonary fibrosis due to chemical fumes       |
| 40 | 301852014         | [X]Other interstitial pulmonary diseases with fibrosis |
| 41 | 1225197013        | Pfeiffer's disease                                     |
| 42 | 207831000006116   | Interstitial pulmonary fibrosis of prematurity         |
| 43 | 211391000006118   | Post-inflammatory pulmonary fibrosis                   |
| 44 | 230471000006112   | Pfeiffer's disease                                     |
| 45 | 556271000006115   | Chronic radiation pulmonary fibrosis                   |
| 46 | 606441000006110   | Cystic fibrosis of the lung                            |
| 47 | 621121000006112   | Diffuse interstitial pulmonary fibrosis                |
| 48 | 885431000006115   | Radiation lung fibrosis                                |
| 49 | 885491000006116   | Pulmonary fibrosis                                     |
| 50 | 909731000006117   | [RFC] Pulmonary fibrosis                               |
| 51 | 1786131000006116  | Idiopathic pulmonary fibrosis                          |

|    |                   |                                                          |
|----|-------------------|----------------------------------------------------------|
| 1  |                   |                                                          |
| 2  | 2732761000006118  | Bauxite fibrosis of lung                                 |
| 3  | 3154151000006111  | Massive silicotic fibrosis of lung                       |
| 4  | 3336391000006117  | Fibrosis of lung                                         |
| 5  | 3423211000006118  | Massive fibrosis of lung                                 |
| 6  | 3657901000006117  | Fibrosis of lung following radiation                     |
| 7  | 3907561000006119  | Pulmonary cystic fibrosis                                |
| 8  | 5054951000006111  | Localised pulmonary fibrosis                             |
| 9  | 7059121000006115  | Familial idiopathic pulmonary fibrosis                   |
| 10 | 7532731000006111  | Chronic idiopathic pulmonary fibrosis                    |
| 11 | 7635751000006118  | Acute idiopathic pulmonary fibrosis                      |
| 12 | 13777461000006118 | Fibrosis of lung caused by radiation                     |
| 13 | 37941013          | Asbestosis                                               |
| 14 | 49227017          | Coal workers' pneumoconiosis                             |
| 15 | 83019014          | Complicated silicosis                                    |
| 16 | 121482015         | Talc pneumoconiosis                                      |
| 17 | 301552017         | Asbestosis NOS                                           |
| 18 | 301556019         | Silica pneumoconiosis NOS                                |
| 19 | 301557011         | Pneumoconiosis due to inorganic dust                     |
| 20 | 301558018         | Pneumoconiosis due to inorganic dust NOS                 |
| 21 | 301562012         | Pneumoconiosis                                           |
| 22 | 301563019         | Pneumoconiosis associated with tuberculosis              |
| 23 | 301838012         | [X]Pneumoconiosis due to other dust containing silica    |
| 24 | 301839016         | [X]Pneumoconiosis due to other specified inorganic dusts |
| 25 | 350121013         | Pleural plaque disease due to asbestosis                 |
| 26 | 141591000006118   | Silica and silicate pneumoconiosis                       |
| 27 | 219651000006116   | Pneumoconioses                                           |
| 28 | 885331000006110   | Coalworker's pneumoconiosis                              |
| 29 | 907501000006111   | [RFC] Pneumoconiosis                                     |
| 30 | 2511231000006117  | Pneumoconiosis due to silica                             |
| 31 | 2860341000006111  | Asbestos pneumoconiosis                                  |
| 32 | 2860351000006113  | Pulmonary asbestosis                                     |
| 33 | 3513801000006119  | Iron pneumoconiosis                                      |
| 34 | 3689711000006118  | Pneumoconiosis due to talc                               |
| 35 | 5055241000006116  | Complicated pneumoconiosis                               |
| 36 | 500770015         | Perinatal bronchopulmonary dysplasia                     |
| 37 | 1079231000006110  | Adverse reaction to Bdp                                  |
| 38 | 3598991000006113  | Bronchopulmonary dysplasia of newborn                    |
| 39 | 3599001000006113  | Bronchopulmonary dysplasia                               |
| 40 | 3599031000006117  | BPD - Bronchopulmonary dysplasia                         |
| 41 | 11932331000006115 | copd gold group a                                        |
| 42 | 11932341000006113 | copd gold group b                                        |
| 43 | 11932351000006110 | copd gold group c                                        |
| 44 | 11932361000006112 | copd gold group d                                        |
| 45 | 1222334016        | other specified chronic obstructive pulmonary disease    |
| 46 | 1222335015        | chronic obstructive pulmonary disease nos                |
| 47 | 12489801000006116 | admit copd emergency                                     |
| 48 | 12728161000006116 | chronic obstructive airways disease nos                  |
| 49 | 12759361000006112 | chronic obstructive pulmonary disease nos                |
| 50 | 1488423019        | chronic obstructive pulmonary disease follow-up          |
| 51 | 1488424013        | chronic obstructive pulmonary disease annual review      |



|    |                  |                                                                                |
|----|------------------|--------------------------------------------------------------------------------|
| 1  |                  |                                                                                |
| 2  | 1494601017       | coad follow-up                                                                 |
| 3  | 1683181000000112 | chronic obstructive pulmonary disease 3 monthly review                         |
| 4  | 1683221000000119 | chronic obstructive pulmonary disease 6 monthly review                         |
| 5  | 1699821000006113 | at risk of chronic obstructive pulmonary diseas exacerbation                   |
| 6  | 1765681000000110 | history of chronic obstructive pulmonary disease                               |
| 7  | 1771201000006116 | chronic obstructive pulmonary disease multidisciplinary review                 |
| 8  | 1783891000006115 | chronic obstructiv pulmonary disease medication optimisation                   |
| 9  | 1811661000006110 | copd self-management plan agreed                                               |
| 10 | 1811741000006117 | copd self-management plan review                                               |
| 11 | 1823851000006119 | chronic obstructive pulmonary disease confirmed                                |
| 12 | 1823851000006119 | chronic obstructive pulmonary disease confirmed                                |
| 13 | 1823851000006119 | chronic obstructive pulmonary disease confirmed                                |
| 14 | 1882421000006113 | 1 copd exacerbation in past year                                               |
| 15 | 1882431000006111 | 3+ copd exacerbations in past year                                             |
| 16 | 1882441000006118 | 2 copd exacerbations in past year                                              |
| 17 | 1882451000006116 | no copd exacerbations in past year                                             |
| 18 | 1948051000006112 | asthma-chronic obstructive pulmonary disease overlap syndrom                   |
| 19 | 2009451000006113 | chronic obstructive pulmonary disease post discharge review                    |
| 20 | 2009451000006113 | chronic obstructive pulmonary disease post discharge review                    |
| 21 | 2010061000006113 | acute non-infective exacerbation of chronic obstructive pulmonary disease      |
| 22 | 2152091000000112 | has chronic obstructive pulmonary disease care plan                            |
| 23 | 301539010        | other specified chronic obstructive airways disease                            |
| 24 | 301539010        | other specified chronic obstructive airways disease                            |
| 25 | 301545019        | chronic obstructive airways disease nos                                        |
| 26 | 301836011        | [x]other specified chronic obstructive pulmonary disease                       |
| 27 | 516801000000112  | very severe chronic obstructive pulmonary disease                              |
| 28 | 553211000006119  | chron obstruct pulmonary dis wth acute exacerbation, unspec                    |
| 29 | 555461000006119  | chronic obstruct pulmonary dis with acute lower resp infectn                   |
| 30 | 555461000006119  | chronic obstruct pulmonary dis with acute lower resp infectn                   |
| 31 | 555471000006114  | chronic obstructive airways disease                                            |
| 32 | 6763231000006119 | emergency hospital admission for chronic obstructive pulmonary disease         |
| 33 | 6763251000006114 | emergency hospital admission for copd (chronic obstructive pulmonary disease)  |
| 34 | 8058301000006110 | copd (chronic obstructive pulmonary disease) disturbs sleep                    |
| 35 | 8058321000006117 | copd (chronic obstructive pulmonary disease) does not disturb sleep            |
| 36 | 8125721000006119 | at risk of copd (chronic obstructive pulmonary disease) exacerbation           |
| 37 | 8125721000006119 | at risk of copd (chronic obstructive pulmonary disease) exacerbation           |
| 38 | 8235101000006114 | copd (chronic obstructive pulmonary disease) 3 monthly review                  |
| 39 | 8235131000006118 | copd (chronic obstructive pulmonary disease) 6 monthly review                  |
| 40 | 8260631000006112 | copd (chronic obstructive pulmonary disease) self-management plan review       |
| 41 | 8260631000006112 | copd (chronic obstructive pulmonary disease) self-management plan review       |
| 42 | 8287171000006115 | acute non-infective exacerbation of copd (chronic obstructive pulmonary diseas |
| 43 | 909711000006111  | [rfc] chronic obstructive pulmonary disease (copd)                             |
| 44 | 9317341000006115 | acos - asthma-chronic obstructive pulmonary disease overlap syndrome           |
| 45 | 966841000006111  | chronic obstructive pulmonary disease clini management plan                    |
| 46 | 977891000006112  | copd accident and emergency attendance since last visit                        |
| 47 | 977901000006111  | emergency copd admission since last appointment                                |
| 48 | 977901000006111  | emergency copd admission since last appointment                                |
| 49 | 977911000006114  | number of copd exacerbations in past year                                      |
| 50 | 990641000006110  | chronic obst. pulm. dis. nos                                                   |
| 51 | 990651000006112  | chr. airway obstruction nos                                                    |
| 52 | 998281000006115  | multiple copd emergency hospital admissions                                    |
| 53 |                  |                                                                                |
| 54 |                  |                                                                                |
| 55 |                  |                                                                                |
| 56 |                  |                                                                                |
| 57 |                  |                                                                                |
| 58 |                  |                                                                                |
| 59 |                  |                                                                                |
| 60 |                  |                                                                                |



1  
2  
3  
4  
5  
6  
7  
8  
9  
10  
11  
12  
13  
14  
15  
16  
17  
18  
19  
20  
21  
22  
23  
24  
25  
26  
27  
28  
29  
30  
31  
32  
33  
34  
35  
36  
37  
38  
39  
40  
41  
42  
43  
44  
45  
46  
47  
48  
49  
50  
51  
52  
53  
54  
55  
56  
57  
58  
59  
60

For peer review only

1  
2  
3  
4  
5  
6  
7  
8  
9  
10  
11  
12  
13  
14  
15  
16  
17  
18  
19  
20  
21  
22  
23  
24  
25  
26  
27  
28  
29  
30  
31  
32  
33  
34  
35  
36  
37  
38  
39  
40  
41  
42  
43  
44  
45  
46  
47  
48  
49  
50  
51  
52  
53  
54  
55  
56  
57  
58  
59  
60

For peer review only

1  
2  
3  
4  
5  
6  
7  
8  
9  
10  
11  
12  
13  
14  
15  
16  
17  
18  
19  
20  
21  
22  
23  
24  
25  
26  
27  
28  
29  
30  
31  
32  
33  
34  
35  
36  
37  
38  
39  
40  
41  
42  
43  
44  
45  
46  
47  
48  
49  
50  
51  
52  
53  
54  
55  
56  
57  
58  
59  
60

For peer review only

1  
2  
3  
4  
5  
6  
7  
8  
9  
10  
11  
12  
13  
14  
15  
16  
17  
18  
19  
20  
21  
22  
23  
24  
25  
26  
27  
28  
29  
30  
31  
32  
33  
34  
35  
36  
37  
38  
39  
40  
41  
42  
43  
44  
45  
46  
47  
48  
49  
50  
51  
52  
53  
54  
55  
56  
57  
58  
59  
60

For peer review only

e)

|    | ICD-10 code | Term                                                                         |
|----|-------------|------------------------------------------------------------------------------|
| 1  |             |                                                                              |
| 2  |             |                                                                              |
| 3  | J41         | Simple and mucopurulent chronic bronchitis                                   |
| 4  | J41.0       | Simple chronic bronchitis                                                    |
| 5  | J41.1       | Mucopurulent chronic bronchitis                                              |
| 6  |             |                                                                              |
| 7  | J41.8       | Mixed simple and mucopurulent chronic bronchitis                             |
| 8  | J42         | Unspecified chronic bronchitis                                               |
| 9  | J43         | Emphysema                                                                    |
| 10 | J43.0       | MacLeod syndrome                                                             |
| 11 | J43.1       | Panlobular emphysema                                                         |
| 12 | J43.2       | Centrilobular emphysema                                                      |
| 13 |             |                                                                              |
| 14 | J43.8       | Other emphysema                                                              |
| 15 | J43.9       | Emphysema, unspecified                                                       |
| 16 | J47         | Bronchiectasis                                                               |
| 17 | J63.1       | Bauxite fibrosis (of lung)                                                   |
| 18 | J63.3       | Graphite fibrosis (of lung)                                                  |
| 19 |             |                                                                              |
| 20 | J84.1       | Other interstitial pulmonary diseases with fibrosis                          |
| 21 | J60         | Coalworker pneumoconiosis                                                    |
| 22 | J61         | Pneumoconiosis due to asbestos and other mineral fibres                      |
| 23 | J62         | Pneumoconiosis due to dust containing silica                                 |
| 24 |             |                                                                              |
| 25 | J62.0       | Pneumoconiosis due to talc dust                                              |
| 26 | J62.8       | Pneumoconiosis due to other dust containing silica                           |
| 27 | J63         | Pneumoconiosis due to other inorganic dusts                                  |
| 28 | J63.8       | Pneumoconiosis due to other specified inorganic dusts                        |
| 29 |             |                                                                              |
| 30 | J64         | Unspecified pneumoconiosis                                                   |
| 31 | J65         | Pneumoconiosis associated with tuberculosis                                  |
| 32 | P27.1       | Bronchopulmonary dysplasia originating in the perinatal period               |
| 33 | J44         | Other chronic obstructive pulmonary disease                                  |
| 34 | J44.0       | Chronic obstructive pulmonary disease with acute lower respiratory infection |
| 35 | J44.1       | Chronic obstructive pulmonary disease with acute exacerbation, unspecified   |
| 36 |             |                                                                              |
| 37 | J44.8       | Other specified chronic obstructive pulmonary disease                        |
| 38 | J44.9       | Chronic obstructive pulmonary disease, unspecified                           |
| 39 |             |                                                                              |
| 40 |             |                                                                              |
| 41 |             |                                                                              |
| 42 |             |                                                                              |
| 43 |             |                                                                              |
| 44 |             |                                                                              |
| 45 |             |                                                                              |
| 46 |             |                                                                              |
| 47 |             |                                                                              |
| 48 |             |                                                                              |
| 49 |             |                                                                              |
| 50 |             |                                                                              |
| 51 |             |                                                                              |
| 52 |             |                                                                              |
| 53 |             |                                                                              |
| 54 |             |                                                                              |
| 55 |             |                                                                              |
| 56 |             |                                                                              |
| 57 |             |                                                                              |
| 58 |             |                                                                              |
| 59 |             |                                                                              |
| 60 |             |                                                                              |

| 1  | Prodcod           | Term                                                                       |
|----|-------------------|----------------------------------------------------------------------------|
| 2  | 2372241000033111  | *Cortisone Acetate Granules                                                |
| 3  | 2372541000033113  | *Cortisone Acetate Pills (Sucrose)                                         |
| 4  | 2372141000033116  | *Cortisone Acetate Tablets                                                 |
| 5  | 2509441000033112  | *Prednisolone Granules                                                     |
| 6  | 2509741000033117  | *Prednisolone Pills (Sucrose)                                              |
| 7  | 2509341000033118  | *Prednisolone Tablets                                                      |
| 8  | 12633641000033114 | Alkindi 0.5mg granules in capsules for opening (Diurnal Ltd)               |
| 9  | 12633741000033117 | Alkindi 1mg granules in capsules for opening (Diurnal Ltd)                 |
| 10 | 12633841000033110 | Alkindi 2mg granules in capsules for opening (Diurnal Ltd)                 |
| 11 | 12633941000033119 | Alkindi 5mg granules in capsules for opening (Diurnal Ltd)                 |
| 12 | 144641000033113   | Betamethasone 500microgram soluble tablets sugar free                      |
| 13 | 145441000033110   | Betamethasone 500microgram tablets                                         |
| 14 | 143041000033117   | Betnelan 500microgram tablets (Focus Pharmaceuticals Ltd)                  |
| 15 | 144841000033114   | Betnesol 500microgram soluble tablets (Focus Pharmaceuticals Ltd)          |
| 16 | 371941000033113   | Cortisone 25mg tablets                                                     |
| 17 | 375741000033113   | Cortisone Acetate Tablets 25 mg                                            |
| 18 | 369541000033110   | Cortisone Acetate Tablets 5 mg                                             |
| 19 | 372041000033119   | Cortisone Tablets 5 mg                                                     |
| 20 | 430841000033118   | Decadron 500microgram tablets (Merck Sharp & Dohme Ltd)                    |
| 21 | 5497541000033111  | Decadron Elixir 500 micrograms/5 ml                                        |
| 22 | 429141000033119   | Decortisyl Tablets 5 mg                                                    |
| 23 | 431541000033114   | Deltacortril 2.5mg gastro-resistant tablets (Alliance Pharmaceuticals Ltd) |
| 24 | 431641000033110   | Deltacortril 5mg gastro-resistant tablets (Alliance Pharmaceuticals Ltd)   |
| 25 | 429441000033110   | Deltastab Tablets 1 mg                                                     |
| 26 | 429541000033111   | Deltastab Tablets 5 mg                                                     |
| 27 | 9122441000033114  | Dexamethasone 10mg/5ml oral solution sugar free                            |
| 28 | 10213841000033110 | Dexamethasone 20mg/5ml oral solution sugar free                            |
| 29 | 11072141000033115 | Dexamethasone 2mg soluble tablets sugar free                               |
| 30 | 431841000033111   | Dexamethasone 2mg tablets                                                  |
| 31 | 2146541000033118  | Dexamethasone 2mg/5ml oral solution sugar free                             |
| 32 | 12398241000033119 | Dexamethasone 40mg tablets                                                 |
| 33 | 11072241000033110 | Dexamethasone 4mg soluble tablets sugar free                               |
| 34 | 5506241000033117  | Dexamethasone 4mg tablets                                                  |
| 35 | 431941000033115   | Dexamethasone 500microgram tablets                                         |
| 36 | 5900841000033112  | Dexamethasone 500micrograms/5ml oral solution                              |
| 37 | 5900941000033116  | Dexamethasone 500micrograms/5ml oral suspension                            |
| 38 | 5900641000033111  | Dexamethasone 5mg/5ml oral solution                                        |
| 39 | 5900741000033119  | Dexamethasone 5mg/5ml oral suspension                                      |
| 40 | 11072341000033117 | Dexamethasone 8mg soluble tablets sugar free                               |
| 41 | 12575941000033114 | Dexamethasone 8mg tablets                                                  |
| 42 | 429841000033113   | Dexamethasone Tablets 250 micrograms                                       |
| 43 | 2146441000033119  | Dexsol 2mg/5ml oral solution (Rosemont Pharmaceuticals Ltd)                |
| 44 | 8494441000033110  | Dilacort 2.5mg gastro-resistant tablets (Crescent Pharma Ltd)              |
| 45 | 8494541000033111  | Dilacort 5mg gastro-resistant tablets (Crescent Pharma Ltd)                |
| 46 | 12389541000033113 | Glenzoludex 2mg soluble tablets (Glenmark Pharmaceuticals Europe Ltd)      |
| 47 | 12389641000033114 | Glenzoludex 4mg soluble tablets (Glenmark Pharmaceuticals Europe Ltd)      |
| 48 | 12389741000033117 | Glenzoludex 8mg soluble tablets (Glenmark Pharmaceuticals Europe Ltd)      |
| 49 | 12890041000033114 | Hydrocortisone 10mg soluble tablets sugar free                             |
| 50 | 744541000033116   | Hydrocortisone 10mg tablets                                                |

|    |                   |                                                                     |
|----|-------------------|---------------------------------------------------------------------|
| 1  |                   |                                                                     |
| 2  | 740241000033111   | Hydrocortisone 10mg/5ml oral suspension                             |
| 3  | 12633341000033118 | Hydrocortisone 1mg granules in capsules for opening                 |
| 4  | 8142041000033116  | Hydrocortisone 20mg modified-release tablets                        |
| 5  | 742241000033110   | Hydrocortisone 20mg tablets                                         |
| 6  |                   |                                                                     |
| 7  | 2149441000033113  | Hydrocortisone 25mg/5ml oral suspension                             |
| 8  | 12633441000033112 | Hydrocortisone 2mg granules in capsules for opening                 |
| 9  | 12633241000033111 | Hydrocortisone 500microgram granules in capsules for opening        |
| 10 | 12633541000033113 | Hydrocortisone 5mg granules in capsules for opening                 |
| 11 | 8141941000033110  | Hydrocortisone 5mg modified-release tablets                         |
| 12 |                   |                                                                     |
| 13 | 1830141000033115  | Hydrocortisone 5mg/5ml oral suspension                              |
| 14 | 2623741000033116  | Hydrocortisone 5mg/5ml oral suspension sugar free                   |
| 15 | 744641000033115   | Hydrocortone 10mg tablets (Auden McKenzie (Pharma Division) Ltd)    |
| 16 | 744741000033112   | Hydrocortone 20mg tablets (Auden McKenzie (Pharma Division) Ltd)    |
| 17 | 5990641000033113  | Lodotra 1mg modified-release tablets (Napp Pharmaceuticals Ltd)     |
| 18 | 5990741000033116  | Lodotra 2mg modified-release tablets (Napp Pharmaceuticals Ltd)     |
| 19 | 5990841000033114  | Lodotra 5mg modified-release tablets (Napp Pharmaceuticals Ltd)     |
| 20 |                   |                                                                     |
| 21 | 6512741000033110  | Martapan 2mg/5ml oral solution (Martindale Pharmaceuticals Ltd)     |
| 22 | 898441000033115   | Medrone 100mg tablets (Pfizer Ltd)                                  |
| 23 | 899641000033110   | Medrone 16mg tablets (Pfizer Ltd)                                   |
| 24 | 899741000033118   | Medrone 2mg tablets (Pfizer Ltd)                                    |
| 25 | 899841000033111   | Medrone 4mg tablets (Pfizer Ltd)                                    |
| 26 | 898541000033119   | Methylprednisolone 100mg tablets                                    |
| 27 | 903141000033113   | Methylprednisolone 16mg tablets                                     |
| 28 | 904141000033111   | Methylprednisolone 2mg tablets                                      |
| 29 | 904241000033116   | Methylprednisolone 4mg tablets                                      |
| 30 |                   |                                                                     |
| 31 | 12398341000033112 | Neofordex 40mg tablets (Aspire Pharma Ltd)                          |
| 32 | 10212641000033118 | Pevanti 10mg tablets (Advanz Pharma)                                |
| 33 | 10212441000033115 | Pevanti 2.5mg tablets (Advanz Pharma)                               |
| 34 | 10212741000033110 | Pevanti 20mg tablets (Advanz Pharma)                                |
| 35 | 10212941000033113 | Pevanti 25mg tablets (Advanz Pharma)                                |
| 36 | 10212541000033119 | Pevanti 5mg tablets (Advanz Pharma)                                 |
| 37 |                   |                                                                     |
| 38 | 8142241000033112  | Plenadren 20mg modified-release tablets (Shire Pharmaceuticals Ltd) |
| 39 | 8142141000033117  | Plenadren 5mg modified-release tablets (Shire Pharmaceuticals Ltd)  |
| 40 | 1137241000033115  | Precortisyl Forte Tablets 25 mg                                     |
| 41 | 1137041000033111  | Precortisyl Tablets 1 mg                                            |
| 42 | 1137141000033110  | Precortisyl Tablets 5 mg                                            |
| 43 | 1137341000033113  | Prednesol Soluble tablets 5 mg                                      |
| 44 | 10212141000033111 | Prednisolone 10mg tablets                                           |
| 45 | 10494341000033117 | Prednisolone 10mg/ml oral solution sugar free                       |
| 46 | 9119141000033118  | Prednisolone 15mg/5ml oral solution                                 |
| 47 | 11507841000033115 | Prednisolone 1mg gastro-resistant tablets                           |
| 48 | 1131741000033117  | Prednisolone 1mg tablets                                            |
| 49 | 1114241000033116  | Prednisolone 2.5mg gastro-resistant tablets                         |
| 50 | 1131841000033110  | Prednisolone 2.5mg tablets                                          |
| 51 | 10212341000033114 | Prednisolone 20mg tablets                                           |
| 52 | 1130741000033110  | Prednisolone 25mg tablets                                           |
| 53 | 11664841000033116 | Prednisolone 30mg tablets                                           |
| 54 | 1114341000033114  | Prednisolone 5mg gastro-resistant tablets                           |
| 55 | 1127341000033111  | Prednisolone 5mg soluble tablets                                    |
| 56 | 1131941000033119  | Prednisolone 5mg tablets                                            |
| 57 |                   |                                                                     |
| 58 |                   |                                                                     |
| 59 |                   |                                                                     |
| 60 |                   |                                                                     |

1  
2 10266841000033117 Prednisolone 5mg/5ml oral solution unit dose  
3 10988941000033111 Prednisolone Dompe Oral solution 5 mg/5 ml unit dose  
4 1130841000033117 Prednisolone Steaglate Tablets 6.65 mg  
5 5990141000033115 Prednisone 1mg modified-release tablets  
6 5990241000033110 Prednisone 2mg modified-release tablets  
7 5990341000033117 Prednisone 5mg modified-release tablets  
8  
9  
10  
11  
12  
13  
14  
15  
16  
17  
18  
19  
20  
21  
22  
23  
24  
25  
26  
27  
28  
29  
30  
31  
32  
33  
34  
35  
36  
37  
38  
39  
40  
41  
42  
43  
44  
45  
46  
47  
48  
49  
50  
51  
52  
53  
54  
55  
56  
57  
58  
59  
60

For peer review only



|    |                   |
|----|-------------------|
| 1  |                   |
| 2  | Medcodeid         |
| 3  | 43850011          |
| 4  | 60444016          |
| 5  | 90135019          |
| 6  | 107545013         |
| 7  | 109700019         |
| 8  | 110659019         |
| 9  | 143003017         |
| 10 | 146259010         |
| 11 | 299650019         |
| 12 | 299654011         |
| 13 | 299655012         |
| 14 | 299673010         |
| 15 | 299675015         |
| 16 | 350517010         |
| 17 | 411508017         |
| 18 | 504901000006118   |
| 19 | 728671000006119   |
| 20 | 741661000006118   |
| 21 | 741681000006111   |
| 22 | 741691000006114   |
| 23 | 741701000006114   |
| 24 | 789941000006117   |
| 25 | 884131000006114   |
| 26 | 905451000006118   |
| 27 | 1749291000006113  |
| 28 | 2297871000000111  |
| 29 | 2297911000000113  |
| 30 | 2297951000000112  |
| 31 | 2297991000000116  |
| 32 | 2674471000006117  |
| 33 | 3244761000006113  |
| 34 | 3552501000006119  |
| 35 | 3654631000006113  |
| 36 | 5057801000006113  |
| 37 | 5590581000006114  |
| 38 | 6214751000006112  |
| 39 | 7052811000006113  |
| 40 | 7501601000006111  |
| 41 | 7501711000006118  |
| 42 | 13941061000006111 |
| 43 | 13941071000006116 |
| 44 | 7360241000006116  |
| 45 | 82343012          |
| 46 | 119481012         |
| 47 | 251698019         |
| 48 | 256478018         |
| 49 | 256485019         |
| 50 | 300130013         |
| 51 | 300132017         |

For peer review only

1  
2 300133010  
3 300134016  
4 350465014  
5 421235014  
6 456154015  
7  
8 1488912012  
9 2674487014  
10 2675253013  
11 376541000000117  
12 385221000000110  
13 386991000000110  
14 636701000000115  
15 636721000000112  
16 783761000006118  
17 1547561000006113  
18 1547571000006118  
19 1547611000006111  
20 1701641000006111  
21 1810721000006117  
22 1823951000006111  
23 1905451000006118  
24 2006271000006112  
25 2309761000000114  
26 2309851000000115  
27 2805631000006119  
28 2805651000006114  
29 3063041000006112  
30 3299911000006116  
31 3679061000006111  
32 3679071000006116  
33 5046721000006110  
34 5046731000006113  
35 5046751000006118  
36 5057261000006110  
37 5669591000006113  
38 5669601000006117  
39 5669611000006119  
40 5887651000006116  
41 6016401000006115  
42 6043781000006115  
43 7064691000006118  
44 7101091000006119  
45 7152861000006115  
46 7185061000006114  
47 7254921000006110  
48 7261781000006116  
49 7275691000006117  
50 7292711000006116  
51 7338801000006111  
52 7375931000006117

For peer review only

1  
2 7428901000006112  
3 7455581000006115  
4 7594061000006119  
5 7594071000006114  
6 7610331000006110  
7 7731461000006119  
8 8021691000006116  
9 8037691000006113  
10 8316981000006114  
11 8439861000006115  
12 14161691000006115  
13 173401000006114  
14 173421000006116  
15 30273012  
16 64466019  
17 87208017  
18 98484016  
19 118689010  
20 129661016  
21 135665013  
22 158317012  
23 216205019  
24 251689017  
25 296931015  
26 296938014  
27 296939018  
28 296940016  
29 296947018  
30 296948011  
31 296949015  
32 296950015  
33 296951016  
34 297138017  
35 299742017  
36 300234010  
37 300312010  
38 300321011  
39 300503012  
40 300533017  
41 300534011  
42 300535012  
43 300536013  
44 300537016  
45 300538014  
46 300539018  
47 300540016  
48 300541017  
49 300542012  
50 300543019  
51 300547018  
52  
53  
54  
55  
56  
57  
58  
59  
60

For peer review only

1  
2 300550015  
3 300552011  
4 300553018  
5 300554012  
6 300555013  
7 300556014  
8 300557017  
9 300558010  
10 300559019  
11 300561011  
12 300562016  
13 300563014  
14 300564015  
15 300672010  
16 300673017  
17 300674011  
18 300676013  
19 300677016  
20 300681016  
21 300691010  
22 300692015  
23 300695018  
24 300696017  
25 300697014  
26 300704016  
27 300710016  
28 300711017  
29 300712012  
30 300713019  
31 300964011  
32 302984016  
33 304527018  
34 304536019  
35 305585018  
36 307739018  
37 307740016  
38 307741017  
39 307742012  
40 307747018  
41 307749015  
42 307750015  
43 307780013  
44 307781012  
45 307782017  
46 307815016  
47 307832017  
48 307833010  
49 307834016  
50 307838018  
51 307861016  
52  
53  
54  
55  
56  
57  
58  
59  
60

For peer review only

1  
2 307862011  
3 307866014  
4 307867017  
5 307868010  
6 307869019  
7 307871019  
8 307872014  
9 325205013  
10 345723011  
11 350892013  
12 395794011  
13 395795012  
14 395796013  
15 395801015  
16 395803017  
17 398450017  
18 411540018  
19 412645018  
20 419640012  
21 437622013  
22 449993015  
23 451478017  
24 451479013  
25 452963015  
26 453210011  
27 494431010  
28 495552014  
29 497563011  
30 497564017  
31 503317010  
32 1227369013  
33 1235655012  
34 1235913017  
35 1786197015  
36 1786198013  
37 2162148012  
38 2162149016  
39 2162422011  
40 2534187010  
41 2675439010  
42 2675878019  
43 2695366017  
44 2795114019  
45 3505881015  
46 3511086012  
47 3511955015  
48 3511959014  
49 3636257010  
50 3636258017  
51 1980100006110  
52  
53  
54  
55  
56  
57  
58  
59  
60

For peer review only

1  
2 19831000006119  
3 19841000006112  
4 19851000006114  
5 19861000006111  
6 19871000006116  
7  
8 19881000006118  
9 24951000006110  
10 24981000006119  
11 24991000006116  
12 100681000006116  
13 100691000006118  
14 100701000006118  
15 100721000006111  
16 100771000006112  
17  
18 100811000006112  
19 100821000006116  
20 200961000006116  
21 211691000006114  
22 215511000000110  
23 216571000006116  
24 217601000000119  
25 218541000000116  
26 218551000000118  
27 231561000006110  
28 238581000006112  
29 238621000006112  
30 238651000006115  
31 268641000006113  
32 268671000006117  
33 269411000006115  
34 269431000006114  
35 269441000006116  
36 358041000000114  
37 359731000000112  
38 359871000000116  
39 420621000006111  
40 491241000006118  
41 542251000006112  
42 586241000006116  
43 632111000000118  
44 632731000006118  
45 638821000006113  
46 638871000006114  
47 801981000006111  
48 851241000006115  
49 866221000006112  
50 884141000006116  
51 884631000006118  
52 884641000006111  
53 884651000006113

For peer review only

1  
2 884731000006110  
3 884751000006115  
4 888681000006112  
5 888691000006110  
6 888731000006119  
7 905491000006112  
8 909471000006114  
9 989221000006110  
10 1119161000000115  
11 1545591000006112  
12 1548401000006112  
13 1549761000006110  
14 1729331000006116  
15 1786921000006116  
16 1848121000006110  
17 2144741000000111  
18 2168741000000113  
19 2210381000000117  
20 2234371000000119  
21 2234411000000115  
22 2234541000000115  
23 2238261000000112  
24 2238301000000119  
25 2238341000000116  
26 2488341000000112  
27 2488381000000116  
28 2608401000000118  
29 2730141000006117  
30 2751261000006119  
31 2765831000006118  
32 2784341000006116  
33 2784351000006119  
34 2837981000006113  
35 2838001000006118  
36 2856061000006119  
37 2892651000006119  
38 3123551000006116  
39 3215871000006116  
40 3244261000006119  
41 3308951000006115  
42 3331521000006116  
43 3345371000006113  
44 3414341000006115  
45 3414351000006118  
46 3439701000006113  
47 3439711000006111  
48 3462921000006119  
49 3553621000006119  
50 3614311000006116  
51 3648381000006112  
52  
53  
54  
55  
56  
57  
58  
59  
60

For peer review only

1 3648391000006110  
2 3745871000006116  
3 3756351000006111  
4 3767281000006116  
5 3865591000006112  
6 3870981000006117  
7 3918361000006110  
8 3932731000006114  
9 3962581000006110  
10 3978101000006118  
11 4056781000006117  
12 4056971000006118  
13 4056981000006115  
14 4059051000006119  
15 4374441000006113  
16 4403261000006113  
17 4540551000006119  
18 4785671000006113  
19 5011651000006111  
20 5011661000006113  
21 5014411000006111  
22 5014421000006115  
23 5049421000006111  
24 5049471000006112  
25 5050621000006118  
26 5051301000006111  
27 5057591000006116  
28 5057621000006119  
29 5057651000006111  
30 5057661000006113  
31 5059251000006117  
32 5059271000006110  
33 5059301000006112  
34 5059321000006119  
35 5233761000006119  
36 5477661000006119  
37 5560171000006116  
38 5593331000006113  
39 5593341000006115  
40 5653441000006111  
41 5836921000006114  
42 5836951000006117  
43 5886741000006110  
44 5912511000006114  
45 5992311000006119  
46 6018491000006111  
47 6018501000006115  
48 6348261000006111  
49 6348271000006116  
50 6348281000006118

For peer review only



1  
2 6348291000006115  
3 6601121000006118  
4 6601131000006115  
5 6694741000006111  
6 6694751000006113  
7 6694761000006110  
8 6694771000006115  
9  
10 7070211000006112  
11 7078581000006116  
12 7078591000006118  
13 7078601000006114  
14 7095381000006112  
15 7098321000006117  
16 7218941000006118  
17 7273741000006119  
18 7598991000006116  
19 7599001000006116  
20 7609581000006110  
21 7617181000006110  
22 7699481000006113  
23 7848701000006116  
24 7966351000006118  
25 7967281000006119  
26 8041571000006119  
27 8041581000006116  
28 8041601000006114  
29 8042101000006112  
30 8042511000006119  
31 8044851000006112  
32 8361011000006114  
33 8361031000006115  
34 9652981000006114  
35 12027691000006119  
36 12107671000006115  
37 12107691000006119  
38 12122311000006110  
39 12126121000006117  
40 12126161000006111  
41 12126841000006116  
42 12127261000006118  
43 12127301000006110  
44 13949481000006113  
45 14164461000006112  
46 14164481000006119  
47 14194181000006111  
48 14194871000006117  
49 1705016  
50 22613011  
51 39767019  
52 89332015

For peer review only

1  
2 100438013  
3 104563015  
4 111625010  
5 145328019  
6 145620019  
7 251691013  
8 256451015  
9 294491014  
10 297013012  
11 299570018  
12 299572014  
13 299573016  
14 299630018  
15 299633016  
16 299634010  
17 299636012  
18 299637015  
19 299723016  
20 299750014  
21 299776014  
22 299800012  
23 299804015  
24 299805019  
25 299834013  
26 299835014  
27 299848013  
28 299851018  
29 299853015  
30 300374018  
31 300379011  
32 300401011  
33 300402016  
34 300403014  
35 300418010  
36 300419019  
37 300436010  
38 300510018  
39 300514010  
40 300515011  
41 300861019  
42 300867015  
43 300876010  
44 300879015  
45 300884014  
46 300886011  
47 300932016  
48 300944018  
49 300963017  
50 304524013  
51 304537011  
52  
53  
54  
55  
56  
57  
58  
59  
60

For peer review only

1  
2 313444015  
3 350535018  
4 355548016  
5 355549012  
6 377172018  
7 395756011  
8 395791015  
9 397829016  
10 400805012  
11 411904010  
12 451368019  
13 451372015  
14 451376017  
15 459488019  
16 459859010  
17 477999016  
18 2534664018  
19 2534674015  
20 2536393012  
21 2537480011  
22 2675255018  
23 39111000006114  
24 52981000006112  
25 149701000006118  
26 161591000006114  
27 223951000000112  
28 235911000006116  
29 370711000006115  
30 371021000006118  
31 394541000006112  
32 407291000006117  
33 410751000006118  
34 417171000006111  
35 424291000006117  
36 426481000006114  
37 480631000006119  
38 496981000006113  
39 496991000006111  
40 585631000000113  
41 634751000006116  
42 635641000006111  
43 800691000006113  
44 818521000006112  
45 883951000006115  
46 883981000006111  
47 884101000006118  
48 884161000006117  
49 884181000006110  
50 884201000006111  
51 884211000006114

For peer review only

1 884611000006112  
2 884621000006116  
3 905361000006110  
4 905441000006115  
5 906771000006113  
6 908791000006113  
7 968201000006114  
8 989111000006113  
9 1130181000000113  
10 1539331000006118  
11 1823891000006113  
12 1895641000006114  
13 2115181000000110  
14 2504421000006117  
15 2709711000006116  
16 2941981000006112  
17 3013481000006111  
18 3182531000006110  
19 3268641000006118  
20 3302691000006119  
21 3302731000006110  
22 3371381000006110  
23 3371411000006113  
24 3371421000006117  
25 3522701000006112  
26 4776031000006115  
27 4777241000006117  
28 4778311000006112  
29 5011861000006114  
30 5057981000006111  
31 5496991000006110  
32 5974561000006110  
33 6633851000006110  
34 6841231000006113  
35 6841391000006118  
36 6847761000006118  
37 6860251000006115  
38 6860261000006118  
39 6864781000006110  
40 7084801000006112  
41 7475721000006114  
42 7482951000006115  
43 7573181000006118  
44 7573211000006119  
45 7703511000006110  
46 8015271000006112  
47 8026081000006119  
48 12321891000006112  
49 13944851000006115  
50 14015031000006119

For peer review only

1  
2 14196331000006118  
3 22613011  
4 76377011  
5 77703015  
6 80189019  
7  
8 313400018  
9 313403016  
10 313423015  
11 313424014  
12 313427019  
13 313439010  
14 313444015  
15 313448017  
16 315680013  
17 315686019  
18 316833010  
19 355549012  
20 377170014  
21 377172018  
22 377798017  
23 400805012  
24 400815018  
25 3527478013  
26 371771000006115  
27 580911000006114  
28 580921000006118  
29 580931000006115  
30 580941000006113  
31 580951000006110  
32 580961000006112  
33 580971000006117  
34 581261000006110  
35 582721000006116  
36 583181000006114  
37 583791000006113  
38 637121000000110  
39 905361000006110  
40 905441000006115  
41 968201000006114  
42 1547441000006113  
43 2709701000006119  
44 2709711000006116  
45 3268641000006118  
46 3285001000006119  
47 3339391000006110  
48 3371411000006113  
49 4824961000006118  
50 5327651000006111  
51 7475721000006114  
52 12126011000006114  
53  
54  
55  
56  
57  
58  
59  
60

For peer review only

1  
2 12321891000006112  
3 18472010  
4 70653017  
5 94251011  
6 139475013  
7 139482012  
8 147247018  
9 206703015  
10 251680018  
11 299673010  
12 300179017  
13 300180019  
14 300217019  
15 305601017  
16 317955011  
17 324974014  
18 324975010  
19 325061011  
20 350484012  
21 395772015  
22 412678013  
23 451426015  
24 453099015  
25 493287011  
26 510016018  
27 1488804017  
28 2549208013  
29 2675255018  
30 223981000000118  
31 504901000006118  
32 504911000006115  
33 728671000006119  
34 728681000006116  
35 741681000006111  
36 741691000006114  
37 741701000006114  
38 789941000006117  
39 905391000006119  
40 1647701000000118  
41 1661371000000112  
42 1747691000006119  
43 2227501000000110  
44 2352391000000117  
45 2504341000006116  
46 2585431000006117  
47 2660881000006116  
48 2664351000006113  
49 3182541000006117  
50 3182551000006115  
51 3182561000006118

For peer review only

1  
2 3213831000006118  
3 3244761000006113  
4 3283871000006117  
5 3489281000006119  
6 3589241000006116  
7 3868341000006118  
8 3886041000006118  
9 3886061000006119  
10 4193361000006119  
11 4540521000006111  
12 6043761000006113  
13 6204381000006117  
14 6914191000006115  
15 6919191000006119  
16 7025691000006110  
17 7052811000006113  
18 7056281000006118  
19 7250571000006113  
20 7251291000006119  
21 7321121000006119  
22 7507301000006110  
23 7510341000006110  
24 7573171000006116  
25 7573181000006118  
26 7573191000006115  
27 7573201000006117  
28 7573211000006119  
29 8011111000006111  
30 8030311000006111  
31 8048061000006111  
32 13910671000006110  
33 13971301000006111  
34 14015051000006114  
35  
36  
37  
38  
39  
40  
41  
42  
43  
44  
45  
46  
47  
48  
49  
50  
51  
52  
53  
54  
55  
56  
57  
58  
59  
60

For peer review only

1 Term  
2  
3 Pulmonary arterial hypertension  
4 Benign hypertensive heart disease  
5 Malignant hypertensive heart disease  
6 Hypertensive heart disease  
7  
8 Benign hypertensive heart AND renal disease  
9 Malignant hypertensive heart AND renal disease  
10 Hypertensive heart AND renal disease  
11 Secondary pulmonary hypertension  
12 Malignant hypertensive heart disease NOS  
13 Benign hypertensive heart disease NOS  
14 Hypertensive heart disease NOS  
15 Hypertensive heart and renal disease with renal failure  
16 Hypertensive heart and renal disease NOS  
17 Thromboembolic pulmonary hypertension  
18 Cardiomegaly - hypertensive  
19 Benign hypertensive heart disease with congestive cardiac failure  
20 Malignant hypertensive heart disease with congestive cardiac failure  
21 Hypertensive heart disease NOS  
22 Hypertensive heart disease NOS with CCF  
23 Hypertensive heart disease NOS without CCF  
24 Hypertensive heart and renal disease with (congestive) heart failure  
25 Hypertensive heart and renal disease with both (congestive) heart failure and renal failure  
26 Hypertensive renal + heart dis  
27 [RFC] Pulmonary embolism/pulmonary hypertension  
28 Thromboembolic pulmonary hypertension  
29 Pulmonary arterial hypertension drugs Band 1  
30 Pulmonary arterial hypertension drugs Band 2  
31 Pulmonary arterial hypertension drugs Band 3  
32 Pulmonary arterial hypertension drugs Band 4  
33 Progressive pulmonary hypertension  
34 Hypertensive heart failure  
35 Hypertensive cardiopathy  
36 Pulmonary hypertension  
37 Chronic thromboembolic pulmonary hypertension  
38 Pulmonary hypertension with occult mitral stenosis  
39 Pulmonary hypertension secondary to raised pulmonary vascular resistance  
40 Right heart failure due to pulmonary hypertension  
41 Precapillary pulmonary hypertension  
42 Pulmonary arterial hypertension associated with connective tissue disease  
43 Mild pulmonary hypertension  
44 Moderate pulmonary hypertension  
45 Double outlet right ventricle with subpulmonary ventricular septal defect  
46 Atrial fibrillation  
47 Ventricular fibrillation  
48 H/O ventricular fibrillation  
49 ECG: atrial fibrillation  
50 ECG: ventricular fibrillation  
51 Atrial fibrillation and flutter  
52 Atrial fibrillation and flutter NOS



1  
2 Ventricular fibrillation and flutter  
3 Ventricular fibrillation and flutter NOS  
4 Non-rheumatic atrial fibrillation  
5 Paroxysmal atrial fibrillation  
6 H/O: atrial fibrillation  
7  
8 Implantation of internal cardiac defibrillator  
9 External ventricular defibrillation  
10 Chronic atrial fibrillation  
11 Cardioverter defibrillator introduced through the vein  
12 Replacement of cardioverter defibrillator  
13 Cardioverter defibrillator introduced through the vein NOS  
14 Persistent atrial fibrillation  
15 Permanent atrial fibrillation  
16 Implantation of intravenous pacemaker for atrial fibrillation  
17 Implantation of cardioverter defibrillator with one electrode lead  
18 Implantation of cardioverter defibrillator with two electrode leads  
19 Other specified cardioverter defibrillator intro thr vein  
20 Implantation of cardioverter defibrillator using three electrode leads  
21 Combination internal cardiac defibrillator and pacemaker in situ  
22 Atrial fibrillation confirmed  
23 Cardioverter defibrillator procedure  
24 Cardiac resynchronisation therapy defibrillator device in situ  
25 Implantation of subcutaneous cardioverter defibrillator  
26 Renewal of subcutaneous cardioverter defibrillator  
27 Defibrillator  
28 Defibrillator, device  
29 Revision of automatic implantable cardioverter/defibrillator  
30 AF - Atrial fibrillation  
31 Implantable defibrillator  
32 Implantable defibrillator, device  
33 Automatic defibrillator procedure  
34 ICD - Internal cardiac defibrillator procedure  
35 Implantation of automatic cardiac defibrillator  
36 Lone atrial fibrillation  
37 AF - Paroxysmal atrial fibrillation  
38 PAF - Paroxysmal atrial fibrillation  
39 Intermittent atrial fibrillation  
40 Controlled atrial fibrillation  
41 History of atrial fibrillation  
42 Rapid atrial fibrillation  
43 Transient cerebral ischaemia due to atrial fibrillation  
44 History of combination internal cardiac defibrillator and pacemaker  
45 Insertion of cardiac defibrillator using fluoroscopic guidance  
46 Insertion of cardiac biventricular implantable cardioverter defibrillator (ICD) using fluoroscopic guidance  
47 Cardiac defibrillator in situ  
48 Implantation of cardioverter defibrillator with three electrode leads  
49 Automatic implantable cardiac defibrillator in situ  
50 Insertion of single chamber pacing cardioverter defibrillator pulse generator  
51 Insertion of biventricular implantable cardioverter defibrillator  
52 Insertion of pacemaker for control of atrial fibrillation

1 Single-chamber implantable defibrillator  
2 Dual-chamber implantable defibrillator  
3 Cardiac resynchronisation therapy implantable defibrillator  
4 Cardiac resynchronization therapy implantable defibrillator  
5 Longstanding persistent atrial fibrillation  
6 Familial atrial fibrillation  
7 Biventricular automatic implantable cardioverter defibrillator in situ  
8 Atrial fibrillation with rapid ventricular response  
9 Replacement of subcutaneous cardioverter defibrillator  
10 Atrial fibrillation detected  
11 Paroxysmal atrial fibrillation with rapid ventricular response  
12 Replace aneurys fem art by fem/peron a anast c vein graf NEC  
13 Replace aneurys pop art by pop/peron a anast c vein graf NEC  
14 Portal vein thrombosis  
15 Hepatic vein thrombosis  
16 Thromboangiitis obliterans  
17 Pulmonary embolism  
18 Cerebral thrombosis  
19 Thrombotic thrombocytopenic purpura  
20 Thrombotic microangiopathy  
21 Renal artery thrombosis  
22 Deep vein thrombosis of leg related to air travel  
23 H/O: Deep Vein Thrombosis  
24 Phlebitis and thrombophlebitis of intracranial sinuses  
25 Thrombosis of superior longitudinal sinus  
26 Thrombosis transverse sinus  
27 Thrombosis of central nervous system venous sinus NOS  
28 Thrombophlebitis of central nervous system venous sinuses  
29 Thrombophlebitis of cavernous sinus  
30 Thrombophlebitis of superior longitudinal venous sinus  
31 Thrombophlebitis lateral venous sinus  
32 Thrombophlebitis of central nervous system venous sinus NOS  
33 Myelopathy due to arterial thrombosis of spinal cord  
34 Coronary thrombosis not resulting in myocardial infarction  
35 Atrial thrombosis  
36 Cerebral infarct due to thrombosis of precerebral arteries  
37 Cerebral infarction due to thrombosis of cerebral arteries  
38 Thromboangiitis obliterans NOS  
39 Embolism and thrombosis of the thoracic aorta  
40 Embolism and thrombosis of an arm or leg artery  
41 Embolism and thrombosis of the brachial artery  
42 Embolism and thrombosis of the radial artery  
43 Embolism and thrombosis of the ulnar artery  
44 Embolism and thrombosis of an arm artery NOS  
45 Embolism and thrombosis of the femoral artery  
46 Embolism and thrombosis of the popliteal artery  
47 Embolism and thrombosis of the anterior tibial artery  
48 Embolism and thrombosis of the dorsalis pedis artery  
49 Embolism and thrombosis of the posterior tibial artery  
50 Embolism and thrombosis of a leg artery NOS

1  
2 Peripheral arterial embolism and thrombosis NOS  
3 Embolism and thrombosis of other specified artery  
4 Embolism and/or thrombosis of the common iliac artery  
5 Embolism and/or thrombosis of the internal iliac artery  
6 Embolism and/or thrombosis of the external iliac artery  
7 Embolism and thrombosis of the iliac artery unspecified  
8 Embolism and thrombosis of the subclavian artery  
9 Embolism and thrombosis of the splenic artery  
10 Embolism and thrombosis of the axillary artery  
11 Embolism and thrombosis of the coeliac artery  
12 Embolism and thrombosis of the hepatic artery  
13 Embolism and thrombosis of other arteries NOS  
14 Arterial embolism and thrombosis NOS  
15 Thrombophlebitis of the femoral vein  
16 Thrombophlebitis of the popliteal vein  
17 Thrombophlebitis of the anterior tibial vein  
18 Thrombophlebitis of the posterior tibial vein  
19 Thrombophlebitis of deep veins of lower extremity  
20 Deep vein phlebitis and thrombophlebitis of the leg NOS  
21 Thrombophlebitis of the common iliac vein  
22 Thrombophlebitis of the internal iliac vein  
23 Thrombophlebitis of the external iliac vein  
24 Thrombophlebitis of iliac vein  
25 Phlebitis and thrombophlebitis of the iliac vein NOS  
26 Thromboembolism of vein  
27 Embolism and thrombosis of the vena cava  
28 Embolism and thrombosis of the renal vein  
29 Other embolism and thrombosis  
30 Embolism and thrombosis NOS  
31 [X]Embolism and thrombosis of other arteries  
32 Thrombosis of mesenteric vein  
33 Scrotal thrombosis  
34 Male genital thrombosis NOS  
35 Pulmonary embolism following abortive pregnancy  
36 Antenatal deep vein thrombosis unspecified  
37 Antenatal deep vein thrombosis - delivered  
38 Antenatal deep vein thrombosis with antenatal complication  
39 Antenatal deep vein thrombosis NOS  
40 Postnatal deep vein thrombosis unspecified  
41 Postnatal deep vein thrombosis with postnatal complication  
42 Postnatal deep vein thrombosis NOS  
43 Obstetric cerebral venous thrombosis  
44 Cerebral venous thrombosis in pregnancy  
45 Cerebral venous thrombosis in the puerperium  
46 Obstetric pulmonary embolism  
47 Obstetric blood-clot pulmonary embolism  
48 Obstetric blood-clot pulmonary embolism unspecified  
49 Obstetric blood-clot pulmonary embolism - delivered  
50 Obstetric blood-clot pulmonary embolism NOS  
51 Other obstetric pulmonary embolism unspecified

1 Other obstetric pulmonary embolism - delivered  
2 Other obstetric pulmonary embolism NOS  
3 Obstetric pulmonary embolism NOS  
4 Obstetric pulmonary embolism NOS, unspecified  
5 Obstetric pulmonary embolism NOS - delivered  
6 Obstetric pulmonary embolism NOS with antenatal complication  
7 Obstetric pulmonary embolism NOS with postnatal complication  
8 Thromboembolism after infusion  
9 Anterior spinal artery thrombosis  
10 Arteriovenous fistula thrombosis  
11 Arterial embolic and thrombotic occlusion  
12 Arterial embolus and thrombosis  
13 Embolism and thrombosis of the abdominal aorta  
14 Deep vein phlebitis and thrombophlebitis of the leg  
15 Venous thrombosis  
16 Other obstetric pulmonary embolism  
17 H/O: thrombosis  
18 Phlebitis and/or thrombophlebitis of iliac vein  
19 Thrombosis of inferior vena cava  
20 Axillary vein thrombosis  
21 Thrombosis of renal artery bypass graft  
22 H/O: Deep vein thrombosis  
23 [V] Personal history of pulmonary embolism  
24 Right ventricular thrombosis  
25 Thrombosis of vein of leg  
26 Retinal vein thrombosis  
27 Antenatal deep vein thrombosis  
28 Postnatal deep vein thrombosis  
29 DVT - deep venous thrombosis, postnatal  
30 Penis vein thrombosis  
31 [V] Personal history DVT (deep vein thrombosis)  
32 Mural thrombosis  
33 Cerebral vein thrombosis  
34 Coronary thrombosis  
35 Thrombosis - coronary  
36 Deep vein thrombosis  
37 Deep venous thrombosis  
38 Deep vein thrombosis of lower limb  
39 Deep vein thrombosis of leg related to intravenous drug use  
40 Pulmonary thromboendarterectomy  
41 Percutaneous transluminal thrombolysis of artery  
42 Transjugular intrahepatic thrombolysis of portal vein  
43 Thrombosis of subclavian vein  
44 Right middle cerebral artery thrombosis  
45 Thrombosis of right vertebral artery  
46 Thrombosis of right middle cerebral artery  
47 Thrombosis of left middle cerebral artery  
48 Iliac vein thrombosis  
49 Thrombosis of iliac vein  
50 Other phlebitis and thrombosis in pregnancy and puerperium

1 Other phlebitis/thrombosis in preg/puerperium + a/n comp  
2 Other phlebitis/thrombosis in preg/puerperium + p/n comp  
3 Other phlebitis/thrombosis in preg/puerperium -del +p/n comp  
4 Other phlebitis/thrombosis in pregnancy and puerperium NOS  
5 Other phlebitis/thrombosis in pregnancy/puerperium - deliv  
6 Other phlebitis/thrombosis in pregnancy/puerperium unsp  
7 Other obstetric pulmonary embolism - delivered + p/n comp  
8 Other obstetric pulmonary embolism with antenatal comp  
9 Other obstetric pulmonary embolism with postnatal comp  
10 Thrombosis of atrium, auricular appendage, and ventricle as current complications following acute myocardial  
11 Cerebral venous thrombosis of cavernous sinus  
12 Thrombosis lateral sinus  
13 Cerebral venous sinus thrombosis  
14 Carotid artery thrombosis  
15 Superior mesenteric artery thrombosis  
16 Superior mesenteric vein thrombosis  
17 Puerperal thrombosis NOS  
18 Postnatal deep vein thrombosis - delivered with postnatal complication  
19 Mesenteric thrombosis  
20 Postoperative deep vein thrombosis  
21 H/O: thromboembolism  
22 Arterial thrombosis  
23 Deep vein thrombosis, leg  
24 Phlebitis or thrombophlebitis of CNS venous sinus NOS  
25 Percutaneous transluminal coronary thrombolytic using streptokinase  
26 Percutaneous transluminal thrombolysis of femoral graft using streptokinase  
27 Percutaneous transluminal coronary thrombolysis using streptokinase  
28 Obstetric pulmonary embolism NOS  
29 Obstetric pulmonary embolism NOS - delivered with p/n comp  
30 Obstetric blood-clot pulmonary embolism - delivered with postnatal complication  
31 Obstetric blood-clot pulmonary embolism with antenatal complication  
32 Obstetric blood-clot pulmonary embolism with postnatal complication  
33 Percutaneous transluminal venous thrombolysis NEC  
34 Percutaneous mechanical thromboembolectomy  
35 Percutaneous aspiration thromboembolectomy  
36 [X]Phlebitis+thrombophlebitis/oth deep vessls/low extremities  
37 Arterial embolism and thrombosis  
38 Cerebral infarction due to cerebral venous thrombosis, non-pyogenic  
39 Non-pyogenic venous sinus thrombosis  
40 Recurrent pulmonary embolism  
41 Antenatal DVT  
42 Embolism and thrombosis NOS  
43 Embolism and thrombosis of other and unspec parts aorta  
44 Gestational thrombosis NOS  
45 Axillary vein thrombosis  
46 Thromboendarterectomy  
47 Coronary thrombosis  
48 Arterial embolism/thrombosis  
49 Embolus/thrombosis abd. aorta  
50 Embolus/thrombosis aorta NOS

1 Deep venous thrombosis - leg  
2 Venous thrombosis NOS  
3 Antepartum DVT  
4 Postpartum DVT  
5 Obstetrical pulmonary embolism  
6 [RFC] Venous thrombosis  
7 [RFC] Deep vein thrombosis  
8 Deep venous thrombosis - leg  
9 Deep vein thrombosis of peroneal vein  
10 Percutaneous transluminal thrombolysis of blood vessel of liver  
11 Percutaneous transluminal thrombolysis and reconstruction of artery  
12 Percutaneous transluminal venous thrombolysis with reconstruction  
13 Cerebral venous thrombosis  
14 Recurrent deep vein thrombosis  
15 Thrombosis of stent of renal artery  
16 Recurrent deep vein thrombosis  
17 Postthrombotic syndrome  
18 Thrombosis of dialysis vascular access  
19 Thrombosis of internal jugular vein  
20 Thrombosis of external jugular vein  
21 Thrombosis of artery of transplanted kidney  
22 Thrombosis of dialysis arteriovenous graft  
23 Thrombosis of dialysis arteriovenous fistula  
24 Thrombosis of dialysis arteriovenous shunt  
25 Unprovoked deep vein thrombosis  
26 Provoked deep vein thrombosis  
27 Perianal venous thrombosis  
28 Splenic vein thrombosis  
29 Renal vein thrombosis  
30 Deep thrombophlebitis  
31 Deep vein thrombosis of portal vein  
32 PVT - Portal vein thrombosis  
33 Thrombosis of lateral venous sinus  
34 Cerebral venous thrombosis of lateral sinus  
35 Thrombosed varices  
36 Branch retinal vein thrombosis  
37 Hepatic vein thrombosis  
38 Thrombosis of corpus cavernosum  
39 Thrombosis of retinal vein  
40 Antepartum deep vein thrombosis  
41 Thrombolysis  
42 Femoral artery thrombosis  
43 Postpartum deep phlebothrombosis  
44 Postpartum deep vein thrombosis  
45 Pulmonary artery thrombosis  
46 Pulmonary arterial thrombosis  
47 PE - Pulmonary embolism  
48 Vertebral artery thrombosis  
49 CRVT - Central retinal vein thrombosis  
50 Thrombosis of superior sagittal sinus

1 Sagittal sinus thrombosis  
2 Thrombosis of penile vein  
3 Thrombotic infarction  
4 Pulmonary vein thrombosis  
5 Hepatic artery thrombosis  
6 Thrombosis of abdominal aorta  
7 Popliteal artery thrombosis  
8 Basilar artery thrombosis  
9 Thrombosis of cavernous venous sinus  
10 Thrombosis of arteries of lower extremity  
11 Thrombosis of pelvic vein  
12 Thrombosis of cerebral veins  
13 Cerebral venous thrombosis  
14 Thrombosis of renal artery  
15 Thrombosed aneurysm  
16 DVT - Deep vein thrombosis  
17 History of deep vein thrombosis  
18 Deep venous thrombosis of the superior mesenteric vein  
19 Cerebral venous thrombosis of sigmoid sinus  
20 Cerebral venous thrombosis of cortical vein  
21 Thrombolysis of intracranial vessel  
22 Percutaneous thrombolysis of intracranial artery  
23 Thrombolysis of artery  
24 Percutaneous thrombolysis of common femoral artery  
25 Thrombolysis of vein  
26 Thrombolysis of arteriovenous fistula  
27 Pulmonary thromboembolism  
28 Acute massive pulmonary embolism  
29 Subacute massive pulmonary embolism  
30 SAMPE - Subacute massive pulmonary embolism  
31 Inferior mesenteric vein thrombosis  
32 Thrombosis of vein of lower leg  
33 Iliofemoral deep vein thrombosis  
34 Iliofemoral deep vein thrombosis  
35 Blood clot in eye  
36 Thrombosis  
37 Aortic thromboembolism  
38 Percutaneous thrombolysis of artery  
39 Percutaneous thrombolysis of vein  
40 Brachiocephalic vein thrombosis  
41 Subclavian artery thrombosis  
42 Intracranial venous thrombosis  
43 Digital arterial thrombosis  
44 Septic thrombophlebitis of sagittal sinus  
45 Thrombosis of vein of lower limb  
46 Thrombosis of vein of trunk  
47 Venous thrombosis, phlebitis and thrombophlebitis  
48 Thromboembolic disorder  
49 Thromboembolism  
50 Thromboembolic disease



1  
2 Thrombotic stroke  
3 Coronary artery thrombosis  
4 CT - Coronary thrombosis  
5 Deep venous thrombosis of lower extremity  
6 DVT - Deep vein thrombosis of lower limb  
7  
8 Deep venous thrombosis of leg  
9 Deep venous thrombosis of lower limb  
10 Thrombosis of ulnar artery  
11 Deep venous thrombosis of deep femoral vein  
12 Thrombosis of the popliteal vein  
13 Deep venous thrombosis of the popliteal vein  
14 History of thromboembolism of vein  
15 Venous thromboembolic disease  
16 Thrombosis  
17  
18 Deep venous thrombosis of peroneal vein  
19 Thrombosis of middle cerebral artery  
20 Cerebral infarction due to thrombosis of middle cerebral artery  
21 Acute pulmonary embolism  
22 Chronic pulmonary thromboembolism  
23 Pulmonary embolism on long-term anticoagulation therapy  
24 Acute occlusion of artery of lower limb co-occurrent and due to thromboembolus  
25 Acute deep vein thrombosis of lower limb  
26 Pulmonary embolism with pulmonary infarction  
27 Acute deep venous thrombosis  
28 Acute deep venous thrombosis of femoral vein  
29 Acute deep venous thrombosis of ileofemoral vein  
30 Chronic pulmonary embolism  
31 Acute deep venous thrombosis of internal jugular vein  
32 History of recurrent deep vein thrombosis  
33 Unprovoked DVT (deep vein thrombosis)  
34 Provoked DVT (deep vein thrombosis)  
35 Thrombosis of arm  
36 LVAD (left ventricular assist device) thrombosis  
37 Chronic deep vein thrombosis of left iliac vein  
38 Acute deep vein thrombosis of left iliac vein  
39 Acute thrombosis of superficial vein of bilateral upper limbs  
40 Right iliac artery thrombosis  
41 Splenic artery thrombosis  
42 Left common femoral artery thrombosis  
43 Thrombophlebitis of right jugular vein  
44 Chronic venous thrombosis  
45 Deep vein thrombosis of lower extremity due to intravenous drug use  
46 Thromboembolus of artery of upper limb  
47 Thromboembolus of artery of lower limb  
48 Acute DVT (deep vein thrombosis) of left peroneal vein  
49 Acute DVT (deep vein thrombosis) of right peroneal vein  
50 Valvular heart disease  
51 Congenital heart disease  
52 Rheumatic heart disease  
53 Atherosclerotic heart disease



1 Thyrotoxic heart disease  
2 Cerebrovascular disease  
3 Acute pulmonary heart disease  
4 Chronic rheumatic heart disease  
5 Chronic pulmonary heart disease  
6 H/O: heart disease NOS  
7 ECG: myocardial ischaemia NOS  
8 Polycythaemia due to cyanotic heart disease  
9 Cerebral degeneration due to cerebrovascular disease  
10 Other acute rheumatic heart disease  
11 Other acute rheumatic heart disease NOS  
12 Acute rheumatic heart disease  
13 Other specified chronic rheumatic heart disease  
14 Other and unspecified rheumatic heart disease  
15 Rheumatic heart disease unspecified  
16 Other rheumatic heart disease NOS  
17 Chronic rheumatic heart disease NOS  
18 Other acute and subacute ischaemic heart disease  
19 Other acute and subacute ischaemic heart disease NOS  
20 Chronic ischaemic heart disease  
21 Other specified chronic ischaemic heart disease  
22 Other specified chronic ischaemic heart disease NOS  
23 Other chronic ischaemic heart disease NOS  
24 Other specified ischaemic heart disease  
25 Ischaemic heart disease NOS  
26 Acute pulmonary heart disease NOS  
27 Other chronic pulmonary heart disease  
28 Other chronic pulmonary heart disease NOS  
29 Other cerebrovascular disease  
30 Generalised ischaemic cerebrovascular disease NOS  
31 Other cerebrovascular disease OS  
32 Other cerebrovascular disease NOS  
33 Late effects of cerebrovascular disease  
34 Other specified cerebrovascular disease  
35 Cerebrovascular disease NOS  
36 Arteriosclerotic vascular disease NOS  
37 Other specified peripheral vascular disease  
38 Other specified peripheral vascular disease NOS  
39 Peripheral vascular disease NOS  
40 [X]Other acute rheumatic heart disease  
41 [X]Other specified rheumatic heart diseases  
42 [X]Other forms of acute ischaemic heart disease  
43 [X]Other forms of chronic ischaemic heart disease  
44 [X]Other specified pulmonary heart diseases  
45 Heart disease  
46 [X]Cardiovascular disease, unspecified  
47 [X]Other specified cerebrovascular diseases  
48 [X]Other specified peripheral vascular diseases  
49 Male genital organ vascular diseases  
50 Male genital vascular diseases NOS

1 Acyanotic congenital heart disease NOS  
2 Peripheral ischaemic vascular disease  
3 Heart disease during pregnancy  
4 Congenital heart disease in pregnancy  
5 Congenital heart disease, septal and bulbar anomalies  
6 Chronic pulmonary heart disease NOS  
7 Other peripheral vascular disease  
8 H/O: cardiovascular disease  
9 Cyanotic congenital heart disease  
10 Aspirin prophylaxis for ischaemic heart disease  
11 H/O: cerebrovascular disease  
12 H/O: Treatment for ischaemic heart disease  
13 H/O: Peripheral vascular disease procedure  
14 Transient myocardial ischaemia  
15 Asymptomatic coronary heart disease  
16 Renal vascular disease  
17 Ischaemic heart disease  
18 Chronic myocardial ischaemia  
19 Arteriosclerotic heart disease  
20 IHD - Ischaemic heart disease  
21 Congestive heart failure due to valvular disease  
22 Other acute and subacute ischaemic heart disease  
23 On Warfarin and aspirin - IHD prophylaxis  
24 Sequelae/other + unspecified cerebrovascular diseases  
25 Sarcoid heart disease  
26 Heart diseases  
27 Peripheral vascular disease  
28 [X]Cerebrovascular diseases  
29 [X]Chronic rheumatic heart disease  
30 [X]Ischaemic heart diseases  
31 [X]Other cerebrovascular disorders in diseases CE  
32 [X]Other heart disorders in other diseases CE  
33 [X]Other vascular syndroms/brain in cerebrovasculr diseases  
34 [X]Pulmon heart disease & diseases of pulmonary circulation  
35 [X]Sequelae/other + unspecified cerebrovascular diseases  
36 Amyloid heart muscle disease  
37 Arteriosclerotic vascular disease  
38 Atherosclerotic cardiovascular disease  
39 Emergency hospital admission for ischaemic heart disease  
40 ECG myocardial ischaemia  
41 ECG:shows myocardial ischaemia  
42 Diffuse cerebrovascular disease  
43 Heart disease - pulmonary  
44 Acute RH. heart disease NOS  
45 Chronic rheumatic heart diseas  
46 Rheumatic heart disease NOS  
47 Acute/subacute IHD NOS  
48 Pulmonary heart disease  
49 Pulmonary heart disease NOS  
50 Other pulmonary heart disease

1  
2 Peripheral vasc. disease NOS  
3 Peripheral vasc. disease NOS  
4 [RFC] Chronic heart disease (CHD)  
5 [RFC] Congenital heart disease  
6 [RFC] Peripheral vascular disease  
7 [RFC] Coronary heart disease  
8 Mental retardation, congenital heart disease, blepharophimosis, blepharoptosis and hypoplastic teeth  
9  
10 Rheumatic heart disease NOS  
11 Small vessel cerebrovascular disease  
12 H/O: coronary heart disease  
13 Coronary heart disease confirmed  
14 On coronary heart disease register  
15 Coronary microvascular disease  
16 Heart valve disease  
17 CHD - Congenital heart disease  
18 Vascular disease  
19 Cardiovascular renal disease  
20 Congestive heart disease  
21 Coloboma, congenital heart disease, choanal atresia, growth retardation, genital hypoplasia, ear and hearing a  
22 Cardiovascular disease  
23 CVD - cardiovascular disease  
24 CAD - Coronary artery disease  
25 CHD - Coronary heart disease  
26 Coronary heart disease  
27 CVD - Cerebrovascular disease  
28 Ischaemic heart disease - angina  
29 Sarcoid heart muscle disease  
30 Sequelae of cerebrovascular disease  
31 Asymptomatic cerebrovascular disease  
32 Peripheral ischemic vascular disease  
33 History of cardiovascular disease  
34 History of treatment for ischaemic heart disease  
35 PVD-peripheral vascular disease  
36 Acute ischaemic heart disease  
37 Acute myocardial ischaemia  
38 Chronic ischemic heart disease  
39 Ischemic heart disease  
40 IHD - Ischemic heart disease  
41 Myocardial ischaemia  
42 Mixed myocardial ischaemia and infarction  
43 Heart failure due to end stage congenital heart disease  
44 History of peripheral vascular disease  
45 Heart failure with reduced ejection fraction due to coronary artery disease  
46 Heart failure with reduced ejection fraction due to heart valve disease  
47 Subacute ischaemic heart disease  
48 Peripheral vascular disease associated with another disorder  
49 Visual disturbance as sequela of cerebrovascular disease  
50 Intellectual disability, congenital heart disease, blepharophimosis, blepharoptosis and hypoplastic teeth  
51 Peripheral arterial vascular disease  
52 Myocardial infarction due to demand ischaemia

1 Pulmonary heart disease  
2 Congenital heart disease  
3 Congenital cardiospasm  
4 Congenital heart block  
5 Congenital cardiomegaly  
6 Congenital heart block, unspecified  
7 Congenital heart block NOS  
8 Congenital anomaly of myocardium  
9 Congenital aneurysm of heart  
10 Congenital epicardial cyst  
11 Congenital anomaly of heart valve  
12 Acyanotic congenital heart disease NOS  
13 Congenital heart anomaly NOS  
14 [X]Other congenital malformations of cardiac septa  
15 [X]Other specified congenital malformations of the heart  
16 Congenital cardiac failure  
17 Congenital heart disease in pregnancy  
18 Congenital insufficiency of heart valve NEC  
19 Congenital heart disease, septal and bulbar anomalies  
20 Congenital absence of pericardium  
21 Cyanotic congenital heart disease  
22 Congenital anomaly of cardiovascular system  
23 Congenital conductive hearing loss  
24 [X]Congenital malforms of cardiac chambers+connections unsp  
25 Congenital cardiovasc dis - unsp whether in preg/puerperium  
26 Congenital cardiovascular disorder during pregnancy - baby delivered  
27 Congenital cardiovascular disorder during pregnancy - baby not yet delivered  
28 Congenital cardiovascular disorder in the puerperium - baby delivered during current episode of care  
29 Congenital cardiovascular disorder in the puerperium - baby delivered during previous episode of care  
30 Congenital cardiovascular disorder in preg/childb/puerp NOS  
31 Congenital cardiovascular disorders during pregnancy, childbirth and the puerperium  
32 Congenital complete atrioventricular heart block  
33 Congenital heart anomaly NOS  
34 Congenital incomplete atrio-ventricular heart block  
35 Congenital malforms of cardiac chambers+connections unsp  
36 Congenital dextroposition of heart  
37 [RFC] Chronic heart disease (CHD)  
38 [RFC] Congenital heart disease  
39 Mental retardation, congenital heart disease, blepharophimosis, blepharoptosis and hypoplastic teeth  
40 Percutaneous transluminal ablation of congenital heart malformation  
41 Congenital anomaly of heart  
42 CHD - Congenital heart disease  
43 Coloboma, congenital heart disease, choanal atresia, growth retardation, genital hypoplasia, ear and hearing a  
44 Congenital atresia of cardiac vein  
45 Congenital malposition of cardiac apex  
46 CHD - Coronary heart disease  
47 Congenital incomplete atrioventricular heart block  
48 Congenital abnormality of cardiac connection  
49 Heart failure due to end stage congenital heart disease  
50 Congenital anomaly of cardiac chamber

1 Intellectual disability, congenital heart disease, blepharophimosis, blepharoptosis and hypoplastic teeth  
2 Acute congestive heart failure  
3 Congestive heart failure  
4 Acute heart failure  
5 Heart failure  
6 Cardiac failure  
7 Chronic congestive heart failure  
8 Right heart failure  
9 H/O: heart failure  
10 Hypertensive heart and renal disease with renal failure  
11 Decompensated cardiac failure  
12 Compensated cardiac failure  
13 Post cardiac operation heart failure NOS  
14 Cardiac failure following abortive pregnancy  
15 Cardiorespiratory failure  
16 Heart transplant failure and rejection  
17 Heart-lung transplant failure and rejection  
18 Cardiorespiratory failure as a complication of care  
19 Heart failure as a complication of care  
20 Heart failure NOS  
21 Neonatal cardiac failure  
22 Cardiac failure therapy  
23 H/O: Heart failure in last year  
24 Congestive cardiac failure  
25 Biventricular congestive heart failure  
26 Heart failure confirmed  
27 Emergency hospital admission for heart failure  
28 Congestive heart failure due to valvular disease  
29 Cardiac failure NOS  
30 Benign hypertensive heart disease with congestive cardiac failure  
31 Benign hypertensive heart disease without CCF  
32 Malignant hypertensive heart disease with congestive cardiac failure  
33 Malignant hypertensive heart disease without congestive heart failure  
34 Hypertensive heart disease NOS with CCF  
35 Hypertensive heart disease NOS without CCF  
36 Hypertensive heart and renal disease with (congestive) heart failure  
37 Hypertensive heart and renal disease with both (congestive) heart failure and renal failure  
38 [RFC] Cardiac failure  
39 Heart failure with normal ejection fraction  
40 HFNEF - heart failure with normal ejection fraction  
41 Emergency heart failure admission since last appointment  
42 Heart failure with preserved ejection fraction  
43 On optimal heart failure therapy  
44 Acute left heart failure  
45 Chronic left-sided congestive heart failure  
46 High output heart failure  
47 Chronic right-sided heart failure  
48 Congestive cardiac failure  
49 CCF - Congestive cardiac failure  
50 CHF - Congestive heart failure

1 Right heart failure secondary to left heart failure  
2 Hypertensive heart failure  
3 Chronic heart failure  
4 Hypertensive heart disease without congestive heart failure  
5 Chronic right-sided congestive heart failure  
6 HF - Heart failure  
7 Left heart failure  
8 Left-sided heart failure  
9 Chronic left-sided heart failure  
10 History of heart failure  
11 Refractory heart failure  
12 Acute right-sided heart failure  
13 Systolic heart failure  
14 Diastolic heart failure  
15 Decompensated chronic heart failure  
16 Right heart failure due to pulmonary hypertension  
17 Congestive heart failure due to left ventricular systolic dysfunction  
18 Chronic systolic heart failure  
19 Chronic diastolic heart failure  
20 Heart failure with preserved ejection fraction  
21 Acute exacerbation of chronic congestive heart failure  
22 Symptomatic congestive heart failure  
23 Heart failure with reduced ejection fraction  
24 Heart failure with reduced ejection fraction due to coronary artery disease  
25 Heart failure with reduced ejection fraction due to myocarditis  
26 Heart failure with reduced ejection fraction due to cardiomyopathy  
27 Heart failure with reduced ejection fraction due to heart valve disease  
28 Congestive heart failure with right heart failure  
29 Exacerbation of congestive heart failure  
30 Chronic combined systolic and diastolic heart failure  
31 Heart failure with mid range ejection fraction  
32 Low output heart failure due to and following Fontan operation  
33 Acute on chronic right-sided congestive heart failure  
34  
35  
36  
37  
38  
39  
40  
41  
42  
43  
44  
45  
46  
47  
48  
49  
50  
51  
52  
53  
54  
55  
56  
57  
58  
59  
60

1  
2  
3  
4  
5  
6  
7  
8  
9  
10  
11  
12  
13  
14  
15  
16  
17  
18  
19  
20  
21  
22  
23  
24  
25  
26  
27  
28  
29  
30  
31  
32  
33  
34  
35  
36  
37  
38  
39  
40  
41  
42  
43  
44  
45  
46  
47  
48  
49  
50  
51  
52  
53  
54  
55  
56  
57  
58  
59  
60

For peer review only

1  
2  
3  
4  
5  
6  
7  
8  
9  
10  
11  
12  
13  
14  
15  
16  
17  
18  
19  
20  
21  
22  
23  
24  
25  
26  
27  
28  
29  
30  
31  
32  
33  
34  
35  
36  
37  
38  
39  
40  
41  
42  
43  
44  
45  
46  
47  
48  
49  
50  
51  
52  
53  
54  
55  
56  
57  
58  
59  
60

For peer review only



1  
2  
3  
4  
5  
6  
7  
8  
9  
10  
11  
12  
13  
14  
15  
16  
17  
18  
19  
20  
21  
22  
23  
24  
25  
26  
27  
28  
29  
30  
31  
32  
33  
34  
35  
36  
37  
38  
39  
40  
41  
42  
43  
44  
45  
46  
47  
48  
49  
50  
51  
52  
53  
54  
55  
56  
57  
58  
59  
60

For peer review only

1  
2  
3  
4  
5  
6  
7  
8  
9  
10  
11  
12  
13  
14  
15  
16  
17  
18  
19  
20  
21  
22  
23  
24  
25  
26  
27  
28  
29  
30  
31  
32  
33  
34  
35  
36  
37  
38  
39  
40  
41  
42  
43  
44  
45  
46  
47  
48  
49  
50  
51  
52  
53  
54  
55  
56  
57  
58  
59  
60

For peer review only

1  
2  
3  
4  
5  
6  
7  
8  
9  
10  
11  
12  
13  
14  
15  
16  
17  
18  
19  
20  
21  
22  
23  
24  
25  
26  
27  
28  
29  
30  
31  
32  
33  
34  
35  
36  
37  
38  
39  
40  
41  
42  
43  
44  
45  
46  
47  
48  
49  
50  
51  
52  
53  
54  
55  
56  
57  
58  
59  
60

For peer review only

1  
2  
3  
4  
5  
6  
7  
8  
9  
10  
11  
12  
13  
14  
15  
16  
17  
18  
19  
20  
21  
22  
23  
24  
25  
26  
27  
28  
29  
30  
31  
32  
33  
34  
35  
36  
37  
38  
39  
40  
41  
42  
43  
44  
45  
46  
47  
48  
49  
50  
51  
52  
53  
54  
55  
56  
57  
58  
59  
60

For peer review only

1  
2  
3  
4  
5  
6  
7  
8  
9  
10  
11  
12  
13  
14  
15  
16  
17  
18  
19  
20  
21  
22  
23  
24  
25  
26  
27  
28  
29  
30  
31  
32  
33  
34  
35  
36  
37  
38  
39  
40  
41  
42  
43  
44  
45  
46  
47  
48  
49  
50  
51  
52  
53  
54  
55  
56  
57  
58  
59  
60

For peer review only

1  
2  
3  
4  
5  
6  
7  
8  
9  
10  
11  
12  
13  
14  
15  
16  
17  
18  
19  
20  
21  
22  
23  
24  
25  
26  
27  
28  
29  
30  
31  
32  
33  
34  
35  
36  
37  
38  
39  
40  
41  
42  
43  
44  
45  
46  
47  
48  
49  
50  
51  
52  
53  
54  
55  
56  
57  
58  
59  
60

For peer review only

1  
2  
3  
4  
5  
6  
7  
8  
9  
10  
11  
12  
13  
14  
15  
16  
17  
18  
19  
20  
21  
22  
23  
24  
25  
26  
27  
28  
29  
30  
31  
32  
33  
34  
35  
36  
37  
38  
39  
40  
41  
42  
43  
44  
45  
46  
47  
48  
49  
50  
51  
52  
53  
54  
55  
56  
57  
58  
59  
60

For peer review only

1  
2  
3  
4  
5  
6  
7  
8  
9  
10  
11  
12  
13  
14  
15  
16  
17  
18  
19  
20  
21  
22  
23  
24  
25  
26  
27  
28  
29  
30  
31  
32  
33  
34  
35  
36  
37  
38  
39  
40  
41  
42  
43  
44  
45  
46  
47  
48  
49  
50  
51  
52  
53  
54  
55  
56  
57  
58  
59  
60

For peer review only



1  
2  
3  
4  
5  
6  
7  
8  
9  
10  
11  
12  
13  
14  
15  
16  
17  
18  
19  
20  
21  
22  
23  
24  
25  
26  
27  
28  
29  
30  
31  
32  
33  
34  
35  
36  
37  
38  
39  
40  
41  
42  
43  
44  
45  
46  
47  
48  
49  
50  
51  
52  
53  
54  
55  
56  
57  
58  
59  
60

For peer review only

1  
2  
3  
4  
5  
6  
7  
8  
9  
10  
11  
12  
13  
14  
15  
16  
17  
18  
19  
20  
21  
22  
23  
24  
25  
26  
27  
28  
29  
30  
31  
32  
33  
34  
35  
36  
37  
38  
39  
40  
41  
42  
43  
44  
45  
46  
47  
48  
49  
50  
51  
52  
53  
54  
55  
56  
57  
58  
59  
60

me

For peer review only

1  
2  
3  
4  
5  
6  
7  
8  
9  
10  
11  
12  
13  
14  
15  
16  
17  
18  
19  
20  
21  
22  
23  
24  
25  
26  
27  
28  
29  
30  
31  
32  
33  
34  
35  
36  
37  
38  
39  
40  
41  
42  
43  
44  
45  
46  
47  
48  
49  
50  
51  
52  
53  
54  
55  
56  
57  
58  
59  
60

For peer review only

me

|    |             |
|----|-------------|
| 1  |             |
| 2  | ICD-10 code |
| 3  | I48.0       |
| 4  | I48.1       |
| 5  | I48.11      |
| 6  | I48.19      |
| 7  | I48.2       |
| 8  | I48.20      |
| 9  | I48.21      |
| 10 | I48.3       |
| 11 | I48.4       |
| 12 | I48.9       |
| 13 | I48.91      |
| 14 | I48.92      |
| 15 | I82.0       |
| 16 | I82.1       |
| 17 | I82.2       |
| 18 | I82.3       |
| 19 | I82.4       |
| 20 | I82.5       |
| 21 | I82.6       |
| 22 | I82.A       |
| 23 | I82.B       |
| 24 | I82.C       |
| 25 | I82.8       |
| 26 | I82.9       |
| 27 | I20         |
| 28 | I20.0       |
| 29 | I20.1       |
| 30 | I20.8       |
| 31 | I20.9       |
| 32 | I21         |
| 33 | I21.0       |
| 34 | I21.1       |
| 35 | I21.2       |
| 36 | I21.3       |
| 37 | I21.4       |
| 38 | I21.9       |
| 39 | I22         |
| 40 | I22.0       |
| 41 | I22.1       |
| 42 | I22.8       |
| 43 | I22.9       |
| 44 | I23         |
| 45 | I23.0       |
| 46 | I23.1       |
| 47 | I23.2       |
| 48 | I23.3       |
| 49 | I23.4       |
| 50 | I23.5       |
| 51 | I23.6       |

For peer review only

|    |         |
|----|---------|
| 1  |         |
| 2  | I23.8   |
| 3  | I24     |
| 4  | I24.0   |
| 5  | I24.1   |
| 6  | I24.8   |
| 7  | I24.9   |
| 8  | I24.9   |
| 9  | I25     |
| 10 | I25.1   |
| 11 | I25.2   |
| 12 | I25.5   |
| 13 | I25.6   |
| 14 | I25.6   |
| 15 | I25.8   |
| 16 | I25.9   |
| 17 | Z95.5   |
| 18 | Q20.0   |
| 19 | Q20.3   |
| 20 | Q20.3   |
| 21 | Q20.1   |
| 22 | Q20.5   |
| 23 | Q20.4   |
| 24 | Q20.4   |
| 25 | Q20.2   |
| 26 | Q22.0   |
| 27 | Q22.9   |
| 28 | Q23.4   |
| 29 | Q22.6   |
| 30 | Q21.3   |
| 31 | Q21.2   |
| 32 | Q21.2   |
| 33 | Q21.2   |
| 34 | Q22.5   |
| 35 | Q25.1   |
| 36 | Q26.2   |
| 37 | Q26.2   |
| 38 | Q26.3   |
| 39 | Q21.0   |
| 40 | I50.1   |
| 41 | I50.20  |
| 42 | I50.21  |
| 43 | I50.21  |
| 44 | I50.22  |
| 45 | I50.23  |
| 46 | I50.30  |
| 47 | I50.31  |
| 48 | I50.31  |
| 49 | I50.32  |
| 50 | I50.33  |
| 51 | I50.40  |
| 52 | I50.41  |
| 53 | I50.41  |
| 54 | I50.42  |
| 55 | I50.43  |
| 56 | I50.810 |
| 57 | I50.811 |
| 58 | I50.812 |
| 59 | I50.813 |
| 60 | I50.814 |

For peer review only

1  
2 150.82  
3 150.83  
4 150.84  
5 150.89  
6 150.9  
7  
8  
9  
10  
11  
12  
13  
14  
15  
16  
17  
18  
19  
20  
21  
22  
23  
24  
25  
26  
27  
28  
29  
30  
31  
32  
33  
34  
35  
36  
37  
38  
39  
40  
41  
42  
43  
44  
45  
46  
47  
48  
49  
50  
51  
52  
53  
54  
55  
56  
57  
58  
59  
60

For peer review only

|    |                                                                                                      |
|----|------------------------------------------------------------------------------------------------------|
| 1  |                                                                                                      |
| 2  | Term                                                                                                 |
| 3  | Paroxysmal atrial fibrillation                                                                       |
| 4  | Persistent atrial fibrillation                                                                       |
| 5  | Longstanding persistent atrial fibrillation                                                          |
| 6  | Other persistent atrial fibrillation                                                                 |
| 7  | Chronic atrial fibrillation                                                                          |
| 8  | Chronic atrial fibrillation..... unspecified                                                         |
| 9  | Permanent atrial fibrillation                                                                        |
| 10 | Typical atrial flutter                                                                               |
| 11 | Atypical atrial flutter                                                                              |
| 12 | Unspecified atrial fibrillation and atrial flutter                                                   |
| 13 | Unspecified atrial fibrillation                                                                      |
| 14 | Unspecified atrial flutter                                                                           |
| 15 | Budd-Chiari syndrome                                                                                 |
| 16 | Thrombophlebitis migrans                                                                             |
| 17 | Embolism and thrombosis of vena cava and other thoracic veins                                        |
| 18 | Embolism and thrombosis of renal vein                                                                |
| 19 | Acute embolism and thrombosis of deep veins of lower extremity                                       |
| 20 | Chronic embolism and thrombosis of deep veins of lower extremity                                     |
| 21 | Acute embolism and thrombosis of veins of upper extremity                                            |
| 22 | Embolism and thrombosis of axillary vein                                                             |
| 23 | Embolism and thrombosis of subclavian vein                                                           |
| 24 | Embolism and thrombosis of internal jugular vein                                                     |
| 25 | Embolism and thrombosis of other specified veins                                                     |
| 26 | Embolism and thrombosis of unspecified vein                                                          |
| 27 | angina pectoris                                                                                      |
| 28 | unstable angina                                                                                      |
| 29 | angina pectoris with documented spasm                                                                |
| 30 | other forms of angina pectoris                                                                       |
| 31 | angina pectoris, unspecified                                                                         |
| 32 | acute myocardial infarction                                                                          |
| 33 | acute transmural myocardial infarction of anterior wall                                              |
| 34 | acute transmural myocardial infarction of inferior wall                                              |
| 35 | acute transmural myocardial infarction of other sites                                                |
| 36 | acute transmural myocardial infarction of unspecified site                                           |
| 37 | acute subendocardial myocardial infarction                                                           |
| 38 | acute myocardial infarction, unspecified                                                             |
| 39 | subsequent myocardial infarction                                                                     |
| 40 | subsequent myocardial infarction of anterior wall                                                    |
| 41 | subsequent myocardial infarction of inferior wall                                                    |
| 42 | subsequent myocardial infarction of other sites                                                      |
| 43 | subsequent myocardial infarction of unspecified site                                                 |
| 44 | certain current complications following acute myocardial infarction                                  |
| 45 | haemopericardium as current complication following acute myocardial infarction                       |
| 46 | atrial septal defect as current complication following acute myocardial infarction                   |
| 47 | ventricular septal defect as current complication following acute myocardial infarction              |
| 48 | rupture of cardiac wall without haemopericardium as current complication following acute myocardia   |
| 49 | rupture of chordae tendineae as current complication following acute myocardial infarction           |
| 50 | rupture of papillary muscle as current complication following acute myocardial infarction            |
| 51 | thrombosis of atrium, auricular appendage, and ventricle as current complications following acute my |
| 52 |                                                                                                      |
| 53 |                                                                                                      |
| 54 |                                                                                                      |
| 55 |                                                                                                      |
| 56 |                                                                                                      |
| 57 |                                                                                                      |
| 58 |                                                                                                      |
| 59 |                                                                                                      |
| 60 |                                                                                                      |

1 other current complications following acute myocardial infarction  
2 other acute ischaemic heart diseases  
3 coronary thrombosis not resulting in myocardial infarction  
4 dressler's syndrome  
5 other forms of acute ischaemic heart disease  
6 acute ischaemic heart disease, unspecified  
7 chronic ischaemic heart disease  
8 atherosclerotic heart disease  
9 old myocardial infarction  
10 ischaemic cardiomyopathy  
11 silent myocardial ischaemia  
12 other forms of chronic ischaemic heart disease  
13 chronic ischaemic heart disease, unspecified  
14 presence of coronary angioplasty implant and graft  
15 Common arterial trunk  
16 Discordant ventriculoarterial connection  
17 Double outlet right ventricle  
18 Discordant atrioventricular connection  
19 Double inlet left ventricle  
20 Double outlet left ventricle  
21 Pulmonary valve atresia  
22 Congenital malformation of tricuspid valve, unspecified  
23 Hypoplastic left heart syndrome  
24 Hypoplastic right heart syndrome  
25 Tetralogy of Fallot  
26 Atrioventricular septal defect  
27 Atrioventricular septal defect  
28 Ebstein's anomaly  
29 Coarctation of the aorta  
30 Total anomalous pulmonary venous connection  
31 Partial anomalous pulmonary venous connection  
32 Ventricular septal defect  
33 Left ventricular failure, unspecified  
34 Unspecified systolic (congestive) heart failure  
35 Acute systolic (congestive) heart failure  
36 Chronic systolic (congestive) heart failure  
37 Acute on chronic systolic (congestive) heart failure  
38 Unspecified diastolic (congestive) heart failure  
39 Acute diastolic (congestive) heart failure  
40 Chronic diastolic (congestive) heart failure  
41 Acute on chronic diastolic (congestive) heart failure  
42 Unspecified combined systolic (congestive) and diastolic (congestive) heart failure  
43 Acute combined systolic (congestive) and diastolic (congestive) heart failure  
44 Chronic combined systolic (congestive) and diastolic (congestive) heart failure  
45 Acute on chronic combined systolic (congestive) and diastolic (congestive) heart failure  
46 Right heart failure, unspecified  
47 Acute right heart failure  
48 Chronic right heart failure  
49 Acute on chronic right heart failure  
50 Right heart failure due to left heart failure



- 1
- 2     Biventricular heart failure
- 3     High output heart failure
- 4     End stage heart failure
- 5     Heart failure, unspecified
- 6     Heart failure, unspecified
- 7

- 8
- 9
- 10
- 11
- 12
- 13
- 14
- 15
- 16
- 17
- 18
- 19
- 20
- 21
- 22
- 23
- 24
- 25
- 26
- 27
- 28
- 29
- 30
- 31
- 32
- 33
- 34
- 35
- 36
- 37
- 38
- 39
- 40
- 41
- 42
- 43
- 44
- 45
- 46
- 47
- 48
- 49
- 50
- 51
- 52
- 53
- 54
- 55
- 56
- 57
- 58
- 59
- 60

For peer review only

1  
2  
3  
4  
5  
6  
7  
8  
9  
10  
11  
12  
13  
14  
15  
16  
17  
18  
19  
20  
21  
22  
23  
24  
25  
26  
27  
28  
29  
30  
31  
32  
33  
34  
35  
36  
37  
38  
39  
40  
41  
42  
43  
44  
45  
46  
47  
48  
49  
50  
51  
52  
53  
54  
55  
56  
57  
58  
59  
60

For peer review only

al  
/

|    |                |
|----|----------------|
| 1  |                |
| 2  | Medcodeid      |
| 3  | 17316019       |
| 4  | 38322017       |
| 5  | 43768016       |
| 6  | 54939014       |
| 7  | 81307015       |
| 8  | 86957016       |
| 9  | 103605014      |
| 10 | 110356018      |
| 11 | 119846018      |
| 12 | 135166013      |
| 13 | 205225016      |
| 14 | 249896014      |
| 15 | 291673013      |
| 16 | 291674019      |
| 17 | 291741010      |
| 18 | 292496015      |
| 19 | 293394013      |
| 20 | 303806010      |
| 21 | 303825013      |
| 22 | 303826014      |
| 23 | 303832016      |
| 24 | 303833014      |
| 25 | 303834015      |
| 26 | 303838017      |
| 27 | 303839013      |
| 28 | 303842019      |
| 29 | 303843012      |
| 30 | 303844018      |
| 31 | 303845017      |
| 32 | 303846016      |
| 33 | 303848015      |
| 34 | 303849011      |
| 35 | 303853013      |
| 36 | 303854019      |
| 37 | 303855018      |
| 38 | 303884010      |
| 39 | 303902013      |
| 40 | 304056012      |
| 41 | 304058013      |
| 42 | 304063012      |
| 43 | 354340015      |
| 44 | 354508018      |
| 45 | 354540019      |
| 46 | 354621016      |
| 47 | 396706011      |
| 48 | 1227517019     |
| 49 | 1230030015     |
| 50 | 84371000006110 |
| 51 | 84551000006113 |
| 52 |                |
| 53 |                |
| 54 |                |
| 55 |                |
| 56 |                |
| 57 |                |
| 58 |                |
| 59 |                |
| 60 |                |

For peer review only

1  
2 84741000006118  
3 127091000006118  
4 280531000006119  
5 312531000006111  
6 312541000006118  
7  
8 313751000006119  
9 677461000006115  
10 677471000006110  
11 677481000006113  
12 677561000006119  
13 677621000006112  
14 678001000006110  
15 678061000006111  
16 703481000006116  
17 710221000006113  
18 771391000006117  
19 821441000006115  
20 821461000006116  
21 821471000006111  
22 821481000006114  
23 821711000006113  
24 913831000006114  
25 913851000006119  
26 914261000006119  
27 914271000006114  
28 1847541000006113  
29 2687831000006115  
30 2900601000006112  
31 3097031000006111  
32 3222371000006111  
33 3347091000006118  
34 4059091000006113  
35 5093351000006116  
36 5093381000006112  
37 5096141000006114  
38 5481301000006114  
39 5912131000006112  
40 7598001000006110  
41 12717101000006112  
42 3528309015  
43 618431000000114  
44 618441000000117  
45 618451000000119  
46 618461000000116  
47 618471000000111  
48 618481000000113  
49 618491000000110  
50 618501000000116  
51 618511000000119  
52 618521000000113

For peer review only

1  
2 1940501000006119  
3 1940511000006116  
4 1940521000006112  
5 1940531000006110  
6 1940541000006117  
7  
8 1940551000006115  
9 1940621000006111  
10 1940631000006114  
11 1940641000006116  
12 1940651000006119  
13 1940661000006117  
14 1940671000006112  
15  
16 7147741000006114  
17 7174791000006111  
18 7174851000006111  
19  
20 7643311000006115  
21 8104231000006115  
22 8104261000006112  
23 8104301000006115  
24 8104381000006112  
25 8104451000006111  
26 8104551000006112  
27  
28 8294821000006118  
29 108730018  
30 299665018  
31 299673010  
32 305944016  
33 305945015  
34 305947011  
35 305949014  
36 354505015  
37 354521013  
38 398347019  
39 3634081012  
40 177311000006112  
41 215521000000116  
42 641491000006116  
43 741701000006114  
44 789941000006117  
45 811521000006115  
46 3902031000006117  
47 7643331000006114  
48 12704471000006116  
49 278834012  
50 278835013  
51 354417015  
52 402249011  
53 509111010  
54 480871000006117  
55 619541000006116  
56  
57  
58  
59  
60

For peer review only

1  
2 641471000006117  
3 3245861000006116  
4 3245881000006114  
5 3331291000006117  
6 3973811000006118  
7 3973841000006119  
8 5094161000006119  
9 5094171000006114  
10 7043231000006112  
11 84921000006110  
12 913841000006116  
13 914031000006118  
14 2767383018  
15 2767385013  
16 2773184015  
17 304071000000115  
18 304091000000116  
19 304111000000114  
20 557811000000119  
21 557831000000110  
22 595871000000110  
23 595931000000116  
24 595991000000115  
25 596051000000115  
26 596131000000114  
27 596191000000110  
28 596261000000111  
29 596321000000110  
30 596401000000111  
31 886641000006117  
32 994421000006111  
33 994441000006116  
34 2002961000006113  
35 2002971000006118  
36 3245841000006115  
37 3842511000006119  
38 7480371000006113  
39 7615331000006115  
40 7615361000006112  
41 7714891000006118  
42 7714921000006112  
43 7966611000006114  
44 7966641000006113  
45 7966691000006116  
46 7966761000006115  
47 7966791000006111  
48 8027391000006115  
49 8027491000006113  
50 8030421000006114  
51 8030431000006112

For peer review only

1  
2 8040661000006119  
3 8040681000006112  
4 8044061000006119  
5 8212401000006115  
6 8345931000006110  
7 8346001000006110  
8 8346021000006117  
9 14174321000006116  
10  
11 354316011  
12 7954351000006118  
13 7103511000006119  
14 117168016  
15 1549841000006116  
16 1550021000006110  
17 177251000006119  
18 177341000006111  
19 1905531000006112  
20 2189151000000117  
21 2191221000000118  
22 2197961000000113  
23 2198001000000111  
24 2198141000000110  
25 2209021000000112  
26 2209101000000119  
27 2234541000000115  
28 2234621000000111  
29 272320011  
30 272325018  
31 272326017  
32 272327014  
33 272389014  
34 284213011  
35 324973015  
36 353974015  
37 354610013  
38 354612017  
39 354613010  
40 354615015  
41 354616019  
42 354617011  
43 354618018  
44 354619014  
45 354621016  
46 354623018  
47 354624012  
48 354627017  
49 354628010  
50 3647021000006114  
51 3647031000006112  
52 3647051000006117  
53  
54  
55  
56  
57  
58  
59  
60

For peer review only

1  
2 3647061000006115  
3 3647071000006110  
4 366671000000118  
5 372621000000114  
6 380061000000118  
7 380101000000116  
8 386181000000111  
9 387351000000117  
10 387911000000115  
11 394365013  
12 399381000000115  
13 413415016  
14 422992018  
15 424791000006110  
16 4542501000006119  
17 460644012  
18 4668951000006113  
19 4668961000006110  
20 4668971000006115  
21 4668981000006117  
22 4669011000006116  
23 4669051000006115  
24 4669451000006113  
25 478131000006115  
26 500371000006119  
27 501594013  
28 5486891000006118  
29 7091541000006113  
30 754061000006111  
31 7688001000006116  
32 7688041000006119  
33 7688541000006114  
34 900121000006113  
35 90461000006118  
36 90471000006113  
37 906351000006116  
38 988961000006115  
39 5063371000006112  
40  
41  
42  
43  
44  
45  
46  
47  
48  
49  
50  
51  
52  
53  
54  
55  
56  
57  
58  
59  
60

For peer review only



|    |                                                             |
|----|-------------------------------------------------------------|
| 1  |                                                             |
| 2  | Term                                                        |
| 3  | Nephroptosis                                                |
| 4  | Juvenile nephropathic cystinosis                            |
| 5  | Balkan nephropathy                                          |
| 6  | Nephrosclerosis                                             |
| 7  | Congenital nephrotic syndrome                               |
| 8  | Nephrotic syndrome                                          |
| 9  | Infantile nephropathic cystinosis                           |
| 10 | Amyloid nephropathy of Ostertag                             |
| 11 | Nephrogenic diabetes insipidus                              |
| 12 | Acquired nephrogenic diabetes insipidus                     |
| 13 | Diabetic nephropathy                                        |
| 14 | Haemorrhagic nephrosonephritis                              |
| 15 | [M]Epithelial nephroblastoma                                |
| 16 | [M]Mesenchymal nephroblastoma                               |
| 17 | [M]Mesonephroma NOS                                         |
| 18 | Diabetes mellitus with nephropathy NOS                      |
| 19 | Gouty nephropathy                                           |
| 20 | Nephritis, nephrosis and nephrotic syndrome                 |
| 21 | Nephrotic syndrome with proliferative glomerulonephritis    |
| 22 | Nephrotic syndrome with membranous glomerulonephritis       |
| 23 | Nephrotic syndrome, minor glomerular abnormality            |
| 24 | Nephrotic syndrome, focal and segmental glomerular lesions  |
| 25 | Nephrotic syndrome, diffuse membranous glomerulonephritis   |
| 26 | Nephrotic syndrome, dense deposit disease                   |
| 27 | Nephrotic syndrome, diffuse crescentic glomerulonephritis   |
| 28 | Congenital Finnish nephrosis                                |
| 29 | Congenital nephrotic syndrome NOS                           |
| 30 | Nephrotic syndrome in diseases EC                           |
| 31 | Nephrotic syndrome in amyloidosis                           |
| 32 | Nephrotic syndrome in diabetes mellitus                     |
| 33 | Nephrotic syndrome in malaria                               |
| 34 | Nephrotic syndrome in polyarteritis nodosa                  |
| 35 | Nephrotic syndrome associated with another disorder         |
| 36 | Nephrotic syndrome with other pathological kidney lesions   |
| 37 | Nephrotic syndrome NOS                                      |
| 38 | Berger's IgA or IgG nephropathy                             |
| 39 | Other nephritis and nephrosis unspecified                   |
| 40 | Other specified nephritis, nephrosis or nephrotic syndrome  |
| 41 | Nephritis, nephrosis and nephrotic syndrome NOS             |
| 42 | Chronic pyonephrosis                                        |
| 43 | Congenital nephrotic syndrome with focal glomerulosclerosis |
| 44 | Clinical diabetic nephropathy                               |
| 45 | Chronic cyclosporin A nephrotoxicity                        |
| 46 | Chronic transplant nephropathy                              |
| 47 | Nephrotic syndrome with minimal change glomerulonephritis   |
| 48 | [M]Nephroblastoma NOS                                       |
| 49 | Chronic lithium nephrotoxicity                              |
| 50 | Type 1 diabetes mellitus with nephropathy                   |
| 51 | Type 2 diabetes mellitus with nephropathy                   |

1 Type I diabetes mellitus with nephropathy  
2 Steroid-sensitive nephrotic syndrome  
3 Non-insulin dependent diabetes mellitus with nephropathy  
4 Malignant mesonephroma  
5 [M]Mesonephromas  
6 [M]Nephromas and nephroblastomas  
7 Nephrotic syndrome, diffuse mesangial proliferative glomerulonephritis  
8 Nephrotic syndrome, diffuse mesangiocapillary glomerulonephritis  
9 Nephrotic syndrome, diffuse endocapillary proliferative glomerulonephritis  
10 Nephrotic syndrome in systemic lupus erythematosus  
11 Nephrotic syndrome with membranoproliferative glomerulonephritis  
12 Nephrocalcinosis  
13 Nephropathy - chronic  
14 Microcystic type congenital nephrotic syndrome  
15 Finnish congenital nephrotic syndrome  
16 Insulin dependent diabetes mellitus with nephropathy  
17 Hereditary nephropathy NEC,focal+segmnt glomerular lesion  
18 Hereditary nephropathy, NEC, dense deposit disease  
19 Hereditary nephropathy, unspecif morphological changes  
20 Hereditary nephropathy, NEC,difus crescentic glomnephritis  
21 Hereditary nephropathy NEC,difus membran glomerulnephritis  
22 Insulin dependent diabetes mellitus with nephropathy  
23 Type I diabetes mellitus with nephropathy  
24 Diabetes type 2 with nephropathy  
25 Type II diabetes mellitus with nephropathy  
26 Wilms' tumour and nephrotic syndrome with pseudohermaphroditism  
27 Mesoblastic nephroma  
28 Nephroblastoma  
29 Granulomatous sarcoid nephropathy  
30 Minimal change nephrotic syndrome  
31 NS - Nephrotic syndrome  
32 Bilateral hydronephrosis  
33 Steroid-resistant nephrotic syndrome  
34 Steroid-dependent nephrotic syndrome  
35 Chronic allograft nephropathy  
36 Nephrotic range proteinuria  
37 Nephroblastoma  
38 Childhood nephrotic syndrome  
39 Nephritis, nephrosis and nephrotic syndrome  
40 MCKD - Multicystic kidney disease  
41 CKD stage 3 with proteinuria  
42 CKD stage 3 without proteinuria  
43 CKD stage 3A with proteinuria  
44 CKD stage 3A without proteinuria  
45 CKD stage 3B with proteinuria  
46 CKD stage 3B without proteinuria  
47 CKD stage 4 with proteinuria  
48 CKD stage 4 without proteinuria  
49 CKD stage 5 with proteinuria  
50 CKD stage 5 without proteinuria

1  
2 CKD G4A1 - chronic kidney disease with glomerular filtration rate category G4 and albuminuria category A1  
3 CKD G4A2 - chronic kidney disease with glomerular filtration rate category G4 and albuminuria category A2  
4 CKD G4A3 - chronic kidney disease with glomerular filtration rate category G4 and albuminuria category A3  
5 CKD G5A1 - chronic kidney disease with glomerular filtration rate category G5 and albuminuria category A1  
6 CKD G5A2 - chronic kidney disease with glomerular filtration rate category G5 and albuminuria category A2  
7 CKD G5A3 - chronic kidney disease with glomerular filtration rate category G5 and albuminuria category A3  
8 CKD G3aA1 - chronic kidney disease with glomerular filtration rate category G3a and albuminuria category A1  
9 CKD G3aA2 - chronic kidney disease with glomerular filtration rate category G3a and albuminuria category A2  
10 CKD G3aA3 - chronic kidney disease with glomerular filtration rate category G3a and albuminuria category A3  
11 CKD G3bA1 - chronic kidney disease with glomerular filtration rate category G3b and albuminuria category A1  
12 CKD G3bA2 - chronic kidney disease with glomerular filtration rate category G3b and albuminuria category A2  
13 CKD G3bA3 - chronic kidney disease with glomerular filtration rate category G3b and albuminuria category A3  
14  
15 CKD stage 1  
16 CKD stage 3  
17 CKD stage 5  
18  
19 CKD - chronic kidney disease  
20 CKD (chronic kidney disease) stage 3 with proteinuria  
21 CKD (chronic kidney disease) stage 3 without proteinuria  
22 CKD (chronic kidney disease) stage 3A with proteinuria  
23 CKD (chronic kidney disease) stage 3B with proteinuria  
24 CKD (chronic kidney disease) stage 4 with proteinuria  
25 CKD (chronic kidney disease) stage 5 without proteinuria  
26 eGFR (estimated glomerular filtration rate) using CKD-Epi (Chronic Kidney Disease Epidemiology Collaboration)  
27 Malignant hypertensive renal disease  
28 Hypertensive renal disease with renal failure  
29 Hypertensive heart and renal disease with renal failure  
30 Unspecified renal disease in pregnancy unspecified  
31 Unspecified renal disease in pregnancy - delivered  
32 Unspecified renal disease in pregnancy - not delivered  
33 Unspecified renal disease in pregnancy NOS  
34 Renal disorders in systemic disease  
35 Renal involvement in malignant disease  
36 Unspecified renal disease in pregnancy  
37 POS-S Renal (Palliative care Outcome Scale symptom list for end-stage renal disease) score  
38 Renal tubulo-interstitial disorders in neoplastic diseases  
39 End stage renal disease  
40 End-stage renal disease  
41 Hypertensive heart and renal disease with (congestive) heart failure  
42 Hypertensive heart and renal disease with both (congestive) heart failure and renal failure  
43 H/O: renal disease  
44 Cardiorenal disease  
45 Chronic renal disease  
46 End-stage renal disease  
47 Other specified compensation for renal failure  
48 Compensation for renal failure NOS  
49 Acute-on-chronic renal failure  
50 Congenital renal failure  
51 Chronic renal failure  
52 Anaemia of chronic renal failure  
53 Dialysis for renal failure  
54  
55  
56  
57  
58  
59  
60

1 End stage renal failure  
2 ESCRF - End stage chronic renal failure  
3 End stage chronic renal failure  
4 Hepatorenal failure  
5 Chronic renal failure syndrome  
6 CRF - Chronic renal failure  
7 End stage renal failure on dialysis  
8 End stage renal failure with renal transplant  
9 Chronic progressive renal failure  
10 Renal disorder due to type 2 diabetes mellitus  
11 Renal disorder associated with type 1 diabetes mellitus  
12 Renal disorder associated with type II diabetes mellitus  
13 Chronic kidney disease stage 1  
14 Chronic kidney disease stage 4  
15 Chronic kidney disease stage 3  
16 Chronic kidney disease stage 3  
17 Chronic kidney disease stage 4  
18 Chronic kidney disease stage 5  
19 Chronic kidney disease stage 3A  
20 Chronic kidney disease stage 3B  
21 Chronic kidney disease stage 3 without proteinuria  
22 Chronic kidney disease stage 3A with proteinuria  
23 Chronic kidney disease stage 3A without proteinuria  
24 Chronic kidney disease stage 3B with proteinuria  
25 Chronic kidney disease stage 3B without proteinuria  
26 Chronic kidney disease stage 4 with proteinuria  
27 Chronic kidney disease stage 4 without proteinuria  
28 Chronic kidney disease stage 5 with proteinuria  
29 Chronic kidney disease stage 5 without proteinuria  
30 Other kidney/urinary diseases  
31 Chronic kidney disease stage 3  
32 Chronic kidney disease stage 5  
33 Chronic kidney disease 3 monthly review  
34 Chronic kidney disease 4 monthly review  
35 End stage kidney disease  
36 PKD - Polycystic kidney disease  
37 H/O chronic kidney disease  
38 Anaemia in chronic kidney disease  
39 Anemia in chronic kidney disease  
40 Chronic kidney disease stage 5 on dialysis  
41 Chronic kidney disease stage 5 with transplant  
42 Chronic kidney disease stage 5 due to type 2 diabetes mellitus  
43 Chronic kidney disease stage 4 due to type 2 diabetes mellitus  
44 Chronic kidney disease stage 3 due to type 2 diabetes mellitus  
45 Chronic kidney disease stage 2 due to type 2 diabetes mellitus  
46 Chronic kidney disease stage 1 due to type 2 diabetes mellitus  
47 Chronic kidney disease stage 1 due to type 1 diabetes mellitus  
48 Chronic kidney disease stage 5 due to type 1 diabetes mellitus  
49 Hypertensive heart AND chronic kidney disease stage 4  
50 Hypertensive heart AND chronic kidney disease stage 3

1  
2 Chronic kidney disease stage 4 due to hypertension  
3 Chronic kidney disease stage 3 due to hypertension  
4 Hypertension in chronic kidney disease stage 3 due to type 2 diabetes mellitus  
5 Anaemia co-occurrent and due to chronic kidney disease stage 3  
6 Chronic kidney disease with glomerular filtration rate category G3a and albuminuria category A3  
7 Chronic kidney disease with glomerular filtration rate category G3b and albuminuria category A1  
8 Chronic kidney disease with glomerular filtration rate category G3b and albuminuria category A2  
9 Chronic kidney disease stage 5 due to drug induced diabetes mellitus  
10 Kidney disorder due to diabetes mellitus  
11 Acute kidney failure stage 3  
12 Disorder related to renal transplantation  
13 renal transplant  
14 allotransplantation kidney from cadaver, heart non-beating  
15 os interventions associated with transplantation of kidney  
16 renal transplant with complication, without blame  
17 renal tubulo-interstitial disorders in transplant rejection  
18 excision of rejected transplanted kidney  
19 urological complication of renal transplant  
20 vascular complication of renal transplant  
21 rupture of artery of transplanted kidney  
22 rupture of vein of transplanted kidney  
23 stenosis of vein of transplanted kidney  
24 aneurysm of vein of transplanted kidney  
25 aneurysm of artery of transplanted kidney  
26 thrombosis of artery of transplanted kidney  
27 thrombosis of vein of transplanted kidney  
28 allotransplantation of kidney from live donor  
29 cadaveric renal transplant  
30 other specified transplantation of kidney  
31 transplantation of kidney nos  
32 exploration of renal transplant  
33 renal transplant planned  
34 kidney transplant failure and rejection  
35 xenograft renal transplant  
36 renal transplant rejection  
37 accelerated rejection of renal transplant  
38 very mild acute rejection of renal transplant  
39 acute rejection of renal transplant  
40 acute rejection of renal transplant - grade i  
41 acute rejection of renal transplant - grade ii  
42 acute rejection of renal transplant - grade iii  
43 chronic rejection of renal transplant  
44 chronic transplant nephropathy  
45 chronic rejection of renal transplant - grade 1  
46 chronic rejection of renal transplant - grade ii  
47 chronic rejection of renal transplant - grade iii  
48 acute-on-chronic rejection of renal transplant  
49 transplant of kidney  
50 kidney transplantation  
51 tx - renal transplantation  
52

1 kidney transplant  
2  
3 tx - kidney transplantation  
4 interventions associated with transplantation of kidney  
5 allotransplantation of kidney from cadaver, heart-beating  
6 interventions associated with transplantation of kidney nos  
7 post-transplantation of kidney examination, recipient  
8 pre-transplantation of kidney work-up, recipient  
9 post-transplantation of kidney examination, live donor  
10 pre-transplantation of kidney work-up, live donor  
11 transplant nephrectomy  
12 allotransplantation of kidney from cadaver nec  
13 unexplained episode of renal transplant dysfunction  
14 excision of rejected transplanted kidney  
15 [x]renal tubulo-interstitial disorders/transplant rejection  
16 history of renal transplant  
17 [v]kidney transplanted  
18 autotransplantation of kidney  
19 autotransplant kidney  
20 renal autotransplantation  
21 renal autotransplantation or reimplantation of kidney  
22 live donor renal allotransplant  
23 cadaver renal allotransplant  
24 exploration of kidney transplant  
25 allotransplantation of kidney from cadaver  
26 autotransplant of kidney  
27 transplantation of kidney  
28 removal of transplanted kidney  
29 post-transplantation of kidney examination of recipient  
30 kidney transplant with complication, without blame  
31 allotransplantation of kidney with dbd (donation after brain stem death)  
32 allotransplantation of kidney with dcd (donation after cardiac death)  
33 transplantation of kidney regime  
34 renal transplant rejected  
35 transplantation of kidney from cadaver  
36 transplantation of kidney from live donor  
37 [rfc] renal transplant  
38 renal transplant rejected  
39 Anemia of renal disease  
40  
41  
42  
43  
44  
45  
46  
47  
48  
49  
50  
51  
52  
53  
54  
55  
56  
57  
58  
59  
60

1  
2  
3  
4  
5  
6  
7  
8  
9  
10  
11  
12  
13  
14  
15  
16  
17  
18  
19  
20  
21  
22  
23  
24  
25  
26  
27  
28  
29  
30  
31  
32  
33  
34  
35  
36  
37  
38  
39  
40  
41  
42  
43  
44  
45  
46  
47  
48  
49  
50  
51  
52  
53  
54  
55  
56  
57  
58  
59  
60

For peer review only

1  
2  
3  
4  
5  
6  
7  
8  
9  
10  
11  
12  
13  
14  
15  
16  
17  
18  
19  
20  
21  
22  
23  
24  
25  
26  
27  
28  
29  
30  
31  
32  
33  
34  
35  
36  
37  
38  
39  
40  
41  
42  
43  
44  
45  
46  
47  
48  
49  
50  
51  
52  
53  
54  
55  
56  
57  
58  
59  
60

For peer review only



1  
2  
3  
4  
5  
6  
7  
8  
9  
10  
11  
12  
13  
14  
15  
16  
17  
18  
19  
20  
21  
22  
23  
24  
25  
26  
27  
28  
29  
30  
31  
32  
33  
34  
35  
36  
37  
38  
39  
40  
41  
42  
43  
44  
45  
46  
47  
48  
49  
50  
51  
52  
53  
54  
55  
56  
57  
58  
59  
60

ula

For peer review only

| ICD-10 code | Term                                                                        |
|-------------|-----------------------------------------------------------------------------|
| N18.3       | Chronic kidney disease, stage 3                                             |
| N18.4       | Chronic kidney disease, stage 4                                             |
| N18.5       | Chronic kidney disease, stage 5                                             |
| N04         | Nephrotic syndrome                                                          |
| N04.0       | Nephrotic syndrome : minor glomerular abnormality                           |
| N04.1       | Nephrotic syndrome : focal and segmental glomerular lesions                 |
| N04.2       | Nephrotic syndrome : diffuse membranous glomerulonephritis                  |
| N04.3       | Nephrotic syndrome : diffuse mesangial proliferative glomerulonephritis     |
| N04.4       | Nephrotic syndrome : diffuse endocapillary proliferative glomerulonephritis |
| N04.5       | Nephrotic syndrome : diffuse mesangiocapillary glomerulonephritis           |
| N04.6       | Nephrotic syndrome : dense deposit disease                                  |
| N04.7       | Nephrotic syndrome : diffuse crescentic glomerulonephritis                  |
| N04.8       | Nephrotic syndrome : other                                                  |
| N04.9       | Nephrotic syndrome : unspecified                                            |
| Z94.0       | Kidney transplant status                                                    |

1  
2 Medcodeid  
3 451442010  
4 453265010  
5 8462251000006117  
6 7024461000006115  
7 8047801000006118  
8 7024441000006119  
9 7024451000006117  
10 8046451000006115  
11 4412421000006113  
12 396394015  
13 303466016  
14 303489012  
15 7617291000006116  
16 7617281000006119  
17 3937821000006118  
18 5992721000006114  
19 5975531000006117  
20 303452014  
21 2475562018  
22 303453016  
23 4170231000006119  
24 7731531000006110  
25 4044018  
26 21289010  
27 52980015  
28 303425016  
29 396392016  
30 451442010  
31 493707012  
32 2576980018  
33 1736361000000112  
34 123999018  
35 396393014  
36 55851000006118  
37 2598551000006118  
38 8242561000006112  
39 3713571000006114  
40 5524681000006114  
41 6941931000006112  
42 5493051000006111  
43 4353661000006114  
44 7875311000006114  
45 7518231000006111  
46 7738891000006115  
47 2754821000006111  
48 7559281000006114  
49 2847631000006117  
50 3515305014  
51 3265651000006112

For peer review only

1 3905811000006110  
2 7868601000006115  
3 7875301000006111  
4 7966981000006110  
5 8032261000006117  
6 6349661000006117  
7 7043971000006117  
8 7559271000006111  
9 7875291000006110  
10 3772081000006115  
11 2962051000006119  
12 7043981000006119  
13 6617771000006112  
14 5992721000006114  
15 3010831000006117  
16 3713561000006119  
17 476611000006116  
18 2579818016  
19 303438012  
20 303781011  
21 906081000006114  
22 353621011  
23 453265010  
24 303393017  
25 303414013  
26 11267010  
27 7743871000006114  
28 4355091000006112  
29 4353651000006112  
30 5006801000006117  
31 2598561000006116  
32 2816681000006110  
33 6947471000006110  
34 3206871000006111  
35 226161000006113  
36 303442010  
37 303439016  
38 303518014  
39 396390012  
40 396391011  
41 7743881000006112  
42 5087011000006114  
43 603321000006118  
44 2935051000006118  
45 2507081000006119  
46 6883751000006115  
47 2962031000006114  
48 3206891000006112  
49 2816671000006112  
50 5086991000006115  
51  
52  
53  
54  
55  
56  
57  
58  
59  
60

For peer review only

1  
2 4787221000006115  
3 4787261000006114  
4 550431000006116  
5 731231000006114  
6 803961000006119  
7  
8 1786709019  
9 303419015  
10 303420014  
11 303433015  
12  
13 303458013  
14 7518221000006113  
15 5152271000006110  
16 221111000000114  
17 353613017  
18 7559261000006116  
19 6941941000006119  
20 2824431000006111  
21 3206901000006111  
22 6947461000006115  
23 2526441000006114  
24 5975531000006117  
25 2753761000006112  
26 3336411000006117  
27 211821000006111  
28 477604016  
29 303435010  
30 3033421000006115  
31 8458711000006115  
32 4353641000006110  
33 4403611000006113  
34 3515307018  
35 4355101000006118  
36 2526451000006111  
37 5493041000006114  
38 1763641000006113  
39 303437019  
40 303440019  
41 7559251000006118  
42 303441015  
43 127487019  
44 303404016  
45 683211000000113  
46 303409014  
47 303410016  
48 553311000006111  
49 557081000006110  
50 3748781000006119  
51 3507191000006112  
52 4787151000006116  
53 8040621000006113  
54  
55  
56  
57  
58  
59  
60

For peer review only

1  
2 8040631000006111  
3 12066941000006110  
4 5086951000006114  
5 12066921000006115  
6 8462251000006117  
7 8467501000006117  
8 7966991000006113  
9 3122251000006114  
10 7024461000006115  
11 8047801000006118  
12 7024441000006119  
13 3312561000006112  
14 7384531000006118  
15 8112141000006113  
16 7024451000006117  
17 12066931000006117  
18 7629961000006118  
19 8462171000006115  
20 7583121000006113  
21 3959541000006116  
22 5086841000006119  
23 4407011000006114  
24 303401012  
25 303515012  
26 69895016  
27 1232261014  
28 5086671000006111  
29 12070031000006113  
30 12061231000006118  
31 3475171000006115  
32 3587281000006119  
33 2516171000006116  
34 3514567013  
35 4787131000006111  
36 3175071000006117  
37 303516013  
38 3122241000006112  
39 288169017  
40 288170016  
41 451124014  
42 286879013  
43 353580016  
44 3514568015  
45 12070041000006115  
46 12061221000006116  
47 8046451000006115  
48 3431801000006116  
49 17930015  
50 5006091000006115  
51 12064771000006114  
52  
53  
54  
55  
56  
57  
58  
59  
60

For peer review only

1  
2 7712041000006110  
3 1680591000006117  
4 5086651000006118  
5 303517016  
6 557071000006112  
7 2146521000000117  
8 7488601000006110  
9 7488591000006119  
10 2146501000000114  
11 1850901000006115  
12 303489012  
13 7300021000006118  
14 7700651000006119  
15 7703061000006115  
16 303465017  
17 396394015  
18 303464018  
19 303466016  
20 8266201000006116  
21  
22  
23  
24  
25  
26  
27  
28  
29  
30  
31  
32  
33  
34  
35  
36  
37  
38  
39  
40  
41  
42  
43  
44  
45  
46  
47  
48  
49  
50  
51  
52  
53  
54  
55  
56  
57  
58  
59  
60

For peer review only

1  
2 Term

3 Oesophageal varices in cirrhosis of the liver  
4 Oesophageal varices in alcoholic cirrhosis of the liver  
5 Hepatic coma due to chronic hepatic failure  
6 Hepatic coma due to chronic hepatitis B  
7 Hepatic coma due to chronic hepatitis B with delta agent  
8 Chronic hepatitis B with hepatic coma  
9 Chronic viral hepatitis B with hepatic coma  
10 Hepatic coma due to chronic hepatitis C  
11 Hepatocellular carcinoma, sarcomatoid  
12 Other sequelae of chronic liver disease  
13 Liver abscess and sequelae of chronic liver disease  
14 Liver abscess and chronic liver disease causing sequelae NOS  
15 Portal hypertension in classical cystic fibrosis  
16 Portal hypertension due to cystic fibrosis  
17 Cerebrohepatorenal syndrome  
18 Esophageal varices in alcoholic cirrhosis of the liver  
19 Esophageal varices in cirrhosis of the liver  
20 Biliary cirrhosis of children  
21 Malignant neoplasm of interlobular biliary canals  
22 Biliary cirrhosis NOS  
23 Obstructive biliary cirrhosis  
24 Primary biliary cirrhosis co-occurrent with systemic scleroderma  
25 Biliary cirrhosis  
26 Secondary biliary cirrhosis  
27 Primary biliary cirrhosis  
28 Capsular portal cirrhosis  
29 Juvenile portal cirrhosis  
30 Oesophageal varices in cirrhosis of the liver  
31 Hypertrophic portal cirrhosis  
32 Portal cirrhosis  
33 Cystic fibrosis related cirrhosis  
34 Congestive cirrhosis  
35 Non-alcoholic cirrhosis NOS  
36 Xanthomatous portal cirrhosis  
37 ICC - Indian childhood cirrhosis  
38 Cirrhosis associated with cystic fibrosis  
39 Congestive cirrhosis  
40 Cirrhosis secondary to cholestasis  
41 Laennec's cirrhosis  
42 Cirrhosis of liver not due to alcohol  
43 Cholangiolitic cirrhosis  
44 Cirrhosis of liver caused by methyl dopa  
45 NAIC - North American Indian childhood cirrhosis  
46 Idiopathic copper associated cirrhosis of liver  
47 Syphilitic cirrhosis  
48 HMDPC - hypermanganesemia with dystonia, polycythaemia and cirrhosis  
49 Micronodular cirrhosis  
50 Cirrhosis of liver with primary sclerosing cholangitis  
51 Blepsias cirrhosisus



1 Postnecrotic cirrhosis  
2  
3 Cardiomyopathy co-occurrent and due to cirrhosis of liver  
4 Cirrhosis of liver caused by amiodarone  
5 Cirrhosis of liver due to chronic hepatitis C  
6 Cirrhosis of liver due to hepatitis B  
7  
8 Early cirrhosis  
9 Drug-induced cirrhosis of liver  
10 HMDPC - hypermanganesemia with dystonia, polycythemia and cirrhosis  
11 Cirrhosis of liver caused by methotrexate  
12  
13 Pigment cirrhosis  
14 Ichthyoparasitism caused by *Vandellia cirrhosa*  
15 Drug-induced hepatic cirrhosis  
16 Bronze cirrhosis  
17 Esophageal varices in alcoholic cirrhosis of the liver  
18 Hanot's cirrhosis  
19 Cardiac cirrhosis  
20 Alcoholic cirrhosis of liver  
21  
22 Laennec's cirrhosis  
23 Cardituberculous cirrhosis  
24 [X]Other and unspecified cirrhosis of liver  
25 [RFC] Cirrhosis  
26  
27 Laennec's cirrhosis, non-alcoholic  
28 Oesophageal varices in alcoholic cirrhosis of the liver  
29 Cirrhosis and chronic liver disease  
30 Unilobular portal cirrhosis  
31 Indian childhood cirrhosis  
32 Decompensated cirrhosis of liver  
33 Latent cirrhosis  
34 Nutritional cirrhosis  
35 Progressive neuronal degeneration without liver cirrhosis  
36 Cirrhosis-familial with pulmonary hypertension  
37 CL - Cirrhosis of liver  
38 Alcoholic liver cirrhosis  
39 Macronodular cirrhosis  
40 Pipe-stem portal cirrhosis  
41 Portal cirrhosis unspecified  
42 Syphilitic portal cirrhosis  
43 Toxic liver disease with fibrosis and cirrhosis of liver  
44 Multilobular portal cirrhosis  
45 Cardiac portal cirrhosis  
46 Decompensated cirrhosis  
47 Hypoxia-associated cirrhosis  
48 Cryptogenic cirrhosis  
49 Posthepatic cirrhosis  
50 Glissonian cirrhosis  
51  
52 Vandellia cirrhosa  
53 Ichthyoparasitism due to *Vandellia cirrhosa*  
54 PNC - Postnecrotic cirrhosis  
55 Hepatic cirrhosis  
56  
57 Laennec cirrhosis, non-alcoholic

1 Pipestem portal cirrhosis  
2 Zooparasitic portal cirrhosis  
3 Childhood function cirrhosis  
4 Macronodular cirrhosis of liver  
5 Glycogenosis with hepatic cirrhosis  
6 Pigmentary cirrhosis of liver  
7 Diffuse nodular cirrhosis  
8 Fatty portal cirrhosis  
9 Pigmentary portal cirrhosis  
10 Portal fibrosis without cirrhosis  
11 North American Indian childhood cirrhosis  
12 Clay pipe-stem cirrhosis  
13 Cirrhosis - non-alcoholic  
14 Cirrhosis of liver  
15 Hypermanganesemia with dystonia, polycythemia, and cirrhosis  
16 PC - Portal cirrhosis  
17 Progressive neuronal degeneration with liver cirrhosis  
18 Multilobar cirrhosis  
19 Alcoholic cirrhosis  
20 Cholangitic cirrhosis  
21 Esophageal varices in cirrhosis of the liver  
22 Mixed micro AND macronodular cirrhosis  
23 Cirrhosis of lung  
24 Postnecrotic cirrhosis of liver  
25 Mixed portal cirrhosis  
26 Toxic portal cirrhosis  
27 Parasitic cirrhosis  
28 Ascites due to alcoholic cirrhosis  
29 Toxic cirrhosis  
30 Acquired portal-systemic shunt due to cirrhosis  
31 Cirrhosis of liver co-occurrent and due to primary sclerosing cholangitis  
32 Advanced cirrhosis  
33 Cholestatic cirrhosis  
34 Cirrhosis, nonalcoholic  
35 Cirrhosis of liver due to cystic fibrosis  
36 Bacterial portal cirrhosis  
37 Zooparasitic portal cirrhosis  
38 Hypermanganesemia with dystonia, polycythaemia, and cirrhosis  
39 Infectious cirrhosis  
40 Chronic hepatitis  
41 Autoimmune chronic active hepatitis  
42 Chronic hepatitis annual review  
43 Chronic hepatitis unspecified  
44 Chronic hepatitis NOS  
45 Chronic aggressive hepatitis  
46 Chronic viral hepatitis, unspecified  
47 CH - Chronic hepatitis  
48 Chronic type B viral hepatitis  
49 CAH - Chronic aggressive hepatitis  
50 Cryoglobulinaemia due to chronic hepatitis C

- 1
- 2 Cryoglobulinemia due to chronic hepatitis C
- 3 Chronic hepatitis C caused by Hepatitis C virus genotype 1
- 4 Drug-induced chronic hepatitis
- 5 Chronic hepatitis C caused by Hepatitis C virus genotype 2
- 6 Hepatic coma due to chronic hepatic failure
- 7
- 8 Hepatic ascites co-occurrent with chronic active hepatitis due to toxic liver disease
- 9 Chronic hepatitis C with stage 4 fibrosis
- 10 Chronic immune tolerant hepatitis B
- 11 Hepatic coma due to chronic hepatitis B
- 12 Hepatic coma due to chronic hepatitis B with delta agent
- 13 Chronic hepatitis B with hepatic coma
- 14 Chronic active type B viral hepatitis
- 15 Chronic hepatitis E
- 16
- 17 Chronic hepatitis C with stage 3 fibrosis
- 18 Chronic viral hepatitis B with hepatic coma
- 19
- 20 Chronic hepatitis C caused by Hepatitis C virus genotype 4
- 21 Chronic active hepatitis C
- 22 Hepatic ascites due to chronic alcoholic hepatitis
- 23 Chronic hepatitis C with stage 2 fibrosis
- 24
- 25 Chronic aggressive viral hepatitis
- 26 Chronic hepatic failure
- 27 Chronic type C viral hepatitis
- 28 Chronic active hepatitis
- 29 Toxic liver disease with chronic persistent hepatitis
- 30
- 31 Chronic persistent hepatitis
- 32 Chronic viral hepatitis B
- 33 Chronic non-A non-B hepatitis
- 34 Chronic hepatitis C caused by Hepatitis C virus genotype 1b
- 35 Chronic hepatitis C caused by hepatitis C virus genotype 5
- 36
- 37 Chronic persistent viral hepatitis
- 38 Chronic active viral hepatitis
- 39 Chronic aggressive type B viral hepatitis
- 40
- 41 Chronic viral hepatitis D
- 42 CAH - Chronic active hepatitis
- 43 CPH - Chronic persistent hepatitis
- 44 Toxic liver disease with chronic lobular hepatitis
- 45 Chronic persistent type B viral hepatitis
- 46 [X]Other chronic viral hepatitis
- 47 [X]Chronic viral hepatitis, unspecified
- 48
- 49 Chronic alcoholic hepatitis
- 50 Chronic viral hepatitis B without delta-agent
- 51 Chronic viral hepatitis B with delta-agent
- 52 Chronic infection caused by Hepatitis D virus
- 53 Chronic hepatitis C caused by Hepatitis C virus genotype 1a
- 54 Chronic hepatitis C caused by hepatitis C virus genotype 6
- 55
- 56 Hepatic coma due to chronic hepatitis C
- 57 CLH - Chronic lobular hepatitis
- 58 Chronic viral hepatitis
- 59 Chronic hepatocerebral degeneration
- 60
- Chronic hepatitis C caused by Hepatitis C virus genotype 3

1 Occult chronic type B viral hepatitis  
2 Chronic hepatitis annual review - enhanced services admin  
3 Chronic viral hepatitis B with hepatitis D  
4 Toxic liver disease with chronic active hepatitis  
5 Chronic hepatitis C  
6 Hepatitis C genotype 4  
7 Hepatitis C virus genotype 4  
8 Hepatitis C virus genotype 3  
9 Hepatitis C genotype 3  
10 Reason for influenza vaccine - chronic liver disease  
11 Liver abscess and chronic liver disease causing sequelae NOS  
12 Sequela of chronic liver disease  
13 Chronic alcoholic liver disease  
14 Acute on chronic alcoholic liver disease  
15 Chronic liver disease  
16 Other sequelae of chronic liver disease  
17 Other non-alcoholic chronic liver disease NOS  
18 Liver abscess and sequelae of chronic liver disease  
19 HCV (hepatitis C virus) RNA (ribonucleic acid) measurement by NAAT (nucleic acid amplification test)  
20  
21  
22  
23  
24  
25  
26  
27  
28  
29  
30  
31  
32  
33  
34  
35  
36  
37  
38  
39  
40  
41  
42  
43  
44  
45  
46  
47  
48  
49  
50  
51  
52  
53  
54  
55  
56  
57  
58  
59  
60

|    | ICD-10 code | Term                                                     |
|----|-------------|----------------------------------------------------------|
| 1  |             |                                                          |
| 2  |             |                                                          |
| 3  | b18         | chronic viral hepatitis                                  |
| 4  | b18.0       | chronic viral hepatitis b with delta-agent               |
| 5  | b18.1       | chronic viral hepatitis b without delta-agent            |
| 6  | b18.2       | chronic viral hepatitis c                                |
| 7  | b18.8       | other chronic viral hepatitis                            |
| 8  | b18.9       | chronic viral hepatitis, unspecified                     |
| 9  | k70.2       | alcoholic fibrosis and sclerosis of liver                |
| 10 | k70.3       | alcoholic cirrhosis of liver                             |
| 11 | k70.9       | alcoholic hepatic failure                                |
| 12 | k71.1       | toxic liver disease with hepatic necrosis                |
| 13 | k71.3       | toxic liver disease with chronic persistent hepatitis    |
| 14 | k71.4       | toxic liver disease with chronic lobular hepatitis       |
| 15 | k71.5       | toxic liver disease with chronic active hepatitis        |
| 16 | k71.7       | toxic liver disease with fibrosis and cirrhosis of liver |
| 17 | k72         | hepatic failure, not elsewhere classified                |
| 18 | k72.1       | chronic hepatic failure                                  |
| 19 | k72.9       | hepatic failure, unspecified                             |
| 20 | k73         | chronic hepatitis, not elsewhere classified              |
| 21 | k73.0       | chronic lobular hepatitis, not elsewhere classified      |
| 22 | k73.8       | other chronic hepatitis, not elsewhere classified"       |
| 23 | k73.9       | chronic hepatitis, unspecified                           |
| 24 | k74.0       | hepatic fibrosis                                         |
| 25 | k74.1       | hepatic sclerosis                                        |
| 26 | k74.2       | hepatic fibrosis with hepatic sclerosis                  |
| 27 | k74.3       | primary biliary cirrhosis                                |
| 28 | k74.4       | secondary biliary cirrhosis                              |
| 29 | k74.5       | biliary cirrhosis, unspecified                           |
| 30 | k74.6       | other and unspecified cirrhosis of liver                 |
| 31 |             |                                                          |
| 32 |             |                                                          |
| 33 |             |                                                          |
| 34 |             |                                                          |
| 35 |             |                                                          |
| 36 |             |                                                          |
| 37 |             |                                                          |
| 38 |             |                                                          |
| 39 |             |                                                          |
| 40 |             |                                                          |
| 41 |             |                                                          |
| 42 |             |                                                          |
| 43 |             |                                                          |
| 44 |             |                                                          |
| 45 |             |                                                          |
| 46 |             |                                                          |
| 47 |             |                                                          |
| 48 |             |                                                          |
| 49 |             |                                                          |
| 50 |             |                                                          |
| 51 |             |                                                          |
| 52 |             |                                                          |
| 53 |             |                                                          |
| 54 |             |                                                          |
| 55 |             |                                                          |
| 56 |             |                                                          |
| 57 |             |                                                          |
| 58 |             |                                                          |
| 59 |             |                                                          |
| 60 |             |                                                          |

1  
2 Medcodeid  
3 1009531000006118  
4 1009571000006115  
5 1009611000006113  
6 1009631000006119  
7 1009651000006114  
8 1129781000000117  
9 1158111000000115  
10 1158321000000112  
11 1550051000000113  
12 1741561000006119  
13 3003361000006114  
14 3155151000006112  
15 7282231000006119  
16 7758091000006113  
17 8337561000006119  
18 13697811000006116  
19 296574014  
20 146051000006113  
21 201751000006110  
22 423361000006118  
23 423481000006119  
24 423511000006110  
25 426521000006114  
26 426531000006112  
27 426541000006119  
28 882791000006118  
29 2740341000000113  
30 13624181000006116  
31 127638013  
32 1234038018  
33 1705901000006118  
34 3750051000006112  
35 25776014  
36 63896011  
37 600811000006111  
38 1224941015  
39 3334501000006112  
40 378491010  
41 378497014  
42 1224879014  
43 88291000006114  
44 88301000006110  
45 88311000006113  
46 88321000006117  
47 636711000006113  
48 3334491000006116  
49 4831001000006119  
50 13621171000006117  
51 108541018

For peer review only

1  
2 829441000006116  
3 296995010  
4 696681000006115  
5 696701000006117  
6 3562061000006117  
7 3562141000006117  
8 3729481000006119  
9 10374011  
10 557191000000119  
11 378499012  
12 378500015  
13 239991000006111  
14 315350012  
15 1224880012  
16 88251000006115  
17 88261000006118  
18 88271000006113  
19 2835541000006116  
20 424971000006111  
21 1798621000000119  
22 7375381000006117  
23 7520191000006112  
24 7558801000006110  
25 7791221000006119  
26 53891000006113  
27 7769521000006118  
28 378493013  
29 378494019  
30 2159902018  
31 628281000006114  
32 893481000006117  
33 1009531000006118  
34 1776611000006113  
35 1922491000006113  
36 2376321000000116  
37 2376331000000119  
38 3161041000006119  
39 3161061000006115  
40 1224878018  
41 3528203016  
42 88351000006114  
43 88361000006111  
44 88371000006116  
45 88381000006118  
46 117831000006117  
47 222121000000113  
48 3161031000006112  
49 4830941000006112  
50 68472012  
51 41398015

For peer review only

1 297177019  
2 297179016  
3 297180018  
4 297181019  
5 2674605012  
6 2692565012  
7 299241000000110  
8 300141000000119  
9 315671000000110  
10 641211000000118  
11 641301000000114  
12 695191000006119  
13 699671000000115  
14 699731000000110  
15 699791000000111  
16 699911000000117  
17 905781000006118  
18 908811000006112  
19 983261000006119  
20 983291000006110  
21 983301000006111  
22 983311000006114  
23 1148911000000120  
24 1674121000000120  
25 1674381000000110  
26 1674661000000120  
27 1674971000000120  
28 1675051000000110  
29 1679791000006110  
30 1682241000006110  
31 1747821000006120  
32 1747831000006120  
33 1747851000006110  
34 1747861000006110  
35 1757431000000110  
36 1855101000006110  
37 1858501000006110  
38 1863341000006120  
39 2262931000000120  
40 2894411000006110  
41 3865621000006110  
42 3865631000006110  
43 4769281000006110  
44 5006891000006110  
45 5006901000006110  
46 5006911000006110  
47 5006921000006120  
48 5552111000006120  
49 7045281000006110  
50 7058051000006120

For peer review only



1  
2 7092351000006110  
3 7510741000006110  
4 7567771000006120  
5 7861151000006120  
6 11300012  
7 23820010  
8 73622018  
9 148427014  
10 178739011  
11 251269010  
12 251644018  
13 264629018  
14 264630011  
15 264631010  
16 264634019  
17 264637014  
18 264638016  
19 264639012  
20 264640014  
21 264645016  
22 297266016  
23 297267013  
24 297281010  
25 297282015  
26 297283013  
27 297284019  
28 297289012  
29 297290015  
30 297295013  
31 297296014  
32 297300010  
33 297302019  
34 297303012  
35 297311019  
36 297312014  
37 297313016  
38 297314010  
39 297315011  
40 297321010  
41 297324019  
42 297325018  
43 297330019  
44 299334015  
45 299336018  
46 299337010  
47 299345017  
48 345225017  
49 345275015  
50 345311015  
51 345318014  
52  
53  
54  
55  
56  
57  
58  
59  
60

For peer review only

1  
2 345321011  
3 345323014  
4 345345010  
5 399395015  
6 399408014  
7  
8 450602015  
9 450603013  
10 453344019  
11 459233015  
12 459234014  
13  
14 472410017  
15 472411018  
16 477355017  
17 478024019  
18 495804010  
19 500033015  
20 512000013  
21 1489345013  
22 1780267013  
23 1780375016  
24 2159216019  
25 2159223018  
26 2159225013  
27 2159227017  
28 2159274014  
29 2474650018  
30 2478828012  
31 2533403014  
32 2548491016  
33 2550890017  
34 2692343011  
35 3506708010  
36 3511291019  
37 10791000006116  
38 103531000006110  
39 125721000006111  
40 137801000000112  
41 138671000000116  
42 138681000000119  
43 138691000000117  
44 138701000000117  
45 139021000000118  
46 139161000000110  
47 141981000000118  
48 141991000000116  
49 142041000000115  
50 142051000000117  
51 148591000006114  
52 154851000000115  
53 166001000000113  
54  
55  
56  
57  
58  
59  
60

For peer review only

1  
2 223811000000118  
3 230321000006117  
4 245341000006117  
5 245351000006115  
6 245361000006118  
7  
8 301541000000116  
9 307861000000113  
10 307881000000116  
11 307901000000118  
12  
13 362161000006110  
14 363451000006114  
15 379901000006113  
16 405571000006113  
17 406781000000119  
18 425631000006118  
19 647301000006112  
20 736371000006112  
21 743461000006119  
22 800721000006115  
23 851121000006117  
24 883041000006118  
25 897431000006113  
26 905881000006111  
27 916571000006117  
28 918541000006112  
29 918551000006114  
30 918561000006111  
31 918591000006115  
32 918601000006111  
33 931251000006112  
34 931711000006118  
35 1013171000006112  
36 1013181000006110  
37 1013191000006113  
38 1175991000000119  
39 1176031000000114  
40 1176071000000111  
41 1176241000000114  
42 1176301000000117  
43 1176341000000119  
44 1176381000000110  
45 1673671000006116  
46 1699591000006112  
47 1699611000006118  
48 1741271000006111  
49 1741281000006114  
50 1776671000006116  
51 1855731000006116  
52 1855741000006114  
53 1855761000006113  
54  
55  
56  
57  
58  
59  
60

For peer review only

1  
2 1856761000006115  
3 1856771000006110  
4 1856781000006113  
5 1856791000006111  
6 1932071000006116  
7 1986841000006113  
8 2014871000006119  
9 2112801000000117  
10 2297411000000115  
11 2444841000000117  
12 2466801000000118  
13 2502351000006114  
14 2502391000006115  
15 2587911000000119  
16 2589101000000111  
17 2612111000006116  
18 2612121000006112  
19 2721471000006114  
20 2811081000006110  
21 3093151000006111  
22 3093161000006113  
23 3093171000006118  
24 3210941000006113  
25 3210951000006110  
26 3323851000006114  
27 3668321000006119  
28 3668331000006116  
29 3668341000006114  
30 3719651000006117  
31 3719661000006115  
32 3759931000006112  
33 3796891000006117  
34 3796901000006118  
35 3878481000006113  
36 3878491000006111  
37 3878501000006115  
38 4052921000006118  
39 4540141000006110  
40 4755771000006114  
41 4769541000006119  
42 4769611000006117  
43 4769641000006118  
44 4948491000006116  
45 5007101000006111  
46 5007121000006118  
47 5007131000006115  
48 5007171000006117  
49 5007261000006117  
50 5007321000006116  
51 5007351000006113

For peer review only

1  
2 5007361000006110  
3 5007541000006119  
4 5007551000006117  
5 5007621000006113  
6 5007661000006119  
7  
8 5007771000006116  
9 5007781000006118  
10 5007811000006116  
11 5007871000006113  
12  
13 5007941000006110  
14 5007971000006119  
15 5008031000006115  
16 5008101000006110  
17 5008211000006119  
18 5008231000006113  
19  
20 5023531000006114  
21 5067711000006114  
22 5192381000006111  
23 5300251000006119  
24 5300261000006117  
25 5300371000006115  
26 5614161000006114  
27 6028641000006114  
28 6369851000006112  
29 6908751000006116  
30 6997451000006113  
31 7069151000006119  
32 7220531000006114  
33 7265381000006118  
34 7306821000006113  
35 7306831000006111  
36 7512471000006111  
37 7758091000006113  
38 7840671000006115  
39 7861341000006115  
40 7863641000006114  
41 7863681000006115  
42 7952761000006111  
43 7955181000006111  
44 8024691000006119  
45 8025071000006110  
46 8029441000006110  
47 8031611000006111  
48 8053261000006111  
49 8056521000006114  
50 8079791000006114  
51 8089731000006115  
52 8191681000006117  
53 8214791000006114  
54 8259581000006110  
55  
56  
57  
58  
59  
60

For peer review only

1  
2 8260981000006117  
3 8289731000006113  
4 8289831000006117  
5 8289881000006116  
6 8313881000006113  
7  
8 11639661000006111  
9 11831381000006119  
10 12076991000006114  
11 13491221000006117  
12 13493091000006112  
13 13493111000006115  
14 13493431000006116  
15 13495041000006116  
16 13499471000006116  
17 13500261000006114  
18 13503061000006114  
19 13572191000006116  
20 13572931000006117  
21 13573141000006116  
22 13622561000006113  
23 13632801000006112  
24 13637841000006111  
25 13686241000006115  
26 13686271000006111  
27 13950881000006118  
28 14055041000006118  
29 300366019  
30 449935012  
31 451371010  
32 1212072018  
33 1227591017  
34 2474330011  
35 2476091017  
36 2548554013  
37 3509817019  
38 3521990012  
39 138981000000113  
40 139081000000117  
41 139091000000115  
42 149571000006118  
43 162111000000112  
44 306621000000116  
45 371641000000112  
46 426321000006116  
47 524511000006116  
48 907581000006119  
49 907591000006116  
50 908801000006114  
51 928621000006111  
52 966981000006112

For peer review only

1  
2 968341000006116  
3 1716631000000115  
4 1757281000006116  
5 1784651000006110  
6 1863321000006113  
7 1992451000006114  
8 1994761000006112  
9 2008521000006110  
10 2008601000006116  
11 2901571000006113  
12 3142511000006112  
13 4057041000006110  
14 4193641000006111  
15 5011071000006114  
16 5011081000006112  
17 5011111000006118  
18 5011121000006114  
19 5011141000006119  
20 5011461000006111  
21 5011471000006116  
22 5011871000006119  
23 5960821000006117  
24 5960951000006117  
25 5960971000006110  
26 6348291000006115  
27 6348301000006119  
28 6349401000006115  
29 6837051000006119  
30 6846141000006118  
31 6990981000006114  
32 6990991000006112  
33 7071911000006114  
34 7703601000006113  
35 7855631000006111  
36 7861341000006115  
37 8014911000006110  
38 8026451000006117  
39 8044481000006118  
40 8196061000006110  
41 8264201000006110  
42 8265471000006116  
43 8453031000006117  
44 8453821000006113  
45 9912271000006112  
46 13718641000006112  
47 13909861000006114  
48 13909881000006116  
49 13909891000006118  
50 13909901000006119  
51 14182621000006113

For peer review only

1  
2 14194161000006118  
3 14194651000006114  
4 14194811000006114  
5 264499015  
6 411416011  
7 413750011  
8 3508956015  
9 3508962013  
10 3508965010  
11 3516948016  
12 122361000006113  
13 122401000006115  
14 884521000006115  
15 884531000006117  
16 940051000006114  
17 940061000006111  
18 940071000006116  
19 940081000006118  
20 1160471000000111  
21 1682791000006112  
22 1726581000006116  
23 2115821000000118  
24 2118011000000114  
25 2126181000000114  
26 2127781000000110  
27 2539131000006116  
28 5010981000006119  
29 5011451000006114  
30 5866391000006119  
31 5866401000006117  
32 7568281000006111  
33 7597121000006117  
34 7618821000006118  
35 8195431000006118  
36 8274811000006116  
37 300312010  
38 300313017  
39 300321011  
40 300322016  
41 300411016  
42 300941014  
43 395780010  
44 451133011  
45 451134017  
46 267321000006114  
47 370701000006118  
48 542251000006112  
49 542261000006114  
50 543141000006110  
51 841051000006113

For peer review only



1  
2 1573101000006112  
3 1576261000006112  
4 1900601000006111  
5 1900651000006110  
6 2436731000000112  
7  
8 2729551000000111  
9 2729571000000119  
10 5011041000006118  
11 5011051000006116  
12 5011061000006119  
13 5011091000006110  
14 5011101000006116  
15 5011131000006112  
16 5011291000006119  
17 5011331000006114  
18 5011351000006119  
19 5582311000006110  
20 7598981000006119  
21 7599001000006116  
22 7839991000006115  
23 8011371000006117  
24 296995010  
25 405339016  
26 1227592012  
27 3508952018  
28 3508955016  
29 3508958019  
30 3508961018  
31 3508964014  
32 3509777019  
33 3509790014  
34 3509794017  
35 3509799010  
36 3509810017  
37 3636133016  
38 605461000006117  
39 605481000006110  
40 605491000006113  
41 809421000006116  
42 1716621000000117  
43 1773371000006117  
44 4778181000006119  
45 4778201000006118  
46 5649201000006113  
47 7519441000006112  
48 13717171000006112  
49 13718601000006110  
50 13718621000006117  
51 14014251000006116  
52 14194191000006114

For peer review only

1  
2 14194211000006110  
3 14194281000006115  
4 14194331000006112  
5 14194491000006118  
6 14194571000006115  
7 14194611000006113  
8 14194641000006112  
9 14194661000006111  
10 14194741000006118  
11 14194801000006111  
12 14194841000006113  
13 14194941000006115  
14 14194971000006111  
15  
16 300370010  
17 300371014  
18 411518010  
19 1780304018  
20 605501000006117  
21 909171000006115  
22 21256010  
23 26545010  
24 251625013  
25 294635013  
26 294637017  
27 294638010  
28 294641018  
29 294642013  
30 294643015  
31 294644014  
32 294645010  
33 294646011  
34 294647019  
35 294648012  
36 294652012  
37 294653019  
38 294654013  
39 294655014  
40 294656010  
41 294688019  
42 294718018  
43 295668011  
44 295671015  
45 295672010  
46 295680015  
47 295681016  
48 295684012  
49 295685013  
50 295686014  
51 295687017  
52 295688010

For peer review only

1  
2 295690011  
3 295713019  
4 295714013  
5 346929012  
6 401760017  
7 497559016  
8 3635492010  
9 3636474012  
10  
11 148381000006115  
12 294111000000119  
13 294321000000111  
14 359081000006118  
15 359101000006114  
16 359141000006111  
17 359151000006113  
18 359241000006119  
19 362941000006113  
20 363021000006113  
21 363791000006112  
22 376531000006119  
23 376541000006112  
24 376571000006116  
25 376631000006115  
26 398571000006112  
27 399031000006111  
28 406841000000115  
29 407461000000119  
30 408361000000111  
31 408401000000119  
32 408421000000111  
33 408461000000115  
34 408481000000112  
35 408501000000115  
36 423221000006117  
37 423351000006115  
38 423381000006111  
39 423391000006114  
40 425901000006116  
41 428201000006119  
42 431681000006117  
43 431691000006119  
44 696161000006115  
45 882171000006115  
46 882181000006117  
47 882191000006119  
48 882201000006116  
49 882211000006118  
50 914921000006117  
51 914931000006119  
52 914941000006112

For peer review only

1  
2 914951000006114  
3 915111000006112  
4 915121000006116  
5 939491000006118  
6 999961000006114  
7  
8 1823871000006112  
9 1834091000006117  
10 1856601000006111  
11 1856611000006114  
12 1856631000006115  
13 1916981000006111  
14 1932091000006115  
15 1933001000006115  
16 1949611000006114  
17 1949621000006118  
18 1949631000006115  
19 1949641000006113  
20 1949651000006110  
21 1949661000006112  
22 1949671000006117  
23 1949681000006119  
24 1949691000006116  
25 1949701000006116  
26 1949711000006118  
27 1949721000006114  
28 1949761000006115  
29 1949771000006110  
30 1950501000006117  
31 1950571000006111  
32 1950641000006119  
33 1950651000006117  
34 1950731000006115  
35 1950781000006119  
36 1969651000006118  
37 1971401000006111  
38 1971541000006114  
39 1971661000006114  
40 1971701000006118  
41 1971771000006112  
42 1972021000006119  
43 1972041000006114  
44 1972061000006113  
45 1972071000006118  
46 1972081000006115  
47 1972131000006115  
48 1972141000006113  
49 1972171000006117  
50 1972181000006119  
51 1972191000006116  
52 1972201000006118

For peer review only

1  
2 1972211000006115  
3 1972231000006114  
4 1972251000006119  
5 1972291000006113  
6 1972311000006112  
7  
8 1972341000006111  
9 1972371000006115  
10 1972401000006117  
11 1972431000006113  
12 1972451000006118  
13 1972471000006111  
14 1972481000006114  
15 1972501000006116  
16 1972571000006110  
17 1972661000006119  
18 1972681000006112  
19 1972711000006113  
20 1972731000006119  
21 1972751000006114  
22 1972791000006115  
23 1972821000006112  
24 1972831000006110  
25 1972871000006113  
26 1972911000006111  
27 1972931000006117  
28 1973171000006112  
29 1973221000006118  
30 1973271000006117  
31 1973341000006118  
32 1973381000006112  
33 1973401000006112  
34 1973461000006113  
35 1973531000006117  
36 1973711000006116  
37 1973941000006119  
38 1974271000006119  
39 1974931000006114  
40 1975591000006119  
41 1976091000006118  
42 1976831000006111  
43 2127581000000115  
44 2221421000000114  
45 2248021000000110  
46 2284371000000110  
47 2290431000000110  
48 2345801000000113  
49 2345881000000115  
50 2345931000000111  
51 2403101000000116  
52 2439591000000113

For peer review only

1  
2 2439631000000113  
3 2439671000000110  
4 2439711000000111  
5 2445471000000112  
6 2445691000000113  
7 2451471000000113  
8 2502971000006115  
9 2575731000006115  
10 2603271000006110  
11 2620431000000115  
12 2620471000000118  
13 2649061000006115  
14 2664611000006117  
15 2729791000000114  
16 2742971000000119  
17 2742991000000115  
18 2743011000000119  
19 2912321000006113  
20 2929931000006112  
21 2931251000006113  
22 3414231000006117  
23 3414251000006112  
24 3511181000006115  
25 3575041000006117  
26 3653671000006113  
27 3802651000006111  
28 3964661000006114  
29 4539871000006116  
30 5005421000006117  
31 5005601000006112  
32 5005871000006119  
33 5005881000006116  
34 5618261000006114  
35 5618271000006119  
36 6024061000006111  
37 6024071000006116  
38 6348031000006112  
39 6348061000006115  
40 6452391000006116  
41 6897211000006117  
42 6897241000006118  
43 6897251000006116  
44 6897271000006114  
45 6900181000006114  
46 6900201000006110  
47 6900221000006117  
48 6900241000006112  
49 6973421000006116  
50 6973461000006110  
51 7043651000006119

For peer review only

1  
2 7043661000006117  
3 7263021000006116  
4 7510731000006118  
5 7510741000006111  
6 7511421000006118  
7  
8 7560531000006110  
9 7710381000006117  
10 7755121000006115  
11 7840631000006118  
12  
13 7843521000006113  
14 7863681000006115  
15 7874771000006117  
16 7955111000006116  
17 7955161000006118  
18 7969281000006110  
19 7969371000006115  
20 8009521000006114  
21 8009531000006112  
22 8010111000006117  
23 8014401000006116  
24 8024201000006111  
25 8024641000006111  
26 8024691000006119  
27 8028391000006119  
28 8031751000006119  
29 8031761000006117  
30 8031771000006112  
31 8042791000006116  
32 8042801000006115  
33 8089231000006110  
34 8089241000006117  
35 8214731000006110  
36 11930781000006119  
37 12106351000006118  
38 12106371000006111  
39 12106381000006114  
40 12106391000006112  
41 12116721000006112  
42 12370641000006110  
43 12370651000006112  
44 12370661000006114  
45 12626321000006119  
46 12734321000006118  
47 13934381000006118  
48  
49 76484016  
50 294660013  
51 317932013  
52 401757012  
53 401759010  
54 402397010

For peer review only

1 402429016  
2 411950013  
3 1222549013  
4 292111000006117  
5 359091000006115  
6 359161000006110  
7 882941000006113  
8 45046017  
9 299325013  
10 499946014  
11 500317011  
12 363031000006111  
13 363041000006118  
14 905791000006115  
15 1576281000006119  
16 1909771000006119  
17 2931231000006118  
18 2931241000006111  
19 3802621000006119  
20 5005501000006111  
21 5005521000006118  
22 5005541000006113  
23 5005561000006112  
24 5005581000006119  
25 5005691000006117  
26 5005711000006119  
27 7834071000006116  
28 8030791000006119  
29 8032911000006111  
30 8032931000006117  
31 8044911000006116  
32 8044941000006117  
33 8044981000006111  
34 145513018  
35 297130012  
36 345068012  
37 486695013  
38 905801000006119  
39 908821000006116  
40 3101701000006120  
41 3101721000006110  
42 3875981000006110  
43 52463013  
44 93019012  
45 133866014  
46 143230018  
47 301719013  
48 311616019  
49 311696015  
50 311702015

For peer review only



1  
2 312580013  
3 312591018  
4 359459016  
5 1776211019  
6 1784692011  
7  
8 376791000006111  
9 614691000006113  
10 3676291000006116  
11 5128181000006118  
12 5128191000006115  
13 5141001000006116  
14 5141031000006112  
15 7284941000006112  
16 7559371000006119  
17 13991601000006111  
18 33622011  
19 64875013  
20 81717011  
21 295688010  
22 297037012  
23 297043014  
24 299312017  
25 299313010  
26 299314016  
27 299321016  
28 299323018  
29 345121017  
30 2841061014  
31 151951000006115  
32 151961000006118  
33 244311000006117  
34 630491000006110  
35 636681000000117  
36 882961000006112  
37 905821000006112  
38 909021000006117  
39 1148731000000112  
40 1776901000006117  
41 1925611000006114  
42 2269041000000116  
43 3028151000006111  
44 3293631000006118  
45 3293641000006111  
46 3293651000006113  
47 3293661000006110  
48 3511181000006115  
49 7043651000006119  
50 7043661000006117  
51 7289421000006111  
52 7560531000006110

For peer review only

1  
2 7730811000006111  
3 7730821000006115  
4 7790241000006117  
5 7803921000006111  
6 7831581000006114  
7 7838691000006117  
8 8031751000006119  
9 8031761000006117  
10 8031771000006112  
11 13625531000006110  
12 52052015  
13 251539016  
14 264417019  
15 286639018  
16 286641017  
17 286642012  
18 286643019  
19 286644013  
20 286645014  
21 288115019  
22 288116018  
23 296841018  
24 296884017  
25 311933012  
26 311934018  
27 311935017  
28 311936016  
29 311937013  
30 311938015  
31 311939011  
32 311940013  
33 311941012  
34 311942017  
35 311943010  
36 311944016  
37 348287011  
38 499948010  
39 1221108018  
40 1777666018  
41 221361000006118  
42 301341000006119  
43 426301000006114  
44 640991000006117  
45 3001451000006118  
46 4177151000006119  
47 4177161000006117  
48 6597811000006119  
49 6597831000006113  
50 124598014  
51 206411014

For peer review only

- 1
- 2 297233015
- 3 297234014
- 4 297238012
- 5 297239016
- 6 299393011
- 7 299394017
- 8 345771011
- 9 345773014
- 10 345780011
- 11 411453017
- 12 411454011
- 13 451123015
- 14 2475877015
- 15 3509879014
- 16 497021000006113
- 17 543071000006115
- 18 761411000006111
- 19 907241000006111
- 20 907411000006113
- 21 1815931000006114
- 22 1815951000006119
- 23 1815971000006112
- 24 1815981000006110
- 25 2122001000000116
- 26 2283041000000116
- 27 2283831000000117
- 28 2326271000000114
- 29 3200341000006112
- 30 3288331000006116
- 31 3445431000006112
- 32 3445451000006117
- 33 4769391000006119
- 34 5012421000006114
- 35 5614181000006116
- 36 7557921000006113
- 37 7557961000006119
- 38 7557971000006114
- 39 12465281000006112
- 40
- 41
- 42
- 43
- 44
- 45
- 46
- 47
- 48
- 49
- 50
- 51
- 52
- 53
- 54
- 55
- 56
- 57
- 58
- 59
- 60

For peer review only

## 1 Term

2  
3 Cause of learning disabilities: Down's syndrome  
4 Cause of learning disabilities: Fragile X syndrome  
5 Cause of learning disabilities: Microcephaly  
6 Cause of learning disabilities: Prader-Willi syndrome  
7 Cause of learning disabilities: Rett syndrome  
8 Severe learning disability  
9 Preferred place of care - learning disability unit  
10 Preferred place of death: learning disability unit  
11 Profound learning disability  
12 Excepted from learning disability quality indicators - patient unsuitable  
13 Profound learning disability  
14 Severe learning disability  
15 Nonverbal learning disorder  
16 X-linked epilepsy with learning disability and behaviour disorder syndrome  
17 Significant learning disability  
18 Significant learning disability  
19 [X]Severe mental retardation, other impairments of behaviour  
20 Severe mental retardation, IQ in range 20-34  
21 Profound mental retardation with IQ less than 20  
22 [X]Prfnd mental retardation without mention impairment behav  
23 [X]Profound ment retard sig impairmnt behav req attent/treat  
24 [X]Profound mental retardation, other impairments of behavr  
25 [X]Sev mental retard sig impairment behav req attent/treatmt  
26 [X]Sev mental retard with statement no or min impairm behav  
27 [X]Sev mental retardation without mention impairment behav  
28 Severe mental retardation  
29 Severe mental retardation without significant impairment of behaviour  
30 Infantile spasms, psychomotor retardation, progressive brain atrophy, basal ganglia disease syndrome  
31 Angelman syndrome  
32 Angelman's syndrome  
33 Angelman syndrome  
34 Angelman syndrome  
35 Coffin-Lowry syndrome  
36 Cornelia de Lange syndrome  
37 Cri du chat syndrome  
38 Dubowitz syndrome  
39 Edwards syndrome  
40 Pseudotrisonomy 18  
41 Partial trisomy 18 in Edward's syndrome  
42 Trisomy 18 NOS  
43 Trisomy 18, meiotic nondisjunction  
44 Trisomy 18, mitotic nondisjunction  
45 Trisomy 18 - mitotic nondisjunction mosaicism  
46 Trisomy 18, translocation  
47 Edward's syndrome - trisomy 18  
48 Complete trisomy 18 syndrome  
49 Trisomy 18 - meiotic nondisjunction  
50 Distal trisomy 18q  
51 Hurler's syndrome

1 Hurler's syndrome  
2 Cerebral degeneration in mucopolysaccharidoses  
3 Mucopolysaccharidosis, type 1  
4 Mucopolysaccharidosis type III  
5 Mucopolysaccharidosis, MPS-I-H  
6 Mucopolysaccharidosis type I-H  
7 Mucopolysaccharidosis, MPS-I  
8 Laurence-Moon-Biedl syndrome  
9 Mowat-Wilson syndrome  
10 Patau's syndrome NOS  
11 Partial trisomy 13 in Patau's syndrome  
12 Patau syndrome  
13 Trisomy 13, meiotic nondisjunction  
14 Trisomy 13 NOS  
15 Trisomy 13, mitotic nondisjunction  
16 Trisomy 13 - mitotic nondisjunction mosaicism  
17 Trisomy 13, translocation  
18 Complete trisomy 13 syndrome  
19 Rett syndrome  
20 Chromosome 4q deletion syndrome  
21 Chromosome 3p deletion syndrome  
22 Chromosome 1p36 deletion syndrome  
23 Chromosome 2q37 deletion syndrome  
24 Chromosome Xp11.3 microdeletion syndrome  
25 Wolff - Hirschorn syndrome  
26 Wolf Hirschhorn syndrome  
27 Down's syndrome NOS  
28 Partial trisomy 21 in Down's syndrome  
29 Suspected Downs syndrome  
30 Down's syndrome  
31 Down's syndrome  
32 Cause of learning disabilities: Down's syndrome  
33 Reason for referral: Downs Syndrome  
34 Down syndrome body mass index centile  
35 Down's syndrome height centile  
36 Down's syndrome weight centile  
37 Down syndrome  
38 Downs syndrome  
39 Trisomy 21 NOS  
40 Trisomy 21  
41 Trisomy 21, meiotic nondisjunction  
42 Trisomy 21, mitotic nondisjunction  
43 Trisomy 21- mitotic nondisjunction mosaicism  
44 Trisomy 21, translocation  
45 Suspect trisomy 21 foetus  
46 Trisomy 21  
47 Complete trisomy 21 syndrome  
48 Trisomy 21- meiotic nondisjunction  
49 Mongolism  
50 Multiple sclerosis

1 Multiple sclerosis of the spinal cord  
2 Generalised multiple sclerosis  
3 Exacerbation of multiple sclerosis  
4 Multiple sclerosis NOS  
5 Secondary progressive multiple sclerosis  
6 Primary progressive multiple sclerosis  
7 Multiple sclerosis review  
8 Multiple sclerosis care plan agreed  
9 Multiple sclerosis multidisciplinary review  
10 Benign multiple sclerosis  
11 Malignant multiple sclerosis  
12 Multiple sclerosis of the brain stem  
13 Management of multiple sclerosis in onset phase  
14 Management of multiple sclerosis in early disease phase  
15 Management of multiple sclerosis in stable disability phase  
16 Management of multiple sclerosis in palliative phase  
17 [RFC] Multiple sclerosis  
18 [RFC] Multiple sclerosis  
19 Multiple sclerosis - personal health plan  
20 Multiple sclerosis - primary progressive  
21 Multiple sclerosis - secondary progressive  
22 Multiple sclerosis - relapsing remitting  
23 Multiple sclerosis review declined  
24 Multiple sclerosis monitoring administration  
25 Multiple sclerosis monitoring first letter  
26 Multiple sclerosis monitoring second letter  
27 Multiple sclerosis monitoring telephone invitation  
28 Multiple sclerosis monitoring third letter  
29 Management of multiple sclerosis in progressive disability phase  
30 Relapsing remitting multiple sclerosis  
31 Multiple sclerosis monitoring administration  
32 Multiple sclerosis monitoring first letter  
33 Multiple sclerosis monitoring third letter  
34 Multiple sclerosis monitoring telephone invite  
35 Referral to community multiple sclerosis team  
36 Multiple sclerosis questionnaire completed  
37 Suspected multiple sclerosis  
38 Referral by Multiple Sclerosis nurse specialist  
39 Suspected multiple sclerosis  
40 MS - Multiple sclerosis  
41 Acute disseminated encephalomyelitis  
42 ADEM - Acute disseminated encephalomyelitis  
43 Multiple sclerosis of the brainstem  
44 Acute relapsing multiple sclerosis  
45 Chronic progressive multiple sclerosis  
46 Multiple sclerosis (MS) chronic/progressive  
47 Remittent-progressive multiple sclerosis  
48 Kurtzke multiple sclerosis rating scale  
49 Multiple sclerosis (MS) secondary progressive  
50 Multiple sclerosis (MS) relapsing remitting

1  
2 Multiple sclerosis (MS) primary progressive  
3 Dementia associated with multiple sclerosis  
4 Multiple sclerosis clinic  
5 Progressive relapsing multiple sclerosis  
6 Juvenile myoclonic epilepsy  
7 Status epilepticus  
8 Benign Rolandic epilepsy  
9 Gelastic epilepsy  
10 Epilepsy  
11 Witnessed epileptic seizure  
12 H/O: epilepsy  
13 Epilepsy monitoring  
14 Initial epilepsy assessment  
15 Follow-up epilepsy assessment  
16 Epilepsy associated problems  
17 Epilepsy drug side effect  
18 Epilepsy treatment changed  
19 Epilepsy treatment started  
20 Epilepsy treatment stopped  
21 Epilepsy monitoring NOS  
22 Epileptic seizures - atonic  
23 Epileptic seizures - akinetic  
24 Neonatal myoclonic epilepsy  
25 Epileptic seizures - clonic  
26 Epileptic seizures - myoclonic  
27 Epileptic seizures - tonic  
28 Other specified generalised convulsive epilepsy  
29 Generalised convulsive epilepsy NOS  
30 Partial epilepsy with impairment of consciousness  
31 Temporal lobe epilepsy  
32 Psychosensory epilepsy  
33 Epileptic automatism  
34 Partial epilepsy with impairment of consciousness NOS  
35 Somatosensory epilepsy  
36 Partial epilepsy with autonomic symptoms  
37 Visceral reflex epilepsy  
38 Visual reflex epilepsy  
39 Unilateral epilepsy  
40 Kojevnikov's epilepsy  
41 Other forms of epilepsy  
42 Cursive (running) epilepsy  
43 Other forms of epilepsy NOS  
44 [X]Other generalized epilepsy and epileptic syndromes  
45 [X]Other epilepsy  
46 [X]Other status epilepticus  
47 [X]Status epilepticus, unspecified  
48 Focal epilepsy  
49 Juvenile absence epilepsy  
50 Severe myoclonic epilepsy in infancy  
51 Drug-induced epilepsy

1 Menstrual epilepsy  
2 Nocturnal epilepsy  
3 Complex partial status epilepticus  
4 Progressive myoclonic epilepsy  
5 Epilepsy NOS  
6 Motor epilepsy  
7 Jacksonian, focal or motor epilepsy  
8 Epileptic seizure  
9 Epilepsy control good  
10 Epilepsy control poor  
11 Tonic-clonic epilepsy  
12 Grand mal epilepsy  
13 Psychomotor epilepsy  
14 Alcohol-induced epilepsy  
15 Pykno-epilepsy  
16 Generalised convulsive epilepsy  
17 Photosensitive epilepsy  
18 Transient epileptic amnesia  
19 Epilepsy medication review  
20 Epilepsy care arrangement  
21 Epilepsy severity  
22 Emergency epilepsy treatment since last appointment  
23 Suspected epilepsy  
24 Epilepsy confirmed  
25 Complex partial epileptic seizure  
26 Stress-induced epilepsy  
27 Traumatic epilepsy  
28 No epilepsy drug side effects  
29 Epilepsy monitoring verbal invite  
30 Generalised non-convulsive epilepsy  
31 Seen in epilepsy clinic  
32 Pyridoxine-dependent epilepsy  
33 Recurrent complex partial epilepsy  
34 Other specified generalised nonconvulsive epilepsy  
35 Tonic-clonic epilepsy  
36 Status epilepticus, unspecified  
37 Epilepsy limits activities  
38 Epilepsy screening administration  
39 Epilepsy screening first invitation  
40 Epilepsy screening second invitation  
41 Epilepsy screening third invitation  
42 Exception reporting - epilepsy quality indicators  
43 Excepted from epilepsy quality indicators - informed dissent  
44 Epilepsy restricts employment  
45 Epilepsy prevents employment  
46 Epilepsy does not limit activities  
47 Epilepsy management plan given  
48 Sensory induced epilepsy  
49 Epilepsy impairs education  
50 Did not attend epilepsy clinic



1  
2 Generalised epilepsy  
3 Petit mal (minor) epilepsy  
4 Localisation-related epilepsy  
5 Partial epilepsy  
6 Partial epilepsy without impairment of consciousness OS  
7 Simple partial epileptic seizure  
8 Epilepsy monitoring call first letter  
9 Epilepsy monitoring call second letter  
10 Epilepsy monitoring call third letter  
11 Acquired epileptic aphasia  
12 [X]Antiepilept + antiparksn drug caus advers eff therap use  
13 [X]Epileptic psychosis NOS  
14 Antiepileptic adverse reaction  
15 Epilepsy monitoring telephone invite  
16 [X]Schizophrenia-like psychosis in epilepsy  
17 Epileptic absences  
18 Localization-related(focal)(partial)idiopathic epilepsy and epileptic syndromes with seizures of localised onset  
19 Limbic system epilepsy  
20 Generalised nonconvulsive epilepsy NOS  
21 Partial epilepsy  
22 Petit mal epilepsy  
23 Post traumatic epilepsy  
24 [RFC] Epilepsy/convulsion  
25 Epilepsy monitoring  
26 Initial epilepsy assessment  
27 Follow-up epilepsy assessment  
28 Epilepsy associated problems  
29 Epilepsy drug side effects  
30 Nocturnal epilepsy  
31 Excepted from epilepsy quality indicators - patient unsuitable  
32 Early infantile epileptic encephalopathy with suppression bursts  
33 Adverse reaction to Antiepileptics  
34 Adverse reaction to Drugs Used In Control Of Epilepsy  
35 Adverse reaction to Drugs Used In Status Epilepticus  
36 Contraceptive advice for patients with epilepsy  
37 Pre-conception advice for patients with epilepsy  
38 Pregnancy advice for patients with epilepsy  
39 Pregnancy advice for patients with epilepsy not indicated  
40 Contraceptive advice for patients with epilepsy declined  
41 Pre-conception advice for patients with epilepsy declined  
42 Pregnancy advice for patients with epilepsy declined  
43 Epilepsy treatment continued  
44 Epilepsy monitoring call first letter  
45 Epilepsy monitoring call third letter  
46 Contraceptive advice for patients with epilepsy not indicated  
47 Pre-conception advice for patients with epilepsy not indicated  
48 Reason for referral: Epilepsy  
49 Epilepsy monitoring administration  
50 Epilepsy monitoring in primary care  
51 Epilepsy monitoring in secondary care

1  
2 Epilepsy treatment compliance  
3 Epilepsy treatment compliance good  
4 Epilepsy treatment compliance poor  
5 Epilepsy monitoring default  
6 3D study - problems with epilepsy management  
7 Provision of information about SUDEP (sudden unexpected death in epilepsy)  
8 Contraceptive advice for patients on valproate for epilepsy  
9 Referral to epilepsy clinic  
10 Referral to epilepsy service  
11 Paediatric epilepsy care plan  
12 At risk of sudden unexpected death in epilepsy  
13 Epilepsia partialis continua  
14 Focal status epilepticus  
15 Neurological Disorders Depression Inventory in Epilepsy  
16 SUDEP - sudden unexpected death in epilepsy  
17 Epileptic absence status  
18 Non-convulsive status epilepticus with impaired consciousness  
19 Convulsive status epilepticus  
20 Generalized epilepsy  
21 Idiopathic generalised epilepsy  
22 Idiopathic generalized epilepsy  
23 Primary generalised epilepsy  
24 Temporal-central focal epilepsy  
25 Centrotemporal epilepsy  
26 Childhood absence epilepsy  
27 Symptomatic generalised epilepsy  
28 Symptomatic generalized epilepsy  
29 Secondary generalized epilepsy  
30 Post-traumatic epilepsy  
31 PTE - Post-traumatic epilepsy  
32 Unclassified epileptic seizures  
33 Reflex epilepsy  
34 Sensory-induced epilepsy  
35 Epileptic disorder  
36 Epileptic  
37 EP - Epilepsy  
38 Photogenic epilepsy  
39 History of epilepsy  
40 Epileptic drop attack  
41 Benign myoclonic epilepsy in infancy  
42 TLE - Temporal lobe epilepsy  
43 Mesiobasal limbic epilepsy  
44 At risk of epileptic fits  
45 Benign frontal epilepsy of childhood  
46 Benign atypical partial epilepsy in childhood  
47 Epilepsy with recurrent unilateral seizures in children  
48 Benign occipital epilepsy of childhood - early onset variant  
49 Frontal lobe epilepsy  
50 Opercular epilepsy  
51 Parietal lobe epilepsy

1  
2 Occipital lobe epilepsy  
3 Epilepsy with grand mal seizures on awakening  
4 Cryptogenic generalised epilepsy  
5 Myoclonic astatic epilepsy  
6 Myoclonic absence epilepsy  
7 Cryptogenic myoclonic epilepsy  
8 Idiopathic myoclonic epilepsy  
9 Symptomatic myoclonic epilepsy  
10 Epilepsy undetermined whether focal or generalised  
11 Epilepsy with continuous spike wave during slow-wave sleep  
12 Secondary reading epilepsy  
13 Sleep-related epilepsy  
14 Eating epilepsy  
15 Non-convulsive status epilepticus without three per second spike wave  
16 Non-convulsive simple partial status epilepticus  
17 Epileptic psychosis  
18 Triple X syndrome, epilepsy, and hypogammaglobulinaemia  
19 Epilepsy monitoring status  
20 Generalised epileptiform discharges  
21 Generalized epileptiform discharges  
22 Bilateral periodic epileptiform discharges  
23 Localisation-related idiopathic epilepsy  
24 Epileptic fit  
25 Carbamazepine antiepileptic  
26 Epilepsy monitoring call  
27 Refractory epilepsia partialis continua  
28 Non-epileptic myoclonus  
29 Epilepsy assessment  
30 Nonconvulsive status epilepticus  
31 Refractory epilepsy  
32 Intractable epilepsy  
33 Refractory juvenile myoclonic epilepsy  
34 X-linked epilepsy with learning disability and behaviour disorder syndrome  
35 Epileptic encephalopathy  
36 Epilepsy due to stroke  
37 Epilepsy with mesial temporal sclerosis  
38 Epilepsy co-occurrent and due to dementia  
39 Epilepsy telangiectasia syndrome  
40 Epilepsy of infancy with migrating focal seizures  
41 Epileptic dementia with behavioural disturbance  
42 Intractable partial temporal lobe epilepsy with impairment of consciousness  
43 DNA (did not attend) epilepsy clinic  
44 Epilepsy in pregnancy  
45 Atypical absence epilepsy  
46 Epilepsy care education  
47 Epilepsy monitoring telephone invitation  
48 Infantile spasms with status epilepticus  
49 Petit-mal epilepsy  
50 Epilepsy screening invitation  
51 Referral for epilepsy review  
52

1 Under care of epilepsy specialist nurse  
2 Epilepsy annual review  
3 Epilepsy care management  
4 Epilepsy self-management plan review  
5 Paediatric epilepsy service  
6 Referral to epilepsy specialist nurse declined  
7 Infantile-onset symptomatic epilepsy syndrome  
8 STXBP1 encephalopathy with epilepsy  
9 Benign familial mesial temporal lobe epilepsy  
10 Benign occipital lobe epilepsy  
11 Benign partial epilepsy of infancy with complex partial seizures  
12 Mesial temporal lobe epilepsy with hippocampal sclerosis  
13 New-onset refractory status epilepticus  
14 Cortical dysplasia with focal epilepsy syndrome  
15 Infantile epileptic dyskinetic encephalopathy  
16 Early-onset spastic ataxia, myoclonic epilepsy, neuropathy syndrome  
17 KCNQ2-related epileptic encephalopathy  
18 Myoclonic epilepsy in non-progressive encephalopathy  
19 Cryptogenic late-onset epileptic spasms  
20 Congenital muscular dystrophy with intellectual disability and severe epilepsy  
21 Familial temporal lobe epilepsy  
22 Familial mesial temporal lobe epilepsy with febrile seizures  
23 Benign childhood epilepsy with centrotemporal spikes, refractory  
24 Benign childhood epilepsy with centrotemporal spikes, non-refractory  
25 Epilepsy due to infectious encephalitis  
26 Scar epilepsy  
27 Cerebellar stroke syndrome  
28 Admission to stroke unit  
29 H/O: Stroke in last year  
30 Occlusive stroke  
31 [V]Personal history of stroke  
32 Referral to stroke clinic  
33 H/O: stroke  
34 Haemorrhagic stroke monitoring  
35 Left hemispheric cerebellar artery embolism with stroke  
36 PASS (Postural Assessment Scale for Stroke Patients) score  
37 Exception reporting - stroke quality indicators  
38 Excepted from stroke quality indicators - patient unsuitable  
39 Excepted from stroke quality indicators - informed dissent  
40 Sequelae of stroke, not spec'd as h'morrhage or infarction  
41 Did not attend stroke clinic  
42 Seen in stroke clinic  
43 Delivery of rehabilitation for stroke  
44 [X]Sequelae of stroke, not spec'd as h'morrhage or infarction  
45 Brainstem stroke syndrome  
46 [RFC] Stroke/CVA  
47 [RFC] Stroke  
48 [RFC] Stroke  
49 MELAS - Mitochondrial encephalopathy, lactic acidosis and stroke-like episodes  
50 Referral to multidisciplinary stroke function improvement service

1 Annual Stroke/CVA blood test  
2 Suspected stroke  
3 Suspected stroke  
4 Referral for multidisciplinary stroke function improvement declined  
5 Referral by stroke nurse specialist  
6 VTE risk assessment - acute stroke  
7 Referral to stroke rehabilitation service  
8 Referral to community stroke service  
9 Discharge from community stroke service  
10 Completed stroke  
11 Juvenile myopathy, encephalopathy, lactic acidosis AND stroke  
12 Brain stem stroke  
13 Nonparalytic stroke  
14 Total anterior cerebral circulation stroke  
15 TACS - Total anterior cerebral circulation stroke  
16 Partial anterior cerebral circulation stroke  
17 PACS - Partial anterior cerebral circulation stroke  
18 Posterior cerebral circulation stroke  
19 Anterior circulation stroke of uncertain pathology  
20 Posterior circulation stroke of uncertain pathology  
21 Spinal cord stroke  
22 Referral to stroke service  
23 Discharge from stroke service  
24 Seen by stroke service  
25 Thrombotic stroke  
26 Embolic stroke  
27 Neonatal stroke  
28 Basal ganglion stroke  
29 Cardioembolic stroke  
30 Ischaemic stroke  
31 Ischemic stroke  
32 Thalamic stroke  
33 Post stroke pain  
34 Cerebral ischaemic stroke due to small artery occlusion  
35 Epilepsy due to stroke  
36 Sequela of cardioembolic stroke  
37 DNA (did not attend) stroke clinic  
38 Ischaemic stroke without coma  
39 Did not attend stroke review  
40 Management of stroke rehabilitation  
41 Acute stroke care  
42 Haemorrhagic stroke  
43 Emergency hospital admission to stroke service  
44 Cerebellar stroke  
45 History of ischaemic stroke  
46 Cerebral ischaemic stroke due to dissection of artery  
47 Cerebral ischaemic stroke due to global hypoperfusion with watershed infarct  
48 Cerebral ischaemic stroke due to hypercoagulable state  
49 Cerebral ischaemic stroke co-occurrent with subarachnoid haemorrhage  
50 Cryptogenic stroke

1 Acute stroke due to occlusion of left posterior cerebral artery  
2 Acute stroke of brainstem  
3 Acute ischaemic stroke  
4 Stroke monitoring  
5 Stroke in the puerperium  
6 Central post-stroke pain  
7 Stroke due to basilar artery thrombus  
8 Stroke due to thrombus of right middle cerebral artery  
9 Stroke due to thrombus of left middle cerebral artery  
10 Stroke care plan  
11 Stroke due to cerebral arterial occlusion  
12 Stroke unspecified  
13 Stroke/CVA - undefined  
14 Stroke  
15 Stroke monitoring administration  
16 Stroke monitoring invite 1  
17 Stroke monitoring invite 2  
18 Stroke monitoring invite 3  
19 Stroke 6 month review  
20 Mitoch myopath/encephalopath/lactic acidosis/stroke-like episode  
21 Central post-stroke pain  
22 Stroke self-management plan review  
23 Stroke self-management plan agreed  
24 Stroke annual review  
25 Stroke initial post discharge review  
26 Stroke rehabilitation  
27 Stroke  
28 Stroke of uncertain pathology  
29 Stroke test positive  
30 Stroke test negative  
31 Stroke clinic  
32 Stroke impact scale version 3.0  
33 Stroke impact scale version 3.0 score  
34 Stroke/cerebrovascular accident 6 month review  
35 Stroke medicine  
36 Cerebral infarct due to thrombosis of precerebral arteries  
37 Cerebral infarction due to embolism of precerebral arteries  
38 Cerebral infarction due to thrombosis of cerebral arteries  
39 Cerebral infarction due to embolism of cerebral arteries  
40 Sequelae of cerebral infarction  
41 [X]Other cerebral infarction  
42 Cerebral infarction  
43 Left sided cerebral infarction  
44 Right sided cerebral infarction  
45 Occlusion and stenosis of cerebral arteries, not resulting in cerebral infarction  
46 [X]Cerebrl infarctn due/unspcf occlusn or sten/cerebrl artr  
47 Cerebral infarction due to cerebral venous thrombosis, non-pyogenic  
48 Cerebral infarction due to occlusion of precerebral artery  
49 Cerebrl infarctn due/unspcf occlusn or sten/cerebrl artr  
50 Cerebral autosomal dominant arteriopathy with subcortical infarcts and leukoencephalopathy

1 Cerebral infarction with haemorrhagic transformation  
2 Cause of Death- Cerebral Infarct  
3 Surveillance of Cerebral Palsy in Europe classification - predominant pattern B.2 - sequelae of intraventricular I  
4 Surveillance of Cerebral Palsy in Europe classification - predominant pattern C.3 - infarct of the middle cerebra  
5 Old cerebral infarction on imaging  
6 Cerebral infarction due to occlusion of cerebral artery  
7 Cerebral infarction due to stenosis of cerebral artery  
8 Anterior cerebral circulation infarction  
9 Total anterior cerebral circulation infarction  
10 TACI - Total anterior cerebral circulation infarction  
11 Partial anterior cerebral circulation infarction  
12 PACI - Partial anterior cerebral circulation infarction  
13 Posterior cerebral circulation infarction  
14 Haemorrhagic cerebral infarction  
15 Anterior cerebral circulation haemorrhagic infarction  
16 Posterior cerebral circulation haemorrhagic infarction  
17 Occipital cerebral infarction  
18 Cerebral infarction due to embolism of middle cerebral artery  
19 Cerebral infarction due to thrombosis of middle cerebral artery  
20 Silent cerebral infarct  
21 Sequela of ischaemic cerebral infarction  
22 Cerebral degeneration in mucopolysaccharidoses  
23 Cerebrovascular accident  
24 [V]Personal history of cerebrovascular accident (CVA)  
25 Cerebrovascular accident due to thrombus of left carotid artery  
26 Cerebrovascular accident due to thrombus of basilar artery  
27 Cerebrovascular accident due to thrombus of right carotid artery  
28 Cerebrovascular accident due to thrombus of right middle cerebral artery  
29 Cerebrovascular accident due to thrombus of left middle cerebral artery  
30 Cerebrovascular accident due to occlusion of left pontine artery  
31 Cerebrovascular accident due to occlusion of right posterior cerebral artery  
32 Cerebrovascular accident due to occlusion of left middle cerebral artery  
33 Cerebrovascular accident due to occlusion of left posterior cerebral artery  
34 Cerebrovascular accident due to occlusion of right middle cerebral artery  
35 Cerebrovascular accident due to occlusion of right middle cerebral artery by embolus  
36 CVA - cerebrovascular accident due to cerebral artery occlusion  
37 CVA - cerebrovascular accident in the puerperium  
38 CVA - Cerebrovascular accident  
39 History of cerebrovascular accident  
40 Suspected cerebrovascular accident  
41 Cerebrovascular accident care plan  
42 Left sided cerebral hemisphere cerebrovascular accident  
43 Right sided cerebral hemisphere cerebrovascular accident  
44 Extension of cerebrovascular accident  
45 Cerebrovascular accident annual review  
46 Cerebrovascular accident due to stenosis of bilateral carotid arteries  
47 History of embolic cerebrovascular accident  
48 History of cerebrovascular accident due to ischaemia  
49 Cerebrovascular accident due to occlusion of bilateral pontine arteries  
50 Acute cerebrovascular accident due to stenosis of left carotid artery



1 Acute cerebrovascular accident due to occlusion of left middle cerebral artery  
2 Acute cerebrovascular accident due to occlusion of right posterior cerebral artery  
3 Acute cerebrovascular accident due to occlusion of right middle cerebral artery  
4 Acute cerebrovascular accident due to occlusion of right carotid artery  
5 Acute cerebrovascular accident due to occlusion of left carotid artery  
6 Acute cerebrovascular accident of basal ganglia  
7 Acute cerebrovascular accident of brainstem  
8 Acute cerebrovascular accident due to stenosis of right carotid artery  
9 Acute cerebrovascular accident due to occlusion of right cerebellar artery  
10 Acute cerebrovascular accident due to ischaemia  
11 Acute cerebrovascular accident due to occlusion of left cerebellar artery  
12 Acute cerebrovascular accident due to embolism of right middle cerebral artery  
13 Acute cerebrovascular accident due to embolism of left middle cerebral artery  
14 Left sided CVA  
15 Right sided CVA  
16 H/O: CVA  
17 CVA annual review  
18 CVA unspecified  
19 [RFC] CVA  
20 Presenile dementia  
21 Senile dementia  
22 H/O: dementia  
23 Uncomplicated senile dementia  
24 Uncomplicated presenile dementia  
25 Presenile dementia with delirium  
26 Presenile dementia with paranoia  
27 Presenile dementia with depression  
28 Presenile dementia NOS  
29 Senile dementia with depressive or paranoid features  
30 Senile dementia with paranoia  
31 Senile dementia with depression  
32 Senile dementia with depressive or paranoid features NOS  
33 Senile dementia with delirium  
34 Uncomplicated arteriosclerotic dementia  
35 Arteriosclerotic dementia with delirium  
36 Arteriosclerotic dementia with paranoia  
37 Arteriosclerotic dementia with depression  
38 Arteriosclerotic dementia NOS  
39 Drug-induced dementia  
40 Dementia in conditions EC  
41 [X]Dementia in Alzheimer's disease  
42 [X]Dementia in Alzheimer's dis, atypical or mixed type  
43 [X]Dementia in Alzheimer's disease, unspecified  
44 [X]Other vascular dementia  
45 [X]Vascular dementia, unspecified  
46 Dementia associated with another disease  
47 Dementia due to Pick's disease  
48 Dementia due to Creutzfeldt Jakob disease  
49 Dementia due to Huntington chorea  
50 Dementia in Parkinsons disease



1  
2 [X]Dementia in other specified diseases classif elsewhere  
3 [X]Delirium not superimposed on dementia, so described  
4 [X]Delirium superimposed on dementia  
5 Alcoholic dementia  
6 Other alcoholic dementia  
7 Arteriosclerotic dementia  
8 Subcortical dementia  
9 Dementia due to and following injury of head  
10 Senile/presenile dementia  
11 Exception reporting - dementia quality indicators  
12 Excepted from dementia quality indicators - informed dissent  
13 [X] Presenile dementia NOS  
14 Cerebral degeneration presenting primarily with dementia  
15 [X] Senile dementia NOS  
16 [X] Senile dementia, depressed or paranoid type  
17 Dementia  
18 [X]Alcoholic dementia NOS  
19 [X]Alzheimer's dementia unspec  
20 [X]Arteriosclerotic dementia  
21 Dementia in Alzheimer's disease with early onset  
22 Dementia in Alzheimer's disease with late onset  
23 [X]Dementia in human immunodef virus [HIV] disease  
24 [X]Dementia infantalis  
25 Mixed cortical and subcortical vascular dementia  
26 [X]Multi-infarct dementia  
27 Dementia monitoring administration  
28 Dementia monitoring  
29 Dementia monitoring first letter  
30 Dementia annual review  
31 Dementia monitoring second letter  
32 Dementia monitoring third letter  
33 Dementia monitoring verbal invitation  
34 Dementia monitoring telephone invitation  
35 [X]Predominantly cortical dementia  
36 [X]Presenile dementia,Alzheimer's type  
37 [X]Primary degen dementia of Alzheimer's type, senile onset  
38 [X]Primary degen dementia, Alzheimer's type, presenile onset  
39 [X]Senile dementia,Alzheimer's type  
40 Subcortical vascular dementia  
41 Vascular dementia  
42 Vascular dementia of acute onset  
43 Multi-infarct dementia  
44 Dementia  
45 Other senile/presenile dement.  
46 Senile and presenile dementias  
47 Senile dementia - simple type  
48 Senile dementia-acute confused  
49 [D] Vascular dementia  
50 [D] Dementia with Lewy bodies  
51 [D] Dementia

1 [D] Dementia in Alzheimer's disease  
2 Dementia review  
3 Dementia review with third party  
4 [RFC] Dementia  
5 Excepted from dementia quality indicators - patient unsuitable  
6 Dementia confirmed  
7 Dementia care plan  
8 Dementia monitoring in primary care  
9 Dementia monitoring in secondary care  
10 Did not attend dementia monitoring  
11 Dementia medication review  
12 3D study - problems with dementia management  
13 Referral to dementia early intervention service  
14 Dementia post diagnostic support (Scotland)  
15 Dementia stage at diagnosis  
16 Dementia stage at diagnosis - early (mild)  
17 Dementia stage at diagnosis - mid (moderate)  
18 Dementia stage at diagnosis - late (severe)  
19 Dementia stage at diagnosis - undetermined  
20 Dementia stage at diagnosis - not known  
21 Person centred dementia support plan (Scotland)  
22 Dementia support plan (Scot) in place at 12 months  
23 Dementia support plan (Scot) partly in place at 12 months  
24 Dementia support plan (Scot) absent at 12 months  
25 Dementia post diagnostic support (PDS) - transition arrangements  
26 Dementia PDS transition - referred for community care support  
27 Dementia post diagnostic support (PDS)(Scot)- 5 pillar model  
28 Dementia PDS (Scot) - planning for future care status  
29 Dementia PDS (Scot) - peer support status  
30 Dementia PDS (Scot) - supporting community connections status  
31 Dementia PDS (Scot) support community connections - pillar met  
32 Dementia PDS planning future decision-making -pillar partially met  
33 Dementia link worker details  
34 Dementia case finding question: positive response from patient  
35 Dementia in Alzheimer's disease with early onset, without additional symptoms  
36 Dementia in Alzheimer's disease with early onset, other symptoms, predominantly delusional  
37 Mental & behav dis due to sed/hypntcs: resid & late-onset psychot dis, dementia  
38 Mental & behav dis due to use opioids: resid & late-onset psychot dis, dementia  
39 Dementia in Alzheimer's disease with early onset, other symptoms, predominantly hallucinatory  
40 Unspecified dementia, without additional symptoms  
41 Unspecified dementia, other symptoms, predominantly delusional  
42 Unspecified dementia, other symptoms, predominantly hallucinatory  
43 Unspecified dementia, other symptoms, predominantly depressive  
44 Unspecified dementia, other mixed symptoms  
45 Dementia in Alzheimer's disease with early onset, other symptoms, predominantly depressive  
46 Dementia in Alzheimer's disease with early onset, other mixed symptoms  
47 Dementia in Alzheimer's disease with late onset, without additional symptoms  
48 Dementia in Alzheimer's disease with late onset, other symptoms, predominantly delusional  
49 Dementia in Alzheimer's disease with late onset, other symptoms, predominantly hallucinatory  
50 Dementia in Alzheimer's disease with late onset, other symptoms, predominantly depressive

1 Dementia in Alzheimer's disease with late onset, other mixed symptoms  
2 Dementia in Alzheimer's dis, atypical or mixed type, without additional symptoms  
3 Dementia in Alzheimer's dis, atypical or mixed type, other symptoms, predominantly delusional  
4 Dementia in Alzheimer's dis, atypical or mixed type, other symptoms, predominantly hallucinatory  
5 Dementia in Alzheimer's dis, atypical or mixed type, other symptoms, predominantly depressive  
6 Dementia in Alzheimer's dis, atypical or mixed type, other mixed symptoms  
7 Dementia in Alzheimer's disease, unspecified, without additional symptoms  
8 Dementia in Alzheimer's disease, unspecified, other symptoms, predominantly delusional  
9 Mental & behav dis due to cannabinoids: resid & late-onset psychot dis, dementia  
10 Dementia in Alzheimer's disease, unspecified, other symptoms, predominantly depressive  
11 Dementia in Alzheimer's disease, unspecified, other mixed symptoms  
12 Vascular dementia of acute onset, without additional symptoms  
13 Vascular dementia of acute onset, other symptoms, predominantly delusional  
14 Vascular dementia of acute onset, other mixed symptoms  
15 Multi-infarct dementia, other symptoms, predominantly depressive  
16 Multi-infarct dementia, other mixed symptoms  
17 Subcortical vascular dementia, without additional symptoms  
18 Subcortical vascular dementia, other symptoms, predominantly delusional  
19 Subcortical vascular dementia, other symptoms, predominantly hallucinatory  
20 Subcortical vascular dementia, other mixed symptoms  
21 Mixed cortical and subcortical vascular dementia, without additional symptoms  
22 Mixed cortical and subcortical vascular dementia, other symptoms, predominantly delusional  
23 Mixed cortical and subcortical vascular dementia, other symptoms, predominantly hallucinatory  
24 Mixed cortical and subcortical vascular dementia, other symptoms, predominantly depressive  
25 Mixed cortical and subcortical vascular dementia, other mixed symptoms  
26 Mental and behav dis due to vol solvents: resid & late-onset psychotic dis, dementia  
27 Other vascular dementia, without additional symptoms  
28 Other vascular dementia, other symptoms, predominantly delusional  
29 Other vascular dementia, other symptoms, predominantly hallucinatory  
30 Other vascular dementia, other symptoms, predominantly depressive  
31 Other vascular dementia, other mixed symptoms  
32 Vascular dementia, unspecified, without additional symptoms  
33 Vascular dementia, unspecified, other symptoms, predominantly hallucinatory  
34 Mental and behav dis due to hallucinogens: resid & late-onset psychot dis, dementia  
35 Mental & behav dis due to use cocaine: resid & late-onset psychot dis, dementia  
36 Mental and behav dis mlti drg use/oth psych subs: resid/late psychot dis, dementia  
37 Mental & behav dis due to tobacco: resid & late-onset psychot dis, dementia  
38 Mental & behav dis due to use alcohol: resid & late-onset psychot dis, dementia  
39 Mental and behav dis due to other stimulants inc caffeine: resid/late-onset psycht dis, dementia  
40 Vascular dementia, unspecified, other mixed symptoms  
41 Suspected dementia  
42 Referral to dementia service  
43 Dementia care plan  
44 Assessment of psychotic and behavioural symptoms of dementia  
45 Antipsychotic drug therapy for dementia  
46 Dementia advance care plan declined  
47 Dementia advance care plan agreed  
48 Review of dementia advance care plan  
49 Dementia medication review  
50 Dementia care plan agreed

1 Dementia care plan reviewed  
2 Dementia care plan declined  
3 Dementia care plan review declined  
4 Dementia advance care plan  
5 Dementia advance care plan review declined  
6 Dementia assessment care plan  
7 Dementia associated with alcoholism  
8 Primary degenerative dementia of the Alzheimer type, senile onset, with delirium  
9 Primary degenerative dementia of the Alzheimer type, presenile onset, uncomplicated  
10 Shared care prescribing of drug for dementia  
11 Shared care prescribing of drugs for dementia declined  
12 Dialysis dementia  
13 Vascular dementia, with delirium  
14 Predominantly cortical vascular dementia  
15 Offer of dementia advance care planning review declined  
16 Review of dementia advance care plan  
17 Dementia advance care plan agreed  
18 Multi-infarct dementia with delusions  
19 Primary degenerative dementia of the Alzheimer type, senile onset, with depression  
20 Alzheimer dementia  
21 MID - Multi-infarct dementia  
22 VAD - Vascular dementia  
23 Parkinson-dementia complex of Guam  
24 Primary degenerative dementia of the Alzheimer type, senile onset, uncomplicated  
25 Multi-infarct dementia, uncomplicated  
26 Dementia of the Lewy body type  
27 Subcortical atherosclerotic dementia  
28 History of dementia  
29 Amyotrophic lateral sclerosis with dementia  
30 Frontotemporal dementia  
31 Semantic dementia  
32 Patchy dementia  
33 Dementia of frontal lobe type  
34 DFT - Dementia frontal lobe type  
35 Senile dementia of the Lewy body type  
36 Lewy body dementia  
37 Senile dementia with delusion  
38 Senile dementia with psychosis  
39 Dementia management  
40 Primary degenerative dementia of the Alzheimer type, presenile onset  
41 Dementia of the Alzheimers type with early onset  
42 Presenile dementia, Alzheimer's type  
43 Dementia in Alzheimer's disease - type 2  
44 Primary degenerative dementia of the Alzheimer type, senile onset  
45 Dementia of the Alzheimers type, late onset  
46 SDAT - Senile dementia, Alzheimer's type  
47 Dementia in Alzheimer's disease - type 1  
48 Dementia associated with AIDS  
49 Acquired immune deficiency syndrome dementia complex  
50 Dementia associated with Parkinson's Disease

1 Dementia associated with Parkinson Disease  
2 Dementia due to Huntingtons disease  
3 Dementia associated with normal pressure hydrocephalus  
4 Dementia associated with multiple sclerosis  
5 Post-traumatic dementia with behavioural change  
6 Frontotemporal dementia with parkinsonism-17  
7 Dementia co-occurrent with human immunodeficiency virus infection  
8 Behavioural variant of frontotemporal dementia  
9 Ischaemic vascular dementia  
10 Rapidly progressive dementia  
11 Epilepsy co-occurrent and due to dementia  
12 Delirium superimposed on dementia  
13 Dementia due to chronic subdural haematoma  
14 Dementia with Down syndrome  
15 Dementia of the Alzheimer type with behavioural disturbance  
16 Dementia with behavioural disturbance  
17 Dementia due to Picks disease  
18 Dementia due to Pick disease  
19 Primary degenerative dementia  
20 Early onset dementia with delusions  
21 Mixed dementia  
22 Altered behaviour in Huntington's dementia  
23 Epileptic dementia with behavioural disturbance  
24 Anti-dementia drug therapy  
25 Dementia due to Parkinson's disease  
26 Dementia due to Parkinsons disease  
27 Dementia due to Parkinson disease  
28 Lewy body dementia with behavioural disturbance  
29 Lewy body dementia with behavioral disturbance  
30 Vascular dementia with behavioural disturbance  
31 Vascular dementia with behavioral disturbance  
32 Dementia monitoring invitation  
33 Dementia care plan  
34 Behavioural and psychological symptoms of dementia  
35 BPSD - behavioral and psychological symptoms of dementia  
36 BPSD - behavioural and psychological symptoms of dementia  
37 Behavioral and psychological symptoms of dementia  
38 Dementia advance care planning declined  
39 Dementia with mixed etiology  
40 MVAD - Mixed vascular Alzheimer dementia  
41 Dementia with mixed aetiology  
42 QOF (Quality and Outcomes Framework) dementia quality indicator-related care invitation  
43 QOF (Quality and Outcomes Framework) dementia quality indicator-related care invitation using preferred me  
44 Cortical vascular dementia  
45 Senile degeneration of brain  
46 Senile or presenile psychoses NOS  
47 [D]Senility, without psychosis NOS  
48 Senile and presenile organic psychotic conditions  
49 Other senile and presenile organic psychoses  
50 Senility

1 O/E - senile - old age  
2 O/E - senility - no psychosis  
3 [D]Senility  
4 [D] Senile confusion  
5 [X] Presenile psychosis NOS  
6 [X] Senile psychosis NOS  
7 Senile brain degeneration  
8 Alzheimer's disease  
9 [X]Other Alzheimer's disease  
10 Alzheimer's disease with early onset  
11 Alzheimer's disease with late onset  
12 [X]Alzheimer's disease type 1  
13 [X]Alzheimer's disease type 2  
14 [RFC] Alzheimer's disease  
15 Cause of Death- Alzheimer'S Disease  
16 Adverse reaction to Alzest  
17 AD - Alzheimer's disease  
18 Alzheimer disease  
19 Lewy body variant of Alzheimer's disease  
20 Familial Alzheimer's disease of early onset  
21 Non-familial Alzheimer's disease of early onset  
22 Familial Alzheimer's disease of late onset  
23 Non-familial Alzheimer's disease of late onset  
24 Focal Alzheimer's disease  
25 Non-Alzheimer's progressive dysphasia  
26 Progressive aphasia in Alzheimer's disease  
27 Non-amnestic Alzheimer disease  
28 Altered behaviour in Alzheimer's disease  
29 Early onset Alzheimer's disease with behavioural disturbance  
30 Early onset Alzheimers disease with behavioral disturbance  
31 Delusions in Alzheimer's disease  
32 Depressed mood in Alzheimer's disease  
33 Alzheimer's disease co-occurrent with delirium  
34 Foster-Kennedy syndrome  
35 Motor neurone disease NOS  
36 Kennedy syndrome  
37 Motor neurone disease  
38 [RFC] Motor neurone disease  
39 [RFC] Motor neurone disease  
40 Motor neuron disease  
41 MND - Motor neurone disease  
42 Lower motor neuron disease  
43 Polymyositis  
44 Interstitial myositis  
45 Orbital myositis  
46 Poikilodermatomyositis  
47 Lung disease with polymyositis  
48 Myositis in sarcoidosis  
49 Myalgia and myositis unspecified  
50 Fibromyositis

1 [X]Other dermatomyositis  
2 [X]Dermatopolymyositis, unspecified  
3 Dermatopolymyositis in neoplastic disease  
4 Dermatomyositis  
5 Juvenile dermatomyositis  
6 [X]Dermato(poly)myositis in neoplastic disease CE  
7 Dermatopolymyositis, unspecified  
8 Inclusion body myositis  
9 Dermatomyositis sine myositis  
10 Amyopathic dermatomyositis  
11 Polymyositis with malignant disease  
12 Dermatomyositis with malignant disease  
13 Autoimmune myositis  
14 Idiopathic inflammatory myositis  
15 Orbital myositis of both eyes  
16 Postencephalitic parkinsonism  
17 Syphilitic parkinsonism  
18 Parkinson's disease  
19 Dementia in Parkinsons disease  
20 Parkinson's disease NOS  
21 Orthostatic hypotension co-occurrent and due to Parkinson's disease  
22 [X]Other drug-induced secondary parkinsonism  
23 [X]Other secondary parkinsonism  
24 [X]Parkinsonism in diseases classified elsewhere  
25 [X]Secondary parkinsonism, unspecified  
26 [X]Secondary parkinsonism due to other external agents  
27 Vascular parkinsonism  
28 Multiple system atrophy, Parkinson variant  
29 Secondary parkinsonism due to other external agents  
30 Secondary parkinsonism  
31 Parkinsonism secondary to drugs  
32 Parkinsonism due to drug  
33 Cerebral degeneration in Parkinson's disease  
34 Secondary Parkinsonism - drugs  
35 [RFC] Parkinson's disease  
36 [RFC] Parkinson's disease  
37 History of Parkinson's disease  
38 Reason for referral: Parkinsons Disease  
39 Referral to community Parkinson's disease clinical nurse specialist  
40 Referral to community Parkinson's service  
41 Parkinsonism  
42 Idiopathic Parkinson's disease  
43 Parkinson disease  
44 PD - Parkinson's disease  
45 Parkinsons disease  
46 Parkinson-dementia complex of Guam  
47 Dementia associated with Parkinson's Disease  
48 Dementia associated with Parkinson Disease  
49 Multiple system atrophy, Parkinson's variant  
50 Frontotemporal dementia with parkinsonism-17



1 Early onset Parkinson disease  
2 Early onset Parkinson's disease  
3 Early onset Parkinson's disease  
4 Psychosis co-occurrent and due to Parkinson's disease  
5 Adult-onset dystonia parkinsonism  
6 Early-onset dystonia parkinsonism  
7 Atypical Parkinsonism  
8 Dementia due to Parkinson's disease  
9 Dementia due to Parkinsons disease  
10 Dementia due to Parkinson disease  
11 Parkinsonian pyramidal syndrome  
12 Postpolio syndrome  
13 H/O: poliomyelitis  
14 Notification of acute polio  
15 Acute paralytic non-bulbar poliomyelitis  
16 Acute paralytic poliomyelitis  
17 Acute paralytic poliomyelitis, vaccine-associated  
18 Acute paralytic poliomyelitis, wild virus, imported  
19 Acute paralytic poliomyelitis, wild virus, indigenous  
20 Acute poliomyelitis NOS  
21 [X]Acute paralytic poliomyelitis, other and unspecified  
22 [X]Acute poliomyelitis, unspecified  
23 Poliomyelitis encephalitis  
24 Post polio vaccination encephalitis  
25 Osteopathy from poliomyelitis  
26 Poliomyelitis osteopathy of unspecified site  
27 Poliomyelitis osteopathy of the shoulder region  
28 Poliomyelitis osteopathy of the upper arm  
29 Poliomyelitis osteopathy of the forearm  
30 Poliomyelitis osteopathy of the hand  
31 Poliomyelitis osteopathy of the pelvic region and thigh  
32 Poliomyelitis osteopathy of the lower leg  
33 Poliomyelitis osteopathy of the ankle and foot  
34 Poliomyelitis osteopathy of other specified sites  
35 Poliomyelitis osteopathy of multiple sites  
36 Poliomyelitis osteopathy NOS  
37 Late effects of acute poliomyelitis  
38 Acute paralytic bulbar poliomyelitis  
39 Acute non-paralytic poliomyelitis  
40 Acute poliomyelitis  
41 Poliomyelitis & other non-arthropod-borne viral diseases-CNS  
42 [D]Post polio exhaustion  
43 [X]Sequelae of poliomyelitis  
44 Polioencephalitis  
45 Post poliomyelitis syndrome  
46 Late effects of poliomyelitis  
47 Sequelae of poliomyelitis  
48 Polio  
49 Poliomyelitis  
50 Athetoid cerebral palsy  
51 Cerebral palsy



1  
2 Other congenital cerebral palsy  
3 Ataxic infantile cerebral palsy  
4 Other infantile cerebral palsy NOS  
5 Congenital cerebral palsy NOS  
6 [X]Cerebral palsy and other paralytic syndromes  
7 [X]Other infantile cerebral palsy  
8 Infantile cerebral palsy  
9 Spastic cerebral palsy  
10 Dyskinetic cerebral palsy  
11 Congenital cerebral palsy  
12 Congenital spastic cerebral palsy  
13 Cerebral palsy, not congenital or infantile, acute  
14 Ataxic diplegic cerebral palsy  
15 Neuromuscular scoliosis due to cerebral palsy  
16 Athetoid cerebral palsy  
17 Cerebral palsy with spastic diplegia  
18 Flaccid infantile cerebral palsy  
19 [RFC] Cerebral palsy  
20 [RFC] Cerebral palsy  
21 Spastic diplegic cerebral palsy  
22 Spastic quadriplegic cerebral palsy  
23 Other cerebral palsy  
24 Cerebral palsy NOS  
25 Spastic hemiplegic cerebral palsy  
26 Choreo-athetotic cerebral palsy  
27 Choreoathetoid cerebral palsy  
28 Bilateral spastic cerebral palsy  
29 Hemiplegic cerebral palsy  
30 Quadriplegic cerebral palsy  
31 Diplegic cerebral palsy  
32 Spastic diplegic cerebral palsy  
33 Hypotonic cerebral palsy  
34 Dystonic/rigid cerebral palsy  
35 Ataxic cerebral palsy  
36 Dystonic cerebral palsy  
37 Bilateral cerebral palsy  
38 Bilateral spastic cerebral palsy  
39 [X]Cerebral palsy and other paralytic syndromes  
40  
41  
42  
43  
44  
45  
46  
47  
48  
49  
50  
51  
52  
53  
54  
55  
56  
57  
58  
59  
60

1  
2  
3  
4  
5  
6  
7  
8  
9  
10  
11  
12  
13  
14  
15  
16  
17  
18  
19  
20  
21  
22  
23  
24  
25  
26  
27  
28  
29  
30  
31  
32  
33  
34  
35  
36  
37  
38  
39  
40  
41  
42  
43  
44  
45  
46  
47  
48  
49  
50  
51  
52  
53  
54  
55  
56  
57  
58  
59  
60

For peer review only

1  
2  
3  
4  
5  
6  
7  
8  
9  
10  
11  
12  
13  
14  
15  
16  
17  
18  
19  
20  
21  
22  
23  
24  
25  
26  
27  
28  
29  
30  
31  
32  
33  
34  
35  
36  
37  
38  
39  
40  
41  
42  
43  
44  
45  
46  
47  
48  
49  
50  
51  
52  
53  
54  
55  
56  
57  
58  
59  
60

For peer review only

1  
2  
3  
4  
5  
6  
7  
8  
9  
10  
11  
12  
13  
14  
15  
16  
17  
18  
19  
20  
21  
22  
23  
24  
25  
26  
27  
28  
29  
30  
31  
32  
33  
34  
35  
36  
37  
38  
39  
40  
41  
42  
43  
44  
45  
46  
47  
48  
49  
50  
51  
52  
53  
54  
55  
56  
57  
58  
59  
60

For peer review only

1  
2  
3  
4  
5  
6  
7  
8  
9  
10  
11  
12  
13  
14  
15  
16  
17  
18  
19  
20  
21  
22  
23  
24  
25  
26  
27  
28  
29  
30  
31  
32  
33  
34  
35  
36  
37  
38  
39  
40  
41  
42  
43  
44  
45  
46  
47  
48  
49  
50  
51  
52  
53  
54  
55  
56  
57  
58  
59  
60

For peer review only

1  
2  
3  
4  
5  
6  
7  
8  
9  
10  
11  
12  
13  
14  
15  
16  
17  
18  
19  
20  
21  
22  
23  
24  
25  
26  
27  
28  
29  
30  
31  
32  
33  
34  
35  
36  
37  
38  
39  
40  
41  
42  
43  
44  
45  
46  
47  
48  
49  
50  
51  
52  
53  
54  
55  
56  
57  
58  
59  
60

For peer review only

1  
2  
3  
4  
5  
6  
7  
8  
9  
10  
11  
12  
13  
14  
15  
16  
17  
18  
19  
20  
21  
22  
23  
24  
25  
26  
27  
28  
29  
30  
31  
32  
33  
34  
35  
36  
37  
38  
39  
40  
41  
42  
43  
44  
45  
46  
47  
48  
49  
50  
51  
52  
53  
54  
55  
56  
57  
58  
59  
60

For peer review only

1  
2  
3  
4  
5  
6  
7  
8  
9  
10  
11  
12  
13  
14  
15  
16  
17  
18  
19  
20  
21  
22  
23  
24  
25  
26  
27  
28  
29  
30  
31  
32  
33  
34  
35  
36  
37  
38  
39  
40  
41  
42  
43  
44  
45  
46  
47  
48  
49  
50  
51  
52  
53  
54  
55  
56  
57  
58  
59  
60

For peer review only



1  
2  
3  
4  
5  
6  
7  
8  
9  
10  
11  
12  
13  
14  
15  
16  
17  
18  
19  
20  
21  
22  
23  
24  
25  
26  
27  
28  
29  
30  
31  
32  
33  
34  
35  
36  
37  
38  
39  
40  
41  
42  
43  
44  
45  
46  
47  
48  
49  
50  
51  
52  
53  
54  
55  
56  
57  
58  
59  
60

For peer review only

1  
2  
3  
4  
5  
6  
7  
8  
9  
10  
11  
12  
13  
14  
15  
16  
17  
18  
19  
20  
21  
22  
23  
24  
25  
26  
27  
28  
29  
30  
31  
32  
33  
34  
35  
36  
37  
38  
39  
40  
41  
42  
43  
44  
45  
46  
47  
48  
49  
50  
51  
52  
53  
54  
55  
56  
57  
58  
59  
60

For peer review only

1  
2  
3  
4  
5  
6  
7  
8  
9  
10  
11  
12  
13  
14  
15  
16  
17  
18  
19  
20  
21  
22  
23  
24  
25  
26  
27  
28  
29  
30  
31  
32  
33  
34  
35  
36  
37  
38  
39  
40  
41  
42  
43  
44  
45  
46  
47  
48  
49  
50  
51  
52  
53  
54  
55  
56  
57  
58  
59  
60

For peer review only

1  
2  
3  
4  
5  
6  
7  
8  
9  
10  
11  
12  
13  
14  
15  
16  
17  
18  
19  
20  
21  
22  
23  
24  
25  
26  
27  
28  
29  
30  
31  
32  
33  
34  
35  
36  
37  
38  
39  
40  
41  
42  
43  
44  
45  
46  
47  
48  
49  
50  
51  
52  
53  
54  
55  
56  
57  
58  
59  
60

For peer review only

1  
2  
3  
4  
5  
6  
7  
8  
9  
10  
11  
12  
13  
14  
15  
16  
17  
18  
19  
20  
21  
22  
23  
24  
25  
26  
27  
28  
29  
30  
31  
32  
33  
34  
35  
36  
37  
38  
39  
40  
41  
42  
43  
44  
45  
46  
47  
48  
49  
50  
51  
52  
53  
54  
55  
56  
57  
58  
59  
60

tion

For peer review only

1  
2  
3  
4  
5  
6  
7  
8  
9  
10  
11  
12  
13  
14  
15  
16  
17  
18  
19  
20  
21  
22  
23  
24  
25  
26  
27  
28  
29  
30  
31  
32  
33  
34  
35  
36  
37  
38  
39  
40  
41  
42  
43  
44  
45  
46  
47  
48  
49  
50  
51  
52  
53  
54  
55  
56  
57  
58  
59  
60

For peer review only

1  
2  
3  
4  
5  
6  
7  
8  
9  
10  
11  
12  
13  
14  
15  
16  
17  
18  
19  
20  
21  
22  
23  
24  
25  
26  
27  
28  
29  
30  
31  
32  
33  
34  
35  
36  
37  
38  
39  
40  
41  
42  
43  
44  
45  
46  
47  
48  
49  
50  
51  
52  
53  
54  
55  
56  
57  
58  
59  
60

For peer review only

1  
2  
3  
4  
5  
6  
7  
8  
9  
10  
11  
12  
13  
14  
15  
16  
17  
18  
19  
20  
21  
22  
23  
24  
25  
26  
27  
28  
29  
30  
31  
32  
33  
34  
35  
36  
37  
38  
39  
40  
41  
42  
43  
44  
45  
46  
47  
48  
49  
50  
51  
52  
53  
54  
55  
56  
57  
58  
59  
60

For peer review only



1  
2  
3  
4  
5  
6  
7  
8  
9  
10  
11  
12  
13  
14  
15  
16  
17  
18  
19  
20  
21  
22  
23  
24  
25  
26  
27  
28  
29  
30  
31  
32  
33  
34  
35  
36  
37  
38  
39  
40  
41  
42  
43  
44  
45  
46  
47  
48  
49  
50  
51  
52  
53  
54  
55  
56  
57  
58  
59  
60

For peer review only

1  
2  
3  
4  
5  
6  
7  
8  
9  
10  
11  
12  
13  
14  
15  
16  
17  
18  
19  
20  
21  
22  
23  
24  
25  
26  
27  
28  
29  
30  
31  
32  
33  
34  
35  
36  
37  
38  
39  
40  
41  
42  
43  
44  
45  
46  
47  
48  
49  
50  
51  
52  
53  
54  
55  
56  
57  
58  
59  
60

For peer review only

1  
2  
3  
4  
5  
6  
7  
8  
9  
10  
11  
12  
13  
14  
15  
16  
17  
18  
19  
20  
21  
22  
23  
24  
25  
26  
27  
28  
29  
30  
31  
32  
33  
34  
35  
36  
37  
38  
39  
40  
41  
42  
43  
44  
45  
46  
47  
48  
49  
50  
51  
52  
53  
54  
55  
56  
57  
58  
59  
60

For peer review only

| ICD-10 code | Term                                                                                             |
|-------------|--------------------------------------------------------------------------------------------------|
| F72.0       | Severe mental retardation with the statement of no, or minimal, impairment of behaviour          |
| F72.1       | Severe mental retardation significant impairment of behaviour requiring attention or treatment   |
| F72.8       | Severe mental retardation other impairments of behaviour                                         |
| F72.9       | Severe mental retardation without mention of impairment of behaviour                             |
| F73.0       | Profound mental retardation with the statement of no, or minimal, impairment of behaviour        |
| F73.1       | Profound mental retardation significant impairment of behaviour requiring attention or treatment |
| F73.8       | Profound mental retardation other impairments of behaviour                                       |
| F73.9       | Profound mental retardation without mention of impairment of behaviour                           |
| F78.1       | Other mental retardation significant impairment of behaviour requiring attention or treatment    |
| F80.3       | Acquired aphasia with epilepsy [Landau-Kleffner]                                                 |
| F84.2       | Rett syndrome                                                                                    |
| F84.3       | Other childhood disintegrative disorder                                                          |
| Q90.0       | Trisomy 21, meiotic nondisjunction                                                               |
| Q90.1       | Trisomy 21, mosaicism (mitotic nondisjunction)                                                   |
| Q90.2       | Trisomy 21, translocation                                                                        |
| Q90.9       | Down syndrome, unspecified                                                                       |
| Q91.0       | Trisomy 18, meiotic nondisjunction                                                               |
| Q91.1       | Trisomy 18, mosaicism (mitotic nondisjunction)                                                   |
| Q91.2       | Trisomy 18, translocation                                                                        |
| Q91.3       | Edwards syndrome, unspecified                                                                    |
| Q91.4       | Trisomy 13, meiotic nondisjunction                                                               |
| Q91.5       | Trisomy 13, mosaicism (mitotic nondisjunction)                                                   |
| Q91.6       | Trisomy 13, translocation                                                                        |
| Q91.7       | Patau syndrome, unspecified                                                                      |
| Q92.0       | Whole chromosome trisomy, meiotic nondisjunction                                                 |
| Q92.1       | Whole chromosome trisomy, mosaicism (mitotic nondisjunction)                                     |
| Q92.2       | Major partial trisomy                                                                            |
| Q92.3       | Minor partial trisomy                                                                            |
| Q92.7       | Triploidy and polyploidy                                                                         |
| Q92.8       | Other specified trisomies and partial trisomies of autosomes                                     |
| Q92.9       | Trisomy and partial trisomy of autosomes, unspecified                                            |
| Q93.3       | Deletion of short arm of chromosome 4                                                            |
| Q93.4       | Deletion of short arm of chromosome 5                                                            |
| Q93.5       | Other deletions of part of a chromosome                                                          |
| Q93.6       | Deletions seen only at prometaphase                                                              |
| Q93.7       | Deletions with other complex rearrangements                                                      |
| Q93.8       | Other deletions from the autosomes                                                               |
| Q93.9       | Deletion from autosomes, unspecified                                                             |
| Q95.2       | Balanced autosomal rearrangement in abnormal individual                                          |
| Q95.3       | Balanced sex/autosomal rearrangement in abnormal individual                                      |
| Q90.0       | Trisomy 21, meiotic nondisjunction                                                               |
| Q90.1       | Trisomy 21, mosaicism (mitotic nondisjunction)                                                   |
| Q90.2       | Trisomy 21, translocation                                                                        |
| Q90.9       | Down syndrome, unspecified                                                                       |
| G35         | Multiple sclerosis                                                                               |
| G40.3       | Generalized idiopathic epilepsy and epileptic syndromes                                          |
| G40.4       | Other generalized epilepsy and epileptic syndromes                                               |
| G40.5       | Special epileptic syndromes                                                                      |
| G40.6       | Grand mal seizures, unspecified (with or without petit mal)                                      |

|    |        |                                                                                      |
|----|--------|--------------------------------------------------------------------------------------|
| 1  |        |                                                                                      |
| 2  | G40.7  | Petit mal, unspecified, without grand mal seizures                                   |
| 3  | G40.8  | Other epilepsy                                                                       |
| 4  | G40.9  | Epilepsy, unspecified                                                                |
| 5  | G41.0  | Grand mal status epilepticus                                                         |
| 6  | G41.1  | Petit mal status epilepticus                                                         |
| 7  | G41.2  | Complex partial status epilepticus                                                   |
| 8  | G41.8  | Other status epilepticus                                                             |
| 9  | G41.9  | Status epilepticus, unspecified                                                      |
| 10 | G46.3  | Brain stem stroke syndrome                                                           |
| 11 | I63    | Cerebral infarction                                                                  |
| 12 | I63.0  | Cerebral infarction due to thrombosis of precerebral arteries                        |
| 13 | I63.1  | Cerebral infarction due to embolism of precerebral arteries                          |
| 14 | I63.2  | Cerebral infarction due to unspecified occlusion or stenosis of precerebral arteries |
| 15 | I63.3  | Cerebral infarction due to thrombosis of cerebral arteries                           |
| 16 | I63.4  | Cerebral infarction due to embolism of cerebral arteries                             |
| 17 | I63.5  | Cerebral infarction due to unspecified occlusion or stenosis of cerebral arteries    |
| 18 | I63.6  | Cerebral infarction due to cerebral venous thrombosis, nonpyogenic                   |
| 19 | I63.8  | Other cerebral infarction                                                            |
| 20 | I63.9  | Cerebral infarction, unspecified                                                     |
| 21 | I64    | Stroke, not specified as haemorrhage or infarction                                   |
| 22 | G30.0  | Alzheimer disease with early onset                                                   |
| 23 | G30.1  | Alzheimer disease with late onset                                                    |
| 24 | G30.8  | Other Alzheimer disease                                                              |
| 25 | G30.9  | Alzheimer disease, unspecified                                                       |
| 26 | F00.0  | Dementia in Alzheimer disease with early onset                                       |
| 27 | F00.1  | Dementia in Alzheimer disease with late onset                                        |
| 28 | F00.2  | Dementia in Alzheimer disease, atypical or mixed type                                |
| 29 | F00.9  | Dementia in Alzheimer disease, unspecified                                           |
| 30 | F01.0  | Vascular dementia of acute onset                                                     |
| 31 | F01.1  | Multi-infarct dementia                                                               |
| 32 | F01.2  | Subcortical vascular dementia                                                        |
| 33 | F01.3  | Mixed cortical and subcortical vascular dementia                                     |
| 34 | F01.8  | Other vascular dementia                                                              |
| 35 | F01.9  | Vascular dementia, unspecified                                                       |
| 36 | F02.0  | Dementia in Pick disease                                                             |
| 37 | F02.1  | Dementia in Creutzfeldt-Jakob disease                                                |
| 38 | F02.2  | Dementia in Huntington disease                                                       |
| 39 | F02.3  | Dementia in Parkinson disease                                                        |
| 40 | F02.4  | Dementia in human immunodeficiency virus [HIV] disease                               |
| 41 | F02.8  | Dementia in other specified diseases classified elsewhere                            |
| 42 | F03    | Unspecified dementia                                                                 |
| 43 | F04    | Organic amnesic syndrome, not induced by alcohol and other psychoactive substances   |
| 44 | F05.0  | Delirium not superimposed on dementia, so described                                  |
| 45 | F05.1  | Delirium superimposed on dementia                                                    |
| 46 | G12.2  | Motor neuron disease                                                                 |
| 47 | G12.20 | Motor neuron disease - Unspecified                                                   |
| 48 | G12.21 | Motor neuron disease - Amyotrophic lateral sclerosis                                 |
| 49 | G12.22 | Motor neuron disease - Progressive bulbar palsy                                      |
| 50 | G12.23 | Motor neuron disease - Primary lateral sclerosis                                     |
| 51 | G12.24 | Motor neuron disease - Familial motor neuron disease                                 |

|    |        |                                                          |
|----|--------|----------------------------------------------------------|
| 1  |        |                                                          |
| 2  | G12.25 | Motor neuron disease - Progressive spinal muscle atrophy |
| 3  | G12.29 | Motor neuron disease - Other motor neuron disease        |
| 4  | G20    | Parkinson Disease                                        |
| 5  | G21.1  | Other drug-induced secondary parkinsonism                |
| 6  | G21.2  | Secondary parkinsonism due to other external agents      |
| 7  | G21.3  | Postencephalitic parkinsonism                            |
| 8  | G21.4  | Vascular parkinsonism                                    |
| 9  | G21.8  | Other secondary parkinsonism                             |
| 10 | G21.9  | Secondary parkinsonism, unspecified                      |
| 11 |        |                                                          |
| 12 | G80    | Cerebral Palsy                                           |
| 13 | G80.0  | Spastic quadriplegic cerebral palsy                      |
| 14 | G80.1  | Spastic diplegic cerebral palsy                          |
| 15 | G80.2  | Spastic hemiplegic cerebral palsy                        |
| 16 | G80.3  | Dyskinetic cerebral palsy                                |
| 17 | G80.4  | Ataxic cerebral palsy                                    |
| 18 | G80.8  | Other cerebral palsy                                     |
| 19 | G80.9  | Cerebral palsy, unspecified                              |
| 20 |        |                                                          |
| 21 |        |                                                          |
| 22 |        |                                                          |
| 23 |        |                                                          |
| 24 |        |                                                          |
| 25 |        |                                                          |
| 26 |        |                                                          |
| 27 |        |                                                          |
| 28 |        |                                                          |
| 29 |        |                                                          |
| 30 |        |                                                          |
| 31 |        |                                                          |
| 32 |        |                                                          |
| 33 |        |                                                          |
| 34 |        |                                                          |
| 35 |        |                                                          |
| 36 |        |                                                          |
| 37 |        |                                                          |
| 38 |        |                                                          |
| 39 |        |                                                          |
| 40 |        |                                                          |
| 41 |        |                                                          |
| 42 |        |                                                          |
| 43 |        |                                                          |
| 44 |        |                                                          |
| 45 |        |                                                          |
| 46 |        |                                                          |
| 47 |        |                                                          |
| 48 |        |                                                          |
| 49 |        |                                                          |
| 50 |        |                                                          |
| 51 |        |                                                          |
| 52 |        |                                                          |
| 53 |        |                                                          |
| 54 |        |                                                          |
| 55 |        |                                                          |
| 56 |        |                                                          |
| 57 |        |                                                          |
| 58 |        |                                                          |
| 59 |        |                                                          |
| 60 |        |                                                          |

1  
2  
3  
4  
5  
6  
7  
8  
9  
10  
11  
12  
13  
14  
15  
16  
17  
18  
19  
20  
21  
22  
23  
24  
25  
26  
27  
28  
29  
30  
31  
32  
33  
34  
35  
36  
37  
38  
39  
40  
41  
42  
43  
44  
45  
46  
47  
48  
49  
50  
51  
52  
53  
54  
55  
56  
57  
58  
59  
60

nt

For peer review only

1  
2 Medcodeid  
3 41677012  
4 91436017  
5 286325014  
6 292830017  
7 292837019  
8 356317017  
9 398809019  
10 482035011  
11 485624014  
12 1491626013  
13 223491000000112  
14 417461000006112  
15 460981000006112  
16 682621000006119  
17 2764761000006118  
18 2764791000006114  
19 2897121000006119  
20 3081891000006110  
21 3747591000006113  
22 5111171000006118  
23 5112151000006119  
24 6250371000006117  
25 12050681000006115  
26 12050691000006117  
27 292553010  
28 459292011  
29 1780311019  
30 72711000006117  
31 84291000006117  
32 84371000006110  
33 84421000006115  
34 84451000006112  
35 2967831017  
36 84411000006111  
37 913931000006116  
38 12332281000006119  
39 8022441000006118  
40 6961081000006118  
41 6970621000006114  
42 12331231000006110  
43 12363721000006110  
44 4757991000006116  
45 6050081000006114  
46 6980001000006117  
47 12704951000006115  
48 84361000006115  
49 913541000006118  
50 84321000006114  
51 913781000006117

For peer review only



1 84401000006113  
2 12331221000006112  
3 12332271000006117  
4 8027491000006113  
5 8024761000006118  
6 12085801000006113  
7 12345471000006114  
8 8022601000006118  
9 12370631000006117  
10 8025181000006114  
11 8040341000006111  
12 8037821000006110  
13 8022431000006111  
14 8022551000006115  
15 8032761000006111  
16 8050091000006115  
17 8022561000006118  
18 8006221000006115  
19 8037831000006113  
20 7969211000006115  
21 12102641000006114  
22 8022401000006115  
23 8027471000006112  
24 12363211000006112  
25 8032741000006112  
26 7287641000006112  
27 8024771000006113  
28 8019531000006110  
29 7696791000006110  
30 3526507010  
31 6967091000006111  
32 8034431000006118  
33 8043591000006119  
34 8027411000006115  
35 12370731000006114  
36 8026051000006110  
37 12370711000006115  
38 12370871000006115  
39 8026071000006117  
40 8034841000006114  
41 8120371000006113  
42 6971871000006117  
43 7098241000006117  
44 8027391000006115  
45 12085811000006111  
46 8232111000006119  
47 12370791000006113  
48 84731000006111  
49 913841000006116  
50 928501000006119

For peer review only

1 616621000006115  
2 913941000006114  
3 84721000006113  
4 913521000006113  
5 913661000006118  
6 84771000006114  
7 7098211000006116  
8 12370361000006118  
9 12363201000006114  
10 7966541000006112  
11 8026061000006112  
12 12085821000006115  
13 12370371000006113  
14 8019521000006112  
15 8027511000006119  
16 12704941000006117  
17 292541011  
18 12332751000006115  
19 12705071000006113  
20 12334621000006111  
21 3537388019  
22 12370281000006118  
23 7708091000006118  
24 7287611000006113  
25 913811000006115  
26 84341000006119  
27 457326014  
28 292540012  
29 7066041000006112  
30 12102631000006116  
31 8077141000006113  
32 12370721000006111  
33 928461000006119  
34 616611000006111  
35 8119341000006116  
36 12370891000006119  
37 8032751000006114  
38 12370801000006114  
39 8019541000006117  
40 8032731000006119  
41 6971901000006117  
42 12332761000006118  
43 12702371000006116  
44 84461000006114  
45 12345461000006119  
46 197984010  
47 3522045015  
48 12370621000006115  
49 7500221000006113  
50 7814941000006115

For peer review only

1  
2 4796311000006117  
3 12102661000006113  
4 8032781000006118  
5 8022541000006117  
6 8119331000006114  
7 12370611000006111  
8 7500251000006116  
9 938301000006114  
10 84441000006110  
11 84331000006112  
12 913481000006113  
13 5754581000006110  
14 12363671000006118  
15 84281000006115  
16 84301000006116  
17 84311000006118  
18 292548017  
19 12489581000006110  
20 7095251000006110  
21 429971019  
22 6969521000006113  
23 12370941000006118  
24 12370931000006111  
25 12370821000006116  
26 8022481000006112  
27 8022491000006110  
28 8027451000006119  
29 8043331000006112  
30 7969221000006111  
31 8043321000006114  
32 8032771000006116  
33 84431000006117  
34 913901000006112  
35 12370271000006116  
36 12363661000006113  
37 8022461000006119  
38 12705001000006119  
39 12702361000006111  
40 84391000006111  
41 12370811000006112  
42 8043601000006110  
43 8034441000006111  
44 12370881000006117  
45 7075891000006110  
46 12370901000006115  
47 12085831000006117  
48 8030331000006117  
49 913451000006117  
50 84351000006117  
51 84381000006113

For peer review only

1  
2 913511000006117  
3 12334611000006115  
4 1665751000000119  
5 459161015  
6 459296014  
7 8025171000006111  
8 12370741000006116  
9 8032081000006115  
10 928521000006112  
11 299601000000114  
12 616681000006116  
13 616591000006117  
14 616601000006113  
15 616641000006110  
16 616651000006112  
17 616671000006119  
18 292482014  
19 616661000006114  
20 459309011  
21 493773010  
22 1223148019  
23 459162010  
24 771381000006115  
25 771401000006115  
26 772141000006118  
27 913651000006115  
28 913831000006114  
29 913921000006119  
30 913981000006115  
31 6051171000006117  
32 280521000006117  
33 2949881000006116  
34 772181000006112  
35 913681000006111  
36 2949871000006119  
37 7587011000006110  
38 771331000006116  
39 771371000006118  
40 771411000006117  
41 772131000006111  
42 772151000006116  
43 787111000006112  
44 771421000006113  
45 73466011  
46 281181000006116  
47 2867421000006114  
48 772171000006114  
49 913711000006112  
50 913891000006113  
51 280541000006112

For peer review only

1  
2 281161000006114  
3 771341000006114  
4 772161000006119  
5 913531000006111  
6 280531000006119  
7  
8 2867431000006112  
9 11927551000006115  
10 459293018  
11 771361000006113  
12 913771000006115  
13 913801000006118  
14 280571000006116  
15 72651000006114  
16 280511000006113  
17 6050071000006111  
18 6050041000006115  
19 77727018  
20 771351000006111  
21 771391000006117  
22 913621000006112  
23 429972014  
24 292551012  
25 429970018  
26 457325013  
27 459294012  
28 292550013  
29 84681000006118  
30 84711000006117  
31 84821000006118  
32 913461000006115  
33 913851000006119  
34 928491000006110  
35 928511000006116  
36 928531000006110  
37 938311000006112  
38 6960431000006119  
39 6970631000006112  
40 6972441000006117  
41 6979991000006111  
42 6050061000006116  
43 6980431000006116  
44 84751000006116  
45 913671000006113  
46 913791000006119  
47 1667941000000112  
48 913491000006111  
49 8022411000006117  
50 8027421000006111  
51 7609891000006111  
52 12102651000006111

For peer review only

1  
2 12363221000006116  
3 12345481000006112  
4 6969531000006111  
5 7098221000006112  
6 84661000006111  
7  
8 7966551000006114  
9 12702381000006118  
10 8014491000006111  
11 928471000006114  
12  
13 84781000006112  
14 84801000006111  
15 2288011000000114  
16 6971881000006119  
17 7098231000006110  
18 913911000006110  
19  
20 292543014  
21 6951081000006112  
22 6954991000006112  
23 6961901000006111  
24 84741000006118  
25  
26 292538019  
27 12450761000006110  
28 8027461000006117  
29 7287621000006117  
30 6955501000006113  
31 6961091000006115  
32 84831000006115  
33 494564012  
34 459163017  
35  
36 8232101000006117  
37 8027481000006110  
38 6971891000006116  
39 11903141000006113  
40 5754621000006110  
41 6965561000006116  
42 913551000006116  
43 459295013  
44  
45 1658861000000113  
46 8030341000006110  
47 7609851000006117  
48 8027401000006118  
49 8027501000006117  
50 84811000006114  
51 84701000006115  
52 6962751000006117  
53 6986151000006117  
54 5754611000006119  
55 913821000006111  
56 72721000006113  
57 84651000006114  
58  
59  
60

For peer review only

1  
2 84671000006116  
3 84761000006119  
4 7287651000006114  
5 3253241000006117  
6 12336111000006119  
7  
8 8440231000006115  
9 7480691000006118  
10 7480711000006115  
11 9312981000006113  
12 6965571000006111  
13 8014501000006115  
14 12336121000006110  
15 7609881000006113  
16 84691000006115  
17 7609841000006119  
18 8022471000006114  
19 8440241000006113  
20 11927561000006118  
21 7783451000006114  
22 7708051000006112  
23 459169018  
24 7480681000006116  
25 7708121000006119  
26 3209431000006116  
27 7708071000006119  
28 84791000006110  
29 3253231000006110  
30 7480701000006118  
31 12344821000006114  
32 8084961000006111  
33 6961101000006114  
34 6951091000006110  
35 6971921000006110  
36 6971911000006119  
37 6960441000006112  
38 6972451000006115  
39 6980441000006114  
40 9312991000006111  
41 7066051000006114  
42 479511000000117  
43 7966931000006114  
44 7966941000006116  
45 12332111000006115  
46 12332101000006118  
47 881451000006113  
48 3209441000006114  
49 6979251000006110  
50 3209431000006116  
51 616481000006119  
52 616491000006116

For peer review only

1  
2 616501000006112  
3 616511000006110  
4 292483016  
5 616531000006116  
6 616541000006114  
7  
8 12718861000006118  
9 616551000006111  
10 616561000006113  
11 616571000006118  
12 616581000006115  
13  
14 5109461000006115  
15 479571000000110  
16 6959811000006110  
17 6977431000006113  
18 6969931000006116  
19 6982521000006119  
20 8084961000006111  
21 7966951000006119  
22 12702391000006115  
23 6959801000006112  
24 12704961000006118  
25 12762301000006111  
26 6983691000006114  
27 12704981000006111  
28 6982511000006110  
29 6982151000006118  
30 12336881000006117  
31 12336871000006115  
32 12705011000006116  
33 6977971000006119  
34 12335681000006111  
35 12335671000006113  
36 6975211000006112  
37 6975221000006116  
38 12363691000006117  
39 7708071000006119  
40 12705081000006111  
41 12363681000006115  
42 850691000006118  
43 1488898011  
44 1667891000000113  
45 7783451000006114  
46 11927561000006118  
47 1223148019  
48 840951000006119  
49 914391000006116  
50 841351000006110  
51 1223147012  
52 6977421000006110  
53 12704991000006114

For peer review only



1  
2 6951281000006117  
3 12702401000006118  
4 6954121000006112  
5 12331061000006114  
6 12331051000006112  
7 12704971000006113  
8 6969921000006119  
9 12334131000006118  
10 12334141000006111  
11 493773010  
12 674961000006118  
13 12485441000006119  
14 281161000006114  
15 281181000006116  
16 73466011  
17 280571000006116  
18 281171000006119  
19 459309011  
20 281211000006117  
21 280511000006113  
22 280521000006117  
23 280531000006119  
24 280541000006112  
25 280551000006114  
26 280561000006111  
27 280581000006118  
28 280591000006115  
29 587111000006111  
30 587521000006111  
31 641581000006115  
32 457328010  
33 6985001000006110  
34 6985011000006113  
35 6959091000006114  
36 6981621000006113  
37 12363731000006113  
38 7708121000006119  
39 4796321000006113  
40 1988741000006117  
41 11931861000006112  
42 5110001000006118  
43 12336541000006114  
44 12336531000006116  
45 84471000006119  
46 197761014  
47 84481000006116  
48 292590011  
49 2288071000000116  
50 7281511000006118  
51 84491000006118

For peer review only

1 459310018  
2 84501000006114  
3 914301000006111  
4 938321000006116  
5 84511000006112  
6 292583018  
7 299621000000117  
8 4758011000006112  
9 84521000006116  
10 459167016  
11 928581000006111  
12 928601000006118  
13 84531000006118  
14 914221000006113  
15 84541000006111  
16 292577016  
17 84551000006113  
18 914261000006119  
19 84561000006110  
20 914071000006115  
21 84571000006115  
22 459313016  
23 84581000006117  
24 914051000006113  
25 84591000006119  
26 459308015  
27 928561000006118  
28 928541000006117  
29 84601000006110  
30 914241000006118  
31 84611000006113  
32 914031000006118  
33 84621000006117  
34 914151000006112  
35 84631000006119  
36 292579018  
37 84641000006112  
38 457329019  
39 1665721000000112  
40 84841000006113  
41 493774016  
42 84851000006110  
43 292589019  
44 2288061000000111  
45 84861000006112  
46 459311019  
47 84871000006117  
48 914311000006114  
49 938331000006118  
50 12489851000006117

For peer review only

1  
2 84881000006119  
3 292582011  
4 1667921000000117  
5 84891000006116  
6 459169018  
7  
8 928591000006114  
9 928611000006115  
10 84901000006117  
11 914231000006111  
12 84911000006119  
13  
14 292576013  
15 84921000006110  
16 914271000006114  
17 84931000006113  
18 914081000006117  
19  
20 12702411000006115  
21 84941000006115  
22 459312014  
23 84951000006118  
24 914061000006110  
25 12702421000006111  
26 84961000006116  
27 459306016  
28 928571000006113  
29 928551000006115  
30 84971000006111  
31 914251000006116  
32 84981000006114  
33 914041000006111  
34 84991000006112  
35 914161000006114  
36 85001000006117  
37 292581016  
38 85011000006119  
39 457330012  
40 1658901000000118  
41 840971000006112  
42  
43  
44  
45  
46  
47  
48  
49  
50  
51  
52  
53  
54  
55  
56  
57  
58  
59  
60

For peer review only

1 Term  
2  
3 Addisonian crisis  
4 Adrenal medullary insufficiency  
5 Tuberculosis of adrenal glands - Addison's disease  
6 Drug-induced adrenocortical insufficiency  
7 Hypoadrenalism  
8 Adrenal insufficiency  
9 Corticoadrenal insufficiency NOS  
10 Acute adrenal insufficiency  
11 Addison's disease  
12 Corticoadrenal insufficiency  
13 Addison's anaemia  
14 Primary adrenocortical insufficiency  
15 Addisonian crisis  
16 Myopathy due to Addison's disease  
17 Hypocortisolism secondary to another disorder  
18 Secondary adrenal insufficiency  
19 Severe adrenal insufficiency  
20 Acute adrenal insufficiency with meningococcal septicaemia  
21 Addison's disease due to autoimmunity  
22 Secondary hypoadrenalism  
23 Iatrogenic adrenal insufficiency  
24 Addison disease  
25 Addisonian crisis  
26 Acute adrenocortical insufficiency  
27 Type 1 diabetes mellitus maturity onset  
28 Type 1 diabetes mellitus with arthropathy  
29 Type 1 diabetes mellitus with persistent microalbuminuria  
30 Unstable type 1 diabetes mellitus  
31 Type 1 diabetes mellitus - poor control  
32 Type 1 diabetes mellitus with nephropathy  
33 Type 1 diabetes mellitus with polyneuropathy  
34 Type 1 diabetes mellitus with ulcer  
35 Pre-existing type 1 diabetes mellitus in pregnancy  
36 Type 1 diabetes mellitus with peripheral angiopathy  
37 Type 1 diabetes mellitus with peripheral angiopathy  
38 Retinopathy co-occurrent and due to type 1 diabetes mellitus  
39 Neuropathic arthropathy due to type 1 diabetes mellitus  
40 Gangrene associated with type 1 diabetes mellitus  
41 Peripheral circulatory disorder associated with type 1 diabetes mellitus  
42 Exudative maculopathy co-occurrent and due to type 1 diabetes mellitus  
43 Polyneuropathy co-occurrent and due to type 1 diabetes mellitus  
44 Type 1 diabetes mellitus with hyperosmolar coma  
45 Type 1 diabetes mellitus with hypoglycemic coma  
46 Kidney disorder associated with type 1 diabetes mellitus  
47 Diabetic retinopathy associated with type 1 diabetes mellitus  
48 Type 1 diabetes mellitus with multiple complications  
49 Type 1 diabetes mellitus with multiple complications  
50 Type 1 diabetes mellitus with diabetic cataract  
51 Type 1 diabetes mellitus with mononeuropathy  
52  
53  
54  
55  
56  
57  
58  
59  
60

- 1
- 2 Type 1 diabetes mellitus with ophthalmic complications
- 3 Exudative maculopathy with type 1 diabetes mellitus
- 4 Retinopathy with type 1 diabetes mellitus
- 5 Chronic kidney disease stage 5 due to type 1 diabetes mellitus
- 6 Traction retinal detachment due to type 1 diabetes mellitus
- 7 Macular oedema due to type 1 diabetes mellitus
- 8 Lumbosacral radiculoplexus neuropathy co-occurrent and due to type 1 diabetes mellitus
- 9 Chronic ulcer of skin due to type 1 diabetes mellitus
- 10 Peripheral neuropathy with type 1 diabetes mellitus
- 11 Hypoglycemia due to type 1 diabetes mellitus
- 12 Hypertension concurrent and due to end stage renal disease on dialysis due to type 1 diabetes mellitus
- 13 Hypoglycaemic unawareness in type 1 diabetes mellitus
- 14 Nephrotic syndrome due to type 1 diabetes mellitus
- 15 Severe malnutrition due to type 1 diabetes mellitus
- 16 Vitreous haemorrhage due to type 1 diabetes mellitus
- 17 Foot ulcer due to type 1 diabetes mellitus
- 18 Osteomyelitis due to type 1 diabetes mellitus
- 19 Microalbuminuria due to type 1 diabetes mellitus
- 20 Hypoglycemic unawareness in type 1 diabetes mellitus
- 21 Mixed hyperlipidaemia due to type 1 diabetes mellitus
- 22 Cranial nerve palsy due to type 1 diabetes mellitus
- 23 Hypertension in chronic kidney disease due to type 1 diabetes mellitus
- 24 Chronic kidney disease stage 4 due to type 1 diabetes mellitus
- 25 Autonomic neuropathy co-occurrent and due to type 1 diabetes mellitus
- 26 Retinal ischemia due to type 1 diabetes mellitus
- 27 Type 1 diabetes mellitus well controlled
- 28 Rubeosis iridis due to type 1 diabetes mellitus
- 29 Proliferative retinopathy due to type 1 diabetes mellitus
- 30 Diabetic autonomic neuropathy due to type 1 diabetes mellitus
- 31 Disorder of nerve co-occurrent and due to type 1 diabetes mellitus
- 32 Diabetic oculopathy associated with type 1 diabetes mellitus
- 33 Retinal oedema due to type 1 diabetes mellitus
- 34 Mild nonproliferative retinopathy due to type 1 diabetes mellitus
- 35 Chronic kidney disease stage 2 due to type 1 diabetes mellitus
- 36 Rubeosis iridis with type 1 diabetes mellitus
- 37 Ankle ulcer due to type 1 diabetes mellitus
- 38 Traction retinal detachment with type 1 diabetes mellitus
- 39 Retinal oedema with type 1 diabetes mellitus
- 40 Forefoot ulcer due to type 1 diabetes mellitus
- 41 Ulcer of lower limb due to type 1 diabetes mellitus
- 42 Dyslipidemia due to type 1 diabetes mellitus
- 43 Hypoglycaemic coma in type 1 diabetes mellitus
- 44 Dietary advice for type 1 diabetes
- 45 Chronic kidney disease stage 1 due to type 1 diabetes mellitus
- 46 Macular edema due to type 1 diabetes mellitus
- 47 Referral to type 1 diabetes structured education programme
- 48 Retinal ischaemia with type 1 diabetes mellitus
- 49 Multiple complications of type 1 diabetes mellitus
- 50 Renal disorder associated with type 1 diabetes mellitus
- 51 Ketoacidosis in type 1 diabetes mellitus
- 52
- 53
- 54
- 55
- 56
- 57
- 58
- 59
- 60

1 Type 1 diabetes mellitus without complication  
2 Peripheral angiopathy due to type 1 diabetes mellitus  
3 Mononeuropathy with type 1 diabetes mellitus  
4 Neurological disorder with type 1 diabetes mellitus  
5 Retinopathy with type 1 diabetes mellitus  
6 Disorder of eye with type 1 diabetes mellitus  
7 Dietary education for type 1 diabetes mellitus  
8 Erectile dysfunction with type 1 diabetes mellitus  
9 Autonomic neuropathy with type 1 diabetes mellitus  
10 Diabetic erectile dysfunction associated with type 1 diabetes mellitus  
11 Heel AND/OR midfoot ulcer due to type 1 diabetes mellitus  
12 Macular edema co-occurrent and due to type 1 diabetes mellitus  
13 Erectile dysfunction co-occurrent and due to type 1 diabetes mellitus  
14 Nonproliferative diabetic retinopathy due to type 1 diabetes mellitus  
15 End stage renal disease on dialysis due to type 1 diabetes mellitus  
16 Neurological disorder associated with type 1 diabetes mellitus  
17 Type 1 diabetes mellitus with gangrene  
18 Mononeuropathy with type 1 diabetes mellitus  
19 Gastroparesis due to type 1 diabetes mellitus  
20 Neurological disorder co-occurrent and due to type 1 diabetes mellitus  
21 Diabetic oculopathy due to type 1 diabetes mellitus  
22 Disorder of eye co-occurrent and due to type 1 diabetes mellitus  
23 Polyneuropathy due to type 1 diabetes mellitus  
24 Type 1 diabetes mellitus uncontrolled  
25 Type 1 diabetes mellitus with polyneuropathy  
26 Type 1 diabetes mellitus with hypoglycaemic coma  
27 Type 1 diabetes mellitus without complication  
28 Type 1 diabetes mellitus with ulcer  
29 Small vessel disease due to type 1 diabetes mellitus  
30 Cranial nerve palsy with type 1 diabetes mellitus  
31 Proteinuria due to type 1 diabetes mellitus  
32 Traction retinal detachment co-occurrent and due to type 1 diabetes mellitus  
33 Persistent proteinuria associated with type 1 diabetes mellitus  
34 Disorder due to type 1 diabetes mellitus  
35 Hyperglycemia due to type 1 diabetes mellitus  
36 Retinal oedema co-occurrent and due to type 1 diabetes mellitus  
37 Diabetic vitreous haemorrhage due to type 1 diabetes mellitus  
38 Retinal ischemia with type 1 diabetes mellitus  
39 Blindness due to type 1 diabetes mellitus  
40 Retinal ischaemia due to type 1 diabetes mellitus  
41 Hypoglycemic coma in type 1 diabetes mellitus  
42 Mononeuropathy co-occurrent and due to type 1 diabetes mellitus  
43 Mononeuropathy associated with type 1 diabetes mellitus  
44 Type 1 diabetes mellitus without complication  
45 Lumbosacral radiculoplexus neuropathy with type 1 diabetes mellitus  
46 Type 1 diabetes mellitus  
47 Hyperosmolarity due to type 1 diabetes mellitus  
48 Blindness co-occurrent and due to type 1 diabetes mellitus  
49 Pre-existing type 1 diabetes mellitus in pregnancy  
50 Acidosis due to type 1 diabetes mellitus

- 1 Pre-existing type 1 diabetes mellitus
- 2
- 3 Cranial nerve palsy co-occurrent and due to type 1 diabetes mellitus
- 4 Diabetic vitreous hemorrhage due to type 1 diabetes mellitus
- 5 Diabetic dermopathy due to type 1 diabetes mellitus
- 6 Hyperglycaemia due to type 1 diabetes mellitus
- 7
- 8 Nonproliferative retinopathy co-occurrent and due to type 1 diabetes mellitus
- 9 Pregnancy and type 1 diabetes mellitus
- 10 Exudative maculopathy with type 1 diabetes mellitus
- 11 Type 1 diabetes mellitus with retinopathy
- 12 Type 1 diabetes mellitus with gangrene
- 13 Type 1 diabetes mellitus with ophthalmic complications
- 14
- 15 Brittle type 1 diabetes mellitus
- 16 Gastroparesis co-occurrent and due to type 1 diabetes mellitus
- 17 Type 1 diabetes mellitus
- 18 Type 1 diabetes mellitus maturity onset
- 19 Type 1 diabetes mellitus with arthropathy
- 20 Type 1 diabetes mellitus - poor control
- 21 Type 1 diabetes mellitus with gangrene
- 22 Hyperosmolality due to uncontrolled type 1 diabetes mellitus
- 23 Unstable type 1 diabetes mellitus
- 24
- 25 Persistent microalbuminuria associated with type 1 diabetes mellitus
- 26 Moderate nonproliferative retinopathy co-occurrent and due to type 1 diabetes mellitus
- 27 Mild nonproliferative retinopathy co-occurrent and due to type 1 diabetes mellitus
- 28 Retinal ischemia co-occurrent and due to type 1 diabetes mellitus
- 29 Peripheral neuropathy due to type 1 diabetes mellitus
- 30 Peripheral neuropathy co-occurrent and due to type 1 diabetes mellitus
- 31 Chronic kidney disease stage 3 due to type 1 diabetes mellitus
- 32 Hyperlipidemia due to type 1 diabetes mellitus
- 33 Mixed hyperlipidemia due to type 1 diabetes mellitus
- 34 Hyperlipidaemia due to type 1 diabetes mellitus
- 35 Vitreous hemorrhage due to type 1 diabetes mellitus
- 36 Type 1 diabetes mellitus with renal complications
- 37 Type 1 diabetes mellitus with diabetic cataract
- 38 Disorder of eye with type 1 diabetes mellitus
- 39 Gastroparesis with type 1 diabetes mellitus
- 40 Diabetic neuropathic arthropathy due to type 1 diabetes mellitus
- 41 Exudative maculopathy associated with type 1 diabetes mellitus
- 42 Diabetic cataract associated with type 1 diabetes mellitus
- 43 Type 1 diabetes mellitus with neuropathic arthropathy
- 44 Retinal ischaemia co-occurrent and due to type 1 diabetes mellitus
- 45 Moderate nonproliferative retinopathy due to type 1 diabetes mellitus
- 46 Retinal edema due to type 1 diabetes mellitus
- 47 Retinal edema with type 1 diabetes mellitus
- 48 Amyotrophy due to type 1 diabetes mellitus
- 49 Retinal edema co-occurrent and due to type 1 diabetes mellitus
- 50 Macular oedema co-occurrent and due to type 1 diabetes mellitus
- 51 Chronic kidney disease due to type 1 diabetes mellitus
- 52 Type 1 diabetes mellitus with renal complications
- 53 Type 1 diabetes mellitus with mononeuropathy
- 54 Type 1 diabetes mellitus with neurological complications
- 55
- 56
- 57
- 58
- 59
- 60

1 Type 1 diabetes mellitus with neurological complications  
2 Neurological disorder with type 1 diabetes mellitus  
3 Type 1 diabetic dietary review  
4 Type 1 diabetes mellitus with hypoglycaemic coma  
5 Type 1 diabetes mellitus with neuropathic arthropathy  
6 Hypoglycaemia due to type 1 diabetes mellitus  
7 Rubeosis iridis co-occurrent and due to type 1 diabetes mellitus  
8 Sensory neuropathy due to type 1 diabetes mellitus  
9 Ketoacidotic coma in type 1 diabetes mellitus  
10 Gastroparesis with type 1 diabetes mellitus  
11 Diabetes mellitus, juvenile, + other specified manifestation  
12 Diabetes mellitus, juvenile + peripheral circulatory disorder  
13 Diabetes mellitus, juvenile type, + ophthalmic manifestation  
14 Diabetes mellitus, juvenile type, with ketoacidosis  
15 Diabetes mellitus, juvenile type, with ketoacidotic coma  
16 Diabetes mellitus, juvenile, + neurological manifestation  
17 Diabetes mellitus, juvenile type, with hyperosmolar coma  
18 Diabetes mellitus, juvenile type, with renal manifestation  
19 Non-insulin dependent diabetes mellitus with arthropathy  
20 NIDDM - Non-insulin dependent diabetes mellitus  
21 Insulin treated non-insulin dependent diabetes mellitus  
22 Insulin dependent diabetes mellitus with hypoglycaemic coma  
23 Insulin dependent diabetes mellitus with multiple complicatn  
24 Insulin dependent diabetes mellitus with polyneuropathy  
25 Insulin dependent diab mell with peripheral angiopathy  
26 Insulin dependent diabetes mellitus with retinopathy  
27 Insulin dependent diabetes mellitus with nephropathy  
28 Insulin dependent diab mell with peripheral angiopathy  
29 Insulin dependent diab mell with neuropathic arthropathy  
30 Insulin dependent diabetes mellitus with arthropathy  
31 Non-insulin dependent diabetes mellitus with mononeuropathy  
32 Insulin dependent diabetes mellitus type 1B  
33 Insulin dependent diabetes mellitus - poor control  
34 Insulin dependent diabetes mellitus - poor control  
35 Insulin dependent diabetes mellitus type 1B  
36 Maternal history of non-insulin dependent diabetes mellitus  
37 Insulin dependent diabetes mellitus with arthropathy  
38 Insulin dependent diabetes mellitus with mononeuropathy  
39 Insulin dependent diabetes mellitus with retinopathy  
40 Insulin dependent diab mell with neuropathic arthropathy  
41 Insulin dependent diabetes maturity onset  
42 IDDM-Insulin dependent diabetes mellitus  
43 Insulin dependent diabetes mellitus with ulcer  
44 Non-insulin dependent diabetes mellitus  
45 Non-insulin dependent diabetes mellitus with neuropathic arthropathy  
46 Insulin dependent diabetes mellitus type 1A  
47 Insulin dependent diabetes mellitus  
48 Insulin dependent diabetes maturity onset  
49 Insulin dependent diabetes mellitus with diabetic cataract  
50 Non-insulin dependent diabetes mellitus with polyneuropathy



1 Non-insulin depend diabetes mellitus with diabetic cataract  
2 Insulin dependent diabetes mellitus with diabetic cataract  
3 Insulin dependent diabetes mellitus  
4 Insulin dependent diabetes mellitus with multiple complicat  
5 Non-insulin dependent diabetes mellitus with nephropathy  
6 Insulin dependent diabetes mellitus type IA  
7 Insulin dependent diabetes mellitus with ulcer  
8 Insulin dependent diabetes mellitus with arthropathy  
9 Insulin dependent diabetes mellitus with hypoglycaemic coma  
10 Insulin dependent diabetes mellitus with mononeuropathy  
11 Insulin dependent diabetes mellitus with polyneuropathy  
12 Non-insulin dependent diabetes mellitus  
13 Unstable insulin dependent diabetes mellitus  
14 Non-insulin dependent diabetes mellitus with hypoglyca coma  
15 Insulin dependent diabetes mellitus with hypoglycemic coma  
16 Insulin dependent diabetes mellitus with hypoglycaemic coma  
17 Insulin dependent diabetes mellitus  
18 Insulin dependent diabetes mellitus with gangrene  
19 Insulin dependent diabetes mellitus with nephropathy  
20 Insulin dependent diabetes mellitus with gangrene  
21 Unstable insulin dependent diabetes mellitus  
22 Type I diabetes mellitus maturity onset  
23 Unstable type I diabetes mellitus  
24 Type I diabetes mellitus without complication  
25 Type I diabetes mellitus with arthropathy  
26 Type I diabetes mellitus - poor control  
27 Type I diabetes mellitus with arthropathy  
28 Type I diabetes mellitus with hypoglycaemic coma  
29 Type I diabetes mellitus with ulcer  
30 Type I diabetes mellitus with renal complications  
31 Type I diabetes mellitus with nephropathy  
32 Type I diabetes mellitus with persistent microalbuminuria  
33 Type I diabetes mellitus with ketoacidosis  
34 Type I diabetes mellitus with ketoacidotic coma  
35 Type I diabetes mellitus with exudative maculopathy  
36 Diabetic retinopathy associated with type I diabetes mellitus  
37 Peripheral circulatory disorder associated with type I diabetes mellitus  
38 Neurological disorder associated with type I diabetes mellitus  
39 Renal disorder associated with type I diabetes mellitus  
40 Type I diabetes mellitus with hypoglycemic coma  
41 Diabetic cataract associated with type I diabetes mellitus  
42 Type I diabetes mellitus with neurological complications  
43 Type I diabetes mellitus with retinopathy  
44 Type I diabetes mellitus with mononeuropathy  
45 Type I diabetes mellitus with gastroparesis  
46 Type I diabetes mellitus with ophthalmic complications  
47 Hypertension in chronic kidney disease due to type I diabetes mellitus  
48 Chronic kidney disease stage 2 due to type I diabetes mellitus  
49 Retinopathy due to brittle type I diabetes mellitus  
50 Cranial nerve palsy with type I diabetes mellitus

1  
2 Autonomic neuropathy with type I diabetes mellitus  
3 Lumbosacral radiculoplexus neuropathy with type I diabetes mellitus  
4 Persistent microalbuminuria associated with type I diabetes mellitus  
5 Dietary education for type I diabetes mellitus  
6 Type I diabetes mellitus poorly controlled  
7 Erectile dysfunction associated with type I diabetes mellitus  
8 Diabetic oculopathy due to type I diabetes mellitus  
9 Peripheral vascular disease due to type I diabetes  
10 Type I diabetes mellitus with persistent proteinuria  
11 Type I diabetes mellitus with peripheral angiopathy  
12 Type I diabetes mellitus with renal complications  
13 Type I diabetes mellitus in remission  
14 Hypoglycemic coma in type I diabetes mellitus  
15 Dietary advice for type I diabetes  
16 Type I diabetes mellitus with diabetic cataract  
17 Type I diabetes mellitus with gangrene  
18 Ketoacidosis in type I diabetes mellitus  
19 Exudative maculopathy associated with type I diabetes mellitus  
20 Disorder associated with type I diabetes mellitus  
21 Type I diabetes mellitus with nephropathy  
22 Type I diabetes mellitus with ulcer  
23 Type I diabetes mellitus with gangrene  
24 Chronic kidney disease stage 3 due to type I diabetes mellitus  
25 Type I diabetes mellitus uncontrolled  
26 Persistent proteinuria associated with type I diabetes mellitus  
27 Gangrene associated with type I diabetes mellitus  
28 Type I diabetes mellitus without complication  
29 Type I diabetes mellitus  
30 Type I diabetes mellitus with hypoglycaemic coma  
31 Referral to type I diabetes structured education programme  
32 Chronic kidney disease stage 4 due to type I diabetes mellitus  
33 Hypoglycaemic coma in type I diabetes mellitus  
34 Diabetic oculopathy associated with type I diabetes mellitus  
35 Labile type I diabetes mellitus  
36 Ketoacidotic coma in type I diabetes mellitus  
37 Type I diabetes mellitus with multiple complications  
38 Type I diabetes mellitus with neuropathic arthropathy  
39 Type I diabetic dietary review  
40 Chronic kidney disease due to type I diabetes mellitus  
41 Neuropathy due to brittle type I diabetes mellitus  
42 Chronic kidney disease stage 1 due to type I diabetes mellitus  
43 Chronic kidney disease stage 5 due to type I diabetes mellitus  
44 Type I diabetes mellitus with retinopathy  
45 Type I diabetes mellitus with gangrene  
46 Mononeuropathy associated with type I diabetes mellitus  
47 Multiple complications of type I diabetes mellitus  
48 Brittle type I diabetes mellitus  
49 Type I diabetes mellitus with polyneuropathy  
50 Unstable type I diabetes mellitus  
51 Type I diabetes mellitus

1 Type I diabetes mellitus maturity onset  
2 Type I diabetes mellitus with neuropathic arthropathy  
3 Type I diabetes mellitus well controlled  
4 Diabetes mellitus type 1  
5 Cataract due to diabetes mellitus type 1  
6 Eating disorder co-occurrent with diabetes mellitus type 1  
7 H/O diabetes mellitus type 1  
8 History of diabetes mellitus type 1  
9 Skin ulcer of toe due to diabetes mellitus type 1  
10 Diabetes mellitus type 1 with ketoacidotic coma  
11 Diabetes mellitus type 1 without retinopathy  
12 Cataract co-occurrent and due to diabetes mellitus type 1  
13 Retinopathy due to unstable diabetes mellitus type 1  
14 Cataract due to diabetes mellitus type 1  
15 Neuropathy due to unstable diabetes mellitus type 1  
16 Diabetes mellitus type 1 with diabetic Charcot's arthropathy  
17 ED-DMT1 - Eating disorder-diabetes mellitus type 1  
18 Hypoglycemic coma co-occurrent and due to diabetes mellitus type II  
19 Hypoglycaemic coma co-occurrent and due to diabetes mellitus type II  
20 Gastroparesis due to diabetes mellitus type I  
21 Hypoglycaemic coma co-occurrent and due to diabetes mellitus type II  
22 History of diabetes mellitus type II  
23 Polyneuropathy due to diabetes mellitus type II  
24 Diabetes mellitus type II  
25 Gastroparesis due to diabetes mellitus type II  
26 Polyneuropathy due to diabetes mellitus type I  
27 Diabetes mellitus type I  
28 History of diabetes mellitus type I  
29 Diabetes type II with amyotrophy  
30 Diabetes type II review  
31 Diabetes type 1 with gangrene  
32 Diabetes type 1 with ketoacidosis  
33 Diabetes type 1 with hypoglycaemic coma  
34 Diabetes type 1 with hypoglycemic coma  
35 Diabetes type 1 with retinopathy  
36 Diabetes type 1 with neurological disorder  
37 Diabetes type 1 with cataract  
38 Diabetes type 1 with diabetic ulcer of toe, skin breakdown  
39 Diabetes type 1 with small vessel disease  
40 Diabetes type 1 review  
41 Angina associated with type 2 diabetes mellitus  
42 Angina associated with type II diabetes mellitus  
43 Cataract co-occurrent and due to diabetes mellitus type 2  
44 Cataract due to diabetes mellitus type 2  
45 Diabetes mellitus -adult onset  
46 Diabetes mellitus type 2  
47 Diabetes mellitus type 2 with ketoacidotic coma  
48 Diabetes mellitus type II  
49 Diabetes mellitus, adult onset, + neurological manifestation  
50 Diabetes mellitus, adult onset, + ophthalmic manifestation

1 Diabetes mellitus, adult onset, + unspecified complication  
2 Diabetes mellitus, adult onset, no mention of complication  
3 Diabetes mellitus, adult onset, with hyperosmolar coma  
4 Diabetes mellitus, adult onset, with ketoacidosis  
5 Diabetes mellitus, adult onset, with ketoacidotic coma  
6 Diabetes mellitus, adult onset, with no mention of complication  
7 Diabetes mellitus, adult onset, with renal manifestation  
8 Diabetes mellitus, adult with gangrene  
9 Diabetes mellitus, adult, + other specified manifestation  
10 Diabetes mellitus, adult, + peripheral circulatory disorder  
11 Diabetes type 2 on insulin  
12 Diabetes type 2 review  
13 Diabetes type 2 with cataract  
14 Diabetes type 2 with ketoacidosis  
15 Diabetes type 2 with neurological disorder  
16 Diabetes type 2 with retinopathy  
17 Diabetes type II review  
18 Diabetic angina pectoris associated with type 2 diabetes mellitus  
19 Diabetic cataract associated with type 2 diabetes mellitus  
20 Diabetic cataract associated with type II diabetes mellitus  
21 Diabetic oculopathy associated with type 2 diabetes mellitus  
22 Diabetic oculopathy associated with type 2 diabetes mellitus  
23 Diabetic oculopathy associated with type II diabetes mellitus  
24 Diabetic retinopathy associated with type 2 diabetes mellitus  
25 Diabetic retinopathy associated with type II diabetes mellitus  
26 Disorder due to type II diabetes mellitus  
27 Disorder of eye co-occurrent and due to type 2 diabetes mellitus  
28 Disorder of eye with type 2 diabetes mellitus  
29 Exudative maculopathy associated with type 2 diabetes mellitus  
30 Exudative maculopathy associated with type II diabetes mellitus  
31 Exudative maculopathy co-occurrent and due to type 2 diabetes mellitus  
32 Exudative maculopathy with type 2 diabetes mellitus  
33 Gangrene associated with type 2 diabetes mellitus  
34 Gangrene associated with type II diabetes mellitus  
35 Gastroparesis co-occurrent and due to type 2 diabetes mellitus  
36 Gastroparesis due to diabetes mellitus type II  
37 Gastroparesis due to type 2 diabetes mellitus  
38 Gastroparesis with type 2 diabetes mellitus  
39 Hyperosmolar non-ketotic state in type 2 diabetes mellitus  
40 Hyperosmolar non-ketotic state in type 2 diabetes mellitus  
41 Hyperosmolar non-ketotic state in type II diabetes mellitus  
42 Hypoglycaemic coma co-occurrent and due to diabetes mellitus type II  
43 Hypoglycemic coma co-occurrent and due to diabetes mellitus type II  
44 Insulin treated non-insulin dependent diabetes mellitus  
45 Insulin treated Type 2 diabetes mellitus  
46 Insulin treated Type 2 diabetes mellitus  
47 Insulin treated Type II diabetes mellitus  
48 Insulin treated Type II diabetes mellitus  
49 Ketoacidosis in type II diabetes mellitus  
50 Ketoacidotic coma in type 2 diabetes mellitus

1 Kidney disorder associated with type 2 diabetes mellitus  
2 Mononeuropathy associated with type 2 diabetes mellitus  
3 Mononeuropathy associated with type II diabetes mellitus  
4 Mononeuropathy co-occurrent and due to type 2 diabetes mellitus  
5 Mononeuropathy with type 2 diabetes mellitus  
6 Neurologic disorder associated with type 2 diabetes mellitus  
7 Neurologic disorder associated with type II diabetes mellitus  
8 Neurological disorder co-occurrent and due to type 2 diabetes mellitus  
9 Neurological disorder with diabetes type 2  
10 NIDDM - Non-insulin dependent diabetes mellitus  
11 NIDDM with peripheral circulatory disorder  
12 NIDDM with peripheral circulatory disorder  
13 Non-insulin depend diabetes mellitus with diabetic cataract  
14 Non-insulin dependent d m with neuropathic arthropathy  
15 Non-insulin dependent diabetes mellitus  
16 Non-insulin dependent diabetes mellitus  
17 Non-insulin dependent diabetes mellitus - poor control  
18 Non-insulin dependent diabetes mellitus with arthropathy  
19 Non-insulin dependent diabetes mellitus with gangrene  
20 Non-insulin dependent diabetes mellitus with hypoglyca coma  
21 Non-insulin dependent diabetes mellitus with mononeuropathy  
22 Non-insulin dependent diabetes mellitus with nephropathy  
23 Non-insulin dependent diabetes mellitus with polyneuropathy  
24 Non-insulin dependent diabetes mellitus with ulcer  
25 Non-insulin-dependent d m with peripheral angiopath  
26 Non-insulin-dependent diabetes mellitus with multiple comps  
27 Non-insulin-dependent diabetes mellitus with neuro comps  
28 Non-insulin-dependent diabetes mellitus with ophthalm comps  
29 Non-insulin-dependent diabetes mellitus with renal comps  
30 Non-insulin-dependent diabetes mellitus with retinopathy  
31 Non-insulin-dependent diabetes mellitus without complication  
32 Peripheral circulatory disorder associated with type 2 diabetes mellitus  
33 Peripheral circulatory disorder associated with type II diabetes mellitus  
34 Persistent microalbuminuria associated with type II diabetes mellitus  
35 Persistent proteinuria associated with type II diabetes mellitus  
36 Polyneuropathy co-occurrent and due to type 2 diabetes mellitus  
37 Polyneuropathy due to diabetes mellitus type II  
38 Pre-existing type 2 diabetes mellitus  
39 Pre-existing type 2 diabetes mellitus in pregnancy  
40 Pre-existing type 2 diabetes mellitus in pregnancy  
41 Pregnancy and type 2 diabetes mellitus  
42 Retinopathy co-occurrent and due to type 2 diabetes mellitus  
43 Retinopathy with type 2 diabetes mellitus  
44 Type 2 diabetes mellitus  
45 Type 2 diabetes mellitus  
46 Type 2 diabetes mellitus - poor control  
47 Type 2 diabetes mellitus - poor control  
48 Type 2 diabetes mellitus in remission  
49 Type 2 diabetes mellitus uncontrolled  
50 Type 2 diabetes mellitus with arthropathy

1 Type 2 diabetes mellitus with arthropathy  
2 Type 2 diabetes mellitus with diabetic cataract  
3 Type 2 diabetes mellitus with diabetic cataract  
4 Type 2 diabetes mellitus with exudative maculopathy  
5 Type 2 diabetes mellitus with gangrene  
6 Type 2 diabetes mellitus with gangrene  
7 Type 2 diabetes mellitus with gastroparesis  
8 Type 2 diabetes mellitus with hyperosmolar coma  
9 Type 2 diabetes mellitus with hypoglycaemic coma  
10 Type 2 diabetes mellitus with hypoglycaemic coma  
11 Type 2 diabetes mellitus with ketoacidosis  
12 Type 2 diabetes mellitus with ketoacidotic coma  
13 Type 2 diabetes mellitus with mononeuropathy  
14 Type 2 diabetes mellitus with mononeuropathy  
15 Type 2 diabetes mellitus with multiple complications  
16 Type 2 diabetes mellitus with multiple complications  
17 Type 2 diabetes mellitus with nephropathy  
18 Type 2 diabetes mellitus with nephropathy  
19 Type 2 diabetes mellitus with neurological complications  
20 Type 2 diabetes mellitus with neurological complications  
21 Type 2 diabetes mellitus with neuropathic arthropathy  
22 Type 2 diabetes mellitus with neuropathic arthropathy  
23 Type 2 diabetes mellitus with ophthalmic complications  
24 Type 2 diabetes mellitus with ophthalmic complications  
25 Type 2 diabetes mellitus with peripheral angiopathy  
26 Type 2 diabetes mellitus with peripheral angiopathy  
27 Type 2 diabetes mellitus with persistent microalbuminuria  
28 Type 2 diabetes mellitus with persistent proteinuria  
29 Type 2 diabetes mellitus with polyneuropathy  
30 Type 2 diabetes mellitus with polyneuropathy  
31 Type 2 diabetes mellitus with renal complications  
32 Type 2 diabetes mellitus with renal complications  
33 Type 2 diabetes mellitus with retinopathy  
34 Type 2 diabetes mellitus with retinopathy  
35 Type 2 diabetes mellitus with ulcer  
36 Type 2 diabetes mellitus with ulcer  
37 Type 2 diabetes mellitus without complication  
38 Type 2 diabetes mellitus without complication  
39 Type 2 diabetic dietary review  
40 Type II diabetes mellitus  
41 Type II diabetes mellitus  
42 Type II diabetes mellitus - poor control  
43 Type II diabetes mellitus - poor control  
44 Type II diabetes mellitus in remission  
45 Type II diabetes mellitus with arthropathy  
46 Type II diabetes mellitus with arthropathy  
47 Type II diabetes mellitus with diabetic cataract  
48 Type II diabetes mellitus with diabetic cataract  
49 Type II diabetes mellitus with exudative maculopathy  
50 Type II diabetes mellitus with exudative maculopathy

- 1
- 2 Type II diabetes mellitus with gangrene
- 3 Type II diabetes mellitus with gangrene
- 4 Type II diabetes mellitus with gastroparesis
- 5 Type II diabetes mellitus with hypoglycaemic coma
- 6 Type II diabetes mellitus with hypoglycaemic coma
- 7 Type II diabetes mellitus with ketoacidosis
- 8 Type II diabetes mellitus with ketoacidotic coma
- 9 Type II diabetes mellitus with mononeuropathy
- 10 Type II diabetes mellitus with mononeuropathy
- 11 Type II diabetes mellitus with multiple complications
- 12 Type II diabetes mellitus with multiple complications
- 13 Type II diabetes mellitus with nephropathy
- 14 Type II diabetes mellitus with nephropathy
- 15 Type II diabetes mellitus with neurological complications
- 16 Type II diabetes mellitus with neurological complications
- 17 Type II diabetes mellitus with neurological complications
- 18 Type II diabetes mellitus with neuropathic arthropathy
- 19 Type II diabetes mellitus with neuropathic arthropathy
- 20 Type II diabetes mellitus with ophthalmic complications
- 21 Type II diabetes mellitus with ophthalmic complications
- 22 Type II diabetes mellitus with ophthalmic complications
- 23 Type II diabetes mellitus with peripheral angiopathy
- 24 Type II diabetes mellitus with peripheral angiopathy
- 25 Type II diabetes mellitus with persistent microalbuminuria
- 26 Type II diabetes mellitus with persistent proteinuria
- 27 Type II diabetes mellitus with polyneuropathy
- 28 Type II diabetes mellitus with polyneuropathy
- 29 Type II diabetes mellitus with renal complications
- 30 Type II diabetes mellitus with renal complications
- 31 Type II diabetes mellitus with retinopathy
- 32 Type II diabetes mellitus with retinopathy
- 33 Type II diabetes mellitus with ulcer
- 34 Type II diabetes mellitus with ulcer
- 35 Type II diabetes mellitus without complication
- 36 Type II diabetes mellitus without complication
- 37 Type II diabetic dietary review
- 38 Diabetes mellitus autosomal dominant type 2
- 39
- 40
- 41
- 42
- 43
- 44
- 45
- 46
- 47
- 48
- 49
- 50
- 51
- 52
- 53
- 54
- 55
- 56
- 57
- 58
- 59
- 60



1  
2  
3  
4  
5  
6  
7  
8  
9  
10  
11  
12  
13  
14  
15  
16  
17  
18  
19  
20  
21  
22  
23  
24  
25  
26  
27  
28  
29  
30  
31  
32  
33  
34  
35  
36  
37  
38  
39  
40  
41  
42  
43  
44  
45  
46  
47  
48  
49  
50  
51  
52  
53  
54  
55  
56  
57  
58  
59  
60

For peer review only



1  
2  
3  
4  
5  
6  
7  
8  
9  
10  
11  
12  
13  
14  
15  
16  
17  
18  
19  
20  
21  
22  
23  
24  
25  
26  
27  
28  
29  
30  
31  
32  
33  
34  
35  
36  
37  
38  
39  
40  
41  
42  
43  
44  
45  
46  
47  
48  
49  
50  
51  
52  
53  
54  
55  
56  
57  
58  
59  
60

itus

For peer review only

|    |             |
|----|-------------|
| 1  |             |
| 2  | ICD-10 code |
| 3  | E27.1       |
| 4  | E27.2       |
| 5  | E27.3       |
| 6  | E27.4       |
| 7  | E10.1       |
| 8  | E10.2       |
| 9  | E10.3       |
| 10 | E10.4       |
| 11 | E10.5       |
| 12 | E10.6       |
| 13 | E10.7       |
| 14 | E10.8       |
| 15 | E10.9       |
| 16 | E11.1       |
| 17 | E11.2       |
| 18 | E11.3       |
| 19 | E11.4       |
| 20 | E11.5       |
| 21 | E11.6       |
| 22 | E11.7       |
| 23 | E11.8       |
| 24 | E11.9       |
| 25 | E12.1       |
| 26 | E12.2       |
| 27 | E12.3       |
| 28 | E12.4       |
| 29 | E12.5       |
| 30 | E12.6       |
| 31 | E12.7       |
| 32 | E12.8       |
| 33 | E12.9       |
| 34 | E13.1       |
| 35 | E13.2       |
| 36 | E13.3       |
| 37 | E13.4       |
| 38 | E13.5       |
| 39 | E13.6       |
| 40 | E13.7       |
| 41 | E13.8       |
| 42 | E13.9       |
| 43 | E14.1       |
| 44 | E14.2       |
| 45 | E14.3       |
| 46 | E14.4       |
| 47 | E14.5       |
| 48 | E14.6       |
| 49 | E14.7       |
| 50 | E14.8       |
| 51 | E14.9       |

For peer review only

|    |                                                                                                                  |
|----|------------------------------------------------------------------------------------------------------------------|
| 1  |                                                                                                                  |
| 2  | Term                                                                                                             |
| 3  | Primary adrenocortical insufficiency; Addison disease; Autoimmune adrenalitis                                    |
| 4  | Addisonian crisis; Adrenal crisis; Adrenocortical crisis                                                         |
| 5  | Drug-induced adrenocortical insufficiency                                                                        |
| 6  | Other and unspecified adrenocortical insufficiency; Adrenal haemorrhage/infarction; Adrenocortical insufficiency |
| 7  |                                                                                                                  |
| 8  | Type 1 diabetes mellitus with coma                                                                               |
| 9  | Type 1 diabetes mellitus with ketoacidosis                                                                       |
| 10 | Type 1 diabetes mellitus with renal complications                                                                |
| 11 | Type 1 diabetes mellitus with ophthalmic complications                                                           |
| 12 | Type 1 diabetes mellitus with neurological complications                                                         |
| 13 | Type 1 diabetes mellitus with peripheral circulatory complications                                               |
| 14 | Type 1 diabetes mellitus with other specific complications                                                       |
| 15 | Type 1 diabetes mellitus with multiple complications                                                             |
| 16 | Type 1 diabetes mellitus without complications                                                                   |
| 17 |                                                                                                                  |
| 18 | Type 2 diabetes mellitus with coma                                                                               |
| 19 | Type 2 diabetes mellitus with ketoacidosis                                                                       |
| 20 | Type 2 diabetes mellitus with renal complications                                                                |
| 21 | Type 2 diabetes mellitus with ophthalmic complications                                                           |
| 22 | Type 2 diabetes mellitus with neurological complications                                                         |
| 23 | Type 2 diabetes mellitus with peripheral circulatory complications                                               |
| 24 | Type 2 diabetes mellitus with other specific complications                                                       |
| 25 | Type 2 diabetes mellitus with multiple complications                                                             |
| 26 | Type 2 diabetes mellitus without complications                                                                   |
| 27 |                                                                                                                  |
| 28 | Malnutrition-related diabetes mellitus diabetes mellitus with coma                                               |
| 29 | Malnutrition-related diabetes mellitus diabetes mellitus with ketoacidosis                                       |
| 30 | Malnutrition-related diabetes mellitus diabetes mellitus with renal complications                                |
| 31 | Malnutrition-related diabetes mellitus diabetes mellitus with ophthalmic complications                           |
| 32 | Malnutrition-related diabetes mellitus diabetes mellitus with neurological complications                         |
| 33 | Malnutrition-related diabetes mellitus diabetes mellitus with peripheral circulatory complications               |
| 34 | Malnutrition-related diabetes mellitus diabetes mellitus with other specific complications                       |
| 35 | Malnutrition-related diabetes mellitus diabetes mellitus with multiple complications                             |
| 36 | Malnutrition-related diabetes mellitus diabetes mellitus without complications                                   |
| 37 |                                                                                                                  |
| 38 | Other specified diabetes mellitus diabetes mellitus with coma                                                    |
| 39 | Other specified diabetes mellitus diabetes mellitus with ketoacidosis                                            |
| 40 | Other specified diabetes mellitus diabetes mellitus with renal complications                                     |
| 41 | Other specified diabetes mellitus diabetes mellitus with ophthalmic complications                                |
| 42 | Other specified diabetes mellitus diabetes mellitus with neurological complications                              |
| 43 | Other specified diabetes mellitus diabetes mellitus with peripheral circulatory complications                    |
| 44 | Other specified diabetes mellitus diabetes mellitus with other specific complications                            |
| 45 | Other specified diabetes mellitus diabetes mellitus with multiple complications                                  |
| 46 | Other specified diabetes mellitus diabetes mellitus without complications                                        |
| 47 |                                                                                                                  |
| 48 | Unspecified diabetes mellitus diabetes mellitus with coma                                                        |
| 49 | Unspecified diabetes mellitus diabetes mellitus with ketoacidosis                                                |
| 50 | Unspecified diabetes mellitus diabetes mellitus with renal complications                                         |
| 51 | Unspecified diabetes mellitus diabetes mellitus with ophthalmic complications                                    |
| 52 | Unspecified diabetes mellitus diabetes mellitus with neurological complications                                  |
| 53 | Unspecified diabetes mellitus diabetes mellitus with peripheral circulatory complications                        |
| 54 | Unspecified diabetes mellitus diabetes mellitus with other specific complications                                |
| 55 | Unspecified diabetes mellitus diabetes mellitus with multiple complications                                      |
| 56 | Unspecified diabetes mellitus diabetes mellitus without complications                                            |
| 57 |                                                                                                                  |
| 58 |                                                                                                                  |
| 59 |                                                                                                                  |
| 60 |                                                                                                                  |

1  
2  
3  
4  
5  
6  
7  
8  
9  
10  
11  
12  
13  
14  
15  
16  
17  
18  
19  
20  
21  
22  
23  
24  
25  
26  
27  
28  
29  
30  
31  
32  
33  
34  
35  
36  
37  
38  
39  
40  
41  
42  
43  
44  
45  
46  
47  
48  
49  
50  
51  
52  
53  
54  
55  
56  
57  
58  
59  
60

phy

For peer review only

1  
2 Medcodeid  
3 2622348012  
4 496781000006111  
5 496791000006114  
6 1573641000006119  
7 1761401000006113  
8 1762141000006110  
9 1878421000006117  
10 1878451000006114  
11 287024011  
12 287025012  
13 288186011  
14 376571000006116  
15 825711000006111  
16 825861000006116  
17 1741791000006119  
18 389021000006114  
19 6981941000006110  
20 3904981000006111  
21 3994511000006112  
22 1816791000006117  
23 4596341000006119  
24 3289641000006110  
25 7625181000006111  
26 3951401000006118  
27 4278861000006110  
28 6861201000006112  
29 8023761000006116  
30 4090861000006111  
31 6436261000006116  
32 6602001000006116  
33 7501721000006114  
34 7671061000006119  
35 8223161000006113  
36 4090981000006113  
37 7960981000006112  
38 8024301000006115  
39 4279361000006113  
40 4280421000006113  
41 5588881000006111  
42 6054521000006111  
43 6857291000006118  
44 4091031000006116  
45 4256781000006114  
46 3541151018  
47 4091151000006110  
48 11917161000006117  
49 4279381000006115  
50 3527608016  
51 11917171000006112

For peer review only

1 6436301000006113  
2 3527604019  
3 4279111000006112  
4 4279881000006114  
5 4279131000006118  
6 4090841000006112  
7 6972261000006119  
8 4091111000006114  
9 4279701000006113  
10 7631531000006118  
11 8266821000006110  
12 3994531000006118  
13 6716441000006116  
14 6716431000006114  
15 8022741000006110  
16 6436361000006114  
17 7671111000006118  
18 8694421000006118  
19 4091001000006112  
20 3344261000006112  
21 6052951000006116  
22 3533581011  
23 3916471000006110  
24 8266351000006111  
25 3916491000006111  
26 4090921000006114  
27 6436331000006117  
28 6972271000006114  
29 5009911000006118  
30 3533586018  
31 8694341000006117  
32 4279071000006116  
33 4090891000006115  
34 4091011000006110  
35 3527598017  
36 5143461000006113  
37 9325011000006117  
38 4279901000006111  
39 4279861000006116  
40 8022751000006112  
41 4327461000006117  
42 7671051000006116  
43 1814931000006110  
44 8265311000006115  
45 7522091000006110  
46 11989691000006113  
47 825841000006115  
48 825791000006118  
49 389101000006117  
50 1761381000006113

For peer review only

1  
2 458431000033114  
3 8023751000006118  
4 5084731000006113  
5 4091121000006118  
6 4090791000006114  
7 3541148013  
8 4090911000006118  
9 7791061000006117  
10 317670010  
11 4091081000006115  
12 4279031000006119  
13 5650951000006113  
14 7796951000006110  
15 5009921000006114  
16 7796961000006112  
17 4280491000006110  
18 7326211000006113  
19 4279321000006119  
20 4091041000006114  
21 8694361000006118  
22 6972251000006116  
23 4297871000006114  
24 7961001000006111  
25 8105711000006115  
26 6607631000006119  
27 6671541000006112  
28 6723191000006119  
29 3541143016  
30 6436351000006112  
31 287032015  
32 8342711000006110  
33 3904971000006113  
34 287031010  
35 389111000006119  
36 288174013  
37 1977041000006112  
38 1878431000006119  
39 1878441000006112  
40 1761311000006118  
41 1762131000006117  
42 1762151000006112  
43 825881000006114  
44 825891000006112  
45 4090811000006113  
46 5004491000006116  
47 3082081000006114  
48 4085611000006119  
49 4279211000006118  
50 4091091000006117  
51 6054511000006115  
52  
53  
54  
55  
56  
57  
58  
59  
60

For peer review only

1  
2 5650961000006110  
3 4091171000006117  
4 4327411000006115  
5 4279151000006113  
6 8338681000006110  
7  
8 4297881000006112  
9 3785181000006115  
10 389001000006116  
11 2376041000000113  
12  
13 365853018  
14 459601018  
15 4256461000006111  
16 6436271000006111  
17 7671071000006114  
18  
19 3533587010  
20 4742831000006112  
21 8190391000006119  
22 4085591000006113  
23 1814921000006112  
24  
25 288177018  
26 288182013  
27 1761351000006117  
28 4279921000006118  
29 906841000006112  
30 854381000006118  
31 6436281000006114  
32 4280411000006117  
33 6436371000006119  
34 6857301000006117  
35 6671551000006114  
36 8265981000006111  
37 6436291000006112  
38 2802031000006116  
39 4090881000006118  
40 4279741000006110  
41 4256481000006118  
42 4279721000006115  
43 7671121000006114  
44 6723201000006116  
45 4091131000006115  
46 2802051000006111  
47 8024291000006116  
48 7266641000006112  
49 6436241000006115  
50 5084691000006117  
51 7333141000006111  
52 4090781000006111  
53 4279841000006115  
54 4279821000006110  
55 2963081000006116  
56  
57  
58  
59  
60

For peer review only



1  
2 4280431000006111  
3 3533591017  
4 7796921000006118  
5 1815001000006119  
6 287027016  
7  
8 825731000006117  
9 388991000006116  
10 288178011  
11 288190013  
12  
13 288191012  
14 1761361000006115  
15 908851000006113  
16 257855012  
17 4279291000006111  
18 6280601000006113  
19  
20 7671101000006116  
21 3289651000006112  
22 4091051000006111  
23 5004511000006110  
24 4298901000006113  
25  
26 389011000006118  
27 4090971000006110  
28 4090941000006119  
29 3541141019  
30  
31 4090951000006117  
32 4279781000006116  
33 9186431000006114  
34 6861211000006110  
35 5084711000006119  
36 3082071000006111  
37  
38 4278881000006117  
39 3527596018  
40 4279171000006115  
41 4090831000006119  
42 12626771000006119  
43  
44 4091071000006118  
45 6052971000006114  
46 3528269015  
47 4279801000006117  
48 8694391000006114  
49  
50 4091161000006112  
51 4278971000006114  
52 1814951000006115  
53 2168331000000117  
54 2229631000000112  
55  
56 12031271000006114  
57 1074341000006113  
58 4279341000006114  
59 5009891000006115  
60 11777201000006114

For peer review only

1 7796991000006116  
2 459603015  
3 129081000000115  
4 152322017  
5 829181000006115  
6 7711131000006114  
7 6981961000006114  
8 3515791000006119  
9 4596351000006117  
10 3527607014  
11 3527597010  
12 7705061000006116  
13 7701991000006114  
14 3344251000006110  
15 4090871000006116  
16 4279751000006112  
17 7702801000006118  
18 7708531000006113  
19 4279911000006114  
20 7706051000006111  
21 7708771000006117  
22 7704681000006118  
23 8265821000006115  
24 7702661000006118  
25 7705031000006113  
26 3528268011  
27 2802021000006119  
28 7706061000006113  
29 4278851000006113  
30 7702701000006114  
31 7705441000006114  
32 7704671000006116  
33 7704731000006111  
34 7708731000006115  
35 7960991000006110  
36 7296281000006118  
37 4298821000006112  
38 3533582016  
39 4278961000006119  
40 6671571000006116  
41 7658881000006114  
42 8339341000006117  
43 7333161000006110  
44 7702401000006116  
45 7796971000006117  
46 7960971000006114  
47 7705211000006114  
48 7708371000006116  
49 7713771000006114  
50 7326221000006117

For peer review only

1  
2 3533585019  
3 4279351000006111  
4 4279891000006112  
5 4279121000006116  
6 6671561000006111  
7  
8 7298661000006113  
9 7705431000006116  
10 7658801000006117  
11 7701961000006118  
12  
13 7833241000006116  
14 4091141000006113  
15 7705291000006116  
16 6273011000006115  
17 7702101000006110  
18  
19 8024311000006117  
20 6857331000006113  
21 6601991000006118  
22 4279731000006117  
23 7326231000006119  
24  
25 7704641000006112  
26 7704191000006114  
27 7658891000006112  
28 7705461000006113  
29 4280481000006112  
30 7294881000006114  
31 7704631000006119  
32  
33 3541159016  
34 4279281000006113  
35 5004501000006112  
36 7705271000006117  
37 6436341000006110  
38 7658911000006114  
39 7702471000006110  
40 7705451000006111  
41  
42 3527593014  
43  
44 3785171000006118  
45 6861251000006111  
46 7631511000006112  
47 7671131000006112  
48  
49 7796931000006115  
50 4279831000006113  
51 5073771000006119  
52 3156721000006114  
53 4256451000006114  
54 7702671000006113  
55 8298021000006115  
56 8334851000006112  
57 3994521000006116  
58 5419561000006118  
59  
60 7708591000006112

For peer review only

1 7708581000006114  
2 7708301000006110  
3 3916501000006115  
4 4279791000006118  
5 6272981000006117  
6 7625191000006114  
7 7658791000006118  
8 7671081000006112  
9 4256471000006116  
10 4278871000006115  
11 7707951000006114  
12 7710861000006118  
13 7705281000006119  
14 4090801000006110  
15 4279691000006113  
16 5084741000006115  
17 5650971000006115  
18 264371011  
19 825721000006115  
20 829221000006112  
21 1907831000006117  
22 1907861000006114  
23 4279161000006110  
24 5009881000006118  
25 4332401000006117  
26 7708721000006118  
27 7704691000006115  
28 7705421000006119  
29 7708601000006116  
30 7704721000006113  
31 7708491000006113  
32 7266651000006114  
33 7702111000006113  
34 4279331000006116  
35 7702681000006111  
36 6272961000006110  
37 6054531000006114  
38 4279371000006118  
39 7705301000006115  
40 4279851000006118  
41 4279021000006117  
42 7698531000006117  
43 7702791000006119  
44 7705201000006111  
45 7713781000006112  
46 7787821000006113  
47 5588871000006113  
48 4742841000006119  
49 287020019  
50 287021015

For peer review only

1  
2 2302501000000114  
3 4090931000006112  
4 4280401000006115  
5 5004481000006119  
6 6592361000006110  
7 6857341000006115  
8 7704931000006113  
9 7796981000006119  
10 4091061000006113  
11 4279871000006111  
12 6716421000006111  
13 7787831000006111  
14 7712061000006114  
15 7708291000006114  
16 7791051000006119  
17 7705261000006112  
18 4279201000006116  
19 7658831000006113  
20 4280441000006118  
21 3515863011  
22 6436381000006116  
23 7702381000006116  
24 4279061000006111  
25 7712021000006115  
26 7707941000006112  
27 7702691000006114  
28 4091181000006119  
29 3541157019  
30 3533589013  
31 4332361000006110  
32 7708511000006119  
33 7705001000006117  
34 7708381000006118  
35 7710981000006116  
36 7701771000006111  
37 5084721000006110  
38 6052981000006112  
39 6716411000006115  
40 7719941000006118  
41 5009901000006116  
42 5084681000006115  
43 7702121000006117  
44 7708561000006116  
45 4332411000006119  
46 4742821000006114  
47 1878411000006113  
48 1121631000000110  
49 603931000000114  
50 7501731000006112  
51 143288017

For peer review only

1 765886100006116  
2 770209100006116  
3 770495100006118  
4 822315100006111  
5 932500100006115  
6 643625100006118  
7 3514144017  
8 728950100006117  
9 802273100006117  
10 643631100006111  
11 729448100006112  
12 508470100006117  
13 715541100006113  
14 751159100006117  
15 409085100006114  
16 433238100006117  
17 686124100006114  
18 770496100006116  
19 765885100006118  
20 770242100006114  
21 730854100006116  
22 771088100006111  
23 287029018  
24 82587100006111  
25 627300100006118  
26 409099100006111  
27 728680100006113  
28 770504100006115  
29 771039100006119  
30 729484100006115  
31 765884100006115  
32 427977100006119  
33 769852100006115  
34 765881100006119  
35 672318100006117  
36 826597100006113  
37 770517100006112  
38 408560100006117  
39 287014015  
40 783327100006112  
41 765882100006110  
42 765894100006113  
43 287022010  
44 288185010  
45 1245674100006113  
46 420080100006118  
47 409090100006116  
48 288173019  
49 770486100006112  
50 192421100006112

For peer review only

1  
2 7294691000006113  
3 7631521000006116  
4 6280611000006111  
5 7260251000006113  
6 7704941000006115  
7  
8 4091101000006111  
9 7704181000006111  
10 7702131000006119  
11 7705051000006118  
12 8105701000006118  
13 4327441000006116  
14 7658871000006111  
15 3951391000006115  
16 7294851000006118  
17 3010191000006111  
18 4279711000006111  
19 4279141000006111  
20 7328811000006111  
21 7708571000006111  
22 8266811000006119  
23 7704711000006117  
24 4279101000006114  
25 11887321000006116  
26 7333151000006113  
27 7702651000006115  
28 7702371000006119  
29 3541154014  
30 7813131000006113  
31 7710381000006117  
32 4279311000006110  
33 7708501000006117  
34 7658921000006118  
35 3527603013  
36 4256771000006111  
37 4327391000006115  
38 5143451000006111  
39 3289661000006114  
40 4332371000006115  
41 7702141000006112  
42 7704991000006112  
43 4200811000006115  
44 4327451000006119  
45 3951411000006115  
46 3541153015  
47 7708541000006115  
48 8266341000006114  
49 1907841000006110  
50 4297891000006110  
51 7294491000006110  
52 3082061000006116  
53  
54  
55  
56  
57  
58  
59  
60

For peer review only

1 7307131000006118  
2 7710871000006113  
3 7713761000006119  
4 7708761000006112  
5 7704971000006111  
6 5009931000006112  
7 7625201000006112  
8 7658931000006115  
9 7704701000006115  
10 7484811000006117  
11 7667371000006110  
12 4332391000006119  
13 4090961000006115  
14 4063961000006110  
15 11989701000006113  
16 7294871000006111  
17 7704981000006114  
18 7708311000006113  
19 1121571000000111  
20 287012016  
21 7658901000006111  
22 3533590016  
23 7708521000006110  
24 4091021000006119  
25 5084751000006118  
26 12031261000006119  
27 7796941000006113  
28 4090821000006117  
29 4279811000006119  
30 7704201000006112  
31 7708551000006118  
32 1715721000006111  
33 1812841000006118  
34 1907851000006112  
35 337231000006117  
36 264371011  
37 264418012  
38 3515761000006110  
39 3515801000006118  
40 3515811000006115  
41 474391000006110  
42 474401000006112  
43 6955711000006116  
44 6960951000006115  
45 6973421000006116  
46 6973441000006111  
47 6975941000006117  
48 6981921000006115  
49 825881000006114  
50 825891000006112

For peer review only



1  
2 879271000006114  
3 906841000006112  
4 908851000006113  
5 925451000006113  
6 925771000006110  
7  
8 103777013  
9 117168016  
10 270232016  
11 270616014  
12 272325018  
13 272389014  
14 324973015  
15 324974014  
16 324975010  
17 348547019  
18 348550016  
19 354610013  
20 354613010  
21 354616019  
22 354621016  
23 354628010  
24 413415016  
25 474471011  
26 855601000006117  
27 864761000006115  
28 988961000006115  
29 1711491000006119  
30 1711511000006113  
31 2189151000000117  
32 2191221000000118  
33 2197961000000113  
34 1620531000006113  
35 270768010  
36 270777015  
37 272326017  
38 272327014  
39 31211000006119  
40 177251000006119  
41 225661000006111  
42 380061000000118  
43 478131000006115  
44 1905531000006112  
45 859491000006112  
46 900121000006113  
47 1227663018  
48 3527364013  
49 3647071000006110  
50 5039311000006114  
51 5096171000006118  
52 4542501000006119

For peer review only

1 3532180010  
2  
3 4663311000006116  
4 2786011000006112  
5 5340221000006117  
6 4669451000006113  
7 3647061000006115  
8 12458801000006116  
9 4542461000006119  
10 4542691000006113  
11 3022121000006117  
12 7688001000006116  
13 4668981000006117  
14 2786021000006116  
15 3647051000006117  
16 4663811000006112  
17 3930661000006110  
18 4410641000006115  
19 4668961000006110  
20 7104131000006119  
21 5039331000006115  
22 2786001000006114  
23 4661791000006112  
24 4663791000006113  
25 864951000006119  
26 2560511000006119  
27 3786771000006114  
28 7237331000006116  
29 7237321000006119  
30 7316561000006118  
31 2618391000006114  
32 9935651000006116  
33 7279701000006119  
34 3346301000006113  
35 6948351000006111  
36 7838631000006116  
37 8030371000006119  
38 8453111000006110  
39 11910651000006112  
40 3653831000006114  
41 5161091000006119  
42 5096231000006110  
43 7237731000006117  
44 7139341000006119  
45 7254711000006117  
46 7985891000006113  
47 2666681000006118  
48 5087211000006119  
49 7791461000006114  
50 5057551000006110  
51 7351231000006114  
52  
53  
54  
55  
56  
57  
58  
59  
60

For peer review only

1  
2 2641011000006119  
3 2641021000006110  
4 7766401000006118  
5 5039351000006110  
6 6018741000006111  
7  
8 7385581000006116  
9 3636952011  
10 7710041000006114  
11 7475631000006115  
12  
13 7986241000006112  
14 7150611000006118  
15 7566431000006113  
16 8335521000006117  
17 7791471000006119  
18 8453081000006116  
19  
20 7100591000006115  
21 7710031000006116  
22 5039341000006113  
23 5157601000006116  
24  
25 3534658012  
26 5039371000006117  
27 7170221000006110  
28 7838621000006119  
29 7566411000006119  
30 8115451000006112  
31 2868911000006114  
32 3598901000006118  
33 3786781000006112  
34 5959291000006115  
35 7383621000006115  
36 6932441000006115  
37 7507901000006114  
38 8268201000006117  
39 3527360016  
40 3033691000006115  
41 3670311000006119  
42 3915911000006117  
43 5096031000006117  
44 7785581000006115  
45 7507891000006110  
46 7838611000006110  
47 7566391000006119  
48 2949531000006115  
49 6948341000006114  
50 7189591000006110  
51 8325471000006118  
52 12458821000006114  
53 8117811000006119  
54 8348931000006116  
55 2447021000000110  
56  
57  
58  
59  
60

For peer review only

1 5087221000006110  
2 5057581000006119  
3 5096241000006117  
4 7103511000006119  
5 7184551000006117  
6 2660021000006113  
7 5039361000006112  
8 5096051000006112  
9 3527362012  
10 8453711000006114  
11 12019461000006111  
12 7133421000006117  
13 3534651018  
14 4218231000006113  
15 4745181000006113  
16 5057571000006117  
17 7150631000006112  
18 7791441000006110  
19 8293001000006116  
20 7080931000006116  
21 7148541000006115  
22 2666671000006116  
23 3653841000006116  
24 90511000006115  
25 1549841000006116  
26 460649019  
27 461518012  
28 7986201000006110  
29 7752391000006113  
30 4323211000006112  
31 8325851000006114  
32 4319871000006111  
33 8325771000006113  
34 2868901000006111  
35 5161121000006115  
36 2660011000006117  
37 12031651000006118  
38 8284621000006118  
39 3825411000006114  
40 7475621000006118  
41 8450901000006118  
42 6718281000006112  
43 3973131000006117  
44 4779991000006112  
45 7714921000006112  
46 7181301000006112  
47 5057561000006112  
48 5161131000006117  
49 3825401000006111  
50 5980831000006116

For peer review only

1  
2 7385571000006119  
3 7298951000006115  
4 8313221000006113  
5 8325881000006118  
6 3455171000006118  
7  
8 460955014  
9 4663831000006118  
10 4661761000006116  
11 7688541000006114  
12 460645013  
13  
14 754061000006111  
15 460643018  
16 1227661016  
17 384481000006118  
18 42151000006116  
19  
20 270234015  
21 270618010  
22 1713291000006119  
23 1713331000006114  
24  
25 2676200013  
26 354623018  
27 354627017  
28 422992018  
29 324971018  
30  
31 270615013  
32 501594013  
33 7150641000006119  
34 8321131000006112  
35 7767241000006119  
36 7786611000006116  
37  
38 5161291000006110  
39 5059341000006114  
40 7167121000006113  
41 7212371000006110  
42 7167141000006118  
43 7190521000006119  
44 7688081000006113  
45 5056471000006118  
46 11910741000006116  
47  
48 380101000000116  
49 822591000006117  
50 6932431000006113  
51 8321141000006119  
52 7613121000006116  
53 12019471000006116  
54 6024591000006114  
55 5094171000006114  
56 7150621000006114  
57 8327141000006110  
58 7351241000006116  
59  
60

For peer review only

1  
2 5340201000006110  
3 3534653015  
4 933321000006111  
5 5096191000006117  
6 4410651000006118  
7 4663841000006111  
8 3023061000006115  
9 3023081000006113  
10 5486891000006118  
11 460650019  
12 42161000006119  
13 268099017  
14 268100013  
15 270767017  
16 2209021000000112  
17 2234621000000111  
18 7766381000006118  
19 354612017  
20 270621012  
21 30458014  
22 2160027017  
23 403103015  
24 7484221000006112  
25 3973121000006115  
26 5161281000006112  
27 7150601000006116  
28 4319661000006117  
29 6585661000006112  
30 7767231000006112  
31 362091000000110  
32 460651015  
33 3636384014  
34 2890701000006112  
35 8325791000006114  
36 6933861000006111  
37 4319821000006110  
38 6316361000006112  
39 7167181000006112  
40 5053751000006110  
41 7566421000006110  
42 7767221000006114  
43 7565141000006116  
44 8348921000006119  
45 7167131000006111  
46 7569841000006114  
47 7238481000006111  
48 7710051000006111  
49 5599451000006111  
50 7385561000006114  
51 4661751000006118  
52  
53  
54  
55  
56  
57  
58  
59  
60

For peer review only

1  
2 4668951000006113  
3 4669011000006116  
4 7080381000006116  
5 6933851000006114  
6 4668971000006115  
7  
8 3485411000006113  
9 3022131000006119  
10 424791000006110  
11 500371000006119  
12 500401000006116  
13 1550021000006110  
14 324977019  
15 55971000006117  
16 90461000006118  
17 270233014  
18 2209101000000119  
19 2234541000000115  
20 906351000006116  
21 272320011  
22 354617011  
23 8335251000006112  
24 2560521000006110  
25 5096271000006113  
26 7168651000006111  
27 7171231000006119  
28 8284921000006111  
29 7279711000006116  
30 7985971000006118  
31 5647621000006110  
32 177341000006111  
33 7791451000006112  
34 8115511000006112  
35 8325761000006118  
36 8325871000006116  
37 5096281000006111  
38 3455181000006115  
39 8325481000006115  
40 8451601000006117  
41 5538541000006110  
42 12458511000006115  
43 5647611000006119  
44 7254721000006113  
45 460644012  
46 4323341000006116  
47 90471000006113  
48 372621000000114  
49 7496071000006114  
50 7139351000006117  
51 7214301000006113  
52 12719481000006116  
53  
54  
55  
56  
57  
58  
59  
60

For peer review only

1 4542701000006113  
2 3647031000006112  
3 5043991000006117  
4 4663821000006116  
5 5043981000006115  
6 4669051000006115  
7 8258171000006110  
8 3022141000006112  
9 7688041000006119  
10 3022111000006113  
11 7091541000006113  
12 478111000006114  
13 818821000006110  
14 376141000000113  
15 90421000006112  
16 2198001000000111  
17 2198141000000110  
18 1800881000000119  
19 1709421000006118  
20 864281000006116  
21 225671000006116  
22 2160021016  
23 73655011  
24 270612011  
25 270614012  
26 270766014  
27 324970017  
28 324976011  
29 353974015  
30 354624012  
31 354631011  
32 3790671000006119  
33 2626431000006112  
34 7090481000006112  
35 12031641000006115  
36 5980821000006119  
37 7132471000006114  
38 7766371000006116  
39 11909781000006115  
40 11913051000006114  
41 2937111000006111  
42 3915921000006113  
43 7238471000006113  
44 8090361000006115  
45 5593651000006110  
46 3516351000006115  
47 7791431000006117  
48 8325861000006111  
49 3737491000006113  
50 8325781000006111  
51  
52  
53  
54  
55  
56  
57  
58  
59  
60

For peer review only



1 7209391000006119  
2 3534659016  
3 2743241000000110  
4 8325891000006115  
5 5161081000006117  
6 3260851000006117  
7 11913041000006112  
8 8335261000006114  
9 7133411000006113  
10 7348311000006117  
11 7766391000006115  
12 7080921000006119  
13 5044001000006114  
14 5157591000006112  
15 7569831000006116  
16 7932051000006112  
17 3292751000006114  
18 12719251000006111  
19 90611000006119  
20 399381000000115  
21 3022151000006114  
22 3515071000006117  
23 4663371000006113  
24 3647021000006114  
25 8325571000006119  
26 3023071000006110  
27 3532181014  
28 5096211000006116  
29 4661781000006114  
30 7104121000006117  
31 739931000006118  
32 270617017  
33 270770018  
34 270776012  
35 270778013  
36 1834341000006111  
37 861571000006118  
38 366671000000118  
39 282927013  
40 354615015  
41 354618018  
42 354619014  
43 7212381000006113  
44 8293011000006118  
45 8321121000006114  
46 7986531000006116  
47 5087201000006117  
48 270769019  
49 4542541000006117  
50 251924010

For peer review only

1  
2 4542681000006110  
3 251930010  
4 251923016  
5 4542521000006112  
6 251929017  
7  
8 4542661000006117  
9 2674490015  
10 2674491016  
11 8047851000006119  
12 8294221000006119  
13 5611161000006112  
14 5063131000006112  
15 5063121000006114  
16 361931000000119  
17 491071000000110  
18 7504171000006112  
19 6240891000006113  
20 8087441000006110  
21 7644221000006118  
22 7644211000006114  
23 3448711000006119  
24 7265981000006117  
25 5063031000006111  
26 5063081000006112  
27 5063041000006118  
28 5065771000006112  
29 2878601000006113  
30 3454841000006117  
31 5065791000006113  
32 5065801000006114  
33 5063101000006116  
34 5063051000006116  
35 2674363011  
36 2674539019  
37 746211000000116  
38 12759381000006119  
39 8038051000006113  
40 277293014  
41 2674362018  
42 12725251000006119  
43 277294015  
44 386791000000112  
45 365791000000118  
46 2674322017  
47 277291011  
48 380521000000119  
49 7046211000006111  
50 500101000006110  
51 5611121000006118  
52 415107013

For peer review only

1  
2 260879014  
3 289874016  
4 289974015  
5 289980011  
6 312137011  
7 344818012  
8 344819016  
9 344820010  
10 457317011  
11 474077018  
12 1216346016  
13 1231541019  
14 2871720012  
15 139571000006117  
16 306971000006117  
17 313001000006116  
18 313271000006116  
19 313381000006111  
20 313391000006114  
21 315461000006113  
22 316711000006113  
23 458201000006115  
24 683191000006119  
25 695561000006118  
26 880801000006116  
27 907281000006117  
28 1870401000006113  
29 2999011000006111  
30 3019771000006115  
31 3043491000006119  
32 3109051000006115  
33 3408441000006115  
34 3408461000006116  
35 3408471000006111  
36 3408501000006116  
37 4172921000006112  
38 4172951000006115  
39 4173671000006112  
40 4417331000006119  
41 5601561000006117  
42 5601571000006112  
43 5648201000006119  
44 5701111000006119  
45 5701131000006113  
46 5701141000006115  
47 5701151000006118  
48 6623111000006119  
49 6843711000006111  
50 6860401000006118  
51 6870291000006119

For peer review only

1  
2 7057421000006116  
3 7057441000006111  
4 7236901000006114  
5 7236911000006112  
6 7248451000006116  
7  
8 8037771000006119  
9 474077018  
10 306971000006117  
11 4417331000006119  
12  
13 201652012  
14 289875015  
15 289876019  
16 289880012  
17 289881011  
18 289884015  
19 289888017  
20 289889013  
21 292005016  
22 292006015  
23 292009010  
24 292010017  
25 292028015  
26 292031019  
27 292177013  
28 414008012  
29 414151014  
30 414160018  
31 414248013  
32 509741017  
33 1216015014  
34 1216360019  
35 1216396015  
36 202801000006110  
37 306931000006115  
38 311311000006115  
39 311511000006114  
40 314521000006116  
41 555131000006118  
42 731621000006113  
43 880821000006114  
44 880831000006112  
45 880841000006119  
46 2168661000000116  
47 2168671000000111  
48 2168681000000113  
49 2233381000000115  
50 2233421000000112  
51 2233461000000116  
52 3019871000006112  
53 3020041000006112

For peer review only

1  
2 3327891000006112  
3 3327901000006111  
4 3327911000006114  
5 3327921000006118  
6 3327961000006112  
7  
8 3327971000006117  
9 3992621000006112  
10 3992631000006110  
11 4009731000006118  
12 4009741000006111  
13  
14 4416411000006118  
15 4416551000006116  
16 4416591000006110  
17 4416681000006111  
18 4416691000006114  
19  
20 4420051000006115  
21 4420351000006118  
22 4753241000006113  
23 5599791000006114  
24 5599801000006110  
25  
26 5600851000006111  
27 5600941000006116  
28 5601231000006111  
29 5601261000006119  
30 5601291000006110  
31 5601361000006112  
32 5601401000006119  
33 5601461000006118  
34  
35 6347711000006119  
36 6693111000006110  
37  
38 7048071000006112  
39 7048121000006112  
40 7118591000006115  
41 7527551000006112  
42 7716791000006117  
43 7849031000006117  
44 7868981000006116  
45 7995641000006118  
46 8020031000006118  
47  
48 13660051000006110  
49 13937971000006110  
50 14075341000006119  
51  
52 289813015  
53 292170010  
54 414257019  
55 414278016  
56 451429010  
57 2901912012  
58 3517129013  
59  
60 308801000006118

For peer review only

1  
2 309181000006110  
3 763421000006116  
4 763431000006118  
5 1815151000006116  
6 1815161000006119  
7 1815171000006114  
8 1815181000006112  
9 1815221000006115  
10 1815231000006117  
11 1815491000006119  
12 2124491000000113  
13 2124511000000117  
14 2734791000000113  
15 3150381000006111  
16 3393051000006113  
17 3395251000006115  
18 4172561000006112  
19 4172591000006116  
20 4172601000006112  
21 5602251000006111  
22 5602351000006117  
23 5602371000006110  
24 5602571000006115  
25 5975501000006113  
26 6693411000006115  
27 6940861000006118  
28 6940871000006113  
29 7353041000006113  
30 7358451000006113  
31 7361211000006114  
32 7369661000006114  
33 7566531000006112  
34 7569011000006116  
35 13686181000006118  
36 287021015  
37 3081251000006115  
38 3515781000006117  
39  
40  
41  
42  
43  
44  
45  
46  
47  
48  
49  
50  
51  
52  
53  
54  
55  
56  
57  
58  
59  
60

For peer review only

1  
2 Term  
3 HIV disease resulting in wasting syndrome  
4 Asymptomatic HIV Infection - First Presentation  
5 Asymptomatic HIV Infection - Subsequent Presentation  
6 H/O: HIV  
7 [SHHAPT] Attendance for HIV related care  
8 [SHHAPT] New HIV diagnosis - acute - diagnosed prev. elsewhere  
9 HIV monitoring telephone invite  
10 HIV monitoring third telephone invitation  
11 HIV disease resulting in cytomegaloviral disease  
12 HIV disease resulting in candidiasis  
13 [X]HIV disease resulting in unspecified malignant neoplasm  
14 [X]Dementia in human immunodef virus [HIV] disease  
15 HIV dis reslt/oth mal neopl/lymph,h'matopoetc+reltd tissu  
16 HIV disease resulting/unspcf infectious+parasitic disease  
17 HIV positive general health check service declined  
18 [X]HIV disease resulting in multiple infections  
19 HIV - Human immunodeficiency virus infection wasting syndrome  
20 HIV - Human immunodeficiency virus infection  
21 Asymptomatic HIV infection  
22 HIV disease complicating pregnancy childbirth puerperium  
23 Human immunodeficiency virus (HIV) positive  
24 HIV infection with infectious mononucleosis-like syndrome  
25 HIV 2 RNA  
26 HIV-1  
27 HIV 2 gp125 antibody  
28 Leucoplakia of tongue associated with HIV disease  
29 Human immunodeficiency virus (HIV) infection category B2  
30 HIV CDC category B1  
31 HIV WHO class  
32 HIV - Human immunodeficiency virus encephalitis  
33 Pulmonary arterial hypertension associated with HIV infection  
34 Immunoglobulin G antibody to HIV 1  
35 People with HIV or AIDS  
36 Human immunodeficiency virus (HIV) Centers for Disease Control and Prevention (CDC) category C2 (AIDS)  
37 Invasive carcinoma of uterine cervix co-occurrent with HIV (human immunodeficiency virus) infection  
38 Symptomatic HIV (human immunodeficiency virus) I infection  
39 HIV 1 p66 antibody  
40 HIV-1 antigen  
41 HIV - Congenital human immunodeficiency virus positive status syndrome  
42 Human immunodeficiency virus (HIV) viral load  
43 Hairy leucoplakia of tongue associated with HIV disease  
44 HIV WHO class I  
45 HIV-2 p41  
46 WHO 2007 HIV infection clinical stage 3 and tuberculosis  
47 HIV WHO class IV (AIDS)  
48 [X] HIV disease resulting in haematological and immunological abnormalities, not elsewhere classified  
49 HIV 1 p55 antibody  
50 WHO 2007 HIV infection clinical stage 4  
51 [X]HIV disease resulting in multiple diseases classified elsewhere  
52

1 Human immunodeficiency virus (HIV) World Health Organisation (WHO) class  
2 WHO 2007 HIV infection clinical stage 3  
3 HIV 1 p65 antibody  
4 HIV 1 p18 antibody  
5 HIV 2 p68 antibody  
6 Human immunodeficiency virus (HIV) Centers for Disease Control and Prevention (CDC) category A3 (AIDS)  
7 HIV retinopathy  
8 HIV WHO class III  
9 HIV 1 p31 antibody  
10 Deoxyribonucleic acid of HIV 2  
11 HIV (human immunodeficiency virus) type 2 antiviral resistance measurement by RNA (ribonucleic acid) analys  
12 Asymptomatic HIV infection in pregnancy  
13 HIV infection, pediatric  
14 HIV infection, paediatric  
15 Human immunodeficiency virus (HIV) II infection category B1  
16 Human immunodeficiency virus (HIV) World Health Organization (WHO) class finding  
17 Immunoglobulin G antibody to HIV 2  
18 Hivid 375microgram tablets (Roche Products Ltd) 100 tablet  
19 HIV CDC category C3 (AIDS)  
20 Congenital HIV infection  
21 HIV infection with aseptic meningitis  
22 HIV infection WHO 2007 clinical stage 1 co-occurrent with malaria  
23 HIV infection with acute lymphadenitis  
24 HIV (human immunodeficiency virus) type 1 antiviral resistance measurement by RNA (ribonucleic acid) analys  
25 Human immunodeficiency virus (HIV) infection with acute lymphadenitis  
26 Human immunodeficiency virus (HIV) Centers for Disease Control and Prevention (CDC) category B3 (AIDS)  
27 Human immunodeficiency virus (HIV) Centers for Disease Control and Prevention (CDC) category finding  
28 HIV-associated retinopathy  
29 HIV - Human immunodeficiency virus neuropathy  
30 HIV infection WHO 2007 clinical stage 2 co-occurrent with malaria  
31 Hivid 750microgram tablets (Roche Products Ltd)  
32 HIV 1 p28 antibody  
33 Human immunodeficiency virus (HIV) Centers for Disease Control and Prevention (CDC) category B2  
34 Human immunodeficiency virus (HIV) Centers for Disease Control and Prevention (CDC) category C3 (AIDS)  
35 WHO 2007 HIV infection clinical stage 2  
36 HIV - Human immunodeficiency virus myopathy  
37 HIV (human immunodeficiency virus) in childbirth  
38 HIV 1 gp34 antibody  
39 HIV 1 p53 antibody  
40 Human immunodeficiency virus (HIV) II infection category B2  
41 Human immunodeficiency virus type 2 (HIV-2) antibody  
42 HIV 1 IgG  
43 HIV disease resulting in Kaposi sarcoma  
44 Referral to community HIV (human immunodeficiency virus) nurse specialist  
45 Human immunodeficiency virus (HIV) carrier  
46 HIV disease resulting in mycobacterial infection  
47 HIV disease resulting in unspecified malignant neoplasm  
48 HIV disease resulting in multiple diseases CE  
49 [X]HIV disease resulting/other infectious+parasitic diseases  
50 [SHHAPT] New HIV diagnosis - late



1  
2 Hivid  
3 Human immunodeficiency virus (HIV) infection category B1  
4 HIV - Human immunodeficiency virus diarrhea  
5 Human immunodeficiency virus (HIV) World Health Organisation (WHO) class III  
6 Human immunodeficiency virus (HIV) Centers for Disease Control and Prevention (CDC) category A1  
7 WHO 2007 HIV infection clinical stage 2 and tuberculosis  
8 HIV CDC category B3 (AIDS)  
9 HIV 2 antibody positive and HIV 1 antibody cross-reactivity  
10 [D]Laboratory evidence of human immunodeficiency virus [HIV]  
11 Human immunodeficiency virus (HIV) World Health Organization (WHO) class II  
12 HIV 1 p32 antibody  
13 HIV-related sclerosing cholangitis  
14 Proviral deoxyribonucleic acid of HIV 1  
15 Neuropathy caused by HIV - human immunodeficiency virus  
16 HIV 2 proviral DNA  
17 HIV 1 p24 antigen  
18 HIV 1 phenotyping  
19 HIV 1 p58 antibody  
20 Human immunodeficiency virus (HIV) World Health Organisation (WHO) class I  
21 Hivid 750microgram tablets (Roche Products Ltd) 100 tablet  
22 HIV-related microangiopathy of the retina  
23 HIV 1 identification  
24 Extrapulmonary TB (tuberculosis) co-occurrent with HIV (human immunodeficiency virus) infection  
25 HIV (human immunodeficiency virus) viral load by log rank  
26 HIV 1 nucleic acid detection  
27 Oral hairy leucoplakia associated with HIV disease  
28 HIV EIA test positive  
29 WHO 2007 HIV infection clinical stage 1 and tuberculosis  
30 HIV WHO class finding  
31 HIV disease resulting in lymphoid interstitial pneumonitis  
32 HIV (human immunodeficiency virus) disease resulting in haematological and immunological abnormalities  
33 HIV infection  
34 HIV disease resulting in multiple malignant neoplasms  
35 [X]HIV disease resulting/unspcf infectious+parasitic disease  
36 [X]HIV disease resulting in other bacterial infections  
37 HIV-1/HIV-2 antigen/antibody combination immunoassay positive  
38 HIV monitoring first telephone invitation  
39 HIV monitoring second telephone invitation  
40 [SHHAPT] HIV positive  
41 [SHHAPT] New HIV diagnosis - diagnosed previously elsewhere  
42 [SHHAPT] New HIV diagnosis - late - diagnosed prev. elsewhere  
43 HIV Infection With Symptoms, Not AIDS - First Presentation  
44 HIV Infection With Symptoms, Not AIDS - Subsequent Presentation  
45 HIV CDC category A2  
46 HIV - Human immunodeficiency virus leukoencephalopathy  
47 HIV2 - Human immunodeficiency virus type 2  
48 Human immunodeficiency virus (HIV) p24 antigen  
49 HIV 2 gp80 antibody  
50 Human immunodeficiency virus (HIV) World Health Organisation (WHO) class II  
51 HIV viral load

1 Human immunodeficiency virus HIV-related sclerosing cholangitis  
2 Human immunodeficiency virus (HIV) World Health Organisation (WHO) class IV (acquired immunodeficiency s  
3 HIV-1 Antibody  
4 HIV 2 p56 antibody  
5 HIV-1 (human immunodeficiency virus type 1) subtype identification  
6 Human immunodeficiency virus HIV-1 identification  
7 HIV 2 infection  
8 HIV (human immunodeficiency virus) disease resulting in haematological and immunological abnormalities  
9 HIV (human immunodeficiency virus) drug resistance test  
10 Acute HIV infection  
11 HIV (human immunodeficiency virus) viral load  
12 HIV-1 gp120  
13 Human immunodeficiency virus (HIV) World Health Organization class  
14 Anti-HIV 1 IgG  
15 HIV WHO 2007 infection clinical stage 3 co-occurrent with malaria  
16 HIV - Human immunodeficiency virus infection constitutional disease  
17 HIV (Human immunodeficiency virus) positive general health check service declined - enhanced services admir  
18 HIV p24 antigen  
19 HIV disease resulting in Pneumocystis jirovecii pneumonia  
20 [X]HIV disease resulting in other viral infections  
21 [X]HIV disease resulting in other non-Hodgkin's lymphoma  
22 [SHHAPT] New HIV diagnosis  
23 HIV 1 p15 antibody  
24 [RFC] HIV/AIDS  
25 HIV infection  
26 Human immunodeficiency virus (HIV) World Health Organization (WHO) class  
27 HIV 1 p26 antibody  
28 Human immunodeficiency virus (HIV) World Health Organisation (WHO) class finding  
29 Hairy leukoplakia of tongue associated with HIV disease  
30 Oral hairy leukoplakia associated with HIV disease  
31 HIV (human immunodeficiency virus) 1 genotype determination by RNA (ribonucleic acid) analysis  
32 Human immunodeficiency virus (HIV) World Health Organisation class  
33 HIV  
34 HIV CDC category B2  
35 HIV 1 p17 antibody  
36 HIV-1 gp160  
37 HIV 2 p24 antibody  
38 Anti-HIV 2 IgG  
39 HIV ELISA test positive  
40 Human immunodeficiency virus (HIV) World Health Organization (WHO) class III  
41 HIV - Human immunodeficiency virus  
42 Symptomatic human immunodeficiency virus (HIV) I infection  
43 Increased human immunodeficiency virus (HIV) viral load  
44 HIV CDC category  
45 HIV - Human immunodeficiency virus enteropathy  
46 HIV 1 genotyping  
47 HIV CDC category A1  
48 HIV 2 p41 antibody  
49 HIV 1 p64 antibody  
50 Serologic test for HIV-1

1 Human immunodeficiency virus (HIV) 1 antigen  
 2 HIV WHO 2007 infection clinical stage 4 co-occurrent with malaria  
 3 HIV 1 proviral DNA  
 4 [X]HIV disease resulting in other non-Hodgkin lymphoma  
 5 HIV disease resulting in multiple infections  
 6 HIV disease result/haematological+immunologic abnorms,NEC  
 7 [X]HIV dis reslt/oth mal neopl/lymph,h'matopoetc+reltd tissu  
 8 [X]HIV disease resulting in other mycoses  
 9 [X]HIV disease resulting in other specified conditions  
 10 [X]Unspecified human immunodeficiency virus [HIV] disease  
 11 [SHHAPT] New HIV diagnosis - acute  
 12 [RFC] AIDS/HIV  
 13 HIV positive  
 14 HIV 1 gp105 antibody  
 15 Finding of HIV status  
 16 HIV 2 IgG  
 17 Human immunodeficiency virus (HIV) infection with infectious mononucleosis-like syndrome  
 18 Human immunodeficiency virus (HIV) World Health Organization (WHO) class I  
 19 HIV - Human immunodeficiency virus leucoencephalopathy  
 20 Human immunodeficiency virus (HIV) 2 gp125 antibody assay  
 21 [X]HIV disease resulting in multiple diseases classified elsewhere  
 22 HIV CDC category C2 (AIDS)  
 23 HIV CDC category C1 (AIDS)  
 24 WHO 2007 HIV infection clinical stage 4 and tuberculosis  
 25 Human immunodeficiency virus (HIV) Centers for Disease Control and Prevention (CDC) category C1 (AIDS)  
 26 HIV 1 gp120 antibody  
 27 Hivid  
 28 Leukoplakia of tongue associated with HIV disease  
 29 HIV - Human immunodeficiency virus diarrhoea  
 30 HIV-2  
 31 HIV 2 gp36 antibody  
 32 WHO 2007 HIV infection clinical stage 1  
 33 HIV 2 p26 antibody  
 34 HIV CDC category A3 (AIDS)  
 35 HIV (human immunodeficiency virus) 1 antibody presence in serum  
 36 HIV WHO class II  
 37 Human immunodeficiency virus (HIV) infection with aseptic meningitis  
 38 HIV fusion inhibitor  
 39 HIV 1 gp160 antibody  
 40 Hivid 375microgram tablets (Roche Products Ltd)  
 41 Human immunodeficiency virus (HIV) World Health Organization (WHO) class IV (acquired immunodeficiency s  
 42 HIV 1 p23 antibody  
 43 HIV disease resulting in other types of non-Hodgkin lymphoma  
 44 HIV disease resulting in Burkitt lymphoma  
 45 Seen by community HIV (human immunodeficiency virus) nurse  
 46 HIVEP2 (human immunodeficiency virus type I enhancer binding protein 2) related intellectual disability  
 47 Adverse reaction to Hivid  
 48 HIV 1 p51 antibody  
 49 Neuropathy due to HIV - human immunodeficiency virus  
 50 [X]Hiv disease resulting in hematological and immunological abnormalities, not elsewhere classified

1 Proviral deoxyribonucleic acid of HIV 2  
2 HIV (human immunodeficiency virus) antibody/antigen (Duo)  
3 HIV1 (human immunodeficiency virus 1) antibody level  
4 Asymptomatic human immunodeficiency virus infection  
5 Human immunodeficiency virus with constitutional disease  
6 Burkitt's lymphoma co-occurrent with human immunodeficiency virus infection  
7 Human immunodeficiency virus infection wasting syndrome  
8 Immunodeficiency due to human immunodeficiency virus infection  
9 Human immunodeficiency virus positive  
10 World Health Organization 2007 Human immunodeficiency virus infection clinical stage 4  
11 World Health Organization 2007 Human immunodeficiency virus infection clinical stage 2  
12 Acute endocarditis co-occurrent with human immunodeficiency virus infection  
13 Neuralgia co-occurrent with human immunodeficiency virus infection  
14 Congenital human immunodeficiency virus infection  
15 Human immunodeficiency virus Centers for Disease Control and Prevention category B1  
16 Human immunodeficiency virus, type I glycoprotein 41 antibody  
17 Anemia co-occurrent with human immunodeficiency virus infection  
18 Pyrexia of unknown origin co-occurrent with human immunodeficiency virus infection  
19 Human immunodeficiency virus, type I protein 15 antibody  
20 Infectious gastroenteritis co-occurrent with human immunodeficiency virus infection  
21 Human immunodeficiency virus antibodies positive and p24 antigen positive  
22 Progressive multifocal leukoencephalopathy co-occurrent with human immunodeficiency virus infection  
23 Human immunodeficiency virus 1 ribonucleic acid measurement by nucleic acid amplification test  
24 Strongyloidiasis co-occurrent with human immunodeficiency virus infection  
25 Enlargement of liver co-occurrent with human immunodeficiency virus infection  
26 Human immunodeficiency virus fusion inhibitor  
27 Human immunodeficiency virus  
28 Disorder of central nervous system co-occurrent with human immunodeficiency virus infection  
29 Human immunodeficiency virus, type II glycoprotein 125 antibody  
30 Salmonellosis co-occurrent with human immunodeficiency virus infection  
31 Infection caused by Nocardia co-occurrent with human immunodeficiency virus infection  
32 Progressive multifocal leukoencephalopathy co-occurrent with human immunodeficiency virus infection  
33 Organic brain syndrome co-occurrent with human immunodeficiency virus infection  
34 Reactive for Human immunodeficiency virus antibody  
35 Extrapulmonary tuberculosis co-occurrent with human immunodeficiency virus infection  
36 Human immunodeficiency virus 2 glycoprotein 125 antibody  
37 Measurement of Human immunodeficiency virus 2 glycoprotein 105 antibody  
38 Human immunodeficiency virus World Health Organization 2007 stage 1 co-occurrent with malaria  
39 Human immunodeficiency virus, type I protein 23 antibody  
40 Oral hairy leucoplakia associated with human immunodeficiency virus disease  
41 Antibody to human immunodeficiency virus, type II protein 16  
42 Human immunodeficiency virus IgG avidity  
43 Human immunodeficiency virus 1 genotyping  
44 Myocarditis co-occurrent with human immunodeficiency virus infection  
45 Proviral deoxyribonucleic acid of Human immunodeficiency virus 2  
46 Invasive carcinoma of uterine cervix co-occurrent with human immunodeficiency virus infection  
47 Disorder of peripheral nervous system co-occurrent with human immunodeficiency virus infection  
48 Infection caused by Cytomegalovirus co-occurrent with human immunodeficiency virus infection  
49 Recurrent salmonella septicaemia co-occurrent with human immunodeficiency virus infection  
50 Determination of susceptibility of Human immunodeficiency virus 1 to panel of antiretroviral drugs using phen

1 Human immunodeficiency virus World Health Organization 2007 stage 2 co-occurrent with malaria  
2 Human immunodeficiency virus, type I protein 66 antibody  
3 Human immunodeficiency virus, type I glycoprotein 34 antibody  
4 Human immunodeficiency virus, type II protein 68 antibody  
5 Oral hairy leukoplakia associated with human immunodeficiency virus disease  
6 Human immunodeficiency virus 2 protein 53 antibody  
7 Bacterial pneumonia co-occurrent with human immunodeficiency virus infection  
8 Antibody to human immunodeficiency virus, type I protein 40  
9 Splenomegaly co-occurrent with human immunodeficiency virus infection  
10 Sequela of infection caused by Human immunodeficiency virus  
11 Human immunodeficiency virus World Health Organization class III  
12 Acquired haemolytic anaemia co-occurrent with human immunodeficiency virus infection  
13 Finding of human immunodeficiency virus antibody titre  
14 Candidiasis of esophagus co-occurrent with human immunodeficiency virus infection  
15 Symptomatic human immunodeficiency virus I infection  
16 Hairy leukoplakia of tongue associated with human immunodeficiency virus disease  
17 Human immunodeficiency virus encephalitis  
18 Human immunodeficiency virus, type I protein 17 antibody  
19 Human immunodeficiency virus 1 phenotyping  
20 Disorder of respiratory system co-occurrent with human immunodeficiency virus infection  
21 Disseminated infection caused by Strongyloides co-occurrent with human immunodeficiency virus infection  
22 Human immunodeficiency virus, type II protein 16 antibody  
23 Isosporiasis co-occurrent with human immunodeficiency virus infection  
24 Human immunodeficiency virus, type I protein 24 antigen  
25 Human immunodeficiency virus 2 glycoprotein 120 antibody  
26 Reticulosarcoma co-occurrent with human immunodeficiency virus infection  
27 Human immunodeficiency virus World Health Organization 2007 stage 4 co-occurrent with tuberculosis  
28 Human immunodeficiency virus, type I glycoprotein 105 antibody  
29 Human immunodeficiency virus leukoencephalopathy  
30 Visual impairment co-occurrent with human immunodeficiency virus infection  
31 Human immunodeficiency virus Centers for Disease Control and Prevention category finding  
32 Human immunodeficiency virus, type I glycoprotein 40 Ab  
33 Primary cerebral lymphoma co-occurrent with human immunodeficiency virus infection  
34 Nocardiosis co-occurrent with human immunodeficiency virus infection  
35 World Health Organization 2007 Human immunodeficiency virus infection clinical stage 1  
36 Human immunodeficiency virus II infection  
37 Leucoplakia of tongue associated with human immunodeficiency virus disease  
38 Human immunodeficiency virus 2 DNA  
39 Immunoglobulin G antibody to Human immunodeficiency virus type 2  
40 Proviral deoxyribonucleic acid of Human immunodeficiency virus 1  
41 Human immunodeficiency virus, type II protein 41 antibody  
42 Human immunodeficiency virus-associated periodontitis  
43 Human immunodeficiency virus I infection  
44 Human immunodeficiency virus, type I glycoprotein antigen 120  
45 Disorder of skin co-occurrent with human immunodeficiency virus infection  
46 Facial lipoatrophy associated with human immunodeficiency virus  
47 Human immunodeficiency virus drug resistance test  
48 Asymptomatic human immunodeficiency virus infection in pregnancy  
49 Human immunodeficiency virus antibody  
50 Dermatophytosis co-occurrent with human immunodeficiency virus infection

1 Herpes zoster infection co-occurrent with human immunodeficiency virus infection  
2 Diffuse non-Hodgkin's immunoblastic lymphoma co-occurrent with human immunodeficiency virus infection  
3 Human immunodeficiency virus infection with acute lymphadenitis  
4 Human immunodeficiency virus, type I glycoprotein 160 antibody  
5 Human immunodeficiency virus antibody titer - finding  
6 Human immunodeficiency virus 2 RNA  
7 Human immunodeficiency virus, type I protein 40 Ab  
8 Immunoglobulin G antibody to Human immunodeficiency virus type 1  
9 Human immunodeficiency virus, type 1 glycoprotein antigen 160  
10 Human immunodeficiency virus, type II glycoprotein 36 antibody  
11 Renal failure syndrome co-occurrent with human immunodeficiency virus infection  
12 Opportunistic mycosis co-occurrent with human immunodeficiency virus infection  
13 Infective arthritis co-occurrent with human immunodeficiency virus infection  
14 Human immunodeficiency virus Centers for Disease Control and Prevention category A1  
15 Human immunodeficiency virus, type I protein 31 antibody  
16 Human immunodeficiency virus diarrhea  
17 Human immunodeficiency virus-related sclerosing cholangitis  
18 Human immunodeficiency virus carrier  
19 Non-Hodgkin lymphoma associated with Human immunodeficiency virus infection  
20 Human immunodeficiency virus infection with secondary clinical infectious disease  
21 Human immunodeficiency virus infection monitoring telephone invitation  
22 Human immunodeficiency virus infection monitoring third telephone invitation  
23 Human immunodeficiency virus, type II protein 26 antibody  
24 Neuropathy due to human immunodeficiency virus  
25 Human immunodeficiency virus 1 RNA  
26 Human immunodeficiency virus antibody positive  
27 Presenile dementia co-occurrent with human immunodeficiency virus infection  
28 Demyelinating disease of central nervous system co-occurrent with human immunodeficiency virus infection  
29 Infection caused by Dermatophyte co-occurrent with human immunodeficiency virus infection  
30 Pneumocystosis co-occurrent with human immunodeficiency virus infection  
31 Coccidiosis co-occurrent with human immunodeficiency virus infection  
32 Copies of human immunodeficiency virus ribonucleic acid above reference range  
33 Heart disease co-occurrent with human immunodeficiency virus infection  
34 Human immunodeficiency virus, type I protein 51 antibody  
35 Myelitis co-occurrent with human immunodeficiency virus infection  
36 Human immunodeficiency virus antibody titre - finding  
37 Human immunodeficiency virus viral load  
38 Human immunodeficiency virus, type I protein 55 antibody  
39 Acquired hemolytic anemia co-occurrent with human immunodeficiency virus infection  
40 Human immunodeficiency virus, type I protein 53 antibody  
41 Human immunodeficiency virus, type I protein 32 antibody  
42 Reactive for human immunodeficiency virus p24 antigen  
43 Anaemia co-occurrent with human immunodeficiency virus infection  
44 Recurrent bacterial pneumonia co-occurrent with human immunodeficiency virus infection  
45 Recurrent salmonella septicemia co-occurrent with human immunodeficiency virus infection  
46 Candidiasis of upper respiratory tract co-occurrent with human immunodeficiency virus infection  
47 Congenital human immunodeficiency virus positive status syndrome  
48 Human immunodeficiency virus infection with neurological disease  
49 Human immunodeficiency virus with other clinical findings  
50 Acquired human immunodeficiency virus infection syndrome NOS



1 Human immunodeficiency virus infection monitoring invitation  
2 Human immunodeficiency virus Centers for Disease Control and Prevention category B3 (acquired immunodeficiency)  
3 Human immunodeficiency virus, type I protein 26 antibody  
4 Human immunodeficiency virus leucoencephalopathy  
5 Human immunodeficiency virus encephalopathy  
6 Hairy leucoplakia of tongue associated with human immunodeficiency virus disease  
7 Disorder of spinal cord co-occurrent with human immunodeficiency virus infection  
8 Proviral DNA of Human immunodeficiency virus 2  
9 Human immunodeficiency virus World Health Organization class I  
10 Human immunodeficiency virus, type I protein 18 antibody  
11 Pediatric human immunodeficiency virus infection  
12 Infection of upper respiratory tract caused by *Candida* co-occurrent with human immunodeficiency virus infection  
13 Disseminated atypical infection caused by *Mycobacterium* co-occurrent with human immunodeficiency virus infection  
14 Diffuse non-Hodgkin immunoblastic lymphoma co-occurrent with human immunodeficiency virus infection  
15 Human immunodeficiency virus 2 antibody positive and Human immunodeficiency virus 1 antibody cross-reactive  
16 Agranulocytosis co-occurrent with human immunodeficiency virus infection  
17 Human immunodeficiency virus, type II glycoprotein 80 antibody  
18 Human immunodeficiency virus, type II glycoprotein 140 Ab  
19 Human immunodeficiency virus 1 antigen  
20 Asymptomatic human immunodeficiency virus A2 infection  
21 Human immunodeficiency virus World Health Organization class finding  
22 Skin rash co-occurrent with human immunodeficiency virus infection  
23 Human immunodeficiency virus, type I protein 28 antibody  
24 Multidermatomal infection caused by Herpes zoster co-occurrent with human immunodeficiency virus infection  
25 Nephrotic syndrome co-occurrent with human immunodeficiency virus infection  
26 Infection caused by *Salmonella* co-occurrent with human immunodeficiency virus infection  
27 Human immunodeficiency virus World Health Organization class IV (acquired immunodeficiency syndrome)  
28 Human immunodeficiency virus World Health Organization 2007 stage 3 co-occurrent with tuberculosis  
29 Human immunodeficiency virus World Health Organization 2007 stage 3 co-occurrent with malaria  
30 Human immunodeficiency virus DNA  
31 Infection caused by herpes simplex virus co-occurrent with human immunodeficiency virus infection  
32 Aplastic anemia co-occurrent with human immunodeficiency virus infection  
33 Cytomegalovirus infection co-occurrent with human immunodeficiency virus infection  
34 Focal segmental glomerulosclerosis co-occurrent with human immunodeficiency virus infection  
35 Subacute adenoviral encephalitis co-occurrent with human immunodeficiency virus infection  
36 Human immunodeficiency virus diarrhoea  
37 Human immunodeficiency virus infection with aseptic meningitis  
38 Paediatric human immunodeficiency virus infection  
39 Immune reconstitution inflammatory syndrome caused by human immunodeficiency virus infection  
40 Human immunodeficiency virus neuropathy  
41 Human immunodeficiency virus enteropathy  
42 Disorder of eye proper co-occurrent with human immunodeficiency virus infection  
43 Infection caused by *Aspergillus* co-occurrent with human immunodeficiency virus infection  
44 Human immunodeficiency virus 1 ribonucleic acid  
45 Human immunodeficiency virus infection constitutional disease  
46 Human immunodeficiency virus monitoring admin.  
47 Human immunodeficiency virus annual review  
48 Human immunodeficiency virus viral load by log rank  
49 Pulmonary arterial hypertension associated with human immunodeficiency virus infection  
50 Human immunodeficiency virus infection

1 Anti-Human immunodeficiency virus, type II glycoprotein 140 antibody  
2 Candidiasis of oesophagus co-occurrent with human immunodeficiency virus infection  
3 Nephropathy co-occurrent with human immunodeficiency virus infection  
4 People with human immunodeficiency virus or acquired immune deficiency syndrome  
5 Human immunodeficiency virus in mother complicating childbirth  
6 Human immunodeficiency virus Centers for Disease Control and Prevention category  
7 Asymptomatic human immunodeficiency virus A1 infection  
8 Human immunodeficiency virus I glycoprotein 43 antibody  
9 Human immunodeficiency virus  
10 Human immunodeficiency virus World Health Organization class  
11 Human immunodeficiency virus 2 glycoprotein 34 antibody  
12 Human immunodeficiency virus non-pathogenic diarrhoea  
13 History of asymptomatic human immunodeficiency virus infection  
14 Human immunodeficiency virus Centers for Disease Control and Prevention category B  
15 Human immunodeficiency virus Centers for Disease Control and Prevention category A3 (acquired immunodeficiency)  
16 Human immunodeficiency virus 1 DNA  
17 Leukoplakia of tongue associated with human immunodeficiency virus disease  
18 Gastrointestinal malabsorption syndrome co-occurrent with human immunodeficiency virus infection  
19 Human immunodeficiency virus, type II glycoprotein 140 antibody  
20 Radiculitis co-occurrent with human immunodeficiency virus infection  
21 Human immunodeficiency virus 1 protein 68 antibody  
22 Infection caused by Microsporidia co-occurrent with human immunodeficiency virus infection  
23 Burkitt lymphoma co-occurrent with human immunodeficiency virus infection  
24 Human immunodeficiency virus infection with persistent generalised lymphadenopathy  
25 Finding of human immunodeficiency virus antibody titer  
26 Human immunodeficiency virus Centers for Disease Control and Prevention category C2 (acquired immunodeficiency)  
27 Human immunodeficiency virus 1 protein 24 antibody  
28 Large liver co-occurrent with human immunodeficiency virus infection  
29 Infection caused by Cryptosporidium co-occurrent with human immunodeficiency virus infection  
30 Human immunodeficiency virus 2 protein 31 antibody  
31 Antibody to human immunodeficiency virus, type II glycoprotein 140  
32 Human immunodeficiency virus, type I glycoprotein 120 antibody  
33 Human immunodeficiency virus p24 antigen positive  
34 Human immunodeficiency virus, type I protein 40 antibody  
35 Human immunodeficiency virus enzyme-linked immunosorbent assay test positive  
36 Human immunodeficiency virus 1 genotype determination by ribonucleic acid analysis  
37 Cardiomyopathy co-occurrent with human immunodeficiency virus infection  
38 Human immunodeficiency virus p24 antigen  
39 Malignant neoplastic disease co-occurrent with human immunodeficiency virus infection  
40 Parkinsonism due to human immunodeficiency virus infection  
41 Anti-Human immunodeficiency virus, type I protein 40 antibody  
42 Anti-Human immunodeficiency virus, type I glycoprotein 40 antibody  
43 Symptomatic human immunodeficiency virus infection  
44 Malignant neoplastic disease co-occurrent with human immunodeficiency virus infection  
45 [V]Asymptomatic human immunodeficiency virus infection status  
46 Acute human immunodeficiency virus seroconversion illness  
47 Human immunodeficiency virus Centers for Disease Control and Prevention category B2  
48 [X]Human immunodeficiency virus disease  
49 Candidiasis of mouth co-occurrent with human immunodeficiency virus infection  
50 Human immunodeficiency virus type 1 subtype identification



1 Human immunodeficiency virus 2 protein 58 antibody  
2 Deoxyribonucleic acid of Human immunodeficiency virus 2  
3 Finding of human immunodeficiency virus status  
4 Hepatitis B associated with Human immunodeficiency virus infection  
5 Disorder of kidney co-occurrent with human immunodeficiency virus infection  
6 Human immunodeficiency virus World Health Organization class II  
7 Hemophagocytic syndrome co-occurrent with human immunodeficiency virus infection  
8 Disorder of eye co-occurrent with human immunodeficiency virus infection  
9 Hepatomegaly co-occurrent with human immunodeficiency virus infection  
10 Human immunodeficiency virus viral load by log rank  
11 Human immunodeficiency virus, type II antibody  
12 Human immunodeficiency virus, type II protein 16 Ab  
13 Human immunodeficiency virus type I  
14 Human immunodeficiency virus 2 protein 55 antibody  
15 Human immunodeficiency virus antigen test  
16 Human immunodeficiency virus, type II protein 24 antibody  
17 Human immunodeficiency virus, type II protein 56 antibody  
18 Determination of coreceptor tropism of Human immunodeficiency virus 1  
19 Infection caused by herpes zoster virus co-occurrent with human immunodeficiency virus infection  
20 Human immunodeficiency virus type 2 antiviral resistance measurement by ribonucleic acid analysis  
21 Infection caused by Pneumocystis co-occurrent with human immunodeficiency virus infection  
22 Human immunodeficiency virus, type I protein 65 antibody  
23 H/O asymptomatic human immunodeficiency virus infection  
24 Determination of susceptibility of Human immunodeficiency virus 1 to panel of antiretroviral drugs using geno  
25 Infection caused by Strongyloides co-occurrent with human immunodeficiency virus infection  
26 Eruption of skin co-occurrent with human immunodeficiency virus infection  
27 Human immunodeficiency virus World Health Organization 2007 stage 2 co-occurrent with tuberculosis  
28 Human immunodeficiency virus complicating pregnancy childbirth and the puerperium  
29 Dementia co-occurrent with human immunodeficiency virus infection  
30 Human immunodeficiency virus, type I protein 58 antibody  
31 Infection caused by Coccidia co-occurrent with human immunodeficiency virus infection  
32 Antibody to human immunodeficiency virus, type I glycoprotein 40  
33 World Health Organization 2007 Human immunodeficiency virus infection clinical stage 3  
34 Human immunodeficiency virus, type II protein antigen 41  
35 Human immunodeficiency virus type 1 antibody  
36 Human immunodeficiency virus myopathy  
37 Human immunodeficiency virus infection with infectious mononucleosis-like syndrome  
38 Human immunodeficiency virus deoxyribonucleic acid  
39 Disorder of gastrointestinal tract co-occurrent with human immunodeficiency virus infection  
40 Aplastic anaemia co-occurrent with human immunodeficiency virus infection  
41 Acute human immunodeficiency virus infection  
42 Human immunodeficiency virus type 2 antibody  
43 Human immunodeficiency virus type 1  
44 Human immunodeficiency virus World Health Organization 2007 stage 1 co-occurrent with tuberculosis  
45 Fever of unknown origin co-occurrent with human immunodeficiency virus infection  
46 Human immunodeficiency virus type 1 antiviral resistance measurement by ribonucleic acid analysis  
47 Human immunodeficiency virus infection monitoring first telephone invitation  
48 Human immunodeficiency virus type 1 identification  
49 Human immunodeficiency virus 2 protein 15 antibody  
50 Human immunodeficiency virus type 2  
51  
52  
53  
54  
55  
56  
57  
58  
59  
60

1 Human immunodeficiency virus 2 glycoprotein 36 antibody  
2 Microsporidiosis co-occurrent with human immunodeficiency virus infection  
3 Recurrent salmonella sepsis co-occurrent with human immunodeficiency virus infection  
4 Reactive for both human immunodeficiency virus antibodies and p24 antigen  
5 Neuritis co-occurrent with human immunodeficiency virus infection  
6 Neuropathy caused by human immunodeficiency virus  
7 Ribonucleic acid of Human immunodeficiency virus 2  
8 Human immunodeficiency virus, type I glycoprotein 40 antibody  
9 Polyneuropathy co-occurrent with human immunodeficiency virus infection  
10 Human immunodeficiency virus medication review  
11 Human immunodeficiency virus 1 and virus 2 antibodies and Human immunodeficiency virus 1 p24 antigen co  
12 Human immunodeficiency virus 1 deoxyribonucleic acid  
13 Human immunodeficiency virus Centers for Disease Control and Prevention category C1 (acquired immunodef  
14 Human immunodeficiency virus infection with persistent generalized lymphadenopathy  
15 Human immunodeficiency virus with secondary cancers  
16 Human immunodeficiency virus 2 glycoprotein 105 antibody  
17 Lymphadenopathy co-occurrent with human immunodeficiency virus infection  
18 Immunoblastic lymphoma co-occurrent with human immunodeficiency virus infection  
19 Human immunodeficiency virus monitoring  
20 Human immunodeficiency virus with neurological disease  
21 Anti-Human immunodeficiency virus, type II protein 16 antibody  
22 Human immunodeficiency virus World Health Organization 2007 stage 4 co-occurrent with malaria  
23 Herpes simplex virus infection co-occurrent with human immunodeficiency virus infection  
24 Human immunodeficiency virus Centers for Disease Control and Prevention category C3 (acquired immunodef  
25 Human immunodeficiency virus non-pathogenic diarrhea  
26 Human immunodeficiency virus type I enhancer binding protein 2 related intellectual disability  
27 Proviral DNA of Human immunodeficiency virus 1  
28 Human immunodeficiency virus Centers for Disease Control and Prevention category A2  
29 Human immunodeficiency virus, type I protein 64 antibody  
30 Chronic infection caused by herpes simplex virus co-occurrent with human immunodeficiency virus infection  
31 Aspergillosis co-occurrent with human immunodeficiency virus infection  
32 Human immunodeficiency virus positive general health check service declined  
33 Referral to community human immunodeficiency virus nurse specialist  
34 Human immunodeficiency virus infection monitoring second telephone invitation  
35 [V]Asymptomatic human immunodeficiency virus infection status  
36 aids carrier  
37 notification of aids  
38 aids  
39 aids - acquired immunodeficiency syndrome  
40 acquired immune deficiency syndrome (aids)  
41 aids - first presentation  
42 aids - subsequent presentation  
43 kaposi sarcoma associated with aids  
44 mycobacteriosis associated with aids  
45 dementia associated with aids  
46 aids - acquired immune deficiency syndrome dementia complex  
47 pneumonia associated with aids  
48 cachexia associated with aids  
49 hiv infection with symptoms, not aids - first presentation  
50 hiv infection with symptoms, not aids - subsequent presentation

1  
2 aids +viral/chlamydial dis.nos  
3 [rfc] hiv/aids  
4 [rfc] aids/hiv  
5 aids carrier  
6 notification of aids  
7 Transplantation of pancreas  
8 Renal transplant  
9 Replacement of previous liver transplant  
10 Renewal of transplanted pancreatic tissue  
11 Cadaveric renal transplant  
12 Exploration of renal transplant  
13 Kidney transplant failure and rejection  
14 Heart transplant failure and rejection  
15 Heart-lung transplant failure and rejection  
16 Single lung transplant  
17 Double lung transplant  
18 Renal transplant rejection  
19 Very mild acute rejection of renal transplant  
20 Acute rejection of renal transplant - grade I  
21 Chronic transplant nephropathy  
22 Acute-on-chronic rejection of renal transplant  
23 Unexplained episode of renal transplant dysfunction  
24 Transplantation of islets of Langerhans  
25 Transplant biopsy  
26 Pancreas transplant  
27 Renal transplant rejected  
28 Post-transplant bronchiolitis obliterans syndrome  
29 Lung transplant evaluation  
30 Urological complication of renal transplant  
31 Vascular complication of renal transplant  
32 Rupture of artery of transplanted kidney  
33 Paediatric transplantation surgery  
34 Transplantation of heart and lung NOS  
35 Other specified other transplantation of heart  
36 Other specified transplantation of kidney  
37 Transplantation of kidney NOS  
38 Orthotopic transplantation of liver  
39 Renal transplant with complication  
40 Piggy back liver transplant  
41 Interventions associated with transplantation of kidney NOS  
42 Allotransplantation of kidney from cadaver  
43 Excision of rejected transplanted kidney  
44 Corneal transplant  
45 Renal transplant rejected  
46 [V]Pancreas transplanted  
47 Transplanted liver present  
48 Tx - Kidney transplantation  
49 SLTx - Single lung transplant  
50 Mild chronic transplant nephropathy  
51 History of renal transplant

1 Liver transplant recipient  
2 Whole organ pancreatic transplant  
3 Hepatic transplantation  
4 PTLD - Post-transplant lymphoproliferative disorder  
5 Exploration of kidney transplant  
6 Kidney transplant  
7 [V]Liver transplanted  
8 History of organ transplant  
9 History of being lung transplant recipient  
10 Heart transplant  
11 Allotransplantation of kidney with DBD (donation after brain stem death)  
12 Renal autotransplantation or reimplantation of kidney  
13 LTx - Liver transplant  
14 Tx - Renal transplantation  
15 Xenotransplant of heart  
16 Transplant of lung  
17 Islet cell transplant  
18 Autotransplant kidney  
19 Disorder affecting transplant  
20 DLTx - Double lung transplant  
21 Tx - Liver transplantation  
22 Piggy-back liver transplant  
23 Allotransplant of heart and lung  
24 Heart transplant  
25 Structure of transplanted liver  
26 Anaesthesia for corneal transplant  
27 MR angiography of transplanted kidney  
28 Magnetic resonance angiography of transplanted kidney  
29 Monomorphic posttransplant lymphoproliferative disorder  
30 Immunosuppressive therapy for transplant  
31 Awaiting transplantation of lung  
32 Radionuclide imaging of transplanted kidney  
33 Renal homotransplantation excluding donor and recipient nephrectomy  
34 Renal transplant venogram  
35 Infectious mononucleosis-like post-transplant lymphoproliferative disorder  
36 Aftercare for liver transplant done  
37 Emergency hospital admission to cardiothoracic transplantation surgery service  
38 [V]Kidney transplanted  
39 Structure of transplanted kidney  
40 Ultrasound scan of transplant liver  
41 Failed renal transplant  
42 Specimen from transplanted lung obtained by excision  
43 Rejection of pancreas transplant  
44 Percutaneous transhepatic transplantation of pancreatic islet cell using fluoroscopic guidance  
45 Transplantation of kidney and pancreas  
46 Transplanted cornea  
47 Liver transplant rejection  
48 Entire transplanted pancreatic islets  
49 Cardiac transplant disorder  
50 Fluoroscopic venography of transplanted pancreas using contrast

1 Anaesthesia for heart/lung transplant  
2 Anesthesia for heart/lung transplant  
3 Retrograde insertion of ureteric stent into ureter of transplanted kidney using fluoroscopic guidance  
4 Double lung transplant en bloc  
5 Lung transplant rejection  
6 Post transplant lymphoproliferative disorder  
7 Bronchiolitis obliterans syndrome due to and after lung transplantation  
8 Transplant renal artery stenosis  
9 Disorder of heart muscle associated with rejection of cardiac transplant  
10 Laparoscopic biopsy of transplanted pancreas  
11 Doppler ultrasonography (US) of transplanted kidney  
12 Liver transplant recipient  
13 History of heart-lung transplant recipient  
14 Entire transplanted islets of Langerhans  
15 Emergency hospital admission to transplantation surgery service  
16 Disorder of transplanted heart  
17 Structure of renal artery of transplanted kidney  
18 Double lung transplant as a block  
19 Renal transplant venogram  
20 Transplanted heart-lung present  
21 BSSLTx - Bilateral sequential single lung transplant  
22 Chronic rejection of liver transplant  
23 Reactive plasmacytic hyperplasia post-transplant lymphoproliferative disorder  
24 Lung transplant recipient  
25 Transplanted lung resection sample  
26 Anesthesia for renal transplant  
27 Heterotransplant of pancreas  
28 Anesthesia for corneal transplant  
29 Discharge from transplant surgery service  
30 Revision of transplantation of heart  
31 Renal transplant angiogram  
32 History of pancreas transplant  
33 Allotransplantation of lobe of lung from live donor  
34 Transplanted kidney present  
35 Complication of transplanted liver  
36 Homotransplant of pancreas  
37 Anaesthesia for heart transplant  
38 Primary non-function of renal transplant  
39 Kidney transplant recipient  
40 History of transplantation of pancreas  
41 Early post-transplant lymphoproliferative disorder  
42 Cornea transplant recipient  
43 Liver transplant without recipient hepatectomy  
44 Fluoroscopic venography of renal transplant  
45 Hyperacute rejection of pancreas transplant  
46 Fluoroscopic angiography of transplanted liver  
47 [V]Lung transplanted  
48 Renal transplant recipient  
49 Fluoroscopy guided retrograde insertion of stent into ureter of transplanted kidney  
50 Cardiothoracic transplantation care plan

1 Liver transplant failure  
2 Cardiac transplant failure  
3 Perfusion injury of renal transplant  
4 Disorder related to renal transplantation  
5 Accelerated rejection of pancreas transplant  
6 Transplanted lung  
7 Bilateral sequential single lung transplant  
8 Hyperacute rejection of renal transplant  
9 Transplanted lung present  
10 Emergency hospital admission to paediatric transplantation surgery service  
11 Fluoroscopy guided removal of nephrostomy tube from transplanted kidney  
12 Acute rejection of lung transplant  
13 Heart transplant recipient  
14 Kidney transplant evaluation  
15 Entire transplanted lung  
16 Cardiac transplant rejection  
17 Doppler ultrasound scan of transplanted kidney  
18 Structure of transplanted islets of Langerhans  
19 Living donor liver transplantation  
20 Disorder related to lung transplantation  
21 Chronic rejection of cardiac transplant  
22 Structure of transplanted cornea  
23 Transplanted kidney  
24 LTx - Lung transplant  
25 Allotransplantation of kidney from non-beating heart cadaver  
26 Transplanted cornea present  
27 Transplant present  
28 Percutaneous needle biopsy of transplanted pancreas  
29 Heart-lung transplant recipient  
30 Spinal cord transplantation  
31 CT of transplanted liver  
32 Cardiovascular system transplantation  
33 Ultrasound guided biopsy of transplanted liver  
34 Anaesthesia for renal transplant  
35 US scan of transplant pancreas  
36 Structure of transplanted lung  
37 Allotransplantation of right kidney  
38 Allogeneic transplantation of pancreatic islet cells  
39 Transplanted heart  
40 Disorder of myocardium associated with rejection of cardiac transplant  
41 Pretransplant evaluation of liver recipient  
42 Autotransplantation of heart  
43 Anesthesia for liver transplant  
44 Entire transplanted heart  
45 Chronic kidney disease stage 5 with transplant  
46 Acute rejection of pancreas transplant  
47 Complication of transplanted heart  
48 Ultrasound scan of transplant pancreas  
49 Structure of transplanted heart  
50 Heart transplant biopsy

1 Post transplant lymphoproliferative disorder  
2 Arteriosclerosis of coronary artery bypass graft of transplanted heart  
3 Cardiothoracic transplantation service  
4 Fluoroscopy guided percutaneous transjugular biopsy of transplanted liver  
5 Disorder of transplanted kidney  
6 [V]Heart and lungs transplant status  
7 Auxiliary heart transplant  
8 Orthotopic transplantation of liver  
9 Transplantation of kidney regime  
10 [V]Heart transplanted  
11 Kidney transplant with complication  
12 [V]Transplanted organ or tissue  
13 [V]Transplanted organ  
14 [X]Failure & rejection of other transplanted organ & tissue  
15 Organ transplant with complication  
16 Transplantation of liver NOS  
17 Transplantation of pancreas NOS  
18 Cardiothoracic transplantation  
19 Transplantation surgery  
20 Orthotopic transplantation of whole liver  
21 Chronic rejection of renal transplant - grade 1  
22 Chronic rejection of renal transplant - grade III  
23 Excision of rejected transplanted kidney  
24 Transplanted organ rejection  
25 Transplantation of tail of pancreas  
26 Transplantation of kidney  
27 Doppler ultrasound of transplanted kidney  
28 Ultrasound guided insertion of nephrostomy tube into transplanted kidney  
29 Doppler ultrasound of transplanted liver  
30 Structure of transplanted pancreas  
31 Ultrasound scan of transplant kidney  
32 Transplant renal vein thrombosis  
33 Hyperacute rejection of liver transplant  
34 Specimen from transplanted kidney obtained by biopsy  
35 Hyperacute rejection of lung transplant  
36 Chronic rejection of pancreas transplant  
37 Doppler ultrasonography of blood vessel of organ transplant  
38 Accelerated coronary artery disease in transplanted heart  
39 [V]Liver transplanted  
40 Examination of recipient after kidney transplant  
41 Heterotopic liver transplant  
42 Fluoroscopic angiography of renal transplant  
43 Fluoroscopy guided insertion of nephrostomy tube into transplanted kidney  
44 Recurrent post-transplant renal disease  
45 Removal of nephrostomy tube from transplanted kidney using fluoroscopic guidance  
46 Solid organ transplant  
47 End stage renal failure with renal transplant  
48 Doppler ultrasonography of transplanted kidney  
49 Radioisotope hepatobiliary function study with stimulation post transplant  
50 Fluoroscopic venogram of transplanted pancreas using contrast



1 Post-transplant neoplasia  
2 Transplanted heart present  
3 Corneal transplant  
4 Moderate chronic transplant nephropathy  
5 Transplantation of islet cells  
6 Piggy-back heart transplant  
7 Heart-lung transplant with recipient cardiectomy-pneumonectomy  
8 Heart and lung transplant  
9 Removal of transplanted kidney  
10 [V]Lung transplanted  
11 Organ transplant with complication  
12 Other specified transplantation of lung  
13 Transplantation of lung NOS  
14 Other specified transplantation of heart and lung  
15 Aneurysm of vein of transplanted kidney  
16 Thrombosis of vein of transplanted kidney  
17 Antegrade insertion of ureteric stent into ureter of transplanted kidney using fluoroscopic guidance  
18 Accelerated rejection of renal transplant  
19 Excision of transplanted pancreas  
20 Transplantation of liver  
21 Transplantation surgery  
22 Transplanted organ failure  
23 Normal renal function of transplanted kidney  
24 Anaesthesia for liver transplant  
25 US scan of transplant kidney  
26 US doppler scan of transplanted kidney  
27 Bronchus transplantation  
28 Post-transplant lymphoproliferative disorder  
29 Doppler ultrasound scan of transplanted liver  
30 Transplantation of single lobe of lung  
31 Transplanted liver present  
32 Polymorphic lymphoproliferative disorder following transplant  
33 Transplanted organ  
34 MRI angiogram of transplanted liver  
35 Fluoroscopy and angioplasty of renal transplant  
36 Pleura transplantation  
37 Entire transplanted cornea  
38 Accelerated rejection of liver transplant  
39 Post-lung transplantation bronchiectasis  
40 Heart transplant recipient  
41 Doppler ultrasonography of transplanted liver  
42 Doppler ultrasound of transplant liver  
43 Fluoroscopy guided antegrade insertion of stent into ureter of transplanted kidney  
44 Hyperacute rejection of cardiac transplant  
45 Vesicoureteric reflux after renal transplant  
46 Ultrasonography guided biopsy of transplanted kidney  
47 Renal artery stenosis of transplanted kidney  
48 Part organ pancreatic transplant  
49 Post transplant lymphoproliferative disorder  
50 Orthotopic liver transplant



1 Autotransplantation of kidney  
2 Live donor renal allotransplant  
3 Hypertension associated with transplantation  
4 Fluoroscopic angioplasty of renal transplant  
5 Renal autotransplantation  
6 Corneal transplant  
7 CTx - Cardiac transplant  
8 [X]Renal tubulo-interstitial disorders/transplant rejection  
9 Autotransplant of kidney  
10 Auxillary liver transplant  
11 OS interventions associated with transplantation of kidney  
12 Transplanted organ complication NOS  
13 Xenotransplantation of heart  
14 Transplantation of kidney from cadaver  
15 Other specified transplantation of liver  
16 Aneurysm of artery of transplanted kidney  
17 Thrombosis of artery of transplanted kidney  
18 [RFC] Renal transplant  
19 Allotransplantation of kidney from live donor  
20 Acute rejection of renal transplant - grade II  
21 Ultrasonography of transplanted kidney with contrast  
22 Transplanted liver  
23 Transplant glomerulopathy  
24 Acute rejection of cardiac transplant  
25 Chronic rejection of lung transplant  
26 Autologous transplantation of pancreatic islet cells  
27 Radionuclide study of transplanted kidney  
28 Laparoscopic biopsy of transplanted kidney  
29 Entire transplant kidney  
30 Renal tubulo-interstitial disorders in transplant rejection  
31 Entire transplanted pancreas  
32 Lung transplant biopsy sample  
33 Ultrasonography guided biopsy of transplanted liver  
34 CT guided biopsy of transplanted liver  
35 Transplant glomerulopathy - early form  
36 Complication of transplanted kidney  
37 Fluoroscopic angiogram of transplanted liver  
38 Fluoroscopy guided removal of nephrostomy tube from transplanted kidney  
39 Entire transplanted liver  
40 [V]Heart transplanted  
41 Entire transplanted kidney  
42 Fluoroscopy guided percutaneous transhepatic transplantation of pancreatic islet cell  
43 History of renal transplant  
44 Eye structure transplantation  
45 Live donor renal transplant  
46 Allotransplantation of kidney from beating heart cadaver  
47 Percutaneous thrombolysis of vein of transplanted pancreas using fluoroscopic guidance  
48 Accelerated rejection of lung transplant  
49 Tissue specimen from transplanted kidney  
50 Other transplantation of heart

1 History of lung transplant  
2 Kidney transplantation  
3 Cadaveric heart transplant  
4 Heterotopic allotransplant of heart  
5 Allotransplant of heart  
6 Cadaver renal allotransplant  
7 Bronchiolitis obliterans syndrome after lung transplantation  
8 HtTx - Heart transplant  
9 Allotransplantation of kidney with DCD (donation after cardiac death)  
10 Heart transplantation  
11 Post-transplantation of kidney examination of recipient  
12 Allotransplantation of heart and lung  
13 Heart transplant with complication  
14 Orthotopic transplantation of liver NEC  
15 Transplantation of heart and lung  
16 Rupture of vein of transplanted kidney  
17 Stenosis of vein of transplanted kidney  
18 Post-transplant bronchiolitis obliterans syndrome  
19 Complication of transplanted lung  
20 Liver transplant  
21 Piggyback transplantation of heart  
22 Cardiothoracic transplantation  
23 Complication of transplanted lung  
24 Transplantation of pancreas and duodenum  
25 Transplantation of whole pancreas  
26 Revision of transplantation of heart and lung  
27 Transplant rejection  
28 Liver transplant failure and rejection  
29 Xenograft renal transplant  
30 Chronic rejection of renal transplant - grade II  
31 De novo transplant disease  
32 Complication of transplanted pancreas  
33 Transplantation of adrenal gland  
34 Hypertension secondary to kidney transplant  
35 Allotransplantation of left kidney  
36 Transluminal right ventricular biopsy after heart transplant  
37 Accelerated rejection of cardiac transplant  
38 Fluoroscopy guided antegrade insertion of ureteric stent into ureter of transplanted kidney  
39 [V]Cornea transplanted  
40 [V]Transplanted organ or tissue  
41 Liver transplant with recipient hepatectomy  
42 Anesthesia for heart transplant  
43 Biopsy of transplanted kidney using ultrasound guidance  
44 History of islet cell transplant  
45 Pre-existing disease in renal transplant  
46 Autotransplant of lung  
47 Structure of transplanted pancreatic islets  
48 CT of transplanted liver with contrast  
49 Total pancreatectomy with transplantation  
50 Magnetic resonance angiography of transplanted liver

1 Specimen from transplanted lung obtained by biopsy  
2 Heart-lung transplant recipient  
3 Transplant of kidney using robotic assistance  
4 MRI of transplanted liver  
5 US scan of transplant liver  
6 Heart transplant with recipient cardiectomy  
7 [V]Transplanted organ  
8 Ultrasound scan of transplanted kidney with contrast  
9 Acute rejection of liver transplant  
10 Allotransplantation of islets of Langerhans  
11 Fluoroscopy guided retrograde insertion of ureteric stent into ureter of transplanted kidney  
12 Disorder related to cardiac transplantation  
13 Orthotopic allotransplant of heart  
14 Renal transplant arteriogram  
15 Post-renal transplant vesicoureteric reflux  
16 Entire renal artery of transplanted kidney  
17 Renal homotransplantation with unilateral recipient nephrectomy  
18 [X]Surgical operation with transplant of whole organ as the cause of abnormal reaction of the patient  
19 Transplanted organ complication  
20 Allotransplantation of kidney from cadaver NEC  
21 HTx - Heart transplant  
22 Pancreatic transplant  
23 Transplanted pancreas pancreatectomy  
24 Transplant of kidney  
25 Fluoroscopic angioplasty of transplanted liver  
26 HLTx - Heart lung transplant  
27 Cornea transplant recipient  
28 Severe chronic transplant nephropathy  
29 Auxiliary liver transplant  
30 Disorder affecting transplanted structure  
31 Liver transplant with complication  
32 Other specified transplantation of pancreas  
33 Allotransplantation of heart NEC  
34 Revision of transplantation of heart NEC  
35 Other transplantation of heart NOS  
36 Under regular review by lung transplant unit  
37 Lung transplant  
38 Interventions associated with transplantation of kidney  
39 Transplant immunosuppression  
40 Acute rejection of renal transplant  
41 Acute rejection of renal transplant - grade III  
42 Chronic rejection of renal transplant  
43 Renal transplant biopsy sample  
44 Live donor liver transplant  
45 Ultrasonography guided insertion of nephrostomy tube into transplanted kidney  
46 Coronary arteriosclerosis in native artery of transplanted heart  
47 Liver transplant disorder  
48 Transplantation of heart  
49 History of heart recipient  
50 H/O: heart recipient

1 History of - lung recipient  
2 H/O: lung recipient  
3 H/O: kidney recipient  
4 History of - kidney recipient  
5 H/O: liver recipient  
6 History of liver recipient  
7 Autologous peripheral blood stem cell transplant  
8 Allogeneic peripheral blood stem cell transplant  
9 History of peripheral stem cell transplant  
10 Limbal stem cell allograft transplantation  
11 Peripheral blood stem cell transplantation  
12 Hemopoietic stem cell transplant  
13 Haemopoietic stem cell transplant  
14 Limbal stem cell transplantation  
15 Syngeneic peripheral blood stem cell transplant  
16 Syngeneic peripheral blood stem cell transplantation  
17 Immune system transplantation  
18 Transplantation of stem cells  
19 Transplantation of autologous hematopoietic stem cell  
20 Transplantation of autologous haematopoietic stem cell  
21 Allogeneic bone marrow graft  
22 Grafting of bone marrow using allograft from unmatched unrelated donor  
23 Syngeneic bone marrow graft  
24 Allogeneic related bone marrow graft  
25 T-cell depleted allogeneic bone marrow graft  
26 Rejection of bone marrow graft  
27 Bone marrow graft  
28 Autologous bone marrow graft  
29 Failed bone marrow transplant engraftment  
30 Failure of bone marrow graft  
31 Allogeneic unrelated bone marrow graft  
32 Imperfect T-cell depleted allogeneic bone marrow graft  
33 Allograft of bone marrow from matched unrelated donor  
34 Graft of cord blood to bone marrow  
35 Allograft of bone marrow from unmatched unrelated donor  
36 Graft of bone marrow NOS  
37 Chronic graft versus host disease after transplantation of bone marrow  
38 Other specified graft of bone marrow  
39 Allograft of bone marrow from sibling donor  
40 Grafting of bone marrow NOS  
41 Graft of bone marrow NOS  
42 Other specified graft of cord blood to bone marrow  
43 Allograft of bone marrow from haploidentical donor  
44 Allograft of cord blood to bone marrow  
45 Allograft of bone marrow NEC  
46 Graft of cord blood to bone marrow NOS  
47 Grafting of cord blood to bone marrow  
48 Autograft of bone marrow  
49 PBSC - Peripheral blood stem cell graft  
50 Peripheral blood stem cell graft

1 Bone marrow: myeloma cells  
2 Immunoproliferative neoplasm or myeloma NOS  
3 Myelomonocytic leukaemia  
4 Subacute myelomonocytic leukaemia  
5 Osteoporosis in multiple myelomatosis  
6 Kahler's disease  
7 Myelomatosis  
8 Multiple myeloma  
9 Lambda light chain myeloma  
10 Chronic myelomonocytic leukaemia  
11 [M]Acute myelomonocytic leukaemia  
12 [M]Plasma cell myeloma  
13 Juvenile myelomonocytic leukaemia  
14 Solitary myeloma  
15 Chronic myelomonocytic leukaemia  
16 [M]Monostotic myeloma  
17 [M]Multiple myeloma  
18 [M]Myeloma NOS  
19 [M]Myelomatosis  
20 [M]Plasmacytic myeloma  
21 [M]Solitary myeloma  
22 M4 - Acute myelomonocytic leukaemia  
23 Myeloma - solitary  
24 Multiple myeloma and immunoproliferative neoplasms  
25 Multiple myeloma etc.  
26 [RFC] Multiple myeloma  
27 Juvenile myelomonocytic leukaemia  
28 Acute myelomonocytic leukaemia  
29 Myeloma kidney  
30 Myelomalacia  
31 Myelomonocytic leukaemia  
32 Multiple myeloma  
33 Plasma cell myeloma  
34 Myeloma  
35 Multiple myeloma, no International Classification of Diseases for Oncology subtype  
36 Plasmacytic myeloma  
37 Myeloma  
38 AMML - Acute myelomonocytic leukaemia  
39 Chronic myelomonocytic leukemia  
40 Light chain myeloma  
41 Non-secretory myeloma  
42 Myeloma screening  
43 IgA myeloma  
44 IgG myeloma  
45 Immunoglobulin G myeloma  
46 IgD myeloma  
47 Plasma cell myeloma/plasmacytoma  
48 Smouldering myeloma  
49 Kappa light chain myeloma  
50 Plasma cell myeloma/plasmacytoma

1 Solitary osseous myeloma  
2 Monostotic myeloma  
3 Asymptomatic multiple myeloma  
4 Asymptomatic myeloma  
5 Indolent multiple myeloma  
6 History of multiple myeloma  
7 Chronic myelomonocytic leukaemia  
8 Chronic myelomonocytic leukaemia  
9 Chronic myelomonocytic leukemia  
10 Chronic lymphoid leukaemia  
11 Lymphatic leukaemia  
12 Lymphoid leukaemia  
13 Subacute lymphoid leukaemia  
14 Other lymphoid leukaemia  
15 Aleukaemic lymphoid leukaemia  
16 Other lymphoid leukaemia NOS  
17 Lymphoid leukaemia NOS  
18 [M]Lymphoid leukaemias  
19 Acute lymphoblastic leukaemia - category  
20 [M]Subacute lymphoid leukaemia  
21 [M]Aleukaemic lymphoid leukaemia  
22 [M]Lymphosarcoma cell leukaemia  
23 [M]Lymphosarcoma cell leukaemia NOS  
24 [X]Other lymphoid leukaemia  
25 B-cell chronic lymphocytic leukaemia  
26 T-cell prolymphocytic leukaemia  
27 B-cell acute lymphoblastic leukaemia  
28 B-cell prolymphocytic leukaemia  
29 Acute lymphoid leukaemia  
30 [M]Prolymphocytic leukaemia  
31 [V]Personal history of lymphoid leukaemia  
32 [M]Lymphoid leukaemia NOS  
33 Prolymphocytic leukaemia  
34 Chronic lymphoid leukaemia  
35 [M]Lymphatic leukaemia  
36 [M]Lymphosarcoma cell leukaemias  
37 Lymphoid leukaemia  
38 Chronic lymphoid leukaemia, disease  
39 Lymphosarcoma cell leukaemia  
40 Lymphoid leukaemia - acute  
41 Lymphoid leukaemia - chronic  
42 Lymphoid leukaemia - subacute  
43 Prolymphocytic leukemia of T-cell type  
44 Prolymphocytic leukaemia of B-cell type  
45 Chronic lymphocytic leukaemia of B-cell type  
46 Clinical stage A chronic lymphocytic leukaemia  
47 Clinical stage B chronic lymphocytic leukaemia  
48 Clinical stage C chronic lymphocytic leukaemia  
49 Lymphocytic leukemia  
50 Lymphocytic leukaemia

1  
2 Chronic lymphocytic leukaemia  
3 Chronic lymphocytic leukemia  
4 Chronic lymphoid leukemia  
5 Chronic lymphatic leukemia  
6 Chronic lymphatic leukaemia  
7  
8 Chronic lymphocytic leukaemia, B-cell type  
9 Acute lymphoid leukemia  
10 ALL - Acute lymphoblastic leukaemia  
11 CLL - Chronic lymphocytic leukaemia  
12 CLL - Chronic lymphocytic leukemia  
13 Prolymphocytic leukemia, T-cell type  
14 Acute lymphoblastic leukemia  
15 Lymphoblastic leukaemia  
16 Acute lymphocytic leukaemia  
17 Acute lymphoblastic leukaemia  
18 Prolymphocytic leukaemia  
19 Lymphoid leukaemia (category)  
20 Subacute lymphoid leukemia  
21 B-CLL - B-cell chronic lymphocytic leukemia  
22 B-CLL - B-cell chronic lymphocytic leukaemia  
23 T-cell chronic lymphocytic leukaemia  
24 Chronic lymphocytic prolymphocytic leukaemia syndrome  
25 Large granular lymphocytic leukaemia  
26 LGLL - Large granular lymphocytic leukemia  
27 B-cell acute lymphoblastic leukemia  
28 Pre B-cell acute lymphoblastic leukaemia  
29 Common acute lymphoblastic leukaemia  
30 T-cell acute lymphoblastic leukaemia  
31 Acute lymphoblastic leukaemia, transitional pre-B-cell  
32 Leukaemic infiltration of skin (T-cell lymphoblastic leukaemia)  
33 Philadelphia chromosome-positive acute lymphoblastic leukaemia  
34 Philadelphia chromosome-positive acute lymphoblastic leukemia  
35 Smouldering chronic lymphocytic leukaemia  
36 T-cell large granular lymphocytic leukaemia  
37 Philadelphia chromosome-negative precursor B-cell acute lymphoblastic leukaemia  
38 B lymphoblastic leukaemia lymphoma with t(9;22) (q34;q11.2); BCR-ABL 1  
39 Chronic lymphocytic leukaemia genetic mutation variant  
40 Acute lymphoid leukaemia relapse  
41 History of chronic lymphocytic leukaemia  
42 Monoclonal B-cell lymphocytosis chronic lymphocytic leukaemia-type  
43 B lymphoblastic leukaemia lymphoma with t(5;14)(q31;q32); IL3-IGH  
44 Precursor B-cell acute lymphoblastic leukaemia  
45 Other types of follicular non-Hodgkin's lymphoma  
46 [X]Other types of follicular non-Hodgkin's lymphoma  
47 Follicular non-Hodgkin's small cleaved cell lymphoma  
48 Follicular non-Hodgkin's large cell lymphoma  
49 Follicular non-Hodgkin's lymphoma  
50 Diffuse follicle centre lymphoma  
51 Paediatric follicular lymphoma  
52 [M]Follicular lymphosarcoma NOS

1 [M]Giant follicular lymphoma  
2 Follicular lymphoma NOS  
3 Follicular non-Hodgkin's mixed small cleaved and large cell lymphoma  
4 Follicular lymphoma  
5 Follicular lymphoma grade 1  
6 Follicular lymphoma grade 2  
7 Follicular lymphoma grade 3  
8 Follicular lymphoma, cutaneous follicle centre  
9 Other types of follicular lymphoma  
10 Other non-follicular lymphoma  
11 Follicular lymphoma grade 3a  
12 Follicular lymphoma grade 3b  
13 Cutaneous follicle centre lymphoma  
14 Follicular lymphoma, grade 3  
15 Follicular lymphoma, grade 2  
16 Follicular lymphoma  
17 Follicular non-Hodgkin's lymphoma, mixed small cleaved cell and large cell (clinical)  
18 Follicular lymphoma grade 2  
19 Follicular non-Hodgkin's lymphoma, large cell (clinical)  
20 Follicular low grade B-cell lymphoma  
21 Follicular malignant lymphoma - mixed cell type  
22 Follicular malignant lymphoma - small cleaved cell  
23 Follicular malignant lymphoma - large cell  
24 Follicular non-Hodgkin lymphoma  
25 Primary cutaneous follicular centre B-cell lymphoma  
26 Primary cutaneous follicle centre cell lymphoma  
27 Primary cutaneous follicle center cell lymphoma  
28 Follicular non-Hodgkin's lymphoma of soft tissue  
29 Follicular non-Hodgkin's lymphoma of lung  
30 Follicular non-Hodgkin's lymphoma of skin  
31 Follicular non-Hodgkin's lymphoma of intestine  
32 Follicular non-Hodgkin's lymphoma diffuse follicle centre sub-type grade 1  
33 Follicular non-Hodgkin's lymphoma diffuse follicle centre cell sub-type grade 2  
34 Follicular non-Hodgkin's lymphoma of lymph nodes of multiple sites  
35 Acquired human immunodeficiency virus infection syndrome NOS  
36 Eczema, thrombocytopenia, immunodeficiency syndrome  
37 Acquired immunodeficiency syndrome  
38  
39  
40  
41  
42  
43  
44  
45  
46  
47  
48  
49  
50  
51  
52  
53  
54  
55  
56  
57  
58  
59  
60



1  
2  
3  
4  
5  
6  
7  
8  
9  
10  
11  
12  
13  
14  
15  
16  
17  
18  
19  
20  
21  
22  
23  
24  
25  
26  
27  
28  
29  
30  
31  
32  
33  
34  
35  
36  
37  
38  
39  
40  
41  
42  
43  
44  
45  
46  
47  
48  
49  
50  
51  
52  
53  
54  
55  
56  
57  
58  
59  
60

For peer review only

1  
2  
3  
4  
5  
6  
7  
8  
9  
10  
11  
12  
13  
14  
15  
16  
17  
18  
19  
20  
21  
22  
23  
24  
25  
26  
27  
28  
29  
30  
31  
32  
33  
34  
35  
36  
37  
38  
39  
40  
41  
42  
43  
44  
45  
46  
47  
48  
49  
50  
51  
52  
53  
54  
55  
56  
57  
58  
59  
60

For peer review only

1  
2  
3  
4  
5  
6  
7  
8  
9  
10  
11  
12  
13  
14  
15  
16  
17  
18  
19  
20  
21  
22  
23  
24  
25  
26  
27  
28  
29  
30  
31  
32  
33  
34  
35  
36  
37  
38  
39  
40  
41  
42  
43  
44  
45  
46  
47  
48  
49  
50  
51  
52  
53  
54  
55  
56  
57  
58  
59  
60

For peer review only

1  
2  
3  
4  
5  
6  
7  
8  
9  
10  
11  
12  
13  
14  
15  
16  
17  
18  
19  
20  
21  
22  
23  
24  
25  
26  
27  
28  
29  
30  
31  
32  
33  
34  
35  
36  
37  
38  
39  
40  
41  
42  
43  
44  
45  
46  
47  
48  
49  
50  
51  
52  
53  
54  
55  
56  
57  
58  
59  
60

For peer review only

1  
2  
3  
4  
5  
6  
7  
8  
9  
10  
11  
12  
13  
14  
15  
16  
17  
18  
19  
20  
21  
22  
23  
24  
25  
26  
27  
28  
29  
30  
31  
32  
33  
34  
35  
36  
37  
38  
39  
40  
41  
42  
43  
44  
45  
46  
47  
48  
49  
50  
51  
52  
53  
54  
55  
56  
57  
58  
59  
60

For peer review only

1  
2  
3  
4  
5  
6  
7  
8  
9  
10  
11  
12  
13  
14  
15  
16  
17  
18  
19  
20  
21  
22  
23  
24  
25  
26  
27  
28  
29  
30  
31  
32  
33  
34  
35  
36  
37  
38  
39  
40  
41  
42  
43  
44  
45  
46  
47  
48  
49  
50  
51  
52  
53  
54  
55  
56  
57  
58  
59  
60

For peer review only

1  
2  
3  
4  
5  
6  
7  
8  
9  
10  
11  
12  
13  
14  
15  
16  
17  
18  
19  
20  
21  
22  
23  
24  
25  
26  
27  
28  
29  
30  
31  
32  
33  
34  
35  
36  
37  
38  
39  
40  
41  
42  
43  
44  
45  
46  
47  
48  
49  
50  
51  
52  
53  
54  
55  
56  
57  
58  
59  
60

For peer review only

1  
2  
3  
4  
5  
6  
7  
8  
9  
10  
11  
12  
13  
14  
15  
16  
17  
18  
19  
20  
21  
22  
23  
24  
25  
26  
27  
28  
29  
30  
31  
32  
33  
34  
35  
36  
37  
38  
39  
40  
41  
42  
43  
44  
45  
46  
47  
48  
49  
50  
51  
52  
53  
54  
55  
56  
57  
58  
59  
60

For peer review only



1  
2  
3  
4  
5  
6  
7  
8  
9  
10  
11  
12  
13  
14  
15  
16  
17  
18  
19  
20  
21  
22  
23  
24  
25  
26  
27  
28  
29  
30  
31  
32  
33  
34  
35  
36  
37  
38  
39  
40  
41  
42  
43  
44  
45  
46  
47  
48  
49  
50  
51  
52  
53  
54  
55  
56  
57  
58  
59  
60

For peer review only

1  
2  
3  
4  
5  
6  
7  
8  
9  
10  
11  
12  
13  
14  
15  
16  
17  
18  
19  
20  
21  
22  
23  
24  
25  
26  
27  
28  
29  
30  
31  
32  
33  
34  
35  
36  
37  
38  
39  
40  
41  
42  
43  
44  
45  
46  
47  
48  
49  
50  
51  
52  
53  
54  
55  
56  
57  
58  
59  
60

For peer review only

1  
2  
3  
4  
5  
6  
7  
8  
9  
10  
11  
12  
13  
14  
15  
16  
17  
18  
19  
20  
21  
22  
23  
24  
25  
26  
27  
28  
29  
30  
31  
32  
33  
34  
35  
36  
37  
38  
39  
40  
41  
42  
43  
44  
45  
46  
47  
48  
49  
50  
51  
52  
53  
54  
55  
56  
57  
58  
59  
60

For peer review only

1  
2  
3  
4  
5  
6  
7  
8  
9  
10  
11  
12  
13  
14  
15  
16  
17  
18  
19  
20  
21  
22  
23  
24  
25  
26  
27  
28  
29  
30  
31  
32  
33  
34  
35  
36  
37  
38  
39  
40  
41  
42  
43  
44  
45  
46  
47  
48  
49  
50  
51  
52  
53  
54  
55  
56  
57  
58  
59  
60

ay

For peer review only

|    |             |
|----|-------------|
| 1  |             |
| 2  | ICD-10 code |
| 3  | B20         |
| 4  | B20.0       |
| 5  | B20.1       |
| 6  | B20.2       |
| 7  | B20.3       |
| 8  | B20.4       |
| 9  | B20.5       |
| 10 | B20.6       |
| 11 | B20.7       |
| 12 | B20.8       |
| 13 | B20.9       |
| 14 | B21         |
| 15 | B21.0       |
| 16 | B21.1       |
| 17 | B21.2       |
| 18 | B21.3       |
| 19 | B21.7       |
| 20 | B21.8       |
| 21 | B21.9       |
| 22 | B22         |
| 23 | B22.0       |
| 24 | B22.1       |
| 25 | B22.2       |
| 26 | B22.7       |
| 27 | B23         |
| 28 | B23.0       |
| 29 | B23.1       |
| 30 | B23.2       |
| 31 | B23.8       |
| 32 | B24         |
| 33 | Z21         |
| 34 | O98.7       |
| 35 | R75         |
| 36 | Z71.7       |
| 37 | Z94.0       |
| 38 | Z94.1       |
| 39 | Z94.2       |
| 40 | Z94.3       |
| 41 | Z94.4       |
| 42 | Z94.6       |
| 43 | Z94.7       |
| 44 | Z94.8       |
| 45 | Z94.9       |
| 46 | C90         |
| 47 | C90.0       |
| 48 | C93.1       |
| 49 | C93.10      |
| 50 | C93.11      |
| 51 | C93.12      |

For peer review only

1  
2 C91.1  
3 C91.10  
4 C91.11  
5 C91.12  
6 C82  
7 C82.0  
8 C82.1  
9 C82.2  
10 C82.3  
11 C82.4  
12 C82.5  
13 C82.6  
14 C82.7  
15 C82.9  
16  
17  
18  
19  
20  
21  
22  
23  
24  
25  
26  
27  
28  
29  
30  
31  
32  
33  
34  
35  
36  
37  
38  
39  
40  
41  
42  
43  
44  
45  
46  
47  
48  
49  
50  
51  
52  
53  
54  
55  
56  
57  
58  
59  
60

For peer review only

|    |                                                                                                   |
|----|---------------------------------------------------------------------------------------------------|
| 1  |                                                                                                   |
| 2  | Term                                                                                              |
| 3  | Human immunodeficiency virus [HIV] disease resulting in infectious and parasitic diseases         |
| 4  | HIV disease resulting in mycobacterial infection                                                  |
| 5  | HIV disease resulting in other bacterial infections                                               |
| 6  | HIV disease resulting in cytomegaloviral disease                                                  |
| 7  | HIV disease resulting in other viral infections                                                   |
| 8  | HIV disease resulting in candidiasis                                                              |
| 9  | HIV disease resulting in other mycoses                                                            |
| 10 | HIV disease resulting in Pneumocystis jirovecii pneumonia                                         |
| 11 | HIV disease resulting in multiple infections                                                      |
| 12 | HIV disease resulting in other infectious and parasitic diseases                                  |
| 13 | HIV disease resulting in unspecified infectious or parasitic disease                              |
| 14 | Human immunodeficiency virus [HIV] disease resulting in malignant neoplasms                       |
| 15 | HIV disease resulting in Kaposi sarcoma                                                           |
| 16 | HIV disease resulting in Burkitt lymphoma                                                         |
| 17 | HIV disease resulting in other types of non-Hodgkin lymphoma                                      |
| 18 | HIV disease resulting in other malignant neoplasms of lymphoid, haematopoietic and related tissue |
| 19 | HIV disease resulting in multiple malignant neoplasms                                             |
| 20 | HIV disease resulting in other malignant neoplasms                                                |
| 21 | HIV disease resulting in unspecified malignant neoplasm                                           |
| 22 | Human immunodeficiency virus [HIV] disease resulting in other specified diseases                  |
| 23 | HIV disease resulting in encephalopathy                                                           |
| 24 | HIV disease resulting in lymphoid interstitial pneumonitis                                        |
| 25 | HIV disease resulting in wasting syndrome                                                         |
| 26 | HIV disease resulting in multiple diseases classified elsewhere                                   |
| 27 | Human immunodeficiency virus [HIV] disease resulting in other conditions                          |
| 28 | Acute HIV infection syndrome                                                                      |
| 29 | HIV disease resulting in (persistent) generalized lymphadenopathy                                 |
| 30 | HIV disease resulting in haematological and immunological abnormalities, not elsewhere classified |
| 31 | HIV disease resulting in other specified conditions                                               |
| 32 | Unspecified human immunodeficiency virus [HIV] disease                                            |
| 33 | Asymptomatic human immunodeficiency virus [HIV] infection status                                  |
| 34 | Human immunodeficiency virus [HIV] disease complicating pregnancy, childbirth and the puerperium  |
| 35 | Laboratory evidence of human immunodeficiency virus [HIV]                                         |
| 36 | Human immunodeficiency virus [HIV] counselling                                                    |
| 37 | Kidney transplant status                                                                          |
| 38 | Heart transplant status                                                                           |
| 39 | Lung transplant status                                                                            |
| 40 | Heart and lungs transplant status                                                                 |
| 41 | Liver transplant status                                                                           |
| 42 | Bone transplant status                                                                            |
| 43 | Corneal transplant status                                                                         |
| 44 | Other transplanted organ and tissue status                                                        |
| 45 | Transplanted organ and tissue status, unspecified                                                 |
| 46 | Multiple myeloma and malignant plasma cell neoplasms                                              |
| 47 | Multiple myeloma                                                                                  |
| 48 | Chronic Myelomonocytic Leukaemia                                                                  |
| 49 | Chronic myelomonocytic leukemia not having achieved remission                                     |
| 50 | Chronic myelomonocytic leukemia, in remission                                                     |
| 51 | Chronic myelomonocytic leukemia, in relapse                                                       |
| 52 |                                                                                                   |
| 53 |                                                                                                   |
| 54 |                                                                                                   |
| 55 |                                                                                                   |
| 56 |                                                                                                   |
| 57 |                                                                                                   |
| 58 |                                                                                                   |
| 59 |                                                                                                   |
| 60 |                                                                                                   |

1  
2 Chronic lymphocytic leukaemia of B-cell type  
3 Chronic lymphocytic leukemia of B-cell type not having achieved remission  
4 Chronic lymphocytic leukemia of B-cell type in remission  
5 Chronic lymphocytic leukemia of B-cell type in relapse  
6 Follicular lymphoma  
7  
8 Follicular lymphoma grade I  
9 Follicular lymphoma grade II  
10 Follicular lymphoma grade III, unspecified  
11 Follicular lymphoma grade IIIa  
12 Follicular lymphoma grade IIIb  
13 Diffuse follicle centre lymphoma  
14 Cutaneous follicle centre lymphoma  
15 Other types of follicular lymphoma  
16 Follicular lymphoma, unspecified  
17  
18  
19  
20  
21  
22  
23  
24  
25  
26  
27  
28  
29  
30  
31  
32  
33  
34  
35  
36  
37  
38  
39  
40  
41  
42  
43  
44  
45  
46  
47  
48  
49  
50  
51  
52  
53  
54  
55  
56  
57  
58  
59  
60



1  
2  
3  
4  
5  
6  
7  
8  
9  
10  
11  
12  
13  
14  
15  
16  
17  
18  
19  
20  
21  
22  
23  
24  
25  
26  
27  
28  
29  
30  
31  
32  
33  
34  
35  
36  
37  
38  
39  
40  
41  
42  
43  
44  
45  
46  
47  
48  
49  
50  
51  
52  
53  
54  
55  
56  
57  
58  
59  
60

m

For peer review only

1  
2 Procodeid  
3 9851141000033117  
4 475141000033116  
5 548141000033117  
6 920741000033111  
7 391341000033118  
8 1430841000033118  
9 395141000033118  
10 8614041000033119  
11 8614141000033115  
12 256041000033110  
13 586541000033115  
14 750241000033113  
15 255941000033117  
16 255241000033114  
17 1608041000033116  
18 9850841000033118  
19 392041000033113  
20 256141000033114  
21 255141000033119  
22 391641000033114  
23 391741000033117  
24 391141000033116  
25 391541000033113  
26 391941000033119  
27 885441000033112  
28 474941000033115  
29 196141000033116  
30 1891841000033112  
31 395341000033115  
32 255741000033115  
33 391241000033111  
34 4907641000033116  
35 1891941000033116  
36 8963541000033110  
37 8963341000033115  
38 8963641000033111  
39 8963041000033117  
40 8962941000033110  
41 8963241000033113  
42 8963141000033118  
43 8963441000033114  
44 12198241000033110  
45 12198341000033117  
46 4259741000033112  
47 4259841000033119  
48 4157141000033115  
49 4157241000033110  
50 11695941000033111  
51 11696041000033118

For peer review only

1  
2 8193041000033117  
3 8193241000033113  
4 8193341000033115  
5 8193141000033118  
6 4954641000033115  
7 4954741000033112  
8 3269141000033118  
9 3268841000033118  
10 3268941000033114  
11 3269041000033117  
12 2717041000033110  
13 2717141000033114  
14 3138941000033115  
15 3139041000033112  
16 8581041000033111  
17 8581241000033115  
18 8581341000033113  
19 8581141000033110  
20 8197241000033116  
21 3083841000033118  
22 3012541000033111  
23 947341000033112  
24 3083741000033111  
25 9851041000033116  
26 11800041000033110  
27 9850741000033111  
28 11807741000033112  
29 11800141000033114  
30 11799941000033116  
31 11800241000033119  
32 11807641000033115  
33 2271141000033116  
34 9158341000033117  
35 2270941000033113  
36 2270841000033117  
37 2271041000033115  
38 196041000033115  
39 6138541000033119  
40 196941000033119  
41 1035541000033115  
42 196841000033110  
43 10955641000033118  
44 10955741000033110  
45 12037141000033115  
46 3059241000033110  
47 3059341000033117  
48 148541000033118  
49 7860141000033114  
50 7860241000033119  
51 7860341000033112

For peer review only

1  
2 7860441000033118  
3 10642541000033111  
4 10642441000033110  
5 3152841000033114  
6 3152741000033116  
7  
8 825641000033117  
9 825741000033114  
10 248341000033110  
11 248441000033116  
12  
13 3097441000033111  
14 3872441000033118  
15 3872641000033116  
16 3872941000033111  
17 3872541000033117  
18  
19 12398041000033110  
20 274741000033119  
21 822741000033117  
22 4156641000033110  
23 4156541000033114  
24 12398141000033114  
25 3952941000033115  
26 3952841000033111  
27 10974641000033119  
28 10974541000033115  
29  
30 386541000033117  
31 535541000033117  
32 8200041000033113  
33 8199841000033110  
34 8199941000033119  
35 8200141000033112  
36 523041000033113  
37 395241000033113  
38 10217041000033110  
39 4156041000033116  
40 4156141000033117  
41 390241000033116  
42 390341000033114  
43 390141000033111  
44 2090341000033111  
45 3057441000033119  
46 3898641000033113  
47 12195941000033113  
48 3057341000033113  
49 12195841000033117  
50 2090241000033118  
51 3898541000033112  
52 2090041000033114  
53 2090141000033113  
54 8947641000033114  
55 8947541000033113

For peer review only

1  
2 8947741000033117  
3 8947441000033112  
4 10388241000033111  
5 485641000033118  
6 10388341000033118  
7  
8 421941000033118  
9 423841000033110  
10 4040741000033110  
11 3857341000033112  
12 333041000033113  
13 11693941000033112  
14 11694241000033118  
15 11694041000033114  
16 11694141000033113  
17  
18 3994241000033113  
19 3994341000033115  
20 3994541000033110  
21 3994641000033111  
22 3994441000033114  
23 3994741000033119  
24 404741000033113  
25 404541000033117  
26 404641000033116  
27 8196341000033112  
28 8196241000033119  
29 4156941000033115  
30 4212641000033116  
31 4212741000033113  
32 4157041000033119  
33 9293441000033110  
34 474341000033119  
35 474441000033113  
36 6117341000033119  
37 1405941000033112  
38 10267341000033111  
39 9293541000033111  
40 6058941000033117  
41 10267541000033116  
42 5844941000033112  
43 5845241000033116  
44 6067041000033112  
45 6117141000033117  
46 1406041000033119  
47 6067141000033111  
48 6117241000033112  
49 10267441000033117  
50 5845041000033112  
51 5845141000033111  
52 4955741000033113  
53 4292641000033117

For peer review only

1 4452841000033111  
2 4374741000033117  
3 2590141000033110  
4 4452741000033118  
5 2590041000033111  
6 5845441000033115  
7 2590241000033115  
8 3964641000033114  
9 2589941000033118  
10 8838441000033117  
11 4374841000033110  
12 2038241000033112  
13 2212841000033110  
14 7877941000033115  
15 7877841000033111  
16 11667741000033115  
17 11667641000033112  
18 11667541000033111  
19 11667441000033110  
20 2746241000033110  
21 3997641000033116  
22 1073541000033119  
23 2746341000033117  
24 531841000033117  
25 531741000033110  
26 529241000033119  
27 529041000033110  
28 1073641000033118  
29 1077441000033114  
30 1073741000033110  
31 1077341000033115  
32 529341000033112  
33 6167441000033114  
34 6167541000033110  
35 3347941000033110  
36 3348041000033113  
37 3348241000033117  
38 3348141000033112  
39 540541000033112  
40 540641000033113  
41 2642041000033114  
42 547341000033118  
43 2642141000033113  
44 3983641000033110  
45 1506441000033117  
46 1506341000033111  
47 3983741000033118  
48 547541000033113  
49 4061141000033114  
50 4453741000033111

For peer review only

1  
2 1607941000033119  
3 12188941000033117  
4 6470841000033117  
5 12189441000033117  
6 12188741000033115  
7  
8 5292841000033112  
9 12189541000033116  
10 10334741000033117  
11 10334441000033112  
12 12189241000033118  
13 10334841000033110  
14 5292741000033119  
15 6471741000033117  
16 10334241000033111  
17 5292541000033110  
18 10334641000033114  
19 12189141000033113  
20 9118141000033112  
21 5292641000033111  
22 8233141000033111  
23 6471241000033111  
24 10334541000033113  
25 4374441000033112  
26 4374341000033118  
27 2258141000033111  
28 2258241000033116  
29 586441000033116  
30 579141000033110  
31 2799741000033116  
32 587041000033110  
33 2799841000033114  
34 2799641000033113  
35 2799541000033112  
36 587541000033117  
37 587141000033114  
38 5264741000033112  
39 5264641000033115  
40 11757341000033115  
41 630441000033119  
42 5976141000033112  
43 11665641000033118  
44 630641000033117  
45 11757541000033110  
46 11757441000033114  
47 11665541000033119  
48 5886241000033115  
49 630541000033118  
50 11757741000033119  
51 630341000033113  
52 11665441000033115

For peer review only

1 11757641000033111  
2 7860541000033117  
3 7860641000033116  
4 3092941000033116  
5 728841000033110  
6 10013741000033113  
7 10012941000033117  
8 749941000033114  
9 749841000033118  
10 1548941000033115  
11 1547741000033117  
12 1547941000033119  
13 749441000033116  
14 1547841000033110  
15 749341000033110  
16 1548841000033111  
17 749241000033117  
18 9703941000033112  
19 914141000033114  
20 750041000033117  
21 914041000033110  
22 750141000033118  
23 3050641000033118  
24 3050541000033119  
25 3177241000033114  
26 3177341000033116  
27 6428241000033115  
28 6428341000033113  
29 5355141000033111  
30 12185841000033116  
31 194941000033112  
32 4519141000033112  
33 775041000033114  
34 12185941000033112  
35 4519241000033117  
36 775141000033113  
37 194841000033116  
38 12330541000033110  
39 12330141000033118  
40 12330241000033113  
41 12330441000033114  
42 12330341000033115  
43 12330041000033117  
44 4522841000033118  
45 4522941000033114  
46 4188241000033115  
47 4187841000033117  
48 8839241000033114  
49 10494841000033114  
50 4187541000033119

For peer review only



1  
2 4188141000033110  
3 8839141000033119  
4 10494541000033112  
5 4187641000033118  
6 10494741000033116  
7 4187741000033110  
8 4188041000033111  
9 4187941000033113  
10 10494641000033113  
11 10488241000033116  
12 11781741000033116  
13 11781841000033114  
14 10488341000033114  
15 10488541000033119  
16 10488441000033115  
17 841641000033116  
18 841741000033113  
19 903741000033112  
20 38541000033110  
21 38641000033111  
22 901641000033116  
23 2012141000033113  
24 2012241000033118  
25 899041000033116  
26 899141000033117  
27 1495241000033117  
28 4202841000033118  
29 4957041000033116  
30 1495141000033112  
31 4202941000033114  
32 913741000033110  
33 913841000033117  
34 913941000033113  
35 914441000033118  
36 2617241000033110  
37 915041000033111  
38 914941000033111  
39 2659941000033117  
40 3922341000033115  
41 3922241000033113  
42 2157041000033111  
43 3097241000033110  
44 3097341000033117  
45 2157141000033110  
46 3097141000033115  
47 2156941000033110  
48 11492541000033114  
49 11492141000033117  
50 4269341000033118  
51 4269441000033112

For peer review only

1  
2 4507541000033111  
3 4507641000033112  
4 10213141000033116  
5 10213241000033111  
6 10212841000033117  
7 10213041000033115  
8 10492141000033113  
9 10491841000033111  
10 10491941000033115  
11 10491741000033118  
12 10371941000033118  
13 10371741000033116  
14 12352841000033112  
15 12352741000033119  
16 12043541000033115  
17 12042941000033115  
18 11580041000033110  
19 11579841000033115  
20 11579741000033113  
21 11579941000033111  
22 4011441000033117  
23 1892041000033110  
24 3870741000033112  
25 4024741000033117  
26 3870641000033115  
27 3870841000033119  
28 4024841000033110  
29 4595041000033114  
30 1892141000033114  
31 4011541000033116  
32 3870941000033110  
33 1753741000033111  
34 1029541000033115  
35 3952141000033117  
36 1404241000033119  
37 3201541000033110  
38 3201641000033111  
39 1747941000033115  
40 7680641000033112  
41 4907741000033113  
42 11822741000033116  
43 11822841000033114  
44 11822941000033118  
45 11822541000033112  
46 11823041000033111  
47 11822641000033113  
48 3859041000033118  
49 3859141000033119  
50 4429441000033119  
51 4429341000033113

For peer review only

1  
2 4806041000033116  
3 4806141000033117  
4 11275641000033114  
5 11275841000033110  
6 11275541000033113  
7 11275741000033117  
8 11275341000033118  
9 11275441000033112  
10  
11 5833241000033118  
12 5832241000033113  
13 5832141000033118  
14 5832941000033116  
15 12292141000033119  
16 12292241000033114  
17 10599341000033111  
18 10599441000033117  
19 3217241000033119  
20 4806241000033112  
21 4806341000033119  
22 3217141000033114  
23 969841000033115  
24 1052641000033112  
25 8273941000033111  
26 8886841000033113  
27 8887041000033116  
28 8887141000033117  
29 8886941000033117  
30 3270341000033118  
31 2645141000033119  
32 2645241000033114  
33 3270241000033111  
34 1112241000033113  
35 1446641000033117  
36 1152341000033114  
37 10209441000033113  
38 10209641000033110  
39 10209741000033118  
40 10209541000033114  
41 1154241000033113  
42 8840041000033112  
43 8839941000033117  
44 8123841000033116  
45 8123941000033112  
46 8123641000033117  
47 8123541000033118  
48 8124041000033114  
49 8123741000033114  
50 3944041000033114  
51 3943941000033112  
52 3949941000033114

For peer review only

1 3949841000033118  
2 3949741000033111  
3 3950241000033113  
4 3950041000033117  
5 3950141000033118  
6 11420041000033110  
7 11420141000033114  
8 11419541000033118  
9 11419841000033116  
10 2995041000033111  
11 2994941000033111  
12 5886641000033117  
13 1904741000033110  
14 1904841000033117  
15 4326541000033119  
16 1904541000033119  
17 4326341000033114  
18 4326241000033116  
19 5886441000033119  
20 5886741000033114  
21 5886941000033112  
22 1904941000033113  
23 1905141000033112  
24 5886541000033118  
25 4326441000033115  
26 5886841000033116  
27 1905041000033113  
28 1904441000033115  
29 1904641000033118  
30 4803041000033114  
31 4803241000033118  
32 6455241000033110  
33 6455441000033111  
34 6455141000033115  
35 1430541000033115  
36 6455341000033117  
37 3102541000033119  
38 818041000033111  
39 11717441000033116  
40 11717541000033115  
41 11717741000033111  
42 11717641000033119  
43 9158941000033118  
44 1446841000033116  
45 6466841000033110  
46 4608241000033117  
47 4608141000033112  
48 4608441000033116  
49 2280341000033117  
50 9159041000033110

For peer review only

1  
2 2280241000033110  
3 734641000033116  
4 8614541000033112  
5 4608341000033110  
6 10740541000033118  
7 10740241000033115  
8 10740441000033119  
9 10740341000033113  
10 2188541000033112  
11 2188441000033111  
12 9075041000033117  
13 9076141000033113  
14 9074941000033117  
15 9076041000033114  
16 1460341000033118  
17 1455041000033117  
18 2076541000033113  
19 1506241000033118  
20 1454941000033117  
21 7739541000033119  
22 7739741000033110  
23 7739841000033117  
24 7739641000033118  
25 6529941000033113  
26 6530041000033117  
27 11940041000033110  
28 11940241000033119  
29 11939841000033111  
30 11939941000033115  
31 11940141000033114  
32 11940341000033112  
33 1508741000033113  
34 3997441000033118  
35 3982941000033114  
36 3997541000033117  
37 1005441000033112  
38 1519641000033110  
39 504241000033114  
40 1518641000033118  
41 1518541000033119  
42 9104141000033115  
43 3347541000033116  
44 3347441000033117  
45 951841000033112  
46 3347741000033112  
47 9104041000033119  
48 3347641000033115  
49 951741000033119  
50 8560941000033116  
51 8561041000033114

For peer review only

1  
2 8561041000033114  
3 1822101000006117  
4 2994741000033113  
5 2994841000033115  
6 4042541000033115  
7  
8 4042641000033119  
9 6467741000033115  
10 6467841000033113  
11 11692941000033118  
12 11693041000033111  
13 11693141000033110  
14 11693241000033115  
15 12512241000033119  
16 12512541000033117  
17 12683741000033114  
18 12685541000033117  
19 12712841000033116  
20 12712941000033112  
21 12873041000033113  
22 12873141000033112  
23 12873241000033117  
24 12873341000033110  
25 12873441000033116  
26 12873541000033115  
27 12873641000033119  
28 12873741000033111  
29 13479441000033116  
30 13479841000033118  
31 13480141000033112  
32 2147041000033113  
33 2147141000033112  
34 3290341000033114  
35 3290441000033115  
36 3995941000033115  
37 3996041000033113  
38 3996141000033112  
39 4012441000033113  
40 4012541000033114  
41 5293341000033111  
42 5293541000033116  
43 6515841000033111  
44 6515941000033115  
45 11242141000033114  
46 11242241000033119  
47 12346841000033114  
48 12355441000033116  
49 12355541000033115  
50 12355641000033119  
51 12410041000033119  
52 12410141000033115

For peer review only

1  
2 1916141000033115  
3 13443641000033118  
4 13443741000033110  
5 1916241000033110  
6 10213341000033118  
7  
8 11749341000033114  
9 12886741000033110  
10 13443841000033117  
11 13443941000033113  
12 5989541000033118  
13 5989641000033117  
14 9069241000033119  
15 12378941000033116  
16 12379041000033113  
17 12379141000033112  
18 5325241000033117  
19 8298941000033110  
20 11780941000033112  
21 11781041000033119  
22 13417341000033112  
23 13417441000033118  
24 4164341000033119  
25 8233841000033117  
26 10358641000033117  
27 13058741000033112  
28 13058841000033119  
29 4164441000033113  
30 8233941000033113  
31 10358741000033114  
32 13058941000033110  
33 10371741000033116  
34 12584041000033117  
35 12584141000033118  
36 12584241000033113  
37 12584341000033115  
38 12883841000033114  
39 12883941000033118  
40 12884041000033116  
41 12884441000033113  
42 12458141000033114  
43 12458241000033119  
44 13303441000033115  
45 13303541000033119  
46 8962941000033110  
47 8963041000033117  
48 8963141000033118  
49 8963241000033113  
50 8963541000033110  
51 8193041000033117  
52 8193141000033118

For peer review only

1 9201241000033110  
2 9201341000033117  
3 9201441000033111  
4 9201541000033112  
5 8558641000033118  
6 8558741000033110  
7 8558841000033117  
8 8558941000033113  
9 8559041000033116  
10 8559141000033117  
11 8581041000033111  
12 8581141000033110  
13 12603041000033110  
14 4148941000033117  
15 4149041000033114  
16 4149141000033113  
17 10974541000033115  
18 8199841000033110  
19 8199941000033119  
20 8200141000033112  
21 9850741000033111  
22 9851041000033116  
23 11799941000033116  
24 11800041000033110  
25 11800141000033114  
26 11800241000033119  
27 11807641000033115  
28 13126841000033113  
29 3994241000033113  
30 3994341000033115  
31 3994441000033114  
32 3994641000033111  
33 4892941000033118  
34 6113641000033117  
35 6113741000033114  
36 13058541000033116  
37 13738441000033115  
38 13738541000033119  
39 3347941000033110  
40 3348041000033113  
41 3348141000033112  
42 3348241000033117  
43 4161641000033112  
44 4161741000033115  
45 13715741000033113  
46 13715841000033115  
47 5264641000033115  
48 5264741000033112  
49 1441341000033115  
50 10012941000033117

For peer review only



1  
2 10013741000033113  
3 13130641000033112  
4 13130741000033115  
5 13130841000033113  
6 13130941000033117  
7 13131241000033119  
8 13131341000033112  
9 2660841000033114  
10 2660941000033118  
11 3050541000033119  
12 3050641000033118  
13 3177241000033114  
14 3177341000033116  
15 12039041000033111  
16 13788541000033113  
17 4522841000033118  
18 10488241000033116  
19 10488341000033114  
20 10488441000033115  
21 4507541000033111  
22 4507641000033112  
23 6067941000033113  
24 6068041000033111  
25 13117941000033112  
26 5832141000033118  
27 5832241000033113  
28 5832941000033116  
29 5833241000033118  
30 3926641000033110  
31 8123541000033118  
32 8123641000033117  
33 8123741000033114  
34 8123941000033112  
35 8124041000033114  
36 10487641000033119  
37 3943941000033112  
38 3944041000033114  
39 3949741000033111  
40 3949841000033118  
41 3949941000033114  
42 3950041000033117  
43 3950141000033118  
44 3950241000033113  
45 7739541000033119  
46 7739641000033118  
47 6529941000033113  
48 6530041000033117  
49 898441000033115  
50 898541000033119  
51 898441000033115

For peer review only

1  
2 898541000033119  
3 1115741000033111  
4 1119241000033115  
5 1130741000033110  
6 1357541000033112  
7 1361441000033110  
8 1361541000033111  
9 1361641000033112  
10 1361741000033115  
11 1668541000033113  
12 2859741000033112  
13 10266841000033117  
14 11664841000033116  
15 2146441000033119  
16 2146541000033118  
17 5506241000033117  
18 5900641000033111  
19 5900741000033119  
20 5900841000033112  
21 5900941000033116  
22 6137741000033111  
23 6137841000033118  
24 10213841000033110  
25 11072141000033115  
26 11072241000033110  
27 11072341000033117  
28 12389541000033113  
29 12389641000033114  
30 12389741000033117  
31 12398241000033119  
32 12575941000033114  
33 13948241000033112  
34 8559241000033112  
35  
36  
37  
38  
39  
40  
41  
42  
43  
44  
45  
46  
47  
48  
49  
50  
51  
52  
53  
54  
55  
56  
57  
58  
59  
60

For peer review only

1  
2 Term  
3 Cometriq 20mg capsules and Cometriq 80mg capsules (Ipsen Ltd)  
4 Doxorubicin Hydrochloride Injection 50 mg  
5 Etoposide Injection 20 mg/ml  
6 Mitobronitol Tablets 125 mg  
7 Cytarabine Injection 500 mg vial  
8 Thiotepa(With Sodium Chloride And Bicarbonate) Injection 15mg vial  
9 Cyclophosphamide Tablets 10 mg  
10 Docetaxel Solution For Infusion And Diluent 20 mg/2 ml vial  
11 Docetaxel Solution For Infusion And Diluent 80 mg/8 ml vial  
12 Cisplatin Injection 450 mg/vial  
13 Fludarabine Phosphate Injection 50 mg/vial  
14 Ifosfamide Injection 500 mg vial  
15 Cisplatin Injection 150 mg/vial  
16 Cisplatin Injection 500 micrograms/ml  
17 Etoposide Phosphate Injection 100 mg/vial  
18 Cabozantinib 20mg capsules and Cabozantinib 80mg capsules  
19 Cyclophosphamide Injection 1.07 g/vial  
20 Cisplatin Injection 1 mg/ml  
21 Cisplatin Injection 10 mg/vial  
22 Cyclophosphamide Injection 214 mg/vial  
23 Cyclophosphamide Injection 535 mg/vial  
24 Cytarabine Injection 100 mg/ml  
25 Cyclophosphamide Injection 107 mg/vial  
26 Cyclophosphamide Injection  
27 Melphalan Injection 100 mg vial  
28 Doxorubicin Hydrochloride Injection 10 mg  
29 Carmustine Injection 100 mg vial  
30 Oxaliplatin Powder For Solution For Injection 50 mg/vial  
31 Cyclophosphamide 50 Tablets 50 mg  
32 Cisplatin Injection 50 mg/vial  
33 Cytarabine Injection 20 mg/ml  
34 Paclitaxel Powder For Suspension For Infusion 100 mg vial  
35 Oxaliplatin Powder For Solution For Injection 100 mg/vial  
36 Giotrif 40mg tablets (Boehringer Ingelheim Ltd)  
37 Giotrif 20mg tablets (Boehringer Ingelheim Ltd)  
38 Giotrif 50mg tablets (Boehringer Ingelheim Ltd)  
39 Afatinib 30mg tablets  
40 Afatinib 20mg tablets  
41 Afatinib 50mg tablets  
42 Afatinib 40mg tablets  
43 Giotrif 30mg tablets (Boehringer Ingelheim Ltd)  
44 Alectinib 150mg capsules  
45 Alecensa 150mg capsules (Roche Products Ltd)  
46 Amsacrine 75mg/1.5ml solution for infusion ampoules and diluent  
47 Amsidine 75mg/1.5ml solution for infusion ampoules and diluent (Eurocept International bv)  
48 Arsenic 10mg/10ml solution for infusion ampoules  
49 Trisenox 10mg/10ml concentrate for solution for infusion ampoules (Teva UK Ltd)  
50 Asparaginase 10,000unit powder for solution for infusion vials  
51 Spectrila 10,000unit powder for concentrate for solution for infusion vials (medac UK)  
52  
53  
54  
55  
56  
57  
58  
59  
60

1 Axitinib 1mg tablets  
2 Inlyta 1mg tablets (Pfizer Ltd)  
3 Inlyta 5mg tablets (Pfizer Ltd)  
4 Axitinib 5mg tablets  
5 Azacitidine 100mg powder for suspension for injection vials  
6 Vidaza 100mg powder for suspension for injection vials (Celgene Ltd)  
7 Avastin 400mg/16ml solution for infusion vials (Roche Products Ltd)  
8 Bevacizumab 100mg/4ml solution for infusion vials  
9 Bevacizumab 400mg/16ml solution for infusion vials  
10 Avastin 100mg/4ml solution for infusion vials (Roche Products Ltd)  
11 Bexarotene 75mg capsules  
12 Targretin 75mg capsules (Eisai Ltd)  
13 Bortezomib 3.5mg powder for solution for injection vials  
14 Velcade 3.5mg powder for solution for injection vials (Janssen-Cilag Ltd)  
15 Bosutinib 100mg tablets  
16 Bosulif 500mg tablets (Pfizer Ltd)  
17 Bosulif 100mg tablets (Pfizer Ltd)  
18 Bosutinib 500mg tablets  
19 Adcetris 50mg powder for concentrate for solution for infusion vials (Takeda UK Ltd)  
20 Busulfan 60mg/10ml solution for infusion ampoules  
21 Busilvex 60mg/10ml concentrate for solution for infusion ampoules (Pierre Fabre Ltd)  
22 Myleran 2mg tablets (Aspen Pharma Trading Ltd)  
23 Busulfan 2mg tablets  
24 Cometriq 20mg capsules (Ipsen Ltd)  
25 Cabozantinib 40mg tablets  
26 Cabozantinib 20mg capsules  
27 Cabometyx 60mg tablets (Ipsen Ltd)  
28 Cabometyx 20mg tablets (Ipsen Ltd)  
29 Cabozantinib 20mg tablets  
30 Cabometyx 40mg tablets (Ipsen Ltd)  
31 Cabozantinib 60mg tablets  
32 Xeloda 500mg tablets (Roche Products Ltd)  
33 Capecitabine 300mg tablets  
34 Capecitabine 500mg tablets  
35 Capecitabine 150mg tablets  
36 Xeloda 150mg tablets (Roche Products Ltd)  
37 Carboplatin 150mg/15ml solution for infusion vials  
38 Carboplatin 600mg/60ml solution for infusion vials  
39 Carboplatin 50mg/5ml solution for infusion vials  
40 Paraplatin 50mg/5ml solution for infusion vials (Bristol-Myers Squibb Pharmaceuticals Ltd)  
41 Carboplatin 450mg/45ml solution for infusion vials  
42 Carfilzomib 60mg powder for solution for infusion vials  
43 Kyprolis 60mg powder for solution for infusion vials (Amgen Ltd)  
44 Carmustine 100mg powder and solvent for solution for injection vials  
45 Carmustine 7.7mg implant  
46 Gliadel 7.7mg implant (Eisai Ltd)  
47 BiCNU 100mg powder and solvent for solution for infusion vials (Bristol-Myers Squibb Pharmaceuticals Ltd)  
48 Catumaxomab 10micrograms/0.1ml solution for infusion pre-filled syringes  
49 Catumaxomab 50micrograms/0.5ml solution for infusion pre-filled syringes  
50 Removab 10micrograms/0.1ml concentrate for solution for infusion pre-filled syringes (Neovii Biotech GmbH)

1  
2 Removab 50micrograms/0.5ml concentrate for solution for infusion pre-filled syringes (Neovii Biotech GmbH)  
3 Zykadia 150mg capsules (Novartis Pharmaceuticals UK Ltd)  
4 Ceritinib 150mg capsules  
5 Erbitux 100mg/50ml solution for infusion vials (Merck Serono Ltd)  
6 Cetuximab 100mg/50ml solution for infusion vials  
7 Leukeran 2mg tablets (Aspen Pharma Trading Ltd)  
8 Leukeran 5mg tablets (GlaxoSmithKline UK Ltd)  
9 Chlorambucil 2mg tablets  
10 Chlorambucil 5mg tablets  
11 Chlormethine 10mg solution for injection vials  
12 Cisplatin 50mg powder for solution for infusion vials  
13 Cisplatin 100mg/100ml solution for infusion vials  
14 Cisplatin 10mg/10ml solution for infusion vials  
15 Cisplatin 50mg/50ml solution for infusion vials  
16 Cladribine 10mg tablets  
17 Cladribine 10mg/10ml solution for infusion vials  
18 Leustat 10mg/10ml solution for infusion vials (Janssen-Cilag Ltd)  
19 Litak 10mg/5ml solution for injection vials (Lipomed GmbH)  
20 Cladribine 10mg/5ml solution for injection vials  
21 Mavencic 10mg tablets (Merck Serono Ltd)  
22 Evoltra 20mg/20ml concentrate for solution for infusion vials (Sanofi)  
23 Clofarabine 20mg/20ml solution for infusion vials  
24 Cotellic 20mg tablets (Roche Products Ltd)  
25 Cobimetinib 20mg tablets  
26 Crisantaspase 10,000unit powder for solution for injection vials  
27 Erwinase 10,000unit powder for solution for injection vials (EUSA Pharma Ltd)  
28 Xalkori 200mg capsules (Pfizer Ltd)  
29 Crizotinib 200mg capsules  
30 Crizotinib 250mg capsules  
31 Xalkori 250mg capsules (Pfizer Ltd)  
32 Endoxana 50mg tablets (Baxter Healthcare Ltd)  
33 Cyclophosphamide 50mg tablets  
34 Cyclophosphamide 2g powder for solution for injection vials  
35 Endoxana 500mg powder for solution for injection vials (Baxter Healthcare Ltd)  
36 Endoxana 1g powder for solution for injection vials (Baxter Healthcare Ltd)  
37 Cyclophosphamide 200mg powder for solution for injection vials  
38 Cyclophosphamide 500mg powder for solution for injection vials  
39 Cyclophosphamide 1g powder for solution for injection vials  
40 Cytarabine 2g/20ml solution for injection vials  
41 DepoCyt 50mg/5ml suspension for injection vials (Napp Pharmaceuticals Ltd)  
42 Cytarabine 500mg/5ml solution for injection vials  
43 Cytarabine 5g/50ml solution for infusion vials  
44 Cytarabine (liposomal) 50mg/5ml suspension for injection vials  
45 Cytarabine 4g/40ml solution for injection vials  
46 Cytarabine 1g/10ml solution for injection vials  
47 Cytarabine 100mg/1ml solution for injection vials  
48 Cytarabine 100mg/5ml solution for injection vials  
49 Cytarabine 500mg/25ml solution for injection vials  
50 Tafinlar 50mg capsules (Novartis Pharmaceuticals UK Ltd)  
51 Dabrafenib 75mg capsules

1 Tafinlar 75mg capsules (Novartis Pharmaceuticals UK Ltd)  
2 Dabrafenib 50mg capsules  
3 Dacarbazine 1g powder for solution for infusion vials  
4 DTIC-Dome 200mg powder for solution for injection vials (Bayer Plc)  
5 Dacarbazine 500mg powder for solution for infusion vials  
6 Dacarbazine 100mg powder for solution for injection vials  
7 Dacarbazine 200mg powder for solution for injection vials  
8 Dacarbazine 600mg powder for solution for infusion vials  
9 Dactinomycin 500microgram powder for solution for injection vials  
10 Cosmegen Lyovac 500microgram powder for solution for injection vials (Orphan Europe (UK) Ltd)  
11 Daratumumab 100mg/5ml solution for infusion vials  
12 Darzalex 400mg/20ml concentrate for solution for infusion vials (Janssen-Cilag Ltd)  
13 Daratumumab 400mg/20ml solution for infusion vials  
14 Darzalex 100mg/5ml concentrate for solution for infusion vials (Janssen-Cilag Ltd)  
15 Dasatinib 20mg tablets  
16 Dasatinib 50mg tablets  
17 Sprycel 20mg tablets (Bristol-Myers Squibb Pharmaceuticals Ltd)  
18 Sprycel 50mg tablets (Bristol-Myers Squibb Pharmaceuticals Ltd)  
19 Dasatinib 70mg tablets  
20 Sprycel 70mg tablets (Bristol-Myers Squibb Pharmaceuticals Ltd)  
21 Daunorubicin 20mg powder for solution for infusion vials  
22 DaunoXome 50mg emulsion for infusion vials (Galen Ltd)  
23 Daunorubicin (liposomal) 50mg emulsion for infusion vials  
24 Dacogen 50mg powder for concentrate for solution for infusion vials (Janssen-Cilag Ltd)  
25 Decitabine 50mg powder for solution for infusion vials  
26 Dexrazoxane 500mg powder and solvent for solution for infusion vials  
27 Dexrazoxane 500mg powder for solution for infusion vials  
28 Cardioxane 500mg powder for solution for infusion vials (Clinigen Healthcare Ltd)  
29 Savene 500mg powder for concentrate and solvent for solution for infusion vials (Clinigen Healthcare Ltd)  
30 Docetaxel 20mg/0.72ml solution for infusion vials and diluent  
31 Docetaxel 20mg/0.5ml solution for infusion vials and diluent  
32 Docetaxel 80mg/2ml solution for infusion vials and diluent  
33 Taxceus 80mg/4ml concentrate for solution for infusion vials (medac UK)  
34 Taxotere 20mg/0.5ml solution for infusion vials and diluent (Sanofi)  
35 Docetaxel 160mg/16ml solution for infusion vials  
36 Docetaxel 80mg/2.88ml solution for infusion vials and diluent  
37 Docetaxel 140mg/7ml solution for infusion vials  
38 Docetaxel 20mg/2ml solution for infusion vials  
39 Docetaxel 20mg/1ml solution for infusion vials  
40 Taxotere 80mg/4ml concentrate for solution for infusion vials (Sanofi)  
41 Docetaxel 160mg/8ml solution for infusion vials  
42 Taxceus 140mg/7ml concentrate for solution for infusion vials (medac UK)  
43 Taxotere 80mg/2ml solution for infusion vials and diluent (Sanofi)  
44 Taxotere 160mg/8ml concentrate for solution for infusion vials (Sanofi)  
45 Taxceus 20mg/1ml concentrate for solution for infusion vials (medac UK)  
46 Docetaxel 80mg/8ml solution for infusion vials  
47 Docetaxel 80mg/4ml solution for infusion vials  
48 Taxotere 20mg/1ml concentrate for solution for infusion vials (Sanofi)  
49 Doxorubicin 200mg/100ml solution for infusion vials  
50 Doxorubicin (liposomal) 50mg powder and solvent for suspension for infusion vials

- 1 Doxorubicin 50mg/25ml solution for injection Cytosafe vials (Pfizer Ltd)
- 2 Doxorubicin 10mg powder for solution for injection vials
- 3 Doxorubicin 10mg/5ml solution for injection vials
- 4 Doxorubicin 10mg/5ml solution for injection Cytosafe vials (Pfizer Ltd)
- 5 Doxorubicin Rapid Dissolution 50mg powder for solution for injection vials (Pfizer Ltd)
- 6 Doxorubicin 200mg/100ml solution for injection Cytosafe vials (Pfizer Ltd)
- 7 Doxorubicin 50mg/25ml solution for injection vials
- 8 Myocet 50mg powder and solvent for suspension for infusion vials (Teva UK Ltd)
- 9 Doxorubicin Rapid Dissolution 10mg powder for solution for injection vials (Pfizer Ltd)
- 10 Doxorubicin 50mg powder for solution for injection vials (medac UK)
- 11 Doxorubicin 50mg powder for solution for injection vials
- 12 Caelyx 20mg/10ml concentrate for solution for infusion vials (Janssen-Cilag Ltd)
- 13 Caelyx 50mg/25ml concentrate for solution for infusion vials (Janssen-Cilag Ltd)
- 14 Doxorubicin liposomal pegylated 50mg/25ml solution for infusion vials
- 15 Doxorubicin liposomal pegylated 20mg/10ml solution for infusion vials
- 16 Empliciti 400mg powder for concentrate for solution for infusion vials (Bristol-Myers Squibb Pharmaceuticals L
- 17 Empliciti 300mg powder for concentrate for solution for infusion vials (Bristol-Myers Squibb Pharmaceuticals L
- 18 Elotuzumab 400mg powder for solution for infusion vials
- 19 Elotuzumab 300mg powder for solution for infusion vials
- 20 Pharmorubicin 200mg/100ml solution for infusion Cytosafe vials (Pfizer Ltd)
- 21 Epirubicin 100mg/50ml solution for infusion vials
- 22 Pharmorubicin Rapid Dissolution 10mg powder for solution for injection vials (Pfizer Ltd)
- 23 Epirubicin 200mg/100ml solution for infusion vials
- 24 Epirubicin 50mg/25ml solution for injection vials
- 25 Epirubicin 10mg/5ml solution for injection vials
- 26 Epirubicin 20mg powder for solution for injection vials
- 27 Epirubicin 10mg powder for solution for injection vials
- 28 Pharmorubicin Rapid Dissolution 20mg powder for solution for injection vials (Pfizer Ltd)
- 29 Pharmorubicin 50mg/25ml solution for injection Cytosafe vials (Pfizer Ltd)
- 30 Pharmorubicin Rapid Dissolution 50mg powder for solution for injection vials (Pfizer Ltd)
- 31 Pharmorubicin 10mg/5ml solution for injection Cytosafe vials (Pfizer Ltd)
- 32 Epirubicin 50mg powder for solution for injection vials
- 33 Eribulin 880micrograms/2ml solution for injection vials
- 34 Halaven 0.88mg/2ml solution for injection vials (Eisai Ltd)
- 35 Erlotinib 100mg tablets
- 36 Erlotinib 150mg tablets
- 37 Tarceva 150mg tablets (Roche Products Ltd)
- 38 Tarceva 100mg tablets (Roche Products Ltd)
- 39 Estracyt 140mg capsules (Pfizer Ltd)
- 40 Estramustine 140mg capsules
- 41 Eposin 100mg/5ml concentrate for solution for infusion vials (medac UK)
- 42 Etoposide 100mg capsules
- 43 Eposin 500mg/25ml concentrate for solution for infusion vials (medac UK)
- 44 Etoposide 100mg/5ml solution for infusion vials
- 45 Vepesid 50mg capsules (Bristol-Myers Squibb Pharmaceuticals Ltd)
- 46 Vepesid 100mg capsules (Bristol-Myers Squibb Pharmaceuticals Ltd)
- 47 Etoposide 500mg/25ml solution for infusion vials
- 48 Etoposide 50mg capsules
- 49 Vepesid 100mg/5ml solution for infusion vials (Bristol-Myers Squibb Pharmaceuticals Ltd)
- 50 Etoposide 100mg powder for solution for injection vials



1 Etopophos 100mg powder for solution for injection vials (Bristol-Myers Squibb Pharmaceuticals Ltd)  
2 Everolimus 3mg dispersible tablets sugar free  
3 Everolimus 2.5mg tablets  
4 Votubia 3mg dispersible tablets (Novartis Pharmaceuticals UK Ltd)  
5 Everolimus 2mg dispersible tablets sugar free  
6 Afinitor 10mg tablets (Novartis Pharmaceuticals UK Ltd)  
7 Votubia 5mg dispersible tablets (Novartis Pharmaceuticals UK Ltd)  
8 Certican 0.5mg tablets (Novartis Pharmaceuticals UK Ltd)  
9 Everolimus 250microgram tablets  
10 Votubia 2mg dispersible tablets (Novartis Pharmaceuticals UK Ltd)  
11 Certican 0.75mg tablets (Novartis Pharmaceuticals UK Ltd)  
12 Afinitor 5mg tablets (Novartis Pharmaceuticals UK Ltd)  
13 Votubia 5mg tablets (Novartis Pharmaceuticals UK Ltd)  
14 Everolimus 500microgram tablets  
15 Everolimus 5mg tablets  
16 Certican 0.25mg tablets (Novartis Pharmaceuticals UK Ltd)  
17 Everolimus 5mg dispersible tablets sugar free  
18 Afinitor 2.5mg tablets (Novartis Pharmaceuticals UK Ltd)  
19 Everolimus 10mg tablets  
20 Votubia 10mg tablets (Novartis Pharmaceuticals UK Ltd)  
21 Votubia 2.5mg tablets (Novartis Pharmaceuticals UK Ltd)  
22 Everolimus 750microgram tablets  
23 Fludarabine phosphate 50mg/2ml solution for injection vials  
24 Fludarabine phosphate 50mg powder for solution for injection vials  
25 Fludarabine phosphate 10mg tablets  
26 Fludara 10mg tablets (Sanofi)  
27 Fludara 50mg powder for solution for injection vials (Sanofi)  
28 Fluorouracil 250mg capsules  
29 Fluorouracil 2.5g/50ml solution for infusion vials  
30 Fluorouracil 2.5g/100ml solution for infusion vials  
31 Fluorouracil 5g/100ml solution for infusion vials  
32 Fluorouracil 1g/20ml solution for injection vials  
33 Fluorouracil 500mg/10ml solution for injection vials  
34 Fluorouracil 250mg/10ml solution for injection vials  
35 Fluorouracil 500mg/20ml solution for injection vials  
36 Iressa 250mg tablets (AstraZeneca UK Ltd)  
37 Gefitinib 250mg tablets  
38 Gemcitabine 1.2g/120ml infusion bags  
39 Gemzar 200mg powder for solution for infusion vials (Eli Lilly and Company Ltd)  
40 Gemcitabine 2g powder for solution for infusion vials  
41 Gemcitabine 200mg/5ml solution for infusion vials  
42 Gemcitabine 200mg powder for solution for infusion vials  
43 Gemcitabine 1.8g/180ml infusion bags  
44 Gemcitabine 1.6g/160ml infusion bags  
45 Gemcitabine 2g/50ml solution for infusion vials  
46 Gemcitabine 1.5g powder for solution for infusion vials  
47 Gemcitabine 1g powder for solution for infusion vials  
48 Gemcitabine 2.2g/220ml infusion bags  
49 Gemzar 1g powder for solution for infusion vials (Eli Lilly and Company Ltd)  
50 Gemcitabine 1g/25ml solution for infusion vials



1 Gemcitabine 2g/200ml infusion bags  
2  
3 Teysuno 15mg/4.35mg/11.8mg capsules (Nordic Pharma Ltd)  
4 Teysuno 20mg/5.8mg/15.8mg capsules (Nordic Pharma Ltd)  
5 Hydroxycarbamide 500mg capsules  
6 Hydrea 500mg capsules (Bristol-Myers Squibb Pharmaceuticals Ltd)  
7 Imbruvica 140mg capsules (Janssen-Cilag Ltd)  
8 Ibrutinib 140mg capsules  
9  
10 Idarubicin 5mg powder for solution for injection vials  
11 Idarubicin 10mg powder for solution for injection vials  
12 Zavedos 10mg powder for solution for injection vials (Pfizer Ltd)  
13 Zavedos 10mg capsules (Pfizer Ltd)  
14 Zavedos 5mg capsules (Pfizer Ltd)  
15 Idarubicin 5mg capsules  
16 Zavedos 25mg capsules (Pfizer Ltd)  
17 Idarubicin 25mg capsules  
18 Zavedos 5mg powder for solution for injection vials (Pfizer Ltd)  
19 Idarubicin 10mg capsules  
20 Zydelig 150mg tablets (Gilead Sciences International Ltd)  
21 Mitoxana 2g powder for solution for injection vials (Baxter Healthcare Ltd)  
22 Ifosfamide 1g powder for solution for injection vials  
23 Mitoxana 1g powder for solution for injection vials (Baxter Healthcare Ltd)  
24 Ifosfamide 2g powder for solution for injection vials  
25 Glivec 400mg tablets (Novartis Pharmaceuticals UK Ltd)  
26 Imatinib 400mg tablets  
27 Imatinib 100mg tablets  
28 Glivec 100mg tablets (Novartis Pharmaceuticals UK Ltd)  
29 Yervoy 200mg/40ml concentrate for solution for infusion vials (Bristol-Myers Squibb Pharmaceuticals Ltd)  
30 Yervoy 50mg/10ml concentrate for solution for infusion vials (Bristol-Myers Squibb Pharmaceuticals Ltd)  
31 Irinotecan 500mg/25ml solution for infusion vials  
32 Irinotecan 50mg/10ml solution for infusion vials  
33 Campto 100mg/5ml concentrate for solution for infusion vials (Pfizer Ltd)  
34 Irinotecan 300mg/15ml solution for infusion vials  
35 Irinotecan 40mg/2ml solution for infusion vials  
36 Onivyde 50mg/10ml concentrate for solution for infusion vials (Baxalta UK Ltd)  
37 Campto 300mg/15ml concentrate for solution for infusion vials (Pfizer Ltd)  
38 Irinotecan 100mg/5ml solution for infusion vials  
39 Campto 40mg/2ml concentrate for solution for infusion vials (Pfizer Ltd)  
40 Ninlaro 4mg capsules (Takeda UK Ltd)  
41 Ixazomib 3mg capsules  
42 Ixazomib 4mg capsules  
43 Ninlaro 3mg capsules (Takeda UK Ltd)  
44 Ninlaro 2.3mg capsules (Takeda UK Ltd)  
45 Ixazomib 2.3mg capsules  
46 Lapatinib 250mg tablets  
47 Tyverb 250mg tablets (Novartis Pharmaceuticals UK Ltd)  
48 Revlimid 25mg capsules (Celgene Ltd)  
49 Lenalidomide 25mg capsules  
50 Revlimid 2.5mg capsules (Celgene Ltd)  
51 Revlimid 20mg capsules (Celgene Ltd)  
52 Lenalidomide 5mg capsules

1 Revlimid 15mg capsules (Celgene Ltd)  
2 Lenalidomide 2.5mg capsules  
3 Lenalidomide 7.5mg capsules  
4 Lenalidomide 10mg capsules  
5 Lenalidomide 20mg capsules  
6 Lenalidomide 15mg capsules  
7 Revlimid 10mg capsules (Celgene Ltd)  
8 Revlimid 5mg capsules (Celgene Ltd)  
9 Revlimid 7.5mg capsules (Celgene Ltd)  
10 Lenvatinib 4mg capsules  
11 Kispalyx 10mg capsules (Eisai Ltd)  
12 Kispalyx 4mg capsules (Eisai Ltd)  
13 Lenvima 4mg capsules (Eisai Ltd)  
14 Lenvima 10mg capsules (Eisai Ltd)  
15 Lenvatinib 10mg capsules  
16 Lomustine 10mg capsules  
17 Lomustine 40mg capsules  
18 Melphalan 5mg tablets  
19 Alkeran 2mg tablets (Aspen Pharma Trading Ltd)  
20 Alkeran 5mg tablets (GlaxoSmithKline UK Ltd)  
21 Melphalan 2mg tablets  
22 Melphalan 50mg powder and solvent for solution for injection vials  
23 Alkeran 50mg powder and solvent for solution for injection vials (Aspen Pharma Trading Ltd)  
24 Mesna 400mg tablets  
25 Mesna 600mg tablets  
26 Uromitexan 600mg tablets (Baxter Healthcare Ltd)  
27 Mesna 400mg/4ml solution for injection ampoules  
28 Mesna 1g/10ml solution for injection ampoules  
29 Uromitexan 400mg tablets (Baxter Healthcare Ltd)  
30 Uromitexan 400mg/4ml solution for injection ampoules (Baxter Healthcare Ltd)  
31 Mitomycin-C Kyowa 10mg powder for solution for injection vials (Kyowa Kirin Ltd)  
32 Mitomycin-C Kyowa 2mg powder for solution for injection vials (Kyowa Kirin Ltd)  
33 Mitomycin-C Kyowa 20mg powder for solution for injection vials (Kyowa Kirin Ltd)  
34 Mitomycin 10mg powder for solution for injection vials  
35 Mitomycin-C Kyowa 40mg powder for solution for injection vials (Kyowa Kirin Ltd)  
36 Mitomycin 20mg powder for solution for injection vials  
37 Mitomycin 2mg powder for solution for injection vials  
38 Mitomycin 40mg powder for solution for injection vials  
39 Lysodren 500mg tablets (HRA Pharma UK Ltd)  
40 Mitotane 500mg tablets  
41 Onkotrone 25mg/12.5ml solution for infusion vials (Baxter Healthcare Ltd)  
42 Mitoxantrone 25mg/12.5ml solution for infusion vials  
43 Mitoxantrone 30mg/15ml solution for infusion vials  
44 Onkotrone 30mg/15ml solution for infusion vials (ASTA Medica Ltd)  
45 Mitoxantrone 20mg/10ml solution for infusion vials  
46 Onkotrone 20mg/10ml solution for infusion vials (Baxter Healthcare Ltd)  
47 Portrazza 800mg/50ml concentrate for solution for infusion vials (Eli Lilly and Company Ltd)  
48 Nectinumab 800mg/50ml solution for infusion vials  
49 Nelarabine 250mg/50ml solution for infusion vials  
50 Atriance 250mg/50ml solution for infusion vials (Novartis Pharmaceuticals UK Ltd)

1 Nilotinib 200mg capsules  
2  
3 Tasigna 200mg capsules (Novartis Pharmaceuticals UK Ltd)  
4 Vargatef 100mg capsules (Boehringer Ingelheim Ltd)  
5 Vargatef 150mg capsules (Boehringer Ingelheim Ltd)  
6 Nintedanib 100mg capsules  
7 Nintedanib 150mg capsules  
8  
9 Opdivo 40mg/4ml concentrate for solution for infusion vials (Bristol-Myers Squibb Pharmaceuticals Ltd)  
10 Nivolumab 40mg/4ml solution for infusion vials  
11 Opdivo 100mg/10ml concentrate for solution for infusion vials (Bristol-Myers Squibb Pharmaceuticals Ltd)  
12 Nivolumab 100mg/10ml solution for infusion vials  
13 Lynparza 50mg capsules (AstraZeneca UK Ltd)  
14 Olaparib 50mg capsules  
15 Lartruvo 190mg/19ml concentrate for solution for infusion vials (Eli Lilly and Company Ltd)  
16 Olaratumab 190mg/19ml solution for infusion vials  
17 Lartruvo 500mg/50ml concentrate for solution for infusion vials (Eli Lilly and Company Ltd)  
18 Olaratumab 500mg/50ml solution for infusion vials  
19 Tagrisso 80mg tablets (AstraZeneca UK Ltd)  
20 Osimertinib 80mg tablets  
21 Osimertinib 40mg tablets  
22 Tagrisso 40mg tablets (AstraZeneca UK Ltd)  
23 Eloxatin 200mg/40ml concentrate for solution for infusion vials (Sanofi)  
24 Eloxatin 50mg powder for solution for infusion vials (Sanofi)  
25 Oxaliplatin 100mg/20ml solution for infusion vials  
26 Oxaliplatin 50mg powder for solution for infusion vials  
27 Oxaliplatin 50mg/10ml solution for infusion vials  
28 Eloxatin 50mg/10ml concentrate for solution for infusion vials (Sanofi)  
29 Oxaliplatin 100mg powder for solution for infusion vials  
30 Oxaliplatin 150mg powder for solution for infusion vials  
31 Eloxatin 100mg powder for solution for infusion vials (Sanofi)  
32 Oxaliplatin 200mg/40ml solution for infusion vials  
33 Eloxatin 100mg/20ml concentrate for solution for infusion vials (Sanofi)  
34 Taxol 100mg/16.7ml solution for infusion vials (Bristol-Myers Squibb Pharmaceuticals Ltd)  
35 Paclitaxel 30mg/5ml solution for infusion vials  
36 Paclitaxel 300mg/50ml solution for infusion vials  
37 Taxol 30mg/5ml solution for infusion vials (Bristol-Myers Squibb Pharmaceuticals Ltd)  
38 Paclitaxel 150mg/25ml solution for infusion vials  
39 Taxol 150mg/25ml solution for infusion vials (Bristol-Myers Squibb Pharmaceuticals Ltd)  
40 Paclitaxel 100mg/16.7ml solution for infusion vials  
41 Paclitaxel albumin 100mg powder for suspension for infusion vials  
42 Abraxane 100mg powder for suspension for infusion vials (Celgene Ltd)  
43 Palbociclib 125mg capsules  
44 Ibrance 75mg capsules (Pfizer Ltd)  
45 Ibrance 100mg capsules (Pfizer Ltd)  
46 Palbociclib 75mg capsules  
47 Ibrance 125mg capsules (Pfizer Ltd)  
48 Palbociclib 100mg capsules  
49 Palifermin 6.25mg powder for solution for injection vials  
50 Kepivance 6.25mg powder for solution for injection vials (Swedish Orphan Biovitrum Ltd)  
51 Vectibix 100mg/5ml concentrate for solution for infusion vials (Amgen Ltd)  
52 Panitumumab 100mg/5ml solution for infusion vials

1 Panitumumab 400mg/20ml solution for infusion vials  
2 Vectibix 400mg/20ml concentrate for solution for infusion vials (Amgen Ltd)  
3 Farydak 10mg capsules (Novartis Pharmaceuticals UK Ltd)  
4 Farydak 20mg capsules (Novartis Pharmaceuticals UK Ltd)  
5 Panobinostat 20mg capsules  
6 Farydak 15mg capsules (Novartis Pharmaceuticals UK Ltd)  
7 Panobinostat 10mg capsules  
8 Panobinostat 15mg capsules  
9 Votrient 400mg tablets (Novartis Pharmaceuticals UK Ltd)  
10 Pazopanib 400mg tablets  
11 Pazopanib 200mg tablets  
12 Votrient 200mg tablets (Novartis Pharmaceuticals UK Ltd)  
13 Pegaspargase 3,750units/5ml solution for injection vials  
14 Oncaspar 3,750units/5ml solution for injection vials (Imported (United States))  
15 Pembrolizumab 50mg powder for solution for infusion vials  
16 Keytruda 50mg powder for concentrate for solution for infusion vials (Merck Sharp & Dohme Ltd)  
17 Alimta 500mg powder for concentrate for solution for infusion vials (Eli Lilly and Company Ltd)  
18 Pemetrexed 100mg powder for solution for infusion vials  
19 Alimta 100mg powder for concentrate for solution for infusion vials (Eli Lilly and Company Ltd)  
20 Pemetrexed 500mg powder for solution for infusion vials  
21 Nipent 10mg powder for solution for injection vials (Hospira UK Ltd)  
22 Pentostatin 10mg powder for solution for injection vials  
23 Perjeta 420mg/14ml concentrate for solution for infusion vials (Roche Products Ltd)  
24 Ponatinib 15mg tablets  
25 Iclusig 15mg tablets (Incyte Biosciences UK Ltd)  
26 Iclusig 45mg tablets (Incyte Biosciences UK Ltd)  
27 Ponatinib 45mg tablets  
28 Porfimer sodium 75mg powder for solution for injection vials  
29 Photofrin 15mg powder for solution for injection vials (Axcen Pharma Inc)  
30 Photofrin 75mg powder for solution for injection vials (Pinnacle Biologics BV)  
31 Porfimer sodium 15mg powder for solution for injection vials  
32 Procarbazine 50mg capsules  
33 Tomudex 2mg powder for solution for infusion vials (Hospira UK Ltd)  
34 Raltitrexed 2mg powder for solution for infusion vials  
35 Ramucirumab 100mg/10ml solution for infusion vials  
36 Cyramza 100mg/10ml concentrate for solution for infusion vials (Eli Lilly and Company Ltd)  
37 Cyramza 500mg/50ml concentrate for solution for infusion vials (Eli Lilly and Company Ltd)  
38 Ramucirumab 500mg/50ml solution for infusion vials  
39 Razoxane 125mg tablets  
40 Stivarga 40mg tablets (Bayer Plc)  
41 Regorafenib 40mg tablets  
42 Jakavi 5mg tablets (Novartis Pharmaceuticals UK Ltd)  
43 Jakavi 15mg tablets (Novartis Pharmaceuticals UK Ltd)  
44 Ruxolitinib 15mg tablets  
45 Ruxolitinib 5mg tablets  
46 Jakavi 20mg tablets (Novartis Pharmaceuticals UK Ltd)  
47 Ruxolitinib 20mg tablets  
48 Nexavar 200mg tablets (Bayer Plc)  
49 Sorafenib 200mg tablets  
50 Sunitinib 50mg capsules

1 Sunitinib 25mg capsules  
2 Sunitinib 12.5mg capsules  
3 Sutent 50mg capsules (Pfizer Ltd)  
4 Sutent 12.5mg capsules (Pfizer Ltd)  
5 Sutent 25mg capsules (Pfizer Ltd)  
6 Imlygic 1million plaque forming units/1ml solution for injection vials (Amgen Ltd)  
7 Imlygic 100million plaque forming units/1ml solution for injection vials (Amgen Ltd)  
8 Talimogene laherparepvec 1million plaque forming units/1ml solution for injection vials  
9 Talimogene laherparepvec 100million plaque forming units/1ml solution for injection vials  
10 Foscan 20mg/5ml solution for injection vials (Biotech Pharma Ltd)  
11 Temoporfin 20mg/5ml solution for injection vials  
12 Temomedac 100mg capsules (medac UK)  
13 Temozolomide 250mg capsules  
14 Temodal 5mg capsules (Merck Sharp & Dohme Ltd)  
15 Temodal 180mg capsules (Merck Sharp & Dohme Ltd)  
16 Temozolomide 20mg capsules  
17 Temozolomide 180mg capsules  
18 Temozolomide 140mg capsules  
19 Temomedac 5mg capsules (medac UK)  
20 Temomedac 140mg capsules (medac UK)  
21 Temomedac 250mg capsules (medac UK)  
22 Temodal 20mg capsules (Merck Sharp & Dohme Ltd)  
23 Temodal 250mg capsules (Merck Sharp & Dohme Ltd)  
24 Temomedac 20mg capsules (medac UK)  
25 Temodal 140mg capsules (Merck Sharp & Dohme Ltd)  
26 Temomedac 180mg capsules (medac UK)  
27 Temodal 100mg capsules (Merck Sharp & Dohme Ltd)  
28 Temozolomide 5mg capsules  
29 Temozolomide 100mg capsules  
30 Temsirolimus 30mg/1.2ml solution for infusion vials and diluent  
31 Torisel 30mg/1.2ml concentrate for solution for infusion vials and diluent (Pfizer Ltd)  
32 Thiotepa 15mg powder for solution for infusion vials  
33 Tepadina 15mg powder for concentrate for solution for infusion vials (Adienne Pharma & Biotech)  
34 Thiotepa 100mg powder for solution for infusion vials  
35 Thiotepa 15mg powder for solution for injection vials  
36 Tepadina 100mg powder for concentrate for solution for infusion vials (Adienne Pharma & Biotech)  
37 Tioguanine 40mg tablets  
38 Lanvis 40mg tablets (Aspen Pharma Trading Ltd)  
39 Trifluridine 15mg / Tipiracil 6.14mg tablets  
40 Trifluridine 20mg / Tipiracil 8.19mg tablets  
41 Lonsurf 20mg/8.19mg tablets (Servier Laboratories Ltd)  
42 Lonsurf 15mg/6.14mg tablets (Servier Laboratories Ltd)  
43 Potactasol 1mg powder for concentrate for solution for infusion vials (Actavis UK Ltd)  
44 Topotecan 4mg powder for solution for infusion vials  
45 Topotecan 4mg/4ml solution for infusion vials  
46 Topotecan 1mg capsules  
47 Topotecan 250microgram capsules  
48 Hycamtin 1mg capsules (Novartis Pharmaceuticals UK Ltd)  
49 Hycamtin 1mg powder for concentrate for solution for infusion vials (Novartis Pharmaceuticals UK Ltd)  
50 Potactasol 4mg powder for concentrate for solution for infusion vials (Actavis UK Ltd)

1 Topotecan 1mg powder for solution for infusion vials  
2 Hycamtin 4mg powder for concentrate for solution for infusion vials (Novartis Pharmaceuticals UK Ltd)  
3 Topotecan 1mg/1ml solution for infusion vials  
4 Hycamtin 0.25mg capsules (Novartis Pharmaceuticals UK Ltd)  
5 Mekinist 2mg tablets (Novartis Pharmaceuticals UK Ltd)  
6 Trametinib 500micrograms tablets  
7 Mekinist 0.5mg tablets (Novartis Pharmaceuticals UK Ltd)  
8 Trametinib 2mg tablets  
9 Herceptin 150mg powder for solution for infusion vials (Roche Products Ltd)  
10 Trastuzumab 150mg powder for solution for infusion vials  
11 Trastuzumab emtansine 160mg powder for solution for infusion vials  
12 Kadcyca 160mg powder for concentrate for solution for infusion vials (Roche Products Ltd)  
13 Trastuzumab emtansine 100mg powder for solution for infusion vials  
14 Kadcyca 100mg powder for concentrate for solution for infusion vials (Roche Products Ltd)  
15 Treosulfan 5g powder for solution for injection vials  
16 Treosulfan 250mg capsules  
17 Treosulfan 1g powder for solution for injection vials  
18 Vesanoind 10mg capsules (Intrapharm Laboratories Ltd)  
19 Tretinoin 10mg capsules  
20 Vandetanib 100mg tablets  
21 Caprelsa 300mg tablets (Genzyme Therapeutics Ltd)  
22 Caprelsa 100mg tablets (Genzyme Therapeutics Ltd)  
23 Vandetanib 300mg tablets  
24 Vemurafenib 240mg tablets  
25 Zelboraf 240mg tablets (Roche Products Ltd)  
26 Venetoclax 100mg tablets  
27 Venclyxto 50mg tablets (AbbVie Ltd)  
28 Venetoclax 10mg tablets  
29 Venetoclax 50mg tablets  
30 Venclyxto 10mg tablets (AbbVie Ltd)  
31 Venclyxto 100mg tablets (AbbVie Ltd)  
32 Velbe 10mg powder for solution for injection vials (Eli Lilly and Company Ltd)  
33 Vincristine 5mg/5ml solution for injection vials  
34 Vincristine 1mg/1ml solution for injection vials  
35 Vincristine 2mg/2ml solution for injection vials  
36 Oncovin 1mg/1ml solution for injection vials (Eli Lilly and Company Ltd)  
37 Vindesine 5mg powder for solution for injection vials  
38 Eldisine 5mg powder for solution for injection vials (Thornton & Ross Ltd)  
39 Vinorelbine 50mg/5ml solution for infusion vials  
40 Vinorelbine 10mg/1ml solution for infusion vials  
41 Navelbine 80mg capsules (Pierre Fabre Ltd)  
42 Vinorelbine 30mg capsules  
43 Vinorelbine 20mg capsules  
44 Navelbine 50mg/5ml concentrate for solution for infusion vials (Pierre Fabre Ltd)  
45 Navelbine 30mg capsules (Pierre Fabre Ltd)  
46 Vinorelbine 80mg capsules  
47 Navelbine 20mg capsules (Pierre Fabre Ltd)  
48 Navelbine 10mg/1ml concentrate for solution for infusion vials (Pierre Fabre Ltd)  
49 Vismodegib 150mg capsules  
50 Erivedge 150mg capsules (Roche Products Ltd)



1 Erivedge 150mg capsules (Roche Products Ltd)  
2 radical radiotherapy  
3  
4 Adalimumab 40mg/0.8ml solution for injection pre-filled syringes  
5 Humira 40mg/0.8ml solution for injection pre-filled syringes (AbbVie Ltd)  
6 Adalimumab 40mg/0.8ml solution for injection pre-filled disposable devices  
7 Humira 40mg/0.8ml solution for injection pre-filled pens (AbbVie Ltd)  
8 Adalimumab 40mg/0.8ml solution for injection vials  
9 Humira 40mg/0.8ml solution for injection vials (AbbVie Ltd)  
10 Adalimumab 40mg/0.4ml solution for injection pre-filled syringes  
11 Adalimumab 40mg/0.4ml solution for injection pre-filled disposable devices  
12 Humira 40mg/0.4ml solution for injection pre-filled syringes (AbbVie Ltd)  
13 Humira 40mg/0.4ml solution for injection pre-filled pens (AbbVie Ltd)  
14 Adalimumab 20mg/0.2ml solution for injection pre-filled syringes  
15 Humira 20mg/0.2ml solution for injection pre-filled syringes (AbbVie Ltd)  
16 Amgevita 40mg/0.8ml solution for injection pre-filled pens (Amgen Ltd)  
17 Amgevita 40mg/0.8ml solution for injection pre-filled syringes (Amgen Ltd)  
18 Adalimumab 20mg/0.4ml solution for injection pre-filled syringes  
19 Amgevita 20mg/0.4ml solution for injection pre-filled syringes (Amgen Ltd)  
20 Adalimumab 80mg/0.8ml solution for injection pre-filled disposable devices  
21 Adalimumab 80mg/0.8ml solution for injection pre-filled syringes  
22 Humira 80mg/0.8ml solution for injection pre-filled pens (AbbVie Ltd)  
23 Humira 80mg/0.8ml solution for injection pre-filled syringes (AbbVie Ltd)  
24 Hyrimoz 40mg/0.8ml solution for injection pre-filled pens (Sandoz Ltd)  
25 Hyrimoz 40mg/0.8ml solution for injection pre-filled syringes (Sandoz Ltd)  
26 Imraldi 40mg/0.8ml solution for injection pre-filled pens (Biogen Idec Ltd)  
27 Imraldi 40mg/0.8ml solution for injection pre-filled syringes (Biogen Idec Ltd)  
28 Idacio 40mg/0.8ml solution for injection vials (Fresenius Kabi Ltd)  
29 Idacio 40mg/0.8ml solution for injection pre-filled pens (Fresenius Kabi Ltd)  
30 Idacio 40mg/0.8ml solution for injection pre-filled syringes (Fresenius Kabi Ltd)  
31 Etanercept 25mg powder and solvent for solution for injection vials  
32 Enbrel 25mg powder and solvent for solution for injection vials (Pfizer Ltd)  
33 Etanercept 50mg powder and solvent for solution for injection vials  
34 Enbrel 50mg powder and solvent for solution for injection vials (Wyeth Pharmaceuticals)  
35 Etanercept 50mg/1ml solution for injection pre-filled syringes  
36 Enbrel 50mg/1ml solution for injection pre-filled syringes (Pfizer Ltd)  
37 Enbrel Paediatric 25mg powder and solvent for solution for injection vials (Pfizer Ltd)  
38 Etanercept 25mg/0.5ml solution for injection pre-filled syringes  
39 Enbrel 25mg/0.5ml solution for injection pre-filled syringes (Pfizer Ltd)  
40 Etanercept 50mg/1ml solution for injection pre-filled disposable devices  
41 Enbrel 50mg/1ml solution for injection pre-filled MyClic pens (Pfizer Ltd)  
42 Etanercept 10mg powder and solvent for solution for injection vials  
43 Enbrel Paediatric 10mg powder and solvent for solution for injection vials (Pfizer Ltd)  
44 Benepali 50mg/1ml solution for injection pre-filled pens (Biogen Idec Ltd)  
45 Benepali 50mg/1ml solution for injection pre-filled syringes (Biogen Idec Ltd)  
46 Benepali 25mg/0.5ml solution for injection pre-filled syringes (Biogen Idec Ltd)  
47 Erelzi 25mg/0.5ml solution for injection pre-filled syringes (Sandoz Ltd)  
48 Erelzi 50mg/1ml solution for injection pre-filled syringes (Sandoz Ltd)  
49 Erelzi 50mg/1ml solution for injection pre-filled pens (Sandoz Ltd)  
50 Etanercept 25mg/0.5ml solution for injection pre-filled disposable devices  
51 Enbrel 25mg/0.5ml solution for injection pre-filled MyClic pens (Pfizer Ltd)

1  
2 Infliximab 100mg powder for solution for infusion vials  
3 Infliximab 120mg/1ml solution for injection pre-filled disposable devices  
4 Infliximab 120mg/1ml solution for injection pre-filled syringes  
5 Remicade 100mg powder for concentrate for solution for infusion vials (Merck Sharp & Dohme (UK) Ltd)  
6 Remsima 100mg powder for concentrate for solution for infusion vials (Celltrion Healthcare UK Ltd)  
7 Flixabi 100mg powder for concentrate for solution for infusion vials (Biogen Idec Ltd)  
8 Zessly 100mg powder for concentrate for solution for infusion vials (Sandoz Ltd)  
9 Remsima 120mg/1ml solution for injection pre-filled pens (Celltrion Healthcare UK Ltd)  
10 Remsima 120mg/1ml solution for injection pre-filled syringes (Celltrion Healthcare UK Ltd)  
11 Simponi 50mg/0.5ml solution for injection pre-filled syringes (Merck Sharp & Dohme (UK) Ltd)  
12 Simponi 50mg/0.5ml solution for injection pre-filled pens (Merck Sharp & Dohme (UK) Ltd)  
13 Simponi 100mg/1ml solution for injection pre-filled pens (Merck Sharp & Dohme (UK) Ltd)  
14 Golimumab 100mg/1ml solution for injection pre-filled disposable devices  
15 Golimumab 50mg/0.5ml solution for injection pre-filled disposable devices  
16 Golimumab 50mg/0.5ml solution for injection pre-filled syringes  
17 Cimzia 200mg/1ml solution for injection pre-filled syringes (UCB Pharma Ltd)  
18 Certolizumab pegol 200mg/1ml solution for injection pre-filled syringes  
19 Certolizumab pegol 200mg/1ml solution for injection pre-filled disposable devices  
20 Cimzia 200mg/1ml solution for injection pre-filled pens (UCB Pharma Ltd)  
21 Certolizumab pegol 200mg/1ml solution for injection cartridges  
22 Cimzia 200mg/1ml solution for injection in a dose-dispenser cartridge (UCB Pharma Ltd)  
23 Abatacept 250mg powder for solution for infusion vials  
24 Abatacept 125mg/1ml solution for injection pre-filled syringes  
25 Abatacept 125mg/1ml solution for injection pre-filled disposable devices  
26 Abatacept 50mg/0.4ml solution for injection pre-filled syringes  
27 Abatacept 87.5mg/0.7ml solution for injection pre-filled syringes  
28 Orencia 250mg powder for concentrate for solution for infusion vials (Bristol-Myers Squibb Pharmaceuticals Lt  
29 Orencia 125mg/1ml solution for injection pre-filled syringes (Bristol-Myers Squibb Pharmaceuticals Ltd)  
30 Orencia ClickJect 125mg/1ml solution for injection pre-filled pens (Bristol-Myers Squibb Pharmaceuticals Ltd)  
31 Orencia 50mg/0.4ml solution for injection pre-filled syringes (Bristol-Myers Squibb Pharmaceuticals Ltd)  
32 Olaparib 50mg capsules  
33 Olaparib 100mg tablets  
34 Olaparib 150mg tablets  
35 Lynparza 150mg tablets (AstraZeneca UK Ltd)  
36 Lynparza 100mg tablets (AstraZeneca UK Ltd)  
37 Rucaparib 200mg tablets  
38 Rucaparib 250mg tablets  
39 Rucaparib 300mg tablets  
40 Rubraca 300mg tablets (Clovis Oncology UK Ltd)  
41 Niraparib 100mg capsules  
42 Zejula 100mg capsules (GlaxoSmithKline UK Ltd)  
43 Talazoparib 1mg capsules  
44 Talazoparib 250microgram capsules  
45 Afatinib 20mg tablets  
46 Afatinib 30mg tablets  
47 Afatinib 40mg tablets  
48 Afatinib 50mg tablets  
49 Giotrif 40mg tablets (Boehringer Ingelheim Ltd)  
50 Axitinib 1mg tablets  
51 Axitinib 5mg tablets



1 Axitinib 3mg tablets  
2 Axitinib 7mg tablets  
3 Inlyta 7mg tablets (Pfizer Ltd)  
4 Inlyta 3mg tablets (Pfizer Ltd)  
5 \*Abnoba Viscum Fraxini Injection 20 mg/1 ml ampoule  
6 \*Abnoba Viscum Fraxini Injection 2 mg/1 ml ampoule  
7 \*Abnoba Viscum Fraxini Injection 0.2 mg/1 ml ampoule  
8 \*Abnoba Viscum Fraxini Injection 0.02 mg/1 ml ampoule  
9 \*Abnoba Viscum Fraxini Injection D6, 1 ml ampoule  
10 \*Abnoba Viscum Fraxini Injection D10, 1 ml ampoule  
11 Bosutinib 100mg tablets  
12 Bosutinib 500mg tablets  
13 Bosutinib 400mg tablets  
14 Cetuximab 100mg/20ml solution for infusion vials  
15 Cetuximab 500mg/100ml solution for infusion vials  
16 Erbitux 100mg/20ml solution for infusion vials (Merck Serono Ltd)  
17 Cobimetinib 20mg tablets  
18 Crizotinib 200mg capsules  
19 Crizotinib 250mg capsules  
20 Xalkori 250mg capsules (Pfizer Ltd)  
21 Cabozantinib 20mg capsules  
22 Cometriq 20mg capsules (Ipsen Ltd)  
23 Cabozantinib 20mg tablets  
24 Cabozantinib 40mg tablets  
25 Cabometyx 20mg tablets (Ipsen Ltd)  
26 Cabometyx 40mg tablets (Ipsen Ltd)  
27 Cabozantinib 60mg tablets  
28 Dacomitinib 30mg tablets  
29 Dasatinib 20mg tablets  
30 Dasatinib 50mg tablets  
31 Dasatinib 70mg tablets  
32 Sprycel 50mg tablets (Bristol-Myers Squibb Pharmaceuticals Ltd)  
33 Dasatinib 100mg tablets  
34 Dasatinib 140mg tablets  
35 Dasatinib 80mg tablets  
36 Dasatinib 10mg/ml oral suspension  
37 Entrectinib 100mg capsules  
38 Entrectinib 200mg capsules  
39 Erlotinib 100mg tablets  
40 Erlotinib 150mg tablets  
41 Tarceva 100mg tablets (Roche Products Ltd)  
42 Tarceva 150mg tablets (Roche Products Ltd)  
43 Erlotinib 25mg tablets  
44 Tarceva 25mg tablets (Roche Products Ltd)  
45 Fostamatinib 100mg tablets  
46 Fostamatinib 150mg tablets  
47 Gefitinib 250mg tablets  
48 Iressa 250mg tablets (AstraZeneca UK Ltd)  
49 Timentin 3.2g powder for solution for infusion vials (Laboratoires Delbert)  
50 Ibrutinib 140mg capsules

1 Imbruvica 140mg capsules (Janssen-Cilag Ltd)  
2 Ibrutinib 140mg tablets  
3 Ibrutinib 280mg tablets  
4 Ibrutinib 420mg tablets  
5 Ibrutinib 560mg tablets  
6 Imbruvica 280mg tablets (Janssen-Cilag Ltd)  
7 Imbruvica 420mg tablets (Janssen-Cilag Ltd)  
8 Imatinib 100mg capsules  
9 Glivec 100mg capsules (Novartis Pharmaceuticals UK Ltd)  
10 Imatinib 400mg tablets  
11 Glivec 400mg tablets (Novartis Pharmaceuticals UK Ltd)  
12 Imatinib 100mg tablets  
13 Glivec 100mg tablets (Novartis Pharmaceuticals UK Ltd)  
14 Imatinib 400mg capsules  
15 Imatinib 80mg/ml oral solution sugar free  
16 Lapatinib 250mg tablets  
17 Lenvatinib 4mg capsules  
18 Lenvima 4mg capsules (Eisai Ltd)  
19 Lenvatinib 10mg capsules  
20 Nilotinib 200mg capsules  
21 Tasigna 200mg capsules (Novartis Pharmaceuticals UK Ltd)  
22 Nilotinib 150mg capsules  
23 Tasigna 150mg capsules (Novartis Pharmaceuticals UK Ltd)  
24 Nilotinib 50mg capsules  
25 Pazopanib 200mg tablets  
26 Pazopanib 400mg tablets  
27 Votrient 200mg tablets (Novartis Pharmaceuticals UK Ltd)  
28 Votrient 400mg tablets (Novartis Pharmaceuticals UK Ltd)  
29 Pegaptanib 300micrograms/0.09ml solution for injection pre-filled syringes  
30 Ruxolitinib 5mg tablets  
31 Ruxolitinib 15mg tablets  
32 Ruxolitinib 20mg tablets  
33 Jakavi 15mg tablets (Novartis Pharmaceuticals UK Ltd)  
34 Jakavi 20mg tablets (Novartis Pharmaceuticals UK Ltd)  
35 Ruxolitinib 10mg tablets  
36 Sorafenib 200mg tablets  
37 Nexavar 200mg tablets (Bayer Plc)  
38 Sunitinib 12.5mg capsules  
39 Sunitinib 25mg capsules  
40 Sunitinib 50mg capsules  
41 Sutent 12.5mg capsules (Pfizer Ltd)  
42 Sutent 25mg capsules (Pfizer Ltd)  
43 Sutent 50mg capsules (Pfizer Ltd)  
44 Vandetanib 100mg tablets  
45 Vandetanib 300mg tablets  
46 Vemurafenib 240mg tablets  
47 Zelboraf 240mg tablets (Roche Products Ltd)  
48 Medrone 100mg tablets (Pfizer Ltd)  
49 Methylprednisolone 100mg tablets  
50 Medrone 100mg tablets (Pfizer Ltd)

1  
2 Methylprednisolone 100mg tablets  
3 Prednisolone 20mg/application foam enema  
4 Prednisolone 25mg/1ml suspension for injection ampoules  
5 Prednisolone 25mg tablets  
6 Solu-Medrone 40mg powder and solvent for solution for injection vials (Pfizer Ltd)  
7 Solu-Medrone 1g powder and solvent for solution for injection vials (Pfizer Ltd)  
8 Solu-Medrone 125mg powder and solvent for solution for injection vials (Pfizer Ltd)  
9 Solu-Medrone 2g powder and solvent for solution for injection vials (Pfizer Ltd)  
10 Solu-Medrone 500mg powder and solvent for solution for injection vials (Pfizer Ltd)  
11 Prednisolone sodium phosphate 0.05% eye drops  
12 Prednisolone sodium phosphate 0.003% eye drops  
13 Prednisolone 5mg/5ml oral solution unit dose  
14 Prednisolone 30mg tablets  
15 Dexsol 2mg/5ml oral solution (Rosemont Pharmaceuticals Ltd)  
16 Dexamethasone 2mg/5ml oral solution sugar free  
17 Dexamethasone 4mg tablets  
18 Dexamethasone 5mg/5ml oral solution  
19 Dexamethasone 5mg/5ml oral suspension  
20 Dexamethasone 500micrograms/5ml oral solution  
21 Dexamethasone 500micrograms/5ml oral suspension  
22 Dexamethasone 700microgram intravitreal implant with device  
23 Ozurdex 700microgram intravitreal implant in applicator (Allergan Ltd)  
24 Dexamethasone 20mg/5ml oral solution sugar free  
25 Dexamethasone 2mg soluble tablets sugar free  
26 Dexamethasone 4mg soluble tablets sugar free  
27 Dexamethasone 8mg soluble tablets sugar free  
28 Glensoludex 2mg soluble tablets (Glenmark Pharmaceuticals Europe Ltd)  
29 Glensoludex 4mg soluble tablets (Glenmark Pharmaceuticals Europe Ltd)  
30 Glensoludex 8mg soluble tablets (Glenmark Pharmaceuticals Europe Ltd)  
31 Dexamethasone 40mg tablets  
32 Dexamethasone 8mg tablets  
33 Dexamethasone 10mg soluble tablets sugar free  
34 \*Abnoba Viscum Fraxini Injection D20, 1 ml ampoule  
35  
36  
37  
38  
39  
40  
41  
42  
43  
44  
45  
46  
47  
48  
49  
50  
51  
52  
53  
54  
55  
56  
57  
58  
59  
60

1  
2  
3  
4  
5  
6  
7  
8  
9  
10  
11  
12  
13  
14  
15  
16  
17  
18  
19  
20  
21  
22  
23  
24  
25  
26  
27  
28  
29  
30  
31  
32  
33  
34  
35  
36  
37  
38  
39  
40  
41  
42  
43  
44  
45  
46  
47  
48  
49  
50  
51  
52  
53  
54  
55  
56  
57  
58  
59  
60

For peer review only

1  
2  
3  
4  
5  
6  
7  
8  
9  
10  
11  
12  
13  
14  
15  
16  
17  
18  
19  
20  
21  
22  
23  
24  
25  
26  
27  
28  
29  
30  
31  
32  
33  
34  
35  
36  
37  
38  
39  
40  
41  
42  
43  
44  
45  
46  
47  
48  
49  
50  
51  
52  
53  
54  
55  
56  
57  
58  
59  
60

For peer review only

1  
2  
3  
4  
5  
6  
7  
8  
9  
10  
11  
12  
13  
14  
15  
16  
17  
18  
19  
20  
21  
22  
23  
24  
25  
26  
27  
28  
29  
30  
31  
32  
33  
34  
35  
36  
37  
38  
39  
40  
41  
42  
43  
44  
45  
46  
47  
48  
49  
50  
51  
52  
53  
54  
55  
56  
57  
58  
59  
60

For peer review only

1  
2  
3  
4  
5  
6  
7  
8  
9  
10  
11  
12  
13  
14  
15  
16  
17  
18  
19  
20  
21  
22  
23  
24  
25  
26  
27  
28  
29  
30  
31  
32  
33  
34  
35  
36  
37  
38  
39  
40  
41  
42  
43  
44  
45  
46  
47  
48  
49  
50  
51  
52  
53  
54  
55  
56  
57  
58  
59  
60

For peer review only

1  
2  
3  
4  
5  
6  
7  
8  
9  
10  
11  
12  
13  
14  
15  
16  
17  
18  
19  
20  
21  
22  
23  
24  
25  
26  
27  
28  
29  
30  
31  
32  
33  
34  
35  
36  
37  
38  
39  
40  
41  
42  
43  
44  
45  
46  
47  
48  
49  
50  
51  
52  
53  
54  
55  
56  
57  
58  
59  
60

d)  
d)

For peer review only



1  
2  
3  
4  
5  
6  
7  
8  
9  
10  
11  
12  
13  
14  
15  
16  
17  
18  
19  
20  
21  
22  
23  
24  
25  
26  
27  
28  
29  
30  
31  
32  
33  
34  
35  
36  
37  
38  
39  
40  
41  
42  
43  
44  
45  
46  
47  
48  
49  
50  
51  
52  
53  
54  
55  
56  
57  
58  
59  
60

For peer review only

1  
2  
3  
4  
5  
6  
7  
8  
9  
10  
11  
12  
13  
14  
15  
16  
17  
18  
19  
20  
21  
22  
23  
24  
25  
26  
27  
28  
29  
30  
31  
32  
33  
34  
35  
36  
37  
38  
39  
40  
41  
42  
43  
44  
45  
46  
47  
48  
49  
50  
51  
52  
53  
54  
55  
56  
57  
58  
59  
60

For peer review only

1  
2  
3  
4  
5  
6  
7  
8  
9  
10  
11  
12  
13  
14  
15  
16  
17  
18  
19  
20  
21  
22  
23  
24  
25  
26  
27  
28  
29  
30  
31  
32  
33  
34  
35  
36  
37  
38  
39  
40  
41  
42  
43  
44  
45  
46  
47  
48  
49  
50  
51  
52  
53  
54  
55  
56  
57  
58  
59  
60

For peer review only

1  
2  
3  
4  
5  
6  
7  
8  
9  
10  
11  
12  
13  
14  
15  
16  
17  
18  
19  
20  
21  
22  
23  
24  
25  
26  
27  
28  
29  
30  
31  
32  
33  
34  
35  
36  
37  
38  
39  
40  
41  
42  
43  
44  
45  
46  
47  
48  
49  
50  
51  
52  
53  
54  
55  
56  
57  
58  
59  
60

For peer review only

1  
2  
3  
4  
5  
6  
7  
8  
9  
10  
11  
12  
13  
14  
15  
16  
17  
18  
19  
20  
21  
22  
23  
24  
25  
26  
27  
28  
29  
30  
31  
32  
33  
34  
35  
36  
37  
38  
39  
40  
41  
42  
43  
44  
45  
46  
47  
48  
49  
50  
51  
52  
53  
54  
55  
56  
57  
58  
59  
60

For peer review only

1  
2  
3  
4  
5  
6  
7  
8  
9  
10  
11  
12  
13  
14  
15  
16  
17  
18  
19  
20  
21  
22  
23  
24  
25  
26  
27  
28  
29  
30  
31  
32  
33  
34  
35  
36  
37  
38  
39  
40  
41  
42  
43  
44  
45  
46  
47  
48  
49  
50  
51  
52  
53  
54  
55  
56  
57  
58  
59  
60

For peer review only

1  
2  
3  
4  
5  
6  
7  
8  
9  
10  
11  
12  
13  
14  
15  
16  
17  
18  
19  
20  
21  
22  
23  
24  
25  
26  
27  
28  
29  
30  
31  
32  
33  
34  
35  
36  
37  
38  
39  
40  
41  
42  
43  
44  
45  
46  
47  
48  
49  
50  
51  
52  
53  
54  
55  
56  
57  
58  
59  
60

For peer review only

1  
2  
3  
4  
5  
6  
7  
8  
9  
10  
11  
12  
13  
14  
15  
16  
17  
18  
19  
20  
21  
22  
23  
24  
25  
26  
27  
28  
29  
30  
31  
32  
33  
34  
35  
36  
37  
38  
39  
40  
41  
42  
43  
44  
45  
46  
47  
48  
49  
50  
51  
52  
53  
54  
55  
56  
57  
58  
59  
60

For peer review only



1  
2  
3  
4  
5  
6  
7  
8  
9  
10  
11  
12  
13  
14  
15  
16  
17  
18  
19  
20  
21  
22  
23  
24  
25  
26  
27  
28  
29  
30  
31  
32  
33  
34  
35  
36  
37  
38  
39  
40  
41  
42  
43  
44  
45  
46  
47  
48  
49  
50  
51  
52  
53  
54  
55  
56  
57  
58  
59  
60

l)

For peer review only

| OPCS code | Term                                                    |
|-----------|---------------------------------------------------------|
| W34       | Graft of bone marrow                                    |
| W34.1     | AUTOGRAFT OF BONE MARROW                                |
| W34.2     | ALLOGRAFT OF BONE MARROW NEC                            |
| W34.3     | ALLOGRAFT OF BONE MARROW FROM SIBLING DONOR             |
| W34.4     | ALLOGRAFT OF BONE MARROW FROM MATCHED UNRELATED DONOR   |
| W34.5     | ALLOGRAFT OF BONE MARROW FROM HAPLOIDENTICAL DONOR      |
| W34.6     | ALLOGRAFT OF BONE MARROW FROM UNMATCHED UNRELATED DONOR |
| W34.8     | Graft of bone marrow, OTHER SPECIFIED                   |
| W34.9     | Graft of bone marrow, UNSPECIFIED                       |
| W99       | Graft of bone marrow                                    |
| W99.1     | ALLOGRAFT OF CORD BLOOD STEM CELLS TO BONE MARROW       |
| W99.8     | Graft of bone marrow, OTHER SPECIFIED                   |
| W99.9     | Graft of bone marrow, UNSPECIFIED                       |
| X33.4     | AUTOLOGOUS PERIPHERAL BLOOD STEM CELL TRANSPLANT        |
| X33.5     | SYNGENEIC PERIPHERAL BLOOD STEM CELL TRANSPLANT         |
| X33.6     | ALLOGENEIC PERIPHERAL BLOOD STEM CELL TRANSPLANT        |

1  
2  
3  
4  
5  
6  
7  
8  
9  
10  
11  
12  
13  
14  
15  
16  
17  
18  
19  
20  
21  
22  
23  
24  
25  
26  
27  
28  
29  
30  
31  
32  
33  
34  
35  
36  
37  
38  
39  
40  
41  
42  
43  
44  
45  
46  
47  
48  
49  
50  
51  
52  
53  
54  
55  
56  
57  
58  
59  
60

3  
NOR

For peer review only

1  
2 Medcodeid  
3 215631000000118  
4 303686010  
5 303687018  
6 303690012  
7  
8 411383013  
9 1772803017  
10 131661000006114  
11 1119251000000112  
12 1689421000000115  
13 1747711000006116  
14 3230001000006118  
15 3828711000006113  
16 3992891000006113  
17 6567671000006110  
18 6567681000006113  
19 6567721000006118  
20 7281951000006112  
21 23676016  
22 297780010  
23 2164217010  
24 2816277010  
25 141181000006110  
26 141191000006113  
27 141201000006111  
28 141211000006114  
29 141221000006118  
30 141231000006115  
31 141241000006113  
32 413591000006113  
33 940531000006110  
34 2005411000006110  
35 2380521000000115  
36 2684701000006112  
37 3070701000006112  
38 3260101000006113  
39 3308541000006113  
40 4392811000006113  
41 4392911000006118  
42 6888471000006113  
43 6904721000006118  
44 6904731000006115  
45 6905681000006114  
46 6905701000006112  
47 6906651000006110  
48 6906661000006112  
49 7089281000006117  
50 12084841000006111  
51 12084861000006110  
52 12218521000006116

For peer review only

1  
2 12735431000006111  
3 12735441000006118  
4 351150014  
5 492446019  
6 2759411000006117  
7 2927341000006111  
8 4392941000006119  
9 3572551000006118  
10 3572591000006112  
11 3620711000006117  
12 2759391000006117  
13 7730691000006117  
14 2933771000006112  
15 3260631000006113  
16 5063951000006115  
17 4393011000006110  
18 3375911000006118  
19 6897941000006112  
20 3260621000006110  
21 3574151000006117  
22 3741651000006111  
23 3910091000006119  
24 8022691000006113  
25 2760441000006117  
26 3087921000006111  
27 3910111000006111  
28 3375961000006115  
29 3375951000006117  
30 3690391000006116  
31 3087931000006114  
32 2872741000006118  
33 4197441000006118  
34 3503691000006112  
35 6897931000006119  
36 6901291000006112  
37 5064031000006113  
38 9330921000006118  
39 3503711000006110  
40 3508741000006117  
41 3087941000006116  
42 4393031000006116  
43 7730701000006117  
44 501134015  
45 141261000006112  
46 510091000006118  
47 5064051000006118  
48 7730711000006119  
49 3625611000006116  
50 2769291000006117  
51 2760461000006118

For peer review only

1 5606361000006119  
2 3741641000006114  
3 3910101000006113  
4 7730721000006110  
5 2769261000006113  
6 3505255014  
7 5063871000006119  
8 2584211000006111  
9 3572561000006116  
10 3726941000006112  
11 4392911000006118  
12 3726951000006114  
13 4392921000006114  
14 110881000006115  
15 294586010  
16 881981000006110  
17 477758018  
18 3574141000006119  
19 5064041000006115  
20 2769271000006118  
21 3959891000006111  
22 9330941000006113  
23 2760431000006110  
24 3505254013  
25 4393081000006115  
26 4393061000006113  
27 3869571000006114  
28 9330911000006114  
29 3505252012  
30 5063971000006113  
31 3910121000006115  
32 4393021000006119  
33 4393051000006111  
34 3087871000006118  
35 3572571000006111  
36 2759381000006115  
37 2927331000006118  
38 2759371000006118  
39 474030011  
40 2872731000006111  
41 3910081000006117  
42 5606351000006116  
43 5063941000006117  
44 3375921000006114  
45 2933781000006110  
46 3375931000006112  
47 7769041000006118  
48 6901301000006113  
49 4393041000006114  
50 8022671000006112

For peer review only

1  
2 3620681000006118  
3 4392981000006113  
4 4392961000006115  
5 7750601000006113  
6 3087851000006111  
7 7750581000006115  
8 3959881000006113  
9 7750591000006117  
10 8022681000006110  
11 5063991000006114  
12 8022661000006117  
13 5063961000006118  
14 12735491000006110  
15 3910131000006117  
16 4392971000006110  
17 3145291000006113  
18 3572581000006114  
19 4197431000006111  
20 3625601000006119  
21 5063981000006111  
22 12735511000006116  
23 399206011  
24 3869581000006112  
25 3505251017  
26 3087881000006115  
27 3690381000006119  
28 3375941000006119  
29 4393071000006118  
30 3508751000006115  
31 3620691000006115  
32 2584231000006117  
33 9330931000006115  
34 3726961000006111  
35 2759401000006115  
36 399209016  
37 500268011  
38 7750571000006118  
39 2760451000006115  
40 7769031000006111  
41 5064021000006110  
42 2927351000006113  
43 2927381000006117  
44 711521000006117  
45 711531000006119  
46 2584251000006112  
47 2584181000006112  
48 2592491000006111  
49 2584261000006114  
50 496520018  
51 2592511000006117  
52  
53  
54  
55  
56  
57  
58  
59  
60

For peer review only

1  
2 5313751000006118  
3 2592521000006113  
4 2584221000006115  
5 2584191000006110  
6 2592541000006118  
7 2584271000006119  
8 2592531000006111  
9 2592501000006115  
10 2584201000006113  
11 5313761000006116  
12  
13  
14  
15  
16  
17  
18  
19  
20  
21  
22  
23  
24  
25  
26  
27  
28  
29  
30  
31  
32  
33  
34  
35  
36  
37  
38  
39  
40  
41  
42  
43  
44  
45  
46  
47  
48  
49  
50  
51  
52  
53  
54  
55  
56  
57  
58  
59  
60

For peer review only



1  
2 Term  
3 Asplenia  
4 Congenital coeliac disease  
5 Acquired coeliac disease  
6 Coeliac disease NOS  
7 Coeliac rickets  
8 Coeliac disease  
9 Sprue - nontropical  
10 Coeliac disease autoantibody profile positive  
11 Coeliac disease annual review  
12 Coeliac disease annual review  
13 Coeliac infantilism  
14 Sprue  
15 Adult form of coeliac disease  
16 Celiac disease  
17 CD - Coeliac disease  
18 Coeliac syndrome  
19 Autoantibody screening for coeliac disease positive  
20 Sickle cell nephropathy  
21 Proliferative retinopathy due to sickle cell disease  
22 RBC's - sickle cells present  
23 History of sickle cell anaemia  
24 Sickle cell anaemia  
25 Sickle-cell anaemia NOS  
26 Sickle-cell anaemia of unspecified type  
27 Sickle cell anaemia with crisis  
28 Sickle cell anaemia with haemoglobin C disease  
29 Sickle-cell anaemia with haemoglobin D disease  
30 Sickle-cell anaemia with haemoglobin E disease  
31 [X]Other sickle-cell disorders  
32 H/O: sickle cell disease  
33 Sickle cell disease annual review  
34 Referral to sickle cell specialist nurse  
35 Sickle cell retinopathy  
36 Sickle cell-haemoglobin C disease  
37 Sickle cell anaemia with haemoglobin E disease  
38 Sickle cell  
39 Sickle cell anemia  
40 Sickle cell-beta-thalassaemia  
41 Sickle cell disease without crisis  
42 Hemoglobin S sickling disorder with crisis  
43 Sickle cell anemia crisis  
44 Sickling disorder due to haemoglobin S  
45 Sickle cell disease  
46 Sickle cell crisis  
47 Sickle cell anemia with crisis  
48 Suspected sickle cell  
49 Vaso-occlusive pain episode in sickle cell disease  
50 Vasoocclusive pain episode in sickle cell disease  
51 Sickle cell-haemoglobin SS disease

1 NHS Sickle Cell and Thalassaemia Screening Programme result consistent with Hb SS (sickle cell-Haemoglobin S)  
2 NHS Sickle Cell and Thalassaemia Screening Programme result consistent with sickle cell anaemia  
3 Homozygous alpha thalassaemia  
4 Thalassaemia  
5 F thalassaemia  
6 Homozygous beta thalassaemia  
7 Double heterozygous for Hb S and beta thalassaemia  
8 beta Thalassaemia  
9 Beta thalassaemia syndrome  
10 Alpha thalassaemia syndrome  
11 Delta-beta thalassaemia  
12 Alpha thalassaemia X-linked intellectual disability syndrome  
13 beta<sup>0</sup> Thalassaemia deletion type  
14 Thalassaemia with other hemoglobinopathy  
15 Delta-beta-Lepore thalassaemia  
16 Sickle cell-beta<sup>0</sup>-thalassaemia  
17 HPFH delta beta<sup>0</sup> thalassaemia  
18 Sickle cell-thalassaemia disease with crisis  
19 Thalassaemia with other haemoglobinopathy  
20 alpha<sup>0</sup> Thalassaemia  
21 delta beta<sup>0</sup> Thalassaemia  
22 beta<sup>0</sup> Thalassaemia  
23 Maternal thalassaemia in pregnancy  
24 delta Thalassaemia  
25 Thalassaemia-haemoglobin S disease  
26 Beta 0 thalassaemia  
27 Hereditary persistence of fetal haemoglobin delta beta<sup>0</sup> thalassaemia  
28 Hereditary persistence of fetal hemoglobin delta beta<sup>0</sup> thalassaemia  
29 epsilon gamma delta beta<sup>0</sup> Thalassaemia  
30 Sickle cell thalassaemia disease  
31 epsilon gamma delta beta Thalassaemia  
32 beta<sup>0</sup> Thalassaemia nondeletion type  
33 Thalassaemia-haemoglobin C disease  
34 Sickle cell-thalassaemia disease with crisis  
35 Sickle cell-thalassaemia disease without crisis  
36 Hemoglobin E/beta thalassaemia disease  
37 Thalassaemia in mother complicating childbirth  
38 Thalassaemia-hemoglobin C disease  
39 delta<sup>0</sup> Thalassaemia  
40 Sickle cell thalassaemia disease  
41 Sickle cell-delta beta<sup>0</sup>-thalassaemia  
42 Alpha thalassaemia X-linked intellectual disability syndrome  
43 Alpha thalassaemia syndrome  
44 Haemoglobin S/beta thalassaemia  
45 Beta thalassaemia major  
46 Double heterozygous for Hb E and beta thalassaemia  
47 Alpha thalassaemia X-linked intellectual deficit  
48 Hb Lepore thalassaemia  
49 Hereditary persistence of fetal haemoglobin thalassaemia  
50 Delta thalassaemia

1 Alpha thalassaemia-mental retardation syndrome  
2 delta beta<sup>0</sup> Thalassaemia  
3 Beta 0 thalassaemia  
4 Alpha thalassaemia X-linked intellectual deficit  
5 Hereditary persistence of foetal haemoglobin thalassaemia  
6 Alpha thalassaemia intellectual disability syndrome deletion type  
7 Homozygous alpha thalassaemia  
8 Alpha thalassaemia major  
9 beta Thalassaemia  
10 Thalassaemia major  
11 Sickle cell-beta-thalassaemia  
12 Homozygous thalassaemia  
13 Sickle cell-beta-thalassaemia  
14 Thalassaemia major - Cooley's anaemia  
15 [X]Other thalassaemias  
16 Thalassaemias  
17 Delta-beta thalassaemia  
18 alpha<sup>0</sup> Thalassaemia  
19 Double heterozygous for Hb E and beta thalassaemia  
20 Hereditary persistence of fetal hemoglobin thalassaemia  
21 <sup>A</sup>gamma delta beta<sup>0</sup> thalassaemia  
22 Maternal thalassaemia in childbirth  
23 delta Thalassaemia  
24 Alpha thalassaemia intellectual disability syndrome deletion type  
25 Sickle cell trait with coexistent alpha-thalassaemia  
26 Sickle cell anemia with coexistent alpha-thalassaemia  
27 Thalassaemia syndrome  
28 Thalassaemia in mother complicating childbirth  
29 Alpha-thalassaemia intellectual disability syndrome linked to chromosome 16  
30 Alpha-beta thalassaemia  
31 Beta zero thalassaemia  
32 Sickle cell-beta<sup>0</sup>-thalassaemia  
33 Sickle cell anaemia with coexistent alpha-thalassaemia  
34 Thalassaemia-hemoglobin S disease  
35 Beta thalassaemia  
36 delta beta Thalassaemia  
37 Homozygous beta thalassaemia  
38 delta beta Thalassaemia  
39 Thalassaemia with haemoglobin S disease  
40 epsilon gamma delta beta Thalassaemia  
41 beta<sup>0</sup> Thalassaemia  
42 Alpha thalassaemia-mental retardation syndrome  
43 Delta-beta-Lepore thalassaemia  
44 HPFH delta beta<sup>0</sup> thalassaemia  
45 beta<sup>0</sup> Thalassaemia deletion type  
46 Hereditary persistence of fetal hemoglobin (HPFH) delta beta<sup>0</sup> thalassaemia  
47 Beta thalassaemia X-linked thrombocytopenia syndrome  
48 Sickle cell-thalassaemia disease without crisis  
49 Sickle cell-delta beta<sup>0</sup>-thalassaemia  
50 Maternal thalassaemia in pregnancy

1 alpha Thalassemia  
2 Thalassemia with hemoglobin S disease  
3 Double heterozygous for Hb S and beta thalassemia  
4 Inclusion body beta-thalassaemia  
5 Sickle cell-thalassaemia disease  
6 Dominant beta-thalassemia  
7  $\alpha\alpha$ gamma delta beta<sup>0</sup> thalassaemia  
8 Inclusion body beta-thalassemia  
9 Thalassemia in mother complicating pregnancy  
10 Gamma thalassemia  
11 Thalassaemia in mother complicating pregnancy  
12 Alpha-beta thalassaemia  
13 NHS Sickle Cell and Thalassaemia Screening Programme result consistent with sickle cell beta-thalassaemia  
14 Beta zero thalassaemia  
15 Hemoglobin S/beta thalassemia  
16 Thalassemia  
17 Beta thalassemia syndrome  
18 beta<sup>0</sup> Thalassaemia nondeletion type  
19 Hb Lepore thalassaemia  
20 Gamma thalassaemia  
21 NHS Sickle Cell and Thalassaemia Screening Programme result consistent with Hb (haemoglobin) variant and/c  
22 Thalassaemia major  
23 Thalassemia syndrome  
24 Alpha-thalassemia intellectual disability syndrome linked to chromosome 16  
25 Sickle cell-thalassemia disease  
26 epsilon gamma delta beta<sup>0</sup> Thalassaemia  
27 Hereditary persistence of foetal haemoglobin (HPFH) delta beta<sup>0</sup> thalassaemia  
28 Sickle cell trait with coexistent alpha-thalassaemia  
29 delta<sup>0</sup> Thalassemia  
30 alpha Thalassemia  
31 Alpha thalassaemia major  
32 Maternal thalassaemia in childbirth  
33 Homozygous thalassaemia  
34 F thalassemia  
35 Thalassaemia NOS  
36 Beta thalassaemia  
37 Dominant beta-thalassaemia  
38 Delta thalassaemia  
39 Beta thalassaemia X-linked thrombocytopenia syndrome  
40 Haemoglobin E/beta thalassaemia disease  
41 Cooley's anemia  
42 Cooley's anaemia  
43 Mediterranean anaemia  
44 Mediterranean anaemia  
45 Haemoglobin Barts hydrops  
46 Haemoglobin Bart's hydrops syndrome  
47 Haemoglobin Bart  
48 Haemoglobin Bart hydrops syndrome  
49 Haemoglobin Bart's disease  
50 Haemoglobin Barts

- 1
- 2 Haemoglobin Barts identification
- 3 Hb - Haemoglobin Barts
- 4 Hemoglobin Barts hydrops
- 5 Hemoglobin Bart's hydrops syndrome
- 6 Hb - Hemoglobin Barts
- 7 Hemoglobin Bart hydrops syndrome
- 8 Hemoglobin Barts
- 9 Hemoglobin Bart
- 10 Hemoglobin Bart's disease
- 11 Hemoglobin Barts identification
- 12
- 13
- 14
- 15
- 16
- 17
- 18
- 19
- 20
- 21
- 22
- 23
- 24
- 25
- 26
- 27
- 28
- 29
- 30
- 31
- 32
- 33
- 34
- 35
- 36
- 37
- 38
- 39
- 40
- 41
- 42
- 43
- 44
- 45
- 46
- 47
- 48
- 49
- 50
- 51
- 52
- 53
- 54
- 55
- 56
- 57
- 58
- 59
- 60

For peer review only

1  
2  
3  
4  
5  
6  
7  
8  
9  
10  
11  
12  
13  
14  
15  
16  
17  
18  
19  
20  
21  
22  
23  
24  
25  
26  
27  
28  
29  
30  
31  
32  
33  
34  
35  
36  
37  
38  
39  
40  
41  
42  
43  
44  
45  
46  
47  
48  
49  
50  
51  
52  
53  
54  
55  
56  
57  
58  
59  
60

For peer review only

1  
2  
3  
4  
5  
6  
7  
8  
9  
10  
11  
12  
13  
14  
15  
16  
17  
18  
19  
20  
21  
22  
23  
24  
25  
26  
27  
28  
29  
30  
31  
32  
33  
34  
35  
36  
37  
38  
39  
40  
41  
42  
43  
44  
45  
46  
47  
48  
49  
50  
51  
52  
53  
54  
55  
56  
57  
58  
59  
60

For peer review only

1  
2  
3  
4  
5  
6  
7  
8  
9  
10  
11  
12  
13  
14  
15  
16  
17  
18  
19  
20  
21  
22  
23  
24  
25  
26  
27  
28  
29  
30  
31  
32  
33  
34  
35  
36  
37  
38  
39  
40  
41  
42  
43  
44  
45  
46  
47  
48  
49  
50  
51  
52  
53  
54  
55  
56  
57  
58  
59  
60

For peer review only



1  
2  
3  
4  
5  
6  
7  
8  
9  
10  
11  
12  
13  
14  
15  
16  
17  
18  
19  
20  
21  
22  
23  
24  
25  
26  
27  
28  
29  
30  
31  
32  
33  
34  
35  
36  
37  
38  
39  
40  
41  
42  
43  
44  
45  
46  
47  
48  
49  
50  
51  
52  
53  
54  
55  
56  
57  
58  
59  
60

emia

For peer review only

| ICD-10 code | Term                                               |
|-------------|----------------------------------------------------|
| Q89.0       | Congenital malformations of spleen                 |
| Q89.0       | Congenital malformations of spleen                 |
| K90.0       | Coeliac Disease                                    |
| D57         | Sickle-Cell Disorders                              |
| D57.0       | Sickle-cell anaemia with crisis                    |
| D57.1       | Sickle-cell anaemia without crisis                 |
| D57.2       | Double heterozygous sickling disorders             |
| D57.8       | Other sickle-cell disorders                        |
| D56         | Thalassaemia                                       |
| D56.0       | Alpha thalassaemia                                 |
| D56.1       | Beta thalassaemia                                  |
| D56.2       | Delta-beta thalassaemia                            |
| D56.4       | Hereditary persistence of fetal haemoglobin [HPFH] |
| D56.8       | Other thalassaemias                                |
| D56.9       | Thalassaemia, unspecified                          |
| D57.2       | Double heterozygous sickling disorders             |

peer review only

|    | Medcodeid         | Term                                                            |
|----|-------------------|-----------------------------------------------------------------|
| 1  |                   |                                                                 |
| 2  |                   |                                                                 |
| 3  | 293635019         | Extreme obesity with alveolar hypoventilation                   |
| 4  | 356968010         | Morbid obesity                                                  |
| 5  | 2160062010        | Body mass index 40+ - severely obese                            |
| 6  | 881831000006116   | Hyperalimantation incl.obesity                                  |
| 7  |                   |                                                                 |
| 8  | 1900331000006113  | Obese class III (body mass index equal to or greater than 40.0) |
| 9  | 1991711000006112  | Reason for influenza vaccine - BMI 40+                          |
| 10 | 6763391000006114  | Body mass index 40+ - morbidly obese                            |
| 11 | 6763401000006111  | BMI (body mass index) 40+ - severely obese                      |
| 12 | 7299071000006115  | Childhood obesity BMI 95-100 percentile                         |
| 13 |                   |                                                                 |
| 14 | 8024931000006112  | Severe obesity                                                  |
| 15 | 13926671000006119 | Obese class III                                                 |
| 16 |                   |                                                                 |
| 17 |                   |                                                                 |
| 18 |                   |                                                                 |
| 19 |                   |                                                                 |
| 20 |                   |                                                                 |
| 21 |                   |                                                                 |
| 22 |                   |                                                                 |
| 23 |                   |                                                                 |
| 24 |                   |                                                                 |
| 25 |                   |                                                                 |
| 26 |                   |                                                                 |
| 27 |                   |                                                                 |
| 28 |                   |                                                                 |
| 29 |                   |                                                                 |
| 30 |                   |                                                                 |
| 31 |                   |                                                                 |
| 32 |                   |                                                                 |
| 33 |                   |                                                                 |
| 34 |                   |                                                                 |
| 35 |                   |                                                                 |
| 36 |                   |                                                                 |
| 37 |                   |                                                                 |
| 38 |                   |                                                                 |
| 39 |                   |                                                                 |
| 40 |                   |                                                                 |
| 41 |                   |                                                                 |
| 42 |                   |                                                                 |
| 43 |                   |                                                                 |
| 44 |                   |                                                                 |
| 45 |                   |                                                                 |
| 46 |                   |                                                                 |
| 47 |                   |                                                                 |
| 48 |                   |                                                                 |
| 49 |                   |                                                                 |
| 50 |                   |                                                                 |
| 51 |                   |                                                                 |
| 52 |                   |                                                                 |
| 53 |                   |                                                                 |
| 54 |                   |                                                                 |
| 55 |                   |                                                                 |
| 56 |                   |                                                                 |
| 57 |                   |                                                                 |
| 58 |                   |                                                                 |
| 59 |                   |                                                                 |
| 60 |                   |                                                                 |

For peer review only

| ICD-10 code | Term                                          |
|-------------|-----------------------------------------------|
| E66.2       | Extreme obesity with alveolar hypoventilation |
| Z68.4       | Body mass index [BMI] 40 or greater, adult    |

For peer review only

1  
2 Medcodeid  
3 1485215015  
4 940171000006115  
5 940181000006117  
6 940191000006119  
7 940201000006116  
8 1822141000006115  
9 1882331000006116  
10 2189071000000110  
11 8136471000006118  
12 294806015  
13 294815010  
14 294828015  
15 294840015  
16 294874016  
17 401866015  
18 401869010  
19 82151000006114  
20 82171000006116  
21 367051000006112  
22 367071000006119  
23 424531000006118  
24 424541000006111  
25 424551000006113  
26 424571000006115  
27 424671000006116  
28 424681000006118  
29 513691000006116  
30 513701000006116  
31 513721000006114  
32 513731000006112  
33 1715191000006112  
34 1715781000006110  
35 1755901000006112  
36 1755911000006110  
37 2729751000000118  
38 2729991000000112  
39 2957311000006113  
40 3087971000006112  
41 3468391000006115  
42 3743451000006110  
43 3767531000006119  
44 5106081000006110  
45 7127651000006115  
46 7127661000006118  
47 8232571000006118  
48 8232591000006117  
49 294919015  
50 296083012  
51 401859016

For peer review only

1 401860014  
2  
3 362221000006114  
4 362271000006110  
5 362381000006115  
6 362391000006117  
7 362421000006113  
8 882301000006112  
9 1872381000006112  
10 1975621000006117  
11 1975671000006116  
12 1975681000006118  
13 1975691000006115  
14 1975711000006117  
15 1975731000006111  
16 1975761000006119  
17 1975781000006112  
18 1975821000006118  
19 1975851000006110  
20 1975871000006117  
21 1975901000006117  
22 2730111000000111  
23 5568191000006118  
24 7696261000006113  
25 130538010  
26 28758018  
27 43595011  
28 52897013  
29 71539017  
30 107878010  
31 114616017  
32 132503015  
33 294725013  
34 294726014  
35 294727017  
36 294728010  
37 294730012  
38 294731011  
39 294734015  
40 294735019  
41 294736018  
42 294737010  
43 294738017  
44 294739013  
45 294741014  
46 294742019  
47 294743012  
48 294744018  
49 294750011  
50 294751010  
51 294753013

For peer review only

1  
2 294754019  
3 294757014  
4 294758016  
5 294760019  
6 294764011  
7 294765012  
8 294766013  
9 294767016  
10 294768014  
11 294769018  
12 294771018  
13 294773015  
14 294787015  
15 294788013  
16 294789017  
17 294790014  
18 296022017  
19 296031017  
20 296040018  
21 296095012  
22 296096013  
23 346955013  
24 401763015  
25 401764014  
26 401855010  
27 1219653018  
28 1234861017  
29 78531000006116  
30 123611000006110  
31 155141000006116  
32 155161000006117  
33 169061000006112  
34 366571000006114  
35 367951000006113  
36 367971000006115  
37 368001000006112  
38 368011000006110  
39 370451000006110  
40 370631000006117  
41 371031000006115  
42 376251000006112  
43 378051000006119  
44 388741000006110  
45 395021000006111  
46 395031000006114  
47 398631000006113  
48 418221000006118  
49 418261000006112  
50 423041000006119  
51 423271000006116

For peer review only

1  
2 423471000006117  
3 423731000006114  
4 423741000006116  
5 424841000006113  
6 424931000006113  
7 425501000006113  
8 425511000006111  
9 425521000006115  
10 425541000006110  
11 425551000006112  
12 425561000006114  
13 425571000006119  
14 425581000006116  
15 425601000006114  
16 425631000006118  
17 425641000006111  
18 425651000006113  
19 425671000006115  
20 425681000006117  
21 425691000006119  
22 425701000006119  
23 425711000006116  
24 426881000006111  
25 456731000006115  
26 456801000006115  
27 556631000006116  
28 819351000006115  
29 882281000006113  
30 882291000006111  
31 1971471000006117  
32 1972011000006110  
33 1972261000006117  
34 1972861000006118  
35 1973051000006118  
36 1973581000006116  
37 1973831000006119  
38 1974351000006118  
39 1974391000006112  
40 1974431000006118  
41 1974451000006113  
42 1974481000006117  
43 1974541000006112  
44 1974601000006111  
45 1974611000006114  
46 1974621000006118  
47 1974641000006113  
48 1974671000006117  
49 1974721000006114  
50 1974751000006117  
51 1974781000006113

For peer review only



1  
2 1974801000006112  
3 1974831000006116  
4 1974861000006113  
5 1974921000006111  
6 1975051000006119  
7 1975141000006117  
8 1975191000006114  
9 1975211000006110  
10 1975231000006116  
11 1975261000006113  
12 1975281000006115  
13 1975301000006116  
14 1975321000006114  
15 1975351000006117  
16 1975381000006113  
17 1975401000006113  
18 1975431000006117  
19 1975441000006110  
20 1975481000006116  
21 1975491000006118  
22 1975501000006114  
23 1975521000006116  
24 1975551000006113  
25 1975571000006115  
26 1975641000006112  
27 1975751000006116  
28 1975771000006114  
29 1975801000006111  
30 1975831000006115  
31 1975841000006113  
32 1975911000006119  
33 1976001000006113  
34 1976061000006114  
35 1976101000006112  
36 1976121000006119  
37 1976141000006114  
38 1976171000006118  
39 1976881000006112  
40 1976891000006110  
41 1976901000006114  
42 1976911000006112  
43 1976931000006118  
44 1976941000006111  
45 1976951000006113  
46 1976961000006110  
47 3000261000006112  
48 3068121000006112  
49 3118041000006112  
50 3137261000006111  
51 3862661000006112

For peer review only

1 3946141000006118  
2 4082931000006110  
3 4539931000006112  
4 4763641000006116  
5 4763911000006114  
6 4763921000006118  
7 5023901000006110  
8 5248961000006113  
9 5517971000006118  
10 6890801000006117  
11 12480451000006112  
12 10122017  
13 119579013  
14 294662017  
15 294673012  
16 294675017  
17 294676016  
18 294693016  
19 294714016  
20 294721016  
21 294897018  
22 294902017  
23 294913019  
24 294917018  
25 294924017  
26 294941015  
27 294944011  
28 346897015  
29 401768012  
30 401771016  
31 401772011  
32 401862018  
33 1227584015  
34 215851000000112  
35 223601000000119  
36 223611000000117  
37 300411000000110  
38 300931000000113  
39 359091000006115  
40 359161000006110  
41 362781000006116  
42 362981000006119  
43 366551000006116  
44 367061000006114  
45 367991000006119  
46 370981000006112  
47 376271000006119  
48 376281000006116  
49 377461000006113  
50 379901000006113

For peer review only

1  
2 389451000006110  
3 389681000006116  
4 394681000006119  
5 394691000006116  
6 396771000006117  
7 396781000006119  
8 396801000006115  
9 397581000006111  
10 397621000006111  
11 397641000006116  
12 397661000006117  
13 397691000006113  
14 404041000006111  
15 424071000006112  
16 424281000006115  
17 424511000006112  
18 426951000006112  
19 426981000006116  
20 428441000006116  
21 476741000006111  
22 630831000006113  
23 753331000006118  
24 853201000006116  
25 1821481000006114  
26 2502581000000119  
27 3504751000006114  
28 3627341000006115  
29 3630121000006110  
30 3630151000006118  
31 4763211000006118  
32 4763231000006112  
33 4764511000006119  
34 5023531000006114  
35 5023541000006116  
36 5106071000006112  
37 6348061000006115  
38 6515001000006117  
39 6519941000006116  
40 7766271000006113  
41 7790241000006117  
42 7822921000006111  
43 8028531000006112  
44 8089301000006110  
45 8342781000006115  
46 8365411000006116  
47 12115591000006111  
48 12736721000006110  
49 14333601000006113  
50 296110017  
51 882321000006119

For peer review only

1  
2 2730071000000117  
3 2730091000000118  
4 294802018  
5 294803011  
6 294804017  
7 294805016  
8 294807012  
9 294809010  
10 294810017  
11 294811018  
12 294812013  
13 294813015  
14 294818012  
15 294847017  
16 294848010  
17 294849019  
18 294850019  
19 294858014  
20 294860011  
21 294891017  
22 294892012  
23 294893019  
24 294896010  
25 296118012  
26 401765010  
27 401864017  
28 1780205015  
29 2157096015  
30 182861000006110  
31 182871000006115  
32 367081000006116  
33 367111000006110  
34 367151000006111  
35 396071000006119  
36 396741000006113  
37 396761000006112  
38 396791000006116  
39 424661000006111  
40 513741000006119  
41 513801000006112  
42 789221000006116  
43 851691000006114  
44 882311000006110  
45 1971601000006113  
46 1972091000006117  
47 1972351000006113  
48 1972961000006114  
49 1973061000006116  
50 1973121000006111  
51 1973751000006115

For peer review only

1  
2 1973991000006111  
3 1974791000006111  
4 1975411000006111  
5 1975701000006115  
6 3006671000006118  
7  
8 3447781000006113  
9 5023961000006111  
10 5649431000006118  
11 5688921000006114  
12 5688931000006112  
13  
14 12059211000006119  
15 294861010  
16 294862015  
17 294863013  
18 294868016  
19 294869012  
20 294870013  
21 294871012  
22 294872017  
23 294877011  
24 294880012  
25 294881011  
26 294882016  
27 294883014  
28 294888017  
29 294895014  
30 296135011  
31 401865016  
32 82091000006116  
33 367091000006118  
34 367101000006112  
35 367121000006119  
36 367161000006113  
37 398541000006116  
38 513711000006118  
39 513751000006117  
40 513871000006118  
41 701051000006118  
42 701071000006111  
43 1785851000006110  
44 1785861000006112  
45 1785871000006117  
46 1972101000006111  
47 1975931000006113  
48 1975941000006115  
49 2652251000000113  
50 3854401000006113  
51 4767311000006117  
52 5023451000006115  
53 5435901000006117  
54  
55  
56  
57  
58  
59  
60

For peer review only

1 5933701000006116  
2 6891981000006111  
3 8041781000006111  
4 8235161000006110  
5 12059201000006117  
6 12059221000006110  
7 13716031000006110  
8 13911951000006118  
9 1780423014  
10 1780425019  
11 851561000006119  
12 940461000006119  
13 940471000006114  
14 1807681000006114  
15 4082431000006119  
16 5513141000006117  
17 6047261000006111  
18 6650041000006113  
19 13796551000006113  
20 3062551000006110  
21 5253131000006114  
22 5272841000006115  
23 4764871000006114  
24 295017014  
25 296254015  
26 296255019  
27 269821000006113  
28 400321000006113  
29 4764881000006112  
30 94597012  
31 251631011  
32 317233013  
33 317235018  
34 372208017  
35 363321000006111  
36 366521000006113  
37 960281000006115  
38 3423851000006118  
39 3799251000006119  
40 3799261000006117  
41 12717671000006110  
42 1222496015  
43 366541000006118  
44 368051000006111  
45 368061000006113  
46 527421000006116  
47 3027091000006119  
48 3468921000006116  
49 8039381000006110  
50 295436010

For peer review only

1  
2 295437018  
3 295451018  
4 295452013  
5 296361019  
6 296379015  
7 401889011  
8 1780181019  
9 577901000006119  
10 664031000000110  
11 882611000006115  
12 988931000006112  
13 1620911000006112  
14 1664151000006114  
15 1764491000006116  
16 1776641000006112  
17 1911761000006111  
18 2308361000000115  
19 2451711000000111  
20 2652391000000113  
21 5550181000006114  
22 6025191000006115  
23 6452531000006114  
24 7079921000006119  
25 7230101000006110  
26 7567401000006119  
27 8274831000006110  
28 8440231000006115  
29 14232971000006112  
30  
31  
32  
33  
34  
35  
36  
37  
38  
39  
40  
41  
42  
43  
44  
45  
46  
47  
48  
49  
50  
51  
52  
53  
54  
55  
56  
57  
58  
59  
60

For peer review only

1 Term

2 On severe mental illness register

3 Severe mental illness monitoring administration

4 Severe mental illness monitoring invite 1

5 Severe mental illness monitoring invite 2

6 Severe mental illness monitoring invite 3

7 Severe mental illness - enhanced services administration

8 Severe mental illness - enhanced service completed

9 Severe mental illness enhanced services administration

10 Patient suffering from severe mental impairment under Mental Health Act 1983

11 Single manic episode, severe, with psychosis

12 Recurrent manic episodes, severe, with psychosis

13 Single major depressive episode, severe, with psychosis

14 Recurrent major depressive episodes, severe, with psychosis

15 Mixed bipolar affective disorder, severe, with psychosis

16 [X]Severe depressive episode without psychotic symptoms

17 [X]Severe depressive episode with psychotic symptoms

18 Severe bipolar disorder without psychotic features

19 Severe bipolar disorder with psychotic features

20 Severe depressed bipolar I disorder without psychotic features

21 Bipolar affective disorder, currently manic, severe, with psychosis

22 [X]Recurr depress disorder cur epi severe without psyc sympt

23 [X]Recurr severe episodes/major depression+psychotic symptom

24 [X]Recurr severe episodes/psychogenic depressive psychosis

25 [X]Recurrent depress disorder cur epi severe with psyc symp

26 [X]Recurrent severe episodes of psychotic depression

27 Recurrent reactive depressive episodes, severe, with psychosis

28 Severe manic bipolar I disorder without psychotic features

29 Bipolar affect disord, currently manic,severe with psychosis

30 Bipolar affect disord, now depressed, severe with psychosis

31 Bipolar affect disord, now depressed, severe, no psychosis

32 Severe major depression with psychotic features

33 Severe major depression without psychotic features

34 [X]Single major depressive episode, severe, with psychosis, psychosis in remission

35 [X]Recurrent major depressive episodes, severe, with psychosis, psychosis in remission

36 Recurrent depression with current severe episode and psychotic features

37 Recurrent depression with current severe episode without psychotic features

38 Severe recurrent major depression with psychotic features

39 Severe recurrent major depression without psychotic features

40 Severe bipolar I disorder, most recent episode depressed with psychotic features

41 Severe major depression, single episode, without psychotic features

42 Severe major depression, single episode, with psychotic features, mood-congruent

43 Severe postnatal psychosis

44 Severe major depression, single episode, with psychotic features

45 Major depressive disorder, single episode, severe with psychotic features

46 Single major depressive episode, severe, with psychosis, psychosis in remission

47 Recurrent major depressive episodes, severe, with psychosis, psychosis in remission

48 Acute hysterical psychosis

49 [X]Other acute and transient psychotic disorders

50 [X]Other acute predominantly delusional psychotic disorders



- 1
- 2 [X]Acute and transient psychotic disorder, unspecified
- 3 [X]Acute / subacute infective psychosis
- 4 Acute transient psychotic disorder
- 5 Acute polymorphic psychotic disorder co-occurrent with symptoms of schizophrenia
- 6 Acute polymorphic psychotic disorder without symptoms of schizophrenia
- 7 Acute schizophrenia-like psychotic disorder
- 8 Acute schizo affective psychosis
- 9
- 10 Accom status - NHS acute psychiatric ward
- 11 Acute polymorphic psychot disord without symp of schizoph, without associated acute stress
- 12 Acute polymorphic psychot disord without symp of schizoph, with associated acute stress
- 13 Acute polymorphic psychot disord with symp of schizophren, without associated acute stress
- 14 Acute polymorphic psychot disord with symp of schizophren, with associated acute stress
- 15 Acute schizophrenia-like psychotic disorder, without associated acute stress
- 16 Acute schizophrenia-like psychotic disorder, with associated acute stress
- 17 Other acute predominantly delusional psychotic disorders, without associated acute stress
- 18 Other acute predominantly delusional psychotic disorders, with associated acute stress
- 19 Other acute and transient psychotic disorders, without associated acute stress
- 20 Other acute and transient psychotic disorders, with associated acute stress
- 21 Acute and transient psychotic disorder, unspecified, without associated acute stress
- 22 Acute and transient psychotic disorder, unspecified, with associated acute stress
- 23 Acute predominantly delusional psychotic disorder
- 24 Acute polymorphic psychotic disorder
- 25 Acute polymorphic psychotic disorder with symptoms of schizophrenia
- 26 Nervous breakdown
- 27 Subchronic schizophrenia
- 28 Residual schizophrenia
- 29 Chronic paranoid schizophrenia
- 30 Subchronic catatonic schizophrenia
- 31 Paranoid schizophrenia
- 32 Chronic catatonic schizophrenia
- 33 Subchronic paranoid schizophrenia
- 34 Schizophrenic disorders
- 35 Schizophrenia simplex
- 36 Simple schizophrenia
- 37 Unspecified schizophrenia
- 38 Acute exacerbation of subchronic schizophrenia
- 39 Acute exacerbation of chronic schizophrenia
- 40 Simple schizophrenia NOS
- 41 Unspecified hebephrenic schizophrenia
- 42 Subchronic hebephrenic schizophrenia
- 43 Chronic hebephrenic schizophrenia
- 44 Acute exacerbation of subchronic hebephrenic schizophrenia
- 45 Acute exacerbation of chronic hebephrenic schizophrenia
- 46 Hebephrenic schizophrenia NOS
- 47 Catatonic schizophrenia
- 48 [X]Schizophrenic flexibilatis cerea
- 49 Unspecified catatonic schizophrenia
- 50 Acute exacerbation of subchronic catatonic schizophrenia
- 51 Acute exacerbation of chronic catatonic schizophrenia
- 52 Catatonic schizophrenia NOS
- 53
- 54
- 55
- 56
- 57
- 58
- 59
- 60

1 Unspecified paranoid schizophrenia  
2 Acute exacerbation of subchronic paranoid schizophrenia  
3 Acute exacerbation of chronic paranoid schizophrenia  
4 Paranoid schizophrenia NOS  
5 Latent schizophrenia  
6 Unspecified latent schizophrenia  
7 Subchronic latent schizophrenia  
8 Chronic latent schizophrenia  
9 Acute exacerbation of subchronic latent schizophrenia  
10 Acute exacerbation of chronic latent schizophrenia  
11 Latent schizophrenia NOS  
12 Cyclic schizophrenia  
13 Coenesthopathic schizophrenia  
14 Cenesthopathic schizophrenia  
15 Other schizophrenia NOS  
16 Schizophrenia  
17 [X]Schizophrenia, schizotypal and delusional disorders  
18 Undifferentiated schizophrenia  
19 [X]Schizophrenia, unspecified  
20 [X]Other schizoaffective disorders  
21 [X]Schizoaffective disorder, unspecified  
22 Childhood schizophrenia NOS  
23 Acute schizophrenic episode  
24 Other schizophrenia  
25 [X]Other schizophrenia  
26 Atypical schizophrenia  
27 Chronic schizophrenic  
28 Unspecified schizo-affective schizophrenia  
29 Subchronic schizo-affective schizophrenia  
30 Schizoaffective schizophrenia  
31 Schizo-affective schizophrenia NOS  
32 Restzustand - schizophrenia  
33 [X]Atypical schizophrenia  
34 Borderline schizophrenia  
35 [X]Bouffee delirante with symptoms of schizophrenia  
36 [X]Brief schizophreniform disorder  
37 [X]Brief schizophreniform psych  
38 [X]Catatonic schizophrenia  
39 [X]Cenesthopathic schizophrenia  
40 [X]Chronic undifferentiated schizophrenia  
41 [X]Cyclic schizophrenia  
42 [X]Disorganised schizophrenia  
43 [X]Hebephrenic schizophrenia  
44 [X]Latent schizophrenia  
45 [X]Latent schizophrenic reaction  
46 Mixed schizophrenic and affective psychosis  
47 [X]Paranoid schizophrenia  
48 [X]Paraphrenic schizophrenia  
49 [X]Post-schizophrenic depression  
50 Prepsychotic schizophrenia

- 1
- 2 Prodromal schizophrenia
- 3 [X]Pseudoneurotic schizophrenia
- 4 [X]Pseudopsychopathic schizophrenia
- 5 [X]Residual schizophrenia
- 6 [X]Restzustand schizophrenic
- 7 Schizoaffective disorder, depressive type
- 8 Schizoaffective disorder, manic type
- 9 Schizoaffective disorder, mixed type
- 10 Schizoaffective disorder
- 11 [X]Schizoaffective psychosis NOS
- 12 [X]Schizoaffective psychosis, depressive type
- 13 [X]Schizoaffective psychosis, manic type
- 14 [X]Schizoid disorder of childhood
- 15 [X]Schizophrenia
- 16 [X]Schizophrenia-like psychosis in epilepsy
- 17 [X]Schizophrenic catalepsy
- 18 [X]Schizophrenic catatonia
- 19 [X]Schizophrenic reaction
- 20 [X]Schizophreniform disord NOS
- 21 [X]Schizophreniform psychosis, depressive type
- 22 [X]Schizophreniform psychosis, manic type
- 23 [X]Schizophrenifrm psychos NOS
- 24 [X]Simple schizophrenia
- 25 Acute exacerbation of chronic schizo-affective schizophrenia
- 26 Acute exacerbation subchronic schizo-affective schizophrenia
- 27 Chronic schizoaffective schizophrenia
- 28 Hebephrenic schizophrenia
- 29 Schizophrenic psychoses NOS
- 30 Schizophrenic psychoses
- 31 Mental & behav dis due to use opioids: psychotic disorder, schizophrenia-like
- 32 Mental & behav dis due to hallucinogens: psychotic disord, schizophrenia-like
- 33 Mental & behav dis due to cannabinoids: psychotic disordr, schizophrenia-like
- 34 Mental & behav dis due to seds/hypntcs: psychotic disordr, schizophrenia-like
- 35 Mental & behav dis due to vol solvents: psychotic disordr, schizophrenia-like
- 36 Mental & behav dis due to use cocaine: psychotic disorder, schizophrenia-like
- 37 Ment/behav dis mlti drug use/oth psyc sbs: psychotc dis, schizophrenia-like
- 38 Paranoid schizophrenia, continuous
- 39 Paranoid schizophrenia, episodic with progressive deficit
- 40 Paranoid schizophrenia, episodic with stable deficit
- 41 Paranoid schizophrenia, episodic remittent
- 42 Paranoid schizophrenia, incomplete remission
- 43 Paranoid schizophrenia, course uncertain, period of observation too short
- 44 Hebephrenic schizophrenia, continuous
- 45 Hebephrenic schizophrenia, episodic with progressive deficit
- 46 Hebephrenic schizophrenia, episodic with stable deficit
- 47 Hebephrenic schizophrenia, episodic remittent
- 48 Hebephrenic schizophrenia, incomplete remission
- 49 Hebephrenic schizophrenia, course uncertain, period of observation too short
- 50 Catatonic schizophrenia, continuous
- 51 Catatonic schizophrenia, episodic with progressive deficit

1 Catatonic schizophrenia, episodic with stable deficit  
2 Catatonic schizophrenia, episodic remittent  
3 Catatonic schizophrenia, incomplete remission  
4 Catatonic schizophrenia, course uncertain, period of observation too short  
5 Undifferentiated schizophrenia, incomplete remission  
6 Mental & behav dis due to use alcohol: psychotic disorder, schizophrenia-like  
7 Post-schizophrenic depression, continuous  
8 Post-schizophrenic depression, episodic with progressive deficit  
9 Post-schizophrenic depression, episodic with stable deficit  
10 Post-schizophrenic depression, episodic remittent  
11 Post-schizophrenic depression, incomplete remission  
12 Post-schizophrenic depression, complete remission  
13 Post-schizophrenic depression, course uncertain, period of observation too short  
14 Residual schizophrenia, continuous  
15 Residual schizophrenia, episodic with progressive deficit  
16 Residual schizophrenia, episodic with stable deficit  
17 Residual schizophrenia, episodic remittent  
18 Residual schizophrenia, incomplete remission  
19 Residual schizophrenia, course uncertain, period of observation too short  
20 Simple schizophrenia, continuous  
21 Simple schizophrenia, episodic with progressive deficit  
22 Simple schizophrenia, episodic with stable deficit  
23 Simple schizophrenia, episodic remittent  
24 Simple schizophrenia, incomplete remission  
25 Simple schizophrenia, course uncertain, period of observation too short  
26 Other schizophrenia, continuous  
27 Other schizophrenia, episodic with progressive deficit  
28 Other schizophrenia, episodic with stable deficit  
29 Other schizophrenia, episodic remittent  
30 Other schizophrenia, incomplete remission  
31 Other schizophrenia, course uncertain, period of observation too short  
32 Schizophrenia, unspecified, continuous  
33 Schizophrenia, unspecified, episodic with progressive deficit  
34 Schizophrenia, unspecified, episodic with stable deficit  
35 Schizophrenia, unspecified, episodic remittent  
36 Schizophrenia, unspecified, incomplete remission  
37 Schizophrenia, unspecified, course uncertain, period of observation too short  
38 Paranoid schizophrenia, other  
39 Hebephrenic schizophrenia, other  
40 Catatonic schizophrenia, other  
41 Undifferentiated schizophrenia, other  
42 Residual schizophrenia, other  
43 Simple schizophrenia, other  
44 Other schizophrenia, other  
45 Schizophrenia, unspecified, other  
46 Schizotypal disorder  
47 Disorganised schizophrenia  
48 Schizoaffective disorder, bipolar type  
49 Undifferentiated schizophrenia in remission  
50 Chronic schizophrenia

- 1 Schizophreniform disorder
- 2 Schizophrenic reaction
- 3 History of schizophrenia
- 4 Acute exacerbation of chronic disorganised schizophrenia
- 5 Acute exacerbation of subchronic schizoaffective schizophrenia
- 6 Acute exacerbation of chronic schizoaffective schizophrenia
- 7 Post-schizophrenic depression
- 8 Schizophrenic prodrome
- 9 Mixed schizophrenic and affective psychosis
- 10 Late onset schizophrenia
- 11 [X]Schizophrenia, schizotypal and delusional disorders
- 12 Brief reactive psychosis
- 13 Disintegrative psychosis
- 14 Korsakov's alcoholic psychosis with peripheral neuritis
- 15 Other alcoholic psychosis
- 16 Other alcoholic psychosis NOS
- 17 Alcoholic psychosis NOS
- 18 Drug psychosis NOS
- 19 Postpartum psychosis
- 20 Chronic organic psychosis NOS
- 21 Affective psychosis
- 22 Other affective psychosis NOS
- 23 Paranoid psychosis
- 24 Reactive depressive psychosis
- 25 Psychogenic paranoid psychosis
- 26 Disintegrative psychosis NOS
- 27 Borderline psychosis of childhood
- 28 Presbyophrenic psychosis
- 29 Chronic paranoid psychosis
- 30 Non-organic psychosis NOS
- 31 Child psychosis NOS
- 32 [X]Unspecified nonorganic psychosis
- 33 [V]Personal history of manic-depressive psychosis
- 34 [X]Paranoid psychosis
- 35 Manic psychosis
- 36 Non-organic psychosis
- 37 H/O: psychosis
- 38 Referral to psychosis early intervention service
- 39 [X] Presenile psychosis NOS
- 40 [X] Senile psychosis NOS
- 41 [X]Affective psychosis NOS
- 42 [X]Alcoholic psychosis NOS
- 43 [X]Atypical childhood psychosis
- 44 Psychosis and severe depression co-occurrent and due to bipolar affective disorder
- 45 [X]Brief reactive psychosis NOS
- 46 [X]Chronic hallucinatory psychosis
- 47 [X]Cycloid psychosis
- 48 Cycloid psychosis
- 49 [X]Disintegrative psychosis
- 50 [X]Epileptic psychosis NOS

1 [X]Hysterical psychosis  
2 [X]Infantile psychosis  
3 Korsakoff's psychosis  
4 [X]Korsakov's psychosis, nonalcoholic  
5 [X] Manic-depressive psychosis, depressed type without psychotic symptoms  
6 [X]Manic-depress psychosis,depressed type+psychotic symptoms  
7 Manic-depressive psychosis  
8 Cannabis-induced psychosis  
9 Alcohol-induced psychosis  
10 Cocaine-induced psychosis  
11 Opioid-induced psychosis  
12 Volatile inhalant-induced psychosis  
13 [X]Organic psychosis NOS  
14 [X]Psychogenic paranoid psychosis  
15 [X]Puerperal psychosis NOS  
16 [X]Reactive psychosis  
17 [X]Single episode of psychogenic depressive psychosis  
18 [X]Single episode of reactive depressive psychosis  
19 [X]Symbiotic psychosis  
20 Alcohol-induced psychosis  
21 Drug psychosis  
22 Korsakov alcoholic psychosis  
23 Obsessional compulsive psychosis  
24 Possible early psychosis  
25 CBTp - cognitive behavioural therapy for psychosis  
26 Induced psychosis  
27 Psychosis  
28 Korsakoff psychosis  
29 Korsakov psychosis  
30 Drug-induced psychosis  
31 Drug induced psychosis  
32 Psychosis with origin in childhood  
33 Epileptic psychosis  
34 Psychosis associated with intensive care  
35 Mild postnatal psychosis  
36 Senile dementia with psychosis  
37 Early intervention in psychosis  
38 Early intervention in psychosis - <1 contact/month  
39 Cognitive behavioural therapy for psychosis  
40 Psychosis co-occurrent and due to Parkinson's disease  
41 Provision of information about psychosis  
42 Early intervention in psychosis team  
43 Reactive depressive psychosis, single episode  
44 Psychoactive substance-induced psychosis  
45 Family intervention for psychosis  
46 Referral for cognitive behavioural therapy for psychosis  
47 FEP - first episode psychosis  
48 Family intervention for psychosis and bipolar disorder  
49 Mania  
50 Mania/hypomania

- 1
- 2 Mania with mood-incongruent psychotic features
- 3 Mania with psychotic features
- 4 Single manic episode, unspecified
- 5 Single manic episode, mild
- 6 Single manic episode, moderate
- 7 Single manic episode, severe
- 8 Single manic episode in partial remission
- 9 Manic disorder, single episode NOS
- 10 Recurrent manic episodes
- 11 Recurrent manic episodes, unspecified
- 12 Recurrent manic episodes, mild
- 13 Recurrent manic episodes, moderate
- 14 Recurrent manic episode NOS
- 15 Manic-depressive - now manic
- 16 Bipolar affective disorder, currently manic, unspecified
- 17 Bipolar affective disorder, currently manic, mild
- 18 Bipolar affective disorder, currently manic, moderate
- 19 Bipolar affective disorder, currently manic, NOS
- 20 Manic-depressive - now depressed
- 21 Other and unspecified manic-depressive psychoses
- 22 Unspecified manic-depressive psychoses
- 23 Atypical manic disorder
- 24 Other and unspecified manic-depressive psychoses NOS
- 25 [X]Other manic episodes
- 26 Manic disorder, single episode
- 27 [X]Manic episode, unspecified
- 28 H/O: manic depressive disorder
- 29 Manic mood
- 30 Recurrent manic episodes, in partial remission
- 31 Recurrent manic episodes, severe
- 32 [X]Bipolar affect disorder cur epi manic wout psychotic symp
- 33 Bipolar affective disorder, current episode hypomanic
- 34 [X]Bipolar disorder, single manic episode
- 35 [X]Manic-depressive reaction
- 36 [X]Manic episode
- 37 [X]Manic stupor
- 38 Manic-depressive illness
- 39 [X]Recurrent manic episodes
- 40 Manic bipolar I disorder in partial remission
- 41 Bipolar affective disorder, current episode manic
- 42 Hypomanic psychoses
- 43 Hypomanic
- 44 Manic-depressive psychoses
- 45 Mental & behav dis due to use opioids: psychotic disorder, predominantly manic symptoms
- 46 Organic manic disorder
- 47 Mental & behav dis due to cannabinoids: psychotic disordr, predominantly manic symptoms
- 48 Mental & behav dis due to seds/hypntcs: psychotic disordr, predominantly manic symptoms
- 49 Mental & behav dis due to hallucinogens: psychotic disord, predominantly manic symptoms
- 50 Mental & behav dis due to vol solvents: psychotic disordr, predominantly manic symptoms
- 51 Mental & behav dis due to use cocaine: psychotic disorder, predominantly manic symptoms
- 52
- 53
- 54
- 55
- 56
- 57
- 58
- 59
- 60



1 Ment/behav dis mlti drug use/oth psyc sbs: psychotc dis, predominantly manic symptoms  
2 Mental & behav dis due to use tobacco: psychotic disorder, predominantly manic symptoms  
3 Mental & behav dis due to use alcohol: psychotic disorder, predominantly manic symptoms  
4 Mental and behav dis due to other stimulants inc caffeine: psychotic dis, predominantly manic symptom  
5  
6 Bipolar I disorder, most recent episode hypomanic  
7  
8 Organic mood disorder of manic type  
9 Manic  
10 Hypomanic mood  
11 Manic behaviour  
12 Manic behavior  
13 Bipolar disorder, most recent episode manic  
14 Bipolar affective disorder, currently depressed, unspecified  
15 Bipolar affective disorder, currently depressed, mild  
16 Bipolar affective disorder, currently depressed, moderate  
17 Bipolar affective disorder, currently depressed, NOS  
18 Mixed bipolar affective disorder  
19 Mixed bipolar affective disorder, unspecified  
20 Mixed bipolar affective disorder, mild  
21 Mixed bipolar affective disorder, moderate  
22 Mixed bipolar affective disorder, NOS  
23 Unspecified bipolar affective disorder  
24 Unspecified bipolar affective disorder, unspecified  
25 Mild bipolar disorder  
26 Moderate bipolar disorder  
27 Unspecified bipolar affective disorder, NOS  
28 Mixed bipolar I disorder  
29 [X]Bipolar affective disorder, unspecified  
30 [X]Other bipolar affective disorders  
31 Bipolar disorder in partial remission  
32 [X]Bipolar affect disorder cur epi mild or moderate depressn  
33 Bipolar affective disorder  
34 [X]Bipolar affective disorder, current episode mixed  
35 [X]Bipolar II disorder  
36 Bipolar affective disorder , current episode mixed  
37 Depressed bipolar I disorder in partial remission  
38 Bipolar affective disorder, current episode depression  
39 Bipolar disorder  
40 Mixed bipolar affective disorder, partial/unspec remission  
41 Mixed bipolar affective disorder, severe  
42 Bipolar I disorder  
43 Bipolar II disorder  
44 [X]Bipolar II disorder  
45 Organic bipolar affective disorder  
46 Bipolar affect disorder cur epi mild or moderate depressn, without somatic syndrome  
47 Bipolar affect disorder cur epi mild or moderate depressn, with somatic syndrome  
48 Signposting to Bipolar UK  
49 Bipolar 2 disorder  
50 Bipolar affective disorder, current episode mixed  
51 Organic bipolar disorder  
52 Bipolar



1  
2 Profile of mood states, bipolar  
3 Referral for bipolar disorder  
4 Rapid cycling bipolar I disorder  
5 Mixed bipolar affective disorder, in partial remission  
6 Bipolar disorder, most recent episode depression  
7 Bipolar affective disorder, most recent episode mixed  
8 Bipolar disorder caused by drug  
9 Rapid cycling bipolar II disorder  
10 Thoughts of deliberate self harm  
11 Intent of deliberate self harm with detailed plans  
12 Risk of deliberate self harm  
13 H/O: deliberate self harm outside prison  
14 H/O: deliberate self harm within prison  
15 High risk of deliberate self harm  
16 Thoughts of self harm  
17 Suicide and self harm  
18 History of deliberate self harm  
19 At risk for deliberate self harm  
20 Obsessional thoughts of causing self harm  
21 Self-induced vomiting  
22 Self-induced purging to lose weight  
23 Self-induced purging  
24 OCD - Obsessive-compulsive disorder  
25 Obsessive-compulsive disorder NOS  
26 [X]Other obsessive-compulsive disorders  
27 [X]Obsessive-compulsive disorder, unspecified  
28 Obsessive-compulsive disorder  
29 [X]Obsessive - compulsive disorder  
30 Obsessive compulsive disorder  
31 Anorexia nervosa  
32 H/O: anorexia nervosa  
33 [D]Anorexia  
34 [D]Anorexia NOS  
35 Anorexia symptom  
36 [X]Anorexia nervosa  
37 Atypical anorexia nervosa  
38 Anorexia  
39 AN - Anorexia nervosa  
40 Anorexia  
41 Anorexic  
42 [D]Anorexia  
43 Bulimia  
44 Atypical bulimia nervosa  
45 Bulimia nervosa  
46 [X]Bulimia NOS  
47 Bulimia (non-organic overeating)  
48 Bulimia nervosa, purging type  
49 Bulimia nervosa, nonpurging type  
50 History of bulimia nervosa  
51 Other and unspecified non-organic eating disorders

1 Unspecified non-organic eating disorder  
2 Other specified non-organic eating disorder  
3 Non-organic eating disorder NOS  
4 Eating disorder  
5 [X]Eating disorder, unspecified  
6 [X]Other eating disorders  
7 Referral to eating disorders clinic  
8 Compulsive eating disorder  
9 Seen in eating disorder clinic  
10 Eating disorder NOS - psychog.  
11 Eating disorder NOS - psychog.  
12 Eating disorders  
13 Seen in eating disorders clinic  
14 Referral to eating disorders outreach clinic  
15 Reason for referral: Eating Disorder  
16 FACE CARAS - Eating Disorder Schedule (FEDS)  
17 Suspected binge eating disorder  
18 Eating disorder care plan  
19 Signposting to Beat (beating eating disorders) support group  
20 Eating disorders inventory  
21 Eating disorder counselling  
22 Eating disorders management  
23 Dietary education for eating disorder  
24 Binge eating disorder  
25 Eating disorder clinic  
26 Eating disorders service  
27 Eating disorder co-occurrent with diabetes mellitus type 1  
28 Group CBT-ED (cognitive behavioural therapy for eating disorder)  
29  
30  
31  
32  
33  
34  
35  
36  
37  
38  
39  
40  
41  
42  
43  
44  
45  
46  
47  
48  
49  
50  
51  
52  
53  
54  
55  
56  
57  
58  
59  
60

1  
2  
3  
4  
5  
6  
7  
8  
9  
10  
11  
12  
13  
14  
15  
16  
17  
18  
19  
20  
21  
22  
23  
24  
25  
26  
27  
28  
29  
30  
31  
32  
33  
34  
35  
36  
37  
38  
39  
40  
41  
42  
43  
44  
45  
46  
47  
48  
49  
50  
51  
52  
53  
54  
55  
56  
57  
58  
59  
60

For peer review only

1  
2  
3  
4  
5  
6  
7  
8  
9  
10  
11  
12  
13  
14  
15  
16  
17  
18  
19  
20  
21  
22  
23  
24  
25  
26  
27  
28  
29  
30  
31  
32  
33  
34  
35  
36  
37  
38  
39  
40  
41  
42  
43  
44  
45  
46  
47  
48  
49  
50  
51  
52  
53  
54  
55  
56  
57  
58  
59  
60

For peer review only

1  
2  
3  
4  
5  
6  
7  
8  
9  
10  
11  
12  
13  
14  
15  
16  
17  
18  
19  
20  
21  
22  
23  
24  
25  
26  
27  
28  
29  
30  
31  
32  
33  
34  
35  
36  
37  
38  
39  
40  
41  
42  
43  
44  
45  
46  
47  
48  
49  
50  
51  
52  
53  
54  
55  
56  
57  
58  
59  
60

For peer review only

1  
2  
3  
4  
5  
6  
7  
8  
9  
10  
11  
12  
13  
14  
15  
16  
17  
18  
19  
20  
21  
22  
23  
24  
25  
26  
27  
28  
29  
30  
31  
32  
33  
34  
35  
36  
37  
38  
39  
40  
41  
42  
43  
44  
45  
46  
47  
48  
49  
50  
51  
52  
53  
54  
55  
56  
57  
58  
59  
60

For peer review only

1  
2  
3  
4  
5  
6  
7  
8  
9  
10  
11  
12  
13  
14  
15  
16  
17  
18  
19  
20  
21  
22  
23  
24  
25  
26  
27  
28  
29  
30  
31  
32  
33  
34  
35  
36  
37  
38  
39  
40  
41  
42  
43  
44  
45  
46  
47  
48  
49  
50  
51  
52  
53  
54  
55  
56  
57  
58  
59  
60

For peer review only

1  
2  
3  
4  
5  
6  
7  
8  
9  
10  
11  
12  
13  
14  
15  
16  
17  
18  
19  
20  
21  
22  
23  
24  
25  
26  
27  
28  
29  
30  
31  
32  
33  
34  
35  
36  
37  
38  
39  
40  
41  
42  
43  
44  
45  
46  
47  
48  
49  
50  
51  
52  
53  
54  
55  
56  
57  
58  
59  
60

For peer review only



1  
2  
3  
4  
5  
6  
7  
8  
9  
10  
11  
12  
13  
14  
15  
16  
17  
18  
19  
20  
21  
22  
23  
24  
25  
26  
27  
28  
29  
30  
31  
32  
33  
34  
35  
36  
37  
38  
39  
40  
41  
42  
43  
44  
45  
46  
47  
48  
49  
50  
51  
52  
53  
54  
55  
56  
57  
58  
59  
60

For peer review only

1  
2  
3  
4  
5  
6  
7  
8  
9  
10  
11  
12  
13  
14  
15  
16  
17  
18  
19  
20  
21  
22  
23  
24  
25  
26  
27  
28  
29  
30  
31  
32  
33  
34  
35  
36  
37  
38  
39  
40  
41  
42  
43  
44  
45  
46  
47  
48  
49  
50  
51  
52  
53  
54  
55  
56  
57  
58  
59  
60

For peer review only

1  
2  
3  
4  
5  
6  
7  
8  
9  
10  
11  
12  
13  
14  
15  
16  
17  
18  
19  
20  
21  
22  
23  
24  
25  
26  
27  
28  
29  
30  
31  
32  
33  
34  
35  
36  
37  
38  
39  
40  
41  
42  
43  
44  
45  
46  
47  
48  
49  
50  
51  
52  
53  
54  
55  
56  
57  
58  
59  
60

ms

For peer review only

|    |             |
|----|-------------|
| 1  |             |
| 2  | ICD-10 code |
| 3  | F06.0       |
| 4  | F06.1       |
| 5  | F06.2       |
| 6  | F06.3       |
| 7  | F06.4       |
| 8  | F06.5       |
| 9  | F06.6       |
| 10 | F06.6       |
| 11 | F10.1       |
| 12 | F10.2       |
| 13 | F10.3       |
| 14 | F10.4       |
| 15 | F10.5       |
| 16 | F10.6       |
| 17 | F10.7       |
| 18 | F10.8       |
| 19 | F10.9       |
| 20 | F10.9       |
| 21 | F11.1       |
| 22 | F11.2       |
| 23 | F11.3       |
| 24 | F11.4       |
| 25 | F11.5       |
| 26 | F11.6       |
| 27 | F11.7       |
| 28 | F11.8       |
| 29 | F11.9       |
| 30 | F11.9       |
| 31 | F12.1       |
| 32 | F12.2       |
| 33 | F12.3       |
| 34 | F12.4       |
| 35 | F12.5       |
| 36 | F12.6       |
| 37 | F12.7       |
| 38 | F12.8       |
| 39 | F12.9       |
| 40 | F12.9       |
| 41 | F13.1       |
| 42 | F13.2       |
| 43 | F13.3       |
| 44 | F13.4       |
| 45 | F13.5       |
| 46 | F13.6       |
| 47 | F13.7       |
| 48 | F13.8       |
| 49 | F13.9       |
| 50 | F13.9       |
| 51 | F14.1       |
| 52 | F14.2       |
| 53 | F14.3       |
| 54 | F14.4       |
| 55 | F14.5       |
| 56 | F14.6       |
| 57 | F14.6       |
| 58 | F14.6       |
| 59 | F14.6       |
| 60 | F14.6       |

For peer review only

- 1
- 2 F14.7
- 3 F14.8
- 4 F14.9
- 5 F15.1
- 6 F15.2
- 7 F15.3
- 8 F15.4
- 9 F15.5
- 10 F15.6
- 11 F15.7
- 12 F15.8
- 13 F15.9
- 14 F16.1
- 15 F16.2
- 16 F16.3
- 17 F16.4
- 18 F16.5
- 19 F16.6
- 20 F16.7
- 21 F16.8
- 22 F16.9
- 23 F17.1
- 24 F17.2
- 25 F17.3
- 26 F17.4
- 27 F17.5
- 28 F17.6
- 29 F17.7
- 30 F17.8
- 31 F17.9
- 32 F18.1
- 33 F18.2
- 34 F18.3
- 35 F18.4
- 36 F18.5
- 37 F18.6
- 38 F18.7
- 39 F18.8
- 40 F18.9
- 41 F19.1
- 42 F19.2
- 43 F19.3
- 44 F19.4
- 45 F19.5
- 46 F19.6
- 47 F19.7
- 48 F19.8
- 49 F19.9
- 50 F20.0
- 51 F20.1
- 52
- 53
- 54
- 55
- 56
- 57
- 58
- 59
- 60

For peer review only

1  
2 F20.2  
3 F20.3  
4 F20.4  
5 F20.5  
6 F20.6  
7 F20.8  
8 F20.9  
9 F21  
10 F22.0  
11 F22.8  
12 F22.9  
13 F23.0  
14 F23.1  
15 F23.2  
16 F23.3  
17 F23.8  
18 F23.9  
19 F24  
20 F25.0  
21 F25.1  
22 F25.2  
23 F25.8  
24 F25.9  
25 F28  
26 F29  
27 F30.0  
28 F30.1  
29 F30.2  
30 F30.8  
31 F30.9  
32 F31.0  
33 F31.1  
34 F31.2  
35 F31.3  
36 F31.4  
37 F31.5  
38 F31.6  
39 F31.7  
40 F31.8  
41 F31.9  
42 F32.2  
43 F32.3  
44 F32.8  
45 F32.9  
46 F33.2  
47 F33.3  
48 F33.8  
49 F33.9  
50 F34.0  
51 F34.1  
52  
53  
54  
55  
56  
57  
58  
59  
60

For peer review only

- 1
- 2 F34.8
- 3 F34.9
- 4 F38.0
- 5 F38.1
- 6 F38.8
- 7 F38.8
- 8 F39
- 9 F41.0
- 10 F41.1
- 11 F41.2
- 12 F41.3
- 13 F41.8
- 14 F41.9
- 15 F41.9
- 16 F42.0
- 17 F42.1
- 18 F42.2
- 19 F42.2
- 20 F42.8
- 21 F42.9
- 22 F43.1
- 23 F44.0
- 24 F44.1
- 25 F44.1
- 26 F44.2
- 27 F44.3
- 28 F44.4
- 29 F44.5
- 30 F44.6
- 31 F44.6
- 32 F44.7
- 33 F44.8
- 34 F44.9
- 35 F44.9
- 36 F48.1
- 37 F48.8
- 38 F48.9
- 39 F50.0
- 40 F50.1
- 41 F50.2
- 42 F50.3
- 43 F50.3
- 44 F50.8
- 45 F50.9
- 46 F50.9
- 47 F53.1
- 48 F53.8
- 49 F53.9
- 50
- 51
- 52
- 53
- 54
- 55
- 56
- 57
- 58
- 59
- 60

For peer review only

1  
2 Term

3 Organic hallucinosis

4 Organic catatonic disorder

5 Organic delusional [schizophrenia-like] disorder

6 Organic mood [affective] disorders

7 Organic anxiety disorder

8 Organic dissociative disorder

9 Organic emotionally labile [asthenic] disorder

10 Mental and behavioural disorders due to use of alcohol harmful use

11 Mental and behavioural disorders due to use of alcohol dependence syndrome

12 Mental and behavioural disorders due to use of alcohol withdrawal state

13 Mental and behavioural disorders due to use of alcohol withdrawal state with delirium

14 Mental and behavioural disorders due to use of alcohol psychotic disorder

15 Mental and behavioural disorders due to use of alcohol amnesic syndrome

16 Mental and behavioural disorders due to use of alcohol residual and late-onset psychotic disorder

17 Mental and behavioural disorders due to use of alcohol other mental and behavioural disorders

18 Mental and behavioural disorders due to use of alcohol unspecified mental and behavioural disorders

19 Mental and behavioural disorders due to use of opioids harmful use

20 Mental and behavioural disorders due to use of opioids dependence syndrome

21 Mental and behavioural disorders due to use of opioids withdrawal state

22 Mental and behavioural disorders due to use of opioids withdrawal state with delirium

23 Mental and behavioural disorders due to use of opioids psychotic disorder

24 Mental and behavioural disorders due to use of opioids amnesic syndrome

25 Mental and behavioural disorders due to use of opioids residual and late-onset psychotic disorder

26 Mental and behavioural disorders due to use of opioids other mental and behavioural disorders

27 Mental and behavioural disorders due to use of opioids unspecified mental and behavioural disorders

28 Mental and behavioural disorders due to use of cannabinoids harmful use

29 Mental and behavioural disorders due to use of cannabinoids dependence syndrome

30 Mental and behavioural disorders due to use of cannabinoids withdrawal state

31 Mental and behavioural disorders due to use of cannabinoids withdrawal state with delirium

32 Mental and behavioural disorders due to use of cannabinoids psychotic disorder

33 Mental and behavioural disorders due to use of cannabinoids amnesic syndrome

34 Mental and behavioural disorders due to use of cannabinoids residual and late-onset psychotic disorder

35 Mental and behavioural disorders due to use of cannabinoids other mental and behavioural disorders

36 Mental and behavioural disorders due to use of cannabinoids unspecified mental and behavioural disorders

37 Mental and behavioural disorders due to use of sedatives or hypnotics harmful use

38 Mental and behavioural disorders due to use of sedatives or hypnotics dependence syndrome

39 Mental and behavioural disorders due to use of sedatives or hypnotics withdrawal state

40 Mental and behavioural disorders due to use of sedatives or hypnotics withdrawal state with delirium

41 Mental and behavioural disorders due to use of sedatives or hypnotics psychotic disorder

42 Mental and behavioural disorders due to use of sedatives or hypnotics amnesic syndrome

43 Mental and behavioural disorders due to use of sedatives or hypnotics residual and late-onset psychotic disorder

44 Mental and behavioural disorders due to use of sedatives or hypnotics other mental and behavioural disorders

45 Mental and behavioural disorders due to use of sedatives or hypnotics unspecified mental and behavioural disorders

46 Mental and behavioural disorders due to use of cocaine harmful use

47 Mental and behavioural disorders due to use of cocaine dependence syndrome

48 Mental and behavioural disorders due to use of cocaine withdrawal state

49 Mental and behavioural disorders due to use of cocaine withdrawal state with delirium

50 Mental and behavioural disorders due to use of cocaine psychotic disorder

51 Mental and behavioural disorders due to use of cocaine amnesic syndrome



- 1
- 2 Mental and behavioural disorders due to use of cocaine residual and late-onset psychotic disorder
- 3 Mental and behavioural disorders due to use of cocaine other mental and behavioural disorders
- 4 Mental and behavioural disorders due to use of cocaine unspecified mental and behavioural disorders
- 5 Mental and behavioural disorders due to use of other stimulants, including caffeine harmful use
- 6 Mental and behavioural disorders due to use of other stimulants, including caffeine dependence syndrome
- 7 Mental and behavioural disorders due to use of other stimulants, including caffeine withdrawal state
- 8 Mental and behavioural disorders due to use of other stimulants, including caffeine withdrawal state with deli
- 9 Mental and behavioural disorders due to use of other stimulants, including caffeine psychotic disorder
- 10 Mental and behavioural disorders due to use of other stimulants, including caffeine amnesic syndrome
- 11 Mental and behavioural disorders due to use of other stimulants, including caffeine residual and late-onset py
- 12 Mental and behavioural disorders due to use of other stimulants, including caffeine other mental and behavio
- 13 Mental and behavioural disorders due to use of other stimulants, including caffeine unspecified mental and be
- 14 Mental and behavioural disorders due to use of hallucinogens harmful use
- 15 Mental and behavioural disorders due to use of hallucinogens dependence syndrome
- 16 Mental and behavioural disorders due to use of hallucinogens withdrawal state
- 17 Mental and behavioural disorders due to use of hallucinogens withdrawal state with delirium
- 18 Mental and behavioural disorders due to use of hallucinogens psychotic disorder
- 19 Mental and behavioural disorders due to use of hallucinogens amnesic syndrome
- 20 Mental and behavioural disorders due to use of hallucinogens residual and late-onset psychotic disorder
- 21 Mental and behavioural disorders due to use of hallucinogens other mental and behavioural disorders
- 22 Mental and behavioural disorders due to use of hallucinogens unspecified mental and behavioural disorders
- 23 Mental and behavioural disorders due to use of tobacco harmful use
- 24 Mental and behavioural disorders due to use of tobacco dependence syndrome
- 25 Mental and behavioural disorders due to use of tobacco withdrawal state
- 26 Mental and behavioural disorders due to use of tobacco withdrawal state with delirium
- 27 Mental and behavioural disorders due to use of tobacco psychotic disorder
- 28 Mental and behavioural disorders due to use of tobacco amnesic syndrome
- 29 Mental and behavioural disorders due to use of tobacco residual and late-onset psychotic disorder
- 30 Mental and behavioural disorders due to use of tobacco other mental and behavioural disorders
- 31 Mental and behavioural disorders due to use of tobacco unspecified mental and behavioural disorders
- 32 Mental and behavioural disorders due to use of volatile solvents harmful use
- 33 Mental and behavioural disorders due to use of volatile solvents dependence syndrome
- 34 Mental and behavioural disorders due to use of volatile solvents withdrawal state
- 35 Mental and behavioural disorders due to use of volatile solvents withdrawal state with delirium
- 36 Mental and behavioural disorders due to use of volatile solvents psychotic disorder
- 37 Mental and behavioural disorders due to use of volatile solvents amnesic syndrome
- 38 Mental and behavioural disorders due to use of volatile solvents residual and late-onset psychotic disorder
- 39 Mental and behavioural disorders due to use of volatile solvents other mental and behavioural disorders
- 40 Mental and behavioural disorders due to use of volatile solvents unspecified mental and behavioural disorders
- 41 Mental and behavioural disorders due to multiple drug use and use of other psychoactive substances harmful
- 42 Mental and behavioural disorders due to multiple drug use and use of other psychoactive substances depende
- 43 Mental and behavioural disorders due to multiple drug use and use of other psychoactive substances withdraw
- 44 Mental and behavioural disorders due to multiple drug use and use of other psychoactive substances psychoti
- 45 Mental and behavioural disorders due to multiple drug use and use of other psychoactive substances amnesic
- 46 Mental and behavioural disorders due to multiple drug use and use of other psychoactive substances residual
- 47 Mental and behavioural disorders due to multiple drug use and use of other psychoactive substances other m
- 48 Mental and behavioural disorders due to multiple drug use and use of other psychoactive substances unspecif
- 49 Paranoid schizophrenia
- 50 Hebephrenic schizophrenia
- 51
- 52
- 53
- 54
- 55
- 56
- 57
- 58
- 59
- 60

1 Catatonic schizophrenia  
2 Undifferentiated schizophrenia  
3 Post-schizophrenic depression  
4 Residual schizophrenia  
5 Simple schizophrenia  
6 Other schizophrenia  
7 Schizophrenia, unspecified  
8 Schizotypal disorder  
9 Delusional disorder  
10 Other persistent delusional disorders  
11 Persistent delusional disorder, unspecified  
12 Acute polymorphic psychotic disorder without symptoms of schizophrenia  
13 Acute polymorphic psychotic disorder with symptoms of schizophrenia  
14 Acute schizophrenia-like psychotic disorder  
15 Other acute predominantly delusional psychotic disorders  
16 Other acute and transient psychotic disorders  
17 Acute and transient psychotic disorder, unspecified  
18 Induced delusional disorder  
19 Schizoaffective disorder, manic type  
20 Schizoaffective disorder, depressive type  
21 Schizoaffective disorder, mixed type  
22 Other schizoaffective disorders  
23 Schizoaffective disorder, unspecified  
24 Other nonorganic psychotic disorders  
25 Unspecified nonorganic psychosis  
26 Hypomania  
27 Mania without psychotic symptoms  
28 Mania with psychotic symptoms  
29 Other manic episodes  
30 Manic episode, unspecified  
31 Bipolar affective disorder, current episode hypomanic  
32 Bipolar affective disorder, current episode manic without psychotic symptoms  
33 Bipolar affective disorder, current episode manic with psychotic symptoms  
34 Bipolar affective disorder, current episode mild or moderate depression  
35 Bipolar affective disorder, current episode severe depression without psychotic symptoms  
36 Bipolar affective disorder, current episode severe depression with psychotic symptoms  
37 Bipolar affective disorder, current episode mixed  
38 Bipolar affective disorder, currently in remission  
39 Other bipolar affective disorders  
40 Bipolar affective disorder, unspecified  
41 Severe depressive episode without psychotic symptoms  
42 Severe depressive episode with psychotic symptoms  
43 Other depressive episodes  
44 Depressive episode, unspecified  
45 Recurrent depressive disorder, current episode severe without psychotic symptoms  
46 Recurrent depressive disorder, current episode severe with psychotic symptoms  
47 Other recurrent depressive disorders  
48 Recurrent depressive disorder, unspecified  
49 Cyclothymia  
50 Dysthymia

- 1
- 2 Other persistent mood [affective] disorders
- 3 Persistent mood [affective] disorder, unspecified
- 4 Other single mood [affective] disorders
- 5 Other recurrent mood [affective] disorders
- 6 Other specified mood [affective] disorders
- 7 Unspecified mood [affective] disorder
- 8 Panic disorder [episodic paroxysmal anxiety]
- 9 Generalized anxiety disorder
- 10 Mixed anxiety and depressive disorder
- 11 Other mixed anxiety disorders
- 12 Other specified anxiety disorders
- 13 Anxiety disorder, unspecified
- 14 Predominantly obsessional thoughts or ruminations
- 15 Predominantly compulsive acts [obsessional rituals]
- 16 Mixed obsessional thoughts and acts
- 17 Other obsessive-compulsive disorders
- 18 Obsessive-compulsive disorder, unspecified
- 19 Post-traumatic stress disorder
- 20 Dissociative amnesia
- 21 Dissociative fugue
- 22 Dissociative stupor
- 23 Trance and possession disorders
- 24 Dissociative motor disorders
- 25 Dissociative convulsions
- 26 Dissociative anaesthesia and sensory loss
- 27 Mixed dissociative [conversion] disorders
- 28 Other dissociative [conversion] disorders
- 29 Dissociative [conversion] disorder, unspecified
- 30 Depersonalization-derealization syndrome
- 31 Other specified neurotic disorders
- 32 Neurotic disorder, unspecified
- 33 Anorexia nervosa
- 34 Atypical anorexia nervosa
- 35 Bulimia nervosa
- 36 Atypical bulimia nervosa
- 37 Other eating disorders
- 38 Eating disorder, unspecified
- 39 Severe mental and behavioural disorders associated with the puerperium, not elsewhere classified
- 40 Other mental and behavioural disorders associated with the puerperium, not elsewhere classified
- 41 Puerperal mental disorder, unspecified
- 42
- 43
- 44
- 45
- 46
- 47
- 48
- 49
- 50
- 51
- 52
- 53
- 54
- 55
- 56
- 57
- 58
- 59
- 60

1  
2  
3  
4  
5  
6  
7  
8  
9  
10  
11  
12  
13  
14  
15  
16  
17  
18  
19  
20  
21  
22  
23  
24  
25  
26  
27  
28  
29  
30  
31  
32  
33  
34  
35  
36  
37  
38  
39  
40  
41  
42  
43  
44  
45  
46  
47  
48  
49  
50  
51  
52  
53  
54  
55  
56  
57  
58  
59  
60

For peer review only

1  
2  
3  
4  
5  
6  
7  
8  
9  
10  
11  
12  
13  
14  
15  
16  
17  
18  
19  
20  
21  
22  
23  
24  
25  
26  
27  
28  
29  
30  
31  
32  
33  
34  
35  
36  
37  
38  
39  
40  
41  
42  
43  
44  
45  
46  
47  
48  
49  
50  
51  
52  
53  
54  
55  
56  
57  
58  
59  
60

For peer review only

r  
orders

| 1  | Medcodeid | Term                                                            |
|----|-----------|-----------------------------------------------------------------|
| 2  | 17279018  | Ovarian pregnancy                                               |
| 3  | 27701016  | Multiple pregnancy                                              |
| 4  | 58080013  | Ectopic pregnancy                                               |
| 5  | 59478019  | Intraligamentous pregnancy                                      |
| 6  | 97258010  | Unwanted pregnancy                                              |
| 7  | 101047019 | Quadruplet pregnancy                                            |
| 8  | 106809012 | Triplet pregnancy                                               |
| 9  | 108265019 | Twin pregnancy                                                  |
| 10 | 115533013 | Mural pregnancy                                                 |
| 11 | 131553011 | Cervical pregnancy                                              |
| 12 | 132037019 | Tubal pregnancy                                                 |
| 13 | 137128014 | Abdominal pregnancy                                             |
| 14 | 145245010 | Cornual pregnancy                                               |
| 15 | 258639017 | Serum pregnancy test positive                                   |
| 16 | 259782016 | Urine pregnancy test positive                                   |
| 17 | 262993014 | Pregnant, IUD failure                                           |
| 18 | 262994015 | IUD failure - pregnant                                          |
| 19 | 263013015 | Pregnant, diaphragm failure                                     |
| 20 | 263026016 | Pregnant, sheath failure                                        |
| 21 | 263100011 | Pregnant - urine test confirms                                  |
| 22 | 263101010 | Pregnant - blood test confirms                                  |
| 23 | 263102015 | Pregnant - V.E. confirms                                        |
| 24 | 263103013 | Pregnant - on history                                           |
| 25 | 263104019 | Pregnant - on abdominal palpation                               |
| 26 | 263105018 | Pregnant - planned                                              |
| 27 | 263107014 | Pregnant - unplanned - wanted                                   |
| 28 | 263108016 | Pregnant -unplanned-not wanted                                  |
| 29 | 263109012 | Unplanned pregnancy unknown if child is wanted                  |
| 30 | 263112010 | Patient pregnant NOS                                            |
| 31 | 263115012 | Antenatal care: 2nd pregnancy                                   |
| 32 | 263116013 | Antenatal care: 3rd pregnancy                                   |
| 33 | 263128017 | A/N care: precious pregnancy                                    |
| 34 | 283737019 | Referral for counselling for termination of pregnancy           |
| 35 | 284238018 | Requests pregnancy termination                                  |
| 36 | 305296013 | Tubal pregnancy NOS                                             |
| 37 | 305297016 | Other ectopic pregnancy                                         |
| 38 | 305298014 | Membranous pregnancy                                            |
| 39 | 305300014 | Mesenteric pregnancy                                            |
| 40 | 305301013 | Angular pregnancy                                               |
| 41 | 305303011 | Other ectopic pregnancy NOS                                     |
| 42 | 305304017 | Ectopic pregnancy NOS                                           |
| 43 | 305887017 | False labour at or after 37 completed weeks of gestation        |
| 44 | 305908014 | Post-term pregnancy unspecified                                 |
| 45 | 305910011 | Post-term pregnancy - not delivered                             |
| 46 | 305911010 | Post-term pregnancy NOS                                         |
| 47 | 305912015 | Prolonged pregnancy NOS                                         |
| 48 | 306209019 | Continuing pregnancy after abortion of one fetus or more        |
| 49 | 306210012 | Continuing pregnancy after intrauterine death one fetus or more |
| 50 | 306222010 | Twin pregnancy unspecified                                      |

|    |                 |                                                      |
|----|-----------------|------------------------------------------------------|
| 1  |                 |                                                      |
| 2  | 306225012       | Twin pregnancy NOS                                   |
| 3  | 306226013       | Triplet pregnancy unspecified                        |
| 4  | 306229018       | Triplet pregnancy NOS                                |
| 5  | 306230011       | Quadruplet pregnancy unspecified                     |
| 6  | 306233013       | Quadruplet pregnancy NOS                             |
| 7  | 306239012       | Other multiple pregnancy                             |
| 8  | 306240014       | Other multiple pregnancy unspecified                 |
| 9  | 306243011       | Other multiple pregnancy NOS                         |
| 10 | 306244017       | Multiple pregnancy NOS                               |
| 11 | 306245016       | Multiple pregnancy NOS, unspecified                  |
| 12 | 355557010       | Concealed pregnancy                                  |
| 13 | 457034014       | Gestation <24 weeks                                  |
| 14 | 457035010       | Gestation = 24 weeks                                 |
| 15 | 457036011       | Gestation >24 weeks                                  |
| 16 | 460449010       | Normal pregnancy                                     |
| 17 | 460452019       | [V]Pregnancy confirmed                               |
| 18 | 460453012       | [V]Pregnant state, incidental                        |
| 19 | 460456016       | [V]Unspecified pregnant state                        |
| 20 | 460458015       | [V]Pregnancy with history of infertility             |
| 21 | 460460018       | [V]Pregnancy with history of abortion                |
| 22 | 460462014       | [V]Pregnancy with other poor obstetric history       |
| 23 | 460463016       | [V]Pregnancy with other poor reproductive history    |
| 24 | 460467015       | [V]Other specified high-risk pregnancy               |
| 25 | 460468013       | High risk pregnancy                                  |
| 26 | 460988019       | [V]Illegitimate pregnancy                            |
| 27 | 460991019       | [V]Other unwanted pregnancy                          |
| 28 | 476066010       | Illegitimate pregnancy                               |
| 29 | 503558016       | Patient currently pregnant                           |
| 30 | 505420016       | Unplanned pregnancy                                  |
| 31 | 1209117011      | Antenatal ultrasound confirms ectopic pregnancy      |
| 32 | 1234104012      | Pregnancy confirmed                                  |
| 33 | 1234377011      | Fallopian tube pregnancy                             |
| 34 | 1235620010      | Post-term pregnancy                                  |
| 35 | 2478758011      | Fetal gestational age                                |
| 36 | 2549789015      | Refer to early pregnancy unit                        |
| 37 | 2649301016      | Pregnancy care                                       |
| 38 | 299100000112    | Prescription exemption form - pregnancy              |
| 39 | 202661000006110 | Prolonged pregnancy                                  |
| 40 | 217311000006117 | Post-term pregnancy                                  |
| 41 | 218741000000113 | Pregnant                                             |
| 42 | 361321000000115 | Gestational age                                      |
| 43 | 366271000000116 | Mid trimester scan                                   |
| 44 | 366931000000111 | Ultrasound monitoring of early pregnancy             |
| 45 | 372041000000113 | Over 20 weeks gestational age                        |
| 46 | 372221000000111 | 14 - 20 weeks gestational age                        |
| 47 | 372241000000116 | 9 - 13 weeks gestational age                         |
| 48 | 372261000000115 | Under 9 weeks gestational age                        |
| 49 | 372281000000112 | Finding of gestational age                           |
| 50 | 372301000000113 | Gestational age NOS                                  |
| 51 | 485621000006112 | Antenatal ultrasound confirms intrauterine pregnancy |

|    |                   |                                           |
|----|-------------------|-------------------------------------------|
| 1  |                   |                                           |
| 2  | 491591000006118   | From 9 weeks to <14 weeks gestational age |
| 3  | 574561000006119   | Combined or heterotopic pregnancy         |
| 4  | 694831000006112   | Multiple pregnancy NOS                    |
| 5  | 795581000006116   | Gestation period, 40 weeks                |
| 6  | 887911000006112   | Post-term/prolonged pregnancy             |
| 7  | 888061000006113   | Quad pregnancy                            |
| 8  | 917251000006111   | 2nd pregnancy                             |
| 9  | 917261000006113   | 3rd pregnancy                             |
| 10 | 919151000006111   | Antenatal care: 2nd pregnancy             |
| 11 | 919161000006113   | Antenatal care: 3rd pregnancy             |
| 12 | 919381000006118   | Patient currently pregnant                |
| 13 | 919391000006115   | Pregnant - urine test confirms            |
| 14 | 919401000006118   | Pregnant blood test confirms              |
| 15 | 919411000006115   | Pregnant - V.E. confirms                  |
| 16 | 919421000006111   | Pregnant - on history                     |
| 17 | 919431000006114   | Pregnant - on abdom. palpation            |
| 18 | 919441000006116   | Pregnant - planned                        |
| 19 | 919451000006119   | Pregnant - unplanned - wanted             |
| 20 | 919461000006117   | Pregnant - unplanned - not wanted         |
| 21 | 919481000006110   | Pregnant unplanned ? wanted               |
| 22 | 919491000006113   | Pregnant - ? planned                      |
| 23 | 919501000006117   | Unplanned pregnancy                       |
| 24 | 920561000006115   | Pregnancy prolonged - 41 weeks            |
| 25 | 920571000006110   | Pregnancy prolonged - 42 weeks            |
| 26 | 956371000006118   | Pregnant number of weeks                  |
| 27 | 958831000006114   | Pregnancy                                 |
| 28 | 974541000006112   | Pregnancy NOS                             |
| 29 | 1009411000006111  | Pregnant - number of weeks                |
| 30 | 1577961000006118  | Pregnant - Number Of Weeks                |
| 31 | 1709831000006118  | E6 - Form Mat B1 Issued - Pregnant        |
| 32 | 1850951000006116  | Reason for influenza vaccine - pregnant   |
| 33 | 1904691000006114  | Concealed pregnancy                       |
| 34 | 1968881000006116  | [SHHAPT] Pregnant 1-12 weeks              |
| 35 | 1968891000006118  | [SHHAPT] Pregnant 13-28 weeks             |
| 36 | 1968901000006119  | [SHHAPT] Pregnant 29 weeks - full term    |
| 37 | 23734110000006113 | Gestation less than 28 weeks              |
| 38 | 2927491000006112  | Gestation period, 8 weeks                 |
| 39 | 3009061000006114  | Combined heterotopic pregnancy            |
| 40 | 3060451000006110  | EP - Ectopic pregnancy                    |
| 41 | 3170321000006114  | Third trimester pregnancy                 |
| 42 | 3436341000006118  | First trimester pregnancy                 |
| 43 | 3465771000006113  | Second trimester pregnancy                |
| 44 | 3568761000006117  | Intrauterine pregnancy                    |
| 45 | 3851861000006114  | Accidental pregnancy                      |
| 46 | 3922811000006114  | Term pregnancy                            |
| 47 | 4081801000006118  | Surrogate pregnancy                       |
| 48 | 4397131000006111  | First pregnancy                           |
| 49 | 4397161000006119  | Second pregnancy                          |
| 50 | 4397201000006113  | Fourth pregnancy                          |
| 51 | 4624301000006110  | Planned pregnancy                         |



|    |                   |                                                                         |
|----|-------------------|-------------------------------------------------------------------------|
| 1  |                   |                                                                         |
| 2  | 4624441000006116  | Antenatal care of second pregnancy                                      |
| 3  | 4624481000006110  | Antenatal care of third pregnancy                                       |
| 4  | 4624701000006111  | Antenatal care: precious pregnancy                                      |
| 5  | 4796891000006115  | Continuing pregnancy after intrauterine death of one or more fetuses    |
| 6  | 5104641000006118  | Undiagnosed pregnancy                                                   |
| 7  | 5104681000006112  | Pregnancy with uncertain dates                                          |
| 8  | 5104691000006110  | Low risk pregnancy                                                      |
| 9  | 5104711000006113  | Viable pregnancy                                                        |
| 10 | 5104731000006119  | Biochemical pregnancy                                                   |
| 11 | 5104741000006112  | Single pregnancy                                                        |
| 12 | 5104861000006118  | Viable fetus in abdominal pregnancy                                     |
| 13 | 5104871000006113  | Viable foetus in abdominal pregnancy                                    |
| 14 | 5104881000006111  | Unruptured tubal pregnancy                                              |
| 15 | 5264811000006117  | Presentation of pregnancy                                               |
| 16 | 5264821000006113  | Reported conception - pregnancy                                         |
| 17 | 5285441000006119  | Pregnancy test positive                                                 |
| 18 | 5285451000006117  | Pregnancy test weakly positive                                          |
| 19 | 5357971000006112  | First trimester                                                         |
| 20 | 5357991000006113  | Second trimester                                                        |
| 21 | 5358011000006117  | Third trimester                                                         |
| 22 | 5359841000006119  | Pregnant woman                                                          |
| 23 | 5584191000006113  | Wanted pregnancy                                                        |
| 24 | 5592021000006116  | Secondary abdominal pregnancy                                           |
| 25 | 5650021000006115  | Uncertain viability of pregnancy                                        |
| 26 | 5753521000006113  | Pregnancy                                                               |
| 27 | 6027021000006112  | Gestation less than 24 weeks                                            |
| 28 | 6027041000006117  | Gestation period, 24 weeks                                              |
| 29 | 6027071000006113  | Gestation greater than 24 weeks                                         |
| 30 | 6043741000006114  | Early stage of pregnancy                                                |
| 31 | 7090351000006111  | Gestation less than 20 weeks                                            |
| 32 | 7100341000006115  | Third trimester pregnancy less than 36 weeks                            |
| 33 | 7107641000006114  | Gestation greater than 20 weeks                                         |
| 34 | 7221311000006119  | Intends to continue pregnancy                                           |
| 35 | 7264921000006115  | Multiple pregnancy involving intrauterine pregnancy and tubal pregnancy |
| 36 | 7395361000006118  | Dichorionic diamniotic twin pregnancy                                   |
| 37 | 7395371000006113  | Monochorionic twin pregnancy                                            |
| 38 | 7395381000006111  | Monochorionic diamniotic twin pregnancy                                 |
| 39 | 7395411000006114  | Monochorionic monoamniotic twin pregnancy                               |
| 40 | 7706121000006118  | Dizygotic twin pregnancy                                                |
| 41 | 7991731000006116  | IVF - in-vitro fertilisation pregnancy                                  |
| 42 | 8031611000006111  | Epilepsy in pregnancy                                                   |
| 43 | 8042451000006119  | High risk pregnancy due to recurrent pregnancy loss                     |
| 44 | 8294311000006118  | Ultrasound scan of multiple pregnancy                                   |
| 45 | 8295351000006116  | Pregnancy of unknown location                                           |
| 46 | 11831091000006119 | Pregnancy with gestation less than 20 weeks                             |
| 47 | 13695331000006114 | Trichorionic triamniotic triplet pregnancy                              |
| 48 | 13695341000006116 | Dichorionic triamniotic triplet pregnancy                               |
| 49 | 13718411000006111 | Ectopic pregnancy of left ovary                                         |
| 50 | 13718431000006117 | Ectopic pregnancy of right ovary                                        |
| 51 | 14068761000006116 | Pregnancy unplanned but wanted                                          |

|    |                   |                                          |
|----|-------------------|------------------------------------------|
| 1  |                   |                                          |
| 2  | 14068771000006111 | Pregnancy unplanned and unwanted         |
| 3  | 4123016           | Failed forceps delivery                  |
| 4  | 28094011          | Missed abortion                          |
| 5  | 29367011          | Spontaneous abortion                     |
| 6  | 31041018          | Elective abortion                        |
| 7  | 31406012          | Low forceps delivery                     |
| 8  | 46918011          | Twin birth                               |
| 9  | 52214011          | Self-induced abortion                    |
| 10 | 66086012          | Legally induced abortion                 |
| 11 | 80331017          | Abortive plague                          |
| 12 | 82664019          | Illegally induced abortion               |
| 13 | 82665018          | Criminal abortion                        |
| 14 | 98603019          | Inevitable abortion                      |
| 15 | 112117014         | Spontaneous abortion with sepsis         |
| 16 | 248392011         | Registrar-birth/death/marriage           |
| 17 | 263355019         | P/N care started at birth                |
| 18 | 263405014         | Birth details                            |
| 19 | 263406010         | Place of birth                           |
| 20 | 263407018         | Home birth                               |
| 21 | 263408011         | GP unit birth                            |
| 22 | 263409015         | Consultant unit birth                    |
| 23 | 263411012         | Ambulance birth                          |
| 24 | 263414016         | Finding of place of birth                |
| 25 | 263435019         | Single live birth                        |
| 26 | 263436018         | Single stillbirth                        |
| 27 | 263444018         | Finding of outcome of delivery           |
| 28 | 263445017         | Birth of child                           |
| 29 | 263488013         | Baby birth weight under 3% (under 2500g) |
| 30 | 263504010         | Birth head circumference                 |
| 31 | 263505011         | Birth HC = < 3rd centile                 |
| 32 | 263506012         | Birth HC = 3rd-9th centile               |
| 33 | 263507015         | Birth HC = 10th-24th centile             |
| 34 | 263508013         | Birth HC = 25th-49th centile             |
| 35 | 263509017         | Birth HC = 50th-74th centile             |
| 36 | 263510010         | Birth HC = 75th-89th centile             |
| 37 | 263511014         | Birth HC = 90th-96th centile             |
| 38 | 263512019         | Birth HC = > 97th centile                |
| 39 | 263513012         | Birth head circumference NOS             |
| 40 | 263514018         | Birth length                             |
| 41 | 263515017         | Birth length = < 3rd centile             |
| 42 | 263516016         | Birth length=3rd-9th centile             |
| 43 | 263517013         | Birth length=10th-24th centile           |
| 44 | 263518015         | Birth length=25th-49th centile           |
| 45 | 263519011         | Birth length=50th-74th centile           |
| 46 | 263520017         | Birth length=75th-89th centile           |
| 47 | 263521018         | Birth length=90th-96th centile           |
| 48 | 263522013         | Birth length = > 97th centile            |
| 49 | 263602019         | Normal birth                             |
| 50 | 263787019         | Child not examined at birth              |
| 51 | 263796019         | Child exam. - birth NOS                  |

|    |           |                                                        |
|----|-----------|--------------------------------------------------------|
| 1  |           |                                                        |
| 2  | 273813015 | Introduction of abortifacient into uterine cavity      |
| 3  | 273818012 | Insertion of prostaglandin abortifacient pessary       |
| 4  | 273819016 | Insertion of abortifacient pessary                     |
| 5  | 273821014 | Introduction of abortifacient into uterine cavity NOS  |
| 6  | 274286016 | Other specified elective caesarean delivery            |
| 7  | 274289011 | Elective caesarean delivery NOS                        |
| 9  | 274293017 | Upper uterine segment caesarean delivery NEC           |
| 10 | 274297016 | Other specified other caesarean delivery               |
| 11 | 274298014 | Other caesarean delivery NOS                           |
| 12 | 274302018 | Breech extraction delivery with version                |
| 13 | 274304017 | Other specified breech extraction delivery             |
| 14 | 274305016 | Breech extraction delivery NOS                         |
| 15 | 274306015 | Other breech delivery                                  |
| 16 | 274307012 | Spontaneous breech delivery                            |
| 17 | 274308019 | Assisted breech delivery                               |
| 18 | 274309010 | Other specified other breech delivery                  |
| 19 | 274310017 | Other breech delivery NOS                              |
| 20 | 274311018 | Forceps cephalic delivery                              |
| 21 | 274312013 | High forceps cephalic delivery with rotation           |
| 22 | 274313015 | High forceps cephalic delivery NEC                     |
| 23 | 274318012 | Barton forceps cephalic delivery with rotation         |
| 24 | 274319016 | Dehee forceps cephalic delivery with rotation          |
| 25 | 274321014 | Piper forceps delivery                                 |
| 26 | 274322019 | Other specified forceps cephalic delivery              |
| 27 | 274323012 | Forceps cephalic delivery NOS                          |
| 28 | 274324018 | High vacuum delivery                                   |
| 29 | 274325017 | Low vacuum delivery                                    |
| 30 | 274326016 | Vacuum delivery before full dilation of cervix         |
| 31 | 274327013 | Trial of vacuum delivery                               |
| 32 | 274328015 | Other specified vacuum delivery                        |
| 33 | 274329011 | Vacuum delivery NOS                                    |
| 34 | 274336012 | Normal delivery                                        |
| 35 | 274338013 | Water birth delivery                                   |
| 36 | 274339017 | Other specified normal delivery                        |
| 37 | 274340015 | Normal delivery procedure                              |
| 38 | 274341016 | Delivery procedure                                     |
| 39 | 274344012 | Other specified other method of delivery               |
| 40 | 274345013 | Other method of delivery NOS                           |
| 41 | 274346014 | Operation to facilitate delivery                       |
| 42 | 274349019 | Other specified other operation to facilitate delivery |
| 43 | 274350019 | Other operation to facilitate delivery NOS             |
| 44 | 274351015 | Other specified induction or delivery operations       |
| 45 | 274352010 | Induction and delivery operations NOS                  |
| 46 | 274358014 | Manual removal of placenta from delivered uterus       |
| 47 | 274361010 | Other operations on delivered uterus                   |
| 48 | 274366017 | Instrumental exploration of delivered uterus NEC       |
| 49 | 274367014 | Manual exploration of delivered uterus NEC             |
| 50 | 274368016 | Normal delivery of placenta                            |
| 51 | 274377011 | Other specified other operation on delivered uterus    |
| 52 | 274378018 | Other operation on delivered uterus NOS                |

|    |           |                                                              |
|----|-----------|--------------------------------------------------------------|
| 1  |           |                                                              |
| 2  | 283814015 | Discharged from hospital within 6 hours of delivery          |
| 3  | 305290019 | Delivery of viable fetus in abdominal pregnancy              |
| 4  | 305295012 | Tubal abortion                                               |
| 5  | 305305016 | Spontaneous abortion unspecified                             |
| 6  | 305317019 | Unspecified spontaneous abortion with shock                  |
| 7  | 305323012 | Unspecified spontaneous abortion NOS                         |
| 8  | 305328015 | Incomplete spontaneous abortion with renal failure           |
| 9  | 305329011 | Incomplete spontaneous abortion with metabolic disorder      |
| 10 | 305330018 | Incomplete spontaneous abortion with shock                   |
| 11 | 305331019 | Incomplete spontaneous abortion with embolism                |
| 12 | 305333016 | Incomplete spontaneous abortion with complication NOS        |
| 13 | 305334018 | Complete spontaneous abortion with renal failure             |
| 14 | 305344012 | Complete spontaneous abortion with metabolic disorder        |
| 15 | 305345013 | Complete spontaneous abortion with shock                     |
| 16 | 305347017 | Complete spontaneous abortion with embolism                  |
| 17 | 305349019 | Complete spontaneous abortion with complication NOS          |
| 18 | 305351015 | Complete spontaneous abortion NOS                            |
| 19 | 305376019 | Spontaneous abortion NOS                                     |
| 20 | 305382016 | Legal abortion unspecified                                   |
| 21 | 305393019 | Unspecified legal abortion with complication NOS             |
| 22 | 305395014 | Unspecified legal abortion NOS                               |
| 23 | 305407013 | Incomplete legal abortion with renal failure                 |
| 24 | 305408015 | Incomplete legal abortion with metabolic disorder            |
| 25 | 305409011 | Incomplete legal abortion with shock                         |
| 26 | 305410018 | Incomplete legal abortion with embolism                      |
| 27 | 305411019 | Incomplete legal abortion with other specified complication  |
| 28 | 305414010 | Incomplete legal abortion with complication NOS              |
| 29 | 305416012 | Incomplete legal abortion NOS                                |
| 30 | 305428016 | Complete legal abortion with renal failure                   |
| 31 | 305429012 | Complete legal abortion with metabolic disorder              |
| 32 | 305430019 | Complete legal abortion with shock                           |
| 33 | 305431015 | Complete legal abortion with embolism                        |
| 34 | 305432010 | Complete legal abortion with other specified complication    |
| 35 | 305433017 | Complete legal abortion with complication NOS                |
| 36 | 305435012 | Complete legal abortion NOS                                  |
| 37 | 305442012 | Illegal abortion unspecified                                 |
| 38 | 305447018 | Unspecified illegal abortion with renal failure              |
| 39 | 305448011 | Unspecified illegal abortion with metabolic disorder         |
| 40 | 305449015 | Unspecified illegal abortion with shock                      |
| 41 | 305450015 | Unspecified illegal abortion with embolism                   |
| 42 | 305452011 | Unspecified illegal abortion with complication NOS           |
| 43 | 305453018 | Unspecified illegal abortion with no mention of complication |
| 44 | 305454012 | Unspecified illegal abortion NOS                             |
| 45 | 305455013 | Illegal abortion incomplete                                  |
| 46 | 305460012 | Incomplete illegal abortion with renal failure               |
| 47 | 305461011 | Incomplete illegal abortion with metabolic disorder          |
| 48 | 305462016 | Incomplete illegal abortion with shock                       |
| 49 | 305463014 | Incomplete illegal abortion with embolism                    |
| 50 | 305465019 | Incomplete illegal abortion with complication NOS            |
| 51 | 305467010 | Incomplete illegal abortion NOS                              |

|    |           |                                                               |
|----|-----------|---------------------------------------------------------------|
| 1  |           |                                                               |
| 2  | 305468017 | Illegal abortion complete                                     |
| 3  | 305473011 | Complete illegal abortion with renal failure                  |
| 4  | 305474017 | Complete illegal abortion with metabolic disorder             |
| 5  | 305475016 | Complete illegal abortion with shock                          |
| 6  | 305476015 | Complete illegal abortion with embolism                       |
| 8  | 305477012 | Complete illegal abortion with other specified complication   |
| 9  | 305481012 | Complete illegal abortion with complication NOS               |
| 10 | 305483010 | Complete illegal abortion NOS                                 |
| 11 | 305484016 | Illegally induced abortion NOS                                |
| 12 | 305485015 | Unspecified abortion                                          |
| 14 | 305487011 | Unspecified abortion with genital tract or pelvic infection   |
| 15 | 305488018 | Unspecified abortion with delayed or excessive haemorrhage    |
| 16 | 305491018 | Unspecified abortion with renal failure                       |
| 17 | 305496011 | Unspecified abortion with complication NOS                    |
| 18 | 305497019 | Unspecified abortion with no mention of complication          |
| 20 | 305498012 | Unspecified abortion NOS                                      |
| 21 | 305499016 | Unspecified abortion incomplete                               |
| 22 | 305511017 | Unspecified incomplete abortion NOS                           |
| 23 | 305512012 | Unspecified abortion complete                                 |
| 24 | 305522018 | Unspecified complete abortion with complication NOS           |
| 26 | 305524017 | Unspecified complete abortion NOS                             |
| 27 | 305613010 | Other specified pregnancy with abortive outcome               |
| 28 | 305614016 | Pregnancy with abortive outcome NOS                           |
| 29 | 306209019 | Continuing pregnancy after abortion of one fetus or more      |
| 30 | 306220019 | Normal delivery but antenatal or postnatal conditions present |
| 32 | 306221015 | Normal delivery in completely normal case NOS                 |
| 33 | 306223017 | Twin pregnancy - delivered                                    |
| 34 | 306227016 | Triplet pregnancy - delivered                                 |
| 35 | 306231010 | Quadruplet pregnancy - delivered                              |
| 36 | 306235018 | Multiple delivery, all spontaneous                            |
| 38 | 306236017 | Multiple delivery, all by forceps and vacuum extractor        |
| 39 | 306237014 | Multiple delivery, all by caesarean section                   |
| 40 | 306241013 | Other multiple pregnancy - delivered                          |
| 41 | 306246015 | Multiple pregnancy NOS - delivered                            |
| 43 | 306711012 | Intrauterine death - delivered                                |
| 44 | 307569010 | Forceps delivery unspecified                                  |
| 45 | 307570011 | Forceps delivery - delivered                                  |
| 46 | 307577014 | Delivery by combination of forceps and vacuum extractor       |
| 47 | 307579012 | Forceps delivery NOS                                          |
| 48 | 307583012 | Vacuum extractor delivery unspecified                         |
| 50 | 307584018 | Vacuum extractor delivery - delivered                         |
| 51 | 307585017 | Vacuum extractor delivery NOS                                 |
| 52 | 307590019 | Breech extraction - delivered                                 |
| 53 | 307595012 | Caesarean delivery unspecified                                |
| 55 | 307596013 | Caesarean delivery - delivered                                |
| 56 | 307600015 | Delivery by elective caesarean section                        |
| 57 | 307603018 | Delivery by emergency caesarean section                       |
| 58 | 307604012 | Delivery by caesarean hysterectomy                            |
| 59 | 307608010 | Caesarean delivery NOS                                        |
| 60 | 308082011 | [X]Other abortion                                             |

|    |           |                                                                       |
|----|-----------|-----------------------------------------------------------------------|
| 1  |           |                                                                       |
| 2  | 308177019 | [X]Other single spontaneous delivery                                  |
| 3  | 308178012 | [X]Other and unspecified forceps delivery                             |
| 4  | 308179016 | [X]Other single delivery by caesarean section                         |
| 5  | 308181019 | [X]Other assisted breech delivery                                     |
| 6  | 308182014 | [X]Other manipulation-assisted delivery                               |
| 7  | 308183016 | [X]Other specified assisted single delivery                           |
| 8  | 308185011 | [X]Other multiple delivery                                            |
| 9  | 308186012 | [X]Assisted single delivery, unspecified                              |
| 10 | 308187015 | Multiple birth delivery                                               |
| 11 | 355670013 | Breech delivery                                                       |
| 12 | 355677011 | Vaginal delivery following previous caesarean section                 |
| 13 | 359964011 | Stillbirth NEC                                                        |
| 14 | 398326018 | Incomplete spontaneous abortion NOS                                   |
| 15 | 398334012 | Readmission for retained products of conception, spontaneous abortion |
| 16 | 401475014 | Outcome of delivery                                                   |
| 17 | 401481018 | Finding of birth details                                              |
| 18 | 411106013 | Simpson's forceps delivery                                            |
| 19 | 411401013 | Spontaneous abortion with heavy bleeding                              |
| 20 | 411405016 | Retained products after spontaneous abortion                          |
| 21 | 418952011 | Livebirth                                                             |
| 22 | 418953018 | Stillbirth [prevention record]                                        |
| 23 | 418954012 | Triplet birth                                                         |
| 24 | 418956014 | Delivery - sex of baby                                                |
| 25 | 420192012 | Premature delivery                                                    |
| 26 | 444045013 | Forceps delivery                                                      |
| 27 | 451085010 | Inevitable abortion complete                                          |
| 28 | 451094016 | Inevitable abortion incomplete                                        |
| 29 | 451097011 | Complete inevitable abortion without complication                     |
| 30 | 451099014 | Unspecified inevitable abortion complicated by embolism               |
| 31 | 451103016 | Inevitable abortion unspecified                                       |
| 32 | 451105011 | Incomplete inevitable abortion with unspecified complication          |
| 33 | 451106012 | Incomplete inevitable abortion complicated by embolism                |
| 34 | 451109017 | Incomplete inevitable abortion without complication                   |
| 35 | 451113012 | Complete inevitable abortion complicated by embolism                  |
| 36 | 451115017 | Unspecified inevitable abortion without complication                  |
| 37 | 451120017 | Complete inevitable abortion with unspecified complication            |
| 38 | 452906013 | Spontaneous vertex delivery                                           |
| 39 | 453239011 | Fresh stillbirth                                                      |
| 40 | 453240013 | Macerated stillbirth                                                  |
| 41 | 460135012 | Domino delivery                                                       |
| 42 | 460528011 | [V]Outcome of delivery                                                |
| 43 | 460529015 | [V]Single live birth                                                  |
| 44 | 460530013 | [V]Single stillbirth                                                  |
| 45 | 460534016 | Multiple birth                                                        |
| 46 | 460535015 | [V]Other multiple birth, some live born                               |
| 47 | 460536019 | [V]Other multiple birth, all stillborn                                |
| 48 | 460537011 | [V]Other specified outcome of delivery                                |
| 49 | 460538018 | [V]Unspecified delivery outcome                                       |
| 50 | 460559013 | [V]Healthy liveborn infants according to type of birth                |
| 51 | 460560015 | Singleton liveborn unspecified as to place of birth                   |



|    |                 |                                                                     |
|----|-----------------|---------------------------------------------------------------------|
| 1  |                 |                                                                     |
| 2  | 460584011       | [V]Other multiple birth, mates live born                            |
| 3  | 460585012       | [V]Other multiple birth, born in hospital, mates live born          |
| 4  | 460589018       | [V]Other multiple birth, mates live born, NOS                       |
| 5  | 460590010       | [V]Other multiple birth, mates stillborn                            |
| 6  |                 |                                                                     |
| 7  | 460591014       | [V]Other multiple birth, born in hospital, mates stillborn          |
| 8  | 460595017       | [V]Other multiple birth, mates stillborn, NOS                       |
| 9  | 460596016       | [V]Other multiple birth, mates live and stillborn                   |
| 10 | 460606015       | [V]Other multiple birth, mates live and stillborn NOS               |
| 11 | 460607012       | [V]Other multiple birth, unspecified                                |
| 12 |                 |                                                                     |
| 13 | 460608019       | [V]Other multiple birth, unspecified, born in hospital              |
| 14 | 460612013       | [V]Other multiple birth, unspecified, NOS                           |
| 15 | 460613015       | [V]Unspecified birth                                                |
| 16 | 460615010       | [V]Unspecified birth, born before admission to hospital             |
| 17 | 461396011       | [X]Other multiple births, all liveborn                              |
| 18 |                 |                                                                     |
| 19 | 461397019       | [X]Other multiple births, some liveborn                             |
| 20 | 461398012       | [X]Other multiple births, all stillborn                             |
| 21 | 461401010       | [X]Oth multip liveborn infants, unspec as to place of birth         |
| 22 | 492067012       | Legally induced abortion - TOP                                      |
| 23 | 497301012       | Manually assisted vaginal delivery                                  |
| 24 |                 |                                                                     |
| 25 | 499316017       | Mid-cavity forceps delivery                                         |
| 26 | 501543018       | Pregnancy with abortive outcome                                     |
| 27 | 1227644019      | [V]Stillbirth                                                       |
| 28 | 1227645018      | [V]Live birth                                                       |
| 29 | 1227646017      | [V]Birth - type                                                     |
| 30 |                 |                                                                     |
| 31 | 1489338013      | Born by forceps delivery                                            |
| 32 | 1489339017      | Born by normal vaginal delivery                                     |
| 33 | 1491663016      | Therapeutic abortion                                                |
| 34 | 1493826016      | Curettage of delivered uterus                                       |
| 35 | 2154381019      | Elective caesarean delivery                                         |
| 36 |                 |                                                                     |
| 37 | 2159214016      | Born by breech delivery                                             |
| 38 | 2159215015      | Born by ventouse delivery                                           |
| 39 | 2477192015      | Indeterminate stillbirth                                            |
| 40 | 2579233015      | Scanzoni forceps cephalic delivery with rotation                    |
| 41 | 2794110017      | Stillbirth - unknown if foetal death intrapartum or prior to labour |
| 42 |                 |                                                                     |
| 43 | 3503056015      | Delivery by mid-vacuum extraction                                   |
| 44 | 66941000006112  | Delivery by vacuum extraction                                       |
| 45 | 71831000006112  | Vacuum delivery                                                     |
| 46 | 81651000006111  | Unspecified abortion                                                |
| 47 |                 |                                                                     |
| 48 | 81691000006117  | Unspecified abortion NOS                                            |
| 49 | 87191000006118  | Trial forceps delivery                                              |
| 50 | 117121000006114 | Surgical abortion - complete                                        |
| 51 | 117131000006112 | Surgical abortion - incomplete                                      |
| 52 | 130121000006117 | Spontaneous breech delivery                                         |
| 53 |                 |                                                                     |
| 54 | 130131000006119 | Spontaneous breech delivery                                         |
| 55 | 130231000006113 | Spontaneous vaginal delivery                                        |
| 56 | 220881000000115 | Deliveries by vacuum extractor                                      |
| 57 | 220891000000118 | Ventouse delivery                                                   |
| 58 | 224131000000116 | Childbirth operations                                               |
| 59 | 296261000006113 | Nursing home birth                                                  |
| 60 | 297841000006111 | Delivery normal                                                     |

|    |                  |                                                                  |
|----|------------------|------------------------------------------------------------------|
| 1  |                  |                                                                  |
| 2  | 349951000006113  | [V]Unspecified birth NOS                                         |
| 3  | 349961000006110  | [V]Unspecified birth, born outside hospital and not hospitalised |
| 4  | 359181000006117  | Stillbirth                                                       |
| 5  | 423241000006112  | [X]Pregnancy with abortive outcome                               |
| 6  | 495951000006112  | Assisted breech delivery                                         |
| 7  | 532021000006113  | Caesarean delivery                                               |
| 8  | 637851000006117  | Elective upper uterine segment caesarean delivery                |
| 9  | 675211000006111  | Neville-Barnes forceps delivery                                  |
| 10 | 695721000006115  | Multiple delivery                                                |
| 11 | 703361000006115  | Mid forceps cephalic delivery NEC                                |
| 12 | 703371000006110  | Mid forceps cephalic delivery with rotation                      |
| 13 | 712611000006115  | Medical abortion - complete                                      |
| 14 | 712771000006119  | Medical cert. of still-birth                                     |
| 15 | 713211000006112  | Medical abortion - incomplete                                    |
| 16 | 717731000006115  | Manual removal products of conception delivered uterus NOS       |
| 17 | 717741000006113  | Manual removal products of conception delivered uterus OS        |
| 18 | 717751000006110  | Manual removal of products of conception from delivered uterus   |
| 19 | 733921000006119  | Low forceps cephalic delivery                                    |
| 20 | 748251000006111  | Complete legal abortion                                          |
| 21 | 748271000006118  | Legal abortion incomplete                                        |
| 22 | 754081000006118  | Kielland forceps cephalic delivery with rotation                 |
| 23 | 755061000006112  | Kielland forceps delivery with rotation                          |
| 24 | 853181000006117  | Live birth                                                       |
| 25 | 871251000006115  | Other forceps delivery op.                                       |
| 26 | 871401000006118  | Breech delivery op.                                              |
| 27 | 871441000006116  | High forceps delivery op.                                        |
| 28 | 871461000006117  | Mid forceps delivery op.                                         |
| 29 | 871471000006112  | Low forceps delivery op.                                         |
| 30 | 871571000006111  | Supervision - normal delivery                                    |
| 31 | 887671000006110  | Induced abortion                                                 |
| 32 | 887681000006113  | Abortion NOS                                                     |
| 33 | 887771000006117  | Abortive pregnancy NOS                                           |
| 34 | 887781000006119  | Other abortive pregnancy                                         |
| 35 | 888051000006111  | Normal delivery - occipitoant.                                   |
| 36 | 888601000006115  | High forceps delivery                                            |
| 37 | 888651000006116  | Method of delivery NOS                                           |
| 38 | 893901000006118  | Born by breech delivery                                          |
| 39 | 893911000006115  | Born by forceps delivery                                         |
| 40 | 893931000006114  | Born by caesarean delivery                                       |
| 41 | 906891000006115  | [RFC] Labour and delivery                                        |
| 42 | 988331000006111  | Other forceps delivery op.                                       |
| 43 | 991561000006119  | Abortive pregnancy NOS                                           |
| 44 | 991781000006117  | Breech delivery                                                  |
| 45 | 1884381000006112 | Time of delivery                                                 |
| 46 | 1898141000006112 | Antepartum stillbirth                                            |
| 47 | 1898151000006114 | Intrapartum stillbirth                                           |
| 48 | 2365201000000116 | Antepartum stillbirth                                            |
| 49 | 2365241000000118 | Intrapartum stillbirth                                           |
| 50 | 2527321000006111 | Forceps delivery failed                                          |
| 51 | 2527331000006114 | Failed forceps delivery                                          |



|    |                  |                                                          |
|----|------------------|----------------------------------------------------------|
| 1  |                  |                                                          |
| 2  | 2562021000006116 | Birth                                                    |
| 3  | 2588081000006117 | Assisted spontaneous delivery                            |
| 4  | 2649031000006112 | Term birth of newborn female                             |
| 5  | 2783301000006116 | Low forceps delivery with episiotomy                     |
| 6  |                  |                                                          |
| 7  | 2793541000006110 | Surgical treatment of missed abortion of first trimester |
| 8  | 2835891000006111 | Term birth of newborn male                               |
| 9  | 2879641000006116 | Spontaneous abortion without complication                |
| 10 | 2913301000006114 | Mid forceps delivery with episiotomy                     |
| 11 | 2921211000006110 | Delivery by vacuum extraction with episiotomy            |
| 12 |                  |                                                          |
| 13 | 3134071000006118 | Legal abortion                                           |
| 14 | 3289421000006118 | FTND - Full term normal delivery                         |
| 15 | 3289431000006115 | SVD - Spontaneous vaginal delivery                       |
| 16 | 3289441000006113 | Normal delivery                                          |
| 17 | 3303281000006110 | Illegal abortion                                         |
| 18 |                  |                                                          |
| 19 | 3322041000006114 | Term birth of newborn twins                              |
| 20 | 3439141000006111 | Induced abortion                                         |
| 21 | 3464721000006113 | Premature birth of newborn female                        |
| 22 | 3516291000006115 | Mid forceps delivery                                     |
| 23 | 3657551000006113 | Forceps delivery with rotation of fetal head             |
| 24 | 3766101000006117 | Stillbirth of premature male (1000-2499 gms.)            |
| 25 | 3952341000006118 | Delivery by Kielland rotation                            |
| 26 | 3952361000006119 | KRFD - Kielland's rotational forceps delivery            |
| 27 | 3952371000006114 | Kielland's rotational forceps delivery                   |
| 28 |                  |                                                          |
| 29 | 3960501000006117 | High forceps delivery                                    |
| 30 | 4081901000006112 | Post-term delivery                                       |
| 31 | 4515081000006117 | Incomplete spontaneous abortion                          |
| 32 | 4676701000006117 | Elective cesarean delivery                               |
| 33 | 4676811000006111 | Midforceps cephalic delivery with rotation               |
| 34 | 4676971000006113 | ND - Normal delivery                                     |
| 35 | 4801431000006110 | Delivered by mid-cavity forceps with rotation            |
| 36 | 4801461000006118 | Deliveries by caesarean                                  |
| 37 | 4801481000006111 | Cesarean delivery                                        |
| 38 | 4801551000006119 | Delivery by elective cesarean section                    |
| 39 | 4801571000006112 | Delivery by emergency cesarean section                   |
| 40 | 5101421000006113 | Instrumental delivery                                    |
| 41 | 5101431000006111 | Nonrotational forceps delivery                           |
| 42 | 5101441000006118 | Outlet forceps delivery                                  |
| 43 | 5101831000006113 | Placental delivery procedure                             |
| 44 | 5105591000006112 | Complete breech delivery                                 |
| 45 | 5105621000006114 | Multiple delivery                                        |
| 46 | 5105651000006117 | VBAC - Vaginal birth after caesarean section             |
| 47 | 5106241000006114 | SB - Stillbirth                                          |
| 48 | 5523911000006110 | Delivered by low forceps delivery                        |
| 49 | 5523921000006119 | Delivered by mid-cavity forceps delivery                 |
| 50 | 5523931000006116 | Deliveries by breech extraction                          |
| 51 | 5701001000006116 | Medical abortion                                         |
| 52 | 5728741000006115 | Breech/instrumental delivery operations                  |
| 53 | 5730571000006118 | Normal delivery - occipitoanterior                       |
| 54 | 5731041000006113 | Born after precipitate delivery                          |
| 55 | 5744011000006110 | Mother delivered                                         |
| 56 |                  |                                                          |
| 57 |                  |                                                          |
| 58 |                  |                                                          |
| 59 |                  |                                                          |
| 60 |                  |                                                          |

1  
2 5744051000006111 Vaginal delivery  
3 5904701000006113 Delivered by caesarean section - pregnancy at term  
4 5904711000006111 Delivered by cesarean section - pregnancy at term  
5 5904721000006115 Delivered by caesarean delivery following previous caesarean delivery  
6 5904741000006110 Delivered by caesarean deliv following previous caesarean delivery  
7  
8 5906231000006119 FD - Forceps delivery  
9 6427811000006115 Delivery of cephalic presentation  
10 6451791000006110 Childbirth  
11 6451801000006111 Pregnancy delivered  
12 6451811000006114 Delivery  
13 6458691000006114 Abortion  
14  
15 6557371000006112 Born by normal vagin delivery  
16 6767831000006112 Unplanned home birth  
17 7128031000006119 Failed instrumental delivery  
18 7511801000006114 Preterm spontaneous labor with preterm delivery  
19 7511821000006116 Preterm spontaneous labor with term delivery  
20 7693521000006111 Delivery by caesarean section for footling breech presentation  
21 7693541000006116 Delivery by caesarean section for breech presentation  
22 8004341000006112 Single liveborn born in hospital by vaginal delivery  
23 9326461000006110 Vacuum assisted vaginal delivery  
24 9326571000006110 Preterm labour with preterm delivery  
25 9326581000006110 Preterm labor with preterm delivery  
26 12703861000006100 Manually assisted spontaneous delivery  
27 12716231000006100 Abortion  
28  
29  
30  
31  
32  
33  
34  
35  
36  
37  
38  
39  
40  
41  
42  
43  
44  
45  
46  
47  
48  
49  
50  
51  
52  
53  
54  
55  
56  
57  
58  
59  
60

|    |             |
|----|-------------|
| 1  |             |
| 2  | ICD-10 code |
| 3  | O00         |
| 4  | O00.0       |
| 5  | O00.1       |
| 6  | O00.2       |
| 7  | O00.8       |
| 8  | O00.9       |
| 9  | O01         |
| 10 | O02         |
| 11 | O03         |
| 12 | O04         |
| 13 | O05         |
| 14 | O06         |
| 15 | O08         |
| 16 | O03.0       |
| 17 | O03.1       |
| 18 | O03.2       |
| 19 | O03.3       |
| 20 | O03.4       |
| 21 | O03.5       |
| 22 | O03.6       |
| 23 | O03.7       |
| 24 | O03.8       |
| 25 | O03.9       |
| 26 | O04.0       |
| 27 | O04.1       |
| 28 | O04.2       |
| 29 | O04.3       |
| 30 | O04.4       |
| 31 | O04.5       |
| 32 | O04.6       |
| 33 | O04.7       |
| 34 | O04.8       |
| 35 | O04.9       |
| 36 | O05.0       |
| 37 | O05.1       |
| 38 | O05.2       |
| 39 | O05.3       |
| 40 | O05.4       |
| 41 | O05.5       |
| 42 | O05.6       |
| 43 | O05.7       |
| 44 | O05.8       |
| 45 | O05.9       |
| 46 | O06.0       |
| 47 | O06.1       |
| 48 | O06.2       |
| 49 | O06.3       |
| 50 | O06.4       |
| 51 | O06.5       |

For peer review only

1  
2 O06.6  
3 O06.7  
4 O06.8  
5 O06.9  
6 O80.0  
7 O80.1  
8 O80.8  
9 O80.9  
10 O80.9  
11 O82.0  
12 O82.1  
13 O82.2  
14 O82.2  
15 O82.8  
16 O82.9  
17 O81.0  
18 O81.1  
19 O81.2  
20 O81.2  
21 O81.3  
22 O81.4  
23 O81.5  
24 O83.0  
25 O83.1  
26 O83.1  
27 O83.2  
28 O83.3  
29 O83.3  
30 O83.4  
31 O83.8  
32 O83.9  
33 O84.0  
34 O84.1  
35 O84.2  
36 O84.2  
37 O84.8  
38 O84.9  
39  
40  
41  
42  
43  
44  
45  
46  
47  
48  
49  
50  
51  
52  
53  
54  
55  
56  
57  
58  
59  
60

For peer review only

|    |                                                                                                   |
|----|---------------------------------------------------------------------------------------------------|
| 1  |                                                                                                   |
| 2  | Term                                                                                              |
| 3  | Ectopic pregnancy                                                                                 |
| 4  | Abdominal pregnancy                                                                               |
| 5  | Tubal pregnancy                                                                                   |
| 6  | Ovarian pregnancy                                                                                 |
| 7  | Other ectopic pregnancy                                                                           |
| 8  | Ectopic pregnancy, unspecified                                                                    |
| 9  | Hydatidiform mole                                                                                 |
| 10 | Other abnormal products of conception                                                             |
| 11 | Spontaneous abortion                                                                              |
| 12 | Medical abortion                                                                                  |
| 13 | Other abortion                                                                                    |
| 14 | Unspecified abortion                                                                              |
| 15 | Complications following abortion and ectopic and molar pregnancy                                  |
| 16 | Spontaneous abortion : incomplete, complicated by genital tract and pelvic infection              |
| 17 | Spontaneous abortion : incomplete, complicated by delayed or excessive haemorrhage                |
| 18 | Spontaneous abortion : incomplete, complicated by embolism                                        |
| 19 | Spontaneous abortion : incomplete, with other and unspecified complications                       |
| 20 | Spontaneous abortion : incomplete, without complication                                           |
| 21 | Spontaneous abortion : complete or unspecified, complicated by genital tract and pelvic infection |
| 22 | Spontaneous abortion : complete or unspecified, complicated by delayed or excessive haemorrhage   |
| 23 | Spontaneous abortion : complete or unspecified, complicated by embolism                           |
| 24 | Spontaneous abortion : complete or unspecified, with other and unspecified complications          |
| 25 | Spontaneous abortion : complete or unspecified, without complication                              |
| 26 | Medical abortion : incomplete, complicated by genital tract and pelvic infection                  |
| 27 | Medical abortion : incomplete, complicated by delayed or excessive haemorrhage                    |
| 28 | Medical abortion : incomplete, complicated by embolism                                            |
| 29 | Medical abortion : incomplete, with other and unspecified complications                           |
| 30 | Medical abortion : incomplete, without complication                                               |
| 31 | Medical abortion : complete or unspecified, complicated by genital tract and pelvic infection     |
| 32 | Medical abortion : complete or unspecified, complicated by delayed or excessive haemorrhage       |
| 33 | Medical abortion : complete or unspecified, complicated by embolism                               |
| 34 | Medical abortion : complete or unspecified, with other and unspecified complications              |
| 35 | Medical abortion : complete or unspecified, without complication                                  |
| 36 | Other abortion : incomplete, complicated by genital tract and pelvic infection                    |
| 37 | Other abortion : incomplete, complicated by delayed or excessive haemorrhage                      |
| 38 | Other abortion : incomplete, complicated by embolism                                              |
| 39 | Other abortion : incomplete, with other and unspecified complications                             |
| 40 | Other abortion : incomplete, without complication                                                 |
| 41 | Other abortion : complete or unspecified, complicated by genital tract and pelvic infection       |
| 42 | Other abortion : complete or unspecified, complicated by delayed or excessive haemorrhage         |
| 43 | Other abortion : complete or unspecified, complicated by embolism                                 |
| 44 | Other abortion : complete or unspecified, with other and unspecified complications                |
| 45 | Other abortion : complete or unspecified, without complication                                    |
| 46 | Unspecified abortion : incomplete, complicated by genital tract and pelvic infection              |
| 47 | Unspecified abortion : incomplete, complicated by delayed or excessive haemorrhage                |
| 48 | Unspecified abortion : incomplete, complicated by embolism                                        |
| 49 | Unspecified abortion : incomplete, with other and unspecified complications                       |
| 50 | Unspecified abortion : incomplete, without complication                                           |
| 51 | Unspecified abortion : complete or unspecified, complicated by genital tract and pelvic infection |
| 52 | Unspecified abortion : complete or unspecified, complicated by delayed or excessive haemorrhage   |
| 53 | Unspecified abortion : complete or unspecified, complicated by embolism                           |
| 54 | Unspecified abortion : complete or unspecified, with other and unspecified complications          |
| 55 | Unspecified abortion : complete or unspecified, without complication                              |
| 56 | Unspecified abortion : complete or unspecified, complicated by genital tract and pelvic infection |
| 57 | Unspecified abortion : complete or unspecified, complicated by delayed or excessive haemorrhage   |
| 58 | Unspecified abortion : complete or unspecified, complicated by embolism                           |
| 59 | Unspecified abortion : complete or unspecified, with other and unspecified complications          |
| 60 | Unspecified abortion : complete or unspecified, without complication                              |

1 Unspecified abortion : complete or unspecified, complicated by delayed or excessive haemorrhage  
2 Unspecified abortion : complete or unspecified, complicated by embolism  
3 Unspecified abortion : complete or unspecified, with other and unspecified complications  
4 Unspecified abortion : complete or unspecified, without complication  
5 Spontaneous vertex delivery  
6 Spontaneous breech delivery  
7 Other single spontaneous delivery  
8 Single spontaneous delivery, unspecified  
9 Delivery by elective caesarean section  
10 Delivery by emergency caesarean section  
11 Delivery by caesarean hysterectomy  
12 Other single delivery by caesarean section  
13 Delivery by caesarean section, unspecified  
14 Low forceps delivery  
15 Mid-cavity forceps delivery  
16 Mid-cavity forceps with rotation  
17 Other and unspecified forceps delivery  
18 Vacuum extractor delivery  
19 Delivery by combination of forceps and vacuum extractor  
20 Breech extraction  
21 Other assisted breech delivery  
22 Other manipulation-assisted delivery  
23 Delivery of viable fetus in abdominal pregnancy  
24 Destructive operation for delivery  
25 Other specified assisted single delivery  
26 Assisted single delivery, unspecified  
27 Multiple delivery, all spontaneous  
28 Multiple delivery, all by forceps and vacuum extractor  
29 Multiple delivery, all by caesarean section  
30 Other multiple delivery  
31 Multiple delivery  
32  
33  
34  
35  
36  
37  
38  
39  
40  
41  
42  
43  
44  
45  
46  
47  
48  
49  
50  
51  
52  
53  
54  
55  
56  
57  
58  
59  
60

STROBE Statement—Checklist of items that should be included in reports of *cohort studies*

Andersen et al (2023): Persons Diagnosed with COVID in England in the Clinical Practice Research Datalink (CPRD): A Cohort Description

|                              | Item No | Recommendation                                                                                                                                                                                    | Page No  |
|------------------------------|---------|---------------------------------------------------------------------------------------------------------------------------------------------------------------------------------------------------|----------|
| <b>Title and abstract</b>    | 1       | (a) Indicate the study's design with a commonly used term in the title or the abstract                                                                                                            | 1        |
|                              |         | (b) Provide in the abstract an informative and balanced summary of what was done and what was found                                                                                               | 2-3      |
| <b>Introduction</b>          |         |                                                                                                                                                                                                   |          |
| Background/rationale         | 2       | Explain the scientific background and rationale for the investigation being reported                                                                                                              | 4        |
| Objectives                   | 3       | State specific objectives, including any prespecified hypotheses                                                                                                                                  | 4        |
| <b>Methods</b>               |         |                                                                                                                                                                                                   |          |
| Study design                 | 4       | Present key elements of study design early in the paper                                                                                                                                           | 5        |
| Setting                      | 5       | Describe the setting, locations, and relevant dates, including periods of recruitment, exposure, follow-up, and data collection                                                                   | 5        |
| Participants                 | 6       | (a) Give the eligibility criteria, and the sources and methods of selection of participants. Describe methods of follow-up                                                                        | 5        |
|                              |         | (b) For matched studies, give matching criteria and number of exposed and unexposed                                                                                                               | N/A      |
| Variables                    | 7       | Clearly define all outcomes, exposures, predictors, potential confounders, and effect modifiers. Give diagnostic criteria, if applicable                                                          | 6-9      |
| Data sources/<br>measurement | 8*      | For each variable of interest, give sources of data and details of methods of assessment (measurement). Describe comparability of assessment methods if there is more than one group              | 6-9      |
| Bias                         | 9       | Describe any efforts to address potential sources of bias                                                                                                                                         | 6-9      |
| Study size                   | 10      | Explain how the study size was arrived at                                                                                                                                                         | 5        |
| Quantitative variables       | 11      | Explain how quantitative variables were handled in the analyses. If applicable, describe which groupings were chosen and why                                                                      | 9        |
| Statistical methods          | 12      | (a) Describe all statistical methods, including those used to control for confounding                                                                                                             | 9        |
|                              |         | (b) Describe any methods used to examine subgroups and interactions                                                                                                                               | 9        |
|                              |         | (c) Explain how missing data were addressed                                                                                                                                                       | 7, 9     |
|                              |         | (d) If applicable, explain how loss to follow-up was addressed                                                                                                                                    | N/A      |
|                              |         | (e) Describe any sensitivity analyses                                                                                                                                                             | N/A      |
| <b>Results</b>               |         |                                                                                                                                                                                                   |          |
| Participants                 | 13*     | (a) Report numbers of individuals at each stage of study—eg numbers potentially eligible, examined for eligibility, confirmed eligible, included in the study, completing follow-up, and analysed | eTable 6 |
|                              |         | (b) Give reasons for non-participation at each stage                                                                                                                                              | eTable 6 |
|                              |         | (c) Consider use of a flow diagram                                                                                                                                                                | eTable 6 |
| Descriptive data             | 14*     | (a) Give characteristics of study participants (eg demographic, clinical, social) and information on exposures and potential confounders                                                          | 10-11    |

|                          |     |                                                                                                                                                                                                                                                                                                                                                                                                               |                      |
|--------------------------|-----|---------------------------------------------------------------------------------------------------------------------------------------------------------------------------------------------------------------------------------------------------------------------------------------------------------------------------------------------------------------------------------------------------------------|----------------------|
|                          |     | (b) Indicate number of participants with missing data for each variable of interest                                                                                                                                                                                                                                                                                                                           | Shown in every table |
|                          |     | (c) Summarise follow-up time (eg, average and total amount)                                                                                                                                                                                                                                                                                                                                                   | N/A                  |
| Outcome data             | 15* | Report numbers of outcome events or summary measures over time                                                                                                                                                                                                                                                                                                                                                | 11                   |
| Main results             | 16  | (a) Give unadjusted estimates and, if applicable, confounder-adjusted estimates and their precision (eg, 95% confidence interval). Make clear which confounders were adjusted for and why they were included<br>(b) Report category boundaries when continuous variables were categorized<br>(c) If relevant, consider translating estimates of relative risk into absolute risk for a meaningful time period | N/A<br>N/A<br>N/A    |
| Other analyses           | 17  | Report other analyses done—eg analyses of subgroups and interactions, and sensitivity analyses                                                                                                                                                                                                                                                                                                                | N/A                  |
| <b>Discussion</b>        |     |                                                                                                                                                                                                                                                                                                                                                                                                               |                      |
| Key results              | 18  | Summarise key results with reference to study objectives                                                                                                                                                                                                                                                                                                                                                      | 12-13                |
| Limitations              | 19  | Discuss limitations of the study, taking into account sources of potential bias or imprecision. Discuss both direction and magnitude of any potential bias                                                                                                                                                                                                                                                    | 14-15                |
| Interpretation           | 20  | Give a cautious overall interpretation of results considering objectives, limitations, multiplicity of analyses, results from similar studies, and other relevant evidence                                                                                                                                                                                                                                    | 15-16                |
| Generalisability         | 21  | Discuss the generalisability (external validity) of the study results                                                                                                                                                                                                                                                                                                                                         | 12-13                |
| <b>Other information</b> |     |                                                                                                                                                                                                                                                                                                                                                                                                               |                      |
| Funding                  | 22  | Give the source of funding and the role of the funders for the present study and, if applicable, for the original study on which the present article is based                                                                                                                                                                                                                                                 | 18                   |

\*Give information separately for exposed and unexposed groups.

**Note:** An Explanation and Elaboration article discusses each checklist item and gives methodological background and published examples of transparent reporting. The STROBE checklist is best used in conjunction with this article (freely available on the Web sites of PLoS Medicine at <http://www.plosmedicine.org/>, Annals of Internal Medicine at <http://www.annals.org/>, and Epidemiology at <http://www.epidem.com/>). Information on the STROBE Initiative is available at <http://www.strobe-statement.org>.



# BMJ Open

## Persons Diagnosed with COVID-19 in England in the Clinical Practice Research Datalink (CPRD): A Cohort Description

|                                 |                                                                                                                                                                                                                                                                                                                                                                                                     |
|---------------------------------|-----------------------------------------------------------------------------------------------------------------------------------------------------------------------------------------------------------------------------------------------------------------------------------------------------------------------------------------------------------------------------------------------------|
| Journal:                        | <i>BMJ Open</i>                                                                                                                                                                                                                                                                                                                                                                                     |
| Manuscript ID                   | bmjopen-2023-073866.R1                                                                                                                                                                                                                                                                                                                                                                              |
| Article Type:                   | Original research                                                                                                                                                                                                                                                                                                                                                                                   |
| Date Submitted by the Author:   | 09-Nov-2023                                                                                                                                                                                                                                                                                                                                                                                         |
| Complete List of Authors:       | Andersen, Kathleen; Pfizer Inc<br>McGrath, Leah; Pfizer Inc<br>Reimbaeva, Maya; Pfizer Inc<br>Mendes, Diana; Pfizer Ltd<br>Nguyen, Jennifer; Pfizer Inc<br>Rai, Kiran; Adelphi Real World<br>Tritton, Theo; Adelphi Real World<br>Tsang, Carmen; Pfizer Ltd<br>Malhotra, Deepa; Pfizer Inc<br>Yang, Jingyan; Pfizer Inc; Columbia University, Institute for Social and Economic Research and Policy |
| <b>Primary Subject Heading</b>: | Infectious diseases                                                                                                                                                                                                                                                                                                                                                                                 |
| Secondary Subject Heading:      | Epidemiology                                                                                                                                                                                                                                                                                                                                                                                        |
| Keywords:                       | COVID-19, Primary Health Care, Epidemiology < TROPICAL MEDICINE                                                                                                                                                                                                                                                                                                                                     |
|                                 |                                                                                                                                                                                                                                                                                                                                                                                                     |

SCHOLARONE™  
Manuscripts

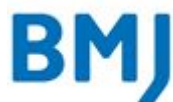

I, the Submitting Author has the right to grant and does grant on behalf of all authors of the Work (as defined in the below author licence), an exclusive licence and/or a non-exclusive licence for contributions from authors who are: i) UK Crown employees; ii) where BMJ has agreed a CC-BY licence shall apply, and/or iii) in accordance with the terms applicable for US Federal Government officers or employees acting as part of their official duties; on a worldwide, perpetual, irrevocable, royalty-free basis to BMJ Publishing Group Ltd ("BMJ") its licensees and where the relevant Journal is co-owned by BMJ to the co-owners of the Journal, to publish the Work in this journal and any other BMJ products and to exploit all rights, as set out in our [licence](#).

The Submitting Author accepts and understands that any supply made under these terms is made by BMJ to the Submitting Author unless you are acting as an employee on behalf of your employer or a postgraduate student of an affiliated institution which is paying any applicable article publishing charge ("APC") for Open Access articles. Where the Submitting Author wishes to make the Work available on an Open Access basis (and intends to pay the relevant APC), the terms of reuse of such Open Access shall be governed by a Creative Commons licence – details of these licences and which [Creative Commons](#) licence will apply to this Work are set out in our licence referred to above.

Other than as permitted in any relevant BMJ Author's Self Archiving Policies, I confirm this Work has not been accepted for publication elsewhere, is not being considered for publication elsewhere and does not duplicate material already published. I confirm all authors consent to publication of this Work and authorise the granting of this licence.

1  
2  
3 **PERSONS DIAGNOSED WITH COVID-19 IN ENGLAND IN THE**  
4 **CLINICAL PRACTICE RESEARCH DATALINK (CPRD):**  
5 **A COHORT DESCRIPTION**  
6  
7  
8  
9

10 Kathleen M. Andersen, PhD MSc;<sup>1</sup> Leah J. McGrath, PhD;<sup>1</sup> Maya Reimbaeva, MS;<sup>1</sup>  
11 Diana Mendes, PhD;<sup>2</sup> Jennifer L. Nguyen, ScD MPH MHCI;<sup>1</sup>  
12 Kiran K. Rai, PhD;<sup>3</sup> Theo Tritton, MSc;<sup>3</sup> Carmen Tsang, PhD;<sup>2</sup>  
13 Deepa Malhotra, MS;<sup>1</sup> Jingyan Yang, DrPH MHS<sup>1,4</sup>  
14  
15  
16  
17

- 18 1. Pfizer Inc, New York, NY 10001
- 19 2. Pfizer Ltd, Tadworth, UK
- 20 3. Adelphi Real World, Bollington, UK
- 21 4. Institute for Social and Economic Research and Policy, Columbia University,  
22 New York, NY 10027  
23  
24  
25  
26  
27  
28

29 **Corresponding Author:**

30 Kathleen M. Andersen, PhD  
31 Director, mRNA Vaccines Real World Evidence  
32 Pfizer Inc.  
33 New York, NY  
34 Phone: 443-540-9961  
35 Email: [kathleen.andersen@pfizer.com](mailto:kathleen.andersen@pfizer.com)  
36  
37  
38  
39  
40  
41  
42

43 Length: text 4,049; tables and figures 5  
44  
45  
46  
47  
48  
49  
50  
51  
52  
53  
54  
55  
56  
57  
58  
59  
60

**ABSTRACT (347/400 words)**

Objective: To create case definitions for confirmed COVID-19 diagnoses, COVID-19 vaccination status, and three separate definitions of high risk of severe COVID-19, as well as to assess whether the implementation of these definitions in a cohort reflected the sociodemographic and clinical characteristics of COVID-19 epidemiology in England.

Design: Retrospective cohort study

Setting: Electronic healthcare records from primary care (Clinical Practice Research Datalink, or CPRD) linked to secondary care data (Hospital Episode Statistics, or HES) data covering 24% of the population in England

Participants: 2,271,072 persons aged 1 year and older diagnosed with COVID-19 in CPRD Aurum between August 1, 2020 through January 31, 2022.

Main Outcome Measures: Age, sex, and regional distribution of COVID-19 cases and COVID-19 vaccine doses received prior to diagnosis were assessed separately for the cohorts of cases identified in primary care and those hospitalized for COVID-19 (primary diagnosis code of ICD-10 U07.1 "COVID-19"). Smoking status, body mass index and Charlson Comorbidity Index were compared for the two cohorts, as well as for three separate definitions of high risk of severe disease used in the United Kingdom (NHS Highest Risk, PANORAMIC trial eligibility, UK Health Security Agency Clinical Risk prioritization for vaccination).

Results: Compared to national estimates, CPRD case estimates underrepresented older adults in both the primary care (age 65-84: 6% in CPRD vs 9% nationally) and hospitalized (31% vs 40%) cohorts, and overrepresented people living in regions with the highest median wealth areas of England (20% primary care and 20% hospital admitted cases in South East, vs 15% nationally). The majority of non-hospitalized cases and all hospitalized cases had not completed primary series vaccination. In primary care, persons meeting high risk definitions were older, more often smokers, overweight or obese, and had higher Charlson Comorbidity Index score.

Conclusions: CPRD primary care data is a robust real-world data source and can be used for some COVID-19 research questions, however limitations of the data availability should be carefully considered. Included in this publication are supplemental files for a

1  
2  
3 total of over 28,000 codes to define each of three definitions of high risk of severe  
4 disease.  
5  
6  
7

## 8 **STRENGTHS AND LIMITATIONS OF THIS STUDY**

9

- 10 • Definitions were built using reproducible methods with independent local clinician  
11 review and can be leveraged for future work.
- 12 • Results were compared to government published COVID-19 case and  
13 vaccination counts and were found to be similar, which demonstrates external  
14 validity of this data source.
- 15 • Limitations of the data include data recency lag, with primary care data ending in  
16 April 2022 and hospitalization data ending in March 2021.
- 17 • Owing to the primary care setting of the data, this study does not represent  
18 people without a general practitioner, or those who presented directly to hospital  
19 without a prior COVID-19-related primary care encounter.  
20  
21  
22  
23  
24  
25  
26  
27  
28  
29  
30  
31  
32  
33  
34  
35  
36  
37  
38  
39  
40  
41  
42  
43  
44  
45  
46  
47  
48  
49  
50  
51  
52  
53  
54  
55  
56  
57  
58  
59  
60

## INTRODUCTION

As of 3 February 2023, there have been over 20 million confirmed COVID-19 cases and more than 183,000 related deaths in England.[1] COVID-19 severity ranges from asymptomatic cases to severe disease requiring hospital admission and sometimes death, with older adults and people with chronic health conditions at disproportionate risk.[2,3] Therefore, electronic health records (EHR) with longstanding capture of patients' medical history are uniquely positioned to answer population-based questions related to healthcare resource utilization, economic impact, and pharmaceutical intervention associated with COVID-19.

The Clinical Practice Research Datalink (CPRD) is a longitudinal and anonymized EHR database of primary health care interactions in England.[4] Primary care is the cornerstone of healthcare in England, with over 98% of the population registered with a general practitioner (GP). From August 2020 through March 2022, all tests booked via the National Health Service (NHS) website for polymerase chain reaction (PCR) tests for SARS-CoV-2, regardless of result, were reported to GP offices that use the EMIS electronic health record software.[5] Similarly, COVID-19 vaccines administered at any location in the country were also mandated to be reported to patient's GP.[6] Thus, during this period, CPRD can be considered a closed network of confirmed COVID-19 cases for persons in the network, with accurate information on COVID-19 vaccination status.

While the CPRD has been used in over 3,000 peer-reviewed publications, it is not known whether interruptions in healthcare, particularly in-person primary care visits, during the first years of the coronavirus pandemic affected the previously described characteristics of the CPRD population. The objective of this study was to create case definitions for COVID-19 diagnoses, COVID-19 vaccination, and three separate definitions of high risk of severe COVID-19. Second, we aimed to evaluate these definitions in a sample of persons with COVID-19, using the CPRD, to assess whether this cohort's sociodemographic and clinical characteristics were generalizable to

1  
2  
3 population-level COVID-19 epidemiology in England. The methodology developed in the  
4 study can be leveraged in future COVID-19 research in CPRD data.  
5  
6  
7

## 8 **METHODS**

### 9 **Study Setting and Population**

10 CPRD Aurum contains data which is routinely collected from primary care practices that  
11 use the EMIS Web® digital clinical system that includes electronic patient records.[7]  
12 The May 2022 release of CPRD Aurum contained data from approximately 24% of  
13 persons in England.[8,9] Data captured include age, sex, body weight, medical  
14 diagnoses, referrals to specialists and/or secondary care, prescriptions issued in  
15 primary care, laboratory tests, vaccinations administered, smoking and alcohol  
16 consumption status, and all other types of care delivered as part of routine primary care  
17 practice.  
18  
19  
20  
21  
22  
23  
24  
25  
26

27 CPRD Aurum was linked to Hospital Episode Statistics Admitted Patient Care (HES  
28 APC) records, using deterministic patient-level linkage with an 8-stage algorithm carried  
29 out by NHS Digital. Over 99% of practices contributing to CPRD Aurum participate in  
30 HES linkage. The HES APC dataset includes patient demographics, date and method of  
31 hospital admission and discharge, diagnoses, specialty care, and procedures. HES  
32 APC data from April 1997 to March 2021 was available in this study.  
33  
34  
35  
36  
37  
38  
39

### 40 **Inclusion and Exclusion Criteria**

41 We included persons of any age diagnosed with COVID-19 (described below) from 1  
42 August 2020 through 31 January 2022. First, we required records to be of acceptable  
43 research quality, as defined by CPRD. Second, we required people to be continuously  
44 registered with their GP practice for at least 365 days prior to COVID-19 diagnosis, to  
45 establish pre-COVID-19 health history. Third, we required persons to be HES APC  
46 linkage eligible to ensure the exclusion of patients where confirmed hospital admission  
47 status (via HES APC, during the time period available) could not be known. Fourth, we  
48 excluded persons who were admitted to the hospital with a primary diagnosis of U07.1  
49 on or before their primary care recorded date of COVID-19 diagnosis. Due to mandatory  
50  
51  
52  
53  
54  
55  
56  
57  
58  
59  
60

1  
2  
3 reporting guidelines, the GP's date of notification from the hospital may be delayed from  
4 the date of true test collection and therefore may not accurately reflect date of  
5 diagnosis. Lastly, we excluded persons with a registration end date, practice last  
6 collection date or death date that was prior to their COVID-19 diagnosis.  
7  
8  
9

### 10 11 12 **COVID-19 Case Definition**

13 With each monthly data release, CPRD publishes feasibility counts for SARS-CoV-2  
14 related codes in CPRD primary care data with corresponding code lists.[8,10] The code  
15 types include vaccination, tests (including PCR, antibody and antigen tests), diagnosis,  
16 advice, possible cases, and post-COVID-19 clinic referral codes. Three reviewers (KA,  
17 QM, AS) independently screened the CPRD code list to determine which of the codes  
18 represented a confirmed and current infection. Discrepancies were adjudicated by a  
19 fourth reviewer (LM), and the final definition for the COVID-19 case definition was  
20 reviewed by UK and non-UK clinicians (**Supplemental file 1, Table 1**). We defined a  
21 current and confirmed COVID-19 episode as a diagnosis code, positive PCR, or antigen  
22 test. We did not include COVID-19 vaccination, antibody tests, possible cases,  
23 exposure to COVID-19 or post-COVID-19 clinic referral codes in the COVID-19 case  
24 definition.  
25  
26  
27  
28  
29  
30  
31  
32  
33  
34  
35

36 Hospitalizations for COVID-19 were defined as persons admitted with a primary  
37 diagnosis of COVID-19 (ICD-10 U07.1 "COVID-19") within 12 weeks of the initial  
38 diagnosis recorded in primary care. Non-hospitalized COVID-19 cases were defined as  
39 the subset of persons for whom secondary care data were available but had no record  
40 of hospital admission. Primary care COVID-19 cases were defined as persons who  
41 were not admitted to the hospital within 12 weeks of diagnosis, and those after April 1,  
42 2021 for which hospital admission data were not available.  
43  
44  
45  
46  
47  
48  
49

### 50 51 52 **COVID-19 Vaccination Definition**

53 The first COVID-19 vaccine dose in England was administered on 8 December 2020,  
54 with the initially limited supply prioritized for groups as outlined by the Joint Committee  
55 for Vaccinations and Immunisations (JCVI).[11] In England, COVID-19 vaccines  
56  
57  
58  
59



1  
2  
3 produced by Pfizer-BioNTech and Moderna have been available since December 2020.  
4 In April 2021, JCVI announced that persons who received a first dose of an  
5 AstraZeneca vaccine would receive a second dose of the same brand but persons who  
6 had not yet received a vaccine dose would be “preferentially offered an alternative”.<sup>[12]</sup>  
7 This study did not consider Novavax vaccinations, as it was approved for use after our  
8 index date, or the Janssen or Valneva vaccines, which have not been used in England  
9 as of February 2023.<sup>[13]</sup>  
10  
11  
12  
13  
14  
15  
16

17 In Phase 1 (December 2020 - March 2021), people aged 50 and older, as well as front-  
18 line health and social care workers, clinically extremely vulnerable persons and persons  
19 aged 16 and older with underlying health conditions were eligible to receive two doses.  
20 In Phase 2 (beginning April 2021), access broadened for persons aged 18-49 to receive  
21 two doses. Additionally, immunocompromised persons who received two doses in  
22 phase 1 were recommended to receive a third dose at least eight weeks after their  
23 second dose in order to complete their primary series. Phase 3 included a single dose  
24 for 16–17-year-olds in August 2021. In September 2021, 12–15-year-olds could receive  
25 a single dose and a booster dose for adults was recommended at least 6 months after  
26 the completion of a primary series. In November 2021, 12–17-year-olds could receive a  
27 second dose, and the recommendation for booster dose was shortened to at least 3  
28 months after the completion of a primary series.<sup>[11]</sup>  
29  
30  
31  
32  
33  
34  
35  
36  
37  
38

39 We used a combination of product codes, which specify brand and dose of vaccine, as  
40 well as medical codes which indicated administration of a non-specific COVID-19  
41 vaccine (**Supplemental file 1, Table 2**). The code lists were derived from the published  
42 set by CPRD.<sup>[10]</sup> While patients may have multiple vaccination codes in their record on  
43 a given day, such as a code to indicate both the administration as well as a separate  
44 code for the specific product given, persons were not counted as receiving as more than  
45 one vaccine dose per day.  
46  
47  
48  
49  
50  
51  
52

53 Vaccination status at COVID-19 diagnosis date was reported, regardless of brand, and  
54 separately for immunocompromised versus non-immunocompromised persons.  
55  
56  
57  
58  
59  
60

1  
2  
3 Persons were considered unvaccinated if there was no record of COVID-19 vaccination,  
4 or for up to 13 days after first dose to account for time needed to build immunity  
5 following immunisation. Dose 1 was defined starting 14 days after the record of the first  
6 COVID-19 vaccine administration until 13 days after the receipt of second dose, or until  
7 end of follow-up. Dose 2 was defined starting 14 days after the record of the second  
8 COVID-19 vaccine administration and administered at least 21 days after the first dose.  
9 Persons were considered to have had 2 doses until 13 days before their next vaccine.  
10 For non-immunocompromised persons, the primary vaccination series was complete 14  
11 days after second dose. For immunocompromised persons only, dose 3 was part of  
12 their primary series at least 21 days after their second dose. First booster doses (winter  
13 2021) were defined 21 or more days after the receipt of the last dose in primary series.  
14 For all vaccination definitions, no upper limit on time between doses was applied.  
15  
16  
17  
18  
19  
20  
21  
22  
23  
24  
25

### 26 **COVID-19 Risk Status**

27 We considered three separate definitions of COVID-19 risk status, each of which are set  
28 forth by different groups and capture non-intersecting populations. First, the NHS  
29 highest risk group, which was a list of conditions set forth by an advisory group  
30 commissioned by England's Deputy Chief Medical Officer to identify persons at the very  
31 highest risk of COVID-19 hospital admission and death.[14] Second, eligibility for the  
32 PANORAMIC study, which began in December 2021 and is a platform randomized trial  
33 of antiviral therapeutic agents.[15] The persons who qualify for antiviral treatment in the  
34 trial are those at a higher risk of hospital admission and death. Third, UK Health  
35 Security Agency (UKHSA) clinical risk groups as outlined in "The Green Book" chapter  
36 14a, which is COVID-19 vaccination prioritization from the JCVI.[16] For each of these  
37 three risk definitions, we operationalized the clinical conditions lists into SNOMED and  
38 ICD-10 code lists. Where available, we used published code lists.[17–23] For concepts  
39 not found in the literature, we developed wildcard-based search terms in the CPRD  
40 code browser (**Supplemental file 1, Tables 3-5**). At least one practicing clinician from  
41 the UK, who were independent and external to Pfizer, reviewed each of the search term  
42 strategies, as well as ensuing code lists.  
43  
44  
45  
46  
47  
48  
49  
50  
51  
52  
53  
54  
55  
56  
57  
58  
59  
60

### Comparison to Publicly Available Data

We compared our results to estimates published on the UK Government's Coronavirus dashboard, and restricted results to those specific to England, as the CPRD Aurum population that is HES-linkage eligible contains data from England only.[24,25] The data in this manuscript reflect figures from the dashboard as accessed on 31 January 2023. Where possible, we restricted the dashboard to cases from 1 August 2020 through 31 January 2022 to reflect the study period, although age, sex and region-specific estimates were reported "since the start of the pandemic".[24,25] For whole country (non-COVID-19 related) comparisons, we used the Office of National Statistics' 2021 Census.[9]

### Statistical Analyses

All results are presented separately for the cohorts of persons with primary care versus hospitalized COVID-19 cases. Continuous variables are presented as means (standard deviations) or medians (interquartile ranges) and categorical variables as counts (percentages). Missing data for sex, region, smoking status and BMI is shown in tables. The absence of codes for comorbidities was assumed to be the absence of the comorbidity rather than missing data. Standardized mean differences (SMD) were used to compare groups, with SMD > 10% indicating significant difference. As per CPRD privacy rules, any cell with 10 persons or fewer (but not zero) was suppressed and other cells related to the small cell count were redacted to ensure no back-calculation could populate the count.

Data management and analyses for this study used SAS, version 9.4 (SAS Institute, Cary, North Carolina).

### Patient and Public Involvement

There were no directly involved patients or public involvement in this study.

## RESULTS

1  
2  
3 From 1 August 2020 through 31 January 2022, the UK Government's Coronavirus  
4 dashboard reported 14,744,991 COVID-19 cases in England.[24] The final CPRD  
5 cohort contained 2,271,072 persons diagnosed with COVID-19, regardless of care  
6 setting, in England in the same time period (**Supplemental file 1, Table 6**). The case  
7 trends followed national estimates, with a series of peaks and troughs with a large peak  
8 in winter 2021 (**Supplemental file 1, Figures 1 and 2**). Hospital admissions increased  
9 in fall 2020 and winter 2020 (**Supplemental file 1, Figure 3**).

10  
11  
12  
13  
14  
15  
16  
17 There were 2,257,907 persons with COVID-19 cases observed in primary care, which  
18 included persons who were not hospitalized during the period of time for which hospital  
19 admission data was available (n=522,288) as well as all COVID-19 diagnoses recorded  
20 in the period where hospital admission data ended (n=1,735,619). Separately, there  
21 were 13,165 persons (2% of COVID-19 cases from August 2020 to March 2021) who  
22 were hospitalized within 12 weeks of initial COVID-19 diagnosis with a primary  
23 diagnosis of COVID-19 (**Figure 1**).

### 30 31 **Characteristics of COVID-19 Cases**

32 For both primary care and hospitalized cases, the majority of persons with COVID-19 in  
33 CPRD were adults aged 18-64 (**Table 1**). The age distribution of CPRD primary care  
34 cases generally followed the national case count distribution, with young and middle-  
35 aged adults representing the largest groups, as well as the largest fraction of the  
36 English population (**Supplemental file 1, Table 7**). Older adults were underrepresented  
37 in both cohorts as compared to national population estimates. Within the primary care  
38 cohort, 6% of patients were aged 65-84 years, whereas 9% of national COVID-19 cases  
39 occurred in this age group. Notable differences were observed in the hospitalized cohort  
40 when compared to the national estimates; 31% vs. 40% were aged 65 - 84 years, and  
41 8% vs. 21% aged  $\geq 85$  years, respectively.

42  
43  
44  
45  
46  
47  
48  
49  
50  
51 The sex distribution of COVID-19 cases in the primary care cohort was comparable to  
52 national estimates, with 55% female in each (**Table 1 and Supplemental file 1, Table**

1  
2  
3 **7)**. There were more males (57%) than females in the hospitalized cohort; there are no  
4 national sex-specific hospital admission counts available.  
5  
6  
7

8 The regional distributions of the CPRD primary care and hospitalized cohorts were  
9 similar to each other, but not the overall country. Both of the study cohorts had larger  
10 proportions of persons with GP practices in higher income regions of England as  
11 compared to national case counts.[26] For example, 20% of persons in the primary care  
12 cohort and 20% in the hospitalized cohort lived in South East region of England, the  
13 region with the highest median total household wealth as reported in March 2020. This  
14 is compared to 20% of CPRD contributing practices, 15% of all English cases and 16%  
15 of the population lived in London (**Supplemental file 1, Table 8**). Similar trends are  
16 seen with lower median total household wealth regions being proportionally  
17 underrepresented in the COVID-19 CPRD cohort as compared to national case  
18 estimates or population distribution.  
19  
20  
21  
22  
23  
24  
25  
26  
27  
28

### 29 **COVID-19 Vaccination Status**

30 At the time of COVID-19 diagnosis, 27% of non-immunocompromised persons and 36%  
31 of immunocompromised persons had completed a primary series of COVID-19  
32 vaccination (**Table 2**). Among the non-immunocompromised hospitalized COVID-19  
33 cases, 98% were unvaccinated and none had completed a primary series. For  
34 immunocompromised hospitalized COVID-19 cases, 56% were unvaccinated, 44% had  
35 received one dose, and none had completed a primary series. As of 1 December 2021,  
36 86% of adults had  $\geq 1$  and 80% had  $\geq 2$  COVID-19 vaccine doses (2% and 0.2% lower  
37 than official reports, respectively).  
38  
39  
40  
41  
42  
43  
44  
45

### 46 **Populations at Risk of Severe Disease**

47 After wildcard searches, clinicians reviewed nearly 50,000 codes to set the definitions  
48 for high-risk lists. The final lists contained 12,390 codes for NHS Highest Risk, 9,132  
49 codes for PANORAMIC trial criteria and 7,343 codes for UKHSA Clinical Risk  
50 (**Supplemental files 2-4**). In the primary care cohort, 11% met NHS Highest Risk, 31%  
51 PANORAMIC, and 10% UKHSA Clinical Risk criteria (**Table 3**). With each definition,  
52  
53  
54  
55  
56  
57  
58  
59  
60

1  
2  
3 primary care cohort cases at high risk were more often current smokers (ranging from  
4 17-21% vs 13% in full cohort) or former smokers (24-28% vs 13%), overweight (16-  
5 19%, vs 9%) or obese (20-28%, vs 10%), and a larger proportion had at least 1  
6 comorbidity in the Charlson Index (29-54%, vs 11%), where this was recorded. Primary  
7 care cases at high risk of severe disease were also older (mean age 49-55 years, vs 34  
8 years), more often female (55-63%, vs 54%), and had more recorded vaccine doses  
9 prior to COVID-19 diagnosis (**Supplemental file 1, Table 9**).

10  
11  
12 Among hospitalized COVID-19 cases, 33% met NHS Highest Risk, 84% PANORAMIC,  
13 and 41% UKHSA Clinical Risk criteria's (**Supplemental file 1, Table 4**). The high risk  
14 hospitalized groups were similar to the overall hospitalized cohort. Nearly half of  
15 persons were current smokers (13-16%, vs 13%) or former smokers (32-39%, vs 29%),  
16 and more than half were overweight (20-23%, vs 18%) or obese (37-42%, vs 35%).  
17 Among the hospital admitted cohort, people meeting each high-risk definition were older  
18 (mean age 65-66 years, vs 60 years) (**Supplemental file 1, Table 10**). Subgroups of  
19 patients with the NHS and UKHSA definitions had higher mean Charlson Comorbidity  
20 Indexes, and more females, than high risk patients identified with the PANORAMIC  
21 criteria or the entire hospitalized population.

## 22 23 24 25 26 27 28 29 30 31 32 33 34 35 36 **DISCUSSION**

### 37 **Key Results**

38 In this work, we defined and benchmark results from three key variables related to  
39 COVID-19 research using CPRD: index COVID-19 diagnoses, COVID-19 vaccinations,  
40 and persons at high risk of severe disease.  
41  
42  
43  
44  
45  
46  
47

48 We identified 2,271,072 COVID-19 cases in CPRD Aurum between 1 August 2020  
49 through 31 January 2022. Younger age and lower socioeconomic deprivation have  
50 been consistently associated with reductions in COVID-19 incidence and  
51 severity.[27,28] These factors may explain why this CPRD cohort, which proportionally  
52 underrepresented persons age 65 and older and overrepresented persons living in the  
53  
54  
55  
56  
57  
58  
59  
60

1  
2  
3 regions with higher median total household wealth, captured 15% of COVID-19 cases in  
4 a database that covers 24% of persons in England. The requirement for an NHS  
5 number in order for results to be shared may explain some of this attrition as well.  
6  
7 Future work using CPRD for COVID-19 research will need to consider these limitations  
8  
9 of under ascertainment of cases. Moving beyond this study's time period, the transition  
10  
11 to at home testing, as well as the end of free PCR testing for the general public on April  
12  
13 1, 2022, will need to be additionally considered.  
14  
15

16  
17 This manuscript reports results from a case definition of confirmed and current infection.  
18 We did not include codes for immunoglobulin titers, as measurable antibodies indicate a  
19 resolved infection rather than date of onset. We did not include codes indicating a  
20 sequela of prior infection, as these most often occur on a later date than index  
21 diagnosis. We did not include codes indicating a test without a result, as people with a  
22 negative test result should not be included in a COVID-19 case definition. Our results  
23 therefore identified fewer cases, although with greater specificity, than other studies in  
24 published literature that allow for such heterogeneity.[29]  
25  
26  
27  
28  
29  
30  
31

32 COVID-19 vaccination events were well captured in the CPRD. This stands in stark  
33 contrast to most administrative claims and EHR databases in the United States, where  
34 less than 50% of COVID-19 vaccines are recorded in comparison to estimates provided  
35 by the Centers for Disease Control and Prevention.[30,31] England's national  
36 healthcare system, as well as the NHS data infrastructure to facilitate capture of  
37 COVID-19-related events and longstanding structure of general practitioners as the  
38 central node in a person's healthcare coordination, enabled the high coverage of  
39 COVID-19 vaccination records. Researchers can be more confident with CPRD data  
40 that the absence of a vaccination record indicates unvaccinated status than they  
41 otherwise would be with most other real-world datasets, which is a critical consideration  
42 for studies related to COVID-19 disease burden, vaccination, or treatments.  
43  
44  
45  
46  
47  
48  
49  
50  
51

52  
53 The proportion of persons who had completed primary series vaccination prior to  
54 infection was low among primary care cases. Notably, among hospitalized cases, no  
55  
56  
57  
58  
59  
60



1  
2  
3 patients had completed a primary COVID-19 vaccination series. These findings may be  
4 explained by several factors. First, the COVID-19 vaccine was first made available in  
5 England on 8 December 2020, and initially second doses were given up to 12 weeks  
6 later to maximize limited supply for as many people as possible. Therefore, the calendar  
7 period under study allowed for most persons to have had a COVID-19 diagnosis in  
8 periods at which “full vaccination” was not achievable. Second, it is possible that one  
9 vaccine offered protection against severe illness.[32–34]  
10  
11  
12  
13  
14  
15  
16

17 We operationalized a total of over 28,000 codes, from an initial set of nearly 50,000, for  
18 three definitions of persons at risk of severe disease. We have made the search terms  
19 available, for reproducibility, as well as the resulting code lists, for other research  
20 groups to implement in their work. After the completion of this work, NHS Digital  
21 published a code list for “Targeted Conditions”, which includes each element in the NHS  
22 Highest Risk category. Among these, the NHS code list can be repurposed for 4 of the  
23 14 conditions in PANORAMIC criteria and 3 of the 11 conditions in UKHSA Clinical  
24 Risk. To our knowledge, we offer the first publication of code lists for capture of all  
25 elements in the PANORAMIC criteria as well as UKHSA Clinical Risk criteria for these  
26 high-risk definitions, which can now be readily used in datasets that contain CPRD  
27 medical and product, ICD-10 and OPCS Classification of Interventions and Procedures  
28 codes.  
29  
30  
31  
32  
33  
34  
35  
36  
37  
38

39 While there are similarities between the three definitions, differences do exist. In the  
40 example of renal disease, NHS Highest Risk defines as chronic kidney disease stage 4  
41 or 5, PANORAMIC trial criteria stipulate stage 2 or 3, and UKHSA Clinical Risk are for  
42 stages 3-5. PANORAMIC trial eligibility capture persons with mild renal disease, as  
43 some antiviral treatments are not approved for use in persons with severe renal  
44 disease. However, UKHSA Clinical Risk prioritized vaccination access for persons at  
45 highest risk of disease, which would include persons with more advanced renal disease.  
46 Notably, persons who have renal disease as defined by PANORAMIC trial criteria by  
47 definition do not have renal disease by NHS definition, and people in each of these may  
48 (or may not) meet UKHSA prioritization. The choice of which high risk definition to  
49  
50  
51  
52  
53  
54  
55  
56  
57  
58  
59  
60



1  
2  
3 implement in future studies will need to be guided by the study population and research  
4 question.  
5  
6  
7

8 In the primary care cases, persons at high risk were older, more often smokers, had  
9 larger body sizes, and higher Charlson Comorbidity Indices from the overall group of  
10 primary care cases. Among hospitalized cases, the high-risk groups were similar to the  
11 entire hospitalized group. These findings are consistent with existing understanding of  
12 high-risk definitions, and perhaps provide reassurance that the code lists measure the  
13 purported phenomenon.  
14  
15  
16  
17  
18  
19

20 The study periods in this report represent the most recent data available from CPRD as  
21 of 3 February 2023. During the Autumn of 2022, the Aurum database experienced data  
22 quality issues related to the EMIS data flows from legacy systems, and no primary care  
23 data have been made available to researchers since the May 2022 release (data  
24 through March 2022, with some early view of April 2022). Separately, HES secondary  
25 care data have not been updated since March 2021, as NHS Digital has undergone a  
26 change in the way they process and link data. COVID-19 remains a serious disease for  
27 some people, and it is certain that some of the 1.7 million persons diagnosed with  
28 COVID-19 after April 1, 2021 would have been later admitted for COVID-19, but we do  
29 not have the hospital admission data to distinguish them from those whose cases were  
30 managed entirely in the community setting. Throughout, we have used the term  
31 “primary care records” as the combined groups of those known to be non-hospitalized  
32 (cases where HES data were available, but the person was not hospitalized), as well as  
33 those who we have GP encounters for but unknown eventual hospital admission status.  
34 It is difficult to approximate the number of hospital admissions that would be expected  
35 with full data availability. Carrying forward the 2% hospital admission incidence seen in  
36 the early pandemic period may not be appropriate, given 2021 introduced periods of  
37 increased (delta variant) and decreased (omicron variant) risk of hospital admission, as  
38 well the uptake of COVID-19 vaccinations and antiviral treatments. Finally, the  
39 population structure of this cohort outlined in this work further challenge the direct  
40 application of national estimates to CPRD cohorts.  
41  
42  
43  
44  
45  
46  
47  
48  
49  
50  
51  
52  
53  
54  
55  
56  
57  
58  
59  
60

1  
2  
3  
4  
5 The present study does not capture persons not under GP care such as prisoners,  
6 some residential homes, and persons without a place of residence. Additionally, CPRD  
7 Aurum, when linked with HES data, reduces the population to persons registered at  
8 eligible GP practices in England and therefore may not represent persons in other  
9 countries in the UK, or countries outside the UK. This study does not include persons  
10 who presented directly to hospital without any prior GP interaction. In particular, persons  
11 with more severe disease such as older adults may require immediate hospital  
12 admission before seeking primary care, which could explain some of the gaps in  
13 representation we have reported. Given that CPRD is a primary care database, and the  
14 limited time period of hospital data availability, we decided to design our study as an  
15 initial cohort of persons with primary care records of COVID-19. Studies looking for  
16 complete capture of all hospitalized COVID-19 patients might consider other data  
17 sources.  
18  
19  
20  
21  
22  
23  
24  
25  
26  
27  
28

## 29 **CONCLUSION**

30 In conclusion, we present a cohort of over 2 million COVID-19 cases in linked CPRD-  
31 HES data, using published definitions for COVID-19 cases, vaccinations, and each of  
32 three UK-specific definitions of persons at increased risk of severe disease. CPRD  
33 primary care data is a robust real-world data source and can be used for COVID-19  
34 related research questions; however, limitations of the data availability should be  
35 carefully considered.  
36  
37  
38  
39  
40  
41  
42  
43  
44  
45  
46  
47  
48  
49  
50  
51  
52  
53  
54  
55  
56  
57  
58  
59  
60

## ACKNOWLEDGEMENT

### Conflict of Interest Statement

Dr Andersen, Dr McGrath, Ms Reimbaeva, Dr Mendes, Dr Nguyen, Dr Tsang, Ms Malhotra and Dr Yang are employees of Pfizer Inc or Pfizer Ltd and may hold Pfizer stock or stock options. Dr Rai and Mr Tritton are employees of Adelphi Real World which has received consulting fees from Pfizer Inc.

The authors gratefully acknowledge Bethany Backhouse, Poppy Payne, Elke Rottier and Robert Wood from Adelphi Real World (Bollington, UK), Tamuno Alfred, Darren Kailung Jeng, Tendai Mugwagwa, Qiao Mu and Chern Chuan Soo from Pfizer Inc. (New York, United States) Agnieszka Gajewska, Tomasz Mikołajczyk and Ewa Śleszyńska-Dopiera from Quanticate (Warsaw, Poland), and Andy Surinach from Genesis Research (Hoboken, United States).

### Data Sharing Statement

Electronic health records are considered sensitive data in the UK by the Data Protection Act and cannot be shared. The primary care data can be requested via application to the Clinical Practice Research Datalink, with secondary care data and mortality data through linkage upon application. Information is available from <https://www.cprd.com/research-applications>.

### Transparency Statement

Dr Andersen affirms that this manuscript is an honest, accurate, and transparent account of the study being reported; that no important aspects of the study have been omitted; and that any discrepancies from the study as planned (and, if relevant, registered) have been explained.

This study reports pre-specified analyses according to a registered protocol with CPRD (CPRD study number 22\_002062) and Pfizer documented statistical analysis plan (study number KIMS 3106).

### **Role of the Funding Source**

This study was funded by Pfizer Inc (grant number N/A).

### **Contributorship**

Dr Andersen, Dr McGrath, Ms Reimbaeva, Dr Mendes, Dr Nguyen, Dr Tsang, Ms Malhotra and Dr Yang of Pfizer, as well as Dr Rai and Mr Tritton of Adelphi Real World which has received consulting fees from Pfizer, were involved in the study design (collection, analysis, and interpretation of the data), writing of the report, and in the decision to submit the article for publication. All authors had full access to all statistical reports and tables in the study and take responsibility for the integrity of the data and accuracy of the data analysis. All results presented in all tables were quality control verified by a non-Pfizer non-Adelphi employee.

### **Ethics Approval**

CPRD obtains ethical research approval annually from the UK's Health Research Authority Research Ethics Committee to accumulate and distribute patient data. This study is based in part on data from the Clinical Practice Research Datalink obtained under license from the UK Medicines and Healthcare products Regulatory Agency. The data is provided by patients and collected by the NHS as part of their care and support. Office for National Statistics (ONS) and Hospital Episode Statistics (HES) data, copyright © (2021), re-used with the permission of The Health & Social Care Information Center. All rights reserved. The interpretation and conclusions contained in this study are those of the authors alone.

**TABLE 1: Characteristics of COVID-19 Cases in CPRD Aurum, 1 August 2020 – 31 January 2022**

|                                      | Primary Care COVID-19<br>Cases<br>(n = 2,257,907) | Hospitalized COVID-19<br>Cases<br>(n = 13,165) |
|--------------------------------------|---------------------------------------------------|------------------------------------------------|
| Age at COVID-19 diagnosis,<br>years  |                                                   |                                                |
| 1-4                                  | 40,658 (2%)                                       | 15 (< 1%)                                      |
| 5-11                                 | 260,186 (11%)                                     | 21 (< 1%)                                      |
| 12-17                                | 263,800 (11%)                                     | 24 (< 1%)                                      |
| 18-49                                | 1,161,843 (52%)                                   | 3,127 (24%)                                    |
| 50-64                                | 379,528 (17%)                                     | 4,844 (37%)                                    |
| 65-74                                | 92,573 (4%)                                       | 2,386 (18%)                                    |
| 75-84                                | 40,481 (2%)                                       | 1,690 (13%)                                    |
| 85+                                  | 18,838 (1%)                                       | 1,058 (8%)                                     |
| Sex                                  |                                                   |                                                |
| Male                                 | 1,046,275 (46%)                                   | 7,537 (57%)                                    |
| Female                               | 1,211,592 (54%)                                   | 5,628 (43%)                                    |
| Unknown                              | 40 (< 1%)                                         | 0                                              |
| General Practitioner Practice Region |                                                   |                                                |
| North East                           | 83,834 (4%)                                       | 467 (4%)                                       |
| North West                           | 471,195 (21%)                                     | 2,886 (22%)                                    |
| Yorkshire and The Humber             | 71,429 (3%)                                       | 340 (3%)                                       |
| East Midlands                        | 49,651 (2%)                                       | 214 (2%)                                       |
| West Midlands                        | 377,125 (17%)                                     | 2,065 (16%)                                    |
| East of England                      | 95,139 (4%)                                       | 414 (3%)                                       |
| London                               | 424,908 (19%)                                     | 2,984 (23%)                                    |
| South East                           | 448,536 (20%)                                     | 2,682 (20%)                                    |
| South West                           | 235,785 (10%)                                     | 1,113 (8%)                                     |
| Unknown                              | 305 (< 1%)                                        | 0                                              |

**TABLE 2: Vaccination Status at COVID-19 Diagnosis in CPRD Aurum, 1 August 2020 – 31 January 2022**

|                             | Primary Care COVID-19<br>Cases<br>(n = 2,257,907) | Hospitalized COVID-19<br>Cases<br>(n = 13,165) |
|-----------------------------|---------------------------------------------------|------------------------------------------------|
| Non-immunocompromised       | 2,193,241 (100%)                                  | 12,984 (100%)                                  |
| Unvaccinated                | 1,170,509 (53%)                                   | 12,744 (98%)                                   |
| 1 COVID-19 vaccine dose     | 173,853 (8%)                                      | 240 (2%)                                       |
| 2 COVID-19 vaccine<br>doses | 598,367 (27%)                                     | 0                                              |
| First booster               | 250,512 (12%)                                     | 0                                              |
| Immunocompromised           | 64,666 (100%)                                     | 181 (100%)                                     |
| Unvaccinated                | 1,306 (2%)                                        | 102 (56%)                                      |
| 1 COVID-19 vaccine dose     | 6,033 (9%)                                        | 79 (44%)                                       |
| 2 COVID-19 vaccine<br>doses | 33,953 (53%)                                      | 0                                              |
| 3 COVID-19 vaccine<br>doses | 23,108 (36%)                                      | 0                                              |
| First booster               | 266 (< 1%)                                        | 0                                              |

**Table 3: Clinical Characteristics of Primary Care COVID-19 Cases in CPRD Aurum, by High-Risk Definitions**

|                                       | All<br>(n =<br>2,257,907) | Meeting NHS<br>Highest Risk<br>Conditions<br>(n = 249,972) | Meeting<br>PANORAMIC<br>Criteria<br>(n = 691,593) | Meeting<br>UKHSA<br>Clinical<br>Risk<br>(n =<br>225,051) |
|---------------------------------------|---------------------------|------------------------------------------------------------|---------------------------------------------------|----------------------------------------------------------|
| Primary care cases meeting definition | --                        | 11%                                                        | 31%                                               | 10%                                                      |
| Smoking status                        |                           |                                                            |                                                   |                                                          |
| Current smoker                        | 298,735 (13%)             | 44,365 (17%)                                               | 121,019 (18%)                                     | 46,436 (21%)                                             |
| Former smoker                         | 285,722 (13%)             | 67,637 (26%)                                               | 168,343 (24%)                                     | 63,124 (28%)                                             |
| Never smoked                          | 580,239 (26%)             | 87,217 (34%)                                               | 228,579 (33%)                                     | 77,157 (34%)                                             |
| Unknown                               | 1,093,211 (48%)           | 60,753 (23%)                                               | 173,652 (25%)                                     | 38,334 (17%)                                             |
| Body mass index (kg/m <sup>2</sup> )  |                           |                                                            |                                                   |                                                          |
| Mean (standard deviation)             | 27.6 (7.1)                | 29.1 (6.9)                                                 | 29.5 (6.7)                                        | 29.5 (7.5)                                               |
| Underweight (< 18.5)                  | 45,194 (2%)               | 3,720 (1%)                                                 | 5,305 (1%)                                        | 5,926 (3%)                                               |
| Not overweight (18.5-24.9)            | 226,272 (10%)             | 35,766 (14%)                                               | 81,363 (12%)                                      | 36,716 (16%)                                             |
| Overweight (25.0-29.9)                | 204,360 (9%)              | 45,261 (17%)                                               | 113,863 (16%)                                     | 43,758 (19%)                                             |
| Obese (≥30.0)                         | 219,253 (10%)             | 53,814 (21%)                                               | 138,035 (20%)                                     | 62,494 (28%)                                             |
| Unknown                               | 1,562,828 (69%)           | 121,411 (47%)                                              | 353,027 (51%)                                     | 76,157 (34%)                                             |
| Charlson Comorbidity Index            |                           |                                                            |                                                   |                                                          |
| Mean (standard deviation)             | 0.2 (0.6)                 | 0.7 (1.3)                                                  | 0.5 (1.0)                                         | 1.0 (1.3)                                                |
| 0                                     | 2,003,257 (89%)           | 165,823 (64%)                                              | 487,550 (71%)                                     | 102,790 (46%)                                            |
| 1 or 2                                | 221,370 (10%)             | 74,805 (29%)                                               | 174,287 (25%)                                     | 99,830 (44%)                                             |
| 3 or 4                                | 24,554 (1%)               | 12,659 (5%)                                                | 21,574 (3%)                                       | 15,961 (7%)                                              |
| 5+                                    | 8,726 (< 1%)              | 6,685 (3%)                                                 | 8,182 (1%)                                        | 6,470 (3%)                                               |

**Table 4: Clinical Characteristics of Hospitalized COVID-19 Cases in CPRD Aurum-HES Linked Data, by High-Risk Definitions**

|                                       | All<br>(n =<br>13,165) | Meeting NHS<br>Highest Risk<br>Conditions<br>(n = 4,333) | Meeting<br>PANORAMIC<br>Criteria<br>(n = 11,011) | Meeting<br>UKHSA<br>Clinical<br>Risk<br>(n =<br>5,353) |
|---------------------------------------|------------------------|----------------------------------------------------------|--------------------------------------------------|--------------------------------------------------------|
| Hospitalized cases meeting definition | --                     | 33%                                                      | 84%                                              | 41%                                                    |
| Smoking status                        |                        |                                                          |                                                  |                                                        |
| Current smoker                        | 1,690<br>(13%)         | 655 (15%)                                                | 1,476 (13%)                                      | 840 (16%)                                              |
| Former smoker                         | 3,810<br>(29%)         | 1,574 (36%)                                              | 3,544 (32%)                                      | 2,070<br>(39%)                                         |
| Never smoked                          | 4,205<br>(32%)         | 1,362 (31%)                                              | 3,513 (32%)                                      | 1,746<br>(33%)                                         |
| Unknown                               | 3,460<br>(26%)         | 742 (17%)                                                | 2,478 (23%)                                      | 697 (13%)                                              |
| Body mass index (kg/m <sup>2</sup> )  |                        |                                                          |                                                  |                                                        |
| Mean (standard deviation)             | 31.9 (7.5)             | 31.4 (7.5)                                               | 31.7 (7.4)                                       | 31.4 (7.7)                                             |
| Underweight (< 18.5)                  | 96 (1%)                | 51 (1%)                                                  | 90 (1%)                                          | 70 (1%)                                                |
| Not overweight (18.5-24.9)            | 1,162 (9%)             | 509 (12%)                                                | 1,060 (10%)                                      | 729 (14%)                                              |
| Overweight (25.0-29.9)                | 2,390<br>(18%)         | 949 (22%)                                                | 2,161 (20%)                                      | 1,239<br>(23%)                                         |
| Obese (≥30.0)                         | 4,586<br>(35%)         | 1,662 (38%)                                              | 4,053 (37%)                                      | 2,231<br>(42%)                                         |
| Unknown                               | 4,931<br>(37%)         | 1,162 (27%)                                              | 3,647 (33%)                                      | 1,084<br>(20%)                                         |
| Charlson Comorbidity Index            |                        |                                                          |                                                  |                                                        |
| Mean (standard deviation)             | 1.0 (1.6)              | 1.9 (2.1)                                                | 1.2 (1.7)                                        | 2.0 (2.0)                                              |
| 0                                     | 7,128<br>(54%)         | 1,283 (30%)                                              | 5,158 (47%)                                      | 894 (17%)                                              |
| 1 or 2                                | 4,241<br>(32%)         | 1,833 (43%)                                              | 4,094 (37%)                                      | 2,927<br>(55%)                                         |
| 3 or 4                                | 1,161 (9%)             | 711 (16%)                                                | 1,129 (10%)                                      | 963 (18%)                                              |
| 5+                                    | 635 (5%)               | 506 (12%)                                                | 630 (6%)                                         | 569 (11%)                                              |



## REFERENCES

- 1 UK Government. England Summary | Coronavirus (COVID-19) in the UK. <https://coronavirus.data.gov.uk> (accessed 11 January 2023)
- 2 CDC. Risk for COVID-19 Infection, Hospitalization, and Death By Age Group. *Cent. Dis. Control Prev.* 2020. <https://www.cdc.gov/coronavirus/2019-ncov/covid-data/investigations-discovery/hospitalization-death-by-age.html> (accessed 11 January 2023)
- 3 NHS. Who is at high risk from coronavirus (COVID-19). *nhs.uk.* 2021. <https://www.nhs.uk/conditions/coronavirus-covid-19/people-at-higher-risk/who-is-at-high-risk-from-coronavirus/> (accessed 11 January 2023)
- 4 Herrett E, Gallagher AM, Bhaskaran K, *et al.* Data Resource Profile: Clinical Practice Research Datalink (CPRD). *Int J Epidemiol.* 2015;44:827–36.
- 5 Coronavirus test results now visible to GPs. NDRS. <https://digital.nhs.uk/news/2020/coronavirus-test-results-now-visible-to-gps> (accessed 15 February 2023)
- 6 COVID-19 vaccination record queries. NHS Digit. <https://digital.nhs.uk/coronavirus/vaccinations/data-flows-and-resolving-data-queries/covid-19-vaccination-record-queries> (accessed 15 February 2023)
- 7 Wolf A, Dedman D, Campbell J, *et al.* Data resource profile: Clinical Practice Research Datalink (CPRD) Aurum. *Int J Epidemiol.* 2019;48:1740–1740g.
- 8 Data highlights | CPRD. <https://www.cprd.com/data-highlights> (accessed 11 January 2023)
- 9 Population and household estimates, England and Wales: Census 2021 - Office for National Statistics. <https://www.ons.gov.uk/peoplepopulationandcommunity/populationandmigration/populationestimates/datasets/populationandhouseholdestimatesenglandandwalescensus2021> (accessed 31 January 2023)
- 10 CPRD. Feasibility counts for SARS-CoV-2-related codes in CPRD primary care data (May 2022). <https://cprd.com/sites/default/files/2022-05/SARS-CoV-2%20counts%20May2022.pdf>
- 11 The rollout of the COVID-19 vaccination programme in England - National Audit Office (NAO) report. *Natl. Audit Off. NAO.* 2022. <https://www.nao.org.uk/reports/the-roll-out-of-the-covid-19-vaccine-in-england/> (accessed 16 February 2023)
- 12 Coronavirus » JCVI announcement regarding AstraZeneca vaccine and next steps. <https://www.england.nhs.uk/coronavirus/documents/jcvi-announcement-regarding-astrazeneca-vaccine-and-next-steps/> (accessed 16 February 2023)

- 13 Coronavirus (COVID-19) vaccine. nhs.uk. 2022. <https://www.nhs.uk/conditions/coronavirus-covid-19/coronavirus-vaccination/coronavirus-vaccine/> (accessed 16 February 2023)
- 14 Defining the highest-risk clinical subgroups upon community infection with SARS-CoV-2 when considering the use of neutralising monoclonal antibodies (nMABs) and antiviral drugs: independent advisory group report. GOV.UK. <https://www.gov.uk/government/publications/higher-risk-patients-eligible-for-covid-19-treatments-independent-advisory-group-report/defining-the-highest-risk-clinical-subgroups-upon-community-infection-with-sars-cov-2-when-considering-the-use-of-neutralising-monoclonal-antibodies> (accessed 16 February 2023)
- 15 PANORAMIC Active GP Sites. Google My Maps. <https://www.google.com/maps/d/viewer?mid=1fV1C91Aj4XtRUg1jwPL0oMIDUM8br6mJ> (accessed 16 February 2023)
- 16 COVID-19: the green book, chapter 14a. GOV.UK. 2022. <https://www.gov.uk/government/publications/covid-19-the-green-book-chapter-14a> (accessed 16 February 2023)
- 17 Davidson J, Warren-Gash C. Clinical codelist - CPRD Aurum - chronic neurological disease. 2022. <https://datacompass.lshtm.ac.uk/id/eprint/2817/>
- 18 Davidson J, Warren-Gash C, Mcdonald H. Clinical codelist - CPRD Aurum - chronic respiratory disease. 2021. <https://datacompass.lshtm.ac.uk/id/eprint/2214/>
- 19 Davidson J, Warren-Gash C, Mcdonald H, *et al.* Clinical codelist - chronic kidney disease. 2021. <https://datacompass.lshtm.ac.uk/id/eprint/2406/>
- 20 Davidson J, Warren-Gash C, Mcdonald H. Clinical codelist - CPRD Aurum - Immunosuppressive conditions. 2021. <https://datacompass.lshtm.ac.uk/id/eprint/2234/>
- 21 Dedman D, Carreira H, Strongman H. Clinical codelist - Cancer. 2021. <https://datacompass.lshtm.ac.uk/id/eprint/2408/>
- 22 Muzambi R. Clinical codelist - Chronic Liver Disease ICD-10 codes. 2020. <https://datacompass.lshtm.ac.uk/id/eprint/2032/>
- 23 Harriet Forbes, London School of Hygiene & Tropical Medicine, London, United Kingdom. Clinical Code List - Moderate Immunosuppression OPCS Codes. <https://doi.org/10.17037/DATA.00001587>.
- 24 Cases in England | Coronavirus in the UK. 2023. <https://coronavirus.data.gov.uk/details/cases?areaType=nation&areaName=England> (accessed 31 January 2023)

- 1  
2  
3 25 Healthcare in England | Coronavirus in the UK. 2023.  
4 <https://coronavirus.data.gov.uk/details/healthcare?areaType=nation&areaName=England>  
5 (accessed 31 January 2023)  
6  
7  
8 26 Household total wealth in Great Britain - Office for National Statistics.  
9 [https://www.ons.gov.uk/peoplepopulationandcommunity/personalandhouseholdfinances/i](https://www.ons.gov.uk/peoplepopulationandcommunity/personalandhouseholdfinances/incomeandwealth/bulletins/totalwealthingreatbritain/april2018tomarch2020)  
10 [ncomeandwealth/bulletins/totalwealthingreatbritain/april2018tomarch2020](https://www.ons.gov.uk/peoplepopulationandcommunity/personalandhouseholdfinances/incomeandwealth/bulletins/totalwealthingreatbritain/april2018tomarch2020) (accessed 31  
11 January 2023)  
12  
13  
14 27 Public Health England. Disparities in the risk and outcomes of COVID-19.  
15  
16 28 Office for National Statistics. Coronavirus (COVID-19) case rates by socio-demographic  
17 characteristics, England: 1 September 2020 to 10 December 2021. Published Online First: 14  
18 February 2022.  
19  
20 29 Thygesen JH, Tomlinson C, Hollings S, *et al.* COVID-19 trajectories among 57 million adults in  
21 England: a cohort study using electronic health records. *Lancet Digit Health.* 2022;4:e542–  
22 57.  
23  
24  
25 30 Center for Medicare & Medicaid Services. Assessing the Completeness of Medicare Claims  
26 Data for Measuring COVID-19 Vaccine Administration.  
27  
28 31 Wiemken TL, McGrath LJ, Andersen KM, *et al.* Coronavirus Disease 2019 Severity and Risk of  
29 Subsequent Cardiovascular Events. *Clin Infect Dis.* 2022;ciac661.  
30  
31  
32 32 Polack FP, Thomas SJ, Kitchin N, *et al.* Safety and Efficacy of the BNT162b2 mRNA Covid-19  
33 Vaccine. *N Engl J Med.* 2020;383:2603–15.  
34  
35 33 Baden LR, El Sahly HM, Essink B, *et al.* Efficacy and Safety of the mRNA-1273 SARS-CoV-2  
36 Vaccine. *N Engl J Med.* 2021;384:403–16.  
37  
38  
39 34 Voysey M, Clemens SAC, Madhi SA, *et al.* Safety and efficacy of the ChAdOx1 nCoV-19  
40 vaccine (AZD1222) against SARS-CoV-2: an interim analysis of four randomised controlled  
41 trials in Brazil, South Africa, and the UK. *The Lancet.* 2021;397:99–111.  
42  
43  
44  
45  
46  
47  
48  
49  
50  
51  
52  
53  
54  
55  
56  
57  
58  
59  
60

1  
2  
3  
4  
5  
6  
7  
8  
9  
10  
11  
12  
13  
14  
15  
16  
17  
18  
19  
20  
21  
22  
23  
24  
25  
26  
27  
28  
29  
30  
31

The overall cohort contained 2,271,072 persons

n= 535,453 diagnosed with COVID in primary care from 1 August 2020 through 31 March 2021

n= 1,735,619 diagnosed with COVID in primary care from 1 April 2021 through 31 January 2022

522,288 (98%) not hospitalized

13,165 (2%) later hospitalized

Hospitalization data unavailable for this time period

ANDERSEN ET AL (2023)

PERSONS DIAGNOSED WITH COVID IN ENGLAND IN THE CPRD: A COHORT DESCRIPTION

**Table of Contents**

|                                                                                                                                                                                             |           |
|---------------------------------------------------------------------------------------------------------------------------------------------------------------------------------------------|-----------|
| <b>Supplemental file 1, Table 1: COVID Cohort Definition.....</b>                                                                                                                           | <b>2</b>  |
| <b>Supplemental file 1, Table 2: COVID Vaccination Definition .....</b>                                                                                                                     | <b>4</b>  |
| <b>Supplemental file 1, Table 3: Search Terms for NHS Highest Risk Definition.....</b>                                                                                                      | <b>6</b>  |
| <b>Supplemental file 1, Table 4: Search Terms for PANORAMIC Eligibility Criteria Definition .....</b>                                                                                       | <b>13</b> |
| <b>Supplemental file 1, Table 5: Search Terms for UK Health Security Agency Clinical Risk Group Definition .....</b>                                                                        | <b>19</b> |
| <b>Supplemental file 1, Table 6: Cohort Attrition.....</b>                                                                                                                                  | <b>27</b> |
| <b>Supplemental file 1, Figure 1: Date of Diagnosis for 2,271,072 COVID Cases in CPRD Aurum, By Care Setting, August 1, 2020 through January 31, 2022.....</b>                              | <b>28</b> |
| <b>Supplemental file 1, Figure 2: Date of Diagnosis for 2,257,907 Primary Care COVID Cases in CPRD Aurum, August 1, 2020 through January 31, 2022.....</b>                                  | <b>29</b> |
| <b>Supplemental file 1, Figure 3: Date of Primary Care Recorded Diagnosis in CPRD Aurum-HES Linked Data for 13,165 Hospitalised COVID Cases, August 1, 2020 through March 31, 2021.....</b> | <b>30</b> |
| <b>Supplemental file 1, Table 7: Reference National Case Counts and Census Distributions for England .....</b>                                                                              | <b>31</b> |
| <b>Supplemental file 1, Table 8: Regional Distribution of CPRD COVID cohorts, CPRD Practices, COVID Cases and Population of England.....</b>                                                | <b>33</b> |
| <b>Supplemental file 1, Table 9: Characteristics of Primary Care COVID Cases in CPRD Aurum, by High Risk Definitions .....</b>                                                              | <b>34</b> |
| <b>Supplemental file 1, Table 10: Characteristics of Hospitalized COVID Cases in CPRD Aurum-HES Linked Data, by High Risk Definitions.....</b>                                              | <b>35</b> |

ANDERSEN ET AL (2023)

PERSONS DIAGNOSED WITH COVID IN ENGLAND IN THE CPRD: A COHORT DESCRIPTION

**Supplemental file 1, Table 1: COVID Cohort Definition**

| Medcode           | Term                                                                                                                                |
|-------------------|-------------------------------------------------------------------------------------------------------------------------------------|
| 6874141000006113  | SARS-CoV                                                                                                                            |
| 6604671000006111  | SARS-CoV infection                                                                                                                  |
| 13053051000006117 | 2019-nCoV (novel coronavirus) antigen detection result positive                                                                     |
| 12990741000006116 | 2019-nCoV (novel coronavirus) detected                                                                                              |
| 13483601000006110 | 2019-nCoV (novel coronavirus) detection result positive at the limit of detection                                                   |
| 13483161000006118 | 2019-nCoV (novel coronavirus) ribonucleic acid detected                                                                             |
| 14168601000006119 | Acute COVID-19                                                                                                                      |
| 13486461000006118 | Acute COVID-19 infection                                                                                                            |
| 14168611000006116 | Acute disease caused by Severe acute respiratory syndrome coronavirus 2                                                             |
| 13486471000006113 | Acute disease caused by severe acute respiratory syndrome coronavirus 2 infection                                                   |
| 13486571000006112 | Asymptomatic COVID-19                                                                                                               |
| 13486561000006117 | Asymptomatic SARS-CoV-2 (severe acute respiratory syndrome coronavirus 2) infection                                                 |
| 12802201000006117 | Confirmed 2019-nCoV (novel coronavirus) infection                                                                                   |
| 13012431000006117 | COVID-19                                                                                                                            |
| 13483031000006114 | COVID-19                                                                                                                            |
| 13012441000006110 | COVID-19 caused by SARS-CoV-2 (severe acute respiratory syndrome coronavirus 2)                                                     |
| 13002281000006117 | COVID-19 confirmed by laboratory test                                                                                               |
| 13002311000006115 | COVID-19 confirmed clinically                                                                                                       |
| 13002291000006119 | COVID-19 confirmed using clinical diagnostic criteria                                                                               |
| 13483951000006118 | COVID-19 detected                                                                                                                   |
| 12990531000006116 | Detection of 2019-nCoV (novel coronavirus) using polymerase chain reaction technique                                                |
| 13485771000006110 | Detection of COVID-19                                                                                                               |
| 13485471000006115 | Detection of ribonucleic acid of 2019 novel coronavirus in nasopharyngeal swab                                                      |
| 13485711000006118 | Detection of ribonucleic acid of COVID- 19 using polymerase chain reaction                                                          |
| 13485421000006116 | Detection of ribonucleic acid of Severe acute respiratory syndrome coronavirus 2                                                    |
| 13485461000006110 | Detection of RNA (ribonucleic acid) of SARS-CoV-2 (severe acute respiratory syndrome coronavirus 2) in nasopharyngeal swab          |
| 13485521000006117 | Detection of RNA (ribonucleic acid) of SARS-CoV-2 (severe acute respiratory syndrome coronavirus 2) in oropharyngeal swab           |
| 13485581000006118 | Detection of RNA (ribonucleic acid) of SARS-CoV-2 (severe acute respiratory syndrome coronavirus 2) in sputum                       |
| 13485701000006116 | Detection of RNA (ribonucleic acid) of SARS-CoV-2 (severe acute respiratory syndrome coronavirus 2) using polymerase chain reaction |
| 13485751000006117 | Detection of SARS-CoV-2 (severe acute respiratory syndrome coronavirus 2)                                                           |
| 13485381000006114 | Detection of SARS-CoV-2 (severe acute respiratory syndrome coronavirus 2) antigen                                                   |
| 13012231000006116 | Detection of SARS-CoV-2 (severe acute respiratory syndrome coronavirus 2) using polymerase chain reaction technique                 |

ANDERSEN ET AL (2023)

## PERSONS DIAGNOSED WITH COVID IN ENGLAND IN THE CPRD: A COHORT DESCRIPTION

|                   |                                                                                                                                         |
|-------------------|-----------------------------------------------------------------------------------------------------------------------------------------|
| 13483041000006116 | Disease caused by 2019 novel coronavirus                                                                                                |
| 13483051000006119 | Disease caused by 2019-nCoV                                                                                                             |
| 12991131000006119 | Disease caused by 2019-nCoV (novel coronavirus)                                                                                         |
| 13483061000006117 | Disease caused by Severe acute respiratory syndrome coronavirus 2                                                                       |
| 12991141000006112 | Disease caused by Wuhan 2019-nCoV (novel coronavirus)                                                                                   |
| 13053041000006119 | SARS-CoV-2 (severe acute respiratory syndrome coronavirus 2) antigen detection result positive                                          |
| 13012301000006116 | SARS-CoV-2 (severe acute respiratory syndrome coronavirus 2) detected                                                                   |
| 13052351000006112 | SARS-CoV-2 (severe acute respiratory syndrome coronavirus 2) RNA (ribonucleic acid) detection result positive                           |
| 13483141000006117 | SARS-CoV-2 (severe acute respiratory syndrome coronavirus 2) RNA (ribonucleic acid) detection result positive                           |
| 13483591000006119 | SARS-CoV-2 (severe acute respiratory syndrome coronavirus 2) RNA (ribonucleic acid) detection result positive at the limit of detection |
| 13483151000006115 | Severe acute respiratory syndrome coronavirus 2 ribonucleic acid detected                                                               |
| 12990751000006119 | Wuhan 2019-nCoV (novel coronavirus) detected                                                                                            |
| 13002301000006118 | Probable COVID-19 confirmed using clinical diagnostic criteria                                                                          |
| 13483611000006113 | SARS (severe acute respiratory syndrome) coronavirus 2 RNA                                                                              |
| 13484481000006118 | SARS-CoV-2 - severe acute respiratory syndrome coronavirus 2                                                                            |
| 13039281000006117 | SARS-CoV-2 (severe acute respiratory syndrome coronavirus 2) detection result positive                                                  |
| 13052381000006116 | SARS-CoV-2 (severe acute respiratory syndrome coronavirus 2) RNA (ribonucleic acid) qualitative existence in specimen                   |
| 13483941000006115 | Severe acute respiratory syndrome coronavirus 2 detected                                                                                |

Note: "SARS-CoV" or "SARS-CoV infection" may refer to the SARS illness of 2003. We allowed these terms, given the novelty of SARS-CoV-2 and potential for erroneous use of SARS-CoV terms, but required them to be used during the time period of COVID (August 2020 onwards).



ANDERSEN ET AL (2023)

PERSONS DIAGNOSED WITH COVID IN ENGLAND IN THE CPRD: A COHORT DESCRIPTION

**Supplemental file 1, Table 2: COVID Vaccination Definition**

| <b>Product code</b> | <b>Term</b>                                                                                                                                                      |
|---------------------|------------------------------------------------------------------------------------------------------------------------------------------------------------------|
| 13739441000033113   | COVID-19 Vaccine AstraZeneca (ChAdOx1 S [recombinant]) 5x10,000,000,000 viral particles/0.5ml dose suspension for injection multidose vials (AstraZeneca UK Ltd) |
| 13750541000033115   | COVID-19 Vaccine Janssen (Ad26.COVS-S [recombinant]) 0.5ml dose suspension for injection multidose vials (Janssen-Cilag Ltd)                                     |
| 13860541000033111   | COVID-19 Vaccine Medicago (CoVLP) 3.75micrograms/0.5ml dose emulsion for injection multidose vials (Medicago Inc)                                                |
| 13790341000033117   | COVID-19 Vaccine Novavax (adjuvanted) 5micrograms/0.5ml dose suspension for injection multidose vials (Baxter Oncology GmbH)                                     |
| 13778941000033110   | COVID-19 Vaccine Valneva (inactivated adjuvanted whole virus) 40antigen units/0.5ml dose suspension for injection multidose vials (Valneva UK Ltd)               |
| 13739541000033114   | Comirnaty COVID-19 mRNA Vaccine 30micrograms/0.3ml dose concentrate for dispersion for injection multidose vials (Pfizer Ltd)                                    |
| 13764941000033111   | Spikevax COVID-19 mRNA (nucleoside modified) Vaccine 0.1mg/0.5ml dose dispersion for injection multidose vials (Moderna, Inc)                                    |
| <b>Medical code</b> | <b>Term</b>                                                                                                                                                      |
| 12990501000006112   | 2019-nCoV (novel coronavirus) vaccination                                                                                                                        |
| 13012221000006119   | SARS-CoV-2 (severe acute respiratory syndrome coronavirus 2) vaccination                                                                                         |
| 13482981000006117   | SARS-CoV-2 (severe acute respiratory syndrome coronavirus 2) vaccination                                                                                         |
| 13482991000006119   | 2019 novel coronavirus vaccination                                                                                                                               |
| 13483001000006118   | Severe acute respiratory syndrome coronavirus 2 vaccination                                                                                                      |
| 13483011000006115   | COVID-19 vaccination                                                                                                                                             |
| 13483021000006111   | 2019-nCoV (novel coronavirus) vaccination                                                                                                                        |
| 13483211000006110   | Immunisation course to achieve immunity against SARS-CoV-2 (severe acute respiratory syndrome coronavirus 2)                                                     |
| 13483221000006119   | Immunisation course to achieve immunity against 2019-nCoV (novel coronavirus)                                                                                    |
| 13483231000006116   | Administration of first dose of SARS- CoV-2 (severe acute respiratory syndrome coronavirus 2) vaccine                                                            |
| 13483241000006114   | Administration of first dose of 2019- nCoV (novel coronavirus) vaccine                                                                                           |
| 13483251000006111   | Administration of second dose of SARS- CoV-2 (severe acute respiratory syndrome coronavirus 2) vaccine                                                           |
| 13483261000006113   | Administration of second dose of 2019- nCoV (novel coronavirus) vaccine                                                                                          |
| 13483531000006118   | SARS-CoV-2 (severe acute respiratory syndrome coronavirus 2) immunisation course started                                                                         |
| 13483541000006111   | 2019-nCoV (novel coronavirus) immunisation course started                                                                                                        |
| 14169101000006118   | COVID-19 mRNA vaccine                                                                                                                                            |
| 14170191000006111   | SARS-CoV-2 antigen vaccine or SARS- CoV-2 mRNA vaccine                                                                                                           |
| 14170301000006118   | Administration of first dose of SARS- CoV-2 mRNA vaccine                                                                                                         |
| 14170341000006116   | First COVID-19 mRNA vaccination                                                                                                                                  |
| 14170411000006113   | Administration of second dose of SARS- CoV-2 mRNA vaccine                                                                                                        |
| 14170431000006119   | Second COVID-19 mRNA vaccination                                                                                                                                 |



ANDERSEN ET AL (2023)

## PERSONS DIAGNOSED WITH COVID IN ENGLAND IN THE CPRD: A COHORT DESCRIPTION

---

|                   |                                                                                                                |
|-------------------|----------------------------------------------------------------------------------------------------------------|
| 14233631000006113 | Immunisation course to maintain protection against SARS-CoV-2 (severe acute respiratory syndrome coronavirus 2 |
| 14233641000006115 | Booster course to maintain protection against SARS-CoV-2 (severe acute respiratory syndrome coronavirus 2)     |
| 14233671000006111 | SARS-CoV-2 (severe acute respiratory syndrome coronavirus 2) immunisation course completed                     |
| 14233841000006119 | SARS-CoV-2 (severe acute respiratory syndrome coronavirus 2) protection maintenance course started             |
| 14233871000006110 | SARS-CoV-2 (severe acute respiratory syndrome coronavirus 2) protection maintenance course completed           |
| 14233881000006113 | Severe acute respiratory syndrome coronavirus 2 protection maintenance course done                             |
| 14283421000006117 | Administration of fourth dose of SARS- CoV-2 (severe acute respiratory syndrome coronavirus 2) vaccine         |
| 14283481000006118 | Administration of fifth dose of SARS- CoV-2 (severe acute respiratory syndrome coronavirus 2) vaccine          |
| 14283541000006113 | Administration of third dose of SARS- CoV-2 (severe acute respiratory syndrome coronavirus 2) vaccine          |

---

ANDERSEN ET AL (2023)

PERSONS DIAGNOSED WITH COVID IN ENGLAND IN THE CPRD: A COHORT DESCRIPTION

**Supplemental file 1, Table 3: Search Terms for NHS Highest Risk Definition**

Note: this list reflects the report “Defining the highest-risk clinical subgroups upon community infection with SARS-CoV-2 when considering the use of neutralising monoclonal antibodies (nMABs) and antiviral drugs: independent advisory group report” version published on May 30, 2022.

| Classification as defined by England’s Deputy Chief Medical Officer | Concept as operationalized by Andersen et al                                                                                                                                                                                                                   | Search term                                                                                                                                                                                                                                                                                                                                                                                           |
|---------------------------------------------------------------------|----------------------------------------------------------------------------------------------------------------------------------------------------------------------------------------------------------------------------------------------------------------|-------------------------------------------------------------------------------------------------------------------------------------------------------------------------------------------------------------------------------------------------------------------------------------------------------------------------------------------------------------------------------------------------------|
| Down’s syndrome and other genetic disorders                         | Down’s syndrome or other chromosomal disorder known to affect immune competence                                                                                                                                                                                | *down*<br>*trisom*<br>*mongol*                                                                                                                                                                                                                                                                                                                                                                        |
| Solid cancer                                                        | We identified a code list “Clinical codelist – Cancer”, which did not separate solid from liquid (blood) cancers. We systematically excluded blood cancers from the list by excluding the following terms, and had the resulting list reviewed by a clinician: | leuk<br>Lymphoma<br>lymphatic<br>Lymphoid<br>lymphosarc<br>myeloma<br>myeloid<br>myeloscler<br>myelofib<br>myelosis<br>myeloprol<br>myelody<br>walden<br>anem<br>anaem<br>raeb<br>nodular scler<br>mycosis<br>sezary<br>zary<br>hodgk<br>heavy<br>plasma<br>marrow<br>haemato<br>hemota<br>erythraem<br>erythrem<br>heilmeyer<br>lymphadenopathy<br>polycyt<br>erythrocyt<br>erythrodys<br>thrombocyt |

ANDERSEN ET AL (2023)

PERSONS DIAGNOSED WITH COVID IN ENGLAND IN THE CPRD: A COHORT DESCRIPTION

|                                                                                |                                                       |                       |
|--------------------------------------------------------------------------------|-------------------------------------------------------|-----------------------|
|                                                                                |                                                       | franklin              |
|                                                                                |                                                       | immunoprolif          |
|                                                                                |                                                       | reticulosarc          |
|                                                                                |                                                       | chloroma              |
|                                                                                |                                                       | macroglob             |
|                                                                                |                                                       | reticulosis           |
|                                                                                |                                                       | kahler                |
|                                                                                |                                                       | burkitt               |
|                                                                                |                                                       | di guglielmo          |
|                                                                                |                                                       | langer                |
|                                                                                |                                                       | histiocytosis         |
|                                                                                |                                                       | germinoblast          |
|                                                                                |                                                       | letterer              |
|                                                                                |                                                       | FAB                   |
|                                                                                |                                                       | Mastocytosis          |
| Haematological diseases and recipients of haematological stem cell transplants | Amyloidosis                                           | *amyloid*             |
|                                                                                | Graft Versus Host disease                             | *GVHD*                |
|                                                                                |                                                       | *Graft V*             |
|                                                                                |                                                       | *Graft-V*             |
|                                                                                |                                                       | *reject*              |
|                                                                                |                                                       | *trans*               |
|                                                                                |                                                       | *fail* *trans*        |
|                                                                                | Myelodysplastic syndrome                              | *MDS*                 |
|                                                                                |                                                       | *myelod*              |
|                                                                                |                                                       | *preleuk*             |
|                                                                                |                                                       | *smouldering leuk*    |
|                                                                                | Chronic myelomonocytic leukaemia                      | *CMML*                |
|                                                                                |                                                       | *chronic myelom*      |
|                                                                                | Sickle cell disease                                   | *sickl*               |
|                                                                                |                                                       | *SCD*                 |
|                                                                                | Myeloma                                               | *myelom*              |
|                                                                                |                                                       | *kahler*              |
|                                                                                | Myelofibrosis                                         | *myelof*              |
|                                                                                |                                                       | *PMF*                 |
|                                                                                |                                                       | *idiopath* *fibrosis* |
|                                                                                |                                                       | *myelod metaplasia*   |
|                                                                                | Rare inherited anemia                                 | *anaem*               |
|                                                                                |                                                       | *anem*                |
|                                                                                | Chronic lymphocytic leukaemia and Follicular lymphoma | *lymphoma*            |
|                                                                                |                                                       | *NHL*                 |
|                                                                                |                                                       | * hodgk*              |
|                                                                                |                                                       | *nodular scler*       |
|                                                                                |                                                       | *mycosis fung*        |
|                                                                                |                                                       | *sezary*              |
|                                                                                |                                                       | *walden*              |
|                                                                                | Thalassaemia                                          | *thalass*             |
|                                                                                |                                                       | *cooley*              |
|                                                                                |                                                       | *mediterr*            |
|                                                                                |                                                       | *constant spring*     |
|                                                                                |                                                       | *haemoglobin h*       |

ANDERSEN ET AL (2023)

PERSONS DIAGNOSED WITH COVID IN ENGLAND IN THE CPRD: A COHORT DESCRIPTION

|               |                                                                                               |                         |
|---------------|-----------------------------------------------------------------------------------------------|-------------------------|
|               |                                                                                               | *hemoglobin h*          |
|               |                                                                                               | *hb h*                  |
|               |                                                                                               | *haemoglobin bart*      |
|               |                                                                                               | *hemoglobin bart*       |
|               |                                                                                               | *hb bart*               |
|               | Systemic anti-cancer treatments:                                                              |                         |
|               | Davidson, J, Warren-Gash, C and Mcdonald, H (2021). Clinical codelist - CPRD                  |                         |
|               | Aurum - Immunosuppressive conditions. [Data Collection]. London School of                     |                         |
|               | Hygiene & Tropical Medicine, London, United Kingdom.                                          |                         |
|               | <a href="https://doi.org/10.17037/DATA.00002234">https://doi.org/10.17037/DATA.00002234</a> . |                         |
| Renal disease | Davidson, J, Warren-Gash, C, Mcdonald, H, Evans, D and Clay, S (2021). Clinical               |                         |
|               | codelist - chronic kidney disease. [Data Collection]. London School of Hygiene &              |                         |
|               | Tropical Medicine, London, United Kingdom.                                                    |                         |
|               | <a href="https://doi.org/10.17037/DATA.00002406">https://doi.org/10.17037/DATA.00002406</a> . |                         |
|               | CKD, stage 4 or 5                                                                             | *CKD*                   |
|               |                                                                                               | *renal* *disease*       |
|               |                                                                                               | *renal* *failure*       |
|               |                                                                                               | *renal* *insufficiency* |
|               |                                                                                               | *renal* *disorder*      |
|               |                                                                                               | *kidney* *disease*      |
|               |                                                                                               | *kidney* *disorder*     |
|               |                                                                                               | *kidney* *failure*      |
|               |                                                                                               | *eGFR*                  |
|               |                                                                                               | *estimated*             |
|               |                                                                                               | *glomerular*            |
|               |                                                                                               | *filtration* *rate*     |
|               |                                                                                               | *disease* *renal*       |
|               |                                                                                               | *failure* *renal*       |
|               |                                                                                               | *insufficiency* *renal* |
|               |                                                                                               | *disorder* *renal*      |
|               |                                                                                               | *disease* *kidney*      |
|               |                                                                                               | *disorder* *kidney*     |
|               |                                                                                               | *failure* *kidney*      |
| Liver disease | Cirrhosis                                                                                     | *cirrhos*               |
| Solid organ   | Solid organ transplant                                                                        | *transplant*            |
| transplant    |                                                                                               | *organ* *recipient*     |
| recipients    |                                                                                               | *heart* *recipient*     |
|               |                                                                                               | *lung* *recipient*      |
|               |                                                                                               | *pancreas*              |
|               |                                                                                               | *recipient*             |
|               |                                                                                               | *kidney* *recipient*    |
|               |                                                                                               | *intestine* *recipient* |
|               |                                                                                               | *gland* *recipient*     |
|               |                                                                                               | *stomach* *recipient*   |
|               |                                                                                               | *spleen* *recipient*    |
|               |                                                                                               | *liver* *recipient*     |
|               |                                                                                               | *bladder* *recipient*   |
| Immune-       | People who have received a B-cell depleting therapy in the                                    | Obinutuzumab            |
| mediated      | last 12 months                                                                                | Ocrelizumab             |

ANDERSEN ET AL (2023)

## PERSONS DIAGNOSED WITH COVID IN ENGLAND IN THE CPRD: A COHORT DESCRIPTION

|                                  |                                                                                                                                                                               |                                                                                                                                                                                                                                          |
|----------------------------------|-------------------------------------------------------------------------------------------------------------------------------------------------------------------------------|------------------------------------------------------------------------------------------------------------------------------------------------------------------------------------------------------------------------------------------|
| inflammatory disorders           | People who have been treated with cyclophosphamide (IV or oral) in the 6 months prior                                                                                         | Ofatumumab<br>Rituximab<br>Cyclophosphamide                                                                                                                                                                                              |
|                                  | People who are on biologics or small molecule JAK-inhibitors (except anti-CD20 depleting monoclonal antibodies) or who have received these therapies within the last 6 months | Abatacept<br>Adalimumab<br>Baracitinib<br>Belimumab<br>Certolizumab pegol<br>Etanercept<br>Golimumab<br>Infliximab<br>Ixekizumab<br>Sarilumab<br>Secukinumab<br>Tocilizumab<br>Tofacitinib<br>Upadacitinib<br>Ustekinumab<br>Vedolizumab |
|                                  | People who are on corticosteroids (equivalent to greater than 10mg per day of prednisolone) for at least the 28 days prior                                                    | Betamethasone<br>Cortisone<br>Dexamethasone<br>Hydrocortisone<br>Methylprednisolone<br>Prednisolone<br>Prednisone<br>Triamcinolone                                                                                                       |
|                                  | People who are on current treatment with: methotrexate (for interstitial lung disease) and/or ciclosporin                                                                     | Mycophenolate<br>Tacrolimus, oral<br>Azathioprine with mercaptopurine<br>Methotrexate<br>Ciclosporin                                                                                                                                     |
| Giant cell arteritis             |                                                                                                                                                                               | *giant cell arterit*                                                                                                                                                                                                                     |
| Sarcoidosis                      |                                                                                                                                                                               | *sarcoid*                                                                                                                                                                                                                                |
|                                  |                                                                                                                                                                               | *Besnier*                                                                                                                                                                                                                                |
| Psoriatic arthritis or psoriasis |                                                                                                                                                                               | *arthr*                                                                                                                                                                                                                                  |
|                                  |                                                                                                                                                                               | *psoria*                                                                                                                                                                                                                                 |
| Autoimmune hepatitis             |                                                                                                                                                                               | *autoimmune hep*                                                                                                                                                                                                                         |
|                                  |                                                                                                                                                                               | *hepatitis auto*                                                                                                                                                                                                                         |
|                                  |                                                                                                                                                                               | *AIH*                                                                                                                                                                                                                                    |
|                                  |                                                                                                                                                                               | *lupoid hep*                                                                                                                                                                                                                             |
|                                  |                                                                                                                                                                               | *autoimmune chron*                                                                                                                                                                                                                       |
|                                  |                                                                                                                                                                               | *autoimmune act*                                                                                                                                                                                                                         |
|                                  |                                                                                                                                                                               | *autoimmune agg*                                                                                                                                                                                                                         |
| Crohn's disease                  |                                                                                                                                                                               | *crohn*                                                                                                                                                                                                                                  |
|                                  |                                                                                                                                                                               | *regional ent*                                                                                                                                                                                                                           |
|                                  |                                                                                                                                                                               | *granulomatous ent*                                                                                                                                                                                                                      |
|                                  |                                                                                                                                                                               | *ileocoli*                                                                                                                                                                                                                               |
|                                  |                                                                                                                                                                               | *Jejunioileitis*                                                                                                                                                                                                                         |

ANDERSEN ET AL (2023)

PERSONS DIAGNOSED WITH COVID IN ENGLAND IN THE CPRD: A COHORT DESCRIPTION

|        |                              |                          |
|--------|------------------------------|--------------------------|
|        |                              | *granulomatous col*      |
|        | Type I diabetes              | *type 1 dia*             |
|        |                              | *type I dia*             |
|        |                              | *diabetes mellitus       |
|        |                              | juv*                     |
|        |                              | *diabetes mellitus       |
|        |                              | *insulin dep*            |
|        |                              | *juvenile onset dia*     |
|        |                              | *juvenile-onset dia*     |
|        |                              | *juvenile-onset          |
|        |                              | *diabetes mellitus       |
|        |                              | type 1*                  |
|        |                              | *diabetes mellitus       |
|        |                              | type I*                  |
|        |                              | *diabetes type 1*        |
|        |                              | *diabetes type I*        |
|        | Ankylosing spondylitis       | *ankylosing*             |
|        |                              | *Bekhterev*              |
|        |                              | *Rheumatoid arthritis    |
|        |                              | of spine*                |
|        |                              | *spine rheum*            |
|        |                              | *rheumatoid arthritis    |
|        |                              | of*                      |
|        |                              | *rheumatoid* *spine*     |
|        | Rheumatoid arthritis         | *rheumatoid*             |
|        |                              | *felty*                  |
|        |                              | *caplan*                 |
|        |                              | *rheum.*                 |
|        |                              | *atrophic art*           |
|        |                              | *chronic rheumatic       |
|        |                              | art*                     |
|        |                              | *prolif* *art*           |
|        | Systemic lupus erythematosus | *lupus*                  |
|        | Scleroderma                  | *scleroderma*            |
|        |                              | *systemic sclero*        |
|        |                              | *crest s*                |
|        |                              | *morphea*                |
|        |                              | *morphoea*               |
|        | Ulcerative colitis           | *ulcerative* *colitis*   |
|        |                              | *ulcerative* *proctitis* |
|        |                              | *rectosigmoiditis*       |
|        |                              | *inflam* *polyps*        |
|        |                              | *left* *colitis*         |
|        |                              | *ulcerative* *panc*      |
|        |                              | *extensive* *colitis*    |
|        |                              | *proctosigmoiditis*      |
|        |                              | *backwash* *ileitis*     |
|        |                              | *distal* *colitis*       |
|        |                              | *inflam* *bowel*         |
| Immune | Immunodeficiencies           | *cvid*                   |

ANDERSEN ET AL (2023)

PERSONS DIAGNOSED WITH COVID IN ENGLAND IN THE CPRD: A COHORT DESCRIPTION

|                                                                               |                                                                                                                                   |                                                                                                                                                                                                                                                                                                                                                                                                                                                                                                                                                                                              |
|-------------------------------------------------------------------------------|-----------------------------------------------------------------------------------------------------------------------------------|----------------------------------------------------------------------------------------------------------------------------------------------------------------------------------------------------------------------------------------------------------------------------------------------------------------------------------------------------------------------------------------------------------------------------------------------------------------------------------------------------------------------------------------------------------------------------------------------|
| deficiencies                                                                  |                                                                                                                                   | <ul style="list-style-type: none"> <li>*common*</li> <li>*immunodeficienc*</li> <li>*antibody* *deficienc*</li> <li>Hyper* *igm*</li> <li>*higm*</li> <li>*good* *syndrom*</li> <li>*thymom* *deficienc*</li> <li>*severe* *combin*</li> <li>*immunodeficienc*</li> <li>*SCID*</li> <li>*aps-1*</li> <li>*pas-2*</li> <li>*polygland*</li> <li>*autoimmune*</li> <li>*autoimmune*</li> <li>*polygland*</li> <li>*polyendocrinopath*</li> <li>*ectodermal</li> <li>dystroph*</li> <li>*apeced*</li> <li>*ifn* *signal*</li> <li>*interferon* *signal*</li> <li>*gammaglobulinaemi*</li> </ul> |
| HIV/AIDS                                                                      | HIV                                                                                                                               | <ul style="list-style-type: none"> <li>*HIV*</li> <li>*immunodeficiency</li> <li>vir*</li> </ul>                                                                                                                                                                                                                                                                                                                                                                                                                                                                                             |
| Rare neurological and severe complex life-limiting neurodisability conditions | <ul style="list-style-type: none"> <li>Multiple sclerosis</li> <li>Motor neurone disease</li> <li>Huntington's disease</li> </ul> | <ul style="list-style-type: none"> <li>*Multiple sclerosis*</li> <li>*sclerosis multiple*</li> <li>*encephalomyelit*</li> <li>*disseminat*</li> <li>* ms*</li> <li>*motor* *neurone*</li> <li>disease*</li> <li>*kennedy*</li> <li>*amyotrophic*</li> <li>*lateral **sclerosis*</li> <li>*ALS*</li> <li>*primary* *lateral*</li> <li>*sclerosis*</li> <li>*progressive*</li> <li>*bulbar* *palsy*</li> <li>*progressive*</li> <li>*spinal* muscular*</li> <li>*atrophy*</li> <li>*huntington*</li> <li>*huntington*</li> <li>*disease*</li> <li>*Huntington*</li> <li>*chorea*</li> </ul>    |

ANDERSEN ET AL (2023)  
PERSONS DIAGNOSED WITH COVID IN ENGLAND IN THE CPRD: A COHORT DESCRIPTION

---

Myasthenia gravis

\*myasthenia\* \*gravis\*

---

For peer review only



ANDERSEN ET AL (2023)

PERSONS DIAGNOSED WITH COVID IN ENGLAND IN THE CPRD: A COHORT DESCRIPTION

**Supplemental file 1, Table 4: Search Terms for PANORAMIC Eligibility Criteria Definition**

| Inclusion criteria as in PANORAMIC protocol                                                                                                                                              | Concept as operationalized by Andersen et al                                                                                                                                                                                                                                                                                                                                                                                                                                                                                                                                                                                                                                                                    | Search term                                                                                                                                                                                                                                                                                                                                                                                                                                                                                                                                                                                                                                                                                                                                                                                                                                                                                                         |
|------------------------------------------------------------------------------------------------------------------------------------------------------------------------------------------|-----------------------------------------------------------------------------------------------------------------------------------------------------------------------------------------------------------------------------------------------------------------------------------------------------------------------------------------------------------------------------------------------------------------------------------------------------------------------------------------------------------------------------------------------------------------------------------------------------------------------------------------------------------------------------------------------------------------|---------------------------------------------------------------------------------------------------------------------------------------------------------------------------------------------------------------------------------------------------------------------------------------------------------------------------------------------------------------------------------------------------------------------------------------------------------------------------------------------------------------------------------------------------------------------------------------------------------------------------------------------------------------------------------------------------------------------------------------------------------------------------------------------------------------------------------------------------------------------------------------------------------------------|
| Chronic respiratory disease (including chronic obstructive pulmonary disease (COPD), cystic fibrosis and asthma requiring at least daily use of preventative and/or reliever medication) | Davidson, J, Warren-Gash, C and McDonald, H (2021). Clinical codelist - CPRD Aurum - chronic respiratory disease. [Data Collection]. London School of Hygiene & Tropical Medicine, London, United Kingdom.<br><a href="https://doi.org/10.17037/DATA.00002214">https://doi.org/10.17037/DATA.00002214</a> .<br><br>We also included product codes for asthma medications, using all drugs classified by the British National Formulary under the following categories:<br>Short-acting beta agonists (SABA)<br>Short-acting muscarinic antagonists (SAMA)<br>Inhaled corticosteroids (ICS)<br>Long-acting beta agonists (LABA)<br>Long-acting muscarinic antagonist (LAMA)<br>Methylxanthine<br>PDE-4 inhibitor |                                                                                                                                                                                                                                                                                                                                                                                                                                                                                                                                                                                                                                                                                                                                                                                                                                                                                                                     |
| Chronic heart or vascular disease                                                                                                                                                        | Atherosclerosis/Arteriosclerosis<br>Stenosis<br><br>Cerebrovascular disease (not including stroke/TIA - included in PANORAMIC)<br>Pulmonary embolism<br>Systolic/diastolic dysfunction<br>Chronic arrhythmias<br>Myocardial infarction<br>Hypertension<br><br>Venous thromboembolism/DVT<br><br>Heart failure<br>Atrial fibrillation<br>Ischaemic and peripheral heart disease<br><br>Congenital heart/cardiac disease<br>Various                                                                                                                                                                                                                                                                               | *athero*;*arterioscl*;*ASVD*;*obliter*;*endart*<br>*steno* *aort*;*steno* *vasc*;*steno*<br>*heart*;*steno* *card*;*strict* *aort*;*strict*<br>*vasc*;*heart* *stict*;*card* *strict*;<br>*cerebro* *disea*;*subarac* *haem*;*vasc*<br>*demen*;*arterio* *demen*;*infar* *demen*<br><br>*pul* *embo*;<br>*syst* *dys*;*dia* *dys*;*dys* *syst*<br>*AFL*;*atria* *flut*;*arrhyth*;*dysrhy*<br>*myo* *infarc*;*heart* *att*;* AMI<br>*hyperten*;*high* *blood**pres*;<br>bp*;*bp*;*bp*HBP*;*HTN*<br>*VTE*;*thrombo*;*DVT*;*blood* clot*;*pulmon*<br>*embolis*;*pe*;*pe*;*pe*;<br>*CCF*;*CHF*;*hear* *fail*;*card* *fail*;<br>* fibrilla*;* fibrilla*;* af*;*af*;*Afib*<br>*hear* *diseas*;<br>*artero* *diseas*;<br>*vasc* *diseas*;<br>*CAD*;<br>*ihd*;<br>*myocard* *isch*;<br>*chd*<br>*congen* *hear*;*congen* *card*;*CHD*<br>*Aneurysm*<br>*May-Thurner*<br>*Thoracic* *outlet*<br>*Fibromuscular*<br>*Klippel* |

ANDERSEN ET AL (2023)

PERSONS DIAGNOSED WITH COVID IN ENGLAND IN THE CPRD: A COHORT DESCRIPTION

|  |  |                                              |
|--|--|----------------------------------------------|
|  |  | *lymphedema*                                 |
|  |  | *hypoten*                                    |
|  |  | *Telangiect*                                 |
|  |  | *Vasculit*                                   |
|  |  | *body* *tumour*                              |
|  |  | *Claudication*                               |
|  |  | *Varicose*                                   |
|  |  | *Venous* *insufficiency*                     |
|  |  | *artery* *dissection*                        |
|  |  |                                              |
|  |  | *CKD*                                        |
|  |  | *renal* *disease*                            |
|  |  | *renal* *failure*                            |
|  |  | *renal* *insufficiency*                      |
|  |  | *renal* *disorder*                           |
|  |  | *kidney* *disease*                           |
|  |  | *kidney* *disorder*                          |
|  |  | *kidney* *failure*                           |
|  |  | *eGFR*                                       |
|  |  | *estimated* *glomerular* *filtration* *rate* |
|  |  | *disease* *renal*                            |
|  |  | *failure* *renal*                            |
|  |  | *insufficiency* *renal*                      |
|  |  | *disorder* *renal*                           |
|  |  | *disease* *kidney*                           |
|  |  | *disorder* *kidney*                          |
|  |  | *failure* *kidney*                           |
|  |  |                                              |
|  |  |                                              |
|  |  | *biliary c*                                  |
|  |  | *destructive* *chol*                         |
|  |  | *cirrhos*                                    |
|  |  | *sclero* *cholangit*                         |
|  |  | *recurr* *cholangit*                         |
|  |  | *chron* *cholangit*                          |
|  |  | *chron* *hepat*                              |
|  |  | *hepat* *chron*                              |
|  |  | *acute* *yellow* *atroph*                    |
|  |  | *hepat* *notif*                              |
|  |  | *granul* *hepat*                             |
|  |  | *alpha* *hepat*                              |
|  |  | *hepat* *tox*                                |
|  |  | *toxop* *hepat*                              |
|  |  | *acute hepatitis c*                          |
|  |  | *alcoh* *hepat*                              |
|  |  | *subacute* *hepat*                           |
|  |  | *nonspec* *hepat*                            |
|  |  | *nonalco* *liver* *dis*                      |
|  |  | *hepat* *malaria*                            |
|  |  | *malaria* *hepat*                            |
|  |  | *autoimm* *hepat*                            |
|  |  | *hepatitis c without*                        |

ANDERSEN ET AL (2023)

PERSONS DIAGNOSED WITH COVID IN ENGLAND IN THE CPRD: A COHORT DESCRIPTION

|    |                                                                     |                                                                                                                                                                                                                                                                                                                                                                                                                                                                                                                                                                                    |
|----|---------------------------------------------------------------------|------------------------------------------------------------------------------------------------------------------------------------------------------------------------------------------------------------------------------------------------------------------------------------------------------------------------------------------------------------------------------------------------------------------------------------------------------------------------------------------------------------------------------------------------------------------------------------|
|    |                                                                     | <p>           **toxic* *hepat*<br/>           *hepatitis C*<br/>           *sequelae* *viral* *hep*<br/>           *chron* *liver* *dis*<br/>           *oesoph* *varices*<br/>           *varices* *oesoph*<br/>           *hepat* *coma*<br/>           **coma* *hepat*<br/>           *enceph* *hepat*<br/>           'hepat* *enceph*<br/>           *sequelae* *liver*<br/>           *liver* *sequelae*<br/>           *portal* *hyperten*<br/>           *hepatoren* *syndro*<br/>           *syndro* *hepatoren*<br/>           *oesophag* *varices*         </p>          |
| 21 | Chronic neurological disease (including dementia, stroke, epilepsy) | <p>           Davidson, J and Warren-Gash, C (2022). Clinical codelist - CPRD Aurum - chronic neurological disease. [Data Collection]. London School of Hygiene &amp; Tropical Medicine, London, United Kingdom. <a href="https://doi.org/10.17037/DATA.00002817">https://doi.org/10.17037/DATA.00002817</a>.<br/><br/>           PANORAMIC criteria details epilepsy and stroke as chronic neurological conditions which were not reflected in the existing code list, and were added using the following search terms<br/>           Epilepsy<br/>           Stroke         </p> |
| 29 |                                                                     | <p>           *epilep*<br/>           *stroke*<br/>           *stroke*<br/>           *cerebr* *infarc*<br/>           *cerebr* *acc*<br/>           *CVA*<br/>           *Tran* *ischemic*         </p>                                                                                                                                                                                                                                                                                                                                                                           |
| 37 | Severe and profound learning disability                             | <p>           Severe and profound learning disability (including terms that 'definitely' indicate a learning disability)<br/>           Angelman syndrome<br/>           Coffin-Lowry syndrome<br/>           Cornelia de lange syndrome<br/>           Cri du chat syndrome<br/><br/>           Dubowitz's syndrome<br/>           Edward's syndrome<br/><br/>           Hurler's syndrome<br/><br/>           Laurence-Moon Syndrome<br/>           Mowat-Wilson syndrome<br/>           Patau syndrome         </p>                                                             |
| 41 |                                                                     | <p>           *learning* *dis*<br/>           *learning* *diff*<br/>           *retard*<br/><br/>           *angelman*<br/>           *Coffin-lowry*<br/>           *cornelia* *lange*<br/>           *cri du chat*<br/>           *5p Deletion*<br/>           *cat* *cry*<br/>           *dubowitz*<br/>           *edwards* *synd*<br/>           *Trisomy* *18*<br/>           *hurler*<br/>           *mucopolysacc*<br/>           *laurence-moon*<br/>           *Mowat-Wilson*<br/>           *Patau*<br/>           *Trisomy* *13*         </p>                           |

ANDERSEN ET AL (2023)

PERSONS DIAGNOSED WITH COVID IN ENGLAND IN THE CPRD: A COHORT DESCRIPTION

|                                                                                                                                                                                                                                                                                    |                                                                                                                                                                                                                                                                     |                                                                                                            |
|------------------------------------------------------------------------------------------------------------------------------------------------------------------------------------------------------------------------------------------------------------------------------------|---------------------------------------------------------------------------------------------------------------------------------------------------------------------------------------------------------------------------------------------------------------------|------------------------------------------------------------------------------------------------------------|
|                                                                                                                                                                                                                                                                                    | Rett syndrome                                                                                                                                                                                                                                                       | *rett *                                                                                                    |
|                                                                                                                                                                                                                                                                                    | Smith-Magenis syndrome                                                                                                                                                                                                                                              | *Smith-Magenis*                                                                                            |
|                                                                                                                                                                                                                                                                                    |                                                                                                                                                                                                                                                                     | *Chromosome* *deletion*                                                                                    |
|                                                                                                                                                                                                                                                                                    | Wolff - Hirschorn syndrome                                                                                                                                                                                                                                          | *wolf* *Hirs*                                                                                              |
| Down's syndrome                                                                                                                                                                                                                                                                    | Down's syndrome                                                                                                                                                                                                                                                     | *down*                                                                                                     |
|                                                                                                                                                                                                                                                                                    |                                                                                                                                                                                                                                                                     | *trisom*                                                                                                   |
|                                                                                                                                                                                                                                                                                    |                                                                                                                                                                                                                                                                     | *mongol*                                                                                                   |
| Diabetes mellitus<br>(Type I or Type II)                                                                                                                                                                                                                                           | Type I                                                                                                                                                                                                                                                              | *type 1 dia*                                                                                               |
|                                                                                                                                                                                                                                                                                    |                                                                                                                                                                                                                                                                     | *type I dia*                                                                                               |
|                                                                                                                                                                                                                                                                                    |                                                                                                                                                                                                                                                                     | *diabetes mellitus juv*                                                                                    |
|                                                                                                                                                                                                                                                                                    |                                                                                                                                                                                                                                                                     | *diabetes mellitus                                                                                         |
|                                                                                                                                                                                                                                                                                    |                                                                                                                                                                                                                                                                     | *insulin dep*                                                                                              |
|                                                                                                                                                                                                                                                                                    |                                                                                                                                                                                                                                                                     | *juvenile onset dia*                                                                                       |
|                                                                                                                                                                                                                                                                                    |                                                                                                                                                                                                                                                                     | *juvenile-onset dia*                                                                                       |
|                                                                                                                                                                                                                                                                                    |                                                                                                                                                                                                                                                                     | *juvenile-onset                                                                                            |
|                                                                                                                                                                                                                                                                                    |                                                                                                                                                                                                                                                                     | *diabetes mellitus type 1*                                                                                 |
|                                                                                                                                                                                                                                                                                    |                                                                                                                                                                                                                                                                     | *diabetes mellitus type I*                                                                                 |
|                                                                                                                                                                                                                                                                                    |                                                                                                                                                                                                                                                                     | *diabetes type 1*                                                                                          |
|                                                                                                                                                                                                                                                                                    |                                                                                                                                                                                                                                                                     | *diabetes type I*                                                                                          |
|                                                                                                                                                                                                                                                                                    | Type II                                                                                                                                                                                                                                                             | *type 2 dia*                                                                                               |
|                                                                                                                                                                                                                                                                                    |                                                                                                                                                                                                                                                                     | *type II dia*                                                                                              |
|                                                                                                                                                                                                                                                                                    |                                                                                                                                                                                                                                                                     | *adult onset dia*                                                                                          |
|                                                                                                                                                                                                                                                                                    |                                                                                                                                                                                                                                                                     | *adult-onset dia*                                                                                          |
|                                                                                                                                                                                                                                                                                    |                                                                                                                                                                                                                                                                     | *non-insulin dep*                                                                                          |
|                                                                                                                                                                                                                                                                                    |                                                                                                                                                                                                                                                                     | *noninsulin dep*                                                                                           |
|                                                                                                                                                                                                                                                                                    |                                                                                                                                                                                                                                                                     | *non-insulin-dep*                                                                                          |
|                                                                                                                                                                                                                                                                                    |                                                                                                                                                                                                                                                                     | *NIDDM*                                                                                                    |
|                                                                                                                                                                                                                                                                                    |                                                                                                                                                                                                                                                                     | *T2D*                                                                                                      |
|                                                                                                                                                                                                                                                                                    |                                                                                                                                                                                                                                                                     | *diabetes type 2*                                                                                          |
|                                                                                                                                                                                                                                                                                    |                                                                                                                                                                                                                                                                     | *diabetes mellitus type 2*                                                                                 |
|                                                                                                                                                                                                                                                                                    |                                                                                                                                                                                                                                                                     | *diabetes type II*                                                                                         |
|                                                                                                                                                                                                                                                                                    |                                                                                                                                                                                                                                                                     | *diabetes mellitus type II*                                                                                |
|                                                                                                                                                                                                                                                                                    |                                                                                                                                                                                                                                                                     | type 2*                                                                                                    |
|                                                                                                                                                                                                                                                                                    |                                                                                                                                                                                                                                                                     | type II*                                                                                                   |
|                                                                                                                                                                                                                                                                                    |                                                                                                                                                                                                                                                                     | *diabetes mellitus adult*                                                                                  |
| Immunosuppression:<br>primary (e.g.,<br>inherited immune<br>disorders resulting<br>from genetic<br>mutations, usually<br>present at birth and<br>diagnosed in<br>childhood) or<br>secondary due to<br>disease or treatment<br>(e.g., sickle cell, HIV,<br>cancer,<br>chemotherapy) | Forbes, H (2020). Therapy Code List - Immunosuppression Aurum Therapy Codes. [Data Collection]. London School of Hygiene & Tropical Medicine, London, United Kingdom. <a href="https://doi.org/10.17037/DATA.00001589">https://doi.org/10.17037/DATA.00001589</a> . | We filtered among therapy codes for moderate immunosuppression for those drugs classified as chemotherapy. |

ANDERSEN ET AL (2023)

## PERSONS DIAGNOSED WITH COVID IN ENGLAND IN THE CPRD: A COHORT DESCRIPTION

|    |                       |                                                                                                      |                            |
|----|-----------------------|------------------------------------------------------------------------------------------------------|----------------------------|
| 1  |                       |                                                                                                      |                            |
| 2  |                       |                                                                                                      |                            |
| 3  | Solid organ, bone     | Forbes, H (2020). Clinical Code List - Moderate Immunosuppression OPCS Codes.                        |                            |
| 4  | marrow and stem cell  | [Data Collection]. London School of Hygiene & Tropical Medicine, London, United                      |                            |
| 5  | transplant recipients | Kingdom. <a href="https://doi.org/10.17037/DATA.00001587">https://doi.org/10.17037/DATA.00001587</a> |                            |
| 6  |                       | Any transplant                                                                                       | *transplant*               |
| 7  |                       | Solid organ transplant                                                                               | *organ* *recipient*        |
| 8  |                       |                                                                                                      | *heart* *recipient*        |
| 9  |                       |                                                                                                      | *lung* *recipient*         |
| 10 |                       |                                                                                                      | *pancreas* *recipient*     |
| 11 |                       |                                                                                                      | *kidney* *recipient*       |
| 12 |                       |                                                                                                      | *intestine* *recipient*    |
| 13 |                       |                                                                                                      | *gland* *recipient*        |
| 14 |                       |                                                                                                      | *stomach* *recipient*      |
| 15 |                       |                                                                                                      | *spleen* *recipient*       |
| 16 |                       |                                                                                                      | *liver* *recipient*        |
| 17 |                       |                                                                                                      | *bladder* *recipient*      |
| 18 |                       | Bone marrow transplant                                                                               | *marrow* *graft*           |
| 19 |                       |                                                                                                      | *graft* *marrow*           |
| 20 |                       | Stem cell transplant                                                                                 | *stem* *transplant*        |
| 21 |                       |                                                                                                      | *transplant* *stem*        |
| 22 |                       |                                                                                                      | *stem* graft*              |
| 23 |                       |                                                                                                      | *graft* *stem*             |
| 24 |                       |                                                                                                      | *obes*                     |
| 25 | Morbid obesity (BMI   |                                                                                                      | *BMI*                      |
| 26 | > 35)                 |                                                                                                      |                            |
| 27 | Severe mental illness | Severe mental illness,                                                                               | *severe* *ment*            |
| 28 |                       | unspecified                                                                                          | *acute* *ment*             |
| 29 |                       |                                                                                                      | *severe* *psy*             |
| 30 |                       |                                                                                                      | *acute* *psy*              |
| 31 |                       |                                                                                                      | *nervous break*            |
| 32 |                       | Schizophrenia                                                                                        | *schiz*                    |
| 33 |                       |                                                                                                      | *psycot*                   |
| 34 |                       |                                                                                                      | *psychosis*                |
| 35 |                       |                                                                                                      | *mania*                    |
| 36 |                       |                                                                                                      | mania*                     |
| 37 |                       |                                                                                                      | *manic*                    |
| 38 |                       | Bipolar disorder                                                                                     | *bipo*                     |
| 39 |                       | Self-harm                                                                                            | *self harm*                |
| 40 |                       |                                                                                                      | *cutt*                     |
| 41 |                       |                                                                                                      | *self* *in*                |
| 42 |                       |                                                                                                      | *self-i*                   |
| 43 |                       |                                                                                                      | *self-h*                   |
| 44 |                       | Obsessive-compulsive disorder                                                                        | *OCD*                      |
| 45 |                       |                                                                                                      | *obsess*                   |
| 46 |                       | Eating disorder                                                                                      | *anor*                     |
| 47 |                       |                                                                                                      | *bulimia*                  |
| 48 |                       |                                                                                                      | *eating dis*               |
| 49 |                       | Medicines for severe mental                                                                          | Agomelatine                |
| 50 |                       | illness                                                                                              | Amoxapine                  |
| 51 |                       |                                                                                                      | Clomipramine hydrochloride |
| 52 |                       |                                                                                                      | Dosulepin hydrochloride    |
| 53 |                       |                                                                                                      | Doxepin hydrochloride      |
| 54 |                       |                                                                                                      | Imipramine hydrochloride   |
| 55 |                       |                                                                                                      |                            |
| 56 |                       |                                                                                                      |                            |
| 57 |                       |                                                                                                      |                            |
| 58 |                       |                                                                                                      |                            |
| 59 |                       |                                                                                                      |                            |
| 60 |                       |                                                                                                      |                            |

ANDERSEN ET AL (2023)

PERSONS DIAGNOSED WITH COVID IN ENGLAND IN THE CPRD: A COHORT DESCRIPTION

---

|    |  |                           |
|----|--|---------------------------|
| 3  |  | Isocarboxazid             |
| 4  |  | Lofepamine hydrochloride  |
| 5  |  | Loxapine succinate        |
| 6  |  | Moclobemide               |
| 7  |  | Nefazodone hydrochloride  |
| 8  |  | Phenelzine sulfate        |
| 9  |  | Reboxetine mesilate       |
| 10 |  | Tranlycypromine sulfate   |
| 11 |  | Trazodone hydrochloride   |
| 12 |  | Trimipramine maleate      |
| 13 |  | Venlafaxine hydrochloride |
| 14 |  | Vortioxetine hydrobromide |

17 Community and care  
18 home resident

\*nursing home\*  
\*home\* \*nursing\*  
\*care\* \*home\*  
\*home\* \*care\*  
\*residen\* \*care\*  
\*care\* \*resident\*

23 Judged by recruiting  
24 medically qualified  
25 professional,  
26 research nurse,  
27 nurse prescriber,  
28 prescribing  
29 pharmacist,  
30 dependent on the ISA  
31 for the specific IMP  
32 involved, to be  
33 clinically vulnerable

---

Unable to define, given nature of secondary database research.

ANDERSEN ET AL (2023)

PERSONS DIAGNOSED WITH COVID IN ENGLAND IN THE CPRD: A COHORT DESCRIPTION

**Supplemental file 1, Table 5: Search Terms for UK Health Security Agency Clinical Risk Group Definition**

| Classification as written in Green Book                                                                                 | Concept as written in Green Book                                                                                        | Search terms                                                                                                                                                                                               |
|-------------------------------------------------------------------------------------------------------------------------|-------------------------------------------------------------------------------------------------------------------------|------------------------------------------------------------------------------------------------------------------------------------------------------------------------------------------------------------|
| Chronic respiratory disease – individuals with a severe lung condition                                                  | Poorly controlled asthma                                                                                                | Asthma with an oral corticosteroid use in the past 24 months                                                                                                                                               |
|                                                                                                                         | Chronic obstructive pulmonary disease (COPD), including chronic bronchitis and emphysema                                | Davidson, J, Warren-Gash, C and McDonald, H (2021). Clinical codelist - CPRD Aurum - chronic respiratory disease. [Data Collection]. London School of Hygiene & Tropical Medicine, London, United Kingdom. |
|                                                                                                                         |                                                                                                                         | <a href="https://doi.org/10.17037/DATA.00002214">https://doi.org/10.17037/DATA.00002214</a> .                                                                                                              |
|                                                                                                                         |                                                                                                                         | *bronchiec*                                                                                                                                                                                                |
|                                                                                                                         |                                                                                                                         | Davidson, J, Warren-Gash, C and McDonald, H (2021). Clinical codelist - CPRD Aurum - chronic respiratory disease. [Data Collection]. London School of Hygiene & Tropical Medicine, London, United Kingdom. |
| <a href="https://doi.org/10.17037/DATA.00002214">https://doi.org/10.17037/DATA.00002214</a> .                           |                                                                                                                         |                                                                                                                                                                                                            |
| Bronchiectasis                                                                                                          | Cystic fibrosis                                                                                                         | *pulmon* *fibros*                                                                                                                                                                                          |
|                                                                                                                         |                                                                                                                         | *lung* *fibros*                                                                                                                                                                                            |
| Interstitial lung fibrosis                                                                                              | Pneumoconiosis                                                                                                          | *fibros* *lung*                                                                                                                                                                                            |
|                                                                                                                         |                                                                                                                         | *ipf*                                                                                                                                                                                                      |
|                                                                                                                         |                                                                                                                         | *pneumocon*                                                                                                                                                                                                |
|                                                                                                                         |                                                                                                                         | *asbestosis*                                                                                                                                                                                               |
|                                                                                                                         |                                                                                                                         | *silicos*                                                                                                                                                                                                  |
| Bronchopulmonary dysplasia (BPD)                                                                                        | Congenital heart disease                                                                                                | *broncho* *dysplas*                                                                                                                                                                                        |
|                                                                                                                         |                                                                                                                         | *BDP*                                                                                                                                                                                                      |
| Chronic heart disease and vascular disease                                                                              | Hypertension with cardiac complications                                                                                 | *congen* *hear*                                                                                                                                                                                            |
|                                                                                                                         |                                                                                                                         | *congen* *card*                                                                                                                                                                                            |
|                                                                                                                         |                                                                                                                         | *CHD*                                                                                                                                                                                                      |
|                                                                                                                         |                                                                                                                         | *hyperten*                                                                                                                                                                                                 |
|                                                                                                                         |                                                                                                                         | *high* *blood* *pres*                                                                                                                                                                                      |
| Chronic heart failure                                                                                                   | Individuals requiring regular medication and/or follow-up for ischaemic heart disease (includes individuals with atrial | * bp *                                                                                                                                                                                                     |
|                                                                                                                         |                                                                                                                         | *bp*                                                                                                                                                                                                       |
|                                                                                                                         |                                                                                                                         | *HBP*                                                                                                                                                                                                      |
|                                                                                                                         |                                                                                                                         | *HTN*                                                                                                                                                                                                      |
|                                                                                                                         |                                                                                                                         | *CCF*                                                                                                                                                                                                      |
| Individuals requiring regular medication and/or follow-up for ischaemic heart disease (includes individuals with atrial | Individuals requiring regular medication and/or follow-up for ischaemic heart disease (includes individuals with atrial | *CHF*                                                                                                                                                                                                      |
|                                                                                                                         |                                                                                                                         | *hear* *fail*                                                                                                                                                                                              |
|                                                                                                                         |                                                                                                                         | *card* *fail*                                                                                                                                                                                              |
|                                                                                                                         |                                                                                                                         | *hear* *diseas*                                                                                                                                                                                            |
|                                                                                                                         |                                                                                                                         | *artero* *diseas*                                                                                                                                                                                          |
| Individuals requiring regular medication and/or follow-up for ischaemic heart disease (includes individuals with atrial | Individuals requiring regular medication and/or follow-up for ischaemic heart disease (includes individuals with atrial | *vasc* *diseas*                                                                                                                                                                                            |
|                                                                                                                         |                                                                                                                         | *CAD*                                                                                                                                                                                                      |
|                                                                                                                         |                                                                                                                         | *ihd*                                                                                                                                                                                                      |

ANDERSEN ET AL (2023)

PERSONS DIAGNOSED WITH COVID IN ENGLAND IN THE CPRD: A COHORT DESCRIPTION

|                        |                                                                                   |                                                                                                                                                                                                                                                                                                                                                                                             |
|------------------------|-----------------------------------------------------------------------------------|---------------------------------------------------------------------------------------------------------------------------------------------------------------------------------------------------------------------------------------------------------------------------------------------------------------------------------------------------------------------------------------------|
|                        | fibrillation, peripheral vascular disease or a history of venous thromboembolism) | *myocard*<br>*isch*<br>*chd*<br>*fibrilla*<br>*afib*<br>*VTE*<br>*thrombo*<br>*DVT*<br>*blood* *clot*<br>*pulmon* *embolis*<br>* pe *                                                                                                                                                                                                                                                       |
| Chronic kidney disease | At stage 3, 4 or 5<br>Chronic kidney failure                                      | *CKD*<br>*renal* *disease*<br>*renal* *failure*<br>*renal* *insufficiency*<br>*renal* *disorder*<br>*kidney* *disease*<br>*kidney* *disorder*<br>*kidney* *failure*<br>*eGFR*<br>*estimated* *glomerular* *filtration* *rate*<br>*disease* *renal*<br>*failure* *renal*<br>*insufficiency* *renal*<br>*disorder* *renal*<br>*disease* *kidney*<br>*disorder* *kidney*<br>*failure* *kidney* |
|                        | Nephrotic syndrome<br>Kidney transplantation                                      | *nephro*<br>Davidson, J, Warren-Gash, C, Mcdonald, H, Evans, D and Clay, S (2021). Clinical codelist - chronic kidney disease. [Data Collection]. London School of Hygiene & Tropical Medicine, London, United Kingdom.<br><a href="https://doi.org/10.17037/DATA.00002406">https://doi.org/10.17037/DATA.00002406</a> .                                                                    |
|                        |                                                                                   | We selected transplant-specific codes.                                                                                                                                                                                                                                                                                                                                                      |
| Chronic liver disease  | Chronic hepatitis                                                                 | *chron* *hepat*<br>*hepat* *chron*<br>*acute* *yellow* *atroph*<br>*hepat* *notif*<br>*granul* *hepat*<br>*alpha* *hepat*<br>*hepat* *tox*<br>*toxop* *hepat*<br>*acute hepatitis c*<br>*alcoh* *hepat*<br>*subacute* *hepat*                                                                                                                                                               |





ANDERSEN ET AL (2023)

PERSONS DIAGNOSED WITH COVID IN ENGLAND IN THE CPRD: A COHORT DESCRIPTION

|    |                            |        |                                             |
|----|----------------------------|--------|---------------------------------------------|
| 1  |                            |        | *cri du chat*                               |
| 2  |                            |        | *5p Deletion*                               |
| 3  |                            |        | *cat* *cry*                                 |
| 4  |                            |        | *dubowitz*                                  |
| 5  |                            |        | *edwards* *synd*                            |
| 6  |                            |        | *Trisomy* *18*                              |
| 7  |                            |        | *hurler*                                    |
| 8  |                            |        | *mucopolysacc*                              |
| 9  |                            |        | *laurence-moon*                             |
| 10 |                            |        | *Mowat-Wilson*                              |
| 11 |                            |        | *Patau*                                     |
| 12 |                            |        | *Trisomy* *13*                              |
| 13 |                            |        | *rett *                                     |
| 14 |                            |        | *Smith-Magenis*                             |
| 15 |                            |        | *Chromosome* *deletion*                     |
| 16 |                            |        | *wolf* *Hirs*                               |
| 17 |                            |        | *down*                                      |
| 18 | Down's syndrome            |        | *trisomy*                                   |
| 19 |                            |        | *mongol*                                    |
| 20 |                            |        | *multiple sclerosis*                        |
| 21 | Multiple sclerosis         |        | *sclerosis multiple*                        |
| 22 |                            |        | *encephalomyelit* *disseminat*              |
| 23 |                            |        | *ms*                                        |
| 24 | Epilepsy                   |        | *epilep*                                    |
| 25 | Dementia                   |        | *demen*                                     |
| 26 |                            |        | *senil*                                     |
| 27 |                            |        | *parkinson*                                 |
| 28 | Parkinson's disease        |        | *hypo* *rigid*                              |
| 29 |                            |        | *parlay* *agit*                             |
| 30 |                            |        | *shak* *pals*                               |
| 31 |                            |        | * pd *                                      |
| 32 |                            |        | *motor* *neurone* *disease*                 |
| 33 | Motor neurone disease      |        | *kennedy*                                   |
| 34 | and related or similar     |        | *amyotrophic* *lateral* *sclerosis*         |
| 35 | conditions, hereditary and |        | *ALS*                                       |
| 36 | degenerative disease of    |        | *primary* *lateral* *sclerosis*             |
| 37 | the nervous system or      |        | *progressive* *bulbar* *palsy*              |
| 38 | muscles, severe            |        | *progressive* *spinal* *muscular* *atrophy* |
| 39 | neurological disability    |        | *myo*                                       |
| 40 |                            |        |                                             |
| 41 |                            |        |                                             |
| 42 |                            |        |                                             |
| 43 |                            |        |                                             |
| 44 |                            |        |                                             |
| 45 | Diabetes mellitus and      | Type I | *type 1 dia*                                |
| 46 | other endocrine disorders  |        | *type I dia*                                |
| 47 |                            |        | *diabetes mellitus juv*                     |
| 48 |                            |        | *diabetes mellitus                          |
| 49 |                            |        | *insulin dep*                               |
| 50 |                            |        | *juvenile onset dia*                        |
| 51 |                            |        | *juvenile-onset dia*                        |
| 52 |                            |        | *juvenile-onset                             |
| 53 |                            |        | *diabetes mellitus type 1*                  |
| 54 |                            |        | *diabetes mellitus type I*                  |
| 55 |                            |        | *diabetes type 1*                           |
| 56 |                            |        |                                             |
| 57 |                            |        |                                             |
| 58 |                            |        |                                             |
| 59 |                            |        |                                             |
| 60 |                            |        |                                             |

ANDERSEN ET AL (2023)  
 PERSONS DIAGNOSED WITH COVID IN ENGLAND IN THE CPRD: A COHORT DESCRIPTION

|                                               |                                                               |                                                                                                                                                                                                                                                                                                                                                                                                                           |
|-----------------------------------------------|---------------------------------------------------------------|---------------------------------------------------------------------------------------------------------------------------------------------------------------------------------------------------------------------------------------------------------------------------------------------------------------------------------------------------------------------------------------------------------------------------|
|                                               | Type II                                                       | *diabetes type I*<br>*type 2 dia*<br>*type II dia*<br>*adult onset dia*<br>*adult-onset dia*<br>*non-insulin dep*<br>*noninsulin dep*<br>*non-insulin-dep*<br>*NIDDM*<br>*T2D*<br>*diabetes type 2*<br>*diabetes mellitus type 2*<br>*diabetes type II*<br>*diabetes mellitus type II*<br>type 2*<br>type II*<br>*diabetes mellitus adult*                                                                                |
|                                               | Addison's disease                                             | *Addison*<br>*adren* *insuff*<br>*hypocort*<br>*hypoadren*                                                                                                                                                                                                                                                                                                                                                                |
| Immunosuppression due to disease or treatment | Patients undergoing chemotherapy leading to immunosuppression | Forbes, H (2020). Therapy Code List - Immunosuppression Aurum Therapy Codes. [Data Collection]. London School of Hygiene & Tropical Medicine, London, United Kingdom.<br><a href="https://doi.org/10.17037/DATA.00001589">https://doi.org/10.17037/DATA.00001589</a> .                                                                                                                                                    |
|                                               | Patients undergoing radical radiotherapy                      | We filtered among therapy codes for moderate immunosuppression for those drugs classified as chemotherapy.<br>Davidson, J, Warren-Gash, C and Mcdonald, H (2021). Clinical codelist - CPRD Aurum - Immuosuppressive conditions. [Data Collection]. London School of Hygiene & Tropical Medicine, London, United Kingdom.<br><a href="https://doi.org/10.17037/DATA.00002234">https://doi.org/10.17037/DATA.00002234</a> . |
|                                               | Solid organ transplant recipients                             | We filtered for radiotherapy-specific codes.<br>*transplant*<br>*organ* *recipient*<br>*heart* *recipient*<br>*lung* *recipient*<br>*pancreas* *recipient*<br>*kidney* *recipient*<br>*intestine* *recipient*<br>*gland* *recipient*<br>*stomach* *recipient*<br>*spleen* *recipient*<br>*liver* *recipient*                                                                                                              |

ANDERSEN ET AL (2023)

## PERSONS DIAGNOSED WITH COVID IN ENGLAND IN THE CPRD: A COHORT DESCRIPTION

|  |                                                                                                                                                                                                                                                                                                                                             |                                                                                                                                                                                                                                                                                                                                                                                                                            |
|--|---------------------------------------------------------------------------------------------------------------------------------------------------------------------------------------------------------------------------------------------------------------------------------------------------------------------------------------------|----------------------------------------------------------------------------------------------------------------------------------------------------------------------------------------------------------------------------------------------------------------------------------------------------------------------------------------------------------------------------------------------------------------------------|
|  |                                                                                                                                                                                                                                                                                                                                             | *bladder* *recipient*                                                                                                                                                                                                                                                                                                                                                                                                      |
|  | Bone marrow or stem cell transplant recipients                                                                                                                                                                                                                                                                                              | LSHTM - Forbes, H (2020). Clinical Code List - Moderate Immunosuppression OPCS Codes. [Data Collection]. London School of Hygiene & Tropical Medicine, London, United Kingdom.<br><a href="https://doi.org/10.17037/DATA.00001587">https://doi.org/10.17037/DATA.00001587</a> .                                                                                                                                            |
|  | HIV infection at all stages                                                                                                                                                                                                                                                                                                                 | *HIV*                                                                                                                                                                                                                                                                                                                                                                                                                      |
|  | Multiple myeloma or genetic disorders affecting the immune system (e.g. IRAK-4, NEMO, complement disorder, SCID)                                                                                                                                                                                                                            | *immunodeficiency vir*<br>*myelom*<br>*kahler*<br>*NEMO*<br>*nuclear* *fact*<br>*IKBK* *mut*<br>*NFKB*<br>*complement*<br>*SCID*<br>*combin* *immune*<br>*alympho*<br>*glanz* *synd*<br>*immunodef* *synd*                                                                                                                                                                                                                 |
|  | Individuals who are receiving immunosuppressive or immunomodulating biological therapy including, but not limited to, anti-TNF, alemtuzumab, ofatumumab, rituximab, patients receiving protein kinase inhibitors or PARP inhibitors, and individuals treated with steroid sparing agents such as cyclophosphamide and mycophenolate mofetil | Adalimumab<br>Etanercept<br>Infliximab<br>Golimumab<br>Certolizumab pegol<br>Abatacept<br>Olaparib<br>Rucaparib<br>Niraparib<br>Afatinib<br>Axitinib<br>Bosutinib<br>Cetuximab<br>Cobimetinib<br>Crizotinib<br>Cabozantinib<br>Dacomitinib<br>Dasatinib<br>Entrectinib<br>Erlotinib<br>Fostamatinib<br>Gefitinib<br>Ibrutinib<br>Imatinib<br>Lapatinib<br>Nilotinib<br>Paxopanib<br>Pegaptanib<br>Ruxolitinib<br>Sorafenib |

ANDERSEN ET AL (2023)

## PERSONS DIAGNOSED WITH COVID IN ENGLAND IN THE CPRD: A COHORT DESCRIPTION

|                                                                                                      |                                                                                                                                                                                                             |                                                                                                                                  |
|------------------------------------------------------------------------------------------------------|-------------------------------------------------------------------------------------------------------------------------------------------------------------------------------------------------------------|----------------------------------------------------------------------------------------------------------------------------------|
|                                                                                                      |                                                                                                                                                                                                             | Sunitinib                                                                                                                        |
|                                                                                                      |                                                                                                                                                                                                             | Vandetanib                                                                                                                       |
|                                                                                                      |                                                                                                                                                                                                             | Vemurafenib                                                                                                                      |
|                                                                                                      | Individuals treated with or likely to be treated with systemic steroids for more than a month at a dose equivalent to prednisolone at 20mg or more per day for adults                                       | Betamethasone<br>Cortisone<br>Dexamethasone<br>Hydrocortisone<br>Methylprednisolone<br>Prednisolone                              |
|                                                                                                      | Anyone with a history of haematological malignancy, including leukaemia, lymphoma, and myeloma                                                                                                              | *CMML*<br>*chronic myelom*<br>*lymph* *leuk*<br>*CLL*<br>*follic* *lymph*<br>* fl *                                              |
|                                                                                                      | Those who require long term immunosuppressive treatment for conditions including but not limited to: systemic lupus erythematosus, rheumatoid arthritis, inflammatory bowel disease, scleroderma, psoriasis | Using drugs listed above                                                                                                         |
| Asplenia or dysfunction of the spleen. This includes conditions that may lead to splenic dysfunction | Asplenia                                                                                                                                                                                                    | *asplen*<br>*heterotax*<br>*situs*<br>*ambig*<br>*sickl*<br>*SCD*<br>*thal*<br>*coelia*<br>*celia*<br>*sprue*<br>*glut* *entero* |
|                                                                                                      | Homozygous sickle cell disease                                                                                                                                                                              |                                                                                                                                  |
|                                                                                                      | Thalassemia major                                                                                                                                                                                           |                                                                                                                                  |
|                                                                                                      | Coeliac syndrome                                                                                                                                                                                            |                                                                                                                                  |
| Morbid obesity (adults with a BMI >40kg/m <sup>2</sup> )                                             | Obesity with specification of BMI >40kgm <sup>2</sup>                                                                                                                                                       | *obes*<br>*BMI*<br>Measured values using height and weight which calculate to >40 kgm <sup>2</sup>                               |
| Severe mental illness                                                                                | Schizophrenia                                                                                                                                                                                               | *schiz*<br>*psycot*<br>*psychosis*<br>* mania*<br>mania*<br>*manic*<br>*bipo*<br>*severe* *ment*                                 |
|                                                                                                      | Bipolar disorder                                                                                                                                                                                            |                                                                                                                                  |
|                                                                                                      | Any mental illness that                                                                                                                                                                                     |                                                                                                                                  |

ANDERSEN ET AL (2023)

PERSONS DIAGNOSED WITH COVID IN ENGLAND IN THE CPRD: A COHORT DESCRIPTION

|                                                            |                                     |                                                                                                                                                                                                  |
|------------------------------------------------------------|-------------------------------------|--------------------------------------------------------------------------------------------------------------------------------------------------------------------------------------------------|
|                                                            | causes severe functional impairment | *acute* *ment*<br>*severe* *psy*<br>*acute* *psy*<br>*nervous break*<br>*self harm*<br>*cutt*<br>*self* *in*<br>*self-i*<br>*self-h*<br>*OCD*<br>*obsess*<br>*anor*<br>*bulimia*<br>*eating dis* |
| Pregnancy (all stages (first, second and third trimester)) | Pregnancy                           | *pregnan*<br>*trimest*                                                                                                                                                                           |
|                                                            | End of pregnancy                    | *gestat*<br>*birth*<br>*deliver*<br>*abortio*                                                                                                                                                    |

ANDERSEN ET AL (2023)

PERSONS DIAGNOSED WITH COVID IN ENGLAND IN THE CPRD: A COHORT DESCRIPTION

**Supplemental file 1, Table 6: Cohort Attrition**

|                                                                                                                                                                                                                                                                                 | <b>Unique person ID's</b> |
|---------------------------------------------------------------------------------------------------------------------------------------------------------------------------------------------------------------------------------------------------------------------------------|---------------------------|
| Persons of any age diagnosed with COVID from August 1, 2020 through January 31, 2022 using the May 2022 CPRD Aurum data release.                                                                                                                                                | 2,631,267                 |
| Files of "acceptable research quality", as defined by CPRD.                                                                                                                                                                                                                     | 2,631,267                 |
| Continuously registered with CPRD GP practice for at least 365 days prior to COVID diagnosis, and did not have a registration end date, practice last collection date or death date prior to COVID diagnosis.                                                                   | 2,322,875                 |
| Hospital Episode Statistics (HES) Admitted Patient Care (APC) linkage eligible.                                                                                                                                                                                                 | 2,289,708                 |
| Once ONS data were received, 42 persons were noted that should have been excluded from the final cohort because ONS death data preceded index date.                                                                                                                             | 2,289,666                 |
| Excluded persons who were admitted to the hospital on or before their primary care recorded date of COVID diagnosis. Due to mandatory GP reporting guidelines, this may be lagged from the date of true test collection and therefore not accurately reflect date of diagnosis. | 2,271,072                 |

ANDERSEN ET AL (2023)  
PERSONS DIAGNOSED WITH COVID IN ENGLAND IN THE CPRD: A COHORT DESCRIPTION

**Supplemental file 1, Figure 1: Date of Diagnosis for 2,271,072 COVID Cases in CPRD Aurum, By Care Setting, August 1, 2020 through January 31, 2022**

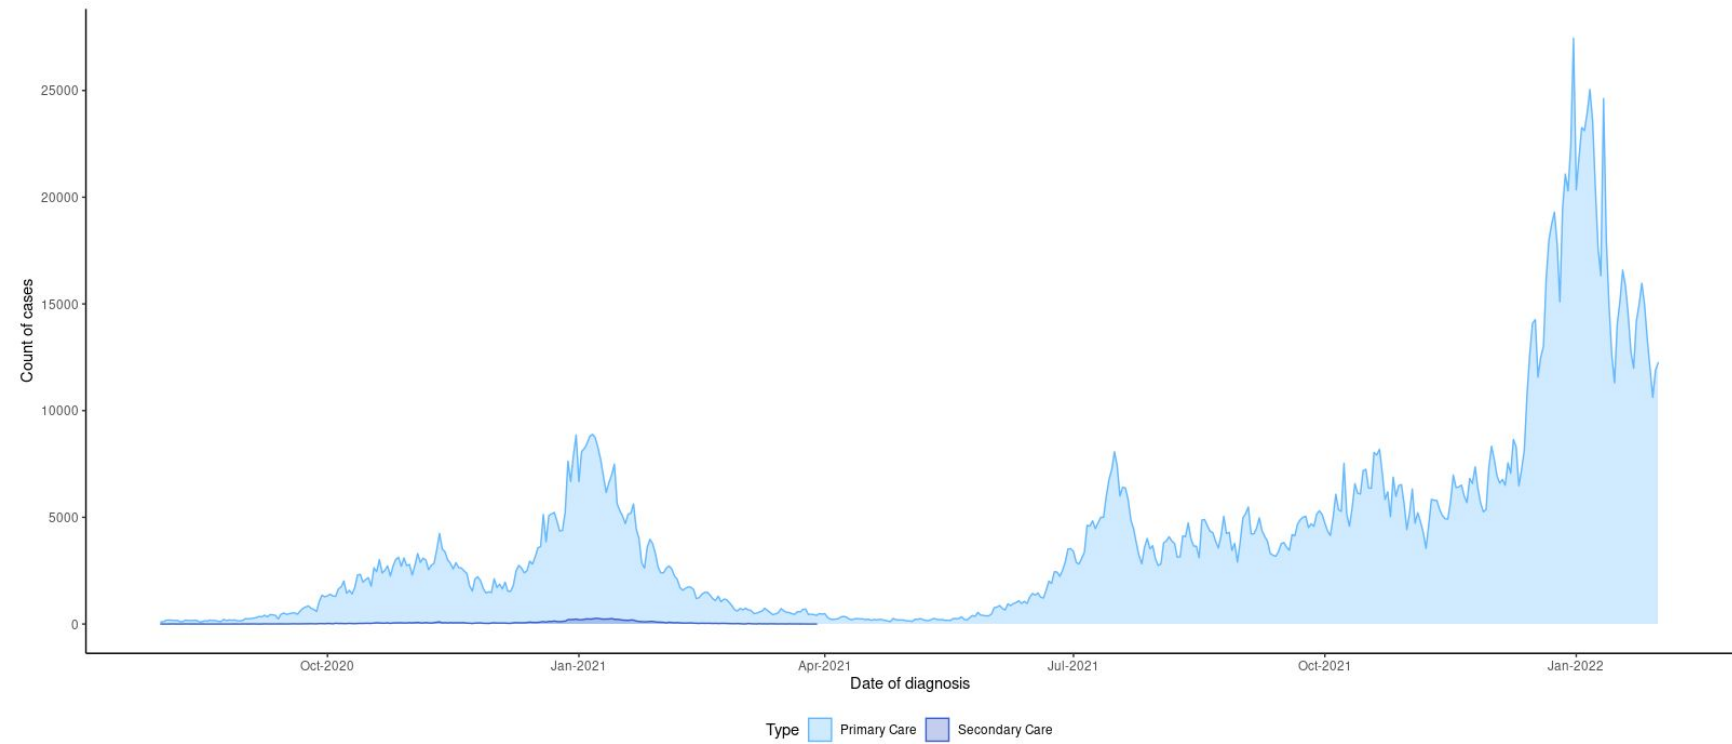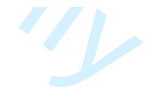



ANDERSEN ET AL (2023)

PERSONS DIAGNOSED WITH COVID IN ENGLAND IN THE CPRD: A COHORT DESCRIPTION

**Supplemental file 1, Figure 2: Date of Diagnosis for 2,257,907 Primary Care COVID Cases in CPRD Aurum, August 1, 2020 through January 31, 2022**

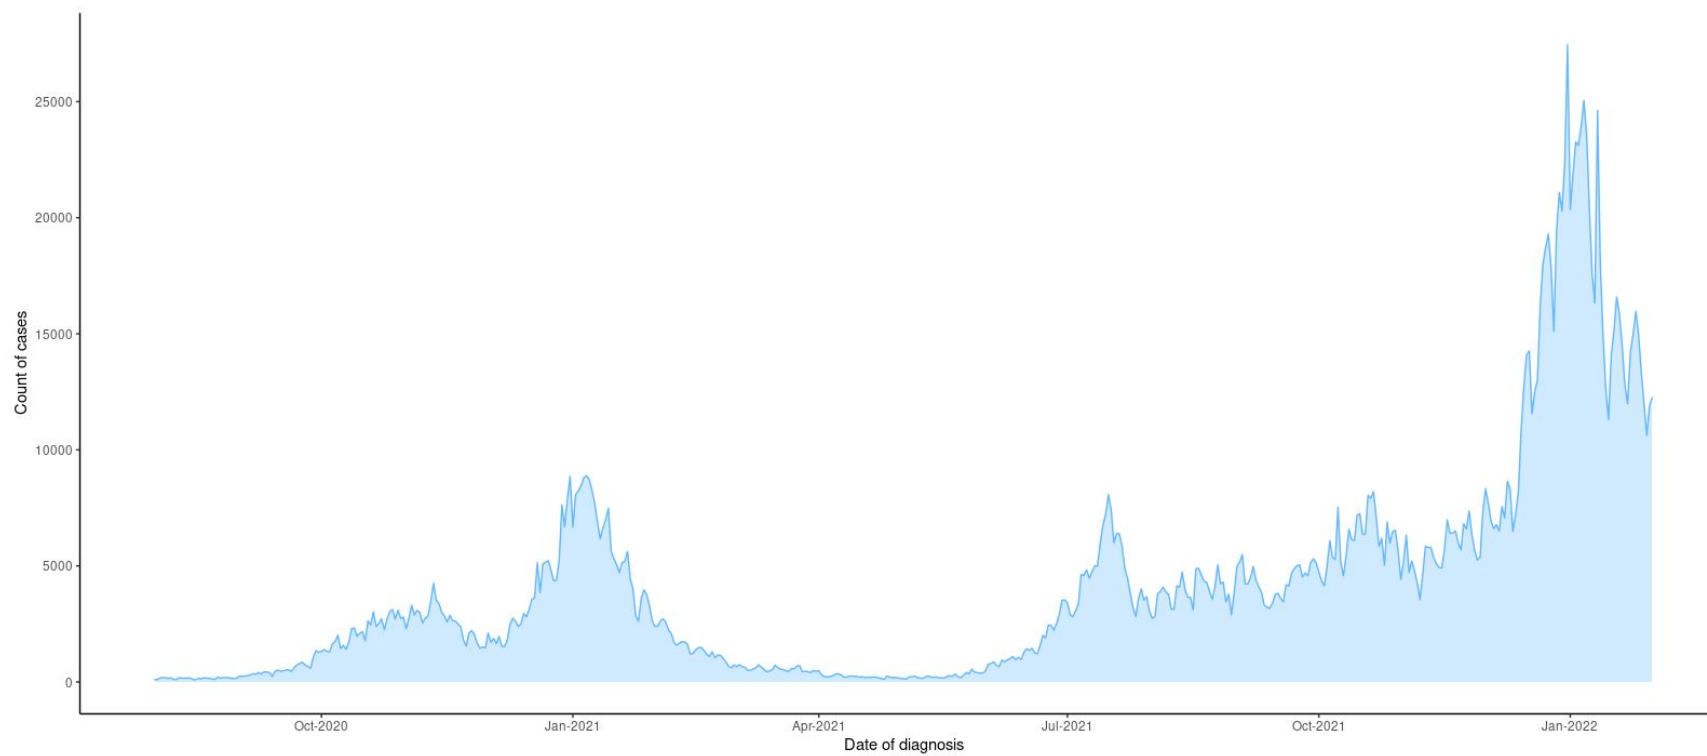

ANDERSEN ET AL (2023)  
PERSONS DIAGNOSED WITH COVID IN ENGLAND IN THE CPRD: A COHORT DESCRIPTION  
**Supplemental file 1, Figure 3: Date of Primary Care Recorded Diagnosis in CPRD Aurum-HES Linked Data for 13,165 Hospitalised COVID Cases, August 1, 2020 through March 31, 2021**

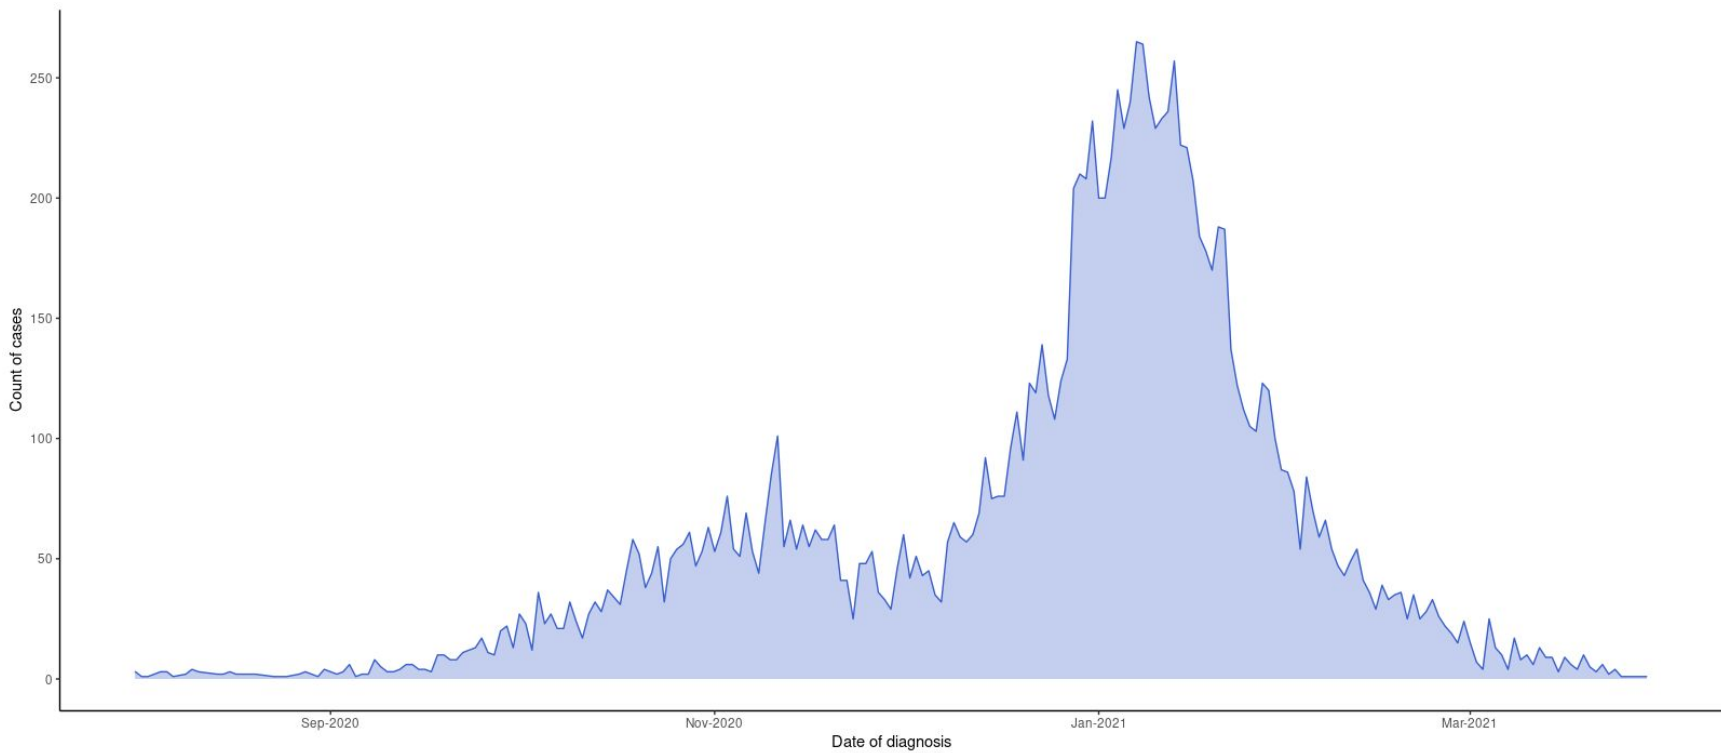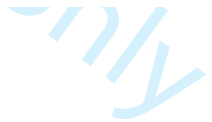

ANDERSEN ET AL (2023)

PERSONS DIAGNOSED WITH COVID IN ENGLAND IN THE CPRD: A COHORT DESCRIPTION

**Supplemental file 1, Table 7: Reference National Case Counts and Census Distributions for England**

|                            | All COVID Cases<br>(n = 20,386,786) | COVID Admissions<br>(n = 954,124) | Population of England<br>(n = 56,489,800) |
|----------------------------|-------------------------------------|-----------------------------------|-------------------------------------------|
| <b>Age groups in years</b> |                                     |                                   |                                           |
| 0-4                        | 454,587 (2%)                        | --                                | 3,077,000 (5%)                            |
| 5-9                        | 1,146,248 (6%)                      | --                                | 3,348,600 (6%)                            |
| 10-14                      | 1,626,090 (8%)                      | --                                | 3,413,100 (6%)                            |
| 15-19                      | 1,396,404 (7%)                      | --                                | 3,218,900 (6%)                            |
| 20-24                      | 1,567,499 (8%)                      | --                                | 3,414,400 (6%)                            |
| 25-29                      | 1,735,467 (9%)                      | --                                | 3,715,400 (7%)                            |
| 30-34                      | 1,795,926 (9%)                      | --                                | 3,952,600 (7%)                            |
| 35-39                      | 1,714,241 (8%)                      | --                                | 3,795,400 (7%)                            |
| 40-44                      | 1,637,287 (8%)                      | --                                | 3,580,400 (6%)                            |
| 45-49                      | 1,477,924 (7%)                      | --                                | 3,602,600 (6%)                            |
| 50-54                      | 1,431,931 (7%)                      | --                                | 3,907,700 (7%)                            |
| 55-59                      | 1,241,556 (6%)                      | --                                | 3,806,300 (7%)                            |
| 60-64                      | 929,614 (5%)                        | --                                | 3,256,100 (6%)                            |
| 65-69                      | 626,179 (3%)                        | --                                | 2,767,500 (5%)                            |
| 70-74                      | 523,000 (3%)                        | --                                | 2,796,600 (5%)                            |
| 75-79                      | 391,839 (2%)                        | --                                | 2,038,800 (4%)                            |
| 80-84                      | 277,529 (1%)                        | --                                | 1,427,900 (2%)                            |
| 85-89                      | 277,112 (1%)                        | --                                | 872,200 (2%)                              |
| 90+                        | 192,353 (1%)                        | --                                | 498,200 (< 1%)                            |
| 0-5                        | --                                  | 20,400 (2%)                       | --                                        |
| 6-17                       | --                                  | 13,942 (1%)                       | --                                        |
| 18-64                      | --                                  | 335,675 (35%)                     | --                                        |
| 65-84                      | --                                  | 379,584 (40%)                     | --                                        |
| 85+                        | --                                  | 199,497 (21%)                     | --                                        |
| Unknown                    | --                                  | 5,026 (1%)                        | --                                        |
| <b>Sex</b>                 |                                     |                                   |                                           |
| Male                       | 9,245,295 (45%)                     | --                                | 27,656,300 (49%)                          |
| Female                     | 11,141,491 (55%)                    | --                                | 28,833,500 (51%)                          |
| <b>Region</b>              |                                     |                                   |                                           |
| North East                 | 948,543 (5%)                        | --                                | 2,647,100 (5%)                            |
| North West                 | 2,582,413 (13%)                     | --                                | 7,417,300 (13%)                           |
| Yorkshire and The Humber   | 1,825,820 (9%)                      | --                                | 5,480,800 (10%)                           |
| East Midlands              | 1,623,157 (8%)                      | --                                | 4,880,200 (9%)                            |
| West Midlands              | 1,942,370 (10%)                     | --                                | 5,950,800 (11%)                           |
| East of England            | 2,101,467 (10%)                     | --                                | 6,334,500 (11%)                           |
| London                     | 2,914,578 (14%)                     | --                                | 8,799,800 (16%)                           |
| South East                 | 3,125,838 (15%)                     | --                                | 9,278,100 (16%)                           |
| South West                 | 1,834,854 (9%)                      | --                                | 5,701,200 (10%)                           |
| Unknown                    | 1,487,746 (7%)                      | --                                | --                                        |

Note: coronavirus.data.gov.uk no longer publishes case counts by age, sex or region at the day level. It was not possible to limit to the study period of August 1, 2020 – January 31, 2022, and therefore the results

ANDERSEN ET AL (2023)  
PERSONS DIAGNOSED WITH COVID IN ENGLAND IN THE CPRD: A COHORT DESCRIPTION

above reflect the figures as accessed on January 31, 2023 of the total number of cases since the start of the pandemic.

For peer review only

1  
2  
3  
4  
5  
6  
7  
8  
9  
10  
11  
12  
13  
14  
15  
16  
17  
18  
19  
20  
21  
22  
23  
24  
25  
26  
27  
28  
29  
30  
31  
32  
33  
34  
35  
36  
37  
38  
39  
40  
41  
42  
43  
44  
45  
46  
47  
48  
49  
50  
51  
52  
53  
54  
55  
56  
57  
58  
59  
60

ANDERSEN ET AL (2023)

PERSONS DIAGNOSED WITH COVID IN ENGLAND IN THE CPRD: A COHORT DESCRIPTION

**Supplemental file 1, Table 8: Regional Distribution of CPRD COVID cohorts, CPRD Practices, COVID Cases and Population of England**

| Region                   | CPRD Aurum                               |                                       |                         | England                          |                             |
|--------------------------|------------------------------------------|---------------------------------------|-------------------------|----------------------------------|-----------------------------|
|                          | Primary Care COVID Cases (n = 2,257,907) | Hospitalized COVID Cases (n = 13,165) | All CPRD Aurum Patients | All COVID Cases (n = 20,386,786) | Population (n = 56,489,800) |
| North East               | 4%                                       | 4%                                    | 5%                      | 5%                               | 5%                          |
| North West               | 21%                                      | 22%                                   | 17%                     | 13%                              | 13%                         |
| Yorkshire and The Humber | 3%                                       | 3%                                    | 4%                      | 9%                               | 10%                         |
| East Midlands            | 2%                                       | 2%                                    | 3%                      | 8%                               | 9%                          |
| West Midlands            | 17%                                      | 16%                                   | 18%                     | 10%                              | 11%                         |
| East of England          | 4%                                       | 3%                                    | 5%                      | 10%                              | 11%                         |
| London                   | 19%                                      | 23%                                   | 16%                     | 14%                              | 16%                         |
| South East               | 20%                                      | 20%                                   | 20%                     | 15%                              | 16%                         |
| South West               | 10%                                      | 8%                                    | 14%                     | 9%                               | 10%                         |
| Unknown                  | < 1%                                     | 0                                     |                         | 7%                               | --                          |

All CPRD Aurum patients refers figures published in "Data resource profile: Clinical Practice Research Datalink (CPRD) Aurum" by Wolf et al (International Journal of Epidemiology 2019). We were unable to find more recent distributions by ONS region of all CPRD Aurum patients.

For all COVID cases, coronavirus.data.gov.uk no longer publishes case counts by region at the day level. It was not possible to limit to the study period of August 1, 2020 – January 31, 2022, and therefore the results above reflect the figures as accessed on January 31, 2023 of the total number of cases since the start of the pandemic.

For the population of England, we used ONS 2021 Census figures.

ANDERSEN ET AL (2023)

PERSONS DIAGNOSED WITH COVID IN ENGLAND IN THE CPRD: A COHORT DESCRIPTION

**Supplemental file 1, Table 9: Characteristics of Primary Care COVID Cases in CPRD Aurum, by High Risk Definitions**

|                                      | All (n =<br>2,257,907) | Meeting NHS<br>Highest Risk<br>Conditions<br>(n = 249,972) | Meeting<br>PANORAMIC<br>Criteria<br>(n = 691,593) | Meeting<br>UKHSA<br>Clinical Risk<br>(n = 225,051) |
|--------------------------------------|------------------------|------------------------------------------------------------|---------------------------------------------------|----------------------------------------------------|
| Cases meeting definition             | --                     | 11%                                                        | 31%                                               | 10%                                                |
| Age, mean (SD)                       | 34 (19)                | 53 (18)                                                    | 55 (15)                                           | 49 (21)                                            |
| Sex                                  |                        |                                                            |                                                   |                                                    |
| Male                                 | 1,046,275 (46%)        | 37%                                                        | 45%                                               | 42%                                                |
| Female                               | 1,211,592 (54%)        | 63%                                                        | 55%                                               | 58%                                                |
| Unknown                              | 40 (< 1%)              | < 1%                                                       | < 1%                                              | < 1%                                               |
| General Practitioner Practice Region |                        |                                                            |                                                   |                                                    |
| North East                           | 83,834 (4%)            | 12,776 (5%)                                                | 29,115 (4%)                                       | 9,678 (4%)                                         |
| North West                           | 471,195 (21%)          | 60,632 (23%)                                               | 157,317 (23%)                                     | 53,930 (24%)                                       |
| Yorkshire and The<br>Humber          | 71,429 (3%)            | 8,563 (3%)                                                 | 23,079 (3%)                                       | 7,532 (3%)                                         |
| East Midlands                        | 49,651 (2%)            | 5,472 (2%)                                                 | 14,001 (2%)                                       | 4,678 (2%)                                         |
| West Midlands                        | 377,125 (17%)          | 43,550 (17%)                                               | 118,027 (17%)                                     | 38,817 (17%)                                       |
| East of England                      | 95,139 (4%)            | 10,394 (4%)                                                | 28,546 (4%)                                       | 7,824 (3%)                                         |
| London                               | 424,908 (19%)          | 45,690 (18%)                                               | 118,663 (17%)                                     | 40,268 (18%)                                       |
| South East                           | 448,536 (20%)          | 45,430 (17%)                                               | 130,283 (19%)                                     | 38,808 (17%)                                       |
| South West                           | 235,785 (10%)          | 27,437 (11%)                                               | 72,473 (10%)                                      | 23,480 (10%)                                       |
| Unknown                              | 305 (< 1%)             | 28 (< 1%)                                                  | 89 (< 1%)                                         | 36 (< 1%)                                          |
| Non-immunocompromised                | 2,193,241<br>(100%)    | 218,912<br>(100%)                                          | 648,474<br>(100%)                                 | 196,621<br>(100%)                                  |
| Unvaccinated                         | 1,170,509 (53%)        | 82,484 (38%)                                               | 236,106 (36%)                                     | 96,498 (49%)                                       |
| 1 COVID vaccine dose                 | 173,853 (8%)           | 9,527 (4%)                                                 | 28,711 (5%)                                       | 12,469 (6%)                                        |
| 2 COVID vaccine doses                | 598,367 (27%)          | 73,907 (34%)                                               | 234,570 (36%)                                     | 54,869 (28%)                                       |
| First booster                        | 250,512 (12%)          | 52,994 (24%)                                               | 149,087 (23%)                                     | 32,785 (17%)                                       |
| Immunocompromised                    | 64,666<br>(100%)       | 41,060<br>(100%)                                           | 43,119<br>(100%)                                  | 28,430<br>(100%)                                   |
| Unvaccinated                         | 1,306 (2%)             | 832 (2%)                                                   | 791 (2%)                                          | 675 (2%)                                           |
| 1 COVID vaccine dose                 | 6,033 (9%)             | 3,556 (9%)                                                 | 3,105 (7%)                                        | 2,661 (9%)                                         |
| 2 COVID vaccine doses                | 33,953 (53%)           | 20,928 (51%)                                               | 21,636 (50%)                                      | 14,416 (51%)                                       |
| 3 COVID vaccine doses                | 23,108 (36%)           | 15,544 (38%)                                               | 17,388 (40%)                                      | 10,542 (37%)                                       |
| First booster                        | 266 (< 1%)             | 200 (< 1%)                                                 | 199 (< 1%)                                        | 136 (< 1%)                                         |

SD: standard deviation. Where necessary, to fulfill CPRD suppression rules of cells with 10 or fewer persons, categories are presented as percentages to prevent back-calculation.

ANDERSEN ET AL (2023)

PERSONS DIAGNOSED WITH COVID IN ENGLAND IN THE CPRD: A COHORT DESCRIPTION

**Supplemental file 1, Table 10: Characteristics of Hospitalized COVID Cases in CPRD Aurum-HES Linked Data, by High Risk Definitions**

|                                       | All<br>(n = 13,165) | Meeting NHS<br>Highest Risk<br>Conditions<br>(n = 4,333) | Meeting<br>PANORAMIC<br>Criteria<br>(n = 11,011) | Meeting<br>UKHSA<br>Clinical Risk<br>(n = 5,353) |
|---------------------------------------|---------------------|----------------------------------------------------------|--------------------------------------------------|--------------------------------------------------|
| Hospitalized cases meeting definition | --                  | 33%                                                      | 84%                                              | 41%                                              |
| Age, mean (SD)                        | 60 (16)             | 66 (14)                                                  | 65 (14)                                          | 66 (16)                                          |
| Sex                                   |                     |                                                          |                                                  |                                                  |
| Male                                  | 7,537 (57%)         | 2,242 (52%)                                              | 6,280 (57%)                                      | 2,804 (52%)                                      |
| Female                                | 5,628 (43%)         | 2,091 (48%)                                              | 4,731 (43%)                                      | 2,549 (48%)                                      |
| Unknown                               | 0                   | 0                                                        | 0                                                | 0                                                |
| General Practitioner Practice Region  |                     |                                                          |                                                  |                                                  |
| North East                            | 467 (4%)            | 172 (4%)                                                 | 397 (4%)                                         | 200 (4%)                                         |
| North West                            | 2,886 (22%)         | 962 (22%)                                                | 2,510 (23%)                                      | 1,263 (24%)                                      |
| Yorkshire and The Humber              | 340 (3%)            | 126 (3%)                                                 | 282 (3%)                                         | 156 (3%)                                         |
| East Midlands                         | 214 (2%)            | 73 (2%)                                                  | 182 (2%)                                         | 97 (2%)                                          |
| West Midlands                         | 2,065 (16%)         | 708 (16%)                                                | 1,739 (16%)                                      | 891 (17%)                                        |
| East of England                       | 414 (3%)            | 147 (3%)                                                 | 358 (3%)                                         | 175 (3%)                                         |
| London                                | 2,984 (23%)         | 943 (22%)                                                | 2,387 (22%)                                      | 1,105 (21%)                                      |
| South East                            | 2,682 (20%)         | 832 (19%)                                                | 2,235 (20%)                                      | 1,022 (19%)                                      |
| South West                            | 1,113 (8%)          | 370 (9%)                                                 | 921 (8%)                                         | 444 (8%)                                         |
| Unknown                               | 0                   | 0                                                        | 0                                                | 0                                                |
| Non-immunocompromised                 | 12,984              | 4,179                                                    | 10,832                                           | 5,208                                            |
| Unvaccinated                          | 12,744 (98%)        | 4,107 (98%)                                              | 10,602 (98%)                                     | 5,070 (97%)                                      |
| 1 COVID vaccine dose                  | 240 (2%)            | 72 (2%)                                                  | 230 (2%)                                         | 138 (3%)                                         |
| 2 COVID vaccine doses                 | 0                   | 0                                                        | 0                                                | 0                                                |
| First booster                         | 0                   | 0                                                        | 0                                                | 0                                                |
| Immunocompromised                     | 181                 | 154                                                      | 179                                              | 145                                              |
| Unvaccinated                          | 102 (56%)           | 89 (58%)                                                 | 100 (56%)                                        | 79 (54%)                                         |
| 1 COVID vaccine dose                  | 79 (44%)            | 65 (42%)                                                 | 79 (44%)                                         | 66 (46%)                                         |
| 2 COVID vaccine doses                 | 0                   | 0                                                        | 0                                                | 0                                                |
| 3 COVID vaccine doses                 | 0                   | 0                                                        | 0                                                | 0                                                |
| First booster                         | 0                   | 0                                                        | 0                                                | 0                                                |

SD: standard deviation.

1 Andersen et al (2023)

2 Classification as written in Green Book, chapter 14a

3  
4 Chronic respiratory disease – individuals with a severe lung condition: poorly controlled asthma, chronic  
5 obstructive pulmonary disease including chronic bronchitis and emphysema, bronchiectasis, cystic fibrosis,  
6 interstitial lung fibrosis, pneumoconiosis, bronchopulmonary dysplasia

7  
8 complications, chronic heart failure, individuals requiring regular medication and/or follow-up for ischaemic  
9 heart disease (includes individuals with atrial fibrillation, peripheral vascular disease or a history of venous  
10 thromboembolism)

11 Chronic kidney disease: at stage 3-5, chronic kidney failure, nephrotic syndrome, kidney transplantation

12 Chronic liver disease: chronic hepatitis, cirrhosis, biliary atresia

13  
14 function may be compromised due to neurological or neuromuscular disease (e.g. polio syndrome sufferers),  
15 cerebral palsy, severe or profound and multiple learning disabilities (PMLD) including all those on the  
16 learning disability register, Down's syndrome, multiple sclerosis, epilepsy, dementia, Parkinson's disease,  
17 motor neurone disease and related or similar conditions, hereditary and degenerative disease of the nervous  
18 system or muscles, severe neurological disability

19  
20 Diabetes mellitus and other endocrine disorders: any diabetes, diet controlled diabetes, current gestational  
21 diabetes, Addison's diabetes

22  
23 immunosuppression due to disease or treatment: patients undergoing chemotherapy leading to  
24 immunosuppression, patients undergoing radical radiotherapy, solid organ transplant recipients, bone  
25 marrow or stem cell transplant recipients, HIV infection at all stages, multiple myeloma or genetic disorders  
26 affecting the immune system (e.g. IRAK-4, NEMO, complement disorder, SCID), individuals who are receiving  
27 immunosuppressive or immunomodulating biological therapy including, but not limited to, anti-TNF,  
28 alemtuzumab, ofatumumab, rituximab, patients receiving protein kinase inhibitors or PARP inhibitors, and  
29 individuals treated with steroid sparing agents such as cyclophosphamide and mycophenolate mofetil,  
30 individuals treated with or likely to be treated with systemic steroids for more than a month at a dose  
31 equivalent to prednisolone at 20mg or more per day for adults, anyone with a history of haematological  
32 malignancy, including leukaemia, lymphoma, and myeloma, those who require long term  
33 immunosuppressive treatment for conditions including but not limited to: systemic lupus erythematosus,  
34 Asplenia or dysfunction of the spleen: asplenia, homozygous sickle cell disease, thalassaemia major, coeliac syn  
35 Morbid obesity (>40 kg/m<sup>2</sup>)

36 Severe mental illness: schizophrenia, bipolar disorder, any mental illness that causes severe functional impairn

37  
38 Pregnancy: pregnancy or end of pregnancy

39  
40  
41  
42 Description of sheet abbreviations:

43 hsa\_ to reflect UK Health Security Agency clinical risk criteria code list

44 \_XX\_ to reflect the concept

45 \_\_m to reflect medcodeid, \_icd to reflect ICD-10 codes, \_p to reflect procodeid or \_opcs to reflect OPCS proc

46  
47  
48 Format of sheets:

49 medcodeid and procodeid are stored as text, not integers, as per CPRD suggestions.



1  
2  
3 Medcodeid list ICD-10 code list Prodcodeid list OPCS code list  
4  
5  
6

7 hsa\_res\_m hsa\_res\_icd hsa\_res\_p X  
8  
9

10 hsa\_hv\_m hsa\_hv\_icd X X  
11

12 hsa\_ren\_m hsa\_ren\_icd X X  
13

14 hsa\_liv\_m hsa\_liv\_icd X X  
15  
16  
17  
18

19 hsa\_neu\_m hsa\_neu\_icd X X  
20

21 hsa\_dme\_m hsa\_dme\_icd X X  
22  
23  
24  
25  
26  
27  
28  
29  
30  
31  
32  
33

34  
35 hsa\_imm\_m hsa\_imm\_icd hsa\_imm\_p hsa\_imm\_opcs  
36

37 hsa\_asp\_m hsa\_asp\_icd X X  
38

39 hsa\_obe\_m hsa\_obe\_icd X X  
40

41 hsa\_pre\_m hsa\_pre\_m X X  
42  
43  
44  
45

46 e list  
47  
48  
49  
50  
51  
52  
53  
54  
55  
56  
57  
58  
59  
60

| 1  | Medcodeid         | Term                                                                |
|----|-------------------|---------------------------------------------------------------------|
| 2  | 105519017         | Chronic bronchitis                                                  |
| 3  | 123588010         | Mucopurulent chronic bronchitis                                     |
| 4  | 139979010         | Fetid chronic bronchitis                                            |
| 5  | 285104011         | Obstructive chronic bronchitis                                      |
| 6  | 301444018         | Simple chronic bronchitis NOS                                       |
| 7  | 301448015         | Mucopurulent chronic bronchitis NOS                                 |
| 8  | 301450011         | Chronic asthmatic bronchitis                                        |
| 9  | 301451010         | Chronic wheezy bronchitis                                           |
| 10 | 301455018         | Obstructive chronic bronchitis NOS                                  |
| 11 | 301456017         | Mixed simple and mucopurulent chronic bronchitis                    |
| 12 | 301457014         | Other chronic bronchitis                                            |
| 13 | 301458016         | Other chronic bronchitis NOS                                        |
| 14 | 301459012         | Chronic bronchitis NOS                                              |
| 15 | 506053014         | Purulent chronic bronchitis                                         |
| 16 | 508561017         | Simple chronic bronchitis                                           |
| 17 | 508562012         | Chronic catarrhal bronchitis                                        |
| 18 | 851261000006116   | Chronic bronchitis, acute exac                                      |
| 19 | 3873191000006110  | Fetid chronic bronchitis                                            |
| 20 | 4733031000006114  | Chronic obstructive bronchitis                                      |
| 21 | 7958721000006119  | Chronic suppuration of bronchus                                     |
| 22 | 8033221000006118  | Chronic obstructive lung disease co-occurrent with acute bronchitis |
| 23 | 8090191000006114  | Acute exacerbation of chronic obstructive bronchitis                |
| 24 | 13651461000006115 | Chronic bronchitis co-occurrent with wheeze                         |
| 25 | 7462014           | Subcutaneous emphysema                                              |
| 26 | 9337016           | Panlobular emphysema                                                |
| 27 | 19421011          | Interstitial pulmonary emphysema                                    |
| 28 | 27096010          | Giant bullous emphysema                                             |
| 29 | 53589018          | Acute emphysematous cholecystitis                                   |
| 30 | 90243017          | Traumatic subcutaneous emphysema                                    |
| 31 | 99889013          | Perinatal interstitial emphysema                                    |
| 32 | 113497011         | Centrilobular emphysema                                             |
| 33 | 285100019         | Emphysematous bronchitis                                            |
| 34 | 301460019         | Chronic bullous emphysema                                           |
| 35 | 301463017         | Segmental bullous emphysema                                         |
| 36 | 301464011         | Zonal bullous emphysema                                             |
| 37 | 301468014         | Chronic bullous emphysema NOS                                       |
| 38 | 301469018         | Other emphysema                                                     |
| 39 | 301470017         | Acute vesicular emphysema                                           |
| 40 | 301477019         | Emphysema NOS                                                       |
| 41 | 301572010         | Chronic emphysema due to chemical fumes                             |
| 42 | 301835010         | [X]Other emphysema                                                  |
| 43 | 316340019         | Perinatal interstitial emphysema and related conditions             |
| 44 | 316342010         | Perinatal interstitial emphysema or related condition NOS           |
| 45 | 396108018         | Bullous emphysema with collapse                                     |
| 46 | 396109014         | Atrophic (senile) emphysema                                         |
| 47 | 396110016         | Other emphysema NOS                                                 |
| 48 | 1230190015        | MacLeod's unilateral emphysema                                      |
| 49 | 640491000006111   | Pulmonary emphysema                                                 |
| 50 | 909721000006115   | [RFC] Emphysema                                                     |

|    |                   |                                                        |
|----|-------------------|--------------------------------------------------------|
| 1  |                   |                                                        |
| 2  | 2767261000006118  | Mediastinal emphysema                                  |
| 3  | 2767421000006111  | Obstructive emphysema                                  |
| 4  | 3013821000006114  | Subpleural emphysema                                   |
| 5  | 3228301000006115  | Unilateral emphysema                                   |
| 6  | 3295361000006115  | Emphysema                                              |
| 7  | 3589231000006114  | Congenital lobar emphysema                             |
| 8  | 3764021000006117  | Interstitial emphysema of lung                         |
| 9  | 3921361000006112  | Emphysema of lung                                      |
| 10 | 4374681000006116  | Chronic emphysema                                      |
| 11 | 4781461000006117  | Emphysematous bulla                                    |
| 12 | 5054271000006111  | Pulmonary emphysema in alpha-1 PI deficiency           |
| 13 | 7627141000006111  | Pulmonary emphysema co-occurrent with fibrosis of lung |
| 14 | 7627151000006113  | CPFE - combined pulmonary fibrosis and emphysema       |
| 15 | 14161371000006110 | Emphysema of left lung                                 |
| 16 | 14161381000006113 | Emphysema of right lung                                |
| 17 | 21163015          | Bronchiectasis                                         |
| 18 | 38677017          | Tuberculous bronchiectasis                             |
| 19 | 128792019         | Congenital bronchiectasis                              |
| 20 | 301524014         | Recurrent bronchiectasis                               |
| 21 | 301525010         | Post-infective bronchiectasis                          |
| 22 | 301526011         | Bronchiectasis NOS                                     |
| 23 | 1854831000006111  | Cystic fibrosis manifested by bronchiectasis           |
| 24 | 2404941000000118  | H/O: bronchiectasis                                    |
| 25 | 2806691000006111  | Traction bronchiectasis                                |
| 26 | 2867041000006113  | Post-tuberculous bronchiectasis                        |
| 27 | 3327421000006113  | Adult bronchiectasis                                   |
| 28 | 3858081000006116  | Cylindrical bronchiectasis                             |
| 29 | 5053671000006110  | Acquired bronchiectasis                                |
| 30 | 5053681000006113  | Idiopathic bronchiectasis                              |
| 31 | 5053691000006111  | Obstructive bronchiectasis                             |
| 32 | 14133001000006111 | Exacerbation of bronchiectasis caused by infection     |
| 33 | 24973018          | Bauxite fibrosis of lung                               |
| 34 | 29395011          | Graphite fibrosis of lung                              |
| 35 | 85960018          | Pulmonary fibrosis                                     |
| 36 | 149374011         | Tuberculous fibrosis of lung                           |
| 37 | 254002014         | O/E - fibrosis of lung                                 |
| 38 | 254003016         | O/E - fibrosis of lung present                         |
| 39 | 301575012         | Chronic pulmonary fibrosis due to chemical fumes       |
| 40 | 301852014         | [X]Other interstitial pulmonary diseases with fibrosis |
| 41 | 1225197013        | Pfeiffer's disease                                     |
| 42 | 207831000006116   | Interstitial pulmonary fibrosis of prematurity         |
| 43 | 211391000006118   | Post-inflammatory pulmonary fibrosis                   |
| 44 | 230471000006112   | Pfeiffer's disease                                     |
| 45 | 556271000006115   | Chronic radiation pulmonary fibrosis                   |
| 46 | 606441000006110   | Cystic fibrosis of the lung                            |
| 47 | 621121000006112   | Diffuse interstitial pulmonary fibrosis                |
| 48 | 885431000006115   | Radiation lung fibrosis                                |
| 49 | 885491000006116   | Pulmonary fibrosis                                     |
| 50 | 909731000006117   | [RFC] Pulmonary fibrosis                               |
| 51 | 1786131000006116  | Idiopathic pulmonary fibrosis                          |

|    |                   |                                                          |
|----|-------------------|----------------------------------------------------------|
| 1  |                   |                                                          |
| 2  | 2732761000006118  | Bauxite fibrosis of lung                                 |
| 3  | 3154151000006111  | Massive silicotic fibrosis of lung                       |
| 4  | 3336391000006117  | Fibrosis of lung                                         |
| 5  | 3423211000006118  | Massive fibrosis of lung                                 |
| 6  | 3657901000006117  | Fibrosis of lung following radiation                     |
| 7  | 3907561000006119  | Pulmonary cystic fibrosis                                |
| 8  | 5054951000006111  | Localised pulmonary fibrosis                             |
| 9  | 7059121000006115  | Familial idiopathic pulmonary fibrosis                   |
| 10 | 7532731000006111  | Chronic idiopathic pulmonary fibrosis                    |
| 11 | 7635751000006118  | Acute idiopathic pulmonary fibrosis                      |
| 12 | 13777461000006118 | Fibrosis of lung caused by radiation                     |
| 13 | 37941013          | Asbestosis                                               |
| 14 | 49227017          | Coal workers' pneumoconiosis                             |
| 15 | 83019014          | Complicated silicosis                                    |
| 16 | 121482015         | Talc pneumoconiosis                                      |
| 17 | 301552017         | Asbestosis NOS                                           |
| 18 | 301556019         | Silica pneumoconiosis NOS                                |
| 19 | 301557011         | Pneumoconiosis due to inorganic dust                     |
| 20 | 301558018         | Pneumoconiosis due to inorganic dust NOS                 |
| 21 | 301562012         | Pneumoconiosis                                           |
| 22 | 301563019         | Pneumoconiosis associated with tuberculosis              |
| 23 | 301838012         | [X]Pneumoconiosis due to other dust containing silica    |
| 24 | 301839016         | [X]Pneumoconiosis due to other specified inorganic dusts |
| 25 | 350121013         | Pleural plaque disease due to asbestosis                 |
| 26 | 141591000006118   | Silica and silicate pneumoconiosis                       |
| 27 | 219651000006116   | Pneumoconioses                                           |
| 28 | 885331000006110   | Coalworker's pneumoconiosis                              |
| 29 | 907501000006111   | [RFC] Pneumoconiosis                                     |
| 30 | 2511231000006117  | Pneumoconiosis due to silica                             |
| 31 | 2860341000006111  | Asbestos pneumoconiosis                                  |
| 32 | 2860351000006113  | Pulmonary asbestosis                                     |
| 33 | 3513801000006119  | Iron pneumoconiosis                                      |
| 34 | 3689711000006118  | Pneumoconiosis due to talc                               |
| 35 | 5055241000006116  | Complicated pneumoconiosis                               |
| 36 | 500770015         | Perinatal bronchopulmonary dysplasia                     |
| 37 | 1079231000006110  | Adverse reaction to Bdp                                  |
| 38 | 3598991000006113  | Bronchopulmonary dysplasia of newborn                    |
| 39 | 3599001000006113  | Bronchopulmonary dysplasia                               |
| 40 | 3599031000006117  | BPD - Bronchopulmonary dysplasia                         |
| 41 | 11932331000006115 | copd gold group a                                        |
| 42 | 11932341000006113 | copd gold group b                                        |
| 43 | 11932351000006110 | copd gold group c                                        |
| 44 | 11932361000006112 | copd gold group d                                        |
| 45 | 1222334016        | other specified chronic obstructive pulmonary disease    |
| 46 | 1222335015        | chronic obstructive pulmonary disease nos                |
| 47 | 12489801000006116 | admit copd emergency                                     |
| 48 | 12728161000006116 | chronic obstructive airways disease nos                  |
| 49 | 12759361000006112 | chronic obstructive pulmonary disease nos                |
| 50 | 1488423019        | chronic obstructive pulmonary disease follow-up          |
| 51 | 1488424013        | chronic obstructive pulmonary disease annual review      |

|    |                  |                                                                                  |
|----|------------------|----------------------------------------------------------------------------------|
| 1  |                  |                                                                                  |
| 2  | 1494601017       | coad follow-up                                                                   |
| 3  | 1683181000000112 | chronic obstructive pulmonary disease 3 monthly review                           |
| 4  | 1683221000000119 | chronic obstructive pulmonary disease 6 monthly review                           |
| 5  | 1699821000006113 | at risk of chronic obstructive pulmonary diseas exacerbation                     |
| 6  | 1765681000000110 | history of chronic obstructive pulmonary disease                                 |
| 7  | 1771201000006116 | chronic obstructive pulmonary disease multidisciplinary review                   |
| 8  | 1783891000006115 | chronic obstructiv pulmonary disease medication optimisation                     |
| 9  | 1811661000006110 | copd self-management plan agreed                                                 |
| 10 | 1811741000006117 | copd self-management plan review                                                 |
| 11 | 1823851000006119 | chronic obstructive pulmonary disease confirmed                                  |
| 12 | 1823851000006119 | chronic obstructive pulmonary disease confirmed                                  |
| 13 | 1823851000006119 | chronic obstructive pulmonary disease confirmed                                  |
| 14 | 1882421000006113 | 1 copd exacerbation in past year                                                 |
| 15 | 1882431000006111 | 3+ copd exacerbations in past year                                               |
| 16 | 1882441000006118 | 2 copd exacerbations in past year                                                |
| 17 | 1882451000006116 | no copd exacerbations in past year                                               |
| 18 | 1948051000006112 | asthma-chronic obstructive pulmonary disease overlap syndrom                     |
| 19 | 2009451000006113 | chronic obstructive pulmonary disease post discharge review                      |
| 20 | 2009451000006113 | chronic obstructive pulmonary disease post discharge review                      |
| 21 | 2010061000006113 | acute non-infective exacerbation of chronic obstructive pulmonary disease        |
| 22 | 2152091000000112 | has chronic obstructive pulmonary disease care plan                              |
| 23 | 301539010        | other specified chronic obstructive airways disease                              |
| 24 | 301539010        | other specified chronic obstructive airways disease                              |
| 25 | 301545019        | chronic obstructive airways disease nos                                          |
| 26 | 301836011        | [x]other specified chronic obstructive pulmonary disease                         |
| 27 | 516801000000112  | very severe chronic obstructive pulmonary disease                                |
| 28 | 553211000006119  | chron obstruct pulmonary dis wth acute exacerbation, unspec                      |
| 29 | 555461000006119  | chronic obstruct pulmonary dis with acute lower resp infectn                     |
| 30 | 555461000006119  | chronic obstruct pulmonary dis with acute lower resp infectn                     |
| 31 | 555471000006114  | chronic obstructive airways disease                                              |
| 32 | 6763231000006119 | emergency hospital admission for chronic obstructive pulmonary disease           |
| 33 | 6763251000006114 | emergency hospital admission for copd (chronic obstructive pulmonary disease)    |
| 34 | 8058301000006110 | copd (chronic obstructive pulmonary disease) disturbs sleep                      |
| 35 | 8058321000006117 | copd (chronic obstructive pulmonary disease) does not disturb sleep              |
| 36 | 8125721000006119 | at risk of copd (chronic obstructive pulmonary disease) exacerbation             |
| 37 | 8125721000006119 | at risk of copd (chronic obstructive pulmonary disease) exacerbation             |
| 38 | 8235101000006114 | copd (chronic obstructive pulmonary disease) 3 monthly review                    |
| 39 | 8235131000006118 | copd (chronic obstructive pulmonary disease) 6 monthly review                    |
| 40 | 8260631000006112 | copd (chronic obstructive pulmonary disease) self-management plan review         |
| 41 | 8260631000006112 | copd (chronic obstructive pulmonary disease) self-management plan review         |
| 42 | 8287171000006115 | acute non-infective exacerbation of copd (chronic obstructive pulmonary disease) |
| 43 | 909711000006111  | [rfc] chronic obstructive pulmonary disease (copd)                               |
| 44 | 9317341000006115 | acos - asthma-chronic obstructive pulmonary disease overlap syndrome             |
| 45 | 966841000006111  | chronic obstructive pulmonary disease clini management plan                      |
| 46 | 977891000006112  | copd accident and emergency attendance since last visit                          |
| 47 | 977901000006111  | emergency copd admission since last appointment                                  |
| 48 | 977901000006111  | emergency copd admission since last appointment                                  |
| 49 | 977911000006114  | number of copd exacerbations in past year                                        |
| 50 | 990641000006110  | chronic obst. pulm. dis. nos                                                     |
| 51 | 990651000006112  | chr. airway obstruction nos                                                      |
| 52 | 998281000006115  | multiple copd emergency hospital admissions                                      |
| 53 |                  |                                                                                  |
| 54 |                  |                                                                                  |
| 55 |                  |                                                                                  |
| 56 |                  |                                                                                  |
| 57 |                  |                                                                                  |
| 58 |                  |                                                                                  |
| 59 |                  |                                                                                  |
| 60 |                  |                                                                                  |

1  
2  
3  
4  
5  
6  
7  
8  
9  
10  
11  
12  
13  
14  
15  
16  
17  
18  
19  
20  
21  
22  
23  
24  
25  
26  
27  
28  
29  
30  
31  
32  
33  
34  
35  
36  
37  
38  
39  
40  
41  
42  
43  
44  
45  
46  
47  
48  
49  
50  
51  
52  
53  
54  
55  
56  
57  
58  
59  
60

For peer review only

1  
2  
3  
4  
5  
6  
7  
8  
9  
10  
11  
12  
13  
14  
15  
16  
17  
18  
19  
20  
21  
22  
23  
24  
25  
26  
27  
28  
29  
30  
31  
32  
33  
34  
35  
36  
37  
38  
39  
40  
41  
42  
43  
44  
45  
46  
47  
48  
49  
50  
51  
52  
53  
54  
55  
56  
57  
58  
59  
60

For peer review only

1  
2  
3  
4  
5  
6  
7  
8  
9  
10  
11  
12  
13  
14  
15  
16  
17  
18  
19  
20  
21  
22  
23  
24  
25  
26  
27  
28  
29  
30  
31  
32  
33  
34  
35  
36  
37  
38  
39  
40  
41  
42  
43  
44  
45  
46  
47  
48  
49  
50  
51  
52  
53  
54  
55  
56  
57  
58  
59  
60

For peer review only



1  
2  
3  
4  
5  
6  
7  
8  
9  
10  
11  
12  
13  
14  
15  
16  
17  
18  
19  
20  
21  
22  
23  
24  
25  
26  
27  
28  
29  
30  
31  
32  
33  
34  
35  
36  
37  
38  
39  
40  
41  
42  
43  
44  
45  
46  
47  
48  
49  
50  
51  
52  
53  
54  
55  
56  
57  
58  
59  
60

For peer review only

e)

|    | ICD-10 code | Term                                                                         |
|----|-------------|------------------------------------------------------------------------------|
| 1  |             |                                                                              |
| 2  |             |                                                                              |
| 3  | J41         | Simple and mucopurulent chronic bronchitis                                   |
| 4  | J41.0       | Simple chronic bronchitis                                                    |
| 5  | J41.1       | Mucopurulent chronic bronchitis                                              |
| 6  |             |                                                                              |
| 7  | J41.8       | Mixed simple and mucopurulent chronic bronchitis                             |
| 8  | J42         | Unspecified chronic bronchitis                                               |
| 9  | J43         | Emphysema                                                                    |
| 10 | J43.0       | MacLeod syndrome                                                             |
| 11 | J43.1       | Panlobular emphysema                                                         |
| 12 | J43.2       | Centrilobular emphysema                                                      |
| 13 | J43.8       | Other emphysema                                                              |
| 14 | J43.9       | Emphysema, unspecified                                                       |
| 15 | J47         | Bronchiectasis                                                               |
| 16 |             |                                                                              |
| 17 | J63.1       | Bauxite fibrosis (of lung)                                                   |
| 18 | J63.3       | Graphite fibrosis (of lung)                                                  |
| 19 | J84.1       | Other interstitial pulmonary diseases with fibrosis                          |
| 20 | J60         | Coalworker pneumoconiosis                                                    |
| 21 | J61         | Pneumoconiosis due to asbestos and other mineral fibres                      |
| 22 | J62         | Pneumoconiosis due to dust containing silica                                 |
| 23 | J62.0       | Pneumoconiosis due to talc dust                                              |
| 24 | J62.8       | Pneumoconiosis due to other dust containing silica                           |
| 25 | J63         | Pneumoconiosis due to other inorganic dusts                                  |
| 26 | J63.8       | Pneumoconiosis due to other specified inorganic dusts                        |
| 27 | J64         | Unspecified pneumoconiosis                                                   |
| 28 | J65         | Pneumoconiosis associated with tuberculosis                                  |
| 29 | P27.1       | Bronchopulmonary dysplasia originating in the perinatal period               |
| 30 | J44         | Other chronic obstructive pulmonary disease                                  |
| 31 | J44.0       | Chronic obstructive pulmonary disease with acute lower respiratory infection |
| 32 | J44.1       | Chronic obstructive pulmonary disease with acute exacerbation, unspecified   |
| 33 | J44.8       | Other specified chronic obstructive pulmonary disease                        |
| 34 | J44.9       | Chronic obstructive pulmonary disease, unspecified                           |
| 35 |             |                                                                              |
| 36 |             |                                                                              |
| 37 |             |                                                                              |
| 38 |             |                                                                              |
| 39 |             |                                                                              |
| 40 |             |                                                                              |
| 41 |             |                                                                              |
| 42 |             |                                                                              |
| 43 |             |                                                                              |
| 44 |             |                                                                              |
| 45 |             |                                                                              |
| 46 |             |                                                                              |
| 47 |             |                                                                              |
| 48 |             |                                                                              |
| 49 |             |                                                                              |
| 50 |             |                                                                              |
| 51 |             |                                                                              |
| 52 |             |                                                                              |
| 53 |             |                                                                              |
| 54 |             |                                                                              |
| 55 |             |                                                                              |
| 56 |             |                                                                              |
| 57 |             |                                                                              |
| 58 |             |                                                                              |
| 59 |             |                                                                              |
| 60 |             |                                                                              |

| 1  | Prodcoid          | Term                                                                       |
|----|-------------------|----------------------------------------------------------------------------|
| 2  | 2372241000033111  | *Cortisone Acetate Granules                                                |
| 3  | 2372541000033113  | *Cortisone Acetate Pills (Sucrose)                                         |
| 4  | 2372141000033116  | *Cortisone Acetate Tablets                                                 |
| 5  | 2509441000033112  | *Prednisolone Granules                                                     |
| 6  | 2509741000033117  | *Prednisolone Pills (Sucrose)                                              |
| 7  | 2509341000033118  | *Prednisolone Tablets                                                      |
| 8  | 12633641000033114 | Alkindi 0.5mg granules in capsules for opening (Diurnal Ltd)               |
| 9  | 12633741000033117 | Alkindi 1mg granules in capsules for opening (Diurnal Ltd)                 |
| 10 | 12633841000033110 | Alkindi 2mg granules in capsules for opening (Diurnal Ltd)                 |
| 11 | 12633941000033119 | Alkindi 5mg granules in capsules for opening (Diurnal Ltd)                 |
| 12 | 144641000033113   | Betamethasone 500microgram soluble tablets sugar free                      |
| 13 | 145441000033110   | Betamethasone 500microgram tablets                                         |
| 14 | 143041000033117   | Betnelan 500microgram tablets (Focus Pharmaceuticals Ltd)                  |
| 15 | 144841000033114   | Betnesol 500microgram soluble tablets (Focus Pharmaceuticals Ltd)          |
| 16 | 371941000033113   | Cortisone 25mg tablets                                                     |
| 17 | 375741000033113   | Cortisone Acetate Tablets 25 mg                                            |
| 18 | 369541000033110   | Cortisone Acetate Tablets 5 mg                                             |
| 19 | 372041000033119   | Cortisone Tablets 5 mg                                                     |
| 20 | 430841000033118   | Decadron 500microgram tablets (Merck Sharp & Dohme Ltd)                    |
| 21 | 5497541000033111  | Decadron Elixir 500 micrograms/5 ml                                        |
| 22 | 429141000033119   | Decortisyl Tablets 5 mg                                                    |
| 23 | 431541000033114   | Deltacortril 2.5mg gastro-resistant tablets (Alliance Pharmaceuticals Ltd) |
| 24 | 431641000033110   | Deltacortril 5mg gastro-resistant tablets (Alliance Pharmaceuticals Ltd)   |
| 25 | 429441000033110   | Deltastab Tablets 1 mg                                                     |
| 26 | 429541000033111   | Deltastab Tablets 5 mg                                                     |
| 27 | 9122441000033114  | Dexamethasone 10mg/5ml oral solution sugar free                            |
| 28 | 10213841000033110 | Dexamethasone 20mg/5ml oral solution sugar free                            |
| 29 | 11072141000033115 | Dexamethasone 2mg soluble tablets sugar free                               |
| 30 | 431841000033111   | Dexamethasone 2mg tablets                                                  |
| 31 | 2146541000033118  | Dexamethasone 2mg/5ml oral solution sugar free                             |
| 32 | 12398241000033119 | Dexamethasone 40mg tablets                                                 |
| 33 | 11072241000033110 | Dexamethasone 4mg soluble tablets sugar free                               |
| 34 | 5506241000033117  | Dexamethasone 4mg tablets                                                  |
| 35 | 431941000033115   | Dexamethasone 500microgram tablets                                         |
| 36 | 5900841000033112  | Dexamethasone 500micrograms/5ml oral solution                              |
| 37 | 5900941000033116  | Dexamethasone 500micrograms/5ml oral suspension                            |
| 38 | 5900641000033111  | Dexamethasone 5mg/5ml oral solution                                        |
| 39 | 5900741000033119  | Dexamethasone 5mg/5ml oral suspension                                      |
| 40 | 11072341000033117 | Dexamethasone 8mg soluble tablets sugar free                               |
| 41 | 12575941000033114 | Dexamethasone 8mg tablets                                                  |
| 42 | 429841000033113   | Dexamethasone Tablets 250 micrograms                                       |
| 43 | 2146441000033119  | Dexsol 2mg/5ml oral solution (Rosemont Pharmaceuticals Ltd)                |
| 44 | 8494441000033110  | Dilacort 2.5mg gastro-resistant tablets (Crescent Pharma Ltd)              |
| 45 | 8494541000033111  | Dilacort 5mg gastro-resistant tablets (Crescent Pharma Ltd)                |
| 46 | 12389541000033113 | Glenzoludex 2mg soluble tablets (Glenmark Pharmaceuticals Europe Ltd)      |
| 47 | 12389641000033114 | Glenzoludex 4mg soluble tablets (Glenmark Pharmaceuticals Europe Ltd)      |
| 48 | 12389741000033117 | Glenzoludex 8mg soluble tablets (Glenmark Pharmaceuticals Europe Ltd)      |
| 49 | 12890041000033114 | Hydrocortisone 10mg soluble tablets sugar free                             |
| 50 | 744541000033116   | Hydrocortisone 10mg tablets                                                |

|    |                   |                                                                     |
|----|-------------------|---------------------------------------------------------------------|
| 1  |                   |                                                                     |
| 2  | 740241000033111   | Hydrocortisone 10mg/5ml oral suspension                             |
| 3  | 12633341000033118 | Hydrocortisone 1mg granules in capsules for opening                 |
| 4  | 8142041000033116  | Hydrocortisone 20mg modified-release tablets                        |
| 5  | 742241000033110   | Hydrocortisone 20mg tablets                                         |
| 6  |                   |                                                                     |
| 7  | 2149441000033113  | Hydrocortisone 25mg/5ml oral suspension                             |
| 8  | 12633441000033112 | Hydrocortisone 2mg granules in capsules for opening                 |
| 9  | 12633241000033111 | Hydrocortisone 500microgram granules in capsules for opening        |
| 10 | 12633541000033113 | Hydrocortisone 5mg granules in capsules for opening                 |
| 11 | 8141941000033110  | Hydrocortisone 5mg modified-release tablets                         |
| 12 |                   |                                                                     |
| 13 | 1830141000033115  | Hydrocortisone 5mg/5ml oral suspension                              |
| 14 | 2623741000033116  | Hydrocortisone 5mg/5ml oral suspension sugar free                   |
| 15 | 744641000033115   | Hydrocortone 10mg tablets (Auden McKenzie (Pharma Division) Ltd)    |
| 16 | 744741000033112   | Hydrocortone 20mg tablets (Auden McKenzie (Pharma Division) Ltd)    |
| 17 | 5990641000033113  | Lodotra 1mg modified-release tablets (Napp Pharmaceuticals Ltd)     |
| 18 | 5990741000033116  | Lodotra 2mg modified-release tablets (Napp Pharmaceuticals Ltd)     |
| 19 | 5990841000033114  | Lodotra 5mg modified-release tablets (Napp Pharmaceuticals Ltd)     |
| 20 |                   |                                                                     |
| 21 | 6512741000033110  | Martapan 2mg/5ml oral solution (Martindale Pharmaceuticals Ltd)     |
| 22 | 898441000033115   | Medrone 100mg tablets (Pfizer Ltd)                                  |
| 23 | 899641000033110   | Medrone 16mg tablets (Pfizer Ltd)                                   |
| 24 | 899741000033118   | Medrone 2mg tablets (Pfizer Ltd)                                    |
| 25 | 899841000033111   | Medrone 4mg tablets (Pfizer Ltd)                                    |
| 26 | 898541000033119   | Methylprednisolone 100mg tablets                                    |
| 27 | 903141000033113   | Methylprednisolone 16mg tablets                                     |
| 28 | 904141000033111   | Methylprednisolone 2mg tablets                                      |
| 29 | 904241000033116   | Methylprednisolone 4mg tablets                                      |
| 30 |                   |                                                                     |
| 31 | 12398341000033112 | Neofordex 40mg tablets (Aspire Pharma Ltd)                          |
| 32 | 10212641000033118 | Pevanti 10mg tablets (Advanz Pharma)                                |
| 33 | 10212441000033115 | Pevanti 2.5mg tablets (Advanz Pharma)                               |
| 34 | 10212741000033110 | Pevanti 20mg tablets (Advanz Pharma)                                |
| 35 | 10212941000033113 | Pevanti 25mg tablets (Advanz Pharma)                                |
| 36 | 10212541000033119 | Pevanti 5mg tablets (Advanz Pharma)                                 |
| 37 |                   |                                                                     |
| 38 | 8142241000033112  | Plenadren 20mg modified-release tablets (Shire Pharmaceuticals Ltd) |
| 39 | 8142141000033117  | Plenadren 5mg modified-release tablets (Shire Pharmaceuticals Ltd)  |
| 40 | 1137241000033115  | Precortisyl Forte Tablets 25 mg                                     |
| 41 | 1137041000033111  | Precortisyl Tablets 1 mg                                            |
| 42 | 1137141000033110  | Precortisyl Tablets 5 mg                                            |
| 43 | 1137341000033113  | Prednesol Soluble tablets 5 mg                                      |
| 44 | 10212141000033111 | Prednisolone 10mg tablets                                           |
| 45 | 10494341000033117 | Prednisolone 10mg/ml oral solution sugar free                       |
| 46 | 9119141000033118  | Prednisolone 15mg/5ml oral solution                                 |
| 47 | 11507841000033115 | Prednisolone 1mg gastro-resistant tablets                           |
| 48 | 1131741000033117  | Prednisolone 1mg tablets                                            |
| 49 | 1114241000033116  | Prednisolone 2.5mg gastro-resistant tablets                         |
| 50 | 1131841000033110  | Prednisolone 2.5mg tablets                                          |
| 51 | 10212341000033114 | Prednisolone 20mg tablets                                           |
| 52 | 1130741000033110  | Prednisolone 25mg tablets                                           |
| 53 | 11664841000033116 | Prednisolone 30mg tablets                                           |
| 54 | 1114341000033114  | Prednisolone 5mg gastro-resistant tablets                           |
| 55 | 1127341000033111  | Prednisolone 5mg soluble tablets                                    |
| 56 | 1131941000033119  | Prednisolone 5mg tablets                                            |
| 57 |                   |                                                                     |
| 58 |                   |                                                                     |
| 59 |                   |                                                                     |
| 60 |                   |                                                                     |

1  
2 10266841000033117 Prednisolone 5mg/5ml oral solution unit dose  
3 10988941000033111 Prednisolone Dompe Oral solution 5 mg/5 ml unit dose  
4 1130841000033117 Prednisolone Steaglate Tablets 6.65 mg  
5 5990141000033115 Prednisone 1mg modified-release tablets  
6 5990241000033110 Prednisone 2mg modified-release tablets  
7 5990341000033117 Prednisone 5mg modified-release tablets  
8  
9  
10  
11  
12  
13  
14  
15  
16  
17  
18  
19  
20  
21  
22  
23  
24  
25  
26  
27  
28  
29  
30  
31  
32  
33  
34  
35  
36  
37  
38  
39  
40  
41  
42  
43  
44  
45  
46  
47  
48  
49  
50  
51  
52  
53  
54  
55  
56  
57  
58  
59  
60

For peer review only

1  
2 Medcodeid  
3 43850011  
4 60444016  
5 90135019  
6 107545013  
7 109700019  
8 110659019  
9 143003017  
10 146259010  
11 299650019  
12 299654011  
13 299655012  
14 299673010  
15 299675015  
16 350517010  
17 411508017  
18 504901000006118  
19 728671000006119  
20 741661000006118  
21 741681000006111  
22 741691000006114  
23 741701000006114  
24 789941000006117  
25 884131000006114  
26 905451000006118  
27 1749291000006113  
28 2297871000000111  
29 2297911000000113  
30 2297951000000112  
31 2297991000000116  
32 2674471000006117  
33 3244761000006113  
34 3552501000006119  
35 3654631000006113  
36 5057801000006113  
37 5590581000006114  
38 6214751000006112  
39 7052811000006113  
40 7501601000006111  
41 7501711000006118  
42 13941061000006111  
43 13941071000006116  
44 7360241000006116  
45 82343012  
46 119481012  
47 251698019  
48 256478018  
49 256485019  
50 300130013  
51 300132017

For peer review only

1 300133010  
2 300134016  
3 350465014  
4 421235014  
5 456154015  
6 1488912012  
7 2674487014  
8 2675253013  
9 376541000000117  
10 385221000000110  
11 386991000000110  
12 636701000000115  
13 636721000000112  
14 783761000006118  
15 1547561000006113  
16 1547571000006118  
17 1547611000006111  
18 1701641000006111  
19 1810721000006117  
20 1823951000006111  
21 1905451000006118  
22 2006271000006112  
23 2309761000000114  
24 2309851000000115  
25 2805631000006119  
26 2805651000006114  
27 3063041000006112  
28 3299911000006116  
29 3679061000006111  
30 3679071000006116  
31 5046721000006110  
32 5046731000006113  
33 5046751000006118  
34 5057261000006110  
35 5669591000006113  
36 5669601000006117  
37 5669611000006119  
38 5887651000006116  
39 6016401000006115  
40 6043781000006115  
41 7064691000006118  
42 7101091000006119  
43 7152861000006115  
44 7185061000006114  
45 7254921000006110  
46 7261781000006116  
47 7275691000006117  
48 7292711000006116  
49 7338801000006111  
50 7375931000006117

For peer review only

1  
2 7428901000006112  
3 7455581000006115  
4 7594061000006119  
5 7594071000006114  
6 7610331000006110  
7 7731461000006119  
8 8021691000006116  
9 8037691000006113  
10 8316981000006114  
11 8439861000006115  
12 14161691000006115  
13 173401000006114  
14 173421000006116  
15 30273012  
16 64466019  
17 87208017  
18 98484016  
19 118689010  
20 129661016  
21 135665013  
22 158317012  
23 216205019  
24 251689017  
25 296931015  
26 296938014  
27 296939018  
28 296940016  
29 296947018  
30 296948011  
31 296949015  
32 296950015  
33 296951016  
34 297138017  
35 299742017  
36 300234010  
37 300312010  
38 300321011  
39 300503012  
40 300533017  
41 300534011  
42 300535012  
43 300536013  
44 300537016  
45 300538014  
46 300539018  
47 300540016  
48 300541017  
49 300542012  
50 300543019  
51 300547018  
52  
53  
54  
55  
56  
57  
58  
59  
60

For peer review only



1  
2 300550015  
3 300552011  
4 300553018  
5 300554012  
6 300555013  
7 300556014  
8 300557017  
9 300558010  
10 300559019  
11 300561011  
12 300562016  
13 300563014  
14 300564015  
15 300672010  
16 300673017  
17 300674011  
18 300676013  
19 300677016  
20 300681016  
21 300691010  
22 300692015  
23 300695018  
24 300696017  
25 300697014  
26 300704016  
27 300710016  
28 300711017  
29 300712012  
30 300713019  
31 300964011  
32 302984016  
33 304527018  
34 304536019  
35 305585018  
36 307739018  
37 307740016  
38 307741017  
39 307742012  
40 307747018  
41 307749015  
42 307750015  
43 307780013  
44 307781012  
45 307782017  
46 307815016  
47 307832017  
48 307833010  
49 307834016  
50 307838018  
51 307861016  
52  
53  
54  
55  
56  
57  
58  
59  
60

For peer review only

1  
2 307862011  
3 307866014  
4 307867017  
5 307868010  
6 307869019  
7 307871019  
8 307872014  
9 325205013  
10 345723011  
11 350892013  
12 395794011  
13 395795012  
14 395796013  
15 395801015  
16 395803017  
17 398450017  
18 411540018  
19 412645018  
20 419640012  
21 437622013  
22 449993015  
23 451478017  
24 451479013  
25 452963015  
26 453210011  
27 494431010  
28 495552014  
29 497563011  
30 497564017  
31 503317010  
32 1227369013  
33 1235655012  
34 1235913017  
35 1786197015  
36 1786198013  
37 2162148012  
38 2162149016  
39 2162422011  
40 2534187010  
41 2675439010  
42 2675878019  
43 2695366017  
44 2795114019  
45 3505881015  
46 3511086012  
47 3511955015  
48 3511959014  
49 3636257010  
50 3636258017  
51 1980100006110  
52  
53  
54  
55  
56  
57  
58  
59  
60

For peer review only

1  
2 19831000006119  
3 19841000006112  
4 19851000006114  
5 19861000006111  
6 19871000006116  
7  
8 19881000006118  
9 24951000006110  
10 24981000006119  
11 24991000006116  
12 100681000006116  
13 100691000006118  
14 100701000006118  
15 100721000006111  
16 100771000006112  
17 100811000006112  
18 100821000006116  
19 200961000006116  
20 211691000006114  
21 215511000000110  
22 216571000006116  
23 217601000000119  
24 218541000000116  
25 218551000000118  
26 231561000006110  
27 238581000006112  
28 238621000006112  
29 238651000006115  
30 268641000006113  
31 268671000006117  
32 269411000006115  
33 269431000006114  
34 269441000006116  
35 358041000000114  
36 359731000000112  
37 359871000000116  
38 420621000006111  
39 491241000006118  
40 542251000006112  
41 586241000006116  
42 632111000000118  
43 632731000006118  
44 638821000006113  
45 638871000006114  
46 801981000006111  
47 851241000006115  
48 866221000006112  
49 884141000006116  
50 884631000006118  
51 884641000006111  
52 884651000006113

For peer review only

1  
2 884731000006110  
3 884751000006115  
4 888681000006112  
5 888691000006110  
6 888731000006119  
7 905491000006112  
8 909471000006114  
9 989221000006110  
10 1119161000000115  
11 1545591000006112  
12 1548401000006112  
13 1549761000006110  
14 1729331000006116  
15 1786921000006116  
16 1848121000006110  
17 2144741000000111  
18 2168741000000113  
19 2210381000000117  
20 2234371000000119  
21 2234411000000115  
22 2234541000000115  
23 2238261000000112  
24 2238301000000119  
25 2238341000000116  
26 2488341000000112  
27 2488381000000116  
28 2608401000000118  
29 2730141000006117  
30 2751261000006119  
31 2765831000006118  
32 2784341000006116  
33 2784351000006119  
34 2837981000006113  
35 2838001000006118  
36 2856061000006119  
37 2892651000006119  
38 3123551000006116  
39 3215871000006116  
40 3244261000006119  
41 3308951000006115  
42 3331521000006116  
43 3345371000006113  
44 3414341000006115  
45 3414351000006118  
46 3439701000006113  
47 3439711000006111  
48 3462921000006119  
49 3553621000006119  
50 3614311000006116  
51 3648381000006112  
52  
53  
54  
55  
56  
57  
58  
59  
60

For peer review only

1 3648391000006110  
2 3745871000006116  
3 3756351000006111  
4 3767281000006116  
5 3865591000006112  
6 3870981000006117  
7 3918361000006110  
8 3932731000006114  
9 3962581000006110  
10 3978101000006118  
11 4056781000006117  
12 4056971000006118  
13 4056981000006115  
14 4059051000006119  
15 4374441000006113  
16 4403261000006113  
17 4540551000006119  
18 4785671000006113  
19 5011651000006111  
20 5011661000006113  
21 5014411000006111  
22 5014421000006115  
23 5049421000006111  
24 5049471000006112  
25 5050621000006118  
26 5051301000006111  
27 5057591000006116  
28 5057621000006119  
29 5057651000006111  
30 5057661000006113  
31 5059251000006117  
32 5059271000006110  
33 5059301000006112  
34 5059321000006119  
35 5233761000006119  
36 5477661000006119  
37 5560171000006116  
38 5593331000006113  
39 5593341000006115  
40 5653441000006111  
41 5836921000006114  
42 5836951000006117  
43 5886741000006110  
44 5912511000006114  
45 5992311000006119  
46 6018491000006111  
47 6018501000006115  
48 6348261000006111  
49 6348271000006116  
50 6348281000006118

For peer review only

1  
2 6348291000006115  
3 6601121000006118  
4 6601131000006115  
5 6694741000006111  
6 6694751000006113  
7 6694761000006110  
8 6694771000006115  
9 7070211000006112  
10 7078581000006116  
11 7078591000006118  
12 7078601000006114  
13 7095381000006112  
14 7098321000006117  
15 7218941000006118  
16 7273741000006119  
17 7598991000006116  
18 7599001000006116  
19 7609581000006110  
20 7617181000006110  
21 7699481000006113  
22 7848701000006116  
23 7966351000006118  
24 7967281000006119  
25 8041571000006119  
26 8041581000006116  
27 8041601000006114  
28 8042101000006112  
29 8042511000006119  
30 8044851000006112  
31 8361011000006114  
32 8361031000006115  
33 9652981000006114  
34 12027691000006119  
35 12107671000006115  
36 12107691000006119  
37 12122311000006110  
38 12126121000006117  
39 12126161000006111  
40 12126841000006116  
41 12127261000006118  
42 12127301000006110  
43 13949481000006113  
44 14164461000006112  
45 14164481000006119  
46 14194181000006111  
47 14194871000006117  
48 1705016  
49 22613011  
50 39767019  
51 89332015

For peer review only

1  
2 100438013  
3 104563015  
4 111625010  
5 145328019  
6 145620019  
7 251691013  
8 256451015  
9 294491014  
10 297013012  
11 299570018  
12 299572014  
13 299573016  
14 299630018  
15 299633016  
16 299634010  
17 299636012  
18 299637015  
19 299723016  
20 299750014  
21 299776014  
22 299800012  
23 299804015  
24 299805019  
25 299834013  
26 299835014  
27 299848013  
28 299851018  
29 299853015  
30 300374018  
31 300379011  
32 300401011  
33 300402016  
34 300403014  
35 300418010  
36 300419019  
37 300436010  
38 300510018  
39 300514010  
40 300515011  
41 300861019  
42 300867015  
43 300876010  
44 300879015  
45 300884014  
46 300886011  
47 300932016  
48 300944018  
49 300963017  
50 304524013  
51 304537011  
52  
53  
54  
55  
56  
57  
58  
59  
60

For peer review only

1  
2 313444015  
3 350535018  
4 355548016  
5 355549012  
6 377172018  
7  
8 395756011  
9 395791015  
10 397829016  
11 400805012  
12 411904010  
13 451368019  
14 451372015  
15 451376017  
16 459488019  
17 459859010  
18 477999016  
19 2534664018  
20 2534674015  
21 2536393012  
22 2537480011  
23 2675255018  
24 39111000006114  
25 52981000006112  
26 149701000006118  
27 161591000006114  
28 223951000000112  
29 235911000006116  
30 370711000006115  
31 371021000006118  
32 394541000006112  
33 407291000006117  
34 410751000006118  
35 417171000006111  
36 424291000006117  
37 426481000006114  
38 480631000006119  
39 496981000006113  
40 496991000006111  
41 585631000000113  
42 634751000006116  
43 635641000006111  
44 800691000006113  
45 818521000006112  
46 883951000006115  
47 883981000006111  
48 884101000006118  
49 884161000006117  
50 884181000006110  
51 884201000006111  
52 884211000006114

For peer review only



1 884611000006112  
2 884621000006116  
3 905361000006110  
4 905441000006115  
5 906771000006113  
6 908791000006113  
7 968201000006114  
8 989111000006113  
9 1130181000000113  
10 1539331000006118  
11 1823891000006113  
12 1895641000006114  
13 2115181000000110  
14 2504421000006117  
15 2709711000006116  
16 2941981000006112  
17 3013481000006111  
18 3182531000006110  
19 3268641000006118  
20 3302691000006119  
21 3302731000006110  
22 3371381000006110  
23 3371411000006113  
24 3371421000006117  
25 3522701000006112  
26 4776031000006115  
27 4777241000006117  
28 4778311000006112  
29 5011861000006114  
30 5057981000006111  
31 5496991000006110  
32 5974561000006110  
33 6633851000006110  
34 6841231000006113  
35 6841391000006118  
36 6847761000006118  
37 6860251000006115  
38 6860261000006118  
39 6864781000006110  
40 7084801000006112  
41 7475721000006114  
42 7482951000006115  
43 7573181000006118  
44 7573211000006119  
45 7703511000006110  
46 8015271000006112  
47 8026081000006119  
48 12321891000006112  
49 13944851000006115  
50 14015031000006119

For peer review only

1  
2 14196331000006118  
3 22613011  
4 76377011  
5 77703015  
6 80189019  
7  
8 313400018  
9 313403016  
10 313423015  
11 313424014  
12 313427019  
13 313439010  
14 313444015  
15 313448017  
16 315680013  
17 315686019  
18 316833010  
19 355549012  
20 377170014  
21 377172018  
22 377798017  
23 400805012  
24 400815018  
25 3527478013  
26 371771000006115  
27 580911000006114  
28 580921000006118  
29 580931000006115  
30 580941000006113  
31 580951000006110  
32 580961000006112  
33 580971000006117  
34 581261000006110  
35 582721000006116  
36 583181000006114  
37 583791000006113  
38 637121000000110  
39 905361000006110  
40 905441000006115  
41 968201000006114  
42 1547441000006113  
43 2709701000006119  
44 2709711000006116  
45 3268641000006118  
46 3285001000006119  
47 3339391000006110  
48 3371411000006113  
49 4824961000006118  
50 5327651000006111  
51 7475721000006114  
52 12126011000006114  
53  
54  
55  
56  
57  
58  
59  
60

For peer review only

1  
2 12321891000006112  
3 18472010  
4 70653017  
5 94251011  
6 139475013  
7 139482012  
8 147247018  
9 206703015  
10 251680018  
11 299673010  
12 300179017  
13 300180019  
14 300217019  
15 305601017  
16 317955011  
17 324974014  
18 324975010  
19 325061011  
20 350484012  
21 395772015  
22 412678013  
23 451426015  
24 453099015  
25 493287011  
26 510016018  
27 1488804017  
28 2549208013  
29 2675255018  
30 223981000000118  
31 504901000006118  
32 504911000006115  
33 728671000006119  
34 728681000006116  
35 741681000006111  
36 741691000006114  
37 741701000006114  
38 789941000006117  
39 905391000006119  
40 1647701000000118  
41 1661371000000112  
42 1747691000006119  
43 2227501000000110  
44 2352391000000117  
45 2504341000006116  
46 2585431000006117  
47 2660881000006116  
48 2664351000006113  
49 3182541000006117  
50 3182551000006115  
51 3182561000006118

For peer review only

1  
2 3213831000006118  
3 3244761000006113  
4 3283871000006117  
5 3489281000006119  
6 3589241000006116  
7 3868341000006118  
8 3886041000006118  
9 3886061000006119  
10 4193361000006119  
11 4540521000006111  
12 6043761000006113  
13 6204381000006117  
14 6914191000006115  
15 6919191000006119  
16 7025691000006110  
17 7052811000006113  
18 7056281000006118  
19 7250571000006113  
20 7251291000006119  
21 7321121000006119  
22 7507301000006110  
23 7510341000006110  
24 7573171000006116  
25 7573181000006118  
26 7573191000006115  
27 7573201000006117  
28 7573211000006119  
29 8011111000006111  
30 8030311000006111  
31 8048061000006111  
32 13910671000006110  
33 13971301000006111  
34 14015051000006114  
35  
36  
37  
38  
39  
40  
41  
42  
43  
44  
45  
46  
47  
48  
49  
50  
51  
52  
53  
54  
55  
56  
57  
58  
59  
60

For peer review only

## 1 Term

2 Pulmonary arterial hypertension  
3 Benign hypertensive heart disease  
4 Malignant hypertensive heart disease  
5 Hypertensive heart disease  
6 Benign hypertensive heart AND renal disease  
7 Malignant hypertensive heart AND renal disease  
8 Hypertensive heart AND renal disease  
9 Secondary pulmonary hypertension  
10 Malignant hypertensive heart disease NOS  
11 Benign hypertensive heart disease NOS  
12 Hypertensive heart disease NOS  
13 Hypertensive heart and renal disease with renal failure  
14 Hypertensive heart and renal disease NOS  
15 Thromboembolic pulmonary hypertension  
16 Cardiomegaly - hypertensive  
17 Benign hypertensive heart disease with congestive cardiac failure  
18 Malignant hypertensive heart disease with congestive cardiac failure  
19 Hypertensive heart disease NOS  
20 Hypertensive heart disease NOS with CCF  
21 Hypertensive heart disease NOS without CCF  
22 Hypertensive heart and renal disease with (congestive) heart failure  
23 Hypertensive heart and renal disease with both (congestive) heart failure and renal failure  
24 Hypertensive renal + heart dis  
25 [RFC] Pulmonary embolism/pulmonary hypertension  
26 Thromboembolic pulmonary hypertension  
27 Pulmonary arterial hypertension drugs Band 1  
28 Pulmonary arterial hypertension drugs Band 2  
29 Pulmonary arterial hypertension drugs Band 3  
30 Pulmonary arterial hypertension drugs Band 4  
31 Progressive pulmonary hypertension  
32 Hypertensive heart failure  
33 Hypertensive cardiopathy  
34 Pulmonary hypertension  
35 Chronic thromboembolic pulmonary hypertension  
36 Pulmonary hypertension with occult mitral stenosis  
37 Pulmonary hypertension secondary to raised pulmonary vascular resistance  
38 Right heart failure due to pulmonary hypertension  
39 Precapillary pulmonary hypertension  
40 Pulmonary arterial hypertension associated with connective tissue disease  
41 Mild pulmonary hypertension  
42 Moderate pulmonary hypertension  
43 Double outlet right ventricle with subpulmonary ventricular septal defect  
44 Atrial fibrillation  
45 Ventricular fibrillation  
46 H/O ventricular fibrillation  
47 ECG: atrial fibrillation  
48 ECG: ventricular fibrillation  
49 Atrial fibrillation and flutter  
50 Atrial fibrillation and flutter NOS

1  
2 Ventricular fibrillation and flutter  
3 Ventricular fibrillation and flutter NOS  
4 Non-rheumatic atrial fibrillation  
5 Paroxysmal atrial fibrillation  
6 H/O: atrial fibrillation  
7  
8 Implantation of internal cardiac defibrillator  
9 External ventricular defibrillation  
10 Chronic atrial fibrillation  
11 Cardioverter defibrillator introduced through the vein  
12 Replacement of cardioverter defibrillator  
13 Cardioverter defibrillator introduced through the vein NOS  
14 Persistent atrial fibrillation  
15 Permanent atrial fibrillation  
16 Implantation of intravenous pacemaker for atrial fibrillation  
17 Implantation of cardioverter defibrillator with one electrode lead  
18 Implantation of cardioverter defibrillator with two electrode leads  
19 Other specified cardioverter defibrillator intro thr vein  
20 Implantation of cardioverter defibrillator using three electrode leads  
21 Combination internal cardiac defibrillator and pacemaker in situ  
22 Atrial fibrillation confirmed  
23 Cardioverter defibrillator procedure  
24 Cardiac resynchronisation therapy defibrillator device in situ  
25 Implantation of subcutaneous cardioverter defibrillator  
26 Renewal of subcutaneous cardioverter defibrillator  
27 Defibrillator  
28 Defibrillator, device  
29 Revision of automatic implantable cardioverter/defibrillator  
30 AF - Atrial fibrillation  
31 Implantable defibrillator  
32 Implantable defibrillator, device  
33 Automatic defibrillator procedure  
34 ICD - Internal cardiac defibrillator procedure  
35 Implantation of automatic cardiac defibrillator  
36 Lone atrial fibrillation  
37 AF - Paroxysmal atrial fibrillation  
38 PAF - Paroxysmal atrial fibrillation  
39 Intermittent atrial fibrillation  
40 Controlled atrial fibrillation  
41 History of atrial fibrillation  
42 Rapid atrial fibrillation  
43 Transient cerebral ischaemia due to atrial fibrillation  
44 History of combination internal cardiac defibrillator and pacemaker  
45 Insertion of cardiac defibrillator using fluoroscopic guidance  
46 Insertion of cardiac biventricular implantable cardioverter defibrillator (ICD) using fluoroscopic guidance  
47 Cardiac defibrillator in situ  
48 Implantation of cardioverter defibrillator with three electrode leads  
49 Automatic implantable cardiac defibrillator in situ  
50 Insertion of single chamber pacing cardioverter defibrillator pulse generator  
51 Insertion of biventricular implantable cardioverter defibrillator  
52 Insertion of pacemaker for control of atrial fibrillation

1 Single-chamber implantable defibrillator  
2 Dual-chamber implantable defibrillator  
3 Cardiac resynchronisation therapy implantable defibrillator  
4 Cardiac resynchronization therapy implantable defibrillator  
5 Longstanding persistent atrial fibrillation  
6 Familial atrial fibrillation  
7 Biventricular automatic implantable cardioverter defibrillator in situ  
8 Atrial fibrillation with rapid ventricular response  
9 Replacement of subcutaneous cardioverter defibrillator  
10 Atrial fibrillation detected  
11 Paroxysmal atrial fibrillation with rapid ventricular response  
12 Replace aneurys fem art by fem/peron a anast c vein graf NEC  
13 Replace aneurys pop art by pop/peron a anast c vein graf NEC  
14 Portal vein thrombosis  
15 Hepatic vein thrombosis  
16 Thromboangiitis obliterans  
17 Pulmonary embolism  
18 Cerebral thrombosis  
19 Thrombotic thrombocytopenic purpura  
20 Thrombotic microangiopathy  
21 Renal artery thrombosis  
22 Deep vein thrombosis of leg related to air travel  
23 H/O: Deep Vein Thrombosis  
24 Phlebitis and thrombophlebitis of intracranial sinuses  
25 Thrombosis of superior longitudinal sinus  
26 Thrombosis transverse sinus  
27 Thrombosis of central nervous system venous sinus NOS  
28 Thrombophlebitis of central nervous system venous sinuses  
29 Thrombophlebitis of cavernous sinus  
30 Thrombophlebitis of superior longitudinal venous sinus  
31 Thrombophlebitis lateral venous sinus  
32 Thrombophlebitis of central nervous system venous sinus NOS  
33 Myelopathy due to arterial thrombosis of spinal cord  
34 Coronary thrombosis not resulting in myocardial infarction  
35 Atrial thrombosis  
36 Cerebral infarct due to thrombosis of precerebral arteries  
37 Cerebral infarction due to thrombosis of cerebral arteries  
38 Thromboangiitis obliterans NOS  
39 Embolism and thrombosis of the thoracic aorta  
40 Embolism and thrombosis of an arm or leg artery  
41 Embolism and thrombosis of the brachial artery  
42 Embolism and thrombosis of the radial artery  
43 Embolism and thrombosis of the ulnar artery  
44 Embolism and thrombosis of an arm artery NOS  
45 Embolism and thrombosis of the femoral artery  
46 Embolism and thrombosis of the popliteal artery  
47 Embolism and thrombosis of the anterior tibial artery  
48 Embolism and thrombosis of the dorsalis pedis artery  
49 Embolism and thrombosis of the posterior tibial artery  
50 Embolism and thrombosis of a leg artery NOS

1 Peripheral arterial embolism and thrombosis NOS  
2 Embolism and thrombosis of other specified artery  
3 Embolism and/or thrombosis of the common iliac artery  
4 Embolism and/or thrombosis of the internal iliac artery  
5 Embolism and/or thrombosis of the external iliac artery  
6 Embolism and thrombosis of the iliac artery unspecified  
7 Embolism and thrombosis of the subclavian artery  
8 Embolism and thrombosis of the splenic artery  
9 Embolism and thrombosis of the axillary artery  
10 Embolism and thrombosis of the coeliac artery  
11 Embolism and thrombosis of the hepatic artery  
12 Embolism and thrombosis of other arteries NOS  
13 Arterial embolism and thrombosis NOS  
14 Thrombophlebitis of the femoral vein  
15 Thrombophlebitis of the popliteal vein  
16 Thrombophlebitis of the anterior tibial vein  
17 Thrombophlebitis of the posterior tibial vein  
18 Thrombophlebitis of deep veins of lower extremity  
19 Deep vein phlebitis and thrombophlebitis of the leg NOS  
20 Thrombophlebitis of the common iliac vein  
21 Thrombophlebitis of the internal iliac vein  
22 Thrombophlebitis of the external iliac vein  
23 Thrombophlebitis of iliac vein  
24 Phlebitis and thrombophlebitis of the iliac vein NOS  
25 Thromboembolism of vein  
26 Embolism and thrombosis of the vena cava  
27 Embolism and thrombosis of the renal vein  
28 Other embolism and thrombosis  
29 Embolism and thrombosis NOS  
30 [X]Embolism and thrombosis of other arteries  
31 Thrombosis of mesenteric vein  
32 Scrotal thrombosis  
33 Male genital thrombosis NOS  
34 Pulmonary embolism following abortive pregnancy  
35 Antenatal deep vein thrombosis unspecified  
36 Antenatal deep vein thrombosis - delivered  
37 Antenatal deep vein thrombosis with antenatal complication  
38 Antenatal deep vein thrombosis NOS  
39 Postnatal deep vein thrombosis unspecified  
40 Postnatal deep vein thrombosis with postnatal complication  
41 Postnatal deep vein thrombosis NOS  
42 Obstetric cerebral venous thrombosis  
43 Cerebral venous thrombosis in pregnancy  
44 Cerebral venous thrombosis in the puerperium  
45 Obstetric pulmonary embolism  
46 Obstetric blood-clot pulmonary embolism  
47 Obstetric blood-clot pulmonary embolism unspecified  
48 Obstetric blood-clot pulmonary embolism - delivered  
49 Obstetric blood-clot pulmonary embolism NOS  
50 Other obstetric pulmonary embolism unspecified



1 Other obstetric pulmonary embolism - delivered  
2 Other obstetric pulmonary embolism NOS  
3 Obstetric pulmonary embolism NOS  
4 Obstetric pulmonary embolism NOS, unspecified  
5 Obstetric pulmonary embolism NOS - delivered  
6 Obstetric pulmonary embolism NOS with antenatal complication  
7 Obstetric pulmonary embolism NOS with postnatal complication  
8 Thromboembolism after infusion  
9 Anterior spinal artery thrombosis  
10 Arteriovenous fistula thrombosis  
11 Arterial embolic and thrombotic occlusion  
12 Arterial embolus and thrombosis  
13 Embolism and thrombosis of the abdominal aorta  
14 Deep vein phlebitis and thrombophlebitis of the leg  
15 Venous thrombosis  
16 Other obstetric pulmonary embolism  
17 H/O: thrombosis  
18 Phlebitis and/or thrombophlebitis of iliac vein  
19 Thrombosis of inferior vena cava  
20 Axillary vein thrombosis  
21 Thrombosis of renal artery bypass graft  
22 H/O: Deep vein thrombosis  
23 [V] Personal history of pulmonary embolism  
24 Right ventricular thrombosis  
25 Thrombosis of vein of leg  
26 Retinal vein thrombosis  
27 Antenatal deep vein thrombosis  
28 Postnatal deep vein thrombosis  
29 DVT - deep venous thrombosis, postnatal  
30 Penis vein thrombosis  
31 [V] Personal history DVT (deep vein thrombosis)  
32 Mural thrombosis  
33 Cerebral vein thrombosis  
34 Coronary thrombosis  
35 Thrombosis - coronary  
36 Deep vein thrombosis  
37 Deep venous thrombosis  
38 Deep vein thrombosis of lower limb  
39 Deep vein thrombosis of leg related to intravenous drug use  
40 Pulmonary thromboendarterectomy  
41 Percutaneous transluminal thrombolysis of artery  
42 Transjugular intrahepatic thrombolysis of portal vein  
43 Thrombosis of subclavian vein  
44 Right middle cerebral artery thrombosis  
45 Thrombosis of right vertebral artery  
46 Thrombosis of right middle cerebral artery  
47 Thrombosis of left middle cerebral artery  
48 Iliac vein thrombosis  
49 Thrombosis of iliac vein  
50 Other phlebitis and thrombosis in pregnancy and puerperium

1 Other phlebitis/thrombosis in preg/puerperium + a/n comp  
2 Other phlebitis/thrombosis in preg/puerperium + p/n comp  
3 Other phlebitis/thrombosis in preg/puerperium -del +p/n comp  
4 Other phlebitis/thrombosis in pregnancy and puerperium NOS  
5 Other phlebitis/thrombosis in pregnancy/puerperium - deliv  
6 Other phlebitis/thrombosis in pregnancy/puerperium unsp  
7 Other obstetric pulmonary embolism - delivered + p/n comp  
8 Other obstetric pulmonary embolism with antenatal comp  
9 Other obstetric pulmonary embolism with postnatal comp  
10 Thrombosis of atrium, auricular appendage, and ventricle as current complications following acute myocardial  
11 Cerebral venous thrombosis of cavernous sinus  
12 Thrombosis lateral sinus  
13 Cerebral venous sinus thrombosis  
14 Carotid artery thrombosis  
15 Superior mesenteric artery thrombosis  
16 Superior mesenteric vein thrombosis  
17 Puerperal thrombosis NOS  
18 Postnatal deep vein thrombosis - delivered with postnatal complication  
19 Mesenteric thrombosis  
20 Postoperative deep vein thrombosis  
21 H/O: thromboembolism  
22 Arterial thrombosis  
23 Deep vein thrombosis, leg  
24 Phlebitis or thrombophlebitis of CNS venous sinus NOS  
25 Percutaneous transluminal coronary thrombolytic using streptokinase  
26 Percutaneous transluminal thrombolysis of femoral graft using streptokinase  
27 Percutaneous transluminal coronary thrombolysis using streptokinase  
28 Obstetric pulmonary embolism NOS  
29 Obstetric pulmonary embolism NOS - delivered with p/n comp  
30 Obstetric blood-clot pulmonary embolism - delivered with postnatal complication  
31 Obstetric blood-clot pulmonary embolism with antenatal complication  
32 Obstetric blood-clot pulmonary embolism with postnatal complication  
33 Percutaneous transluminal venous thrombolysis NEC  
34 Percutaneous mechanical thromboembolectomy  
35 Percutaneous aspiration thromboembolectomy  
36 [X]Phlebitis+thrombophlebitis/oth deep vessls/low extremities  
37 Arterial embolism and thrombosis  
38 Cerebral infarction due to cerebral venous thrombosis, non-pyogenic  
39 Non-pyogenic venous sinus thrombosis  
40 Recurrent pulmonary embolism  
41 Antenatal DVT  
42 Embolism and thrombosis NOS  
43 Embolism and thrombosis of other and unspec parts aorta  
44 Gestational thrombosis NOS  
45 Axillary vein thrombosis  
46 Thromboendarterectomy  
47 Coronary thrombosis  
48 Arterial embolism/thrombosis  
49 Embolus/thrombosis abd. aorta  
50 Embolus/thrombosis aorta NOS

1  
2 Deep venous thrombosis - leg  
3 Venous thrombosis NOS  
4 Antepartum DVT  
5 Postpartum DVT  
6 Obstetrical pulmonary embolism  
7 [RFC] Venous thrombosis  
8 [RFC] Deep vein thrombosis  
9 Deep venous thrombosis - leg  
10 Deep vein thrombosis of peroneal vein  
11 Percutaneous transluminal thrombolysis of blood vessel of liver  
12 Percutaneous transluminal thrombolysis and reconstruction of artery  
13 Percutaneous transluminal venous thrombolysis with reconstruction  
14 Cerebral venous thrombosis  
15 Recurrent deep vein thrombosis  
16 Thrombosis of stent of renal artery  
17 Recurrent deep vein thrombosis  
18 Postthrombotic syndrome  
19 Thrombosis of dialysis vascular access  
20 Thrombosis of internal jugular vein  
21 Thrombosis of external jugular vein  
22 Thrombosis of artery of transplanted kidney  
23 Thrombosis of dialysis arteriovenous graft  
24 Thrombosis of dialysis arteriovenous fistula  
25 Thrombosis of dialysis arteriovenous shunt  
26 Unprovoked deep vein thrombosis  
27 Provoked deep vein thrombosis  
28 Perianal venous thrombosis  
29 Splenic vein thrombosis  
30 Renal vein thrombosis  
31 Deep thrombophlebitis  
32 Deep vein thrombosis of portal vein  
33 PVT - Portal vein thrombosis  
34 Thrombosis of lateral venous sinus  
35 Cerebral venous thrombosis of lateral sinus  
36 Thrombosed varices  
37 Branch retinal vein thrombosis  
38 Hepatic vein thrombosis  
39 Thrombosis of corpus cavernosum  
40 Thrombosis of retinal vein  
41 Antepartum deep vein thrombosis  
42 Thrombolysis  
43 Femoral artery thrombosis  
44 Postpartum deep phlebothrombosis  
45 Postpartum deep vein thrombosis  
46 Pulmonary artery thrombosis  
47 Pulmonary arterial thrombosis  
48 PE - Pulmonary embolism  
49 Vertebral artery thrombosis  
50 CRVT - Central retinal vein thrombosis  
51 Thrombosis of superior sagittal sinus

1 Sagittal sinus thrombosis  
2 Thrombosis of penile vein  
3 Thrombotic infarction  
4 Pulmonary vein thrombosis  
5 Hepatic artery thrombosis  
6 Thrombosis of abdominal aorta  
7 Popliteal artery thrombosis  
8 Basilar artery thrombosis  
9 Thrombosis of cavernous venous sinus  
10 Thrombosis of arteries of lower extremity  
11 Thrombosis of pelvic vein  
12 Thrombosis of cerebral veins  
13 Cerebral venous thrombosis  
14 Thrombosis of renal artery  
15 Thrombosed aneurysm  
16 DVT - Deep vein thrombosis  
17 History of deep vein thrombosis  
18 Deep venous thrombosis of the superior mesenteric vein  
19 Cerebral venous thrombosis of sigmoid sinus  
20 Cerebral venous thrombosis of cortical vein  
21 Thrombolysis of intracranial vessel  
22 Percutaneous thrombolysis of intracranial artery  
23 Thrombolysis of artery  
24 Percutaneous thrombolysis of common femoral artery  
25 Thrombolysis of vein  
26 Thrombolysis of arteriovenous fistula  
27 Pulmonary thromboembolism  
28 Acute massive pulmonary embolism  
29 Subacute massive pulmonary embolism  
30 SAMPE - Subacute massive pulmonary embolism  
31 Inferior mesenteric vein thrombosis  
32 Thrombosis of vein of lower leg  
33 Iliofemoral deep vein thrombosis  
34 Iliofemoral deep vein thrombosis  
35 Blood clot in eye  
36 Thrombosis  
37 Aortic thromboembolism  
38 Percutaneous thrombolysis of artery  
39 Percutaneous thrombolysis of vein  
40 Brachiocephalic vein thrombosis  
41 Subclavian artery thrombosis  
42 Intracranial venous thrombosis  
43 Digital arterial thrombosis  
44 Septic thrombophlebitis of sagittal sinus  
45 Thrombosis of vein of lower limb  
46 Thrombosis of vein of trunk  
47 Venous thrombosis, phlebitis and thrombophlebitis  
48 Thromboembolic disorder  
49 Thromboembolism  
50 Thromboembolic disease

1  
2 Thrombotic stroke  
3 Coronary artery thrombosis  
4 CT - Coronary thrombosis  
5 Deep venous thrombosis of lower extremity  
6 DVT - Deep vein thrombosis of lower limb  
7  
8 Deep venous thrombosis of leg  
9 Deep venous thrombosis of lower limb  
10 Thrombosis of ulnar artery  
11 Deep venous thrombosis of deep femoral vein  
12 Thrombosis of the popliteal vein  
13 Deep venous thrombosis of the popliteal vein  
14 History of thromboembolism of vein  
15 Venous thromboembolic disease  
16 Thrombosis  
17  
18 Deep venous thrombosis of peroneal vein  
19 Thrombosis of middle cerebral artery  
20 Cerebral infarction due to thrombosis of middle cerebral artery  
21 Acute pulmonary embolism  
22 Chronic pulmonary thromboembolism  
23 Pulmonary embolism on long-term anticoagulation therapy  
24 Acute occlusion of artery of lower limb co-occurrent and due to thromboembolus  
25 Acute deep vein thrombosis of lower limb  
26 Pulmonary embolism with pulmonary infarction  
27 Acute deep venous thrombosis  
28 Acute deep venous thrombosis of femoral vein  
29 Acute deep venous thrombosis of ileofemoral vein  
30 Chronic pulmonary embolism  
31 Acute deep venous thrombosis of internal jugular vein  
32 History of recurrent deep vein thrombosis  
33 Unprovoked DVT (deep vein thrombosis)  
34 Provoked DVT (deep vein thrombosis)  
35 Thrombosis of arm  
36 LVAD (left ventricular assist device) thrombosis  
37 Chronic deep vein thrombosis of left iliac vein  
38 Acute deep vein thrombosis of left iliac vein  
39 Acute thrombosis of superficial vein of bilateral upper limbs  
40 Right iliac artery thrombosis  
41 Splenic artery thrombosis  
42 Left common femoral artery thrombosis  
43 Thrombophlebitis of right jugular vein  
44 Chronic venous thrombosis  
45 Deep vein thrombosis of lower extremity due to intravenous drug use  
46 Thromboembolus of artery of upper limb  
47 Thromboembolus of artery of lower limb  
48 Acute DVT (deep vein thrombosis) of left peroneal vein  
49 Acute DVT (deep vein thrombosis) of right peroneal vein  
50 Valvular heart disease  
51 Congenital heart disease  
52 Rheumatic heart disease  
53 Atherosclerotic heart disease

1 Thyrotoxic heart disease  
2 Cerebrovascular disease  
3 Acute pulmonary heart disease  
4 Chronic rheumatic heart disease  
5 Chronic pulmonary heart disease  
6 H/O: heart disease NOS  
7 ECG: myocardial ischaemia NOS  
8 Polycythaemia due to cyanotic heart disease  
9 Cerebral degeneration due to cerebrovascular disease  
10 Other acute rheumatic heart disease  
11 Other acute rheumatic heart disease NOS  
12 Acute rheumatic heart disease  
13 Other specified chronic rheumatic heart disease  
14 Other and unspecified rheumatic heart disease  
15 Rheumatic heart disease unspecified  
16 Other rheumatic heart disease NOS  
17 Chronic rheumatic heart disease NOS  
18 Other acute and subacute ischaemic heart disease  
19 Other acute and subacute ischaemic heart disease NOS  
20 Chronic ischaemic heart disease  
21 Other specified chronic ischaemic heart disease  
22 Other specified chronic ischaemic heart disease NOS  
23 Other chronic ischaemic heart disease NOS  
24 Other specified ischaemic heart disease  
25 Ischaemic heart disease NOS  
26 Acute pulmonary heart disease NOS  
27 Other chronic pulmonary heart disease  
28 Other chronic pulmonary heart disease NOS  
29 Other cerebrovascular disease  
30 Generalised ischaemic cerebrovascular disease NOS  
31 Other cerebrovascular disease OS  
32 Other cerebrovascular disease NOS  
33 Late effects of cerebrovascular disease  
34 Other specified cerebrovascular disease  
35 Cerebrovascular disease NOS  
36 Arteriosclerotic vascular disease NOS  
37 Other specified peripheral vascular disease  
38 Other specified peripheral vascular disease NOS  
39 Peripheral vascular disease NOS  
40 [X]Other acute rheumatic heart disease  
41 [X]Other specified rheumatic heart diseases  
42 [X]Other forms of acute ischaemic heart disease  
43 [X]Other forms of chronic ischaemic heart disease  
44 [X]Other specified pulmonary heart diseases  
45 Heart disease  
46 [X]Cardiovascular disease, unspecified  
47 [X]Other specified cerebrovascular diseases  
48 [X]Other specified peripheral vascular diseases  
49 Male genital organ vascular diseases  
50 Male genital vascular diseases NOS

1 Acyanotic congenital heart disease NOS  
2 Peripheral ischaemic vascular disease  
3 Heart disease during pregnancy  
4 Congenital heart disease in pregnancy  
5 Congenital heart disease, septal and bulbar anomalies  
6 Chronic pulmonary heart disease NOS  
7 Other peripheral vascular disease  
8 H/O: cardiovascular disease  
9 Cyanotic congenital heart disease  
10 Aspirin prophylaxis for ischaemic heart disease  
11 H/O: cerebrovascular disease  
12 H/O: Treatment for ischaemic heart disease  
13 H/O: Peripheral vascular disease procedure  
14 Transient myocardial ischaemia  
15 Asymptomatic coronary heart disease  
16 Renal vascular disease  
17 Ischaemic heart disease  
18 Chronic myocardial ischaemia  
19 Arteriosclerotic heart disease  
20 IHD - Ischaemic heart disease  
21 Congestive heart failure due to valvular disease  
22 Other acute and subacute ischaemic heart disease  
23 On Warfarin and aspirin - IHD prophylaxis  
24 Sequelae/other + unspecified cerebrovascular diseases  
25 Sarcoid heart disease  
26 Heart diseases  
27 Peripheral vascular disease  
28 [X]Cerebrovascular diseases  
29 [X]Chronic rheumatic heart disease  
30 [X]Ischaemic heart diseases  
31 [X]Other cerebrovascular disorders in diseases CE  
32 [X]Other heart disorders in other diseases CE  
33 [X]Other vascular syndroms/brain in cerebrovasculr diseases  
34 [X]Pulmon heart disease & diseases of pulmonary circulation  
35 [X]Sequelae/other + unspecified cerebrovascular diseases  
36 Amyloid heart muscle disease  
37 Arteriosclerotic vascular disease  
38 Atherosclerotic cardiovascular disease  
39 Emergency hospital admission for ischaemic heart disease  
40 ECG myocardial ischaemia  
41 ECG:shows myocardial ischaemia  
42 Diffuse cerebrovascular disease  
43 Heart disease - pulmonary  
44 Acute RH. heart disease NOS  
45 Chronic rheumatic heart diseas  
46 Rheumatic heart disease NOS  
47 Acute/subacute IHD NOS  
48 Pulmonary heart disease  
49 Pulmonary heart disease NOS  
50 Other pulmonary heart disease

1  
2 Peripheral vasc. disease NOS  
3 Peripheral vasc. disease NOS  
4 [RFC] Chronic heart disease (CHD)  
5 [RFC] Congenital heart disease  
6 [RFC] Peripheral vascular disease  
7 [RFC] Coronary heart disease  
8 Mental retardation, congenital heart disease, blepharophimosis, blepharoptosis and hypoplastic teeth  
9  
10 Rheumatic heart disease NOS  
11 Small vessel cerebrovascular disease  
12 H/O: coronary heart disease  
13 Coronary heart disease confirmed  
14 On coronary heart disease register  
15 Coronary microvascular disease  
16 Heart valve disease  
17 CHD - Congenital heart disease  
18 Vascular disease  
19 Cardiovascular renal disease  
20 Congestive heart disease  
21 Coloboma, congenital heart disease, choanal atresia, growth retardation, genital hypoplasia, ear and hearing a  
22 Cardiovascular disease  
23 CVD - cardiovascular disease  
24 CAD - Coronary artery disease  
25 CHD - Coronary heart disease  
26 Coronary heart disease  
27 CVD - Cerebrovascular disease  
28 Ischaemic heart disease - angina  
29 Sarcoid heart muscle disease  
30 Sequelae of cerebrovascular disease  
31 Asymptomatic cerebrovascular disease  
32 Peripheral ischemic vascular disease  
33 History of cardiovascular disease  
34 History of treatment for ischaemic heart disease  
35 PVD-peripheral vascular disease  
36 Acute ischaemic heart disease  
37 Acute myocardial ischaemia  
38 Chronic ischemic heart disease  
39 Ischemic heart disease  
40 IHD - Ischemic heart disease  
41 Myocardial ischaemia  
42 Mixed myocardial ischaemia and infarction  
43 Heart failure due to end stage congenital heart disease  
44 History of peripheral vascular disease  
45 Heart failure with reduced ejection fraction due to coronary artery disease  
46 Heart failure with reduced ejection fraction due to heart valve disease  
47 Subacute ischaemic heart disease  
48 Peripheral vascular disease associated with another disorder  
49 Visual disturbance as sequela of cerebrovascular disease  
50 Intellectual disability, congenital heart disease, blepharophimosis, blepharoptosis and hypoplastic teeth  
51 Peripheral arterial vascular disease  
52 Myocardial infarction due to demand ischaemia



1 Pulmonary heart disease  
2 Congenital heart disease  
3 Congenital cardiospasm  
4 Congenital heart block  
5 Congenital cardiomegaly  
6 Congenital heart block, unspecified  
7 Congenital heart block NOS  
8 Congenital anomaly of myocardium  
9 Congenital aneurysm of heart  
10 Congenital epicardial cyst  
11 Congenital anomaly of heart valve  
12 Acyanotic congenital heart disease NOS  
13 Congenital heart anomaly NOS  
14 [X]Other congenital malformations of cardiac septa  
15 [X]Other specified congenital malformations of the heart  
16 Congenital cardiac failure  
17 Congenital heart disease in pregnancy  
18 Congenital insufficiency of heart valve NEC  
19 Congenital heart disease, septal and bulbar anomalies  
20 Congenital absence of pericardium  
21 Cyanotic congenital heart disease  
22 Congenital anomaly of cardiovascular system  
23 Congenital conductive hearing loss  
24 [X]Congenital malforms of cardiac chambers+connections unsp  
25 Congenital cardiovasc dis - unsp whether in preg/puerperium  
26 Congenital cardiovascular disorder during pregnancy - baby delivered  
27 Congenital cardiovascular disorder during pregnancy - baby not yet delivered  
28 Congenital cardiovascular disorder in the puerperium - baby delivered during current episode of care  
29 Congenital cardiovascular disorder in the puerperium - baby delivered during previous episode of care  
30 Congenital cardiovascular disorder in preg/childb/puerp NOS  
31 Congenital cardiovascular disorders during pregnancy, childbirth and the puerperium  
32 Congenital complete atrioventricular heart block  
33 Congenital heart anomaly NOS  
34 Congenital incomplete atrio-ventricular heart block  
35 Congenital malforms of cardiac chambers+connections unsp  
36 Congenital dextroposition of heart  
37 [RFC] Chronic heart disease (CHD)  
38 [RFC] Congenital heart disease  
39 Mental retardation, congenital heart disease, blepharophimosis, blepharoptosis and hypoplastic teeth  
40 Percutaneous transluminal ablation of congenital heart malformation  
41 Congenital anomaly of heart  
42 CHD - Congenital heart disease  
43 Coloboma, congenital heart disease, choanal atresia, growth retardation, genital hypoplasia, ear and hearing a  
44 Congenital atresia of cardiac vein  
45 Congenital malposition of cardiac apex  
46 CHD - Coronary heart disease  
47 Congenital incomplete atrioventricular heart block  
48 Congenital abnormality of cardiac connection  
49 Heart failure due to end stage congenital heart disease  
50 Congenital anomaly of cardiac chamber

1 Intellectual disability, congenital heart disease, blepharophimosis, blepharoptosis and hypoplastic teeth  
2 Acute congestive heart failure  
3 Congestive heart failure  
4 Acute heart failure  
5 Heart failure  
6 Cardiac failure  
7 Chronic congestive heart failure  
8 Right heart failure  
9 H/O: heart failure  
10 Hypertensive heart and renal disease with renal failure  
11 Decompensated cardiac failure  
12 Compensated cardiac failure  
13 Post cardiac operation heart failure NOS  
14 Cardiac failure following abortive pregnancy  
15 Cardiorespiratory failure  
16 Heart transplant failure and rejection  
17 Heart-lung transplant failure and rejection  
18 Cardiorespiratory failure as a complication of care  
19 Heart failure as a complication of care  
20 Heart failure NOS  
21 Neonatal cardiac failure  
22 Cardiac failure therapy  
23 H/O: Heart failure in last year  
24 Congestive cardiac failure  
25 Biventricular congestive heart failure  
26 Heart failure confirmed  
27 Emergency hospital admission for heart failure  
28 Congestive heart failure due to valvular disease  
29 Cardiac failure NOS  
30 Benign hypertensive heart disease with congestive cardiac failure  
31 Benign hypertensive heart disease without CCF  
32 Malignant hypertensive heart disease with congestive cardiac failure  
33 Malignant hypertensive heart disease without congestive heart failure  
34 Hypertensive heart disease NOS with CCF  
35 Hypertensive heart disease NOS without CCF  
36 Hypertensive heart and renal disease with (congestive) heart failure  
37 Hypertensive heart and renal disease with both (congestive) heart failure and renal failure  
38 [RFC] Cardiac failure  
39 Heart failure with normal ejection fraction  
40 HFNEF - heart failure with normal ejection fraction  
41 Emergency heart failure admission since last appointment  
42 Heart failure with preserved ejection fraction  
43 On optimal heart failure therapy  
44 Acute left heart failure  
45 Chronic left-sided congestive heart failure  
46 High output heart failure  
47 Chronic right-sided heart failure  
48 Congestive cardiac failure  
49 CCF - Congestive cardiac failure  
50 CHF - Congestive heart failure

1 Right heart failure secondary to left heart failure  
2 Hypertensive heart failure  
3 Chronic heart failure  
4 Hypertensive heart disease without congestive heart failure  
5 Chronic right-sided congestive heart failure  
6 HF - Heart failure  
7 Left heart failure  
8 Left-sided heart failure  
9 Chronic left-sided heart failure  
10 History of heart failure  
11 Refractory heart failure  
12 Acute right-sided heart failure  
13 Systolic heart failure  
14 Diastolic heart failure  
15 Decompensated chronic heart failure  
16 Right heart failure due to pulmonary hypertension  
17 Congestive heart failure due to left ventricular systolic dysfunction  
18 Chronic systolic heart failure  
19 Chronic diastolic heart failure  
20 Heart failure with preserved ejection fraction  
21 Acute exacerbation of chronic congestive heart failure  
22 Symptomatic congestive heart failure  
23 Heart failure with reduced ejection fraction  
24 Heart failure with reduced ejection fraction due to coronary artery disease  
25 Heart failure with reduced ejection fraction due to myocarditis  
26 Heart failure with reduced ejection fraction due to cardiomyopathy  
27 Heart failure with reduced ejection fraction due to heart valve disease  
28 Congestive heart failure with right heart failure  
29 Exacerbation of congestive heart failure  
30 Chronic combined systolic and diastolic heart failure  
31 Heart failure with mid range ejection fraction  
32 Low output heart failure due to and following Fontan operation  
33 Acute on chronic right-sided congestive heart failure  
34  
35  
36  
37  
38  
39  
40  
41  
42  
43  
44  
45  
46  
47  
48  
49  
50  
51  
52  
53  
54  
55  
56  
57  
58  
59  
60

1  
2  
3  
4  
5  
6  
7  
8  
9  
10  
11  
12  
13  
14  
15  
16  
17  
18  
19  
20  
21  
22  
23  
24  
25  
26  
27  
28  
29  
30  
31  
32  
33  
34  
35  
36  
37  
38  
39  
40  
41  
42  
43  
44  
45  
46  
47  
48  
49  
50  
51  
52  
53  
54  
55  
56  
57  
58  
59  
60

For peer review only

1  
2  
3  
4  
5  
6  
7  
8  
9  
10  
11  
12  
13  
14  
15  
16  
17  
18  
19  
20  
21  
22  
23  
24  
25  
26  
27  
28  
29  
30  
31  
32  
33  
34  
35  
36  
37  
38  
39  
40  
41  
42  
43  
44  
45  
46  
47  
48  
49  
50  
51  
52  
53  
54  
55  
56  
57  
58  
59  
60

For peer review only

1  
2  
3  
4  
5  
6  
7  
8  
9  
10  
11  
12  
13  
14  
15  
16  
17  
18  
19  
20  
21  
22  
23  
24  
25  
26  
27  
28  
29  
30  
31  
32  
33  
34  
35  
36  
37  
38  
39  
40  
41  
42  
43  
44  
45  
46  
47  
48  
49  
50  
51  
52  
53  
54  
55  
56  
57  
58  
59  
60

For peer review only

1  
2  
3  
4  
5  
6  
7  
8  
9  
10  
11  
12  
13  
14  
15  
16  
17  
18  
19  
20  
21  
22  
23  
24  
25  
26  
27  
28  
29  
30  
31  
32  
33  
34  
35  
36  
37  
38  
39  
40  
41  
42  
43  
44  
45  
46  
47  
48  
49  
50  
51  
52  
53  
54  
55  
56  
57  
58  
59  
60

For peer review only

1  
2  
3  
4  
5  
6  
7  
8  
9  
10  
11  
12  
13  
14  
15  
16  
17  
18  
19  
20  
21  
22  
23  
24  
25  
26  
27  
28  
29  
30  
31  
32  
33  
34  
35  
36  
37  
38  
39  
40  
41  
42  
43  
44  
45  
46  
47  
48  
49  
50  
51  
52  
53  
54  
55  
56  
57  
58  
59  
60

For peer review only



1  
2  
3  
4  
5  
6  
7  
8  
9  
10  
11  
12  
13  
14  
15  
16  
17  
18  
19  
20  
21  
22  
23  
24  
25  
26  
27  
28  
29  
30  
31  
32  
33  
34  
35  
36  
37  
38  
39  
40  
41  
42  
43  
44  
45  
46  
47  
48  
49  
50  
51  
52  
53  
54  
55  
56  
57  
58  
59  
60

For peer review only

1  
2  
3  
4  
5  
6  
7  
8  
9  
10  
11  
12  
13  
14  
15  
16  
17  
18  
19  
20  
21  
22  
23  
24  
25  
26  
27  
28  
29  
30  
31  
32  
33  
34  
35  
36  
37  
38  
39  
40  
41  
42  
43  
44  
45  
46  
47  
48  
49  
50  
51  
52  
53  
54  
55  
56  
57  
58  
59  
60

For peer review only

1  
2  
3  
4  
5  
6  
7  
8  
9  
10  
11  
12  
13  
14  
15  
16  
17  
18  
19  
20  
21  
22  
23  
24  
25  
26  
27  
28  
29  
30  
31  
32  
33  
34  
35  
36  
37  
38  
39  
40  
41  
42  
43  
44  
45  
46  
47  
48  
49  
50  
51  
52  
53  
54  
55  
56  
57  
58  
59  
60

For peer review only

1  
2  
3  
4  
5  
6  
7  
8  
9  
10  
11  
12  
13  
14  
15  
16  
17  
18  
19  
20  
21  
22  
23  
24  
25  
26  
27  
28  
29  
30  
31  
32  
33  
34  
35  
36  
37  
38  
39  
40  
41  
42  
43  
44  
45  
46  
47  
48  
49  
50  
51  
52  
53  
54  
55  
56  
57  
58  
59  
60

For peer review only

1  
2  
3  
4  
5  
6  
7  
8  
9  
10  
11  
12  
13  
14  
15  
16  
17  
18  
19  
20  
21  
22  
23  
24  
25  
26  
27  
28  
29  
30  
31  
32  
33  
34  
35  
36  
37  
38  
39  
40  
41  
42  
43  
44  
45  
46  
47  
48  
49  
50  
51  
52  
53  
54  
55  
56  
57  
58  
59  
60

For peer review only

1  
2  
3  
4  
5  
6  
7  
8  
9  
10  
11  
12  
13  
14  
15  
16  
17  
18  
19  
20  
21  
22  
23  
24  
25  
26  
27  
28  
29  
30  
31  
32  
33  
34  
35  
36  
37  
38  
39  
40  
41  
42  
43  
44  
45  
46  
47  
48  
49  
50  
51  
52  
53  
54  
55  
56  
57  
58  
59  
60

For peer review only

1  
2  
3  
4  
5  
6  
7  
8  
9  
10  
11  
12  
13  
14  
15  
16  
17  
18  
19  
20  
21  
22  
23  
24  
25  
26  
27  
28  
29  
30  
31  
32  
33  
34  
35  
36  
37  
38  
39  
40  
41  
42  
43  
44  
45  
46  
47  
48  
49  
50  
51  
52  
53  
54  
55  
56  
57  
58  
59  
60

me

For peer review only

1  
2  
3  
4  
5  
6  
7  
8  
9  
10  
11  
12  
13  
14  
15  
16  
17  
18  
19  
20  
21  
22  
23  
24  
25  
26  
27  
28  
29  
30  
31  
32  
33  
34  
35  
36  
37  
38  
39  
40  
41  
42  
43  
44  
45  
46  
47  
48  
49  
50  
51  
52  
53  
54  
55  
56  
57  
58  
59  
60

For peer review only

me



|    |             |
|----|-------------|
| 1  |             |
| 2  | ICD-10 code |
| 3  | I48.0       |
| 4  | I48.1       |
| 5  | I48.11      |
| 6  | I48.19      |
| 7  | I48.2       |
| 8  | I48.20      |
| 9  | I48.21      |
| 10 | I48.3       |
| 11 | I48.4       |
| 12 | I48.9       |
| 13 | I48.91      |
| 14 | I48.92      |
| 15 | I82.0       |
| 16 | I82.1       |
| 17 | I82.2       |
| 18 | I82.3       |
| 19 | I82.4       |
| 20 | I82.5       |
| 21 | I82.6       |
| 22 | I82.A       |
| 23 | I82.B       |
| 24 | I82.C       |
| 25 | I82.8       |
| 26 | I82.9       |
| 27 | I20         |
| 28 | I20.0       |
| 29 | I20.1       |
| 30 | I20.8       |
| 31 | I20.9       |
| 32 | I21         |
| 33 | I21.0       |
| 34 | I21.1       |
| 35 | I21.2       |
| 36 | I21.3       |
| 37 | I21.4       |
| 38 | I21.9       |
| 39 | I22         |
| 40 | I22.0       |
| 41 | I22.1       |
| 42 | I22.8       |
| 43 | I22.9       |
| 44 | I23         |
| 45 | I23.0       |
| 46 | I23.1       |
| 47 | I23.2       |
| 48 | I23.3       |
| 49 | I23.4       |
| 50 | I23.5       |
| 51 | I23.6       |

For peer review only

|    |         |
|----|---------|
| 1  |         |
| 2  | I23.8   |
| 3  | I24     |
| 4  | I24.0   |
| 5  | I24.1   |
| 6  | I24.8   |
| 7  | I24.9   |
| 8  | I25     |
| 9  | I25.1   |
| 10 | I25.2   |
| 11 | I25.5   |
| 12 | I25.6   |
| 13 | I25.8   |
| 14 | I25.9   |
| 15 | Z95.5   |
| 16 | Q20.0   |
| 17 | Q20.3   |
| 18 | Q20.1   |
| 19 | Q20.5   |
| 20 | Q20.4   |
| 21 | Q20.2   |
| 22 | Q22.0   |
| 23 | Q22.9   |
| 24 | Q23.4   |
| 25 | Q22.6   |
| 26 | Q21.3   |
| 27 | Q21.2   |
| 28 | Q21.2   |
| 29 | Q22.5   |
| 30 | Q25.1   |
| 31 | Q26.2   |
| 32 | Q26.3   |
| 33 | Q21.0   |
| 34 | I50.1   |
| 35 | I50.20  |
| 36 | I50.21  |
| 37 | I50.22  |
| 38 | I50.23  |
| 39 | I50.30  |
| 40 | I50.31  |
| 41 | I50.32  |
| 42 | I50.33  |
| 43 | I50.40  |
| 44 | I50.41  |
| 45 | I50.42  |
| 46 | I50.43  |
| 47 | I50.810 |
| 48 | I50.811 |
| 49 | I50.812 |
| 50 | I50.813 |
| 51 | I50.814 |

For peer review only

1  
2 150.82  
3 150.83  
4 150.84  
5 150.89  
6 150.9  
7  
8  
9  
10  
11  
12  
13  
14  
15  
16  
17  
18  
19  
20  
21  
22  
23  
24  
25  
26  
27  
28  
29  
30  
31  
32  
33  
34  
35  
36  
37  
38  
39  
40  
41  
42  
43  
44  
45  
46  
47  
48  
49  
50  
51  
52  
53  
54  
55  
56  
57  
58  
59  
60

For peer review only

|    |                                                                                                      |
|----|------------------------------------------------------------------------------------------------------|
| 1  |                                                                                                      |
| 2  | Term                                                                                                 |
| 3  | Paroxysmal atrial fibrillation                                                                       |
| 4  | Persistent atrial fibrillation                                                                       |
| 5  | Longstanding persistent atrial fibrillation                                                          |
| 6  | Other persistent atrial fibrillation                                                                 |
| 7  | Chronic atrial fibrillation                                                                          |
| 8  | Chronic atrial fibrillation..... unspecified                                                         |
| 9  | Permanent atrial fibrillation                                                                        |
| 10 | Typical atrial flutter                                                                               |
| 11 | Atypical atrial flutter                                                                              |
| 12 | Unspecified atrial fibrillation and atrial flutter                                                   |
| 13 | Unspecified atrial fibrillation                                                                      |
| 14 | Unspecified atrial flutter                                                                           |
| 15 | Budd-Chiari syndrome                                                                                 |
| 16 | Thrombophlebitis migrans                                                                             |
| 17 | Embolism and thrombosis of vena cava and other thoracic veins                                        |
| 18 | Embolism and thrombosis of renal vein                                                                |
| 19 | Acute embolism and thrombosis of deep veins of lower extremity                                       |
| 20 | Chronic embolism and thrombosis of deep veins of lower extremity                                     |
| 21 | Acute embolism and thrombosis of veins of upper extremity                                            |
| 22 | Embolism and thrombosis of axillary vein                                                             |
| 23 | Embolism and thrombosis of subclavian vein                                                           |
| 24 | Embolism and thrombosis of internal jugular vein                                                     |
| 25 | Embolism and thrombosis of other specified veins                                                     |
| 26 | Embolism and thrombosis of unspecified vein                                                          |
| 27 | angina pectoris                                                                                      |
| 28 | unstable angina                                                                                      |
| 29 | angina pectoris with documented spasm                                                                |
| 30 | other forms of angina pectoris                                                                       |
| 31 | angina pectoris, unspecified                                                                         |
| 32 | acute myocardial infarction                                                                          |
| 33 | acute transmural myocardial infarction of anterior wall                                              |
| 34 | acute transmural myocardial infarction of inferior wall                                              |
| 35 | acute transmural myocardial infarction of other sites                                                |
| 36 | acute transmural myocardial infarction of unspecified site                                           |
| 37 | acute subendocardial myocardial infarction                                                           |
| 38 | acute myocardial infarction, unspecified                                                             |
| 39 | subsequent myocardial infarction                                                                     |
| 40 | subsequent myocardial infarction of anterior wall                                                    |
| 41 | subsequent myocardial infarction of inferior wall                                                    |
| 42 | subsequent myocardial infarction of other sites                                                      |
| 43 | subsequent myocardial infarction of unspecified site                                                 |
| 44 | certain current complications following acute myocardial infarction                                  |
| 45 | haemopericardium as current complication following acute myocardial infarction                       |
| 46 | atrial septal defect as current complication following acute myocardial infarction                   |
| 47 | ventricular septal defect as current complication following acute myocardial infarction              |
| 48 | rupture of cardiac wall without haemopericardium as current complication following acute myocardia   |
| 49 | rupture of chordae tendineae as current complication following acute myocardial infarction           |
| 50 | rupture of papillary muscle as current complication following acute myocardial infarction            |
| 51 | thrombosis of atrium, auricular appendage, and ventricle as current complications following acute my |

1 other current complications following acute myocardial infarction  
2 other acute ischaemic heart diseases  
3 coronary thrombosis not resulting in myocardial infarction  
4 dressler's syndrome  
5 other forms of acute ischaemic heart disease  
6 acute ischaemic heart disease, unspecified  
7 chronic ischaemic heart disease  
8 atherosclerotic heart disease  
9 old myocardial infarction  
10 ischaemic cardiomyopathy  
11 silent myocardial ischaemia  
12 other forms of chronic ischaemic heart disease  
13 chronic ischaemic heart disease, unspecified  
14 presence of coronary angioplasty implant and graft  
15 Common arterial trunk  
16 Discordant ventriculoarterial connection  
17 Double outlet right ventricle  
18 Discordant atrioventricular connection  
19 Double inlet left ventricle  
20 Double outlet left ventricle  
21 Pulmonary valve atresia  
22 Congenital malformation of tricuspid valve, unspecified  
23 Hypoplastic left heart syndrome  
24 Hypoplastic right heart syndrome  
25 Tetralogy of Fallot  
26 Atrioventricular septal defect  
27 Atrioventricular septal defect  
28 Ebstein's anomaly  
29 Coarctation of the aorta  
30 Total anomalous pulmonary venous connection  
31 Partial anomalous pulmonary venous connection  
32 Ventricular septal defect  
33 Left ventricular failure, unspecified  
34 Unspecified systolic (congestive) heart failure  
35 Acute systolic (congestive) heart failure  
36 Chronic systolic (congestive) heart failure  
37 Acute on chronic systolic (congestive) heart failure  
38 Unspecified diastolic (congestive) heart failure  
39 Acute diastolic (congestive) heart failure  
40 Chronic diastolic (congestive) heart failure  
41 Acute on chronic diastolic (congestive) heart failure  
42 Unspecified combined systolic (congestive) and diastolic (congestive) heart failure  
43 Acute combined systolic (congestive) and diastolic (congestive) heart failure  
44 Chronic combined systolic (congestive) and diastolic (congestive) heart failure  
45 Acute on chronic combined systolic (congestive) and diastolic (congestive) heart failure  
46 Right heart failure, unspecified  
47 Acute right heart failure  
48 Chronic right heart failure  
49 Acute on chronic right heart failure  
50 Right heart failure due to left heart failure

- 1
- 2     Biventricular heart failure
- 3     High output heart failure
- 4     End stage heart failure
- 5     Heart failure, unspecified
- 6     Heart failure, unspecified
- 7

- 8
- 9
- 10
- 11
- 12
- 13
- 14
- 15
- 16
- 17
- 18
- 19
- 20
- 21
- 22
- 23
- 24
- 25
- 26
- 27
- 28
- 29
- 30
- 31
- 32
- 33
- 34
- 35
- 36
- 37
- 38
- 39
- 40
- 41
- 42
- 43
- 44
- 45
- 46
- 47
- 48
- 49
- 50
- 51
- 52
- 53
- 54
- 55
- 56
- 57
- 58
- 59
- 60

For peer review only

1  
2  
3  
4  
5  
6  
7  
8  
9  
10  
11  
12  
13  
14  
15  
16  
17  
18  
19  
20  
21  
22  
23  
24  
25  
26  
27  
28  
29  
30  
31  
32  
33  
34  
35  
36  
37  
38  
39  
40  
41  
42  
43  
44  
45  
46  
47  
48  
49  
50  
51  
52  
53  
54  
55  
56  
57  
58  
59  
60

For peer review only

al

/

|    |                |
|----|----------------|
| 1  |                |
| 2  | Medcodeid      |
| 3  | 17316019       |
| 4  | 38322017       |
| 5  | 43768016       |
| 6  | 54939014       |
| 7  | 81307015       |
| 8  | 86957016       |
| 9  | 103605014      |
| 10 | 110356018      |
| 11 | 119846018      |
| 12 | 135166013      |
| 13 | 205225016      |
| 14 | 249896014      |
| 15 | 291673013      |
| 16 | 291674019      |
| 17 | 291741010      |
| 18 | 292496015      |
| 19 | 293394013      |
| 20 | 303806010      |
| 21 | 303825013      |
| 22 | 303826014      |
| 23 | 303832016      |
| 24 | 303833014      |
| 25 | 303834015      |
| 26 | 303838017      |
| 27 | 303839013      |
| 28 | 303842019      |
| 29 | 303843012      |
| 30 | 303844018      |
| 31 | 303845017      |
| 32 | 303846016      |
| 33 | 303848015      |
| 34 | 303849011      |
| 35 | 303853013      |
| 36 | 303854019      |
| 37 | 303855018      |
| 38 | 303884010      |
| 39 | 303902013      |
| 40 | 304056012      |
| 41 | 304058013      |
| 42 | 304063012      |
| 43 | 354340015      |
| 44 | 354508018      |
| 45 | 354540019      |
| 46 | 354621016      |
| 47 | 396706011      |
| 48 | 1227517019     |
| 49 | 1230030015     |
| 50 | 84371000006110 |
| 51 | 84551000006113 |
| 52 |                |
| 53 |                |
| 54 |                |
| 55 |                |
| 56 |                |
| 57 |                |
| 58 |                |
| 59 |                |
| 60 |                |

For peer review only



1 84741000006118  
2 127091000006118  
3 280531000006119  
4 312531000006111  
5 312541000006118  
6 313751000006119  
7 677461000006115  
8 677471000006110  
9 677481000006113  
10 677561000006119  
11 677621000006112  
12 678001000006110  
13 678061000006111  
14 703481000006116  
15 710221000006113  
16 771391000006117  
17 821441000006115  
18 821461000006116  
19 821471000006111  
20 821481000006114  
21 821711000006113  
22 913831000006114  
23 913851000006119  
24 914261000006119  
25 914271000006114  
26 1847541000006113  
27 2687831000006115  
28 2900601000006112  
29 3097031000006111  
30 3222371000006111  
31 3347091000006118  
32 4059091000006113  
33 5093351000006116  
34 5093381000006112  
35 5096141000006114  
36 5481301000006114  
37 5912131000006112  
38 7598001000006110  
39 12717101000006112  
40 3528309015  
41 618431000000114  
42 618441000000117  
43 618451000000119  
44 618461000000116  
45 618471000000111  
46 618481000000113  
47 618491000000110  
48 618501000000116  
49 618511000000119  
50 618521000000113

For peer review only

1  
2 1940501000006119  
3 1940511000006116  
4 1940521000006112  
5 1940531000006110  
6 1940541000006117  
7  
8 1940551000006115  
9 1940621000006111  
10 1940631000006114  
11 1940641000006116  
12 1940651000006119  
13 1940661000006117  
14 1940671000006112  
15  
16 7147741000006114  
17 7174791000006111  
18 7174851000006111  
19 7643311000006115  
20 8104231000006115  
21 8104261000006112  
22 8104301000006115  
23 8104381000006112  
24 8104451000006111  
25 8104551000006112  
26 8294821000006118  
27  
28 108730018  
29 299665018  
30 299673010  
31 305944016  
32 305945015  
33 305947011  
34 305949014  
35 354505015  
36 354521013  
37 398347019  
38 3634081012  
39 177311000006112  
40 215521000000116  
41 641491000006116  
42 741701000006114  
43 789941000006117  
44 811521000006115  
45 3902031000006117  
46 7643331000006114  
47 12704471000006116  
48 278834012  
49 278835013  
50 354417015  
51 402249011  
52 509111010  
53 480871000006117  
54 619541000006116  
55  
56  
57  
58  
59  
60

For peer review only

1  
2 641471000006117  
3 3245861000006116  
4 3245881000006114  
5 3331291000006117  
6 3973811000006118  
7 3973841000006119  
8 5094161000006119  
9 5094171000006114  
10 7043231000006112  
11 84921000006110  
12 913841000006116  
13 914031000006118  
14 2767383018  
15 2767385013  
16 2773184015  
17 304071000000115  
18 304091000000116  
19 304111000000114  
20 557811000000119  
21 557831000000110  
22 595871000000110  
23 595931000000116  
24 595991000000115  
25 596051000000115  
26 596131000000114  
27 596191000000110  
28 596261000000111  
29 596321000000110  
30 596401000000111  
31 886641000006117  
32 994421000006111  
33 994441000006116  
34 2002961000006113  
35 2002971000006118  
36 3245841000006115  
37 3842511000006119  
38 7480371000006113  
39 7615331000006115  
40 7615361000006112  
41 7714891000006118  
42 7714921000006112  
43 7966611000006114  
44 7966641000006113  
45 7966691000006116  
46 7966761000006115  
47 7966791000006111  
48 8027391000006115  
49 8027491000006113  
50 8030421000006114  
51 8030431000006112

For peer review only

1  
2 8040661000006119  
3 8040681000006112  
4 8044061000006119  
5 8212401000006115  
6 8345931000006110  
7 8346001000006110  
8 8346021000006117  
9 14174321000006116  
10  
11 354316011  
12 7954351000006118  
13 7103511000006119  
14 117168016  
15 1549841000006116  
16 1550021000006110  
17 177251000006119  
18 177341000006111  
19 1905531000006112  
20 2189151000000117  
21 2191221000000118  
22 2197961000000113  
23 2198001000000111  
24 2198141000000110  
25 2209021000000112  
26 2209101000000119  
27 2234541000000115  
28 2234621000000111  
29 272320011  
30 272325018  
31 272326017  
32 272327014  
33 272389014  
34 284213011  
35 324973015  
36 353974015  
37 354610013  
38 354612017  
39 354613010  
40 354615015  
41 354616019  
42 354617011  
43 354618018  
44 354619014  
45 354621016  
46 354623018  
47 354624012  
48 354627017  
49 354628010  
50 3647021000006114  
51 3647031000006112  
52 3647051000006117

For peer review only

1  
2 3647061000006115  
3 3647071000006110  
4 366671000000118  
5 372621000000114  
6 380061000000118  
7 380101000000116  
8 386181000000111  
9 387351000000117  
10 387911000000115  
11 394365013  
12 399381000000115  
13 413415016  
14 422992018  
15 424791000006110  
16 4542501000006119  
17 460644012  
18 4668951000006113  
19 4668961000006110  
20 4668971000006115  
21 4668981000006117  
22 4669011000006116  
23 4669051000006115  
24 4669451000006113  
25 478131000006115  
26 500371000006119  
27 501594013  
28 5486891000006118  
29 7091541000006113  
30 754061000006111  
31 7688001000006116  
32 7688041000006119  
33 7688541000006114  
34 900121000006113  
35 90461000006118  
36 90471000006113  
37 906351000006116  
38 988961000006115  
39 5063371000006112  
40  
41  
42  
43  
44  
45  
46  
47  
48  
49  
50  
51  
52  
53  
54  
55  
56  
57  
58  
59  
60

For peer review only

|    |                                                             |
|----|-------------------------------------------------------------|
| 1  |                                                             |
| 2  | Term                                                        |
| 3  | Nephroptosis                                                |
| 4  | Juvenile nephropathic cystinosis                            |
| 5  | Balkan nephropathy                                          |
| 6  | Nephrosclerosis                                             |
| 7  | Congenital nephrotic syndrome                               |
| 8  | Nephrotic syndrome                                          |
| 9  | Infantile nephropathic cystinosis                           |
| 10 | Amyloid nephropathy of Ostertag                             |
| 11 | Nephrogenic diabetes insipidus                              |
| 12 | Acquired nephrogenic diabetes insipidus                     |
| 13 | Diabetic nephropathy                                        |
| 14 | Haemorrhagic nephrosonephritis                              |
| 15 | [M]Epithelial nephroblastoma                                |
| 16 | [M]Mesenchymal nephroblastoma                               |
| 17 | [M]Mesonephroma NOS                                         |
| 18 | Diabetes mellitus with nephropathy NOS                      |
| 19 | Gouty nephropathy                                           |
| 20 | Nephritis, nephrosis and nephrotic syndrome                 |
| 21 | Nephrotic syndrome with proliferative glomerulonephritis    |
| 22 | Nephrotic syndrome with membranous glomerulonephritis       |
| 23 | Nephrotic syndrome, minor glomerular abnormality            |
| 24 | Nephrotic syndrome, focal and segmental glomerular lesions  |
| 25 | Nephrotic syndrome, diffuse membranous glomerulonephritis   |
| 26 | Nephrotic syndrome, dense deposit disease                   |
| 27 | Nephrotic syndrome, diffuse crescentic glomerulonephritis   |
| 28 | Congenital Finnish nephrosis                                |
| 29 | Congenital nephrotic syndrome NOS                           |
| 30 | Nephrotic syndrome in diseases EC                           |
| 31 | Nephrotic syndrome in amyloidosis                           |
| 32 | Nephrotic syndrome in diabetes mellitus                     |
| 33 | Nephrotic syndrome in malaria                               |
| 34 | Nephrotic syndrome in polyarteritis nodosa                  |
| 35 | Nephrotic syndrome associated with another disorder         |
| 36 | Nephrotic syndrome with other pathological kidney lesions   |
| 37 | Nephrotic syndrome NOS                                      |
| 38 | Berger's IgA or IgG nephropathy                             |
| 39 | Other nephritis and nephrosis unspecified                   |
| 40 | Other specified nephritis, nephrosis or nephrotic syndrome  |
| 41 | Nephritis, nephrosis and nephrotic syndrome NOS             |
| 42 | Chronic pyonephrosis                                        |
| 43 | Congenital nephrotic syndrome with focal glomerulosclerosis |
| 44 | Clinical diabetic nephropathy                               |
| 45 | Chronic cyclosporin A nephrotoxicity                        |
| 46 | Chronic transplant nephropathy                              |
| 47 | Nephrotic syndrome with minimal change glomerulonephritis   |
| 48 | [M]Nephroblastoma NOS                                       |
| 49 | Chronic lithium nephrotoxicity                              |
| 50 | Type 1 diabetes mellitus with nephropathy                   |
| 51 | Type 2 diabetes mellitus with nephropathy                   |

1 Type I diabetes mellitus with nephropathy  
2 Steroid-sensitive nephrotic syndrome  
3 Non-insulin dependent diabetes mellitus with nephropathy  
4 Malignant mesonephroma  
5 [M]Mesonephromas  
6 [M]Nephromas and nephroblastomas  
7 Nephrotic syndrome, diffuse mesangial proliferative glomerulonephritis  
8 Nephrotic syndrome, diffuse mesangiocapillary glomerulonephritis  
9 Nephrotic syndrome, diffuse endocapillary proliferative glomerulonephritis  
10 Nephrotic syndrome in systemic lupus erythematosus  
11 Nephrotic syndrome with membranoproliferative glomerulonephritis  
12 Nephrocalcinosis  
13 Nephropathy - chronic  
14 Microcystic type congenital nephrotic syndrome  
15 Finnish congenital nephrotic syndrome  
16 Insulin dependent diabetes mellitus with nephropathy  
17 Hereditary nephropathy NEC,focal+segmnt glomerular lesion  
18 Hereditary nephropathy, NEC, dense deposit disease  
19 Hereditary nephropathy, unspecif morphological changes  
20 Hereditary nephropathy, NEC,difus crescentic glomnephritis  
21 Hereditary nephropathy NEC,difus membran glomerulnephritis  
22 Insulin dependent diabetes mellitus with nephropathy  
23 Type I diabetes mellitus with nephropathy  
24 Diabetes type 2 with nephropathy  
25 Type II diabetes mellitus with nephropathy  
26 Wilms' tumour and nephrotic syndrome with pseudohermaphroditism  
27 Mesoblastic nephroma  
28 Nephroblastoma  
29 Granulomatous sarcoid nephropathy  
30 Minimal change nephrotic syndrome  
31 NS - Nephrotic syndrome  
32 Bilateral hydronephrosis  
33 Steroid-resistant nephrotic syndrome  
34 Steroid-dependent nephrotic syndrome  
35 Chronic allograft nephropathy  
36 Nephrotic range proteinuria  
37 Nephroblastoma  
38 Childhood nephrotic syndrome  
39 Nephritis, nephrosis and nephrotic syndrome  
40 MCKD - Multicystic kidney disease  
41 CKD stage 3 with proteinuria  
42 CKD stage 3 without proteinuria  
43 CKD stage 3A with proteinuria  
44 CKD stage 3A without proteinuria  
45 CKD stage 3B with proteinuria  
46 CKD stage 3B without proteinuria  
47 CKD stage 4 with proteinuria  
48 CKD stage 4 without proteinuria  
49 CKD stage 5 with proteinuria  
50 CKD stage 5 without proteinuria

1  
2 CKD G4A1 - chronic kidney disease with glomerular filtration rate category G4 and albuminuria category A1  
3 CKD G4A2 - chronic kidney disease with glomerular filtration rate category G4 and albuminuria category A2  
4 CKD G4A3 - chronic kidney disease with glomerular filtration rate category G4 and albuminuria category A3  
5 CKD G5A1 - chronic kidney disease with glomerular filtration rate category G5 and albuminuria category A1  
6 CKD G5A2 - chronic kidney disease with glomerular filtration rate category G5 and albuminuria category A2  
7 CKD G5A3 - chronic kidney disease with glomerular filtration rate category G5 and albuminuria category A3  
8 CKD G3aA1 - chronic kidney disease with glomerular filtration rate category G3a and albuminuria category A1  
9 CKD G3aA2 - chronic kidney disease with glomerular filtration rate category G3a and albuminuria category A2  
10 CKD G3aA3 - chronic kidney disease with glomerular filtration rate category G3a and albuminuria category A3  
11 CKD G3bA1 - chronic kidney disease with glomerular filtration rate category G3b and albuminuria category A1  
12 CKD G3bA2 - chronic kidney disease with glomerular filtration rate category G3b and albuminuria category A2  
13 CKD G3bA3 - chronic kidney disease with glomerular filtration rate category G3b and albuminuria category A3  
14  
15 CKD stage 1  
16 CKD stage 3  
17 CKD stage 5  
18  
19 CKD - chronic kidney disease  
20 CKD (chronic kidney disease) stage 3 with proteinuria  
21 CKD (chronic kidney disease) stage 3 without proteinuria  
22 CKD (chronic kidney disease) stage 3A with proteinuria  
23 CKD (chronic kidney disease) stage 3B with proteinuria  
24 CKD (chronic kidney disease) stage 4 with proteinuria  
25 CKD (chronic kidney disease) stage 5 without proteinuria  
26 eGFR (estimated glomerular filtration rate) using CKD-Epi (Chronic Kidney Disease Epidemiology Collaboration)  
27 Malignant hypertensive renal disease  
28 Hypertensive renal disease with renal failure  
29 Hypertensive heart and renal disease with renal failure  
30 Unspecified renal disease in pregnancy unspecified  
31 Unspecified renal disease in pregnancy - delivered  
32 Unspecified renal disease in pregnancy - not delivered  
33 Unspecified renal disease in pregnancy NOS  
34 Renal disorders in systemic disease  
35 Renal involvement in malignant disease  
36 Unspecified renal disease in pregnancy  
37 POS-S Renal (Palliative care Outcome Scale symptom list for end-stage renal disease) score  
38 Renal tubulo-interstitial disorders in neoplastic diseases  
39 End stage renal disease  
40 End-stage renal disease  
41 Hypertensive heart and renal disease with (congestive) heart failure  
42 Hypertensive heart and renal disease with both (congestive) heart failure and renal failure  
43 H/O: renal disease  
44 Cardiorenal disease  
45 Chronic renal disease  
46 End-stage renal disease  
47 Other specified compensation for renal failure  
48 Compensation for renal failure NOS  
49 Acute-on-chronic renal failure  
50 Congenital renal failure  
51 Chronic renal failure  
52 Anaemia of chronic renal failure  
53 Dialysis for renal failure  
54  
55  
56  
57  
58  
59  
60



1 End stage renal failure  
2 ESCRF - End stage chronic renal failure  
3 End stage chronic renal failure  
4 Hepatorenal failure  
5 Chronic renal failure syndrome  
6 CRF - Chronic renal failure  
7 End stage renal failure on dialysis  
8 End stage renal failure with renal transplant  
9 Chronic progressive renal failure  
10 Renal disorder due to type 2 diabetes mellitus  
11 Renal disorder associated with type 1 diabetes mellitus  
12 Renal disorder associated with type II diabetes mellitus  
13 Chronic kidney disease stage 1  
14 Chronic kidney disease stage 4  
15 Chronic kidney disease stage 3  
16 Chronic kidney disease stage 3  
17 Chronic kidney disease stage 4  
18 Chronic kidney disease stage 5  
19 Chronic kidney disease stage 3A  
20 Chronic kidney disease stage 3B  
21 Chronic kidney disease stage 3 without proteinuria  
22 Chronic kidney disease stage 3A with proteinuria  
23 Chronic kidney disease stage 3A without proteinuria  
24 Chronic kidney disease stage 3B with proteinuria  
25 Chronic kidney disease stage 3B without proteinuria  
26 Chronic kidney disease stage 4 with proteinuria  
27 Chronic kidney disease stage 4 without proteinuria  
28 Chronic kidney disease stage 5 with proteinuria  
29 Chronic kidney disease stage 5 without proteinuria  
30 Other kidney/urinary diseases  
31 Chronic kidney disease stage 3  
32 Chronic kidney disease stage 5  
33 Chronic kidney disease 3 monthly review  
34 Chronic kidney disease 4 monthly review  
35 End stage kidney disease  
36 PKD - Polycystic kidney disease  
37 H/O chronic kidney disease  
38 Anaemia in chronic kidney disease  
39 Anemia in chronic kidney disease  
40 Chronic kidney disease stage 5 on dialysis  
41 Chronic kidney disease stage 5 with transplant  
42 Chronic kidney disease stage 5 due to type 2 diabetes mellitus  
43 Chronic kidney disease stage 4 due to type 2 diabetes mellitus  
44 Chronic kidney disease stage 3 due to type 2 diabetes mellitus  
45 Chronic kidney disease stage 2 due to type 2 diabetes mellitus  
46 Chronic kidney disease stage 1 due to type 2 diabetes mellitus  
47 Chronic kidney disease stage 1 due to type 1 diabetes mellitus  
48 Chronic kidney disease stage 5 due to type 1 diabetes mellitus  
49 Hypertensive heart AND chronic kidney disease stage 4  
50 Hypertensive heart AND chronic kidney disease stage 3

1  
2 Chronic kidney disease stage 4 due to hypertension  
3 Chronic kidney disease stage 3 due to hypertension  
4 Hypertension in chronic kidney disease stage 3 due to type 2 diabetes mellitus  
5 Anaemia co-occurrent and due to chronic kidney disease stage 3  
6 Chronic kidney disease with glomerular filtration rate category G3a and albuminuria category A3  
7 Chronic kidney disease with glomerular filtration rate category G3b and albuminuria category A1  
8 Chronic kidney disease with glomerular filtration rate category G3b and albuminuria category A2  
9 Chronic kidney disease stage 5 due to drug induced diabetes mellitus  
10 Kidney disorder due to diabetes mellitus  
11 Acute kidney failure stage 3  
12 Disorder related to renal transplantation  
13 renal transplant  
14 allotransplantation kidney from cadaver, heart non-beating  
15 os interventions associated with transplantation of kidney  
16 renal transplant with complication, without blame  
17 renal tubulo-interstitial disorders in transplant rejection  
18 excision of rejected transplanted kidney  
19 urological complication of renal transplant  
20 vascular complication of renal transplant  
21 rupture of artery of transplanted kidney  
22 rupture of vein of transplanted kidney  
23 stenosis of vein of transplanted kidney  
24 aneurysm of vein of transplanted kidney  
25 aneurysm of artery of transplanted kidney  
26 thrombosis of artery of transplanted kidney  
27 thrombosis of vein of transplanted kidney  
28 allotransplantation of kidney from live donor  
29 cadaveric renal transplant  
30 other specified transplantation of kidney  
31 transplantation of kidney nos  
32 exploration of renal transplant  
33 renal transplant planned  
34 kidney transplant failure and rejection  
35 xenograft renal transplant  
36 renal transplant rejection  
37 accelerated rejection of renal transplant  
38 very mild acute rejection of renal transplant  
39 acute rejection of renal transplant  
40 acute rejection of renal transplant - grade i  
41 acute rejection of renal transplant - grade ii  
42 acute rejection of renal transplant - grade iii  
43 chronic rejection of renal transplant  
44 chronic transplant nephropathy  
45 chronic rejection of renal transplant - grade 1  
46 chronic rejection of renal transplant - grade ii  
47 chronic rejection of renal transplant - grade iii  
48 acute-on-chronic rejection of renal transplant  
49 transplant of kidney  
50 kidney transplantation  
51 tx - renal transplantation  
52

1 kidney transplant  
2  
3 tx - kidney transplantation  
4 interventions associated with transplantation of kidney  
5 allotransplantation of kidney from cadaver, heart-beating  
6 interventions associated with transplantation of kidney nos  
7  
8 post-transplantation of kidney examination, recipient  
9 pre-transplantation of kidney work-up, recipient  
10 post-transplantation of kidney examination, live donor  
11 pre-transplantation of kidney work-up, live donor  
12 transplant nephrectomy  
13 allotransplantation of kidney from cadaver nec  
14 unexplained episode of renal transplant dysfunction  
15 excision of rejected transplanted kidney  
16 [x]renal tubulo-interstitial disorders/transplant rejection  
17 history of renal transplant  
18 [v]kidney transplanted  
19 autotransplantation of kidney  
20 autotransplant kidney  
21 renal autotransplantation  
22 renal autotransplantation or reimplantation of kidney  
23 live donor renal allotransplant  
24 cadaver renal allotransplant  
25 exploration of kidney transplant  
26 allotransplantation of kidney from cadaver  
27 autotransplant of kidney  
28 transplantation of kidney  
29 removal of transplanted kidney  
30 post-transplantation of kidney examination of recipient  
31 kidney transplant with complication, without blame  
32 allotransplantation of kidney with dbd (donation after brain stem death)  
33 allotransplantation of kidney with dcd (donation after cardiac death)  
34 transplantation of kidney regime  
35 renal transplant rejected  
36 transplantation of kidney from cadaver  
37 transplantation of kidney from live donor  
38 [rfc] renal transplant  
39 renal transplant rejected  
40 Anemia of renal disease  
41  
42  
43  
44  
45  
46  
47  
48  
49  
50  
51  
52  
53  
54  
55  
56  
57  
58  
59  
60

1  
2  
3  
4  
5  
6  
7  
8  
9  
10  
11  
12  
13  
14  
15  
16  
17  
18  
19  
20  
21  
22  
23  
24  
25  
26  
27  
28  
29  
30  
31  
32  
33  
34  
35  
36  
37  
38  
39  
40  
41  
42  
43  
44  
45  
46  
47  
48  
49  
50  
51  
52  
53  
54  
55  
56  
57  
58  
59  
60

For peer review only

1  
2  
3  
4  
5  
6  
7  
8  
9  
10  
11  
12  
13  
14  
15  
16  
17  
18  
19  
20  
21  
22  
23  
24  
25  
26  
27  
28  
29  
30  
31  
32  
33  
34  
35  
36  
37  
38  
39  
40  
41  
42  
43  
44  
45  
46  
47  
48  
49  
50  
51  
52  
53  
54  
55  
56  
57  
58  
59  
60

For peer review only

1  
2  
3  
4  
5  
6  
7  
8  
9  
10  
11  
12  
13  
14  
15  
16  
17  
18  
19  
20  
21  
22  
23  
24  
25  
26  
27  
28  
29  
30  
31  
32  
33  
34  
35  
36  
37  
38  
39  
40  
41  
42  
43  
44  
45  
46  
47  
48  
49  
50  
51  
52  
53  
54  
55  
56  
57  
58  
59  
60

ula

For peer review only

| ICD-10 code | Term                                                                        |
|-------------|-----------------------------------------------------------------------------|
| N18.3       | Chronic kidney disease, stage 3                                             |
| N18.4       | Chronic kidney disease, stage 4                                             |
| N18.5       | Chronic kidney disease, stage 5                                             |
| N04         | Nephrotic syndrome                                                          |
| N04.0       | Nephrotic syndrome : minor glomerular abnormality                           |
| N04.1       | Nephrotic syndrome : focal and segmental glomerular lesions                 |
| N04.2       | Nephrotic syndrome : diffuse membranous glomerulonephritis                  |
| N04.3       | Nephrotic syndrome : diffuse mesangial proliferative glomerulonephritis     |
| N04.4       | Nephrotic syndrome : diffuse endocapillary proliferative glomerulonephritis |
| N04.5       | Nephrotic syndrome : diffuse mesangiocapillary glomerulonephritis           |
| N04.6       | Nephrotic syndrome : dense deposit disease                                  |
| N04.7       | Nephrotic syndrome : diffuse crescentic glomerulonephritis                  |
| N04.8       | Nephrotic syndrome : other                                                  |
| N04.9       | Nephrotic syndrome : unspecified                                            |
| Z94.0       | Kidney transplant status                                                    |

1  
2 Medcodeid  
3 451442010  
4 453265010  
5 8462251000006117  
6 7024461000006115  
7 8047801000006118  
8 7024441000006119  
9 7024451000006117  
10 8046451000006115  
11 4412421000006113  
12 396394015  
13 303466016  
14 303489012  
15 7617291000006116  
16 7617281000006119  
17 3937821000006118  
18 5992721000006114  
19 5975531000006117  
20 303452014  
21 2475562018  
22 303453016  
23 4170231000006119  
24 7731531000006110  
25 4044018  
26 21289010  
27 52980015  
28 303425016  
29 396392016  
30 451442010  
31 493707012  
32 2576980018  
33 1736361000000112  
34 123999018  
35 396393014  
36 55851000006118  
37 2598551000006118  
38 8242561000006112  
39 3713571000006114  
40 5524681000006114  
41 6941931000006112  
42 5493051000006111  
43 4353661000006114  
44 7875311000006114  
45 7518231000006111  
46 7738891000006115  
47 2754821000006111  
48 7559281000006114  
49 2847631000006117  
50 3515305014  
51 3265651000006112  
52  
53  
54  
55  
56  
57  
58  
59  
60

For peer review only



1 3905811000006110  
2 7868601000006115  
3 7875301000006111  
4 7966981000006110  
5 8032261000006117  
6 6349661000006117  
7 7043971000006117  
8 7559271000006111  
9 7875291000006110  
10 3772081000006115  
11 2962051000006119  
12 7043981000006119  
13 6617771000006112  
14 5992721000006114  
15 3010831000006117  
16 3713561000006119  
17 476611000006116  
18 2579818016  
19 303438012  
20 303781011  
21 906081000006114  
22 353621011  
23 453265010  
24 303393017  
25 303414013  
26 11267010  
27 7743871000006114  
28 4355091000006112  
29 4353651000006112  
30 5006801000006117  
31 2598561000006116  
32 2816681000006110  
33 6947471000006110  
34 3206871000006111  
35 226161000006113  
36 303442010  
37 303439016  
38 303518014  
39 396390012  
40 396391011  
41 7743881000006112  
42 5087011000006114  
43 603321000006118  
44 2935051000006118  
45 2507081000006119  
46 6883751000006115  
47 2962031000006114  
48 3206891000006112  
49 2816671000006112  
50 5086991000006115  
51  
52  
53  
54  
55  
56  
57  
58  
59  
60

For peer review only

1  
2 4787221000006115  
3 4787261000006114  
4 550431000006116  
5 731231000006114  
6 803961000006119  
7  
8 1786709019  
9 303419015  
10 303420014  
11 303433015  
12 303458013  
13  
14 7518221000006113  
15 5152271000006110  
16 221111000000114  
17 353613017  
18 7559261000006116  
19 6941941000006119  
20 2824431000006111  
21 3206901000006111  
22 6947461000006115  
23 2526441000006114  
24 5975531000006117  
25 2753761000006112  
26 3336411000006117  
27 211821000006111  
28 477604016  
29 303435010  
30 3033421000006115  
31 8458711000006115  
32 4353641000006110  
33 4403611000006113  
34 3515307018  
35 4355101000006118  
36 2526451000006111  
37 5493041000006114  
38 1763641000006113  
39 303437019  
40 303440019  
41 7559251000006118  
42 303441015  
43 127487019  
44 303404016  
45 683211000000113  
46 303409014  
47 303410016  
48 553311000006111  
49 557081000006110  
50 3748781000006119  
51 3507191000006112  
52 4787151000006116  
53 8040621000006113  
54  
55  
56  
57  
58  
59  
60

For peer review only

1 8040631000006111  
2 12066941000006110  
3 5086951000006114  
4 12066921000006115  
5 8462251000006117  
6 8467501000006117  
7 7966991000006113  
8 3122251000006114  
9 7024461000006115  
10 8047801000006118  
11 7024441000006119  
12 3312561000006112  
13 7384531000006118  
14 8112141000006113  
15 7024451000006117  
16 12066931000006117  
17 7629961000006118  
18 8462171000006115  
19 7583121000006113  
20 3959541000006116  
21 5086841000006119  
22 4407011000006114  
23 303401012  
24 303515012  
25 69895016  
26 1232261014  
27 5086671000006111  
28 12070031000006113  
29 12061231000006118  
30 3475171000006115  
31 3587281000006119  
32 2516171000006116  
33 3514567013  
34 4787131000006111  
35 3175071000006117  
36 303516013  
37 3122241000006112  
38 288169017  
39 288170016  
40 451124014  
41 286879013  
42 353580016  
43 3514568015  
44 12070041000006115  
45 12061221000006116  
46 8046451000006115  
47 3431801000006116  
48 17930015  
49 5006091000006115  
50 12064771000006114

For peer review only

1  
2 7712041000006110  
3 1680591000006117  
4 5086651000006118  
5 303517016  
6 557071000006112  
7  
8 2146521000000117  
9 7488601000006110  
10 7488591000006119  
11 2146501000000114  
12 1850901000006115  
13  
14 303489012  
15 7300021000006118  
16 7700651000006119  
17 7703061000006115  
18 303465017  
19 396394015  
20 303464018  
21 303466016  
22 8266201000006116  
23  
24  
25  
26  
27  
28  
29  
30  
31  
32  
33  
34  
35  
36  
37  
38  
39  
40  
41  
42  
43  
44  
45  
46  
47  
48  
49  
50  
51  
52  
53  
54  
55  
56  
57  
58  
59  
60

For peer review only

1  
2 Term

3 Oesophageal varices in cirrhosis of the liver  
4 Oesophageal varices in alcoholic cirrhosis of the liver  
5 Hepatic coma due to chronic hepatic failure  
6 Hepatic coma due to chronic hepatitis B  
7 Hepatic coma due to chronic hepatitis B with delta agent  
8 Chronic hepatitis B with hepatic coma  
9 Chronic viral hepatitis B with hepatic coma  
10 Hepatic coma due to chronic hepatitis C  
11 Hepatocellular carcinoma, sarcomatoid  
12 Other sequelae of chronic liver disease  
13 Liver abscess and sequelae of chronic liver disease  
14 Liver abscess and chronic liver disease causing sequelae NOS  
15 Portal hypertension in classical cystic fibrosis  
16 Portal hypertension due to cystic fibrosis  
17 Cerebrohepatorenal syndrome  
18 Esophageal varices in alcoholic cirrhosis of the liver  
19 Esophageal varices in cirrhosis of the liver  
20 Biliary cirrhosis of children  
21 Malignant neoplasm of interlobular biliary canals  
22 Biliary cirrhosis NOS  
23 Obstructive biliary cirrhosis  
24 Primary biliary cirrhosis co-occurrent with systemic scleroderma  
25 Biliary cirrhosis  
26 Secondary biliary cirrhosis  
27 Primary biliary cirrhosis  
28 Capsular portal cirrhosis  
29 Juvenile portal cirrhosis  
30 Oesophageal varices in cirrhosis of the liver  
31 Hypertrophic portal cirrhosis  
32 Portal cirrhosis  
33 Cystic fibrosis related cirrhosis  
34 Congestive cirrhosis  
35 Non-alcoholic cirrhosis NOS  
36 Xanthomatous portal cirrhosis  
37 ICC - Indian childhood cirrhosis  
38 Cirrhosis associated with cystic fibrosis  
39 Congestive cirrhosis  
40 Cirrhosis secondary to cholestasis  
41 Laennec's cirrhosis  
42 Cirrhosis of liver not due to alcohol  
43 Cholangiolitic cirrhosis  
44 Cirrhosis of liver caused by methyl dopa  
45 NAIC - North American Indian childhood cirrhosis  
46 Idiopathic copper associated cirrhosis of liver  
47 Syphilitic cirrhosis  
48 HMDPC - hypermanganesemia with dystonia, polycythaemia and cirrhosis  
49 Micronodular cirrhosis  
50 Cirrhosis of liver with primary sclerosing cholangitis  
51 Blepsias cirrhosisus

1 Postnecrotic cirrhosis  
2  
3 Cardiomyopathy co-occurrent and due to cirrhosis of liver  
4 Cirrhosis of liver caused by amiodarone  
5 Cirrhosis of liver due to chronic hepatitis C  
6 Cirrhosis of liver due to hepatitis B  
7  
8 Early cirrhosis  
9 Drug-induced cirrhosis of liver  
10 HMDPC - hypermanganesemia with dystonia, polycythemia and cirrhosis  
11 Cirrhosis of liver caused by methotrexate  
12  
13 Pigment cirrhosis  
14 Ichthyoparasitism caused by *Vandellia cirrhosa*  
15 Drug-induced hepatic cirrhosis  
16 Bronze cirrhosis  
17 Esophageal varices in alcoholic cirrhosis of the liver  
18 Hanot's cirrhosis  
19 Cardiac cirrhosis  
20 Alcoholic cirrhosis of liver  
21  
22 Laennec's cirrhosis  
23 Cardituberculous cirrhosis  
24 [X]Other and unspecified cirrhosis of liver  
25 [RFC] Cirrhosis  
26  
27 Laennec's cirrhosis, non-alcoholic  
28 Oesophageal varices in alcoholic cirrhosis of the liver  
29 Cirrhosis and chronic liver disease  
30 Unilobular portal cirrhosis  
31 Indian childhood cirrhosis  
32 Decompensated cirrhosis of liver  
33 Latent cirrhosis  
34 Nutritional cirrhosis  
35 Progressive neuronal degeneration without liver cirrhosis  
36 Cirrhosis-familial with pulmonary hypertension  
37 CL - Cirrhosis of liver  
38 Alcoholic liver cirrhosis  
39 Macronodular cirrhosis  
40 Pipe-stem portal cirrhosis  
41 Portal cirrhosis unspecified  
42 Syphilitic portal cirrhosis  
43 Toxic liver disease with fibrosis and cirrhosis of liver  
44 Multilobular portal cirrhosis  
45 Cardiac portal cirrhosis  
46 Decompensated cirrhosis  
47 Hypoxia-associated cirrhosis  
48 Cryptogenic cirrhosis  
49 Posthepatic cirrhosis  
50 Glissonian cirrhosis  
51  
52 Vandellia cirrhosa  
53 Ichthyoparasitism due to *Vandellia cirrhosa*  
54 PNC - Postnecrotic cirrhosis  
55 Hepatic cirrhosis  
56  
57 Laennec cirrhosis, non-alcoholic

1 Pipestem portal cirrhosis  
2 Zooparasitic portal cirrhosis  
3 Childhood function cirrhosis  
4 Macronodular cirrhosis of liver  
5 Glycogenosis with hepatic cirrhosis  
6 Pigmentary cirrhosis of liver  
7 Diffuse nodular cirrhosis  
8 Fatty portal cirrhosis  
9 Pigmentary portal cirrhosis  
10 Portal fibrosis without cirrhosis  
11 North American Indian childhood cirrhosis  
12 Clay pipe-stem cirrhosis  
13 Cirrhosis - non-alcoholic  
14 Cirrhosis of liver  
15 Hypermanganesemia with dystonia, polycythemia, and cirrhosis  
16 PC - Portal cirrhosis  
17 Progressive neuronal degeneration with liver cirrhosis  
18 Multilobar cirrhosis  
19 Alcoholic cirrhosis  
20 Cholangitic cirrhosis  
21 Esophageal varices in cirrhosis of the liver  
22 Mixed micro AND macronodular cirrhosis  
23 Cirrhosis of lung  
24 Postnecrotic cirrhosis of liver  
25 Mixed portal cirrhosis  
26 Toxic portal cirrhosis  
27 Parasitic cirrhosis  
28 Ascites due to alcoholic cirrhosis  
29 Toxic cirrhosis  
30 Acquired portal-systemic shunt due to cirrhosis  
31 Cirrhosis of liver co-occurrent and due to primary sclerosing cholangitis  
32 Advanced cirrhosis  
33 Cholestatic cirrhosis  
34 Cirrhosis, nonalcoholic  
35 Cirrhosis of liver due to cystic fibrosis  
36 Bacterial portal cirrhosis  
37 Zooparasitic portal cirrhosis  
38 Hypermanganesemia with dystonia, polycythaemia, and cirrhosis  
39 Infectious cirrhosis  
40 Chronic hepatitis  
41 Autoimmune chronic active hepatitis  
42 Chronic hepatitis annual review  
43 Chronic hepatitis unspecified  
44 Chronic hepatitis NOS  
45 Chronic aggressive hepatitis  
46 Chronic viral hepatitis, unspecified  
47 CH - Chronic hepatitis  
48 Chronic type B viral hepatitis  
49 CAH - Chronic aggressive hepatitis  
50 Cryoglobulinaemia due to chronic hepatitis C

- 1
- 2 Cryoglobulinemia due to chronic hepatitis C
- 3 Chronic hepatitis C caused by Hepatitis C virus genotype 1
- 4 Drug-induced chronic hepatitis
- 5 Chronic hepatitis C caused by Hepatitis C virus genotype 2
- 6 Hepatic coma due to chronic hepatic failure
- 7
- 8 Hepatic ascites co-occurrent with chronic active hepatitis due to toxic liver disease
- 9 Chronic hepatitis C with stage 4 fibrosis
- 10 Chronic immune tolerant hepatitis B
- 11 Hepatic coma due to chronic hepatitis B
- 12 Hepatic coma due to chronic hepatitis B with delta agent
- 13 Chronic hepatitis B with hepatic coma
- 14 Chronic active type B viral hepatitis
- 15 Chronic hepatitis E
- 16 Chronic hepatitis C with stage 3 fibrosis
- 17 Chronic viral hepatitis B with hepatic coma
- 18 Chronic hepatitis C caused by Hepatitis C virus genotype 4
- 19 Chronic active hepatitis C
- 20 Hepatic ascites due to chronic alcoholic hepatitis
- 21 Chronic hepatitis C with stage 2 fibrosis
- 22 Chronic aggressive viral hepatitis
- 23 Chronic hepatic failure
- 24 Chronic type C viral hepatitis
- 25 Chronic active hepatitis
- 26 Toxic liver disease with chronic persistent hepatitis
- 27 Chronic persistent hepatitis
- 28 Chronic viral hepatitis B
- 29 Chronic non-A non-B hepatitis
- 30 Chronic hepatitis C caused by Hepatitis C virus genotype 1b
- 31 Chronic hepatitis C caused by hepatitis C virus genotype 5
- 32 Chronic persistent viral hepatitis
- 33 Chronic active viral hepatitis
- 34 Chronic aggressive type B viral hepatitis
- 35 Chronic viral hepatitis D
- 36 CAH - Chronic active hepatitis
- 37 CPH - Chronic persistent hepatitis
- 38 Toxic liver disease with chronic lobular hepatitis
- 39 Chronic persistent type B viral hepatitis
- 40 [X]Other chronic viral hepatitis
- 41 [X]Chronic viral hepatitis, unspecified
- 42 Chronic alcoholic hepatitis
- 43 Chronic viral hepatitis B without delta-agent
- 44 Chronic viral hepatitis B with delta-agent
- 45 Chronic infection caused by Hepatitis D virus
- 46 Chronic hepatitis C caused by Hepatitis C virus genotype 1a
- 47 Chronic hepatitis C caused by hepatitis C virus genotype 6
- 48 Hepatic coma due to chronic hepatitis C
- 49 CLH - Chronic lobular hepatitis
- 50 Chronic viral hepatitis
- 51 Chronic hepatocerebral degeneration
- 52 Chronic hepatitis C caused by Hepatitis C virus genotype 3
- 53
- 54
- 55
- 56
- 57
- 58
- 59
- 60



1 Occult chronic type B viral hepatitis  
2 Chronic hepatitis annual review - enhanced services admin  
3 Chronic viral hepatitis B with hepatitis D  
4 Toxic liver disease with chronic active hepatitis  
5 Chronic hepatitis C  
6 Hepatitis C genotype 4  
7 Hepatitis C virus genotype 4  
8 Hepatitis C virus genotype 3  
9 Hepatitis C genotype 3  
10 Reason for influenza vaccine - chronic liver disease  
11 Liver abscess and chronic liver disease causing sequelae NOS  
12 Sequela of chronic liver disease  
13 Chronic alcoholic liver disease  
14 Acute on chronic alcoholic liver disease  
15 Chronic liver disease  
16 Other sequelae of chronic liver disease  
17 Other non-alcoholic chronic liver disease NOS  
18 Liver abscess and sequelae of chronic liver disease  
19 HCV (hepatitis C virus) RNA (ribonucleic acid) measurement by NAAT (nucleic acid amplification test)  
20  
21  
22  
23  
24  
25  
26  
27  
28  
29  
30  
31  
32  
33  
34  
35  
36  
37  
38  
39  
40  
41  
42  
43  
44  
45  
46  
47  
48  
49  
50  
51  
52  
53  
54  
55  
56  
57  
58  
59  
60

|    | ICD-10 code | Term                                                     |
|----|-------------|----------------------------------------------------------|
| 1  |             |                                                          |
| 2  |             |                                                          |
| 3  | b18         | chronic viral hepatitis                                  |
| 4  | b18.0       | chronic viral hepatitis b with delta-agent               |
| 5  | b18.1       | chronic viral hepatitis b without delta-agent            |
| 6  | b18.2       | chronic viral hepatitis c                                |
| 7  | b18.8       | other chronic viral hepatitis                            |
| 8  | b18.9       | chronic viral hepatitis, unspecified                     |
| 9  | k70.2       | alcoholic fibrosis and sclerosis of liver                |
| 10 | k70.3       | alcoholic cirrhosis of liver                             |
| 11 | k70.9       | alcoholic hepatic failure                                |
| 12 | k71.1       | toxic liver disease with hepatic necrosis                |
| 13 | k71.3       | toxic liver disease with chronic persistent hepatitis    |
| 14 | k71.4       | toxic liver disease with chronic lobular hepatitis       |
| 15 | k71.5       | toxic liver disease with chronic active hepatitis        |
| 16 | k71.7       | toxic liver disease with fibrosis and cirrhosis of liver |
| 17 | k72         | hepatic failure, not elsewhere classified                |
| 18 | k72.1       | chronic hepatic failure                                  |
| 19 | k72.9       | hepatic failure, unspecified                             |
| 20 | k73         | chronic hepatitis, not elsewhere classified              |
| 21 | k73.0       | chronic lobular hepatitis, not elsewhere classified      |
| 22 | k73.8       | other chronic hepatitis, not elsewhere classified"       |
| 23 | k73.9       | chronic hepatitis, unspecified                           |
| 24 | k74.0       | hepatic fibrosis                                         |
| 25 | k74.1       | hepatic sclerosis                                        |
| 26 | k74.2       | hepatic fibrosis with hepatic sclerosis                  |
| 27 | k74.3       | primary biliary cirrhosis                                |
| 28 | k74.4       | secondary biliary cirrhosis                              |
| 29 | k74.5       | biliary cirrhosis, unspecified                           |
| 30 | k74.6       | other and unspecified cirrhosis of liver                 |
| 31 |             |                                                          |
| 32 |             |                                                          |
| 33 |             |                                                          |
| 34 |             |                                                          |
| 35 |             |                                                          |
| 36 |             |                                                          |
| 37 |             |                                                          |
| 38 |             |                                                          |
| 39 |             |                                                          |
| 40 |             |                                                          |
| 41 |             |                                                          |
| 42 |             |                                                          |
| 43 |             |                                                          |
| 44 |             |                                                          |
| 45 |             |                                                          |
| 46 |             |                                                          |
| 47 |             |                                                          |
| 48 |             |                                                          |
| 49 |             |                                                          |
| 50 |             |                                                          |
| 51 |             |                                                          |
| 52 |             |                                                          |
| 53 |             |                                                          |
| 54 |             |                                                          |
| 55 |             |                                                          |
| 56 |             |                                                          |
| 57 |             |                                                          |
| 58 |             |                                                          |
| 59 |             |                                                          |
| 60 |             |                                                          |

1  
2 Medcodeid  
3 1009531000006118  
4 1009571000006115  
5 1009611000006113  
6 1009631000006119  
7 1009651000006114  
8 1129781000000117  
9 1158111000000115  
10 1158321000000112  
11 1550051000000113  
12 1741561000006119  
13 3003361000006114  
14 3155151000006112  
15 7282231000006119  
16 7758091000006113  
17 8337561000006119  
18 13697811000006116  
19 296574014  
20 146051000006113  
21 201751000006110  
22 423361000006118  
23 423481000006119  
24 423511000006110  
25 426521000006114  
26 426531000006112  
27 426541000006119  
28 882791000006118  
29 2740341000000113  
30 13624181000006116  
31 127638013  
32 1234038018  
33 1705901000006118  
34 3750051000006112  
35 25776014  
36 63896011  
37 600811000006111  
38 1224941015  
39 3334501000006112  
40 378491010  
41 378497014  
42 1224879014  
43 88291000006114  
44 88301000006110  
45 88311000006113  
46 88321000006117  
47 636711000006113  
48 3334491000006116  
49 4831001000006119  
50 13621171000006117  
51 108541018

1  
2 829441000006116  
3 296995010  
4 696681000006115  
5 696701000006117  
6 3562061000006117  
7 3562141000006117  
8 3729481000006119  
9 10374011  
10 557191000000119  
11 378499012  
12 378500015  
13 239991000006111  
14 315350012  
15 1224880012  
16 88251000006115  
17 88261000006118  
18 88271000006113  
19 2835541000006116  
20 424971000006111  
21 1798621000000119  
22 7375381000006117  
23 7520191000006112  
24 7558801000006110  
25 7791221000006119  
26 53891000006113  
27 7769521000006118  
28 378493013  
29 378494019  
30 2159902018  
31 628281000006114  
32 893481000006117  
33 1009531000006118  
34 1776611000006113  
35 1922491000006113  
36 2376321000000116  
37 2376331000000119  
38 3161041000006119  
39 3161061000006115  
40 1224878018  
41 3528203016  
42 88351000006114  
43 88361000006111  
44 88371000006116  
45 88381000006118  
46 117831000006117  
47 222121000000113  
48 3161031000006112  
49 4830941000006112  
50 68472012  
51 41398015

For peer review only

1  
2 297177019  
3 297179016  
4 297180018  
5 297181019  
6 2674605012  
7  
8 2692565012  
9 299241000000110  
10 300141000000119  
11 315671000000110  
12 641211000000118  
13 641301000000114  
14 695191000006119  
15 699671000000115  
16 699731000000110  
17 699791000000111  
18 699911000000117  
19 905781000006118  
20 908811000006112  
21 983261000006119  
22 983291000006110  
23 983301000006111  
24 983311000006114  
25 114891100000120  
26 167412100000120  
27 167438100000110  
28 167466100000120  
29 167497100000120  
30 167505100000110  
31 1679791000006110  
32 1682241000006110  
33 1747821000006120  
34 1747831000006120  
35 1747851000006110  
36 1747861000006110  
37 175743100000110  
38 1855101000006110  
39 1858501000006110  
40 1863341000006120  
41 226293100000120  
42 2894411000006110  
43 3865621000006110  
44 3865631000006110  
45 4769281000006110  
46 5006891000006110  
47 5006901000006110  
48 5006911000006110  
49 5006921000006120  
50 5552111000006120  
51 7045281000006110  
52 7058051000006120  
53  
54  
55  
56  
57  
58  
59  
60

For peer review only

1  
2 7092351000006110  
3 7510741000006110  
4 7567771000006120  
5 7861151000006120  
6 11300012  
7 23820010  
8 73622018  
9 148427014  
10 178739011  
11 251269010  
12 251644018  
13 264629018  
14 264630011  
15 264631010  
16 264634019  
17 264637014  
18 264638016  
19 264639012  
20 264640014  
21 264645016  
22 297266016  
23 297267013  
24 297281010  
25 297282015  
26 297283013  
27 297284019  
28 297289012  
29 297290015  
30 297295013  
31 297296014  
32 297300010  
33 297302019  
34 297303012  
35 297311019  
36 297312014  
37 297313016  
38 297314010  
39 297315011  
40 297321010  
41 297324019  
42 297325018  
43 297330019  
44 299334015  
45 299336018  
46 299337010  
47 299345017  
48 345225017  
49 345275015  
50 345311015  
51 345318014  
52  
53  
54  
55  
56  
57  
58  
59  
60

For peer review only

1  
2 345321011  
3 345323014  
4 345345010  
5 399395015  
6 399408014  
7  
8 450602015  
9 450603013  
10 453344019  
11 459233015  
12 459234014  
13  
14 472410017  
15 472411018  
16 477355017  
17 478024019  
18 495804010  
19 500033015  
20 512000013  
21 1489345013  
22 1780267013  
23 1780375016  
24 2159216019  
25 2159223018  
26 2159225013  
27 2159227017  
28 2159274014  
29 2474650018  
30 2478828012  
31 2533403014  
32 2548491016  
33 2550890017  
34 2692343011  
35 3506708010  
36 3511291019  
37 10791000006116  
38 103531000006110  
39 125721000006111  
40 137801000000112  
41 138671000000116  
42 138681000000119  
43 138691000000117  
44 138701000000117  
45 139021000000118  
46 139161000000110  
47 141981000000118  
48 141991000000116  
49 142041000000115  
50 142051000000117  
51 148591000006114  
52 154851000000115  
53 166001000000113  
54  
55  
56  
57  
58  
59  
60

For peer review only

1  
2 223811000000118  
3 230321000006117  
4 245341000006117  
5 245351000006115  
6 245361000006118  
7  
8 301541000000116  
9 307861000000113  
10 307881000000116  
11 307901000000118  
12  
13 362161000006110  
14 363451000006114  
15 379901000006113  
16 405571000006113  
17 406781000000119  
18  
19 425631000006118  
20 647301000006112  
21 736371000006112  
22 743461000006119  
23  
24 800721000006115  
25 851121000006117  
26 883041000006118  
27 897431000006113  
28 905881000006111  
29 916571000006117  
30 918541000006112  
31 918551000006114  
32 918561000006111  
33 918591000006115  
34 918601000006111  
35 931251000006112  
36 931711000006118  
37  
38 1013171000006112  
39 1013181000006110  
40 1013191000006113  
41 1175991000000119  
42 1176031000000114  
43 1176071000000111  
44 1176241000000114  
45 1176301000000117  
46 1176341000000119  
47 1176381000000110  
48 1673671000006116  
49 1699591000006112  
50 1699611000006118  
51 1741271000006111  
52 1741281000006114  
53 1776671000006116  
54 1855731000006116  
55 1855741000006114  
56 1855761000006113

For peer review only



1  
2 1856761000006115  
3 1856771000006110  
4 1856781000006113  
5 1856791000006111  
6 1932071000006116  
7 1986841000006113  
8 2014871000006119  
9 2112801000000117  
10 2297411000000115  
11 2444841000000117  
12 2466801000000118  
13 2502351000006114  
14 2502391000006115  
15 2587911000000119  
16 2589101000000111  
17 2612111000006116  
18 2612121000006112  
19 2721471000006114  
20 2811081000006110  
21 3093151000006111  
22 3093161000006113  
23 3093171000006118  
24 3210941000006113  
25 3210951000006110  
26 3323851000006114  
27 3668321000006119  
28 3668331000006116  
29 3668341000006114  
30 3719651000006117  
31 3719661000006115  
32 3759931000006112  
33 3796891000006117  
34 3796901000006118  
35 3878481000006113  
36 3878491000006111  
37 3878501000006115  
38 4052921000006118  
39 4540141000006110  
40 4755771000006114  
41 4769541000006119  
42 4769611000006117  
43 4769641000006118  
44 4948491000006116  
45 5007101000006111  
46 5007121000006118  
47 5007131000006115  
48 5007171000006117  
49 5007261000006117  
50 5007321000006116  
51 5007351000006113

For peer review only

1  
2 5007361000006110  
3 5007541000006119  
4 5007551000006117  
5 5007621000006113  
6 5007661000006119  
7  
8 5007771000006116  
9 5007781000006118  
10 5007811000006116  
11 5007871000006113  
12  
13 5007941000006110  
14 5007971000006119  
15 5008031000006115  
16 5008101000006110  
17 5008211000006119  
18 5008231000006113  
19  
20 5023531000006114  
21 5067711000006114  
22 5192381000006111  
23 5300251000006119  
24 5300261000006117  
25 5300371000006115  
26 5614161000006114  
27 6028641000006114  
28 6369851000006112  
29 6908751000006116  
30 6997451000006113  
31 7069151000006119  
32 7220531000006114  
33 7265381000006118  
34 7306821000006113  
35 7306831000006111  
36 7512471000006111  
37 7758091000006113  
38 7840671000006115  
39 7861341000006115  
40 7863641000006114  
41 7863681000006115  
42 7952761000006111  
43 7955181000006111  
44 8024691000006119  
45 8025071000006110  
46 8029441000006110  
47 8031611000006111  
48 8053261000006111  
49 8056521000006114  
50 8079791000006114  
51 8089731000006115  
52 8191681000006117  
53 8214791000006114  
54 8259581000006110  
55  
56  
57  
58  
59  
60

For peer review only

1  
2 8260981000006117  
3 8289731000006113  
4 8289831000006117  
5 8289881000006116  
6 8313881000006113  
7  
8 11639661000006111  
9 11831381000006119  
10 12076991000006114  
11 13491221000006117  
12 13493091000006112  
13 13493111000006115  
14 13493431000006116  
15 13495041000006116  
16 13499471000006116  
17 13500261000006114  
18 13503061000006114  
19 13572191000006116  
20 13572931000006117  
21 13573141000006116  
22 13622561000006113  
23 13632801000006112  
24 13637841000006111  
25 13686241000006115  
26 13686271000006111  
27 13950881000006118  
28 14055041000006118  
29 300366019  
30 449935012  
31 451371010  
32 1212072018  
33 1227591017  
34 2474330011  
35 2476091017  
36 2548554013  
37 3509817019  
38 3521990012  
39 138981000000113  
40 139081000000117  
41 139091000000115  
42 149571000006118  
43 162111000000112  
44 306621000000116  
45 371641000000112  
46 426321000006116  
47 524511000006116  
48 907581000006119  
49 907591000006116  
50 908801000006114  
51 928621000006111  
52 966981000006112

For peer review only

1  
2 968341000006116  
3 1716631000000115  
4 1757281000006116  
5 1784651000006110  
6 1863321000006113  
7 1992451000006114  
8 1994761000006112  
9 2008521000006110  
10 2008601000006116  
11 2901571000006113  
12 3142511000006112  
13 4057041000006110  
14 4193641000006111  
15 5011071000006114  
16 5011081000006112  
17 5011111000006118  
18 5011121000006114  
19 5011141000006119  
20 5011461000006111  
21 5011471000006116  
22 5011871000006119  
23 5960821000006117  
24 5960951000006117  
25 5960971000006110  
26 6348291000006115  
27 6348301000006119  
28 6349401000006115  
29 6837051000006119  
30 6846141000006118  
31 6990981000006114  
32 6990991000006112  
33 7071911000006114  
34 7703601000006113  
35 7855631000006111  
36 7861341000006115  
37 8014911000006110  
38 8026451000006117  
39 8044481000006118  
40 8196061000006110  
41 8264201000006110  
42 8265471000006116  
43 8453031000006117  
44 8453821000006113  
45 9912271000006112  
46 13718641000006112  
47 13909861000006114  
48 13909881000006116  
49 13909891000006118  
50 13909901000006119  
51 14182621000006113

For peer review only

1  
2 14194161000006118  
3 14194651000006114  
4 14194811000006114  
5 264499015  
6 411416011  
7 413750011  
8 3508956015  
9 3508962013  
10 3508965010  
11 3516948016  
12 122361000006113  
13 122401000006115  
14 884521000006115  
15 884531000006117  
16 940051000006114  
17 940061000006111  
18 940071000006116  
19 940081000006118  
20 1160471000000111  
21 1682791000006112  
22 1726581000006116  
23 2115821000000118  
24 2118011000000114  
25 2126181000000114  
26 2127781000000110  
27 2539131000006116  
28 5010981000006119  
29 5011451000006114  
30 5866391000006119  
31 5866401000006117  
32 7568281000006111  
33 7597121000006117  
34 7618821000006118  
35 8195431000006118  
36 8274811000006116  
37 300312010  
38 300313017  
39 300321011  
40 300322016  
41 300411016  
42 300941014  
43 395780010  
44 451133011  
45 451134017  
46 267321000006114  
47 370701000006118  
48 542251000006112  
49 542261000006114  
50 543141000006110  
51 841051000006113

For peer review only

1  
2 1573101000006112  
3 1576261000006112  
4 1900601000006111  
5 1900651000006110  
6 2436731000000112  
7 2729551000000111  
8 2729571000000119  
9 5011041000006118  
10 5011051000006116  
11 5011061000006119  
12 5011091000006110  
13 5011101000006116  
14 5011131000006112  
15 5011291000006119  
16 5011331000006114  
17 5011351000006119  
18 5582311000006110  
19 7598981000006119  
20 7599001000006116  
21 7839991000006115  
22 8011371000006117  
23 296995010  
24 405339016  
25 1227592012  
26 3508952018  
27 3508955016  
28 3508958019  
29 3508961018  
30 3508964014  
31 3509777019  
32 3509790014  
33 3509794017  
34 3509799010  
35 3509810017  
36 3636133016  
37 605461000006117  
38 605481000006110  
39 605491000006113  
40 809421000006116  
41 1716621000000117  
42 1773371000006117  
43 4778181000006119  
44 4778201000006118  
45 5649201000006113  
46 7519441000006112  
47 13717171000006112  
48 13718601000006110  
49 13718621000006117  
50 14014251000006116  
51 14194191000006114

For peer review only

1  
2 14194211000006110  
3 14194281000006115  
4 14194331000006112  
5 14194491000006118  
6 14194571000006115  
7 14194611000006113  
8 14194641000006112  
9 14194661000006111  
10 14194741000006118  
11 14194801000006111  
12 14194841000006113  
13 14194941000006115  
14 14194971000006111  
15  
16 300370010  
17 300371014  
18 411518010  
19 1780304018  
20 605501000006117  
21 909171000006115  
22 21256010  
23 26545010  
24 251625013  
25 294635013  
26 294637017  
27 294638010  
28 294641018  
29 294642013  
30 294643015  
31 294644014  
32 294645010  
33 294646011  
34 294647019  
35 294648012  
36 294652012  
37 294653019  
38 294654013  
39 294655014  
40 294656010  
41 294688019  
42 294718018  
43 295668011  
44 295671015  
45 295672010  
46 295680015  
47 295681016  
48 295684012  
49 295685013  
50 295686014  
51 295687017  
52 295688010

For peer review only

1  
2 295690011  
3 295713019  
4 295714013  
5 346929012  
6 401760017  
7 497559016  
8 3635492010  
9 3636474012  
10  
11 148381000006115  
12 294111000000119  
13 294321000000111  
14 359081000006118  
15 359101000006114  
16 359141000006111  
17 359151000006113  
18 359241000006119  
19 362941000006113  
20 363021000006113  
21 363791000006112  
22 376531000006119  
23 376541000006112  
24 376571000006116  
25 376631000006115  
26 398571000006112  
27 399031000006111  
28 406841000000115  
29 407461000000119  
30 408361000000111  
31 408401000000119  
32 408421000000111  
33 408461000000115  
34 408481000000112  
35 408501000000115  
36 423221000006117  
37 423351000006115  
38 423381000006111  
39 423391000006114  
40 425901000006116  
41 428201000006119  
42 431681000006117  
43 431691000006119  
44 696161000006115  
45 882171000006115  
46 882181000006117  
47 882191000006119  
48 882201000006116  
49 882211000006118  
50 914921000006117  
51 914931000006119  
52 914941000006112

For peer review only



1  
2 914951000006114  
3 915111000006112  
4 915121000006116  
5 939491000006118  
6 999961000006114  
7  
8 1823871000006112  
9 1834091000006117  
10 1856601000006111  
11 1856611000006114  
12 1856631000006115  
13 1916981000006111  
14 1932091000006115  
15 1933001000006115  
16 1949611000006114  
17 1949621000006118  
18 1949631000006115  
19 1949641000006113  
20 1949651000006110  
21 1949661000006112  
22 1949671000006117  
23 1949681000006119  
24 1949691000006116  
25 1949701000006116  
26 1949711000006118  
27 1949721000006114  
28 1949761000006115  
29 1949771000006110  
30 1950501000006117  
31 1950571000006111  
32 1950641000006119  
33 1950651000006117  
34 1950731000006115  
35 1950781000006119  
36 1969651000006118  
37 1971401000006111  
38 1971541000006114  
39 1971661000006114  
40 1971701000006118  
41 1971771000006112  
42 1972021000006119  
43 1972041000006114  
44 1972061000006113  
45 1972071000006118  
46 1972081000006115  
47 1972131000006115  
48 1972141000006113  
49 1972171000006117  
50 1972181000006119  
51 1972191000006116  
52 1972201000006118

For peer review only

1  
2 1972211000006115  
3 1972231000006114  
4 1972251000006119  
5 1972291000006113  
6 1972311000006112  
7  
8 1972341000006111  
9 1972371000006115  
10 1972401000006117  
11 1972431000006113  
12 1972451000006118  
13 1972471000006111  
14 1972481000006114  
15 1972501000006116  
16 1972571000006110  
17 1972661000006119  
18 1972681000006112  
19 1972711000006113  
20 1972731000006119  
21 1972751000006114  
22 1972791000006115  
23 1972821000006112  
24 1972831000006110  
25 1972871000006113  
26 1972911000006111  
27 1972931000006117  
28 1973171000006112  
29 1973221000006118  
30 1973271000006117  
31 1973341000006118  
32 1973381000006112  
33 1973401000006112  
34 1973461000006113  
35 1973531000006117  
36 1973711000006116  
37 1973941000006119  
38 1974271000006119  
39 1974931000006114  
40 1975591000006119  
41 1976091000006118  
42 1976831000006111  
43 2127581000000115  
44 2221421000000114  
45 2248021000000110  
46 2284371000000110  
47 2290431000000110  
48 2345801000000113  
49 2345881000000115  
50 2345931000000111  
51 2403101000000116  
52 2439591000000113

For peer review only

1  
2 2439631000000113  
3 2439671000000110  
4 2439711000000111  
5 2445471000000112  
6 2445691000000113  
7 2451471000000113  
8 2502971000006115  
9 2575731000006115  
10 2603271000006110  
11 2620431000000115  
12 2620471000000118  
13 2649061000006115  
14 2664611000006117  
15 2729791000000114  
16 2742971000000119  
17 2742991000000115  
18 2743011000000119  
19 2912321000006113  
20 2929931000006112  
21 2931251000006113  
22 3414231000006117  
23 3414251000006112  
24 3511181000006115  
25 3575041000006117  
26 3653671000006113  
27 3802651000006111  
28 3964661000006114  
29 4539871000006116  
30 5005421000006117  
31 5005601000006112  
32 5005871000006119  
33 5005881000006116  
34 5618261000006114  
35 5618271000006119  
36 6024061000006111  
37 6024071000006116  
38 6348031000006112  
39 6348061000006115  
40 6452391000006116  
41 6897211000006117  
42 6897241000006118  
43 6897251000006116  
44 6897271000006114  
45 6900181000006114  
46 6900201000006110  
47 6900221000006117  
48 6900241000006112  
49 6973421000006116  
50 6973461000006110  
51 7043651000006119

For peer review only

1  
2 7043661000006117  
3 7263021000006116  
4 7510731000006118  
5 7510741000006111  
6 7511421000006118  
7  
8 7560531000006110  
9 7710381000006117  
10 7755121000006115  
11 7840631000006118  
12  
13 7843521000006113  
14 7863681000006115  
15 7874771000006117  
16 7955111000006116  
17 7955161000006118  
18 7969281000006110  
19 7969371000006115  
20 8009521000006114  
21 8009531000006112  
22 8010111000006117  
23 8014401000006116  
24 8024201000006111  
25 8024641000006111  
26 8024691000006119  
27 8028391000006119  
28 8031751000006119  
29 8031761000006117  
30 8031771000006112  
31 8042791000006116  
32 8042801000006115  
33 8089231000006110  
34 8089241000006117  
35 8214731000006110  
36 11930781000006119  
37 12106351000006118  
38 12106371000006111  
39 12106381000006114  
40 12106391000006112  
41 12116721000006112  
42 12370641000006110  
43 12370651000006112  
44 12370661000006114  
45 12626321000006119  
46 12734321000006118  
47 13934381000006118  
48  
49 76484016  
50 294660013  
51 317932013  
52 401757012  
53 401759010  
54 402397010

For peer review only

1 402429016  
2 411950013  
3 1222549013  
4 292111000006117  
5 359091000006115  
6 359161000006110  
7 882941000006113  
8 45046017  
9 299325013  
10 499946014  
11 500317011  
12 363031000006111  
13 363041000006118  
14 905791000006115  
15 1576281000006119  
16 1909771000006119  
17 2931231000006118  
18 2931241000006111  
19 3802621000006119  
20 5005501000006111  
21 5005521000006118  
22 5005541000006113  
23 5005561000006112  
24 5005581000006119  
25 5005691000006117  
26 5005711000006119  
27 7834071000006116  
28 8030791000006119  
29 8032911000006111  
30 8032931000006117  
31 8044911000006116  
32 8044941000006117  
33 8044981000006111  
34 145513018  
35 297130012  
36 345068012  
37 486695013  
38 905801000006119  
39 908821000006116  
40 3101701000006120  
41 3101721000006110  
42 3875981000006110  
43 52463013  
44 93019012  
45 133866014  
46 143230018  
47 301719013  
48 311616019  
49 311696015  
50 311702015

For peer review only

1  
2 312580013  
3 312591018  
4 359459016  
5 1776211019  
6 1784692011  
7  
8 376791000006111  
9 614691000006113  
10 3676291000006116  
11 5128181000006118  
12 5128191000006115  
13 5141001000006116  
14 5141031000006112  
15 7284941000006112  
16 7559371000006119  
17 13991601000006111  
18 33622011  
19 64875013  
20 81717011  
21 295688010  
22 297037012  
23 297043014  
24 299312017  
25 299313010  
26 299314016  
27 299321016  
28 299323018  
29 345121017  
30 2841061014  
31 151951000006115  
32 151961000006118  
33 244311000006117  
34 630491000006110  
35 636681000000117  
36 882961000006112  
37 905821000006112  
38 909021000006117  
39 1148731000000112  
40 1776901000006117  
41 1925611000006114  
42 2269041000000116  
43 3028151000006111  
44 3293631000006118  
45 3293641000006111  
46 3293651000006113  
47 3293661000006110  
48 3511181000006115  
49 7043651000006119  
50 7043661000006117  
51 7289421000006111  
52 7560531000006110

For peer review only

1  
2 7730811000006111  
3 7730821000006115  
4 7790241000006117  
5 7803921000006111  
6 7831581000006114  
7 7838691000006117  
8 8031751000006119  
9 8031761000006117  
10 8031771000006112  
11 8031771000006112  
12 13625531000006110  
13  
14 52052015  
15 251539016  
16 264417019  
17 286639018  
18 286641017  
19 286642012  
20 286643019  
21 286644013  
22 286645014  
23 288115019  
24 288116018  
25 296841018  
26 296884017  
27 311933012  
28 311934018  
29 311935017  
30 311936016  
31 311937013  
32 311938015  
33 311939011  
34 311940013  
35 311941012  
36 311942017  
37 311943010  
38 311944016  
39 348287011  
40 499948010  
41 1221108018  
42 1777666018  
43 221361000006118  
44 301341000006119  
45 426301000006114  
46 640991000006117  
47 3001451000006118  
48 4177151000006119  
49 4177161000006117  
50 6597811000006119  
51 6597831000006113  
52 124598014  
53 206411014  
54  
55  
56  
57  
58  
59  
60

For peer review only

1  
2 297233015  
3 297234014  
4 297238012  
5 297239016  
6 299393011  
7 299394017  
8 345771011  
9 345773014  
10 345780011  
11 411453017  
12 411454011  
13 451123015  
14 2475877015  
15 3509879014  
16 497021000006113  
17 543071000006115  
18 761411000006111  
19 907241000006111  
20 907411000006113  
21 1815931000006114  
22 1815951000006119  
23 1815971000006112  
24 1815981000006110  
25 2122001000000116  
26 2283041000000116  
27 2283831000000117  
28 2326271000000114  
29 3200341000006112  
30 3288331000006116  
31 3445431000006112  
32 3445451000006117  
33 4769391000006119  
34 5012421000006114  
35 5614181000006116  
36 7557921000006113  
37 7557961000006119  
38 7557971000006114  
39 12465281000006112  
40  
41  
42  
43  
44  
45  
46  
47  
48  
49  
50  
51  
52  
53  
54  
55  
56  
57  
58  
59  
60

For peer review only



1  
2 Term

3 Cause of learning disabilities: Down's syndrome

4 Cause of learning disabilities: Fragile X syndrome

5 Cause of learning disabilities: Microcephaly

6 Cause of learning disabilities: Prader-Willi syndrome

7 Cause of learning disabilities: Rett syndrome

8 Severe learning disability

9 Preferred place of care - learning disability unit

10 Preferred place of death: learning disability unit

11 Profound learning disability

12 Excepted from learning disability quality indicators - patient unsuitable

13 Profound learning disability

14 Severe learning disability

15 Nonverbal learning disorder

16 X-linked epilepsy with learning disability and behaviour disorder syndrome

17 Significant learning disability

18 Significant learning disability

19 [X]Severe mental retardation, other impairments of behaviour

20 Severe mental retardation, IQ in range 20-34

21 Profound mental retardation with IQ less than 20

22 [X]Prfnd mental retardation without mention impairment behav

23 [X]Profound ment retard sig impairmnt behav req attent/treat

24 [X]Profound mental retardation, other impairments of behavr

25 [X]Sev mental retard sig impairment behav req attent/treatmt

26 [X]Sev mental retard with statement no or min impairm behav

27 [X]Sev mental retardation without mention impairment behav

28 Severe mental retardation

29 Severe mental retardation without significant impairment of behaviour

30 Infantile spasms, psychomotor retardation, progressive brain atrophy, basal ganglia disease syndrome

31 Angelman syndrome

32 Angelman's syndrome

33 Angelman syndrome

34 Angelman syndrome

35 Coffin-Lowry syndrome

36 Cornelia de Lange syndrome

37 Cri du chat syndrome

38 Dubowitz syndrome

39 Edwards syndrome

40 Pseudotrismy 18

41 Partial trisomy 18 in Edward's syndrome

42 Trisomy 18 NOS

43 Trisomy 18, meiotic nondisjunction

44 Trisomy 18, mitotic nondisjunction

45 Trisomy 18 - mitotic nondisjunction mosaicism

46 Trisomy 18, translocation

47 Edward's syndrome - trisomy 18

48 Complete trisomy 18 syndrome

49 Trisomy 18 - meiotic nondisjunction

50 Distal trisomy 18q

51 Hurler's syndrome

1 Hurler's syndrome  
2 Cerebral degeneration in mucopolysaccharidoses  
3 Mucopolysaccharidosis, type 1  
4 Mucopolysaccharidosis type III  
5 Mucopolysaccharidosis, MPS-I-H  
6 Mucopolysaccharidosis type I-H  
7 Mucopolysaccharidosis, MPS-I  
8 Laurence-Moon-Biedl syndrome  
9 Mowat-Wilson syndrome  
10 Patau's syndrome NOS  
11 Partial trisomy 13 in Patau's syndrome  
12 Patau syndrome  
13 Trisomy 13, meiotic nondisjunction  
14 Trisomy 13 NOS  
15 Trisomy 13, mitotic nondisjunction  
16 Trisomy 13 - mitotic nondisjunction mosaicism  
17 Trisomy 13, translocation  
18 Complete trisomy 13 syndrome  
19 Rett syndrome  
20 Chromosome 4q deletion syndrome  
21 Chromosome 3p deletion syndrome  
22 Chromosome 1p36 deletion syndrome  
23 Chromosome 2q37 deletion syndrome  
24 Chromosome Xp11.3 microdeletion syndrome  
25 Wolff - Hirschorn syndrome  
26 Wolf Hirschhorn syndrome  
27 Down's syndrome NOS  
28 Partial trisomy 21 in Down's syndrome  
29 Suspected Downs syndrome  
30 Down's syndrome  
31 Down's syndrome  
32 Cause of learning disabilities: Down's syndrome  
33 Reason for referral: Downs Syndrome  
34 Down syndrome body mass index centile  
35 Down's syndrome height centile  
36 Down's syndrome weight centile  
37 Down syndrome  
38 Downs syndrome  
39 Trisomy 21 NOS  
40 Trisomy 21  
41 Trisomy 21, meiotic nondisjunction  
42 Trisomy 21, mitotic nondisjunction  
43 Trisomy 21- mitotic nondisjunction mosaicism  
44 Trisomy 21, translocation  
45 Suspect trisomy 21 foetus  
46 Trisomy 21  
47 Complete trisomy 21 syndrome  
48 Trisomy 21- meiotic nondisjunction  
49 Mongolism  
50 Multiple sclerosis

1 Multiple sclerosis of the spinal cord  
2 Generalised multiple sclerosis  
3 Exacerbation of multiple sclerosis  
4 Multiple sclerosis NOS  
5 Secondary progressive multiple sclerosis  
6 Primary progressive multiple sclerosis  
7 Multiple sclerosis review  
8 Multiple sclerosis care plan agreed  
9 Multiple sclerosis multidisciplinary review  
10 Benign multiple sclerosis  
11 Malignant multiple sclerosis  
12 Multiple sclerosis of the brain stem  
13 Management of multiple sclerosis in onset phase  
14 Management of multiple sclerosis in early disease phase  
15 Management of multiple sclerosis in stable disability phase  
16 Management of multiple sclerosis in palliative phase  
17 [RFC] Multiple sclerosis  
18 [RFC] Multiple sclerosis  
19 Multiple sclerosis - personal health plan  
20 Multiple sclerosis - primary progressive  
21 Multiple sclerosis - secondary progressive  
22 Multiple sclerosis - relapsing remitting  
23 Multiple sclerosis review declined  
24 Multiple sclerosis monitoring administration  
25 Multiple sclerosis monitoring first letter  
26 Multiple sclerosis monitoring second letter  
27 Multiple sclerosis monitoring telephone invitation  
28 Multiple sclerosis monitoring third letter  
29 Management of multiple sclerosis in progressive disability phase  
30 Relapsing remitting multiple sclerosis  
31 Multiple sclerosis monitoring administration  
32 Multiple sclerosis monitoring first letter  
33 Multiple sclerosis monitoring third letter  
34 Multiple sclerosis monitoring telephone invite  
35 Referral to community multiple sclerosis team  
36 Multiple sclerosis questionnaire completed  
37 Suspected multiple sclerosis  
38 Referral by Multiple Sclerosis nurse specialist  
39 Suspected multiple sclerosis  
40 MS - Multiple sclerosis  
41 Acute disseminated encephalomyelitis  
42 ADEM - Acute disseminated encephalomyelitis  
43 Multiple sclerosis of the brainstem  
44 Acute relapsing multiple sclerosis  
45 Chronic progressive multiple sclerosis  
46 Multiple sclerosis (MS) chronic/progressive  
47 Remittent-progressive multiple sclerosis  
48 Kurtzke multiple sclerosis rating scale  
49 Multiple sclerosis (MS) secondary progressive  
50 Multiple sclerosis (MS) relapsing remitting

1  
2 Multiple sclerosis (MS) primary progressive  
3 Dementia associated with multiple sclerosis  
4 Multiple sclerosis clinic  
5 Progressive relapsing multiple sclerosis  
6 Juvenile myoclonic epilepsy  
7 Status epilepticus  
8 Benign Rolandic epilepsy  
9 Gelastic epilepsy  
10 Epilepsy  
11 Witnessed epileptic seizure  
12 H/O: epilepsy  
13 Epilepsy monitoring  
14 Initial epilepsy assessment  
15 Follow-up epilepsy assessment  
16 Epilepsy associated problems  
17 Epilepsy drug side effect  
18 Epilepsy treatment changed  
19 Epilepsy treatment started  
20 Epilepsy treatment stopped  
21 Epilepsy monitoring NOS  
22 Epileptic seizures - atonic  
23 Epileptic seizures - akinetic  
24 Neonatal myoclonic epilepsy  
25 Epileptic seizures - clonic  
26 Epileptic seizures - myoclonic  
27 Epileptic seizures - tonic  
28 Other specified generalised convulsive epilepsy  
29 Generalised convulsive epilepsy NOS  
30 Partial epilepsy with impairment of consciousness  
31 Temporal lobe epilepsy  
32 Psychosensory epilepsy  
33 Epileptic automatism  
34 Partial epilepsy with impairment of consciousness NOS  
35 Somatosensory epilepsy  
36 Partial epilepsy with autonomic symptoms  
37 Visceral reflex epilepsy  
38 Visual reflex epilepsy  
39 Unilateral epilepsy  
40 Kojevnikov's epilepsy  
41 Other forms of epilepsy  
42 Cursive (running) epilepsy  
43 Other forms of epilepsy NOS  
44 [X]Other generalized epilepsy and epileptic syndromes  
45 [X]Other epilepsy  
46 [X]Other status epilepticus  
47 [X]Status epilepticus, unspecified  
48 Focal epilepsy  
49 Juvenile absence epilepsy  
50 Severe myoclonic epilepsy in infancy  
51 Drug-induced epilepsy

1 Menstrual epilepsy  
2 Nocturnal epilepsy  
3 Complex partial status epilepticus  
4 Progressive myoclonic epilepsy  
5 Epilepsy NOS  
6 Motor epilepsy  
7 Jacksonian, focal or motor epilepsy  
8 Epileptic seizure  
9 Epilepsy control good  
10 Epilepsy control poor  
11 Tonic-clonic epilepsy  
12 Grand mal epilepsy  
13 Psychomotor epilepsy  
14 Alcohol-induced epilepsy  
15 Pykno-epilepsy  
16 Generalised convulsive epilepsy  
17 Photosensitive epilepsy  
18 Transient epileptic amnesia  
19 Epilepsy medication review  
20 Epilepsy care arrangement  
21 Epilepsy severity  
22 Emergency epilepsy treatment since last appointment  
23 Suspected epilepsy  
24 Epilepsy confirmed  
25 Complex partial epileptic seizure  
26 Stress-induced epilepsy  
27 Traumatic epilepsy  
28 No epilepsy drug side effects  
29 Epilepsy monitoring verbal invite  
30 Generalised non-convulsive epilepsy  
31 Seen in epilepsy clinic  
32 Pyridoxine-dependent epilepsy  
33 Recurrent complex partial epilepsy  
34 Other specified generalised nonconvulsive epilepsy  
35 Tonic-clonic epilepsy  
36 Status epilepticus, unspecified  
37 Epilepsy limits activities  
38 Epilepsy screening administration  
39 Epilepsy screening first invitation  
40 Epilepsy screening second invitation  
41 Epilepsy screening third invitation  
42 Exception reporting - epilepsy quality indicators  
43 Excepted from epilepsy quality indicators - informed dissent  
44 Epilepsy restricts employment  
45 Epilepsy prevents employment  
46 Epilepsy does not limit activities  
47 Epilepsy management plan given  
48 Sensory induced epilepsy  
49 Epilepsy impairs education  
50 Did not attend epilepsy clinic

1  
2 Generalised epilepsy  
3 Petit mal (minor) epilepsy  
4 Localisation-related epilepsy  
5 Partial epilepsy  
6 Partial epilepsy without impairment of consciousness OS  
7 Simple partial epileptic seizure  
8 Epilepsy monitoring call first letter  
9 Epilepsy monitoring call second letter  
10 Epilepsy monitoring call third letter  
11 Acquired epileptic aphasia  
12 [X]Antiepilept + antiparksn drug caus advers eff therap use  
13 [X]Epileptic psychosis NOS  
14 Antiepileptic adverse reaction  
15 Epilepsy monitoring telephone invite  
16 [X]Schizophrenia-like psychosis in epilepsy  
17 Epileptic absences  
18 Localization-related(focal)(partial)idiopathic epilepsy and epileptic syndromes with seizures of localised onset  
19 Limbic system epilepsy  
20 Generalised nonconvulsive epilepsy NOS  
21 Partial epilepsy  
22 Petit mal epilepsy  
23 Post traumatic epilepsy  
24 [RFC] Epilepsy/convulsion  
25 Epilepsy monitoring  
26 Initial epilepsy assessment  
27 Follow-up epilepsy assessment  
28 Epilepsy associated problems  
29 Epilepsy drug side effects  
30 Nocturnal epilepsy  
31 Excepted from epilepsy quality indicators - patient unsuitable  
32 Early infantile epileptic encephalopathy with suppression bursts  
33 Adverse reaction to Antiepileptics  
34 Adverse reaction to Drugs Used In Control Of Epilepsy  
35 Adverse reaction to Drugs Used In Status Epilepticus  
36 Contraceptive advice for patients with epilepsy  
37 Pre-conception advice for patients with epilepsy  
38 Pregnancy advice for patients with epilepsy  
39 Pregnancy advice for patients with epilepsy not indicated  
40 Contraceptive advice for patients with epilepsy declined  
41 Pre-conception advice for patients with epilepsy declined  
42 Pregnancy advice for patients with epilepsy declined  
43 Epilepsy treatment continued  
44 Epilepsy monitoring call first letter  
45 Epilepsy monitoring call third letter  
46 Contraceptive advice for patients with epilepsy not indicated  
47 Pre-conception advice for patients with epilepsy not indicated  
48 Reason for referral: Epilepsy  
49 Epilepsy monitoring administration  
50 Epilepsy monitoring in primary care  
51 Epilepsy monitoring in secondary care

1  
2 Epilepsy treatment compliance  
3 Epilepsy treatment compliance good  
4 Epilepsy treatment compliance poor  
5 Epilepsy monitoring default  
6  
7 3D study - problems with epilepsy management  
8 Provision of information about SUDEP (sudden unexpected death in epilepsy)  
9 Contraceptive advice for patients on valproate for epilepsy  
10 Referral to epilepsy clinic  
11 Referral to epilepsy service  
12 Paediatric epilepsy care plan  
13 At risk of sudden unexpected death in epilepsy  
14 Epilepsia partialis continua  
15 Focal status epilepticus  
16 Neurological Disorders Depression Inventory in Epilepsy  
17 SUDEP - sudden unexpected death in epilepsy  
18 Epileptic absence status  
19 Non-convulsive status epilepticus with impaired consciousness  
20 Convulsive status epilepticus  
21 Generalized epilepsy  
22 Idiopathic generalised epilepsy  
23 Idiopathic generalized epilepsy  
24 Primary generalised epilepsy  
25 Temporal-central focal epilepsy  
26 Centrotemporal epilepsy  
27 Childhood absence epilepsy  
28 Symptomatic generalised epilepsy  
29 Symptomatic generalized epilepsy  
30 Secondary generalized epilepsy  
31 Post-traumatic epilepsy  
32 PTE - Post-traumatic epilepsy  
33 Unclassified epileptic seizures  
34 Reflex epilepsy  
35 Sensory-induced epilepsy  
36 Epileptic disorder  
37 Epileptic  
38 EP - Epilepsy  
39 Photogenic epilepsy  
40 History of epilepsy  
41 Epileptic drop attack  
42 Benign myoclonic epilepsy in infancy  
43 TLE - Temporal lobe epilepsy  
44 Mesiobasal limbic epilepsy  
45 At risk of epileptic fits  
46 Benign frontal epilepsy of childhood  
47 Benign atypical partial epilepsy in childhood  
48 Epilepsy with recurrent unilateral seizures in children  
49 Benign occipital epilepsy of childhood - early onset variant  
50 Frontal lobe epilepsy  
51 Opercular epilepsy  
52 Parietal lobe epilepsy

1 Occipital lobe epilepsy  
2 Epilepsy with grand mal seizures on awakening  
3 Cryptogenic generalised epilepsy  
4 Myoclonic astatic epilepsy  
5 Myoclonic absence epilepsy  
6 Cryptogenic myoclonic epilepsy  
7 Idiopathic myoclonic epilepsy  
8 Symptomatic myoclonic epilepsy  
9 Epilepsy undetermined whether focal or generalised  
10 Epilepsy with continuous spike wave during slow-wave sleep  
11 Secondary reading epilepsy  
12 Sleep-related epilepsy  
13 Eating epilepsy  
14 Non-convulsive status epilepticus without three per second spike wave  
15 Non-convulsive simple partial status epilepticus  
16 Epileptic psychosis  
17 Triple X syndrome, epilepsy, and hypogammaglobulinaemia  
18 Epilepsy monitoring status  
19 Generalised epileptiform discharges  
20 Generalized epileptiform discharges  
21 Bilateral periodic epileptiform discharges  
22 Localisation-related idiopathic epilepsy  
23 Epileptic fit  
24 Carbamazepine antiepileptic  
25 Epilepsy monitoring call  
26 Refractory epilepsia partialis continua  
27 Non-epileptic myoclonus  
28 Epilepsy assessment  
29 Nonconvulsive status epilepticus  
30 Refractory epilepsy  
31 Intractable epilepsy  
32 Refractory juvenile myoclonic epilepsy  
33 X-linked epilepsy with learning disability and behaviour disorder syndrome  
34 Epileptic encephalopathy  
35 Epilepsy due to stroke  
36 Epilepsy with mesial temporal sclerosis  
37 Epilepsy co-occurrent and due to dementia  
38 Epilepsy telangiectasia syndrome  
39 Epilepsy of infancy with migrating focal seizures  
40 Epileptic dementia with behavioural disturbance  
41 Intractable partial temporal lobe epilepsy with impairment of consciousness  
42 DNA (did not attend) epilepsy clinic  
43 Epilepsy in pregnancy  
44 Atypical absence epilepsy  
45 Epilepsy care education  
46 Epilepsy monitoring telephone invitation  
47 Infantile spasms with status epilepticus  
48 Petit-mal epilepsy  
49 Epilepsy screening invitation  
50 Referral for epilepsy review  
51  
52  
53  
54  
55  
56  
57  
58  
59  
60



1 Under care of epilepsy specialist nurse  
2 Epilepsy annual review  
3 Epilepsy care management  
4 Epilepsy self-management plan review  
5 Paediatric epilepsy service  
6 Referral to epilepsy specialist nurse declined  
7 Infantile-onset symptomatic epilepsy syndrome  
8 STXBP1 encephalopathy with epilepsy  
9 Benign familial mesial temporal lobe epilepsy  
10 Benign occipital lobe epilepsy  
11 Benign partial epilepsy of infancy with complex partial seizures  
12 Mesial temporal lobe epilepsy with hippocampal sclerosis  
13 New-onset refractory status epilepticus  
14 Cortical dysplasia with focal epilepsy syndrome  
15 Infantile epileptic dyskinetic encephalopathy  
16 Early-onset spastic ataxia, myoclonic epilepsy, neuropathy syndrome  
17 KCNQ2-related epileptic encephalopathy  
18 Myoclonic epilepsy in non-progressive encephalopathy  
19 Cryptogenic late-onset epileptic spasms  
20 Congenital muscular dystrophy with intellectual disability and severe epilepsy  
21 Familial temporal lobe epilepsy  
22 Familial mesial temporal lobe epilepsy with febrile seizures  
23 Benign childhood epilepsy with centrotemporal spikes, refractory  
24 Benign childhood epilepsy with centrotemporal spikes, non-refractory  
25 Epilepsy due to infectious encephalitis  
26 Scar epilepsy  
27 Cerebellar stroke syndrome  
28 Admission to stroke unit  
29 H/O: Stroke in last year  
30 Occlusive stroke  
31 [V]Personal history of stroke  
32 Referral to stroke clinic  
33 H/O: stroke  
34 Haemorrhagic stroke monitoring  
35 Left hemispheric cerebellar artery embolism with stroke  
36 PASS (Postural Assessment Scale for Stroke Patients) score  
37 Exception reporting - stroke quality indicators  
38 Excepted from stroke quality indicators - patient unsuitable  
39 Excepted from stroke quality indicators - informed dissent  
40 Sequelae of stroke, not specfd as h'morrhage or infarction  
41 Did not attend stroke clinic  
42 Seen in stroke clinic  
43 Delivery of rehabilitation for stroke  
44 [X]Sequelae of stroke, not specfd as h'morrhage or infarction  
45 Brainstem stroke syndrome  
46 [RFC] Stroke/CVA  
47 [RFC] Stroke  
48 [RFC] Stroke  
49 MELAS - Mitochondrial encephalopathy, lactic acidosis and stroke-like episodes  
50 Referral to multidisciplinary stroke function improvement service

1 Annual Stroke/CVA blood test  
2 Suspected stroke  
3 Suspected stroke  
4 Referral for multidisciplinary stroke function improvement declined  
5 Referral by stroke nurse specialist  
6 VTE risk assessment - acute stroke  
7 Referral to stroke rehabilitation service  
8 Referral to community stroke service  
9 Discharge from community stroke service  
10 Completed stroke  
11 Juvenile myopathy, encephalopathy, lactic acidosis AND stroke  
12 Brain stem stroke  
13 Nonparalytic stroke  
14 Total anterior cerebral circulation stroke  
15 TACS - Total anterior cerebral circulation stroke  
16 Partial anterior cerebral circulation stroke  
17 PACS - Partial anterior cerebral circulation stroke  
18 Posterior cerebral circulation stroke  
19 Anterior circulation stroke of uncertain pathology  
20 Posterior circulation stroke of uncertain pathology  
21 Spinal cord stroke  
22 Referral to stroke service  
23 Discharge from stroke service  
24 Seen by stroke service  
25 Thrombotic stroke  
26 Embolic stroke  
27 Neonatal stroke  
28 Basal ganglion stroke  
29 Cardioembolic stroke  
30 Ischaemic stroke  
31 Ischemic stroke  
32 Thalamic stroke  
33 Post stroke pain  
34 Cerebral ischaemic stroke due to small artery occlusion  
35 Epilepsy due to stroke  
36 Sequela of cardioembolic stroke  
37 DNA (did not attend) stroke clinic  
38 Ischaemic stroke without coma  
39 Did not attend stroke review  
40 Management of stroke rehabilitation  
41 Acute stroke care  
42 Haemorrhagic stroke  
43 Emergency hospital admission to stroke service  
44 Cerebellar stroke  
45 History of ischaemic stroke  
46 Cerebral ischaemic stroke due to dissection of artery  
47 Cerebral ischaemic stroke due to global hypoperfusion with watershed infarct  
48 Cerebral ischaemic stroke due to hypercoagulable state  
49 Cerebral ischaemic stroke co-occurrent with subarachnoid haemorrhage  
50 Cryptogenic stroke

1 Acute stroke due to occlusion of left posterior cerebral artery  
2 Acute stroke of brainstem  
3 Acute ischaemic stroke  
4 Stroke monitoring  
5 Stroke in the puerperium  
6 Central post-stroke pain  
7 Stroke due to basilar artery thrombus  
8 Stroke due to thrombus of right middle cerebral artery  
9 Stroke due to thrombus of left middle cerebral artery  
10 Stroke care plan  
11 Stroke due to cerebral arterial occlusion  
12 Stroke unspecified  
13 Stroke/CVA - undefined  
14 Stroke  
15 Stroke monitoring administration  
16 Stroke monitoring invite 1  
17 Stroke monitoring invite 2  
18 Stroke monitoring invite 3  
19 Stroke 6 month review  
20 Mitoch myopath/encephalopath/lactic acidosis/stroke-like episode  
21 Central post-stroke pain  
22 Stroke self-management plan review  
23 Stroke self-management plan agreed  
24 Stroke annual review  
25 Stroke initial post discharge review  
26 Stroke rehabilitation  
27 Stroke  
28 Stroke of uncertain pathology  
29 Stroke test positive  
30 Stroke test negative  
31 Stroke clinic  
32 Stroke impact scale version 3.0  
33 Stroke impact scale version 3.0 score  
34 Stroke/cerebrovascular accident 6 month review  
35 Stroke medicine  
36 Cerebral infarct due to thrombosis of precerebral arteries  
37 Cerebral infarction due to embolism of precerebral arteries  
38 Cerebral infarction due to thrombosis of cerebral arteries  
39 Cerebral infarction due to embolism of cerebral arteries  
40 Sequelae of cerebral infarction  
41 [X]Other cerebral infarction  
42 Cerebral infarction  
43 Left sided cerebral infarction  
44 Right sided cerebral infarction  
45 Occlusion and stenosis of cerebral arteries, not resulting in cerebral infarction  
46 [X]Cerebrl infarctn due/unspcf occlusn or sten/cerebrl artr  
47 Cerebral infarction due to cerebral venous thrombosis, non-pyogenic  
48 Cerebral infarction due to occlusion of precerebral artery  
49 Cerebrl infarctn due/unspcf occlusn or sten/cerebrl artr  
50 Cerebral autosomal dominant arteriopathy with subcortical infarcts and leukoencephalopathy

1 Cerebral infarction with haemorrhagic transformation  
2 Cause of Death- Cerebral Infarct  
3 Surveillance of Cerebral Palsy in Europe classification - predominant pattern B.2 - sequelae of intraventricular I  
4 Surveillance of Cerebral Palsy in Europe classification - predominant pattern C.3 - infarct of the middle cerebra  
5 Old cerebral infarction on imaging  
6 Cerebral infarction due to occlusion of cerebral artery  
7 Cerebral infarction due to stenosis of cerebral artery  
8 Anterior cerebral circulation infarction  
9 Total anterior cerebral circulation infarction  
10 TACI - Total anterior cerebral circulation infarction  
11 Partial anterior cerebral circulation infarction  
12 PACI - Partial anterior cerebral circulation infarction  
13 Posterior cerebral circulation infarction  
14 Haemorrhagic cerebral infarction  
15 Anterior cerebral circulation haemorrhagic infarction  
16 Posterior cerebral circulation haemorrhagic infarction  
17 Occipital cerebral infarction  
18 Cerebral infarction due to embolism of middle cerebral artery  
19 Cerebral infarction due to thrombosis of middle cerebral artery  
20 Silent cerebral infarct  
21 Sequela of ischaemic cerebral infarction  
22 Cerebral degeneration in mucopolysaccharidoses  
23 Cerebrovascular accident  
24 [V]Personal history of cerebrovascular accident (CVA)  
25 Cerebrovascular accident due to thrombus of left carotid artery  
26 Cerebrovascular accident due to thrombus of basilar artery  
27 Cerebrovascular accident due to thrombus of right carotid artery  
28 Cerebrovascular accident due to thrombus of right middle cerebral artery  
29 Cerebrovascular accident due to thrombus of left middle cerebral artery  
30 Cerebrovascular accident due to occlusion of left pontine artery  
31 Cerebrovascular accident due to occlusion of right posterior cerebral artery  
32 Cerebrovascular accident due to occlusion of left middle cerebral artery  
33 Cerebrovascular accident due to occlusion of left posterior cerebral artery  
34 Cerebrovascular accident due to occlusion of right middle cerebral artery  
35 Cerebrovascular accident due to occlusion of right middle cerebral artery by embolus  
36 CVA - cerebrovascular accident due to cerebral artery occlusion  
37 CVA - cerebrovascular accident in the puerperium  
38 CVA - Cerebrovascular accident  
39 History of cerebrovascular accident  
40 Suspected cerebrovascular accident  
41 Cerebrovascular accident care plan  
42 Left sided cerebral hemisphere cerebrovascular accident  
43 Right sided cerebral hemisphere cerebrovascular accident  
44 Extension of cerebrovascular accident  
45 Cerebrovascular accident annual review  
46 Cerebrovascular accident due to stenosis of bilateral carotid arteries  
47 History of embolic cerebrovascular accident  
48 History of cerebrovascular accident due to ischaemia  
49 Cerebrovascular accident due to occlusion of bilateral pontine arteries  
50 Acute cerebrovascular accident due to stenosis of left carotid artery

1 Acute cerebrovascular accident due to occlusion of left middle cerebral artery  
2 Acute cerebrovascular accident due to occlusion of right posterior cerebral artery  
3 Acute cerebrovascular accident due to occlusion of right middle cerebral artery  
4 Acute cerebrovascular accident due to occlusion of right carotid artery  
5 Acute cerebrovascular accident due to occlusion of left carotid artery  
6 Acute cerebrovascular accident of basal ganglia  
7 Acute cerebrovascular accident of brainstem  
8 Acute cerebrovascular accident due to stenosis of right carotid artery  
9 Acute cerebrovascular accident due to occlusion of right cerebellar artery  
10 Acute cerebrovascular accident due to ischaemia  
11 Acute cerebrovascular accident due to occlusion of left cerebellar artery  
12 Acute cerebrovascular accident due to embolism of right middle cerebral artery  
13 Acute cerebrovascular accident due to embolism of left middle cerebral artery  
14 Left sided CVA  
15 Right sided CVA  
16 H/O: CVA  
17 CVA annual review  
18 CVA unspecified  
19 [RFC] CVA  
20 Presenile dementia  
21 Senile dementia  
22 H/O: dementia  
23 Uncomplicated senile dementia  
24 Uncomplicated presenile dementia  
25 Presenile dementia with delirium  
26 Presenile dementia with paranoia  
27 Presenile dementia with depression  
28 Presenile dementia NOS  
29 Senile dementia with depressive or paranoid features  
30 Senile dementia with paranoia  
31 Senile dementia with depression  
32 Senile dementia with depressive or paranoid features NOS  
33 Senile dementia with delirium  
34 Uncomplicated arteriosclerotic dementia  
35 Arteriosclerotic dementia with delirium  
36 Arteriosclerotic dementia with paranoia  
37 Arteriosclerotic dementia with depression  
38 Arteriosclerotic dementia NOS  
39 Drug-induced dementia  
40 Dementia in conditions EC  
41 [X]Dementia in Alzheimer's disease  
42 [X]Dementia in Alzheimer's dis, atypical or mixed type  
43 [X]Dementia in Alzheimer's disease, unspecified  
44 [X]Other vascular dementia  
45 [X]Vascular dementia, unspecified  
46 Dementia associated with another disease  
47 Dementia due to Pick's disease  
48 Dementia due to Creutzfeldt Jakob disease  
49 Dementia due to Huntington chorea  
50 Dementia in Parkinsons disease

1  
2 [X]Dementia in other specified diseases classif elsewhere  
3 [X]Delirium not superimposed on dementia, so described  
4 [X]Delirium superimposed on dementia  
5 Alcoholic dementia  
6 Other alcoholic dementia  
7 Arteriosclerotic dementia  
8 Subcortical dementia  
9 Dementia due to and following injury of head  
10 Senile/presenile dementia  
11 Exception reporting - dementia quality indicators  
12 Excepted from dementia quality indicators - informed dissent  
13 [X] Presenile dementia NOS  
14 Cerebral degeneration presenting primarily with dementia  
15 [X] Senile dementia NOS  
16 [X] Senile dementia, depressed or paranoid type  
17 Dementia  
18 [X]Alcoholic dementia NOS  
19 [X]Alzheimer's dementia unspec  
20 [X]Arteriosclerotic dementia  
21 Dementia in Alzheimer's disease with early onset  
22 Dementia in Alzheimer's disease with late onset  
23 [X]Dementia in human immunodef virus [HIV] disease  
24 [X]Dementia infantalis  
25 Mixed cortical and subcortical vascular dementia  
26 [X]Multi-infarct dementia  
27 Dementia monitoring administration  
28 Dementia monitoring  
29 Dementia monitoring first letter  
30 Dementia annual review  
31 Dementia monitoring second letter  
32 Dementia monitoring third letter  
33 Dementia monitoring verbal invitation  
34 Dementia monitoring telephone invitation  
35 [X]Predominantly cortical dementia  
36 [X]Presenile dementia,Alzheimer's type  
37 [X]Primary degen dementia of Alzheimer's type, senile onset  
38 [X]Primary degen dementia, Alzheimer's type, presenile onset  
39 [X]Senile dementia,Alzheimer's type  
40 Subcortical vascular dementia  
41 Vascular dementia  
42 Vascular dementia of acute onset  
43 Multi-infarct dementia  
44 Dementia  
45 Other senile/presenile dement.  
46 Senile and presenile dementias  
47 Senile dementia - simple type  
48 Senile dementia-acute confused  
49 [D] Vascular dementia  
50 [D] Dementia with Lewy bodies  
51 [D] Dementia

1 [D] Dementia in Alzheimer's disease  
2 Dementia review  
3 Dementia review with third party  
4 [RFC] Dementia  
5 Excepted from dementia quality indicators - patient unsuitable  
6 Dementia confirmed  
7 Dementia care plan  
8 Dementia monitoring in primary care  
9 Dementia monitoring in secondary care  
10 Did not attend dementia monitoring  
11 Dementia medication review  
12 3D study - problems with dementia management  
13 Referral to dementia early intervention service  
14 Dementia post diagnostic support (Scotland)  
15 Dementia stage at diagnosis  
16 Dementia stage at diagnosis - early (mild)  
17 Dementia stage at diagnosis - mid (moderate)  
18 Dementia stage at diagnosis - late (severe)  
19 Dementia stage at diagnosis - undetermined  
20 Dementia stage at diagnosis - not known  
21 Person centred dementia support plan (Scotland)  
22 Dementia support plan (Scot) in place at 12 months  
23 Dementia support plan (Scot) partly in place at 12 months  
24 Dementia support plan (Scot) absent at 12 months  
25 Dementia post diagnostic support (PDS) - transition arrangements  
26 Dementia PDS transition - referred for community care support  
27 Dementia post diagnostic support (PDS)(Scot)- 5 pillar model  
28 Dementia PDS (Scot) - planning for future care status  
29 Dementia PDS (Scot) - peer support status  
30 Dementia PDS (Scot) - supporting community connections status  
31 Dementia PDS (Scot) support community connections - pillar met  
32 Dementia PDS planning future decision-making -pillar partially met  
33 Dementia link worker details  
34 Dementia case finding question: positive response from patient  
35 Dementia in Alzheimer's disease with early onset, without additional symptoms  
36 Dementia in Alzheimer's disease with early onset, other symptoms, predominantly delusional  
37 Mental & behav dis due to sed/hypntcs: resid & late-onset psychot dis, dementia  
38 Mental & behav dis due to use opioids: resid & late-onset psychot dis, dementia  
39 Dementia in Alzheimer's disease with early onset, other symptoms, predominantly hallucinatory  
40 Unspecified dementia, without additional symptoms  
41 Unspecified dementia, other symptoms, predominantly delusional  
42 Unspecified dementia, other symptoms, predominantly hallucinatory  
43 Unspecified dementia, other symptoms, predominantly depressive  
44 Unspecified dementia, other mixed symptoms  
45 Dementia in Alzheimer's disease with early onset, other symptoms, predominantly depressive  
46 Dementia in Alzheimer's disease with early onset, other mixed symptoms  
47 Dementia in Alzheimer's disease with late onset, without additional symptoms  
48 Dementia in Alzheimer's disease with late onset, other symptoms, predominantly delusional  
49 Dementia in Alzheimer's disease with late onset, other symptoms, predominantly hallucinatory  
50 Dementia in Alzheimer's disease with late onset, other symptoms, predominantly depressive



1 Dementia in Alzheimer's disease with late onset, other mixed symptoms  
2 Dementia in Alzheimer's dis, atypical or mixed type, without additional symptoms  
3 Dementia in Alzheimer's dis, atypical or mixed type, other symptoms, predominantly delusional  
4 Dementia in Alzheimer's dis, atypical or mixed type, other symptoms, predominantly hallucinatory  
5 Dementia in Alzheimer's dis, atypical or mixed type, other symptoms, predominantly depressive  
6 Dementia in Alzheimer's dis, atypical or mixed type, other mixed symptoms  
7 Dementia in Alzheimer's disease, unspecified, without additional symptoms  
8 Dementia in Alzheimer's disease, unspecified, other symptoms, predominantly delusional  
9 Mental & behav dis due to cannabinoids: resid & late-onset psychot dis, dementia  
10 Dementia in Alzheimer's disease, unspecified, other symptoms, predominantly depressive  
11 Dementia in Alzheimer's disease, unspecified, other mixed symptoms  
12 Vascular dementia of acute onset, without additional symptoms  
13 Vascular dementia of acute onset, other symptoms, predominantly delusional  
14 Vascular dementia of acute onset, other mixed symptoms  
15 Multi-infarct dementia, other symptoms, predominantly depressive  
16 Multi-infarct dementia, other mixed symptoms  
17 Subcortical vascular dementia, without additional symptoms  
18 Subcortical vascular dementia, other symptoms, predominantly delusional  
19 Subcortical vascular dementia, other symptoms, predominantly hallucinatory  
20 Subcortical vascular dementia, other mixed symptoms  
21 Mixed cortical and subcortical vascular dementia, without additional symptoms  
22 Mixed cortical and subcortical vascular dementia, other symptoms, predominantly delusional  
23 Mixed cortical and subcortical vascular dementia, other symptoms, predominantly hallucinatory  
24 Mixed cortical and subcortical vascular dementia, other symptoms, predominantly depressive  
25 Mixed cortical and subcortical vascular dementia, other mixed symptoms  
26 Mental and behav dis due to vol solvents: resid & late-onset psychotic dis, dementia  
27 Other vascular dementia, without additional symptoms  
28 Other vascular dementia, other symptoms, predominantly delusional  
29 Other vascular dementia, other symptoms, predominantly hallucinatory  
30 Other vascular dementia, other symptoms, predominantly depressive  
31 Other vascular dementia, other mixed symptoms  
32 Vascular dementia, unspecified, without additional symptoms  
33 Vascular dementia, unspecified, other symptoms, predominantly hallucinatory  
34 Mental and behav dis due to hallucinogens: resid & late-onset psychot dis, dementia  
35 Mental & behav dis due to use cocaine: resid & late-onset psychot dis, dementia  
36 Mental and behav dis mlti drg use/oth psych subs: resid/late psychot dis, dementia  
37 Mental & behav dis due to tobacco: resid & late-onset psychot dis, dementia  
38 Mental & behav dis due to use alcohol: resid & late-onset psychot dis, dementia  
39 Mental and behav dis due to other stimulants inc caffeine: resid/late-onset psycht dis, dementia  
40 Vascular dementia, unspecified, other mixed symptoms  
41 Suspected dementia  
42 Referral to dementia service  
43 Dementia care plan  
44 Assessment of psychotic and behavioural symptoms of dementia  
45 Antipsychotic drug therapy for dementia  
46 Dementia advance care plan declined  
47 Dementia advance care plan agreed  
48 Review of dementia advance care plan  
49 Dementia medication review  
50 Dementia care plan agreed



1 Dementia care plan reviewed  
2 Dementia care plan declined  
3 Dementia care plan review declined  
4 Dementia advance care plan  
5 Dementia advance care plan review declined  
6 Dementia assessment care plan  
7 Dementia associated with alcoholism  
8 Primary degenerative dementia of the Alzheimer type, senile onset, with delirium  
9 Primary degenerative dementia of the Alzheimer type, presenile onset, uncomplicated  
10 Shared care prescribing of drug for dementia  
11 Shared care prescribing of drugs for dementia declined  
12 Dialysis dementia  
13 Vascular dementia, with delirium  
14 Predominantly cortical vascular dementia  
15 Offer of dementia advance care planning review declined  
16 Review of dementia advance care plan  
17 Dementia advance care plan agreed  
18 Multi-infarct dementia with delusions  
19 Primary degenerative dementia of the Alzheimer type, senile onset, with depression  
20 Alzheimer dementia  
21 MID - Multi-infarct dementia  
22 VAD - Vascular dementia  
23 Parkinson-dementia complex of Guam  
24 Primary degenerative dementia of the Alzheimer type, senile onset, uncomplicated  
25 Multi-infarct dementia, uncomplicated  
26 Dementia of the Lewy body type  
27 Subcortical atherosclerotic dementia  
28 History of dementia  
29 Amyotrophic lateral sclerosis with dementia  
30 Frontotemporal dementia  
31 Semantic dementia  
32 Patchy dementia  
33 Dementia of frontal lobe type  
34 DFT - Dementia frontal lobe type  
35 Senile dementia of the Lewy body type  
36 Lewy body dementia  
37 Senile dementia with delusion  
38 Senile dementia with psychosis  
39 Dementia management  
40 Primary degenerative dementia of the Alzheimer type, presenile onset  
41 Dementia of the Alzheimers type with early onset  
42 Presenile dementia, Alzheimer's type  
43 Dementia in Alzheimer's disease - type 2  
44 Primary degenerative dementia of the Alzheimer type, senile onset  
45 Dementia of the Alzheimers type, late onset  
46 SDAT - Senile dementia, Alzheimer's type  
47 Dementia in Alzheimer's disease - type 1  
48 Dementia associated with AIDS  
49 Acquired immune deficiency syndrome dementia complex  
50 Dementia associated with Parkinson's Disease

1 Dementia associated with Parkinson Disease  
2 Dementia due to Huntingtons disease  
3 Dementia associated with normal pressure hydrocephalus  
4 Dementia associated with multiple sclerosis  
5 Post-traumatic dementia with behavioural change  
6 Frontotemporal dementia with parkinsonism-17  
7 Dementia co-occurrent with human immunodeficiency virus infection  
8 Behavioural variant of frontotemporal dementia  
9 Ischaemic vascular dementia  
10 Rapidly progressive dementia  
11 Epilepsy co-occurrent and due to dementia  
12 Delirium superimposed on dementia  
13 Dementia due to chronic subdural haematoma  
14 Dementia with Down syndrome  
15 Dementia of the Alzheimer type with behavioural disturbance  
16 Dementia with behavioural disturbance  
17 Dementia due to Picks disease  
18 Dementia due to Pick disease  
19 Primary degenerative dementia  
20 Early onset dementia with delusions  
21 Mixed dementia  
22 Altered behaviour in Huntington's dementia  
23 Epileptic dementia with behavioural disturbance  
24 Anti-dementia drug therapy  
25 Dementia due to Parkinson's disease  
26 Dementia due to Parkinsons disease  
27 Dementia due to Parkinson disease  
28 Lewy body dementia with behavioural disturbance  
29 Lewy body dementia with behavioral disturbance  
30 Vascular dementia with behavioural disturbance  
31 Vascular dementia with behavioral disturbance  
32 Dementia monitoring invitation  
33 Dementia care plan  
34 Behavioural and psychological symptoms of dementia  
35 BPSD - behavioral and psychological symptoms of dementia  
36 BPSD - behavioural and psychological symptoms of dementia  
37 Behavioral and psychological symptoms of dementia  
38 Dementia advance care planning declined  
39 Dementia with mixed etiology  
40 MVAD - Mixed vascular Alzheimer dementia  
41 Dementia with mixed aetiology  
42 QOF (Quality and Outcomes Framework) dementia quality indicator-related care invitation  
43 QOF (Quality and Outcomes Framework) dementia quality indicator-related care invitation using preferred me  
44 Cortical vascular dementia  
45 Senile degeneration of brain  
46 Senile or presenile psychoses NOS  
47 [D]Senility, without psychosis NOS  
48 Senile and presenile organic psychotic conditions  
49 Other senile and presenile organic psychoses  
50 Senility

1 O/E - senile - old age  
2 O/E - senility - no psychosis  
3 [D]Senility  
4 [D] Senile confusion  
5 [X] Presenile psychosis NOS  
6 [X] Senile psychosis NOS  
7 Senile brain degeneration  
8 Alzheimer's disease  
9 [X]Other Alzheimer's disease  
10 Alzheimer's disease with early onset  
11 Alzheimer's disease with late onset  
12 [X]Alzheimer's disease type 1  
13 [X]Alzheimer's disease type 2  
14 [RFC] Alzheimer's disease  
15 Cause of Death- Alzheimer'S Disease  
16 Adverse reaction to Alzest  
17 AD - Alzheimer's disease  
18 Alzheimer disease  
19 Lewy body variant of Alzheimer's disease  
20 Familial Alzheimer's disease of early onset  
21 Non-familial Alzheimer's disease of early onset  
22 Familial Alzheimer's disease of late onset  
23 Non-familial Alzheimer's disease of late onset  
24 Focal Alzheimer's disease  
25 Non-Alzheimer's progressive dysphasia  
26 Progressive aphasia in Alzheimer's disease  
27 Non-amnestic Alzheimer disease  
28 Altered behaviour in Alzheimer's disease  
29 Early onset Alzheimer's disease with behavioural disturbance  
30 Early onset Alzheimers disease with behavioral disturbance  
31 Delusions in Alzheimer's disease  
32 Depressed mood in Alzheimer's disease  
33 Alzheimer's disease co-occurrent with delirium  
34 Foster-Kennedy syndrome  
35 Motor neurone disease NOS  
36 Kennedy syndrome  
37 Motor neurone disease  
38 [RFC] Motor neurone disease  
39 [RFC] Motor neurone disease  
40 Motor neuron disease  
41 MND - Motor neurone disease  
42 Lower motor neuron disease  
43 Polymyositis  
44 Interstitial myositis  
45 Orbital myositis  
46 Poikilodermatomyositis  
47 Lung disease with polymyositis  
48 Myositis in sarcoidosis  
49 Myalgia and myositis unspecified  
50 Fibromyositis

1 [X]Other dermatomyositis  
2 [X]Dermatopolymyositis, unspecified  
3 Dermatopolymyositis in neoplastic disease  
4 Dermatomyositis  
5 Juvenile dermatomyositis  
6 [X]Dermato(poly)myositis in neoplastic disease CE  
7 Dermatopolymyositis, unspecified  
8 Inclusion body myositis  
9 Dermatomyositis sine myositis  
10 Amyopathic dermatomyositis  
11 Polymyositis with malignant disease  
12 Dermatomyositis with malignant disease  
13 Autoimmune myositis  
14 Idiopathic inflammatory myositis  
15 Orbital myositis of both eyes  
16 Postencephalitic parkinsonism  
17 Syphilitic parkinsonism  
18 Parkinson's disease  
19 Dementia in Parkinsons disease  
20 Parkinson's disease NOS  
21 Orthostatic hypotension co-occurrent and due to Parkinson's disease  
22 [X]Other drug-induced secondary parkinsonism  
23 [X]Other secondary parkinsonism  
24 [X]Parkinsonism in diseases classified elsewhere  
25 [X]Secondary parkinsonism, unspecified  
26 [X]Secondary parkinsonism due to other external agents  
27 Vascular parkinsonism  
28 Multiple system atrophy, Parkinson variant  
29 Secondary parkinsonism due to other external agents  
30 Secondary parkinsonism  
31 Parkinsonism secondary to drugs  
32 Parkinsonism due to drug  
33 Cerebral degeneration in Parkinson's disease  
34 Secondary Parkinsonism - drugs  
35 [RFC] Parkinson's disease  
36 [RFC] Parkinson's disease  
37 History of Parkinson's disease  
38 Reason for referral: Parkinsons Disease  
39 Referral to community Parkinson's disease clinical nurse specialist  
40 Referral to community Parkinson's service  
41 Parkinsonism  
42 Idiopathic Parkinson's disease  
43 Parkinson disease  
44 PD - Parkinson's disease  
45 Parkinsons disease  
46 Parkinson-dementia complex of Guam  
47 Dementia associated with Parkinson's Disease  
48 Dementia associated with Parkinson Disease  
49 Multiple system atrophy, Parkinson's variant  
50 Frontotemporal dementia with parkinsonism-17

1 Early onset Parkinson disease  
2 Early onset Parkinson's disease  
3 Early onset Parkinson's disease  
4 Psychosis co-occurrent and due to Parkinson's disease  
5 Adult-onset dystonia parkinsonism  
6 Early-onset dystonia parkinsonism  
7 Atypical Parkinsonism  
8 Dementia due to Parkinson's disease  
9 Dementia due to Parkinsons disease  
10 Dementia due to Parkinson disease  
11 Parkinsonian pyramidal syndrome  
12 Postpolio syndrome  
13 H/O: poliomyelitis  
14 Notification of acute polio  
15 Acute paralytic non-bulbar poliomyelitis  
16 Acute paralytic poliomyelitis  
17 Acute paralytic poliomyelitis, vaccine-associated  
18 Acute paralytic poliomyelitis, wild virus, imported  
19 Acute paralytic poliomyelitis, wild virus, indigenous  
20 Acute poliomyelitis NOS  
21 [X]Acute paralytic poliomyelitis, other and unspecified  
22 [X]Acute poliomyelitis, unspecified  
23 Poliomyelitis encephalitis  
24 Post polio vaccination encephalitis  
25 Osteopathy from poliomyelitis  
26 Poliomyelitis osteopathy of unspecified site  
27 Poliomyelitis osteopathy of the shoulder region  
28 Poliomyelitis osteopathy of the upper arm  
29 Poliomyelitis osteopathy of the forearm  
30 Poliomyelitis osteopathy of the hand  
31 Poliomyelitis osteopathy of the pelvic region and thigh  
32 Poliomyelitis osteopathy of the lower leg  
33 Poliomyelitis osteopathy of the ankle and foot  
34 Poliomyelitis osteopathy of other specified sites  
35 Poliomyelitis osteopathy of multiple sites  
36 Poliomyelitis osteopathy NOS  
37 Late effects of acute poliomyelitis  
38 Acute paralytic bulbar poliomyelitis  
39 Acute non-paralytic poliomyelitis  
40 Acute poliomyelitis  
41 Poliomyelitis & other non-arthropod-borne viral diseases-CNS  
42 [D]Post polio exhaustion  
43 [X]Sequelae of poliomyelitis  
44 Polioencephalitis  
45 Post poliomyelitis syndrome  
46 Late effects of poliomyelitis  
47 Sequelae of poliomyelitis  
48 Polio  
49 Poliomyelitis  
50 Athetoid cerebral palsy  
51 Cerebral palsy

1  
2 Other congenital cerebral palsy  
3 Ataxic infantile cerebral palsy  
4 Other infantile cerebral palsy NOS  
5 Congenital cerebral palsy NOS  
6 [X]Cerebral palsy and other paralytic syndromes  
7 [X]Other infantile cerebral palsy  
8 Infantile cerebral palsy  
9 Spastic cerebral palsy  
10 Dyskinetic cerebral palsy  
11 Congenital cerebral palsy  
12 Congenital spastic cerebral palsy  
13 Cerebral palsy, not congenital or infantile, acute  
14 Ataxic diplegic cerebral palsy  
15 Neuromuscular scoliosis due to cerebral palsy  
16 Athetoid cerebral palsy  
17 Cerebral palsy with spastic diplegia  
18 Flaccid infantile cerebral palsy  
19 [RFC] Cerebral palsy  
20 [RFC] Cerebral palsy  
21 Spastic diplegic cerebral palsy  
22 Spastic quadriplegic cerebral palsy  
23 Other cerebral palsy  
24 Cerebral palsy NOS  
25 Spastic hemiplegic cerebral palsy  
26 Choreo-athetotic cerebral palsy  
27 Choreoathetoid cerebral palsy  
28 Bilateral spastic cerebral palsy  
29 Hemiplegic cerebral palsy  
30 Quadriplegic cerebral palsy  
31 Diplegic cerebral palsy  
32 Spastic diplegic cerebral palsy  
33 Hypotonic cerebral palsy  
34 Dystonic/rigid cerebral palsy  
35 Ataxic cerebral palsy  
36 Dystonic cerebral palsy  
37 Bilateral cerebral palsy  
38 Bilateral spastic cerebral palsy  
39 [X]Cerebral palsy and other paralytic syndromes  
40  
41  
42  
43  
44  
45  
46  
47  
48  
49  
50  
51  
52  
53  
54  
55  
56  
57  
58  
59  
60

1  
2  
3  
4  
5  
6  
7  
8  
9  
10  
11  
12  
13  
14  
15  
16  
17  
18  
19  
20  
21  
22  
23  
24  
25  
26  
27  
28  
29  
30  
31  
32  
33  
34  
35  
36  
37  
38  
39  
40  
41  
42  
43  
44  
45  
46  
47  
48  
49  
50  
51  
52  
53  
54  
55  
56  
57  
58  
59  
60

For peer review only

1  
2  
3  
4  
5  
6  
7  
8  
9  
10  
11  
12  
13  
14  
15  
16  
17  
18  
19  
20  
21  
22  
23  
24  
25  
26  
27  
28  
29  
30  
31  
32  
33  
34  
35  
36  
37  
38  
39  
40  
41  
42  
43  
44  
45  
46  
47  
48  
49  
50  
51  
52  
53  
54  
55  
56  
57  
58  
59  
60

For peer review only



1  
2  
3  
4  
5  
6  
7  
8  
9  
10  
11  
12  
13  
14  
15  
16  
17  
18  
19  
20  
21  
22  
23  
24  
25  
26  
27  
28  
29  
30  
31  
32  
33  
34  
35  
36  
37  
38  
39  
40  
41  
42  
43  
44  
45  
46  
47  
48  
49  
50  
51  
52  
53  
54  
55  
56  
57  
58  
59  
60

For peer review only

1  
2  
3  
4  
5  
6  
7  
8  
9  
10  
11  
12  
13  
14  
15  
16  
17  
18  
19  
20  
21  
22  
23  
24  
25  
26  
27  
28  
29  
30  
31  
32  
33  
34  
35  
36  
37  
38  
39  
40  
41  
42  
43  
44  
45  
46  
47  
48  
49  
50  
51  
52  
53  
54  
55  
56  
57  
58  
59  
60

For peer review only

1  
2  
3  
4  
5  
6  
7  
8  
9  
10  
11  
12  
13  
14  
15  
16  
17  
18  
19  
20  
21  
22  
23  
24  
25  
26  
27  
28  
29  
30  
31  
32  
33  
34  
35  
36  
37  
38  
39  
40  
41  
42  
43  
44  
45  
46  
47  
48  
49  
50  
51  
52  
53  
54  
55  
56  
57  
58  
59  
60

For peer review only

1  
2  
3  
4  
5  
6  
7  
8  
9  
10  
11  
12  
13  
14  
15  
16  
17  
18  
19  
20  
21  
22  
23  
24  
25  
26  
27  
28  
29  
30  
31  
32  
33  
34  
35  
36  
37  
38  
39  
40  
41  
42  
43  
44  
45  
46  
47  
48  
49  
50  
51  
52  
53  
54  
55  
56  
57  
58  
59  
60

For peer review only

1  
2  
3  
4  
5  
6  
7  
8  
9  
10  
11  
12  
13  
14  
15  
16  
17  
18  
19  
20  
21  
22  
23  
24  
25  
26  
27  
28  
29  
30  
31  
32  
33  
34  
35  
36  
37  
38  
39  
40  
41  
42  
43  
44  
45  
46  
47  
48  
49  
50  
51  
52  
53  
54  
55  
56  
57  
58  
59  
60

For peer review only

1  
2  
3  
4  
5  
6  
7  
8  
9  
10  
11  
12  
13  
14  
15  
16  
17  
18  
19  
20  
21  
22  
23  
24  
25  
26  
27  
28  
29  
30  
31  
32  
33  
34  
35  
36  
37  
38  
39  
40  
41  
42  
43  
44  
45  
46  
47  
48  
49  
50  
51  
52  
53  
54  
55  
56  
57  
58  
59  
60

For peer review only

1  
2  
3  
4  
5  
6  
7  
8  
9  
10  
11  
12  
13  
14  
15  
16  
17  
18  
19  
20  
21  
22  
23  
24  
25  
26  
27  
28  
29  
30  
31  
32  
33  
34  
35  
36  
37  
38  
39  
40  
41  
42  
43  
44  
45  
46  
47  
48  
49  
50  
51  
52  
53  
54  
55  
56  
57  
58  
59  
60

For peer review only

1  
2  
3  
4  
5  
6  
7  
8  
9  
10  
11  
12  
13  
14  
15  
16  
17  
18  
19  
20  
21  
22  
23  
24  
25  
26  
27  
28  
29  
30  
31  
32  
33  
34  
35  
36  
37  
38  
39  
40  
41  
42  
43  
44  
45  
46  
47  
48  
49  
50  
51  
52  
53  
54  
55  
56  
57  
58  
59  
60

For peer review only



1  
2  
3  
4  
5  
6  
7  
8  
9  
10  
11  
12  
13  
14  
15  
16  
17  
18  
19  
20  
21  
22  
23  
24  
25  
26  
27  
28  
29  
30  
31  
32  
33  
34  
35  
36  
37  
38  
39  
40  
41  
42  
43  
44  
45  
46  
47  
48  
49  
50  
51  
52  
53  
54  
55  
56  
57  
58  
59  
60

For peer review only

1  
2  
3  
4  
5  
6  
7  
8  
9  
10  
11  
12  
13  
14  
15  
16  
17  
18  
19  
20  
21  
22  
23  
24  
25  
26  
27  
28  
29  
30  
31  
32  
33  
34  
35  
36  
37  
38  
39  
40  
41  
42  
43  
44  
45  
46  
47  
48  
49  
50  
51  
52  
53  
54  
55  
56  
57  
58  
59  
60

tion

For peer review only

1  
2  
3  
4  
5  
6  
7  
8  
9  
10  
11  
12  
13  
14  
15  
16  
17  
18  
19  
20  
21  
22  
23  
24  
25  
26  
27  
28  
29  
30  
31  
32  
33  
34  
35  
36  
37  
38  
39  
40  
41  
42  
43  
44  
45  
46  
47  
48  
49  
50  
51  
52  
53  
54  
55  
56  
57  
58  
59  
60

For peer review only

1  
2  
3  
4  
5  
6  
7  
8  
9  
10  
11  
12  
13  
14  
15  
16  
17  
18  
19  
20  
21  
22  
23  
24  
25  
26  
27  
28  
29  
30  
31  
32  
33  
34  
35  
36  
37  
38  
39  
40  
41  
42  
43  
44  
45  
46  
47  
48  
49  
50  
51  
52  
53  
54  
55  
56  
57  
58  
59  
60

For peer review only

1  
2  
3  
4  
5  
6  
7  
8  
9  
10  
11  
12  
13  
14  
15  
16  
17  
18  
19  
20  
21  
22  
23  
24  
25  
26  
27  
28  
29  
30  
31  
32  
33  
34  
35  
36  
37  
38  
39  
40  
41  
42  
43  
44  
45  
46  
47  
48  
49  
50  
51  
52  
53  
54  
55  
56  
57  
58  
59  
60

For peer review only

1  
2  
3  
4  
5  
6  
7  
8  
9  
10  
11  
12  
13  
14  
15  
16  
17  
18  
19  
20  
21  
22  
23  
24  
25  
26  
27  
28  
29  
30  
31  
32  
33  
34  
35  
36  
37  
38  
39  
40  
41  
42  
43  
44  
45  
46  
47  
48  
49  
50  
51  
52  
53  
54  
55  
56  
57  
58  
59  
60

For peer review only

1  
2  
3  
4  
5  
6  
7  
8  
9  
10  
11  
12  
13  
14  
15  
16  
17  
18  
19  
20  
21  
22  
23  
24  
25  
26  
27  
28  
29  
30  
31  
32  
33  
34  
35  
36  
37  
38  
39  
40  
41  
42  
43  
44  
45  
46  
47  
48  
49  
50  
51  
52  
53  
54  
55  
56  
57  
58  
59  
60

For peer review only

1  
2  
3  
4  
5  
6  
7  
8  
9  
10  
11  
12  
13  
14  
15  
16  
17  
18  
19  
20  
21  
22  
23  
24  
25  
26  
27  
28  
29  
30  
31  
32  
33  
34  
35  
36  
37  
38  
39  
40  
41  
42  
43  
44  
45  
46  
47  
48  
49  
50  
51  
52  
53  
54  
55  
56  
57  
58  
59  
60

For peer review only



| ICD-10 code | Term                                                                                             |
|-------------|--------------------------------------------------------------------------------------------------|
| F72.0       | Severe mental retardation with the statement of no, or minimal, impairment of behaviour          |
| F72.1       | Severe mental retardation significant impairment of behaviour requiring attention or treatment   |
| F72.8       | Severe mental retardation other impairments of behaviour                                         |
| F72.9       | Severe mental retardation without mention of impairment of behaviour                             |
| F73.0       | Profound mental retardation with the statement of no, or minimal, impairment of behaviour        |
| F73.1       | Profound mental retardation significant impairment of behaviour requiring attention or treatment |
| F73.8       | Profound mental retardation other impairments of behaviour                                       |
| F73.9       | Profound mental retardation without mention of impairment of behaviour                           |
| F78.1       | Other mental retardation significant impairment of behaviour requiring attention or treatment    |
| F80.3       | Acquired aphasia with epilepsy [Landau-Kleffner]                                                 |
| F84.2       | Rett syndrome                                                                                    |
| F84.3       | Other childhood disintegrative disorder                                                          |
| Q90.0       | Trisomy 21, meiotic nondisjunction                                                               |
| Q90.1       | Trisomy 21, mosaicism (mitotic nondisjunction)                                                   |
| Q90.2       | Trisomy 21, translocation                                                                        |
| Q90.9       | Down syndrome, unspecified                                                                       |
| Q91.0       | Trisomy 18, meiotic nondisjunction                                                               |
| Q91.1       | Trisomy 18, mosaicism (mitotic nondisjunction)                                                   |
| Q91.2       | Trisomy 18, translocation                                                                        |
| Q91.3       | Edwards syndrome, unspecified                                                                    |
| Q91.4       | Trisomy 13, meiotic nondisjunction                                                               |
| Q91.5       | Trisomy 13, mosaicism (mitotic nondisjunction)                                                   |
| Q91.6       | Trisomy 13, translocation                                                                        |
| Q91.7       | Patau syndrome, unspecified                                                                      |
| Q92.0       | Whole chromosome trisomy, meiotic nondisjunction                                                 |
| Q92.1       | Whole chromosome trisomy, mosaicism (mitotic nondisjunction)                                     |
| Q92.2       | Major partial trisomy                                                                            |
| Q92.3       | Minor partial trisomy                                                                            |
| Q92.7       | Triploidy and polyploidy                                                                         |
| Q92.8       | Other specified trisomies and partial trisomies of autosomes                                     |
| Q92.9       | Trisomy and partial trisomy of autosomes, unspecified                                            |
| Q93.3       | Deletion of short arm of chromosome 4                                                            |
| Q93.4       | Deletion of short arm of chromosome 5                                                            |
| Q93.5       | Other deletions of part of a chromosome                                                          |
| Q93.6       | Deletions seen only at prometaphase                                                              |
| Q93.7       | Deletions with other complex rearrangements                                                      |
| Q93.8       | Other deletions from the autosomes                                                               |
| Q93.9       | Deletion from autosomes, unspecified                                                             |
| Q95.2       | Balanced autosomal rearrangement in abnormal individual                                          |
| Q95.3       | Balanced sex/autosomal rearrangement in abnormal individual                                      |
| Q90.0       | Trisomy 21, meiotic nondisjunction                                                               |
| Q90.1       | Trisomy 21, mosaicism (mitotic nondisjunction)                                                   |
| Q90.2       | Trisomy 21, translocation                                                                        |
| Q90.9       | Down syndrome, unspecified                                                                       |
| G35         | Multiple sclerosis                                                                               |
| G40.3       | Generalized idiopathic epilepsy and epileptic syndromes                                          |
| G40.4       | Other generalized epilepsy and epileptic syndromes                                               |
| G40.5       | Special epileptic syndromes                                                                      |
| G40.6       | Grand mal seizures, unspecified (with or without petit mal)                                      |

|    |        |                                                                                      |
|----|--------|--------------------------------------------------------------------------------------|
| 1  |        |                                                                                      |
| 2  | G40.7  | Petit mal, unspecified, without grand mal seizures                                   |
| 3  | G40.8  | Other epilepsy                                                                       |
| 4  | G40.9  | Epilepsy, unspecified                                                                |
| 5  | G41.0  | Grand mal status epilepticus                                                         |
| 6  | G41.1  | Petit mal status epilepticus                                                         |
| 7  | G41.2  | Complex partial status epilepticus                                                   |
| 8  | G41.8  | Other status epilepticus                                                             |
| 9  | G41.9  | Status epilepticus, unspecified                                                      |
| 10 | G46.3  | Brain stem stroke syndrome                                                           |
| 11 | I63    | Cerebral infarction                                                                  |
| 12 | I63.0  | Cerebral infarction due to thrombosis of precerebral arteries                        |
| 13 | I63.1  | Cerebral infarction due to embolism of precerebral arteries                          |
| 14 | I63.2  | Cerebral infarction due to unspecified occlusion or stenosis of precerebral arteries |
| 15 | I63.3  | Cerebral infarction due to thrombosis of cerebral arteries                           |
| 16 | I63.4  | Cerebral infarction due to embolism of cerebral arteries                             |
| 17 | I63.5  | Cerebral infarction due to unspecified occlusion or stenosis of cerebral arteries    |
| 18 | I63.6  | Cerebral infarction due to cerebral venous thrombosis, nonpyogenic                   |
| 19 | I63.8  | Other cerebral infarction                                                            |
| 20 | I63.9  | Cerebral infarction, unspecified                                                     |
| 21 | I64    | Stroke, not specified as haemorrhage or infarction                                   |
| 22 | G30.0  | Alzheimer disease with early onset                                                   |
| 23 | G30.1  | Alzheimer disease with late onset                                                    |
| 24 | G30.8  | Other Alzheimer disease                                                              |
| 25 | G30.9  | Alzheimer disease, unspecified                                                       |
| 26 | F00.0  | Dementia in Alzheimer disease with early onset                                       |
| 27 | F00.1  | Dementia in Alzheimer disease with late onset                                        |
| 28 | F00.2  | Dementia in Alzheimer disease, atypical or mixed type                                |
| 29 | F00.9  | Dementia in Alzheimer disease, unspecified                                           |
| 30 | F01.0  | Vascular dementia of acute onset                                                     |
| 31 | F01.1  | Multi-infarct dementia                                                               |
| 32 | F01.2  | Subcortical vascular dementia                                                        |
| 33 | F01.3  | Mixed cortical and subcortical vascular dementia                                     |
| 34 | F01.8  | Other vascular dementia                                                              |
| 35 | F01.9  | Vascular dementia, unspecified                                                       |
| 36 | F02.0  | Dementia in Pick disease                                                             |
| 37 | F02.1  | Dementia in Creutzfeldt-Jakob disease                                                |
| 38 | F02.2  | Dementia in Huntington disease                                                       |
| 39 | F02.3  | Dementia in Parkinson disease                                                        |
| 40 | F02.4  | Dementia in human immunodeficiency virus [HIV] disease                               |
| 41 | F02.8  | Dementia in other specified diseases classified elsewhere                            |
| 42 | F03    | Unspecified dementia                                                                 |
| 43 | F04    | Organic amnesic syndrome, not induced by alcohol and other psychoactive substances   |
| 44 | F05.0  | Delirium not superimposed on dementia, so described                                  |
| 45 | F05.1  | Delirium superimposed on dementia                                                    |
| 46 | G12.2  | Motor neuron disease                                                                 |
| 47 | G12.20 | Motor neuron disease - Unspecified                                                   |
| 48 | G12.21 | Motor neuron disease - Amyotrophic lateral sclerosis                                 |
| 49 | G12.22 | Motor neuron disease - Progressive bulbar palsy                                      |
| 50 | G12.23 | Motor neuron disease - Primary lateral sclerosis                                     |
| 51 | G12.24 | Motor neuron disease - Familial motor neuron disease                                 |

|    |        |                                                          |
|----|--------|----------------------------------------------------------|
| 1  |        |                                                          |
| 2  | G12.25 | Motor neuron disease - Progressive spinal muscle atrophy |
| 3  | G12.29 | Motor neuron disease - Other motor neuron disease        |
| 4  | G20    | Parkinson Disease                                        |
| 5  | G21.1  | Other drug-induced secondary parkinsonism                |
| 6  | G21.2  | Secondary parkinsonism due to other external agents      |
| 7  | G21.3  | Postencephalitic parkinsonism                            |
| 8  | G21.4  | Vascular parkinsonism                                    |
| 9  | G21.8  | Other secondary parkinsonism                             |
| 10 | G21.9  | Secondary parkinsonism, unspecified                      |
| 11 | G80    | Cerebral Palsy                                           |
| 12 | G80.0  | Spastic quadriplegic cerebral palsy                      |
| 13 | G80.1  | Spastic diplegic cerebral palsy                          |
| 14 | G80.2  | Spastic hemiplegic cerebral palsy                        |
| 15 | G80.3  | Dyskinetic cerebral palsy                                |
| 16 | G80.4  | Ataxic cerebral palsy                                    |
| 17 | G80.8  | Other cerebral palsy                                     |
| 18 | G80.9  | Cerebral palsy, unspecified                              |
| 19 |        |                                                          |
| 20 |        |                                                          |
| 21 |        |                                                          |
| 22 |        |                                                          |
| 23 |        |                                                          |
| 24 |        |                                                          |
| 25 |        |                                                          |
| 26 |        |                                                          |
| 27 |        |                                                          |
| 28 |        |                                                          |
| 29 |        |                                                          |
| 30 |        |                                                          |
| 31 |        |                                                          |
| 32 |        |                                                          |
| 33 |        |                                                          |
| 34 |        |                                                          |
| 35 |        |                                                          |
| 36 |        |                                                          |
| 37 |        |                                                          |
| 38 |        |                                                          |
| 39 |        |                                                          |
| 40 |        |                                                          |
| 41 |        |                                                          |
| 42 |        |                                                          |
| 43 |        |                                                          |
| 44 |        |                                                          |
| 45 |        |                                                          |
| 46 |        |                                                          |
| 47 |        |                                                          |
| 48 |        |                                                          |
| 49 |        |                                                          |
| 50 |        |                                                          |
| 51 |        |                                                          |
| 52 |        |                                                          |
| 53 |        |                                                          |
| 54 |        |                                                          |
| 55 |        |                                                          |
| 56 |        |                                                          |
| 57 |        |                                                          |
| 58 |        |                                                          |
| 59 |        |                                                          |
| 60 |        |                                                          |

1  
2  
3  
4  
5  
6  
7  
8  
9  
10  
11  
12  
13  
14  
15  
16  
17  
18  
19  
20  
21  
22  
23  
24  
25  
26  
27  
28  
29  
30  
31  
32  
33  
34  
35  
36  
37  
38  
39  
40  
41  
42  
43  
44  
45  
46  
47  
48  
49  
50  
51  
52  
53  
54  
55  
56  
57  
58  
59  
60

nt

For peer review only

1  
2 Medcodeid  
3 41677012  
4 91436017  
5 286325014  
6 292830017  
7 292837019  
8 356317017  
9 398809019  
10 482035011  
11 485624014  
12 1491626013  
13 223491000000112  
14 417461000006112  
15 460981000006112  
16 682621000006119  
17 2764761000006118  
18 2764791000006114  
19 2897121000006119  
20 3081891000006110  
21 3747591000006113  
22 5111171000006118  
23 5112151000006119  
24 6250371000006117  
25 12050681000006115  
26 12050691000006117  
27 292553010  
28 459292011  
29 1780311019  
30 72711000006117  
31 84291000006117  
32 84371000006110  
33 84421000006115  
34 84451000006112  
35 2967831017  
36 84411000006111  
37 913931000006116  
38 12332281000006119  
39 8022441000006118  
40 6961081000006118  
41 6970621000006114  
42 12331231000006110  
43 12363721000006110  
44 4757991000006116  
45 6050081000006114  
46 6980001000006117  
47 12704951000006115  
48 84361000006115  
49 913541000006118  
50 84321000006114  
51 913781000006117

For peer review only

1 84401000006113  
2 12331221000006112  
3 12332271000006117  
4 8027491000006113  
5 8024761000006118  
6 12085801000006113  
7 12345471000006114  
8 8022601000006118  
9 12370631000006117  
10 8025181000006114  
11 8040341000006111  
12 8037821000006110  
13 8022431000006111  
14 8022551000006115  
15 8032761000006111  
16 8050091000006115  
17 8022561000006118  
18 8006221000006115  
19 8037831000006113  
20 7969211000006115  
21 12102641000006114  
22 8022401000006115  
23 8027471000006112  
24 12363211000006112  
25 8032741000006112  
26 7287641000006112  
27 8024771000006113  
28 8019531000006110  
29 7696791000006110  
30 3526507010  
31 6967091000006111  
32 8034431000006118  
33 8043591000006119  
34 8027411000006115  
35 12370731000006114  
36 8026051000006110  
37 12370711000006115  
38 12370871000006115  
39 8026071000006117  
40 8034841000006114  
41 8120371000006113  
42 6971871000006117  
43 7098241000006117  
44 8027391000006115  
45 12085811000006111  
46 8232111000006119  
47 12370791000006113  
48 84731000006111  
49 913841000006116  
50 928501000006119

For peer review only

1 616621000006115  
2 913941000006114  
3 84721000006113  
4 913521000006113  
5 913661000006118  
6 84771000006114  
7 7098211000006116  
8 12370361000006118  
9 12363201000006114  
10 7966541000006112  
11 8026061000006112  
12 12085821000006115  
13 12370371000006113  
14 8019521000006112  
15 8027511000006119  
16 12704941000006117  
17 292541011  
18 12332751000006115  
19 12705071000006113  
20 12334621000006111  
21 3537388019  
22 12370281000006118  
23 7708091000006118  
24 7287611000006113  
25 913811000006115  
26 84341000006119  
27 457326014  
28 292540012  
29 7066041000006112  
30 12102631000006116  
31 8077141000006113  
32 12370721000006111  
33 928461000006119  
34 616611000006111  
35 8119341000006116  
36 12370891000006119  
37 8032751000006114  
38 12370801000006114  
39 8019541000006117  
40 8032731000006119  
41 6971901000006117  
42 12332761000006118  
43 12702371000006116  
44 84461000006114  
45 12345461000006119  
46 197984010  
47 3522045015  
48 12370621000006115  
49 7500221000006113  
50 7814941000006115

For peer review only

1  
2 4796311000006117  
3 12102661000006113  
4 8032781000006118  
5 8022541000006117  
6 8119331000006114  
7 12370611000006111  
8 7500251000006116  
9 938301000006114  
10 84441000006110  
11 84331000006112  
12 913481000006113  
13 5754581000006110  
14 12363671000006118  
15 84281000006115  
16 84301000006116  
17 84311000006118  
18 292548017  
19 12489581000006110  
20 7095251000006110  
21 429971019  
22 6969521000006113  
23 12370941000006118  
24 12370931000006111  
25 12370821000006116  
26 8022481000006112  
27 8022491000006110  
28 8027451000006119  
29 8043331000006112  
30 7969221000006111  
31 8043321000006114  
32 8032771000006116  
33 84431000006117  
34 913901000006112  
35 12370271000006116  
36 12363661000006113  
37 8022461000006119  
38 12705001000006119  
39 12702361000006111  
40 84391000006111  
41 12370811000006112  
42 8043601000006110  
43 8034441000006111  
44 12370881000006117  
45 7075891000006110  
46 12370901000006115  
47 12085831000006117  
48 8030331000006117  
49 913451000006117  
50 84351000006117  
51 84381000006113

For peer review only



1 913511000006117  
2 12334611000006115  
3 1665751000000119  
4 459161015  
5 459296014  
6 8025171000006111  
7 12370741000006116  
8 8032081000006115  
9 928521000006112  
10 299601000000114  
11 616681000006116  
12 616591000006117  
13 616601000006113  
14 616641000006110  
15 616651000006112  
16 616671000006119  
17 292482014  
18 616661000006114  
19 459309011  
20 493773010  
21 1223148019  
22 459162010  
23 771381000006115  
24 771401000006115  
25 772141000006118  
26 913651000006115  
27 913831000006114  
28 913921000006119  
29 913981000006115  
30 6051171000006117  
31 280521000006117  
32 2949881000006116  
33 772181000006112  
34 913681000006111  
35 2949871000006119  
36 7587011000006110  
37 771331000006116  
38 771371000006118  
39 771411000006117  
40 772131000006111  
41 772151000006116  
42 787111000006112  
43 771421000006113  
44 73466011  
45 281181000006116  
46 2867421000006114  
47 772171000006114  
48 913711000006112  
49 913891000006113  
50 280541000006112

For peer review only

1  
2 281161000006114  
3 771341000006114  
4 772161000006119  
5 913531000006111  
6 280531000006119  
7  
8 2867431000006112  
9 11927551000006115  
10 459293018  
11 771361000006113  
12 913771000006115  
13 913801000006118  
14 280571000006116  
15 72651000006114  
16 280511000006113  
17 6050071000006111  
18 6050041000006115  
19 77727018  
20 771351000006111  
21 771391000006117  
22 913621000006112  
23 429972014  
24 292551012  
25 429970018  
26 457325013  
27 459294012  
28 292550013  
29 84681000006118  
30 84711000006117  
31 84821000006118  
32 913461000006115  
33 913851000006119  
34 928491000006110  
35 928511000006116  
36 928531000006110  
37 938311000006112  
38 6960431000006119  
39 6970631000006112  
40 6972441000006117  
41 6979991000006111  
42 6050061000006116  
43 6980431000006116  
44 84751000006116  
45 913671000006113  
46 913791000006119  
47 1667941000000112  
48 913491000006111  
49 8022411000006117  
50 8027421000006111  
51 7609891000006111  
52 12102651000006111

For peer review only

1  
2 12363221000006116  
3 12345481000006112  
4 6969531000006111  
5 7098221000006112  
6 84661000006111  
7  
8 7966551000006114  
9 12702381000006118  
10 8014491000006111  
11 928471000006114  
12  
13 84781000006112  
14 84801000006111  
15 2288011000000114  
16 6971881000006119  
17 7098231000006110  
18 913911000006110  
19  
20 292543014  
21 6951081000006112  
22 6954991000006112  
23 6961901000006111  
24 84741000006118  
25  
26 292538019  
27 12450761000006110  
28 8027461000006117  
29 7287621000006117  
30 6955501000006113  
31 6961091000006115  
32 84831000006115  
33 494564012  
34 459163017  
35  
36 8232101000006117  
37 8027481000006110  
38 6971891000006116  
39 11903141000006113  
40 5754621000006110  
41 6965561000006116  
42 913551000006116  
43 459295013  
44 1658861000000113  
45 8030341000006110  
46 7609851000006117  
47 8027401000006118  
48 8027501000006117  
49 84811000006114  
50 84701000006115  
51 6962751000006117  
52 6986151000006117  
53 5754611000006119  
54 913821000006111  
55 72721000006113  
56 84651000006114  
57  
58  
59  
60

For peer review only

1 84671000006116  
2 84761000006119  
3 7287651000006114  
4 3253241000006117  
5 12336111000006119  
6 8440231000006115  
7 7480691000006118  
8 7480711000006115  
9 9312981000006113  
10 6965571000006111  
11 8014501000006115  
12 12336121000006110  
13 7609881000006113  
14 84691000006115  
15 7609841000006119  
16 8022471000006114  
17 8440241000006113  
18 11927561000006118  
19 7783451000006114  
20 7708051000006112  
21 459169018  
22 7480681000006116  
23 7708121000006119  
24 3209431000006116  
25 7708071000006119  
26 84791000006110  
27 3253231000006110  
28 7480701000006118  
29 12344821000006114  
30 8084961000006111  
31 6961101000006114  
32 6951091000006110  
33 6971921000006110  
34 6971911000006119  
35 6960441000006112  
36 6972451000006115  
37 6980441000006114  
38 9312991000006111  
39 7066051000006114  
40 479511000000117  
41 7966931000006114  
42 7966941000006116  
43 12332111000006115  
44 12332101000006118  
45 881451000006113  
46 3209441000006114  
47 6979251000006110  
48 3209431000006116  
49 616481000006119  
50 616491000006116

For peer review only

1  
2 616501000006112  
3 616511000006110  
4 292483016  
5 616531000006116  
6 616541000006114  
7  
8 12718861000006118  
9 616551000006111  
10 616561000006113  
11 616571000006118  
12 616581000006115  
13  
14 5109461000006115  
15 479571000000110  
16 6959811000006110  
17 6977431000006113  
18 6969931000006116  
19 6982521000006119  
20 8084961000006111  
21 7966951000006119  
22 12702391000006115  
23 6959801000006112  
24 12704961000006118  
25 12762301000006111  
26 6983691000006114  
27 12704981000006111  
28 6982511000006110  
29 6982151000006118  
30 12336881000006117  
31 12336871000006115  
32 12705011000006116  
33 6977971000006119  
34 12335681000006111  
35 12335671000006113  
36 6975211000006112  
37 6975221000006116  
38 12363691000006117  
39 7708071000006119  
40 12705081000006111  
41 12363681000006115  
42 850691000006118  
43 1488898011  
44 1667891000000113  
45 7783451000006114  
46 11927561000006118  
47 1223148019  
48 840951000006119  
49 914391000006116  
50 841351000006110  
51 1223147012  
52 6977421000006110  
53 12704991000006114

For peer review only

1  
2 6951281000006117  
3 12702401000006118  
4 6954121000006112  
5 12331061000006114  
6 12331051000006112  
7 12704971000006113  
8 6969921000006119  
9 12334131000006118  
10 12334141000006111  
11 493773010  
12 674961000006118  
13 12485441000006119  
14 281161000006114  
15 281181000006116  
16 73466011  
17 280571000006116  
18 281171000006119  
19 459309011  
20 281211000006117  
21 280511000006113  
22 280521000006117  
23 280531000006119  
24 280541000006112  
25 280551000006114  
26 280561000006111  
27 280581000006118  
28 280591000006115  
29 587111000006111  
30 587521000006111  
31 641581000006115  
32 457328010  
33 6985001000006110  
34 6985011000006113  
35 6959091000006114  
36 6981621000006113  
37 12363731000006113  
38 7708121000006119  
39 4796321000006113  
40 1988741000006117  
41 11931861000006112  
42 5110001000006118  
43 12336541000006114  
44 12336531000006116  
45 84471000006119  
46 197761014  
47 84481000006116  
48 292590011  
49 2288071000000116  
50 7281511000006118  
51 84491000006118

For peer review only

1 459310018  
2 84501000006114  
3 914301000006111  
4 938321000006116  
5 84511000006112  
6 292583018  
7 299621000000117  
8 4758011000006112  
9 84521000006116  
10 459167016  
11 928581000006111  
12 928601000006118  
13 84531000006118  
14 914221000006113  
15 84541000006111  
16 292577016  
17 84551000006113  
18 914261000006119  
19 84561000006110  
20 914071000006115  
21 84571000006115  
22 459313016  
23 84581000006117  
24 914051000006113  
25 84591000006119  
26 459308015  
27 928561000006118  
28 928541000006117  
29 84601000006110  
30 914241000006118  
31 84611000006113  
32 914031000006118  
33 84621000006117  
34 914151000006112  
35 84631000006119  
36 292579018  
37 84641000006112  
38 457329019  
39 1665721000000112  
40 84841000006113  
41 493774016  
42 84851000006110  
43 292589019  
44 2288061000000111  
45 84861000006112  
46 459311019  
47 84871000006117  
48 914311000006114  
49 938331000006118  
50 12489851000006117

For peer review only

1  
2 84881000006119  
3 292582011  
4 1667921000000117  
5 84891000006116  
6 459169018  
7  
8 928591000006114  
9 928611000006115  
10 84901000006117  
11 914231000006111  
12 84911000006119  
13  
14 292576013  
15 84921000006110  
16 914271000006114  
17 84931000006113  
18 914081000006117  
19  
20 12702411000006115  
21 84941000006115  
22 459312014  
23 84951000006118  
24 914061000006110  
25 12702421000006111  
26 84961000006116  
27 459306016  
28 928571000006113  
29 928551000006115  
30 84971000006111  
31 914251000006116  
32 84981000006114  
33 914041000006111  
34 84991000006112  
35 914161000006114  
36 85001000006117  
37 292581016  
38 85011000006119  
39 457330012  
40 1658901000000118  
41 840971000006112  
42  
43  
44  
45  
46  
47  
48  
49  
50  
51  
52  
53  
54  
55  
56  
57  
58  
59  
60

For peer review only



1  
2 Term

3 Addisonian crisis

4 Adrenal medullary insufficiency

5 Tuberculosis of adrenal glands - Addison's disease

6 Drug-induced adrenocortical insufficiency

7 Hypoadrenalism

8 Adrenal insufficiency

9 Corticoadrenal insufficiency NOS

10 Acute adrenal insufficiency

11 Addison's disease

12 Corticoadrenal insufficiency

13 Addison's anaemia

14 Primary adrenocortical insufficiency

15 Addisonian crisis

16 Myopathy due to Addison's disease

17 Hypocortisolism secondary to another disorder

18 Secondary adrenal insufficiency

19 Severe adrenal insufficiency

20 Acute adrenal insufficiency with meningococcal septicaemia

21 Addison's disease due to autoimmunity

22 Secondary hypoadrenalism

23 Iatrogenic adrenal insufficiency

24 Addison disease

25 Addisonian crisis

26 Acute adrenocortical insufficiency

27 Type 1 diabetes mellitus maturity onset

28 Type 1 diabetes mellitus with arthropathy

29 Type 1 diabetes mellitus with persistent microalbuminuria

30 Unstable type 1 diabetes mellitus

31 Type 1 diabetes mellitus - poor control

32 Type 1 diabetes mellitus with nephropathy

33 Type 1 diabetes mellitus with polyneuropathy

34 Type 1 diabetes mellitus with ulcer

35 Pre-existing type 1 diabetes mellitus in pregnancy

36 Type 1 diabetes mellitus with peripheral angiopathy

37 Type 1 diabetes mellitus with peripheral angiopathy

38 Retinopathy co-occurrent and due to type 1 diabetes mellitus

39 Neuropathic arthropathy due to type 1 diabetes mellitus

40 Gangrene associated with type 1 diabetes mellitus

41 Peripheral circulatory disorder associated with type 1 diabetes mellitus

42 Exudative maculopathy co-occurrent and due to type 1 diabetes mellitus

43 Polyneuropathy co-occurrent and due to type 1 diabetes mellitus

44 Type 1 diabetes mellitus with hyperosmolar coma

45 Type 1 diabetes mellitus with hypoglycemic coma

46 Kidney disorder associated with type 1 diabetes mellitus

47 Diabetic retinopathy associated with type 1 diabetes mellitus

48 Type 1 diabetes mellitus with multiple complications

49 Type 1 diabetes mellitus with multiple complications

50 Type 1 diabetes mellitus with diabetic cataract

51 Type 1 diabetes mellitus with mononeuropathy

1 Type 1 diabetes mellitus with ophthalmic complications  
2 Exudative maculopathy with type 1 diabetes mellitus  
3 Retinopathy with type 1 diabetes mellitus  
4 Chronic kidney disease stage 5 due to type 1 diabetes mellitus  
5 Traction retinal detachment due to type 1 diabetes mellitus  
6 Macular oedema due to type 1 diabetes mellitus  
7 Lumbosacral radiculoplexus neuropathy co-occurrent and due to type 1 diabetes mellitus  
8 Chronic ulcer of skin due to type 1 diabetes mellitus  
9 Peripheral neuropathy with type 1 diabetes mellitus  
10 Hypoglycemia due to type 1 diabetes mellitus  
11 Hypertension concurrent and due to end stage renal disease on dialysis due to type 1 diabetes mellitus  
12 Hypoglycaemic unawareness in type 1 diabetes mellitus  
13 Nephrotic syndrome due to type 1 diabetes mellitus  
14 Severe malnutrition due to type 1 diabetes mellitus  
15 Vitreous haemorrhage due to type 1 diabetes mellitus  
16 Foot ulcer due to type 1 diabetes mellitus  
17 Osteomyelitis due to type 1 diabetes mellitus  
18 Microalbuminuria due to type 1 diabetes mellitus  
19 Hypoglycemic unawareness in type 1 diabetes mellitus  
20 Mixed hyperlipidaemia due to type 1 diabetes mellitus  
21 Cranial nerve palsy due to type 1 diabetes mellitus  
22 Hypertension in chronic kidney disease due to type 1 diabetes mellitus  
23 Chronic kidney disease stage 4 due to type 1 diabetes mellitus  
24 Autonomic neuropathy co-occurrent and due to type 1 diabetes mellitus  
25 Retinal ischemia due to type 1 diabetes mellitus  
26 Type 1 diabetes mellitus well controlled  
27 Rubeosis iridis due to type 1 diabetes mellitus  
28 Proliferative retinopathy due to type 1 diabetes mellitus  
29 Diabetic autonomic neuropathy due to type 1 diabetes mellitus  
30 Disorder of nerve co-occurrent and due to type 1 diabetes mellitus  
31 Diabetic oculopathy associated with type 1 diabetes mellitus  
32 Retinal oedema due to type 1 diabetes mellitus  
33 Mild nonproliferative retinopathy due to type 1 diabetes mellitus  
34 Chronic kidney disease stage 2 due to type 1 diabetes mellitus  
35 Rubeosis iridis with type 1 diabetes mellitus  
36 Ankle ulcer due to type 1 diabetes mellitus  
37 Traction retinal detachment with type 1 diabetes mellitus  
38 Retinal oedema with type 1 diabetes mellitus  
39 Forefoot ulcer due to type 1 diabetes mellitus  
40 Ulcer of lower limb due to type 1 diabetes mellitus  
41 Dyslipidemia due to type 1 diabetes mellitus  
42 Hypoglycaemic coma in type 1 diabetes mellitus  
43 Dietary advice for type 1 diabetes  
44 Chronic kidney disease stage 1 due to type 1 diabetes mellitus  
45 Macular edema due to type 1 diabetes mellitus  
46 Referral to type 1 diabetes structured education programme  
47 Retinal ischaemia with type 1 diabetes mellitus  
48 Multiple complications of type 1 diabetes mellitus  
49 Renal disorder associated with type 1 diabetes mellitus  
50 Ketoacidosis in type 1 diabetes mellitus

1 Type 1 diabetes mellitus without complication  
2 Peripheral angiopathy due to type 1 diabetes mellitus  
3 Mononeuropathy with type 1 diabetes mellitus  
4 Neurological disorder with type 1 diabetes mellitus  
5 Retinopathy with type 1 diabetes mellitus  
6 Disorder of eye with type 1 diabetes mellitus  
7 Dietary education for type 1 diabetes mellitus  
8 Erectile dysfunction with type 1 diabetes mellitus  
9 Autonomic neuropathy with type 1 diabetes mellitus  
10 Diabetic erectile dysfunction associated with type 1 diabetes mellitus  
11 Heel AND/OR midfoot ulcer due to type 1 diabetes mellitus  
12 Macular edema co-occurrent and due to type 1 diabetes mellitus  
13 Erectile dysfunction co-occurrent and due to type 1 diabetes mellitus  
14 Nonproliferative diabetic retinopathy due to type 1 diabetes mellitus  
15 End stage renal disease on dialysis due to type 1 diabetes mellitus  
16 Neurological disorder associated with type 1 diabetes mellitus  
17 Type 1 diabetes mellitus with gangrene  
18 Mononeuropathy with type 1 diabetes mellitus  
19 Gastroparesis due to type 1 diabetes mellitus  
20 Neurological disorder co-occurrent and due to type 1 diabetes mellitus  
21 Diabetic oculopathy due to type 1 diabetes mellitus  
22 Disorder of eye co-occurrent and due to type 1 diabetes mellitus  
23 Polyneuropathy due to type 1 diabetes mellitus  
24 Type 1 diabetes mellitus uncontrolled  
25 Type 1 diabetes mellitus with polyneuropathy  
26 Type 1 diabetes mellitus with hypoglycaemic coma  
27 Type 1 diabetes mellitus without complication  
28 Type 1 diabetes mellitus with ulcer  
29 Small vessel disease due to type 1 diabetes mellitus  
30 Cranial nerve palsy with type 1 diabetes mellitus  
31 Proteinuria due to type 1 diabetes mellitus  
32 Traction retinal detachment co-occurrent and due to type 1 diabetes mellitus  
33 Persistent proteinuria associated with type 1 diabetes mellitus  
34 Disorder due to type 1 diabetes mellitus  
35 Hyperglycemia due to type 1 diabetes mellitus  
36 Retinal oedema co-occurrent and due to type 1 diabetes mellitus  
37 Diabetic vitreous haemorrhage due to type 1 diabetes mellitus  
38 Retinal ischemia with type 1 diabetes mellitus  
39 Blindness due to type 1 diabetes mellitus  
40 Retinal ischaemia due to type 1 diabetes mellitus  
41 Hypoglycemic coma in type 1 diabetes mellitus  
42 Mononeuropathy co-occurrent and due to type 1 diabetes mellitus  
43 Mononeuropathy associated with type 1 diabetes mellitus  
44 Type 1 diabetes mellitus without complication  
45 Lumbosacral radiculoplexus neuropathy with type 1 diabetes mellitus  
46 Type 1 diabetes mellitus  
47 Hyperosmolarity due to type 1 diabetes mellitus  
48 Blindness co-occurrent and due to type 1 diabetes mellitus  
49 Pre-existing type 1 diabetes mellitus in pregnancy  
50 Acidosis due to type 1 diabetes mellitus

- 1 Pre-existing type 1 diabetes mellitus
- 2
- 3 Cranial nerve palsy co-occurrent and due to type 1 diabetes mellitus
- 4 Diabetic vitreous hemorrhage due to type 1 diabetes mellitus
- 5 Diabetic dermopathy due to type 1 diabetes mellitus
- 6 Hyperglycaemia due to type 1 diabetes mellitus
- 7
- 8 Nonproliferative retinopathy co-occurrent and due to type 1 diabetes mellitus
- 9 Pregnancy and type 1 diabetes mellitus
- 10 Exudative maculopathy with type 1 diabetes mellitus
- 11 Type 1 diabetes mellitus with retinopathy
- 12 Type 1 diabetes mellitus with gangrene
- 13 Type 1 diabetes mellitus with ophthalmic complications
- 14
- 15 Brittle type 1 diabetes mellitus
- 16 Gastroparesis co-occurrent and due to type 1 diabetes mellitus
- 17 Type 1 diabetes mellitus
- 18 Type 1 diabetes mellitus maturity onset
- 19 Type 1 diabetes mellitus with arthropathy
- 20 Type 1 diabetes mellitus - poor control
- 21 Type 1 diabetes mellitus with gangrene
- 22 Hyperosmolality due to uncontrolled type 1 diabetes mellitus
- 23 Unstable type 1 diabetes mellitus
- 24
- 25 Persistent microalbuminuria associated with type 1 diabetes mellitus
- 26 Moderate nonproliferative retinopathy co-occurrent and due to type 1 diabetes mellitus
- 27 Mild nonproliferative retinopathy co-occurrent and due to type 1 diabetes mellitus
- 28 Retinal ischemia co-occurrent and due to type 1 diabetes mellitus
- 29 Peripheral neuropathy due to type 1 diabetes mellitus
- 30 Peripheral neuropathy co-occurrent and due to type 1 diabetes mellitus
- 31 Chronic kidney disease stage 3 due to type 1 diabetes mellitus
- 32 Hyperlipidemia due to type 1 diabetes mellitus
- 33 Mixed hyperlipidemia due to type 1 diabetes mellitus
- 34 Hyperlipidaemia due to type 1 diabetes mellitus
- 35 Vitreous hemorrhage due to type 1 diabetes mellitus
- 36 Type 1 diabetes mellitus with renal complications
- 37 Type 1 diabetes mellitus with diabetic cataract
- 38 Disorder of eye with type 1 diabetes mellitus
- 39 Gastroparesis with type 1 diabetes mellitus
- 40 Diabetic neuropathic arthropathy due to type 1 diabetes mellitus
- 41 Exudative maculopathy associated with type 1 diabetes mellitus
- 42 Diabetic cataract associated with type 1 diabetes mellitus
- 43 Type 1 diabetes mellitus with neuropathic arthropathy
- 44 Retinal ischaemia co-occurrent and due to type 1 diabetes mellitus
- 45 Moderate nonproliferative retinopathy due to type 1 diabetes mellitus
- 46 Retinal edema due to type 1 diabetes mellitus
- 47 Retinal edema with type 1 diabetes mellitus
- 48 Amyotrophy due to type 1 diabetes mellitus
- 49 Retinal edema co-occurrent and due to type 1 diabetes mellitus
- 50 Macular oedema co-occurrent and due to type 1 diabetes mellitus
- 51 Chronic kidney disease due to type 1 diabetes mellitus
- 52 Type 1 diabetes mellitus with renal complications
- 53 Type 1 diabetes mellitus with mononeuropathy
- 54 Type 1 diabetes mellitus with neurological complications
- 55
- 56
- 57
- 58
- 59
- 60

1 Type 1 diabetes mellitus with neurological complications  
2 Neurological disorder with type 1 diabetes mellitus  
3 Type 1 diabetic dietary review  
4 Type 1 diabetes mellitus with hypoglycaemic coma  
5 Type 1 diabetes mellitus with neuropathic arthropathy  
6 Hypoglycaemia due to type 1 diabetes mellitus  
7 Rubeosis iridis co-occurrent and due to type 1 diabetes mellitus  
8 Sensory neuropathy due to type 1 diabetes mellitus  
9 Ketoacidotic coma in type 1 diabetes mellitus  
10 Gastroparesis with type 1 diabetes mellitus  
11 Diabetes mellitus, juvenile, + other specified manifestation  
12 Diabetes mellitus, juvenile + peripheral circulatory disorder  
13 Diabetes mellitus, juvenile type, + ophthalmic manifestation  
14 Diabetes mellitus, juvenile type, with ketoacidosis  
15 Diabetes mellitus, juvenile type, with ketoacidotic coma  
16 Diabetes mellitus, juvenile, + neurological manifestation  
17 Diabetes mellitus, juvenile type, with hyperosmolar coma  
18 Diabetes mellitus, juvenile type, with renal manifestation  
19 Non-insulin dependent diabetes mellitus with arthropathy  
20 NIDDM - Non-insulin dependent diabetes mellitus  
21 Insulin treated non-insulin dependent diabetes mellitus  
22 Insulin dependent diabetes mellitus with hypoglycaemic coma  
23 Insulin dependent diabetes mellitus with multiple complicatn  
24 Insulin dependent diabetes mellitus with polyneuropathy  
25 Insulin dependent diab mell with peripheral angiopathy  
26 Insulin dependent diabetes mellitus with retinopathy  
27 Insulin dependent diabetes mellitus with nephropathy  
28 Insulin dependent diab mell with peripheral angiopathy  
29 Insulin dependent diab mell with neuropathic arthropathy  
30 Insulin dependent diabetes mellitus with arthropathy  
31 Non-insulin dependent diabetes mellitus with mononeuropathy  
32 Insulin dependent diabetes mellitus type 1B  
33 Insulin dependent diabetes mellitus - poor control  
34 Insulin dependent diabetes mellitus - poor control  
35 Insulin dependent diabetes mellitus type 1B  
36 Maternal history of non-insulin dependent diabetes mellitus  
37 Insulin dependent diabetes mellitus with arthropathy  
38 Insulin dependent diabetes mellitus with mononeuropathy  
39 Insulin dependent diabetes mellitus with retinopathy  
40 Insulin dependent diab mell with neuropathic arthropathy  
41 Insulin dependent diabetes maturity onset  
42 IDDM-Insulin dependent diabetes mellitus  
43 Insulin dependent diabetes mellitus with ulcer  
44 Non-insulin dependent diabetes mellitus  
45 Non-insulin dependent diabetes mellitus with neuropathic arthropathy  
46 Insulin dependent diabetes mellitus type 1A  
47 Insulin dependent diabetes mellitus  
48 Insulin dependent diabetes maturity onset  
49 Insulin dependent diabetes mellitus with diabetic cataract  
50 Non-insulin dependent diabetes mellitus with polyneuropathy

1 Non-insulin depend diabetes mellitus with diabetic cataract  
2 Insulin dependent diabetes mellitus with diabetic cataract  
3 Insulin dependent diabetes mellitus  
4 Insulin dependent diabetes mellitus with multiple complicat  
5 Non-insulin dependent diabetes mellitus with nephropathy  
6 Insulin dependent diabetes mellitus type IA  
7 Insulin dependent diabetes mellitus with ulcer  
8 Insulin dependent diabetes mellitus with arthropathy  
9 Insulin dependent diabetes mellitus with hypoglycaemic coma  
10 Insulin dependent diabetes mellitus with mononeuropathy  
11 Insulin dependent diabetes mellitus with polyneuropathy  
12 Non-insulin dependent diabetes mellitus  
13 Unstable insulin dependent diabetes mellitus  
14 Non-insulin dependent diabetes mellitus with hypoglyca coma  
15 Insulin dependent diabetes mellitus with hypoglycemic coma  
16 Insulin dependent diabetes mellitus with hypoglycaemic coma  
17 Insulin dependent diabetes mellitus  
18 Insulin dependent diabetes mellitus with gangrene  
19 Insulin dependent diabetes mellitus with nephropathy  
20 Insulin dependent diabetes mellitus with gangrene  
21 Unstable insulin dependent diabetes mellitus  
22 Type I diabetes mellitus maturity onset  
23 Unstable type I diabetes mellitus  
24 Type I diabetes mellitus without complication  
25 Type I diabetes mellitus with arthropathy  
26 Type I diabetes mellitus - poor control  
27 Type I diabetes mellitus with arthropathy  
28 Type I diabetes mellitus with hypoglycaemic coma  
29 Type I diabetes mellitus with ulcer  
30 Type I diabetes mellitus with renal complications  
31 Type I diabetes mellitus with nephropathy  
32 Type I diabetes mellitus with persistent microalbuminuria  
33 Type I diabetes mellitus with ketoacidosis  
34 Type I diabetes mellitus with ketoacidotic coma  
35 Type I diabetes mellitus with exudative maculopathy  
36 Diabetic retinopathy associated with type I diabetes mellitus  
37 Peripheral circulatory disorder associated with type I diabetes mellitus  
38 Neurological disorder associated with type I diabetes mellitus  
39 Renal disorder associated with type I diabetes mellitus  
40 Type I diabetes mellitus with hypoglycemic coma  
41 Diabetic cataract associated with type I diabetes mellitus  
42 Type I diabetes mellitus with neurological complications  
43 Type I diabetes mellitus with retinopathy  
44 Type I diabetes mellitus with mononeuropathy  
45 Type I diabetes mellitus with gastroparesis  
46 Type I diabetes mellitus with ophthalmic complications  
47 Hypertension in chronic kidney disease due to type I diabetes mellitus  
48 Chronic kidney disease stage 2 due to type I diabetes mellitus  
49 Retinopathy due to brittle type I diabetes mellitus  
50 Cranial nerve palsy with type I diabetes mellitus



1  
2 Autonomic neuropathy with type I diabetes mellitus  
3 Lumbosacral radiculoplexus neuropathy with type I diabetes mellitus  
4 Persistent microalbuminuria associated with type I diabetes mellitus  
5 Dietary education for type I diabetes mellitus  
6 Type I diabetes mellitus poorly controlled  
7 Erectile dysfunction associated with type I diabetes mellitus  
8 Diabetic oculopathy due to type I diabetes mellitus  
9 Peripheral vascular disease due to type I diabetes  
10 Type I diabetes mellitus with persistent proteinuria  
11 Type I diabetes mellitus with peripheral angiopathy  
12 Type I diabetes mellitus with renal complications  
13 Type I diabetes mellitus in remission  
14 Hypoglycemic coma in type I diabetes mellitus  
15 Dietary advice for type I diabetes  
16 Type I diabetes mellitus with diabetic cataract  
17 Type I diabetes mellitus with gangrene  
18 Ketoacidosis in type I diabetes mellitus  
19 Exudative maculopathy associated with type I diabetes mellitus  
20 Disorder associated with type I diabetes mellitus  
21 Type I diabetes mellitus with nephropathy  
22 Type I diabetes mellitus with ulcer  
23 Type I diabetes mellitus with gangrene  
24 Chronic kidney disease stage 3 due to type I diabetes mellitus  
25 Type I diabetes mellitus uncontrolled  
26 Persistent proteinuria associated with type I diabetes mellitus  
27 Gangrene associated with type I diabetes mellitus  
28 Type I diabetes mellitus without complication  
29 Type I diabetes mellitus  
30 Type I diabetes mellitus with hypoglycaemic coma  
31 Referral to type I diabetes structured education programme  
32 Chronic kidney disease stage 4 due to type I diabetes mellitus  
33 Hypoglycaemic coma in type I diabetes mellitus  
34 Diabetic oculopathy associated with type I diabetes mellitus  
35 Labile type I diabetes mellitus  
36 Ketoacidotic coma in type I diabetes mellitus  
37 Type I diabetes mellitus with multiple complications  
38 Type I diabetes mellitus with neuropathic arthropathy  
39 Type I diabetic dietary review  
40 Chronic kidney disease due to type I diabetes mellitus  
41 Neuropathy due to brittle type I diabetes mellitus  
42 Chronic kidney disease stage 1 due to type I diabetes mellitus  
43 Chronic kidney disease stage 5 due to type I diabetes mellitus  
44 Type I diabetes mellitus with retinopathy  
45 Type I diabetes mellitus with gangrene  
46 Mononeuropathy associated with type I diabetes mellitus  
47 Multiple complications of type I diabetes mellitus  
48 Brittle type I diabetes mellitus  
49 Type I diabetes mellitus with polyneuropathy  
50 Unstable type I diabetes mellitus  
51 Type I diabetes mellitus

1 Type I diabetes mellitus maturity onset  
2 Type I diabetes mellitus with neuropathic arthropathy  
3 Type I diabetes mellitus well controlled  
4 Diabetes mellitus type 1  
5 Cataract due to diabetes mellitus type 1  
6 Eating disorder co-occurrent with diabetes mellitus type 1  
7 H/O diabetes mellitus type 1  
8 History of diabetes mellitus type 1  
9 Skin ulcer of toe due to diabetes mellitus type 1  
10 Diabetes mellitus type 1 with ketoacidotic coma  
11 Diabetes mellitus type 1 without retinopathy  
12 Cataract co-occurrent and due to diabetes mellitus type 1  
13 Retinopathy due to unstable diabetes mellitus type 1  
14 Cataract due to diabetes mellitus type 1  
15 Neuropathy due to unstable diabetes mellitus type 1  
16 Diabetes mellitus type 1 with diabetic Charcot's arthropathy  
17 ED-DMT1 - Eating disorder-diabetes mellitus type 1  
18 Hypoglycemic coma co-occurrent and due to diabetes mellitus type II  
19 Hypoglycaemic coma co-occurrent and due to diabetes mellitus type II  
20 Gastroparesis due to diabetes mellitus type I  
21 Hypoglycaemic coma co-occurrent and due to diabetes mellitus type II  
22 History of diabetes mellitus type II  
23 Polyneuropathy due to diabetes mellitus type II  
24 Diabetes mellitus type II  
25 Gastroparesis due to diabetes mellitus type II  
26 Polyneuropathy due to diabetes mellitus type I  
27 Diabetes mellitus type I  
28 History of diabetes mellitus type I  
29 Diabetes type II with amyotrophy  
30 Diabetes type II review  
31 Diabetes type 1 with gangrene  
32 Diabetes type 1 with ketoacidosis  
33 Diabetes type 1 with hypoglycaemic coma  
34 Diabetes type 1 with hypoglycemic coma  
35 Diabetes type 1 with retinopathy  
36 Diabetes type 1 with neurological disorder  
37 Diabetes type 1 with cataract  
38 Diabetes type 1 with diabetic ulcer of toe, skin breakdown  
39 Diabetes type 1 with small vessel disease  
40 Diabetes type 1 review  
41 Angina associated with type 2 diabetes mellitus  
42 Angina associated with type II diabetes mellitus  
43 Cataract co-occurrent and due to diabetes mellitus type 2  
44 Cataract due to diabetes mellitus type 2  
45 Diabetes mellitus -adult onset  
46 Diabetes mellitus type 2  
47 Diabetes mellitus type 2 with ketoacidotic coma  
48 Diabetes mellitus type II  
49 Diabetes mellitus, adult onset, + neurological manifestation  
50 Diabetes mellitus, adult onset, + ophthalmic manifestation



1 Diabetes mellitus, adult onset, + unspecified complication  
2 Diabetes mellitus, adult onset, no mention of complication  
3 Diabetes mellitus, adult onset, with hyperosmolar coma  
4 Diabetes mellitus, adult onset, with ketoacidosis  
5 Diabetes mellitus, adult onset, with ketoacidotic coma  
6 Diabetes mellitus, adult onset, with no mention of complication  
7 Diabetes mellitus, adult onset, with renal manifestation  
8 Diabetes mellitus, adult with gangrene  
9 Diabetes mellitus, adult, + other specified manifestation  
10 Diabetes mellitus, adult, + peripheral circulatory disorder  
11 Diabetes type 2 on insulin  
12 Diabetes type 2 review  
13 Diabetes type 2 with cataract  
14 Diabetes type 2 with ketoacidosis  
15 Diabetes type 2 with neurological disorder  
16 Diabetes type 2 with retinopathy  
17 Diabetes type II review  
18 Diabetic angina pectoris associated with type 2 diabetes mellitus  
19 Diabetic cataract associated with type 2 diabetes mellitus  
20 Diabetic cataract associated with type II diabetes mellitus  
21 Diabetic oculopathy associated with type 2 diabetes mellitus  
22 Diabetic oculopathy associated with type 2 diabetes mellitus  
23 Diabetic oculopathy associated with type II diabetes mellitus  
24 Diabetic retinopathy associated with type 2 diabetes mellitus  
25 Diabetic retinopathy associated with type II diabetes mellitus  
26 Disorder due to type II diabetes mellitus  
27 Disorder of eye co-occurrent and due to type 2 diabetes mellitus  
28 Disorder of eye with type 2 diabetes mellitus  
29 Exudative maculopathy associated with type 2 diabetes mellitus  
30 Exudative maculopathy associated with type II diabetes mellitus  
31 Exudative maculopathy co-occurrent and due to type 2 diabetes mellitus  
32 Exudative maculopathy with type 2 diabetes mellitus  
33 Gangrene associated with type 2 diabetes mellitus  
34 Gangrene associated with type II diabetes mellitus  
35 Gastroparesis co-occurrent and due to type 2 diabetes mellitus  
36 Gastroparesis due to diabetes mellitus type II  
37 Gastroparesis due to type 2 diabetes mellitus  
38 Gastroparesis with type 2 diabetes mellitus  
39 Hyperosmolar non-ketotic state in type 2 diabetes mellitus  
40 Hyperosmolar non-ketotic state in type 2 diabetes mellitus  
41 Hyperosmolar non-ketotic state in type II diabetes mellitus  
42 Hypoglycaemic coma co-occurrent and due to diabetes mellitus type II  
43 Hypoglycemic coma co-occurrent and due to diabetes mellitus type II  
44 Insulin treated non-insulin dependent diabetes mellitus  
45 Insulin treated Type 2 diabetes mellitus  
46 Insulin treated Type 2 diabetes mellitus  
47 Insulin treated Type II diabetes mellitus  
48 Insulin treated Type II diabetes mellitus  
49 Ketoacidosis in type II diabetes mellitus  
50 Ketoacidotic coma in type 2 diabetes mellitus

1 Kidney disorder associated with type 2 diabetes mellitus  
2 Mononeuropathy associated with type 2 diabetes mellitus  
3 Mononeuropathy associated with type II diabetes mellitus  
4 Mononeuropathy co-occurrent and due to type 2 diabetes mellitus  
5 Mononeuropathy with type 2 diabetes mellitus  
6 Neurologic disorder associated with type 2 diabetes mellitus  
7 Neurologic disorder associated with type II diabetes mellitus  
8 Neurological disorder co-occurrent and due to type 2 diabetes mellitus  
9 Neurological disorder with diabetes type 2  
10 NIDDM - Non-insulin dependent diabetes mellitus  
11 NIDDM with peripheral circulatory disorder  
12 NIDDM with peripheral circulatory disorder  
13 Non-insulin depend diabetes mellitus with diabetic cataract  
14 Non-insulin dependent d m with neuropathic arthropathy  
15 Non-insulin dependent diabetes mellitus  
16 Non-insulin dependent diabetes mellitus  
17 Non-insulin dependent diabetes mellitus - poor control  
18 Non-insulin dependent diabetes mellitus with arthropathy  
19 Non-insulin dependent diabetes mellitus with gangrene  
20 Non-insulin dependent diabetes mellitus with hypoglyca coma  
21 Non-insulin dependent diabetes mellitus with mononeuropathy  
22 Non-insulin dependent diabetes mellitus with nephropathy  
23 Non-insulin dependent diabetes mellitus with polyneuropathy  
24 Non-insulin dependent diabetes mellitus with ulcer  
25 Non-insulin-dependent d m with peripheral angiopath  
26 Non-insulin-dependent diabetes mellitus with multiple comps  
27 Non-insulin-dependent diabetes mellitus with neuro comps  
28 Non-insulin-dependent diabetes mellitus with ophthalm comps  
29 Non-insulin-dependent diabetes mellitus with renal comps  
30 Non-insulin-dependent diabetes mellitus with retinopathy  
31 Non-insulin-dependent diabetes mellitus without complication  
32 Peripheral circulatory disorder associated with type 2 diabetes mellitus  
33 Peripheral circulatory disorder associated with type II diabetes mellitus  
34 Persistent microalbuminuria associated with type II diabetes mellitus  
35 Persistent proteinuria associated with type II diabetes mellitus  
36 Polyneuropathy co-occurrent and due to type 2 diabetes mellitus  
37 Polyneuropathy due to diabetes mellitus type II  
38 Pre-existing type 2 diabetes mellitus  
39 Pre-existing type 2 diabetes mellitus in pregnancy  
40 Pre-existing type 2 diabetes mellitus in pregnancy  
41 Pregnancy and type 2 diabetes mellitus  
42 Retinopathy co-occurrent and due to type 2 diabetes mellitus  
43 Retinopathy with type 2 diabetes mellitus  
44 Type 2 diabetes mellitus  
45 Type 2 diabetes mellitus  
46 Type 2 diabetes mellitus - poor control  
47 Type 2 diabetes mellitus - poor control  
48 Type 2 diabetes mellitus in remission  
49 Type 2 diabetes mellitus uncontrolled  
50 Type 2 diabetes mellitus with arthropathy

1 Type 2 diabetes mellitus with arthropathy  
2 Type 2 diabetes mellitus with diabetic cataract  
3 Type 2 diabetes mellitus with diabetic cataract  
4 Type 2 diabetes mellitus with exudative maculopathy  
5 Type 2 diabetes mellitus with gangrene  
6 Type 2 diabetes mellitus with gangrene  
7 Type 2 diabetes mellitus with gastroparesis  
8 Type 2 diabetes mellitus with hyperosmolar coma  
9 Type 2 diabetes mellitus with hypoglycaemic coma  
10 Type 2 diabetes mellitus with hypoglycaemic coma  
11 Type 2 diabetes mellitus with ketoacidosis  
12 Type 2 diabetes mellitus with ketoacidotic coma  
13 Type 2 diabetes mellitus with mononeuropathy  
14 Type 2 diabetes mellitus with mononeuropathy  
15 Type 2 diabetes mellitus with multiple complications  
16 Type 2 diabetes mellitus with multiple complications  
17 Type 2 diabetes mellitus with nephropathy  
18 Type 2 diabetes mellitus with nephropathy  
19 Type 2 diabetes mellitus with neurological complications  
20 Type 2 diabetes mellitus with neurological complications  
21 Type 2 diabetes mellitus with neuropathic arthropathy  
22 Type 2 diabetes mellitus with neuropathic arthropathy  
23 Type 2 diabetes mellitus with ophthalmic complications  
24 Type 2 diabetes mellitus with ophthalmic complications  
25 Type 2 diabetes mellitus with peripheral angiopathy  
26 Type 2 diabetes mellitus with peripheral angiopathy  
27 Type 2 diabetes mellitus with persistent microalbuminuria  
28 Type 2 diabetes mellitus with persistent proteinuria  
29 Type 2 diabetes mellitus with polyneuropathy  
30 Type 2 diabetes mellitus with polyneuropathy  
31 Type 2 diabetes mellitus with renal complications  
32 Type 2 diabetes mellitus with renal complications  
33 Type 2 diabetes mellitus with retinopathy  
34 Type 2 diabetes mellitus with retinopathy  
35 Type 2 diabetes mellitus with ulcer  
36 Type 2 diabetes mellitus with ulcer  
37 Type 2 diabetes mellitus without complication  
38 Type 2 diabetes mellitus without complication  
39 Type 2 diabetic dietary review  
40 Type II diabetes mellitus  
41 Type II diabetes mellitus  
42 Type II diabetes mellitus - poor control  
43 Type II diabetes mellitus - poor control  
44 Type II diabetes mellitus in remission  
45 Type II diabetes mellitus with arthropathy  
46 Type II diabetes mellitus with arthropathy  
47 Type II diabetes mellitus with diabetic cataract  
48 Type II diabetes mellitus with diabetic cataract  
49 Type II diabetes mellitus with exudative maculopathy  
50 Type II diabetes mellitus with exudative maculopathy

- 1
- 2 Type II diabetes mellitus with gangrene
- 3 Type II diabetes mellitus with gangrene
- 4 Type II diabetes mellitus with gastroparesis
- 5 Type II diabetes mellitus with hypoglycaemic coma
- 6 Type II diabetes mellitus with hypoglycaemic coma
- 7 Type II diabetes mellitus with ketoacidosis
- 8 Type II diabetes mellitus with ketoacidotic coma
- 9 Type II diabetes mellitus with mononeuropathy
- 10 Type II diabetes mellitus with mononeuropathy
- 11 Type II diabetes mellitus with multiple complications
- 12 Type II diabetes mellitus with multiple complications
- 13 Type II diabetes mellitus with nephropathy
- 14 Type II diabetes mellitus with nephropathy
- 15 Type II diabetes mellitus with neurological complications
- 16 Type II diabetes mellitus with neurological complications
- 17 Type II diabetes mellitus with neurological complications
- 18 Type II diabetes mellitus with neuropathic arthropathy
- 19 Type II diabetes mellitus with neuropathic arthropathy
- 20 Type II diabetes mellitus with ophthalmic complications
- 21 Type II diabetes mellitus with ophthalmic complications
- 22 Type II diabetes mellitus with ophthalmic complications
- 23 Type II diabetes mellitus with peripheral angiopathy
- 24 Type II diabetes mellitus with peripheral angiopathy
- 25 Type II diabetes mellitus with persistent microalbuminuria
- 26 Type II diabetes mellitus with persistent proteinuria
- 27 Type II diabetes mellitus with polyneuropathy
- 28 Type II diabetes mellitus with polyneuropathy
- 29 Type II diabetes mellitus with renal complications
- 30 Type II diabetes mellitus with renal complications
- 31 Type II diabetes mellitus with retinopathy
- 32 Type II diabetes mellitus with retinopathy
- 33 Type II diabetes mellitus with ulcer
- 34 Type II diabetes mellitus with ulcer
- 35 Type II diabetes mellitus without complication
- 36 Type II diabetes mellitus without complication
- 37 Type II diabetic dietary review
- 38 Diabetes mellitus autosomal dominant type 2
- 39
- 40
- 41
- 42
- 43
- 44
- 45
- 46
- 47
- 48
- 49
- 50
- 51
- 52
- 53
- 54
- 55
- 56
- 57
- 58
- 59
- 60

1  
2  
3  
4  
5  
6  
7  
8  
9  
10  
11  
12  
13  
14  
15  
16  
17  
18  
19  
20  
21  
22  
23  
24  
25  
26  
27  
28  
29  
30  
31  
32  
33  
34  
35  
36  
37  
38  
39  
40  
41  
42  
43  
44  
45  
46  
47  
48  
49  
50  
51  
52  
53  
54  
55  
56  
57  
58  
59  
60

For peer review only

1  
2  
3  
4  
5  
6  
7  
8  
9  
10  
11  
12  
13  
14  
15  
16  
17  
18  
19  
20  
21  
22  
23  
24  
25  
26  
27  
28  
29  
30  
31  
32  
33  
34  
35  
36  
37  
38  
39  
40  
41  
42  
43  
44  
45  
46  
47  
48  
49  
50  
51  
52  
53  
54  
55  
56  
57  
58  
59  
60

itus

For peer review only

|    |             |
|----|-------------|
| 1  |             |
| 2  | ICD-10 code |
| 3  | E27.1       |
| 4  | E27.2       |
| 5  | E27.3       |
| 6  | E27.4       |
| 7  | E10.1       |
| 8  | E10.2       |
| 9  | E10.3       |
| 10 | E10.4       |
| 11 | E10.5       |
| 12 | E10.6       |
| 13 | E10.7       |
| 14 | E10.8       |
| 15 | E10.9       |
| 16 | E11.1       |
| 17 | E11.2       |
| 18 | E11.3       |
| 19 | E11.4       |
| 20 | E11.5       |
| 21 | E11.6       |
| 22 | E11.7       |
| 23 | E11.8       |
| 24 | E11.9       |
| 25 | E12.1       |
| 26 | E12.2       |
| 27 | E12.3       |
| 28 | E12.4       |
| 29 | E12.5       |
| 30 | E12.6       |
| 31 | E12.7       |
| 32 | E12.8       |
| 33 | E12.9       |
| 34 | E13.1       |
| 35 | E13.2       |
| 36 | E13.3       |
| 37 | E13.4       |
| 38 | E13.5       |
| 39 | E13.6       |
| 40 | E13.7       |
| 41 | E13.8       |
| 42 | E13.9       |
| 43 | E14.1       |
| 44 | E14.2       |
| 45 | E14.3       |
| 46 | E14.4       |
| 47 | E14.5       |
| 48 | E14.6       |
| 49 | E14.7       |
| 50 | E14.8       |
| 51 | E14.9       |

For peer review only

|    |                                                                                                                  |
|----|------------------------------------------------------------------------------------------------------------------|
| 1  |                                                                                                                  |
| 2  | Term                                                                                                             |
| 3  | Primary adrenocortical insufficiency; Addison disease; Autoimmune adrenalitis                                    |
| 4  | Addisonian crisis; Adrenal crisis; Adrenocortical crisis                                                         |
| 5  | Drug-induced adrenocortical insufficiency                                                                        |
| 6  | Other and unspecified adrenocortical insufficiency; Adrenal haemorrhage/infarction; Adrenocortical insufficiency |
| 7  |                                                                                                                  |
| 8  | Type 1 diabetes mellitus with coma                                                                               |
| 9  | Type 1 diabetes mellitus with ketoacidosis                                                                       |
| 10 | Type 1 diabetes mellitus with renal complications                                                                |
| 11 | Type 1 diabetes mellitus with ophthalmic complications                                                           |
| 12 | Type 1 diabetes mellitus with neurological complications                                                         |
| 13 | Type 1 diabetes mellitus with peripheral circulatory complications                                               |
| 14 | Type 1 diabetes mellitus with other specific complications                                                       |
| 15 | Type 1 diabetes mellitus with multiple complications                                                             |
| 16 | Type 1 diabetes mellitus without complications                                                                   |
| 17 |                                                                                                                  |
| 18 | Type 2 diabetes mellitus with coma                                                                               |
| 19 | Type 2 diabetes mellitus with ketoacidosis                                                                       |
| 20 | Type 2 diabetes mellitus with renal complications                                                                |
| 21 | Type 2 diabetes mellitus with ophthalmic complications                                                           |
| 22 | Type 2 diabetes mellitus with neurological complications                                                         |
| 23 | Type 2 diabetes mellitus with peripheral circulatory complications                                               |
| 24 | Type 2 diabetes mellitus with other specific complications                                                       |
| 25 | Type 2 diabetes mellitus with multiple complications                                                             |
| 26 | Type 2 diabetes mellitus without complications                                                                   |
| 27 |                                                                                                                  |
| 28 | Malnutrition-related diabetes mellitus diabetes mellitus with coma                                               |
| 29 | Malnutrition-related diabetes mellitus diabetes mellitus with ketoacidosis                                       |
| 30 | Malnutrition-related diabetes mellitus diabetes mellitus with renal complications                                |
| 31 | Malnutrition-related diabetes mellitus diabetes mellitus with ophthalmic complications                           |
| 32 | Malnutrition-related diabetes mellitus diabetes mellitus with neurological complications                         |
| 33 | Malnutrition-related diabetes mellitus diabetes mellitus with peripheral circulatory complications               |
| 34 | Malnutrition-related diabetes mellitus diabetes mellitus with other specific complications                       |
| 35 | Malnutrition-related diabetes mellitus diabetes mellitus with multiple complications                             |
| 36 | Malnutrition-related diabetes mellitus diabetes mellitus without complications                                   |
| 37 |                                                                                                                  |
| 38 | Other specified diabetes mellitus diabetes mellitus with coma                                                    |
| 39 | Other specified diabetes mellitus diabetes mellitus with ketoacidosis                                            |
| 40 | Other specified diabetes mellitus diabetes mellitus with renal complications                                     |
| 41 | Other specified diabetes mellitus diabetes mellitus with ophthalmic complications                                |
| 42 | Other specified diabetes mellitus diabetes mellitus with neurological complications                              |
| 43 | Other specified diabetes mellitus diabetes mellitus with peripheral circulatory complications                    |
| 44 | Other specified diabetes mellitus diabetes mellitus with other specific complications                            |
| 45 | Other specified diabetes mellitus diabetes mellitus with multiple complications                                  |
| 46 | Other specified diabetes mellitus diabetes mellitus without complications                                        |
| 47 |                                                                                                                  |
| 48 | Unspecified diabetes mellitus diabetes mellitus with coma                                                        |
| 49 | Unspecified diabetes mellitus diabetes mellitus with ketoacidosis                                                |
| 50 | Unspecified diabetes mellitus diabetes mellitus with renal complications                                         |
| 51 | Unspecified diabetes mellitus diabetes mellitus with ophthalmic complications                                    |
| 52 | Unspecified diabetes mellitus diabetes mellitus with neurological complications                                  |
| 53 | Unspecified diabetes mellitus diabetes mellitus with peripheral circulatory complications                        |
| 54 | Unspecified diabetes mellitus diabetes mellitus with other specific complications                                |
| 55 | Unspecified diabetes mellitus diabetes mellitus with multiple complications                                      |
| 56 | Unspecified diabetes mellitus diabetes mellitus without complications                                            |
| 57 |                                                                                                                  |
| 58 |                                                                                                                  |
| 59 |                                                                                                                  |
| 60 |                                                                                                                  |



1  
2  
3  
4  
5  
6  
7  
8  
9  
10  
11  
12  
13  
14  
15  
16  
17  
18  
19  
20  
21  
22  
23  
24  
25  
26  
27  
28  
29  
30  
31  
32  
33  
34  
35  
36  
37  
38  
39  
40  
41  
42  
43  
44  
45  
46  
47  
48  
49  
50  
51  
52  
53  
54  
55  
56  
57  
58  
59  
60

phy

For peer review only

1  
2 Medcodeid  
3 2622348012  
4 496781000006111  
5 496791000006114  
6 1573641000006119  
7 1761401000006113  
8 1762141000006110  
9 1878421000006117  
10 1878451000006114  
11 287024011  
12 287025012  
13 288186011  
14 376571000006116  
15 825711000006111  
16 825861000006116  
17 1741791000006119  
18 389021000006114  
19 6981941000006110  
20 3904981000006111  
21 3994511000006112  
22 1816791000006117  
23 4596341000006119  
24 3289641000006110  
25 7625181000006111  
26 3951401000006118  
27 4278861000006110  
28 6861201000006112  
29 8023761000006116  
30 4090861000006111  
31 6436261000006116  
32 6602001000006116  
33 7501721000006114  
34 7671061000006119  
35 8223161000006113  
36 4090981000006113  
37 7960981000006112  
38 8024301000006115  
39 4279361000006113  
40 4280421000006113  
41 5588881000006111  
42 6054521000006111  
43 6857291000006118  
44 4091031000006116  
45 4256781000006114  
46 3541151018  
47 4091151000006110  
48 11917161000006117  
49 4279381000006115  
50 3527608016  
51 11917171000006112

For peer review only

1  
2 6436301000006113  
3 3527604019  
4 4279111000006112  
5 4279881000006114  
6 4279131000006118  
7 4090841000006112  
8 6972261000006119  
9 4091111000006114  
10 4279701000006113  
11 7631531000006118  
12 8266821000006110  
13 3994531000006118  
14 6716441000006116  
15 6716431000006114  
16 8022741000006110  
17 6436361000006114  
18 7671111000006118  
19 8694421000006118  
20 4091001000006112  
21 3344261000006112  
22 6052951000006116  
23 3533581011  
24 3916471000006110  
25 8266351000006111  
26 3916491000006111  
27 4090921000006114  
28 6436331000006117  
29 6972271000006114  
30 5009911000006118  
31 3533586018  
32 8694341000006117  
33 4279071000006116  
34 4090891000006115  
35 4091011000006110  
36 3527598017  
37 5143461000006113  
38 9325011000006117  
39 4279901000006111  
40 4279861000006116  
41 8022751000006112  
42 4327461000006117  
43 7671051000006116  
44 1814931000006110  
45 8265311000006115  
46 7522091000006110  
47 11989691000006113  
48 825841000006115  
49 825791000006118  
50 389101000006117  
51 1761381000006113  
52  
53  
54  
55  
56  
57  
58  
59  
60

For peer review only

1  
2 458431000033114  
3 8023751000006118  
4 5084731000006113  
5 4091121000006118  
6 4090791000006114  
7 3541148013  
8 4090911000006118  
9 7791061000006117  
10 317670010  
11 4091081000006115  
12 4279031000006119  
13 5650951000006113  
14 7796951000006110  
15 5009921000006114  
16 7796961000006112  
17 4280491000006110  
18 7326211000006113  
19 4279321000006119  
20 4091041000006114  
21 8694361000006118  
22 6972251000006116  
23 4297871000006114  
24 7961001000006111  
25 8105711000006115  
26 6607631000006119  
27 6671541000006112  
28 6723191000006119  
29 3541143016  
30 6436351000006112  
31 287032015  
32 8342711000006110  
33 3904971000006113  
34 287031010  
35 389111000006119  
36 288174013  
37 1977041000006112  
38 1878431000006119  
39 1878441000006112  
40 1761311000006118  
41 1762131000006117  
42 1762151000006112  
43 825881000006114  
44 825891000006112  
45 4090811000006113  
46 5004491000006116  
47 3082081000006114  
48 4085611000006119  
49 4279211000006118  
50 4091091000006117  
51 6054511000006115  
52  
53  
54  
55  
56  
57  
58  
59  
60

For peer review only

1  
2 5650961000006110  
3 4091171000006117  
4 4327411000006115  
5 4279151000006113  
6 8338681000006110  
7 4297881000006112  
8 3785181000006115  
9 389001000006116  
10 2376041000000113  
11 365853018  
12 459601018  
13 4256461000006111  
14 6436271000006111  
15 7671071000006114  
16 3533587010  
17 4742831000006112  
18 8190391000006119  
19 4085591000006113  
20 1814921000006112  
21 288177018  
22 288182013  
23 1761351000006117  
24 4279921000006118  
25 906841000006112  
26 854381000006118  
27 6436281000006114  
28 4280411000006117  
29 6436371000006119  
30 6857301000006117  
31 6671551000006114  
32 8265981000006111  
33 6436291000006112  
34 2802031000006116  
35 4090881000006118  
36 4279741000006110  
37 4256481000006118  
38 4279721000006115  
39 7671121000006114  
40 6723201000006116  
41 4091131000006115  
42 2802051000006111  
43 8024291000006116  
44 7266641000006112  
45 6436241000006115  
46 5084691000006117  
47 7333141000006111  
48 4090781000006111  
49 4279841000006115  
50 4279821000006110  
51 2963081000006116

For peer review only

1  
2 4280431000006111  
3 3533591017  
4 7796921000006118  
5 1815001000006119  
6 287027016  
7  
8 825731000006117  
9 388991000006116  
10 288178011  
11 288190013  
12  
13 288191012  
14 1761361000006115  
15 908851000006113  
16 257855012  
17 4279291000006111  
18 6280601000006113  
19  
20 7671101000006116  
21 3289651000006112  
22 4091051000006111  
23 5004511000006110  
24 4298901000006113  
25  
26 389011000006118  
27 4090971000006110  
28 4090941000006119  
29 3541141019  
30  
31 4090951000006117  
32 4279781000006116  
33 9186431000006114  
34 6861211000006110  
35 5084711000006119  
36 3082071000006111  
37  
38 4278881000006117  
39 3527596018  
40 4279171000006115  
41 4090831000006119  
42 12626771000006119  
43  
44 4091071000006118  
45 6052971000006114  
46 3528269015  
47 4279801000006117  
48 8694391000006114  
49  
50 4091161000006112  
51 4278971000006114  
52 1814951000006115  
53 2168331000000117  
54 2229631000000112  
55  
56 12031271000006114  
57 1074341000006113  
58 4279341000006114  
59 5009891000006115  
60 11777201000006114

For peer review only

1 7796991000006116  
2 459603015  
3 129081000000115  
4 152322017  
5 829181000006115  
6 7711131000006114  
7 6981961000006114  
8 3515791000006119  
9 4596351000006117  
10 3527607014  
11 3527597010  
12 7705061000006116  
13 7701991000006114  
14 3344251000006110  
15 4090871000006116  
16 4279751000006112  
17 7702801000006118  
18 7708531000006113  
19 4279911000006114  
20 7706051000006111  
21 7708771000006117  
22 7704681000006118  
23 8265821000006115  
24 7702661000006118  
25 7705031000006113  
26 3528268011  
27 2802021000006119  
28 7706061000006113  
29 4278851000006113  
30 7702701000006114  
31 7705441000006114  
32 7704671000006116  
33 7704731000006111  
34 7708731000006115  
35 7960991000006110  
36 7296281000006118  
37 4298821000006112  
38 3533582016  
39 4278961000006119  
40 6671571000006116  
41 7658881000006114  
42 8339341000006117  
43 7333161000006110  
44 7702401000006116  
45 7796971000006117  
46 7960971000006114  
47 7705211000006114  
48 7708371000006116  
49 7713771000006114  
50 7326221000006117  
51  
52  
53  
54  
55  
56  
57  
58  
59  
60

For peer review only

1  
2 3533585019  
3 4279351000006111  
4 4279891000006112  
5 4279121000006116  
6 6671561000006111  
7  
8 7298661000006113  
9 7705431000006116  
10 7658801000006117  
11 7701961000006118  
12  
13 7833241000006116  
14 4091141000006113  
15 7705291000006116  
16 6273011000006115  
17 7702101000006110  
18  
19 8024311000006117  
20 6857331000006113  
21 6601991000006118  
22 4279731000006117  
23 7326231000006119  
24  
25 7704641000006112  
26 7704191000006114  
27 7658891000006112  
28 7705461000006113  
29 4280481000006112  
30 7294881000006114  
31 7704631000006119  
32  
33 3541159016  
34 4279281000006113  
35 5004501000006112  
36 7705271000006117  
37  
38 6436341000006110  
39 7658911000006114  
40 7702471000006110  
41 7705451000006111  
42  
43 3527593014  
44 3785171000006118  
45 6861251000006111  
46 7631511000006112  
47  
48 7671131000006112  
49 7796931000006115  
50 4279831000006113  
51 5073771000006119  
52 3156721000006114  
53 4256451000006114  
54 7702671000006113  
55  
56 8298021000006115  
57 8334851000006112  
58 3994521000006116  
59 5419561000006118  
60 7708591000006112

For peer review only



1 7708581000006114  
2 7708301000006110  
3 3916501000006115  
4 4279791000006118  
5 6272981000006117  
6 7625191000006114  
7 7658791000006118  
8 7671081000006112  
9 4256471000006116  
10 4278871000006115  
11 7707951000006114  
12 7710861000006118  
13 7705281000006119  
14 4090801000006110  
15 4279691000006113  
16 5084741000006115  
17 5650971000006115  
18 264371011  
19 825721000006115  
20 829221000006112  
21 1907831000006117  
22 1907861000006114  
23 4279161000006110  
24 5009881000006118  
25 4332401000006117  
26 7708721000006118  
27 7704691000006115  
28 7705421000006119  
29 7708601000006116  
30 7704721000006113  
31 7708491000006113  
32 7266651000006114  
33 7702111000006113  
34 4279331000006116  
35 7702681000006111  
36 6272961000006110  
37 6054531000006114  
38 4279371000006118  
39 7705301000006115  
40 4279851000006118  
41 4279021000006117  
42 7698531000006117  
43 7702791000006119  
44 7705201000006111  
45 7713781000006112  
46 7787821000006113  
47 5588871000006113  
48 4742841000006119  
49 287020019  
50 287021015

For peer review only

1  
2 2302501000000114  
3 4090931000006112  
4 4280401000006115  
5 5004481000006119  
6 6592361000006110  
7 6857341000006115  
8 7704931000006113  
9 7796981000006119  
10 4091061000006113  
11 4279871000006111  
12 6716421000006111  
13 7787831000006111  
14 7712061000006114  
15 7708291000006114  
16 7791051000006119  
17 7705261000006112  
18 4279201000006116  
19 7658831000006113  
20 4280441000006118  
21 3515863011  
22 6436381000006116  
23 7702381000006116  
24 4279061000006111  
25 7712021000006115  
26 7707941000006112  
27 7702691000006114  
28 4091181000006119  
29 3541157019  
30 3533589013  
31 4332361000006110  
32 7708511000006119  
33 7705001000006117  
34 7708381000006118  
35 7710981000006116  
36 7701771000006111  
37 5084721000006110  
38 6052981000006112  
39 6716411000006115  
40 7719941000006118  
41 5009901000006116  
42 5084681000006115  
43 7702121000006117  
44 7708561000006116  
45 4332411000006119  
46 4742821000006114  
47 1878411000006113  
48 1121631000000110  
49 603931000000114  
50 7501731000006112  
51 143288017

For peer review only

1 765886100006116  
2 770209100006116  
3 770495100006118  
4 822315100006111  
5 932500100006115  
6 643625100006118  
7 3514144017  
8 728950100006117  
9 802273100006117  
10 643631100006111  
11 729448100006112  
12 508470100006117  
13 715541100006113  
14 751159100006117  
15 409085100006114  
16 433238100006117  
17 686124100006114  
18 770496100006116  
19 765885100006118  
20 770242100006114  
21 730854100006116  
22 771088100006111  
23 287029018  
24 82587100006111  
25 627300100006118  
26 409099100006111  
27 728680100006113  
28 770504100006115  
29 771039100006119  
30 729484100006115  
31 765884100006115  
32 427977100006119  
33 769852100006115  
34 765881100006119  
35 672318100006117  
36 826597100006113  
37 770517100006112  
38 408560100006117  
39 287014015  
40 783327100006112  
41 765882100006110  
42 765894100006113  
43 287022010  
44 288185010  
45 1245674100006113  
46 420080100006118  
47 409090100006116  
48 288173019  
49 770486100006112  
50 192421100006112

For peer review only

1  
2 7294691000006113  
3 7631521000006116  
4 6280611000006111  
5 7260251000006113  
6 7704941000006115  
7 4091101000006111  
8 7704181000006111  
9 7702131000006119  
10 7705051000006118  
11 8105701000006118  
12 4327441000006116  
13 7658871000006111  
14 3951391000006115  
15 7294851000006118  
16 3010191000006111  
17 4279711000006111  
18 4279141000006111  
19 7328811000006111  
20 7708571000006111  
21 8266811000006119  
22 7704711000006117  
23 4279101000006114  
24 11887321000006116  
25 7333151000006113  
26 7702651000006115  
27 7702371000006119  
28 3541154014  
29 7813131000006113  
30 7710381000006117  
31 4279311000006110  
32 7708501000006117  
33 7658921000006118  
34 3527603013  
35 4256771000006111  
36 4327391000006115  
37 5143451000006111  
38 3289661000006114  
39 4332371000006115  
40 7702141000006112  
41 7704991000006112  
42 4200811000006115  
43 4327451000006119  
44 3951411000006115  
45 3541153015  
46 7708541000006115  
47 8266341000006114  
48 1907841000006110  
49 4297891000006110  
50 7294491000006110  
51 3082061000006116  
52  
53  
54  
55  
56  
57  
58  
59  
60

For peer review only

1 7307131000006118  
2 7710871000006113  
3 7713761000006119  
4 7708761000006112  
5 7704971000006111  
6 5009931000006112  
7 7625201000006112  
8 7658931000006115  
9 7704701000006115  
10 7484811000006117  
11 7667371000006110  
12 4332391000006119  
13 4090961000006115  
14 4063961000006110  
15 11989701000006113  
16 7294871000006111  
17 7704981000006114  
18 7708311000006113  
19 1121571000000111  
20 287012016  
21 7658901000006111  
22 3533590016  
23 7708521000006110  
24 4091021000006119  
25 5084751000006118  
26 12031261000006119  
27 7796941000006113  
28 4090821000006117  
29 4279811000006119  
30 7704201000006112  
31 7708551000006118  
32 1715721000006111  
33 1812841000006118  
34 1907851000006112  
35 337231000006117  
36 264371011  
37 264418012  
38 3515761000006110  
39 3515801000006118  
40 3515811000006115  
41 474391000006110  
42 474401000006112  
43 6955711000006116  
44 6960951000006115  
45 6973421000006116  
46 6973441000006111  
47 6975941000006117  
48 6981921000006115  
49 825881000006114  
50 825891000006112

For peer review only

1  
2 879271000006114  
3 906841000006112  
4 908851000006113  
5 925451000006113  
6 925771000006110  
7  
8 103777013  
9 117168016  
10 270232016  
11 270616014  
12 272325018  
13 272389014  
14 324973015  
15 324974014  
16 324975010  
17 348547019  
18 348550016  
19 354610013  
20 354613010  
21 354616019  
22 354621016  
23 354628010  
24 413415016  
25 474471011  
26 855601000006117  
27 864761000006115  
28 988961000006115  
29 1711491000006119  
30 1711511000006113  
31 2189151000000117  
32 2191221000000118  
33 2197961000000113  
34 1620531000006113  
35 270768010  
36 270777015  
37 272326017  
38 272327014  
39 31211000006119  
40 177251000006119  
41 225661000006111  
42 380061000000118  
43 478131000006115  
44 1905531000006112  
45 859491000006112  
46 900121000006113  
47 1227663018  
48 3527364013  
49 3647071000006110  
50 5039311000006114  
51 5096171000006118  
52 4542501000006119

For peer review only

1 3532180010  
2  
3 4663311000006116  
4 2786011000006112  
5 5340221000006117  
6 4669451000006113  
7 3647061000006115  
8 12458801000006116  
9 4542461000006119  
10 4542691000006113  
11 3022121000006117  
12 7688001000006116  
13 4668981000006117  
14 2786021000006116  
15 3647051000006117  
16 4663811000006112  
17 3930661000006110  
18 4410641000006115  
19 4668961000006110  
20 7104131000006119  
21 5039331000006115  
22 2786001000006114  
23 4661791000006112  
24 4663791000006113  
25 864951000006119  
26 2560511000006119  
27 3786771000006114  
28 7237331000006116  
29 7237321000006119  
30 7316561000006118  
31 2618391000006114  
32 9935651000006116  
33 7279701000006119  
34 3346301000006113  
35 6948351000006111  
36 7838631000006116  
37 8030371000006119  
38 8453111000006110  
39 11910651000006112  
40 3653831000006114  
41 5161091000006119  
42 5096231000006110  
43 7237731000006117  
44 7139341000006119  
45 7254711000006117  
46 7985891000006113  
47 2666681000006118  
48 5087211000006119  
49 7791461000006114  
50 5057551000006110  
51 7351231000006114  
52  
53  
54  
55  
56  
57  
58  
59  
60

For peer review only

1  
2 2641011000006119  
3 2641021000006110  
4 7766401000006118  
5 5039351000006110  
6 6018741000006111  
7 7385581000006116  
8 3636952011  
9 7710041000006114  
10 7475631000006115  
11 7986241000006112  
12 7150611000006118  
13 7566431000006113  
14 8335521000006117  
15 7791471000006119  
16 8453081000006116  
17 7100591000006115  
18 7710031000006116  
19 5039341000006113  
20 5157601000006116  
21 3534658012  
22 5039371000006117  
23 7170221000006110  
24 7838621000006119  
25 7566411000006119  
26 8115451000006112  
27 2868911000006114  
28 3598901000006118  
29 3786781000006112  
30 5959291000006115  
31 7383621000006115  
32 6932441000006115  
33 7507901000006114  
34 8268201000006117  
35 3527360016  
36 3033691000006115  
37 3670311000006119  
38 3915911000006117  
39 5096031000006117  
40 7785581000006115  
41 7507891000006110  
42 7838611000006110  
43 7566391000006119  
44 2949531000006115  
45 6948341000006114  
46 7189591000006110  
47 8325471000006118  
48 12458821000006114  
49 8117811000006119  
50 8348931000006116  
51 2447021000000110  
52  
53  
54  
55  
56  
57  
58  
59  
60

For peer review only



1 5087221000006110  
2 5057581000006119  
3 5096241000006117  
4 7103511000006119  
5 7184551000006117  
6 2660021000006113  
7 5039361000006112  
8 5096051000006112  
9 3527362012  
10 8453711000006114  
11 12019461000006111  
12 7133421000006117  
13 3534651018  
14 4218231000006113  
15 4745181000006113  
16 5057571000006117  
17 7150631000006112  
18 7791441000006110  
19 8293001000006116  
20 7080931000006116  
21 7148541000006115  
22 2666671000006116  
23 3653841000006116  
24 90511000006115  
25 1549841000006116  
26 460649019  
27 461518012  
28 7986201000006110  
29 7752391000006113  
30 4323211000006112  
31 8325851000006114  
32 4319871000006111  
33 8325771000006113  
34 2868901000006111  
35 5161121000006115  
36 2660011000006117  
37 12031651000006118  
38 8284621000006118  
39 3825411000006114  
40 7475621000006118  
41 8450901000006118  
42 6718281000006112  
43 3973131000006117  
44 4779991000006112  
45 7714921000006112  
46 7181301000006112  
47 5057561000006112  
48 5161131000006117  
49 3825401000006111  
50 5980831000006116

For peer review only

1  
2 7385571000006119  
3 7298951000006115  
4 8313221000006113  
5 8325881000006118  
6 3455171000006118  
7  
8 460955014  
9 4663831000006118  
10 4661761000006116  
11 7688541000006114  
12 460645013  
13  
14 754061000006111  
15 460643018  
16 1227661016  
17 384481000006118  
18 42151000006116  
19  
20 270234015  
21 270618010  
22 1713291000006119  
23 1713331000006114  
24  
25 2676200013  
26 354623018  
27 354627017  
28 422992018  
29 324971018  
30  
31 270615013  
32 501594013  
33 7150641000006119  
34 8321131000006112  
35 7767241000006119  
36 7786611000006116  
37  
38 5161291000006110  
39 5059341000006114  
40 7167121000006113  
41 7212371000006110  
42 7167141000006118  
43 7190521000006119  
44 7688081000006113  
45 5056471000006118  
46 11910741000006116  
47  
48 380101000000116  
49 822591000006117  
50 6932431000006113  
51 8321141000006119  
52 7613121000006116  
53 12019471000006116  
54 6024591000006114  
55 5094171000006114  
56 7150621000006114  
57 8327141000006110  
58  
59 7351241000006116  
60

For peer review only

1 5340201000006110  
2 3534653015  
3 933321000006111  
4 5096191000006117  
5 4410651000006118  
6 4663841000006111  
7 3023061000006115  
8 3023081000006113  
9 5486891000006118  
10 460650019  
11 42161000006119  
12 268099017  
13 268100013  
14 270767017  
15 2209021000000112  
16 2234621000000111  
17 7766381000006118  
18 354612017  
19 270621012  
20 30458014  
21 2160027017  
22 403103015  
23 7484221000006112  
24 3973121000006115  
25 5161281000006112  
26 7150601000006116  
27 4319661000006117  
28 6585661000006112  
29 7767231000006112  
30 362091000000110  
31 460651015  
32 3636384014  
33 2890701000006112  
34 8325791000006114  
35 6933861000006111  
36 4319821000006110  
37 6316361000006112  
38 7167181000006112  
39 5053751000006110  
40 7566421000006110  
41 7767221000006114  
42 7565141000006116  
43 8348921000006119  
44 7167131000006111  
45 7569841000006114  
46 7238481000006111  
47 7710051000006111  
48 5599451000006111  
49 7385561000006114  
50 4661751000006118

For peer review only

1  
2 4668951000006113  
3 4669011000006116  
4 7080381000006116  
5 6933851000006114  
6 4668971000006115  
7  
8 3485411000006113  
9 3022131000006119  
10 424791000006110  
11 500371000006119  
12 500401000006116  
13 1550021000006110  
14 324977019  
15 55971000006117  
16 90461000006118  
17 270233014  
18 2209101000000119  
19 2234541000000115  
20 906351000006116  
21 272320011  
22 354617011  
23 8335251000006112  
24 2560521000006110  
25 5096271000006113  
26 7168651000006111  
27 7171231000006119  
28 8284921000006111  
29 7279711000006116  
30 7985971000006118  
31 5647621000006110  
32 177341000006111  
33 7791451000006112  
34 8115511000006112  
35 8325761000006118  
36 8325871000006116  
37 5096281000006111  
38 3455181000006115  
39 8325481000006115  
40 8451601000006117  
41 5538541000006110  
42 12458511000006115  
43 5647611000006119  
44 7254721000006113  
45 460644012  
46 4323341000006116  
47 90471000006113  
48 372621000000114  
49 7496071000006114  
50 7139351000006117  
51 7214301000006113  
52 12719481000006116

For peer review only

1 4542701000006113  
2 3647031000006112  
3 5043991000006117  
4 4663821000006116  
5 5043981000006115  
6 4669051000006115  
7 8258171000006110  
8 3022141000006112  
9 7688041000006119  
10 3022111000006113  
11 7091541000006113  
12 478111000006114  
13 818821000006110  
14 376141000000113  
15 90421000006112  
16 2198001000000111  
17 2198141000000110  
18 1800881000000119  
19 1709421000006118  
20 864281000006116  
21 225671000006116  
22 2160021016  
23 73655011  
24 270612011  
25 270614012  
26 270766014  
27 324970017  
28 324976011  
29 353974015  
30 354624012  
31 354631011  
32 3790671000006119  
33 2626431000006112  
34 7090481000006112  
35 12031641000006115  
36 5980821000006119  
37 7132471000006114  
38 7766371000006116  
39 11909781000006115  
40 11913051000006114  
41 2937111000006111  
42 3915921000006113  
43 7238471000006113  
44 8090361000006115  
45 5593651000006110  
46 3516351000006115  
47 7791431000006117  
48 8325861000006111  
49 3737491000006113  
50 8325781000006111  
51  
52  
53  
54  
55  
56  
57  
58  
59  
60

For peer review only

1 7209391000006119  
2 3534659016  
3 2743241000000110  
4 8325891000006115  
5 5161081000006117  
6 3260851000006117  
7 11913041000006112  
8 8335261000006114  
9 7133411000006113  
10 7348311000006117  
11 7766391000006115  
12 7080921000006119  
13 5044001000006114  
14 5157591000006112  
15 7569831000006116  
16 7932051000006112  
17 3292751000006114  
18 12719251000006111  
19 90611000006119  
20 399381000000115  
21 3022151000006114  
22 3515071000006117  
23 4663371000006113  
24 3647021000006114  
25 8325571000006119  
26 3023071000006110  
27 3532181014  
28 5096211000006116  
29 4661781000006114  
30 7104121000006117  
31 739931000006118  
32 270617017  
33 270770018  
34 270776012  
35 270778013  
36 1834341000006111  
37 861571000006118  
38 366671000000118  
39 282927013  
40 354615015  
41 354618018  
42 354619014  
43 7212381000006113  
44 8293011000006118  
45 8321121000006114  
46 7986531000006116  
47 5087201000006117  
48 270769019  
49 4542541000006117  
50 251924010

For peer review only

1  
2 4542681000006110  
3 251930010  
4 251923016  
5 4542521000006112  
6 251929017  
7  
8 4542661000006117  
9 2674490015  
10 2674491016  
11 8047851000006119  
12 8294221000006119  
13 5611161000006112  
14 5063131000006112  
15 5063121000006114  
16 361931000000119  
17 491071000000110  
18 7504171000006112  
19 6240891000006113  
20 8087441000006110  
21 7644221000006118  
22 7644211000006114  
23 3448711000006119  
24 7265981000006117  
25 5063031000006111  
26 5063081000006112  
27 5063041000006118  
28 5065771000006112  
29 2878601000006113  
30 3454841000006117  
31 5065791000006113  
32 5065801000006114  
33 5063101000006116  
34 5063051000006116  
35 2674363011  
36 2674539019  
37 746211000000116  
38 12759381000006119  
39 8038051000006113  
40 277293014  
41 2674362018  
42 12725251000006119  
43 277294015  
44 386791000000112  
45 365791000000118  
46 2674322017  
47 277291011  
48 380521000000119  
49 7046211000006111  
50 500101000006110  
51 5611121000006118  
52 415107013

For peer review only

1  
2 260879014  
3 289874016  
4 289974015  
5 289980011  
6 312137011  
7 344818012  
8 344819016  
9 344820010  
10 457317011  
11 474077018  
12 1216346016  
13 1231541019  
14 2871720012  
15 139571000006117  
16 306971000006117  
17 313001000006116  
18 313271000006116  
19 313381000006111  
20 313391000006114  
21 315461000006113  
22 316711000006113  
23 458201000006115  
24 683191000006119  
25 695561000006118  
26 880801000006116  
27 907281000006117  
28 1870401000006113  
29 2999011000006111  
30 3019771000006115  
31 3043491000006119  
32 3109051000006115  
33 3408441000006115  
34 3408461000006116  
35 3408471000006111  
36 3408501000006116  
37 4172921000006112  
38 4172951000006115  
39 4173671000006112  
40 4417331000006119  
41 5601561000006117  
42 5601571000006112  
43 5648201000006119  
44 5701111000006119  
45 5701131000006113  
46 5701141000006115  
47 5701151000006118  
48 6623111000006119  
49 6843711000006111  
50 6860401000006118  
51 6870291000006119

For peer review only



1  
2 7057421000006116  
3 7057441000006111  
4 7236901000006114  
5 7236911000006112  
6 7248451000006116  
7  
8 8037771000006119  
9 474077018  
10 306971000006117  
11 4417331000006119  
12  
13 201652012  
14 289875015  
15 289876019  
16 289880012  
17 289881011  
18 289884015  
19 289888017  
20 289888017  
21 289889013  
22 292005016  
23 292006015  
24 292009010  
25 292010017  
26 292028015  
27 292031019  
28 292177013  
29 414008012  
30 414151014  
31 414160018  
32 414248013  
33 509741017  
34 1216015014  
35 1216360019  
36 1216396015  
37 202801000006110  
38 306931000006115  
39 311311000006115  
40 311511000006114  
41 314521000006116  
42 555131000006118  
43 731621000006113  
44 880821000006114  
45 880831000006112  
46 880841000006119  
47 2168661000000116  
48 2168671000000111  
49 2168681000000113  
50 2233381000000115  
51 2233421000000112  
52 2233461000000116  
53 3019871000006112  
54 3020041000006112  
55  
56  
57  
58  
59  
60

For peer review only

1  
2 3327891000006112  
3 3327901000006111  
4 3327911000006114  
5 3327921000006118  
6 3327961000006112  
7  
8 3327971000006117  
9 3992621000006112  
10 3992631000006110  
11 4009731000006118  
12 4009741000006111  
13  
14 4416411000006118  
15 4416551000006116  
16 4416591000006110  
17 4416681000006111  
18 4416691000006114  
19  
20 4420051000006115  
21 4420351000006118  
22 4753241000006113  
23 5599791000006114  
24 5599801000006110  
25  
26 5600851000006111  
27 5600941000006116  
28 5601231000006111  
29 5601261000006119  
30 5601291000006110  
31 5601361000006112  
32 5601401000006119  
33 5601461000006118  
34  
35 6347711000006119  
36 6693111000006110  
37  
38 7048071000006112  
39 7048121000006112  
40 7118591000006115  
41 7527551000006112  
42 7716791000006117  
43 7849031000006117  
44 7868981000006116  
45 7995641000006118  
46 8020031000006118  
47  
48 13660051000006110  
49 13937971000006110  
50 14075341000006119  
51  
52 289813015  
53 292170010  
54 414257019  
55 414278016  
56 451429010  
57 2901912012  
58 3517129013  
59  
60 308801000006118

For peer review only

1  
2 309181000006110  
3 763421000006116  
4 763431000006118  
5 1815151000006116  
6 1815161000006119  
7 1815171000006114  
8 1815181000006112  
9 1815221000006115  
10 1815231000006117  
11 1815491000006119  
12 2124491000000113  
13 2124511000000117  
14 2734791000000113  
15 3150381000006111  
16 3393051000006113  
17 3395251000006115  
18 4172561000006112  
19 4172591000006116  
20 4172601000006112  
21 5602251000006111  
22 5602351000006117  
23 5602371000006110  
24 5602571000006115  
25 5975501000006113  
26 6693411000006115  
27 6940861000006118  
28 6940871000006113  
29 7353041000006113  
30 7358451000006113  
31 7361211000006114  
32 7369661000006114  
33 7566531000006112  
34 7569011000006116  
35 13686181000006118  
36 287021015  
37 3081251000006115  
38 3515781000006117  
39  
40  
41  
42  
43  
44  
45  
46  
47  
48  
49  
50  
51  
52  
53  
54  
55  
56  
57  
58  
59  
60

For peer review only

1  
2 Term  
3 HIV disease resulting in wasting syndrome  
4 Asymptomatic HIV Infection - First Presentation  
5 Asymptomatic HIV Infection - Subsequent Presentation  
6 H/O: HIV  
7  
8 [SHHAPT] Attendance for HIV related care  
9 [SHHAPT] New HIV diagnosis - acute - diagnosed prev. elsewhere  
10 HIV monitoring telephone invite  
11 HIV monitoring third telephone invitation  
12 HIV disease resulting in cytomegaloviral disease  
13 HIV disease resulting in candidiasis  
14 [X]HIV disease resulting in unspecified malignant neoplasm  
15 [X]Dementia in human immunodef virus [HIV] disease  
16 HIV dis reslt/oth mal neopl/lymph,h'matopoetc+reltd tissu  
17 HIV disease resulting/unspcf infectious+parasitic disease  
18 HIV positive general health check service declined  
19 [X]HIV disease resulting in multiple infections  
20 HIV - Human immunodeficiency virus infection wasting syndrome  
21 HIV - Human immunodeficiency virus infection  
22 Asymptomatic HIV infection  
23 HIV disease complicating pregnancy childbirth puerperium  
24 Human immunodeficiency virus (HIV) positive  
25 HIV infection with infectious mononucleosis-like syndrome  
26 HIV 2 RNA  
27 HIV-1  
28 HIV 2 gp125 antibody  
29 Leucoplakia of tongue associated with HIV disease  
30 Human immunodeficiency virus (HIV) infection category B2  
31 HIV CDC category B1  
32 HIV WHO class  
33 HIV - Human immunodeficiency virus encephalitis  
34 Pulmonary arterial hypertension associated with HIV infection  
35 Immunoglobulin G antibody to HIV 1  
36 People with HIV or AIDS  
37 Human immunodeficiency virus (HIV) Centers for Disease Control and Prevention (CDC) category C2 (AIDS)  
38 Invasive carcinoma of uterine cervix co-occurrent with HIV (human immunodeficiency virus) infection  
39 Symptomatic HIV (human immunodeficiency virus) I infection  
40 HIV 1 p66 antibody  
41 HIV-1 antigen  
42 HIV - Congenital human immunodeficiency virus positive status syndrome  
43 Human immunodeficiency virus (HIV) viral load  
44 Hairy leucoplakia of tongue associated with HIV disease  
45 HIV WHO class I  
46 HIV-2 p41  
47 WHO 2007 HIV infection clinical stage 3 and tuberculosis  
48 HIV WHO class IV (AIDS)  
49 [X] HIV disease resulting in haematological and immunological abnormalities, not elsewhere classified  
50 HIV 1 p55 antibody  
51 WHO 2007 HIV infection clinical stage 4  
52 [X]HIV disease resulting in multiple diseases classified elsewhere

1 Human immunodeficiency virus (HIV) World Health Organisation (WHO) class  
2 WHO 2007 HIV infection clinical stage 3  
3 HIV 1 p65 antibody  
4 HIV 1 p18 antibody  
5 HIV 2 p68 antibody  
6 Human immunodeficiency virus (HIV) Centers for Disease Control and Prevention (CDC) category A3 (AIDS)  
7 HIV retinopathy  
8 HIV WHO class III  
9 HIV 1 p31 antibody  
10 Deoxyribonucleic acid of HIV 2  
11 HIV (human immunodeficiency virus) type 2 antiviral resistance measurement by RNA (ribonucleic acid) analys  
12 Asymptomatic HIV infection in pregnancy  
13 HIV infection, pediatric  
14 HIV infection, paediatric  
15 Human immunodeficiency virus (HIV) II infection category B1  
16 Human immunodeficiency virus (HIV) World Health Organization (WHO) class finding  
17 Immunoglobulin G antibody to HIV 2  
18 Hivid 375microgram tablets (Roche Products Ltd) 100 tablet  
19 HIV CDC category C3 (AIDS)  
20 Congenital HIV infection  
21 HIV infection with aseptic meningitis  
22 HIV infection WHO 2007 clinical stage 1 co-occurrent with malaria  
23 HIV infection with acute lymphadenitis  
24 HIV (human immunodeficiency virus) type 1 antiviral resistance measurement by RNA (ribonucleic acid) analys  
25 Human immunodeficiency virus (HIV) infection with acute lymphadenitis  
26 Human immunodeficiency virus (HIV) Centers for Disease Control and Prevention (CDC) category B3 (AIDS)  
27 Human immunodeficiency virus (HIV) Centers for Disease Control and Prevention (CDC) category finding  
28 HIV-associated retinopathy  
29 HIV - Human immunodeficiency virus neuropathy  
30 HIV infection WHO 2007 clinical stage 2 co-occurrent with malaria  
31 Hivid 750microgram tablets (Roche Products Ltd)  
32 HIV 1 p28 antibody  
33 Human immunodeficiency virus (HIV) Centers for Disease Control and Prevention (CDC) category B2  
34 Human immunodeficiency virus (HIV) Centers for Disease Control and Prevention (CDC) category C3 (AIDS)  
35 WHO 2007 HIV infection clinical stage 2  
36 HIV - Human immunodeficiency virus myopathy  
37 HIV (human immunodeficiency virus) in childbirth  
38 HIV 1 gp34 antibody  
39 HIV 1 p53 antibody  
40 Human immunodeficiency virus (HIV) II infection category B2  
41 Human immunodeficiency virus type 2 (HIV-2) antibody  
42 HIV 1 IgG  
43 HIV disease resulting in Kaposi sarcoma  
44 Referral to community HIV (human immunodeficiency virus) nurse specialist  
45 Human immunodeficiency virus (HIV) carrier  
46 HIV disease resulting in mycobacterial infection  
47 HIV disease resulting in unspecified malignant neoplasm  
48 HIV disease resulting in multiple diseases CE  
49 [X]HIV disease resulting/other infectious+parasitic diseases  
50 [SHHAPT] New HIV diagnosis - late

1 Hivid  
2  
3 Human immunodeficiency virus (HIV) infection category B1  
4 HIV - Human immunodeficiency virus diarrhea  
5 Human immunodeficiency virus (HIV) World Health Organisation (WHO) class III  
6 Human immunodeficiency virus (HIV) Centers for Disease Control and Prevention (CDC) category A1  
7 WHO 2007 HIV infection clinical stage 2 and tuberculosis  
8 HIV CDC category B3 (AIDS)  
9  
10 HIV 2 antibody positive and HIV 1 antibody cross-reactivity  
11 [D]Laboratory evidence of human immunodeficiency virus [HIV]  
12 Human immunodeficiency virus (HIV) World Health Organization (WHO) class II  
13 HIV 1 p32 antibody  
14 HIV-related sclerosing cholangitis  
15 Proviral deoxyribonucleic acid of HIV 1  
16 Neuropathy caused by HIV - human immunodeficiency virus  
17 HIV 2 proviral DNA  
18 HIV 1 p24 antigen  
19 HIV 1 phenotyping  
20 HIV 1 p58 antibody  
21 Human immunodeficiency virus (HIV) World Health Organisation (WHO) class I  
22 Hivid 750microgram tablets (Roche Products Ltd) 100 tablet  
23 HIV-related microangiopathy of the retina  
24 HIV 1 identification  
25 Extrapulmonary TB (tuberculosis) co-occurrent with HIV (human immunodeficiency virus) infection  
26 HIV (human immunodeficiency virus) viral load by log rank  
27 HIV 1 nucleic acid detection  
28 Oral hairy leucoplakia associated with HIV disease  
29 HIV EIA test positive  
30 WHO 2007 HIV infection clinical stage 1 and tuberculosis  
31 HIV WHO class finding  
32 HIV disease resulting in lymphoid interstitial pneumonitis  
33 HIV (human immunodeficiency virus) disease resulting in haematological and immunological abnormalities  
34 HIV infection  
35 HIV disease resulting in multiple malignant neoplasms  
36 [X]HIV disease resulting/unspcf infectious+parasitic disease  
37 [X]HIV disease resulting in other bacterial infections  
38 HIV-1/HIV-2 antigen/antibody combination immunoassay positive  
39 HIV monitoring first telephone invitation  
40 HIV monitoring second telephone invitation  
41 [SHHAPT] HIV positive  
42 [SHHAPT] New HIV diagnosis - diagnosed previously elsewhere  
43 [SHHAPT] New HIV diagnosis - late - diagnosed prev. elsewhere  
44 HIV Infection With Symptoms, Not AIDS - First Presentation  
45 HIV Infection With Symptoms, Not AIDS - Subsequent Presentation  
46 HIV CDC category A2  
47 HIV - Human immunodeficiency virus leukoencephalopathy  
48 HIV2 - Human immunodeficiency virus type 2  
49 Human immunodeficiency virus (HIV) p24 antigen  
50 HIV 2 gp80 antibody  
51 Human immunodeficiency virus (HIV) World Health Organisation (WHO) class II  
52 HIV viral load

1 Human immunodeficiency virus HIV-related sclerosing cholangitis  
2 Human immunodeficiency virus (HIV) World Health Organisation (WHO) class IV (acquired immunodeficiency s  
3 HIV-1 Antibody  
4 HIV 2 p56 antibody  
5 HIV-1 (human immunodeficiency virus type 1) subtype identification  
6 Human immunodeficiency virus HIV-1 identification  
7 HIV 2 infection  
8 HIV (human immunodeficiency virus) disease resulting in haematological and immunological abnormalities  
9 HIV (human immunodeficiency virus) drug resistance test  
10 Acute HIV infection  
11 HIV (human immunodeficiency virus) viral load  
12 HIV-1 gp120  
13 Human immunodeficiency virus (HIV) World Health Organization class  
14 Anti-HIV 1 IgG  
15 HIV WHO 2007 infection clinical stage 3 co-occurrent with malaria  
16 HIV - Human immunodeficiency virus infection constitutional disease  
17 HIV (Human immunodeficiency virus) positive general health check service declined - enhanced services admir  
18 HIV p24 antigen  
19 HIV disease resulting in Pneumocystis jirovecii pneumonia  
20 [X]HIV disease resulting in other viral infections  
21 [X]HIV disease resulting in other non-Hodgkin's lymphoma  
22 [SHHAPT] New HIV diagnosis  
23 HIV 1 p15 antibody  
24 [RFC] HIV/AIDS  
25 HIV infection  
26 Human immunodeficiency virus (HIV) World Health Organization (WHO) class  
27 HIV 1 p26 antibody  
28 Human immunodeficiency virus (HIV) World Health Organisation (WHO) class finding  
29 Hairy leukoplakia of tongue associated with HIV disease  
30 Oral hairy leukoplakia associated with HIV disease  
31 HIV (human immunodeficiency virus) 1 genotype determination by RNA (ribonucleic acid) analysis  
32 Human immunodeficiency virus (HIV) World Health Organisation class  
33 HIV  
34 HIV CDC category B2  
35 HIV 1 p17 antibody  
36 HIV-1 gp160  
37 HIV 2 p24 antibody  
38 Anti-HIV 2 IgG  
39 HIV ELISA test positive  
40 Human immunodeficiency virus (HIV) World Health Organization (WHO) class III  
41 HIV - Human immunodeficiency virus  
42 Symptomatic human immunodeficiency virus (HIV) I infection  
43 Increased human immunodeficiency virus (HIV) viral load  
44 HIV CDC category  
45 HIV - Human immunodeficiency virus enteropathy  
46 HIV 1 genotyping  
47 HIV CDC category A1  
48 HIV 2 p41 antibody  
49 HIV 1 p64 antibody  
50 Serologic test for HIV-1

1 Human immunodeficiency virus (HIV) 1 antigen  
 2 HIV WHO 2007 infection clinical stage 4 co-occurrent with malaria  
 3 HIV 1 proviral DNA  
 4 [X]HIV disease resulting in other non-Hodgkin lymphoma  
 5 HIV disease resulting in multiple infections  
 6 HIV disease result/haematological+immunologic abnorms,NEC  
 7 [X]HIV dis reslt/oth mal neopl/lymph,h'matopoetc+reltd tissu  
 8 [X]HIV disease resulting in other mycoses  
 9 [X]HIV disease resulting in other specified conditions  
 10 [X]Unspecified human immunodeficiency virus [HIV] disease  
 11 [SHHAPT] New HIV diagnosis - acute  
 12 [RFC] AIDS/HIV  
 13 HIV positive  
 14 HIV 1 gp105 antibody  
 15 Finding of HIV status  
 16 HIV 2 IgG  
 17 Human immunodeficiency virus (HIV) infection with infectious mononucleosis-like syndrome  
 18 Human immunodeficiency virus (HIV) World Health Organization (WHO) class I  
 19 HIV - Human immunodeficiency virus leucoencephalopathy  
 20 Human immunodeficiency virus (HIV) 2 gp125 antibody assay  
 21 [X]HIV disease resulting in multiple diseases classified elsewhere  
 22 HIV CDC category C2 (AIDS)  
 23 HIV CDC category C1 (AIDS)  
 24 WHO 2007 HIV infection clinical stage 4 and tuberculosis  
 25 Human immunodeficiency virus (HIV) Centers for Disease Control and Prevention (CDC) category C1 (AIDS)  
 26 HIV 1 gp120 antibody  
 27 Hivid  
 28 Leukoplakia of tongue associated with HIV disease  
 29 HIV - Human immunodeficiency virus diarrhoea  
 30 HIV-2  
 31 HIV 2 gp36 antibody  
 32 WHO 2007 HIV infection clinical stage 1  
 33 HIV 2 p26 antibody  
 34 HIV CDC category A3 (AIDS)  
 35 HIV (human immunodeficiency virus) 1 antibody presence in serum  
 36 HIV WHO class II  
 37 Human immunodeficiency virus (HIV) infection with aseptic meningitis  
 38 HIV fusion inhibitor  
 39 HIV 1 gp160 antibody  
 40 Hivid 375microgram tablets (Roche Products Ltd)  
 41 Human immunodeficiency virus (HIV) World Health Organization (WHO) class IV (acquired immunodeficiency s  
 42 HIV 1 p23 antibody  
 43 HIV disease resulting in other types of non-Hodgkin lymphoma  
 44 HIV disease resulting in Burkitt lymphoma  
 45 Seen by community HIV (human immunodeficiency virus) nurse  
 46 HIVEP2 (human immunodeficiency virus type I enhancer binding protein 2) related intellectual disability  
 47 Adverse reaction to Hivid  
 48 HIV 1 p51 antibody  
 49 Neuropathy due to HIV - human immunodeficiency virus  
 50 [X]Hiv disease resulting in hematological and immunological abnormalities, not elsewhere classified



1 Proviral deoxyribonucleic acid of HIV 2  
2 HIV (human immunodeficiency virus) antibody/antigen (Duo)  
3 HIV1 (human immunodeficiency virus 1) antibody level  
4 Asymptomatic human immunodeficiency virus infection  
5 Human immunodeficiency virus with constitutional disease  
6 Burkitt's lymphoma co-occurrent with human immunodeficiency virus infection  
7 Human immunodeficiency virus infection wasting syndrome  
8 Immunodeficiency due to human immunodeficiency virus infection  
9 Human immunodeficiency virus positive  
10 World Health Organization 2007 Human immunodeficiency virus infection clinical stage 4  
11 World Health Organization 2007 Human immunodeficiency virus infection clinical stage 2  
12 Acute endocarditis co-occurrent with human immunodeficiency virus infection  
13 Neuralgia co-occurrent with human immunodeficiency virus infection  
14 Congenital human immunodeficiency virus infection  
15 Human immunodeficiency virus Centers for Disease Control and Prevention category B1  
16 Human immunodeficiency virus, type I glycoprotein 41 antibody  
17 Anemia co-occurrent with human immunodeficiency virus infection  
18 Pyrexia of unknown origin co-occurrent with human immunodeficiency virus infection  
19 Human immunodeficiency virus, type I protein 15 antibody  
20 Infectious gastroenteritis co-occurrent with human immunodeficiency virus infection  
21 Human immunodeficiency virus antibodies positive and p24 antigen positive  
22 Progressive multifocal leukoencephalopathy co-occurrent with human immunodeficiency virus infection  
23 Human immunodeficiency virus 1 ribonucleic acid measurement by nucleic acid amplification test  
24 Strongyloidiasis co-occurrent with human immunodeficiency virus infection  
25 Enlargement of liver co-occurrent with human immunodeficiency virus infection  
26 Human immunodeficiency virus fusion inhibitor  
27 Human immunodeficiency virus  
28 Disorder of central nervous system co-occurrent with human immunodeficiency virus infection  
29 Human immunodeficiency virus, type II glycoprotein 125 antibody  
30 Salmonellosis co-occurrent with human immunodeficiency virus infection  
31 Infection caused by Nocardia co-occurrent with human immunodeficiency virus infection  
32 Progressive multifocal leukoencephalopathy co-occurrent with human immunodeficiency virus infection  
33 Organic brain syndrome co-occurrent with human immunodeficiency virus infection  
34 Reactive for Human immunodeficiency virus antibody  
35 Extrapulmonary tuberculosis co-occurrent with human immunodeficiency virus infection  
36 Human immunodeficiency virus 2 glycoprotein 125 antibody  
37 Measurement of Human immunodeficiency virus 2 glycoprotein 105 antibody  
38 Human immunodeficiency virus World Health Organization 2007 stage 1 co-occurrent with malaria  
39 Human immunodeficiency virus, type I protein 23 antibody  
40 Oral hairy leucoplakia associated with human immunodeficiency virus disease  
41 Antibody to human immunodeficiency virus, type II protein 16  
42 Human immunodeficiency virus IgG avidity  
43 Human immunodeficiency virus 1 genotyping  
44 Myocarditis co-occurrent with human immunodeficiency virus infection  
45 Proviral deoxyribonucleic acid of Human immunodeficiency virus 2  
46 Invasive carcinoma of uterine cervix co-occurrent with human immunodeficiency virus infection  
47 Disorder of peripheral nervous system co-occurrent with human immunodeficiency virus infection  
48 Infection caused by Cytomegalovirus co-occurrent with human immunodeficiency virus infection  
49 Recurrent salmonella septicaemia co-occurrent with human immunodeficiency virus infection  
50 Determination of susceptibility of Human immunodeficiency virus 1 to panel of antiretroviral drugs using phen

1 Human immunodeficiency virus World Health Organization 2007 stage 2 co-occurrent with malaria  
2 Human immunodeficiency virus, type I protein 66 antibody  
3 Human immunodeficiency virus, type I glycoprotein 34 antibody  
4 Human immunodeficiency virus, type II protein 68 antibody  
5 Oral hairy leukoplakia associated with human immunodeficiency virus disease  
6 Human immunodeficiency virus 2 protein 53 antibody  
7 Bacterial pneumonia co-occurrent with human immunodeficiency virus infection  
8 Antibody to human immunodeficiency virus, type I protein 40  
9 Splenomegaly co-occurrent with human immunodeficiency virus infection  
10 Sequela of infection caused by Human immunodeficiency virus  
11 Human immunodeficiency virus World Health Organization class III  
12 Acquired haemolytic anaemia co-occurrent with human immunodeficiency virus infection  
13 Finding of human immunodeficiency virus antibody titre  
14 Candidiasis of esophagus co-occurrent with human immunodeficiency virus infection  
15 Symptomatic human immunodeficiency virus I infection  
16 Hairy leukoplakia of tongue associated with human immunodeficiency virus disease  
17 Human immunodeficiency virus encephalitis  
18 Human immunodeficiency virus, type I protein 17 antibody  
19 Human immunodeficiency virus 1 phenotyping  
20 Disorder of respiratory system co-occurrent with human immunodeficiency virus infection  
21 Disseminated infection caused by Strongyloides co-occurrent with human immunodeficiency virus infection  
22 Human immunodeficiency virus, type II protein 16 antibody  
23 Isosporiasis co-occurrent with human immunodeficiency virus infection  
24 Human immunodeficiency virus, type I protein 24 antigen  
25 Human immunodeficiency virus 2 glycoprotein 120 antibody  
26 Reticulosarcoma co-occurrent with human immunodeficiency virus infection  
27 Human immunodeficiency virus World Health Organization 2007 stage 4 co-occurrent with tuberculosis  
28 Human immunodeficiency virus, type I glycoprotein 105 antibody  
29 Human immunodeficiency virus leukoencephalopathy  
30 Visual impairment co-occurrent with human immunodeficiency virus infection  
31 Human immunodeficiency virus Centers for Disease Control and Prevention category finding  
32 Human immunodeficiency virus, type I glycoprotein 40 Ab  
33 Primary cerebral lymphoma co-occurrent with human immunodeficiency virus infection  
34 Nocardiosis co-occurrent with human immunodeficiency virus infection  
35 World Health Organization 2007 Human immunodeficiency virus infection clinical stage 1  
36 Human immunodeficiency virus II infection  
37 Leucoplakia of tongue associated with human immunodeficiency virus disease  
38 Human immunodeficiency virus 2 DNA  
39 Immunoglobulin G antibody to Human immunodeficiency virus type 2  
40 Proviral deoxyribonucleic acid of Human immunodeficiency virus 1  
41 Human immunodeficiency virus, type II protein 41 antibody  
42 Human immunodeficiency virus-associated periodontitis  
43 Human immunodeficiency virus I infection  
44 Human immunodeficiency virus, type I glycoprotein antigen 120  
45 Disorder of skin co-occurrent with human immunodeficiency virus infection  
46 Facial lipoatrophy associated with human immunodeficiency virus  
47 Human immunodeficiency virus drug resistance test  
48 Asymptomatic human immunodeficiency virus infection in pregnancy  
49 Human immunodeficiency virus antibody  
50 Dermatophytosis co-occurrent with human immunodeficiency virus infection

1 Herpes zoster infection co-occurrent with human immunodeficiency virus infection  
2 Diffuse non-Hodgkin's immunoblastic lymphoma co-occurrent with human immunodeficiency virus infection  
3 Human immunodeficiency virus infection with acute lymphadenitis  
4 Human immunodeficiency virus, type I glycoprotein 160 antibody  
5 Human immunodeficiency virus antibody titer - finding  
6 Human immunodeficiency virus 2 RNA  
7 Human immunodeficiency virus, type I protein 40 Ab  
8 Immunoglobulin G antibody to Human immunodeficiency virus type 1  
9 Human immunodeficiency virus, type 1 glycoprotein antigen 160  
10 Human immunodeficiency virus, type II glycoprotein 36 antibody  
11 Renal failure syndrome co-occurrent with human immunodeficiency virus infection  
12 Opportunistic mycosis co-occurrent with human immunodeficiency virus infection  
13 Infective arthritis co-occurrent with human immunodeficiency virus infection  
14 Human immunodeficiency virus Centers for Disease Control and Prevention category A1  
15 Human immunodeficiency virus, type I protein 31 antibody  
16 Human immunodeficiency virus diarrhea  
17 Human immunodeficiency virus-related sclerosing cholangitis  
18 Human immunodeficiency virus carrier  
19 Non-Hodgkin lymphoma associated with Human immunodeficiency virus infection  
20 Human immunodeficiency virus infection with secondary clinical infectious disease  
21 Human immunodeficiency virus infection monitoring telephone invitation  
22 Human immunodeficiency virus infection monitoring third telephone invitation  
23 Human immunodeficiency virus, type II protein 26 antibody  
24 Neuropathy due to human immunodeficiency virus  
25 Human immunodeficiency virus 1 RNA  
26 Human immunodeficiency virus antibody positive  
27 Presenile dementia co-occurrent with human immunodeficiency virus infection  
28 Demyelinating disease of central nervous system co-occurrent with human immunodeficiency virus infection  
29 Infection caused by Dermatophyte co-occurrent with human immunodeficiency virus infection  
30 Pneumocystosis co-occurrent with human immunodeficiency virus infection  
31 Coccidiosis co-occurrent with human immunodeficiency virus infection  
32 Copies of human immunodeficiency virus ribonucleic acid above reference range  
33 Heart disease co-occurrent with human immunodeficiency virus infection  
34 Human immunodeficiency virus, type I protein 51 antibody  
35 Myelitis co-occurrent with human immunodeficiency virus infection  
36 Human immunodeficiency virus antibody titre - finding  
37 Human immunodeficiency virus viral load  
38 Human immunodeficiency virus, type I protein 55 antibody  
39 Acquired hemolytic anemia co-occurrent with human immunodeficiency virus infection  
40 Human immunodeficiency virus, type I protein 53 antibody  
41 Human immunodeficiency virus, type I protein 32 antibody  
42 Reactive for human immunodeficiency virus p24 antigen  
43 Anaemia co-occurrent with human immunodeficiency virus infection  
44 Recurrent bacterial pneumonia co-occurrent with human immunodeficiency virus infection  
45 Recurrent salmonella septicemia co-occurrent with human immunodeficiency virus infection  
46 Candidiasis of upper respiratory tract co-occurrent with human immunodeficiency virus infection  
47 Congenital human immunodeficiency virus positive status syndrome  
48 Human immunodeficiency virus infection with neurological disease  
49 Human immunodeficiency virus with other clinical findings  
50 Acquired human immunodeficiency virus infection syndrome NOS

1 Human immunodeficiency virus infection monitoring invitation  
2 Human immunodeficiency virus Centers for Disease Control and Prevention category B3 (acquired immunodeficiency syndrome)  
3 Human immunodeficiency virus, type I protein 26 antibody  
4 Human immunodeficiency virus leucoencephalopathy  
5 Human immunodeficiency virus encephalopathy  
6 Hairy leucoplakia of tongue associated with human immunodeficiency virus disease  
7 Disorder of spinal cord co-occurrent with human immunodeficiency virus infection  
8 Proviral DNA of Human immunodeficiency virus 2  
9 Human immunodeficiency virus World Health Organization class I  
10 Human immunodeficiency virus, type I protein 18 antibody  
11 Pediatric human immunodeficiency virus infection  
12 Infection of upper respiratory tract caused by *Candida* co-occurrent with human immunodeficiency virus infection  
13 Disseminated atypical infection caused by *Mycobacterium* co-occurrent with human immunodeficiency virus infection  
14 Diffuse non-Hodgkin immunoblastic lymphoma co-occurrent with human immunodeficiency virus infection  
15 Human immunodeficiency virus 2 antibody positive and Human immunodeficiency virus 1 antibody cross-reactive  
16 Agranulocytosis co-occurrent with human immunodeficiency virus infection  
17 Human immunodeficiency virus, type II glycoprotein 80 antibody  
18 Human immunodeficiency virus, type II glycoprotein 140 Ab  
19 Human immunodeficiency virus 1 antigen  
20 Asymptomatic human immunodeficiency virus A2 infection  
21 Human immunodeficiency virus World Health Organization class finding  
22 Skin rash co-occurrent with human immunodeficiency virus infection  
23 Human immunodeficiency virus, type I protein 28 antibody  
24 Multidermatomal infection caused by Herpes zoster co-occurrent with human immunodeficiency virus infection  
25 Nephrotic syndrome co-occurrent with human immunodeficiency virus infection  
26 Infection caused by *Salmonella* co-occurrent with human immunodeficiency virus infection  
27 Human immunodeficiency virus World Health Organization class IV (acquired immunodeficiency syndrome)  
28 Human immunodeficiency virus World Health Organization 2007 stage 3 co-occurrent with tuberculosis  
29 Human immunodeficiency virus World Health Organization 2007 stage 3 co-occurrent with malaria  
30 Human immunodeficiency virus DNA  
31 Infection caused by herpes simplex virus co-occurrent with human immunodeficiency virus infection  
32 Aplastic anemia co-occurrent with human immunodeficiency virus infection  
33 Cytomegalovirus infection co-occurrent with human immunodeficiency virus infection  
34 Focal segmental glomerulosclerosis co-occurrent with human immunodeficiency virus infection  
35 Subacute adenoviral encephalitis co-occurrent with human immunodeficiency virus infection  
36 Human immunodeficiency virus diarrhoea  
37 Human immunodeficiency virus infection with aseptic meningitis  
38 Paediatric human immunodeficiency virus infection  
39 Immune reconstitution inflammatory syndrome caused by human immunodeficiency virus infection  
40 Human immunodeficiency virus neuropathy  
41 Human immunodeficiency virus enteropathy  
42 Disorder of eye proper co-occurrent with human immunodeficiency virus infection  
43 Infection caused by *Aspergillus* co-occurrent with human immunodeficiency virus infection  
44 Human immunodeficiency virus 1 ribonucleic acid  
45 Human immunodeficiency virus infection constitutional disease  
46 Human immunodeficiency virus monitoring admin.  
47 Human immunodeficiency virus annual review  
48 Human immunodeficiency virus viral load by log rank  
49 Pulmonary arterial hypertension associated with human immunodeficiency virus infection  
50 Human immunodeficiency virus infection

1 Anti-Human immunodeficiency virus, type II glycoprotein 140 antibody  
2 Candidiasis of oesophagus co-occurrent with human immunodeficiency virus infection  
3 Nephropathy co-occurrent with human immunodeficiency virus infection  
4 People with human immunodeficiency virus or acquired immune deficiency syndrome  
5 Human immunodeficiency virus in mother complicating childbirth  
6 Human immunodeficiency virus Centers for Disease Control and Prevention category  
7 Asymptomatic human immunodeficiency virus A1 infection  
8 Human immunodeficiency virus I glycoprotein 43 antibody  
9 Human immunodeficiency virus  
10 Human immunodeficiency virus World Health Organization class  
11 Human immunodeficiency virus 2 glycoprotein 34 antibody  
12 Human immunodeficiency virus non-pathogenic diarrhoea  
13 History of asymptomatic human immunodeficiency virus infection  
14 Human immunodeficiency virus Centers for Disease Control and Prevention category B  
15 Human immunodeficiency virus Centers for Disease Control and Prevention category A3 (acquired immunodeficiency)  
16 Human immunodeficiency virus 1 DNA  
17 Leukoplakia of tongue associated with human immunodeficiency virus disease  
18 Gastrointestinal malabsorption syndrome co-occurrent with human immunodeficiency virus infection  
19 Human immunodeficiency virus, type II glycoprotein 140 antibody  
20 Radiculitis co-occurrent with human immunodeficiency virus infection  
21 Human immunodeficiency virus 1 protein 68 antibody  
22 Infection caused by Microsporidia co-occurrent with human immunodeficiency virus infection  
23 Burkitt lymphoma co-occurrent with human immunodeficiency virus infection  
24 Human immunodeficiency virus infection with persistent generalised lymphadenopathy  
25 Finding of human immunodeficiency virus antibody titer  
26 Human immunodeficiency virus Centers for Disease Control and Prevention category C2 (acquired immunodeficiency)  
27 Human immunodeficiency virus 1 protein 24 antibody  
28 Large liver co-occurrent with human immunodeficiency virus infection  
29 Infection caused by Cryptosporidium co-occurrent with human immunodeficiency virus infection  
30 Human immunodeficiency virus 2 protein 31 antibody  
31 Antibody to human immunodeficiency virus, type II glycoprotein 140  
32 Human immunodeficiency virus, type I glycoprotein 120 antibody  
33 Human immunodeficiency virus p24 antigen positive  
34 Human immunodeficiency virus, type I protein 40 antibody  
35 Human immunodeficiency virus enzyme-linked immunosorbent assay test positive  
36 Human immunodeficiency virus 1 genotype determination by ribonucleic acid analysis  
37 Cardiomyopathy co-occurrent with human immunodeficiency virus infection  
38 Human immunodeficiency virus p24 antigen  
39 Malignant neoplastic disease co-occurrent with human immunodeficiency virus infection  
40 Parkinsonism due to human immunodeficiency virus infection  
41 Anti-Human immunodeficiency virus, type I protein 40 antibody  
42 Anti-Human immunodeficiency virus, type I glycoprotein 40 antibody  
43 Symptomatic human immunodeficiency virus infection  
44 Malignant neoplastic disease co-occurrent with human immunodeficiency virus infection  
45 [V]Asymptomatic human immunodeficiency virus infection status  
46 Acute human immunodeficiency virus seroconversion illness  
47 Human immunodeficiency virus Centers for Disease Control and Prevention category B2  
48 [X]Human immunodeficiency virus disease  
49 Candidiasis of mouth co-occurrent with human immunodeficiency virus infection  
50 Human immunodeficiency virus type 1 subtype identification



1 Human immunodeficiency virus 2 protein 58 antibody  
2 Deoxyribonucleic acid of Human immunodeficiency virus 2  
3 Finding of human immunodeficiency virus status  
4 Hepatitis B associated with Human immunodeficiency virus infection  
5 Disorder of kidney co-occurrent with human immunodeficiency virus infection  
6 Human immunodeficiency virus World Health Organization class II  
7 Hemophagocytic syndrome co-occurrent with human immunodeficiency virus infection  
8 Disorder of eye co-occurrent with human immunodeficiency virus infection  
9 Hepatomegaly co-occurrent with human immunodeficiency virus infection  
10 Human immunodeficiency virus viral load by log rank  
11 Human immunodeficiency virus, type II antibody  
12 Human immunodeficiency virus, type II protein 16 Ab  
13 Human immunodeficiency virus type I  
14 Human immunodeficiency virus 2 protein 55 antibody  
15 Human immunodeficiency virus antigen test  
16 Human immunodeficiency virus, type II protein 24 antibody  
17 Human immunodeficiency virus, type II protein 56 antibody  
18 Determination of coreceptor tropism of Human immunodeficiency virus 1  
19 Infection caused by herpes zoster virus co-occurrent with human immunodeficiency virus infection  
20 Human immunodeficiency virus type 2 antiviral resistance measurement by ribonucleic acid analysis  
21 Infection caused by Pneumocystis co-occurrent with human immunodeficiency virus infection  
22 Human immunodeficiency virus, type I protein 65 antibody  
23 H/O asymptomatic human immunodeficiency virus infection  
24 Determination of susceptibility of Human immunodeficiency virus 1 to panel of antiretroviral drugs using geno  
25 Infection caused by Strongyloides co-occurrent with human immunodeficiency virus infection  
26 Eruption of skin co-occurrent with human immunodeficiency virus infection  
27 Human immunodeficiency virus World Health Organization 2007 stage 2 co-occurrent with tuberculosis  
28 Human immunodeficiency virus complicating pregnancy childbirth and the puerperium  
29 Dementia co-occurrent with human immunodeficiency virus infection  
30 Human immunodeficiency virus, type I protein 58 antibody  
31 Infection caused by Coccidia co-occurrent with human immunodeficiency virus infection  
32 Antibody to human immunodeficiency virus, type I glycoprotein 40  
33 World Health Organization 2007 Human immunodeficiency virus infection clinical stage 3  
34 Human immunodeficiency virus, type II protein antigen 41  
35 Human immunodeficiency virus type 1 antibody  
36 Human immunodeficiency virus myopathy  
37 Human immunodeficiency virus infection with infectious mononucleosis-like syndrome  
38 Human immunodeficiency virus deoxyribonucleic acid  
39 Disorder of gastrointestinal tract co-occurrent with human immunodeficiency virus infection  
40 Aplastic anaemia co-occurrent with human immunodeficiency virus infection  
41 Acute human immunodeficiency virus infection  
42 Human immunodeficiency virus type 2 antibody  
43 Human immunodeficiency virus type 1  
44 Human immunodeficiency virus World Health Organization 2007 stage 1 co-occurrent with tuberculosis  
45 Fever of unknown origin co-occurrent with human immunodeficiency virus infection  
46 Human immunodeficiency virus type 1 antiviral resistance measurement by ribonucleic acid analysis  
47 Human immunodeficiency virus infection monitoring first telephone invitation  
48 Human immunodeficiency virus type 1 identification  
49 Human immunodeficiency virus 2 protein 15 antibody  
50 Human immunodeficiency virus type 2  
51  
52  
53  
54  
55  
56  
57  
58  
59  
60

1 Human immunodeficiency virus 2 glycoprotein 36 antibody  
2 Microsporidiosis co-occurrent with human immunodeficiency virus infection  
3 Recurrent salmonella sepsis co-occurrent with human immunodeficiency virus infection  
4 Reactive for both human immunodeficiency virus antibodies and p24 antigen  
5 Neuritis co-occurrent with human immunodeficiency virus infection  
6 Neuropathy caused by human immunodeficiency virus  
7 Ribonucleic acid of Human immunodeficiency virus 2  
8 Human immunodeficiency virus, type I glycoprotein 40 antibody  
9 Polyneuropathy co-occurrent with human immunodeficiency virus infection  
10 Human immunodeficiency virus medication review  
11 Human immunodeficiency virus 1 and virus 2 antibodies and Human immunodeficiency virus 1 p24 antigen co  
12 Human immunodeficiency virus 1 deoxyribonucleic acid  
13 Human immunodeficiency virus Centers for Disease Control and Prevention category C1 (acquired immunodef  
14 Human immunodeficiency virus infection with persistent generalized lymphadenopathy  
15 Human immunodeficiency virus with secondary cancers  
16 Human immunodeficiency virus 2 glycoprotein 105 antibody  
17 Lymphadenopathy co-occurrent with human immunodeficiency virus infection  
18 Immunoblastic lymphoma co-occurrent with human immunodeficiency virus infection  
19 Human immunodeficiency virus monitoring  
20 Human immunodeficiency virus with neurological disease  
21 Anti-Human immunodeficiency virus, type II protein 16 antibody  
22 Human immunodeficiency virus World Health Organization 2007 stage 4 co-occurrent with malaria  
23 Herpes simplex virus infection co-occurrent with human immunodeficiency virus infection  
24 Human immunodeficiency virus Centers for Disease Control and Prevention category C3 (acquired immunodef  
25 Human immunodeficiency virus non-pathogenic diarrhea  
26 Human immunodeficiency virus type I enhancer binding protein 2 related intellectual disability  
27 Proviral DNA of Human immunodeficiency virus 1  
28 Human immunodeficiency virus Centers for Disease Control and Prevention category A2  
29 Human immunodeficiency virus, type I protein 64 antibody  
30 Chronic infection caused by herpes simplex virus co-occurrent with human immunodeficiency virus infection  
31 Aspergillosis co-occurrent with human immunodeficiency virus infection  
32 Human immunodeficiency virus positive general health check service declined  
33 Referral to community human immunodeficiency virus nurse specialist  
34 Human immunodeficiency virus infection monitoring second telephone invitation  
35 [V]Asymptomatic human immunodeficiency virus infection status  
36 aids carrier  
37 notification of aids  
38 aids  
39 aids - acquired immunodeficiency syndrome  
40 acquired immune deficiency syndrome (aids)  
41 aids - first presentation  
42 aids - subsequent presentation  
43 kaposi sarcoma associated with aids  
44 mycobacteriosis associated with aids  
45 dementia associated with aids  
46 aids - acquired immune deficiency syndrome dementia complex  
47 pneumonia associated with aids  
48 cachexia associated with aids  
49 hiv infection with symptoms, not aids - first presentation  
50 hiv infection with symptoms, not aids - subsequent presentation

1  
2 aids +viral/chlamydial dis.nos  
3 [rfc] hiv/aids  
4 [rfc] aids/hiv  
5 aids carrier  
6 notification of aids  
7 Transplantation of pancreas  
8 Renal transplant  
9 Replacement of previous liver transplant  
10 Renewal of transplanted pancreatic tissue  
11 Cadaveric renal transplant  
12 Exploration of renal transplant  
13 Kidney transplant failure and rejection  
14 Heart transplant failure and rejection  
15 Heart-lung transplant failure and rejection  
16 Single lung transplant  
17 Double lung transplant  
18 Renal transplant rejection  
19 Very mild acute rejection of renal transplant  
20 Acute rejection of renal transplant - grade I  
21 Chronic transplant nephropathy  
22 Acute-on-chronic rejection of renal transplant  
23 Unexplained episode of renal transplant dysfunction  
24 Transplantation of islets of Langerhans  
25 Transplant biopsy  
26 Pancreas transplant  
27 Renal transplant rejected  
28 Post-transplant bronchiolitis obliterans syndrome  
29 Lung transplant evaluation  
30 Urological complication of renal transplant  
31 Vascular complication of renal transplant  
32 Rupture of artery of transplanted kidney  
33 Paediatric transplantation surgery  
34 Transplantation of heart and lung NOS  
35 Other specified other transplantation of heart  
36 Other specified transplantation of kidney  
37 Transplantation of kidney NOS  
38 Orthotopic transplantation of liver  
39 Renal transplant with complication  
40 Piggy back liver transplant  
41 Interventions associated with transplantation of kidney NOS  
42 Allotransplantation of kidney from cadaver  
43 Excision of rejected transplanted kidney  
44 Corneal transplant  
45 Renal transplant rejected  
46 [V]Pancreas transplanted  
47 Transplanted liver present  
48 Tx - Kidney transplantation  
49 SLTx - Single lung transplant  
50 Mild chronic transplant nephropathy  
51 History of renal transplant



1 Liver transplant recipient  
2 Whole organ pancreatic transplant  
3 Hepatic transplantation  
4 PTLD - Post-transplant lymphoproliferative disorder  
5 Exploration of kidney transplant  
6 Kidney transplant  
7 [V]Liver transplanted  
8 History of organ transplant  
9 History of being lung transplant recipient  
10 Heart transplant  
11 Allotransplantation of kidney with DBD (donation after brain stem death)  
12 Renal autotransplantation or reimplantation of kidney  
13 LTx - Liver transplant  
14 Tx - Renal transplantation  
15 Xenotransplant of heart  
16 Transplant of lung  
17 Islet cell transplant  
18 Autotransplant kidney  
19 Disorder affecting transplant  
20 DLTx - Double lung transplant  
21 Tx - Liver transplantation  
22 Piggy-back liver transplant  
23 Allotransplant of heart and lung  
24 Heart transplant  
25 Structure of transplanted liver  
26 Anaesthesia for corneal transplant  
27 MR angiography of transplanted kidney  
28 Magnetic resonance angiography of transplanted kidney  
29 Monomorphic posttransplant lymphoproliferative disorder  
30 Immunosuppressive therapy for transplant  
31 Awaiting transplantation of lung  
32 Radionuclide imaging of transplanted kidney  
33 Renal homotransplantation excluding donor and recipient nephrectomy  
34 Renal transplant venogram  
35 Infectious mononucleosis-like post-transplant lymphoproliferative disorder  
36 Aftercare for liver transplant done  
37 Emergency hospital admission to cardiothoracic transplantation surgery service  
38 [V]Kidney transplanted  
39 Structure of transplanted kidney  
40 Ultrasound scan of transplant liver  
41 Failed renal transplant  
42 Specimen from transplanted lung obtained by excision  
43 Rejection of pancreas transplant  
44 Percutaneous transhepatic transplantation of pancreatic islet cell using fluoroscopic guidance  
45 Transplantation of kidney and pancreas  
46 Transplanted cornea  
47 Liver transplant rejection  
48 Entire transplanted pancreatic islets  
49 Cardiac transplant disorder  
50 Fluoroscopic venography of transplanted pancreas using contrast

1 Anaesthesia for heart/lung transplant  
2 Anesthesia for heart/lung transplant  
3 Retrograde insertion of ureteric stent into ureter of transplanted kidney using fluoroscopic guidance  
4 Double lung transplant en bloc  
5 Lung transplant rejection  
6 Post transplant lymphoproliferative disorder  
7 Bronchiolitis obliterans syndrome due to and after lung transplantation  
8 Transplant renal artery stenosis  
9 Disorder of heart muscle associated with rejection of cardiac transplant  
10 Laparoscopic biopsy of transplanted pancreas  
11 Doppler ultrasonography (US) of transplanted kidney  
12 Liver transplant recipient  
13 History of heart-lung transplant recipient  
14 Entire transplanted islets of Langerhans  
15 Emergency hospital admission to transplantation surgery service  
16 Disorder of transplanted heart  
17 Structure of renal artery of transplanted kidney  
18 Double lung transplant as a block  
19 Renal transplant venogram  
20 Transplanted heart-lung present  
21 BSSLTx - Bilateral sequential single lung transplant  
22 Chronic rejection of liver transplant  
23 Reactive plasmacytic hyperplasia post-transplant lymphoproliferative disorder  
24 Lung transplant recipient  
25 Transplanted lung resection sample  
26 Anesthesia for renal transplant  
27 Heterotransplant of pancreas  
28 Anesthesia for corneal transplant  
29 Discharge from transplant surgery service  
30 Revision of transplantation of heart  
31 Renal transplant angiogram  
32 History of pancreas transplant  
33 Allotransplantation of lobe of lung from live donor  
34 Transplanted kidney present  
35 Complication of transplanted liver  
36 Homotransplant of pancreas  
37 Anaesthesia for heart transplant  
38 Primary non-function of renal transplant  
39 Kidney transplant recipient  
40 History of transplantation of pancreas  
41 Early post-transplant lymphoproliferative disorder  
42 Cornea transplant recipient  
43 Liver transplant without recipient hepatectomy  
44 Fluoroscopic venography of renal transplant  
45 Hyperacute rejection of pancreas transplant  
46 Fluoroscopic angiography of transplanted liver  
47 [V]Lung transplanted  
48 Renal transplant recipient  
49 Fluoroscopy guided retrograde insertion of stent into ureter of transplanted kidney  
50 Cardiothoracic transplantation care plan

1 Liver transplant failure  
2 Cardiac transplant failure  
3 Perfusion injury of renal transplant  
4 Disorder related to renal transplantation  
5 Accelerated rejection of pancreas transplant  
6 Transplanted lung  
7 Bilateral sequential single lung transplant  
8 Hyperacute rejection of renal transplant  
9 Transplanted lung present  
10 Emergency hospital admission to paediatric transplantation surgery service  
11 Fluoroscopy guided removal of nephrostomy tube from transplanted kidney  
12 Acute rejection of lung transplant  
13 Heart transplant recipient  
14 Kidney transplant evaluation  
15 Entire transplanted lung  
16 Cardiac transplant rejection  
17 Doppler ultrasound scan of transplanted kidney  
18 Structure of transplanted islets of Langerhans  
19 Living donor liver transplantation  
20 Disorder related to lung transplantation  
21 Chronic rejection of cardiac transplant  
22 Structure of transplanted cornea  
23 Transplanted kidney  
24 LTx - Lung transplant  
25 Allotransplantation of kidney from non-beating heart cadaver  
26 Transplanted cornea present  
27 Transplant present  
28 Percutaneous needle biopsy of transplanted pancreas  
29 Heart-lung transplant recipient  
30 Spinal cord transplantation  
31 CT of transplanted liver  
32 Cardiovascular system transplantation  
33 Ultrasound guided biopsy of transplanted liver  
34 Anaesthesia for renal transplant  
35 US scan of transplant pancreas  
36 Structure of transplanted lung  
37 Allotransplantation of right kidney  
38 Allogeneic transplantation of pancreatic islet cells  
39 Transplanted heart  
40 Disorder of myocardium associated with rejection of cardiac transplant  
41 Pretransplant evaluation of liver recipient  
42 Autotransplantation of heart  
43 Anesthesia for liver transplant  
44 Entire transplanted heart  
45 Chronic kidney disease stage 5 with transplant  
46 Acute rejection of pancreas transplant  
47 Complication of transplanted heart  
48 Ultrasound scan of transplant pancreas  
49 Structure of transplanted heart  
50 Heart transplant biopsy

1 Post transplant lymphoproliferative disorder  
2 Arteriosclerosis of coronary artery bypass graft of transplanted heart  
3 Cardiothoracic transplantation service  
4 Fluoroscopy guided percutaneous transjugular biopsy of transplanted liver  
5 Disorder of transplanted kidney  
6 [V]Heart and lungs transplant status  
7 Auxiliary heart transplant  
8 Orthotopic transplantation of liver  
9 Transplantation of kidney regime  
10 [V]Heart transplanted  
11 Kidney transplant with complication  
12 [V]Transplanted organ or tissue  
13 [V]Transplanted organ  
14 [X]Failure & rejection of other transplanted organ & tissue  
15 Organ transplant with complication  
16 Transplantation of liver NOS  
17 Transplantation of pancreas NOS  
18 Cardiothoracic transplantation  
19 Transplantation surgery  
20 Orthotopic transplantation of whole liver  
21 Chronic rejection of renal transplant - grade 1  
22 Chronic rejection of renal transplant - grade III  
23 Excision of rejected transplanted kidney  
24 Transplanted organ rejection  
25 Transplantation of tail of pancreas  
26 Transplantation of kidney  
27 Doppler ultrasound of transplanted kidney  
28 Ultrasound guided insertion of nephrostomy tube into transplanted kidney  
29 Doppler ultrasound of transplanted liver  
30 Structure of transplanted pancreas  
31 Ultrasound scan of transplant kidney  
32 Transplant renal vein thrombosis  
33 Hyperacute rejection of liver transplant  
34 Specimen from transplanted kidney obtained by biopsy  
35 Hyperacute rejection of lung transplant  
36 Chronic rejection of pancreas transplant  
37 Doppler ultrasonography of blood vessel of organ transplant  
38 Accelerated coronary artery disease in transplanted heart  
39 [V]Liver transplanted  
40 Examination of recipient after kidney transplant  
41 Heterotopic liver transplant  
42 Fluoroscopic angiography of renal transplant  
43 Fluoroscopy guided insertion of nephrostomy tube into transplanted kidney  
44 Recurrent post-transplant renal disease  
45 Removal of nephrostomy tube from transplanted kidney using fluoroscopic guidance  
46 Solid organ transplant  
47 End stage renal failure with renal transplant  
48 Doppler ultrasonography of transplanted kidney  
49 Radioisotope hepatobiliary function study with stimulation post transplant  
50 Fluoroscopic venogram of transplanted pancreas using contrast

1 Post-transplant neoplasia  
2 Transplanted heart present  
3 Corneal transplant  
4 Moderate chronic transplant nephropathy  
5 Transplantation of islet cells  
6 Piggy-back heart transplant  
7 Heart-lung transplant with recipient cardiectomy-pneumonectomy  
8 Heart and lung transplant  
9 Removal of transplanted kidney  
10 [V]Lung transplanted  
11 Organ transplant with complication  
12 Other specified transplantation of lung  
13 Transplantation of lung NOS  
14 Other specified transplantation of heart and lung  
15 Aneurysm of vein of transplanted kidney  
16 Thrombosis of vein of transplanted kidney  
17 Antegrade insertion of ureteric stent into ureter of transplanted kidney using fluoroscopic guidance  
18 Accelerated rejection of renal transplant  
19 Excision of transplanted pancreas  
20 Transplantation of liver  
21 Transplantation surgery  
22 Transplanted organ failure  
23 Normal renal function of transplanted kidney  
24 Anaesthesia for liver transplant  
25 US scan of transplant kidney  
26 US doppler scan of transplanted kidney  
27 Bronchus transplantation  
28 Post-transplant lymphoproliferative disorder  
29 Doppler ultrasound scan of transplanted liver  
30 Transplantation of single lobe of lung  
31 Transplanted liver present  
32 Polymorphic lymphoproliferative disorder following transplant  
33 Transplanted organ  
34 MRI angiogram of transplanted liver  
35 Fluoroscopy and angioplasty of renal transplant  
36 Pleura transplantation  
37 Entire transplanted cornea  
38 Accelerated rejection of liver transplant  
39 Post-lung transplantation bronchiectasis  
40 Heart transplant recipient  
41 Doppler ultrasonography of transplanted liver  
42 Doppler ultrasound of transplant liver  
43 Fluoroscopy guided antegrade insertion of stent into ureter of transplanted kidney  
44 Hyperacute rejection of cardiac transplant  
45 Vesicoureteric reflux after renal transplant  
46 Ultrasonography guided biopsy of transplanted kidney  
47 Renal artery stenosis of transplanted kidney  
48 Part organ pancreatic transplant  
49 Post transplant lymphoproliferative disorder  
50 Orthotopic liver transplant

1 Autotransplantation of kidney  
2 Live donor renal allotransplant  
3 Hypertension associated with transplantation  
4 Fluoroscopic angioplasty of renal transplant  
5 Renal autotransplantation  
6 Corneal transplant  
7 CTx - Cardiac transplant  
8 [X]Renal tubulo-interstitial disorders/transplant rejection  
9 Autotransplant of kidney  
10 Auxillary liver transplant  
11 OS interventions associated with transplantation of kidney  
12 Transplanted organ complication NOS  
13 Xenotransplantation of heart  
14 Transplantation of kidney from cadaver  
15 Other specified transplantation of liver  
16 Aneurysm of artery of transplanted kidney  
17 Thrombosis of artery of transplanted kidney  
18 [RFC] Renal transplant  
19 Allotransplantation of kidney from live donor  
20 Acute rejection of renal transplant - grade II  
21 Ultrasonography of transplanted kidney with contrast  
22 Transplanted liver  
23 Transplant glomerulopathy  
24 Acute rejection of cardiac transplant  
25 Chronic rejection of lung transplant  
26 Autologous transplantation of pancreatic islet cells  
27 Radionuclide study of transplanted kidney  
28 Laparoscopic biopsy of transplanted kidney  
29 Entire transplant kidney  
30 Renal tubulo-interstitial disorders in transplant rejection  
31 Entire transplanted pancreas  
32 Lung transplant biopsy sample  
33 Ultrasonography guided biopsy of transplanted liver  
34 CT guided biopsy of transplanted liver  
35 Transplant glomerulopathy - early form  
36 Complication of transplanted kidney  
37 Fluoroscopic angiogram of transplanted liver  
38 Fluoroscopy guided removal of nephrostomy tube from transplanted kidney  
39 Entire transplanted liver  
40 [V]Heart transplanted  
41 Entire transplanted kidney  
42 Fluoroscopy guided percutaneous transhepatic transplantation of pancreatic islet cell  
43 History of renal transplant  
44 Eye structure transplantation  
45 Live donor renal transplant  
46 Allotransplantation of kidney from beating heart cadaver  
47 Percutaneous thrombolysis of vein of transplanted pancreas using fluoroscopic guidance  
48 Accelerated rejection of lung transplant  
49 Tissue specimen from transplanted kidney  
50 Other transplantation of heart

1 History of lung transplant  
2 Kidney transplantation  
3 Cadaveric heart transplant  
4 Heterotopic allotransplant of heart  
5 Allotransplant of heart  
6 Cadaver renal allotransplant  
7 Bronchiolitis obliterans syndrome after lung transplantation  
8 HtTx - Heart transplant  
9 Allotransplantation of kidney with DCD (donation after cardiac death)  
10 Heart transplantation  
11 Post-transplantation of kidney examination of recipient  
12 Allotransplantation of heart and lung  
13 Heart transplant with complication  
14 Orthotopic transplantation of liver NEC  
15 Transplantation of heart and lung  
16 Rupture of vein of transplanted kidney  
17 Stenosis of vein of transplanted kidney  
18 Post-transplant bronchiolitis obliterans syndrome  
19 Complication of transplanted lung  
20 Liver transplant  
21 Piggyback transplantation of heart  
22 Cardiothoracic transplantation  
23 Complication of transplanted lung  
24 Transplantation of pancreas and duodenum  
25 Transplantation of whole pancreas  
26 Revision of transplantation of heart and lung  
27 Transplant rejection  
28 Liver transplant failure and rejection  
29 Xenograft renal transplant  
30 Chronic rejection of renal transplant - grade II  
31 De novo transplant disease  
32 Complication of transplanted pancreas  
33 Transplantation of adrenal gland  
34 Hypertension secondary to kidney transplant  
35 Allotransplantation of left kidney  
36 Transluminal right ventricular biopsy after heart transplant  
37 Accelerated rejection of cardiac transplant  
38 Fluoroscopy guided antegrade insertion of ureteric stent into ureter of transplanted kidney  
39 [V]Cornea transplanted  
40 [V]Transplanted organ or tissue  
41 Liver transplant with recipient hepatectomy  
42 Anesthesia for heart transplant  
43 Biopsy of transplanted kidney using ultrasound guidance  
44 History of islet cell transplant  
45 Pre-existing disease in renal transplant  
46 Autotransplant of lung  
47 Structure of transplanted pancreatic islets  
48 CT of transplanted liver with contrast  
49 Total pancreatectomy with transplantation  
50 Magnetic resonance angiography of transplanted liver

1 Specimen from transplanted lung obtained by biopsy  
2 Heart-lung transplant recipient  
3 Transplant of kidney using robotic assistance  
4 MRI of transplanted liver  
5 US scan of transplant liver  
6 Heart transplant with recipient cardiectomy  
7 [V]Transplanted organ  
8 Ultrasound scan of transplanted kidney with contrast  
9 Acute rejection of liver transplant  
10 Allotransplantation of islets of Langerhans  
11 Fluoroscopy guided retrograde insertion of ureteric stent into ureter of transplanted kidney  
12 Disorder related to cardiac transplantation  
13 Orthotopic allotransplant of heart  
14 Renal transplant arteriogram  
15 Post-renal transplant vesicoureteric reflux  
16 Entire renal artery of transplanted kidney  
17 Renal homotransplantation with unilateral recipient nephrectomy  
18 [X]Surgical operation with transplant of whole organ as the cause of abnormal reaction of the patient  
19 Transplanted organ complication  
20 Allotransplantation of kidney from cadaver NEC  
21 HTx - Heart transplant  
22 Pancreatic transplant  
23 Transplanted pancreas pancreatectomy  
24 Transplant of kidney  
25 Fluoroscopic angioplasty of transplanted liver  
26 HLTx - Heart lung transplant  
27 Cornea transplant recipient  
28 Severe chronic transplant nephropathy  
29 Auxiliary liver transplant  
30 Disorder affecting transplanted structure  
31 Liver transplant with complication  
32 Other specified transplantation of pancreas  
33 Allotransplantation of heart NEC  
34 Revision of transplantation of heart NEC  
35 Other transplantation of heart NOS  
36 Under regular review by lung transplant unit  
37 Lung transplant  
38 Interventions associated with transplantation of kidney  
39 Transplant immunosuppression  
40 Acute rejection of renal transplant  
41 Acute rejection of renal transplant - grade III  
42 Chronic rejection of renal transplant  
43 Renal transplant biopsy sample  
44 Live donor liver transplant  
45 Ultrasonography guided insertion of nephrostomy tube into transplanted kidney  
46 Coronary arteriosclerosis in native artery of transplanted heart  
47 Liver transplant disorder  
48 Transplantation of heart  
49 History of heart recipient  
50 H/O: heart recipient



1 History of - lung recipient  
2 H/O: lung recipient  
3 H/O: kidney recipient  
4 History of - kidney recipient  
5 H/O: liver recipient  
6 History of liver recipient  
7 Autologous peripheral blood stem cell transplant  
8 Allogeneic peripheral blood stem cell transplant  
9 History of peripheral stem cell transplant  
10 Limbal stem cell allograft transplantation  
11 Peripheral blood stem cell transplantation  
12 Hemopoietic stem cell transplant  
13 Haemopoietic stem cell transplant  
14 Limbal stem cell transplantation  
15 Syngeneic peripheral blood stem cell transplant  
16 Syngeneic peripheral blood stem cell transplantation  
17 Immune system transplantation  
18 Transplantation of stem cells  
19 Transplantation of autologous hematopoietic stem cell  
20 Transplantation of autologous haematopoietic stem cell  
21 Allogeneic bone marrow graft  
22 Grafting of bone marrow using allograft from unmatched unrelated donor  
23 Syngeneic bone marrow graft  
24 Allogeneic related bone marrow graft  
25 T-cell depleted allogeneic bone marrow graft  
26 Rejection of bone marrow graft  
27 Bone marrow graft  
28 Autologous bone marrow graft  
29 Failed bone marrow transplant engraftment  
30 Failure of bone marrow graft  
31 Allogeneic unrelated bone marrow graft  
32 Imperfect T-cell depleted allogeneic bone marrow graft  
33 Allograft of bone marrow from matched unrelated donor  
34 Graft of cord blood to bone marrow  
35 Allograft of bone marrow from unmatched unrelated donor  
36 Graft of bone marrow NOS  
37 Chronic graft versus host disease after transplantation of bone marrow  
38 Other specified graft of bone marrow  
39 Allograft of bone marrow from sibling donor  
40 Grafting of bone marrow NOS  
41 Graft of bone marrow NOS  
42 Other specified graft of cord blood to bone marrow  
43 Allograft of bone marrow from haploidentical donor  
44 Allograft of cord blood to bone marrow  
45 Allograft of bone marrow NEC  
46 Graft of cord blood to bone marrow NOS  
47 Grafting of cord blood to bone marrow  
48 Autograft of bone marrow  
49 PBSC - Peripheral blood stem cell graft  
50 Peripheral blood stem cell graft

1 Bone marrow: myeloma cells  
2 Immunoproliferative neoplasm or myeloma NOS  
3 Myelomonocytic leukaemia  
4 Subacute myelomonocytic leukaemia  
5 Osteoporosis in multiple myelomatosis  
6 Kahler's disease  
7 Myelomatosis  
8 Multiple myeloma  
9 Lambda light chain myeloma  
10 Chronic myelomonocytic leukaemia  
11 [M]Acute myelomonocytic leukaemia  
12 [M]Plasma cell myeloma  
13 Juvenile myelomonocytic leukaemia  
14 Solitary myeloma  
15 Chronic myelomonocytic leukaemia  
16 [M]Monostotic myeloma  
17 [M]Multiple myeloma  
18 [M]Myeloma NOS  
19 [M]Myelomatosis  
20 [M]Plasmacytic myeloma  
21 [M]Solitary myeloma  
22 M4 - Acute myelomonocytic leukaemia  
23 Myeloma - solitary  
24 Multiple myeloma and immunoproliferative neoplasms  
25 Multiple myeloma etc.  
26 [RFC] Multiple myeloma  
27 Juvenile myelomonocytic leukaemia  
28 Acute myelomonocytic leukaemia  
29 Myeloma kidney  
30 Myelomalacia  
31 Myelomonocytic leukaemia  
32 Multiple myeloma  
33 Plasma cell myeloma  
34 Myeloma  
35 Multiple myeloma, no International Classification of Diseases for Oncology subtype  
36 Plasmacytic myeloma  
37 Myeloma  
38 AMML - Acute myelomonocytic leukaemia  
39 Chronic myelomonocytic leukemia  
40 Light chain myeloma  
41 Non-secretory myeloma  
42 Myeloma screening  
43 IgA myeloma  
44 IgG myeloma  
45 Immunoglobulin G myeloma  
46 IgD myeloma  
47 Plasma cell myeloma/plasmacytoma  
48 Smouldering myeloma  
49 Kappa light chain myeloma  
50 Plasma cell myeloma/plasmacytoma

1 Solitary osseous myeloma  
2 Monostotic myeloma  
3 Asymptomatic multiple myeloma  
4 Asymptomatic myeloma  
5 Indolent multiple myeloma  
6 History of multiple myeloma  
7 Chronic myelomonocytic leukaemia  
8 Chronic myelomonocytic leukaemia  
9 Chronic myelomonocytic leukemia  
10 Chronic lymphoid leukaemia  
11 Lymphatic leukaemia  
12 Lymphoid leukaemia  
13 Subacute lymphoid leukaemia  
14 Other lymphoid leukaemia  
15 Aleukaemic lymphoid leukaemia  
16 Other lymphoid leukaemia NOS  
17 Lymphoid leukaemia NOS  
18 [M]Lymphoid leukaemias  
19 Acute lymphoblastic leukaemia - category  
20 [M]Subacute lymphoid leukaemia  
21 [M]Aleukaemic lymphoid leukaemia  
22 [M]Lymphosarcoma cell leukaemia  
23 [M]Lymphosarcoma cell leukaemia NOS  
24 [X]Other lymphoid leukaemia  
25 B-cell chronic lymphocytic leukaemia  
26 T-cell prolymphocytic leukaemia  
27 B-cell acute lymphoblastic leukaemia  
28 B-cell prolymphocytic leukaemia  
29 Acute lymphoid leukaemia  
30 [M]Prolymphocytic leukaemia  
31 [V]Personal history of lymphoid leukaemia  
32 [M]Lymphoid leukaemia NOS  
33 Prolymphocytic leukaemia  
34 Chronic lymphoid leukaemia  
35 [M]Lymphatic leukaemia  
36 [M]Lymphosarcoma cell leukaemias  
37 Lymphoid leukaemia  
38 Chronic lymphoid leukaemia, disease  
39 Lymphosarcoma cell leukaemia  
40 Lymphoid leukaemia - acute  
41 Lymphoid leukaemia - chronic  
42 Lymphoid leukaemia - subacute  
43 Prolymphocytic leukemia of T-cell type  
44 Prolymphocytic leukaemia of B-cell type  
45 Chronic lymphocytic leukaemia of B-cell type  
46 Clinical stage A chronic lymphocytic leukaemia  
47 Clinical stage B chronic lymphocytic leukaemia  
48 Clinical stage C chronic lymphocytic leukaemia  
49 Lymphocytic leukemia  
50 Lymphocytic leukaemia

1  
2 Chronic lymphocytic leukaemia  
3 Chronic lymphocytic leukemia  
4 Chronic lymphoid leukemia  
5 Chronic lymphatic leukemia  
6 Chronic lymphatic leukaemia  
7  
8 Chronic lymphocytic leukaemia, B-cell type  
9 Acute lymphoid leukemia  
10 ALL - Acute lymphoblastic leukaemia  
11 CLL - Chronic lymphocytic leukaemia  
12 CLL - Chronic lymphocytic leukemia  
13 Prolymphocytic leukemia, T-cell type  
14 Acute lymphoblastic leukemia  
15 Lymphoblastic leukaemia  
16 Acute lymphocytic leukaemia  
17 Acute lymphoblastic leukaemia  
18 Prolymphocytic leukaemia  
19 Lymphoid leukaemia (category)  
20 Subacute lymphoid leukemia  
21 B-CLL - B-cell chronic lymphocytic leukemia  
22 B-CLL - B-cell chronic lymphocytic leukaemia  
23 T-cell chronic lymphocytic leukaemia  
24 Chronic lymphocytic prolymphocytic leukaemia syndrome  
25 Large granular lymphocytic leukaemia  
26 LGLL - Large granular lymphocytic leukemia  
27 B-cell acute lymphoblastic leukemia  
28 Pre B-cell acute lymphoblastic leukaemia  
29 Common acute lymphoblastic leukaemia  
30 T-cell acute lymphoblastic leukaemia  
31 Acute lymphoblastic leukaemia, transitional pre-B-cell  
32 Leukaemic infiltration of skin (T-cell lymphoblastic leukaemia)  
33 Philadelphia chromosome-positive acute lymphoblastic leukaemia  
34 Philadelphia chromosome-positive acute lymphoblastic leukemia  
35 Smouldering chronic lymphocytic leukaemia  
36 T-cell large granular lymphocytic leukaemia  
37 Philadelphia chromosome-negative precursor B-cell acute lymphoblastic leukaemia  
38 B lymphoblastic leukaemia lymphoma with t(9:22) (q34;q11.2); BCR-ABL 1  
39 Chronic lymphocytic leukaemia genetic mutation variant  
40 Acute lymphoid leukaemia relapse  
41 History of chronic lymphocytic leukaemia  
42 Monoclonal B-cell lymphocytosis chronic lymphocytic leukaemia-type  
43 B lymphoblastic leukaemia lymphoma with t(5;14)(q31;q32); IL3-IGH  
44 Precursor B-cell acute lymphoblastic leukaemia  
45 Other types of follicular non-Hodgkin's lymphoma  
46 [X]Other types of follicular non-Hodgkin's lymphoma  
47 Follicular non-Hodgkin's small cleaved cell lymphoma  
48 Follicular non-Hodgkin's large cell lymphoma  
49 Follicular non-Hodgkin's lymphoma  
50 Diffuse follicle centre lymphoma  
51 Paediatric follicular lymphoma  
52 [M]Follicular lymphosarcoma NOS

1 [M]Giant follicular lymphoma  
2 Follicular lymphoma NOS  
3 Follicular non-Hodgkin's mixed small cleaved and large cell lymphoma  
4 Follicular lymphoma  
5 Follicular lymphoma grade 1  
6 Follicular lymphoma grade 2  
7 Follicular lymphoma grade 3  
8 Follicular lymphoma, cutaneous follicle centre  
9 Other types of follicular lymphoma  
10 Other non-follicular lymphoma  
11 Follicular lymphoma grade 3a  
12 Follicular lymphoma grade 3b  
13 Cutaneous follicle centre lymphoma  
14 Follicular lymphoma, grade 3  
15 Follicular lymphoma, grade 2  
16 Follicular lymphoma  
17 Follicular non-Hodgkin's lymphoma, mixed small cleaved cell and large cell (clinical)  
18 Follicular lymphoma grade 2  
19 Follicular non-Hodgkin's lymphoma, large cell (clinical)  
20 Follicular low grade B-cell lymphoma  
21 Follicular malignant lymphoma - mixed cell type  
22 Follicular malignant lymphoma - small cleaved cell  
23 Follicular malignant lymphoma - large cell  
24 Follicular non-Hodgkin lymphoma  
25 Primary cutaneous follicular centre B-cell lymphoma  
26 Primary cutaneous follicle centre cell lymphoma  
27 Primary cutaneous follicle center cell lymphoma  
28 Follicular non-Hodgkin's lymphoma of soft tissue  
29 Follicular non-Hodgkin's lymphoma of lung  
30 Follicular non-Hodgkin's lymphoma of skin  
31 Follicular non-Hodgkin's lymphoma of intestine  
32 Follicular non-Hodgkin's lymphoma diffuse follicle centre sub-type grade 1  
33 Follicular non-Hodgkin's lymphoma diffuse follicle centre cell sub-type grade 2  
34 Follicular non-Hodgkin's lymphoma of lymph nodes of multiple sites  
35 Acquired human immunodeficiency virus infection syndrome NOS  
36 Eczema, thrombocytopenia, immunodeficiency syndrome  
37 Acquired immunodeficiency syndrome  
38  
39  
40  
41  
42  
43  
44  
45  
46  
47  
48  
49  
50  
51  
52  
53  
54  
55  
56  
57  
58  
59  
60

1  
2  
3  
4  
5  
6  
7  
8  
9  
10  
11  
12  
13  
14  
15  
16  
17  
18  
19  
20  
21  
22  
23  
24  
25  
26  
27  
28  
29  
30  
31  
32  
33  
34  
35  
36  
37  
38  
39  
40  
41  
42  
43  
44  
45  
46  
47  
48  
49  
50  
51  
52  
53  
54  
55  
56  
57  
58  
59  
60

For peer review only

1  
2  
3  
4  
5  
6  
7  
8  
9  
10  
11  
12  
13  
14  
15  
16  
17  
18  
19  
20  
21  
22  
23  
24  
25  
26  
27  
28  
29  
30  
31  
32  
33  
34  
35  
36  
37  
38  
39  
40  
41  
42  
43  
44  
45  
46  
47  
48  
49  
50  
51  
52  
53  
54  
55  
56  
57  
58  
59  
60

For peer review only

1  
2  
3  
4  
5  
6  
7  
8  
9  
10  
11  
12  
13  
14  
15  
16  
17  
18  
19  
20  
21  
22  
23  
24  
25  
26  
27  
28  
29  
30  
31  
32  
33  
34  
35  
36  
37  
38  
39  
40  
41  
42  
43  
44  
45  
46  
47  
48  
49  
50  
51  
52  
53  
54  
55  
56  
57  
58  
59  
60

For peer review only



1  
2  
3  
4  
5  
6  
7  
8  
9  
10  
11  
12  
13  
14  
15  
16  
17  
18  
19  
20  
21  
22  
23  
24  
25  
26  
27  
28  
29  
30  
31  
32  
33  
34  
35  
36  
37  
38  
39  
40  
41  
42  
43  
44  
45  
46  
47  
48  
49  
50  
51  
52  
53  
54  
55  
56  
57  
58  
59  
60

For peer review only

1  
2  
3  
4  
5  
6  
7  
8  
9  
10  
11  
12  
13  
14  
15  
16  
17  
18  
19  
20  
21  
22  
23  
24  
25  
26  
27  
28  
29  
30  
31  
32  
33  
34  
35  
36  
37  
38  
39  
40  
41  
42  
43  
44  
45  
46  
47  
48  
49  
50  
51  
52  
53  
54  
55  
56  
57  
58  
59  
60

For peer review only

1  
2  
3  
4  
5  
6  
7  
8  
9  
10  
11  
12  
13  
14  
15  
16  
17  
18  
19  
20  
21  
22  
23  
24  
25  
26  
27  
28  
29  
30  
31  
32  
33  
34  
35  
36  
37  
38  
39  
40  
41  
42  
43  
44  
45  
46  
47  
48  
49  
50  
51  
52  
53  
54  
55  
56  
57  
58  
59  
60

For peer review only

1  
2  
3  
4  
5  
6  
7  
8  
9  
10  
11  
12  
13  
14  
15  
16  
17  
18  
19  
20  
21  
22  
23  
24  
25  
26  
27  
28  
29  
30  
31  
32  
33  
34  
35  
36  
37  
38  
39  
40  
41  
42  
43  
44  
45  
46  
47  
48  
49  
50  
51  
52  
53  
54  
55  
56  
57  
58  
59  
60

For peer review only

1  
2  
3  
4  
5  
6  
7  
8  
9  
10  
11  
12  
13  
14  
15  
16  
17  
18  
19  
20  
21  
22  
23  
24  
25  
26  
27  
28  
29  
30  
31  
32  
33  
34  
35  
36  
37  
38  
39  
40  
41  
42  
43  
44  
45  
46  
47  
48  
49  
50  
51  
52  
53  
54  
55  
56  
57  
58  
59  
60

For peer review only

1  
2  
3  
4  
5  
6  
7  
8  
9  
10  
11  
12  
13  
14  
15  
16  
17  
18  
19  
20  
21  
22  
23  
24  
25  
26  
27  
28  
29  
30  
31  
32  
33  
34  
35  
36  
37  
38  
39  
40  
41  
42  
43  
44  
45  
46  
47  
48  
49  
50  
51  
52  
53  
54  
55  
56  
57  
58  
59  
60

For peer review only

1  
2  
3  
4  
5  
6  
7  
8  
9  
10  
11  
12  
13  
14  
15  
16  
17  
18  
19  
20  
21  
22  
23  
24  
25  
26  
27  
28  
29  
30  
31  
32  
33  
34  
35  
36  
37  
38  
39  
40  
41  
42  
43  
44  
45  
46  
47  
48  
49  
50  
51  
52  
53  
54  
55  
56  
57  
58  
59  
60

For peer review only

1  
2  
3  
4  
5  
6  
7  
8  
9  
10  
11  
12  
13  
14  
15  
16  
17  
18  
19  
20  
21  
22  
23  
24  
25  
26  
27  
28  
29  
30  
31  
32  
33  
34  
35  
36  
37  
38  
39  
40  
41  
42  
43  
44  
45  
46  
47  
48  
49  
50  
51  
52  
53  
54  
55  
56  
57  
58  
59  
60

For peer review only



1  
2  
3  
4  
5  
6  
7  
8  
9  
10  
11  
12  
13  
14  
15  
16  
17  
18  
19  
20  
21  
22  
23  
24  
25  
26  
27  
28  
29  
30  
31  
32  
33  
34  
35  
36  
37  
38  
39  
40  
41  
42  
43  
44  
45  
46  
47  
48  
49  
50  
51  
52  
53  
54  
55  
56  
57  
58  
59  
60

ay

For peer review only

|    |             |
|----|-------------|
| 1  |             |
| 2  | ICD-10 code |
| 3  | B20         |
| 4  | B20.0       |
| 5  | B20.1       |
| 6  | B20.2       |
| 7  | B20.2       |
| 8  | B20.3       |
| 9  | B20.4       |
| 10 | B20.5       |
| 11 | B20.6       |
| 12 | B20.7       |
| 13 | B20.7       |
| 14 | B20.8       |
| 15 | B20.9       |
| 16 | B21         |
| 17 | B21.0       |
| 18 | B21.1       |
| 19 | B21.1       |
| 20 | B21.2       |
| 21 | B21.3       |
| 22 | B21.7       |
| 23 | B21.8       |
| 24 | B21.9       |
| 25 | B21.9       |
| 26 | B22         |
| 27 | B22.0       |
| 28 | B22.1       |
| 29 | B22.2       |
| 30 | B22.2       |
| 31 | B22.7       |
| 32 | B23         |
| 33 | B23.0       |
| 34 | B23.1       |
| 35 | B23.2       |
| 36 | B23.2       |
| 37 | B23.8       |
| 38 | B24         |
| 39 | Z21         |
| 40 | O98.7       |
| 41 | R75         |
| 42 | R75         |
| 43 | Z71.7       |
| 44 | Z94.0       |
| 45 | Z94.1       |
| 46 | Z94.2       |
| 47 | Z94.2       |
| 48 | Z94.3       |
| 49 | Z94.4       |
| 50 | Z94.6       |
| 51 | Z94.7       |
| 52 | Z94.8       |
| 53 | Z94.8       |
| 54 | Z94.9       |
| 55 | C90         |
| 56 | C90.0       |
| 57 | C93.1       |
| 58 | C93.10      |
| 59 | C93.11      |
| 60 | C93.11      |
|    | C93.12      |

For peer review only

1  
2 C91.1  
3 C91.10  
4 C91.11  
5 C91.12  
6 C82  
7 C82.0  
8 C82.1  
9 C82.2  
10 C82.2  
11 C82.3  
12 C82.4  
13 C82.5  
14 C82.6  
15 C82.7  
16 C82.9  
17  
18  
19  
20  
21  
22  
23  
24  
25  
26  
27  
28  
29  
30  
31  
32  
33  
34  
35  
36  
37  
38  
39  
40  
41  
42  
43  
44  
45  
46  
47  
48  
49  
50  
51  
52  
53  
54  
55  
56  
57  
58  
59  
60

For peer review only

|    |                                                                                                   |
|----|---------------------------------------------------------------------------------------------------|
| 1  |                                                                                                   |
| 2  | Term                                                                                              |
| 3  | Human immunodeficiency virus [HIV] disease resulting in infectious and parasitic diseases         |
| 4  | HIV disease resulting in mycobacterial infection                                                  |
| 5  | HIV disease resulting in other bacterial infections                                               |
| 6  | HIV disease resulting in cytomegaloviral disease                                                  |
| 7  | HIV disease resulting in other viral infections                                                   |
| 8  | HIV disease resulting in candidiasis                                                              |
| 9  | HIV disease resulting in other mycoses                                                            |
| 10 | HIV disease resulting in Pneumocystis jirovecii pneumonia                                         |
| 11 | HIV disease resulting in multiple infections                                                      |
| 12 | HIV disease resulting in other infectious and parasitic diseases                                  |
| 13 | HIV disease resulting in unspecified infectious or parasitic disease                              |
| 14 | Human immunodeficiency virus [HIV] disease resulting in malignant neoplasms                       |
| 15 | HIV disease resulting in Kaposi sarcoma                                                           |
| 16 | HIV disease resulting in Burkitt lymphoma                                                         |
| 17 | HIV disease resulting in other types of non-Hodgkin lymphoma                                      |
| 18 | HIV disease resulting in other malignant neoplasms of lymphoid, haematopoietic and related tissue |
| 19 | HIV disease resulting in multiple malignant neoplasms                                             |
| 20 | HIV disease resulting in other malignant neoplasms                                                |
| 21 | HIV disease resulting in unspecified malignant neoplasm                                           |
| 22 | Human immunodeficiency virus [HIV] disease resulting in other specified diseases                  |
| 23 | HIV disease resulting in encephalopathy                                                           |
| 24 | HIV disease resulting in lymphoid interstitial pneumonitis                                        |
| 25 | HIV disease resulting in wasting syndrome                                                         |
| 26 | HIV disease resulting in multiple diseases classified elsewhere                                   |
| 27 | Human immunodeficiency virus [HIV] disease resulting in other conditions                          |
| 28 | Acute HIV infection syndrome                                                                      |
| 29 | HIV disease resulting in (persistent) generalized lymphadenopathy                                 |
| 30 | HIV disease resulting in haematological and immunological abnormalities, not elsewhere classified |
| 31 | HIV disease resulting in other specified conditions                                               |
| 32 | Unspecified human immunodeficiency virus [HIV] disease                                            |
| 33 | Asymptomatic human immunodeficiency virus [HIV] infection status                                  |
| 34 | Human immunodeficiency virus [HIV] disease complicating pregnancy, childbirth and the puerperium  |
| 35 | Laboratory evidence of human immunodeficiency virus [HIV]                                         |
| 36 | Human immunodeficiency virus [HIV] counselling                                                    |
| 37 | Kidney transplant status                                                                          |
| 38 | Heart transplant status                                                                           |
| 39 | Lung transplant status                                                                            |
| 40 | Heart and lungs transplant status                                                                 |
| 41 | Liver transplant status                                                                           |
| 42 | Bone transplant status                                                                            |
| 43 | Corneal transplant status                                                                         |
| 44 | Other transplanted organ and tissue status                                                        |
| 45 | Transplanted organ and tissue status, unspecified                                                 |
| 46 | Multiple myeloma and malignant plasma cell neoplasms                                              |
| 47 | Multiple myeloma                                                                                  |
| 48 | Chronic Myelomonocytic Leukaemia                                                                  |
| 49 | Chronic myelomonocytic leukemia not having achieved remission                                     |
| 50 | Chronic myelomonocytic leukemia, in remission                                                     |
| 51 | Chronic myelomonocytic leukemia, in relapse                                                       |
| 52 |                                                                                                   |
| 53 |                                                                                                   |
| 54 |                                                                                                   |
| 55 |                                                                                                   |
| 56 |                                                                                                   |
| 57 |                                                                                                   |
| 58 |                                                                                                   |
| 59 |                                                                                                   |
| 60 |                                                                                                   |

1  
2 Chronic lymphocytic leukaemia of B-cell type  
3 Chronic lymphocytic leukemia of B-cell type not having achieved remission  
4 Chronic lymphocytic leukemia of B-cell type in remission  
5 Chronic lymphocytic leukemia of B-cell type in relapse  
6 Follicular lymphoma  
7  
8 Follicular lymphoma grade I  
9 Follicular lymphoma grade II  
10 Follicular lymphoma grade III, unspecified  
11 Follicular lymphoma grade IIIa  
12 Follicular lymphoma grade IIIb  
13  
14 Diffuse follicle centre lymphoma  
15 Cutaneous follicle centre lymphoma  
16 Other types of follicular lymphoma  
17 Follicular lymphoma, unspecified  
18  
19  
20  
21  
22  
23  
24  
25  
26  
27  
28  
29  
30  
31  
32  
33  
34  
35  
36  
37  
38  
39  
40  
41  
42  
43  
44  
45  
46  
47  
48  
49  
50  
51  
52  
53  
54  
55  
56  
57  
58  
59  
60

1  
2  
3  
4  
5  
6  
7  
8  
9  
10  
11  
12  
13  
14  
15  
16  
17  
18  
19  
20  
21  
22  
23  
24  
25  
26  
27  
28  
29  
30  
31  
32  
33  
34  
35  
36  
37  
38  
39  
40  
41  
42  
43  
44  
45  
46  
47  
48  
49  
50  
51  
52  
53  
54  
55  
56  
57  
58  
59  
60

m

For peer review only

1  
2 Procodeid  
3 9851141000033117  
4 475141000033116  
5 548141000033117  
6 920741000033111  
7 391341000033118  
8 1430841000033118  
9 395141000033118  
10 8614041000033119  
11 8614141000033115  
12 256041000033110  
13 586541000033115  
14 750241000033113  
15 255941000033117  
16 255241000033114  
17 1608041000033116  
18 9850841000033118  
19 392041000033113  
20 256141000033114  
21 255141000033119  
22 391641000033114  
23 391741000033117  
24 391141000033116  
25 391541000033113  
26 391941000033119  
27 885441000033112  
28 474941000033115  
29 196141000033116  
30 1891841000033112  
31 395341000033115  
32 255741000033115  
33 391241000033111  
34 4907641000033116  
35 1891941000033116  
36 8963541000033110  
37 8963341000033115  
38 8963641000033111  
39 8963041000033117  
40 8962941000033110  
41 8963241000033113  
42 8963141000033118  
43 8963441000033114  
44 12198241000033110  
45 12198341000033117  
46 4259741000033112  
47 4259841000033119  
48 4157141000033115  
49 4157241000033110  
50 11695941000033111  
51 11696041000033118

1  
2 8193041000033117  
3 8193241000033113  
4 8193341000033115  
5 8193141000033118  
6 4954641000033115  
7 4954741000033112  
8 3269141000033118  
9 3268841000033118  
10 3268941000033114  
11 3269041000033117  
12 2717041000033110  
13 2717141000033114  
14 3138941000033115  
15 3139041000033112  
16 8581041000033111  
17 8581241000033115  
18 8581341000033113  
19 8581141000033110  
20 8197241000033116  
21 3083841000033118  
22 3012541000033111  
23 947341000033112  
24 3083741000033111  
25 9851041000033116  
26 11800041000033110  
27 9850741000033111  
28 11807741000033112  
29 11800141000033114  
30 11799941000033116  
31 11800241000033119  
32 11807641000033115  
33 2271141000033116  
34 9158341000033117  
35 2270941000033113  
36 2270841000033117  
37 2271041000033115  
38 196041000033115  
39 6138541000033119  
40 196941000033119  
41 1035541000033115  
42 196841000033110  
43 10955641000033118  
44 10955741000033110  
45 12037141000033115  
46 3059241000033110  
47 3059341000033117  
48 148541000033118  
49 7860141000033114  
50 7860241000033119  
51 7860341000033112

For peer review only



1  
2 7860441000033118  
3 10642541000033111  
4 10642441000033110  
5 3152841000033114  
6 3152741000033116  
7  
8 825641000033117  
9 825741000033114  
10 248341000033110  
11 248441000033116  
12  
13 3097441000033111  
14 3872441000033118  
15 3872641000033116  
16 3872941000033111  
17 3872541000033117  
18  
19 12398041000033110  
20 274741000033119  
21 822741000033117  
22 4156641000033110  
23 4156541000033114  
24 12398141000033114  
25 3952941000033115  
26 3952841000033111  
27 10974641000033119  
28 10974541000033115  
29  
30 386541000033117  
31 535541000033117  
32 8200041000033113  
33 8199841000033110  
34 8199941000033119  
35 8200141000033112  
36 523041000033113  
37 395241000033113  
38 10217041000033110  
39 4156041000033116  
40 4156141000033117  
41 390241000033116  
42 390341000033114  
43 390141000033111  
44 2090341000033111  
45 3057441000033119  
46 3898641000033113  
47 12195941000033113  
48 3057341000033113  
49 12195841000033117  
50 2090241000033118  
51 3898541000033112  
52 2090041000033114  
53 2090141000033113  
54 8947641000033114  
55 8947541000033113

For peer review only

1  
2 8947741000033117  
3 8947441000033112  
4 10388241000033111  
5 485641000033118  
6 10388341000033118  
7 421941000033118  
8 423841000033110  
9 4040741000033110  
10 3857341000033112  
11 333041000033113  
12 11693941000033112  
13 11694241000033118  
14 11694041000033114  
15 11694141000033113  
16 3994241000033113  
17 3994341000033115  
18 3994541000033110  
19 3994641000033111  
20 3994441000033114  
21 3994741000033119  
22 404741000033113  
23 404541000033117  
24 404641000033116  
25 8196341000033112  
26 8196241000033119  
27 4156941000033115  
28 4212641000033116  
29 4212741000033113  
30 4157041000033119  
31 9293441000033110  
32 474341000033119  
33 474441000033113  
34 6117341000033119  
35 1405941000033112  
36 10267341000033111  
37 9293541000033111  
38 6058941000033117  
39 10267541000033116  
40 5844941000033112  
41 5845241000033116  
42 6067041000033112  
43 6117141000033117  
44 1406041000033119  
45 6067141000033111  
46 6117241000033112  
47 10267441000033117  
48 5845041000033112  
49 5845141000033111  
50 4955741000033113  
51 4292641000033117

For peer review only

1 4452841000033111  
2 4374741000033117  
3 2590141000033110  
4 4452741000033118  
5 2590041000033111  
6 5845441000033115  
7 2590241000033115  
8 3964641000033114  
9 2589941000033118  
10 8838441000033117  
11 4374841000033110  
12 2038241000033112  
13 2212841000033110  
14 7877941000033115  
15 7877841000033111  
16 11667741000033115  
17 11667641000033112  
18 11667541000033111  
19 11667441000033110  
20 2746241000033110  
21 3997641000033116  
22 1073541000033119  
23 2746341000033117  
24 531841000033117  
25 531741000033110  
26 529241000033119  
27 529041000033110  
28 1073641000033118  
29 1077441000033114  
30 1073741000033110  
31 1077341000033115  
32 529341000033112  
33 6167441000033114  
34 6167541000033110  
35 3347941000033110  
36 3348041000033113  
37 3348241000033117  
38 3348141000033112  
39 540541000033112  
40 540641000033113  
41 2642041000033114  
42 547341000033118  
43 2642141000033113  
44 3983641000033110  
45 1506441000033117  
46 1506341000033111  
47 3983741000033118  
48 547541000033113  
49 4061141000033114  
50 4453741000033111

For peer review only

1  
2 1607941000033119  
3 12188941000033117  
4 6470841000033117  
5 12189441000033117  
6 12188741000033115  
7  
8 5292841000033112  
9 12189541000033116  
10 10334741000033117  
11 10334441000033112  
12 12189241000033118  
13 10334841000033110  
14 5292741000033119  
15 6471741000033117  
16 10334241000033111  
17 5292541000033110  
18 10334641000033114  
19 12189141000033113  
20 9118141000033112  
21 5292641000033111  
22 8233141000033111  
23 6471241000033111  
24 10334541000033113  
25 4374441000033112  
26 4374341000033118  
27 2258141000033111  
28 2258241000033116  
29 586441000033116  
30 579141000033110  
31 2799741000033116  
32 587041000033110  
33 2799841000033114  
34 2799641000033113  
35 2799541000033112  
36 587541000033117  
37 587141000033114  
38 5264741000033112  
39 5264641000033115  
40 11757341000033115  
41 630441000033119  
42 5976141000033112  
43 11665641000033118  
44 630641000033117  
45 11757541000033110  
46 11757441000033114  
47 11665541000033119  
48 5886241000033115  
49 630541000033118  
50 11757741000033119  
51 630341000033113  
52 11665441000033115

For peer review only

1 11757641000033111  
2 7860541000033117  
3 7860641000033116  
4 3092941000033116  
5 728841000033110  
6 10013741000033113  
7 10012941000033117  
8 749941000033114  
9 749841000033118  
10 1548941000033115  
11 1547741000033117  
12 1547941000033119  
13 749441000033116  
14 1547841000033110  
15 749341000033110  
16 1548841000033111  
17 749241000033117  
18 9703941000033112  
19 914141000033114  
20 750041000033117  
21 914041000033110  
22 750141000033118  
23 3050641000033118  
24 3050541000033119  
25 3177241000033114  
26 3177341000033116  
27 6428241000033115  
28 6428341000033113  
29 5355141000033111  
30 12185841000033116  
31 194941000033112  
32 4519141000033112  
33 775041000033114  
34 12185941000033112  
35 4519241000033117  
36 775141000033113  
37 194841000033116  
38 12330541000033110  
39 12330141000033118  
40 12330241000033113  
41 12330441000033114  
42 12330341000033115  
43 12330041000033117  
44 4522841000033118  
45 4522941000033114  
46 4188241000033115  
47 4187841000033117  
48 8839241000033114  
49 10494841000033114  
50 4187541000033119

For peer review only

1  
2 4188141000033110  
3 8839141000033119  
4 10494541000033112  
5 4187641000033118  
6 10494741000033116  
7 4187741000033110  
8 4188041000033111  
9 4187941000033113  
10 10494641000033113  
11 10488241000033116  
12 11781741000033116  
13 11781841000033114  
14 10488341000033114  
15 10488541000033119  
16 10488441000033115  
17 841641000033116  
18 841741000033113  
19 903741000033112  
20 38541000033110  
21 38641000033111  
22 901641000033116  
23 2012141000033113  
24 2012241000033118  
25 899041000033116  
26 899141000033117  
27 1495241000033117  
28 4202841000033118  
29 4957041000033116  
30 1495141000033112  
31 4202941000033114  
32 913741000033110  
33 913841000033117  
34 913941000033113  
35 914441000033118  
36 2617241000033110  
37 915041000033111  
38 914941000033111  
39 2659941000033117  
40 3922341000033115  
41 3922241000033113  
42 2157041000033111  
43 3097241000033110  
44 3097341000033117  
45 2157141000033110  
46 3097141000033115  
47 2156941000033110  
48 11492541000033114  
49 11492141000033117  
50 4269341000033118  
51 4269441000033112

For peer review only

1 4507541000033111  
2 4507641000033112  
3 10213141000033116  
4 10213241000033111  
5 10212841000033117  
6 10213041000033115  
7 10492141000033113  
8 10491841000033111  
9 10491941000033115  
10 10491741000033118  
11 10371941000033118  
12 10371741000033116  
13 12352841000033112  
14 12352741000033119  
15 12043541000033115  
16 12042941000033115  
17 11580041000033110  
18 11579841000033115  
19 11579741000033113  
20 11579941000033111  
21 4011441000033117  
22 1892041000033110  
23 3870741000033112  
24 4024741000033117  
25 3870641000033115  
26 3870841000033119  
27 4024841000033110  
28 4595041000033114  
29 1892141000033114  
30 4011541000033116  
31 3870941000033110  
32 1753741000033111  
33 1029541000033115  
34 3952141000033117  
35 1404241000033119  
36 3201541000033110  
37 3201641000033111  
38 1747941000033115  
39 7680641000033112  
40 4907741000033113  
41 11822741000033116  
42 11822841000033114  
43 11822941000033118  
44 11822541000033112  
45 11823041000033111  
46 11822641000033113  
47 3859041000033118  
48 3859141000033119  
49 4429441000033119  
50 4429341000033113

For peer review only

1  
2 4806041000033116  
3 4806141000033117  
4 11275641000033114  
5 11275841000033110  
6 11275541000033113  
7 11275741000033117  
8 11275341000033118  
9 11275441000033112  
10  
11 5833241000033118  
12 5832241000033113  
13 5832141000033118  
14 5832941000033116  
15 12292141000033119  
16 12292241000033114  
17 10599341000033111  
18 10599441000033117  
19 3217241000033119  
20 4806241000033112  
21 4806341000033119  
22 3217141000033114  
23 969841000033115  
24 1052641000033112  
25 8273941000033111  
26 8886841000033113  
27 8887041000033116  
28 8887141000033117  
29 8886941000033117  
30 3270341000033118  
31 2645141000033119  
32 2645241000033114  
33 3270241000033111  
34 1112241000033113  
35 1446641000033117  
36 1152341000033114  
37 10209441000033113  
38 10209641000033110  
39 10209741000033118  
40 10209541000033114  
41 1154241000033113  
42 8840041000033112  
43 8839941000033117  
44 8123841000033116  
45 8123941000033112  
46 8123641000033117  
47 8123541000033118  
48 8124041000033114  
49 8123741000033114  
50 3944041000033114  
51 3943941000033112  
52 3949941000033114

For peer review only



1 3949841000033118  
2 3949741000033111  
3 3950241000033113  
4 3950041000033117  
5 3950141000033118  
6 11420041000033110  
7 11420141000033114  
8 11419541000033118  
9 11419841000033116  
10 2995041000033111  
11 2994941000033111  
12 5886641000033117  
13 1904741000033110  
14 1904841000033117  
15 4326541000033119  
16 1904541000033119  
17 4326341000033114  
18 4326241000033116  
19 5886441000033119  
20 5886741000033114  
21 5886941000033112  
22 1904941000033113  
23 1905141000033112  
24 5886541000033118  
25 4326441000033115  
26 5886841000033116  
27 1905041000033113  
28 1904441000033115  
29 1904641000033118  
30 4803041000033114  
31 4803241000033118  
32 6455241000033110  
33 6455441000033111  
34 6455141000033115  
35 1430541000033115  
36 6455341000033117  
37 3102541000033119  
38 818041000033111  
39 11717441000033116  
40 11717541000033115  
41 11717741000033111  
42 11717641000033119  
43 9158941000033118  
44 1446841000033116  
45 6466841000033110  
46 4608241000033117  
47 4608141000033112  
48 4608441000033116  
49 2280341000033117  
50 9159041000033110

For peer review only

1  
2 2280241000033110  
3 734641000033116  
4 8614541000033112  
5 4608341000033110  
6 10740541000033118  
7 10740241000033115  
8 10740441000033119  
9 10740341000033113  
10 2188541000033112  
11 2188441000033111  
12 9075041000033117  
13 9076141000033113  
14 9074941000033117  
15 9076041000033114  
16 1460341000033118  
17 1455041000033117  
18 2076541000033113  
19 1506241000033118  
20 1454941000033117  
21 7739541000033119  
22 7739741000033110  
23 7739841000033117  
24 7739641000033118  
25 6529941000033113  
26 6530041000033117  
27 11940041000033110  
28 11940241000033119  
29 11939841000033111  
30 11939941000033115  
31 11940141000033114  
32 11940341000033112  
33 1508741000033113  
34 3997441000033118  
35 3982941000033114  
36 3997541000033117  
37 1005441000033112  
38 1519641000033110  
39 504241000033114  
40 1518641000033118  
41 1518541000033119  
42 9104141000033115  
43 3347541000033116  
44 3347441000033117  
45 951841000033112  
46 3347741000033112  
47 9104041000033119  
48 3347641000033115  
49 951741000033119  
50 8560941000033116  
51 8561041000033114

For peer review only

1  
2 8561041000033114  
3 1822101000006117  
4 2994741000033113  
5 2994841000033115  
6 4042541000033115  
7 4042641000033119  
8 6467741000033115  
9 6467841000033113  
10 11692941000033118  
11 11693041000033111  
12 11693141000033110  
13 11693241000033115  
14 12512241000033119  
15 12512541000033117  
16 12683741000033114  
17 12685541000033117  
18 12712841000033116  
19 12712941000033112  
20 12873041000033113  
21 12873141000033112  
22 12873241000033117  
23 12873341000033110  
24 12873441000033116  
25 12873541000033115  
26 12873641000033119  
27 12873741000033111  
28 13479441000033116  
29 13479841000033118  
30 13480141000033112  
31 2147041000033113  
32 2147141000033112  
33 3290341000033114  
34 3290441000033115  
35 3995941000033115  
36 3996041000033113  
37 3996141000033112  
38 4012441000033113  
39 4012541000033114  
40 5293341000033111  
41 5293541000033116  
42 6515841000033111  
43 6515941000033115  
44 11242141000033114  
45 11242241000033119  
46 12346841000033114  
47 12355441000033116  
48 12355541000033115  
49 12355641000033119  
50 12410041000033119  
51 12410141000033115

For peer review only

1  
2 1916141000033115  
3 13443641000033118  
4 13443741000033110  
5 1916241000033110  
6 10213341000033118  
7  
8 11749341000033114  
9 12886741000033110  
10 13443841000033117  
11 13443941000033113  
12 5989541000033118  
13 5989641000033117  
14 9069241000033119  
15 12378941000033116  
16 12379041000033113  
17 12379141000033112  
18 5325241000033117  
19 8298941000033110  
20 11780941000033112  
21 11781041000033119  
22 13417341000033112  
23 13417441000033118  
24 4164341000033119  
25 8233841000033117  
26 10358641000033117  
27 13058741000033112  
28 13058841000033119  
29 4164441000033113  
30 8233941000033113  
31 10358741000033114  
32 13058941000033110  
33 10371741000033116  
34 12584041000033117  
35 12584141000033118  
36 12584241000033113  
37 12584341000033115  
38 12883841000033114  
39 12883941000033118  
40 12884041000033116  
41 12884441000033113  
42 12458141000033114  
43 12458241000033119  
44 13303441000033115  
45 13303541000033119  
46 8962941000033110  
47 8963041000033117  
48 8963141000033118  
49 8963241000033113  
50 8963541000033110  
51 8193041000033117  
52 8193141000033118

For peer review only

1 9201241000033110  
2 9201341000033117  
3 9201441000033111  
4 9201541000033112  
5 8558641000033118  
6 8558741000033110  
7 8558841000033117  
8 8558941000033113  
9 8559041000033116  
10 8559141000033117  
11 8581041000033111  
12 8581141000033110  
13 12603041000033110  
14 4148941000033117  
15 4149041000033114  
16 4149141000033113  
17 10974541000033115  
18 8199841000033110  
19 8199941000033119  
20 8200141000033112  
21 9850741000033111  
22 9851041000033116  
23 11799941000033116  
24 11800041000033110  
25 11800141000033114  
26 11800241000033119  
27 11807641000033115  
28 13126841000033113  
29 3994241000033113  
30 3994341000033115  
31 3994441000033114  
32 3994641000033111  
33 4892941000033118  
34 6113641000033117  
35 6113741000033114  
36 13058541000033116  
37 13738441000033115  
38 13738541000033119  
39 3347941000033110  
40 3348041000033113  
41 3348141000033112  
42 3348241000033117  
43 4161641000033112  
44 4161741000033115  
45 13715741000033113  
46 13715841000033115  
47 5264641000033115  
48 5264741000033112  
49 1441341000033115  
50 10012941000033117

For peer review only

1  
2 10013741000033113  
3 13130641000033112  
4 13130741000033115  
5 13130841000033113  
6 13130941000033117  
7 13131241000033119  
8 13131341000033112  
9 2660841000033114  
10 2660941000033118  
11 3050541000033119  
12 3050641000033118  
13 3177241000033114  
14 3177341000033116  
15 12039041000033111  
16 13788541000033113  
17 4522841000033118  
18 10488241000033116  
19 10488341000033114  
20 10488441000033115  
21 4507541000033111  
22 4507641000033112  
23 6067941000033113  
24 6068041000033111  
25 13117941000033112  
26 5832141000033118  
27 5832241000033113  
28 5832941000033116  
29 5833241000033118  
30 3926641000033110  
31 8123541000033118  
32 8123641000033117  
33 8123741000033114  
34 8123941000033112  
35 8124041000033114  
36 10487641000033119  
37 3943941000033112  
38 3944041000033114  
39 3949741000033111  
40 3949841000033118  
41 3949941000033114  
42 3950041000033117  
43 3950141000033118  
44 3950241000033113  
45 7739541000033119  
46 7739641000033118  
47 6529941000033113  
48 6530041000033117  
49 898441000033115  
50 898541000033119  
51 898441000033115

For peer review only

1  
2 898541000033119  
3 1115741000033111  
4 1119241000033115  
5 1130741000033110  
6 1357541000033112  
7 1361441000033110  
8 1361541000033111  
9 1361641000033112  
10 1361741000033115  
11 1668541000033113  
12 2859741000033112  
13 10266841000033117  
14 11664841000033116  
15 2146441000033119  
16 2146541000033118  
17 5506241000033117  
18 5900641000033111  
19 5900741000033119  
20 5900841000033112  
21 5900941000033116  
22 6137741000033111  
23 6137841000033118  
24 10213841000033110  
25 11072141000033115  
26 11072241000033110  
27 11072341000033117  
28 12389541000033113  
29 12389641000033114  
30 12389741000033117  
31 12398241000033119  
32 12575941000033114  
33 13948241000033112  
34 8559241000033112  
35  
36  
37  
38  
39  
40  
41  
42  
43  
44  
45  
46  
47  
48  
49  
50  
51  
52  
53  
54  
55  
56  
57  
58  
59  
60

For peer review only

1  
2 Term  
3 Cometriq 20mg capsules and Cometriq 80mg capsules (Ipsen Ltd)  
4 Doxorubicin Hydrochloride Injection 50 mg  
5 Etoposide Injection 20 mg/ml  
6 Mitobronitol Tablets 125 mg  
7 Cytarabine Injection 500 mg vial  
8 Thiotepa(With Sodium Chloride And Bicarbonate) Injection 15mg vial  
9 Cyclophosphamide Tablets 10 mg  
10 Docetaxel Solution For Infusion And Diluent 20 mg/2 ml vial  
11 Docetaxel Solution For Infusion And Diluent 80 mg/8 ml vial  
12 Cisplatin Injection 450 mg/vial  
13 Fludarabine Phosphate Injection 50 mg/vial  
14 Ifosfamide Injection 500 mg vial  
15 Cisplatin Injection 150 mg/vial  
16 Cisplatin Injection 500 micrograms/ml  
17 Etoposide Phosphate Injection 100 mg/vial  
18 Cabozantinib 20mg capsules and Cabozantinib 80mg capsules  
19 Cyclophosphamide Injection 1.07 g/vial  
20 Cisplatin Injection 1 mg/ml  
21 Cisplatin Injection 10 mg/vial  
22 Cyclophosphamide Injection 214 mg/vial  
23 Cyclophosphamide Injection 535 mg/vial  
24 Cytarabine Injection 100 mg/ml  
25 Cyclophosphamide Injection 107 mg/vial  
26 Cyclophosphamide Injection  
27 Melphalan Injection 100 mg vial  
28 Doxorubicin Hydrochloride Injection 10 mg  
29 Carmustine Injection 100 mg vial  
30 Oxaliplatin Powder For Solution For Injection 50 mg/vial  
31 Cyclophosphamide 50 Tablets 50 mg  
32 Cisplatin Injection 50 mg/vial  
33 Cytarabine Injection 20 mg/ml  
34 Paclitaxel Powder For Suspension For Infusion 100 mg vial  
35 Oxaliplatin Powder For Solution For Injection 100 mg/vial  
36 Giotrif 40mg tablets (Boehringer Ingelheim Ltd)  
37 Giotrif 20mg tablets (Boehringer Ingelheim Ltd)  
38 Giotrif 50mg tablets (Boehringer Ingelheim Ltd)  
39 Afatinib 30mg tablets  
40 Afatinib 20mg tablets  
41 Afatinib 50mg tablets  
42 Afatinib 40mg tablets  
43 Giotrif 30mg tablets (Boehringer Ingelheim Ltd)  
44 Alectinib 150mg capsules  
45 Alecensa 150mg capsules (Roche Products Ltd)  
46 Amsacrine 75mg/1.5ml solution for infusion ampoules and diluent  
47 Amsidine 75mg/1.5ml solution for infusion ampoules and diluent (Eurocept International bv)  
48 Arsenic 10mg/10ml solution for infusion ampoules  
49 Trisenox 10mg/10ml concentrate for solution for infusion ampoules (Teva UK Ltd)  
50 Asparaginase 10,000unit powder for solution for infusion vials  
51 Spectrila 10,000unit powder for concentrate for solution for infusion vials (medac UK)  
52  
53  
54  
55  
56  
57  
58  
59  
60



1 Axitinib 1mg tablets  
2 Inlyta 1mg tablets (Pfizer Ltd)  
3 Inlyta 5mg tablets (Pfizer Ltd)  
4 Axitinib 5mg tablets  
5 Azacitidine 100mg powder for suspension for injection vials  
6 Vidaza 100mg powder for suspension for injection vials (Celgene Ltd)  
7 Avastin 400mg/16ml solution for infusion vials (Roche Products Ltd)  
8 Bevacizumab 100mg/4ml solution for infusion vials  
9 Bevacizumab 400mg/16ml solution for infusion vials  
10 Avastin 100mg/4ml solution for infusion vials (Roche Products Ltd)  
11 Bexarotene 75mg capsules  
12 Targretin 75mg capsules (Eisai Ltd)  
13 Bortezomib 3.5mg powder for solution for injection vials  
14 Velcade 3.5mg powder for solution for injection vials (Janssen-Cilag Ltd)  
15 Bosutinib 100mg tablets  
16 Bosulif 500mg tablets (Pfizer Ltd)  
17 Bosulif 100mg tablets (Pfizer Ltd)  
18 Bosutinib 500mg tablets  
19 Adcetris 50mg powder for concentrate for solution for infusion vials (Takeda UK Ltd)  
20 Busulfan 60mg/10ml solution for infusion ampoules  
21 Busilvex 60mg/10ml concentrate for solution for infusion ampoules (Pierre Fabre Ltd)  
22 Myleran 2mg tablets (Aspen Pharma Trading Ltd)  
23 Busulfan 2mg tablets  
24 Cometriq 20mg capsules (Ipsen Ltd)  
25 Cabozantinib 40mg tablets  
26 Cabozantinib 20mg capsules  
27 Cabometyx 60mg tablets (Ipsen Ltd)  
28 Cabometyx 20mg tablets (Ipsen Ltd)  
29 Cabozantinib 20mg tablets  
30 Cabometyx 40mg tablets (Ipsen Ltd)  
31 Cabozantinib 60mg tablets  
32 Xeloda 500mg tablets (Roche Products Ltd)  
33 Capecitabine 300mg tablets  
34 Capecitabine 500mg tablets  
35 Capecitabine 150mg tablets  
36 Xeloda 150mg tablets (Roche Products Ltd)  
37 Carboplatin 150mg/15ml solution for infusion vials  
38 Carboplatin 600mg/60ml solution for infusion vials  
39 Carboplatin 50mg/5ml solution for infusion vials  
40 Paraplatin 50mg/5ml solution for infusion vials (Bristol-Myers Squibb Pharmaceuticals Ltd)  
41 Carboplatin 450mg/45ml solution for infusion vials  
42 Carfilzomib 60mg powder for solution for infusion vials  
43 Kyprolis 60mg powder for solution for infusion vials (Amgen Ltd)  
44 Carmustine 100mg powder and solvent for solution for injection vials  
45 Carmustine 7.7mg implant  
46 Gliadel 7.7mg implant (Eisai Ltd)  
47 BiCNU 100mg powder and solvent for solution for infusion vials (Bristol-Myers Squibb Pharmaceuticals Ltd)  
48 Catumaxomab 10micrograms/0.1ml solution for infusion pre-filled syringes  
49 Catumaxomab 50micrograms/0.5ml solution for infusion pre-filled syringes  
50 Removab 10micrograms/0.1ml concentrate for solution for infusion pre-filled syringes (Neovii Biotech GmbH)

1  
2 Removab 50micrograms/0.5ml concentrate for solution for infusion pre-filled syringes (Neovii Biotech GmbH)  
3 Zykadia 150mg capsules (Novartis Pharmaceuticals UK Ltd)  
4 Ceritinib 150mg capsules  
5 Erbitux 100mg/50ml solution for infusion vials (Merck Serono Ltd)  
6 Cetuximab 100mg/50ml solution for infusion vials  
7 Leukeran 2mg tablets (Aspen Pharma Trading Ltd)  
8 Leukeran 5mg tablets (GlaxoSmithKline UK Ltd)  
9 Chlorambucil 2mg tablets  
10 Chlorambucil 5mg tablets  
11 Chlormethine 10mg solution for injection vials  
12 Cisplatin 50mg powder for solution for infusion vials  
13 Cisplatin 100mg/100ml solution for infusion vials  
14 Cisplatin 10mg/10ml solution for infusion vials  
15 Cisplatin 50mg/50ml solution for infusion vials  
16 Cladribine 10mg tablets  
17 Cladribine 10mg/10ml solution for infusion vials  
18 Leustat 10mg/10ml solution for infusion vials (Janssen-Cilag Ltd)  
19 Litak 10mg/5ml solution for injection vials (Lipomed GmbH)  
20 Cladribine 10mg/5ml solution for injection vials  
21 Mavenclad 10mg tablets (Merck Serono Ltd)  
22 Evoltra 20mg/20ml concentrate for solution for infusion vials (Sanofi)  
23 Clofarabine 20mg/20ml solution for infusion vials  
24 Cotellic 20mg tablets (Roche Products Ltd)  
25 Cobimetinib 20mg tablets  
26 Crisantaspase 10,000unit powder for solution for injection vials  
27 Erwinase 10,000unit powder for solution for injection vials (EUSA Pharma Ltd)  
28 Xalkori 200mg capsules (Pfizer Ltd)  
29 Crizotinib 200mg capsules  
30 Crizotinib 250mg capsules  
31 Xalkori 250mg capsules (Pfizer Ltd)  
32 Endoxana 50mg tablets (Baxter Healthcare Ltd)  
33 Cyclophosphamide 50mg tablets  
34 Cyclophosphamide 2g powder for solution for injection vials  
35 Endoxana 500mg powder for solution for injection vials (Baxter Healthcare Ltd)  
36 Endoxana 1g powder for solution for injection vials (Baxter Healthcare Ltd)  
37 Cyclophosphamide 200mg powder for solution for injection vials  
38 Cyclophosphamide 500mg powder for solution for injection vials  
39 Cyclophosphamide 1g powder for solution for injection vials  
40 Cytarabine 2g/20ml solution for injection vials  
41 DepoCyte 50mg/5ml suspension for injection vials (Napp Pharmaceuticals Ltd)  
42 Cytarabine 500mg/5ml solution for injection vials  
43 Cytarabine 5g/50ml solution for infusion vials  
44 Cytarabine (liposomal) 50mg/5ml suspension for injection vials  
45 Cytarabine 4g/40ml solution for injection vials  
46 Cytarabine 1g/10ml solution for injection vials  
47 Cytarabine 100mg/1ml solution for injection vials  
48 Cytarabine 100mg/5ml solution for injection vials  
49 Cytarabine 500mg/25ml solution for injection vials  
50 Tafinlar 50mg capsules (Novartis Pharmaceuticals UK Ltd)  
51 Dabrafenib 75mg capsules

1 Tafinlar 75mg capsules (Novartis Pharmaceuticals UK Ltd)  
2 Dabrafenib 50mg capsules  
3 Dacarbazine 1g powder for solution for infusion vials  
4 DTIC-Dome 200mg powder for solution for injection vials (Bayer Plc)  
5 Dacarbazine 500mg powder for solution for infusion vials  
6 Dacarbazine 100mg powder for solution for injection vials  
7 Dacarbazine 200mg powder for solution for injection vials  
8 Dacarbazine 600mg powder for solution for infusion vials  
9 Dactinomycin 500microgram powder for solution for injection vials  
10 Cosmegen Lyovac 500microgram powder for solution for injection vials (Orphan Europe (UK) Ltd)  
11 Daratumumab 100mg/5ml solution for infusion vials  
12 Darzalex 400mg/20ml concentrate for solution for infusion vials (Janssen-Cilag Ltd)  
13 Daratumumab 400mg/20ml solution for infusion vials  
14 Darzalex 100mg/5ml concentrate for solution for infusion vials (Janssen-Cilag Ltd)  
15 Dasatinib 20mg tablets  
16 Dasatinib 50mg tablets  
17 Sprycel 20mg tablets (Bristol-Myers Squibb Pharmaceuticals Ltd)  
18 Sprycel 50mg tablets (Bristol-Myers Squibb Pharmaceuticals Ltd)  
19 Dasatinib 70mg tablets  
20 Sprycel 70mg tablets (Bristol-Myers Squibb Pharmaceuticals Ltd)  
21 Daunorubicin 20mg powder for solution for infusion vials  
22 DaunoXome 50mg emulsion for infusion vials (Galen Ltd)  
23 Daunorubicin (liposomal) 50mg emulsion for infusion vials  
24 Dacogen 50mg powder for concentrate for solution for infusion vials (Janssen-Cilag Ltd)  
25 Decitabine 50mg powder for solution for infusion vials  
26 Dexrazoxane 500mg powder and solvent for solution for infusion vials  
27 Dexrazoxane 500mg powder for solution for infusion vials  
28 Cardioxane 500mg powder for solution for infusion vials (Clinigen Healthcare Ltd)  
29 Savene 500mg powder for concentrate and solvent for solution for infusion vials (Clinigen Healthcare Ltd)  
30 Docetaxel 20mg/0.72ml solution for infusion vials and diluent  
31 Docetaxel 20mg/0.5ml solution for infusion vials and diluent  
32 Docetaxel 80mg/2ml solution for infusion vials and diluent  
33 Taxceus 80mg/4ml concentrate for solution for infusion vials (medac UK)  
34 Taxotere 20mg/0.5ml solution for infusion vials and diluent (Sanofi)  
35 Docetaxel 160mg/16ml solution for infusion vials  
36 Docetaxel 80mg/2.88ml solution for infusion vials and diluent  
37 Docetaxel 140mg/7ml solution for infusion vials  
38 Docetaxel 20mg/2ml solution for infusion vials  
39 Docetaxel 20mg/1ml solution for infusion vials  
40 Taxotere 80mg/4ml concentrate for solution for infusion vials (Sanofi)  
41 Docetaxel 160mg/8ml solution for infusion vials  
42 Taxceus 140mg/7ml concentrate for solution for infusion vials (medac UK)  
43 Taxotere 80mg/2ml solution for infusion vials and diluent (Sanofi)  
44 Taxotere 160mg/8ml concentrate for solution for infusion vials (Sanofi)  
45 Taxceus 20mg/1ml concentrate for solution for infusion vials (medac UK)  
46 Docetaxel 80mg/8ml solution for infusion vials  
47 Docetaxel 80mg/4ml solution for infusion vials  
48 Taxotere 20mg/1ml concentrate for solution for infusion vials (Sanofi)  
49 Doxorubicin 200mg/100ml solution for infusion vials  
50 Doxorubicin (liposomal) 50mg powder and solvent for suspension for infusion vials

- 1 Doxorubicin 50mg/25ml solution for injection Cytosafe vials (Pfizer Ltd)
- 2 Doxorubicin 10mg powder for solution for injection vials
- 3 Doxorubicin 10mg/5ml solution for injection vials
- 4 Doxorubicin 10mg/5ml solution for injection Cytosafe vials (Pfizer Ltd)
- 5 Doxorubicin Rapid Dissolution 50mg powder for solution for injection vials (Pfizer Ltd)
- 6 Doxorubicin 200mg/100ml solution for injection Cytosafe vials (Pfizer Ltd)
- 7 Doxorubicin 50mg/25ml solution for injection vials
- 8 Myocet 50mg powder and solvent for suspension for infusion vials (Teva UK Ltd)
- 9 Doxorubicin Rapid Dissolution 10mg powder for solution for injection vials (Pfizer Ltd)
- 10 Doxorubicin 50mg powder for solution for injection vials (medac UK)
- 11 Doxorubicin 50mg powder for solution for injection vials
- 12 Caelyx 20mg/10ml concentrate for solution for infusion vials (Janssen-Cilag Ltd)
- 13 Caelyx 50mg/25ml concentrate for solution for infusion vials (Janssen-Cilag Ltd)
- 14 Doxorubicin liposomal pegylated 50mg/25ml solution for infusion vials
- 15 Doxorubicin liposomal pegylated 20mg/10ml solution for infusion vials
- 16 Emlipiti 400mg powder for concentrate for solution for infusion vials (Bristol-Myers Squibb Pharmaceuticals L
- 17 Emlipiti 300mg powder for concentrate for solution for infusion vials (Bristol-Myers Squibb Pharmaceuticals L
- 18 Elotuzumab 400mg powder for solution for infusion vials
- 19 Elotuzumab 300mg powder for solution for infusion vials
- 20 Pharmorubicin 200mg/100ml solution for infusion Cytosafe vials (Pfizer Ltd)
- 21 Epirubicin 100mg/50ml solution for infusion vials
- 22 Pharmorubicin Rapid Dissolution 10mg powder for solution for injection vials (Pfizer Ltd)
- 23 Epirubicin 200mg/100ml solution for infusion vials
- 24 Epirubicin 50mg/25ml solution for injection vials
- 25 Epirubicin 10mg/5ml solution for injection vials
- 26 Epirubicin 20mg powder for solution for injection vials
- 27 Epirubicin 10mg powder for solution for injection vials
- 28 Pharmorubicin Rapid Dissolution 20mg powder for solution for injection vials (Pfizer Ltd)
- 29 Pharmorubicin 50mg/25ml solution for injection Cytosafe vials (Pfizer Ltd)
- 30 Pharmorubicin Rapid Dissolution 50mg powder for solution for injection vials (Pfizer Ltd)
- 31 Pharmorubicin 10mg/5ml solution for injection Cytosafe vials (Pfizer Ltd)
- 32 Epirubicin 50mg powder for solution for injection vials
- 33 Eribulin 880micrograms/2ml solution for injection vials
- 34 Halaven 0.88mg/2ml solution for injection vials (Eisai Ltd)
- 35 Erlotinib 100mg tablets
- 36 Erlotinib 150mg tablets
- 37 Tarceva 150mg tablets (Roche Products Ltd)
- 38 Tarceva 100mg tablets (Roche Products Ltd)
- 39 Estracyt 140mg capsules (Pfizer Ltd)
- 40 Estramustine 140mg capsules
- 41 Eposin 100mg/5ml concentrate for solution for infusion vials (medac UK)
- 42 Etoposide 100mg capsules
- 43 Eposin 500mg/25ml concentrate for solution for infusion vials (medac UK)
- 44 Etoposide 100mg/5ml solution for infusion vials
- 45 Vepesid 50mg capsules (Bristol-Myers Squibb Pharmaceuticals Ltd)
- 46 Vepesid 100mg capsules (Bristol-Myers Squibb Pharmaceuticals Ltd)
- 47 Etoposide 500mg/25ml solution for infusion vials
- 48 Etoposide 50mg capsules
- 49 Vepesid 100mg/5ml solution for infusion vials (Bristol-Myers Squibb Pharmaceuticals Ltd)
- 50 Etoposide 100mg powder for solution for injection vials

1 Etopophos 100mg powder for solution for injection vials (Bristol-Myers Squibb Pharmaceuticals Ltd)  
2 Everolimus 3mg dispersible tablets sugar free  
3 Everolimus 2.5mg tablets  
4 Votubia 3mg dispersible tablets (Novartis Pharmaceuticals UK Ltd)  
5 Everolimus 2mg dispersible tablets sugar free  
6 Afinitor 10mg tablets (Novartis Pharmaceuticals UK Ltd)  
7 Votubia 5mg dispersible tablets (Novartis Pharmaceuticals UK Ltd)  
8 Certican 0.5mg tablets (Novartis Pharmaceuticals UK Ltd)  
9 Everolimus 250microgram tablets  
10 Votubia 2mg dispersible tablets (Novartis Pharmaceuticals UK Ltd)  
11 Certican 0.75mg tablets (Novartis Pharmaceuticals UK Ltd)  
12 Afinitor 5mg tablets (Novartis Pharmaceuticals UK Ltd)  
13 Votubia 5mg tablets (Novartis Pharmaceuticals UK Ltd)  
14 Everolimus 500microgram tablets  
15 Everolimus 5mg tablets  
16 Certican 0.25mg tablets (Novartis Pharmaceuticals UK Ltd)  
17 Everolimus 5mg dispersible tablets sugar free  
18 Afinitor 2.5mg tablets (Novartis Pharmaceuticals UK Ltd)  
19 Everolimus 10mg tablets  
20 Votubia 10mg tablets (Novartis Pharmaceuticals UK Ltd)  
21 Votubia 2.5mg tablets (Novartis Pharmaceuticals UK Ltd)  
22 Everolimus 750microgram tablets  
23 Fludarabine phosphate 50mg/2ml solution for injection vials  
24 Fludarabine phosphate 50mg powder for solution for injection vials  
25 Fludarabine phosphate 10mg tablets  
26 Fludara 10mg tablets (Sanofi)  
27 Fludara 50mg powder for solution for injection vials (Sanofi)  
28 Fluorouracil 250mg capsules  
29 Fluorouracil 2.5g/50ml solution for infusion vials  
30 Fluorouracil 2.5g/100ml solution for infusion vials  
31 Fluorouracil 5g/100ml solution for infusion vials  
32 Fluorouracil 1g/20ml solution for injection vials  
33 Fluorouracil 500mg/10ml solution for injection vials  
34 Fluorouracil 250mg/10ml solution for injection vials  
35 Fluorouracil 500mg/20ml solution for injection vials  
36 Iressa 250mg tablets (AstraZeneca UK Ltd)  
37 Gefitinib 250mg tablets  
38 Gemcitabine 1.2g/120ml infusion bags  
39 Gemzar 200mg powder for solution for infusion vials (Eli Lilly and Company Ltd)  
40 Gemcitabine 2g powder for solution for infusion vials  
41 Gemcitabine 200mg/5ml solution for infusion vials  
42 Gemcitabine 200mg powder for solution for infusion vials  
43 Gemcitabine 1.8g/180ml infusion bags  
44 Gemcitabine 1.6g/160ml infusion bags  
45 Gemcitabine 2g/50ml solution for infusion vials  
46 Gemcitabine 1.5g powder for solution for infusion vials  
47 Gemcitabine 1g powder for solution for infusion vials  
48 Gemcitabine 2.2g/220ml infusion bags  
49 Gemzar 1g powder for solution for infusion vials (Eli Lilly and Company Ltd)  
50 Gemcitabine 1g/25ml solution for infusion vials

1 Gemcitabine 2g/200ml infusion bags  
2  
3 Teysuno 15mg/4.35mg/11.8mg capsules (Nordic Pharma Ltd)  
4 Teysuno 20mg/5.8mg/15.8mg capsules (Nordic Pharma Ltd)  
5 Hydroxycarbamide 500mg capsules  
6 Hydrea 500mg capsules (Bristol-Myers Squibb Pharmaceuticals Ltd)  
7 Imbruvica 140mg capsules (Janssen-Cilag Ltd)  
8 Ibrutinib 140mg capsules  
9  
10 Idarubicin 5mg powder for solution for injection vials  
11 Idarubicin 10mg powder for solution for injection vials  
12 Zavedos 10mg powder for solution for injection vials (Pfizer Ltd)  
13 Zavedos 10mg capsules (Pfizer Ltd)  
14 Zavedos 5mg capsules (Pfizer Ltd)  
15 Idarubicin 5mg capsules  
16 Zavedos 25mg capsules (Pfizer Ltd)  
17 Idarubicin 25mg capsules  
18 Zavedos 5mg powder for solution for injection vials (Pfizer Ltd)  
19 Idarubicin 10mg capsules  
20 Zydelig 150mg tablets (Gilead Sciences International Ltd)  
21 Mitoxana 2g powder for solution for injection vials (Baxter Healthcare Ltd)  
22 Ifosfamide 1g powder for solution for injection vials  
23 Mitoxana 1g powder for solution for injection vials (Baxter Healthcare Ltd)  
24 Ifosfamide 2g powder for solution for injection vials  
25 Glivec 400mg tablets (Novartis Pharmaceuticals UK Ltd)  
26 Imatinib 400mg tablets  
27 Imatinib 100mg tablets  
28 Glivec 100mg tablets (Novartis Pharmaceuticals UK Ltd)  
29 Yervoy 200mg/40ml concentrate for solution for infusion vials (Bristol-Myers Squibb Pharmaceuticals Ltd)  
30 Yervoy 50mg/10ml concentrate for solution for infusion vials (Bristol-Myers Squibb Pharmaceuticals Ltd)  
31 Irinotecan 500mg/25ml solution for infusion vials  
32 Irinotecan 50mg/10ml solution for infusion vials  
33 Campto 100mg/5ml concentrate for solution for infusion vials (Pfizer Ltd)  
34 Irinotecan 300mg/15ml solution for infusion vials  
35 Irinotecan 40mg/2ml solution for infusion vials  
36 Onivyde 50mg/10ml concentrate for solution for infusion vials (Baxalta UK Ltd)  
37 Campto 300mg/15ml concentrate for solution for infusion vials (Pfizer Ltd)  
38 Irinotecan 100mg/5ml solution for infusion vials  
39 Campto 40mg/2ml concentrate for solution for infusion vials (Pfizer Ltd)  
40 Ninlaro 4mg capsules (Takeda UK Ltd)  
41 Ixazomib 3mg capsules  
42 Ixazomib 4mg capsules  
43 Ninlaro 3mg capsules (Takeda UK Ltd)  
44 Ninlaro 2.3mg capsules (Takeda UK Ltd)  
45 Ixazomib 2.3mg capsules  
46 Lapatinib 250mg tablets  
47 Tyverb 250mg tablets (Novartis Pharmaceuticals UK Ltd)  
48 Revlimid 25mg capsules (Celgene Ltd)  
49 Lenalidomide 25mg capsules  
50 Revlimid 2.5mg capsules (Celgene Ltd)  
51 Revlimid 20mg capsules (Celgene Ltd)  
52 Lenalidomide 5mg capsules



1 Revlimid 15mg capsules (Celgene Ltd)  
2 Lenalidomide 2.5mg capsules  
3 Lenalidomide 7.5mg capsules  
4 Lenalidomide 10mg capsules  
5 Lenalidomide 20mg capsules  
6 Lenalidomide 15mg capsules  
7 Revlimid 10mg capsules (Celgene Ltd)  
8 Revlimid 5mg capsules (Celgene Ltd)  
9 Revlimid 7.5mg capsules (Celgene Ltd)  
10 Lenvatinib 4mg capsules  
11 Kispalyx 10mg capsules (Eisai Ltd)  
12 Kispalyx 4mg capsules (Eisai Ltd)  
13 Lenvima 4mg capsules (Eisai Ltd)  
14 Lenvima 10mg capsules (Eisai Ltd)  
15 Lenvatinib 10mg capsules  
16 Lomustine 10mg capsules  
17 Lomustine 40mg capsules  
18 Melphalan 5mg tablets  
19 Alkeran 2mg tablets (Aspen Pharma Trading Ltd)  
20 Alkeran 5mg tablets (GlaxoSmithKline UK Ltd)  
21 Melphalan 2mg tablets  
22 Melphalan 50mg powder and solvent for solution for injection vials  
23 Alkeran 50mg powder and solvent for solution for injection vials (Aspen Pharma Trading Ltd)  
24 Mesna 400mg tablets  
25 Mesna 600mg tablets  
26 Uromitexan 600mg tablets (Baxter Healthcare Ltd)  
27 Mesna 400mg/4ml solution for injection ampoules  
28 Mesna 1g/10ml solution for injection ampoules  
29 Uromitexan 400mg tablets (Baxter Healthcare Ltd)  
30 Uromitexan 400mg/4ml solution for injection ampoules (Baxter Healthcare Ltd)  
31 Mitomycin-C Kyowa 10mg powder for solution for injection vials (Kyowa Kirin Ltd)  
32 Mitomycin-C Kyowa 2mg powder for solution for injection vials (Kyowa Kirin Ltd)  
33 Mitomycin-C Kyowa 20mg powder for solution for injection vials (Kyowa Kirin Ltd)  
34 Mitomycin 10mg powder for solution for injection vials  
35 Mitomycin-C Kyowa 40mg powder for solution for injection vials (Kyowa Kirin Ltd)  
36 Mitomycin 20mg powder for solution for injection vials  
37 Mitomycin 2mg powder for solution for injection vials  
38 Mitomycin 40mg powder for solution for injection vials  
39 Lysodren 500mg tablets (HRA Pharma UK Ltd)  
40 Mitotane 500mg tablets  
41 Onkotrone 25mg/12.5ml solution for infusion vials (Baxter Healthcare Ltd)  
42 Mitoxantrone 25mg/12.5ml solution for infusion vials  
43 Mitoxantrone 30mg/15ml solution for infusion vials  
44 Onkotrone 30mg/15ml solution for infusion vials (ASTA Medica Ltd)  
45 Mitoxantrone 20mg/10ml solution for infusion vials  
46 Onkotrone 20mg/10ml solution for infusion vials (Baxter Healthcare Ltd)  
47 Portrazza 800mg/50ml concentrate for solution for infusion vials (Eli Lilly and Company Ltd)  
48 Nectinumab 800mg/50ml solution for infusion vials  
49 Nelarabine 250mg/50ml solution for infusion vials  
50 Atriance 250mg/50ml solution for infusion vials (Novartis Pharmaceuticals UK Ltd)

- 1 Nilotinib 200mg capsules
- 2 Tasigna 200mg capsules (Novartis Pharmaceuticals UK Ltd)
- 3 Vargatef 100mg capsules (Boehringer Ingelheim Ltd)
- 4 Vargatef 150mg capsules (Boehringer Ingelheim Ltd)
- 5 Nintedanib 100mg capsules
- 6 Nintedanib 150mg capsules
- 7 Opdivo 40mg/4ml concentrate for solution for infusion vials (Bristol-Myers Squibb Pharmaceuticals Ltd)
- 8 Nivolumab 40mg/4ml solution for infusion vials
- 9 Opdivo 100mg/10ml concentrate for solution for infusion vials (Bristol-Myers Squibb Pharmaceuticals Ltd)
- 10 Nivolumab 100mg/10ml solution for infusion vials
- 11 Lynparza 50mg capsules (AstraZeneca UK Ltd)
- 12 Olaparib 50mg capsules
- 13 Lartruvo 190mg/19ml concentrate for solution for infusion vials (Eli Lilly and Company Ltd)
- 14 Olaratumab 190mg/19ml solution for infusion vials
- 15 Lartruvo 500mg/50ml concentrate for solution for infusion vials (Eli Lilly and Company Ltd)
- 16 Olaratumab 500mg/50ml solution for infusion vials
- 17 Tagrisso 80mg tablets (AstraZeneca UK Ltd)
- 18 Osimertinib 80mg tablets
- 19 Osimertinib 40mg tablets
- 20 Tagrisso 40mg tablets (AstraZeneca UK Ltd)
- 21 Eloxatin 200mg/40ml concentrate for solution for infusion vials (Sanofi)
- 22 Eloxatin 50mg powder for solution for infusion vials (Sanofi)
- 23 Oxaliplatin 100mg/20ml solution for infusion vials
- 24 Oxaliplatin 50mg powder for solution for infusion vials
- 25 Oxaliplatin 50mg/10ml solution for infusion vials
- 26 Eloxatin 50mg/10ml concentrate for solution for infusion vials (Sanofi)
- 27 Oxaliplatin 100mg powder for solution for infusion vials
- 28 Oxaliplatin 150mg powder for solution for infusion vials
- 29 Eloxatin 100mg powder for solution for infusion vials (Sanofi)
- 30 Oxaliplatin 200mg/40ml solution for infusion vials
- 31 Eloxatin 100mg/20ml concentrate for solution for infusion vials (Sanofi)
- 32 Taxol 100mg/16.7ml solution for infusion vials (Bristol-Myers Squibb Pharmaceuticals Ltd)
- 33 Paclitaxel 30mg/5ml solution for infusion vials
- 34 Paclitaxel 300mg/50ml solution for infusion vials
- 35 Taxol 30mg/5ml solution for infusion vials (Bristol-Myers Squibb Pharmaceuticals Ltd)
- 36 Paclitaxel 150mg/25ml solution for infusion vials
- 37 Taxol 150mg/25ml solution for infusion vials (Bristol-Myers Squibb Pharmaceuticals Ltd)
- 38 Paclitaxel 100mg/16.7ml solution for infusion vials
- 39 Paclitaxel albumin 100mg powder for suspension for infusion vials
- 40 Abraxane 100mg powder for suspension for infusion vials (Celgene Ltd)
- 41 Palbociclib 125mg capsules
- 42 Ibrance 75mg capsules (Pfizer Ltd)
- 43 Ibrance 100mg capsules (Pfizer Ltd)
- 44 Palbociclib 75mg capsules
- 45 Ibrance 125mg capsules (Pfizer Ltd)
- 46 Palbociclib 100mg capsules
- 47 Palifermin 6.25mg powder for solution for injection vials
- 48 Kepivance 6.25mg powder for solution for injection vials (Swedish Orphan Biovitrum Ltd)
- 49 Vectibix 100mg/5ml concentrate for solution for infusion vials (Amgen Ltd)
- 50 Panitumumab 100mg/5ml solution for infusion vials



1 Panitumumab 400mg/20ml solution for infusion vials  
2 Vectibix 400mg/20ml concentrate for solution for infusion vials (Amgen Ltd)  
3 Farydak 10mg capsules (Novartis Pharmaceuticals UK Ltd)  
4 Farydak 20mg capsules (Novartis Pharmaceuticals UK Ltd)  
5 Panobinostat 20mg capsules  
6 Farydak 15mg capsules (Novartis Pharmaceuticals UK Ltd)  
7 Panobinostat 10mg capsules  
8 Panobinostat 15mg capsules  
9 Votrient 400mg tablets (Novartis Pharmaceuticals UK Ltd)  
10 Pazopanib 400mg tablets  
11 Pazopanib 200mg tablets  
12 Votrient 200mg tablets (Novartis Pharmaceuticals UK Ltd)  
13 Pegaspargase 3,750units/5ml solution for injection vials  
14 Oncaspar 3,750units/5ml solution for injection vials (Imported (United States))  
15 Pembrolizumab 50mg powder for solution for infusion vials  
16 Keytruda 50mg powder for concentrate for solution for infusion vials (Merck Sharp & Dohme Ltd)  
17 Alimta 500mg powder for concentrate for solution for infusion vials (Eli Lilly and Company Ltd)  
18 Pemetrexed 100mg powder for solution for infusion vials  
19 Alimta 100mg powder for concentrate for solution for infusion vials (Eli Lilly and Company Ltd)  
20 Pemetrexed 500mg powder for solution for infusion vials  
21 Nipent 10mg powder for solution for injection vials (Hospira UK Ltd)  
22 Pentostatin 10mg powder for solution for injection vials  
23 Perjeta 420mg/14ml concentrate for solution for infusion vials (Roche Products Ltd)  
24 Ponatinib 15mg tablets  
25 Iclusig 15mg tablets (Incyte Biosciences UK Ltd)  
26 Iclusig 45mg tablets (Incyte Biosciences UK Ltd)  
27 Ponatinib 45mg tablets  
28 Porfimer sodium 75mg powder for solution for injection vials  
29 Photofrin 15mg powder for solution for injection vials (Axcen Pharma Inc)  
30 Photofrin 75mg powder for solution for injection vials (Pinnacle Biologics BV)  
31 Porfimer sodium 15mg powder for solution for injection vials  
32 Procarbazine 50mg capsules  
33 Tomudex 2mg powder for solution for infusion vials (Hospira UK Ltd)  
34 Raltitrexed 2mg powder for solution for infusion vials  
35 Ramucirumab 100mg/10ml solution for infusion vials  
36 Cyramza 100mg/10ml concentrate for solution for infusion vials (Eli Lilly and Company Ltd)  
37 Cyramza 500mg/50ml concentrate for solution for infusion vials (Eli Lilly and Company Ltd)  
38 Ramucirumab 500mg/50ml solution for infusion vials  
39 Razoxane 125mg tablets  
40 Stivarga 40mg tablets (Bayer Plc)  
41 Regorafenib 40mg tablets  
42 Jakavi 5mg tablets (Novartis Pharmaceuticals UK Ltd)  
43 Jakavi 15mg tablets (Novartis Pharmaceuticals UK Ltd)  
44 Ruxolitinib 15mg tablets  
45 Ruxolitinib 5mg tablets  
46 Jakavi 20mg tablets (Novartis Pharmaceuticals UK Ltd)  
47 Ruxolitinib 20mg tablets  
48 Nexavar 200mg tablets (Bayer Plc)  
49 Sorafenib 200mg tablets  
50 Sunitinib 50mg capsules

1 Sunitinib 25mg capsules  
2 Sunitinib 12.5mg capsules  
3 Sutent 50mg capsules (Pfizer Ltd)  
4 Sutent 12.5mg capsules (Pfizer Ltd)  
5 Sutent 25mg capsules (Pfizer Ltd)  
6 Imlygic 1million plaque forming units/1ml solution for injection vials (Amgen Ltd)  
7 Imlygic 100million plaque forming units/1ml solution for injection vials (Amgen Ltd)  
8 Talimogene laherparepvec 1million plaque forming units/1ml solution for injection vials  
9 Talimogene laherparepvec 100million plaque forming units/1ml solution for injection vials  
10 Foscan 20mg/5ml solution for injection vials (Biotech Pharma Ltd)  
11 Temoporfin 20mg/5ml solution for injection vials  
12 Temomedac 100mg capsules (medac UK)  
13 Temozolomide 250mg capsules  
14 Temodal 5mg capsules (Merck Sharp & Dohme Ltd)  
15 Temodal 180mg capsules (Merck Sharp & Dohme Ltd)  
16 Temozolomide 20mg capsules  
17 Temozolomide 180mg capsules  
18 Temozolomide 140mg capsules  
19 Temomedac 5mg capsules (medac UK)  
20 Temomedac 140mg capsules (medac UK)  
21 Temomedac 250mg capsules (medac UK)  
22 Temodal 20mg capsules (Merck Sharp & Dohme Ltd)  
23 Temodal 250mg capsules (Merck Sharp & Dohme Ltd)  
24 Temomedac 20mg capsules (medac UK)  
25 Temodal 140mg capsules (Merck Sharp & Dohme Ltd)  
26 Temomedac 180mg capsules (medac UK)  
27 Temodal 100mg capsules (Merck Sharp & Dohme Ltd)  
28 Temozolomide 5mg capsules  
29 Temozolomide 100mg capsules  
30 Temsirolimus 30mg/1.2ml solution for infusion vials and diluent  
31 Torisel 30mg/1.2ml concentrate for solution for infusion vials and diluent (Pfizer Ltd)  
32 Thiotepa 15mg powder for solution for infusion vials  
33 Tepadina 15mg powder for concentrate for solution for infusion vials (Adienne Pharma & Biotech)  
34 Thiotepa 100mg powder for solution for infusion vials  
35 Thiotepa 15mg powder for solution for injection vials  
36 Tepadina 100mg powder for concentrate for solution for infusion vials (Adienne Pharma & Biotech)  
37 Tioguanine 40mg tablets  
38 Lanvis 40mg tablets (Aspen Pharma Trading Ltd)  
39 Trifluridine 15mg / Tipiracil 6.14mg tablets  
40 Trifluridine 20mg / Tipiracil 8.19mg tablets  
41 Lonsurf 20mg/8.19mg tablets (Servier Laboratories Ltd)  
42 Lonsurf 15mg/6.14mg tablets (Servier Laboratories Ltd)  
43 Potactasol 1mg powder for concentrate for solution for infusion vials (Actavis UK Ltd)  
44 Topotecan 4mg powder for solution for infusion vials  
45 Topotecan 4mg/4ml solution for infusion vials  
46 Topotecan 1mg capsules  
47 Topotecan 250microgram capsules  
48 Hycamtin 1mg capsules (Novartis Pharmaceuticals UK Ltd)  
49 Hycamtin 1mg powder for concentrate for solution for infusion vials (Novartis Pharmaceuticals UK Ltd)  
50 Potactasol 4mg powder for concentrate for solution for infusion vials (Actavis UK Ltd)

1 Topotecan 1mg powder for solution for infusion vials  
2 Hycamtin 4mg powder for concentrate for solution for infusion vials (Novartis Pharmaceuticals UK Ltd)  
3 Topotecan 1mg/1ml solution for infusion vials  
4 Hycamtin 0.25mg capsules (Novartis Pharmaceuticals UK Ltd)  
5 Mekinist 2mg tablets (Novartis Pharmaceuticals UK Ltd)  
6 Trametinib 500micrograms tablets  
7 Mekinist 0.5mg tablets (Novartis Pharmaceuticals UK Ltd)  
8 Trametinib 2mg tablets  
9 Herceptin 150mg powder for solution for infusion vials (Roche Products Ltd)  
10 Trastuzumab 150mg powder for solution for infusion vials  
11 Trastuzumab emtansine 160mg powder for solution for infusion vials  
12 Kadcylla 160mg powder for concentrate for solution for infusion vials (Roche Products Ltd)  
13 Trastuzumab emtansine 100mg powder for solution for infusion vials  
14 Kadcylla 100mg powder for concentrate for solution for infusion vials (Roche Products Ltd)  
15 Treosulfan 5g powder for solution for injection vials  
16 Treosulfan 250mg capsules  
17 Treosulfan 1g powder for solution for injection vials  
18 Vesanoind 10mg capsules (Intrapharm Laboratories Ltd)  
19 Tretinoin 10mg capsules  
20 Vandetanib 100mg tablets  
21 Caprelsa 300mg tablets (Genzyme Therapeutics Ltd)  
22 Caprelsa 100mg tablets (Genzyme Therapeutics Ltd)  
23 Vandetanib 300mg tablets  
24 Vemurafenib 240mg tablets  
25 Zelboraf 240mg tablets (Roche Products Ltd)  
26 Venetoclax 100mg tablets  
27 Venclyxto 50mg tablets (AbbVie Ltd)  
28 Venetoclax 10mg tablets  
29 Venetoclax 50mg tablets  
30 Venclyxto 10mg tablets (AbbVie Ltd)  
31 Venclyxto 100mg tablets (AbbVie Ltd)  
32 Velbe 10mg powder for solution for injection vials (Eli Lilly and Company Ltd)  
33 Vincristine 5mg/5ml solution for injection vials  
34 Vincristine 1mg/1ml solution for injection vials  
35 Vincristine 2mg/2ml solution for injection vials  
36 Oncovin 1mg/1ml solution for injection vials (Eli Lilly and Company Ltd)  
37 Vindesine 5mg powder for solution for injection vials  
38 Eldisine 5mg powder for solution for injection vials (Thornton & Ross Ltd)  
39 Vinorelbine 50mg/5ml solution for infusion vials  
40 Vinorelbine 10mg/1ml solution for infusion vials  
41 Navelbine 80mg capsules (Pierre Fabre Ltd)  
42 Vinorelbine 30mg capsules  
43 Vinorelbine 20mg capsules  
44 Navelbine 50mg/5ml concentrate for solution for infusion vials (Pierre Fabre Ltd)  
45 Navelbine 30mg capsules (Pierre Fabre Ltd)  
46 Vinorelbine 80mg capsules  
47 Navelbine 20mg capsules (Pierre Fabre Ltd)  
48 Navelbine 10mg/1ml concentrate for solution for infusion vials (Pierre Fabre Ltd)  
49 Vismodegib 150mg capsules  
50 Erivedge 150mg capsules (Roche Products Ltd)

1 Erivedge 150mg capsules (Roche Products Ltd)  
2 radical radiotherapy  
3  
4 Adalimumab 40mg/0.8ml solution for injection pre-filled syringes  
5 Humira 40mg/0.8ml solution for injection pre-filled syringes (AbbVie Ltd)  
6 Adalimumab 40mg/0.8ml solution for injection pre-filled disposable devices  
7 Humira 40mg/0.8ml solution for injection pre-filled pens (AbbVie Ltd)  
8 Adalimumab 40mg/0.8ml solution for injection vials  
9 Humira 40mg/0.8ml solution for injection vials (AbbVie Ltd)  
10 Adalimumab 40mg/0.4ml solution for injection pre-filled syringes  
11 Adalimumab 40mg/0.4ml solution for injection pre-filled disposable devices  
12 Humira 40mg/0.4ml solution for injection pre-filled syringes (AbbVie Ltd)  
13 Humira 40mg/0.4ml solution for injection pre-filled pens (AbbVie Ltd)  
14 Adalimumab 20mg/0.2ml solution for injection pre-filled syringes  
15 Humira 20mg/0.2ml solution for injection pre-filled syringes (AbbVie Ltd)  
16 Amgevita 40mg/0.8ml solution for injection pre-filled pens (Amgen Ltd)  
17 Amgevita 40mg/0.8ml solution for injection pre-filled syringes (Amgen Ltd)  
18 Adalimumab 20mg/0.4ml solution for injection pre-filled syringes  
19 Amgevita 20mg/0.4ml solution for injection pre-filled syringes (Amgen Ltd)  
20 Adalimumab 80mg/0.8ml solution for injection pre-filled disposable devices  
21 Adalimumab 80mg/0.8ml solution for injection pre-filled syringes  
22 Humira 80mg/0.8ml solution for injection pre-filled pens (AbbVie Ltd)  
23 Humira 80mg/0.8ml solution for injection pre-filled syringes (AbbVie Ltd)  
24 Hyrimoz 40mg/0.8ml solution for injection pre-filled pens (Sandoz Ltd)  
25 Hyrimoz 40mg/0.8ml solution for injection pre-filled syringes (Sandoz Ltd)  
26 Imraldi 40mg/0.8ml solution for injection pre-filled pens (Biogen Idec Ltd)  
27 Imraldi 40mg/0.8ml solution for injection pre-filled syringes (Biogen Idec Ltd)  
28 Idacio 40mg/0.8ml solution for injection vials (Fresenius Kabi Ltd)  
29 Idacio 40mg/0.8ml solution for injection pre-filled pens (Fresenius Kabi Ltd)  
30 Idacio 40mg/0.8ml solution for injection pre-filled syringes (Fresenius Kabi Ltd)  
31 Etanercept 25mg powder and solvent for solution for injection vials  
32 Enbrel 25mg powder and solvent for solution for injection vials (Pfizer Ltd)  
33 Etanercept 50mg powder and solvent for solution for injection vials  
34 Enbrel 50mg powder and solvent for solution for injection vials (Wyeth Pharmaceuticals)  
35 Etanercept 50mg/1ml solution for injection pre-filled syringes  
36 Enbrel 50mg/1ml solution for injection pre-filled syringes (Pfizer Ltd)  
37 Enbrel Paediatric 25mg powder and solvent for solution for injection vials (Pfizer Ltd)  
38 Etanercept 25mg/0.5ml solution for injection pre-filled syringes  
39 Enbrel 25mg/0.5ml solution for injection pre-filled syringes (Pfizer Ltd)  
40 Etanercept 50mg/1ml solution for injection pre-filled disposable devices  
41 Enbrel 50mg/1ml solution for injection pre-filled MyClic pens (Pfizer Ltd)  
42 Etanercept 10mg powder and solvent for solution for injection vials  
43 Enbrel Paediatric 10mg powder and solvent for solution for injection vials (Pfizer Ltd)  
44 Benepali 50mg/1ml solution for injection pre-filled pens (Biogen Idec Ltd)  
45 Benepali 50mg/1ml solution for injection pre-filled syringes (Biogen Idec Ltd)  
46 Benepali 25mg/0.5ml solution for injection pre-filled syringes (Biogen Idec Ltd)  
47 Erelzi 25mg/0.5ml solution for injection pre-filled syringes (Sandoz Ltd)  
48 Erelzi 50mg/1ml solution for injection pre-filled syringes (Sandoz Ltd)  
49 Erelzi 50mg/1ml solution for injection pre-filled pens (Sandoz Ltd)  
50 Etanercept 25mg/0.5ml solution for injection pre-filled disposable devices  
51 Enbrel 25mg/0.5ml solution for injection pre-filled MyClic pens (Pfizer Ltd)

1  
2 Infliximab 100mg powder for solution for infusion vials  
3 Infliximab 120mg/1ml solution for injection pre-filled disposable devices  
4 Infliximab 120mg/1ml solution for injection pre-filled syringes  
5 Remicade 100mg powder for concentrate for solution for infusion vials (Merck Sharp & Dohme (UK) Ltd)  
6 Remsima 100mg powder for concentrate for solution for infusion vials (Celltrion Healthcare UK Ltd)  
7 Flixabi 100mg powder for concentrate for solution for infusion vials (Biogen Idec Ltd)  
8 Zessly 100mg powder for concentrate for solution for infusion vials (Sandoz Ltd)  
9 Remsima 120mg/1ml solution for injection pre-filled pens (Celltrion Healthcare UK Ltd)  
10 Remsima 120mg/1ml solution for injection pre-filled syringes (Celltrion Healthcare UK Ltd)  
11 Simponi 50mg/0.5ml solution for injection pre-filled syringes (Merck Sharp & Dohme (UK) Ltd)  
12 Simponi 50mg/0.5ml solution for injection pre-filled pens (Merck Sharp & Dohme (UK) Ltd)  
13 Simponi 100mg/1ml solution for injection pre-filled pens (Merck Sharp & Dohme (UK) Ltd)  
14 Golimumab 100mg/1ml solution for injection pre-filled disposable devices  
15 Golimumab 50mg/0.5ml solution for injection pre-filled disposable devices  
16 Golimumab 50mg/0.5ml solution for injection pre-filled syringes  
17 Cimzia 200mg/1ml solution for injection pre-filled syringes (UCB Pharma Ltd)  
18 Certolizumab pegol 200mg/1ml solution for injection pre-filled syringes  
19 Certolizumab pegol 200mg/1ml solution for injection pre-filled disposable devices  
20 Cimzia 200mg/1ml solution for injection pre-filled pens (UCB Pharma Ltd)  
21 Certolizumab pegol 200mg/1ml solution for injection cartridges  
22 Cimzia 200mg/1ml solution for injection in a dose-dispenser cartridge (UCB Pharma Ltd)  
23 Abatacept 250mg powder for solution for infusion vials  
24 Abatacept 125mg/1ml solution for injection pre-filled syringes  
25 Abatacept 125mg/1ml solution for injection pre-filled disposable devices  
26 Abatacept 50mg/0.4ml solution for injection pre-filled syringes  
27 Abatacept 87.5mg/0.7ml solution for injection pre-filled syringes  
28 Orenzia 250mg powder for concentrate for solution for infusion vials (Bristol-Myers Squibb Pharmaceuticals Lt  
29 Orenzia 125mg/1ml solution for injection pre-filled syringes (Bristol-Myers Squibb Pharmaceuticals Ltd)  
30 Orenzia ClickJect 125mg/1ml solution for injection pre-filled pens (Bristol-Myers Squibb Pharmaceuticals Ltd)  
31 Orenzia 50mg/0.4ml solution for injection pre-filled syringes (Bristol-Myers Squibb Pharmaceuticals Ltd)  
32 Olaparib 50mg capsules  
33 Olaparib 100mg tablets  
34 Olaparib 150mg tablets  
35 Lynparza 150mg tablets (AstraZeneca UK Ltd)  
36 Lynparza 100mg tablets (AstraZeneca UK Ltd)  
37 Rucaparib 200mg tablets  
38 Rucaparib 250mg tablets  
39 Rucaparib 300mg tablets  
40 Rubraca 300mg tablets (Clovis Oncology UK Ltd)  
41 Niraparib 100mg capsules  
42 Zejula 100mg capsules (GlaxoSmithKline UK Ltd)  
43 Talazoparib 1mg capsules  
44 Talazoparib 250microgram capsules  
45 Afatinib 20mg tablets  
46 Afatinib 30mg tablets  
47 Afatinib 40mg tablets  
48 Afatinib 50mg tablets  
49 Giotrif 40mg tablets (Boehringer Ingelheim Ltd)  
50 Axitinib 1mg tablets  
51 Axitinib 5mg tablets

1 Axitinib 3mg tablets  
2 Axitinib 7mg tablets  
3 Inlyta 7mg tablets (Pfizer Ltd)  
4 Inlyta 3mg tablets (Pfizer Ltd)  
5 \*Abnoba Viscum Fraxini Injection 20 mg/1 ml ampoule  
6 \*Abnoba Viscum Fraxini Injection 2 mg/1 ml ampoule  
7 \*Abnoba Viscum Fraxini Injection 0.2 mg/1 ml ampoule  
8 \*Abnoba Viscum Fraxini Injection 0.02 mg/1 ml ampoule  
9 \*Abnoba Viscum Fraxini Injection D6, 1 ml ampoule  
10 \*Abnoba Viscum Fraxini Injection D10, 1 ml ampoule  
11 Bosutinib 100mg tablets  
12 Bosutinib 500mg tablets  
13 Bosutinib 400mg tablets  
14 Cetuximab 100mg/20ml solution for infusion vials  
15 Cetuximab 500mg/100ml solution for infusion vials  
16 Erbitux 100mg/20ml solution for infusion vials (Merck Serono Ltd)  
17 Cobimetinib 20mg tablets  
18 Crizotinib 200mg capsules  
19 Crizotinib 250mg capsules  
20 Xalkori 250mg capsules (Pfizer Ltd)  
21 Cabozantinib 20mg capsules  
22 Cometriq 20mg capsules (Ipsen Ltd)  
23 Cabozantinib 20mg tablets  
24 Cabozantinib 40mg tablets  
25 Cabometyx 20mg tablets (Ipsen Ltd)  
26 Cabometyx 40mg tablets (Ipsen Ltd)  
27 Cabozantinib 60mg tablets  
28 Dacomitinib 30mg tablets  
29 Dasatinib 20mg tablets  
30 Dasatinib 50mg tablets  
31 Dasatinib 70mg tablets  
32 Sprycel 50mg tablets (Bristol-Myers Squibb Pharmaceuticals Ltd)  
33 Dasatinib 100mg tablets  
34 Dasatinib 140mg tablets  
35 Dasatinib 80mg tablets  
36 Dasatinib 10mg/ml oral suspension  
37 Entrectinib 100mg capsules  
38 Entrectinib 200mg capsules  
39 Erlotinib 100mg tablets  
40 Erlotinib 150mg tablets  
41 Tarceva 100mg tablets (Roche Products Ltd)  
42 Tarceva 150mg tablets (Roche Products Ltd)  
43 Erlotinib 25mg tablets  
44 Tarceva 25mg tablets (Roche Products Ltd)  
45 Fostamatinib 100mg tablets  
46 Fostamatinib 150mg tablets  
47 Gefitinib 250mg tablets  
48 Iressa 250mg tablets (AstraZeneca UK Ltd)  
49 Timentin 3.2g powder for solution for infusion vials (Laboratoires Delbert)  
50 Ibrutinib 140mg capsules



1 Imbruvica 140mg capsules (Janssen-Cilag Ltd)  
2 Ibrutinib 140mg tablets  
3 Ibrutinib 280mg tablets  
4 Ibrutinib 420mg tablets  
5 Ibrutinib 560mg tablets  
6 Imbruvica 280mg tablets (Janssen-Cilag Ltd)  
7 Imbruvica 420mg tablets (Janssen-Cilag Ltd)  
8 Imatinib 100mg capsules  
9 Glivec 100mg capsules (Novartis Pharmaceuticals UK Ltd)  
10 Imatinib 400mg tablets  
11 Glivec 400mg tablets (Novartis Pharmaceuticals UK Ltd)  
12 Imatinib 100mg tablets  
13 Glivec 100mg tablets (Novartis Pharmaceuticals UK Ltd)  
14 Imatinib 400mg capsules  
15 Imatinib 80mg/ml oral solution sugar free  
16 Lapatinib 250mg tablets  
17 Lenvatinib 4mg capsules  
18 Lenvima 4mg capsules (Eisai Ltd)  
19 Lenvatinib 10mg capsules  
20 Nilotinib 200mg capsules  
21 Tasigna 200mg capsules (Novartis Pharmaceuticals UK Ltd)  
22 Nilotinib 150mg capsules  
23 Tasigna 150mg capsules (Novartis Pharmaceuticals UK Ltd)  
24 Nilotinib 50mg capsules  
25 Pazopanib 200mg tablets  
26 Pazopanib 400mg tablets  
27 Votrient 200mg tablets (Novartis Pharmaceuticals UK Ltd)  
28 Votrient 400mg tablets (Novartis Pharmaceuticals UK Ltd)  
29 Pegaptanib 300micrograms/0.09ml solution for injection pre-filled syringes  
30 Ruxolitinib 5mg tablets  
31 Ruxolitinib 15mg tablets  
32 Ruxolitinib 20mg tablets  
33 Jakavi 15mg tablets (Novartis Pharmaceuticals UK Ltd)  
34 Jakavi 20mg tablets (Novartis Pharmaceuticals UK Ltd)  
35 Ruxolitinib 10mg tablets  
36 Sorafenib 200mg tablets  
37 Nexavar 200mg tablets (Bayer Plc)  
38 Sunitinib 12.5mg capsules  
39 Sunitinib 25mg capsules  
40 Sunitinib 50mg capsules  
41 Sutent 12.5mg capsules (Pfizer Ltd)  
42 Sutent 25mg capsules (Pfizer Ltd)  
43 Sutent 50mg capsules (Pfizer Ltd)  
44 Vandetanib 100mg tablets  
45 Vandetanib 300mg tablets  
46 Vemurafenib 240mg tablets  
47 Zelboraf 240mg tablets (Roche Products Ltd)  
48 Medrone 100mg tablets (Pfizer Ltd)  
49 Methylprednisolone 100mg tablets  
50 Medrone 100mg tablets (Pfizer Ltd)

1  
2 Methylprednisolone 100mg tablets  
3 Prednisolone 20mg/application foam enema  
4 Prednisolone 25mg/1ml suspension for injection ampoules  
5 Prednisolone 25mg tablets  
6 Solu-Medrone 40mg powder and solvent for solution for injection vials (Pfizer Ltd)  
7 Solu-Medrone 1g powder and solvent for solution for injection vials (Pfizer Ltd)  
8 Solu-Medrone 125mg powder and solvent for solution for injection vials (Pfizer Ltd)  
9 Solu-Medrone 2g powder and solvent for solution for injection vials (Pfizer Ltd)  
10 Solu-Medrone 500mg powder and solvent for solution for injection vials (Pfizer Ltd)  
11 Prednisolone sodium phosphate 0.05% eye drops  
12 Prednisolone sodium phosphate 0.003% eye drops  
13 Prednisolone 5mg/5ml oral solution unit dose  
14 Prednisolone 30mg tablets  
15 Dexsol 2mg/5ml oral solution (Rosemont Pharmaceuticals Ltd)  
16 Dexamethasone 2mg/5ml oral solution sugar free  
17 Dexamethasone 4mg tablets  
18 Dexamethasone 5mg/5ml oral solution  
19 Dexamethasone 5mg/5ml oral suspension  
20 Dexamethasone 500micrograms/5ml oral solution  
21 Dexamethasone 500micrograms/5ml oral suspension  
22 Dexamethasone 700microgram intravitreal implant with device  
23 Ozurdex 700microgram intravitreal implant in applicator (Allergan Ltd)  
24 Dexamethasone 20mg/5ml oral solution sugar free  
25 Dexamethasone 2mg soluble tablets sugar free  
26 Dexamethasone 4mg soluble tablets sugar free  
27 Dexamethasone 8mg soluble tablets sugar free  
28 Glensoludex 2mg soluble tablets (Glenmark Pharmaceuticals Europe Ltd)  
29 Glensoludex 4mg soluble tablets (Glenmark Pharmaceuticals Europe Ltd)  
30 Glensoludex 8mg soluble tablets (Glenmark Pharmaceuticals Europe Ltd)  
31 Dexamethasone 40mg tablets  
32 Dexamethasone 8mg tablets  
33 Dexamethasone 10mg soluble tablets sugar free  
34 \*Abnoba Viscum Fraxini Injection D20, 1 ml ampoule  
35  
36  
37  
38  
39  
40  
41  
42  
43  
44  
45  
46  
47  
48  
49  
50  
51  
52  
53  
54  
55  
56  
57  
58  
59  
60



1  
2  
3  
4  
5  
6  
7  
8  
9  
10  
11  
12  
13  
14  
15  
16  
17  
18  
19  
20  
21  
22  
23  
24  
25  
26  
27  
28  
29  
30  
31  
32  
33  
34  
35  
36  
37  
38  
39  
40  
41  
42  
43  
44  
45  
46  
47  
48  
49  
50  
51  
52  
53  
54  
55  
56  
57  
58  
59  
60

For peer review only

1  
2  
3  
4  
5  
6  
7  
8  
9  
10  
11  
12  
13  
14  
15  
16  
17  
18  
19  
20  
21  
22  
23  
24  
25  
26  
27  
28  
29  
30  
31  
32  
33  
34  
35  
36  
37  
38  
39  
40  
41  
42  
43  
44  
45  
46  
47  
48  
49  
50  
51  
52  
53  
54  
55  
56  
57  
58  
59  
60

For peer review only

1  
2  
3  
4  
5  
6  
7  
8  
9  
10  
11  
12  
13  
14  
15  
16  
17  
18  
19  
20  
21  
22  
23  
24  
25  
26  
27  
28  
29  
30  
31  
32  
33  
34  
35  
36  
37  
38  
39  
40  
41  
42  
43  
44  
45  
46  
47  
48  
49  
50  
51  
52  
53  
54  
55  
56  
57  
58  
59  
60

For peer review only

1  
2  
3  
4  
5  
6  
7  
8  
9  
10  
11  
12  
13  
14  
15  
16  
17  
18  
19  
20  
21  
22  
23  
24  
25  
26  
27  
28  
29  
30  
31  
32  
33  
34  
35  
36  
37  
38  
39  
40  
41  
42  
43  
44  
45  
46  
47  
48  
49  
50  
51  
52  
53  
54  
55  
56  
57  
58  
59  
60

For peer review only

1  
2  
3  
4  
5  
6  
7  
8  
9  
10  
11  
12  
13  
14  
15  
16  
17  
18  
19  
20  
21  
22  
23  
24  
25  
26  
27  
28  
29  
30  
31  
32  
33  
34  
35  
36  
37  
38  
39  
40  
41  
42  
43  
44  
45  
46  
47  
48  
49  
50  
51  
52  
53  
54  
55  
56  
57  
58  
59  
60

d)  
d)

For peer review only

1  
2  
3  
4  
5  
6  
7  
8  
9  
10  
11  
12  
13  
14  
15  
16  
17  
18  
19  
20  
21  
22  
23  
24  
25  
26  
27  
28  
29  
30  
31  
32  
33  
34  
35  
36  
37  
38  
39  
40  
41  
42  
43  
44  
45  
46  
47  
48  
49  
50  
51  
52  
53  
54  
55  
56  
57  
58  
59  
60

For peer review only

1  
2  
3  
4  
5  
6  
7  
8  
9  
10  
11  
12  
13  
14  
15  
16  
17  
18  
19  
20  
21  
22  
23  
24  
25  
26  
27  
28  
29  
30  
31  
32  
33  
34  
35  
36  
37  
38  
39  
40  
41  
42  
43  
44  
45  
46  
47  
48  
49  
50  
51  
52  
53  
54  
55  
56  
57  
58  
59  
60

For peer review only

1  
2  
3  
4  
5  
6  
7  
8  
9  
10  
11  
12  
13  
14  
15  
16  
17  
18  
19  
20  
21  
22  
23  
24  
25  
26  
27  
28  
29  
30  
31  
32  
33  
34  
35  
36  
37  
38  
39  
40  
41  
42  
43  
44  
45  
46  
47  
48  
49  
50  
51  
52  
53  
54  
55  
56  
57  
58  
59  
60

For peer review only



1  
2  
3  
4  
5  
6  
7  
8  
9  
10  
11  
12  
13  
14  
15  
16  
17  
18  
19  
20  
21  
22  
23  
24  
25  
26  
27  
28  
29  
30  
31  
32  
33  
34  
35  
36  
37  
38  
39  
40  
41  
42  
43  
44  
45  
46  
47  
48  
49  
50  
51  
52  
53  
54  
55  
56  
57  
58  
59  
60

For peer review only

1  
2  
3  
4  
5  
6  
7  
8  
9  
10  
11  
12  
13  
14  
15  
16  
17  
18  
19  
20  
21  
22  
23  
24  
25  
26  
27  
28  
29  
30  
31  
32  
33  
34  
35  
36  
37  
38  
39  
40  
41  
42  
43  
44  
45  
46  
47  
48  
49  
50  
51  
52  
53  
54  
55  
56  
57  
58  
59  
60

For peer review only

1  
2  
3  
4  
5  
6  
7  
8  
9  
10  
11  
12  
13  
14  
15  
16  
17  
18  
19  
20  
21  
22  
23  
24  
25  
26  
27  
28  
29  
30  
31  
32  
33  
34  
35  
36  
37  
38  
39  
40  
41  
42  
43  
44  
45  
46  
47  
48  
49  
50  
51  
52  
53  
54  
55  
56  
57  
58  
59  
60

For peer review only

1  
2  
3  
4  
5  
6  
7  
8  
9  
10  
11  
12  
13  
14  
15  
16  
17  
18  
19  
20  
21  
22  
23  
24  
25  
26  
27  
28  
29  
30  
31  
32  
33  
34  
35  
36  
37  
38  
39  
40  
41  
42  
43  
44  
45  
46  
47  
48  
49  
50  
51  
52  
53  
54  
55  
56  
57  
58  
59  
60

For peer review only

1  
2  
3  
4  
5  
6  
7  
8  
9  
10  
11  
12  
13  
14  
15  
16  
17  
18  
19  
20  
21  
22  
23  
24  
25  
26  
27  
28  
29  
30  
31  
32  
33  
34  
35  
36  
37  
38  
39  
40  
41  
42  
43  
44  
45  
46  
47  
48  
49  
50  
51  
52  
53  
54  
55  
56  
57  
58  
59  
60

For peer review only

1  
2  
3  
4  
5  
6  
7  
8  
9  
10  
11  
12  
13  
14  
15  
16  
17  
18  
19  
20  
21  
22  
23  
24  
25  
26  
27  
28  
29  
30  
31  
32  
33  
34  
35  
36  
37  
38  
39  
40  
41  
42  
43  
44  
45  
46  
47  
48  
49  
50  
51  
52  
53  
54  
55  
56  
57  
58  
59  
60

l)

For peer review only

| OPCS code | Term                                                    |
|-----------|---------------------------------------------------------|
| W34       | Graft of bone marrow                                    |
| W34.1     | AUTOGRAFT OF BONE MARROW                                |
| W34.2     | ALLOGRAFT OF BONE MARROW NEC                            |
| W34.3     | ALLOGRAFT OF BONE MARROW FROM SIBLING DONOR             |
| W34.4     | ALLOGRAFT OF BONE MARROW FROM MATCHED UNRELATED DONOR   |
| W34.5     | ALLOGRAFT OF BONE MARROW FROM HAPLOIDENTICAL DONOR      |
| W34.6     | ALLOGRAFT OF BONE MARROW FROM UNMATCHED UNRELATED DONOR |
| W34.8     | Graft of bone marrow, OTHER SPECIFIED                   |
| W34.9     | Graft of bone marrow, UNSPECIFIED                       |
| W99       | Graft of bone marrow                                    |
| W99.1     | ALLOGRAFT OF CORD BLOOD STEM CELLS TO BONE MARROW       |
| W99.8     | Graft of bone marrow, OTHER SPECIFIED                   |
| W99.9     | Graft of bone marrow, UNSPECIFIED                       |
| X33.4     | AUTOLOGOUS PERIPHERAL BLOOD STEM CELL TRANSPLANT        |
| X33.5     | SYNGENEIC PERIPHERAL BLOOD STEM CELL TRANSPLANT         |
| X33.6     | ALLOGENEIC PERIPHERAL BLOOD STEM CELL TRANSPLANT        |

1  
2  
3  
4  
5  
6  
7  
8  
9  
10  
11  
12  
13  
14  
15  
16  
17  
18  
19  
20  
21  
22  
23  
24  
25  
26  
27  
28  
29  
30  
31  
32  
33  
34  
35  
36  
37  
38  
39  
40  
41  
42  
43  
44  
45  
46  
47  
48  
49  
50  
51  
52  
53  
54  
55  
56  
57  
58  
59  
60

3  
NOR

For peer review only



1  
2 Medcodeid  
3 215631000000118  
4 303686010  
5 303687018  
6 303690012  
7  
8 411383013  
9 1772803017  
10 131661000006114  
11 1119251000000112  
12 1689421000000115  
13 1747711000006116  
14 3230001000006118  
15 3828711000006113  
16 3992891000006113  
17 6567671000006110  
18 6567681000006113  
19 6567721000006118  
20 7281951000006112  
21 23676016  
22 297780010  
23 2164217010  
24 2816277010  
25 141181000006110  
26 141191000006113  
27 141201000006111  
28 141211000006114  
29 141221000006118  
30 141231000006115  
31 141241000006113  
32 413591000006113  
33 940531000006110  
34 2005411000006110  
35 2380521000000115  
36 2684701000006112  
37 3070701000006112  
38 3260101000006113  
39 3308541000006113  
40 4392811000006113  
41 4392911000006118  
42 6888471000006113  
43 6904721000006118  
44 6904731000006115  
45 6905681000006114  
46 6905701000006112  
47 6906651000006110  
48 6906661000006112  
49 7089281000006117  
50 12084841000006111  
51 12084861000006110  
52 12218521000006116

For peer review only

1  
2 12735431000006111  
3 12735441000006118  
4 351150014  
5 492446019  
6 2759411000006117  
7 2927341000006111  
8 4392941000006119  
9 3572551000006118  
10 3572591000006112  
11 3620711000006117  
12 2759391000006117  
13 7730691000006117  
14 2933771000006112  
15 3260631000006113  
16 5063951000006115  
17 4393011000006110  
18 3375911000006118  
19 6897941000006112  
20 3260621000006110  
21 3574151000006117  
22 3741651000006111  
23 3910091000006119  
24 8022691000006113  
25 2760441000006117  
26 3087921000006111  
27 3910111000006111  
28 3375961000006115  
29 3375951000006117  
30 3690391000006116  
31 3087931000006114  
32 2872741000006118  
33 4197441000006118  
34 3503691000006112  
35 6897931000006119  
36 6901291000006112  
37 5064031000006113  
38 9330921000006118  
39 3503711000006110  
40 3508741000006117  
41 3087941000006116  
42 4393031000006116  
43 7730701000006117  
44 501134015  
45 141261000006112  
46 510091000006118  
47 5064051000006118  
48 7730711000006119  
49 3625611000006116  
50 2769291000006117  
51 2760461000006118

For peer review only

1 5606361000006119  
2 3741641000006114  
3 3910101000006113  
4 7730721000006110  
5 2769261000006113  
6 3505255014  
7 5063871000006119  
8 2584211000006111  
9 3572561000006116  
10 3726941000006112  
11 4392911000006118  
12 3726951000006114  
13 4392921000006114  
14 110881000006115  
15 294586010  
16 881981000006110  
17 477758018  
18 3574141000006119  
19 5064041000006115  
20 2769271000006118  
21 3959891000006111  
22 9330941000006113  
23 2760431000006110  
24 3505254013  
25 4393081000006115  
26 4393061000006113  
27 3869571000006114  
28 9330911000006114  
29 3505252012  
30 5063971000006113  
31 3910121000006115  
32 4393021000006119  
33 4393051000006111  
34 3087871000006118  
35 3572571000006111  
36 2759381000006115  
37 2927331000006118  
38 2759371000006118  
39 474030011  
40 2872731000006111  
41 3910081000006117  
42 5606351000006116  
43 5063941000006117  
44 3375921000006114  
45 2933781000006110  
46 3375931000006112  
47 7769041000006118  
48 6901301000006113  
49 4393041000006114  
50 8022671000006112

For peer review only

1  
2 3620681000006118  
3 4392981000006113  
4 4392961000006115  
5 7750601000006113  
6 3087851000006111  
7 7750581000006115  
8 3959881000006113  
9 7750591000006117  
10 8022681000006110  
11 5063991000006114  
12 8022661000006117  
13 5063961000006118  
14 12735491000006110  
15 3910131000006117  
16 4392971000006110  
17 3145291000006113  
18 3572581000006114  
19 4197431000006111  
20 3625601000006119  
21 5063981000006111  
22 12735511000006116  
23 399206011  
24 3869581000006112  
25 3505251017  
26 3087881000006115  
27 3690381000006119  
28 3375941000006119  
29 4393071000006118  
30 3508751000006115  
31 3620691000006115  
32 2584231000006117  
33 9330931000006115  
34 3726961000006111  
35 2759401000006115  
36 399209016  
37 500268011  
38 7750571000006118  
39 2760451000006115  
40 7769031000006111  
41 5064021000006110  
42 2927351000006113  
43 2927381000006117  
44 711521000006117  
45 711531000006119  
46 2584251000006112  
47 2584181000006112  
48 2592491000006111  
49 2584261000006114  
50 496520018  
51 2592511000006117  
52  
53  
54  
55  
56  
57  
58  
59  
60

For peer review only

1  
2 5313751000006118  
3 2592521000006113  
4 2584221000006115  
5 2584191000006110  
6 2592541000006118  
7 2584271000006119  
8 2592531000006111  
9 2592501000006115  
10 2584201000006113  
11 5313761000006116  
12  
13  
14  
15  
16  
17  
18  
19  
20  
21  
22  
23  
24  
25  
26  
27  
28  
29  
30  
31  
32  
33  
34  
35  
36  
37  
38  
39  
40  
41  
42  
43  
44  
45  
46  
47  
48  
49  
50  
51  
52  
53  
54  
55  
56  
57  
58  
59  
60

For peer review only

1  
2 Term  
3 Asplenia  
4 Congenital coeliac disease  
5 Acquired coeliac disease  
6 Coeliac disease NOS  
7 Coeliac rickets  
8 Coeliac disease  
9 Sprue - nontropical  
10 Coeliac disease autoantibody profile positive  
11 Coeliac disease annual review  
12 Coeliac disease annual review  
13 Coeliac infantilism  
14 Sprue  
15 Adult form of coeliac disease  
16 Celiac disease  
17 CD - Coeliac disease  
18 Coeliac syndrome  
19 Autoantibody screening for coeliac disease positive  
20 Sickle cell nephropathy  
21 Proliferative retinopathy due to sickle cell disease  
22 RBC's - sickle cells present  
23 History of sickle cell anaemia  
24 Sickle cell anaemia  
25 Sickle-cell anaemia NOS  
26 Sickle-cell anaemia of unspecified type  
27 Sickle cell anaemia with crisis  
28 Sickle cell anaemia with haemoglobin C disease  
29 Sickle-cell anaemia with haemoglobin D disease  
30 Sickle-cell anaemia with haemoglobin E disease  
31 [X]Other sickle-cell disorders  
32 H/O: sickle cell disease  
33 Sickle cell disease annual review  
34 Referral to sickle cell specialist nurse  
35 Sickle cell retinopathy  
36 Sickle cell-haemoglobin C disease  
37 Sickle cell anaemia with haemoglobin E disease  
38 Sickle cell  
39 Sickle cell anemia  
40 Sickle cell-beta-thalassaemia  
41 Sickle cell disease without crisis  
42 Hemoglobin S sickling disorder with crisis  
43 Sickle cell anemia crisis  
44 Sickling disorder due to haemoglobin S  
45 Sickle cell disease  
46 Sickle cell crisis  
47 Sickle cell anemia with crisis  
48 Suspected sickle cell  
49 Vaso-occlusive pain episode in sickle cell disease  
50 Vasoocclusive pain episode in sickle cell disease  
51 Sickle cell-haemoglobin SS disease

1 NHS Sickle Cell and Thalassaemia Screening Programme result consistent with Hb SS (sickle cell-Haemoglobin S)  
2 NHS Sickle Cell and Thalassaemia Screening Programme result consistent with sickle cell anaemia  
3 Homozygous alpha thalassaemia  
4 Thalassaemia  
5 F thalassaemia  
6 Homozygous beta thalassaemia  
7 Double heterozygous for Hb S and beta thalassaemia  
8 beta Thalassaemia  
9 Beta thalassaemia syndrome  
10 Alpha thalassaemia syndrome  
11 Delta-beta thalassaemia  
12 Alpha thalassaemia X-linked intellectual disability syndrome  
13 beta<sup>0</sup> Thalassaemia deletion type  
14 Thalassaemia with other hemoglobinopathy  
15 Delta-beta-Lepore thalassaemia  
16 Sickle cell-beta<sup>0</sup>-thalassaemia  
17 HPFH delta beta<sup>0</sup> thalassaemia  
18 Sickle cell-thalassaemia disease with crisis  
19 Thalassaemia with other haemoglobinopathy  
20 alpha<sup>0</sup> Thalassaemia  
21 delta beta<sup>0</sup> Thalassaemia  
22 beta<sup>0</sup> Thalassaemia  
23 Maternal thalassaemia in pregnancy  
24 delta Thalassaemia  
25 Thalassaemia-haemoglobin S disease  
26 Beta 0 thalassaemia  
27 Hereditary persistence of fetal haemoglobin delta beta<sup>0</sup> thalassaemia  
28 Hereditary persistence of fetal hemoglobin delta beta<sup>0</sup> thalassaemia  
29 epsilon gamma delta beta<sup>0</sup> Thalassaemia  
30 Sickle cell thalassaemia disease  
31 epsilon gamma delta beta Thalassaemia  
32 beta<sup>0</sup> Thalassaemia nondeletion type  
33 Thalassaemia-haemoglobin C disease  
34 Sickle cell-thalassaemia disease with crisis  
35 Sickle cell-thalassaemia disease without crisis  
36 Hemoglobin E/beta thalassaemia disease  
37 Thalassaemia in mother complicating childbirth  
38 Thalassaemia-hemoglobin C disease  
39 delta<sup>0</sup> Thalassaemia  
40 Sickle cell thalassaemia disease  
41 Sickle cell-delta beta<sup>0</sup>-thalassaemia  
42 Alpha thalassaemia X-linked intellectual disability syndrome  
43 Alpha thalassaemia syndrome  
44 Haemoglobin S/beta thalassaemia  
45 Beta thalassaemia major  
46 Double heterozygous for Hb E and beta thalassaemia  
47 Alpha thalassaemia X-linked intellectual deficit  
48 Hb Lepore thalassaemia  
49 Hereditary persistence of fetal haemoglobin thalassaemia  
50 Delta thalassaemia

1 Alpha thalassaemia-mental retardation syndrome  
2 delta beta<sup>0</sup> Thalassaemia  
3 Beta 0 thalassaemia  
4 Alpha thalassaemia X-linked intellectual deficit  
5 Hereditary persistence of foetal haemoglobin thalassaemia  
6 Alpha thalassaemia intellectual disability syndrome deletion type  
7 Homozygous alpha thalassaemia  
8 Alpha thalassaemia major  
9 beta Thalassaemia  
10 Thalassaemia major  
11 Sickle cell-beta-thalassaemia  
12 Homozygous thalassaemia  
13 Sickle cell-beta-thalassaemia  
14 Thalassaemia major - Cooley's anaemia  
15 [X]Other thalassaemias  
16 Thalassaemias  
17 Delta-beta thalassaemia  
18 alpha<sup>0</sup> Thalassaemia  
19 Double heterozygous for Hb E and beta thalassaemia  
20 Hereditary persistence of fetal hemoglobin thalassaemia  
21 <sup>A</sup>gamma delta beta<sup>0</sup> thalassaemia  
22 Maternal thalassaemia in childbirth  
23 delta Thalassaemia  
24 Alpha thalassaemia intellectual disability syndrome deletion type  
25 Sickle cell trait with coexistent alpha-thalassaemia  
26 Sickle cell anemia with coexistent alpha-thalassaemia  
27 Thalassaemia syndrome  
28 Thalassaemia in mother complicating childbirth  
29 Alpha-thalassaemia intellectual disability syndrome linked to chromosome 16  
30 Alpha-beta thalassaemia  
31 Beta zero thalassaemia  
32 Sickle cell-beta<sup>0</sup>-thalassaemia  
33 Sickle cell anaemia with coexistent alpha-thalassaemia  
34 Thalassaemia-hemoglobin S disease  
35 Beta thalassaemia  
36 delta beta Thalassaemia  
37 Homozygous beta thalassaemia  
38 delta beta Thalassaemia  
39 Thalassaemia with haemoglobin S disease  
40 epsilon gamma delta beta Thalassaemia  
41 beta<sup>0</sup> Thalassaemia  
42 Alpha thalassaemia-mental retardation syndrome  
43 Delta-beta-Lepore thalassaemia  
44 HPFH delta beta<sup>0</sup> thalassaemia  
45 beta<sup>0</sup> Thalassaemia deletion type  
46 Hereditary persistence of fetal hemoglobin (HPFH) delta beta<sup>0</sup> thalassaemia  
47 Beta thalassaemia X-linked thrombocytopenia syndrome  
48 Sickle cell-thalassaemia disease without crisis  
49 Sickle cell-delta beta<sup>0</sup>-thalassaemia  
50 Maternal thalassaemia in pregnancy



1 alpha Thalassemia  
2 Thalassemia with hemoglobin S disease  
3 Double heterozygous for Hb S and beta thalassemia  
4 Inclusion body beta-thalassaemia  
5 Sickle cell-thalassaemia disease  
6 Dominant beta-thalassemia  
7  $\alpha\alpha$ gamma delta beta<sup>0</sup> thalassaemia  
8 Inclusion body beta-thalassemia  
9 Thalassemia in mother complicating pregnancy  
10 Gamma thalassemia  
11 Thalassemia in mother complicating pregnancy  
12 Alpha-beta thalassaemia  
13 NHS Sickle Cell and Thalassaemia Screening Programme result consistent with sickle cell beta-thalassaemia  
14 Beta zero thalassaemia  
15 Hemoglobin S/beta thalassemia  
16 Thalassemia  
17 Beta thalassemia syndrome  
18 beta<sup>0</sup> Thalassaemia nondeletion type  
19 Hb Lepore thalassaemia  
20 Gamma thalassaemia  
21 NHS Sickle Cell and Thalassaemia Screening Programme result consistent with Hb (haemoglobin) variant and/c  
22 Thalassemia major  
23 Thalassemia syndrome  
24 Alpha-thalassemia intellectual disability syndrome linked to chromosome 16  
25 Sickle cell-thalassemia disease  
26 epsilon gamma delta beta<sup>0</sup> Thalassaemia  
27 Hereditary persistence of foetal haemoglobin (HPFH) delta beta<sup>0</sup> thalassaemia  
28 Sickle cell trait with coexistent alpha-thalassaemia  
29 delta<sup>0</sup> Thalassemia  
30 alpha Thalassemia  
31 Alpha thalassaemia major  
32 Maternal thalassaemia in childbirth  
33 Homozygous thalassaemia  
34 F thalassemia  
35 Thalassemia NOS  
36 Beta thalassaemia  
37 Dominant beta-thalassaemia  
38 Delta thalassaemia  
39 Beta thalassaemia X-linked thrombocytopenia syndrome  
40 Haemoglobin E/beta thalassaemia disease  
41 Cooley's anemia  
42 Cooley's anaemia  
43 Mediterranean anaemia  
44 Mediterranean anaemia  
45 Haemoglobin Barts hydrops  
46 Haemoglobin Bart's hydrops syndrome  
47 Haemoglobin Bart  
48 Haemoglobin Bart hydrops syndrome  
49 Haemoglobin Bart's disease  
50 Haemoglobin Barts  
51

- 1
- 2 Haemoglobin Barts identification
- 3 Hb - Haemoglobin Barts
- 4 Hemoglobin Barts hydrops
- 5 Hemoglobin Bart's hydrops syndrome
- 6 Hb - Hemoglobin Barts
- 7 Hemoglobin Bart hydrops syndrome
- 8 Hemoglobin Barts
- 9 Hemoglobin Bart
- 10 Hemoglobin Bart's disease
- 11 Hemoglobin Barts identification
- 12
- 13
- 14
- 15
- 16
- 17
- 18
- 19
- 20
- 21
- 22
- 23
- 24
- 25
- 26
- 27
- 28
- 29
- 30
- 31
- 32
- 33
- 34
- 35
- 36
- 37
- 38
- 39
- 40
- 41
- 42
- 43
- 44
- 45
- 46
- 47
- 48
- 49
- 50
- 51
- 52
- 53
- 54
- 55
- 56
- 57
- 58
- 59
- 60

For peer review only

1  
2  
3  
4  
5  
6  
7  
8  
9  
10  
11  
12  
13  
14  
15  
16  
17  
18  
19  
20  
21  
22  
23  
24  
25  
26  
27  
28  
29  
30  
31  
32  
33  
34  
35  
36  
37  
38  
39  
40  
41  
42  
43  
44  
45  
46  
47  
48  
49  
50  
51  
52  
53  
54  
55  
56  
57  
58  
59  
60

For peer review only

1  
2  
3  
4  
5  
6  
7  
8  
9  
10  
11  
12  
13  
14  
15  
16  
17  
18  
19  
20  
21  
22  
23  
24  
25  
26  
27  
28  
29  
30  
31  
32  
33  
34  
35  
36  
37  
38  
39  
40  
41  
42  
43  
44  
45  
46  
47  
48  
49  
50  
51  
52  
53  
54  
55  
56  
57  
58  
59  
60

For peer review only

1  
2  
3  
4  
5  
6  
7  
8  
9  
10  
11  
12  
13  
14  
15  
16  
17  
18  
19  
20  
21  
22  
23  
24  
25  
26  
27  
28  
29  
30  
31  
32  
33  
34  
35  
36  
37  
38  
39  
40  
41  
42  
43  
44  
45  
46  
47  
48  
49  
50  
51  
52  
53  
54  
55  
56  
57  
58  
59  
60

For peer review only

1  
2  
3  
4  
5  
6  
7  
8  
9  
10  
11  
12  
13  
14  
15  
16  
17  
18  
19  
20  
21  
22  
23  
24  
25  
26  
27  
28  
29  
30  
31  
32  
33  
34  
35  
36  
37  
38  
39  
40  
41  
42  
43  
44  
45  
46  
47  
48  
49  
50  
51  
52  
53  
54  
55  
56  
57  
58  
59  
60

emia

For peer review only

| ICD-10 code | Term                                               |
|-------------|----------------------------------------------------|
| Q89.0       | Congenital malformations of spleen                 |
| Q89.0       | Congenital malformations of spleen                 |
| K90.0       | Coeliac Disease                                    |
| D57         | Sickle-Cell Disorders                              |
| D57.0       | Sickle-cell anaemia with crisis                    |
| D57.1       | Sickle-cell anaemia without crisis                 |
| D57.2       | Double heterozygous sickling disorders             |
| D57.8       | Other sickle-cell disorders                        |
| D56         | Thalassaemia                                       |
| D56.0       | Alpha thalassaemia                                 |
| D56.1       | Beta thalassaemia                                  |
| D56.2       | Delta-beta thalassaemia                            |
| D56.4       | Hereditary persistence of fetal haemoglobin [HPFH] |
| D56.8       | Other thalassaemias                                |
| D56.9       | Thalassaemia, unspecified                          |
| D57.2       | Double heterozygous sickling disorders             |

peer review only

|    | Medcodeid         | Term                                                            |
|----|-------------------|-----------------------------------------------------------------|
| 1  |                   |                                                                 |
| 2  |                   |                                                                 |
| 3  | 293635019         | Extreme obesity with alveolar hypoventilation                   |
| 4  | 356968010         | Morbid obesity                                                  |
| 5  | 2160062010        | Body mass index 40+ - severely obese                            |
| 6  | 881831000006116   | Hyperalimantation incl.obesity                                  |
| 7  |                   |                                                                 |
| 8  | 1900331000006113  | Obese class III (body mass index equal to or greater than 40.0) |
| 9  | 1991711000006112  | Reason for influenza vaccine - BMI 40+                          |
| 10 | 6763391000006114  | Body mass index 40+ - morbidly obese                            |
| 11 | 6763401000006111  | BMI (body mass index) 40+ - severely obese                      |
| 12 | 7299071000006115  | Childhood obesity BMI 95-100 percentile                         |
| 13 |                   |                                                                 |
| 14 | 8024931000006112  | Severe obesity                                                  |
| 15 | 13926671000006119 | Obese class III                                                 |
| 16 |                   |                                                                 |
| 17 |                   |                                                                 |
| 18 |                   |                                                                 |
| 19 |                   |                                                                 |
| 20 |                   |                                                                 |
| 21 |                   |                                                                 |
| 22 |                   |                                                                 |
| 23 |                   |                                                                 |
| 24 |                   |                                                                 |
| 25 |                   |                                                                 |
| 26 |                   |                                                                 |
| 27 |                   |                                                                 |
| 28 |                   |                                                                 |
| 29 |                   |                                                                 |
| 30 |                   |                                                                 |
| 31 |                   |                                                                 |
| 32 |                   |                                                                 |
| 33 |                   |                                                                 |
| 34 |                   |                                                                 |
| 35 |                   |                                                                 |
| 36 |                   |                                                                 |
| 37 |                   |                                                                 |
| 38 |                   |                                                                 |
| 39 |                   |                                                                 |
| 40 |                   |                                                                 |
| 41 |                   |                                                                 |
| 42 |                   |                                                                 |
| 43 |                   |                                                                 |
| 44 |                   |                                                                 |
| 45 |                   |                                                                 |
| 46 |                   |                                                                 |
| 47 |                   |                                                                 |
| 48 |                   |                                                                 |
| 49 |                   |                                                                 |
| 50 |                   |                                                                 |
| 51 |                   |                                                                 |
| 52 |                   |                                                                 |
| 53 |                   |                                                                 |
| 54 |                   |                                                                 |
| 55 |                   |                                                                 |
| 56 |                   |                                                                 |
| 57 |                   |                                                                 |
| 58 |                   |                                                                 |
| 59 |                   |                                                                 |
| 60 |                   |                                                                 |

For peer review only



| ICD-10 code | Term                                          |
|-------------|-----------------------------------------------|
| E66.2       | Extreme obesity with alveolar hypoventilation |
| Z68.4       | Body mass index [BMI] 40 or greater, adult    |

For peer review only

1  
2 Medcodeid  
3 1485215015  
4 940171000006115  
5 940181000006117  
6 940191000006119  
7 940201000006116  
8 1822141000006115  
9 1882331000006116  
10 2189071000000110  
11 8136471000006118  
12 294806015  
13 294815010  
14 294828015  
15 294840015  
16 294874016  
17 401866015  
18 401869010  
19 82151000006114  
20 82171000006116  
21 367051000006112  
22 367071000006119  
23 424531000006118  
24 424541000006111  
25 424551000006113  
26 424571000006115  
27 424671000006116  
28 424681000006118  
29 513691000006116  
30 513701000006116  
31 513721000006114  
32 513731000006112  
33 1715191000006112  
34 1715781000006110  
35 1755901000006112  
36 1755911000006110  
37 2729751000000118  
38 2729991000000112  
39 2957311000006113  
40 3087971000006112  
41 3468391000006115  
42 3743451000006110  
43 3767531000006119  
44 5106081000006110  
45 7127651000006115  
46 7127661000006118  
47 8232571000006118  
48 8232591000006117  
49 294919015  
50 296083012  
51 401859016

For peer review only

1 401860014  
2  
3 362221000006114  
4 362271000006110  
5 362381000006115  
6 362391000006117  
7 362421000006113  
8 882301000006112  
9 1872381000006112  
10 1975621000006117  
11 1975671000006116  
12 1975681000006118  
13 1975691000006115  
14 1975711000006117  
15 1975731000006111  
16 1975761000006119  
17 1975781000006112  
18 1975821000006118  
19 1975851000006110  
20 1975871000006117  
21 1975901000006117  
22 2730111000000111  
23 5568191000006118  
24 7696261000006113  
25 130538010  
26 28758018  
27 43595011  
28 52897013  
29 71539017  
30 107878010  
31 114616017  
32 132503015  
33 294725013  
34 294726014  
35 294727017  
36 294728010  
37 294730012  
38 294731011  
39 294734015  
40 294735019  
41 294736018  
42 294737010  
43 294738017  
44 294739013  
45 294741014  
46 294742019  
47 294743012  
48 294744018  
49 294750011  
50 294751010  
51 294753013

For peer review only

1  
2 294754019  
3 294757014  
4 294758016  
5 294760019  
6 294764011  
7 294765012  
8 294766013  
9 294767016  
10 294768014  
11 294769018  
12 294771018  
13 294773015  
14 294787015  
15 294788013  
16 294789017  
17 294790014  
18 296022017  
19 296031017  
20 296040018  
21 296095012  
22 296096013  
23 346955013  
24 401763015  
25 401764014  
26 401855010  
27 1219653018  
28 1234861017  
29 78531000006116  
30 123611000006110  
31 155141000006116  
32 155161000006117  
33 169061000006112  
34 366571000006114  
35 367951000006113  
36 367971000006115  
37 368001000006112  
38 368011000006110  
39 370451000006110  
40 370631000006117  
41 371031000006115  
42 376251000006112  
43 378051000006119  
44 388741000006110  
45 395021000006111  
46 395031000006114  
47 398631000006113  
48 418221000006118  
49 418261000006112  
50 423041000006119  
51 423271000006116

For peer review only

1  
2 423471000006117  
3 423731000006114  
4 423741000006116  
5 424841000006113  
6 424931000006113  
7 425501000006113  
8 425511000006111  
9 425521000006115  
10 425541000006110  
11 425551000006112  
12 425561000006114  
13 425571000006119  
14 425581000006116  
15 425601000006114  
16 425631000006118  
17 425641000006111  
18 425651000006113  
19 425671000006115  
20 425681000006117  
21 425691000006119  
22 425701000006119  
23 425711000006116  
24 426881000006111  
25 456731000006115  
26 456801000006115  
27 556631000006116  
28 819351000006115  
29 882281000006113  
30 882291000006111  
31 1971471000006117  
32 1972011000006110  
33 1972261000006117  
34 1972861000006118  
35 1973051000006118  
36 1973581000006116  
37 1973831000006119  
38 1974351000006118  
39 1974391000006112  
40 1974431000006118  
41 1974451000006113  
42 1974481000006117  
43 1974541000006112  
44 1974601000006111  
45 1974611000006114  
46 1974621000006118  
47 1974641000006113  
48 1974671000006117  
49 1974721000006114  
50 1974751000006117  
51 1974781000006113

For peer review only

1  
2 1974801000006112  
3 1974831000006116  
4 1974861000006113  
5 1974921000006111  
6 1975051000006119  
7 1975141000006117  
8 1975191000006114  
9 1975211000006110  
10 1975231000006116  
11 1975261000006113  
12 1975281000006115  
13 1975301000006116  
14 1975321000006114  
15 1975351000006117  
16 1975381000006113  
17 1975401000006113  
18 1975431000006117  
19 1975441000006110  
20 1975481000006116  
21 1975491000006118  
22 1975501000006114  
23 1975521000006116  
24 1975551000006113  
25 1975571000006115  
26 1975641000006112  
27 1975751000006116  
28 1975771000006114  
29 1975801000006111  
30 1975831000006115  
31 1975841000006113  
32 1975911000006119  
33 1976001000006113  
34 1976061000006114  
35 1976101000006112  
36 1976121000006119  
37 1976141000006114  
38 1976171000006118  
39 1976881000006112  
40 1976891000006110  
41 1976901000006114  
42 1976911000006112  
43 1976931000006118  
44 1976941000006111  
45 1976951000006113  
46 1976961000006110  
47 3000261000006112  
48 3068121000006112  
49 3118041000006112  
50 3137261000006111  
51 3862661000006112

For peer review only

1 3946141000006118  
2 4082931000006110  
3 4539931000006112  
4 4763641000006116  
5 4763911000006114  
6 4763921000006118  
7 5023901000006110  
8 5248961000006113  
9 5517971000006118  
10 6890801000006117  
11 12480451000006112  
12 10122017  
13 119579013  
14 294662017  
15 294673012  
16 294675017  
17 294676016  
18 294693016  
19 294714016  
20 294721016  
21 294897018  
22 294902017  
23 294913019  
24 294917018  
25 294924017  
26 294941015  
27 294944011  
28 346897015  
29 401768012  
30 401771016  
31 401772011  
32 401862018  
33 1227584015  
34 215851000000112  
35 223601000000119  
36 223611000000117  
37 300411000000110  
38 300931000000113  
39 359091000006115  
40 359161000006110  
41 362781000006116  
42 362981000006119  
43 366551000006116  
44 367061000006114  
45 367991000006119  
46 370981000006112  
47 376271000006119  
48 376281000006116  
49 377461000006113  
50 379901000006113

For peer review only

1  
2 389451000006110  
3 389681000006116  
4 394681000006119  
5 394691000006116  
6 396771000006117  
7 396781000006119  
8 396801000006115  
9 397581000006111  
10 397621000006111  
11 397641000006116  
12 397661000006117  
13 397691000006113  
14 404041000006111  
15 424071000006112  
16 424281000006115  
17 424511000006112  
18 426951000006112  
19 426981000006116  
20 428441000006116  
21 476741000006111  
22 630831000006113  
23 753331000006118  
24 853201000006116  
25 1821481000006114  
26 2502581000000119  
27 3504751000006114  
28 3627341000006115  
29 3630121000006110  
30 3630151000006118  
31 4763211000006118  
32 4763231000006112  
33 4764511000006119  
34 5023531000006114  
35 5023541000006116  
36 5106071000006112  
37 6348061000006115  
38 6515001000006117  
39 6519941000006116  
40 7766271000006113  
41 7790241000006117  
42 7822921000006111  
43 8028531000006112  
44 8089301000006110  
45 8342781000006115  
46 8365411000006116  
47 12115591000006111  
48 12736721000006110  
49 14333601000006113  
50 296110017  
51 882321000006119

For peer review only



1  
2 2730071000000117  
3 2730091000000118  
4 294802018  
5 294803011  
6 294804017  
7 294805016  
8 294807012  
9 294809010  
10 294810017  
11 294811018  
12 294812013  
13 294813015  
14 294818012  
15 294847017  
16 294848010  
17 294849019  
18 294850019  
19 294858014  
20 294860011  
21 294891017  
22 294892012  
23 294893019  
24 294896010  
25 296118012  
26 401765010  
27 401864017  
28 1780205015  
29 2157096015  
30 182861000006110  
31 182871000006115  
32 367081000006116  
33 367111000006110  
34 367151000006111  
35 396071000006119  
36 396741000006113  
37 396761000006112  
38 396791000006116  
39 424661000006111  
40 513741000006119  
41 513801000006112  
42 789221000006116  
43 851691000006114  
44 882311000006110  
45 1971601000006113  
46 1972091000006117  
47 1972351000006113  
48 1972961000006114  
49 1973061000006116  
50 1973121000006111  
51 1973751000006115

For peer review only

1  
2 1973991000006111  
3 1974791000006111  
4 1975411000006111  
5 1975701000006115  
6 3006671000006118  
7  
8 3447781000006113  
9 5023961000006111  
10 5649431000006118  
11 5688921000006114  
12 5688931000006112  
13  
14 12059211000006119  
15 294861010  
16 294862015  
17 294863013  
18 294868016  
19 294869012  
20 294870013  
21 294871012  
22 294872017  
23 294877011  
24 294880012  
25 294881011  
26 294882016  
27 294883014  
28 294888017  
29 294895014  
30 296135011  
31 401865016  
32 82091000006116  
33 367091000006118  
34 367101000006112  
35 367121000006119  
36 367161000006113  
37 398541000006116  
38 513711000006118  
39 513751000006117  
40 513871000006118  
41 701051000006118  
42 701071000006111  
43 1785851000006110  
44 1785861000006112  
45 1785871000006117  
46 1972101000006111  
47 1975931000006113  
48 1975941000006115  
49 2652251000000113  
50 3854401000006113  
51 4767311000006117  
52 5023451000006115  
53 5435901000006117  
54  
55  
56  
57  
58  
59  
60

For peer review only

1 5933701000006116  
2 6891981000006111  
3 8041781000006111  
4 8235161000006110  
5 12059201000006117  
6 12059221000006110  
7 13716031000006110  
8 13911951000006118  
9 1780423014  
10 1780425019  
11 851561000006119  
12 940461000006119  
13 940471000006114  
14 1807681000006114  
15 4082431000006119  
16 5513141000006117  
17 6047261000006111  
18 6650041000006113  
19 13796551000006113  
20 3062551000006110  
21 5253131000006114  
22 5272841000006115  
23 4764871000006114  
24 295017014  
25 296254015  
26 296255019  
27 269821000006113  
28 400321000006113  
29 4764881000006112  
30 94597012  
31 251631011  
32 317233013  
33 317235018  
34 372208017  
35 363321000006111  
36 366521000006113  
37 960281000006115  
38 3423851000006118  
39 3799251000006119  
40 3799261000006117  
41 12717671000006110  
42 1222496015  
43 366541000006118  
44 368051000006111  
45 368061000006113  
46 527421000006116  
47 3027091000006119  
48 3468921000006116  
49 8039381000006110  
50 295436010  
51  
52  
53  
54  
55  
56  
57  
58  
59  
60

For peer review only

1  
2 295437018  
3 295451018  
4 295452013  
5 296361019  
6 296379015  
7 401889011  
8 1780181019  
9 577901000006119  
10 664031000000110  
11 882611000006115  
12 988931000006112  
13 1620911000006112  
14 1664151000006114  
15 1764491000006116  
16 1776641000006112  
17 1911761000006111  
18 2308361000000115  
19 2451711000000111  
20 2652391000000113  
21 5550181000006114  
22 6025191000006115  
23 6452531000006114  
24 7079921000006119  
25 7230101000006110  
26 7567401000006119  
27 8274831000006110  
28 8440231000006115  
29 14232971000006112  
30  
31  
32  
33  
34  
35  
36  
37  
38  
39  
40  
41  
42  
43  
44  
45  
46  
47  
48  
49  
50  
51  
52  
53  
54  
55  
56  
57  
58  
59  
60

For peer review only

## 1 Term

2 On severe mental illness register

3 Severe mental illness monitoring administration

4 Severe mental illness monitoring invite 1

5 Severe mental illness monitoring invite 2

6 Severe mental illness monitoring invite 3

7 Severe mental illness - enhanced services administration

8 Severe mental illness - enhanced service completed

9 Severe mental illness enhanced services administration

10 Patient suffering from severe mental impairment under Mental Health Act 1983

11 Single manic episode, severe, with psychosis

12 Recurrent manic episodes, severe, with psychosis

13 Single major depressive episode, severe, with psychosis

14 Recurrent major depressive episodes, severe, with psychosis

15 Mixed bipolar affective disorder, severe, with psychosis

16 [X]Severe depressive episode without psychotic symptoms

17 [X]Severe depressive episode with psychotic symptoms

18 Severe bipolar disorder without psychotic features

19 Severe bipolar disorder with psychotic features

20 Severe depressed bipolar I disorder without psychotic features

21 Bipolar affective disorder, currently manic, severe, with psychosis

22 [X]Recurr depress disorder cur epi severe without psyc sympt

23 [X]Recurr severe episodes/major depression+psychotic symptom

24 [X]Recurr severe episodes/psychogenic depressive psychosis

25 [X]Recurrent depress disorder cur epi severe with psyc symp

26 [X]Recurrent severe episodes of psychotic depression

27 Recurrent reactive depressive episodes, severe, with psychosis

28 Severe manic bipolar I disorder without psychotic features

29 Bipolar affect disord, currently manic,severe with psychosis

30 Bipolar affect disord, now depressed, severe with psychosis

31 Bipolar affect disord, now depressed, severe, no psychosis

32 Severe major depression with psychotic features

33 Severe major depression without psychotic features

34 [X]Single major depressive episode, severe, with psychosis, psychosis in remission

35 [X]Recurrent major depressive episodes, severe, with psychosis, psychosis in remission

36 Recurrent depression with current severe episode and psychotic features

37 Recurrent depression with current severe episode without psychotic features

38 Severe recurrent major depression with psychotic features

39 Severe recurrent major depression without psychotic features

40 Severe bipolar I disorder, most recent episode depressed with psychotic features

41 Severe major depression, single episode, without psychotic features

42 Severe major depression, single episode, with psychotic features, mood-congruent

43 Severe postnatal psychosis

44 Severe major depression, single episode, with psychotic features

45 Major depressive disorder, single episode, severe with psychotic features

46 Single major depressive episode, severe, with psychosis, psychosis in remission

47 Recurrent major depressive episodes, severe, with psychosis, psychosis in remission

48 Acute hysterical psychosis

49 [X]Other acute and transient psychotic disorders

50 [X]Other acute predominantly delusional psychotic disorders

- 1
- 2 [X]Acute and transient psychotic disorder, unspecified
- 3 [X]Acute / subacute infective psychosis
- 4 Acute transient psychotic disorder
- 5 Acute polymorphic psychotic disorder co-occurrent with symptoms of schizophrenia
- 6 Acute polymorphic psychotic disorder without symptoms of schizophrenia
- 7 Acute schizophrenia-like psychotic disorder
- 8 Acute schizo affective psychosis
- 9
- 10 Accom status - NHS acute psychiatric ward
- 11 Acute polymorphic psychot disord without symp of schizoph, without associated acute stress
- 12 Acute polymorphic psychot disord without symp of schizoph, with associated acute stress
- 13 Acute polymorphic psychot disord with symp of schizophren, without associated acute stress
- 14 Acute polymorphic psychot disord with symp of schizophren, with associated acute stress
- 15 Acute schizophrenia-like psychotic disorder, without associated acute stress
- 16 Acute schizophrenia-like psychotic disorder, with associated acute stress
- 17 Other acute predominantly delusional psychotic disorders, without associated acute stress
- 18 Other acute predominantly delusional psychotic disorders, with associated acute stress
- 19 Other acute and transient psychotic disorders, without associated acute stress
- 20 Other acute and transient psychotic disorders, with associated acute stress
- 21 Acute and transient psychotic disorder, unspecified, without associated acute stress
- 22 Acute and transient psychotic disorder, unspecified, with associated acute stress
- 23 Acute predominantly delusional psychotic disorder
- 24 Acute polymorphic psychotic disorder
- 25 Acute polymorphic psychotic disorder with symptoms of schizophrenia
- 26 Nervous breakdown
- 27 Subchronic schizophrenia
- 28 Residual schizophrenia
- 29 Chronic paranoid schizophrenia
- 30 Subchronic catatonic schizophrenia
- 31 Paranoid schizophrenia
- 32 Chronic catatonic schizophrenia
- 33 Subchronic paranoid schizophrenia
- 34 Schizophrenic disorders
- 35 Schizophrenia simplex
- 36 Simple schizophrenia
- 37 Unspecified schizophrenia
- 38 Acute exacerbation of subchronic schizophrenia
- 39 Acute exacerbation of chronic schizophrenia
- 40 Simple schizophrenia NOS
- 41 Unspecified hebephrenic schizophrenia
- 42 Subchronic hebephrenic schizophrenia
- 43 Chronic hebephrenic schizophrenia
- 44 Acute exacerbation of subchronic hebephrenic schizophrenia
- 45 Acute exacerbation of chronic hebephrenic schizophrenia
- 46 Hebephrenic schizophrenia NOS
- 47 Catatonic schizophrenia
- 48 [X]Schizophrenic flexibilatis cerea
- 49 Unspecified catatonic schizophrenia
- 50 Acute exacerbation of subchronic catatonic schizophrenia
- 51 Acute exacerbation of chronic catatonic schizophrenia
- 52 Catatonic schizophrenia NOS
- 53
- 54
- 55
- 56
- 57
- 58
- 59
- 60

1 Unspecified paranoid schizophrenia  
2 Acute exacerbation of subchronic paranoid schizophrenia  
3 Acute exacerbation of chronic paranoid schizophrenia  
4 Paranoid schizophrenia NOS  
5 Latent schizophrenia  
6 Unspecified latent schizophrenia  
7 Subchronic latent schizophrenia  
8 Chronic latent schizophrenia  
9 Acute exacerbation of subchronic latent schizophrenia  
10 Acute exacerbation of chronic latent schizophrenia  
11 Latent schizophrenia NOS  
12 Cyclic schizophrenia  
13 Coenesthopathic schizophrenia  
14 Cenesthopathic schizophrenia  
15 Other schizophrenia NOS  
16 Schizophrenia  
17 [X]Schizophrenia, schizotypal and delusional disorders  
18 Undifferentiated schizophrenia  
19 [X]Schizophrenia, unspecified  
20 [X]Other schizoaffective disorders  
21 [X]Schizoaffective disorder, unspecified  
22 Childhood schizophrenia NOS  
23 Acute schizophrenic episode  
24 Other schizophrenia  
25 [X]Other schizophrenia  
26 Atypical schizophrenia  
27 Chronic schizophrenic  
28 Unspecified schizo-affective schizophrenia  
29 Subchronic schizo-affective schizophrenia  
30 Schizoaffective schizophrenia  
31 Schizo-affective schizophrenia NOS  
32 Restzustand - schizophrenia  
33 [X]Atypical schizophrenia  
34 Borderline schizophrenia  
35 [X]Bouffée délirante with symptoms of schizophrenia  
36 [X]Brief schizophreniform disorder  
37 [X]Brief schizophreniform psychosis  
38 [X]Catatonic schizophrenia  
39 [X]Cenesthopathic schizophrenia  
40 [X]Chronic undifferentiated schizophrenia  
41 [X]Cyclic schizophrenia  
42 [X]Disorganised schizophrenia  
43 [X]Hebephrenic schizophrenia  
44 [X]Latent schizophrenia  
45 [X]Latent schizophrenic reaction  
46 Mixed schizophrenic and affective psychosis  
47 [X]Paranoid schizophrenia  
48 [X]Paraphrenic schizophrenia  
49 [X]Post-schizophrenic depression  
50 Prepsychotic schizophrenia

- 1
- 2 Prodromal schizophrenia
- 3 [X]Pseudoneurotic schizophrenia
- 4 [X]Pseudopsychopathic schizophrenia
- 5 [X]Residual schizophrenia
- 6 [X]Restzustand schizophrenic
- 7 Schizoaffective disorder, depressive type
- 8 Schizoaffective disorder, manic type
- 9 Schizoaffective disorder, mixed type
- 10 Schizoaffective disorder
- 11 [X]Schizoaffective psychosis NOS
- 12 [X]Schizoaffective psychosis, depressive type
- 13 [X]Schizoaffective psychosis, manic type
- 14 [X]Schizoid disorder of childhood
- 15 [X]Schizophrenia
- 16 [X]Schizophrenia-like psychosis in epilepsy
- 17 [X]Schizophrenic catalepsy
- 18 [X]Schizophrenic catatonia
- 19 [X]Schizophrenic reaction
- 20 [X]Schizophreniform disord NOS
- 21 [X]Schizophreniform psychosis, depressive type
- 22 [X]Schizophreniform psychosis, manic type
- 23 [X]Schizophrenifrm psychos NOS
- 24 [X]Simple schizophrenia
- 25 Acute exacerbation of chronic schizo-affective schizophrenia
- 26 Acute exacerbation subchronic schizo-affective schizophrenia
- 27 Chronic schizoaffective schizophrenia
- 28 Hebephrenic schizophrenia
- 29 Schizophrenic psychoses NOS
- 30 Schizophrenic psychoses
- 31 Mental & behav dis due to use opioids: psychotic disorder, schizophrenia-like
- 32 Mental & behav dis due to hallucinogens: psychotic disord, schizophrenia-like
- 33 Mental & behav dis due to cannabinoids: psychotic disordr, schizophrenia-like
- 34 Mental & behav dis due to seds/hypntcs: psychotic disordr, schizophrenia-like
- 35 Mental & behav dis due to vol solvents: psychotic disordr, schizophrenia-like
- 36 Mental & behav dis due to use cocaine: psychotic disorder, schizophrenia-like
- 37 Ment/behav dis mlti drug use/oth psyc sbs: psychotc dis, schizophrenia-like
- 38 Paranoid schizophrenia, continuous
- 39 Paranoid schizophrenia, episodic with progressive deficit
- 40 Paranoid schizophrenia, episodic with stable deficit
- 41 Paranoid schizophrenia, episodic remittent
- 42 Paranoid schizophrenia, incomplete remission
- 43 Paranoid schizophrenia, course uncertain, period of observation too short
- 44 Hebephrenic schizophrenia, continuous
- 45 Hebephrenic schizophrenia, episodic with progressive deficit
- 46 Hebephrenic schizophrenia, episodic with stable deficit
- 47 Hebephrenic schizophrenia, episodic remittent
- 48 Hebephrenic schizophrenia, incomplete remission
- 49 Hebephrenic schizophrenia, course uncertain, period of observation too short
- 50 Catatonic schizophrenia, continuous
- 51 Catatonic schizophrenia, episodic with progressive deficit



1 Catatonic schizophrenia, episodic with stable deficit  
2 Catatonic schizophrenia, episodic remittent  
3 Catatonic schizophrenia, incomplete remission  
4 Catatonic schizophrenia, course uncertain, period of observation too short  
5 Undifferentiated schizophrenia, incomplete remission  
6 Mental & behav dis due to use alcohol: psychotic disorder, schizophrenia-like  
7 Post-schizophrenic depression, continuous  
8 Post-schizophrenic depression, episodic with progressive deficit  
9 Post-schizophrenic depression, episodic with stable deficit  
10 Post-schizophrenic depression, episodic remittent  
11 Post-schizophrenic depression, incomplete remission  
12 Post-schizophrenic depression, complete remission  
13 Post-schizophrenic depression, course uncertain, period of observation too short  
14 Residual schizophrenia, continuous  
15 Residual schizophrenia, episodic with progressive deficit  
16 Residual schizophrenia, episodic with stable deficit  
17 Residual schizophrenia, episodic remittent  
18 Residual schizophrenia, incomplete remission  
19 Residual schizophrenia, course uncertain, period of observation too short  
20 Simple schizophrenia, continuous  
21 Simple schizophrenia, episodic with progressive deficit  
22 Simple schizophrenia, episodic with stable deficit  
23 Simple schizophrenia, episodic remittent  
24 Simple schizophrenia, incomplete remission  
25 Simple schizophrenia, course uncertain, period of observation too short  
26 Other schizophrenia, continuous  
27 Other schizophrenia, episodic with progressive deficit  
28 Other schizophrenia, episodic with stable deficit  
29 Other schizophrenia, episodic remittent  
30 Other schizophrenia, incomplete remission  
31 Other schizophrenia, course uncertain, period of observation too short  
32 Schizophrenia, unspecified, continuous  
33 Schizophrenia, unspecified, episodic with progressive deficit  
34 Schizophrenia, unspecified, episodic with stable deficit  
35 Schizophrenia, unspecified, episodic remittent  
36 Schizophrenia, unspecified, incomplete remission  
37 Schizophrenia, unspecified, course uncertain, period of observation too short  
38 Paranoid schizophrenia, other  
39 Hebephrenic schizophrenia, other  
40 Catatonic schizophrenia, other  
41 Undifferentiated schizophrenia, other  
42 Residual schizophrenia, other  
43 Simple schizophrenia, other  
44 Other schizophrenia, other  
45 Schizophrenia, unspecified, other  
46 Schizotypal disorder  
47 Disorganised schizophrenia  
48 Schizoaffective disorder, bipolar type  
49 Undifferentiated schizophrenia in remission  
50 Chronic schizophrenia

- 1 Schizophreniform disorder
- 2 Schizophrenic reaction
- 3 History of schizophrenia
- 4 Acute exacerbation of chronic disorganised schizophrenia
- 5 Acute exacerbation of subchronic schizoaffective schizophrenia
- 6 Acute exacerbation of chronic schizoaffective schizophrenia
- 7 Post-schizophrenic depression
- 8 Schizophrenic prodrome
- 9 Mixed schizophrenic and affective psychosis
- 10 Late onset schizophrenia
- 11 [X]Schizophrenia, schizotypal and delusional disorders
- 12 Brief reactive psychosis
- 13 Disintegrative psychosis
- 14 Korsakov's alcoholic psychosis with peripheral neuritis
- 15 Other alcoholic psychosis
- 16 Other alcoholic psychosis NOS
- 17 Alcoholic psychosis NOS
- 18 Drug psychosis NOS
- 19 Postpartum psychosis
- 20 Chronic organic psychosis NOS
- 21 Affective psychosis
- 22 Other affective psychosis NOS
- 23 Paranoid psychosis
- 24 Reactive depressive psychosis
- 25 Psychogenic paranoid psychosis
- 26 Disintegrative psychosis NOS
- 27 Borderline psychosis of childhood
- 28 Presbyophrenic psychosis
- 29 Chronic paranoid psychosis
- 30 Non-organic psychosis NOS
- 31 Child psychosis NOS
- 32 [X]Unspecified nonorganic psychosis
- 33 [V]Personal history of manic-depressive psychosis
- 34 [X]Paranoid psychosis
- 35 Manic psychosis
- 36 Non-organic psychosis
- 37 H/O: psychosis
- 38 Referral to psychosis early intervention service
- 39 [X] Presenile psychosis NOS
- 40 [X] Senile psychosis NOS
- 41 [X]Affective psychosis NOS
- 42 [X]Alcoholic psychosis NOS
- 43 [X]Atypical childhood psychosis
- 44 Psychosis and severe depression co-occurrent and due to bipolar affective disorder
- 45 [X]Brief reactive psychosis NOS
- 46 [X]Chronic hallucinatory psychosis
- 47 [X]Cycloid psychosis
- 48 Cycloid psychosis
- 49 [X]Disintegrative psychosis
- 50 [X]Epileptic psychosis NOS

1 [X]Hysterical psychosis  
2 [X]Infantile psychosis  
3 Korsakoff's psychosis  
4 [X]Korsakov's psychosis, nonalcoholic  
5 [X] Manic-depressive psychosis, depressed type without psychotic symptoms  
6 [X]Manic-depress psychosis,depressed type+psychotic symptoms  
7 Manic-depressive psychosis  
8 Cannabis-induced psychosis  
9 Alcohol-induced psychosis  
10 Cocaine-induced psychosis  
11 Opioid-induced psychosis  
12 Volatile inhalant-induced psychosis  
13 [X]Organic psychosis NOS  
14 [X]Psychogenic paranoid psychosis  
15 [X]Puerperal psychosis NOS  
16 [X]Reactive psychosis  
17 [X]Single episode of psychogenic depressive psychosis  
18 [X]Single episode of reactive depressive psychosis  
19 [X]Symbiotic psychosis  
20 Alcohol-induced psychosis  
21 Drug psychosis  
22 Korsakov alcoholic psychosis  
23 Obsessional compulsive psychosis  
24 Possible early psychosis  
25 CBTp - cognitive behavioural therapy for psychosis  
26 Induced psychosis  
27 Psychosis  
28 Korsakoff psychosis  
29 Korsakov psychosis  
30 Drug-induced psychosis  
31 Drug induced psychosis  
32 Psychosis with origin in childhood  
33 Epileptic psychosis  
34 Psychosis associated with intensive care  
35 Mild postnatal psychosis  
36 Senile dementia with psychosis  
37 Early intervention in psychosis  
38 Early intervention in psychosis - <1 contact/month  
39 Cognitive behavioural therapy for psychosis  
40 Psychosis co-occurrent and due to Parkinson's disease  
41 Provision of information about psychosis  
42 Early intervention in psychosis team  
43 Reactive depressive psychosis, single episode  
44 Psychoactive substance-induced psychosis  
45 Family intervention for psychosis  
46 Referral for cognitive behavioural therapy for psychosis  
47 FEP - first episode psychosis  
48 Family intervention for psychosis and bipolar disorder  
49 Mania  
50 Mania/hypomania

1  
2 Mania with mood-incongruent psychotic features  
3 Mania with psychotic features  
4 Single manic episode, unspecified  
5 Single manic episode, mild  
6 Single manic episode, moderate  
7 Single manic episode, severe  
8 Single manic episode in partial remission  
9 Manic disorder, single episode NOS  
10 Recurrent manic episodes  
11 Recurrent manic episodes, unspecified  
12 Recurrent manic episodes, mild  
13 Recurrent manic episodes, moderate  
14 Recurrent manic episode NOS  
15 Manic-depressive - now manic  
16 Bipolar affective disorder, currently manic, unspecified  
17 Bipolar affective disorder, currently manic, mild  
18 Bipolar affective disorder, currently manic, moderate  
19 Bipolar affective disorder, currently manic, NOS  
20 Manic-depressive - now depressed  
21 Other and unspecified manic-depressive psychoses  
22 Unspecified manic-depressive psychoses  
23 Atypical manic disorder  
24 Other and unspecified manic-depressive psychoses NOS  
25 [X]Other manic episodes  
26 Manic disorder, single episode  
27 [X]Manic episode, unspecified  
28 H/O: manic depressive disorder  
29 Manic mood  
30 Recurrent manic episodes, in partial remission  
31 Recurrent manic episodes, severe  
32 [X]Bipolar affect disorder cur epi manic wout psychotic symp  
33 Bipolar affective disorder, current episode hypomanic  
34 [X]Bipolar disorder, single manic episode  
35 [X]Manic-depressive reaction  
36 [X]Manic episode  
37 [X]Manic stupor  
38 Manic-depressive illness  
39 [X]Recurrent manic episodes  
40 Manic bipolar I disorder in partial remission  
41 Bipolar affective disorder, current episode manic  
42 Hypomanic psychoses  
43 Hypomanic  
44 Manic-depressive psychoses  
45 Mental & behav dis due to use opioids: psychotic disorder, predominantly manic symptoms  
46 Organic manic disorder  
47 Mental & behav dis due to cannabinoids: psychotic disorder, predominantly manic symptoms  
48 Mental & behav dis due to sedatives/hypnotics: psychotic disorder, predominantly manic symptoms  
49 Mental & behav dis due to hallucinogens: psychotic disorder, predominantly manic symptoms  
50 Mental & behav dis due to volatile solvents: psychotic disorder, predominantly manic symptoms  
51 Mental & behav dis due to use cocaine: psychotic disorder, predominantly manic symptoms

1 Ment/behav dis mlti drug use/oth psyc sbs: psychotc dis, predominantly manic symptoms  
2 Mental & behav dis due to use tobacco: psychotic disorder, predominantly manic symptoms  
3 Mental & behav dis due to use alcohol: psychotic disorder, predominantly manic symptoms  
4 Mental and behav dis due to other stimulants inc caffeine: psychotic dis, predominantly manic symptom  
5  
6 Bipolar I disorder, most recent episode hypomanic  
7  
8 Organic mood disorder of manic type  
9 Manic  
10 Hypomanic mood  
11 Manic behaviour  
12 Manic behavior  
13 Bipolar disorder, most recent episode manic  
14 Bipolar affective disorder, currently depressed, unspecified  
15 Bipolar affective disorder, currently depressed, mild  
16 Bipolar affective disorder, currently depressed, moderate  
17 Bipolar affective disorder, currently depressed, NOS  
18 Mixed bipolar affective disorder  
19 Mixed bipolar affective disorder, unspecified  
20 Mixed bipolar affective disorder, mild  
21 Mixed bipolar affective disorder, moderate  
22 Mixed bipolar affective disorder, NOS  
23 Unspecified bipolar affective disorder  
24 Unspecified bipolar affective disorder, unspecified  
25 Mild bipolar disorder  
26 Moderate bipolar disorder  
27 Unspecified bipolar affective disorder, NOS  
28 Mixed bipolar I disorder  
29 [X]Bipolar affective disorder, unspecified  
30 [X]Other bipolar affective disorders  
31 Bipolar disorder in partial remission  
32 [X]Bipolar affect disorder cur epi mild or moderate depressn  
33 Bipolar affective disorder  
34 [X]Bipolar affective disorder, current episode mixed  
35 [X]Bipolar II disorder  
36 Bipolar affective disorder , current episode mixed  
37 Depressed bipolar I disorder in partial remission  
38 Bipolar affective disorder, current episode depression  
39 Bipolar disorder  
40 Mixed bipolar affective disorder, partial/unspec remission  
41 Mixed bipolar affective disorder, severe  
42 Bipolar I disorder  
43 Bipolar II disorder  
44 [X]Bipolar II disorder  
45 Organic bipolar affective disorder  
46 Bipolar affect disorder cur epi mild or moderate depressn, without somatic syndrome  
47 Bipolar affect disorder cur epi mild or moderate depressn, with somatic syndrome  
48 Signposting to Bipolar UK  
49 Bipolar 2 disorder  
50 Bipolar affective disorder, current episode mixed  
51 Organic bipolar disorder  
52 Bipolar

1  
2 Profile of mood states, bipolar  
3 Referral for bipolar disorder  
4 Rapid cycling bipolar I disorder  
5 Mixed bipolar affective disorder, in partial remission  
6 Bipolar disorder, most recent episode depression  
7 Bipolar affective disorder, most recent episode mixed  
8 Bipolar disorder caused by drug  
9 Rapid cycling bipolar II disorder  
10 Thoughts of deliberate self harm  
11 Intent of deliberate self harm with detailed plans  
12 Risk of deliberate self harm  
13 H/O: deliberate self harm outside prison  
14 H/O: deliberate self harm within prison  
15 High risk of deliberate self harm  
16 Thoughts of self harm  
17 Suicide and self harm  
18 History of deliberate self harm  
19 At risk for deliberate self harm  
20 Obsessional thoughts of causing self harm  
21 Self-induced vomiting  
22 Self-induced purging to lose weight  
23 Self-induced purging  
24 OCD - Obsessive-compulsive disorder  
25 Obsessive-compulsive disorder NOS  
26 [X]Other obsessive-compulsive disorders  
27 [X]Obsessive-compulsive disorder, unspecified  
28 Obsessive-compulsive disorder  
29 [X]Obsessive - compulsive disorder  
30 Obsessive compulsive disorder  
31 Anorexia nervosa  
32 H/O: anorexia nervosa  
33 [D]Anorexia  
34 [D]Anorexia NOS  
35 Anorexia symptom  
36 [X]Anorexia nervosa  
37 Atypical anorexia nervosa  
38 Anorexia  
39 AN - Anorexia nervosa  
40 Anorexia  
41 Anorexic  
42 [D]Anorexia  
43 Bulimia  
44 Atypical bulimia nervosa  
45 Bulimia nervosa  
46 [X]Bulimia NOS  
47 Bulimia (non-organic overeating)  
48 Bulimia nervosa, purging type  
49 Bulimia nervosa, nonpurging type  
50 History of bulimia nervosa  
51 Other and unspecified non-organic eating disorders

1 Unspecified non-organic eating disorder  
2 Other specified non-organic eating disorder  
3 Non-organic eating disorder NOS  
4 Eating disorder  
5 [X]Eating disorder, unspecified  
6 [X]Other eating disorders  
7 Referral to eating disorders clinic  
8 Compulsive eating disorder  
9 Seen in eating disorder clinic  
10 Eating disorder NOS - psychog.  
11 Eating disorder NOS - psychog.  
12 Eating disorders  
13 Seen in eating disorders clinic  
14 Referral to eating disorders outreach clinic  
15 Reason for referral: Eating Disorder  
16 FACE CARAS - Eating Disorder Schedule (FEDS)  
17 Suspected binge eating disorder  
18 Eating disorder care plan  
19 Signposting to Beat (beating eating disorders) support group  
20 Eating disorders inventory  
21 Eating disorder counselling  
22 Eating disorders management  
23 Dietary education for eating disorder  
24 Binge eating disorder  
25 Eating disorder clinic  
26 Eating disorders service  
27 Eating disorder co-occurrent with diabetes mellitus type 1  
28 Group CBT-ED (cognitive behavioural therapy for eating disorder)  
29  
30  
31  
32  
33  
34  
35  
36  
37  
38  
39  
40  
41  
42  
43  
44  
45  
46  
47  
48  
49  
50  
51  
52  
53  
54  
55  
56  
57  
58  
59  
60

1  
2  
3  
4  
5  
6  
7  
8  
9  
10  
11  
12  
13  
14  
15  
16  
17  
18  
19  
20  
21  
22  
23  
24  
25  
26  
27  
28  
29  
30  
31  
32  
33  
34  
35  
36  
37  
38  
39  
40  
41  
42  
43  
44  
45  
46  
47  
48  
49  
50  
51  
52  
53  
54  
55  
56  
57  
58  
59  
60

For peer review only



1  
2  
3  
4  
5  
6  
7  
8  
9  
10  
11  
12  
13  
14  
15  
16  
17  
18  
19  
20  
21  
22  
23  
24  
25  
26  
27  
28  
29  
30  
31  
32  
33  
34  
35  
36  
37  
38  
39  
40  
41  
42  
43  
44  
45  
46  
47  
48  
49  
50  
51  
52  
53  
54  
55  
56  
57  
58  
59  
60

For peer review only

1  
2  
3  
4  
5  
6  
7  
8  
9  
10  
11  
12  
13  
14  
15  
16  
17  
18  
19  
20  
21  
22  
23  
24  
25  
26  
27  
28  
29  
30  
31  
32  
33  
34  
35  
36  
37  
38  
39  
40  
41  
42  
43  
44  
45  
46  
47  
48  
49  
50  
51  
52  
53  
54  
55  
56  
57  
58  
59  
60

For peer review only

1  
2  
3  
4  
5  
6  
7  
8  
9  
10  
11  
12  
13  
14  
15  
16  
17  
18  
19  
20  
21  
22  
23  
24  
25  
26  
27  
28  
29  
30  
31  
32  
33  
34  
35  
36  
37  
38  
39  
40  
41  
42  
43  
44  
45  
46  
47  
48  
49  
50  
51  
52  
53  
54  
55  
56  
57  
58  
59  
60

For peer review only

1  
2  
3  
4  
5  
6  
7  
8  
9  
10  
11  
12  
13  
14  
15  
16  
17  
18  
19  
20  
21  
22  
23  
24  
25  
26  
27  
28  
29  
30  
31  
32  
33  
34  
35  
36  
37  
38  
39  
40  
41  
42  
43  
44  
45  
46  
47  
48  
49  
50  
51  
52  
53  
54  
55  
56  
57  
58  
59  
60

For peer review only

1  
2  
3  
4  
5  
6  
7  
8  
9  
10  
11  
12  
13  
14  
15  
16  
17  
18  
19  
20  
21  
22  
23  
24  
25  
26  
27  
28  
29  
30  
31  
32  
33  
34  
35  
36  
37  
38  
39  
40  
41  
42  
43  
44  
45  
46  
47  
48  
49  
50  
51  
52  
53  
54  
55  
56  
57  
58  
59  
60

For peer review only

1  
2  
3  
4  
5  
6  
7  
8  
9  
10  
11  
12  
13  
14  
15  
16  
17  
18  
19  
20  
21  
22  
23  
24  
25  
26  
27  
28  
29  
30  
31  
32  
33  
34  
35  
36  
37  
38  
39  
40  
41  
42  
43  
44  
45  
46  
47  
48  
49  
50  
51  
52  
53  
54  
55  
56  
57  
58  
59  
60

For peer review only

1  
2  
3  
4  
5  
6  
7  
8  
9  
10  
11  
12  
13  
14  
15  
16  
17  
18  
19  
20  
21  
22  
23  
24  
25  
26  
27  
28  
29  
30  
31  
32  
33  
34  
35  
36  
37  
38  
39  
40  
41  
42  
43  
44  
45  
46  
47  
48  
49  
50  
51  
52  
53  
54  
55  
56  
57  
58  
59  
60

For peer review only

1  
2  
3  
4  
5  
6  
7  
8  
9  
10  
11  
12  
13  
14  
15  
16  
17  
18  
19  
20  
21  
22  
23  
24  
25  
26  
27  
28  
29  
30  
31  
32  
33  
34  
35  
36  
37  
38  
39  
40  
41  
42  
43  
44  
45  
46  
47  
48  
49  
50  
51  
52  
53  
54  
55  
56  
57  
58  
59  
60

ms

For peer review only



|    |             |
|----|-------------|
| 1  |             |
| 2  | ICD-10 code |
| 3  | F06.0       |
| 4  | F06.1       |
| 5  | F06.2       |
| 6  | F06.3       |
| 7  | F06.4       |
| 8  | F06.5       |
| 9  | F06.6       |
| 10 | F06.6       |
| 11 | F10.1       |
| 12 | F10.2       |
| 13 | F10.3       |
| 14 | F10.4       |
| 15 | F10.5       |
| 16 | F10.6       |
| 17 | F10.7       |
| 18 | F10.8       |
| 19 | F10.9       |
| 20 | F10.9       |
| 21 | F11.1       |
| 22 | F11.2       |
| 23 | F11.3       |
| 24 | F11.4       |
| 25 | F11.5       |
| 26 | F11.6       |
| 27 | F11.7       |
| 28 | F11.8       |
| 29 | F11.9       |
| 30 | F11.9       |
| 31 | F12.1       |
| 32 | F12.2       |
| 33 | F12.3       |
| 34 | F12.4       |
| 35 | F12.5       |
| 36 | F12.6       |
| 37 | F12.7       |
| 38 | F12.8       |
| 39 | F12.9       |
| 40 | F12.9       |
| 41 | F13.1       |
| 42 | F13.2       |
| 43 | F13.3       |
| 44 | F13.4       |
| 45 | F13.5       |
| 46 | F13.6       |
| 47 | F13.7       |
| 48 | F13.8       |
| 49 | F13.9       |
| 50 | F13.9       |
| 51 | F14.1       |
| 52 | F14.2       |
| 53 | F14.3       |
| 54 | F14.4       |
| 55 | F14.5       |
| 56 | F14.6       |
| 57 | F14.6       |
| 58 | F14.6       |
| 59 | F14.6       |
| 60 | F14.6       |

For peer review only

|    |       |
|----|-------|
| 1  |       |
| 2  | F14.7 |
| 3  | F14.8 |
| 4  | F14.9 |
| 5  | F15.1 |
| 6  | F15.2 |
| 7  | F15.3 |
| 8  | F15.4 |
| 9  | F15.5 |
| 10 | F15.6 |
| 11 | F15.7 |
| 12 | F15.8 |
| 13 | F15.9 |
| 14 | F16.1 |
| 15 | F16.2 |
| 16 | F16.3 |
| 17 | F16.4 |
| 18 | F16.5 |
| 19 | F16.6 |
| 20 | F16.7 |
| 21 | F16.8 |
| 22 | F16.9 |
| 23 | F17.1 |
| 24 | F17.2 |
| 25 | F17.3 |
| 26 | F17.4 |
| 27 | F17.5 |
| 28 | F17.6 |
| 29 | F17.7 |
| 30 | F17.8 |
| 31 | F17.9 |
| 32 | F18.1 |
| 33 | F18.2 |
| 34 | F18.3 |
| 35 | F18.4 |
| 36 | F18.5 |
| 37 | F18.6 |
| 38 | F18.7 |
| 39 | F18.8 |
| 40 | F18.9 |
| 41 | F19.1 |
| 42 | F19.2 |
| 43 | F19.3 |
| 44 | F19.4 |
| 45 | F19.5 |
| 46 | F19.6 |
| 47 | F19.7 |
| 48 | F19.8 |
| 49 | F19.9 |
| 50 | F20.0 |
| 51 | F20.1 |

For peer review only

1  
2 F20.2  
3 F20.3  
4 F20.4  
5 F20.5  
6 F20.6  
7 F20.8  
8 F20.9  
9 F21  
10 F22.0  
11 F22.8  
12 F22.9  
13 F23.0  
14 F23.1  
15 F23.2  
16 F23.3  
17 F23.8  
18 F23.9  
19 F24  
20 F25.0  
21 F25.1  
22 F25.2  
23 F25.8  
24 F25.9  
25 F28  
26 F29  
27 F30.0  
28 F30.1  
29 F30.2  
30 F30.8  
31 F30.9  
32 F31.0  
33 F31.1  
34 F31.2  
35 F31.3  
36 F31.4  
37 F31.5  
38 F31.6  
39 F31.7  
40 F31.8  
41 F31.9  
42 F32.2  
43 F32.3  
44 F32.8  
45 F32.9  
46 F33.2  
47 F33.3  
48 F33.8  
49 F33.9  
50 F34.0  
51 F34.1  
52  
53  
54  
55  
56  
57  
58  
59  
60

For peer review only

- 1
- 2 F34.8
- 3 F34.9
- 4 F38.0
- 5 F38.1
- 6 F38.8
- 7 F38.8
- 8 F39
- 9 F41.0
- 10 F41.1
- 11 F41.2
- 12 F41.3
- 13 F41.8
- 14 F41.9
- 15 F41.9
- 16 F42.0
- 17 F42.1
- 18 F42.2
- 19 F42.2
- 20 F42.8
- 21 F42.9
- 22 F43.1
- 23 F44.0
- 24 F44.1
- 25 F44.1
- 26 F44.2
- 27 F44.3
- 28 F44.4
- 29 F44.5
- 30 F44.6
- 31 F44.6
- 32 F44.7
- 33 F44.8
- 34 F44.9
- 35 F48.1
- 36 F48.8
- 37 F48.8
- 38 F48.9
- 39 F50.0
- 40 F50.1
- 41 F50.2
- 42 F50.3
- 43 F50.3
- 44 F50.8
- 45 F50.9
- 46 F53.1
- 47 F53.8
- 48 F53.8
- 49 F53.9
- 50
- 51
- 52
- 53
- 54
- 55
- 56
- 57
- 58
- 59
- 60

For peer review only

1  
2 Term

3 Organic hallucinosis

4 Organic catatonic disorder

5 Organic delusional [schizophrenia-like] disorder

6 Organic mood [affective] disorders

7 Organic anxiety disorder

8 Organic dissociative disorder

9 Organic emotionally labile [asthenic] disorder

10 Mental and behavioural disorders due to use of alcohol harmful use

11 Mental and behavioural disorders due to use of alcohol dependence syndrome

12 Mental and behavioural disorders due to use of alcohol withdrawal state

13 Mental and behavioural disorders due to use of alcohol withdrawal state with delirium

14 Mental and behavioural disorders due to use of alcohol psychotic disorder

15 Mental and behavioural disorders due to use of alcohol amnesic syndrome

16 Mental and behavioural disorders due to use of alcohol residual and late-onset psychotic disorder

17 Mental and behavioural disorders due to use of alcohol other mental and behavioural disorders

18 Mental and behavioural disorders due to use of alcohol unspecified mental and behavioural disorders

19 Mental and behavioural disorders due to use of opioids harmful use

20 Mental and behavioural disorders due to use of opioids dependence syndrome

21 Mental and behavioural disorders due to use of opioids withdrawal state

22 Mental and behavioural disorders due to use of opioids withdrawal state with delirium

23 Mental and behavioural disorders due to use of opioids psychotic disorder

24 Mental and behavioural disorders due to use of opioids amnesic syndrome

25 Mental and behavioural disorders due to use of opioids residual and late-onset psychotic disorder

26 Mental and behavioural disorders due to use of opioids other mental and behavioural disorders

27 Mental and behavioural disorders due to use of opioids unspecified mental and behavioural disorders

28 Mental and behavioural disorders due to use of cannabinoids harmful use

29 Mental and behavioural disorders due to use of cannabinoids dependence syndrome

30 Mental and behavioural disorders due to use of cannabinoids withdrawal state

31 Mental and behavioural disorders due to use of cannabinoids withdrawal state with delirium

32 Mental and behavioural disorders due to use of cannabinoids psychotic disorder

33 Mental and behavioural disorders due to use of cannabinoids amnesic syndrome

34 Mental and behavioural disorders due to use of cannabinoids residual and late-onset psychotic disorder

35 Mental and behavioural disorders due to use of cannabinoids other mental and behavioural disorders

36 Mental and behavioural disorders due to use of cannabinoids unspecified mental and behavioural disorders

37 Mental and behavioural disorders due to use of sedatives or hypnotics harmful use

38 Mental and behavioural disorders due to use of sedatives or hypnotics dependence syndrome

39 Mental and behavioural disorders due to use of sedatives or hypnotics withdrawal state

40 Mental and behavioural disorders due to use of sedatives or hypnotics withdrawal state with delirium

41 Mental and behavioural disorders due to use of sedatives or hypnotics psychotic disorder

42 Mental and behavioural disorders due to use of sedatives or hypnotics amnesic syndrome

43 Mental and behavioural disorders due to use of sedatives or hypnotics residual and late-onset psychotic disorder

44 Mental and behavioural disorders due to use of sedatives or hypnotics other mental and behavioural disorders

45 Mental and behavioural disorders due to use of sedatives or hypnotics unspecified mental and behavioural disorders

46 Mental and behavioural disorders due to use of cocaine harmful use

47 Mental and behavioural disorders due to use of cocaine dependence syndrome

48 Mental and behavioural disorders due to use of cocaine withdrawal state

49 Mental and behavioural disorders due to use of cocaine withdrawal state with delirium

50 Mental and behavioural disorders due to use of cocaine psychotic disorder

51 Mental and behavioural disorders due to use of cocaine amnesic syndrome

- 1 Mental and behavioural disorders due to use of cocaine residual and late-onset psychotic disorder
- 2 Mental and behavioural disorders due to use of cocaine other mental and behavioural disorders
- 3 Mental and behavioural disorders due to use of cocaine unspecified mental and behavioural disorders
- 4 Mental and behavioural disorders due to use of other stimulants, including caffeine harmful use
- 5 Mental and behavioural disorders due to use of other stimulants, including caffeine dependence syndrome
- 6 Mental and behavioural disorders due to use of other stimulants, including caffeine withdrawal state
- 7 Mental and behavioural disorders due to use of other stimulants, including caffeine withdrawal state with deli
- 8 Mental and behavioural disorders due to use of other stimulants, including caffeine psychotic disorder
- 9 Mental and behavioural disorders due to use of other stimulants, including caffeine amnesic syndrome
- 10 Mental and behavioural disorders due to use of other stimulants, including caffeine residual and late-onset py
- 11 Mental and behavioural disorders due to use of other stimulants, including caffeine other mental and behavio
- 12 Mental and behavioural disorders due to use of other stimulants, including caffeine unspecified mental and be
- 13 Mental and behavioural disorders due to use of hallucinogens harmful use
- 14 Mental and behavioural disorders due to use of hallucinogens dependence syndrome
- 15 Mental and behavioural disorders due to use of hallucinogens withdrawal state
- 16 Mental and behavioural disorders due to use of hallucinogens withdrawal state with delirium
- 17 Mental and behavioural disorders due to use of hallucinogens psychotic disorder
- 18 Mental and behavioural disorders due to use of hallucinogens amnesic syndrome
- 19 Mental and behavioural disorders due to use of hallucinogens residual and late-onset psychotic disorder
- 20 Mental and behavioural disorders due to use of hallucinogens other mental and behavioural disorders
- 21 Mental and behavioural disorders due to use of hallucinogens unspecified mental and behavioural disorders
- 22 Mental and behavioural disorders due to use of tobacco harmful use
- 23 Mental and behavioural disorders due to use of tobacco dependence syndrome
- 24 Mental and behavioural disorders due to use of tobacco withdrawal state
- 25 Mental and behavioural disorders due to use of tobacco withdrawal state with delirium
- 26 Mental and behavioural disorders due to use of tobacco psychotic disorder
- 27 Mental and behavioural disorders due to use of tobacco amnesic syndrome
- 28 Mental and behavioural disorders due to use of tobacco residual and late-onset psychotic disorder
- 29 Mental and behavioural disorders due to use of tobacco other mental and behavioural disorders
- 30 Mental and behavioural disorders due to use of tobacco unspecified mental and behavioural disorders
- 31 Mental and behavioural disorders due to use of volatile solvents harmful use
- 32 Mental and behavioural disorders due to use of volatile solvents dependence syndrome
- 33 Mental and behavioural disorders due to use of volatile solvents withdrawal state
- 34 Mental and behavioural disorders due to use of volatile solvents withdrawal state with delirium
- 35 Mental and behavioural disorders due to use of volatile solvents psychotic disorder
- 36 Mental and behavioural disorders due to use of volatile solvents amnesic syndrome
- 37 Mental and behavioural disorders due to use of volatile solvents residual and late-onset psychotic disorder
- 38 Mental and behavioural disorders due to use of volatile solvents other mental and behavioural disorders
- 39 Mental and behavioural disorders due to use of volatile solvents unspecified mental and behavioural disorders
- 40 Mental and behavioural disorders due to multiple drug use and use of other psychoactive substances harmful
- 41 Mental and behavioural disorders due to multiple drug use and use of other psychoactive substances depende
- 42 Mental and behavioural disorders due to multiple drug use and use of other psychoactive substances withdraw
- 43 Mental and behavioural disorders due to multiple drug use and use of other psychoactive substances psychoti
- 44 Mental and behavioural disorders due to multiple drug use and use of other psychoactive substances amnesic
- 45 Mental and behavioural disorders due to multiple drug use and use of other psychoactive substances residual
- 46 Mental and behavioural disorders due to multiple drug use and use of other psychoactive substances other m
- 47 Mental and behavioural disorders due to multiple drug use and use of other psychoactive substances unspecif
- 48 Paranoid schizophrenia
- 49 Hebephrenic schizophrenia
- 50
- 51
- 52
- 53
- 54
- 55
- 56
- 57
- 58
- 59
- 60

1 Catatonic schizophrenia  
2 Undifferentiated schizophrenia  
3 Post-schizophrenic depression  
4 Residual schizophrenia  
5 Simple schizophrenia  
6 Other schizophrenia  
7 Schizophrenia, unspecified  
8 Schizotypal disorder  
9 Delusional disorder  
10 Other persistent delusional disorders  
11 Persistent delusional disorder, unspecified  
12 Acute polymorphic psychotic disorder without symptoms of schizophrenia  
13 Acute polymorphic psychotic disorder with symptoms of schizophrenia  
14 Acute schizophrenia-like psychotic disorder  
15 Other acute predominantly delusional psychotic disorders  
16 Other acute and transient psychotic disorders  
17 Acute and transient psychotic disorder, unspecified  
18 Induced delusional disorder  
19 Schizoaffective disorder, manic type  
20 Schizoaffective disorder, depressive type  
21 Schizoaffective disorder, mixed type  
22 Other schizoaffective disorders  
23 Schizoaffective disorder, unspecified  
24 Other nonorganic psychotic disorders  
25 Unspecified nonorganic psychosis  
26 Hypomania  
27 Mania without psychotic symptoms  
28 Mania with psychotic symptoms  
29 Other manic episodes  
30 Manic episode, unspecified  
31 Bipolar affective disorder, current episode hypomanic  
32 Bipolar affective disorder, current episode manic without psychotic symptoms  
33 Bipolar affective disorder, current episode manic with psychotic symptoms  
34 Bipolar affective disorder, current episode mild or moderate depression  
35 Bipolar affective disorder, current episode severe depression without psychotic symptoms  
36 Bipolar affective disorder, current episode severe depression with psychotic symptoms  
37 Bipolar affective disorder, current episode mixed  
38 Bipolar affective disorder, currently in remission  
39 Other bipolar affective disorders  
40 Bipolar affective disorder, unspecified  
41 Severe depressive episode without psychotic symptoms  
42 Severe depressive episode with psychotic symptoms  
43 Other depressive episodes  
44 Depressive episode, unspecified  
45 Recurrent depressive disorder, current episode severe without psychotic symptoms  
46 Recurrent depressive disorder, current episode severe with psychotic symptoms  
47 Other recurrent depressive disorders  
48 Recurrent depressive disorder, unspecified  
49 Cyclothymia  
50 Dysthymia

- 1
- 2 Other persistent mood [affective] disorders
- 3 Persistent mood [affective] disorder, unspecified
- 4 Other single mood [affective] disorders
- 5 Other recurrent mood [affective] disorders
- 6 Other specified mood [affective] disorders
- 7 Unspecified mood [affective] disorder
- 8 Panic disorder [episodic paroxysmal anxiety]
- 9 Generalized anxiety disorder
- 10 Mixed anxiety and depressive disorder
- 11 Other mixed anxiety disorders
- 12 Other specified anxiety disorders
- 13 Anxiety disorder, unspecified
- 14 Predominantly obsessional thoughts or ruminations
- 15 Predominantly compulsive acts [obsessional rituals]
- 16 Mixed obsessional thoughts and acts
- 17 Other obsessive-compulsive disorders
- 18 Obsessive-compulsive disorder, unspecified
- 19 Post-traumatic stress disorder
- 20 Dissociative amnesia
- 21 Dissociative fugue
- 22 Dissociative stupor
- 23 Trance and possession disorders
- 24 Dissociative motor disorders
- 25 Dissociative convulsions
- 26 Dissociative anaesthesia and sensory loss
- 27 Mixed dissociative [conversion] disorders
- 28 Other dissociative [conversion] disorders
- 29 Dissociative [conversion] disorder, unspecified
- 30 Depersonalization-derealization syndrome
- 31 Other specified neurotic disorders
- 32 Neurotic disorder, unspecified
- 33 Anorexia nervosa
- 34 Atypical anorexia nervosa
- 35 Bulimia nervosa
- 36 Atypical bulimia nervosa
- 37 Other eating disorders
- 38 Eating disorder, unspecified
- 39 Severe mental and behavioural disorders associated with the puerperium, not elsewhere classified
- 40 Other mental and behavioural disorders associated with the puerperium, not elsewhere classified
- 41 Puerperal mental disorder, unspecified
- 42
- 43
- 44
- 45
- 46
- 47
- 48
- 49
- 50
- 51
- 52
- 53
- 54
- 55
- 56
- 57
- 58
- 59
- 60



1  
2  
3  
4  
5  
6  
7  
8  
9  
10  
11  
12  
13  
14  
15  
16  
17  
18  
19  
20  
21  
22  
23  
24  
25  
26  
27  
28  
29  
30  
31  
32  
33  
34  
35  
36  
37  
38  
39  
40  
41  
42  
43  
44  
45  
46  
47  
48  
49  
50  
51  
52  
53  
54  
55  
56  
57  
58  
59  
60

For peer review only

1  
2  
3  
4  
5  
6  
7  
8  
9  
10  
11  
12  
13  
14  
15  
16  
17  
18  
19  
20  
21  
22  
23  
24  
25  
26  
27  
28  
29  
30  
31  
32  
33  
34  
35  
36  
37  
38  
39  
40  
41  
42  
43  
44  
45  
46  
47  
48  
49  
50  
51  
52  
53  
54  
55  
56  
57  
58  
59  
60

For peer review only

r  
orders

| 1  | Medcodeid | Term                                                            |
|----|-----------|-----------------------------------------------------------------|
| 2  | 17279018  | Ovarian pregnancy                                               |
| 3  | 27701016  | Multiple pregnancy                                              |
| 4  | 58080013  | Ectopic pregnancy                                               |
| 5  | 59478019  | Intraligamentous pregnancy                                      |
| 6  | 97258010  | Unwanted pregnancy                                              |
| 7  | 101047019 | Quadruplet pregnancy                                            |
| 8  | 106809012 | Triplet pregnancy                                               |
| 9  | 108265019 | Twin pregnancy                                                  |
| 10 | 115533013 | Mural pregnancy                                                 |
| 11 | 131553011 | Cervical pregnancy                                              |
| 12 | 132037019 | Tubal pregnancy                                                 |
| 13 | 137128014 | Abdominal pregnancy                                             |
| 14 | 145245010 | Cornual pregnancy                                               |
| 15 | 258639017 | Serum pregnancy test positive                                   |
| 16 | 259782016 | Urine pregnancy test positive                                   |
| 17 | 262993014 | Pregnant, IUD failure                                           |
| 18 | 262994015 | IUD failure - pregnant                                          |
| 19 | 263013015 | Pregnant, diaphragm failure                                     |
| 20 | 263026016 | Pregnant, sheath failure                                        |
| 21 | 263100011 | Pregnant - urine test confirms                                  |
| 22 | 263101010 | Pregnant - blood test confirms                                  |
| 23 | 263102015 | Pregnant - V.E. confirms                                        |
| 24 | 263103013 | Pregnant - on history                                           |
| 25 | 263104019 | Pregnant - on abdominal palpation                               |
| 26 | 263105018 | Pregnant - planned                                              |
| 27 | 263107014 | Pregnant - unplanned - wanted                                   |
| 28 | 263108016 | Pregnant -unplanned-not wanted                                  |
| 29 | 263109012 | Unplanned pregnancy unknown if child is wanted                  |
| 30 | 263112010 | Patient pregnant NOS                                            |
| 31 | 263115012 | Antenatal care: 2nd pregnancy                                   |
| 32 | 263116013 | Antenatal care: 3rd pregnancy                                   |
| 33 | 263128017 | A/N care: precious pregnancy                                    |
| 34 | 283737019 | Referral for counselling for termination of pregnancy           |
| 35 | 284238018 | Requests pregnancy termination                                  |
| 36 | 305296013 | Tubal pregnancy NOS                                             |
| 37 | 305297016 | Other ectopic pregnancy                                         |
| 38 | 305298014 | Membranous pregnancy                                            |
| 39 | 305300014 | Mesenteric pregnancy                                            |
| 40 | 305301013 | Angular pregnancy                                               |
| 41 | 305303011 | Other ectopic pregnancy NOS                                     |
| 42 | 305304017 | Ectopic pregnancy NOS                                           |
| 43 | 305887017 | False labour at or after 37 completed weeks of gestation        |
| 44 | 305908014 | Post-term pregnancy unspecified                                 |
| 45 | 305910011 | Post-term pregnancy - not delivered                             |
| 46 | 305911010 | Post-term pregnancy NOS                                         |
| 47 | 305912015 | Prolonged pregnancy NOS                                         |
| 48 | 306209019 | Continuing pregnancy after abortion of one fetus or more        |
| 49 | 306210012 | Continuing pregnancy after intrauterine death one fetus or more |
| 50 | 306222010 | Twin pregnancy unspecified                                      |

|    |                 |                                                      |
|----|-----------------|------------------------------------------------------|
| 1  |                 |                                                      |
| 2  | 306225012       | Twin pregnancy NOS                                   |
| 3  | 306226013       | Triplet pregnancy unspecified                        |
| 4  | 306229018       | Triplet pregnancy NOS                                |
| 5  | 306230011       | Quadruplet pregnancy unspecified                     |
| 6  | 306233013       | Quadruplet pregnancy NOS                             |
| 7  | 306239012       | Other multiple pregnancy                             |
| 8  | 306240014       | Other multiple pregnancy unspecified                 |
| 9  | 306243011       | Other multiple pregnancy NOS                         |
| 10 | 306244017       | Multiple pregnancy NOS                               |
| 11 | 306245016       | Multiple pregnancy NOS, unspecified                  |
| 12 | 355557010       | Concealed pregnancy                                  |
| 13 | 457034014       | Gestation <24 weeks                                  |
| 14 | 457035010       | Gestation = 24 weeks                                 |
| 15 | 457036011       | Gestation >24 weeks                                  |
| 16 | 460449010       | Normal pregnancy                                     |
| 17 | 460452019       | [V]Pregnancy confirmed                               |
| 18 | 460453012       | [V]Pregnant state, incidental                        |
| 19 | 460456016       | [V]Unspecified pregnant state                        |
| 20 | 460458015       | [V]Pregnancy with history of infertility             |
| 21 | 460460018       | [V]Pregnancy with history of abortion                |
| 22 | 460462014       | [V]Pregnancy with other poor obstetric history       |
| 23 | 460463016       | [V]Pregnancy with other poor reproductive history    |
| 24 | 460467015       | [V]Other specified high-risk pregnancy               |
| 25 | 460468013       | High risk pregnancy                                  |
| 26 | 460988019       | [V]Illegitimate pregnancy                            |
| 27 | 460991019       | [V]Other unwanted pregnancy                          |
| 28 | 476066010       | Illegitimate pregnancy                               |
| 29 | 503558016       | Patient currently pregnant                           |
| 30 | 505420016       | Unplanned pregnancy                                  |
| 31 | 1209117011      | Antenatal ultrasound confirms ectopic pregnancy      |
| 32 | 1234104012      | Pregnancy confirmed                                  |
| 33 | 1234377011      | Fallopian tube pregnancy                             |
| 34 | 1235620010      | Post-term pregnancy                                  |
| 35 | 2478758011      | Fetal gestational age                                |
| 36 | 2549789015      | Refer to early pregnancy unit                        |
| 37 | 2649301016      | Pregnancy care                                       |
| 38 | 299100000112    | Prescription exemption form - pregnancy              |
| 39 | 202661000006110 | Prolonged pregnancy                                  |
| 40 | 217311000006117 | Post-term pregnancy                                  |
| 41 | 218741000000113 | Pregnant                                             |
| 42 | 361321000000115 | Gestational age                                      |
| 43 | 366271000000116 | Mid trimester scan                                   |
| 44 | 366931000000111 | Ultrasound monitoring of early pregnancy             |
| 45 | 372041000000113 | Over 20 weeks gestational age                        |
| 46 | 372221000000111 | 14 - 20 weeks gestational age                        |
| 47 | 372241000000116 | 9 - 13 weeks gestational age                         |
| 48 | 372261000000115 | Under 9 weeks gestational age                        |
| 49 | 372281000000112 | Finding of gestational age                           |
| 50 | 372301000000113 | Gestational age NOS                                  |
| 51 | 485621000006112 | Antenatal ultrasound confirms intrauterine pregnancy |

|    |                   |                                           |
|----|-------------------|-------------------------------------------|
| 1  |                   |                                           |
| 2  | 491591000006118   | From 9 weeks to <14 weeks gestational age |
| 3  | 574561000006119   | Combined or heterotopic pregnancy         |
| 4  | 694831000006112   | Multiple pregnancy NOS                    |
| 5  | 795581000006116   | Gestation period, 40 weeks                |
| 6  | 887911000006112   | Post-term/prolonged pregnancy             |
| 7  | 888061000006113   | Quad pregnancy                            |
| 8  | 917251000006111   | 2nd pregnancy                             |
| 9  | 917261000006113   | 3rd pregnancy                             |
| 10 | 919151000006111   | Antenatal care: 2nd pregnancy             |
| 11 | 919161000006113   | Antenatal care: 3rd pregnancy             |
| 12 | 919381000006118   | Patient currently pregnant                |
| 13 | 919391000006115   | Pregnant - urine test confirms            |
| 14 | 919401000006118   | Pregnant blood test confirms              |
| 15 | 919411000006115   | Pregnant - V.E. confirms                  |
| 16 | 919421000006111   | Pregnant - on history                     |
| 17 | 919431000006114   | Pregnant - on abdom. palpation            |
| 18 | 919441000006116   | Pregnant - planned                        |
| 19 | 919451000006119   | Pregnant - unplanned - wanted             |
| 20 | 919461000006117   | Pregnant - unplanned - not wanted         |
| 21 | 919481000006110   | Pregnant unplanned ? wanted               |
| 22 | 919491000006113   | Pregnant - ? planned                      |
| 23 | 919501000006117   | Unplanned pregnancy                       |
| 24 | 920561000006115   | Pregnancy prolonged - 41 weeks            |
| 25 | 920571000006110   | Pregnancy prolonged - 42 weeks            |
| 26 | 956371000006118   | Pregnant number of weeks                  |
| 27 | 958831000006114   | Pregnancy                                 |
| 28 | 974541000006112   | Pregnancy NOS                             |
| 29 | 1009411000006111  | Pregnant - number of weeks                |
| 30 | 1577961000006118  | Pregnant - Number Of Weeks                |
| 31 | 1709831000006118  | E6 - Form Mat B1 Issued - Pregnant        |
| 32 | 1850951000006116  | Reason for influenza vaccine - pregnant   |
| 33 | 1904691000006114  | Concealed pregnancy                       |
| 34 | 1968881000006116  | [SHHAPT] Pregnant 1-12 weeks              |
| 35 | 1968891000006118  | [SHHAPT] Pregnant 13-28 weeks             |
| 36 | 1968901000006119  | [SHHAPT] Pregnant 29 weeks - full term    |
| 37 | 23734110000006113 | Gestation less than 28 weeks              |
| 38 | 2927491000006112  | Gestation period, 8 weeks                 |
| 39 | 3009061000006114  | Combined heterotopic pregnancy            |
| 40 | 3060451000006110  | EP - Ectopic pregnancy                    |
| 41 | 3170321000006114  | Third trimester pregnancy                 |
| 42 | 3436341000006118  | First trimester pregnancy                 |
| 43 | 3465771000006113  | Second trimester pregnancy                |
| 44 | 3568761000006117  | Intrauterine pregnancy                    |
| 45 | 3851861000006114  | Accidental pregnancy                      |
| 46 | 3922811000006114  | Term pregnancy                            |
| 47 | 4081801000006118  | Surrogate pregnancy                       |
| 48 | 4397131000006111  | First pregnancy                           |
| 49 | 4397161000006119  | Second pregnancy                          |
| 50 | 4397201000006113  | Fourth pregnancy                          |
| 51 | 4624301000006110  | Planned pregnancy                         |

|    |                   |                                                                         |
|----|-------------------|-------------------------------------------------------------------------|
| 1  |                   |                                                                         |
| 2  | 4624441000006116  | Antenatal care of second pregnancy                                      |
| 3  | 4624481000006110  | Antenatal care of third pregnancy                                       |
| 4  | 4624701000006111  | Antenatal care: precious pregnancy                                      |
| 5  | 4796891000006115  | Continuing pregnancy after intrauterine death of one or more fetuses    |
| 6  | 5104641000006118  | Undiagnosed pregnancy                                                   |
| 7  | 5104681000006112  | Pregnancy with uncertain dates                                          |
| 8  | 5104691000006110  | Low risk pregnancy                                                      |
| 9  | 5104711000006113  | Viable pregnancy                                                        |
| 10 | 5104731000006119  | Biochemical pregnancy                                                   |
| 11 | 5104741000006112  | Single pregnancy                                                        |
| 12 | 5104861000006118  | Viable fetus in abdominal pregnancy                                     |
| 13 | 5104871000006113  | Viable foetus in abdominal pregnancy                                    |
| 14 | 5104881000006111  | Unruptured tubal pregnancy                                              |
| 15 | 5264811000006117  | Presentation of pregnancy                                               |
| 16 | 5264821000006113  | Reported conception - pregnancy                                         |
| 17 | 5285441000006119  | Pregnancy test positive                                                 |
| 18 | 5285451000006117  | Pregnancy test weakly positive                                          |
| 19 | 5357971000006112  | First trimester                                                         |
| 20 | 5357991000006113  | Second trimester                                                        |
| 21 | 5358011000006117  | Third trimester                                                         |
| 22 | 5359841000006119  | Pregnant woman                                                          |
| 23 | 5584191000006113  | Wanted pregnancy                                                        |
| 24 | 5592021000006116  | Secondary abdominal pregnancy                                           |
| 25 | 5650021000006115  | Uncertain viability of pregnancy                                        |
| 26 | 5753521000006113  | Pregnancy                                                               |
| 27 | 6027021000006112  | Gestation less than 24 weeks                                            |
| 28 | 6027041000006117  | Gestation period, 24 weeks                                              |
| 29 | 6027071000006113  | Gestation greater than 24 weeks                                         |
| 30 | 6043741000006114  | Early stage of pregnancy                                                |
| 31 | 7090351000006111  | Gestation less than 20 weeks                                            |
| 32 | 7100341000006115  | Third trimester pregnancy less than 36 weeks                            |
| 33 | 7107641000006114  | Gestation greater than 20 weeks                                         |
| 34 | 7221311000006119  | Intends to continue pregnancy                                           |
| 35 | 7264921000006115  | Multiple pregnancy involving intrauterine pregnancy and tubal pregnancy |
| 36 | 7395361000006118  | Dichorionic diamniotic twin pregnancy                                   |
| 37 | 7395371000006113  | Monochorionic twin pregnancy                                            |
| 38 | 7395381000006111  | Monochorionic diamniotic twin pregnancy                                 |
| 39 | 7395411000006114  | Monochorionic monoamniotic twin pregnancy                               |
| 40 | 7706121000006118  | Dizygotic twin pregnancy                                                |
| 41 | 7991731000006116  | IVF - in-vitro fertilisation pregnancy                                  |
| 42 | 8031611000006111  | Epilepsy in pregnancy                                                   |
| 43 | 8042451000006119  | High risk pregnancy due to recurrent pregnancy loss                     |
| 44 | 8294311000006118  | Ultrasound scan of multiple pregnancy                                   |
| 45 | 8295351000006116  | Pregnancy of unknown location                                           |
| 46 | 11831091000006119 | Pregnancy with gestation less than 20 weeks                             |
| 47 | 13695331000006114 | Trichorionic triamniotic triplet pregnancy                              |
| 48 | 13695341000006116 | Dichorionic triamniotic triplet pregnancy                               |
| 49 | 13718411000006111 | Ectopic pregnancy of left ovary                                         |
| 50 | 13718431000006117 | Ectopic pregnancy of right ovary                                        |
| 51 | 14068761000006116 | Pregnancy unplanned but wanted                                          |

|    |                   |                                          |
|----|-------------------|------------------------------------------|
| 1  |                   |                                          |
| 2  | 14068771000006111 | Pregnancy unplanned and unwanted         |
| 3  | 4123016           | Failed forceps delivery                  |
| 4  | 28094011          | Missed abortion                          |
| 5  | 29367011          | Spontaneous abortion                     |
| 6  | 31041018          | Elective abortion                        |
| 7  | 31406012          | Low forceps delivery                     |
| 8  | 46918011          | Twin birth                               |
| 9  | 52214011          | Self-induced abortion                    |
| 10 | 66086012          | Legally induced abortion                 |
| 11 | 80331017          | Abortive plague                          |
| 12 | 82664019          | Illegally induced abortion               |
| 13 | 82665018          | Criminal abortion                        |
| 14 | 98603019          | Inevitable abortion                      |
| 15 | 112117014         | Spontaneous abortion with sepsis         |
| 16 | 248392011         | Registrar-birth/death/marriage           |
| 17 | 263355019         | P/N care started at birth                |
| 18 | 263405014         | Birth details                            |
| 19 | 263406010         | Place of birth                           |
| 20 | 263407018         | Home birth                               |
| 21 | 263408011         | GP unit birth                            |
| 22 | 263409015         | Consultant unit birth                    |
| 23 | 263411012         | Ambulance birth                          |
| 24 | 263414016         | Finding of place of birth                |
| 25 | 263435019         | Single live birth                        |
| 26 | 263436018         | Single stillbirth                        |
| 27 | 263444018         | Finding of outcome of delivery           |
| 28 | 263445017         | Birth of child                           |
| 29 | 263488013         | Baby birth weight under 3% (under 2500g) |
| 30 | 263504010         | Birth head circumference                 |
| 31 | 263505011         | Birth HC = < 3rd centile                 |
| 32 | 263506012         | Birth HC = 3rd-9th centile               |
| 33 | 263507015         | Birth HC = 10th-24th centile             |
| 34 | 263508013         | Birth HC = 25th-49th centile             |
| 35 | 263509017         | Birth HC = 50th-74th centile             |
| 36 | 263510010         | Birth HC = 75th-89th centile             |
| 37 | 263511014         | Birth HC = 90th-96th centile             |
| 38 | 263512019         | Birth HC = > 97th centile                |
| 39 | 263513012         | Birth head circumference NOS             |
| 40 | 263514018         | Birth length                             |
| 41 | 263515017         | Birth length = < 3rd centile             |
| 42 | 263516016         | Birth length=3rd-9th centile             |
| 43 | 263517013         | Birth length=10th-24th centile           |
| 44 | 263518015         | Birth length=25th-49th centile           |
| 45 | 263519011         | Birth length=50th-74th centile           |
| 46 | 263520017         | Birth length=75th-89th centile           |
| 47 | 263521018         | Birth length=90th-96th centile           |
| 48 | 263522013         | Birth length = > 97th centile            |
| 49 | 263602019         | Normal birth                             |
| 50 | 263787019         | Child not examined at birth              |
| 51 | 263796019         | Child exam. - birth NOS                  |

|    |           |                                                        |
|----|-----------|--------------------------------------------------------|
| 1  |           |                                                        |
| 2  | 273813015 | Introduction of abortifacient into uterine cavity      |
| 3  | 273818012 | Insertion of prostaglandin abortifacient pessary       |
| 4  | 273819016 | Insertion of abortifacient pessary                     |
| 5  | 273821014 | Introduction of abortifacient into uterine cavity NOS  |
| 6  | 274286016 | Other specified elective caesarean delivery            |
| 7  | 274289011 | Elective caesarean delivery NOS                        |
| 9  | 274293017 | Upper uterine segment caesarean delivery NEC           |
| 10 | 274297016 | Other specified other caesarean delivery               |
| 11 | 274298014 | Other caesarean delivery NOS                           |
| 12 | 274302018 | Breech extraction delivery with version                |
| 13 | 274304017 | Other specified breech extraction delivery             |
| 15 | 274305016 | Breech extraction delivery NOS                         |
| 16 | 274306015 | Other breech delivery                                  |
| 17 | 274307012 | Spontaneous breech delivery                            |
| 18 | 274308019 | Assisted breech delivery                               |
| 20 | 274309010 | Other specified other breech delivery                  |
| 21 | 274310017 | Other breech delivery NOS                              |
| 22 | 274311018 | Forceps cephalic delivery                              |
| 23 | 274312013 | High forceps cephalic delivery with rotation           |
| 24 | 274313015 | High forceps cephalic delivery NEC                     |
| 26 | 274318012 | Barton forceps cephalic delivery with rotation         |
| 27 | 274319016 | Dehee forceps cephalic delivery with rotation          |
| 28 | 274321014 | Piper forceps delivery                                 |
| 29 | 274322019 | Other specified forceps cephalic delivery              |
| 31 | 274323012 | Forceps cephalic delivery NOS                          |
| 32 | 274324018 | High vacuum delivery                                   |
| 33 | 274325017 | Low vacuum delivery                                    |
| 34 | 274326016 | Vacuum delivery before full dilation of cervix         |
| 35 | 274327013 | Trial of vacuum delivery                               |
| 36 | 274328015 | Other specified vacuum delivery                        |
| 38 | 274329011 | Vacuum delivery NOS                                    |
| 39 | 274336012 | Normal delivery                                        |
| 40 | 274338013 | Water birth delivery                                   |
| 41 | 274339017 | Other specified normal delivery                        |
| 42 | 274340015 | Normal delivery procedure                              |
| 44 | 274341016 | Delivery procedure                                     |
| 45 | 274344012 | Other specified other method of delivery               |
| 46 | 274345013 | Other method of delivery NOS                           |
| 47 | 274346014 | Operation to facilitate delivery                       |
| 48 | 274349019 | Other specified other operation to facilitate delivery |
| 50 | 274350019 | Other operation to facilitate delivery NOS             |
| 51 | 274351015 | Other specified induction or delivery operations       |
| 52 | 274352010 | Induction and delivery operations NOS                  |
| 53 | 274358014 | Manual removal of placenta from delivered uterus       |
| 54 | 274361010 | Other operations on delivered uterus                   |
| 56 | 274366017 | Instrumental exploration of delivered uterus NEC       |
| 57 | 274367014 | Manual exploration of delivered uterus NEC             |
| 58 | 274368016 | Normal delivery of placenta                            |
| 59 | 274377011 | Other specified other operation on delivered uterus    |
| 60 | 274378018 | Other operation on delivered uterus NOS                |



|    |           |                                                              |
|----|-----------|--------------------------------------------------------------|
| 1  |           |                                                              |
| 2  | 283814015 | Discharged from hospital within 6 hours of delivery          |
| 3  | 305290019 | Delivery of viable fetus in abdominal pregnancy              |
| 4  | 305295012 | Tubal abortion                                               |
| 5  | 305305016 | Spontaneous abortion unspecified                             |
| 6  | 305317019 | Unspecified spontaneous abortion with shock                  |
| 7  | 305323012 | Unspecified spontaneous abortion NOS                         |
| 8  | 305328015 | Incomplete spontaneous abortion with renal failure           |
| 9  | 305329011 | Incomplete spontaneous abortion with metabolic disorder      |
| 10 | 305330018 | Incomplete spontaneous abortion with shock                   |
| 11 | 305331019 | Incomplete spontaneous abortion with embolism                |
| 12 | 305333016 | Incomplete spontaneous abortion with complication NOS        |
| 13 | 305334018 | Complete spontaneous abortion with renal failure             |
| 14 | 305344012 | Complete spontaneous abortion with metabolic disorder        |
| 15 | 305345013 | Complete spontaneous abortion with shock                     |
| 16 | 305347017 | Complete spontaneous abortion with embolism                  |
| 17 | 305349019 | Complete spontaneous abortion with complication NOS          |
| 18 | 305351015 | Complete spontaneous abortion NOS                            |
| 19 | 305376019 | Spontaneous abortion NOS                                     |
| 20 | 305382016 | Legal abortion unspecified                                   |
| 21 | 305393019 | Unspecified legal abortion with complication NOS             |
| 22 | 305395014 | Unspecified legal abortion NOS                               |
| 23 | 305407013 | Incomplete legal abortion with renal failure                 |
| 24 | 305408015 | Incomplete legal abortion with metabolic disorder            |
| 25 | 305409011 | Incomplete legal abortion with shock                         |
| 26 | 305410018 | Incomplete legal abortion with embolism                      |
| 27 | 305411019 | Incomplete legal abortion with other specified complication  |
| 28 | 305414010 | Incomplete legal abortion with complication NOS              |
| 29 | 305416012 | Incomplete legal abortion NOS                                |
| 30 | 305428016 | Complete legal abortion with renal failure                   |
| 31 | 305429012 | Complete legal abortion with metabolic disorder              |
| 32 | 305430019 | Complete legal abortion with shock                           |
| 33 | 305431015 | Complete legal abortion with embolism                        |
| 34 | 305432010 | Complete legal abortion with other specified complication    |
| 35 | 305433017 | Complete legal abortion with complication NOS                |
| 36 | 305435012 | Complete legal abortion NOS                                  |
| 37 | 305442012 | Illegal abortion unspecified                                 |
| 38 | 305447018 | Unspecified illegal abortion with renal failure              |
| 39 | 305448011 | Unspecified illegal abortion with metabolic disorder         |
| 40 | 305449015 | Unspecified illegal abortion with shock                      |
| 41 | 305450015 | Unspecified illegal abortion with embolism                   |
| 42 | 305452011 | Unspecified illegal abortion with complication NOS           |
| 43 | 305453018 | Unspecified illegal abortion with no mention of complication |
| 44 | 305454012 | Unspecified illegal abortion NOS                             |
| 45 | 305455013 | Illegal abortion incomplete                                  |
| 46 | 305460012 | Incomplete illegal abortion with renal failure               |
| 47 | 305461011 | Incomplete illegal abortion with metabolic disorder          |
| 48 | 305462016 | Incomplete illegal abortion with shock                       |
| 49 | 305463014 | Incomplete illegal abortion with embolism                    |
| 50 | 305465019 | Incomplete illegal abortion with complication NOS            |
| 51 | 305467010 | Incomplete illegal abortion NOS                              |

|    |           |                                                               |
|----|-----------|---------------------------------------------------------------|
| 1  |           |                                                               |
| 2  | 305468017 | Illegal abortion complete                                     |
| 3  | 305473011 | Complete illegal abortion with renal failure                  |
| 4  | 305474017 | Complete illegal abortion with metabolic disorder             |
| 5  | 305475016 | Complete illegal abortion with shock                          |
| 6  | 305476015 | Complete illegal abortion with embolism                       |
| 8  | 305477012 | Complete illegal abortion with other specified complication   |
| 9  | 305481012 | Complete illegal abortion with complication NOS               |
| 10 | 305483010 | Complete illegal abortion NOS                                 |
| 11 | 305484016 | Illegally induced abortion NOS                                |
| 12 | 305485015 | Unspecified abortion                                          |
| 14 | 305487011 | Unspecified abortion with genital tract or pelvic infection   |
| 15 | 305488018 | Unspecified abortion with delayed or excessive haemorrhage    |
| 16 | 305491018 | Unspecified abortion with renal failure                       |
| 17 | 305496011 | Unspecified abortion with complication NOS                    |
| 18 | 305497019 | Unspecified abortion with no mention of complication          |
| 20 | 305498012 | Unspecified abortion NOS                                      |
| 21 | 305499016 | Unspecified abortion incomplete                               |
| 22 | 305511017 | Unspecified incomplete abortion NOS                           |
| 23 | 305512012 | Unspecified abortion complete                                 |
| 24 | 305522018 | Unspecified complete abortion with complication NOS           |
| 26 | 305524017 | Unspecified complete abortion NOS                             |
| 27 | 305613010 | Other specified pregnancy with abortive outcome               |
| 28 | 305614016 | Pregnancy with abortive outcome NOS                           |
| 29 | 306209019 | Continuing pregnancy after abortion of one fetus or more      |
| 31 | 306220019 | Normal delivery but antenatal or postnatal conditions present |
| 32 | 306221015 | Normal delivery in completely normal case NOS                 |
| 33 | 306223017 | Twin pregnancy - delivered                                    |
| 34 | 306227016 | Triplet pregnancy - delivered                                 |
| 35 | 306231010 | Quadruplet pregnancy - delivered                              |
| 36 | 306235018 | Multiple delivery, all spontaneous                            |
| 38 | 306236017 | Multiple delivery, all by forceps and vacuum extractor        |
| 39 | 306237014 | Multiple delivery, all by caesarean section                   |
| 40 | 306241013 | Other multiple pregnancy - delivered                          |
| 41 | 306246015 | Multiple pregnancy NOS - delivered                            |
| 43 | 306711012 | Intrauterine death - delivered                                |
| 44 | 307569010 | Forceps delivery unspecified                                  |
| 45 | 307570011 | Forceps delivery - delivered                                  |
| 46 | 307577014 | Delivery by combination of forceps and vacuum extractor       |
| 47 | 307579012 | Forceps delivery NOS                                          |
| 48 | 307583012 | Vacuum extractor delivery unspecified                         |
| 50 | 307584018 | Vacuum extractor delivery - delivered                         |
| 51 | 307585017 | Vacuum extractor delivery NOS                                 |
| 52 | 307590019 | Breech extraction - delivered                                 |
| 53 | 307595012 | Caesarean delivery unspecified                                |
| 55 | 307596013 | Caesarean delivery - delivered                                |
| 56 | 307600015 | Delivery by elective caesarean section                        |
| 57 | 307603018 | Delivery by emergency caesarean section                       |
| 58 | 307604012 | Delivery by caesarean hysterectomy                            |
| 59 | 307608010 | Caesarean delivery NOS                                        |
| 60 | 308082011 | [X]Other abortion                                             |

|    |           |                                                                       |
|----|-----------|-----------------------------------------------------------------------|
| 1  |           |                                                                       |
| 2  | 308177019 | [X]Other single spontaneous delivery                                  |
| 3  | 308178012 | [X]Other and unspecified forceps delivery                             |
| 4  | 308179016 | [X]Other single delivery by caesarean section                         |
| 5  | 308181019 | [X]Other assisted breech delivery                                     |
| 6  | 308182014 | [X]Other manipulation-assisted delivery                               |
| 7  | 308183016 | [X]Other specified assisted single delivery                           |
| 8  | 308185011 | [X]Other multiple delivery                                            |
| 9  | 308186012 | [X]Assisted single delivery, unspecified                              |
| 10 | 308187015 | Multiple birth delivery                                               |
| 11 | 355670013 | Breech delivery                                                       |
| 12 | 355677011 | Vaginal delivery following previous caesarean section                 |
| 13 | 359964011 | Stillbirth NEC                                                        |
| 14 | 398326018 | Incomplete spontaneous abortion NOS                                   |
| 15 | 398334012 | Readmission for retained products of conception, spontaneous abortion |
| 16 | 401475014 | Outcome of delivery                                                   |
| 17 | 401481018 | Finding of birth details                                              |
| 18 | 411106013 | Simpson's forceps delivery                                            |
| 19 | 411401013 | Spontaneous abortion with heavy bleeding                              |
| 20 | 411405016 | Retained products after spontaneous abortion                          |
| 21 | 418952011 | Livebirth                                                             |
| 22 | 418953018 | Stillbirth [prevention record]                                        |
| 23 | 418954012 | Triplet birth                                                         |
| 24 | 418956014 | Delivery - sex of baby                                                |
| 25 | 420192012 | Premature delivery                                                    |
| 26 | 444045013 | Forceps delivery                                                      |
| 27 | 451085010 | Inevitable abortion complete                                          |
| 28 | 451094016 | Inevitable abortion incomplete                                        |
| 29 | 451097011 | Complete inevitable abortion without complication                     |
| 30 | 451099014 | Unspecified inevitable abortion complicated by embolism               |
| 31 | 451103016 | Inevitable abortion unspecified                                       |
| 32 | 451105011 | Incomplete inevitable abortion with unspecified complication          |
| 33 | 451106012 | Incomplete inevitable abortion complicated by embolism                |
| 34 | 451109017 | Incomplete inevitable abortion without complication                   |
| 35 | 451113012 | Complete inevitable abortion complicated by embolism                  |
| 36 | 451115017 | Unspecified inevitable abortion without complication                  |
| 37 | 451120017 | Complete inevitable abortion with unspecified complication            |
| 38 | 452906013 | Spontaneous vertex delivery                                           |
| 39 | 453239011 | Fresh stillbirth                                                      |
| 40 | 453240013 | Macerated stillbirth                                                  |
| 41 | 460135012 | Domino delivery                                                       |
| 42 | 460528011 | [V]Outcome of delivery                                                |
| 43 | 460529015 | [V]Single live birth                                                  |
| 44 | 460530013 | [V]Single stillbirth                                                  |
| 45 | 460534016 | Multiple birth                                                        |
| 46 | 460535015 | [V]Other multiple birth, some live born                               |
| 47 | 460536019 | [V]Other multiple birth, all stillborn                                |
| 48 | 460537011 | [V]Other specified outcome of delivery                                |
| 49 | 460538018 | [V]Unspecified delivery outcome                                       |
| 50 | 460559013 | [V]Healthy liveborn infants according to type of birth                |
| 51 | 460560015 | Singleton liveborn unspecified as to place of birth                   |

|    |                 |                                                                     |
|----|-----------------|---------------------------------------------------------------------|
| 1  |                 |                                                                     |
| 2  | 460584011       | [V]Other multiple birth, mates live born                            |
| 3  | 460585012       | [V]Other multiple birth, born in hospital, mates live born          |
| 4  | 460589018       | [V]Other multiple birth, mates live born, NOS                       |
| 5  | 460590010       | [V]Other multiple birth, mates stillborn                            |
| 6  |                 |                                                                     |
| 7  | 460591014       | [V]Other multiple birth, born in hospital, mates stillborn          |
| 8  | 460595017       | [V]Other multiple birth, mates stillborn, NOS                       |
| 9  | 460596016       | [V]Other multiple birth, mates live and stillborn                   |
| 10 | 460606015       | [V]Other multiple birth, mates live and stillborn NOS               |
| 11 | 460607012       | [V]Other multiple birth, unspecified                                |
| 12 |                 |                                                                     |
| 13 | 460608019       | [V]Other multiple birth, unspecified, born in hospital              |
| 14 | 460612013       | [V]Other multiple birth, unspecified, NOS                           |
| 15 | 460613015       | [V]Unspecified birth                                                |
| 16 | 460615010       | [V]Unspecified birth, born before admission to hospital             |
| 17 | 461396011       | [X]Other multiple births, all liveborn                              |
| 18 |                 |                                                                     |
| 19 | 461397019       | [X]Other multiple births, some liveborn                             |
| 20 | 461398012       | [X]Other multiple births, all stillborn                             |
| 21 | 461401010       | [X]Oth multip liveborn infants, unspec as to place of birth         |
| 22 | 492067012       | Legally induced abortion - TOP                                      |
| 23 | 497301012       | Manually assisted vaginal delivery                                  |
| 24 |                 |                                                                     |
| 25 | 499316017       | Mid-cavity forceps delivery                                         |
| 26 | 501543018       | Pregnancy with abortive outcome                                     |
| 27 | 1227644019      | [V]Stillbirth                                                       |
| 28 | 1227645018      | [V]Live birth                                                       |
| 29 | 1227646017      | [V]Birth - type                                                     |
| 30 |                 |                                                                     |
| 31 | 1489338013      | Born by forceps delivery                                            |
| 32 | 1489339017      | Born by normal vaginal delivery                                     |
| 33 | 1491663016      | Therapeutic abortion                                                |
| 34 | 1493826016      | Curettage of delivered uterus                                       |
| 35 | 2154381019      | Elective caesarean delivery                                         |
| 36 | 2159214016      | Born by breech delivery                                             |
| 37 |                 |                                                                     |
| 38 | 2159215015      | Born by ventouse delivery                                           |
| 39 | 2477192015      | Indeterminate stillbirth                                            |
| 40 | 2579233015      | Scanzoni forceps cephalic delivery with rotation                    |
| 41 | 2794110017      | Stillbirth - unknown if foetal death intrapartum or prior to labour |
| 42 |                 |                                                                     |
| 43 | 3503056015      | Delivery by mid-vacuum extraction                                   |
| 44 | 66941000006112  | Delivery by vacuum extraction                                       |
| 45 | 71831000006112  | Vacuum delivery                                                     |
| 46 | 81651000006111  | Unspecified abortion                                                |
| 47 |                 |                                                                     |
| 48 | 81691000006117  | Unspecified abortion NOS                                            |
| 49 | 87191000006118  | Trial forceps delivery                                              |
| 50 | 117121000006114 | Surgical abortion - complete                                        |
| 51 | 117131000006112 | Surgical abortion - incomplete                                      |
| 52 | 130121000006117 | Spontaneous breech delivery                                         |
| 53 |                 |                                                                     |
| 54 | 130131000006119 | Spontaneous breech delivery                                         |
| 55 | 130231000006113 | Spontaneous vaginal delivery                                        |
| 56 | 220881000000115 | Deliveries by vacuum extractor                                      |
| 57 | 220891000000118 | Ventouse delivery                                                   |
| 58 | 224131000000116 | Childbirth operations                                               |
| 59 | 296261000006113 | Nursing home birth                                                  |
| 60 | 297841000006111 | Delivery normal                                                     |

|    |                  |                                                                  |
|----|------------------|------------------------------------------------------------------|
| 1  |                  |                                                                  |
| 2  | 349951000006113  | [V]Unspecified birth NOS                                         |
| 3  | 349961000006110  | [V]Unspecified birth, born outside hospital and not hospitalised |
| 4  | 359181000006117  | Stillbirth                                                       |
| 5  | 423241000006112  | [X]Pregnancy with abortive outcome                               |
| 6  | 495951000006112  | Assisted breech delivery                                         |
| 7  | 532021000006113  | Caesarean delivery                                               |
| 8  | 637851000006117  | Elective upper uterine segment caesarean delivery                |
| 9  | 675211000006111  | Neville-Barnes forceps delivery                                  |
| 10 | 695721000006115  | Multiple delivery                                                |
| 11 | 703361000006115  | Mid forceps cephalic delivery NEC                                |
| 12 | 703371000006110  | Mid forceps cephalic delivery with rotation                      |
| 13 | 712611000006115  | Medical abortion - complete                                      |
| 14 | 712771000006119  | Medical cert. of still-birth                                     |
| 15 | 713211000006112  | Medical abortion - incomplete                                    |
| 16 | 717731000006115  | Manual removal products of conception delivered uterus NOS       |
| 17 | 717741000006113  | Manual removal products of conception delivered uterus OS        |
| 18 | 717751000006110  | Manual removal of products of conception from delivered uterus   |
| 19 | 733921000006119  | Low forceps cephalic delivery                                    |
| 20 | 748251000006111  | Complete legal abortion                                          |
| 21 | 748271000006118  | Legal abortion incomplete                                        |
| 22 | 754081000006118  | Kielland forceps cephalic delivery with rotation                 |
| 23 | 755061000006112  | Kielland forceps delivery with rotation                          |
| 24 | 853181000006117  | Live birth                                                       |
| 25 | 871251000006115  | Other forceps delivery op.                                       |
| 26 | 871401000006118  | Breech delivery op.                                              |
| 27 | 871441000006116  | High forceps delivery op.                                        |
| 28 | 871461000006117  | Mid forceps delivery op.                                         |
| 29 | 871471000006112  | Low forceps delivery op.                                         |
| 30 | 871571000006111  | Supervision - normal delivery                                    |
| 31 | 887671000006110  | Induced abortion                                                 |
| 32 | 887681000006113  | Abortion NOS                                                     |
| 33 | 887771000006117  | Abortive pregnancy NOS                                           |
| 34 | 887781000006119  | Other abortive pregnancy                                         |
| 35 | 888051000006111  | Normal delivery - occipitoant.                                   |
| 36 | 888601000006115  | High forceps delivery                                            |
| 37 | 888651000006116  | Method of delivery NOS                                           |
| 38 | 893901000006118  | Born by breech delivery                                          |
| 39 | 893911000006115  | Born by forceps delivery                                         |
| 40 | 893931000006114  | Born by caesarean delivery                                       |
| 41 | 906891000006115  | [RFC] Labour and delivery                                        |
| 42 | 988331000006111  | Other forceps delivery op.                                       |
| 43 | 991561000006119  | Abortive pregnancy NOS                                           |
| 44 | 991781000006117  | Breech delivery                                                  |
| 45 | 1884381000006112 | Time of delivery                                                 |
| 46 | 1898141000006112 | Antepartum stillbirth                                            |
| 47 | 1898151000006114 | Intrapartum stillbirth                                           |
| 48 | 2365201000000116 | Antepartum stillbirth                                            |
| 49 | 2365241000000118 | Intrapartum stillbirth                                           |
| 50 | 2527321000006111 | Forceps delivery failed                                          |
| 51 | 2527331000006114 | Failed forceps delivery                                          |



|    |                  |                                                          |
|----|------------------|----------------------------------------------------------|
| 1  |                  |                                                          |
| 2  | 2562021000006116 | Birth                                                    |
| 3  | 2588081000006117 | Assisted spontaneous delivery                            |
| 4  | 2649031000006112 | Term birth of newborn female                             |
| 5  | 2783301000006116 | Low forceps delivery with episiotomy                     |
| 6  | 2793541000006110 | Surgical treatment of missed abortion of first trimester |
| 7  | 2835891000006111 | Term birth of newborn male                               |
| 8  | 2879641000006116 | Spontaneous abortion without complication                |
| 9  | 2913301000006114 | Mid forceps delivery with episiotomy                     |
| 10 | 2921211000006110 | Delivery by vacuum extraction with episiotomy            |
| 11 | 3134071000006118 | Legal abortion                                           |
| 12 | 3289421000006118 | FTND - Full term normal delivery                         |
| 13 | 3289431000006115 | SVD - Spontaneous vaginal delivery                       |
| 14 | 3289441000006113 | Normal delivery                                          |
| 15 | 3303281000006110 | Illegal abortion                                         |
| 16 | 3322041000006114 | Term birth of newborn twins                              |
| 17 | 3439141000006111 | Induced abortion                                         |
| 18 | 3464721000006113 | Premature birth of newborn female                        |
| 19 | 3516291000006115 | Mid forceps delivery                                     |
| 20 | 3657551000006113 | Forceps delivery with rotation of fetal head             |
| 21 | 3766101000006117 | Stillbirth of premature male (1000-2499 gms.)            |
| 22 | 3952341000006118 | Delivery by Kielland rotation                            |
| 23 | 3952361000006119 | KRFD - Kielland's rotational forceps delivery            |
| 24 | 3952371000006114 | Kielland's rotational forceps delivery                   |
| 25 | 3960501000006117 | High forceps delivery                                    |
| 26 | 4081901000006112 | Post-term delivery                                       |
| 27 | 4515081000006117 | Incomplete spontaneous abortion                          |
| 28 | 4676701000006117 | Elective cesarean delivery                               |
| 29 | 4676811000006111 | Midforceps cephalic delivery with rotation               |
| 30 | 4676971000006113 | ND - Normal delivery                                     |
| 31 | 4801431000006110 | Delivered by mid-cavity forceps with rotation            |
| 32 | 4801461000006118 | Deliveries by caesarean                                  |
| 33 | 4801481000006111 | Cesarean delivery                                        |
| 34 | 4801551000006119 | Delivery by elective cesarean section                    |
| 35 | 4801571000006112 | Delivery by emergency cesarean section                   |
| 36 | 5101421000006113 | Instrumental delivery                                    |
| 37 | 5101431000006111 | Nonrotational forceps delivery                           |
| 38 | 5101441000006118 | Outlet forceps delivery                                  |
| 39 | 5101831000006113 | Placental delivery procedure                             |
| 40 | 5105591000006112 | Complete breech delivery                                 |
| 41 | 5105621000006114 | Multiple delivery                                        |
| 42 | 5105651000006117 | VBAC - Vaginal birth after caesarean section             |
| 43 | 5106241000006114 | SB - Stillbirth                                          |
| 44 | 5523911000006110 | Delivered by low forceps delivery                        |
| 45 | 5523921000006119 | Delivered by mid-cavity forceps delivery                 |
| 46 | 5523931000006116 | Deliveries by breech extraction                          |
| 47 | 5701001000006116 | Medical abortion                                         |
| 48 | 5728741000006115 | Breech/instrumental delivery operations                  |
| 49 | 5730571000006118 | Normal delivery - occipitoanterior                       |
| 50 | 5731041000006113 | Born after precipitate delivery                          |
| 51 | 5744011000006110 | Mother delivered                                         |

1  
2 5744051000006111 Vaginal delivery  
3 5904701000006113 Delivered by caesarean section - pregnancy at term  
4 5904711000006111 Delivered by cesarean section - pregnancy at term  
5 5904721000006115 Delivered by caesarean delivery following previous caesarean delivery  
6 5904741000006110 Delivered by caesarean deliv following previous caesarean delivery  
7  
8 5906231000006119 FD - Forceps delivery  
9 6427811000006115 Delivery of cephalic presentation  
10 6451791000006110 Childbirth  
11 6451801000006111 Pregnancy delivered  
12 6451811000006114 Delivery  
13 6458691000006114 Abortion  
14  
15 6557371000006112 Born by normal vagin delivery  
16 6767831000006112 Unplanned home birth  
17 7128031000006119 Failed instrumental delivery  
18 7511801000006114 Preterm spontaneous labor with preterm delivery  
19 7511821000006116 Preterm spontaneous labor with term delivery  
20 7693521000006111 Delivery by caesarean section for footling breech presentation  
21 7693541000006116 Delivery by caesarean section for breech presentation  
22 8004341000006112 Single liveborn born in hospital by vaginal delivery  
23 9326461000006110 Vacuum assisted vaginal delivery  
24 9326571000006110 Preterm labour with preterm delivery  
25 9326581000006110 Preterm labor with preterm delivery  
26 12703861000006100 Manually assisted spontaneous delivery  
27 12716231000006100 Abortion  
28  
29  
30  
31  
32  
33  
34  
35  
36  
37  
38  
39  
40  
41  
42  
43  
44  
45  
46  
47  
48  
49  
50  
51  
52  
53  
54  
55  
56  
57  
58  
59  
60

|    |             |
|----|-------------|
| 1  |             |
| 2  | ICD-10 code |
| 3  | O00         |
| 4  | O00.0       |
| 5  | O00.1       |
| 6  | O00.2       |
| 7  | O00.8       |
| 8  | O00.9       |
| 9  | O01         |
| 10 | O02         |
| 11 | O03         |
| 12 | O04         |
| 13 | O05         |
| 14 | O06         |
| 15 | O08         |
| 16 | O03.0       |
| 17 | O03.1       |
| 18 | O03.2       |
| 19 | O03.3       |
| 20 | O03.4       |
| 21 | O03.5       |
| 22 | O03.6       |
| 23 | O03.7       |
| 24 | O03.8       |
| 25 | O03.9       |
| 26 | O04.0       |
| 27 | O04.1       |
| 28 | O04.2       |
| 29 | O04.3       |
| 30 | O04.4       |
| 31 | O04.5       |
| 32 | O04.6       |
| 33 | O04.7       |
| 34 | O04.8       |
| 35 | O04.9       |
| 36 | O05.0       |
| 37 | O05.1       |
| 38 | O05.2       |
| 39 | O05.3       |
| 40 | O05.4       |
| 41 | O05.5       |
| 42 | O05.6       |
| 43 | O05.7       |
| 44 | O05.8       |
| 45 | O05.9       |
| 46 | O06.0       |
| 47 | O06.1       |
| 48 | O06.2       |
| 49 | O06.3       |
| 50 | O06.4       |
| 51 | O06.5       |

For peer review only



1  
2 O06.6  
3 O06.7  
4 O06.8  
5 O06.9  
6 O80.0  
7 O80.1  
8 O80.8  
9 O80.9  
10 O80.9  
11 O82.0  
12 O82.1  
13 O82.2  
14 O82.2  
15 O82.8  
16 O82.9  
17 O81.0  
18 O81.1  
19 O81.2  
20 O81.2  
21 O81.3  
22 O81.4  
23 O81.5  
24 O83.0  
25 O83.1  
26 O83.1  
27 O83.2  
28 O83.3  
29 O83.3  
30 O83.4  
31 O83.8  
32 O83.9  
33 O84.0  
34 O84.1  
35 O84.2  
36 O84.2  
37 O84.8  
38 O84.9  
39  
40  
41  
42  
43  
44  
45  
46  
47  
48  
49  
50  
51  
52  
53  
54  
55  
56  
57  
58  
59  
60

For peer review only

|    |                                                                                                   |
|----|---------------------------------------------------------------------------------------------------|
| 1  |                                                                                                   |
| 2  | Term                                                                                              |
| 3  | Ectopic pregnancy                                                                                 |
| 4  | Abdominal pregnancy                                                                               |
| 5  | Tubal pregnancy                                                                                   |
| 6  | Ovarian pregnancy                                                                                 |
| 7  | Other ectopic pregnancy                                                                           |
| 8  | Ectopic pregnancy, unspecified                                                                    |
| 9  | Hydatidiform mole                                                                                 |
| 10 | Other abnormal products of conception                                                             |
| 11 | Spontaneous abortion                                                                              |
| 12 | Medical abortion                                                                                  |
| 13 | Other abortion                                                                                    |
| 14 | Unspecified abortion                                                                              |
| 15 | Complications following abortion and ectopic and molar pregnancy                                  |
| 16 | Spontaneous abortion : incomplete, complicated by genital tract and pelvic infection              |
| 17 | Spontaneous abortion : incomplete, complicated by delayed or excessive haemorrhage                |
| 18 | Spontaneous abortion : incomplete, complicated by embolism                                        |
| 19 | Spontaneous abortion : incomplete, with other and unspecified complications                       |
| 20 | Spontaneous abortion : incomplete, without complication                                           |
| 21 | Spontaneous abortion : complete or unspecified, complicated by genital tract and pelvic infection |
| 22 | Spontaneous abortion : complete or unspecified, complicated by delayed or excessive haemorrhage   |
| 23 | Spontaneous abortion : complete or unspecified, complicated by embolism                           |
| 24 | Spontaneous abortion : complete or unspecified, with other and unspecified complications          |
| 25 | Spontaneous abortion : complete or unspecified, without complication                              |
| 26 | Medical abortion : incomplete, complicated by genital tract and pelvic infection                  |
| 27 | Medical abortion : incomplete, complicated by delayed or excessive haemorrhage                    |
| 28 | Medical abortion : incomplete, complicated by embolism                                            |
| 29 | Medical abortion : incomplete, with other and unspecified complications                           |
| 30 | Medical abortion : incomplete, without complication                                               |
| 31 | Medical abortion : complete or unspecified, complicated by genital tract and pelvic infection     |
| 32 | Medical abortion : complete or unspecified, complicated by delayed or excessive haemorrhage       |
| 33 | Medical abortion : complete or unspecified, complicated by embolism                               |
| 34 | Medical abortion : complete or unspecified, with other and unspecified complications              |
| 35 | Medical abortion : complete or unspecified, without complication                                  |
| 36 | Other abortion : incomplete, complicated by genital tract and pelvic infection                    |
| 37 | Other abortion : incomplete, complicated by delayed or excessive haemorrhage                      |
| 38 | Other abortion : incomplete, complicated by embolism                                              |
| 39 | Other abortion : incomplete, with other and unspecified complications                             |
| 40 | Other abortion : incomplete, without complication                                                 |
| 41 | Other abortion : complete or unspecified, complicated by genital tract and pelvic infection       |
| 42 | Other abortion : complete or unspecified, complicated by delayed or excessive haemorrhage         |
| 43 | Other abortion : complete or unspecified, complicated by embolism                                 |
| 44 | Other abortion : complete or unspecified, with other and unspecified complications                |
| 45 | Other abortion : complete or unspecified, without complication                                    |
| 46 | Unspecified abortion : incomplete, complicated by genital tract and pelvic infection              |
| 47 | Unspecified abortion : incomplete, complicated by delayed or excessive haemorrhage                |
| 48 | Unspecified abortion : incomplete, complicated by embolism                                        |
| 49 | Unspecified abortion : incomplete, with other and unspecified complications                       |
| 50 | Unspecified abortion : incomplete, without complication                                           |
| 51 | Unspecified abortion : complete or unspecified, complicated by genital tract and pelvic infection |
| 52 | Unspecified abortion : complete or unspecified, complicated by delayed or excessive haemorrhage   |
| 53 | Unspecified abortion : complete or unspecified, complicated by embolism                           |
| 54 | Unspecified abortion : complete or unspecified, with other and unspecified complications          |
| 55 | Unspecified abortion : complete or unspecified, without complication                              |
| 56 | Unspecified abortion : complete or unspecified, complicated by genital tract and pelvic infection |
| 57 | Unspecified abortion : complete or unspecified, complicated by delayed or excessive haemorrhage   |
| 58 | Unspecified abortion : complete or unspecified, complicated by embolism                           |
| 59 | Unspecified abortion : complete or unspecified, with other and unspecified complications          |
| 60 | Unspecified abortion : complete or unspecified, without complication                              |

1 Unspecified abortion : complete or unspecified, complicated by delayed or excessive haemorrhage  
2 Unspecified abortion : complete or unspecified, complicated by embolism  
3 Unspecified abortion : complete or unspecified, with other and unspecified complications  
4 Unspecified abortion : complete or unspecified, without complication  
5 Spontaneous vertex delivery  
6 Spontaneous breech delivery  
7 Other single spontaneous delivery  
8 Single spontaneous delivery, unspecified  
9 Delivery by elective caesarean section  
10 Delivery by emergency caesarean section  
11 Delivery by caesarean hysterectomy  
12 Other single delivery by caesarean section  
13 Delivery by caesarean section, unspecified  
14 Low forceps delivery  
15 Mid-cavity forceps delivery  
16 Mid-cavity forceps with rotation  
17 Other and unspecified forceps delivery  
18 Vacuum extractor delivery  
19 Delivery by combination of forceps and vacuum extractor  
20 Breech extraction  
21 Other assisted breech delivery  
22 Other manipulation-assisted delivery  
23 Delivery of viable fetus in abdominal pregnancy  
24 Destructive operation for delivery  
25 Other specified assisted single delivery  
26 Assisted single delivery, unspecified  
27 Multiple delivery, all spontaneous  
28 Multiple delivery, all by forceps and vacuum extractor  
29 Multiple delivery, all by caesarean section  
30 Other multiple delivery  
31 Multiple delivery  
32  
33  
34  
35  
36  
37  
38  
39  
40  
41  
42  
43  
44  
45  
46  
47  
48  
49  
50  
51  
52  
53  
54  
55  
56  
57  
58  
59  
60

1 Andersen et al (2023)

2 Inclusion criteria as in PANORAMIC protocol

3 Chronic respiratory disease (including chronic obstructive pulmonary disease (COPD), cystic fibrosis and  
4 asthma requiring at least daily use of preventative and/or reliever medication)

5 Chronic heart or vascular diseases

6 Renal disease: mild kidney disease (CKD) stage 2 and 3, with an eGFR measurement in the past 6 months

7 Chronic liver disease

8 Chronic neurological disease (including dementia, stroke, epilepsy)

9 Severe and profound learning disability

10 Down's syndrome

11 Diabetes mellitus (Type I or Type II)

12 present at birth and diagnosed in childhood) or secondary due to disease or treatment (e.g., sickle cell, HIV,  
13 cancer, chemotherapy)

14 Solid organ, bone marrow and stem cell transplant recipients

15 Morbid obesity (BMI > 35)

16 Severe mental illness

17 Community and care home resident

18 Description of sheet abbreviations:

19 pan\_ to reflect PANORAMIC trial criteria code list

20 \_XX\_ to reflect the concept

21 \_\_m to reflect medcodeid, \_icd to reflect ICD-10 codes, \_p to reflect procodeid or \_opcs to reflect OPCS procodeid

22 Format of sheets:

23 medcodeid and procodeid are stored as text, not integers, as per CPRD suggestions.

Medcodeid list ICD-10 code list Prodcodeid list OPCS code list

|           |             |           |              |
|-----------|-------------|-----------|--------------|
| pan_res_m | X           | pan_res_p | X            |
| pan_hv_m  | pan_hv_icd  | X         | X            |
| pan_ren_m | pan_ren_icd | X         | X            |
| pan_liv_m | pan_liv_icd | X         | X            |
| pan_neu_m | pan_neu_icd | X         | X            |
| pan_lea_m | pan_lea_icd | X         | X            |
| pan_dow_m | pan_dow_icd | X         | X            |
| pan_dm_m  | pan_dm_icd  | X         | X            |
| X         | X           | pan_imm_p | X            |
| pan_tra_m | pan_tra_icd | X         | pan_tra_opcs |
| pan_obe_m | pan_obe_icd | X         | X            |
| pan_men_m | pan_men_icd | pan_men_p | X            |
| pan_car_m | X           | X         | X            |

: list

| 1  | Medcodeid         | Term                                                         |
|----|-------------------|--------------------------------------------------------------|
| 2  | 105519017         | chronic bronchitis                                           |
| 3  | 111723011         | bagassosis                                                   |
| 4  | 113497011         | centrilobular emphysema                                      |
| 5  | 1148241000000114  | cystic fibrosis annual review                                |
| 6  | 1174311000000111  | arthropathy in cystic fibrosis                               |
| 7  | 1174361000000113  | cystic fibrosis with distal intestinal obstruction syndrome  |
| 8  | 1174401000000116  | fibrosing colonopathy                                        |
| 9  | 11777991000006114 | bronchiolitis obliterans organizing pneumonia                |
| 10 | 11778011000006118 | boop - bronchiolitis obliterans organising pneumonia         |
| 11 | 11778021000006114 | bronchiolitis obliterans with usual interstitial pneumonitis |
| 12 | 11778031000006112 | boop - bronchiolitis obliterans organizing pneumonia         |
| 13 | 11828571000006115 | bronchiolitis fibrosa obliterans                             |
| 14 | 11932331000006115 | copd gold group a                                            |
| 15 | 11932341000006113 | copd gold group b                                            |
| 16 | 11932351000006110 | copd gold group c                                            |
| 17 | 11932361000006112 | copd gold group d                                            |
| 18 | 121482015         | talc pneumoconiosis                                          |
| 19 | 121968010         | fish-meal workers' lung                                      |
| 20 | 1222334016        | other specified chronic obstructive pulmonary disease        |
| 21 | 1222335015        | chronic obstructive pulmonary disease nos                    |
| 22 | 1223250017        | sarcoidosis of lung                                          |
| 23 | 1224939016        | malt workers' lung                                           |
| 24 | 1227346010        | cystic fibrosis with combined manifestations                 |
| 25 | 1230190015        | macleod's unilateral emphysema                               |
| 26 | 1233152013        | bird-fancier's lung                                          |
| 27 | 1235159019        | maple bark strippers' lung                                   |
| 28 | 123588010         | mucopurulent chronic bronchitis                              |
| 29 | 124281000006119   | suberosis ( cork-handlers' lung )                            |
| 30 | 12482551000006112 | airways obstructn irreversible                               |
| 31 | 12483991000006118 | chronic respiratory conditions due to chemical fumes         |
| 32 | 12489801000006116 | admit copd emergency                                         |
| 33 | 12704691000006117 | interstitial emphysema                                       |
| 34 | 12728161000006116 | chronic obstructive airways disease nos                      |
| 35 | 12759361000006112 | chronic obstructive pulmonary disease nos                    |
| 36 | 128792019         | congenital bronchiectasis                                    |
| 37 | 130626012         | cannabinosis                                                 |
| 38 | 13455018          | rheumatic pneumonia                                          |
| 39 | 139979010         | fetid chronic bronchitis                                     |
| 40 | 141566014         | pigeon-fanciers' lung                                        |
| 41 | 141591000006118   | silica and silicate pneumoconiosis                           |
| 42 | 142162019         | byssinosis                                                   |
| 43 | 142759013         | cystic fibrosis with meconium ileus                          |
| 44 | 142869013         | occupational lung disease                                    |
| 45 | 14610012          | berylliosis                                                  |
| 46 | 1488423019        | chronic obstructive pulmonary disease follow-up              |
| 47 | 1488424013        | chronic obstructive pulmonary disease annual review          |
| 48 | 1494601017        | coad follow-up                                               |
| 49 | 1495466012        | cystic fibrosis with no meconium ileus                       |
| 50 | 1495490013        | meconium ileus in cystic fibrosis                            |

|    |                  |                                                                  |
|----|------------------|------------------------------------------------------------------|
| 1  |                  |                                                                  |
| 2  | 149741000006116  | sequoiosis (red-cedar asthma)                                    |
| 3  | 161781000006116  | sawyer - jones syndrome                                          |
| 4  | 162301000006117  | rheumatoid lung                                                  |
| 5  | 1683181000000112 | chronic obstructive pulmonary disease 3 monthly review           |
| 6  | 1683221000000119 | chronic obstructive pulmonary disease 6 monthly review           |
| 7  | 1699821000006113 | at risk of chronic obstructive pulmonary diseas exacerbation     |
| 8  | 1708971000006117 | cystic fibrosis annual review                                    |
| 9  | 1709161000006116 | arthropathy in cystic fibrosis                                   |
| 10 | 1709341000006117 | liver disease due to cystic fibrosis                             |
| 11 | 1709421000006118 | complication of transplanted lung                                |
| 12 | 1711491000006119 | post-transplant bronchiolitis obliterans syndrome                |
| 13 | 1736361000000112 | cystic fibrosis related cirrhosis                                |
| 14 | 1747711000000111 | interstitial lung disease due to connective tissue disease       |
| 15 | 1759021000006116 | interstitial lung disease due to collagen vascular disease       |
| 16 | 1763641000006113 | cirrhosis of liver due to cystic fibrosis                        |
| 17 | 1763651000006110 | pancreatic sufficient cystic fibrosis                            |
| 18 | 1765681000000110 | history of chronic obstructive pulmonary disease                 |
| 19 | 1771201000006116 | chronic obstructive pulmonary disease multidisciplinary review   |
| 20 | 1778239014       | rheumatoid lung disease                                          |
| 21 | 1783891000006115 | chronic obstructiv pulmonary disease medication optimisation     |
| 22 | 178500017        | extrinsic allergic alveolitis                                    |
| 23 | 1786131000006116 | idiopathic pulmonary fibrosis                                    |
| 24 | 1786505011       | caplan's syndrome                                                |
| 25 | 1786545019       | rheumatoid lung                                                  |
| 26 | 1800881000000119 | post-transplant bronchiolitis obliterans syndrome                |
| 27 | 1811661000006110 | copd self-management plan agreed                                 |
| 28 | 1811741000006117 | copd self-management plan review                                 |
| 29 | 1823851000006119 | chronic obstructive pulmonary disease confirmed                  |
| 30 | 183191000006115  | recurrent wheezy bronchitis                                      |
| 31 | 1850871000006115 | reason for influenza vaccine - chronic respiratory disease       |
| 32 | 1854771000006117 | cystic fibrosis manifested by failure to thrive                  |
| 33 | 1854781000006119 | cystic fibrosis manifested by rectal prolapse                    |
| 34 | 1854791000006116 | cystic fibrosis with liver manifestations                        |
| 35 | 1854801000006115 | cystic fibrosis manifested by pancreatitis                       |
| 36 | 1854811000006117 | cystic fibrosis manifested by acute/persistent respiratory symp. |
| 37 | 1854831000006111 | cystic fibrosis manifested by bronchiectasis                     |
| 38 | 1854841000006118 | cystic fibrosis manifested by electrolyte imbalance              |
| 39 | 1854851000006116 | cystic fibrosis manifested by male infertility                   |
| 40 | 1854861000006119 | cystic fibrosis manifested by malnutrition                       |
| 41 | 1854871000006114 | cystic fibrosis manifested by meconium ileus                     |
| 42 | 1854881000006112 | cystic fibrosis manifested by intestinal obstruction             |
| 43 | 1854901000006114 | cystic fibrosis manifested by malabsorption                      |
| 44 | 1854911000006112 | cystic fibrosis manifested by nasal polyp/sinus disease          |
| 45 | 1882421000006113 | 1 copd exacerbation in past year                                 |
| 46 | 1882431000006111 | 3+ copd exacerbations in past year                               |
| 47 | 1882441000006118 | 2 copd exacerbations in past year                                |
| 48 | 1882451000006116 | no copd exacerbations in past year                               |
| 49 | 189221016        | hypersensitivity pneumonitis                                     |
| 50 | 19421011         | interstitial emphysema                                           |
| 51 | 1948051000006112 | asthma-chronic obstructive pulmonary disease overlap syndrom     |

|    |                  |                                                                           |
|----|------------------|---------------------------------------------------------------------------|
| 1  |                  |                                                                           |
| 2  | 196654011        | cryptogenic fibrosing alveolitis                                          |
| 3  | 2009451000006113 | chronic obstructive pulmonary disease post discharge review               |
| 4  | 2010061000006113 | acute non-infective exacerbation of chronic obstructive pulmonary disease |
| 5  | 207831000006116  | prematurity with interstitial pulmonary fibrosis                          |
| 6  | 20833017         | budgerigar-fanciers' lung                                                 |
| 7  | 211391000006118  | postinflammatory pulmonary fibrosis                                       |
| 8  | 21163015         | bronchiectasis                                                            |
| 9  | 2152091000000112 | has chronic obstructive pulmonary disease care plan                       |
| 10 | 2156690018       | cheese-washers' lung                                                      |
| 11 | 2160051010       | admit copd emergency                                                      |
| 12 | 216596014        | end stage chronic obstructive airways disease                             |
| 13 | 219651000006116  | pneumoconioses                                                            |
| 14 | 2222561000000111 | exacerbation of cystic fibrosis                                           |
| 15 | 2404941000000118 | h/o: bronchiectasis                                                       |
| 16 | 2411019          | silicosis                                                                 |
| 17 | 2475606014       | usual interstitial pneumonitis                                            |
| 18 | 24973018         | bauxite fibrosis of lung                                                  |
| 19 | 2511231000006117 | pneumoconiosis due to silica                                              |
| 20 | 2511251000006112 | nodular silicosis                                                         |
| 21 | 2511261000006114 | silicatoses                                                               |
| 22 | 2511271000006119 | pneumoconiosis caused by silica                                           |
| 23 | 2578881000006118 | panacinar emphysema                                                       |
| 24 | 2578901000006116 | vesicular emphysema                                                       |
| 25 | 2578911000006118 | alveolar emphysema of lung                                                |
| 26 | 2620011000006112 | rheumatic pneumonitis                                                     |
| 27 | 2631591000006117 | beryllium disease                                                         |
| 28 | 2631601000006113 | beryllium poisoning                                                       |
| 29 | 264537018        | airways obstructn irreversible                                            |
| 30 | 2670341000006112 | diffuse interstitial rheumatoid disease of lung                           |
| 31 | 2675247013       | liver disease due to cystic fibrosis                                      |
| 32 | 2676188013       | interstitial lung disease due to collagen vascular disease                |
| 33 | 268099017        | other specified transplantation of lung                                   |
| 34 | 268100013        | transplantation of lung nos                                               |
| 35 | 2692491000006117 | budgerigar-fanciers' disease                                              |
| 36 | 2692511000006111 | budgerigar-breeders' lung                                                 |
| 37 | 269761000006112  | obliterative bronchiolitis due to chemical fumes                          |
| 38 | 27096010         | giant bullous emphysema                                                   |
| 39 | 2712171000006116 | suberosis                                                                 |
| 40 | 2712181000006118 | cork-handlers' disease                                                    |
| 41 | 2712191000006115 | cork-handlers' lung                                                       |
| 42 | 2716231000006114 | chronic obstructive lung disease                                          |
| 43 | 2716241000006116 | chronic airway obstruction                                                |
| 44 | 2716251000006119 | chronic irreversible airway obstruction                                   |
| 45 | 2716261000006117 | chronic airflow obstruction                                               |
| 46 | 2716271000006112 | cafl - chronic airflow limitation                                         |
| 47 | 2716291000006113 | cao - chronic airflow obstruction                                         |
| 48 | 2716301000006114 | chronic airflow limitation                                                |
| 49 | 2716311000006112 | cal - chronic airflow limitation                                          |
| 50 | 2716321000006116 | copd - chronic obstructive pulmonary disease                              |
| 51 | 2716341000006111 | chronic airway disease                                                    |



|    |                  |                                                         |
|----|------------------|---------------------------------------------------------|
| 1  |                  |                                                         |
| 2  | 2716351000006113 | cold - chronic obstructive lung disease                 |
| 3  | 2732761000006118 | bauxite fibrosis of lung                                |
| 4  | 2732771000006113 | bauxite fume pneumoconiosis                             |
| 5  | 2732781000006111 | bauxite pneumoconiosis                                  |
| 6  | 2732791000006114 | bauxite workers' disease                                |
| 7  | 2732801000006110 | corundum smelters' lung                                 |
| 8  | 2732811000006113 | bauxite lung                                            |
| 9  | 2732821000006117 | bauxite pulmonary fibrosis                              |
| 10 | 2732831000006119 | bauxite fibrosis                                        |
| 11 | 2732841000006112 | shavers' disease                                        |
| 12 | 2763561000006112 | coffee-workers' disease                                 |
| 13 | 2763571000006117 | coffee workers disease                                  |
| 14 | 2775991000006115 | graphite fibrosis of lung                               |
| 15 | 2776001000006119 | graphitosis                                             |
| 16 | 2776011000006116 | graphite pneumoconiosis                                 |
| 17 | 2776021000006112 | graphite lung disease                                   |
| 18 | 2776031000006110 | graphite fibrosis                                       |
| 19 | 2785461000006110 | pneumoconiosis caused by inorganic dust                 |
| 20 | 2796611000006118 | farmers' lung disease                                   |
| 21 | 2796621000006114 | moldy-hay disease                                       |
| 22 | 2796631000006112 | mouldy-hay disease                                      |
| 23 | 2796641000006119 | mouldy hay disease                                      |
| 24 | 2796651000006117 | moldy hay disease                                       |
| 25 | 2796661000006115 | farmers lung                                            |
| 26 | 2806071000006119 | grain-handlers' lung                                    |
| 27 | 28128015         | coffee-workers' lung                                    |
| 28 | 285100019        | emphysematous bronchitis                                |
| 29 | 285104011        | obstructive chronic bronchitis                          |
| 30 | 2860331000006118 | amianthosis                                             |
| 31 | 2860341000006111 | asbestos pneumoconiosis                                 |
| 32 | 2860351000006113 | pulmonary asbestosis                                    |
| 33 | 2867041000006113 | post-tuberculous bronchiectasis                         |
| 34 | 2871871000006110 | sequoiosis                                              |
| 35 | 2871881000006113 | red-cedar asthma                                        |
| 36 | 2871891000006111 | sequoiasis                                              |
| 37 | 287930013        | sarcoidosis of lung with sarcoidosis of lymph nodes     |
| 38 | 2914471000006114 | malt-workers' lung                                      |
| 39 | 2914481000006112 | malt-workers' alveolitis                                |
| 40 | 2914491000006110 | malt-workers' lung disease                              |
| 41 | 2914501000006119 | malt fever                                              |
| 42 | 2914511000006116 | malt house workers' cough                               |
| 43 | 2914521000006112 | alveolitis due to aspergillus clavatus and/or fumigatus |
| 44 | 2914541000006117 | malt workers lung                                       |
| 45 | 291961000006112  | 'ventilation' pneumonitis                               |
| 46 | 293528019        | cystic fibrosis                                         |
| 47 | 293530017        | fibrocystic disease                                     |
| 48 | 293532013        | mucoviscidosis                                          |
| 49 | 293537019        | cystic fibrosis with intestinal manifestations          |
| 50 | 293539016        | cystic fibrosis nos                                     |
| 51 | 29395011         | graphite fibrosis of lung                               |

|    |                  |                                                              |
|----|------------------|--------------------------------------------------------------|
| 1  |                  |                                                              |
| 2  | 2973011000006115 | coal pneumoconiosis                                          |
| 3  | 2973021000006111 | colliers' lung                                               |
| 4  | 2973031000006114 | colliers' anthracosis                                        |
| 5  | 2973041000006116 | miners' lung                                                 |
| 6  | 2973051000006119 | melanedema                                                   |
| 7  | 2973061000006117 | anthracosis                                                  |
| 8  | 2973071000006112 | black lung disease                                           |
| 9  | 2973081000006110 | coal workers' lung                                           |
| 10 | 2973091000006113 | miners' asthma                                               |
| 11 | 2973101000006119 | lung melanosis                                               |
| 12 | 2973111000006116 | pneumomelanosis                                              |
| 13 | 2973121000006112 | coal miners' lung                                            |
| 14 | 2973131000006110 | coal miners' pneumoconiosis                                  |
| 15 | 2973141000006117 | melanoedema                                                  |
| 16 | 2973151000006115 | cwp - coalworkers pneumoconiosis                             |
| 17 | 2973161000006118 | coal worker's lung                                           |
| 18 | 299001000000116  | chronic obstructive pulmonary disease disturbs sleep         |
| 19 | 299031000000110  | chronic obstructive pulmonary disease does not disturb sleep |
| 20 | 301127010        | obliterating fibrous bronchiolitis                           |
| 21 | 301444018        | simple chronic bronchitis nos                                |
| 22 | 301448015        | mucopurulent chronic bronchitis nos                          |
| 23 | 301450011        | chronic asthmatic bronchitis                                 |
| 24 | 301451010        | chronic wheezy bronchitis                                    |
| 25 | 301453013        | acute exacerbation of chronic obstructive airways disease    |
| 26 | 301455018        | obstructive chronic bronchitis nos                           |
| 27 | 301456017        | mixed simple and mucopurulent chronic bronchitis             |
| 28 | 301457014        | other chronic bronchitis                                     |
| 29 | 301458016        | other chronic bronchitis nos                                 |
| 30 | 301459012        | chronic bronchitis nos                                       |
| 31 | 301460019        | chronic bullous emphysema                                    |
| 32 | 301463017        | segmental bullous emphysema                                  |
| 33 | 301464011        | zonal bullous emphysema                                      |
| 34 | 301468014        | chronic bullous emphysema nos                                |
| 35 | 301469018        | other emphysema                                              |
| 36 | 301470017        | acute vesicular emphysema                                    |
| 37 | 301477019        | emphysema nos                                                |
| 38 | 301524014        | recurrent bronchiectasis                                     |
| 39 | 301525010        | post-infective bronchiectasis                                |
| 40 | 301526011        | bronchiectasis nos                                           |
| 41 | 301527019        | bird-fancier's lung nos                                      |
| 42 | 301528012        | other allergic alveolitis                                    |
| 43 | 301529016        | pituitary snuff-takers' disease                              |
| 44 | 301530014        | air-conditioner and humidifier lung                          |
| 45 | 301531013        | other allergic alveolitis nos                                |
| 46 | 301532018        | allergic alveolitis and pneumonitis nos                      |
| 47 | 301533011        | allergic extrinsic alveolitis nos                            |
| 48 | 301534017        | hypersensitivity pneumonitis nos                             |
| 49 | 301539010        | other specified chronic obstructive airways disease          |
| 50 | 301545019        | chronic obstructive airways disease nos                      |
| 51 | 301552017        | asbestosis nos                                               |

|    |                  |                                                                |
|----|------------------|----------------------------------------------------------------|
| 1  |                  |                                                                |
| 2  | 301555015        | massive silicotic fibrosis                                     |
| 3  | 301556019        | silica pneumoconiosis nos                                      |
| 4  | 301557011        | pneumoconiosis due to other inorganic dust                     |
| 5  | 301558018        | pneumoconiosis due to inorganic dust nos                       |
| 6  | 301559014        | pneumopathy due to inhalation of other dust                    |
| 7  | 301561017        | pneumopathy due to inhalation of other dust nos                |
| 8  | 301562012        | pneumoconiosis nos                                             |
| 9  | 301563019        | pneumoconiosis associated with tuberculosis                    |
| 10 | 301571015        | chronic respiratory conditions due to chemical fumes           |
| 11 | 301572010        | chronic emphysema due to chemical fumes                        |
| 12 | 301575012        | chronic pulmonary fibrosis due to chemical fumes               |
| 13 | 301576013        | chronic respiratory conditions due to chemical fumes nos       |
| 14 | 301609011        | chronic pulmonary radiation disease                            |
| 15 | 301610018        | chronic pulmonary radiation disease nos                        |
| 16 | 301611019        | drug-induced interstitial lung disorders                       |
| 17 | 301613016        | chronic drug-induced interstitial lung disorders               |
| 18 | 301709019        | idiopathic fibrosing alveolitis nos                            |
| 19 | 301716018        | lung disease with systemic sclerosis                           |
| 20 | 301718017        | pulmonary amyloidosis                                          |
| 21 | 301719013        | lung disease with polymyositis                                 |
| 22 | 301720019        | lung disease with sjogren's disease                            |
| 23 | 301721015        | lung disease with systemic lupus erythematosus                 |
| 24 | 301795015        | chronic pulmonary insufficiency following surgery              |
| 25 | 301835010        | [x]other emphysema                                             |
| 26 | 301836011        | [x]other specified chronic obstructive pulmonary disease       |
| 27 | 301838012        | [x]pneumoconiosis due to other dust containing silica          |
| 28 | 301839016        | [x]pneumoconiosis due to other specified inorganic dusts       |
| 29 | 301852014        | [x]other interstitial pulmonary diseases with fibrosis         |
| 30 | 3023061000006115 | heart-lung transplant with recipient cardiectomy-pneumonectomy |
| 31 | 3023071000006110 | hltx - heart lung transplant                                   |
| 32 | 3103581000006115 | extrinsic allergic bronchiolo-alveolitis                       |
| 33 | 3103591000006117 | hypersensitivity pneumonia                                     |
| 34 | 3103601000006113 | allergic alveolitis                                            |
| 35 | 3103611000006111 | allergic pneumonitis                                           |
| 36 | 3103621000006115 | allergic interstitial pneumonitis                              |
| 37 | 3103641000006110 | ea - extrinsic allergic alveolitis                             |
| 38 | 311496011        | fibrosing alveolitis associated with rheumatoid arthritis      |
| 39 | 3145221000006111 | obliterative bronchiolitis                                     |
| 40 | 3145231000006114 | ob - obliterative bronchiolitis                                |
| 41 | 3145561000006115 | pk - pneumoconiosis                                            |
| 42 | 31510012         | farmers' lung                                                  |
| 43 | 3152451000006114 | idiopathic pulmonary hemosiderosis                             |
| 44 | 3152461000006111 | brown induration of lung                                       |
| 45 | 3152471000006116 | pulmonary hemosiderosis                                        |
| 46 | 3152481000006118 | pulmonary haemosiderosis                                       |
| 47 | 3152491000006115 | iph - idiopathic pulmonary haemosiderosis                      |
| 48 | 3152501000006111 | iph - idiopathic pulmonary hemosiderosis                       |
| 49 | 3154151000006111 | massive silicotic fibrosis of lung                             |
| 50 | 3154161000006113 | massive fibrosis of lung co-occurrent and due to silicosis     |
| 51 | 3169561000006112 | detergent workers' lung                                        |

|    |                  |                                                             |
|----|------------------|-------------------------------------------------------------|
| 1  |                  |                                                             |
| 2  | 3183591000006116 | bronchiectasis, chronic sinusitis and dextrocardia syndrome |
| 3  | 3228301000006115 | unilateral emphysema                                        |
| 4  | 3228311000006117 | macleod's syndrome                                          |
| 5  | 3228321000006113 | unilateral hyperlucent lung                                 |
| 6  | 3228331000006111 | swyer-james syndrome                                        |
| 7  | 3257341000006116 | chronic pulmonary edema                                     |
| 8  | 3282201000006119 | humidifier lung                                             |
| 9  | 3282211000006116 | air conditioner lung                                        |
| 10 | 3282221000006112 | ventilation pneumonitis                                     |
| 11 | 3282231000006110 | humidifier and/or air conditioning pneumonitis              |
| 12 | 3282241000006117 | sauna takers lung                                           |
| 13 | 3319081000006115 | pulmonary hemosiderosis with glomerulonephritis             |
| 14 | 3319111000006114 | pulmonary haemosiderosis with glomerulonephritis            |
| 15 | 3331011000006115 | tin miners' lung                                            |
| 16 | 3331021000006111 | tin oxide pneumoconiosis                                    |
| 17 | 3331031000006114 | tin pneumoconiosis                                          |
| 18 | 3336391000006117 | fibrosis of lung                                            |
| 19 | 3336411000006117 | cirrhosis of lung                                           |
| 20 | 3348511000006118 | mushroom-workers' disease                                   |
| 21 | 3348521000006114 | mushroom pickers' disease                                   |
| 22 | 3348531000006112 | mushroom workers lung                                       |
| 23 | 3425361000006112 | wood-workers' lung                                          |
| 24 | 3425401000006119 | wood pulp workers' lung                                     |
| 25 | 348547019        | single lung transplant                                      |
| 26 | 348550016        | double lung transplant                                      |
| 27 | 350120014        | asbestos-induced pleural plaque                             |
| 28 | 350121013        | pleural plaque disease due to asbestosis                    |
| 29 | 350255018        | progressive massive fibrosis                                |
| 30 | 3513691000006110 | pulmonary siderosis                                         |
| 31 | 3513701000006110 | arc-welders' lung                                           |
| 32 | 3513711000006113 | arc-welders' pneumoconiosis                                 |
| 33 | 3513721000006117 | welders' lung                                               |
| 34 | 3513731000006119 | arc-welders' disease                                        |
| 35 | 3513741000006112 | welders' siderosis                                          |
| 36 | 3513751000006114 | arc-welders' nodulation                                     |
| 37 | 3513761000006111 | iron oxide lung                                             |
| 38 | 3513771000006116 | pneumoconiosis siderotico                                   |
| 39 | 3513781000006118 | siderotic lung disease                                      |
| 40 | 3513791000006115 | steel grinders' disease                                     |
| 41 | 3513801000006119 | iron pneumoconiosis                                         |
| 42 | 3593701000006114 | bagasse disease                                             |
| 43 | 3593711000006112 | bagasse workers' disease                                    |
| 44 | 3593721000006116 | bagasse workers' lung                                       |
| 45 | 3593731000006118 | sugar cane workers' hypersensitivity pneumonitis            |
| 46 | 3611791000006110 | centriacinar emphysema                                      |
| 47 | 362091000000110  | single lobe lung transplant                                 |
| 48 | 3627661000006112 | bird breeders' lung                                         |
| 49 | 3627671000006117 | bird fanciers' disease                                      |
| 50 | 3627681000006119 | avian protein hypersensitivity                              |
| 51 | 3627691000006116 | bird breeders' disease                                      |

|    |                  |                                                                     |
|----|------------------|---------------------------------------------------------------------|
| 1  |                  |                                                                     |
| 2  | 3627711000006118 | bfl - bird fanciers lung                                            |
| 3  | 3627721000006114 | bird fanciers lung                                                  |
| 4  | 3627731000006112 | bird fanciers' lung                                                 |
| 5  | 3629501000006118 | chronic respiratory condition due to fumes and/or vapours           |
| 6  | 3629511000006115 | chronic respiratory condition due to fumes and/or vapors            |
| 7  | 3629521000006111 | chronic respiratory condition caused by fumes and/or vapours        |
| 8  | 3629531000006114 | chronic respiratory condition caused by fumes and/or vapors         |
| 9  | 3629531000006114 | chronic respiratory condition caused by fumes and/or vapors         |
| 10 | 3657901000006117 | fibrosis of lung following radiation                                |
| 11 | 3657911000006119 | radiation fibrosis of lung                                          |
| 12 | 3689711000006118 | pneumoconiosis due to talc                                          |
| 13 | 3689711000006118 | pneumoconiosis due to talc                                          |
| 14 | 3689721000006114 | talcosis                                                            |
| 15 | 3689731000006112 | pulmonary talcosis                                                  |
| 16 | 3689741000006119 | talc lung disease                                                   |
| 17 | 3689761000006115 | talc workers' pneumoconiosis                                        |
| 18 | 3689771000006110 | pneumoconiosis caused by talc                                       |
| 19 | 3689771000006110 | pneumoconiosis caused by talc                                       |
| 20 | 3762481000006115 | developmental bronchiectasis                                        |
| 21 | 3764021000006117 | interstitial emphysema of lung                                      |
| 22 | 3764031000006119 | interstitial pulmonary emphysema                                    |
| 23 | 3780471000006116 | cannabosis                                                          |
| 24 | 3780471000006116 | cannabosis                                                          |
| 25 | 3780481000006118 | hemp-workers' disease                                               |
| 26 | 37941013         | asbestosis                                                          |
| 27 | 3824111000006115 | cystic fibrosis without meconium ileus                              |
| 28 | 38677017         | tuberculous bronchiectasis                                          |
| 29 | 3873191000006110 | fetid chronic bronchitis                                            |
| 30 | 3888281000006116 | pigeon-fanciers' disease                                            |
| 31 | 3888281000006116 | pigeon-fanciers' disease                                            |
| 32 | 3888301000006117 | pigeon-breeders' lung                                               |
| 33 | 3888311000006119 | pigeon-breeders' disease                                            |
| 34 | 3888321000006110 | pigeon breeders' lung                                               |
| 35 | 3888321000006110 | pigeon breeders' lung                                               |
| 36 | 3894081000006118 | cotton workers' lung disease                                        |
| 37 | 3894091000006115 | cotton-dust asthma                                                  |
| 38 | 3894101000006114 | mill fever                                                          |
| 39 | 3907551000006116 | mucoviscidosis involving the lung                                   |
| 40 | 3907561000006119 | pulmonary cystic fibrosis                                           |
| 41 | 3908891000006112 | maple-bark strippers' lung                                          |
| 42 | 3908891000006112 | maple-bark strippers' lung                                          |
| 43 | 3908901000006111 | alveolitis due to cryptostroma corticale                            |
| 44 | 3908911000006114 | maple-bark disease                                                  |
| 45 | 3908921000006118 | maple-bark strippers' disease                                       |
| 46 | 3908941000006113 | maple bark strippers lung                                           |
| 47 | 3921361000006112 | emphysema of lung                                                   |
| 48 | 3921361000006112 | emphysema of lung                                                   |
| 49 | 3930661000006110 | transplant of lung                                                  |
| 50 | 3955621000006112 | catarrhal bronchitis                                                |
| 51 | 396108018        | bullous emphysema with collapse                                     |
| 52 | 396109014        | atrophic (senile) emphysema                                         |
| 53 | 396110016        | other emphysema nos                                                 |
| 54 | 396110016        | other emphysema nos                                                 |
| 55 | 3972641000006113 | aluminum pneumoconiosis                                             |
| 56 | 3972651000006110 | aluminium pneumoconiosis                                            |
| 57 | 405080018        | h/o: chr.obstr. airway disease                                      |
| 58 | 405121000000111  | health education - chronic obstructive pulmonary disease            |
| 59 | 40879015         | pulmonary sarcoidosis                                               |
| 60 | 40879015         | pulmonary sarcoidosis                                               |
|    | 424365019        | acute infective exacerbation of chronic obstructive airways disease |

|    |                  |                                                             |
|----|------------------|-------------------------------------------------------------|
| 1  |                  |                                                             |
| 2  | 4510801000006114 | end stage chronic obstructive pulmonary disease             |
| 3  | 451084014        | cystic fibrosis with other manifestations                   |
| 4  | 4542691000006113 | history of being lung transplant recipient                  |
| 5  | 4542701000006113 | history of lung transplant                                  |
| 6  | 457168017        | mild chronic obstructive pulmonary disease                  |
| 7  | 457169013        | moderate chronic obstructive pulmonary disease              |
| 8  | 457171013        | severe chronic obstructive pulmonary disease                |
| 9  | 457581000006111  | acute interstitial emphysema                                |
| 10 | 460650019        | [v]lung transplanted                                        |
| 11 | 4635301000006114 | airways obstruction irreversible                            |
| 12 | 4732991000006119 | chronic bronchitis with emphysema                           |
| 13 | 4733001000006118 | bronchitis with airway obstruction                          |
| 14 | 4733011000006115 | cob - chronic obstructive bronchitis                        |
| 15 | 4733021000006111 | obstructive chronic bronchitis                              |
| 16 | 4733031000006114 | chronic obstructive bronchitis                              |
| 17 | 474819014        | cryptogenic organising pneumonia                            |
| 18 | 474828010        | bronchiolitis obliterans organising pneumonia               |
| 19 | 475431013        | chronic obstructive pulmonary disease                       |
| 20 | 4760431000006115 | cf - cystic fibrosis                                        |
| 21 | 4760451000006110 | cf                                                          |
| 22 | 477131000006116  | allergic alveolitis and pneumonitis nos                     |
| 23 | 4781421000006111 | acute exacerbation of copd                                  |
| 24 | 4781431000006114 | acute exacerbation of chronic obstructive pulmonary disease |
| 25 | 4781461000006117 | emphysematous bulla                                         |
| 26 | 4781471000006112 | bullous emphysema                                           |
| 27 | 4781641000006119 | postinfectious bronchiectasis                               |
| 28 | 4781801000006115 | chronic respiratory conditions caused by chemical fumes     |
| 29 | 4781821000006113 | chronic emphysema caused by chemical fumes                  |
| 30 | 4781831000006111 | toxic bronchiolitis obliterans                              |
| 31 | 4781841000006118 | chemical bronchiolitis obliterans                           |
| 32 | 4781861000006119 | chronic pulmonary fibrosis caused by chemical fumes         |
| 33 | 4782051000006118 | drug-induced interstitial lung disorder                     |
| 34 | 4782071000006111 | drug induced interstitial lung disease                      |
| 35 | 4782331000006111 | dipf - diffuse interstitial pulmonary fibrosis              |
| 36 | 4782341000006118 | fibrosing alveolitis                                        |
| 37 | 4782361000006119 | uip - usual interstitial pneumonitis                        |
| 38 | 4782401000006112 | scleroderma lung disease                                    |
| 39 | 4782411000006110 | scleroderma of lung                                         |
| 40 | 4782441000006114 | lung disease co-occurrent with polymyositis                 |
| 41 | 4782451000006111 | polymyositis with pulmonary involvement                     |
| 42 | 4782461000006113 | lung disease with sjögren's disease                         |
| 43 | 4782481000006115 | lung disease with sjögren disease                           |
| 44 | 49227017         | coal workers' pneumoconiosis                                |
| 45 | 492443010        | bronchiolitis obliterans                                    |
| 46 | 492658013        | idiopathic pulmonary haemosiderosis                         |
| 47 | 494669012        | chronic pulmonary oedema                                    |
| 48 | 499259012        | siderosis                                                   |
| 49 | 5039311000006114 | sltx - single lung transplant                               |
| 50 | 5039331000006115 | dltx - double lung transplant                               |
| 51 | 5055241000006116 | complicated pneumoconiosis                                  |



|    |                  |                                                                                  |
|----|------------------|----------------------------------------------------------------------------------|
| 1  |                  |                                                                                  |
| 2  | 5055261000006117 | pmf - progressive massive fibrosis                                               |
| 3  | 506053014        | purulent chronic bronchitis                                                      |
| 4  | 508561017        | simple chronic bronchitis                                                        |
| 5  | 508562012        | chronic catarrhal bronchitis                                                     |
| 6  | 516801000000112  | very severe chronic obstructive pulmonary disease                                |
| 7  | 5492481000006115 | postinflammatory pulmonary fibrosis                                              |
| 8  | 5516841000006119 | history of chronic obstructive airway disease                                    |
| 9  | 553211000006119  | chron obstruct pulmonary dis wth acute exacerbation, unspec                      |
| 10 | 555461000006119  | chronic obstruct pulmonary dis with acute lower resp infectn                     |
| 11 | 555471000006114  | chronic obstructive airways disease                                              |
| 12 | 55602016         | compensatory emphysema                                                           |
| 13 | 556271000006115  | chronic pulmonary fibrosis following radiation                                   |
| 14 | 606441000006110  | cystic fibrosis with pulmonary manifestations                                    |
| 15 | 618361000000112  | chronic type 1 respiratory failure                                               |
| 16 | 618371000000117  | chronic type 2 respiratory failure                                               |
| 17 | 621121000006112  | diffuse pulmonary fibrosis                                                       |
| 18 | 640491000006111  | emphysema                                                                        |
| 19 | 6608771000006110 | rheumatoid pneumoconiosis                                                        |
| 20 | 6608781000006113 | caplan's syndrome                                                                |
| 21 | 6608791000006111 | caplans syndrome                                                                 |
| 22 | 6703861000006114 | cheese-workers' lung                                                             |
| 23 | 6703871000006119 | cheese-washers' disease                                                          |
| 24 | 67242018         | chronic respiratory failure                                                      |
| 25 | 6763231000006119 | emergency hospital admission for chronic obstructive pulmonary disease           |
| 26 | 6763251000006114 | emergency hospital admission for copd (chronic obstructive pulmonary disease)    |
| 27 | 7065871000006119 | chronic hypercapnic respiratory failure                                          |
| 28 | 7065881000006116 | chronic type ii respiratory failure                                              |
| 29 | 7084411000006112 | chronic hypoxaemic respiratory failure                                           |
| 30 | 7084421000006116 | chronic hypoxemic respiratory failure                                            |
| 31 | 7084441000006111 | chronic type i respiratory failure                                               |
| 32 | 73655011         | complication of transplanted lung                                                |
| 33 | 7484331000006119 | optimization of medication for chronic obstructive pulmonary disease             |
| 34 | 7484341000006112 | optimization of medication for chronic obstructive lung disease                  |
| 35 | 7484351000006114 | optimisation of medication for chronic obstructive lung disease                  |
| 36 | 75302014         | idiopathic fibrosing alveolitis                                                  |
| 37 | 7532701000006115 | usual interstitial pneumonia                                                     |
| 38 | 7783501000006111 | cryptogenic organizing pneumonia                                                 |
| 39 | 7783511000006114 | cop - cryptogenic organising pneumonitis                                         |
| 40 | 7783521000006118 | cop - cryptogenic organizing pneumonitis                                         |
| 41 | 786581000006114  | idiopathic pulmonary haemosiderosis                                              |
| 42 | 79212010         | simple silicosis                                                                 |
| 43 | 8058301000006110 | copd (chronic obstructive pulmonary disease) disturbs sleep                      |
| 44 | 8058321000006117 | copd (chronic obstructive pulmonary disease) does not disturb sleep              |
| 45 | 8125721000006119 | at risk of copd (chronic obstructive pulmonary disease) exacerbation             |
| 46 | 8235101000006114 | copd (chronic obstructive pulmonary disease) 3 monthly review                    |
| 47 | 8235131000006118 | copd (chronic obstructive pulmonary disease) 6 monthly review                    |
| 48 | 8242561000006112 | cirrhosis associated with cystic fibrosis                                        |
| 49 | 8258171000006110 | bronchiolitis obliterans syndrome after lung transplantation                     |
| 50 | 8260631000006112 | copd (chronic obstructive pulmonary disease) self-management plan review         |
| 51 | 8287171000006115 | acute non-infective exacerbation of copd (chronic obstructive pulmonary disease) |

|    |                  |                                                                      |
|----|------------------|----------------------------------------------------------------------|
| 1  |                  |                                                                      |
| 2  | 83019014         | complicated silicosis                                                |
| 3  | 839001000006111  | copd self-management plan given                                      |
| 4  | 845451000006118  | copd follow-up                                                       |
| 5  | 851261000006116  | chronic bronchitis, acute exac                                       |
| 6  |                  |                                                                      |
| 7  | 85415012         | stannosis                                                            |
| 8  | 85960018         | pulmonary fibrosis                                                   |
| 9  | 85961019         | cirrhosis of lung                                                    |
| 10 | 861571000006118  | lung transplant                                                      |
| 11 | 87088014         | mushroom workers' lung                                               |
| 12 |                  |                                                                      |
| 13 | 87480013         | chronic tracheobronchitis                                            |
| 14 | 885281000006118  | mucopurulent chr. bronchitis                                         |
| 15 | 885331000006110  | coalworker's pneumoconiosis                                          |
| 16 | 885371000006113  | chronic chemical resp. disease                                       |
| 17 | 885431000006115  | radiation lung fibrosis                                              |
| 18 |                  |                                                                      |
| 19 | 885491000006116  | pulmonary fibrosis                                                   |
| 20 | 90511000006115   | transplantation of lung                                              |
| 21 | 907501000006111  | [rfc] pneumoconiosis                                                 |
| 22 | 909711000006111  | [rfc] chronic obstructive pulmonary disease (copd)                   |
| 23 | 909721000006115  | [rfc] emphysema                                                      |
| 24 |                  |                                                                      |
| 25 | 909731000006117  | [rfc] pulmonary fibrosis                                             |
| 26 | 9317331000006113 | asthma-copd overlap syndrome (acos)                                  |
| 27 | 9317341000006115 | acos - asthma-chronic obstructive pulmonary disease overlap syndrome |
| 28 | 9337016          | panlobular emphysema                                                 |
| 29 | 939991000006112  | copd medication review                                               |
| 30 |                  |                                                                      |
| 31 | 966841000006111  | chronic obstructive pulmonary disease clini management plan          |
| 32 | 977891000006112  | copd accident and emergency attendance since last visit              |
| 33 | 977901000006111  | emergency copd admission since last appointment                      |
| 34 | 977911000006114  | number of copd exacerbations in past year                            |
| 35 | 990641000006110  | chronic obst. pulm. dis. nos                                         |
| 36 |                  |                                                                      |
| 37 | 990651000006112  | chr. airway obstruction nos                                          |
| 38 | 998281000006115  | multiple copd emergency hospital admissions                          |
| 39 |                  |                                                                      |
| 40 |                  |                                                                      |
| 41 |                  |                                                                      |
| 42 |                  |                                                                      |
| 43 |                  |                                                                      |
| 44 |                  |                                                                      |
| 45 |                  |                                                                      |
| 46 |                  |                                                                      |
| 47 |                  |                                                                      |
| 48 |                  |                                                                      |
| 49 |                  |                                                                      |
| 50 |                  |                                                                      |
| 51 |                  |                                                                      |
| 52 |                  |                                                                      |
| 53 |                  |                                                                      |
| 54 |                  |                                                                      |
| 55 |                  |                                                                      |
| 56 |                  |                                                                      |
| 57 |                  |                                                                      |
| 58 |                  |                                                                      |
| 59 |                  |                                                                      |
| 60 |                  |                                                                      |



1  
2  
3  
4  
5  
6  
7  
8  
9  
10  
11  
12  
13  
14  
15  
16  
17  
18  
19  
20  
21  
22  
23  
24  
25  
26  
27  
28  
29  
30  
31  
32  
33  
34  
35  
36  
37  
38  
39  
40  
41  
42  
43  
44  
45  
46  
47  
48  
49  
50  
51  
52  
53  
54  
55  
56  
57  
58  
59  
60

For peer review only

1  
2  
3  
4  
5  
6  
7  
8  
9  
10  
11  
12  
13  
14  
15  
16  
17  
18  
19  
20  
21  
22  
23  
24  
25  
26  
27  
28  
29  
30  
31  
32  
33  
34  
35  
36  
37  
38  
39  
40  
41  
42  
43  
44  
45  
46  
47  
48  
49  
50  
51  
52  
53  
54  
55  
56  
57  
58  
59  
60

For peer review only

1  
2  
3  
4  
5  
6  
7  
8  
9  
10  
11  
12  
13  
14  
15  
16  
17  
18  
19  
20  
21  
22  
23  
24  
25  
26  
27  
28  
29  
30  
31  
32  
33  
34  
35  
36  
37  
38  
39  
40  
41  
42  
43  
44  
45  
46  
47  
48  
49  
50  
51  
52  
53  
54  
55  
56  
57  
58  
59  
60

For peer review only

1  
2  
3  
4  
5  
6  
7  
8  
9  
10  
11  
12  
13  
14  
15  
16  
17  
18  
19  
20  
21  
22  
23  
24  
25  
26  
27  
28  
29  
30  
31  
32  
33  
34  
35  
36  
37  
38  
39  
40  
41  
42  
43  
44  
45  
46  
47  
48  
49  
50  
51  
52  
53  
54  
55  
56  
57  
58  
59  
60

For peer review only

1  
2  
3  
4  
5  
6  
7  
8  
9  
10  
11  
12  
13  
14  
15  
16  
17  
18  
19  
20  
21  
22  
23  
24  
25  
26  
27  
28  
29  
30  
31  
32  
33  
34  
35  
36  
37  
38  
39  
40  
41  
42  
43  
44  
45  
46  
47  
48  
49  
50  
51  
52  
53  
54  
55  
56  
57  
58  
59  
60

For peer review only

1  
2  
3  
4  
5  
6  
7  
8  
9  
10  
11  
12  
13  
14  
15  
16  
17  
18  
19  
20  
21  
22  
23  
24  
25  
26  
27  
28  
29  
30  
31  
32  
33  
34  
35  
36  
37  
38  
39  
40  
41  
42  
43  
44  
45  
46  
47  
48  
49  
50  
51  
52  
53  
54  
55  
56  
57  
58  
59  
60

For peer review only

1  
2  
3  
4  
5  
6  
7  
8  
9  
10  
11  
12  
13  
14  
15  
16  
17  
18  
19  
20  
21  
22  
23  
24  
25  
26  
27  
28  
29  
30  
31  
32  
33  
34  
35  
36  
37  
38  
39  
40  
41  
42  
43  
44  
45  
46  
47  
48  
49  
50  
51  
52  
53  
54  
55  
56  
57  
58  
59  
60

For peer review only

1  
2  
3  
4  
5  
6  
7  
8  
9  
10  
11  
12  
13  
14  
15  
16  
17  
18  
19  
20  
21  
22  
23  
24  
25  
26  
27  
28  
29  
30  
31  
32  
33  
34  
35  
36  
37  
38  
39  
40  
41  
42  
43  
44  
45  
46  
47  
48  
49  
50  
51  
52  
53  
54  
55  
56  
57  
58  
59  
60

For peer review only



1  
2  
3  
4  
5  
6  
7  
8  
9  
10  
11  
12  
13  
14  
15  
16  
17  
18  
19  
20  
21  
22  
23  
24  
25  
26  
27  
28  
29  
30  
31  
32  
33  
34  
35  
36  
37  
38  
39  
40  
41  
42  
43  
44  
45  
46  
47  
48  
49  
50  
51  
52  
53  
54  
55  
56  
57  
58  
59  
60

For peer review only

1  
2  
3  
4  
5  
6  
7  
8  
9  
10  
11  
12  
13  
14  
15  
16  
17  
18  
19  
20  
21  
22  
23  
24  
25  
26  
27  
28  
29  
30  
31  
32  
33  
34  
35  
36  
37  
38  
39  
40  
41  
42  
43  
44  
45  
46  
47  
48  
49  
50  
51  
52  
53  
54  
55  
56  
57  
58  
59  
60

For peer review only

e)

1  
2 Procodeid  
3 20041000033117  
4 19841000033111  
5 19941000033115  
6 1714141000033117  
7 1714241000033112  
8 22741000033118  
9 8491641000033114  
10 23641000033119  
11 82541000033119  
12 83741000033117  
13 83641000033114  
14 86441000033116  
15 86541000033115  
16 6029541000033117  
17 130441000033115  
18 131241000033111  
19 128841000033118  
20 139041000033119  
21 161141000033110  
22 160341000033117  
23 1579641000033117  
24 158441000033117  
25 160941000033118  
26 158541000033116  
27 163641000033116  
28 162141000033119  
29 160041000033119  
30 161641000033117  
31 157241000033119  
32 160241000033110  
33 160441000033111  
34 160541000033112  
35 162241000033114  
36 1579541000033118  
37 158641000033115  
38 157341000033112  
39 158841000033119  
40 160641000033113  
41 162741000033115  
42 333541000033115  
43 373641000033117  
44 373741000033114  
45 3198541000033119  
46 3198641000033118  
47 559141000033113  
48 559241000033118  
49 559641000033115  
50 560441000033116  
51 567541000033119

For peer review only

1  
2 567841000033117  
3 569541000033113  
4 563541000033110  
5 1741541000033119  
6 1741641000033118  
7  
8 857241000033112  
9 934741000033118  
10 936341000033114  
11 936241000033116  
12 4499041000033118  
13 4499141000033119  
14 1083841000033113  
15 1084041000033115  
16 1087941000033114  
17 1090741000033111  
18 1143441000033114  
19 1143341000033115  
20 1144641000033113  
21 2622741000033114  
22 1157441000033118  
23 1158041000033114  
24 1163141000033114  
25 1166141000033118  
26 1173741000033115  
27 1172841000033115  
28 1174541000033113  
29 2588241000033119  
30 2086541000033119  
31 1381841000033111  
32 1381941000033115  
33 1221341000033118  
34 1241241000033114  
35 1245841000033110  
36 2640741000033111  
37 1241341000033116  
38 1768141000033111  
39 1245141000033116  
40 5393141000033116  
41 5393241000033111  
42 1257441000033115  
43 1257541000033119  
44 1221441000033112  
45 1751341000033111  
46 4498941000033110  
47 4498841000033119  
48 3343941000033118  
49 1241441000033110  
50 1222341000033110  
51 6116941000033117  
52 1246041000033112

For peer review only

1  
2 2726241000033113  
3 1250141000033112  
4 1228841000033115  
5 1905641000033119  
6 1907541000033112  
7  
8 1257641000033118  
9 1256141000033114  
10 2726341000033115  
11 1250241000033117  
12 1228941000033111  
13  
14 1905741000033111  
15 1682141000033115  
16 1255441000033110  
17 1257741000033110  
18 1241641000033112  
19  
20 6117041000033116  
21 1245741000033117  
22 1242941000033112  
23 1250341000033110  
24 1682241000033110  
25 1255541000033111  
26 2174141000033117  
27 1206041000033115  
28 1206241000033111  
29 1207741000033115  
30  
31 2864041000033119  
32 2952141000033110  
33 1221541000033113  
34 1228341000033112  
35 1228441000033118  
36  
37 1913441000033115  
38 1903141000033113  
39 1907341000033117  
40 1907441000033111  
41 1907641000033113  
42 3344041000033116  
43 1241941000033117  
44 1241541000033111  
45 1905441000033116  
46 1245941000033119  
47 1252241000033118  
48 1252341000033111  
49 1252441000033117  
50 1253341000033115  
51 1255041000033118  
52 1254741000033116  
53 1255341000033116  
54 1256941000033111  
55 1257041000033112  
56 1206441000033112  
57  
58  
59  
60

For peer review only

1  
2 1242441000033119  
3 1242541000033118  
4 1242341000033113  
5 1252141000033113  
6 1254241000033110  
7  
8 1257241000033116  
9 1258641000033117  
10 1258741000033114  
11 1424341000033115  
12  
13 1422641000033118  
14 1699541000033116  
15 1419341000033114  
16 1423441000033112  
17 1419441000033115  
18  
19 1699041000033114  
20 1426741000033111  
21 1915441000033119  
22 1426841000033118  
23 1915341000033113  
24  
25 1422941000033113  
26 1422541000033119  
27 1422741000033110  
28 1422841000033117  
29 1429441000033110  
30  
31 1705641000033112  
32 1705741000033115  
33 1510341000033111  
34 1506841000033119  
35 1510441000033117  
36 1506941000033110  
37  
38 1705441000033110  
39 1509541000033112  
40 1510541000033116  
41 1505741000033119  
42  
43 1512041000033110  
44 1510641000033115  
45 1508241000033119  
46 1509641000033113  
47 1508941000033111  
48  
49 1510241000033118  
50 1513441000033110  
51 1513541000033111  
52 1505941000033116  
53 1508041000033110  
54 1508141000033114  
55 1510741000033112  
56 1511441000033114  
57 1512541000033117  
58 1512641000033116  
59  
60 1526541000033113

For peer review only

1  
2 1526641000033114  
3 20441000033114  
4 20541000033110  
5 88541000033116  
6 88241000033118  
7  
8 3075541000033113  
9 4958541000033110  
10 88341000033111  
11 88441000033117  
12  
13 90041000033110  
14 89441000033110  
15 89941000033117  
16 89841000033113  
17 12430241000033117  
18 773741000033113  
19  
20 4519441000033116  
21 773841000033115  
22 5072941000033118  
23 772841000033113  
24 772641000033112  
25 3075441000033112  
26 4958441000033114  
27 772941000033117  
28 773041000033110  
29 772541000033111  
30 773941000033111  
31 773641000033116  
32 1024041000033114  
33 1022241000033110  
34 1022141000033115  
35 1024141000033113  
36 1672141000033113  
37 1672241000033118  
38 1702541000033116  
39 1702641000033115  
40 13283241000033112  
41 330241000033113  
42 1818641000033117  
43 380841000033118  
44 485841000033117  
45 488041000033119  
46 491541000033117  
47 3163641000033110  
48 1860741000033110  
49 4023941000033117  
50 3163441000033113  
51 5098441000033118  
52 3163541000033114  
53 5098641000033116  
54 13557241000033117

For peer review only

1  
2 2873041000033114  
3 2873141000033113  
4 2873241000033118  
5 2873341000033111  
6 121141000033119  
7 121241000033114  
8 121341000033116  
9 123241000033110  
10 129041000033117  
11 1577941000033118  
12 123441000033111  
13 129241000033113  
14 123341000033117  
15 129141000033118  
16 121641000033112  
17 136641000033115  
18 126641000033118  
19 124041000033116  
20 129341000033115  
21 136741000033112  
22 131641000033114  
23 2725541000033116  
24 3081341000033111  
25 3081041000033114  
26 3082041000033116  
27 3080741000033119  
28 3083041000033113  
29 3082341000033119  
30 3081741000033112  
31 3082841000033111  
32 2725641000033115  
33 3081441000033117  
34 3081141000033113  
35 3082141000033117  
36 3082641000033110  
37 3081641000033115  
38 3942841000033114  
39 3080541000033110  
40 3082441000033113  
41 3080441000033114  
42 3942941000033118  
43 2725741000033112  
44 3081541000033116  
45 3081241000033118  
46 3081941000033110  
47 3082541000033114  
48 3080641000033111  
49 3082941000033115  
50 3082241000033112  
51 3081841000033119

For peer review only



1  
2 3082741000033118  
3 133641000033110  
4 123041000033119  
5 123141000033115  
6 2845741000033112  
7 2845541000033116  
8 2845641000033115  
9 2845441000033117  
10 2845341000033111  
11 1913641000033118  
12 1914041000033110  
13 1913541000033119  
14 123541000033112  
15 123641000033113  
16 123741000033116  
17 126341000033114  
18 126441000033115  
19 126541000033119  
20 1903341000033111  
21 1903441000033117  
22 1903241000033118  
23 1905941000033114  
24 1906041000033116  
25 1905841000033118  
26 1913741000033110  
27 1913841000033117  
28 1913941000033113  
29 2174341000033119  
30 2174441000033113  
31 2174241000033112  
32 2622841000033116  
33 2622941000033112  
34 2623041000033119  
35 129541000033110  
36 128941000033114  
37 121841000033113  
38 129641000033111  
39 129441000033114  
40 130041000033112  
41 1577841000033114  
42 130141000033111  
43 1905541000033115  
44 2845241000033118  
45 2845141000033113  
46 136841000033119  
47 136341000033111  
48 136441000033117  
49 136541000033116  
50 137441000033119  
51 137541000033118

For peer review only

1  
2 137341000033113  
3 139341000033117  
4 139441000033111  
5 139541000033112  
6 139741000033116  
7 137941000033112  
8 136941000033110  
9 126741000033110  
10 137041000033111  
11 126841000033117  
12 137241000033115  
13 126941000033113  
14 136141000033113  
15 136041000033114  
16 123941000033118  
17 129841000033112  
18 137641000033117  
19 131441000033112  
20 137741000033114  
21 138041000033110  
22 123841000033114  
23 129941000033116  
24 137841000033116  
25 139841000033114  
26 121941000033117  
27 121741000033115  
28 5393341000033118  
29 5393441000033112  
30 3871541000033110  
31 4815041000033111  
32 1915241000033115  
33 2726041000033117  
34 2725841000033119  
35 3256341000033119  
36 3141341000033112  
37 3871641000033111  
38 163741000033113  
39 4815141000033110  
40 2726141000033118  
41 2725941000033110  
42 3871741000033119  
43 1915141000033110  
44 163841000033115  
45 1579841000033116  
46 1579941000033112  
47 1580041000033111  
48 2798441000033118  
49 171241000033113  
50 171341000033115  
51 171541000033110

For peer review only

1  
2 171441000033114  
3 171741000033119  
4 171641000033111  
5 174641000033114  
6 174441000033112  
7 174541000033113  
8 4823241000033113  
9 3227441000033112  
10 3227541000033113  
11 3267641000033115  
12 3943341000033113  
13 3943441000033119  
14 3943641000033117  
15 3943041000033111  
16 3343041000033119  
17 3871841000033112  
18 3871941000033116  
19 3872041000033110  
20 576141000033117  
21 576241000033112  
22 576341000033119  
23 1730441000033113  
24 590841000033115  
25 581241000033110  
26 576741000033118  
27 2067541000033118  
28 590941000033111  
29 581341000033117  
30 576841000033111  
31 2067641000033117  
32 585741000033118  
33 1730341000033119  
34 591441000033110  
35 581841000033114  
36 577041000033119  
37 591041000033118  
38 581441000033111  
39 576941000033115  
40 2148541000033119  
41 585641000033110  
42 586241000033117  
43 585841000033111  
44 2067741000033114  
45 2067841000033116  
46 586041000033113  
47 1730541000033114  
48 1730641000033110  
49 2148441000033115  
50 591141000033119  
51 1914841000033115

For peer review only

1  
2 1914441000033118  
3 591241000033114  
4 1914941000033111  
5 1914541000033117  
6 591541000033111  
7 1915041000033111  
8 1914641000033116  
9 591341000033116  
10 1914741000033113  
11 1914341000033112  
12 577141000033115  
13 577241000033110  
14 577341000033117  
15 577441000033111  
16 581541000033112  
17 581641000033113  
18 581741000033116  
19 581941000033118  
20 585941000033115  
21 586341000033110  
22 586141000033112  
23 12530441000033112  
24 12530541000033113  
25 5811241000033111  
26 5811341000033118  
27 2872641000033111  
28 2872841000033112  
29 2872941000033116  
30 2872741000033119  
31 3141441000033118  
32 3256441000033113  
33 1144441000033111  
34 1145341000033116  
35 4815241000033115  
36 1144541000033112  
37 1145141000033119  
38 1143041000033117  
39 4815341000033113  
40 2798341000033112  
41 1145241000033114  
42 1143141000033118  
43 1144341000033117  
44 1144241000033110  
45 1144841000033114  
46 1144941000033118  
47 1670741000033111  
48 1670841000033118  
49 1670941000033114  
50 2623141000033115  
51 2623241000033110

For peer review only

1  
2 2623341000033117  
3 1671341000033119  
4 1671141000033117  
5 3199341000033119  
6 1671241000033112  
7 1671041000033116  
8 3199241000033112  
9 12901441000033118  
10 12901541000033117  
11 12901641000033116  
12 12901341000033112  
13 13740941000033111  
14 13740841000033115  
15 1505841000033112  
16 1510841000033119  
17 1511041000033117  
18 3347141000033113  
19 497341000033117  
20 497441000033111  
21 498041000033115  
22 599641000033111  
23 3089841000033115  
24 3089741000033113  
25 3347041000033114  
26 3089641000033116  
27 4063341000033111  
28 4063241000033118  
29 4063541000033116  
30 5707041000033111  
31 5707141000033110  
32 6456541000033118  
33 9299341000033119  
34 5707241000033115  
35 5707341000033113  
36 1022341000033117  
37 1022441000033111  
38 5140041000033112  
39 5140141000033111  
40 1206341000033118  
41 3855941000033115  
42 1252041000033114  
43 1914241000033119  
44 1914141000033114  
45 1205941000033113  
46 1228741000033113  
47 3856041000033113  
48 1267641000033111  
49 1272941000033113  
50 1268941000033117  
51 1267441000033114

For peer review only

1 11782841000033117  
2 9299441000033113  
3 8536141000033111  
4 13179041000033114  
5 13178941000033117  
6 3347141000033113  
7 497341000033117  
8 497441000033111  
9 498041000033115  
10 599641000033111  
11 3089841000033115  
12 3089741000033113  
13 3347041000033114  
14 3089641000033116  
15 4063341000033111  
16 4063241000033118  
17 4063541000033116  
18 5707041000033111  
19 5707141000033110  
20 6456541000033118  
21 9299341000033119  
22 5707241000033115  
23 5707341000033113  
24 1022341000033117  
25 1022441000033111  
26 5140041000033112  
27 5140141000033111  
28 1206341000033118  
29 3855941000033115  
30 1252041000033114  
31 1914241000033119  
32 1914141000033114  
33 1205941000033113  
34 1228741000033113  
35 3856041000033113  
36 1267641000033111  
37 1272941000033113  
38 1268941000033117  
39 1267441000033114  
40 11782841000033117  
41 9299441000033113  
42 8536141000033111  
43 13179041000033114  
44 13178941000033117  
45 11899741000033117  
46 12197841000033113  
47 12197941000033117  
48 10715041000033111  
49 12370841000033110  
50 12370941000033119

For peer review only

1  
2 9531441000033113  
3 4418141000033112  
4 10735041000033115  
5 10740041000033111  
6 3164341000033116  
7 3164441000033110  
8 11707241000033115  
9 3164541000033111  
10 12579441000033119  
11 12579541000033118  
12 12579341000033113  
13 9342741000033111  
14 9342841000033118  
15 12634941000033116  
16 8101741000033115  
17 3163841000033111  
18 8101841000033113  
19 3163941000033115  
20 12635041000033116  
21 8101641000033112  
22 3163741000033118  
23 8946841000033112  
24 8946941000033116  
25 3164041000033118  
26 3164141000033119  
27 3164241000033114  
28 8102041000033111  
29 8102141000033110  
30 8101941000033117  
31 12635141000033117  
32 12635241000033112  
33 12430741000033111  
34 12403741000033110  
35 12434441000033111  
36 4418241000033117  
37 10740141000033110  
38 9537441000033115  
39 10735141000033116  
40 12529241000033119  
41 12529341000033112  
42 8947041000033115  
43 8947141000033116  
44 12046641000033114  
45 12046741000033117  
46 1752141000033117  
47 2147341000033110  
48 1752241000033112  
49 2147441000033116  
50 2147241000033117  
51 1752341000033119

For peer review only

1  
2 10387141000033115  
3 10387241000033110  
4 12901741000033113  
5 2587541000033118  
6 2587641000033117  
7  
8 11707341000033113  
9 2905641000033115  
10 5140741000033110  
11 8028941000033114  
12 5140541000033119  
13 13743941000033118  
14 13743741000033116  
15 9293241000033114  
16 9293341000033116  
17 12364641000033110  
18 12431141000033117  
19 57441000033114  
20 61441000033113  
21 51841000033118  
22 59941000033110  
23 53241000033116  
24 57541000033110  
25 54441000033118  
26 54341000033112  
27 147941000033113  
28 148041000033111  
29 151141000033115  
30 247441000033117  
31 249841000033112  
32 249941000033116  
33 248241000033117  
34 615441000033115  
35 615341000033114  
36 816741000033113  
37 2105141000033110  
38 993541000033118  
39 992241000033110  
40 993641000033117  
41 993941000033112  
42 1067641000033116  
43 1080341000033111  
44 1080441000033117  
45 1076441000033111  
46 1111341000033112  
47 1258941000033112  
48 1346041000033119  
49 1346141000033115  
50 1346241000033110  
51 1416841000033112  
52 1425741000033118

For peer review only



1  
2 1433241000033113  
3 1433041000033117  
4 1433141000033118  
5 1433341000033115  
6 1429541000033111  
7 1434741000033116  
8 1433541000033110  
9 1432941000033110  
10 1429641000033112  
11 1830241000033110  
12 1436141000033114  
13 1436041000033110  
14 9203041000033115  
15 12468241000033113  
16 1429741000033115  
17 1431441000033113  
18 12666141000033117  
19 12666241000033112  
20 5917241000033112  
21 5917641000033110  
22  
23  
24  
25  
26  
27  
28  
29  
30  
31  
32  
33  
34  
35  
36  
37  
38  
39  
40  
41  
42  
43  
44  
45  
46  
47  
48  
49  
50  
51  
52  
53  
54  
55  
56  
57  
58  
59  
60

For peer review only



1 Fenoterol Hydrobromide Inhaler 100 micrograms/puff  
2 Fenoterol Hydrobromide Solution 5 mg/ml  
3 Fenoterol Hydrobromide With Extension Aerosol inhalation 200 micrograms/puff  
4 Maxivent 2.5mg/2.5ml nebuliser liquid unit dose Steripoule vials (Ashbourne Pharmaceuticals Ltd)  
5 Maxivent 5mg/2.5ml nebuliser liquid unit dose Steripoule vials (Ashbourne Pharmaceuticals Ltd)  
6 Maxivent Inhaler 100 micrograms/puff  
7 Monovent 1.5mg/5ml syrup (Sandoz Ltd)  
8 Monovent Sa Tablets 7.5 mg  
9 Monovent Tablets 5 mg  
10 Novolizer Salbulin Inhalation Cartridge + Device 100 micrograms/dose  
11 Novolizer Salbulin Inhalation Cartridge Refill 100 micrograms/dose  
12 Pirbuterol Capsules 10 mg  
13 Pirbuterol Capsules 15 mg  
14 Pirbuterol Inhaler 200 micrograms/puff  
15 Pirbuterol Syrup 7.5 mg/5 ml  
16 Pulmadil Auto Inhaler 200 micrograms/puff  
17 Pulmadil Inhaler 200 micrograms/puff  
18 Pulmadil Refill 200 micrograms/puff  
19 Pulvinal Salbutamol 200micrograms/dose dry powder inhaler (Chiesi Ltd)  
20 Reproterol Hydrochloride Elixir 10 mg/5 ml  
21 Reproterol Hydrochloride Inhaler 500 micrograms/puff  
22 Reproterol Hydrochloride Respirator solution 10 mg/ml  
23 Reproterol Hydrochloride Tablets 20 mg  
24 Rimiterol Hydrobromide Auto Inhaler 200 micrograms/puff  
25 Rimiterol Hydrobromide Inhaler 200 micrograms/puff  
26 Rimiterol Hydrobromide Refill 200 micrograms/puff  
27 Salamol 100micrograms/dose Easi-Breathe inhaler (Teva UK Ltd)  
28 Salamol 100micrograms/dose inhaler CFC free (Teva UK Ltd)  
29 Salamol 2.5mg/2.5ml nebuliser liquid Steri-Neb unit dose vials (Teva UK Ltd)  
30 Salamol 5mg/2.5ml nebuliser liquid Steri-Neb unit dose vials (Teva UK Ltd)  
31 Salamol Easi-Breathe Breath-actuated inhaler 100 micrograms/puff  
32 Salamol Inhaler 100 micrograms/puff  
33 Salamol Nebuliser solution 2.5 mg/2.5 ml  
34 Salapin 2mg/5ml syrup (Pinewood Healthcare)  
35 Salbulin 100micrograms/dose inhaler (3M Health Care Ltd)  
36 Salbulin Cfc-free inhaler 100 micrograms/puff  
37 Salbulin Liquid 2 mg/5 ml  
38 Salbulin Novolizer 100micrograms/dose inhalation powder (Meda Pharmaceuticals Ltd)  
39 Salbulin Novolizer 100micrograms/dose inhalation powder refill (Meda Pharmaceuticals Ltd)  
40 Salbulin Tablets 2 mg  
41 Salbulin Tablets 4 mg  
42 Salbutamol 100micrograms/dose breath actuated inhaler  
43 Salbutamol 100micrograms/dose breath actuated inhaler CFC free  
44 Salbutamol 100micrograms/dose dry powder inhalation cartridge  
45 Salbutamol 100micrograms/dose dry powder inhalation cartridge with device  
46 Salbutamol 100micrograms/dose dry powder inhaler  
47 Salbutamol 100micrograms/dose inhaler  
48 Salbutamol 100micrograms/dose inhaler CFC free  
49 Salbutamol 100micrograms/dose inhaler CFC free  
50 Salbutamol 2.5mg/2.5ml nebuliser liquid unit dose Steripoule vials (Galen Ltd)  
51 Salbutamol 2.5mg/2.5ml nebuliser liquid unit dose vials

- 1 Salbutamol 200 Cyclocaps (Teva UK Ltd)
- 2 Salbutamol 200microgram inhalation powder blisters
- 3 Salbutamol 200microgram inhalation powder blisters with device
- 4 Salbutamol 200microgram inhalation powder capsules
- 5 Salbutamol 200micrograms/dose dry powder inhaler
- 6 Salbutamol 2mg tablets
- 7 Salbutamol 2mg/5ml oral solution sugar free
- 8 Salbutamol 400 Cyclocaps (Teva UK Ltd)
- 9 Salbutamol 400microgram inhalation powder blisters
- 10 Salbutamol 400microgram inhalation powder blisters with device
- 11 Salbutamol 400microgram inhalation powder capsules
- 12 Salbutamol 4mg modified-release capsules
- 13 Salbutamol 4mg modified-release tablets
- 14 Salbutamol 4mg tablets
- 15 Salbutamol 500micrograms/1ml solution for injection ampoules
- 16 Salbutamol 5mg/2.5ml nebuliser liquid unit dose Steripoule vials (Galen Ltd)
- 17 Salbutamol 5mg/2.5ml nebuliser liquid unit dose vials
- 18 Salbutamol 5mg/5ml solution for infusion ampoules
- 19 Salbutamol 5mg/ml nebuliser liquid
- 20 Salbutamol 8mg modified-release capsules
- 21 Salbutamol 8mg modified-release tablets
- 22 Salbutamol 95micrograms/dose dry powder inhaler
- 23 Salbutamol Accuhaler 200 micrograms/dose
- 24 Salbutamol Aerosol inhalation 100 micrograms/metered inhalation
- 25 Salbutamol Autohaler 100 micrograms/puff
- 26 Salbutamol Breath Actuated Pressurised Inhalation 100 micrograms/actuation
- 27 Salbutamol Breath Actuated Pressurised Inhalation, Cfc-free 100 micrograms/actuation
- 28 Salbutamol Breath-actuated inhaler 95 micrograms/dose
- 29 Salbutamol Cyclocaps 200 micrograms
- 30 Salbutamol Cyclocaps 400 micrograms
- 31 Salbutamol Dry powder breath-actuated inhaler 200 micrograms
- 32 Salbutamol Dry powder breath-actuated inhaler 95 micrograms/dose
- 33 Salbutamol Dry powder disks + disk inhaler 200 micrograms
- 34 Salbutamol Dry powder disks + disk inhaler 400 micrograms
- 35 Salbutamol Dry powder for inhalation 400 micrograms/dose
- 36 Salbutamol Dry Powder Inhaler 200 micrograms/actuation, 200 dose
- 37 Salbutamol Inhaler with vortex generating actuator 100 micrograms/dose
- 38 Salbutamol Injection 50 micrograms/ml
- 39 Salbutamol Insufflator type 4
- 40 Salbutamol Nebules 0.1 %
- 41 Salbutamol Rotacaps 200 micrograms
- 42 Salbutamol Rotacaps 400 micrograms
- 43 Salbutamol Rotahaler 1
- 44 Salbutamol Sf syrup 2 mg/5 ml
- 45 Salbutamol Spacehaler 100 micrograms/puff
- 46 Salbutamol Spandets 8 mg
- 47 Salbutamol Sr Spandet(s) 8 mg
- 48 Salbutamol Syrup 1 mg/5 ml
- 49 Salbutamol Syrup 2 mg/5 ml
- 50 Salbuvent Aerosol inhalation 100mcg/inhalation

1 Salbuvent Injection 500mcg/ml  
2 Salbuvent Injection 50mcg/ml  
3 Salbuvent Injection 50mg/ml  
4 Salbuvent Respirator solution 5mg/ml  
5 Salbuvent Solution for intravenous infusion 1mg/ml  
6 Salbuvent Syrup 2mg/5 ml  
7 Salbuvent Tablets 2 mg  
8 Salbuvent Tablets 4 mg  
9 Terbutaline 1.5mg/5ml oral solution sugar free  
10 Terbutaline 10mg/ml nebuliser liquid  
11 Terbutaline 2.5mg/5ml solution for injection ampoules  
12 Terbutaline 250micrograms/dose inhaler  
13 Terbutaline 250micrograms/dose inhaler with spacer  
14 Terbutaline 500micrograms/1ml solution for injection ampoules  
15 Terbutaline 500micrograms/dose dry powder inhaler  
16 Terbutaline 5mg tablets  
17 Terbutaline 5mg/2ml nebuliser liquid unit dose vials  
18 Terbutaline 7.5mg modified-release tablets  
19 Terbutaline Nebulisation single dose unit 5 mg/2 ml  
20 Terbutaline Respules 5 mg/2 ml  
21 Terbutaline Sulfate Refill canister 250 micrograms/puff  
22 Terbutaline Sulfate Respirator solution 2.5 mg/ml  
23 Terbutaline Sulfate Respules 5 mg/2 ml  
24 Terbutaline Sulfate Turbohaler 500 micrograms/dose  
25 Ventmax SR 4mg capsules (Chiesi Ltd)  
26 Ventmax SR 8mg capsules (Chiesi Ltd)  
27 Ventodisks 200microgram (GlaxoSmithKline UK Ltd)  
28 Ventodisks 200microgram with Diskhaler (GlaxoSmithKline UK Ltd)  
29 Ventodisks 400microgram (GlaxoSmithKline UK Ltd)  
30 Ventodisks 400microgram with Diskhaler (GlaxoSmithKline UK Ltd)  
31 Ventolin 100micrograms/dose Evohaler (GlaxoSmithKline UK Ltd)  
32 Ventolin 2.5mg Nebules (GlaxoSmithKline UK Ltd)  
33 Ventolin 200microgram Rotacaps (GlaxoSmithKline UK Ltd)  
34 Ventolin 200micrograms/dose Accuhaler (GlaxoSmithKline UK Ltd)  
35 Ventolin 2mg/5ml syrup (GlaxoSmithKline UK Ltd)  
36 Ventolin 400microgram Rotacaps (GlaxoSmithKline UK Ltd)  
37 Ventolin 500micrograms/1ml solution for injection ampoules (GlaxoSmithKline UK Ltd)  
38 Ventolin 5mg Nebules (GlaxoSmithKline UK Ltd)  
39 Ventolin 5mg/5ml solution for infusion ampoules (GlaxoSmithKline UK Ltd)  
40 Ventolin 5mg/ml respirator solution (GlaxoSmithKline UK Ltd)  
41 Ventolin Cr S/r tablets 4 mg  
42 Ventolin Cr S/r tablets 8 mg  
43 Ventolin Easi-Breathe Breath-actuated inhaler 100 micrograms/puff  
44 Ventolin Inhaler 100 micrograms/puff  
45 Ventolin Injection 50 micrograms/ml  
46 Ventolin Rotahaler (GlaxoSmithKline UK Ltd)  
47 Ventolin Spandets 8 mg  
48 Ventolin Tablets 2 mg  
49 Ventolin Tablets 4 mg  
50 Volmax 4mg modified-release tablets (GlaxoSmithKline UK Ltd)

1 Volmax 8mg modified-release tablets (GlaxoSmithKline UK Ltd)  
2 Aerocrom inhaler (Castlemead Healthcare Ltd)  
3 Aerocrom Syncroner with spacer (Castlemead Healthcare Ltd)  
4 Atrovent 20micrograms/dose Autohaler (Boehringer Ingelheim Ltd)  
5 Atrovent 20micrograms/dose inhaler (Boehringer Ingelheim Ltd)  
6 Atrovent 20micrograms/dose inhaler CFC free (Boehringer Ingelheim Ltd)  
7 Atrovent 250micrograms/1ml nebuliser liquid UDVs (Boehringer Ingelheim Ltd)  
8 Atrovent 40microgram Aerocaps (Boehringer Ingelheim Ltd)  
9 Atrovent 40microgram Aerocaps with Aerohaler (Boehringer Ingelheim Ltd)  
10 Atrovent 500micrograms/2ml nebuliser liquid UDVs (Boehringer Ingelheim Ltd)  
11 Atrovent Forte 40micrograms/dose inhaler (Boehringer Ingelheim Ltd)  
12 Atrovent Nebules 500mcgs/2 ml  
13 Atrovent Nebuliser solution 250 micrograms/ml  
14 Inhalvent 20micrograms/dose inhaler (Alissa Healthcare Research Ltd)  
15 Ipratropium 250micrograms/1ml nebuliser liquid Steri-Neb unit dose vials (Teva UK Ltd)  
16 Ipratropium 250micrograms/1ml nebuliser liquid unit dose Steripoule vials (Galen Ltd)  
17 Ipratropium 500micrograms/2ml nebuliser liquid Steri-Neb unit dose vials (Teva UK Ltd)  
18 Ipratropium 500micrograms/2ml nebuliser liquid unit dose Steripoule vials (Galen Ltd)  
19 Ipratropium bromide 20micrograms/dose breath actuated inhaler  
20 Ipratropium bromide 20micrograms/dose inhaler  
21 Ipratropium bromide 20micrograms/dose inhaler CFC free  
22 Ipratropium bromide 250micrograms/1ml nebuliser liquid unit dose vials  
23 Ipratropium bromide 40microgram inhalation powder capsules  
24 Ipratropium bromide 40microgram inhalation powder capsules with device  
25 Ipratropium bromide 40micrograms/dose inhaler  
26 Ipratropium bromide 500micrograms/2ml nebuliser liquid unit dose vials  
27 Ipratropium Bromide Nebuliser solution 250 micrograms/ml  
28 Oxitropium bromide 100micrograms/dose inhaler  
29 Oxitropium Bromide Autohaler 100 micrograms/puff  
30 Oxivent 100micrograms/dose Autohaler (Boehringer Ingelheim Ltd)  
31 Oxivent 100micrograms/dose inhaler (Boehringer Ingelheim Ltd)  
32 Respontin 250micrograms/1ml Nebules (GlaxoSmithKline UK Ltd)  
33 Respontin 500micrograms/2ml Nebules (GlaxoSmithKline UK Ltd)  
34 Tropiovent 250micrograms/1ml nebuliser liquid unit dose Steripoule vials (Ashbourne Pharmaceuticals Ltd)  
35 Tropiovent 500micrograms/2ml nebuliser liquid unit dose Steripoule vials (Ashbourne Pharmaceuticals Ltd)  
36 Ipravent 20micrograms/dose inhaler CFC free (Cipla EU Ltd)  
37 Combivent inhaler (Boehringer Ingelheim Ltd)  
38 Combivent nebuliser liquid 2.5ml UDVs (Boehringer Ingelheim Ltd)  
39 Combivent Nebuliser solution  
40 Duovent Autohaler (Boehringer Ingelheim Ltd)  
41 Duovent inhaler (Boehringer Ingelheim Ltd)  
42 Duovent UDVs nebuliser liquid 4ml (Boehringer Ingelheim Ltd)  
43 Fenoterol 1.25mg/4ml / Ipratropium 500micrograms/4ml nebuliser liquid unit dose vials  
44 Fenoterol 100micrograms/dose / Ipratropium 40micrograms/dose inhaler  
45 Ipramol nebuliser solution 2.5ml Steri-Neb unit dose vials (Teva UK Ltd)  
46 Salbutamol 100micrograms/dose / Ipratropium 20micrograms/dose inhaler  
47 Salbutamol 2.5mg/2.5ml / Ipratropium bromide 500micrograms/2.5ml nebuliser liquid ampoules  
48 Salbutamol 2.5mg/2.5ml / Ipratropium bromide 500micrograms/2.5ml nebuliser liquid unit dose vials  
49 Salipraneb 0.5mg/2.5mg nebuliser solution 2.5ml ampoules (Actavis UK Ltd)  
50 Combiprasal 0.5mg/2.5mg nebuliser solution 2.5ml unit dose vials (TriOn Pharma Ltd)



1 Asmanex Twisthaler Dry Powder Inhaler 200 micrograms/dose, 30 doses  
2 Asmanex Twisthaler Dry Powder Inhaler 200 micrograms/dose, 60 doses  
3 Asmanex Twisthaler Dry Powder Inhaler 400 micrograms/dose, 30 doses  
4 Asmanex Twisthaler Dry Powder Inhaler 400 micrograms/dose, 60 doses  
5 Bdp Spacehaler 100 micrograms/puff  
6 Bdp Spacehaler 250 micrograms/puff  
7 Bdp Spacehaler 50 micrograms/puff  
8 Beclazone 100 Easi-Breathe inhaler (Teva UK Ltd)  
9 Beclazone 100 inhaler (Teva UK Ltd)  
10 Beclazone 200 inhaler (Teva UK Ltd)  
11 Beclazone 250 Easi-Breathe inhaler (Teva UK Ltd)  
12 Beclazone 250 inhaler (Teva UK Ltd)  
13 Beclazone 50 Easi-Breathe inhaler (Teva UK Ltd)  
14 Beclazone 50 inhaler (Teva UK Ltd)  
15 Becloforte 250micrograms/dose inhaler (GlaxoSmithKline UK Ltd)  
16 Becloforte 400microgram disks (GlaxoSmithKline UK Ltd)  
17 Becloforte 400microgram disks with Diskhaler (GlaxoSmithKline UK Ltd)  
18 Becloforte Easi-Breathe Breath-actuated inhaler 250 micrograms/puff  
19 Becloforte Integra Inhaler with spacer device 250 micrograms/puff  
20 Becloforte Integra Refill 250 micrograms/puff  
21 Becloforte Vm Inhalers and volumatic 250 micrograms/puff  
22 Beclometasone 100 Cyclocaps (Teva UK Ltd)  
23 Beclometasone 100microgram inhalation powder blisters  
24 Beclometasone 100microgram inhalation powder blisters with device  
25 Beclometasone 100microgram inhalation powder capsules  
26 Beclometasone 100micrograms/dose breath actuated inhaler  
27 Beclometasone 100micrograms/dose breath actuated inhaler CFC free  
28 Beclometasone 100micrograms/dose dry powder inhaler  
29 Beclometasone 100micrograms/dose inhaler  
30 Beclometasone 100micrograms/dose inhaler CFC free  
31 Beclometasone 200 Cyclocaps (Teva UK Ltd)  
32 Beclometasone 200microgram inhalation powder blisters  
33 Beclometasone 200microgram inhalation powder blisters with device  
34 Beclometasone 200microgram inhalation powder capsules  
35 Beclometasone 200micrograms/dose dry powder inhaler  
36 Beclometasone 200micrograms/dose inhaler  
37 Beclometasone 200micrograms/dose inhaler CFC free  
38 Beclometasone 250micrograms/dose breath actuated inhaler  
39 Beclometasone 250micrograms/dose dry powder inhaler  
40 Beclometasone 250micrograms/dose inhaler  
41 Beclometasone 250micrograms/dose inhaler CFC free  
42 Beclometasone 400 Cyclocaps (Teva UK Ltd)  
43 Beclometasone 400microgram inhalation powder blisters  
44 Beclometasone 400microgram inhalation powder blisters with device  
45 Beclometasone 400microgram inhalation powder capsules  
46 Beclometasone 400micrograms/dose dry powder inhaler  
47 Beclometasone 50micrograms/dose breath actuated inhaler  
48 Beclometasone 50micrograms/dose breath actuated inhaler CFC free  
49 Beclometasone 50micrograms/dose dry powder inhaler  
50 Beclometasone 50micrograms/dose inhaler

1 Beclomethasone 50micrograms/dose inhaler CFC free  
2 Beclomethasone Dipropionate Aqueous nasal spray 50 micrograms/dose  
3 Beclomethasone Dipropionate Autohaler 250 micrograms/puff  
4 Beclomethasone Dipropionate Autohaler 50 micrograms/puff  
5 Beclomethasone Dipropionate Breath Actuated Pressurised Inhalation 100 micrograms/actuation  
6 Beclomethasone Dipropionate Breath Actuated Pressurised Inhalation 250 micrograms/actuation  
7 Beclomethasone Dipropionate Breath Actuated Pressurised Inhalation 50 micrograms/actuation  
8 Beclomethasone Dipropionate Breath Actuated Pressurised Inhalation, Cfc-free 100 micrograms/actuation  
9 Beclomethasone Dipropionate Breath Actuated Pressurised Inhalation, Cfc-free 50 micrograms/actuation  
10 Beclomethasone Dipropionate Breath-actuated aerosol inhaler 100 micrograms  
11 Beclomethasone Dipropionate Breath-actuated aerosol inhaler 250 micrograms  
12 Beclomethasone Dipropionate Breath-actuated aerosol inhaler 50 micrograms  
13 Beclomethasone Dipropionate Breath-actuated inhaler 100 micrograms/puff  
14 Beclomethasone Dipropionate Breath-actuated inhaler 250 micrograms/puff  
15 Beclomethasone Dipropionate Breath-actuated inhaler 50 micrograms/puff  
16 Beclomethasone Dipropionate Disks with diskhaler 100 micrograms/dose  
17 Beclomethasone Dipropionate Disks with diskhaler 200 micrograms/dose  
18 Beclomethasone Dipropionate Disks with diskhaler 400 micrograms/dose  
19 Beclomethasone Dipropionate Dry powder breath-actuated inhaler 100 micrograms/dose  
20 Beclomethasone Dipropionate Dry powder breath-actuated inhaler 250 micrograms/dose  
21 Beclomethasone Dipropionate Dry powder breath-actuated inhaler 50 micrograms/dose  
22 Beclomethasone Dipropionate Dry powder capsules for inhalation 100 micrograms  
23 Beclomethasone Dipropionate Dry powder capsules for inhalation 200 micrograms  
24 Beclomethasone Dipropionate Dry powder capsules for inhalation 400 micrograms  
25 Beclomethasone Dipropionate Dry powder disks + disk inhaler 100 micrograms  
26 Beclomethasone Dipropionate Dry powder disks + disk inhaler 200 micrograms  
27 Beclomethasone Dipropionate Dry powder disks + disk inhaler 400 micrograms  
28 Beclomethasone Dipropionate Dry powder for inhalation 100 micrograms/metered actuation  
29 Beclomethasone Dipropionate Dry powder for inhalation 250 micrograms/metered actuation  
30 Beclomethasone Dipropionate Dry powder for inhalation 50 micrograms/metered actuation  
31 Beclomethasone Dipropionate Dry Powder Inhaler 100 micrograms/metered dose  
32 Beclomethasone Dipropionate Dry Powder Inhaler 200 micrograms/metered dose  
33 Beclomethasone Dipropionate Dry Powder Inhaler 400 micrograms/metered dose  
34 Beclomethasone Dipropionate Inhaler 100 micrograms/puff  
35 Beclomethasone Dipropionate Inhaler 200 micrograms/puff  
36 Beclomethasone Dipropionate Inhaler 250 micrograms/puff  
37 Beclomethasone Dipropionate Inhaler 50 micrograms/puff  
38 Beclomethasone Dipropionate Inhaler with spacer device 250 micrograms/puff  
39 Beclomethasone Dipropionate Inhaler with vortex generating actuator 100 micrograms/dose  
40 Beclomethasone Dipropionate Inhaler with vortex generating actuator 250 micrograms/dose  
41 Beclomethasone Dipropionate Inhaler with vortex generating actuator 50 micrograms/dose  
42 Beclomethasone Dipropionate Insufflator type 4  
43 Beclomethasone Dipropionate Pressurised Inhalation, Cfc-free 100 micrograms/actuation  
44 Beclomethasone Dipropionate Pressurised Inhalation, Cfc-free 50 micrograms/actuation  
45 Beclomethasone Dipropionate Refill 250 micrograms/puff  
46 Beclomethasone Dipropionate Refill disks 100 micrograms/dose  
47 Beclomethasone Dipropionate Refill disks 200 micrograms/dose  
48 Beclomethasone Dipropionate Refill disks 400 micrograms/dose  
49 Beclomethasone Dipropionate Rotacaps 100 micrograms  
50 Beclomethasone Dipropionate Rotacaps 200 micrograms



1 Beclomethasone Dipropionate Rotacaps 400 micrograms  
2 Beclomethasone Dipropionate Spacehaler 100 micrograms/puff  
3 Beclomethasone Dipropionate Spacehaler 250 micrograms/puff  
4 Beclomethasone Dipropionate Spacehaler 50 micrograms/puff  
5 Beclomethasone Dipropionate Suspension 50 micrograms/ml  
6 Beclomethasone Rotahaler  
7  
8 Becodisks 100microgram (GlaxoSmithKline UK Ltd)  
9 Becodisks 100microgram with Diskhaler (GlaxoSmithKline UK Ltd)  
10 Becodisks 200microgram (GlaxoSmithKline UK Ltd)  
11 Becodisks 200microgram with Diskhaler (GlaxoSmithKline UK Ltd)  
12 Becodisks 400microgram (GlaxoSmithKline UK Ltd)  
13 Becodisks 400microgram with Diskhaler (GlaxoSmithKline UK Ltd)  
14 Becodisks Refill Powder 400 micrograms  
15 Becodisks With Diskhaler Powder 400 micrograms  
16 Becotide 100 Easi-Breathe Breath-actuated inhaler 100 micrograms/puff  
17 Becotide 100 inhaler (GlaxoSmithKline UK Ltd)  
18 Becotide 100microgram Rotacaps (GlaxoSmithKline UK Ltd)  
19 Becotide 200 inhaler (GlaxoSmithKline UK Ltd)  
20 Becotide 200microgram Rotacaps (GlaxoSmithKline UK Ltd)  
21 Becotide 400microgram Rotacaps (GlaxoSmithKline UK Ltd)  
22 Becotide 50 Easi-Breathe Breath-actuated inhaler 50 micrograms/puff  
23 Becotide 50 inhaler (GlaxoSmithKline UK Ltd)  
24 Becotide Rotahaler (GlaxoSmithKline UK Ltd)  
25 Becotide Suspension 50 micrograms/ml  
26 Betamethasone Valerate Aerosol inhalation 100 micrograms/metered inhalation  
27 Bextasol Aerosol inhalation 100 micrograms/metered inhalation  
28 Budelin Novolizer 200micrograms/dose inhalation powder (Meda Pharmaceuticals Ltd)  
29 Budelin Novolizer 200micrograms/dose inhalation powder refill (Meda Pharmaceuticals Ltd)  
30 Budesonide 100micrograms/dose dry powder inhaler  
31 Budesonide 100micrograms/dose inhaler CFC free  
32 Budesonide 1mg/2ml nebuliser liquid unit dose vials  
33 Budesonide 200 Cyclocaps (Teva UK Ltd)  
34 Budesonide 200microgram inhalation powder capsules  
35 Budesonide 200micrograms/dose dry powder inhalation cartridge  
36 Budesonide 200micrograms/dose dry powder inhalation cartridge with device  
37 Budesonide 200micrograms/dose dry powder inhaler  
38 Budesonide 200micrograms/dose inhaler  
39 Budesonide 200micrograms/dose inhaler CFC free  
40 Budesonide 400 Cyclocaps (Teva UK Ltd)  
41 Budesonide 400microgram inhalation powder capsules  
42 Budesonide 400micrograms/dose dry powder inhaler  
43 Budesonide 500micrograms/2ml nebuliser liquid unit dose vials  
44 Budesonide 50micrograms/dose inhaler  
45 Budesonide Breath-Actuated Dry Powder Inhaler 100 micrograms/dose  
46 Budesonide Breath-Actuated Dry Powder Inhaler 200 micrograms/dose  
47 Budesonide Breath-Actuated Dry Powder Inhaler 400 micrograms/dose  
48 Budesonide Inhaler with spacer device 200 micrograms/dose  
49 Budesonide Refill canister 200 micrograms/dose  
50 Budesonide Refill canister 50 micrograms/dose  
51 Budesonide Respules 1 mg/2 ml single dose unit

1 Budesonide Respules 500 micrograms/2 ml single dose unit  
2 Budesonide Spacer inhaler 200 micrograms/dose  
3 Budesonide Spacer inhaler 50 micrograms/dose  
4 Budesonide Turbohaler 100 micrograms/dose  
5 Budesonide Turbohaler 200 micrograms/dose  
6 Budesonide Turbohaler 400 micrograms/dose  
7 Ciclesonide 160micrograms/dose inhaler CFC free  
8 Ciclesonide 80micrograms/dose inhaler CFC free  
9 Ciclesonide Cfc-free inhaler 160 micrograms/actuation, 120 doses  
10 Ciclesonide Cfc-free inhaler 160 micrograms/actuation, 60 doses  
11 Clenil Modulite 100micrograms/dose inhaler (Chiesi Ltd)  
12 Clenil Modulite 200micrograms/dose inhaler (Chiesi Ltd)  
13 Clenil Modulite 250micrograms/dose inhaler (Chiesi Ltd)  
14 Clenil Modulite 50micrograms/dose inhaler (Chiesi Ltd)  
15 Easyhaler Beclometasone 200micrograms/dose dry powder inhaler (Orion Pharma (UK) Ltd)  
16 Easyhaler Budesonide 100micrograms/dose dry powder inhaler (Orion Pharma (UK) Ltd)  
17 Easyhaler Budesonide 200micrograms/dose dry powder inhaler (Orion Pharma (UK) Ltd)  
18 Easyhaler Budesonide 400micrograms/dose dry powder inhaler (Orion Pharma (UK) Ltd)  
19 Filair 100 inhaler (Meda Pharmaceuticals Ltd)  
20 Filair 50 inhaler (Meda Pharmaceuticals Ltd)  
21 Filair Forte 250micrograms/dose inhaler (Meda Pharmaceuticals Ltd)  
22 Flixotide 0.5mg/2ml Nebules (GlaxoSmithKline UK Ltd)  
23 Flixotide 100microgram disks (GlaxoSmithKline UK Ltd)  
24 Flixotide 100microgram disks with Diskhaler (GlaxoSmithKline UK Ltd)  
25 Flixotide 100micrograms/dose Accuhaler (GlaxoSmithKline UK Ltd)  
26 Flixotide 125micrograms/dose Evohaler (GlaxoSmithKline UK Ltd)  
27 Flixotide 250microgram disks (GlaxoSmithKline UK Ltd)  
28 Flixotide 250microgram disks with Diskhaler (GlaxoSmithKline UK Ltd)  
29 Flixotide 250micrograms/dose Accuhaler (GlaxoSmithKline UK Ltd)  
30 Flixotide 250micrograms/dose Evohaler (GlaxoSmithKline UK Ltd)  
31 Flixotide 25micrograms/dose inhaler (GlaxoSmithKline UK Ltd)  
32 Flixotide 2mg/2ml Nebules (GlaxoSmithKline UK Ltd)  
33 Flixotide 500microgram disks (GlaxoSmithKline UK Ltd)  
34 Flixotide 500microgram disks with Diskhaler (GlaxoSmithKline UK Ltd)  
35 Flixotide 500micrograms/dose Accuhaler (GlaxoSmithKline UK Ltd)  
36 Flixotide 50microgram disks (GlaxoSmithKline UK Ltd)  
37 Flixotide 50microgram disks with Diskhaler (GlaxoSmithKline UK Ltd)  
38 Flixotide 50micrograms/dose Accuhaler (GlaxoSmithKline UK Ltd)  
39 Flixotide 50micrograms/dose Evohaler (GlaxoSmithKline UK Ltd)  
40 Flixotide Inhaler 125 micrograms/puff  
41 Flixotide Inhaler 250 micrograms/puff  
42 Flixotide Inhaler 50 micrograms/puff  
43 Fluticasone 125micrograms/dose inhaler CFC free  
44 Fluticasone 250micrograms/dose inhaler CFC free  
45 Fluticasone 25micrograms/dose inhaler  
46 Fluticasone 2mg/2ml nebuliser liquid unit dose vials  
47 Fluticasone 500micrograms/2ml nebuliser liquid unit dose vials  
48 Fluticasone 50micrograms/dose inhaler CFC free  
49 Fluticasone propionate 100microgram inhalation powder blisters  
50 Fluticasone propionate 100microgram inhalation powder blisters with device

1 Fluticasone propionate 100micrograms/dose dry powder inhaler  
2 Fluticasone propionate 250microgram inhalation powder blisters  
3 Fluticasone propionate 250microgram inhalation powder blisters with device  
4 Fluticasone propionate 250micrograms/dose dry powder inhaler  
5 Fluticasone propionate 500microgram inhalation powder blisters  
6 Fluticasone propionate 500microgram inhalation powder blisters with device  
7 Fluticasone propionate 500micrograms/dose dry powder inhaler  
8 Fluticasone propionate 50microgram inhalation powder blisters  
9 Fluticasone propionate 50microgram inhalation powder blisters with device  
10 Fluticasone propionate 50micrograms/dose dry powder inhaler  
11 Fluticasone Propionate Accuhaler 100 micrograms/dose  
12 Fluticasone Propionate Accuhaler 250 micrograms/dose  
13 Fluticasone Propionate Accuhaler 50 micrograms/dose  
14 Fluticasone Propionate Accuhaler 500 micrograms/dose  
15 Fluticasone Propionate Disks with diskhaler 100 micrograms/dose  
16 Fluticasone Propionate Disks with diskhaler 250 micrograms/dose  
17 Fluticasone Propionate Disks with diskhaler 50 micrograms/dose  
18 Fluticasone Propionate Disks with diskhaler 500 micrograms/puff  
19 Fluticasone Propionate Inhaler 125 micrograms/puff  
20 Fluticasone Propionate Inhaler 250 micrograms/puff  
21 Fluticasone Propionate Inhaler 50 micrograms/puff  
22 Kelhale 100micrograms/dose inhaler (Cipla EU Ltd)  
23 Kelhale 50micrograms/dose inhaler (Cipla EU Ltd)  
24 Mometasone 200micrograms/dose dry powder inhaler  
25 Mometasone 400micrograms/dose dry powder inhaler  
26 Mometasone Furoate Dry Powder Inhaler 200 micrograms/dose, 30 doses  
27 Mometasone Furoate Dry Powder Inhaler 200 micrograms/dose, 60 doses  
28 Mometasone Furoate Dry Powder Inhaler 400 micrograms/dose, 30 doses  
29 Mometasone Furoate Dry Powder Inhaler 400 micrograms/dose, 60 doses  
30 Novolizer Budesonide Inhalation Cartridge + Device 200 micrograms/dose, 100 doses  
31 Novolizer Budesonide Inhalation Cartridge Refill 200 micrograms/dose, 100 doses  
32 Pulmicort 0.5mg Respules (AstraZeneca UK Ltd)  
33 Pulmicort 100 Turbohaler (AstraZeneca UK Ltd)  
34 Pulmicort 100micrograms/dose inhaler CFC free (AstraZeneca UK Ltd)  
35 Pulmicort 1mg Respules (AstraZeneca UK Ltd)  
36 Pulmicort 200 Turbohaler (AstraZeneca UK Ltd)  
37 Pulmicort 200micrograms/dose inhaler (AstraZeneca UK Ltd)  
38 Pulmicort 200micrograms/dose inhaler CFC free (AstraZeneca UK Ltd)  
39 Pulmicort 200micrograms/dose inhaler with Nebuchamber (AstraZeneca UK Ltd)  
40 Pulmicort 400 Turbohaler (AstraZeneca UK Ltd)  
41 Pulmicort LS 50micrograms/dose inhaler (AstraZeneca UK Ltd)  
42 Pulmicort Ls Refill canister 50 micrograms/dose  
43 Pulmicort Refill canister 200 micrograms/dose  
44 Pulmicort Spacer inhaler 200 micrograms/dose  
45 Pulmicort Spacer inhaler 50 micrograms/dose  
46 Pulmicort Turbohaler Breath-Actuated Dry Powder Inhaler 100 micrograms/dose  
47 Pulmicort Turbohaler Breath-Actuated Dry Powder Inhaler 200 micrograms/dose  
48 Pulmicort Turbohaler Breath-Actuated Dry Powder Inhaler 400 micrograms/dose  
49 Pulvinal Beclometasone Dipropionate 100micrograms/dose dry powder inhaler (Chiesi Ltd)  
50 Pulvinal Beclometasone Dipropionate 200micrograms/dose dry powder inhaler (Chiesi Ltd)

1 Pulvinal Beclometasone Dipropionate 400micrograms/dose dry powder inhaler (Chiesi Ltd)  
2 Qvar 100 Autohaler (Teva UK Ltd)  
3 Qvar 100 inhaler (Teva UK Ltd)  
4 Qvar 100micrograms/dose Easi-Breathe inhaler (Teva UK Ltd)  
5 Qvar 50 Autohaler (Teva UK Ltd)  
6 Qvar 50 inhaler (Teva UK Ltd)  
7 Qvar 50micrograms/dose Easi-Breathe inhaler (Teva UK Ltd)  
8 Soprobec 100micrograms/dose inhaler (Glenmark Pharmaceuticals Europe Ltd)  
9 Soprobec 200micrograms/dose inhaler (Glenmark Pharmaceuticals Europe Ltd)  
10 Soprobec 250micrograms/dose inhaler (Glenmark Pharmaceuticals Europe Ltd)  
11 Soprobec 50micrograms/dose inhaler (Glenmark Pharmaceuticals Europe Ltd)  
12 Fluticasone 500micrograms/2ml nebuliser liquid unit dose vials (Imported)  
13 Fluticasone 2mg/2ml nebuliser liquid unit dose vials (Imported)  
14 Ventide inhaler (GlaxoSmithKline UK Ltd)  
15 Ventide Paediatric Rotacaps (GlaxoSmithKline UK Ltd)  
16 Ventide Rotacaps (GlaxoSmithKline UK Ltd)  
17 Atimos Modulite 12micrograms/dose inhaler (Chiesi Ltd)  
18 Eformoterol Fumarate Breath-actuated inhaler 12 micrograms/dose  
19 Eformoterol Fumarate Breath-actuated inhaler 6 micrograms/dose  
20 Eformoterol Fumarate Dry powder for inhalation with inhaler device 12 micrograms  
21 Foradil 12microgram inhalation powder capsules with device (Novartis Pharmaceuticals UK Ltd)  
22 Formoterol 12microgram inhalation powder capsules with device  
23 Formoterol 12micrograms/dose dry powder inhaler  
24 Formoterol 12micrograms/dose inhaler CFC free  
25 Formoterol 6micrograms/dose dry powder inhaler  
26 Formoterol Dry Powder Inhaler 12 micrograms/actuation, 120 dose  
27 Formoterol Dry Powder Inhaler 12 micrograms/actuation, 60 dose  
28 Formoterol Easyhaler 12micrograms/dose dry powder inhaler (Orion Pharma (UK) Ltd)  
29 Indacaterol 150microgram inhalation powder capsules with device  
30 Indacaterol 300microgram inhalation powder capsules with device  
31 Neovent 25micrograms/dose inhaler CFC free (Kent Pharmaceuticals Ltd)  
32 Olodaterol 2.5micrograms/dose solution for inhalation cartridge with device CFC free  
33 Onbrez Breezhaler 150microgram inhalation powder capsules with device (Novartis Pharmaceuticals UK Ltd)  
34 Onbrez Breezhaler 300microgram inhalation powder capsules with device (Novartis Pharmaceuticals UK Ltd)  
35 Oxis 12 Turbohaler (AstraZeneca UK Ltd)  
36 Oxis 6 Turbohaler (AstraZeneca UK Ltd)  
37 Oxis Turbohaler 4.5 micrograms/dose  
38 Oxis Turbohaler 9 micrograms/dose  
39 Salmeterol 25micrograms/dose inhaler  
40 Salmeterol 25micrograms/dose inhaler CFC free  
41 Salmeterol 50microgram inhalation powder blisters  
42 Salmeterol 50microgram inhalation powder blisters with device  
43 Salmeterol 50micrograms/dose dry powder inhaler  
44 Salmeterol Xinafoate Accuhaler 50 micrograms/dose  
45 Salmeterol Xinafoate Disks with diskhaler 50 micrograms/blister  
46 Serevent 25micrograms/dose Evohaler (GlaxoSmithKline UK Ltd)  
47 Serevent 25micrograms/dose inhaler (GlaxoSmithKline UK Ltd)  
48 Serevent 50microgram disks (GlaxoSmithKline UK Ltd)  
49 Serevent 50microgram disks with Diskhaler (GlaxoSmithKline UK Ltd)  
50 Serevent 50micrograms/dose Accuhaler (GlaxoSmithKline UK Ltd)

1 Soltel 25micrograms/dose inhaler CFC free (Kent Pharmaceuticals Ltd)  
2  
3 Striverdi Respimat 2.5micrograms/dose solution for inhalation cartridge with device (Boehringer Ingelheim Ltc  
4 Vertine 25micrograms/dose inhaler CFC free (Teva UK Ltd)  
5 Striverdi Respimat 2.5micrograms/dose inhalation solution refill cartridge (Boehringer Ingelheim Ltd)  
6 Olodaterol 2.5micrograms/dose inhalation solution cartridge CFC free  
7  
8 Atimos Modulite 12micrograms/dose inhaler (Chiesi Ltd)  
9 Eformoterol Fumarate Breath-actuated inhaler 12 micrograms/dose  
10 Eformoterol Fumarate Breath-actuated inhaler 6 micrograms/dose  
11 Eformoterol Fumarate Dry powder for inhalation with inhaler device 12 micrograms  
12 Foradil 12microgram inhalation powder capsules with device (Novartis Pharmaceuticals UK Ltd)  
13 Formoterol 12microgram inhalation powder capsules with device  
14 Formoterol 12micrograms/dose dry powder inhaler  
15 Formoterol 12micrograms/dose inhaler CFC free  
16 Formoterol 6micrograms/dose dry powder inhaler  
17 Formoterol Dry Powder Inhaler 12 micrograms/actuation, 120 dose  
18 Formoterol Dry Powder Inhaler 12 micrograms/actuation, 60 dose  
19 Formoterol Easyhaler 12micrograms/dose dry powder inhaler (Orion Pharma (UK) Ltd)  
20 Indacaterol 150microgram inhalation powder capsules with device  
21 Indacaterol 300microgram inhalation powder capsules with device  
22 Neovent 25micrograms/dose inhaler CFC free (Kent Pharmaceuticals Ltd)  
23 Olodaterol 2.5micrograms/dose solution for inhalation cartridge with device CFC free  
24 Onbrez Breezhaler 150microgram inhalation powder capsules with device (Novartis Pharmaceuticals UK Ltd)  
25 Onbrez Breezhaler 300microgram inhalation powder capsules with device (Novartis Pharmaceuticals UK Ltd)  
26 Oxis 12 Turbohaler (AstraZeneca UK Ltd)  
27 Oxis 6 Turbohaler (AstraZeneca UK Ltd)  
28 Oxis Turbuhaler 4.5 micrograms/dose  
29 Oxis Turbuhaler 9 micrograms/dose  
30 Salmeterol 25micrograms/dose inhaler  
31 Salmeterol 25micrograms/dose inhaler CFC free  
32 Salmeterol 50microgram inhalation powder blisters  
33 Salmeterol 50microgram inhalation powder blisters with device  
34 Salmeterol 50micrograms/dose dry powder inhaler  
35 Salmeterol Xinafoate Accuhaler 50 micrograms/dose  
36 Salmeterol Xinafoate Disks with diskhaler 50 micrograms/blister  
37 Serevent 25micrograms/dose Evohaler (GlaxoSmithKline UK Ltd)  
38 Serevent 25micrograms/dose inhaler (GlaxoSmithKline UK Ltd)  
39 Serevent 50microgram disks (GlaxoSmithKline UK Ltd)  
40 Serevent 50microgram disks with Diskhaler (GlaxoSmithKline UK Ltd)  
41 Serevent 50micrograms/dose Accuhaler (GlaxoSmithKline UK Ltd)  
42 Soltel 25micrograms/dose inhaler CFC free (Kent Pharmaceuticals Ltd)  
43 Striverdi Respimat 2.5micrograms/dose solution for inhalation cartridge with device (Boehringer Ingelheim Ltc  
44 Vertine 25micrograms/dose inhaler CFC free (Teva UK Ltd)  
45 Striverdi Respimat 2.5micrograms/dose inhalation solution refill cartridge (Boehringer Ingelheim Ltd)  
46 Olodaterol 2.5micrograms/dose inhalation solution cartridge CFC free  
47 Aerivio Spiromax 50micrograms/dose / 500micrograms/dose dry powder inhaler (Teva UK Ltd)  
48 AirFluSal 25micrograms/dose / 125micrograms/dose inhaler (Sandoz Ltd)  
49 AirFluSal 25micrograms/dose / 250micrograms/dose inhaler (Sandoz Ltd)  
50 AirFluSal Forspiro 50micrograms/dose / 500micrograms/dose dry powder inhaler (Sandoz Ltd)  
51 Aloflute 25micrograms/dose / 125micrograms/dose inhaler (Mylan)  
52 Aloflute 25micrograms/dose / 250micrograms/dose inhaler (Mylan)



1 Beclometasone 100micrograms/dose / Formoterol 6micrograms/dose dry powder inhaler  
2 Beclometasone 100micrograms/dose / Formoterol 6micrograms/dose inhaler CFC free  
3 Beclometasone 200micrograms/dose / Formoterol 6micrograms/dose dry powder inhaler  
4 Beclometasone 200micrograms/dose / Formoterol 6micrograms/dose inhaler CFC free  
5 Budesonide 100micrograms/dose / Formoterol 6micrograms/dose dry powder inhaler  
6 Budesonide 200micrograms/dose / Formoterol 6micrograms/dose dry powder inhaler  
7 Budesonide 200micrograms/dose / Formoterol 6micrograms/dose inhaler CFC free  
8 Budesonide 400micrograms/dose / Formoterol 12micrograms/dose dry powder inhaler  
9 Combisal 25micrograms/dose / 125micrograms/dose inhaler (Aspire Pharma Ltd)  
10 Combisal 25micrograms/dose / 250micrograms/dose inhaler (Aspire Pharma Ltd)  
11 Combisal 25micrograms/dose / 50micrograms/dose inhaler (Aspire Pharma Ltd)  
12 DuoResp Spiromax 160micrograms/dose / 4.5micrograms/dose dry powder inhaler (Teva UK Ltd)  
13 DuoResp Spiromax 320micrograms/dose / 9micrograms/dose dry powder inhaler (Teva UK Ltd)  
14 Fluticasone 125micrograms/dose / Formoterol 5micrograms/dose breath actuated inhaler CFC free  
15 Fluticasone 125micrograms/dose / Formoterol 5micrograms/dose inhaler CFC free  
16 Fluticasone 125micrograms/dose / Salmeterol 25micrograms/dose inhaler CFC free  
17 Fluticasone 250micrograms/dose / Formoterol 10micrograms/dose inhaler CFC free  
18 Fluticasone 250micrograms/dose / Salmeterol 25micrograms/dose inhaler CFC free  
19 Fluticasone 50micrograms/dose / Formoterol 5micrograms/dose breath actuated inhaler CFC free  
20 Fluticasone 50micrograms/dose / Formoterol 5micrograms/dose inhaler CFC free  
21 Fluticasone 50micrograms/dose / Salmeterol 25micrograms/dose inhaler CFC free  
22 Fluticasone furoate 184micrograms/dose / Vilanterol 22micrograms/dose dry powder inhaler  
23 Fluticasone furoate 92micrograms/dose / Vilanterol 22micrograms/dose dry powder inhaler  
24 Fluticasone propionate 100micrograms/dose / Salmeterol 50micrograms/dose dry powder inhaler  
25 Fluticasone propionate 250micrograms/dose / Salmeterol 50micrograms/dose dry powder inhaler  
26 Fluticasone propionate 500micrograms/dose / Salmeterol 50micrograms/dose dry powder inhaler  
27 Flutiform 125micrograms/dose / 5micrograms/dose inhaler (Napp Pharmaceuticals Ltd)  
28 Flutiform 250micrograms/dose / 10micrograms/dose inhaler (Napp Pharmaceuticals Ltd)  
29 Flutiform 50micrograms/dose / 5micrograms/dose inhaler (Napp Pharmaceuticals Ltd)  
30 Flutiform K-haler 125micrograms/dose / 5micrograms/dose breath actuated inhaler (Napp Pharmaceuticals Ltd)  
31 Flutiform K-haler 50micrograms/dose / 5micrograms/dose breath actuated inhaler (Napp Pharmaceuticals Ltd)  
32 Fobumix Easyhaler 160micrograms/dose / 4.5micrograms/dose dry powder inhaler (Orion Pharma (UK) Ltd)  
33 Fobumix Easyhaler 320micrograms/dose / 9micrograms/dose dry powder inhaler (Orion Pharma (UK) Ltd)  
34 Fobumix Easyhaler 80micrograms/dose / 4.5micrograms/dose dry powder inhaler (Orion Pharma (UK) Ltd)  
35 Fostair 100micrograms/dose / 6micrograms/dose inhaler (Chiesi Ltd)  
36 Fostair 200micrograms/dose / 6micrograms/dose inhaler (Chiesi Ltd)  
37 Fostair NEXThaler 100micrograms/dose / 6micrograms/dose dry powder inhaler (Chiesi Ltd)  
38 Fostair NEXThaler 200micrograms/dose / 6micrograms/dose dry powder inhaler (Chiesi Ltd)  
39 Fusacomb Easyhaler 50micrograms/dose / 250micrograms/dose dry powder inhaler (Orion Pharma (UK) Ltd)  
40 Fusacomb Easyhaler 50micrograms/dose / 500micrograms/dose dry powder inhaler (Orion Pharma (UK) Ltd)  
41 Relvar Ellipta 184micrograms/dose / 22micrograms/dose dry powder inhaler (GlaxoSmithKline UK Ltd)  
42 Relvar Ellipta 92micrograms/dose / 22micrograms/dose dry powder inhaler (GlaxoSmithKline UK Ltd)  
43 Sereflo 25micrograms/dose / 125micrograms/dose inhaler (Cipla EU Ltd)  
44 Sereflo 25micrograms/dose / 250micrograms/dose inhaler (Cipla EU Ltd)  
45 Seretide 100 Accuhaler (GlaxoSmithKline UK Ltd)  
46 Seretide 125 Evohaler (GlaxoSmithKline UK Ltd)  
47 Seretide 250 Accuhaler (GlaxoSmithKline UK Ltd)  
48 Seretide 250 Evohaler (GlaxoSmithKline UK Ltd)  
49 Seretide 50 Evohaler (GlaxoSmithKline UK Ltd)  
50 Seretide 500 Accuhaler (GlaxoSmithKline UK Ltd)

1 Sirdupla 25micrograms/dose / 125micrograms/dose inhaler (Mylan)  
2 Sirdupla 25micrograms/dose / 250micrograms/dose inhaler (Mylan)  
3 Stalplex 50micrograms/dose / 500micrograms/dose dry powder inhaler (Glenmark Pharmaceuticals Europe Ltc)  
4 Symbicort 100/6 Turbohaler (AstraZeneca UK Ltd)  
5 Symbicort 200/6 Turbohaler (AstraZeneca UK Ltd)  
6 Symbicort 200micrograms/dose / 6micrograms/dose pressurised inhaler (AstraZeneca UK Ltd)  
7 Symbicort 400/12 Turbohaler (AstraZeneca UK Ltd)  
8 Symbicort Turbuhaler 160/4.5 micrograms/dose  
9 Symbicort Turbuhaler 320/9 micrograms/dose  
10 Symbicort Turbuhaler 80/4.5 micrograms/dose  
11 Symbicort 100micrograms/dose / 3micrograms/dose pressurised inhaler (AstraZeneca UK Ltd)  
12 Budesonide 100micrograms/dose / Formoterol 3micrograms/dose inhaler CFC free  
13 Umeclidinium bromide 65micrograms/dose / Vilanterol 22micrograms/dose dry powder inhaler  
14 Anoro Ellipta 55micrograms/dose / 22micrograms/dose dry powder inhaler (GlaxoSmithKline UK Ltd)  
15 Trimbaw 87micrograms/dose / 5micrograms/dose / 9micrograms/dose inhaler (Chiesi Ltd)  
16 Trelegy Ellipta 92micrograms/dose / 55micrograms/dose / 22micrograms/dose dry powder inhaler (GlaxoSmit  
17 Aminophylline 100mg tablets  
18 Aminophylline 225mg modified-release tablets  
19 Aminophylline hydrate 225mg modified-release tablets  
20 Aminophylline hydrate 350mg modified-release tablets  
21 Aminophylline Paediatric tablets 100 mg  
22 Aminophylline Tablets 225 mg  
23 Amnivent 350 Sr tablets 350 mg  
24 Amnivent-225 SR tablets (Ashbourne Pharmaceuticals Ltd)  
25 Biophylline Capsules 350 mg  
26 Biophylline Capsules 500 mg  
27 Biophylline Syrup 125 mg/5 ml  
28 Choline Theophyllinate Syrup 62.5 mg/5 ml  
29 Choline Theophyllinate Tablets 100 mg  
30 Choline Theophyllinate Tablets 200 mg  
31 Choline Theophyllinate Tablets 424 mg  
32 Franol Plus tablets (Sanofi)  
33 Franol tablets (Sanofi)  
34 Lasma Tablets 300 mg  
35 Norphyllin SR 225mg tablets (Teva UK Ltd)  
36 Nuelin 125mg tablets (3M Health Care Ltd)  
37 Nuelin 60mg/5ml liquid (3M Health Care Ltd)  
38 Nuelin SA 175mg tablets (Meda Pharmaceuticals Ltd)  
39 Nuelin SA 250 tablets (Meda Pharmaceuticals Ltd)  
40 Pecram M/R tablets 225 mg  
41 Phyllocontin Continus 225mg tablets (Napp Pharmaceuticals Ltd)  
42 Phyllocontin Forte Continus 350mg tablets (Napp Pharmaceuticals Ltd)  
43 Phyllocontin Paediatric Continus 100mg tablets (Napp Pharmaceuticals Ltd)  
44 Pro-Vent Capsules 300 mg  
45 Sabidal Sr 270 Tablets 424 mg  
46 Slo-Phyllin 125mg capsules (Merck Serono Ltd)  
47 Slo-Phyllin 250mg capsules (Merck Serono Ltd)  
48 Slo-Phyllin 60mg capsules (Merck Serono Ltd)  
49 Tedral Elixir  
50 Tedral Tablets

1  
2 Theodrox Tablets  
3 Theo-Dur 200mg tablets (AstraZeneca UK Ltd)  
4 Theo-Dur 300mg tablets (AstraZeneca UK Ltd)  
5 Theograd Tablets 350 mg  
6 Theophylline 125mg modified-release capsules  
7 Theophylline 125mg tablets  
8 Theophylline 175mg modified-release tablets  
9 Theophylline 200mg modified-release tablets  
10 Theophylline 250mg modified-release capsules  
11 Theophylline 250mg modified-release tablets  
12 Theophylline 300mg modified-release tablets  
13 Theophylline 400mg modified-release tablets  
14 Theophylline 50mg/5ml oral solution  
15 Theophylline 50mg/5ml oral suspension  
16 Theophylline 60mg modified-release capsules  
17 Theophylline 60mg/5ml oral solution  
18 Roflumilast 250microgram tablets  
19 Daxas 250microgram tablets (AstraZeneca UK Ltd)  
20 Roflumilast 500microgram tablets  
21 Daxas 500microgram tablets (AstraZeneca UK Ltd)  
22  
23  
24  
25  
26  
27  
28  
29  
30  
31  
32  
33  
34  
35  
36  
37  
38  
39  
40  
41  
42  
43  
44  
45  
46  
47  
48  
49  
50  
51  
52  
53  
54  
55  
56  
57  
58  
59  
60



1  
2  
3  
4  
5  
6  
7  
8  
9  
10  
11  
12  
13  
14  
15  
16  
17  
18  
19  
20  
21  
22  
23  
24  
25  
26  
27  
28  
29  
30  
31  
32  
33  
34  
35  
36  
37  
38  
39  
40  
41  
42  
43  
44  
45  
46  
47  
48  
49  
50  
51  
52  
53  
54  
55  
56  
57  
58  
59  
60

For peer review only

1  
2  
3  
4  
5  
6  
7  
8  
9  
10  
11  
12  
13  
14  
15  
16  
17  
18  
19  
20  
21  
22  
23  
24  
25  
26  
27  
28  
29  
30  
31  
32  
33  
34  
35  
36  
37  
38  
39  
40  
41  
42  
43  
44  
45  
46  
47  
48  
49  
50  
51  
52  
53  
54  
55  
56  
57  
58  
59  
60

For peer review only

1  
2  
3  
4  
5  
6  
7  
8  
9  
10  
11  
12  
13  
14  
15  
16  
17  
18  
19  
20  
21  
22  
23  
24  
25  
26  
27  
28  
29  
30  
31  
32  
33  
34  
35  
36  
37  
38  
39  
40  
41  
42  
43  
44  
45  
46  
47  
48  
49  
50  
51  
52  
53  
54  
55  
56  
57  
58  
59  
60

For peer review only

1  
2  
3  
4  
5  
6  
7  
8  
9  
10  
11  
12  
13  
14  
15  
16  
17  
18  
19  
20  
21  
22  
23  
24  
25  
26  
27  
28  
29  
30  
31  
32  
33  
34  
35  
36  
37  
38  
39  
40  
41  
42  
43  
44  
45  
46  
47  
48  
49  
50  
51  
52  
53  
54  
55  
56  
57  
58  
59  
60

For peer review only

1  
2  
3  
4  
5  
6  
7  
8  
9  
10  
11  
12  
13  
14  
15  
16  
17  
18  
19  
20  
21  
22  
23  
24  
25  
26  
27  
28  
29  
30  
31  
32  
33  
34  
35  
36  
37  
38  
39  
40  
41  
42  
43  
44  
45  
46  
47  
48  
49  
50  
51  
52  
53  
54  
55  
56  
57  
58  
59  
60

For peer review only

1  
2  
3  
4  
5  
6  
7  
8  
9  
10  
11  
12  
13  
14  
15  
16  
17  
18  
19  
20  
21  
22  
23  
24  
25  
26  
27  
28  
29  
30  
31  
32  
33  
34  
35  
36  
37  
38  
39  
40  
41  
42  
43  
44  
45  
46  
47  
48  
49  
50  
51  
52  
53  
54  
55  
56  
57  
58  
59  
60

For peer review only

1  
2  
3  
4  
5  
6  
7  
8  
9  
10  
11  
12  
13  
14  
15  
16  
17  
18  
19  
20  
21  
22  
23  
24  
25  
26  
27  
28  
29  
30  
31  
32  
33  
34  
35  
36  
37  
38  
39  
40  
41  
42  
43  
44  
45  
46  
47  
48  
49  
50  
51  
52  
53  
54  
55  
56  
57  
58  
59  
60

For peer review only

1  
2  
3  
4  
5  
6  
7  
8  
9  
10  
11  
12  
13  
14  
15  
16  
17  
18  
19  
20  
21  
22  
23  
24  
25  
26  
27  
28  
29  
30  
31  
32  
33  
34  
35  
36  
37  
38  
39  
40  
41  
42  
43  
44  
45  
46  
47  
48  
49  
50  
51  
52  
53  
54  
55  
56  
57  
58  
59  
60

For peer review only



1  
2  
3  
4  
5  
6  
7  
8  
9  
10  
11  
12  
13  
14  
15  
16  
17  
18  
19  
20  
21  
22  
23  
24  
25  
26  
27  
28  
29  
30  
31  
32  
33  
34  
35  
36  
37  
38  
39  
40  
41  
42  
43  
44  
45  
46  
47  
48  
49  
50  
51  
52  
53  
54  
55  
56  
57  
58  
59  
60

For peer review only

1  
2  
3  
4  
5  
6  
7  
8  
9  
10  
11  
12  
13  
14  
15  
16  
17  
18  
19  
20  
21  
22  
23  
24  
25  
26  
27  
28  
29  
30  
31  
32  
33  
34  
35  
36  
37  
38  
39  
40  
41  
42  
43  
44  
45  
46  
47  
48  
49  
50  
51  
52  
53  
54  
55  
56  
57  
58  
59  
60

For peer review only

1  
2  
3  
4  
5  
6  
7  
8  
9  
10  
11  
12  
13  
14  
15  
16  
17  
18  
19  
20  
21  
22  
23  
24  
25  
26  
27  
28  
29  
30  
31  
32  
33  
34  
35  
36  
37  
38  
39  
40  
41  
42  
43  
44  
45  
46  
47  
48  
49  
50  
51  
52  
53  
54  
55  
56  
57  
58  
59  
60

For peer review only

1  
2  
3  
4  
5  
6  
7  
8  
9  
10  
11  
12  
13  
14  
15  
16  
17  
18  
19  
20  
21  
22  
23  
24  
25  
26  
27  
28  
29  
30  
31  
32  
33  
34  
35  
36  
37  
38  
39  
40  
41  
42  
43  
44  
45  
46  
47  
48  
49  
50  
51  
52  
53  
54  
55  
56  
57  
58  
59  
60

For peer review only

1  
2  
3  
4  
5  
6  
7  
8  
9  
10  
11  
12  
13  
14  
15  
16  
17  
18  
19  
20  
21  
22  
23  
24  
25  
26  
27  
28  
29  
30  
31  
32  
33  
34  
35  
36  
37  
38  
39  
40  
41  
42  
43  
44  
45  
46  
47  
48  
49  
50  
51  
52  
53  
54  
55  
56  
57  
58  
59  
60

For peer review only

1  
2  
3  
4  
5  
6  
7  
8  
9  
10  
11  
12  
13  
14  
15  
16  
17  
18  
19  
20  
21  
22  
23  
24  
25  
26  
27  
28  
29  
30  
31  
32  
33  
34  
35  
36  
37  
38  
39  
40  
41  
42  
43  
44  
45  
46  
47  
48  
49  
50  
51  
52  
53  
54  
55  
56  
57  
58  
59  
60

td)

For peer review only

|    |           |
|----|-----------|
| 1  |           |
| 2  | Medcodeid |
| 3  | 2660019   |
| 4  | 4230015   |
| 5  | 5263018   |
| 6  | 6055016   |
| 7  | 22740018  |
| 8  | 24379014  |
| 9  | 28728012  |
| 10 | 41282012  |
| 11 | 43353015  |
| 12 | 60377018  |
| 13 | 63716015  |
| 14 | 69629017  |
| 15 | 80421013  |
| 16 | 84241012  |
| 17 | 101523017 |
| 18 | 108561012 |
| 19 | 108827017 |
| 20 | 111949011 |
| 21 | 116959011 |
| 22 | 124373014 |
| 23 | 151487012 |
| 24 | 199806019 |
| 25 | 251699010 |
| 26 | 254061017 |
| 27 | 255335015 |
| 28 | 271430018 |
| 29 | 271446014 |
| 30 | 271447017 |
| 31 | 271456013 |
| 32 | 271470013 |
| 33 | 271511016 |
| 34 | 271542014 |
| 35 | 271556011 |
| 36 | 271557019 |
| 37 | 271558012 |
| 38 | 271559016 |
| 39 | 271560014 |
| 40 | 271561013 |
| 41 | 271562018 |
| 42 | 271640014 |
| 43 | 271641013 |
| 44 | 271642018 |
| 45 | 271643011 |
| 46 | 271699014 |
| 47 | 271775016 |
| 48 | 271777012 |
| 49 | 271779010 |
| 50 | 271842015 |
| 51 | 271843013 |
| 52 |           |
| 53 |           |
| 54 |           |
| 55 |           |
| 56 |           |
| 57 |           |
| 58 |           |
| 59 |           |
| 60 |           |

For peer review only

1  
2 271891014  
3 272036015  
4 272037012  
5 272102012  
6 287283010  
7 297770011  
8 299790012  
9 299860014  
10 299862018  
11 300242011  
12 300389010  
13 300437018  
14 300438011  
15 300441019  
16 300442014  
17 300445011  
18 300446012  
19 300447015  
20 300448013  
21 300449017  
22 300450017  
23 300451018  
24 300453015  
25 300454014  
26 300457019  
27 300458012  
28 300460014  
29 300463011  
30 300464017  
31 300466015  
32 300468019  
33 300469010  
34 300472015  
35 300477014  
36 300479012  
37 300480010  
38 300482019  
39 300483012  
40 300484018  
41 300485017  
42 300960019  
43 300961015  
44 300962010  
45 300968014  
46 313396018  
47 313424014  
48 313574013  
49 313579015  
50 349674016  
51 349675015

For peer review only



1  
2 349676019  
3 349678018  
4 349689013  
5 349693019  
6 349694013  
7 349717014  
8 350577018  
9 354498012  
10 354499016  
11 369052016  
12 394307019  
13 394322012  
14 394337011  
15 395755010  
16 400814019  
17 410960011  
18 410969012  
19 410970013  
20 410972017  
21 410973010  
22 411503014  
23 437650013  
24 455424010  
25 458502011  
26 458503018  
27 458504012  
28 470121011  
29 480891014  
30 484314018  
31 506344012  
32 1221083011  
33 1229954013  
34 1232666014  
35 1235573016  
36 1476248016  
37 1488824018  
38 2536174018  
39 2674096019  
40 2675433011  
41 2675434017  
42 3509863013  
43 3527043019  
44 17311000006112  
45 17351000006113  
46 17361000006110  
47 17401000006117  
48 45851000006116  
49 45861000006119  
50 46601000006110  
51 173441000006111

For peer review only

1  
2 173451000006113  
3 173461000006110  
4 173471000006115  
5 173481000006117  
6 173491000006119  
7  
8 173501000006110  
9 173511000006113  
10 173521000006117  
11 173531000006119  
12 173541000006112  
13  
14 173551000006114  
15 173561000006111  
16 173571000006116  
17 173581000006118  
18 173591000006115  
19  
20 173601000006111  
21 173611000006114  
22 173621000006118  
23 173631000006115  
24 173641000006113  
25 173651000006110  
26 173661000006112  
27 173671000006117  
28 173691000006116  
29  
30 173711000006118  
31 193381000006117  
32 235491000006115  
33 356341000000113  
34 357881000000111  
35 359091000000110  
36 359231000000117  
37 359851000000113  
38 360051000000118  
39 377701000000114  
40 377721000000117  
41 377741000000112  
42 377901000000111  
43 384321000000116  
44 384381000000115  
45 384421000000112  
46 482451000006111  
47 482711000006116  
48 488221000000111  
49 488231000000113  
50 488301000006118  
51 542501000006110  
52 542511000006113  
53 557541000006111  
54 639641000006113  
55 639651000006110  
56  
57  
58  
59  
60

For peer review only

1  
2 639681000006119  
3 639701000006116  
4 639711000006118  
5 639721000006114  
6 639731000006112  
7  
8 639751000006117  
9 639761000006115  
10 639771000006110  
11 639781000006113  
12 639791000006111  
13 639801000006112  
14 639811000006110  
15 639821000006119  
16 639831000006116  
17 639841000006114  
18 639851000006111  
19 639861000006113  
20 639871000006118  
21 639881000006115  
22 639891000006117  
23 639901000006118  
24 639911000006115  
25 639921000006111  
26 640131000006119  
27 640141000006112  
28 640151000006114  
29 640181000006118  
30 640221000006110  
31 745471000000118  
32 750511000000117  
33 865061000006117  
34 865091000006113  
35 865741000006118  
36 865761000006119  
37 865981000006114  
38 866171000006118  
39 884551000006112  
40 884591000006118  
41 884601000006114  
42 905511000006118  
43 933331000006114  
44 988061000006116  
45 1547161000006110  
46 1548161000006110  
47 1548221000006110  
48 1548531000006110  
49 1548541000006110  
50 1548551000006110  
51 1548561000006110  
52 1548601000006110

For peer review only

1  
2 1548611000006110  
3 1548621000006110  
4 1548631000006110  
5 1548641000006110  
6 1548661000006110  
7 1548671000006110  
8 1548681000006110  
9 1548691000006110  
10 1548701000006110  
11 1548721000006110  
12 1548731000006110  
13 1587731000006110  
14 1587741000006110  
15 1587751000006110  
16 1587761000006110  
17 1587791000006110  
18 1587801000006110  
19 1587811000006110  
20 1701691000006110  
21 1701701000006110  
22 1701731000006110  
23 1728191000006110  
24 1756091000006110  
25 1775111000006110  
26 1795071000000110  
27 1920821000006110  
28 1948021000006110  
29 1967531000006110  
30 1967541000006110  
31 2209021000000110  
32 2209101000000110  
33 2528641000006110  
34 2528651000006110  
35 2672991000006110  
36 2724301000006110  
37 2805751000006110  
38 2833771000006110  
39 2833781000006110  
40 2893081000006110  
41 2906401000006110  
42 2914151000006110  
43 3047311000006110  
44 3048141000006110  
45 3193191000006110  
46 3193201000006110  
47 3205001000006110  
48 3267111000006110  
49 3280921000006110  
50 3318871000006110  
51 3337221000006110  
52  
53  
54  
55  
56  
57  
58  
59  
60

For peer review only

1  
2 3378551000006110  
3 3378561000006110  
4 3454911000006110  
5 3595951000006110  
6 3603051000006110  
7 3645041000006110  
8 3717321000006110  
9 3720801000006110  
10 3733811000006110  
11 3882971000006110  
12 3888721000006110  
13 3892581000006110  
14 3892591000006110  
15 3916261000006110  
16 3971381000006110  
17 4056701000006110  
18 4193531000006110  
19 4214391000006110  
20 4374441000006110  
21 4374471000006110  
22 4411861000006110  
23 4411871000006110  
24 4666401000006110  
25 4666411000006110  
26 4778451000006110  
27 4778471000006110  
28 4778491000006110  
29 4778511000006110  
30 4778531000006110  
31 4778551000006110  
32 4778571000006110  
33 4778611000006110  
34 4778651000006110  
35 5011581000006110  
36 5013891000006110  
37 5013901000006110  
38 5013951000006110  
39 5049881000006110  
40 5049891000006110  
41 5058411000006110  
42 5058441000006110  
43 5058511000006110  
44 5058561000006110  
45 5059771000006110  
46 5359511000006110  
47 5476971000006110  
48 5559481000006110  
49 5582901000006110  
50 5582931000006110  
51 5582941000006110  
52  
53  
54  
55  
56  
57  
58  
59  
60

For peer review only

1  
2 5582951000006110  
3 5583011000006110  
4 5583021000006110  
5 5583061000006110  
6 5583081000006110  
7 5583101000006110  
8 5583121000006110  
9 5595881000006110  
10 5595891000006110  
11 5595911000006110  
12 5597481000006110  
13 5597491000006110  
14 5597601000006110  
15 5597651000006110  
16 5659051000006110  
17 5836981000006110  
18 5837001000006110  
19 5837011000006110  
20 5893531000006110  
21 6057441000006110  
22 6213481000006110  
23 6376851000006110  
24 6714811000006110  
25 6714991000006110  
26 6830551000006110  
27 7049311000006110  
28 7052131000006110  
29 7066671000006110  
30 7090311000006110  
31 7097771000006110  
32 7107501000006110  
33 7173251000006110  
34 7217961000006110  
35 7224311000006110  
36 7260131000006110  
37 7294891000006110  
38 7351071000006110  
39 7515621000006110  
40 7974971000006110  
41 8271361000006110  
42 8284091000006110  
43 9478231000006110  
44 9836881000006110  
45 9836901000006110  
46 9836911000006110  
47 9836931000006110  
48 9836971000006110  
49 12705151000006100  
50 13502851000006100  
51 13630281000006100  
52  
53  
54  
55  
56  
57  
58  
59  
60

For peer review only

1  
2 13630291000006100  
3 13630311000006100  
4 13630331000006100  
5 13630341000006100  
6 13635861000006100  
7 13769841000006100  
8 14198581000006100  
9 7360411000006110  
10 206453010  
11 3513499011  
12 1767981000006110  
13 2531191000006110  
14 3793591000006110  
15 6843551000006110  
16 300603016  
17 473459011  
18 2545121000006110  
19 3009771000006110  
20 6203441000006110  
21 6203451000006110  
22 13632601000006100  
23 13632611000006100  
24 13632621000006100  
25 753651000006116  
26 2959311000006110  
27 5059971000006110  
28 5339081000006110  
29 7372971000006110  
30 9835451000006110  
31 47965014  
32 47966010  
33 75071013  
34 128722012  
35 300835018  
36 300837014  
37 300988013  
38 2160047013  
39 884961000006115  
40 2281911000000110  
41 3443351000006110  
42 5010701000006110  
43 7161931000006110  
44 7987561000006110  
45 8156931000006110  
46 93510018  
47 140745011  
48 379509010  
49 412415012  
50 481149018  
51 3511443018  
52  
53  
54  
55  
56  
57  
58  
59  
60

For peer review only

1  
2 2502591000006110  
3 2847941000006110  
4 2848021000006110  
5 2848031000006110  
6 2995311000006110  
7  
8 3413641000006110  
9 3976541000006110  
10 4059171000006110  
11 4212421000006110  
12 4212431000006110  
13  
14 4779251000006110  
15 5030781000006110  
16 5030791000006110  
17 5036761000006110  
18 5126041000006110  
19 5126061000006110  
20 5126081000006110  
21 5126171000006110  
22 5350181000006110  
23 6041471000006110  
24 7005251000006110  
25 7516461000006110  
26 7573291000006110  
27 11790741000006100  
28 12052411000006100  
29  
30 53457013  
31 91895012  
32 293373010  
33 297777014  
34 309393014  
35 357845012  
36 1779323014  
37 3441922013  
38 65971000006112  
39 2687811000006110  
40 2932281000006110  
41 2932291000006110  
42 3247871000006110  
43 3258811000006110  
44 3483561000006110  
45 3483571000006110  
46 3483581000006110  
47 3483611000006110  
48 4762491000006110  
49 4770431000006110  
50 5126351000006110  
51 5141711000006110  
52 5141731000006110  
53 5141761000006110  
54 6668381000006110  
55  
56  
57  
58  
59  
60

For peer review only



1  
2 7047591000006110  
3 7067811000006110  
4 7480781000006110  
5 7858331000006110  
6 7858361000006110  
7  
8 12369161000006100  
9 12369171000006100  
10 13680441000006100  
11 13682661000006100  
12 14071261000006100  
13 14073411000006100  
14  
15 105536013  
16 375462013  
17 411512011  
18 445146016  
19  
20 1715241000006110  
21 3532661000006110  
22 4056731000006110  
23 4056741000006110  
24 8279141000006110  
25  
26 251690014  
27 254104013  
28 272209014  
29 272214013  
30 272215014  
31 272216010  
32 272219015  
33 272221013  
34 272222018  
35 272223011  
36 272234014  
37 272235010  
38 272236011  
39 272237019  
40 284209016  
41 300721013  
42 300723011  
43 300724017  
44 300727012  
45 300728019  
46 300730017  
47 300795013  
48 300796014  
49 300982014  
50 350683012  
51 350684018  
52 355723016  
53 355724010  
54 355726012  
55 394358017  
56  
57  
58  
59  
60

For peer review only

1  
2 394359013  
3 394360015  
4 411635018  
5 451448014  
6 457115011  
7 489882019  
8 1221208011  
9 65611000006114  
10 124301000006115  
11 299441000000114  
12 311501000000116  
13 357921000000117  
14 358141000000110  
15 360251000000111  
16 377221000000113  
17 377241000000118  
18 384681000000110  
19 384721000000115  
20 501531000006116  
21 571551000006119  
22 715361000006118  
23 743601000006118  
24 866371000006116  
25 866391000006115  
26 866401000006118  
27 866411000006115  
28 866421000006111  
29 884761000006118  
30 884771000006113  
31 884781000006111  
32 884791000006114  
33 884801000006110  
34 884811000006113  
35 884821000006117  
36 884921000006114  
37 888661000006119  
38 888671000006114  
39 905481000006114  
40 906691000006119  
41 939531000006118  
42 988071000006111  
43 989231000006113  
44 989241000006115  
45 991661000006118  
46 1548941000006110  
47 1548961000006110  
48 1549411000006110  
49 1587911000006110  
50 2507391000006110  
51 2507401000006110

For peer review only

1  
2 2524641000006110  
3 2524661000006110  
4 2704161000006110  
5 2747631000006110  
6 2747641000006110  
7  
8 3627911000006110  
9 3685041000006110  
10 3723031000006110  
11 4779571000006110  
12 4779581000006110  
13  
14 5051001000006110  
15 5051011000006110  
16 5059471000006110  
17 5358501000006110  
18 5492341000006110  
19 5492351000006110  
20 5492361000006110  
21 5575541000006110  
22 5723991000006110  
23 5730501000006110  
24 5924591000006110  
25 5929681000006110  
26 5935521000006110  
27 6029061000006110  
28 6029071000006110  
29 6029101000006110  
30 6596321000006110  
31 7106171000006110  
32 7361421000006110  
33 7373301000006110  
34 7373311000006110  
35 7373891000006110  
36 7373931000006110  
37 7380141000006110  
38 7609731000006110  
39 7700361000006110  
40 8426871000006110  
41 12705041000006100  
42 272195016  
43 272203010  
44 272204016  
45 300848019  
46 2829111000006110  
47 5059391000006110  
48 5059411000006110  
49 5059421000006110  
50 5059431000006110  
51 6668581000006110  
52 7235821000006110  
53 7573311000006110  
54  
55  
56  
57  
58  
59  
60

For peer review only

1  
2 345710016  
3 7806281000006110  
4 9843291000006110  
5 9843651000006110  
6 9843691000006110  
7  
8 1216343012  
9 1216721019  
10 2994811000006110  
11 3364751000006110  
12 5050271000006110  
13  
14 300366019  
15 449935012  
16 451371010  
17 1212072018  
18 1227591017  
19 2474330011  
20 2476091017  
21 2548554013  
22 3509817019  
23 3521990012  
24 138981000000113  
25 139081000000117  
26 139091000000115  
27 149571000006118  
28 162111000000112  
29 306621000000116  
30 371641000000112  
31 426321000006116  
32 524511000006116  
33 907581000006119  
34 907591000006116  
35 908801000006114  
36 928621000006111  
37 966981000006112  
38 968341000006116  
39 171663100000115  
40 1757281000006116  
41 1784651000006110  
42 1863321000006113  
43 1992451000006114  
44 1994761000006112  
45 2008521000006110  
46 2008601000006116  
47 2901571000006113  
48 3142511000006112  
49 4057041000006110  
50 4193641000006111  
51 5011071000006114  
52 5011081000006112  
53 5011111000006118

For peer review only

1 5011121000006114  
2 5011141000006119  
3 5011461000006111  
4 5011471000006116  
5 5011871000006119  
6 5960821000006117  
7 5960951000006117  
8 5960971000006110  
9 6348291000006115  
10 6348301000006119  
11 6349401000006115  
12 6837051000006119  
13 6846141000006118  
14 6990981000006114  
15 6990991000006112  
16 7071911000006114  
17 7703601000006113  
18 7855631000006111  
19 7861341000006115  
20 8014911000006110  
21 8026451000006117  
22 8044481000006118  
23 8196061000006110  
24 8264201000006110  
25 8265471000006116  
26 8453031000006117  
27 8453821000006113  
28 9912271000006112  
29 13718641000006112  
30 13909861000006114  
31 13909881000006116  
32 13909891000006118  
33 13909901000006119  
34 14182621000006113  
35 14194161000006118  
36 14194651000006114  
37 14194811000006114  
38 264499015  
39 411416011  
40 413750011  
41 3508956015  
42 3508962013  
43 3508965010  
44 3516948016  
45 122361000006113  
46 122401000006115  
47 884521000006115  
48 884531000006117  
49 940051000006114  
50 940061000006111

For peer review only

1  
2 940071000006116  
3 940081000006118  
4 1160471000000111  
5 1682791000006112  
6 1726581000006116  
7  
8 2115821000000118  
9 2118011000000114  
10 2126181000000114  
11 2127781000000110  
12 2539131000006116  
13 5010981000006119  
14 5011451000006114  
15 5866391000006119  
16 5866401000006117  
17 7568281000006111  
18 7597121000006117  
19 7618821000006118  
20 8195431000006118  
21 8274811000006116  
22 300312010  
23 300313017  
24 300321011  
25 300322016  
26 300411016  
27 300941014  
28 395780010  
29 451133011  
30 451134017  
31 267321000006114  
32 370701000006118  
33 542251000006112  
34 542261000006114  
35 543141000006110  
36 841051000006113  
37 1573101000006112  
38 1576261000006112  
39 1900601000006111  
40 1900651000006110  
41 2436731000000112  
42 2729551000000111  
43 2729571000000119  
44 5011041000006118  
45 5011051000006116  
46 5011061000006119  
47 5011091000006110  
48 5011101000006116  
49 5011131000006112  
50 5011291000006119  
51 5011331000006114  
52 5011351000006119

For peer review only

1  
2 5582311000006110  
3 7598981000006119  
4 7599001000006116  
5 7839991000006115  
6 8011371000006117  
7  
8 296995010  
9 405339016  
10 1227592012  
11 3508952018  
12 3508955016  
13 3508958019  
14 3508961018  
15 3508964014  
16 3509777019  
17 3509790014  
18 3509794017  
19 3509799010  
20 3509810017  
21 3636133016  
22 605461000006117  
23 605481000006110  
24 605491000006113  
25 809421000006116  
26 1773371000006117  
27 4778181000006119  
28 4778201000006118  
29 5649201000006113  
30 7519441000006112  
31 13717171000006112  
32 13718601000006110  
33 13718621000006117  
34 14014251000006116  
35 14194191000006114  
36 14194211000006110  
37 14194281000006115  
38 14194331000006112  
39 14194491000006118  
40 14194571000006115  
41 14194611000006113  
42 14194641000006112  
43 14194661000006111  
44 14194741000006118  
45 14194801000006111  
46 14194841000006113  
47 14194941000006115  
48 14194971000006111  
49 300370010  
50 300371014  
51 411518010  
52 1780304018  
53  
54  
55  
56  
57  
58  
59  
60

For peer review only

1  
2 605501000006117  
3 909171000006115  
4 87208017  
5 89332015  
6 92070010  
7  
8 99508014  
9 271162013  
10 271507010  
11 271508017  
12 271533019  
13 271534013  
14 271561013  
15 271562018  
16 271607017  
17 271608010  
18 271613014  
19 271688012  
20 271738014  
21 271740016  
22 271746010  
23 272013012  
24 272014018  
25 294652012  
26 294653019  
27 294654013  
28 294655014  
29 294656010  
30 300200014  
31 300433019  
32 300434013  
33 300435014  
34 300436010  
35 300503012  
36 300959012  
37 394328011  
38 394329015  
39 394346017  
40 410964019  
41 410965018  
42 410987010  
43 444906018  
44 444907010  
45 497559016  
46 1230211012  
47 2533125014  
48 2536393012  
49 2675439010  
50 213421000006113  
51 218531000000113  
52 363791000006112

For peer review only



1  
2 491581000006110  
3 496971000006110  
4 496981000006113  
5 496991000006111  
6 497011000006117  
7  
8 595731000006114  
9 641501000006112  
10 641511000006110  
11 641521000006119  
12 641541000006114  
13 641551000006111  
14 641561000006113  
15 641571000006118  
16 641681000006116  
17 641691000006118  
18 641691000006118  
19 641701000006118  
20 641711000006115  
21 641721000006111  
22 641731000006114  
23 641751000006119  
24 865311000006118  
25 866181000006115  
26 866211000006116  
27 866221000006112  
28 884411000006110  
29 884541000006110  
30 884571000006119  
31 884581000006116  
32 905551000006117  
33 932371000006118  
34 932471000006114  
35 938561000006115  
36 1548361000006119  
37 1746621000006118  
38 2609111000000119  
39 2762941000006113  
40 2829381000006119  
41 2965761000006111  
42 2974031000006111  
43 2974041000006118  
44 3123251000006118  
45 3123261000006116  
46 3145221000006111  
47 3230441000006110  
48 3283641000006112  
49 3283661000006111  
50 3455091000006118  
51 3521721000006113  
52 3561811000006118  
53 3588611000006113  
54  
55  
56  
57  
58  
59  
60

For peer review only

1 3600701000006114  
2 3830431000006112  
3 3964651000006112  
4 3964661000006114  
5 4005601000006116  
6 4315321000006116  
7 4427851000006112  
8 4427861000006114  
9 4427871000006119  
10 4721241000006111  
11 5040281000006119  
12 5048771000006110  
13 5048911000006115  
14 5048921000006111  
15 5057931000006110  
16 5153971000006113  
17 5592751000006111  
18 5592861000006115  
19 5886761000006114  
20 6583131000006110  
21 6714201000006113  
22 6946631000006113  
23 7080821000006111  
24 7100421000006116  
25 7106991000006111  
26 7252001000006111  
27 7278491000006111  
28 7298951000006115  
29 7789771000006114  
30 7855741000006112  
31 8086861000006114  
32 8086901000006119  
33 9868461000006110  
34 12122231000006112  
35 12125951000006116  
36 13919651000006113  
37 13919691000006119  
38 13964771000006111  
39 14180191000006115  
40 31287015  
41 119660019  
42 271057014  
43 299603011  
44 299604017  
45 299605016  
46 299606015  
47 299607012  
48 299608019  
49 299609010  
50 299988019

For peer review only

1  
2 299990018  
3 299991019  
4 313382012  
5 313473017  
6 313485013  
7 377722014  
8 377727015  
9 510302016  
10 1232103019  
11 116861000006111  
12 172601000006117  
13 580501000006119  
14 585311000006117  
15 884031000006113  
16 2210341000000113  
17 5056701000006119  
18 5056721000006112  
19 5058151000006118  
20 5061331000006113  
21 5503471000006117  
22 5590561000006116  
23 7075031000006117  
24 7111971000006119  
25 13501811000006118  
26 13717171000006112  
27 13936851000006111  
28 13936861000006113  
29 13936871000006118  
30 13936881000006115  
31 13936891000006117  
32 13936901000006118  
33 14194191000006114  
34 14194661000006111  
35 300022014  
36 124807019  
37 141891015  
38 150511013  
39 299958011  
40 300911012  
41 488551000006110  
42 6611081000006118  
43 6873341000006113  
44 104563015  
45 265692011  
46 295680015  
47 295681016  
48 297013012  
49 300244012  
50 300253017  
51 300257016

For peer review only

1  
2 300277011  
3 300287010  
4 300374018  
5 300379011  
6 300401011  
7 300402016  
8 300403014  
9 300406018  
10 300407010  
11 300418010  
12 300419019  
13 300935019  
14 300936018  
15 300944018  
16 300956017  
17 316150014  
18 316519019  
19 481028017  
20 123381000006110  
21 123441000006112  
22 123491000006115  
23 123511000006114  
24 123521000006118  
25 149701000006118  
26 163261000006119  
27 314291000000112  
28 370711000006115  
29 398571000006112  
30 399031000006111  
31 407291000006117  
32 417171000006111  
33 426481000006114  
34 428201000006119  
35 431681000006117  
36 431691000006119  
37 621391000000116  
38 696161000006115  
39 744921000006116  
40 746571000006116  
41 748941000006115  
42 800691000006113  
43 808111000006110  
44 914921000006117  
45 1130181000000113  
46 1809201000006113  
47 1809211000006111  
48 1855561000006117  
49 1855571000006112  
50 1857051000006118  
51 1972481000006114

For peer review only

1  
2 1972501000006116  
3 1972571000006110  
4 1972661000006119  
5 1972681000006112  
6 1972711000006113  
7  
8 1972731000006119  
9 1972751000006114  
10 1972791000006115  
11 1972821000006112  
12 1972831000006110  
13 1972871000006113  
14 1972911000006111  
15 1972931000006117  
16 1973221000006118  
17 1973271000006117  
18 1973271000006117  
19 1973341000006118  
20 1973381000006112  
21 1973401000006112  
22 1973461000006113  
23 1973531000006117  
24 1976831000006111  
25 2664611000006117  
26 2729791000000114  
27 2841141000006111  
28 2912321000006113  
29 3414231000006117  
30 3414251000006112  
31 3522701000006112  
32 3653671000006113  
33 4540691000006112  
34 4777861000006119  
35 4777881000006112  
36 4778311000006112  
37 5011581000006119  
38 5011861000006114  
39 5459271000006119  
40 5459301000006117  
41 5583021000006113  
42 5583061000006119  
43 5583081000006112  
44 5583101000006116  
45 5583121000006114  
46 5589641000006112  
47 7378421000006118  
48 7572361000006118  
49 7834511000006116  
50 7840631000006118  
51 8089231000006110  
52 8089241000006117  
53 8089851000006116  
54  
55  
56  
57  
58  
59  
60

For peer review only

1  
2 8107381000006118  
3 12223101000006118  
4 12370651000006112  
5 13796131000006110  
6 13909901000006119  
7 13934381000006118  
8  
9 98484016  
10 251693011  
11 271392011  
12 271394012  
13 271400014  
14 305585018  
15 307815016  
16 307816015  
17 307819010  
18 307821017  
19 307826010  
20 307827018  
21 307831012  
22 307832017  
23 307833010  
24 307834016  
25 307838018  
26 307847014  
27 307856018  
28 307861016  
29 307862011  
30 307866014  
31 307867017  
32 307868010  
33 307869019  
34 307871019  
35 307872014  
36 350517010  
37 398448013  
38 398450017  
39 451479013  
40 2549664019  
41 24951000006110  
42 24981000006119  
43 193601000006115  
44 216591000006115  
45 232951000006114  
46 261021000006119  
47 268641000006113  
48 268671000006117  
49 269411000006115  
50 269431000006114  
51 269441000006116  
52 269891000006110

For peer review only

1  
2 269901000006114  
3 479841000006113  
4 479891000006116  
5 479901000006117  
6 632111000000118  
7  
8 888731000006119  
9 905451000006118  
10 1142071000000114  
11 1548051000006118  
12 1749291000006113  
13 4540611000006119  
14 4666331000006118  
15 5057591000006116  
16 5057621000006119  
17 5057651000006111  
18 5057661000006113  
19 5057671000006118  
20 5057691000006117  
21 5057801000006113  
22 5645781000006111  
23 5888821000006111  
24 5888831000006114  
25 6452821000006114  
26 7126941000006112  
27 7609581000006110  
28 7617181000006110  
29 7967281000006119  
30 8042101000006112  
31 8106001000006111  
32 6978012  
33 57824015  
34 97316014  
35 198017011  
36 216207010  
37 316797019  
38 395771010  
39 1230146013  
40 2156000010  
41 2159197017  
42 2474710010  
43 2548656015  
44 2549128016  
45 311291000000114  
46 541761000006114  
47 624251000006114  
48 1734281000000117  
49 1734721000000114  
50 1976701000006111  
51 1976731000006115  
52 1976751000006110

For peer review only

1  
2 1991651000006115  
3 5125501000006111  
4 5647291000006110  
5 7119761000006112  
6 7487181000006110  
7  
8 7487191000006113  
9 7510321000006115  
10 8035211000006110  
11 14092491000006115  
12 9988012  
13  
14 46970012  
15 119267012  
16 256476019  
17 256477011  
18 256479014  
19 256481011  
20 256482016  
21 256483014  
22 283026012  
23 283027015  
24 283028013  
25 283030010  
26 419130013  
27 1230147016  
28 1488856013  
29 2533404015  
30 2691915013  
31 2692063011  
32 2982426011  
33 303041000000112  
34 1680541000006114  
35 1687291000006116  
36 1715351000000110  
37 2861931000006112  
38 3210341000006114  
39 3439061000006111  
40 3776881000006112  
41 5040661000006110  
42 5046591000006116  
43 5046601000006112  
44 5046621000006119  
45 5046631000006116  
46 5296151000006119  
47 5330731000006110  
48 5331151000006110  
49 5331161000006112  
50 5374491000006112  
51 5586331000006117  
52 5586351000006112  
53 5590601000006116  
54  
55  
56  
57  
58  
59  
60

For peer review only



1  
2 5682831000006116  
3 7073201000006115  
4 7327431000006118  
5 7450811000006118  
6 7517391000006117  
7  
8 8213971000006113  
9 8238681000006119  
10 8242031000006111  
11 256452010  
12 256453017  
13  
14 256454011  
15 256460011  
16 299707016  
17 299709018  
18  
19 299710011  
20 299712015  
21 299714019  
22 299718016  
23 299720018  
24 299721019  
25 299742017  
26  
27 299808017  
28 299811016  
29 299812011  
30 299813018  
31 300881018  
32 300882013  
33 350376014  
34 397701010  
35 451369010  
36 455422014  
37 455423016  
38 460138014  
39 460139018  
40 460141017  
41 461192018  
42 1780271011  
43 100681000006116  
44 118831000006118  
45 158601000006116  
46 158611000006118  
47 159001000006119  
48 212061000006119  
49 212071000006114  
50 212081000006112  
51 212091000006110  
52 217371000000119  
53 217381000000117  
54 217411000000115  
55 217421000000114  
56  
57  
58  
59  
60

For peer review only

1  
2 219521000000119  
3 219531000000117  
4 407181000000116  
5 408571000006116  
6 455641000006112  
7 460681000006116  
8 537751000006115  
9 543291000006110  
10 547951000006116  
11 611411000006115  
12 616081000006113  
13 667421000006117  
14 667431000006119  
15 682481000006118  
16 813961000006116  
17 884151000006119  
18 905351000006113  
19 967931000006114  
20 1576271000006117  
21 1678621000006111  
22 1686871000000113  
23 1738171000006114  
24 1741571000006114  
25 2855301000006112  
26 2855341000006114  
27 2855351000006111  
28 3024781000006112  
29 3427201000006111  
30 3452181000006112  
31 3459561000006119  
32 3551171000006114  
33 3565871000006113  
34 3576371000006117  
35 3641641000006116  
36 3699921000006110  
37 3745741000006117  
38 4775931000006111  
39 5056411000006110  
40 5056421000006119  
41 5056431000006116  
42 5056441000006114  
43 5056461000006113  
44 5495521000006113  
45 5569701000006117  
46 5605381000006117  
47 5608431000006115  
48 5935321000006111  
49 6043771000006118  
50 7208001000006118  
51 7510331000006117

For peer review only

1  
2 7571581000006113  
3 7571601000006115  
4 7571611000006117  
5 7572221000006117  
6 7572321000006112  
7  
8 7572331000006110  
9 7572341000006117  
10 7572881000006117  
11 7574041000006111  
12 7574481000006111  
13  
14 7574491000006114  
15 7662871000006115  
16 8011041000006111  
17 8087551000006113  
18 8087751000006116  
19  
20 8193681000006118  
21 8193701000006115  
22 8308931000006114  
23 9843961000006118  
24 9843981000006111  
25 9843991000006114  
26 9868571000006116  
27  
28 11998561000006114  
29 11998631000006118  
30 12122331000006116  
31 12122341000006114  
32 13930031000006112  
33 13935161000006114  
34 13941111000006112  
35 13941141000006111  
36 13941161000006110  
37 13941211000006118  
38 13941231000006112  
39 13945211000006116  
40 13947721000006111  
41 13961451000006111  
42 13961461000006113  
43 14015031000006119  
44 14057221000006111  
45 14132941000006118  
46 14132951000006116  
47 14145371000006117  
48 14145451000006115  
49 3288511000006116  
50 6651391000006114  
51 14132941000006118  
52 14132951000006116  
53 14145371000006117  
54 14145451000006115  
55 3288511000006116  
56  
57  
58  
59  
60

For peer review only

1  
2 6651391000006114  
3 43850011  
4 60444016  
5 90135019  
6 107545013  
7 109700019  
8 110659019  
9 143003017  
10 146259010  
11 299650019  
12 299654011  
13 299655012  
14 299673010  
15 299675015  
16 350517010  
17 411508017  
18 504901000006118  
19 728671000006119  
20 741661000006118  
21 741681000006111  
22 741691000006114  
23 741701000006114  
24 789941000006117  
25 884131000006114  
26 905451000006118  
27 1749291000006113  
28 2297871000000111  
29 2297911000000113  
30 2297951000000112  
31 2297991000000116  
32 2674471000006117  
33 3244761000006113  
34 3552501000006119  
35 3654631000006113  
36 5057801000006113  
37 5590581000006114  
38 6214751000006112  
39 7052811000006113  
40 7501601000006111  
41 7501711000006118  
42 13941061000006111  
43 13941071000006116  
44 7360241000006116  
45 82343012  
46 119481012  
47 251698019  
48 256478018  
49 256485019  
50 300130013  
51 300132017

For peer review only

1  
2 300133010  
3 300134016  
4 350465014  
5 421235014  
6 456154015  
7  
8 1488912012  
9 2674487014  
10 2675253013  
11 376541000000117  
12 385221000000110  
13 386991000000110  
14 636701000000115  
15 636721000000112  
16 783761000006118  
17 1547561000006113  
18 1547571000006118  
19 1547611000006111  
20 1701641000006111  
21 1810721000006117  
22 1823951000006111  
23 1905451000006118  
24 2006271000006112  
25 2309761000000114  
26 2309851000000115  
27 2805631000006119  
28 2805651000006114  
29 3063041000006112  
30 3299911000006116  
31 3679061000006111  
32 3679071000006116  
33 5046721000006110  
34 5046731000006113  
35 5046751000006118  
36 5057261000006110  
37 5669591000006113  
38 5669601000006117  
39 5669611000006119  
40 5887651000006116  
41 6016401000006115  
42 6043781000006115  
43 7064691000006118  
44 7101091000006119  
45 7152861000006115  
46 7185061000006114  
47 7254921000006110  
48 7261781000006116  
49 7275691000006117  
50 7292711000006116  
51 7338801000006111  
52 7375931000006117

For peer review only

1  
2 7428901000006112  
3 7455581000006115  
4 7594061000006119  
5 7594071000006114  
6 7610331000006110  
7  
8 7731461000006119  
9 8021691000006116  
10 8037691000006113  
11 8316981000006114  
12 8439861000006115  
13  
14 14161691000006115  
15 173401000006114  
16 173421000006116  
17 30273012  
18 64466019  
19 87208017  
20 98484016  
21 118689010  
22 129661016  
23 135665013  
24 158317012  
25 216205019  
26 251689017  
27 296931015  
28 296938014  
29 296939018  
30 296940016  
31 296947018  
32 296948011  
33 296949015  
34 296950015  
35 296951016  
36 297138017  
37 299742017  
38 300234010  
39 300312010  
40 300321011  
41 300503012  
42 300533017  
43 300534011  
44 300535012  
45 300536013  
46 300537016  
47 300538014  
48 300539018  
49 300540016  
50 300541017  
51 300542012  
52 300543019  
53 300547018  
54  
55  
56  
57  
58  
59  
60

For peer review only

1  
2 300550015  
3 300552011  
4 300553018  
5 300554012  
6 300555013  
7 300556014  
8 300557017  
9 300558010  
10 300559019  
11 300561011  
12 300562016  
13 300563014  
14 300564015  
15 300672010  
16 300673017  
17 300674011  
18 300676013  
19 300677016  
20 300681016  
21 300691010  
22 300692015  
23 300695018  
24 300696017  
25 300697014  
26 300704016  
27 300710016  
28 300711017  
29 300712012  
30 300713019  
31 300964011  
32 302984016  
33 304527018  
34 304536019  
35 305585018  
36 307739018  
37 307740016  
38 307741017  
39 307742012  
40 307747018  
41 307749015  
42 307750015  
43 307780013  
44 307781012  
45 307782017  
46 307815016  
47 307832017  
48 307833010  
49 307834016  
50 307838018  
51 307861016  
52  
53  
54  
55  
56  
57  
58  
59  
60

For peer review only

1  
2 307862011  
3 307866014  
4 307867017  
5 307868010  
6 307869019  
7 307871019  
8 307872014  
9 307872014  
10 325205013  
11 345723011  
12 350892013  
13 395794011  
14 395795012  
15 395796013  
16 395801015  
17 395803017  
18 398450017  
19 411540018  
20 412645018  
21 419640012  
22 437622013  
23 449993015  
24 451478017  
25 451479013  
26 452963015  
27 453210011  
28 494431010  
29 495552014  
30 497563011  
31 497564017  
32 503317010  
33 1227369013  
34 1235655012  
35 1235913017  
36 1786197015  
37 1786198013  
38 2162148012  
39 2162149016  
40 2162422011  
41 2534187010  
42 2675439010  
43 2675878019  
44 2695366017  
45 2795114019  
46 3505881015  
47 3511086012  
48 3511955015  
49 3511959014  
50 3636257010  
51 3636258017  
52 19801000006110

For peer review only



1  
2 19831000006119  
3 19841000006112  
4 19851000006114  
5 19861000006111  
6 19871000006116  
7  
8 19881000006118  
9 24951000006110  
10 24981000006119  
11 24991000006116  
12 100681000006116  
13 100691000006118  
14 100701000006118  
15 100721000006111  
16 100771000006112  
17  
18 100811000006112  
19 100821000006116  
20 200961000006116  
21 211691000006114  
22 215511000000110  
23 216571000006116  
24 217601000000119  
25 218541000000116  
26 218551000000118  
27 231561000006110  
28 238581000006112  
29 238621000006112  
30 238651000006115  
31 268641000006113  
32 268671000006117  
33 269411000006115  
34 269431000006114  
35 269441000006116  
36 358041000000114  
37 359731000000112  
38 359871000000116  
39 420621000006111  
40 491241000006118  
41 542251000006112  
42 586241000006116  
43 632111000000118  
44 632731000006118  
45 638821000006113  
46 638871000006114  
47 801981000006111  
48 851241000006115  
49 866221000006112  
50 884141000006116  
51 884631000006118  
52 884641000006111  
53 884651000006113  
54  
55  
56  
57  
58  
59  
60

For peer review only

1  
2 884731000006110  
3 884751000006115  
4 888681000006112  
5 888691000006110  
6 888731000006119  
7  
8 905491000006112  
9 909471000006114  
10 989221000006110  
11 1119161000000115  
12 1545591000006112  
13 1548401000006112  
14 1549761000006110  
15 1729331000006116  
16 1786921000006116  
17 1848121000006110  
18 2144741000000111  
19 2168741000000113  
20 2210381000000117  
21 2234371000000119  
22 2234411000000115  
23 2234541000000115  
24 2238261000000112  
25 2238301000000119  
26 2238341000000116  
27 2488341000000112  
28 2488381000000116  
29 2608401000000118  
30 2730141000006117  
31 2751261000006119  
32 2765831000006118  
33 2784341000006116  
34 2784351000006119  
35 2837981000006113  
36 2838001000006118  
37 2856061000006119  
38 2892651000006119  
39 3123551000006116  
40 3215871000006116  
41 3244261000006119  
42 3308951000006115  
43 3331521000006116  
44 3345371000006113  
45 3414341000006115  
46 3414351000006118  
47 3439701000006113  
48 3439711000006111  
49 3462921000006119  
50 3553621000006119  
51 3614311000006116  
52 3648381000006112  
53  
54  
55  
56  
57  
58  
59  
60

For peer review only

1 3648391000006110  
2 3745871000006116  
3 3756351000006111  
4 3767281000006116  
5 3865591000006112  
6 3870981000006117  
7 3918361000006110  
8 3932731000006114  
9 3962581000006110  
10 3978101000006118  
11 4056781000006117  
12 4056971000006118  
13 4056981000006115  
14 4059051000006119  
15 4374441000006113  
16 4403261000006113  
17 4540551000006119  
18 4785671000006113  
19 5011651000006111  
20 5011661000006113  
21 5014411000006111  
22 5014421000006115  
23 5049421000006111  
24 5049471000006112  
25 5050621000006118  
26 5051301000006111  
27 5057591000006116  
28 5057621000006119  
29 5057651000006111  
30 5057661000006113  
31 5059251000006117  
32 5059271000006110  
33 5059301000006112  
34 5059321000006119  
35 5233761000006119  
36 5477661000006119  
37 5560171000006116  
38 5593331000006113  
39 5593341000006115  
40 5653441000006111  
41 5836921000006114  
42 5836951000006117  
43 5886741000006110  
44 5912511000006114  
45 5992311000006119  
46 6018491000006111  
47 6018501000006115  
48 6348261000006111  
49 6348271000006116  
50 6348281000006118

For peer review only

1  
2 6348291000006115  
3 6601121000006118  
4 6601131000006115  
5 6694741000006111  
6 6694751000006113  
7 6694761000006110  
8 6694771000006115  
9 7070211000006112  
10 7078581000006116  
11 7078591000006118  
12 7078601000006114  
13 7095381000006112  
14 7098321000006117  
15 7218941000006118  
16 7273741000006119  
17 7598991000006116  
18 7599001000006116  
19 7609581000006110  
20 7617181000006110  
21 7699481000006113  
22 7848701000006116  
23 7966351000006118  
24 7967281000006119  
25 8041571000006119  
26 8041581000006116  
27 8041601000006114  
28 8042101000006112  
29 8042511000006119  
30 8044851000006112  
31 8361011000006114  
32 8361031000006115  
33 9652981000006114  
34 12027691000006119  
35 12107671000006115  
36 12107691000006119  
37 12122311000006110  
38 12126121000006117  
39 12126161000006111  
40 12126841000006116  
41 12127261000006118  
42 12127301000006110  
43 13949481000006113  
44 14164461000006112  
45 14164481000006119  
46 14194181000006111  
47 14194871000006117  
48 1705016  
49 22613011  
50 39767019  
51 89332015

For peer review only

1  
2 100438013  
3 104563015  
4 111625010  
5 145328019  
6 145620019  
7 251691013  
8 256451015  
9 294491014  
10 297013012  
11 299570018  
12 299572014  
13 299573016  
14 299630018  
15 299633016  
16 299634010  
17 299636012  
18 299637015  
19 299723016  
20 299750014  
21 299776014  
22 299800012  
23 299804015  
24 299805019  
25 299834013  
26 299835014  
27 299848013  
28 299851018  
29 299853015  
30 300374018  
31 300379011  
32 300401011  
33 300402016  
34 300403014  
35 300418010  
36 300419019  
37 300436010  
38 300510018  
39 300514010  
40 300515011  
41 300861019  
42 300867015  
43 300876010  
44 300879015  
45 300884014  
46 300886011  
47 300932016  
48 300944018  
49 300963017  
50 304524013  
51 304537011  
52  
53  
54  
55  
56  
57  
58  
59  
60

For peer review only

1  
2 313444015  
3 350535018  
4 355548016  
5 355549012  
6 377172018  
7  
8 395756011  
9 395791015  
10 397829016  
11 400805012  
12 411904010  
13 451368019  
14 451372015  
15 451376017  
16 459488019  
17 459859010  
18 477999016  
19 2534664018  
20 2534674015  
21 2536393012  
22 2537480011  
23 2675255018  
24 39111000006114  
25 52981000006112  
26 149701000006118  
27 161591000006114  
28 223951000000112  
29 235911000006116  
30 370711000006115  
31 371021000006118  
32 394541000006112  
33 407291000006117  
34 410751000006118  
35 417171000006111  
36 424291000006117  
37 426481000006114  
38 480631000006119  
39 496981000006113  
40 496991000006111  
41 585631000000113  
42 634751000006116  
43 635641000006111  
44 800691000006113  
45 818521000006112  
46 883951000006115  
47 883981000006111  
48 884101000006118  
49 884161000006117  
50 884181000006110  
51 884201000006111  
52 884211000006114

For peer review only

1 884611000006112  
2 884621000006116  
3 905361000006110  
4 905441000006115  
5 906771000006113  
6 908791000006113  
7 968201000006114  
8 989111000006113  
9 1130181000000113  
10 1539331000006118  
11 1823891000006113  
12 1895641000006114  
13 2115181000000110  
14 2504421000006117  
15 2709711000006116  
16 2941981000006112  
17 3013481000006111  
18 3182531000006110  
19 3268641000006118  
20 3302691000006119  
21 3302731000006110  
22 3371381000006110  
23 3371411000006113  
24 3371421000006117  
25 3522701000006112  
26 4776031000006115  
27 4777241000006117  
28 4778311000006112  
29 5011861000006114  
30 5057981000006111  
31 5496991000006110  
32 5974561000006110  
33 6633851000006110  
34 6841231000006113  
35 6841391000006118  
36 6847761000006118  
37 6860251000006115  
38 6860261000006118  
39 6864781000006110  
40 7084801000006112  
41 7475721000006114  
42 7482951000006115  
43 7573181000006118  
44 7573211000006119  
45 7703511000006110  
46 8015271000006112  
47 8026081000006119  
48 12321891000006112  
49 13944851000006115  
50 14015031000006119

For peer review only

1  
2 14196331000006118  
3 22613011  
4 76377011  
5 77703015  
6 80189019  
7  
8 313400018  
9 313403016  
10 313423015  
11 313424014  
12 313427019  
13  
14 313439010  
15 313444015  
16 313448017  
17 315680013  
18 315686019  
19 316833010  
20 355549012  
21 377170014  
22 377172018  
23 377798017  
24 400805012  
25 400815018  
26 3527478013  
27 371771000006115  
28 580911000006114  
29 580921000006118  
30 580931000006115  
31 580941000006113  
32 580951000006110  
33 580961000006112  
34 580971000006117  
35 581261000006110  
36 582721000006116  
37 583181000006114  
38 583791000006113  
39 637121000000110  
40 905361000006110  
41 905441000006115  
42 968201000006114  
43 1547441000006113  
44 2709701000006119  
45 2709711000006116  
46 3268641000006118  
47 3285001000006119  
48 3339391000006110  
49 3371411000006113  
50 4824961000006118  
51 5327651000006111  
52 7475721000006114  
53 12126011000006114  
54  
55  
56  
57  
58  
59  
60

For peer review only



1  
2 12321891000006112  
3 18472010  
4 70653017  
5 94251011  
6 139475013  
7 139482012  
8 147247018  
9 206703015  
10 251680018  
11 299673010  
12 300179017  
13 300180019  
14 300217019  
15 305601017  
16 317955011  
17 324974014  
18 324975010  
19 325061011  
20 350484012  
21 395772015  
22 412678013  
23 451426015  
24 453099015  
25 493287011  
26 510016018  
27 1488804017  
28 2549208013  
29 2675255018  
30 223981000000118  
31 504901000006118  
32 504911000006115  
33 728671000006119  
34 728681000006116  
35 741681000006111  
36 741691000006114  
37 741701000006114  
38 789941000006117  
39 905391000006119  
40 1647701000000118  
41 1661371000000112  
42 1747691000006119  
43 2227501000000110  
44 2352391000000117  
45 2504341000006116  
46 2585431000006117  
47 2660881000006116  
48 2664351000006113  
49 3182541000006117  
50 3182551000006115  
51 3182561000006118

For peer review only

1  
2 3213831000006118  
3 3244761000006113  
4 3283871000006117  
5 3489281000006119  
6 3589241000006116  
7 3868341000006118  
8 3886041000006118  
9 3886061000006119  
10 4193361000006119  
11 4540521000006111  
12 6043761000006113  
13 6204381000006117  
14 6914191000006115  
15 6919191000006119  
16 7025691000006110  
17 7052811000006113  
18 7056281000006118  
19 7250571000006113  
20 7251291000006119  
21 7321121000006119  
22 7507301000006110  
23 7510341000006110  
24 7573171000006116  
25 7573181000006118  
26 7573191000006115  
27 7573201000006117  
28 7573211000006119  
29 8011111000006111  
30 8030311000006111  
31 8048061000006111  
32 13910671000006110  
33 13971301000006111  
34 14015051000006114  
35  
36  
37  
38  
39  
40  
41  
42  
43  
44  
45  
46  
47  
48  
49  
50  
51  
52  
53  
54  
55  
56  
57  
58  
59  
60

For peer review only

1 Term  
2  
3 Congenital retinal aneurysm  
4 Repair of aneurysm of coronary artery  
5 Congenital cerebral arteriovenous aneurysm  
6 Aneurysm of conjunctiva  
7 Aneurysm of iliac artery  
8 Ruptured abdominal aortic aneurysm  
9 Congenital aneurysm of aorta  
10 Aneurysm of internal carotid artery  
11 Aneurysm of hepatic artery  
12 Aneurysm of renal artery  
13 Aneurysm of subclavian artery  
14 Aneurysm of axillary artery  
15 Aneurysm of popliteal artery  
16 Coronary artery aneurysm  
17 Aneurysm of external carotid artery  
18 Aneurysm of heart  
19 Aneurysm of superior mesenteric artery  
20 Aortic aneurysm  
21 Aneurysm of splenic artery  
22 Thoracic aortic aneurysm without mention of rupture  
23 Aneurysm of femoral artery  
24 Aneurysm of coeliac artery  
25 H/O: aortic aneurysm  
26 O/E - arterial wall - aneurysm  
27 O/E - retinal microaneurysms  
28 Replacement of aneurysmal bifurcation of aorta NOS  
29 Emergency replacement of aneurysmal segment of aorta  
30 Emergency repair of aortic aneurysm  
31 Emergency replacement of aneurysmal segment of aorta NOS  
32 Other replacement of aneurysmal segment of aorta NOS  
33 Operation on aneurysm of aorta NEC  
34 Operation on aneurysm of carotid artery  
35 Excision of aneurysm of cerebral artery  
36 Excision of aneurysm of circle of Willis  
37 Clipping of aneurysm of circle of Willis  
38 Ligation of aneurysm of cerebral artery NEC  
39 Ligation of aneurysm of circle of Willis NEC  
40 Obliteration of aneurysm of cerebral artery  
41 Obliteration of aneurysm of circle of Willis  
42 Operation on aneurysm of subclavian artery  
43 Operation on aneurysm of axillary artery  
44 Operation on aneurysm of brachial artery  
45 Operation on aneurysm of vertebral artery  
46 Operation on aneurysm of renal artery  
47 Operation on aneurysm of coeliac artery NEC  
48 Operation on aneurysm of superior mesenteric artery NEC  
49 Operation on aneurysm of suprarenal artery NEC  
50 Other specified replacement of aneurysmal iliac artery  
51 Replacement of aneurysmal iliac artery NOS  
52  
53  
54  
55  
56  
57  
58  
59  
60

1  
2 Operation on aneurysm of iliac artery NEC  
3 Ligation of aneurysm of popliteal artery  
4 Operation on aneurysm of femoral artery NEC  
5 Operation on aneurysm of artery NEC  
6 Rupture of syphilitic cerebral aneurysm  
7 Retinal microaneurysm  
8 Aneurysm of heart NOS  
9 Pulmonary artery aneurysm  
10 Aneurysm of pulmonary artery  
11 Ruptured berry aneurysm  
12 Nonruptured cerebral aneurysm due to dissection of cerebral artery  
13 Thoracic aortic aneurysm which has ruptured  
14 Ruptured thoracic aortic aneurysm  
15 Abdominal aortic aneurysm  
16 AAA - Abdominal aortic aneurysm without mention of rupture  
17 Ruptured aortic aneurysm  
18 Thoracoabdominal aortic aneurysm, ruptured  
19 Aortic aneurysm without mention of rupture NOS  
20 Thoracoabdominal aortic aneurysm  
21 Leaking abdominal aortic aneurysm  
22 Aortic aneurysm NOS  
23 Aneurysm  
24 Aneurysm of brachial artery  
25 Aneurysm of radial artery  
26 Aneurysm of ulnar artery  
27 Aneurysm of arm artery NOS  
28 Aneurysm of common iliac artery  
29 Aneurysm of external iliac artery  
30 Aneurysm of internal iliac artery  
31 Aneurysm of iliac artery NOS  
32 Aneurysm of anterior tibial artery  
33 Aneurysm of dorsalis pedis artery  
34 Aneurysm of posterior tibial artery  
35 Aneurysm of leg artery NOS  
36 Aneurysm of other artery  
37 Aneurysm of neck artery NOS  
38 Aneurysm of inferior mesenteric artery  
39 Aneurysm of other visceral artery  
40 Other aneurysm NOS  
41 Aneurysm NOS  
42 [X]Aortic aneurysm of unspecified site, ruptured  
43 [X]Aortic aneurysm of unspecified site, nonruptured  
44 Arterial aneurysm  
45 [X]Aneurysm of aorta in diseases classified elsewhere  
46 Congenital coronary aneurysm  
47 Congenital aneurysm of heart  
48 Congenital brain aneurysm NEC  
49 Congenital aneurysm NEC  
50 Emergency replacement of aneurysmal popliteal artery  
51 Emergency replacement of aneurysmal deep femoral artery

1  
2 Emergency replacement of aneurysmal common femoral artery  
3 Aortic aneurysm repair  
4 Y graft of abdominal aortic aneurysm - emergency  
5 Tube graft of Abdominal aortic aneurysm  
6 Tube graft abdominal aortic aneurysm - emergency  
7 Replacement of aneurysmal iliac artery by anastomosis  
8 Cirroid aneurysm  
9 Congenital renal artery aneurysm  
10 Acquired renal artery aneurysm  
11 Retinal macroaneurysm  
12 Other replacement of aneurysmal segment of aorta  
13 Replacement of aneurysmal iliac artery  
14 Other replacement of aneurysmal femoral artery  
15 Other cardiac wall aneurysm  
16 Congenital peripheral aneurysm  
17 Y graft abdominal Aortic aneurysm  
18 Other replacement of aneurysmal superficial femoral artery  
19 Other replacement of aneurysmal common femoral artery  
20 Other replacement of aneurysmal deep femoral artery  
21 Repair of aneurysm with graft of popliteal artery  
22 Mural cardiac aneurysm  
23 Vertebral artery aneurysm  
24 Ruptured popliteal artery aneurysm  
25 Ruptured suprarenal aortic aneurysm  
26 Juxtarenal aortic aneurysm  
27 Inflammatory abdominal aortic aneurysm  
28 Syphilitic aortic aneurysm  
29 Aneurysm of leg artery  
30 Aneurysm of artery of arm  
31 Clipping of aneurysm of cerebral artery  
32 Abdominal aortic aneurysm which has ruptured  
33 Cerebral aneurysm, nonruptured  
34 Cardiac aneurysm  
35 Ventricular cardiac aneurysm  
36 Percutaneous coil embolisation of cerebral artery aneurysm  
37 FH: Aortic aneurysm  
38 Dissecting aortic aneurysm  
39 Aneurysm of suprarenal aorta  
40 Repair of right ventricular aneurysm  
41 Repair of left ventricular aneurysm  
42 Non-ruptured acquired cerebral aneurysm  
43 Aneurysm of basilar artery  
44 Other replacement aneurysmal femoral artery by anastomosis  
45 Other replacement of aneurysmal femoral/popliteal artery NOS  
46 Other replacement of aneurysmal femoral/popliteal artery OS  
47 Other replacement of aneurysmal segment of aorta OS  
48 Operation on cerebral artery/ circle of Willis aneurysm NOS  
49 Operation on cerebral artery/ circle of Willis aneurysm OS  
50 Operation on aneurysm visceral branch of abdominal aorta NEC  
51 Replace aneurysm abdominal aorta by anast aorta to aorta NEC  
52  
53  
54  
55  
56  
57  
58  
59  
60

- 1
- 2 Replace aneurysm ascend aorta by anast of aorta/aorta NEC
- 3 Replacement of aneurysmal bifurcation of aorta by anastomosis of aorta to femoral artery
- 4 Replacement of aneurysmal bifurcation of aorta by anastomosis of aorta to iliac artery
- 5 Replace aneurysm com iliac a by aorta/com iliac a anast NEC
- 6 Replace aneurysm fem art by fem/peron art anast c prosth NEC
- 7 Replace aneurysm fem art by fem/pop a anast c vein graft NEC
- 8 Replace aneurysm fem art by fem/pop art anastom c prosth NEC
- 9 Replace aneurysm fem art by fem/tib a anast c vein graft NEC
- 10 Replace aneurysm fem art by fem/tib art anast c prosth NEC
- 11 Replace aneurysm fem artery by fem/fem art anastomosis NEC
- 12 Replace aneurysm iliac art by aorta/ext iliac art anast NEC
- 13 Replace aneurysm iliac artery by iliac/iliac art anast NEC
- 14 Replace aneurysm leg artery by aorta/com fem art anast NEC
- 15 Replace aneurysm leg artery by aorta/sup fem art anast NEC
- 16 Replace aneurysm pop art by pop/peron art anast c prosth NEC
- 17 Replace aneurysm pop art by pop/pop a anast c vein graft NEC
- 18 Replace aneurysm pop art by pop/pop art anastom c prosth NEC
- 19 Replace aneurysm pop art by pop/tib a anast c vein graft NEC
- 20 Replace aneurysm pop art by pop/tib art anast c prosth NEC
- 21 Replace aneurysm popliteal artery by pop/fem anastomosis NEC
- 22 Replace aneurysm thoracic aorta by anast of aorta/aorta NEC
- 23 Replace aneurysmal iliac art by iliac/femoral art anast NEC
- 24 Replace aneurysmal iliac artery by fem/fem artery anast NEC
- 25 Replacement of aneurysmal bifurcation of aorta
- 26 Replacement of aneurysmal bifurcation of aorta OS
- 27 Pulmonary arterio-venous aneurysm
- 28 Peripheral arterio-venous aneurysm
- 29 Transluminal operations on aneurysmal segment of aorta
- 30 Repair of thoracic aortic aneurysm with insertion of endovascular stent
- 31 Embolisation of aneurysm using transluminal coil
- 32 Endovascular stenting of aorto-uniiliac aneurysm
- 33 Repair of suprarenal abdominal aortic aneurysm with insertion of endovascular stent
- 34 Other transluminal embolisation of aneurysm
- 35 Other specified transluminal coil embolisation of aneurysm
- 36 Balloon assisted embolisation of aneurysm using transluminal coil
- 37 Transluminal coil embolisation of aneurysm NOS
- 38 Other specified other transluminal embolisation of aneurysm
- 39 Transluminal operations on aneurysmal segment of aorta NOS
- 40 Stent assisted embolisation of aneurysm using transluminal coil
- 41 Other transluminal embolisation of aneurysm NOS
- 42 Aneurysm of common carotid art
- 43 Aneurysm of sinus of Valsalva
- 44 Abdominal aortic aneurysm stenting
- 45 Endovascular stenting for aorto-uniiliac aneurysm
- 46 Aortic aneurysm - syphilitic
- 47 Operations on aneurysm of cerebral artery or circle of Willis
- 48 Cerebral artery aneurysm operations
- 49 Circle of Willis aneurysm operations
- 50 Emergency replacement of aneurysmal bifurcation of aorta by anastomosis of aorta to femoral artery
- 51 Emergency replacement of aneurysmal bifurcation of aorta by anastomosis of aorta to iliac artery
- 52
- 53
- 54
- 55
- 56
- 57
- 58
- 59
- 60

1  
2 Emergency replacement of aneurysmal common iliac artery by anastomosis of aorta to common iliac artery  
3 Emergency replacement of aneurysmal iliac artery by anastomosis of aorta to external iliac artery  
4 Emergency replacement of aneurysmal popliteal artery by anastomosis of popliteal artery to popliteal artery u  
5 Emerg replace aneurysm abdom aorta by anast aorta/aorta NEC  
6 Emergency replacement of aneurysmal segment of ascending aorta by anastomosis of aorta to aorta  
7  
8 Emergency replacement of aneurysmal femoral artery by anastomosis of femoral artery to popliteal artery usi  
9 Emergency replacement of aneurysmal femoral artery by anastomosis of femoral artery to popliteal artery usi  
10 Emergency replacement of aneurysmal femoral artery by anastomosis of femoral artery to femoral artery  
11 Emergency replacement of aneurysmal femoral artery by anastomosis of femoral artery to tibial artery using p  
12  
13 Emergency replacement of aneurysmal iliac artery by anastomosis of iliac artery to femoral artery  
14 Emergency replacement of aneurysmal iliac artery by anastomosis of iliac artery to iliac artery  
15 Emergency replacement of aneurysmal segment of infrarenal abdominal aorta by anastomosis of aorta to aort  
16 Emergency replacement of aneurysmal artery of leg by anastomosis of aorta to common femoral artery  
17 Emergency replacement of aneurysmal artery of leg by anastomosis of aorta to superficial femoral artery  
18  
19 Emergency replacement of aneurysmal popliteal artery by anastomosis of popliteal artery to peroneal artery u  
20 Emergency replacement of aneurysmal popliteal artery by anastomosis of popliteal artery to popliteal artery u  
21 Emergency replacement of aneurysmal popliteal artery by anastomosis of popliteal artery to tibial artery using  
22 Emergency replacement of aneurysmal popliteal artery by anastomosis of popliteal artery to tibial artery using  
23  
24 Emergency replacement of aneurysmal popliteal artery by anastomosis of popliteal artery to femoral artery  
25  
26 Emergency replacement of aneurysmal segment of suprarenal abdominal aorta by anastomosis of aorta to aor  
27  
28 Emergency replacement of aneurysmal segment of thoracic aorta by anastomosis of aorta to aorta  
29  
30 Emergency replacement of aneurysmal iliac artery by anastomosis of femoral artery to femoral artery  
31  
32 Emergency replacement of aneurysmal femoral or popliteal artery by anastomosis  
33  
34 Emergency replacement aneurysmal femoral/popliteal art NOS  
35  
36 Emergency replacement aneurysmal femoral/popliteal artery OS  
37  
38 Emergency replacement of aneurysmal superficial femoral artery  
39  
40 Emergency replacement of aneurysmal femoral or popliteal artery  
41  
42 Emergency replacement of aneurysmal segment of aorta OS  
43  
44 Endovascular insertion of stent for thoracic aortic aneurysm  
45  
46 Endovascular insertion of stent for aorto-uniliac aneurysm  
47  
48 Ruptured heart aneurysm repair  
49  
50 Heart aneurysm excision  
51  
52 Aneurysmectomy  
53  
54 Aneurysmorrhaphy  
55  
56 Clipping - aneurysm  
57  
58 Aneurysm excision+reanastomos.  
59  
60 Cerebral aneurysm-non ruptured  
61  
62 Thoracic aortic aneurysm  
63  
64 Abdominal aortic aneurysm  
65  
66 [RFC] Aneurysms  
67  
68 Aneurysm excision+reanastomos.  
69  
70 Aneurysm excision+reanastomos.  
71  
72 Repair of aneurysm of sinus of Valsalva  
73  
74 Repair of infrarenal abdominal aortic aneurysm with insertion of endovascular stent  
75  
76 OS transluminal operations on aneurysmal segment of aorta  
77  
78 Percutaneous transluminal coil embolisation of small aneurysm  
79  
80 Percutaneous transluminal coil embolisation of medium aneurysm  
81  
82 Percutaneous transluminal coil embolisation of large aneurysm  
83  
84 Percutaneous transluminal coil embolisation of giant aneurysm  
85  
86 Perc translum ball assist coil embolisat three more aneurysm

1 Perc translum balloon assist coil embolis two aneurysms  
2 Perc translum balloon assist coil embolisat single aneurysm  
3 OS transluminal balloon assisted coil embolisation aneurysm  
4 Transluminal balloon assisted coil embolisation aneurysm NOS  
5 Perc translumin stent assis coil embolis three more aneurysm  
6 Perc translum stent assisted coil embolisation two aneurysms  
7 Percutaneous transluminal stent assisted coil embolisation of aneurysm  
8 OS transluminal stent assisted coil embolisation of aneurysm  
9 Transluminal stent assisted coil embolisation aneurysm NOS  
10 Percutaneous transluminal embolisation of aneurysm using liquid polymer  
11 Stent assisted percutaneous transluminal embolisation of aneurysm using liquid polymer  
12 Transluminal insertion of stent graft for aneurysmal segment of aorta  
13 Repair of aorto-uniliac aneurysm with insertion of endovascular stent graft  
14 Endovascular insertion of stent graft for suprarenal aortic aneurysm  
15 Repair of thoracic aortic aneurysm with insertion of endovascular stent graft  
16 Endovas insertion of stent graft for aorto-uniliac aneurysm  
17 OS translum ins stent graft for aneurysmal segment of aorta  
18 Translum ins stent graft for aneurysmal segment of aorta NOS  
19 Endovascular insertion of stent for infrarenal abdominal aortic aneurysm  
20 Endovascular insertion of stent for suprarenal aortic aneurysm  
21 Endovas insert stent for aortic aneurysm of bifurcation NEC  
22 Infrarenal abdominal aortic aneurysm  
23 Aneurysm of infrarenal abdominal aorta  
24 Retinal macroaneurysm  
25 Aortic aneurysm monitoring  
26 Hered angiopathy with nephropathy, aneurysms + muscle cramp synd  
27 Hereditary angiopathy with nephropathy, aneurysms and muscle cramps syndrome  
28 NHS abdominal aortic aneurysm screening programme initial screening shows abdominal aortic aneurysm, pla  
29 NHS abdominal aortic aneurysm screening programme initial screening shows large abdominal aortic aneurysr  
30 Aneurysm of vein of transplanted kidney  
31 Aneurysm of artery of transplanted kidney  
32 Repair of aneurysm of coronary artery  
33 Repair of coronary artery aneurysm  
34 Aneurysm of common carotid artery  
35 Racemose aneurysm  
36 Repair of thoracic aortic aneurysm  
37 Aneurysm of artery of lower extremity  
38 Aneurysm of lower limb artery  
39 Internal carotid aneurysm  
40 Diabetic retinal microaneurysm  
41 Hepatic artery aneurysm  
42 Aneurysm of gastroduodenal artery  
43 Retinal microaneurysms  
44 Nonruptured cerebral aneurysm  
45 Unruptured cerebral aneurysm  
46 Repair of aneurysm by endovascular coil embolisation  
47 Ligation of aneurysm  
48 Popliteal artery aneurysm  
49 Aneurysm of coronary vessels  
50 Mycotic aneurysm



1 Congenital aneurysm of sinus of Valsalva  
2 Sinus of Valsalva aneurysm  
3 Traumatic arterial aneurysm  
4 Aneurysm of aorta  
5 Repair of aneurysm with graft of radial artery  
6 Splenic artery aneurysm  
7 Thoracic aortic aneurysm without rupture  
8 Repair of aneurysm  
9 Abdominal aortic aneurysm without rupture  
10 Intracerebral aneurysm clipped  
11 Fusiform aneurysm  
12 Aneurysm  
13 Aneurysmal dilatation  
14 Microaneurysm  
15 Ventricular aneurysm  
16 Atrial septal aneurysm  
17 Coeliac artery aneurysm  
18 Aneurysmectomy  
19 Thrombosed aneurysm  
20 Multiple aneurysms  
21 Cerebral arterial aneurysm  
22 Intracranial aneurysm  
23 Repair of aortic aneurysm using bifurcation graft  
24 AAA - Repair of abdominal aortic aneurysm using bifurcation graft  
25 Brachial artery aneurysm  
26 Radial artery aneurysm  
27 Ulnar artery aneurysm  
28 Common iliac aneurysm  
29 External iliac aneurysm  
30 Internal iliac aneurysm  
31 Anterior tibial aneurysm  
32 Posterior tibial aneurysm  
33 Inferior mesenteric aneurysm  
34 Subarachnoid haemorrhage due to ruptured aneurysm  
35 Intracranial aneurysm operation  
36 Clipping of intracranial aneurysm  
37 Embolisation of intracranial aneurysm  
38 Repair of aortic aneurysm using straight graft  
39 AAA - Repair of abdominal aortic aneurysm using straight graft  
40 Ruptured cerebral aneurysm  
41 AAA - Abdominal aortic aneurysm  
42 Carotid artery aneurysm  
43 Mycotic aneurysm  
44 Aneurysm of vein  
45 Aneurysmal  
46 Aneurysm of membranous septum  
47 Aneurysm clipping  
48 Unruptured aneurysm of middle cerebral artery  
49 Unruptured aneurysm of anterior communicating artery  
50 Unruptured aneurysm of posterior communicating artery

- 1 Unruptured aneurysm of basilar artery
- 2 Unruptured aneurysm of carotid artery
- 3 Subarachnoid haemorrhage from middle cerebral artery aneurysm
- 4 Subarachnoid haemorrhage from anterior communicating artery aneurysm
- 5 Subarachnoid haemorrhage from posterior communicating artery aneurysm
- 6 Subarachnoid haemorrhage from basilar artery aneurysm
- 7 Subarachnoid haemorrhage from posterior inferior cerebellar artery aneurysm
- 8 Types of aneurysms
- 9 Berry aneurysm
- 10 Saccular aneurysm
- 11 Ruptured aneurysm of anterior cerebral artery
- 12 Ruptured aneurysm of middle cerebral artery
- 13 Ruptured aneurysm of basilar artery
- 14 Ruptured internal carotid-posterior communicating artery zone aneurysm
- 15 Congenital arterial aneurysm
- 16 Left ventricular aneurysm
- 17 Left ventricular wall aneurysmal
- 18 LVA - Left ventricular aneurysm
- 19 Aneurysm of head and neck artery
- 20 Repair of thoracoabdominal aortic aneurysm
- 21 Leber's miliary aneurysms
- 22 Aneurysm of aortic root
- 23 Femoro-proximal popliteal artery bypass for repair of aneurysm with vein
- 24 Repair of aneurysm of abdominal aorta
- 25 Repair of hepatic artery aneurysm
- 26 Enlarging abdominal aortic aneurysm
- 27 Aneurysm of ascending aorta
- 28 Aneurysm of descending aorta
- 29 Stent assisted embolization of aneurysm using transluminal coil
- 30 Embolization of aneurysm using transluminal coil
- 31 Repair of suprarenal aortic aneurysm with insertion of endovascular stent graft
- 32 Aneurysm of thoracic aorta
- 33 Percutaneous balloon assisted coil embolisation of cerebral aneurysm using fluoroscopic guidance
- 34 Endovascular repair of aneurysm of iliac artery
- 35 Repair of aneurysm of suprarenal abdominal aorta with insertion of endovascular stent
- 36 Endovascular repair of abdominal aortic aneurysm
- 37 Craniotomy and clipping of intracranial aneurysm
- 38 Elective repair of infrarenal abdominal aortic aneurysm
- 39 Aneurysm of descending thoracic aorta
- 40 Leaking thoracic aortic aneurysm
- 41 CT surveillance post-EVAR (endovascular aneurysm repair)
- 42 Aneurysm of right renal artery
- 43 Aneurysm of right common iliac artery
- 44 Aneurysm of left common iliac artery
- 45 Aneurysm of right internal iliac artery
- 46 Aneurysm of left internal iliac artery
- 47 Aneurysm of left popliteal artery
- 48 Repair of suprarenal abdominal aortic aneurysm with insertion of endovascular stent
- 49 Repair of abdominal aortic aneurysm with insertion of stent
- 50 Aneurysm of internal carotid bifurcation

1 Aneurysm of anterior cerebral artery  
2 Aneurysm of anterior communicating artery  
3 Aneurysm of middle cerebral artery  
4 Aneurysm of posterior communicating artery  
5 Macroaneurysm  
6 Microaneurysm of retinal artery  
7 CT of aortic aneurysm with contrast  
8 May-Thurner syndrome  
9 Thoracic outlet syndrome  
10 Thoracic outlet syndrome of right thoracic outlet  
11 Decompression of thoracic outlet by myotomy of scalenus anticus muscle  
12 Neurogenic thoracic outlet syndrome  
13 Decompression of thoracic outlet by tenotomy  
14 Arterial thoracic outlet syndrome due to cervical rib  
15 Fibromuscular hyperplasia of arteries NOS  
16 Arterial fibromuscular dysplasia  
17 Fibromuscular dysplasia of renal artery  
18 Fibromuscular dysplasia  
19 Fibromuscular hyperplasia of artery  
20 FMD - Fibromuscular dysplasia  
21 Fibromuscular dysplasia of wall of artery  
22 Fibromuscular hyperplasia of artery  
23 Fibromuscular dysplasia of wall of renal artery  
24 Klippel Trenaunay syndrome  
25 Chronic acquired lymphedema  
26 Lymphedema  
27 Hereditary lymphedema  
28 Lymphedema of upper limb  
29 Lymphedema of bilateral lower limbs  
30 Orthostatic hypotension  
31 Postural hypotension  
32 Hypotension  
33 Chronic hypotension  
34 Idiopathic hypotension  
35 Hypotension NOS  
36 [X]Other hypotension  
37 Hypotensive therapy  
38 Chronic hypotension-idiopathic  
39 Idiopathic intracranial hypotension  
40 Hypotensive syncope  
41 Sympathotonic orthostatic hypotension  
42 Syncope due to orthostatic hypotension  
43 Refractory hypotension  
44 Intracranial hypotension  
45 Purpura annularis telangiectodes  
46 Retinal telangiectasia  
47 Cutis marmorata telangiectasia congenita  
48 Telangiectasia disorder  
49 Hereditary haemorrhagic telangiectasia  
50 Macular telangiectasia

- 1
- 2 Acne rosacea, erythematous telangiectatic type
- 3 Osler haemorrhagic telangiectasia syndrome
- 4 HHT - Hereditary haemorrhagic telangiectasia
- 5 HHT - Hereditary hemorrhagic telangiectasia
- 6 Capillary telangiectasia
- 7
- 8 Purpura annularis telangiectodes of Majocchi
- 9 Telangiectasia of colon
- 10 Bladder telangiectasia
- 11 Telangiectasis
- 12 Telangiectasia
- 13 Spider telangiectasia
- 14 Parafoveal telangiectasia
- 15 Acquired peripheral telangiectasia
- 16 Telangiectasis of vocal fold
- 17 Generalised essential telangiectasia
- 18 Hereditary benign telangiectasia
- 19 Arborising telangiectasia
- 20 Solar telangiectasia
- 21 Cutis marmorata telangiectatica congenita
- 22 Idiopathic juxtafoveal telangiectasia
- 23 Telangiectasias of lid margin
- 24 Telangiectasia of skin of face
- 25 Venous telangiectases of the lower limb
- 26 Essential telangiectasia
- 27 Unilateral naevoid telangiectasia
- 28 Vasculitis
- 29 Nodular vasculitis
- 30 Cryoglobulinaemic vasculitis
- 31 Retinal vasculitis
- 32 [X]Vasculitis limited to skin, unspecified
- 33 Livedoid vasculitis
- 34 Rheumatoid vasculitis
- 35 Antineutrophil cytoplasmic antibody (ANCA) positive vasculitis
- 36 Vasculitis of the skin
- 37 Necrotising vasculitis
- 38 Vasculitic rash
- 39 Vasculitic eruption
- 40 Lymphocytic vasculitis of skin
- 41 Systemic vasculitis
- 42 Leukocytoclastic vasculitis
- 43 Allergic vasculitis
- 44 Hypersensitivity vasculitis
- 45 Leucocytoclastic vasculitis
- 46 Henoch-Schoenlein vasculitis
- 47 Neuropathy in vasculitis and connective tissue disease
- 48 Primary cutaneous vasculitis
- 49 Necrotising rheumatoid vasculitis
- 50 Lupus vasculitis
- 51 Hypocomplementaemic urticarial vasculitis
- 52 Urticarial vasculitis
- 53
- 54
- 55
- 56
- 57
- 58
- 59
- 60

1 Vasculitic neuropathy  
2 Cerebral vasculitis  
3 H/O vasculitis  
4 Large vessel vasculitis  
5 Small vessel vasculitis  
6 Medium vessel vasculitis  
7 ANCA (anti neutrophil cytoplasmic antibody) associated vasculitis  
8 Left retinal vasculitis  
9 Bilateral retinal vasculitis  
10 Immunoglobulin A vasculitis  
11 Postinfective immunoglobulin A vasculitis  
12 Intermittent claudication  
13 Claudication distance  
14 Claudication  
15 Neurogenic claudication  
16 Vascular claudication  
17 IC - Intermittent claudication  
18 Venous intermittent claudication  
19 Venous claudication  
20 H/O intermittent claudication  
21 H/O: varicose veins  
22 O/E - varicose veins  
23 Ligation of recurrent varicose vein of leg  
24 Other specified ligation of varicose vein of leg  
25 Ligation of varicose vein of leg NOS  
26 Injection of varicose vein of lower limb  
27 Injection sclerotherapy of varicose vein of lower limb  
28 Other specified injection into varicose vein of leg  
29 Injection into varicose vein of leg NOS  
30 Other operations on varicose vein of leg  
31 Local excision of varicose vein of leg  
32 Incision of varicose vein of lower limb  
33 Other specified other operation on varicose vein of leg  
34 Varicose vein operation  
35 Varicose vein operation planned  
36 Varicose veins of the leg with ulcer  
37 Varicose veins of the leg with ulcer and eczema  
38 Varicose veins of the leg with rupture  
39 Varicose veins of lower extremity  
40 Infected varicose ulcer  
41 Varicose veins of the leg NOS  
42 Other specified varicose veins  
43 Varicose veins  
44 [X]Varicose veins of other specified sites  
45 Varicose veins of leg with long saphenous vein distribution  
46 Varicose veins of leg with short saphenous vein distribution  
47 Varicose veins - obstetric  
48 Vulval obstetric varicose veins  
49 Perineal obstetric varicose veins  
50 Ligation of perforating varicose vein of leg

1 Stripping of lower limb varicose veins  
2 Avulsion of varicose vein of leg  
3 Varicose veins of the leg with eczema  
4 Varicose veins of legs in the puerperium  
5 Varicose vein of leg with phlebitis  
6 Varicose eczema  
7 Ligation of varicose vein of leg  
8 VV - Varicose veins of leg  
9 Subfascial ligation of varicose veins  
10 Endovascular radiofrequency ablation of varicose vein of leg  
11 Endovascular laser ablation of varicose vein of leg  
12 Transluminal operations on varicose vein of leg  
13 Combined operations on varicose vein of leg  
14 Transilluminated powered phlebectomy for varicose vein of leg  
15 Combined operations on varicose vein of leg NOS  
16 Other specified transluminal operations on varicose vein leg  
17 Other specified combined operations on varicose vein of leg  
18 Transluminal operations on varicose vein of leg NOS  
19 Babcock subcutaneous enucleation of varicose veins  
20 Cockett subfascial ligation of perforating varicose vein  
21 Mayo stripping of varicose vein  
22 Linton ligation of perforating varicose vein of leg  
23 Varicose vein ligation  
24 Varicose vein ligate + strip  
25 Varicose vein stripping  
26 Varicose vein ligation/strip  
27 Varicose vein op. NOS  
28 Varicose veins of legs  
29 Varicose ulcer of leg  
30 Varicose eczema - leg  
31 Varicose ulcer + inflammation  
32 Ruptured varicose veins  
33 Simple varicose veins  
34 Varicose veins NOS  
35 Varicose veins NOS  
36 Varicose veins,legs - obst.  
37 Vulval/perineal varicose veins  
38 [RFC] Varicose veins  
39 [RFC] Varicose eczema  
40 [RFC] Varicose eczema  
41 Varicose vein stripping  
42 Varicose ulcer of leg  
43 Simple varicose veins  
44 Varicose veins NOS  
45 Ultrasound guided foam sclerotherapy for varicose vein of leg  
46 Injection of sclerosing substance into varicose vein leg NEC  
47 Endovenous radiofrequency obliteration of varicose vein of lower limb  
48 Percutaneous transluminal laser ablation of varicose vein of lower limb  
49 Excision of varicose vein  
50 Varicose phlebectomy

1 Injection of sclerosing agent in varicose vein  
2 Sclerotherapy of varicose vein  
3 Varicose vein  
4 Ligation of varicose vein of lower limb  
5 Local ligation of varicose vein of leg  
6 Varicose veins of lower extremity with ulcer AND inflammation  
7 Varicose veins of lower limb  
8 Ligation of varicose vein  
9 Ruptured varicose vein of leg  
10 Bleeding varicose vein of leg  
11 Avulsion of varicose vein  
12 Multiple avulsions of varicose veins  
13 Calf perforator varicose veins  
14 Varicose  
15 Simple varicose veins  
16 Ruptured varicose veins  
17 Bleeding varicose veins  
18 Varicose eczema leg  
19 Varicose vein ligation and stripping  
20 Varicose ulcer and inflammation  
21 Varicose ulcer of lower extremity  
22 High ligation and local ligation of varicose veins  
23 Varicose veins with ulcer of lower extremity  
24 Varicose veins of leg in long saphenous vein distribution with eczema  
25 Varicose veins of leg in short saphenous vein distribution with eczema  
26 Varicose veins of leg in short saphenous vein distribution with ulcer  
27 Excision of varicose vein of lower limb  
28 Endoscopic transilluminated excision of varicose vein of leg  
29 Endovenous laser ablation of varicose vein  
30 Recurrent varicose vein of lower leg  
31 Recurrent varicose vein of lower limb  
32 Injection of varicose vein of lower leg  
33 Injection sclerotherapy of varicose vein of lower leg  
34 High ligation and stripping of long saphenous vein and multiple avulsions of varicose veins  
35 Pain due to varicose veins of leg  
36 Endovenous laser ablation of varicose vein of lower limb  
37 Ultrasound guided injection of glue to varicose vein of lower limb  
38 Endovascular laser ablation of varicose vein of leg  
39 Other operations for venous insufficiency  
40 Other specified other operation for venous insufficiency  
41 Other operation for venous insufficiency NOS  
42 Chronic venous insufficiency  
43 Peripheral venous insufficiency  
44 Venous insufficiency of leg  
45 Venous insufficiency of lower limb  
46 Primary venous insufficiency of leg  
47 Secondary venous insufficiency of leg  
48 Lymphoedema of limbs due to immobility, chronic dependency and/or venous insufficiency  
49 Ulcer of limb due to chronic venous insufficiency  
50 Lymphoedema due to venous insufficiency

1  
2 Vertebral artery dissection  
3 Carotid artery dissection  
4 Left carotid artery dissection  
5 Right vertebral artery dissection  
6 Left vertebral artery dissection  
7  
8 [M]Carotid body tumour  
9 [M]Aortic body tumour  
10 Carotid body tumour  
11 Aortic body tumour  
12 Excision of carotid body tumour  
13  
14 Cerebellar stroke syndrome  
15 Admission to stroke unit  
16 H/O: Stroke in last year  
17 Occlusive stroke  
18 [V]Personal history of stroke  
19 Referral to stroke clinic  
20  
21 H/O: stroke  
22 Haemorrhagic stroke monitoring  
23 Left hemispheric cerebellar artery embolism with stroke  
24 PASS (Postural Assessment Scale for Stroke Patients) score  
25 Exception reporting - stroke quality indicators  
26 Excepted from stroke quality indicators - patient unsuitable  
27 Excepted from stroke quality indicators - informed dissent  
28 Sequelae of stroke,not specfd as h'morrhage or infarction  
29 Did not attend stroke clinic  
30 Seen in stroke clinic  
31 Delivery of rehabilitation for stroke  
32 [X]Sequelae of stroke,not specfd as h'morrhage or infarction  
33 Brainstem stroke syndrome  
34 [RFC] Stroke/CVA  
35 [RFC] Stroke  
36 [RFC] Stroke  
37  
38 MELAS - Mitochondrial encephalopathy, lactic acidosis and stroke-like episodes  
39 Referral to multidisciplinary stroke function improvement service  
40 Annual Stroke/CVA blood test  
41 Suspected stroke  
42 Suspected stroke  
43 Referral for multidisciplinary stroke function improvement declined  
44 Referral by stroke nurse specialist  
45 VTE risk assessment - acute stroke  
46 Referral to stroke rehabilitation service  
47 Referral to community stroke service  
48 Discharge from community stroke service  
49 Completed stroke  
50 Juvenile myopathy, encephalopathy, lactic acidosis AND stroke  
51 Brain stem stroke  
52 Nonparalytic stroke  
53 Total anterior cerebral circulation stroke  
54 TACS - Total anterior cerebral circulation stroke  
55 Partial anterior cerebral circulation stroke  
56



1 PACS - Partial anterior cerebral circulation stroke  
2 Posterior cerebral circulation stroke  
3 Anterior circulation stroke of uncertain pathology  
4 Posterior circulation stroke of uncertain pathology  
5 Spinal cord stroke  
6 Referral to stroke service  
7 Discharge from stroke service  
8 Seen by stroke service  
9 Thrombotic stroke  
10 Embolic stroke  
11 Neonatal stroke  
12 Basal ganglion stroke  
13 Cardioembolic stroke  
14 Ischaemic stroke  
15 Ischemic stroke  
16 Thalamic stroke  
17 Post stroke pain  
18 Cerebral ischaemic stroke due to small artery occlusion  
19 Epilepsy due to stroke  
20 Sequela of cardioembolic stroke  
21 DNA (did not attend) stroke clinic  
22 Ischaemic stroke without coma  
23 Did not attend stroke review  
24 Management of stroke rehabilitation  
25 Acute stroke care  
26 Haemorrhagic stroke  
27 Emergency hospital admission to stroke service  
28 Cerebellar stroke  
29 History of ischaemic stroke  
30 Cerebral ischaemic stroke due to dissection of artery  
31 Cerebral ischaemic stroke due to global hypoperfusion with watershed infarct  
32 Cerebral ischaemic stroke due to hypercoagulable state  
33 Cerebral ischaemic stroke co-occurrent with subarachnoid haemorrhage  
34 Cryptogenic stroke  
35 Acute stroke due to occlusion of left posterior cerebral artery  
36 Acute stroke of brainstem  
37 Acute ischaemic stroke  
38 Stroke monitoring  
39 Stroke in the puerperium  
40 Central post-stroke pain  
41 Stroke due to basilar artery thrombus  
42 Stroke due to thrombus of right middle cerebral artery  
43 Stroke due to thrombus of left middle cerebral artery  
44 Stroke care plan  
45 Stroke due to cerebral arterial occlusion  
46 Stroke unspecified  
47 Stroke/CVA - undefined  
48 Stroke  
49 Stroke monitoring administration  
50 Stroke monitoring invite 1

- 1
- 2 Stroke monitoring invite 2
- 3 Stroke monitoring invite 3
- 4 Stroke 6 month review
- 5 Mitoch myopath/encephalopath/lactic acidosis/stroke-like episode
- 6 Central post-stroke pain
- 7
- 8 Stroke self-management plan review
- 9 Stroke self-management plan agreed
- 10 Stroke annual review
- 11 Stroke initial post discharge review
- 12 Stroke rehabilitation
- 13
- 14 Stroke
- 15 Stroke of uncertain pathology
- 16 Stroke test positive
- 17 Stroke test negative
- 18 Stroke clinic
- 19
- 20 Stroke impact scale version 3.0
- 21 Stroke impact scale version 3.0 score
- 22 Stroke/cerebrovascular accident 6 month review
- 23 Stroke medicine
- 24
- 25 Cerebral infarct due to thrombosis of precerebral arteries
- 26 Cerebral infarction due to embolism of precerebral arteries
- 27 Cerebral infarction due to thrombosis of cerebral arteries
- 28 Cerebral infarction due to embolism of cerebral arteries
- 29 Sequelae of cerebral infarction
- 30 [X]Other cerebral infarction
- 31 Cerebral infarction
- 32 Left sided cerebral infarction
- 33 Right sided cerebral infarction
- 34
- 35 Occlusion and stenosis of cerebral arteries, not resulting in cerebral infarction
- 36 [X]Cerebrl infarctn due/unspcf occlusn or sten/cerebrl artr
- 37 Cerebral infarction due to cerebral venous thrombosis, non-pyogenic
- 38 Cerebral infarction due to occlusion of precerebral artery
- 39 Cerebrl infarctn due/unspcf occlusn or sten/cerebrl artr
- 40 Cerebral autosomal dominant arteriopathy with subcortical infarcts and leukoencephalopathy
- 41 Cerebral infarction with haemorrhagic transformation
- 42 Cause of Death- Cerebral Infarct
- 43
- 44 Surveillance of Cerebral Palsy in Europe classification - predominant pattern B.2 - sequelae of intraventricular I
- 45 Surveillance of Cerebral Palsy in Europe classification - predominant pattern C.3 - infarct of the middle cerebra
- 46
- 47 Old cerebral infarction on imaging
- 48 Cerebral infarction due to occlusion of cerebral artery
- 49 Cerebral infarction due to stenosis of cerebral artery
- 50
- 51 Anterior cerebral circulation infarction
- 52 Total anterior cerebral circulation infarction
- 53 TACI - Total anterior cerebral circulation infarction
- 54 Partial anterior cerebral circulation infarction
- 55 PACI - Partial anterior cerebral circulation infarction
- 56 Posterior cerebral circulation infarction
- 57 Haemorrhagic cerebral infarction
- 58 Anterior cerebral circulation haemorrhagic infarction
- 59
- 60 Posterior cerebral circulation haemorrhagic infarction

1 Occipital cerebral infarction  
2 Cerebral infarction due to embolism of middle cerebral artery  
3 Cerebral infarction due to thrombosis of middle cerebral artery  
4 Silent cerebral infarct  
5 Sequela of ischaemic cerebral infarction  
6 Cerebral degeneration in mucopolysaccharidoses  
7 Cerebrovascular accident  
8 [V]Personal history of cerebrovascular accident (CVA)  
9 Cerebrovascular accident due to thrombus of left carotid artery  
10 Cerebrovascular accident due to thrombus of basilar artery  
11 Cerebrovascular accident due to thrombus of right carotid artery  
12 Cerebrovascular accident due to thrombus of right middle cerebral artery  
13 Cerebrovascular accident due to thrombus of left middle cerebral artery  
14 Cerebrovascular accident due to occlusion of left pontine artery  
15 Cerebrovascular accident due to occlusion of right posterior cerebral artery  
16 Cerebrovascular accident due to occlusion of left middle cerebral artery  
17 Cerebrovascular accident due to occlusion of left posterior cerebral artery  
18 Cerebrovascular accident due to occlusion of right middle cerebral artery  
19 Cerebrovascular accident due to occlusion of right middle cerebral artery by embolus  
20 CVA - cerebrovascular accident due to cerebral artery occlusion  
21 CVA - cerebrovascular accident in the puerperium  
22 CVA - Cerebrovascular accident  
23 History of cerebrovascular accident  
24 Cerebrovascular accident care plan  
25 Left sided cerebral hemisphere cerebrovascular accident  
26 Right sided cerebral hemisphere cerebrovascular accident  
27 Extension of cerebrovascular accident  
28 Cerebrovascular accident annual review  
29 Cerebrovascular accident due to stenosis of bilateral carotid arteries  
30 History of embolic cerebrovascular accident  
31 History of cerebrovascular accident due to ischaemia  
32 Cerebrovascular accident due to occlusion of bilateral pontine arteries  
33 Acute cerebrovascular accident due to stenosis of left carotid artery  
34 Acute cerebrovascular accident due to occlusion of left middle cerebral artery  
35 Acute cerebrovascular accident due to occlusion of right posterior cerebral artery  
36 Acute cerebrovascular accident due to occlusion of right middle cerebral artery  
37 Acute cerebrovascular accident due to occlusion of right carotid artery  
38 Acute cerebrovascular accident due to occlusion of left carotid artery  
39 Acute cerebrovascular accident of basal ganglia  
40 Acute cerebrovascular accident of brainstem  
41 Acute cerebrovascular accident due to stenosis of right carotid artery  
42 Acute cerebrovascular accident due to occlusion of right cerebellar artery  
43 Acute cerebrovascular accident due to ischaemia  
44 Acute cerebrovascular accident due to occlusion of left cerebellar artery  
45 Acute cerebrovascular accident due to embolism of right middle cerebral artery  
46 Acute cerebrovascular accident due to embolism of left middle cerebral artery  
47 Left sided CVA  
48 Right sided CVA  
49 H/O: CVA  
50 CVA annual review

1 CVA unspecified  
2 [RFC] CVA  
3 Thromboangiitis obliterans  
4 Atherosclerotic heart disease  
5 Cerebral atherosclerosis  
6 Acute obliterating bronchiolitis  
7 Endarterectomy of coronary artery  
8 Endarterectomy of aorta and patch repair of aorta  
9 Endarterectomy of aorta  
10 Carotid endarterectomy and patch  
11 Carotid endarterectomy  
12 Obliteration of aneurysm of cerebral artery  
13 Obliteration of aneurysm of circle of Willis  
14 Endarterectomy of subclavian artery  
15 Endarterectomy of brachial artery  
16 Endarterectomy of axillary artery  
17 Endarterectomy of renal artery  
18 Endarterectomy of coeliac artery  
19 Endarterectomy of superior mesenteric artery  
20 Endarterectomy of visceral branch of abdominal aorta NEC  
21 Femoral endarterectomy  
22 Endarterectomy of popliteal artery  
23 Uncomplicated arteriosclerotic dementia  
24 Arteriosclerotic dementia with delirium  
25 Arteriosclerotic dementia with paranoia  
26 Arteriosclerotic dementia with depression  
27 Arteriosclerotic dementia NOS  
28 Cardiovascular arteriosclerosis unspecified  
29 Extremity artery atheroma  
30 Extremity artery atheroma NOS  
31 Atheroma of artery  
32 Arteriosclerotic vascular disease NOS  
33 Thromboangiitis obliterans NOS  
34 [X]Atherosclerosis of other arteries  
35 Iliac endarterectomy and patch  
36 Endarterectomy of iliac artery  
37 Endarterectomy and patch repair of artery  
38 Endarterectomy and patch repair of common iliac artery  
39 Endarterectomy of common iliac artery  
40 Endarterectomy and repair  
41 Atherosclerotic renal artery stenosis  
42 ARAS - Atherosclerotic renal artery stenosis  
43 Arteriosclerotic dementia  
44 Renal artery atherosclerosis  
45 Atherogenic lipoprotein phenotype  
46 Arteriosclerotic heart disease  
47 Pulmonary thromboendarterectomy  
48 Precerebral atherosclerosis  
49 Atherosclerosis of aorta  
50 [X]Arteriosclerotic dementia  
51

1 Arteriosclerosis  
2 Atherosclerotic retinopathy  
3 Arteriosclerotic vascular disease  
4 Atherosclerotic cardiovascular disease  
5 Atherosclerotic retinopathy  
6 Coronary atherosclerosis  
7 Endarterectomy & patch rep visceral branch abdomin aorta NEC  
8 Endarterectomy & patch repair inferior mesenteric artery NEC  
9 Endarterectomy & patch repair superior mesenteric artery NEC  
10 Endarterectomy of axillary artery and patch repair of axillary artery  
11 Endarterectomy of brachial artery and patch repair of brachial artery  
12 Endarterectomy of carotid artery and patch repair of carotid artery  
13 Endarterectomy and patch repair of coeliac artery NEC  
14 Endarterectomy of femoral artery and patch repair of femoral artery  
15 Endarterectomy of iliac artery and patch repair of iliac artery  
16 Endarterectomy of popliteal artery and patch repair of popliteal artery  
17 Endarterectomy of subclavian artery and patch repair of subclavian artery  
18 Endarterectomy and patch repair of suprarenal artery NEC  
19 Endarterectomy of vertebral artery and patch repair of vertebral artery  
20 Endarterectomy  
21 Coronary endarterectomy  
22 Other endarterectomy  
23 Other endarterectomy NOS  
24 Thromboendarterectomy  
25 Cardiovasc. arteriosclerosis  
26 Cerebral arteriosclerosis  
27 Atherosclerosis of extremities  
28 Atherosclerosis NOS  
29 [RFC] Atherosclerosis of lower limbs  
30 Pleural cavity obliteration  
31 Other endarterectomy  
32 Carotid atherosclerosis  
33 Percutaneous endarterectomy  
34 Carotid endarterectomy  
35 Non-obstructive coronary atherosclerosis  
36 Endarterectomy of femoral artery  
37 Atherosclerotic fibrous plaque  
38 Arteriosclerosis  
39 Calcified atheromatous plaque  
40 Calcified atheroma  
41 Atherosclerosis  
42 Atheromatosis  
43 Obliterative bronchiolitis  
44 Atherosclerosis of renal artery  
45 Atheroma  
46 Atheromatous plaque  
47 Obliteration of mastoid cavity  
48 Non-oblitterative otosclerosis  
49 Cerebral arteriosclerosis  
50 CEA - Carotid endarterectomy

1  
2 Coronary artery atheroma  
3 Atherosclerosis aorta  
4 Subcortical arteriosclerotic encephalopathy  
5 Subcortical atherosclerotic dementia  
6 Calcific coronary arteriosclerosis  
7 Obliteration  
8  
9 Atherosclerotic occlusive disease  
10 Atherosclerotic ischaemic disease  
11 Atherosclerotic ischemic disease  
12 Atheromatous degeneration  
13 Percutaneous endarterectomy of coronary artery  
14 Endarterectomy of internal carotid artery  
15 Endarterectomy of common femoral artery  
16 CFA - Endarterectomy of the common femoral artery  
17 Aortoiliac atherosclerosis  
18 Percutaneous endovascular obliteration  
19 Percutaneous endarterectomy of superficial femoral artery  
20 Percutaneous endarterectomy of internal carotid artery  
21 Carotid artery atheroma  
22 Percutaneous rotational coronary endarterectomy  
23 Endarterectomy and angioplasty of lower limb artery  
24 Obliterative coronary artery disease  
25 Coronary arteriosclerosis due to radiation  
26 Recurrent coronary arteriosclerosis after percutaneous transluminal coronary angioplasty  
27 Coronary arteriosclerosis of coronary artery bypass graft  
28 Atherosclerosis artery  
29 Atherosclerosis of coronary artery  
30 Arteriosclerosis of coronary artery bypass graft of transplanted heart  
31 Non-obstructive atherosclerosis of coronary artery  
32 Atherosclerosis of autologous coronary artery bypass graft  
33 Atherosclerosis of bilateral carotid arteries  
34 Atherosclerosis of right carotid artery  
35 Unstable angina co-occurrent and due to coronary arteriosclerosis  
36 Bilateral lower limb atherosclerosis pain at rest co-occurrent and due to atherosclerosis  
37 Arteriosclerosis of autologous vein coronary artery bypass graft with angina  
38 Ulcer of heel due to atherosclerosis of artery of lower limb  
39 Ulcer of ankle due to atherosclerosis of artery of lower limb  
40 Retinopathy due to atherosclerosis  
41 Bilateral intermittent claudication of lower limbs due to atherosclerosis of nonbiological bypass graft  
42 Congenital aortic stenosis  
43 Rheumatic aortic stenosis  
44 Repair of subaortic stenosis  
45 Mitral and aortic stenosis  
46 Mitral stenosis and aortic insufficiency  
47 Mitral stenosis and aortic regurgitation  
48 Mitral stenosis and aortic incompetence  
49 Mitral incompetence and aortic stenosis  
50 Mitral regurgitation and aortic stenosis  
51 Mitral insufficiency and aortic stenosis  
52 Aortic stenosis, non-rheumatic

1 Aortic valve stenosis  
2 Aortic valve stenosis with insufficiency  
3 Subaortic stenosis  
4 Atresia and stenosis of aorta  
5 Atresia or stenosis of aorta NOS  
6 Preductal aortic stenosis  
7 Postductal aortic stenosis  
8 Stenosis of aortic arch  
9 Aortic valve stenosis  
10 Supravalvar aortic stenosis  
11 Repair of supra-aortic stenosis  
12 Congenital stenosis of aortic valve  
13 Congenital stenosis of ascending aorta  
14 RH. aortic stenosis + insuffic  
15 Stenosis of dialysis vascular access  
16 Calcific aortic stenosis - bicuspid valve  
17 Senile aortic stenosis  
18 Stenosis of thoracic aorta  
19 Vascular graft stenosis  
20 SVAS - Supravalvar aortic stenosis  
21 Isolated aortic stenosis  
22 Critical stenosis of aortic valve  
23 Family history of stenosis of aortic valve  
24 Repair of supravalvar aortic stenosis  
25 Cerebrovascular accident due to stenosis of bilateral carotid arteries  
26 Mild aortic valve stenosis  
27 Mild stenosis of aortic valve  
28 Moderate aortic valve stenosis  
29 Moderate stenosis of aortic valve  
30 Severe aortic valve stenosis  
31 Severe stenosis of aortic valve  
32 Acute cerebrovascular accident due to stenosis of left carotid artery  
33 Acute cerebrovascular accident due to stenosis of right carotid artery  
34 Heart valve stenosis  
35 Stricture of aorta  
36 Constrictive pericarditis  
37 Constrictive cardiomyopathy  
38 Constrictive pericarditis NOS  
39 Primary restrictive cardiomyopathy  
40 Aortic valve opening restricted  
41 Restrictive cardiomyopathy with endomyocardial fibrosis  
42 Restrictive cardiomyopathy  
43 Cerebrovascular disease  
44 Evacuation of intracerebral haematoma  
45 [X]Other vascular dementia  
46 [X]Vascular dementia, unspecified  
47 Cerebral degeneration due to cerebrovascular disease  
48 Subarachnoid haemorrhage from carotid siphon and bifurcation  
49 Subarachnoid haemorrhage from vertebral artery  
50 Subarachnoid haemorrhage NOS

1  
2 Intracerebral haemorrhage, intraventricular  
3 Intracerebral haemorrhage NOS  
4 Other cerebrovascular disease  
5 Generalised ischaemic cerebrovascular disease NOS  
6 Other cerebrovascular disease OS  
7 Other cerebrovascular disease NOS  
8 Late effects of cerebrovascular disease  
9 Sequelae of subarachnoid haemorrhage  
10 Sequelae of intracerebral haemorrhage  
11 Other specified cerebrovascular disease  
12 Cerebrovascular disease NOS  
13 [X]Subarachnoid haemorrhage from other intracranial arteries  
14 [X]Other subarachnoid haemorrhage  
15 [X]Other specified cerebrovascular diseases  
16 [X]Intracerebral haemorrhage in hemisphere, unspecified  
17 Intracerebral haematoma in fetus or newborn  
18 Subarachnoid haemorrhage due to birth injury  
19 Subarachnoid haemorrhage  
20 Subarachnoid haemorrhage following injury with open intracranial wound, with no loss of consciousness  
21 Subarachnoid haemorrhage from intracranial artery, unspecif  
22 Subarachnoid haemorrhage from basilar artery  
23 Subarachnoid haemorrhage from middle cerebral artery  
24 Subarachnoid haemorrhage from posterior communicating artery  
25 Sequelae/other + unspecified cerebrovascular diseases  
26 Right sided intracerebral haemorrhage, unspecified  
27 Suspected cerebrovascular disease  
28 [X]Cerebrovascular diseases  
29 Mixed cortical and subcortical vascular dementia  
30 [X]Multi-infarct dementia  
31 [X]Other cerebrovascular disorders in diseases CE  
32 [X]Other vascular syndroms/brain in cerebrovasculr diseases  
33 [X]Sequelae/other + unspecified cerebrovascular diseases  
34 Subcortical vascular dementia  
35 Vascular dementia  
36 Vascular dementia of acute onset  
37 Family history of subarachnoid haemorrhage  
38 Multi-infarct dementia  
39 Intracerebral haemorrhage in hemisphere, unspecified  
40 Intracerebral haemorrhage, multiple localized  
41 Left sided intracerebral haemorrhage, unspecified  
42 Diffuse cerebrovascular disease  
43 H/O subarachnoid haemorrhage  
44 [D] Vascular dementia  
45 Small vessel cerebrovascular disease  
46 At risk of cerebrovascular disease  
47 High risk of cerebrovascular disease  
48 Cerebrovascular disease monitoring in secondary care  
49 Cerebrovascular disease monitoring default  
50 Cerebrovascular disease management  
51 Vascular dementia of acute onset, without additional symptoms



1 Vascular dementia of acute onset, other symptoms, predominantly delusional  
2 Vascular dementia of acute onset, other mixed symptoms  
3 Multi-infarct dementia, other symptoms, predominantly depressive  
4 Multi-infarct dementia, other mixed symptoms  
5 Subcortical vascular dementia, without additional symptoms  
6 Subcortical vascular dementia, other symptoms, predominantly delusional  
7 Subcortical vascular dementia, other symptoms, predominantly hallucinatory  
8 Subcortical vascular dementia, other mixed symptoms  
9 Mixed cortical and subcortical vascular dementia, without additional symptoms  
10 Mixed cortical and subcortical vascular dementia, other symptoms, predominantly delusional  
11 Mixed cortical and subcortical vascular dementia, other symptoms, predominantly hallucinatory  
12 Mixed cortical and subcortical vascular dementia, other symptoms, predominantly depressive  
13 Mixed cortical and subcortical vascular dementia, other mixed symptoms  
14 Other vascular dementia, without additional symptoms  
15 Other vascular dementia, other symptoms, predominantly delusional  
16 Other vascular dementia, other symptoms, predominantly hallucinatory  
17 Other vascular dementia, other symptoms, predominantly depressive  
18 Other vascular dementia, other mixed symptoms  
19 Vascular dementia, unspecified, without additional symptoms  
20 Vascular dementia, unspecified, other symptoms, predominantly hallucinatory  
21 Vascular dementia, unspecified, other mixed symptoms  
22 Vascular dementia, with delirium  
23 Predominantly cortical vascular dementia  
24 SAH - Subarachnoid haemorrhage  
25 Multi-infarct dementia with delusions  
26 MID - Multi-infarct dementia  
27 VAD - Vascular dementia  
28 CVD - Cerebrovascular disease  
29 Multi-infarct dementia, uncomplicated  
30 History of subarachnoid haemorrhage  
31 Intracerebral haemorrhage with intraventricular haemorrhage  
32 Intracerebral haemorrhage, multiple localised  
33 Sequelae of cerebrovascular disease  
34 Subarachnoid haemorrhage due to ruptured aneurysm  
35 Asymptomatic cerebrovascular disease  
36 Traumatic intracranial subarachnoid haemorrhage  
37 Traumatic cranial subarachnoid haemorrhage  
38 Subarachnoid haemorrhage from middle cerebral artery aneurysm  
39 Subarachnoid haemorrhage from anterior communicating artery aneurysm  
40 Subarachnoid haemorrhage from posterior communicating artery aneurysm  
41 Subarachnoid haemorrhage from basilar artery aneurysm  
42 Subarachnoid haemorrhage from posterior inferior cerebellar artery aneurysm  
43 Intracerebellar and posterior fossa haemorrhage  
44 Traumatic intracerebral haemorrhage  
45 Non-aneurysmal subarachnoid intracranial haemorrhage  
46 Traumatic subarachnoid haemorrhage without coma  
47 Ischaemic vascular dementia  
48 Vascular dementia with behavioural disturbance  
49 Vascular dementia with behavioral disturbance  
50 Nontraumatic intracerebral haemorrhage

1 FH: Subarachnoid haemorrhage  
2 Intracerebral haemorrhage  
3 MVAD - Mixed vascular Alzheimer dementia  
4 Subarachnoid haemorrhage due to traumatic injury  
5 Cerebral ischaemic stroke co-occurrent with subarachnoid haemorrhage  
6 Cortical vascular dementia  
7 Pulmonary embolism  
8 H/O: pulmonary embolus  
9 Trendelenburg pulmonary embolectomy  
10 Open embolisation of pulmonary artery  
11 Percutaneous transluminal embolisation of pulmonary artery  
12 Pulmonary embolism following abortive pregnancy  
13 Obstetric pulmonary embolism  
14 Obstetric pulmonary embolus  
15 Obstetric air pulmonary embolism  
16 Obstetric air pulmonary embolism - delivered  
17 Amniotic fluid pulmonary embolism unspecified  
18 Amniotic fluid pulmonary embolism - delivered  
19 Amniotic fluid pulmonary embolism NOS  
20 Obstetric blood-clot pulmonary embolism  
21 Obstetric blood-clot pulmonary embolism unspecified  
22 Obstetric blood-clot pulmonary embolism - delivered  
23 Obstetric blood-clot pulmonary embolism NOS  
24 Obstetric pyaemic and septic pulmonary embolism unspecified  
25 Obstetric pyaemic and septic pulmonary embolism NOS  
26 Other obstetric pulmonary embolism unspecified  
27 Other obstetric pulmonary embolism - delivered  
28 Other obstetric pulmonary embolism NOS  
29 Obstetric pulmonary embolism NOS  
30 Obstetric pulmonary embolism NOS, unspecified  
31 Obstetric pulmonary embolism NOS - delivered  
32 Obstetric pulmonary embolism NOS with antenatal complication  
33 Obstetric pulmonary embolism NOS with postnatal complication  
34 Thromboembolic pulmonary hypertension  
35 Obstetric pyaemic and septic pulmonary embolism  
36 Other obstetric pulmonary embolism  
37 [V] Personal history of pulmonary embolism  
38 Suspected pulmonary embolism  
39 Other obstetric pulmonary embolism - delivered + p/n comp  
40 Other obstetric pulmonary embolism with antenatal comp  
41 Pulmonary embolus  
42 Postoperative pulmonary embolus  
43 Percutaneous transluminal embolectomy of pulmonary artery  
44 Open pulmonary embolectomy  
45 Obstetric pulmonary embolism NOS  
46 Obstetric pulmonary embolism NOS - delivered with p/n comp  
47 Obstetric blood-clot pulmonary embolism - delivered with postnatal complication  
48 Obstetric blood-clot pulmonary embolism with antenatal complication  
49 Obstetric blood-clot pulmonary embolism with postnatal complication  
50 Obstetric air pulmonary embolism with a/n complication

1 Obstetric air pulmonary embolism with p/n complication  
2 Amniotic fluid pulmonary embolism - delivered with postnatal complication  
3 Amniotic fluid pulmonary embolism with antenatal complication  
4 Amniotic fluid pulmonary embolism with postnatal complication  
5 Recurrent pulmonary embolism  
6 Obstetrical pulmonary embolism  
7 [RFC] Pulmonary embolism/pulmonary hypertension  
8 Wells pulmonary embolus clinical probability score  
9 Percutaneous transluminal embolisation of major systemic to pulmonary collateral artery  
10 Thromboembolic pulmonary hypertension  
11 History of pulmonary embolus  
12 Percutaneous embolectomy of pulmonary artery  
13 Pulmonary thromboembolism  
14 Acute massive pulmonary embolism  
15 Subacute massive pulmonary embolism  
16 SAMPE - Subacute massive pulmonary embolism  
17 Pulmonary fat embolism  
18 Pulmonary tumour embolism  
19 Chronic thromboembolic pulmonary hypertension  
20 Pulmonary air embolism  
21 Embolisation of pulmonary artery  
22 Embolization of pulmonary artery  
23 Pulmonary embolus care  
24 Family history of pulmonary embolism  
25 Acute pulmonary embolism  
26 Chronic pulmonary thromboembolism  
27 Pulmonary embolism with pulmonary infarction  
28 Chronic pulmonary embolism  
29 Saddle embolus of pulmonary artery  
30 Diastolic dysfunction  
31 Diaphyseal dysplasia  
32 Diastrophic dysplasia  
33 Dysenteric diarrhoea  
34 Left ventricular systolic dysfunction  
35 Central nervous system dysfunction in newborn NOS  
36 Other cardiac dysrhythmias  
37 Cardiac dysrhythmia  
38 Lipodystrophy, partial, with Rieger anomaly, short stature, and insulinopenic diabetes mellitus  
39 Echocardiogram shows left ventricular systolic dysfunction  
40 No evidence of left ventricular diastolic dysfunction  
41 Right ventricular systolic dysfunction  
42 Right ventricular diastolic dysfunction  
43 Undiagnosed dyspepsia  
44 Central nervous system dysfunction in newborn NOS  
45 Dysfunction of vestibular system  
46 Diabetic erectile dysfunction review  
47 Assessment of diabetic erectile dysfunction  
48 Somatoform autonomic dysfunction, heart and cardiovascular system  
49 Somatoform autonomic dysfunction, respiratory system  
50 Somatoform autonomic dysfunction, genitourinary system

1 Severe left ventricular systolic dysfunction  
2 Median nail dystrophy of Heller  
3 Ischaemic myocardial dysfunction  
4 Chronic left ventricular systolic dysfunction  
5 Dysfunction of right cardiac ventricle  
6 Right ventricular cardiac dysfunction  
7 Asymptomatic left ventricular systolic dysfunction  
8 Dyslipidemia with high density lipoprotein below reference range and triglyceride above reference range due to  
9 Erectile dysfunction due to diabetes mellitus  
10 Atrial flutter  
11 Hypsarrhythmia  
12 Sinus arrhythmia  
13 ECG: supraventricular arrhythmia  
14 Supraventricular arrhythmia absent on electrocardiogram  
15 ECG: atrial flutter  
16 Electrocardiographic supraventricular arrhythmia  
17 ECG: ventricular arrhythmia  
18 ECG: no ventricular arrhythmia  
19 Self-help advice leaflet given  
20 Diabetic leaflet given  
21 Alcohol leaflet given  
22 Blood pressure leaflet given  
23 Arrhythmogenic right ventricular cardiomyopathy  
24 Cardiac arrhythmia  
25 Chronic obstructive pulmonary disease leaflet given  
26 Epilepsy leaflet given  
27 Contraception leaflet given  
28 History of atrial flutter  
29 Provision of smoking cessation leaflet  
30 Mental health information leaflet given  
31 Disease modifying antirheumatic drug information leaflet given  
32 Coeliac leaflet given  
33 Organ donation information leaflet given  
34 Toxic effect of aflatoxin  
35 Ventricular arrhythmia  
36 Posterior leaflet of mitral valve  
37 True cleft of mitral leaflet  
38 Operation on mitral leaflet  
39 Ablation operation for arrhythmia  
40 Diathermy ablation operation for arrhythmia  
41 Laser ablation operation for arrhythmia  
42 Radiofrequency ablation operation for arrhythmia  
43 Marked sinus arrhythmia  
44 True cleft of left atrioventricular valve leaflet  
45 Arrhythmogenic right ventricular dysplasia  
46 Arrhythmogenic right ventricular cardiomyopathy  
47 PTFE - Polytetrafluoroethylene  
48 Neonatal dysrhythmia  
49 Neonatal arrhythmia  
50 Mitral valve anterior leaflet prolapse

1 ECG automated dysrhythmia monitoring  
2 ECG: sinus arrhythmia  
3 Tricuspid leaflet thickened  
4 Cardiac arrhythmia physiologic monitoring system  
5 Provision of leaflet  
6 Giving self-help leaflet  
7 Downs syndrome antenatal screening information leaflet given  
8 Oedema information leaflet given  
9 ECG: myocardial infarction  
10 ECG: no myocardial infarction  
11 ECG: old myocardial infarction  
12 ECG: myocardial infarct NOS  
13 Acute anterior myocardial infarction  
14 Anterior myocardial infarction NOS  
15 Acute posterior myocardial infarction  
16 True posterior myocardial infarction  
17 Acute myocardial infarction of inferior wall  
18 Other acute myocardial infarction  
19 Other acute myocardial infarction NOS  
20 Acute myocardial infarction NOS  
21 Coronary thrombosis not resulting in myocardial infarction  
22 Subsequent myocardial infarction  
23 Subsequent myocardial infarction of anterior wall  
24 Subsequent myocardial infarction of inferior wall  
25 Subsequent myocardial infarction of other sites  
26 [X]Subsequent myocardial infarction of other sites  
27 [X]Subsequent myocardial infarction of unspecified site  
28 Silent myocardial infarction  
29 FH: Myocardial infarction  
30 H/O: Myocardial infarction in last year  
31 Postoperative subendocardial myocardial infarction  
32 Postoperative myocardial infarction, unspecified  
33 FH myocardial infarction male first degree age known  
34 FH myocardial infarction male first degree age unknown  
35 FH myocardial infarction female first degree age unknown  
36 [V]Observation for suspected myocardial infarction  
37 Family history of myocardial infarct in first degree female relative less than 65 years of age  
38 Thrombosis of atrium, auricular appendage, and ventricle as current complications following acute myocardial  
39 Subsequent myocardial infarction of unspecified site  
40 Rupture of cardiac wall without haemopericardium as current complication following acute myocardial infarct  
41 Rupture of chordae tendinae as current complication following acute myocardial infarction  
42 Rupture of papillary muscle as current complication following acute myocardial infarction  
43 Postoperative transmural myocardial infarction of anterior wall  
44 Postoperative transmural myocardial infarction of inferior wall  
45 Postoperative transmural myocardial infarction other sites  
46 Postoperative transmural myocardial infarction unspec site  
47 FH: Myocardial infarction < 60  
48 FH: Myocardial infarction at less than 60  
49 FH: Myocardial infarction > 60  
50 FH: Myocardial infarction at greater than 60

1  
2 Attack - heart  
3 MI - acute myocardial infarction  
4 Did not attend heart failure clinic  
5 [X]Other current complicatns following acute myocard infarct  
6 Acute anterolateral myocardial infarction  
7 Acute transmural myocardial infarction of unspecif site  
8 Cardiac rupture after acute myocardial infarction  
9 Myocardial infarction with complication  
10 Child exam - heart: Attends Clinic  
11 Degeneration fatty heart  
12 Diabetes mellitus insulin-glucose infusion in acute myocardial infarction  
13 Fatty degeneration of heart  
14 Fatty infiltration heart  
15 Myocardial infarction aborted  
16 Haemopericardium as current complication following acute myocardial infarction  
17 Myocardial Infarction  
18 [RFC] Myocardial infarction (MI)  
19 Acute myocardial infarction of posterolateral wall  
20 Cause of Death- Myocardial Infarction  
21 CHADS2 (congestive heart failure, hypertension, age 75 years or older, diabetes mellitus and previous stroke o  
22 Did not attend congenital heart disease clinic  
23 History of myocardial infarction  
24 Exception reporting - myocardial infarction quality indicators  
25 Myocardial infarction  
26 MI - Myocardial infarction  
27 Myocardial infarct  
28 Past myocardial infarction diagnosed on ECG AND/OR other special investigation, but currently presenting no :  
29 AMI - Acute myocardial infarction  
30 Acute myocardial infarction of lateral wall  
31 Acute myocardial infarction of apical-lateral wall  
32 Acute myocardial infarction of high lateral wall  
33 Acute myocardial infarction of inferolateral wall  
34 Postmyocardial infarction syndrome  
35 Acute myocardial infarction of anterolateral wall  
36 Acute inferior myocardial infarction  
37 Acute myocardial infarction of inferoposterior wall  
38 Aborted myocardial infarction  
39 Old anterior myocardial infarction  
40 Old inferior myocardial infarction  
41 Old lateral myocardial infarction  
42 Old posterior myocardial infarction  
43 MI - Silent myocardial infarction  
44 Family history: Myocardial infarction  
45 Family history: Myocardial infarction at greater than 60  
46 Anxiety about having a heart attack  
47 Normal fetal heart baseline pattern  
48 Acute Q wave myocardial infarction  
49 Non-Q wave myocardial infarction  
50 Congestive heart failure, hypertension, age 75 years or older, diabetes, and previous stroke or transient ischae  
51 History of non-ST segment elevation myocardial infarction

1 Acute anterior ST segment elevation myocardial infarction  
2 Acute STEMI (ST elevation myocardial infarction) of anterior wall  
3 Acute ST segment elevation myocardial infarction of anterior wall involving right ventricle  
4 Subsequent ST segment elevation myocardial infarction of inferior wall  
5 Acute ST segment elevation myocardial infarction of inferior wall  
6 Acute STEMI (ST elevation myocardial infarction) of inferior wall  
7 Acute inferior ST segment elevation myocardial infarction  
8 Acute ST segment elevation myocardial infarction of inferior wall involving right ventricle  
9 Mitral valve regurgitation due to acute myocardial infarction  
10 Subsequent non-ST segment elevation myocardial infarction  
11 Subsequent NSTEMI (non-ST segment elevation myocardial infarction)  
12 Inducible ischaemia manifest on stress test post myocardial infarction  
13 Acute myocardial infarction due to right coronary artery occlusion  
14 History of acute ST segment elevation myocardial infarction  
15 Acute ST segment elevation myocardial infarction involving left anterior descending coronary artery  
16 Family history of myocardial infarction in second degree relative less than 50 years  
17 Family history of myocardial infarction in first degree relative less than 60 years  
18 Thrombolysis In Myocardial Infarction risk score for unstable angina or non-ST-segment-elevation myocardial i  
19 Acute ST segment elevation myocardial infarction of anterolateral wall  
20 Acute ST segment elevation myocardial infarction of lateral wall  
21 Acute ST segment elevation myocardial infarction of anteroseptal wall  
22 Mural thrombus of left ventricle following acute myocardial infarction  
23 Assessment using CHADS2 (congestive heart failure, hypertension, age 75 years or older, diabetes mellitus and  
24 CHADS2 (congestive heart failure, hypertension, age 75 years or older, diabetes mellitus and previous stroke o  
25 Acute ST segment elevation myocardial infarction of inferolateral wall  
26 Acute ST segment elevation myocardial infarction of inferoposterior wall  
27 Delayed postmyocardial infarction pericarditis  
28 Acute myocardial infarction of right ventricle  
29 Acute STEMI (ST elevation myocardial infarction) due to proximal LAD (left anterior descending) coronary arte  
30 Acute ST segment elevation myocardial infarction due to mid left anterior descending coronary artery occlusio  
31 Acute STEMI (ST elevation myocardial infarction) due to mid LAD (left anterior descending) coronary artery oc  
32 Acute ST segment elevation myocardial infarction due to distal left anterior descending coronary artery occlus  
33 Acute STEMI (ST elevation myocardial infarction) due to distal LAD (left anterior descending) coronary artery o  
34 Acute ST segment elevation myocardial infarction due to occlusion of anterior descending branch of left coron  
35 Acute ST segment elevation myocardial infarction due to occlusion of intermediate artery  
36 Acute STEMI (ST elevation myocardial infarction) due to PDA (posterior descending artery) branch of RCA (righ  
37 Acute ST segment elevation myocardial infarction due to occlusion of posterior lateral branch of right coronar  
38 Myocardial infarction due to demand ischaemia  
39 Rupture of ventricle due to acute myocardial infarction  
40 Myocardial infarction with non-obstructive coronary artery  
41 MINOCA - myocardial infarction with non-obstructive coronary artery  
42 Acute myocardial infarction due to occlusion of circumflex branch of left coronary artery  
43 Acute STEMI (ST segment elevation myocardial infarction) of apex of heart  
44 MI - Mitral incompetence  
45 NSTEMI - Non-ST segment elevation MI  
46 Myocardial infarction with non-obstructive coronary artery  
47 MINOCA - myocardial infarction with non-obstructive coronary artery  
48 Acute myocardial infarction due to occlusion of circumflex branch of left coronary artery  
49 Acute STEMI (ST segment elevation myocardial infarction) of apex of heart  
50 MI - Mitral incompetence



1 NSTEMI - Non-ST segment elevation MI  
2 Pulmonary arterial hypertension  
3 Benign hypertensive heart disease  
4 Malignant hypertensive heart disease  
5 Hypertensive heart disease  
6 Benign hypertensive heart AND renal disease  
7 Malignant hypertensive heart AND renal disease  
8 Hypertensive heart AND renal disease  
9 Secondary pulmonary hypertension  
10 Malignant hypertensive heart disease NOS  
11 Benign hypertensive heart disease NOS  
12 Hypertensive heart disease NOS  
13 Hypertensive heart and renal disease with renal failure  
14 Hypertensive heart and renal disease NOS  
15 Thromboembolic pulmonary hypertension  
16 Cardiomegaly - hypertensive  
17 Benign hypertensive heart disease with congestive cardiac failure  
18 Malignant hypertensive heart disease with congestive cardiac failure  
19 Hypertensive heart disease NOS  
20 Hypertensive heart disease NOS with CCF  
21 Hypertensive heart disease NOS without CCF  
22 Hypertensive heart and renal disease with (congestive) heart failure  
23 Hypertensive heart and renal disease with both (congestive) heart failure and renal failure  
24 Hypertensive renal + heart dis  
25 [RFC] Pulmonary embolism/pulmonary hypertension  
26 Thromboembolic pulmonary hypertension  
27 Pulmonary arterial hypertension drugs Band 1  
28 Pulmonary arterial hypertension drugs Band 2  
29 Pulmonary arterial hypertension drugs Band 3  
30 Pulmonary arterial hypertension drugs Band 4  
31 Progressive pulmonary hypertension  
32 Hypertensive heart failure  
33 Hypertensive cardiopathy  
34 Pulmonary hypertension  
35 Chronic thromboembolic pulmonary hypertension  
36 Pulmonary hypertension with occult mitral stenosis  
37 Pulmonary hypertension secondary to raised pulmonary vascular resistance  
38 Right heart failure due to pulmonary hypertension  
39 Precapillary pulmonary hypertension  
40 Pulmonary arterial hypertension associated with connective tissue disease  
41 Mild pulmonary hypertension  
42 Moderate pulmonary hypertension  
43 Double outlet right ventricle with subpulmonary ventricular septal defect  
44 Atrial fibrillation  
45 Ventricular fibrillation  
46 H/O ventricular fibrillation  
47 ECG: atrial fibrillation  
48 ECG: ventricular fibrillation  
49 Atrial fibrillation and flutter  
50 Atrial fibrillation and flutter NOS



1 Ventricular fibrillation and flutter  
2 Ventricular fibrillation and flutter NOS  
3 Non-rheumatic atrial fibrillation  
4 Paroxysmal atrial fibrillation  
5 H/O: atrial fibrillation  
6 Implantation of internal cardiac defibrillator  
7 External ventricular defibrillation  
8 Chronic atrial fibrillation  
9 Cardioverter defibrillator introduced through the vein  
10 Replacement of cardioverter defibrillator  
11 Cardioverter defibrillator introduced through the vein NOS  
12 Persistent atrial fibrillation  
13 Permanent atrial fibrillation  
14 Implantation of intravenous pacemaker for atrial fibrillation  
15 Implantation of cardioverter defibrillator with one electrode lead  
16 Implantation of cardioverter defibrillator with two electrode leads  
17 Other specified cardioverter defibrillator intro thr vein  
18 Implantation of cardioverter defibrillator using three electrode leads  
19 Combination internal cardiac defibrillator and pacemaker in situ  
20 Atrial fibrillation confirmed  
21 Cardioverter defibrillator procedure  
22 Cardiac resynchronisation therapy defibrillator device in situ  
23 Implantation of subcutaneous cardioverter defibrillator  
24 Renewal of subcutaneous cardioverter defibrillator  
25 Defibrillator  
26 Defibrillator, device  
27 Revision of automatic implantable cardioverter/defibrillator  
28 AF - Atrial fibrillation  
29 Implantable defibrillator  
30 Implantable defibrillator, device  
31 Automatic defibrillator procedure  
32 ICD - Internal cardiac defibrillator procedure  
33 Implantation of automatic cardiac defibrillator  
34 Lone atrial fibrillation  
35 AF - Paroxysmal atrial fibrillation  
36 PAF - Paroxysmal atrial fibrillation  
37 Intermittent atrial fibrillation  
38 Controlled atrial fibrillation  
39 History of atrial fibrillation  
40 Rapid atrial fibrillation  
41 Transient cerebral ischaemia due to atrial fibrillation  
42 History of combination internal cardiac defibrillator and pacemaker  
43 Insertion of cardiac defibrillator using fluoroscopic guidance  
44 Insertion of cardiac biventricular implantable cardioverter defibrillator (ICD) using fluoroscopic guidance  
45 Cardiac defibrillator in situ  
46 Implantation of cardioverter defibrillator with three electrode leads  
47 Automatic implantable cardiac defibrillator in situ  
48 Insertion of single chamber pacing cardioverter defibrillator pulse generator  
49 Insertion of biventricular implantable cardioverter defibrillator  
50 Insertion of pacemaker for control of atrial fibrillation

1 Single-chamber implantable defibrillator  
2 Dual-chamber implantable defibrillator  
3 Cardiac resynchronisation therapy implantable defibrillator  
4 Cardiac resynchronization therapy implantable defibrillator  
5 Longstanding persistent atrial fibrillation  
6 Familial atrial fibrillation  
7 Biventricular automatic implantable cardioverter defibrillator in situ  
8 Atrial fibrillation with rapid ventricular response  
9 Replacement of subcutaneous cardioverter defibrillator  
10 Atrial fibrillation detected  
11 Paroxysmal atrial fibrillation with rapid ventricular response  
12 Replace aneurys fem art by fem/peron a anast c vein graf NEC  
13 Replace aneurys pop art by pop/peron a anast c vein graf NEC  
14 Portal vein thrombosis  
15 Hepatic vein thrombosis  
16 Thromboangiitis obliterans  
17 Pulmonary embolism  
18 Cerebral thrombosis  
19 Thrombotic thrombocytopenic purpura  
20 Thrombotic microangiopathy  
21 Renal artery thrombosis  
22 Deep vein thrombosis of leg related to air travel  
23 H/O: Deep Vein Thrombosis  
24 Phlebitis and thrombophlebitis of intracranial sinuses  
25 Thrombosis of superior longitudinal sinus  
26 Thrombosis transverse sinus  
27 Thrombosis of central nervous system venous sinus NOS  
28 Thrombophlebitis of central nervous system venous sinuses  
29 Thrombophlebitis of cavernous sinus  
30 Thrombophlebitis of superior longitudinal venous sinus  
31 Thrombophlebitis lateral venous sinus  
32 Thrombophlebitis of central nervous system venous sinus NOS  
33 Myelopathy due to arterial thrombosis of spinal cord  
34 Coronary thrombosis not resulting in myocardial infarction  
35 Atrial thrombosis  
36 Cerebral infarct due to thrombosis of precerebral arteries  
37 Cerebral infarction due to thrombosis of cerebral arteries  
38 Thromboangiitis obliterans NOS  
39 Embolism and thrombosis of the thoracic aorta  
40 Embolism and thrombosis of an arm or leg artery  
41 Embolism and thrombosis of the brachial artery  
42 Embolism and thrombosis of the radial artery  
43 Embolism and thrombosis of the ulnar artery  
44 Embolism and thrombosis of an arm artery NOS  
45 Embolism and thrombosis of the femoral artery  
46 Embolism and thrombosis of the popliteal artery  
47 Embolism and thrombosis of the anterior tibial artery  
48 Embolism and thrombosis of the dorsalis pedis artery  
49 Embolism and thrombosis of the posterior tibial artery  
50 Embolism and thrombosis of a leg artery NOS

1 Peripheral arterial embolism and thrombosis NOS  
2 Embolism and thrombosis of other specified artery  
3 Embolism and/or thrombosis of the common iliac artery  
4 Embolism and/or thrombosis of the internal iliac artery  
5 Embolism and/or thrombosis of the external iliac artery  
6 Embolism and thrombosis of the iliac artery unspecified  
7 Embolism and thrombosis of the subclavian artery  
8 Embolism and thrombosis of the splenic artery  
9 Embolism and thrombosis of the axillary artery  
10 Embolism and thrombosis of the coeliac artery  
11 Embolism and thrombosis of the hepatic artery  
12 Embolism and thrombosis of other arteries NOS  
13 Arterial embolism and thrombosis NOS  
14 Thrombophlebitis of the femoral vein  
15 Thrombophlebitis of the popliteal vein  
16 Thrombophlebitis of the anterior tibial vein  
17 Thrombophlebitis of the posterior tibial vein  
18 Thrombophlebitis of deep veins of lower extremity  
19 Deep vein phlebitis and thrombophlebitis of the leg NOS  
20 Thrombophlebitis of the common iliac vein  
21 Thrombophlebitis of the internal iliac vein  
22 Thrombophlebitis of the external iliac vein  
23 Thrombophlebitis of iliac vein  
24 Phlebitis and thrombophlebitis of the iliac vein NOS  
25 Thromboembolism of vein  
26 Embolism and thrombosis of the vena cava  
27 Embolism and thrombosis of the renal vein  
28 Other embolism and thrombosis  
29 Embolism and thrombosis NOS  
30 [X]Embolism and thrombosis of other arteries  
31 Thrombosis of mesenteric vein  
32 Scrotal thrombosis  
33 Male genital thrombosis NOS  
34 Pulmonary embolism following abortive pregnancy  
35 Antenatal deep vein thrombosis unspecified  
36 Antenatal deep vein thrombosis - delivered  
37 Antenatal deep vein thrombosis with antenatal complication  
38 Antenatal deep vein thrombosis NOS  
39 Postnatal deep vein thrombosis unspecified  
40 Postnatal deep vein thrombosis with postnatal complication  
41 Postnatal deep vein thrombosis NOS  
42 Obstetric cerebral venous thrombosis  
43 Cerebral venous thrombosis in pregnancy  
44 Cerebral venous thrombosis in the puerperium  
45 Obstetric pulmonary embolism  
46 Obstetric blood-clot pulmonary embolism  
47 Obstetric blood-clot pulmonary embolism unspecified  
48 Obstetric blood-clot pulmonary embolism - delivered  
49 Obstetric blood-clot pulmonary embolism NOS  
50 Other obstetric pulmonary embolism unspecified

1  
2 Other obstetric pulmonary embolism - delivered  
3 Other obstetric pulmonary embolism NOS  
4 Obstetric pulmonary embolism NOS  
5 Obstetric pulmonary embolism NOS, unspecified  
6 Obstetric pulmonary embolism NOS - delivered  
7  
8 Obstetric pulmonary embolism NOS with antenatal complication  
9 Obstetric pulmonary embolism NOS with postnatal complication  
10 Thromboembolism after infusion  
11 Anterior spinal artery thrombosis  
12 Arteriovenous fistula thrombosis  
13 Arterial embolic and thrombotic occlusion  
14 Arterial embolus and thrombosis  
15 Embolism and thrombosis of the abdominal aorta  
16 Deep vein phlebitis and thrombophlebitis of the leg  
17 Venous thrombosis  
18 Other obstetric pulmonary embolism  
19 H/O: thrombosis  
20 Phlebitis and/or thrombophlebitis of iliac vein  
21 Thrombosis of inferior vena cava  
22 Axillary vein thrombosis  
23 Thrombosis of renal artery bypass graft  
24 H/O: Deep vein thrombosis  
25 [V] Personal history of pulmonary embolism  
26 Right ventricular thrombosis  
27 Thrombosis of vein of leg  
28 Retinal vein thrombosis  
29 Antenatal deep vein thrombosis  
30 Postnatal deep vein thrombosis  
31 DVT - deep venous thrombosis, postnatal  
32 Penis vein thrombosis  
33 [V] Personal history DVT (deep vein thrombosis)  
34 Mural thrombosis  
35 Cerebral vein thrombosis  
36 Coronary thrombosis  
37 Thrombosis - coronary  
38 Deep vein thrombosis  
39 Deep venous thrombosis  
40 Deep vein thrombosis of lower limb  
41 Deep vein thrombosis of leg related to intravenous drug use  
42 Pulmonary thromboendarterectomy  
43 Percutaneous transluminal thrombolysis of artery  
44 Transjugular intrahepatic thrombolysis of portal vein  
45 Thrombosis of subclavian vein  
46 Right middle cerebral artery thrombosis  
47 Thrombosis of right vertebral artery  
48 Thrombosis of right middle cerebral artery  
49 Thrombosis of left middle cerebral artery  
50 Iliac vein thrombosis  
51 Thrombosis of iliac vein  
52 Other phlebitis and thrombosis in pregnancy and puerperium  
53  
54  
55  
56  
57  
58  
59  
60

1 Other phlebitis/thrombosis in preg/puerperium + a/n comp  
2 Other phlebitis/thrombosis in preg/puerperium + p/n comp  
3 Other phlebitis/thrombosis in preg/puerperium -del +p/n comp  
4 Other phlebitis/thrombosis in pregnancy and puerperium NOS  
5 Other phlebitis/thrombosis in pregnancy/puerperium - deliv  
6 Other phlebitis/thrombosis in pregnancy/puerperium unsp  
7 Other obstetric pulmonary embolism - delivered + p/n comp  
8 Other obstetric pulmonary embolism with antenatal comp  
9 Other obstetric pulmonary embolism with postnatal comp  
10 Thrombosis of atrium, auricular appendage, and ventricle as current complications following acute myocardial  
11 Cerebral venous thrombosis of cavernous sinus  
12 Thrombosis lateral sinus  
13 Cerebral venous sinus thrombosis  
14 Carotid artery thrombosis  
15 Superior mesenteric artery thrombosis  
16 Superior mesenteric vein thrombosis  
17 Puerperal thrombosis NOS  
18 Postnatal deep vein thrombosis - delivered with postnatal complication  
19 Mesenteric thrombosis  
20 Postoperative deep vein thrombosis  
21 H/O: thromboembolism  
22 Arterial thrombosis  
23 Deep vein thrombosis, leg  
24 Phlebitis or thrombophlebitis of CNS venous sinus NOS  
25 Percutaneous transluminal coronary thrombolytic using streptokinase  
26 Percutaneous transluminal thrombolysis of femoral graft using streptokinase  
27 Percutaneous transluminal coronary thrombolysis using streptokinase  
28 Obstetric pulmonary embolism NOS  
29 Obstetric pulmonary embolism NOS - delivered with p/n comp  
30 Obstetric blood-clot pulmonary embolism - delivered with postnatal complication  
31 Obstetric blood-clot pulmonary embolism with antenatal complication  
32 Obstetric blood-clot pulmonary embolism with postnatal complication  
33 Percutaneous transluminal venous thrombolysis NEC  
34 Percutaneous mechanical thromboembolectomy  
35 Percutaneous aspiration thromboembolectomy  
36 [X]Phlebitis+thrombophlebitis/oth deep vessls/low extremities  
37 Arterial embolism and thrombosis  
38 Cerebral infarction due to cerebral venous thrombosis, non-pyogenic  
39 Non-pyogenic venous sinus thrombosis  
40 Recurrent pulmonary embolism  
41 Antenatal DVT  
42 Embolism and thrombosis NOS  
43 Embolism and thrombosis of other and unspec parts aorta  
44 Gestational thrombosis NOS  
45 Axillary vein thrombosis  
46 Thromboendarterectomy  
47 Coronary thrombosis  
48 Arterial embolism/thrombosis  
49 Embolus/thrombosis abd. aorta  
50 Embolus/thrombosis aorta NOS

1  
2 Deep venous thrombosis - leg  
3 Venous thrombosis NOS  
4 Antepartum DVT  
5 Postpartum DVT  
6 Obstetrical pulmonary embolism  
7 [RFC] Venous thrombosis  
8 [RFC] Deep vein thrombosis  
9 Deep venous thrombosis - leg  
10 Deep vein thrombosis of peroneal vein  
11 Percutaneous transluminal thrombolysis of blood vessel of liver  
12 Percutaneous transluminal thrombolysis and reconstruction of artery  
13 Percutaneous transluminal venous thrombolysis with reconstruction  
14 Cerebral venous thrombosis  
15 Recurrent deep vein thrombosis  
16 Thrombosis of stent of renal artery  
17 Recurrent deep vein thrombosis  
18 Postthrombotic syndrome  
19 Thrombosis of dialysis vascular access  
20 Thrombosis of internal jugular vein  
21 Thrombosis of external jugular vein  
22 Thrombosis of artery of transplanted kidney  
23 Thrombosis of dialysis arteriovenous graft  
24 Thrombosis of dialysis arteriovenous fistula  
25 Thrombosis of dialysis arteriovenous shunt  
26 Unprovoked deep vein thrombosis  
27 Provoked deep vein thrombosis  
28 Perianal venous thrombosis  
29 Splenic vein thrombosis  
30 Renal vein thrombosis  
31 Deep thrombophlebitis  
32 Deep vein thrombosis of portal vein  
33 PVT - Portal vein thrombosis  
34 Thrombosis of lateral venous sinus  
35 Cerebral venous thrombosis of lateral sinus  
36 Thrombosed varices  
37 Branch retinal vein thrombosis  
38 Hepatic vein thrombosis  
39 Thrombosis of corpus cavernosum  
40 Thrombosis of retinal vein  
41 Antepartum deep vein thrombosis  
42 Thrombolysis  
43 Femoral artery thrombosis  
44 Postpartum deep phlebothrombosis  
45 Postpartum deep vein thrombosis  
46 Pulmonary artery thrombosis  
47 Pulmonary arterial thrombosis  
48 PE - Pulmonary embolism  
49 Vertebral artery thrombosis  
50 CRVT - Central retinal vein thrombosis  
51 Thrombosis of superior sagittal sinus

1 Sagittal sinus thrombosis  
2 Thrombosis of penile vein  
3 Thrombotic infarction  
4 Pulmonary vein thrombosis  
5 Hepatic artery thrombosis  
6 Thrombosis of abdominal aorta  
7 Popliteal artery thrombosis  
8 Basilar artery thrombosis  
9 Thrombosis of cavernous venous sinus  
10 Thrombosis of arteries of lower extremity  
11 Thrombosis of pelvic vein  
12 Thrombosis of cerebral veins  
13 Cerebral venous thrombosis  
14 Thrombosis of renal artery  
15 Thrombosed aneurysm  
16 DVT - Deep vein thrombosis  
17 History of deep vein thrombosis  
18 Deep venous thrombosis of the superior mesenteric vein  
19 Cerebral venous thrombosis of sigmoid sinus  
20 Cerebral venous thrombosis of cortical vein  
21 Thrombolysis of intracranial vessel  
22 Percutaneous thrombolysis of intracranial artery  
23 Thrombolysis of artery  
24 Percutaneous thrombolysis of common femoral artery  
25 Thrombolysis of vein  
26 Thrombolysis of arteriovenous fistula  
27 Pulmonary thromboembolism  
28 Acute massive pulmonary embolism  
29 Subacute massive pulmonary embolism  
30 SAMPE - Subacute massive pulmonary embolism  
31 Inferior mesenteric vein thrombosis  
32 Thrombosis of vein of lower leg  
33 Iliofemoral deep vein thrombosis  
34 Iliofemoral deep vein thrombosis  
35 Blood clot in eye  
36 Thrombosis  
37 Aortic thromboembolism  
38 Percutaneous thrombolysis of artery  
39 Percutaneous thrombolysis of vein  
40 Brachiocephalic vein thrombosis  
41 Subclavian artery thrombosis  
42 Intracranial venous thrombosis  
43 Digital arterial thrombosis  
44 Septic thrombophlebitis of sagittal sinus  
45 Thrombosis of vein of lower limb  
46 Thrombosis of vein of trunk  
47 Venous thrombosis, phlebitis and thrombophlebitis  
48 Thromboembolic disorder  
49 Thromboembolism  
50 Thromboembolic disease  
51  
52  
53  
54  
55  
56  
57  
58  
59  
60



1  
2 Thrombotic stroke  
3 Coronary artery thrombosis  
4 CT - Coronary thrombosis  
5 Deep venous thrombosis of lower extremity  
6 DVT - Deep vein thrombosis of lower limb  
7  
8 Deep venous thrombosis of leg  
9 Deep venous thrombosis of lower limb  
10 Thrombosis of ulnar artery  
11 Deep venous thrombosis of deep femoral vein  
12 Thrombosis of the popliteal vein  
13 Deep venous thrombosis of the popliteal vein  
14 History of thromboembolism of vein  
15 Venous thromboembolic disease  
16 Thrombosis  
17  
18 Deep venous thrombosis of peroneal vein  
19 Thrombosis of middle cerebral artery  
20 Cerebral infarction due to thrombosis of middle cerebral artery  
21 Acute pulmonary embolism  
22 Chronic pulmonary thromboembolism  
23 Pulmonary embolism on long-term anticoagulation therapy  
24 Acute occlusion of artery of lower limb co-occurrent and due to thromboembolus  
25 Acute deep vein thrombosis of lower limb  
26 Pulmonary embolism with pulmonary infarction  
27 Acute deep venous thrombosis  
28 Acute deep venous thrombosis of femoral vein  
29 Acute deep venous thrombosis of ileofemoral vein  
30 Chronic pulmonary embolism  
31 Acute deep venous thrombosis of internal jugular vein  
32 History of recurrent deep vein thrombosis  
33 Unprovoked DVT (deep vein thrombosis)  
34 Provoked DVT (deep vein thrombosis)  
35 Thrombosis of arm  
36 LVAD (left ventricular assist device) thrombosis  
37 Chronic deep vein thrombosis of left iliac vein  
38 Acute deep vein thrombosis of left iliac vein  
39 Acute thrombosis of superficial vein of bilateral upper limbs  
40 Right iliac artery thrombosis  
41 Splenic artery thrombosis  
42 Left common femoral artery thrombosis  
43 Thrombophlebitis of right jugular vein  
44 Chronic venous thrombosis  
45 Deep vein thrombosis of lower extremity due to intravenous drug use  
46 Thromboembolus of artery of upper limb  
47 Thromboembolus of artery of lower limb  
48 Acute DVT (deep vein thrombosis) of left peroneal vein  
49 Acute DVT (deep vein thrombosis) of right peroneal vein  
50 Valvular heart disease  
51 Congenital heart disease  
52 Rheumatic heart disease  
53 Atherosclerotic heart disease  
54  
55  
56  
57  
58  
59  
60



1 Thyrotoxic heart disease  
2 Cerebrovascular disease  
3 Acute pulmonary heart disease  
4 Chronic rheumatic heart disease  
5 Chronic pulmonary heart disease  
6 H/O: heart disease NOS  
7 ECG: myocardial ischaemia NOS  
8 Polycythaemia due to cyanotic heart disease  
9 Cerebral degeneration due to cerebrovascular disease  
10 Other acute rheumatic heart disease  
11 Other acute rheumatic heart disease NOS  
12 Acute rheumatic heart disease  
13 Other specified chronic rheumatic heart disease  
14 Other and unspecified rheumatic heart disease  
15 Rheumatic heart disease unspecified  
16 Other rheumatic heart disease NOS  
17 Chronic rheumatic heart disease NOS  
18 Other acute and subacute ischaemic heart disease  
19 Other acute and subacute ischaemic heart disease NOS  
20 Chronic ischaemic heart disease  
21 Other specified chronic ischaemic heart disease  
22 Other specified chronic ischaemic heart disease NOS  
23 Other chronic ischaemic heart disease NOS  
24 Other specified ischaemic heart disease  
25 Ischaemic heart disease NOS  
26 Acute pulmonary heart disease NOS  
27 Other chronic pulmonary heart disease  
28 Other chronic pulmonary heart disease NOS  
29 Other cerebrovascular disease  
30 Generalised ischaemic cerebrovascular disease NOS  
31 Other cerebrovascular disease OS  
32 Other cerebrovascular disease NOS  
33 Late effects of cerebrovascular disease  
34 Other specified cerebrovascular disease  
35 Cerebrovascular disease NOS  
36 Arteriosclerotic vascular disease NOS  
37 Other specified peripheral vascular disease  
38 Other specified peripheral vascular disease NOS  
39 Peripheral vascular disease NOS  
40 [X]Other acute rheumatic heart disease  
41 [X]Other specified rheumatic heart diseases  
42 [X]Other forms of acute ischaemic heart disease  
43 [X]Other forms of chronic ischaemic heart disease  
44 [X]Other specified pulmonary heart diseases  
45 Heart disease  
46 [X]Cardiovascular disease, unspecified  
47 [X]Other specified cerebrovascular diseases  
48 [X]Other specified peripheral vascular diseases  
49 Male genital organ vascular diseases  
50 Male genital vascular diseases NOS

1  
2 Acyanotic congenital heart disease NOS  
3 Peripheral ischaemic vascular disease  
4 Heart disease during pregnancy  
5 Congenital heart disease in pregnancy  
6 Congenital heart disease, septal and bulbar anomalies  
7  
8 Chronic pulmonary heart disease NOS  
9 Other peripheral vascular disease  
10 H/O: cardiovascular disease  
11 Cyanotic congenital heart disease  
12 Aspirin prophylaxis for ischaemic heart disease  
13 H/O: cerebrovascular disease  
14 H/O: Treatment for ischaemic heart disease  
15 H/O: Peripheral vascular disease procedure  
16 Transient myocardial ischaemia  
17 Asymptomatic coronary heart disease  
18 Renal vascular disease  
19 Ischaemic heart disease  
20 Chronic myocardial ischaemia  
21 Arteriosclerotic heart disease  
22 IHD - Ischaemic heart disease  
23 Congestive heart failure due to valvular disease  
24 Other acute and subacute ischaemic heart disease  
25 On Warfarin and aspirin - IHD prophylaxis  
26 Sequelae/other + unspecified cerebrovascular diseases  
27 Sarcoid heart disease  
28 Heart diseases  
29 Peripheral vascular disease  
30 [X]Cerebrovascular diseases  
31 [X]Chronic rheumatic heart disease  
32 [X]Ischaemic heart diseases  
33 [X]Other cerebrovascular disorders in diseases CE  
34 [X]Other heart disorders in other diseases CE  
35 [X]Other vascular syndroms/brain in cerebrovasculr diseases  
36 [X]Pulmon heart disease & diseases of pulmonary circulation  
37 [X]Sequelae/other + unspecified cerebrovascular diseases  
38 Amyloid heart muscle disease  
39 Arteriosclerotic vascular disease  
40 Atherosclerotic cardiovascular disease  
41 Emergency hospital admission for ischaemic heart disease  
42 ECG myocardial ischaemia  
43 ECG:shows myocardial ischaemia  
44 Diffuse cerebrovascular disease  
45 Heart disease - pulmonary  
46 Acute RH. heart disease NOS  
47 Chronic rheumatic heart diseas  
48 Rheumatic heart disease NOS  
49 Acute/subacute IHD NOS  
50 Pulmonary heart disease  
51 Pulmonary heart disease NOS  
52 Other pulmonary heart disease

1  
2 Peripheral vasc. disease NOS  
3 Peripheral vasc. disease NOS  
4 [RFC] Chronic heart disease (CHD)  
5 [RFC] Congenital heart disease  
6 [RFC] Peripheral vascular disease  
7 [RFC] Coronary heart disease  
8 Mental retardation, congenital heart disease, blepharophimosis, blepharoptosis and hypoplastic teeth  
9  
10 Rheumatic heart disease NOS  
11 Small vessel cerebrovascular disease  
12 H/O: coronary heart disease  
13 Coronary heart disease confirmed  
14 On coronary heart disease register  
15 Coronary microvascular disease  
16 Heart valve disease  
17 CHD - Congenital heart disease  
18 Vascular disease  
19 Cardiovascular renal disease  
20 Congestive heart disease  
21 Coloboma, congenital heart disease, choanal atresia, growth retardation, genital hypoplasia, ear and hearing a  
22 Cardiovascular disease  
23 CVD - cardiovascular disease  
24 CAD - Coronary artery disease  
25 CHD - Coronary heart disease  
26 Coronary heart disease  
27 CVD - Cerebrovascular disease  
28 Ischaemic heart disease - angina  
29 Sarcoid heart muscle disease  
30 Sequelae of cerebrovascular disease  
31 Asymptomatic cerebrovascular disease  
32 Peripheral ischemic vascular disease  
33 History of cardiovascular disease  
34 History of treatment for ischaemic heart disease  
35 PVD-peripheral vascular disease  
36 Acute ischaemic heart disease  
37 Acute myocardial ischaemia  
38 Chronic ischemic heart disease  
39 Ischemic heart disease  
40 IHD - Ischemic heart disease  
41 Myocardial ischaemia  
42 Mixed myocardial ischaemia and infarction  
43 Heart failure due to end stage congenital heart disease  
44 History of peripheral vascular disease  
45 Heart failure with reduced ejection fraction due to coronary artery disease  
46 Heart failure with reduced ejection fraction due to heart valve disease  
47 Subacute ischaemic heart disease  
48 Peripheral vascular disease associated with another disorder  
49 Visual disturbance as sequela of cerebrovascular disease  
50 Intellectual disability, congenital heart disease, blepharophimosis, blepharoptosis and hypoplastic teeth  
51 Peripheral arterial vascular disease  
52 Myocardial infarction due to demand ischaemia

1  
2 Pulmonary heart disease  
3 Congenital heart disease  
4 Congenital cardiospasm  
5 Congenital heart block  
6 Congenital cardiomegaly  
7 Congenital heart block, unspecified  
8 Congenital heart block NOS  
9 Congenital anomaly of myocardium  
10 Congenital aneurysm of heart  
11 Congenital epicardial cyst  
12 Congenital anomaly of heart valve  
13 Acyanotic congenital heart disease NOS  
14 Congenital heart anomaly NOS  
15 [X]Other congenital malformations of cardiac septa  
16 [X]Other specified congenital malformations of the heart  
17 Congenital cardiac failure  
18 Congenital heart disease in pregnancy  
19 Congenital insufficiency of heart valve NEC  
20 Congenital heart disease, septal and bulbar anomalies  
21 Congenital absence of pericardium  
22 Cyanotic congenital heart disease  
23 Congenital anomaly of cardiovascular system  
24 Congenital conductive hearing loss  
25 [X]Congenital malforms of cardiac chambers+connections unsp  
26 Congenital cardiovasc dis - unsp whether in preg/puerperium  
27 Congenital cardiovascular disorder during pregnancy - baby delivered  
28 Congenital cardiovascular disorder during pregnancy - baby not yet delivered  
29 Congenital cardiovascular disorder in the puerperium - baby delivered during current episode of care  
30 Congenital cardiovascular disorder in the puerperium - baby delivered during previous episode of care  
31 Congenital cardiovascular disorder in preg/childb/puerp NOS  
32 Congenital cardiovascular disorders during pregnancy, childbirth and the puerperium  
33 Congenital complete atrioventricular heart block  
34 Congenital heart anomaly NOS  
35 Congenital incomplete atrio-ventricular heart block  
36 Congenital malforms of cardiac chambers+connections unsp  
37 Congenital dextroposition of heart  
38 [RFC] Chronic heart disease (CHD)  
39 [RFC] Congenital heart disease  
40 Mental retardation, congenital heart disease, blepharophimosis, blepharoptosis and hypoplastic teeth  
41 Percutaneous transluminal ablation of congenital heart malformation  
42 Congenital anomaly of heart  
43 CHD - Congenital heart disease  
44 Coloboma, congenital heart disease, choanal atresia, growth retardation, genital hypoplasia, ear and hearing a  
45 Congenital atresia of cardiac vein  
46 Congenital malposition of cardiac apex  
47 CHD - Coronary heart disease  
48 Congenital incomplete atrioventricular heart block  
49 Congenital abnormality of cardiac connection  
50 Heart failure due to end stage congenital heart disease  
51 Congenital anomaly of cardiac chamber  
52

1 Intellectual disability, congenital heart disease, blepharophimosis, blepharoptosis and hypoplastic teeth  
2 Acute congestive heart failure  
3 Congestive heart failure  
4 Acute heart failure  
5 Heart failure  
6 Cardiac failure  
7 Chronic congestive heart failure  
8 Right heart failure  
9 H/O: heart failure  
10 Hypertensive heart and renal disease with renal failure  
11 Decompensated cardiac failure  
12 Compensated cardiac failure  
13 Post cardiac operation heart failure NOS  
14 Cardiac failure following abortive pregnancy  
15 Cardiorespiratory failure  
16 Heart transplant failure and rejection  
17 Heart-lung transplant failure and rejection  
18 Cardiorespiratory failure as a complication of care  
19 Heart failure as a complication of care  
20 Heart failure NOS  
21 Neonatal cardiac failure  
22 Cardiac failure therapy  
23 H/O: Heart failure in last year  
24 Congestive cardiac failure  
25 Biventricular congestive heart failure  
26 Heart failure confirmed  
27 Emergency hospital admission for heart failure  
28 Congestive heart failure due to valvular disease  
29 Cardiac failure NOS  
30 Benign hypertensive heart disease with congestive cardiac failure  
31 Benign hypertensive heart disease without CCF  
32 Malignant hypertensive heart disease with congestive cardiac failure  
33 Malignant hypertensive heart disease without congestive heart failure  
34 Hypertensive heart disease NOS with CCF  
35 Hypertensive heart disease NOS without CCF  
36 Hypertensive heart and renal disease with (congestive) heart failure  
37 Hypertensive heart and renal disease with both (congestive) heart failure and renal failure  
38 [RFC] Cardiac failure  
39 Heart failure with normal ejection fraction  
40 HFNEF - heart failure with normal ejection fraction  
41 Emergency heart failure admission since last appointment  
42 Heart failure with preserved ejection fraction  
43 On optimal heart failure therapy  
44 Acute left heart failure  
45 Chronic left-sided congestive heart failure  
46 High output heart failure  
47 Chronic right-sided heart failure  
48 Congestive cardiac failure  
49 CCF - Congestive cardiac failure  
50 CHF - Congestive heart failure

1  
2 Right heart failure secondary to left heart failure  
3 Hypertensive heart failure  
4 Chronic heart failure  
5 Hypertensive heart disease without congestive heart failure  
6 Chronic right-sided congestive heart failure  
7 HF - Heart failure  
8 Left heart failure  
9 Left-sided heart failure  
10 Chronic left-sided heart failure  
11 History of heart failure  
12 Refractory heart failure  
13 Acute right-sided heart failure  
14 Systolic heart failure  
15 Diastolic heart failure  
16 Decompensated chronic heart failure  
17 Right heart failure due to pulmonary hypertension  
18 Congestive heart failure due to left ventricular systolic dysfunction  
19 Chronic systolic heart failure  
20 Chronic diastolic heart failure  
21 Heart failure with preserved ejection fraction  
22 Acute exacerbation of chronic congestive heart failure  
23 Symptomatic congestive heart failure  
24 Heart failure with reduced ejection fraction  
25 Heart failure with reduced ejection fraction due to coronary artery disease  
26 Heart failure with reduced ejection fraction due to myocarditis  
27 Heart failure with reduced ejection fraction due to cardiomyopathy  
28 Heart failure with reduced ejection fraction due to heart valve disease  
29 Congestive heart failure with right heart failure  
30 Exacerbation of congestive heart failure  
31 Chronic combined systolic and diastolic heart failure  
32 Heart failure with mid range ejection fraction  
33 Low output heart failure due to and following Fontan operation  
34 Acute on chronic right-sided congestive heart failure  
35  
36  
37  
38  
39  
40  
41  
42  
43  
44  
45  
46  
47  
48  
49  
50  
51  
52  
53  
54  
55  
56  
57  
58  
59  
60

1  
2  
3  
4  
5  
6  
7  
8  
9  
10  
11  
12  
13  
14  
15  
16  
17  
18  
19  
20  
21  
22  
23  
24  
25  
26  
27  
28  
29  
30  
31  
32  
33  
34  
35  
36  
37  
38  
39  
40  
41  
42  
43  
44  
45  
46  
47  
48  
49  
50  
51  
52  
53  
54  
55  
56  
57  
58  
59  
60

For peer review only

1  
2  
3  
4  
5  
6  
7  
8  
9  
10  
11  
12  
13  
14  
15  
16  
17  
18  
19  
20  
21  
22  
23  
24  
25  
26  
27  
28  
29  
30  
31  
32  
33  
34  
35  
36  
37  
38  
39  
40  
41  
42  
43  
44  
45  
46  
47  
48  
49  
50  
51  
52  
53  
54  
55  
56  
57  
58  
59  
60

For peer review only



1  
2  
3  
4  
5  
6  
7  
8  
9  
10  
11  
12  
13  
14  
15  
16  
17  
18  
19  
20  
21  
22  
23  
24  
25  
26  
27  
28  
29  
30  
31  
32  
33  
34  
35  
36  
37  
38  
39  
40  
41  
42  
43  
44  
45  
46  
47  
48  
49  
50  
51  
52  
53  
54  
55  
56  
57  
58  
59  
60

For peer review only

1  
2  
3  
4  
5  
6  
7  
8  
9  
10  
11  
12  
13  
14  
15  
16  
17  
18  
19  
20  
21  
22  
23  
24  
25  
26  
27  
28  
29  
30  
31  
32  
33  
34  
35  
36  
37  
38  
39  
40  
41  
42  
43  
44  
45  
46  
47  
48  
49  
50  
51  
52  
53  
54  
55  
56  
57  
58  
59  
60

For peer review only

1  
2  
3  
4  
5  
6  
7  
8  
9  
10  
11  
12  
13  
14  
15  
16  
17  
18  
19  
20  
21  
22  
23  
24  
25  
26  
27  
28  
29  
30  
31  
32  
33  
34  
35  
36  
37  
38  
39  
40  
41  
42  
43  
44  
45  
46  
47  
48  
49  
50  
51  
52  
53  
54  
55  
56  
57  
58  
59  
60

For peer review only

1  
2  
3  
4  
5  
6  
7  
8  
9  
10  
11  
12  
13  
14  
15  
16  
17  
18  
19  
20  
21  
22  
23  
24  
25  
26  
27  
28  
29  
30  
31  
32  
33  
34  
35  
36  
37  
38  
39  
40  
41  
42  
43  
44  
45  
46  
47  
48  
49  
50  
51  
52  
53  
54  
55  
56  
57  
58  
59  
60

For peer review only

1  
2  
3  
4  
5  
6  
7  
8  
9  
10  
11  
12  
13  
14  
15  
16  
17  
18  
19  
20  
21  
22  
23  
24  
25  
26  
27  
28  
29  
30  
31  
32  
33  
34  
35  
36  
37  
38  
39  
40  
41  
42  
43  
44  
45  
46  
47  
48  
49  
50  
51  
52  
53  
54  
55  
56  
57  
58  
59  
60

For peer review only

1  
2  
3  
4  
5  
6  
7  
8  
9  
10  
11  
12  
13  
14  
15  
16  
17  
18  
19  
20  
21  
22  
23  
24  
25  
26  
27  
28  
29  
30  
31  
32  
33  
34  
35  
36  
37  
38  
39  
40  
41  
42  
43  
44  
45  
46  
47  
48  
49  
50  
51  
52  
53  
54  
55  
56  
57  
58  
59  
60

For peer review only

1  
2  
3  
4  
5  
6  
7  
8  
9  
10  
11  
12  
13  
14  
15  
16  
17  
18  
19  
20  
21  
22  
23  
24  
25  
26  
27  
28  
29  
30  
31  
32  
33  
34  
35  
36  
37  
38  
39  
40  
41  
42  
43  
44  
45  
46  
47  
48  
49  
50  
51  
52  
53  
54  
55  
56  
57  
58  
59  
60

For peer review only

1  
2  
3  
4  
5  
6  
7  
8  
9  
10  
11  
12  
13  
14  
15  
16  
17  
18  
19  
20  
21  
22  
23  
24  
25  
26  
27  
28  
29  
30  
31  
32  
33  
34  
35  
36  
37  
38  
39  
40  
41  
42  
43  
44  
45  
46  
47  
48  
49  
50  
51  
52  
53  
54  
55  
56  
57  
58  
59  
60

For peer review only



1  
2  
3  
4  
5  
6  
7  
8  
9  
10  
11  
12  
13  
14  
15  
16  
17  
18  
19  
20  
21  
22  
23  
24  
25  
26  
27  
28  
29  
30  
31  
32  
33  
34  
35  
36  
37  
38  
39  
40  
41  
42  
43  
44  
45  
46  
47  
48  
49  
50  
51  
52  
53  
54  
55  
56  
57  
58  
59  
60

For peer review only

1  
2  
3  
4  
5  
6  
7  
8  
9  
10  
11  
12  
13  
14  
15  
16  
17  
18  
19  
20  
21  
22  
23  
24  
25  
26  
27  
28  
29  
30  
31  
32  
33  
34  
35  
36  
37  
38  
39  
40  
41  
42  
43  
44  
45  
46  
47  
48  
49  
50  
51  
52  
53  
54  
55  
56  
57  
58  
59  
60

For peer review only

1  
2  
3  
4  
5  
6  
7  
8  
9  
10  
11  
12  
13  
14  
15  
16  
17  
18  
19  
20  
21  
22  
23  
24  
25  
26  
27  
28  
29  
30  
31  
32  
33  
34  
35  
36  
37  
38  
39  
40  
41  
42  
43  
44  
45  
46  
47  
48  
49  
50  
51  
52  
53  
54  
55  
56  
57  
58  
59  
60

For peer review only

1  
2  
3  
4  
5  
6  
7  
8  
9  
10  
11  
12  
13  
14  
15  
16  
17  
18  
19  
20  
21  
22  
23  
24  
25  
26  
27  
28  
29  
30  
31  
32  
33  
34  
35  
36  
37  
38  
39  
40  
41  
42  
43  
44  
45  
46  
47  
48  
49  
50  
51  
52  
53  
54  
55  
56  
57  
58  
59  
60

For peer review only

1  
2  
3  
4  
5  
6  
7  
8  
9  
10  
11  
12  
13  
14  
15  
16  
17  
18  
19  
20  
21  
22  
23  
24  
25  
26  
27  
28  
29  
30  
31  
32  
33  
34  
35  
36  
37  
38  
39  
40  
41  
42  
43  
44  
45  
46  
47  
48  
49  
50  
51  
52  
53  
54  
55  
56  
57  
58  
59  
60

For peer review only

1  
2  
3  
4  
5  
6  
7  
8  
9  
10  
11  
12  
13  
14  
15  
16  
17  
18  
19  
20  
21  
22  
23  
24  
25  
26  
27  
28  
29  
30  
31  
32  
33  
34  
35  
36  
37  
38  
39  
40  
41  
42  
43  
44  
45  
46  
47  
48  
49  
50  
51  
52  
53  
54  
55  
56  
57  
58  
59  
60

For peer review only

1  
2  
3  
4  
5  
6  
7  
8  
9  
10  
11  
12  
13  
14  
15  
16  
17  
18  
19  
20  
21  
22  
23  
24  
25  
26  
27  
28  
29  
30  
31  
32  
33  
34  
35  
36  
37  
38  
39  
40  
41  
42  
43  
44  
45  
46  
47  
48  
49  
50  
51  
52  
53  
54  
55  
56  
57  
58  
59  
60

For peer review only

1  
2  
3  
4  
5  
6  
7  
8  
9  
10  
11  
12  
13  
14  
15  
16  
17  
18  
19  
20  
21  
22  
23  
24  
25  
26  
27  
28  
29  
30  
31  
32  
33  
34  
35  
36  
37  
38  
39  
40  
41  
42  
43  
44  
45  
46  
47  
48  
49  
50  
51  
52  
53  
54  
55  
56  
57  
58  
59  
60

For peer review only



1  
2  
3  
4  
5  
6  
7  
8  
9  
10  
11  
12  
13  
14  
15  
16  
17  
18  
19  
20  
21  
22  
23  
24  
25  
26  
27  
28  
29  
30  
31  
32  
33  
34  
35  
36  
37  
38  
39  
40  
41  
42  
43  
44  
45  
46  
47  
48  
49  
50  
51  
52  
53  
54  
55  
56  
57  
58  
59  
60

For peer review only

1  
2  
3  
4  
5  
6  
7  
8  
9  
10  
11  
12  
13  
14  
15  
16  
17  
18  
19  
20  
21  
22  
23  
24  
25  
26  
27  
28  
29  
30  
31  
32  
33  
34  
35  
36  
37  
38  
39  
40  
41  
42  
43  
44  
45  
46  
47  
48  
49  
50  
51  
52  
53  
54  
55  
56  
57  
58  
59  
60

For peer review only

1  
2  
3  
4  
5  
6  
7  
8  
9  
10  
11  
12  
13  
14  
15  
16  
17  
18  
19  
20  
21  
22  
23  
24  
25  
26  
27  
28  
29  
30  
31  
32  
33  
34  
35  
36  
37  
38  
39  
40  
41  
42  
43  
44  
45  
46  
47  
48  
49  
50  
51  
52  
53  
54  
55  
56  
57  
58  
59  
60

For peer review only

1  
2  
3  
4  
5  
6  
7  
8  
9  
10  
11  
12  
13  
14  
15  
16  
17  
18  
19  
20  
21  
22  
23  
24  
25  
26  
27  
28  
29  
30  
31  
32  
33  
34  
35  
36  
37  
38  
39  
40  
41  
42  
43  
44  
45  
46  
47  
48  
49  
50  
51  
52  
53  
54  
55  
56  
57  
58  
59  
60

For peer review only

1  
2  
3  
4  
5  
6  
7  
8  
9  
10  
11  
12  
13  
14  
15  
16  
17  
18  
19  
20  
21  
22  
23  
24  
25  
26  
27  
28  
29  
30  
31  
32  
33  
34  
35  
36  
37  
38  
39  
40  
41  
42  
43  
44  
45  
46  
47  
48  
49  
50  
51  
52  
53  
54  
55  
56  
57  
58  
59  
60

For peer review only

1  
2  
3  
4  
5  
6  
7  
8  
9  
10  
11  
12  
13  
14  
15  
16  
17  
18  
19  
20  
21  
22  
23  
24  
25  
26  
27  
28  
29  
30  
31  
32  
33  
34  
35  
36  
37  
38  
39  
40  
41  
42  
43  
44  
45  
46  
47  
48  
49  
50  
51  
52  
53  
54  
55  
56  
57  
58  
59  
60

For peer review only

1  
2  
3  
4  
5  
6  
7  
8  
9  
10  
11  
12  
13  
14  
15  
16  
17  
18  
19  
20  
21  
22  
23  
24  
25  
26  
27  
28  
29  
30  
31  
32  
33  
34  
35  
36  
37  
38  
39  
40  
41  
42  
43  
44  
45  
46  
47  
48  
49  
50  
51  
52  
53  
54  
55  
56  
57  
58  
59  
60

For peer review only

1  
2  
3  
4  
5  
6  
7  
8  
9  
10  
11  
12  
13  
14  
15  
16  
17  
18  
19  
20  
21  
22  
23  
24  
25  
26  
27  
28  
29  
30  
31  
32  
33  
34  
35  
36  
37  
38  
39  
40  
41  
42  
43  
44  
45  
46  
47  
48  
49  
50  
51  
52  
53  
54  
55  
56  
57  
58  
59  
60

For peer review only



1  
2  
3  
4  
5  
6  
7  
8  
9  
10  
11  
12  
13  
14  
15  
16  
17  
18  
19  
20  
21  
22  
23  
24  
25  
26  
27  
28  
29  
30  
31  
32  
33  
34  
35  
36  
37  
38  
39  
40  
41  
42  
43  
44  
45  
46  
47  
48  
49  
50  
51  
52  
53  
54  
55  
56  
57  
58  
59  
60

For peer review only

1  
2  
3  
4  
5  
6  
7  
8  
9  
10  
11  
12  
13  
14  
15  
16  
17  
18  
19  
20  
21  
22  
23  
24  
25  
26  
27  
28  
29  
30  
31  
32  
33  
34  
35  
36  
37  
38  
39  
40  
41  
42  
43  
44  
45  
46  
47  
48  
49  
50  
51  
52  
53  
54  
55  
56  
57  
58  
59  
60

For peer review only

1  
2  
3  
4  
5  
6  
7  
8  
9  
10  
11  
12  
13  
14  
15  
16  
17  
18  
19  
20  
21  
22  
23  
24  
25  
26  
27  
28  
29  
30  
31  
32  
33  
34  
35  
36  
37  
38  
39  
40  
41  
42  
43  
44  
45  
46  
47  
48  
49  
50  
51  
52  
53  
54  
55  
56  
57  
58  
59  
60

ick) score

For peer review only

|    |             |
|----|-------------|
| 1  |             |
| 2  | ICD-10 Code |
| 3  | I25.3       |
| 4  | I72.8       |
| 5  | I72         |
| 6  | I72.9       |
| 7  | I77.0       |
| 8  | I77.0       |
| 9  | Q27.3       |
| 10 | I67.1       |
| 11 | I25.4       |
| 12 | H35.0       |
| 13 | I60.7       |
| 14 | I77.0       |
| 15 | I77.74      |
| 16 | I28.1       |
| 17 | A52.01      |
| 18 | I72.4       |
| 19 | I72.1       |
| 20 | I72.2       |
| 21 | I71.6       |
| 22 | I71         |
| 23 | I71.1       |
| 24 | I71.3       |
| 25 | I71.3       |
| 26 | Q25.43      |
| 27 | I71.2       |
| 28 | I71.4       |
| 29 | I72.3       |
| 30 | I70.0       |
| 31 | I72.9       |
| 32 | I71.8       |
| 33 | I79.0       |
| 34 | I25.41      |
| 35 | I72.5       |
| 36 | I71.9       |
| 37 | I71.60      |
| 38 | I71.62      |
| 39 | H11.41      |
| 40 | I71.11      |
| 41 | I71.12      |
| 42 | I72.6       |
| 43 | I71.10      |
| 44 | I71.13      |
| 45 | I71.21      |
| 46 | I71.22      |
| 47 | I71.30      |
| 48 | I71.31      |
| 49 | I71.31      |
| 50 | I71.32      |
| 51 | I71.33      |
| 52 | I71.50      |
| 53 | I71.51      |
| 54 | I71.51      |
| 55 | I71.52      |
| 56 | I71.52      |
| 57 | I71.52      |
| 58 | I71.52      |
| 59 | I71.52      |
| 60 | I71.52      |

For peer review only

1  
2 I25.42  
3 I71.20  
4 I71.23  
5 I71.40  
6 I71.41  
7 I71.42  
8 I71.43  
9 I71.61  
10 I77.0  
11 Q27.8  
12 Q24.5  
13 Q27.8  
14 Q25.79  
15 Q14.1  
16 I72.0  
17 I72.5  
18 I72.6  
19 A52.05  
20 Q20.2  
21 I77.3  
22 I78.0  
23 I67.7  
24 I70.218  
25 I70.211  
26 I70.212  
27 I70.213  
28 I70.219  
29 I70.311  
30 I70.312  
31 I70.313  
32 I70.21  
33 I70.31  
34 I70.41  
35 I70.51  
36 I70.61  
37 I70.611  
38 I70.612  
39 I70.613  
40 I70.618  
41 I70.619  
42 I70.71  
43 I70.318  
44 I70.319  
45 I70.411  
46 I70.412  
47 I70.413  
48 I70.418  
49 I70.419  
50 I70.511  
51 I70.512

For peer review only

1  
2 I70.513  
3 I70.518  
4 I70.519  
5 I70.711  
6 I70.712  
7 I70.713  
8 I70.718  
9 I70.719  
10 I70.719  
11 I87  
12 I87.0  
13 I71  
14 I71.0  
15 I77.1  
16 I77.2  
17 I77.7  
18 I25.4  
19 I67.0  
20 I70  
21 I70.0  
22 I70.1  
23 I12  
24 I70.2  
25 I70.8  
26 I70.9  
27 I25.0  
28 I25.1  
29 Q23.0  
30 Q25.2  
31 Q25.3  
32 I36.0  
33 I36.2  
34 I37.0  
35 I37.2  
36 I42.1  
37 I34.2  
38 I35.0  
39 I35.2  
40 I60  
41 I60.0  
42 I60.1  
43 I60.2  
44 I60.3  
45 I60.4  
46 I60.5  
47 I60.6  
48 I60.7  
49 I60.8  
50 I60.9  
51 I69.0  
52 I61

For peer review only

1  
2 I61.0  
3 I61.1  
4 I61.2  
5 I61.3  
6 I61.4  
7 I61.5  
8 I61.6  
9 I61.8  
10 I61.9  
11 I62  
12 I62.0  
13 I62.1  
14 I62.9  
15 I69.1  
16 I69.2  
17 I69.3  
18 I69.4  
19 I69.8  
20 F01.0  
21 F01  
22 F01.2  
23 F01.3  
24 F01.8  
25 F01.9  
26 I77.6  
27 I26  
28 I26.0  
29 I26.9  
30 I48.3  
31 I48.4  
32 I48.9  
33 I49.0  
34 I49  
35 I49.8  
36 I49.9  
37 I21  
38 I21.0  
39 I21.1  
40 I21.2  
41 I21.3  
42 I21.4  
43 I21.9  
44 I22.0  
45 I22.1  
46 I22.8  
47 I22.9  
48  
49  
50  
51  
52  
53  
54  
55  
56  
57  
58  
59  
60

For peer review only

1  
2 Medcodeid  
3 3528309015  
4 618411000000118  
5 618421000000112  
6 618431000000114  
7 618441000000117  
8 618451000000119  
9 618461000000116  
10 618471000000111  
11 618481000000113  
12 618491000000110  
13 618501000000116  
14 618511000000119  
15 618521000000113  
16 1854991000006119  
17 1940501000006119  
18 1940511000006116  
19 1940521000006112  
20 1940531000006110  
21 1940541000006117  
22 1940551000006115  
23 1940571000006113  
24 1940581000006111  
25 1940591000006114  
26 1940601000006118  
27 1940611000006115  
28 1940621000006111  
29 1940631000006114  
30 1940641000006116  
31 1940651000006119  
32 1940661000006117  
33 1940671000006112  
34 7147761000006113  
35 7147781000006115  
36 7174791000006111  
37 7174851000006111  
38 7643311000006115  
39 8104231000006115  
40 8104261000006112  
41 8104301000006115  
42 8104381000006112  
43 8104451000006111  
44 8104551000006112  
45 1409014  
46 64282015  
47 108730018  
48 109700019  
49 110659019  
50 143003017  
51 293759015

For peer review only



1 299665018  
2 299673010  
3 299675015  
4 354521013  
5 354537019  
6 395753015  
7 213101000006114  
8 21552100000116  
9 581531000006115  
10 641491000006116  
11 741701000006114  
12 789941000006117  
13 811521000006115  
14 886721000006116  
15 3013481000006111  
16 3245871000006111  
17 3902031000006117  
18 3974181000006119  
19 5063361000006117  
20 5063371000006112  
21 5095431000006117  
22 7615371000006117  
23 7643331000006114  
24 7854191000006115  
25 12051941000006113  
26 12704471000006116  
27 278834012  
28 278835013  
29 303951011  
30 305192017  
31 354417015  
32 356557018  
33 394639018  
34 396711013  
35 402249011  
36 403109016  
37 454255014  
38 509111010  
39 424731000006111  
40 480871000006117  
41 619541000006116  
42 641471000006117  
43 886631000006110  
44 887731000006115  
45 906301000006115  
46 3183501000006111  
47 3245851000006118  
48 3245861000006116  
49 3245881000006114  
50 3331291000006117

For peer review only

1  
2 3973811000006118  
3 3973841000006119  
4 5094141000006118  
5 5094161000006119  
6 5094171000006114  
7 7043231000006112  
8 7841541000006119  
9  
10 300871017  
11 303943013  
12 303949012  
13 303960015  
14 303960015  
15 396713011  
16 2159984015  
17 84921000006110  
18 177341000006111  
19 424791000006110  
20 913841000006116  
21 914031000006118  
22 3974161000006112  
23 7484781000006119  
24 314302019  
25 314306016  
26 314307013  
27 315750010  
28 354317019  
29 400870015  
30 400871016  
31 411547015  
32 483965010  
33 505126019  
34 1226060014  
35 2767154014  
36 2767384012  
37 2767385013  
38 2771041011  
39 2773184015  
40 3527814014  
41 304051000000112  
42 304071000000115  
43 304091000000116  
44 304111000000114  
45 406821000000110  
46 407481000000111  
47 408261000000119  
48 408281000000111  
49 408301000000112  
50 408321000000115  
51 408341000000110  
52 408381000000119  
53 526441000000118  
54  
55  
56  
57  
58  
59  
60

For peer review only

1 557811000000119  
2 557831000000110  
3 595541000000119  
4 595661000000119  
5 595721000000116  
6 595811000000117  
7 595871000000110  
8 595931000000116  
9 595991000000115  
10 596051000000115  
11 596131000000114  
12 596191000000110  
13 596261000000111  
14 596321000000110  
15 596401000000111  
16 893231000006117  
17 994391000006115  
18 994411000006115  
19 994421000006111  
20 994441000006116  
21 999981000006116  
22 999991000006118  
23 1000001000006114  
24 1823941000006114  
25 1825111000006112  
26 1850891000006119  
27 1856481000006117  
28 2002941000006114  
29 2002961000006113  
30 2002971000006118  
31 2002981000006115  
32 2115881000000117  
33 2117811000000117  
34 2962391000006111  
35 2962421000006115  
36 3245841000006115  
37 3842511000006119  
38 4827551000006116  
39 5335381000006115  
40 5335401000006115  
41 5335421000006113  
42 5335431000006111  
43 5574511000006116  
44 7480371000006113  
45 7615331000006115  
46 7615361000006112  
47 7714891000006118  
48 7714921000006112  
49 7966611000006114  
50 7966641000006113

For peer review only

1  
2 796669100006116  
3 796676100006115  
4 802749100006113  
5 803042100006114  
6 803043100006112  
7 803044100006119  
8 804066100006119  
9 804068100006112  
10 804069100006110  
11 804069100006110  
12 804406100006119  
13 821240100006115  
14 821471100006116  
15 821884100006117  
16 821912100006112  
17 834593100006110  
18 834600100006110  
19 834602100006117  
20 1202993100006117  
21 1417432100006116  
22 354316011  
23 324973015  
24 181658100006110  
25 710351100006119  
26 136885015  
27 377976016  
28 1406758100006118  
29 329116017  
30 38464100006114  
31 71361100006110  
32  
33  
34  
35  
36  
37  
38  
39  
40  
41  
42  
43  
44  
45  
46  
47  
48  
49  
50  
51  
52  
53  
54  
55  
56  
57  
58  
59  
60

For peer review only

1  
2 Term

3 MCKD - Multicystic kidney disease

4 CKD stage 2 with proteinuria

5 CKD stage 2 without proteinuria

6 CKD stage 3 with proteinuria

7 CKD stage 3 without proteinuria

8 CKD stage 3A with proteinuria

9 CKD stage 3A without proteinuria

10 CKD stage 3B with proteinuria

11 CKD stage 3B without proteinuria

12 CKD stage 4 with proteinuria

13 CKD stage 4 without proteinuria

14 CKD stage 5 with proteinuria

15 CKD stage 5 without proteinuria

16 EGFR 3 month repeat test for CKD confirmatory

17 CKD G4A1 - chronic kidney disease with glomerular filtration rate category G4 and albuminuria category A1

18 CKD G4A2 - chronic kidney disease with glomerular filtration rate category G4 and albuminuria category A2

19 CKD G4A3 - chronic kidney disease with glomerular filtration rate category G4 and albuminuria category A3

20 CKD G5A1 - chronic kidney disease with glomerular filtration rate category G5 and albuminuria category A1

21 CKD G5A2 - chronic kidney disease with glomerular filtration rate category G5 and albuminuria category A2

22 CKD G5A3 - chronic kidney disease with glomerular filtration rate category G5 and albuminuria category A3

23 CKD G1A2 - chronic kidney disease with glomerular filtration rate category G1 and albuminuria category A2

24 CKD G1A3 - chronic kidney disease with glomerular filtration rate category G1 and albuminuria category A3

25 CKD G2A1 - chronic kidney disease with glomerular filtration rate category G2 and albuminuria category A1

26 CKD G2A2 - chronic kidney disease with glomerular filtration rate category G2 and albuminuria category A2

27 CKD G2A3 - chronic kidney disease with glomerular filtration rate category G2 and albuminuria category A3

28 CKD G3aA1 - chronic kidney disease with glomerular filtration rate category G3a and albuminuria category /

29 CKD G3aA2 - chronic kidney disease with glomerular filtration rate category G3a and albuminuria category /

30 CKD G3aA3 - chronic kidney disease with glomerular filtration rate category G3a and albuminuria category /

31 CKD G3bA1 - chronic kidney disease with glomerular filtration rate category G3b and albuminuria category /

32 CKD G3bA2 - chronic kidney disease with glomerular filtration rate category G3b and albuminuria category /

33 CKD G3bA3 - chronic kidney disease with glomerular filtration rate category G3b and albuminuria category /

34 CKD stage 2

35 CKD stage 4

36 CKD stage 3

37 CKD stage 5

38 CKD - chronic kidney disease

39 CKD (chronic kidney disease) stage 3 with proteinuria

40 CKD (chronic kidney disease) stage 3 without proteinuria

41 CKD (chronic kidney disease) stage 3A with proteinuria

42 CKD (chronic kidney disease) stage 3B with proteinuria

43 CKD (chronic kidney disease) stage 4 with proteinuria

44 CKD (chronic kidney disease) stage 5 without proteinuria

45 Benign hypertensive renal disease

46 Hypertensive renal disease

47 Malignant hypertensive renal disease

48 Benign hypertensive heart AND renal disease

49 Malignant hypertensive heart AND renal disease

50 Hypertensive heart AND renal disease

51 Diabetic renal disease

1 Hypertensive renal disease with renal failure  
2 Hypertensive heart and renal disease with renal failure  
3 Hypertensive heart and renal disease NOS  
4 Renal involvement in malignant disease  
5 Chronic drug-induced renal disease  
6 Hypertensive renal disease NOS  
7 Pre-existing hypertensive heart and renal disease complicating pregnancy, childbirth and the puerperium  
8 End stage renal disease  
9 Congenital cystic renal disease  
10 End-stage renal disease  
11 Hypertensive heart and renal disease with (congestive) heart failure  
12 Hypertensive heart and renal disease with both (congestive) heart failure and renal failure  
13 H/O: renal disease  
14 Renal disease NOS  
15 Cardiovascular renal disease  
16 ESRD - End stage renal disease  
17 Cardiorenal disease  
18 Renal disease  
19 Anaemia of renal disease  
20 Anemia of renal disease  
21 Renal disorders in inherited disease  
22 Anaemia in end stage renal disease  
23 Chronic renal disease  
24 HDR (hypoparathyroidism, sensorineural deafness, renal disease) syndrome  
25 Renal parenchymal disease  
26 End-stage renal disease  
27 Other specified compensation for renal failure  
28 Compensation for renal failure NOS  
29 Renal function impairment with growth failure  
30 [X]Other chronic renal failure  
31 Acute-on-chronic renal failure  
32 Renal failure-associated hyperphosphataemia  
33 Compensation for renal failure  
34 RF - Renal failure  
35 Congenital renal failure  
36 Renal failure as a complication of care  
37 Anaemia secondary to renal failure  
38 Chronic renal failure  
39 Renal failure  
40 Anaemia of chronic renal failure  
41 Dialysis for renal failure  
42 End stage renal failure  
43 Renal failure NOS  
44 Renal failure  
45 [RFC] Renal probs including renal failure  
46 Renal failure syndrome  
47 ESRF - End stage renal failure  
48 ESCRF - End stage chronic renal failure  
49 End stage chronic renal failure  
50 Hepatorenal failure

1  
2 Chronic renal failure syndrome  
3 CRF - Chronic renal failure  
4 Acute on chronic renal failure  
5 End stage renal failure on dialysis  
6 End stage renal failure with renal transplant  
7 Chronic progressive renal failure  
8 Renal insufficiency  
9  
10 [X]Hypertension secondary to other renal disorders  
11 Impaired renal function disorder  
12 Other impaired renal function disorder  
13 Impaired renal function disorder NOS  
14 Other impaired renal function disorder NOS  
15 Renal disorder education  
16 Renal disorder due to type 2 diabetes mellitus  
17 Renal tubulo-interstitial disorders in transplant rejection  
18 [X]Renal tubulo-interstitial disorders/transplant rejection  
19 Renal disorder associated with type 1 diabetes mellitus  
20 Renal disorder associated with type II diabetes mellitus  
21 Renal disorder  
22 Renal disorder medication review  
23 Congenital cystic kidney disease  
24 Other congenital cystic kidney disease NOS  
25 Congenital cystic kidney disease NOS  
26 Cystic kidney disease  
27 Kidney disease  
28 Polycystic kidney disease NOS  
29 Fibrocystic kidney disease  
30 H/O: kidney disease  
31 Autosomal dominant polycystic kidney disease  
32 Polycystic kidney disease  
33 Autosomal recessive polycystic kidney disease  
34 Chronic kidney disease stage 5  
35 Chronic kidney disease stage 2  
36 Chronic kidney disease stage 4  
37 Chronic kidney disease  
38 Chronic kidney disease stage 3  
39 Chronic kidney disease clinical management plan  
40 Chronic kidney disease stage 2  
41 Chronic kidney disease stage 3  
42 Chronic kidney disease stage 4  
43 Chronic kidney disease stage 5  
44 Chronic kidney disease monitoring administration  
45 Chronic kidney disease monitoring  
46 Chronic kidney disease monitoring first letter  
47 Chronic kidney disease monitoring second letter  
48 Chronic kidney disease monitoring third letter  
49 Chronic kidney disease monitoring verbal invite  
50 Chronic kidney disease monitoring telephone invite  
51 Chronic kidney disease annual review  
52 Did not attend chronic kidney disease monitoring clinic  
53  
54  
55  
56  
57  
58  
59  
60

1  
2 Chronic kidney disease stage 3A  
3 Chronic kidney disease stage 3B  
4 Chronic kidney disease stage 1 with proteinuria  
5 Chronic kidney disease stage 2 with proteinuria  
6 Chronic kidney disease stage 2 without proteinuria  
7 Chronic kidney disease stage 3 with proteinuria  
8 Chronic kidney disease stage 3 without proteinuria  
9 Chronic kidney disease stage 3A with proteinuria  
10 Chronic kidney disease stage 3A without proteinuria  
11 Chronic kidney disease stage 3B with proteinuria  
12 Chronic kidney disease stage 3B without proteinuria  
13 Chronic kidney disease stage 4 with proteinuria  
14 Chronic kidney disease stage 4 without proteinuria  
15 Chronic kidney disease stage 5 with proteinuria  
16 Chronic kidney disease stage 5 without proteinuria  
17 Cystic kidney disease  
18 Chronic kidney disease stage  
19 Chronic kidney disease stage 2  
20 Chronic kidney disease stage 3  
21 Chronic kidney disease stage 5  
22 Exception reporting - chronic kidney disease quality indicators  
23 Excepted from chronic kidney disease quality indicators - patient unsuitable  
24 Excepted from chronic kidney disease quality indicators - informed dissent  
25 Chronic kidney disease confirmed  
26 Chronic kidney disease diagnosis discussed with patient  
27 Reason for influenza vaccine - chronic kidney disease  
28 Chronic kidney disease follow-up  
29 Chronic kidney disease monthly review  
30 Chronic kidney disease 3 monthly review  
31 Chronic kidney disease 4 monthly review  
32 Chronic kidney disease six monthly review  
33 Chronic kidney disease self-management plan review  
34 Chronic kidney disease self-management plan agreed  
35 Polycystic kidney disease, infantile type  
36 Infantile polycystic kidney disease  
37 End stage kidney disease  
38 PKD - Polycystic kidney disease  
39 Familial juvenile medullary cystic kidney disease  
40 Adult type polycystic kidney disease type 1  
41 PKD1 - Polycystic kidney disease 1  
42 PKD2 - Polycystic kidney disease 2  
43 Autosomal dominant polycystic kidney disease in childhood  
44 History of kidney disease  
45 H/O chronic kidney disease  
46 Anaemia in chronic kidney disease  
47 Anemia in chronic kidney disease  
48 Chronic kidney disease stage 5 on dialysis  
49 Chronic kidney disease stage 5 with transplant  
50 Chronic kidney disease stage 5 due to type 2 diabetes mellitus  
51 Chronic kidney disease stage 4 due to type 2 diabetes mellitus  
52  
53  
54  
55  
56  
57  
58  
59  
60



1  
2 Chronic kidney disease stage 3 due to type 2 diabetes mellitus  
3 Chronic kidney disease stage 2 due to type 2 diabetes mellitus  
4 Chronic kidney disease stage 5 due to type 1 diabetes mellitus  
5 Hypertensive heart AND chronic kidney disease stage 4  
6 Hypertensive heart AND chronic kidney disease stage 3  
7 Hypertensive heart AND chronic kidney disease stage 2  
8 Chronic kidney disease stage 4 due to hypertension  
9 Chronic kidney disease stage 3 due to hypertension  
10 Chronic kidney disease stage 2 due to hypertension  
11 Hypertension in chronic kidney disease stage 3 due to type 2 diabetes mellitus  
12 Anaemia co-occurrent and due to chronic kidney disease stage 3  
13 Chronic kidney disease monitoring invitation  
14 Chronic kidney disease monitoring verbal invitation  
15 Chronic kidney disease monitoring telephone invitation  
16 Chronic kidney disease with glomerular filtration rate category G3a and albuminuria category A3  
17 Chronic kidney disease with glomerular filtration rate category G3b and albuminuria category A1  
18 Chronic kidney disease with glomerular filtration rate category G3b and albuminuria category A2  
19 ADPKD - autosomal dominant polycystic kidney disease  
20 Chronic kidney disease stage 5 due to drug induced diabetes mellitus  
21 Kidney disorder due to diabetes mellitus  
22 Kidney transplant failure and rejection  
23 Kidney failure unspecified  
24 Disorder related to renal transplantation  
25 Congenital cystic disease of kidney  
26 Cystic disease of kidney  
27 Disorder of kidney due to diabetes mellitus  
28 Failure of sterile precautions during kidney dialysis  
29 [X]Failure sterile precautions dur kidney dialys/other perf  
30 Mechanical failure of instrument or apparatus during kidney dialysis  
31  
32  
33  
34  
35  
36  
37  
38  
39  
40  
41  
42  
43  
44  
45  
46  
47  
48  
49  
50  
51  
52  
53  
54  
55  
56  
57  
58  
59  
60

1  
2  
3  
4  
5  
6  
7  
8  
9  
10  
11  
12  
13  
14  
15  
16  
17  
18  
19  
20  
21  
22  
23  
24  
25  
26  
27  
28  
29  
30  
31  
32  
33  
34  
35  
36  
37  
38  
39  
40  
41  
42  
43  
44  
45  
46  
47  
48  
49  
50  
51  
52  
53  
54  
55  
56  
57  
58  
59  
60

A1  
A2  
A3  
A1  
A2  
A3

For peer review only

1  
2  
3  
4  
5  
6  
7  
8  
9  
10  
11  
12  
13  
14  
15  
16  
17  
18  
19  
20  
21  
22  
23  
24  
25  
26  
27  
28  
29  
30  
31  
32  
33  
34  
35  
36  
37  
38  
39  
40  
41  
42  
43  
44  
45  
46  
47  
48  
49  
50  
51  
52  
53  
54  
55  
56  
57  
58  
59  
60

For peer review only

|    |             |                                     |
|----|-------------|-------------------------------------|
| 1  |             |                                     |
| 2  | ICD-10 code | Term                                |
| 3  | N18         | Chronic Kidney Disease              |
| 4  | N18.3       | Chronic kidney disease, stage 3     |
| 5  | N18.4       | Chronic kidney disease, stage 4     |
| 6  | N18.5       | Chronic kidney disease, stage 5     |
| 7  | N18.9       | Chronic kidney disease, unspecified |
| 8  | N19         | Unspecified Kidney Failure          |
| 9  |             |                                     |
| 10 |             |                                     |
| 11 |             |                                     |
| 12 |             |                                     |
| 13 |             |                                     |
| 14 |             |                                     |
| 15 |             |                                     |
| 16 |             |                                     |
| 17 |             |                                     |
| 18 |             |                                     |
| 19 |             |                                     |
| 20 |             |                                     |
| 21 |             |                                     |
| 22 |             |                                     |
| 23 |             |                                     |
| 24 |             |                                     |
| 25 |             |                                     |
| 26 |             |                                     |
| 27 |             |                                     |
| 28 |             |                                     |
| 29 |             |                                     |
| 30 |             |                                     |
| 31 |             |                                     |
| 32 |             |                                     |
| 33 |             |                                     |
| 34 |             |                                     |
| 35 |             |                                     |
| 36 |             |                                     |
| 37 |             |                                     |
| 38 |             |                                     |
| 39 |             |                                     |
| 40 |             |                                     |
| 41 |             |                                     |
| 42 |             |                                     |
| 43 |             |                                     |
| 44 |             |                                     |
| 45 |             |                                     |
| 46 |             |                                     |
| 47 |             |                                     |
| 48 |             |                                     |
| 49 |             |                                     |
| 50 |             |                                     |
| 51 |             |                                     |
| 52 |             |                                     |
| 53 |             |                                     |
| 54 |             |                                     |
| 55 |             |                                     |
| 56 |             |                                     |
| 57 |             |                                     |
| 58 |             |                                     |
| 59 |             |                                     |
| 60 |             |                                     |

For peer review only

| 1  | Medcodeid         | Term                                                                           |
|----|-------------------|--------------------------------------------------------------------------------|
| 2  | 24192017          | Oesophageal varices without bleeding                                           |
| 3  | 268812014         | Open operations on oesophageal varices                                         |
| 4  | 300779013         | Oesophageal varices without bleeding in diseases EC                            |
| 5  | 451442010         | Oesophageal varices in cirrhosis of the liver                                  |
| 6  | 862771000006116   | Oesophageal varices injected                                                   |
| 7  | 456800015         | Oesophageal varices NOS                                                        |
| 8  | 4656781000006112  | Fibreoptic oesophagoscopy and banding of oesophageal varices                   |
| 9  | 4657171000006111  | Rigid oesophagoscopy and banding of oesophageal varices                        |
| 10 | 2960631000006115  | OV - Oesophageal varices                                                       |
| 11 | 300784019         | Oesophageal varices in diseases EC NOS                                         |
| 12 | 990631000006117   | Oesophageal varices                                                            |
| 13 | 5076881000006115  | Sclerotherapy of oesophageal varices                                           |
| 14 | 3691711000006118  | Injection of sclerosing agent into oesophageal varices by endoscopy            |
| 15 | 5076631000006115  | Operation on oesophageal varices                                               |
| 16 | 5076901000006118  | Injection of scleroscant into oesophageal varices                              |
| 17 | 7329311000006114  | Endoscopy of upper gastrointestinal tract and injection of oesophageal varices |
| 18 | 7329331000006115  | Oesophagogastroduodenoscopy and injection of oesophageal varices               |
| 19 | 300993011         | [X]Oesophageal varices in diseases classified elsewhere                        |
| 20 | 4779721000006113  | Oesophageal varices with bleeding, associated with another disorder            |
| 21 | 4657131000006113  | Rigid oesophagoscopy and injection sclerotherapy of varices                    |
| 22 | 4656741000006118  | Fibreoptic oesophagoscopy and injection sclerotherapy of varices               |
| 23 | 2781041000006115  | Oesophageal varices with haemorrhage                                           |
| 24 | 453265010         | Oesophageal varices in alcoholic cirrhosis of the liver                        |
| 25 | 8284331000006113  | Fluoroscopy guided endoscopic banding of oesophageal varices                   |
| 26 | 268885015         | Fibreoptic endoscopic banding of oesophageal varices                           |
| 27 | 7329421000006112  | Oesophagogastroduodenoscopy and ligation of duodenal varices                   |
| 28 | 708811000006119   | Fibreoptic endoscopic injection sclerotherapy to oesophageal varices           |
| 29 | 3691701000006116  | Endoscopic injection of oesophageal varices                                    |
| 30 | 7516751000006110  | Transgastric plication of oesophageal varices                                  |
| 31 | 3691731000006112  | Injection of oesophageal varices by endoscopy                                  |
| 32 | 12726301000006115 | Oesophageal varices NOS                                                        |
| 33 | 4779691000006115  | Oesophageal varices associated with another disorder                           |
| 34 | 4779751000006116  | Oesophageal varices without bleeding, associated with another disorder         |
| 35 | 268819017         | Open injection sclerotherapy to oesophageal varices                            |
| 36 | 268957016         | Rigid oesophagoscopy and banding of oesophageal varices                        |
| 37 | 7329201000006115  | Endoscopy of upper gastrointestinal tract and banding of oesophageal varices   |
| 38 | 3691641000006113  | Oesophagoscopy for injection of oesophageal varices                            |
| 39 | 394102015         | Other specified open operation on oesophageal varices                          |
| 40 | 1216060010        | Oesophageal varices with bleeding                                              |
| 41 | 300775019         | Oesophageal varices in diseases EC                                             |
| 42 | 300776018         | Oesophageal varices with bleeding in diseases EC                               |
| 43 | 48003016          | Oesophageal varices                                                            |
| 44 | 7328901000006119  | Oesophagogastroduodenoscopy and injection of gastric varices                   |
| 45 | 7329381000006119  | Oesophagogastroduodenoscopy and banding of gastric varices                     |
| 46 | 7329221000006113  | Oesophagogastroduodenoscopy and banding of oesophageal varices                 |
| 47 | 2781061000006116  | BOV - Bleeding oesophageal varices                                             |
| 48 | 2781011000006119  | Bleeding oesophageal varices                                                   |
| 49 | 4657401000006111  | Balloon tamponade of oesophageal varices                                       |
| 50 | 268827014         | Open operation on oesophageal varices NOS                                      |

|    |                  |                                                                                        |
|----|------------------|----------------------------------------------------------------------------------------|
| 1  |                  |                                                                                        |
| 2  | 987751000006119  | Oesophageal varices injected                                                           |
| 3  | 737961000006116  | Ligation of oesophageal varices                                                        |
| 4  | 7813031000006112 | Downhill varices of oesophagus                                                         |
| 5  | 163571000006112  | Endoscopic injection sclerotherapy to varices of oesophagus using rigid oesophagoscopi |
| 6  | 8462251000006117 | Hepatic coma due to chronic hepatic failure                                            |
| 7  | 7024461000006115 | Hepatic coma due to chronic hepatitis B                                                |
| 8  | 8047801000006118 | Hepatic coma due to chronic hepatitis B with delta agent                               |
| 9  | 7024441000006119 | Chronic hepatitis B with hepatic coma                                                  |
| 10 | 7024451000006117 | Chronic viral hepatitis B with hepatic coma                                            |
| 11 | 4200821000006111 | Viral hepatitis B without hepatic coma                                                 |
| 12 | 286862019        | Hepatic coma due to viral hepatitis B                                                  |
| 13 | 2919481000006111 | Viral hepatitis B with hepatic coma                                                    |
| 14 | 120980011        | Hepatic coma                                                                           |
| 15 | 8032441000006115 | Hepatic coma due to hepatitis                                                          |
| 16 | 8467441000006116 | Hepatic coma due to subacute liver failure                                             |
| 17 | 68294019         | Viral hepatitis with hepatic coma                                                      |
| 18 | 179049010        | Viral hepatitis without hepatic coma                                                   |
| 19 | 8046451000006115 | Hepatic coma due to chronic hepatitis C                                                |
| 20 | 8458771000006112 | Hepatic coma due to alcoholic liver failure                                            |
| 21 | 286867013        | Other specified viral hepatitis with coma                                              |
| 22 | 286869011        | Other specified viral hepatitis with hepatic coma NOS                                  |
| 23 | 4412421000006113 | Hepatocellular carcinoma, sarcomatoid                                                  |
| 24 | 286868015        | Viral hepatitis C with coma                                                            |
| 25 | 286876018        | Unspecified viral hepatitis with coma                                                  |
| 26 | 288171017        | Hepatic coma due to viral hepatitis                                                    |
| 27 | 8467451000006119 | Coma due to subacute hepatic failure                                                   |
| 28 | 7376511000006111 | Hepatic encephalopathy in fulminant hepatic failure                                    |
| 29 | 2720841000006110 | Hepatocerebral encephalopathy                                                          |
| 30 | 221131000000118  | Hepatic encephalopathy                                                                 |
| 31 | 396394015        | Other sequelae of chronic liver disease                                                |
| 32 | 303466016        | Liver abscess and sequelae of chronic liver disease                                    |
| 33 | 303489012        | Liver abscess and chronic liver disease causing sequelae NOS                           |
| 34 | 57989014         | Portal hypertension                                                                    |
| 35 | 8019271000006110 | History of portal hypertension                                                         |
| 36 | 7705401000006112 | Portal hypertension caused by antiretroviral drug                                      |
| 37 | 7617291000006116 | Portal hypertension in classical cystic fibrosis                                       |
| 38 | 7837281000006116 | Idiopathic portal hypertension                                                         |
| 39 | 3059491000006115 | PHT - Portal hypertension                                                              |
| 40 | 5914631000006112 | Portal hypertensive gastropathy                                                        |
| 41 | 7617281000006119 | Portal hypertension due to cystic fibrosis                                             |
| 42 | 7705411000006110 | Portal hypertension caused by anti-retroviral drug                                     |
| 43 | 7304981000006110 | Pulmonary arterial hypertension associated with portal hypertension                    |
| 44 | 3510791000006110 | Familial arthrogryposis - cholestatic hepatorenal syndrome                             |
| 45 | 3510771000006114 | Familial arthrogryposis-cholestatic hepatorenal syndrome                               |
| 46 | 85441018         | Hepatorenal syndrome                                                                   |
| 47 | 4656791000006110 | Fiberoptic endoscopic banding of esophageal varices                                    |
| 48 | 2781081000006114 | BOV - Bleeding esophageal varices                                                      |
| 49 | 4656751000006116 | Fiberoptic endoscopic injection sclerotherapy to esophageal varices                    |
| 50 | 2781071000006111 | Esophageal varices with bleeding                                                       |
| 51 | 4779771000006114 | Esophageal varices without bleeding, associated with another disorder                  |
| 52 |                  |                                                                                        |
| 53 |                  |                                                                                        |
| 54 |                  |                                                                                        |
| 55 |                  |                                                                                        |
| 56 |                  |                                                                                        |
| 57 |                  |                                                                                        |
| 58 |                  |                                                                                        |
| 59 |                  |                                                                                        |
| 60 |                  |                                                                                        |

|    |                  |                                                                                      |
|----|------------------|--------------------------------------------------------------------------------------|
| 1  |                  |                                                                                      |
| 2  | 3595991000006116 | Ligation of esophageal varices                                                       |
| 3  | 4779741000006118 | Esophageal varices with bleeding, associated with another disorder                   |
| 4  | 4657191000006112 | Rigid esophagoscopy and banding of esophageal varices                                |
| 5  | 3691681000006119 | Injection of esophageal varices by endoscopy                                         |
| 6  | 5076891000006117 | Injection of sclerosant into esophageal varices                                      |
| 7  |                  |                                                                                      |
| 8  | 7329411000006116 | Esophagogastroduodenoscopy and ligation of duodenal varices                          |
| 9  | 5076641000006113 | Operation on esophageal varices                                                      |
| 10 | 3691651000006110 | Esophagoscopy for injection of esophageal varices                                    |
| 11 | 7329321000006118 | Esophagogastroduodenoscopy and injection of esophageal varices                       |
| 12 |                  |                                                                                      |
| 13 | 2781021000006110 | Bleeding esophageal varices                                                          |
| 14 | 5992721000006114 | Esophageal varices in alcoholic cirrhosis of the liver                               |
| 15 | 4656811000006114 | Fiberoptic esophagoscopy and banding of esophageal varices                           |
| 16 | 5076911000006115 | Sclerotherapy of esophageal varices                                                  |
| 17 | 4656461000006114 | Open operations on esophageal varices                                                |
| 18 | 7329231000006111 | Endoscopy of upper gastrointestinal tract and banding of esophageal varices          |
| 19 |                  |                                                                                      |
| 20 | 4657151000006118 | Rigid esophagoscopy and injection sclerotherapy of varices                           |
| 21 | 2725291000006114 | Esophageal varices without bleeding                                                  |
| 22 | 4779711000006117 | Esophageal varices associated with another disorder                                  |
| 23 | 7328891000006118 | Esophagogastroduodenoscopy and injection of gastric varices                          |
| 24 |                  |                                                                                      |
| 25 | 3691661000006112 | Injection of sclerosing agent into esophageal varices by endoscopy                   |
| 26 | 7516761000006112 | Transgastric plication of esophageal varices                                         |
| 27 | 4656511000006112 | Open injection sclerotherapy to esophageal varices                                   |
| 28 | 5975531000006117 | Esophageal varices in cirrhosis of the liver                                         |
| 29 | 4657391000006114 | Balloon tamponade of esophageal varices                                              |
| 30 |                  |                                                                                      |
| 31 | 2781031000006113 | Esophageal varices with hemorrhage                                                   |
| 32 | 2960621000006118 | Esophageal varices                                                                   |
| 33 | 7329301000006111 | Endoscopy of upper gastrointestinal tract and injection of esophageal varices        |
| 34 | 7329371000006117 | Esophagogastroduodenoscopy and banding of gastric varices                            |
| 35 | 3691671000006117 | Endoscopic injection of esophageal varices                                           |
| 36 |                  |                                                                                      |
| 37 | 4656761000006119 | Fiberoptic esophagoscopy and injection sclerotherapy of varices                      |
| 38 | 4657181000006114 | Rigid esophagoscopy and injection sclerotherapy of varices                           |
| 39 | 2960661000006112 | OV - Esophageal varices                                                              |
| 40 | 7329211000006117 | Esophagogastroduodenoscopy and banding of esophageal varices                         |
| 41 | 7813041000006119 | Downhill varices of esophagus                                                        |
| 42 | 4657161000006116 | Endoscopic injection sclerotherapy to varices of esophagus using rigid esophagoscope |
| 43 |                  |                                                                                      |
| 44 | 303452014        | Biliary cirrhosis of children                                                        |
| 45 | 2475562018       | Malignant neoplasm of interlobular biliary canals                                    |
| 46 | 303453016        | Biliary cirrhosis NOS                                                                |
| 47 | 3010811000006111 | Primary biliary cholangitis                                                          |
| 48 |                  |                                                                                      |
| 49 | 3106821000006112 | Clonorchiasis with biliary cirrhosis                                                 |
| 50 | 4170231000006119 | Obstructive biliary cirrhosis                                                        |
| 51 | 7731531000006110 | Primary biliary cirrhosis co-occurrent with systemic scleroderma                     |
| 52 | 4044018          | Biliary cirrhosis                                                                    |
| 53 | 21289010         | Secondary biliary cirrhosis                                                          |
| 54 |                  |                                                                                      |
| 55 | 52980015         | Primary biliary cirrhosis                                                            |
| 56 | 2526461000006113 | Chronic nonsuppurative destructive cholangitis                                       |
| 57 | 126721013        | Florid cirrhosis                                                                     |
| 58 | 303425016        | Capsular portal cirrhosis                                                            |
| 59 | 396392016        | Juvenile portal cirrhosis                                                            |
| 60 | 451442010        | Oesophageal varices in cirrhosis of the liver                                        |

|    |                  |                                                                      |
|----|------------------|----------------------------------------------------------------------|
| 1  |                  |                                                                      |
| 2  | 493707012        | Hypertrophic portal cirrhosis                                        |
| 3  | 2576980018       | Portal cirrhosis                                                     |
| 4  | 1736361000000112 | Cystic fibrosis related cirrhosis                                    |
| 5  | 123999018        | Congestive cirrhosis                                                 |
| 6  | 396393014        | Non-alcoholic cirrhosis NOS                                          |
| 7  | 55851000006118   | Xanthomatous portal cirrhosis                                        |
| 8  | 2598551000006118 | ICC - Indian childhood cirrhosis                                     |
| 9  | 8242561000006112 | Cirrhosis associated with cystic fibrosis                            |
| 10 | 3713571000006114 | Congestive cirrhosis                                                 |
| 11 | 5524681000006114 | Cirrhosis secondary to cholestasis                                   |
| 12 | 6941931000006112 | Laennec's cirrhosis                                                  |
| 13 | 5493051000006111 | Cirrhosis of liver not due to alcohol                                |
| 14 | 4353661000006114 | Cholangiolitic cirrhosis                                             |
| 15 | 7875311000006114 | Cirrhosis of liver caused by methyl dopa                             |
| 16 | 7518231000006111 | NAIC - North American Indian childhood cirrhosis                     |
| 17 | 7738891000006115 | Idiopathic copper associated cirrhosis of liver                      |
| 18 | 2754821000006111 | Syphilitic cirrhosis                                                 |
| 19 | 7559281000006114 | HMDPC - hypermanganesemia with dystonia, polycythaemia and cirrhosis |
| 20 | 2847631000006117 | Micronodular cirrhosis                                               |
| 21 | 3515305014       | Cirrhosis of liver with primary sclerosing cholangitis               |
| 22 | 3905811000006110 | Postnecrotic cirrhosis                                               |
| 23 | 7868601000006115 | Cardiomyopathy co-occurrent and due to cirrhosis of liver            |
| 24 | 7875301000006111 | Cirrhosis of liver caused by amiodarone                              |
| 25 | 7966981000006110 | Cirrhosis of liver due to chronic hepatitis C                        |
| 26 | 8032261000006117 | Cirrhosis of liver due to hepatitis B                                |
| 27 | 6349661000006117 | Early cirrhosis                                                      |
| 28 | 7043971000006117 | Drug-induced cirrhosis of liver                                      |
| 29 | 7559271000006111 | HMDPC - hypermanganesemia with dystonia, polycythemia and cirrhosis  |
| 30 | 7875291000006110 | Cirrhosis of liver caused by methotrexate                            |
| 31 | 3772081000006115 | Pigment cirrhosis                                                    |
| 32 | 7043981000006119 | Drug-induced hepatic cirrhosis                                       |
| 33 | 6617771000006112 | Bronze cirrhosis                                                     |
| 34 | 5992721000006114 | Esophageal varices in alcoholic cirrhosis of the liver               |
| 35 | 3010831000006117 | Hanot's cirrhosis                                                    |
| 36 | 3713561000006119 | Cardiac cirrhosis                                                    |
| 37 | 476611000006116  | Alcoholic cirrhosis of liver                                         |
| 38 | 2579818016       | Laennec's cirrhosis                                                  |
| 39 | 303438012        | Cardituberculous cirrhosis                                           |
| 40 | 303781011        | [X]Other and unspecified cirrhosis of liver                          |
| 41 | 906081000006114  | [RFC] Cirrhosis                                                      |
| 42 | 353621011        | Laennec's cirrhosis, non-alcoholic                                   |
| 43 | 453265010        | Oesophageal varices in alcoholic cirrhosis of the liver              |
| 44 | 303393017        | Cirrhosis and chronic liver disease                                  |
| 45 | 303414013        | Unilobular portal cirrhosis                                          |
| 46 | 11267010         | Indian childhood cirrhosis                                           |
| 47 | 7743871000006114 | Decompensated cirrhosis of liver                                     |
| 48 | 4355091000006112 | Latent cirrhosis                                                     |
| 49 | 4353651000006112 | Nutritional cirrhosis                                                |
| 50 | 2598561000006116 | Cirrhosis-familial with pulmonary hypertension                       |
| 51 | 2816681000006110 | CL - Cirrhosis of liver                                              |



|    |                  |                                                                           |
|----|------------------|---------------------------------------------------------------------------|
| 1  |                  |                                                                           |
| 2  | 6947471000006110 | Alcoholic liver cirrhosis                                                 |
| 3  | 3206871000006111 | Macronodular cirrhosis                                                    |
| 4  | 226161000006113  | Pipe-stem portal cirrhosis                                                |
| 5  | 303442010        | Portal cirrhosis unspecified                                              |
| 6  | 303439016        | Syphilitic portal cirrhosis                                               |
| 7  | 303518014        | Toxic liver disease with fibrosis and cirrhosis of liver                  |
| 8  | 396390012        | Multilobular portal cirrhosis                                             |
| 9  |                  |                                                                           |
| 10 | 7743881000006112 | Decompensated cirrhosis                                                   |
| 11 | 5087011000006114 | Hypoxia-associated cirrhosis                                              |
| 12 |                  |                                                                           |
| 13 | 603321000006118  | Cryptogenic cirrhosis                                                     |
| 14 | 2935051000006118 | Posthepatic cirrhosis                                                     |
| 15 | 2507081000006119 | Glissonian cirrhosis                                                      |
| 16 | 6883751000006115 | Vandellia cirrhosa                                                        |
| 17 | 3206891000006112 | PNC - Postnecrotic cirrhosis                                              |
| 18 |                  |                                                                           |
| 19 | 2816671000006112 | Hepatic cirrhosis                                                         |
| 20 | 5086991000006115 | Laennec cirrhosis, non-alcoholic                                          |
| 21 | 4787221000006115 | Pipestem portal cirrhosis                                                 |
| 22 | 4787261000006114 | Zooparasitic portal cirrhosis                                             |
| 23 |                  |                                                                           |
| 24 | 550431000006116  | Childhood function cirrhosis                                              |
| 25 | 731231000006114  | Macronodular cirrhosis of liver                                           |
| 26 | 803961000006119  | Glycogenosis with hepatic cirrhosis                                       |
| 27 | 1786709019       | Pigmentary cirrhosis of liver                                             |
| 28 | 303419015        | Diffuse nodular cirrhosis                                                 |
| 29 | 303420014        | Fatty portal cirrhosis                                                    |
| 30 |                  |                                                                           |
| 31 | 303433015        | Pigmentary portal cirrhosis                                               |
| 32 | 303458013        | Portal fibrosis without cirrhosis                                         |
| 33 | 7518221000006113 | North American Indian childhood cirrhosis                                 |
| 34 | 5152271000006110 | Clay pipe-stem cirrhosis                                                  |
| 35 | 221111000000114  | Cirrhosis - non-alcoholic                                                 |
| 36 |                  |                                                                           |
| 37 | 353613017        | Cirrhosis of liver                                                        |
| 38 | 7559261000006116 | Hypermanganesemia with dystonia, polycythemia, and cirrhosis              |
| 39 | 6941941000006119 | PC - Portal cirrhosis                                                     |
| 40 | 2824431000006111 | Progressive neuronal degeneration with liver cirrhosis                    |
| 41 | 3206901000006111 | Multilobar cirrhosis                                                      |
| 42 |                  |                                                                           |
| 43 | 6947461000006115 | Alcoholic cirrhosis                                                       |
| 44 | 2526441000006114 | Cholangitic cirrhosis                                                     |
| 45 | 5975531000006117 | Esophageal varices in cirrhosis of the liver                              |
| 46 | 2753761000006112 | Mixed micro AND macronodular cirrhosis                                    |
| 47 | 6617781000006110 | Bronzed cirrhosis                                                         |
| 48 |                  |                                                                           |
| 49 | 211821000006111  | Postnecrotic cirrhosis of liver                                           |
| 50 | 477604016        | Mixed portal cirrhosis                                                    |
| 51 | 303435010        | Toxic portal cirrhosis                                                    |
| 52 | 3033421000006115 | Parasitic cirrhosis                                                       |
| 53 | 8458711000006115 | Ascites due to alcoholic cirrhosis                                        |
| 54 |                  |                                                                           |
| 55 | 4353641000006110 | Toxic cirrhosis                                                           |
| 56 | 4403611000006113 | Acquired portal-systemic shunt due to cirrhosis                           |
| 57 | 3515307018       | Cirrhosis of liver co-occurrent and due to primary sclerosing cholangitis |
| 58 | 4355101000006118 | Advanced cirrhosis                                                        |
| 59 | 2526451000006111 | Cholestatic cirrhosis                                                     |
| 60 | 5493041000006114 | Cirrhosis, nonalcoholic                                                   |

|    |                   |                                                                                       |
|----|-------------------|---------------------------------------------------------------------------------------|
| 1  |                   |                                                                                       |
| 2  | 1763641000006113  | Cirrhosis of liver due to cystic fibrosis                                             |
| 3  | 303437019         | Bacterial portal cirrhosis                                                            |
| 4  | 303440019         | Zooparasitic portal cirrhosis                                                         |
| 5  | 7559251000006118  | Hypermanganesemia with dystonia, polycythaemia, and cirrhosis                         |
| 6  | 303441015         | Infectious cirrhosis                                                                  |
| 7  |                   |                                                                                       |
| 8  | 4787861000006113  | PSC - Primary sclerosing cholangitis                                                  |
| 9  | 7837331000006113  | Immunoglobulin G4-related sclerosing cholangitis                                      |
| 10 | 5650961000006110  | Human immunodeficiency virus HIV-related sclerosing cholangitis                       |
| 11 | 303617014         | Sclerosing cholangitis                                                                |
| 12 | 5650951000006113  | HIV-related sclerosing cholangitis                                                    |
| 13 |                   |                                                                                       |
| 14 | 7837321000006110  | IgG4-related sclerosing cholangitis                                                   |
| 15 | 5650971000006115  | Human immunodeficiency virus-related sclerosing cholangitis                           |
| 16 | 303614019         | Primary sclerosing cholangitis                                                        |
| 17 | 303616017         | Secondary sclerosing cholangitis                                                      |
| 18 |                   |                                                                                       |
| 19 | 2656731000006119  | Chronic lymphocytic cholangitis-cholangiohepatitis                                    |
| 20 | 119489014         | Chronic cholangitis                                                                   |
| 21 | 8462001000006110  | Chronic cholangitis due to bile duct calculus                                         |
| 22 | 8462031000006119  | Chronic cholangitis due to bile duct calculus with obstruction                        |
| 23 |                   |                                                                                       |
| 24 | 95368015          | Chronic lobular hepatitis                                                             |
| 25 | 127487019         | Chronic hepatitis                                                                     |
| 26 | 303404016         | Autoimmune chronic active hepatitis                                                   |
| 27 | 683211000000113   | Chronic hepatitis annual review                                                       |
| 28 | 303409014         | Chronic hepatitis unspecified                                                         |
| 29 | 303410016         | Chronic hepatitis NOS                                                                 |
| 30 |                   |                                                                                       |
| 31 | 553311000006111   | Chronic aggressive hepatitis                                                          |
| 32 | 557081000006110   | Chronic viral hepatitis, unspecified                                                  |
| 33 | 3748781000006119  | CH - Chronic hepatitis                                                                |
| 34 | 3507191000006112  | Chronic type B viral hepatitis                                                        |
| 35 | 4787151000006116  | CAH - Chronic aggressive hepatitis                                                    |
| 36 |                   |                                                                                       |
| 37 | 8040621000006113  | Cryoglobulinaemia due to chronic hepatitis C                                          |
| 38 | 8040631000006111  | Cryoglobulinemia due to chronic hepatitis C                                           |
| 39 | 12066941000006110 | Chronic hepatitis C caused by Hepatitis C virus genotype 1                            |
| 40 | 5086951000006114  | Drug-induced chronic hepatitis                                                        |
| 41 | 12066921000006115 | Chronic hepatitis C caused by Hepatitis C virus genotype 2                            |
| 42 |                   |                                                                                       |
| 43 | 8462251000006117  | Hepatic coma due to chronic hepatic failure                                           |
| 44 | 8467501000006117  | Hepatic ascites co-occurrent with chronic active hepatitis due to toxic liver disease |
| 45 | 7966991000006113  | Chronic hepatitis C with stage 4 fibrosis                                             |
| 46 | 3122251000006114  | Chronic immune tolerant hepatitis B                                                   |
| 47 | 7024461000006115  | Hepatic coma due to chronic hepatitis B                                               |
| 48 |                   |                                                                                       |
| 49 | 8047801000006118  | Hepatic coma due to chronic hepatitis B with delta agent                              |
| 50 | 7024441000006119  | Chronic hepatitis B with hepatic coma                                                 |
| 51 | 3312561000006112  | Chronic active type B viral hepatitis                                                 |
| 52 | 7384531000006118  | Chronic hepatitis E                                                                   |
| 53 | 8112141000006113  | Chronic hepatitis C with stage 3 fibrosis                                             |
| 54 |                   |                                                                                       |
| 55 | 7024451000006117  | Chronic viral hepatitis B with hepatic coma                                           |
| 56 | 12066931000006117 | Chronic hepatitis C caused by Hepatitis C virus genotype 4                            |
| 57 | 7629961000006118  | Chronic active hepatitis C                                                            |
| 58 | 8462171000006115  | Hepatic ascites due to chronic alcoholic hepatitis                                    |
| 59 | 7583121000006113  | Chronic hepatitis C with stage 2 fibrosis                                             |
| 60 | 3959541000006116  | Chronic aggressive viral hepatitis                                                    |

|    |                   |                                                                        |
|----|-------------------|------------------------------------------------------------------------|
| 1  |                   |                                                                        |
| 2  | 5086841000006119  | Chronic hepatic failure                                                |
| 3  | 4407011000006114  | Chronic type C viral hepatitis                                         |
| 4  | 303401012         | Chronic active hepatitis                                               |
| 5  | 303515012         | Toxic liver disease with chronic persistent hepatitis                  |
| 6  | 69895016          | Chronic persistent hepatitis                                           |
| 7  | 1232261014        | Chronic viral hepatitis B                                              |
| 8  | 5086671000006111  | Chronic non-A non-B hepatitis                                          |
| 9  | 12070031000006113 | Chronic hepatitis C caused by Hepatitis C virus genotype 1b            |
| 10 | 12061231000006118 | Chronic hepatitis C caused by hepatitis C virus genotype 5             |
| 11 | 3475171000006115  | Chronic persistent viral hepatitis                                     |
| 12 | 3587281000006119  | Chronic active viral hepatitis                                         |
| 13 | 2516171000006116  | Chronic aggressive type B viral hepatitis                              |
| 14 | 3514567013        | Chronic viral hepatitis D                                              |
| 15 | 4787131000006111  | CAH - Chronic active hepatitis                                         |
| 16 | 3175071000006117  | CPH - Chronic persistent hepatitis                                     |
| 17 | 303516013         | Toxic liver disease with chronic lobular hepatitis                     |
| 18 | 3122241000006112  | Chronic persistent type B viral hepatitis                              |
| 19 | 288169017         | [X]Other chronic viral hepatitis                                       |
| 20 | 288170016         | [X]Chronic viral hepatitis, unspecified                                |
| 21 | 451124014         | Chronic alcoholic hepatitis                                            |
| 22 | 286879013         | Chronic viral hepatitis B without delta-agent                          |
| 23 | 353580016         | Chronic viral hepatitis B with delta-agent                             |
| 24 | 3514568015        | Chronic infection caused by Hepatitis D virus                          |
| 25 | 12070041000006115 | Chronic hepatitis C caused by Hepatitis C virus genotype 1a            |
| 26 | 12061221000006116 | Chronic hepatitis C caused by hepatitis C virus genotype 6             |
| 27 | 8046451000006115  | Hepatic coma due to chronic hepatitis C                                |
| 28 | 3431801000006116  | CLH - Chronic lobular hepatitis                                        |
| 29 | 17930015          | Chronic viral hepatitis                                                |
| 30 | 5006091000006115  | Chronic hepatocerebral degeneration                                    |
| 31 | 12064771000006114 | Chronic hepatitis C caused by Hepatitis C virus genotype 3             |
| 32 | 7712041000006110  | Occult chronic type B viral hepatitis                                  |
| 33 | 1680591000006117  | Chronic hepatitis annual review - enhanced services admin              |
| 34 | 5086651000006118  | Chronic viral hepatitis B with hepatitis D                             |
| 35 | 303517016         | Toxic liver disease with chronic active hepatitis                      |
| 36 | 557071000006112   | Chronic hepatitis C                                                    |
| 37 | 2146521000000117  | Hepatitis C genotype 4                                                 |
| 38 | 7488601000006110  | Hepatitis C virus genotype 4                                           |
| 39 | 7488591000006119  | Hepatitis C virus genotype 3                                           |
| 40 | 2146501000000114  | Hepatitis C genotype 3                                                 |
| 41 | 3694691000006119  | Hepatogenous chronic copper poisoning                                  |
| 42 | 303389011         | Subacute yellow atrophy                                                |
| 43 | 4786991000006110  | Acute yellow atrophy of liver                                          |
| 44 | 3151011000006114  | Spontaneous abortion with acute yellow atrophy of liver                |
| 45 | 2560711000006114  | Failed attempted abortion with acute yellow atrophy of liver           |
| 46 | 2591941000006117  | Legal abortion with acute yellow atrophy of liver                      |
| 47 | 3975431000006114  | Illegal abortion with acute yellow atrophy of liver                    |
| 48 | 4787101000006115  | Subacute yellow atrophy of liver                                       |
| 49 | 3100831000006113  | Acute yellow atrophy of liver following molar AND/OR ectopic pregnancy |
| 50 | 2619492010        | Acute yellow atrophy                                                   |
| 51 | 3151031000006115  | Miscarriage with acute yellow atrophy of liver                         |
| 52 |                   |                                                                        |
| 53 |                   |                                                                        |
| 54 |                   |                                                                        |
| 55 |                   |                                                                        |
| 56 |                   |                                                                        |
| 57 |                   |                                                                        |
| 58 |                   |                                                                        |
| 59 |                   |                                                                        |
| 60 |                   |                                                                        |

|    |                   |                                                                                       |
|----|-------------------|---------------------------------------------------------------------------------------|
| 1  |                   |                                                                                       |
| 2  | 3636591000006115  | Acute yellow atrophy of liver during pregnancy                                        |
| 3  | 7840451000006111  | Idiopathic granulomatous hepatitis                                                    |
| 4  | 303787010         | [X]Granulomatous hepatitis, not elsewhere classified                                  |
| 5  | 806841000006117   | Granulomatous hepatitis                                                               |
| 6  | 293605014         | Alpha-1-antitrypsin hepatitis                                                         |
| 7  | 287866013         | Hepatitis in toxoplasmosis                                                            |
| 8  | 2780581000006113  | Hepatitis caused by acquired toxoplasmosis                                            |
| 9  | 2780571000006110  | Hepatitis due to acquired toxoplasmosis                                               |
| 10 | 287865012         | Toxoplasma hepatitis                                                                  |
| 11 | 353587018         | Alcoholic hepatitis                                                                   |
| 12 | 353595019         | Alcoholic hepatic failure                                                             |
| 13 | 7266931000006113  | NASH - Nonalcoholic steatohepatitis                                                   |
| 14 | 8458751000006119  | Ascites due to alcoholic hepatitis                                                    |
| 15 | 12031691000006112 | Alcoholic steatohepatitis                                                             |
| 16 | 2819666013        | Nonalcoholic steatohepatitis                                                          |
| 17 | 5086741000006114  | AH - Alcoholic hepatitis                                                              |
| 18 | 303388015         | Subacute hepatic failure                                                              |
| 19 | 3678071000006110  | Subacute noninfective hepatitis                                                       |
| 20 | 8467451000006119  | Coma due to subacute hepatic failure                                                  |
| 21 | 122921000006118   | Subacute hepatitis - noninfective                                                     |
| 22 | 4787061000006118  | Subacute hepatic necrosis                                                             |
| 23 | 7837261000006114  | Subacute hepatic failure caused by hepatitis virus                                    |
| 24 | 3678081000006113  | Subacute non-infective hepatitis                                                      |
| 25 | 353567019         | Nonspecific reactive hepatitis                                                        |
| 26 | 303456012         | Chronic nonalcoholic liver disease                                                    |
| 27 | 2159899016        | Autoimmune hepatitis                                                                  |
| 28 | 7821651000006119  | Autoimmune hepatitis type 1                                                           |
| 29 | 7821671000006112  | Autoimmune hepatitis type 3                                                           |
| 30 | 7821661000006117  | Autoimmune hepatitis type 2                                                           |
| 31 | 303507014         | Toxic hepatitis                                                                       |
| 32 | 1488891017        | Hepatitis C viral load                                                                |
| 33 | 2118321000000118  | Hepatitis C antigen positive                                                          |
| 34 | 8234961000006111  | Hepatitis C viral RNA PCR (ribonucleic acid polymerase chain reaction) positive       |
| 35 | 7488571000006115  | Hepatitis C virus genotype 1                                                          |
| 36 | 7488531000006118  | Hepatitis C virus subtype 3b                                                          |
| 37 | 7819901000006118  | Hepatitis caused by sexually transmissible virus                                      |
| 38 | 7488511000006112  | Hepatitis C virus subtype 2b                                                          |
| 39 | 6590751000006113  | Hepatitis C virus genotype determination                                              |
| 40 | 3523221000006115  | Hepatitis C virus                                                                     |
| 41 | 4332061000006113  | Hepatitis C virus ribosomal ribonucleic acid                                          |
| 42 | 6349691000006113  | Polymerase chain reaction positive for hepatitis C viral ribonucleic acid genotype 1A |
| 43 | 7488541000006111  | Hepatitis C virus subtype 5a                                                          |
| 44 | 8332921000006116  | Hepatitis C targeted genetic test                                                     |
| 45 | 7488521000006116  | Hepatitis C virus subtype 3a                                                          |
| 46 | 6280591000006117  | Finding of Hepatitis C status                                                         |
| 47 | 12618221000006116 | Hepatitis C screening - infected with hepatitis C virus                               |
| 48 | 7488501000006114  | Hepatitis C virus subtype 2a                                                          |
| 49 | 4332051000006111  | Hepatitis C virus rRNA                                                                |
| 50 | 4332421000006110  | Hepatitis C virus RNA                                                                 |
| 51 | 7488641000006112  | Hepatitis C virus subtype 2c                                                          |
| 52 |                   |                                                                                       |
| 53 |                   |                                                                                       |
| 54 |                   |                                                                                       |
| 55 |                   |                                                                                       |
| 56 |                   |                                                                                       |
| 57 |                   |                                                                                       |
| 58 |                   |                                                                                       |
| 59 |                   |                                                                                       |
| 60 |                   |                                                                                       |

|    |                   |                                                                                           |
|----|-------------------|-------------------------------------------------------------------------------------------|
| 1  |                   |                                                                                           |
| 2  | 185065013         | Hepatitis C virus RNA (ribonucleic acid) assay                                            |
| 3  | 286871011         | Viral hepatitis C                                                                         |
| 4  | 8368021000006111  | Hepatitis C cryoglobulinaemic vasculitis                                                  |
| 5  | 7488561000006110  | Hepatitis C virus subtype 4a                                                              |
| 6  | 1739601000000111  | Hepatitis C PCR positive                                                                  |
| 7  |                   |                                                                                           |
| 8  | 7686921000006114  | Polymerase chain reaction test for Hepatitis C positive                                   |
| 9  | 1766481000006112  | Hepatitis C viral ribonucleic acid polymerase chain reaction positive                     |
| 10 | 7488621000006117  | Hepatitis C virus genotype 6                                                              |
| 11 | 7488481000006116  | Hepatitis C virus subtype 1a                                                              |
| 12 |                   |                                                                                           |
| 13 | 7488551000006113  | Hepatitis C virus subtype 6a                                                              |
| 14 | 6347341000006116  | Hepatitis C antibody positive with elevated alanine transaminase                          |
| 15 | 7488651000006114  | Hepatitis C virus subtype 4b                                                              |
| 16 | 7488681000006118  | Hepatitis C virus subtype 4e                                                              |
| 17 | 5189141000006113  | Genus: Hepatitis C virus group                                                            |
| 18 | 683911000000119   | Hepatitis C screening positive                                                            |
| 19 |                   |                                                                                           |
| 20 | 7488671000006116  | Hepatitis C virus subtype 4d                                                              |
| 21 | 6552441000006110  | Hepatitis C viral load                                                                    |
| 22 | 4743991000006113  | Hepatitis C virus measurement                                                             |
| 23 | 8368011000006115  | Hepatitis C virus-associated cryoglobulinaemic vasculitis                                 |
| 24 |                   |                                                                                           |
| 25 | 7488491000006118  | Hepatitis C virus subtype 1b                                                              |
| 26 | 7568861000006119  | Reactivation of hepatitis C viral hepatitis                                               |
| 27 | 5619351000006114  | Congenital hepatitis C infection                                                          |
| 28 | 2146441000000113  | Hepatitis C genotype 1                                                                    |
| 29 | 1761251000006111  | [SHHAPT] Viral hepatitis C - first diagnosis                                              |
| 30 |                   |                                                                                           |
| 31 | 7488631000006119  | Hepatitis C virus subtype 1c                                                              |
| 32 | 6590761000006110  | Hepatitis C virus genotype                                                                |
| 33 | 7488581000006117  | Hepatitis C virus genotype 2                                                              |
| 34 | 8037721000006115  | Glomerulonephritis due to hepatitis C                                                     |
| 35 |                   |                                                                                           |
| 36 | 7263471000006113  | Hepatitis B and hepatitis C                                                               |
| 37 | 12031701000006112 | Steatohepatitis caused by ingestible alcohol                                              |
| 38 | 6349671000006112  | PCR positive for hepatitis C viral RNA (genotype 1A)                                      |
| 39 | 1786403019        | Hepatitis C nucleic acid detection                                                        |
| 40 | 286868015         | Viral hepatitis C with coma                                                               |
| 41 | 6349681000006110  | Polymerase chain reaction (PCR) positive for hepatitis C viral ribonucleic acid (genotype |
| 42 |                   |                                                                                           |
| 43 | 4332431000006113  | Hepatitis C virus ribonucleic acid                                                        |
| 44 | 7488611000006113  | Hepatitis C virus genotype 5                                                              |
| 45 | 6347331000006114  | Hepatitis C seropositive with elevated ALT                                                |
| 46 | 8266261000006115  | Hepatitis C virus genotype determination by ribonucleic acid analysis                     |
| 47 | 6347321000006111  | Hepatitis C antibody positive with elevated ALT                                           |
| 48 |                   |                                                                                           |
| 49 | 2146461000000114  | Hepatitis C genotype 2                                                                    |
| 50 | 2146541000000112  | Hepatitis C genotype 5                                                                    |
| 51 | 2146561000000113  | Hepatitis C genotype 6                                                                    |
| 52 | 1676391000006116  | Hepatitis C PCR positive                                                                  |
| 53 | 994021000006115   | Hepatitis C positive                                                                      |
| 54 |                   |                                                                                           |
| 55 | 1783609017        | Hepatitis C virus genotype                                                                |
| 56 | 84516016          | Hepatitis C                                                                               |
| 57 | 3523231000006117  | HCV - Hepatitis C virus                                                                   |
| 58 | 7488661000006111  | Hepatitis C virus subtype 4c                                                              |
| 59 | 287970018         | Sequelae of viral hepatitis                                                               |
| 60 | 426451000006118   | [X]Sequelae of viral hepatitis                                                            |

|    |                  |                                                              |
|----|------------------|--------------------------------------------------------------|
| 1  |                  |                                                              |
| 2  | 1850901000006115 | Reason for influenza vaccine - chronic liver disease         |
| 3  | 303489012        | Liver abscess and chronic liver disease causing sequelae NOS |
| 4  | 7300021000006118 | Sequela of chronic liver disease                             |
| 5  | 7700651000006119 | Chronic alcoholic liver disease                              |
| 6  | 7703061000006115 | Acute on chronic alcoholic liver disease                     |
| 7  |                  |                                                              |
| 8  | 303465017        | Chronic liver disease                                        |
| 9  | 396394015        | Other sequelae of chronic liver disease                      |
| 10 | 303464018        | Other non-alcoholic chronic liver disease NOS                |
| 11 | 303466016        | Liver abscess and sequelae of chronic liver disease          |
| 12 |                  |                                                              |
| 13 | b18              | chronic viral hepatitis                                      |
| 14 | b18.0            | chronic viral hepatitis b with delta-agent                   |
| 15 | b18.1            | chronic viral hepatitis b without delta-agent                |
| 16 | b18.2            | chronic viral hepatitis c                                    |
| 17 | b18.8            | other chronic viral hepatitis                                |
| 18 | b18.9            | chronic viral hepatitis, unspecified                         |
| 19 |                  |                                                              |
| 20 | k70              | alcoholic liver disease                                      |
| 21 | k70.1            | alcoholic hepatitis                                          |
| 22 | k70.2            | alcoholic fibrosis and sclerosis of liver                    |
| 23 | k70.3            | alcoholic cirrhosis of liver                                 |
| 24 |                  |                                                              |
| 25 | k70.9            | alcoholic hepatic failure                                    |
| 26 | k70.9            | alcoholic liver disease, unspecified                         |
| 27 | k71              | toxic liver disease                                          |
| 28 | k71.0            | toxic liver disease with cholestasis                         |
| 29 | k71.3            | toxic liver disease with chronic persistent hepatitis        |
| 30 | k71.4            | toxic liver disease with chronic lobular hepatitis           |
| 31 | k71.5            | toxic liver disease with chronic active hepatitis            |
| 32 | k71.6            | toxic liver disease with hepatitis, not elsewhere classified |
| 33 | k71.7            | toxic liver disease with fibrosis and cirrhosis of liver     |
| 34 |                  |                                                              |
| 35 | k72.1            | chronic hepatic failure                                      |
| 36 | k72.9            | hepatic failure, unspecified                                 |
| 37 |                  |                                                              |
| 38 | k73              | chronic hepatitis, not elsewhere classified                  |
| 39 | k73.0            | chronic lobular hepatitis, not elsewhere classified          |
| 40 | k73.1            | chronic active hepatitis, not elsewhere classified           |
| 41 | k73.2            | chronic active hepatitis, not elsewhere classified           |
| 42 |                  |                                                              |
| 43 | k73.8            | other chronic hepatitis, not elsewhere classified"           |
| 44 | k73.9            | chronic hepatitis, unspecified                               |
| 45 | k74.0            | hepatic fibrosis                                             |
| 46 | k74.1            | hepatic sclerosis                                            |
| 47 | k74.2            | hepatic fibrosis with hepatic sclerosis                      |
| 48 |                  |                                                              |
| 49 | k74.3            | primary biliary cirrhosis                                    |
| 50 | k74.4            | secondary biliary cirrhosis                                  |
| 51 | k74.5            | biliary cirrhosis, unspecified                               |
| 52 | k74.6            | other and unspecified cirrhosis of liver                     |
| 53 | k75              | other inflammatory liver diseases                            |
| 54 | k75.3            | granulomatous hepatitis, not elsewhere classified            |
| 55 | k75.4            | autoimmune hepatitis                                         |
| 56 | k75.9            | inflammatory liver disease, unspecified                      |
| 57 |                  |                                                              |
| 58 | k76              | other diseases of liver                                      |
| 59 | k76.1            | chronic passive congestion of liver                          |
| 60 | k76.3            | infarction of liver                                          |



|    |                   |                                                                           |
|----|-------------------|---------------------------------------------------------------------------|
| 1  |                   |                                                                           |
| 2  | k76.4             | peliosis hepatitis                                                        |
| 3  | k76.5             | hepatic veno-occlusive disease                                            |
| 4  | k76.6             | portal hypertension                                                       |
| 5  | k76.7             | hepatorenal syndrome                                                      |
| 6  | k76.8             | other specified diseases of liver                                         |
| 7  | k76.9             | liver disease, unspecified                                                |
| 8  |                   |                                                                           |
| 9  | 270232016         | Replacement of previous liver transplant                                  |
| 10 | 31211000006119    | Orthotopic transplantation of liver                                       |
| 11 | 225661000006111   | Piggy back liver transplant                                               |
| 12 | 3527364013        | Transplanted liver present                                                |
| 13 | 3532180010        | Liver transplant recipient                                                |
| 14 |                   |                                                                           |
| 15 | 12458801000006116 | [V]Liver transplanted                                                     |
| 16 | 2786021000006116  | LTx - Liver transplant                                                    |
| 17 | 2786001000006114  | Tx - Liver transplantation                                                |
| 18 |                   |                                                                           |
| 19 | 4661791000006112  | Piggy-back liver transplant                                               |
| 20 | 2560511000006119  | Structure of transplanted liver                                           |
| 21 | 8030371000006119  | Aftercare for liver transplant done                                       |
| 22 | 5161091000006119  | Ultrasound scan of transplant liver                                       |
| 23 | 5087211000006119  | Liver transplant rejection                                                |
| 24 |                   |                                                                           |
| 25 | 7566431000006113  | Liver transplant recipient                                                |
| 26 | 7170221000006110  | Chronic rejection of liver transplant                                     |
| 27 | 3033691000006115  | Complication of transplanted liver                                        |
| 28 | 2949531000006115  | Liver transplant without recipient hepatectomy                            |
| 29 | 8325471000006118  | Fluoroscopic angiography of transplanted liver                            |
| 30 | 5087221000006110  | Liver transplant failure                                                  |
| 31 |                   |                                                                           |
| 32 | 8293001000006116  | Living donor liver transplantation                                        |
| 33 | 8325851000006114  | CT of transplanted liver                                                  |
| 34 | 8325771000006113  | Ultrasound guided biopsy of transplanted liver                            |
| 35 | 8450901000006118  | Pretransplant evaluation of liver recipient                               |
| 36 | 3973131000006117  | Anesthesia for liver transplant                                           |
| 37 |                   |                                                                           |
| 38 | 8325881000006118  | Fluoroscopy guided percutaneous transjugular biopsy of transplanted liver |
| 39 | 4661761000006116  | Orthotopic transplantation of liver                                       |
| 40 | 270234015         | Transplantation of liver NOS                                              |
| 41 | 2676200013        | Orthotopic transplantation of whole liver                                 |
| 42 | 7767241000006119  | Doppler ultrasound of transplanted liver                                  |
| 43 | 7167121000006113  | Hyperacute rejection of liver transplant                                  |
| 44 | 11910741000006116 | [V]Liver transplanted                                                     |
| 45 | 822591000006117   | Heterotopic liver transplant                                              |
| 46 | 30458014          | Transplantation of liver                                                  |
| 47 |                   |                                                                           |
| 48 | 3973121000006115  | Anaesthesia for liver transplant                                          |
| 49 | 7767231000006112  | Doppler ultrasound scan of transplanted liver                             |
| 50 |                   |                                                                           |
| 51 | 460651015         | Transplanted liver present                                                |
| 52 | 8325791000006114  | MRI angiogram of transplanted liver                                       |
| 53 | 7167181000006112  | Accelerated rejection of liver transplant                                 |
| 54 | 7767221000006114  | Doppler ultrasonography of transplanted liver                             |
| 55 | 7565141000006116  | Doppler ultrasound of transplant liver                                    |
| 56 |                   |                                                                           |
| 57 | 4661751000006118  | Orthotopic liver transplant                                               |
| 58 | 500401000006116   | Auxillary liver transplant                                                |
| 59 | 270233014         | Other specified transplantation of liver                                  |
| 60 | 2560521000006110  | Transplanted liver                                                        |

|    |                  |                                                      |
|----|------------------|------------------------------------------------------|
| 1  |                  |                                                      |
| 2  | 8325761000006118 | Ultrasonography guided biopsy of transplanted liver  |
| 3  | 8325871000006116 | CT guided biopsy of transplanted liver               |
| 4  | 8325481000006115 | Fluoroscopic angiogram of transplanted liver         |
| 5  | 5538541000006110 | Entire transplanted liver                            |
| 6  | 376141000000113  | Orthotopic transplantation of liver NEC              |
| 7  |                  |                                                      |
| 8  | 864281000006116  | Liver transplant                                     |
| 9  | 324976011        | Liver transplant failure and rejection               |
| 10 | 2937111000006111 | Liver transplant with recipient hepatectomy          |
| 11 | 8325861000006111 | CT of transplanted liver with contrast               |
| 12 |                  |                                                      |
| 13 | 8325781000006111 | Magnetic resonance angiography of transplanted liver |
| 14 | 8325891000006115 | MRI of transplanted liver                            |
| 15 | 5161081000006117 | US scan of transplant liver                          |
| 16 | 7133411000006113 | Acute rejection of liver transplant                  |
| 17 | 8325571000006119 | Fluoroscopic angioplasty of transplanted liver       |
| 18 |                  |                                                      |
| 19 | 4661781000006114 | Auxiliary liver transplant                           |
| 20 | 739931000006118  | Liver transplant with complication                   |
| 21 | 8293011000006118 | Live donor liver transplant                          |
| 22 | 5087201000006117 | Liver transplant disorder                            |
| 23 | 251929017        | H/O: liver recipient                                 |
| 24 | 4542661000006117 | History of liver recipient                           |
| 25 |                  |                                                      |
| 26 | 2786011000006112 | Hepatic transplantation                              |
| 27 |                  |                                                      |
| 28 |                  |                                                      |
| 29 |                  |                                                      |
| 30 |                  |                                                      |
| 31 |                  |                                                      |
| 32 |                  |                                                      |
| 33 |                  |                                                      |
| 34 |                  |                                                      |
| 35 |                  |                                                      |
| 36 |                  |                                                      |
| 37 |                  |                                                      |
| 38 |                  |                                                      |
| 39 |                  |                                                      |
| 40 |                  |                                                      |
| 41 |                  |                                                      |
| 42 |                  |                                                      |
| 43 |                  |                                                      |
| 44 |                  |                                                      |
| 45 |                  |                                                      |
| 46 |                  |                                                      |
| 47 |                  |                                                      |
| 48 |                  |                                                      |
| 49 |                  |                                                      |
| 50 |                  |                                                      |
| 51 |                  |                                                      |
| 52 |                  |                                                      |
| 53 |                  |                                                      |
| 54 |                  |                                                      |
| 55 |                  |                                                      |
| 56 |                  |                                                      |
| 57 |                  |                                                      |
| 58 |                  |                                                      |
| 59 |                  |                                                      |
| 60 |                  |                                                      |



1  
2  
3  
4  
5  
6  
7  
8  
9  
10  
11  
12  
13  
14  
15  
16  
17  
18  
19  
20  
21  
22  
23  
24  
25  
26  
27  
28  
29  
30  
31  
32  
33  
34  
35  
36  
37  
38  
39  
40  
41  
42  
43  
44  
45  
46  
47  
48  
49  
50  
51  
52  
53  
54  
55  
56  
57  
58  
59  
60

For peer review only

1  
2  
3  
4  
5  
6  
7  
8  
9  
10  
11  
12  
13  
14  
15  
16  
17  
18  
19  
20  
21  
22  
23  
24  
25  
26  
27  
28  
29  
30  
31  
32  
33  
34  
35  
36  
37  
38  
39  
40  
41  
42  
43  
44  
45  
46  
47  
48  
49  
50  
51  
52  
53  
54  
55  
56  
57  
58  
59  
60

e

For peer review only

1  
2  
3  
4  
5  
6  
7  
8  
9  
10  
11  
12  
13  
14  
15  
16  
17  
18  
19  
20  
21  
22  
23  
24  
25  
26  
27  
28  
29  
30  
31  
32  
33  
34  
35  
36  
37  
38  
39  
40  
41  
42  
43  
44  
45  
46  
47  
48  
49  
50  
51  
52  
53  
54  
55  
56  
57  
58  
59  
60

For peer review only

1  
2  
3  
4  
5  
6  
7  
8  
9  
10  
11  
12  
13  
14  
15  
16  
17  
18  
19  
20  
21  
22  
23  
24  
25  
26  
27  
28  
29  
30  
31  
32  
33  
34  
35  
36  
37  
38  
39  
40  
41  
42  
43  
44  
45  
46  
47  
48  
49  
50  
51  
52  
53  
54  
55  
56  
57  
58  
59  
60

For peer review only

1  
2  
3  
4  
5  
6  
7  
8  
9  
10  
11  
12  
13  
14  
15  
16  
17  
18  
19  
20  
21  
22  
23  
24  
25  
26  
27  
28  
29  
30  
31  
32  
33  
34  
35  
36  
37  
38  
39  
40  
41  
42  
43  
44  
45  
46  
47  
48  
49  
50  
51  
52  
53  
54  
55  
56  
57  
58  
59  
60

For peer review only

1  
2  
3  
4  
5  
6  
7  
8  
9  
10  
11  
12  
13  
14  
15  
16  
17  
18  
19  
20  
21  
22  
23  
24  
25  
26  
27  
28  
29  
30  
31  
32  
33  
34  
35  
36  
37  
38  
39  
40  
41  
42  
43  
44  
45  
46  
47  
48  
49  
50  
51  
52  
53  
54  
55  
56  
57  
58  
59  
60

For peer review only

1  
2  
3  
4  
5  
6  
7  
8  
9  
10  
11  
12  
13  
14  
15  
16  
17  
18  
19  
20  
21  
22  
23  
24  
25  
26  
27  
28  
29  
30  
31  
32  
33  
34  
35  
36  
37  
38  
39  
40  
41  
42  
43  
44  
45  
46  
47  
48  
49  
50  
51  
52  
53  
54  
55  
56  
57  
58  
59  
60

For peer review only

1  
2  
3  
4  
5  
6  
7  
8  
9  
10  
11  
12  
13  
14  
15  
16  
17  
18  
19  
20  
21  
22  
23  
24  
25  
26  
27  
28  
29  
30  
31  
32  
33  
34  
35  
36  
37  
38  
39  
40  
41  
42  
43  
44  
45  
46  
47  
48  
49  
50  
51  
52  
53  
54  
55  
56  
57  
58  
59  
60

For peer review only



1  
2  
3  
4  
5  
6  
7  
8  
9  
10  
11  
12  
13  
14  
15  
16  
17  
18  
19  
20  
21  
22  
23  
24  
25  
26  
27  
28  
29  
30  
31  
32  
33  
34  
35  
36  
37  
38  
39  
40  
41  
42  
43  
44  
45  
46  
47  
48  
49  
50  
51  
52  
53  
54  
55  
56  
57  
58  
59  
60

For peer review only

: 1A)

|    |             |                                           |
|----|-------------|-------------------------------------------|
| 1  |             |                                           |
| 2  | ICD-10 code | Term                                      |
| 3  | J01         | Transplantation of liver                  |
| 4  | J01.1       | ORTHOTOPIC TRANSPLANTATION OF LIVER NEC   |
| 5  | J01.2       | HETEROTOPIC TRANSPLANTATION OF LIVER      |
| 6  | J01.3       | REPLACEMENT OF PREVIOUS LIVER TRANSPLANT  |
| 7  | J01.4       | TRANSPLANTATION OF LIVER CELLS            |
| 8  | J01.5       | ORTHOTOPIC TRANSPLANTATION OF WHOLE LIVER |
| 9  | J01.8       | OTHER SPECIFIED                           |
| 10 | J01.9       | UNSPECIFIED                               |
| 11 |             |                                           |
| 12 |             |                                           |
| 13 |             |                                           |
| 14 |             |                                           |
| 15 |             |                                           |
| 16 |             |                                           |
| 17 |             |                                           |
| 18 |             |                                           |
| 19 |             |                                           |
| 20 |             |                                           |
| 21 |             |                                           |
| 22 |             |                                           |
| 23 |             |                                           |
| 24 |             |                                           |
| 25 |             |                                           |
| 26 |             |                                           |
| 27 |             |                                           |
| 28 |             |                                           |
| 29 |             |                                           |
| 30 |             |                                           |
| 31 |             |                                           |
| 32 |             |                                           |
| 33 |             |                                           |
| 34 |             |                                           |
| 35 |             |                                           |
| 36 |             |                                           |
| 37 |             |                                           |
| 38 |             |                                           |
| 39 |             |                                           |
| 40 |             |                                           |
| 41 |             |                                           |
| 42 |             |                                           |
| 43 |             |                                           |
| 44 |             |                                           |
| 45 |             |                                           |
| 46 |             |                                           |
| 47 |             |                                           |
| 48 |             |                                           |
| 49 |             |                                           |
| 50 |             |                                           |
| 51 |             |                                           |
| 52 |             |                                           |
| 53 |             |                                           |
| 54 |             |                                           |
| 55 |             |                                           |
| 56 |             |                                           |
| 57 |             |                                           |
| 58 |             |                                           |
| 59 |             |                                           |
| 60 |             |                                           |

For peer review only

|    |           |
|----|-----------|
| 1  |           |
| 2  | Medcodeid |
| 3  | 11300012  |
| 4  | 23820010  |
| 5  | 73622018  |
| 6  | 148427014 |
| 7  | 178739011 |
| 8  | 251269010 |
| 9  | 251644018 |
| 10 | 264629018 |
| 11 | 264630011 |
| 12 | 264631010 |
| 13 | 264634019 |
| 14 | 264637014 |
| 15 | 264638016 |
| 16 | 264639012 |
| 17 | 264640014 |
| 18 | 264645016 |
| 19 | 297266016 |
| 20 | 297267013 |
| 21 | 297281010 |
| 22 | 297282015 |
| 23 | 297283013 |
| 24 | 297284019 |
| 25 | 297289012 |
| 26 | 297290015 |
| 27 | 297295013 |
| 28 | 297296014 |
| 29 | 297300010 |
| 30 | 297302019 |
| 31 | 297303012 |
| 32 | 297311019 |
| 33 | 297312014 |
| 34 | 297313016 |
| 35 | 297314010 |
| 36 | 297315011 |
| 37 | 297321010 |
| 38 | 297324019 |
| 39 | 297325018 |
| 40 | 297330019 |
| 41 | 299334015 |
| 42 | 299336018 |
| 43 | 299337010 |
| 44 | 299345017 |
| 45 | 345225017 |
| 46 | 345275015 |
| 47 | 345311015 |
| 48 | 345318014 |
| 49 | 345321011 |
| 50 | 345323014 |
| 51 | 345345010 |

For peer review only

1  
2 399395015  
3 399408014  
4 450602015  
5 450603013  
6 453344019  
7 459233015  
8 459234014  
9 472410017  
10 472411018  
11 477355017  
12 478024019  
13 495804010  
14 500033015  
15 512000013  
16 1489345013  
17 1780267013  
18 1780375016  
19 2159216019  
20 2159223018  
21 2159225013  
22 2159227017  
23 2159274014  
24 2474650018  
25 2478828012  
26 2533403014  
27 2548491016  
28 2550890017  
29 2692343011  
30 3506708010  
31 3511291019  
32 10791000006116  
33 103531000006110  
34 125721000006111  
35 137801000000112  
36 138671000000116  
37 138681000000119  
38 138691000000117  
39 138701000000117  
40 139021000000118  
41 139161000000110  
42 141981000000118  
43 141991000000116  
44 142041000000115  
45 142051000000117  
46 148591000006114  
47 154851000000115  
48 166001000000113  
49 223811000000118  
50 230321000006117  
51 245341000006117

For peer review only

1  
2 245351000006115  
3 245361000006118  
4 301541000000116  
5 307861000000113  
6 307881000000116  
7 307901000000118  
8 362161000006110  
9 363451000006114  
10 379901000006113  
11 405571000006113  
12 406781000000119  
13 425631000006118  
14 647301000006112  
15 736371000006112  
16 743461000006119  
17 800721000006115  
18 851121000006117  
19 883041000006118  
20 897431000006113  
21 905881000006111  
22 916571000006117  
23 918541000006112  
24 918551000006114  
25 918561000006111  
26 918591000006115  
27 918601000006111  
28 931251000006112  
29 931711000006118  
30 1013171000006112  
31 1013181000006110  
32 1013191000006113  
33 1175991000000119  
34 1176031000000114  
35 1176071000000111  
36 1176241000000114  
37 1176301000000117  
38 1176341000000119  
39 1176381000000110  
40 1673671000006116  
41 1699591000006112  
42 1699611000006118  
43 1741271000006111  
44 1741281000006114  
45 1776671000006116  
46 1855731000006116  
47 1855741000006114  
48 1855761000006113  
49 1856761000006115  
50 1856771000006110  
51 1856781000006113

For peer review only

1  
2 1856791000006111  
3 1932071000006116  
4 1986841000006113  
5 2014871000006119  
6 2112801000000117  
7  
8 2297411000000115  
9 2444841000000117  
10 2466801000000118  
11 2502351000006114  
12 2502391000006115  
13 2587911000000119  
14 2589101000000111  
15 2612111000006116  
16 2612121000006112  
17 2721471000006114  
18 2811081000006110  
19 3093151000006111  
20 3093161000006113  
21 3093171000006118  
22 3210941000006113  
23 3210951000006110  
24 3323851000006114  
25 3668321000006119  
26 3668331000006116  
27 3668341000006114  
28 3719651000006117  
29 3719661000006115  
30 3759931000006112  
31 3796891000006117  
32 3796901000006118  
33 3878481000006113  
34 3878491000006111  
35 3878501000006115  
36 4052921000006118  
37 4540141000006110  
38 4755771000006114  
39 4769541000006119  
40 4769611000006117  
41 4769641000006118  
42 4948491000006116  
43 5007101000006111  
44 5007121000006118  
45 5007131000006115  
46 5007171000006117  
47 5007261000006117  
48 5007321000006116  
49 5007351000006113  
50 5007361000006110  
51 5007541000006119  
52 5007551000006117

For peer review only

1 5007621000006113  
2 5007661000006119  
3 5007771000006116  
4 5007781000006118  
5 5007811000006116  
6 5007871000006113  
7 5007941000006110  
8 5007971000006119  
9 5008031000006115  
10 5008101000006110  
11 5008211000006119  
12 5008231000006113  
13 5023531000006114  
14 5067711000006114  
15 5192381000006111  
16 5300251000006119  
17 5300261000006117  
18 5300371000006115  
19 5614161000006114  
20 6028641000006114  
21 6369851000006112  
22 6908751000006116  
23 6997451000006113  
24 7069151000006119  
25 7220531000006114  
26 7265381000006118  
27 7306821000006113  
28 7306831000006111  
29 7512471000006111  
30 7758091000006113  
31 7840671000006115  
32 7861341000006115  
33 7863641000006114  
34 7863681000006115  
35 7952761000006111  
36 7955181000006111  
37 8024691000006119  
38 8025071000006110  
39 8029441000006110  
40 8031611000006111  
41 8053261000006111  
42 8056521000006114  
43 8079791000006114  
44 8089731000006115  
45 8191681000006117  
46 8214791000006114  
47 8259581000006110  
48 8260981000006117  
49 8289731000006113  
50 8289831000006117

For peer review only

1 8289881000006116  
2 8313881000006113  
3 11639661000006111  
4 11831381000006119  
5 12076991000006114  
6 13491221000006117  
7 13493091000006112  
8 13493111000006115  
9 13493431000006116  
10 13495041000006116  
11 13499471000006116  
12 13500261000006114  
13 13503061000006114  
14 13572191000006116  
15 13572931000006117  
16 13573141000006116  
17 13622561000006113  
18 13632801000006112  
19 13637841000006111  
20 13686241000006115  
21 13686271000006111  
22 13950881000006118  
23 14055041000006118  
24 300366019  
25 449935012  
26 451371010  
27 1212072018  
28 1227591017  
29 2474330011  
30 2476091017  
31 2548554013  
32 3509817019  
33 3521990012  
34 138981000000113  
35 139081000000117  
36 139091000000115  
37 149571000006118  
38 162111000000112  
39 306621000000116  
40 371641000000112  
41 426321000006116  
42 524511000006116  
43 907581000006119  
44 907591000006116  
45 908801000006114  
46 928621000006111  
47 966981000006112  
48 968341000006116  
49 1716631000000115  
50 1757281000006116

For peer review only



1  
2 1784651000006110  
3 1863321000006113  
4 1992451000006114  
5 1994761000006112  
6 2008521000006110  
7  
8 2008601000006116  
9 2901571000006113  
10 3142511000006112  
11 4057041000006110  
12 4193641000006111  
13 5011071000006114  
14 5011081000006112  
15 5011111000006118  
16 5011121000006114  
17 5011141000006119  
18 5011461000006111  
19 5011471000006116  
20 5011871000006119  
21 5960821000006117  
22 5960951000006117  
23 5960971000006110  
24 6348291000006115  
25 6348301000006119  
26 6349401000006115  
27 6837051000006119  
28 6846141000006118  
29 6990981000006114  
30 6990991000006112  
31 7071911000006114  
32 7703601000006113  
33 7855631000006111  
34 7861341000006115  
35 8014911000006110  
36 8026451000006117  
37 8044481000006118  
38 8196061000006110  
39 8264201000006110  
40 8265471000006116  
41 8453031000006117  
42 8453821000006113  
43 9912271000006112  
44 13718641000006112  
45 13909861000006114  
46 13909881000006116  
47 13909891000006118  
48 13909901000006119  
49 14182621000006113  
50 14194161000006118  
51 14194651000006114  
52 14194811000006114

For peer review only

1  
2 264499015  
3 411416011  
4 413750011  
5 3508956015  
6 3508962013  
7 3508965010  
8 3516948016  
9  
10 122361000006113  
11 122401000006115  
12 884521000006115  
13 884531000006117  
14 940051000006114  
15 940061000006111  
16 940071000006116  
17 940081000006118  
18 1160471000000111  
19 1682791000006112  
20 1726581000006116  
21 2115821000000118  
22 2118011000000114  
23 2126181000000114  
24 2127781000000110  
25 2539131000006116  
26 5010981000006119  
27 5011451000006114  
28 5866391000006119  
29 5866401000006117  
30 7568281000006111  
31 7597121000006117  
32 7618821000006118  
33 8195431000006118  
34 8274811000006116  
35 300312010  
36 300313017  
37 300321011  
38 300322016  
39 300411016  
40 300941014  
41 395780010  
42 451133011  
43 451134017  
44 267321000006114  
45 370701000006118  
46 542251000006112  
47 542261000006114  
48 543141000006110  
49 841051000006113  
50 1573101000006112  
51 1576261000006112  
52 1900601000006111

For peer review only

1  
2 1900651000006110  
3 2436731000000112  
4 2729551000000111  
5 2729571000000119  
6 5011041000006118  
7 5011051000006116  
8 5011061000006119  
9 5011091000006110  
10 5011101000006116  
11 5011131000006112  
12 5011291000006119  
13 5011331000006114  
14 5011351000006119  
15 5582311000006110  
16 7598981000006119  
17 7599001000006116  
18 7839991000006115  
19 8011371000006117  
20 296995010  
21 405339016  
22 1227592012  
23 3508952018  
24 3508955016  
25 3508958019  
26 3508961018  
27 3508964014  
28 3509777019  
29 3509790014  
30 3509794017  
31 3509799010  
32 3509810017  
33 3636133016  
34 605461000006117  
35 605481000006110  
36 605491000006113  
37 809421000006116  
38 1716621000000117  
39 1773371000006117  
40 4778181000006119  
41 4778201000006118  
42 5649201000006113  
43 7519441000006112  
44 13717171000006112  
45 13718601000006110  
46 13718621000006117  
47 14014251000006116  
48 14194191000006114  
49 14194211000006110  
50 14194281000006115  
51 14194331000006112

For peer review only

1  
2 14194491000006118  
3 14194571000006115  
4 14194611000006113  
5 14194641000006112  
6 14194661000006111  
7  
8 14194741000006118  
9 14194801000006111  
10 14194841000006113  
11 14194941000006115  
12 14194971000006111  
13  
14 300370010  
15 300371014  
16 411518010  
17 1780304018  
18 605501000006117  
19 909171000006115  
20  
21 MedCodeId  
22 100323011  
23 100638016  
24 104952014  
25 107018015  
26 107602013  
27 107661000006110  
28 107800019  
29 110721000006114  
30 111210017  
31 112508017  
32 114794013  
33 1148731000000112  
34 11903671000006114  
35 11904601000006118  
36 11904611000006115  
37 121721014  
38 1219655013  
39 1221108018  
40 1222437010  
41 1223979019  
42 1224865018  
43 1224974015  
44 1225697014  
45 1229775013  
46 1233040016  
47 1234144017  
48 1234731016  
49 124598014  
50 12465281000006112  
51 124689016  
52 12477641000006119  
53 125891000006119  
54 125901000006115  
55  
56  
57  
58  
59  
60

For peer review only

1  
2 125971000006114  
3 12704251000006113  
4 12704731000006113  
5 12717021000006115  
6 12725491000006112  
7  
8 127307018  
9 12733271000006111  
10 12759421000006112  
11 127990018  
12 130209011  
13 13165015  
14 132112014  
15 134251013  
16 134601000006111  
17 134744017  
18 136147016  
19 136148014  
20 137233019  
21 141723016  
22 142016013  
23 142653015  
24 143230018  
25 147444011  
26 1480894012  
27 1481810012  
28 1491762016  
29 1492251019  
30 151586018  
31 151829017  
32 151951000006115  
33 151961000006118  
34 1648061000000115  
35 1672021000006115  
36 1679791000006113  
37 1682241000006111  
38 1682791000006112  
39 1705661000006112  
40 1728581000006115  
41 1763331000006113  
42 1772621000006118  
43 1774931000006117  
44 1776211019  
45 1777664015  
46 1777666018  
47 1778099018  
48 1778554019  
49 1780951000006111  
50 1781041000006119  
51 1784692011  
52 1785557019

For peer review only

1  
2 1786041000006110  
3 1786065018  
4 1786163010  
5 178743010  
6 178750014  
7 18091019  
8 1815931000006114  
9 1815951000006119  
10 1815971000006112  
11 1815981000006110  
12 1846861000006111  
13 1858901000006117  
14 187765019  
15 187824013  
16 1883621000006119  
17 198171000006110  
18 198381000006110  
19 19943011  
20 19944017  
21 206411014  
22 207847010  
23 2108221000000110  
24 211331000006117  
25 2122001000000116  
26 2168441000000115  
27 220771000000110  
28 221361000006118  
29 223801000000115  
30 2267591000000110  
31 2283041000000116  
32 2283831000000117  
33 2326271000000114  
34 243291000006119  
35 244311000006117  
36 2475876012  
37 2475877015  
38 251539016  
39 2517761000006112  
40 2524111000006113  
41 2526611000006112  
42 2526621000006116  
43 2526631000006118  
44 2526651000006113  
45 2546861000006113  
46 2546871000006118  
47 254829017  
48 254833012  
49 254834018  
50 254835017  
51 254935018  
52  
53  
54  
55  
56  
57  
58  
59  
60

For peer review only

1  
2 254939012  
3 254940014  
4 254941013  
5 254944017  
6 254950010  
7 254951014  
8 255061010  
9 255062015  
10 2554211000006118  
11 2566251000006117  
12 2582941000006110  
13 2582951000006112  
14 2582961000006114  
15 2582971000006119  
16 2583601000006114  
17 2597431000006110  
18 2597441000006117  
19 2597451000006115  
20 2637771000000114  
21 264417019  
22 2650601000006118  
23 2665351000006114  
24 2665361000006111  
25 2665371000006116  
26 2665381000006118  
27 2674605012  
28 2692565012  
29 2726231000006116  
30 2730161000006118  
31 2730171000006113  
32 2730181000006111  
33 2730191000006114  
34 2730201000006112  
35 2767491000006113  
36 27731000006112  
37 2784591000006116  
38 2784601000006112  
39 2784611000006110  
40 280121000006113  
41 28047015  
42 2806371000006116  
43 2806381000006118  
44 2821931000006118  
45 2824381000006115  
46 2824391000006117  
47 2824401000006115  
48 2824411000006117  
49 2824421000006113  
50 2824431000006111  
51 2838078010

For peer review only

1  
2 2841061014  
3 286395017  
4 286639018  
5 286641017  
6 286642012  
7 286643019  
8 286644013  
9 286645014  
10 2880611000006115  
11 2880621000006111  
12 2880631000006114  
13 288115019  
14 288116018  
15 2894411000006110  
16 2894421000006119  
17 2900005013  
18 2900031000006111  
19 2900041000006118  
20 2900051000006116  
21 2900061000006119  
22 2901621000006111  
23 2901631000006114  
24 2905521000006110  
25 2905541000006115  
26 2905551000006118  
27 2905561000006116  
28 2905571000006111  
29 2905581000006114  
30 2905591000006112  
31 2905601000006116  
32 2905611000006118  
33 2905631000006112  
34 2905641000006119  
35 2912671000006115  
36 293326016  
37 293544011  
38 293813012  
39 2949121000006114  
40 2966061000006116  
41 2966101000006118  
42 296838010  
43 296840017  
44 296841018  
45 2968551000006111  
46 2968561000006113  
47 2968571000006118  
48 296884017  
49 296959019  
50 296966018  
51 296982017

For peer review only



1  
2 296987011  
3 297037012  
4 297041011  
5 297043014  
6 297045019  
7 297107018  
8 297108011  
9 297112017  
10 297117011  
11 297118018  
12 297120015  
13 297122011  
14 297123018  
15 297125013  
16 297127017  
17 297130012  
18 297131011  
19 297132016  
20 297177019  
21 297179016  
22 297180018  
23 297181019  
24 297182014  
25 297190014  
26 297195016  
27 297196015  
28 297210016  
29 297221013  
30 297223011  
31 297232013  
32 297233015  
33 297234014  
34 297238012  
35 297239016  
36 297241015  
37 297242010  
38 297243017  
39 297244011  
40 297522019  
41 297525017  
42 297539017  
43 2975521000006117  
44 2975531000006119  
45 2975541000006112  
46 2975551000006114  
47 2975561000006111  
48 2975571000006116  
49 2975581000006118  
50 2975591000006115  
51 2975601000006111

For peer review only

1  
2 2975611000006114  
3 2975621000006118  
4 297564019  
5 297581011  
6 297582016  
7 297583014  
8 297584015  
9 297588017  
10 297589013  
11 297591017  
12 297592012  
13 297593019  
14 297601018  
15 297602013  
16 297605010  
17 297607019  
18 297608012  
19 297610014  
20 297623019  
21 297625014  
22 297626010  
23 297627018  
24 2976311000006114  
25 2976321000006118  
26 297635015  
27 297636019  
28 297637011  
29 297639014  
30 297640011  
31 297641010  
32 297643013  
33 297644019  
34 297645018  
35 297646017  
36 297647014  
37 297654015  
38 297655019  
39 299241000000110  
40 299303019  
41 299304013  
42 299305014  
43 299306010  
44 299312017  
45 299313010  
46 299314016  
47 299321016  
48 299323018  
49 299329019  
50 299330012  
51 299332016  
52  
53  
54  
55  
56  
57  
58  
59  
60

For peer review only

1  
2 299377019  
3 299378012  
4 299379016  
5 299380018  
6 299388013  
7  
8 299389017  
9 299390014  
10 299391013  
11 299392018  
12 299393011  
13 299394017  
14  
15 300141000000119  
16 3001451000006118  
17 3001471000006111  
18 3001481000006114  
19 3001491000006112  
20 300389010  
21 3005741000006110  
22 3005751000006112  
23 300945017  
24 301341000006119  
25 301719013  
26 3028151000006111  
27 3028161000006113  
28 3051551000006111  
29 3051561000006113  
30 3101701000006117  
31 3101721000006110  
32 311610013  
33 311617011  
34 311933012  
35 311934018  
36 311935017  
37 311936016  
38 311937013  
39 311938015  
40 311939011  
41 311940013  
42 311941012  
43 311942017  
44 311943010  
45 311944016  
46 312580013  
47 312591018  
48 312638019  
49 3142311000006118  
50 3142321000006114  
51 3142331000006112  
52 3142341000006119  
53 3142351000006117  
54  
55  
56  
57  
58  
59  
60

For peer review only

1  
2 3142511000006112  
3 3142531000006118  
4 3142551000006113  
5 315671000000110  
6 3159741000006112  
7 3159751000006114  
8 3159761000006111  
9 3159771000006116  
10 3159791000006115  
11 3159801000006119  
12 3159811000006116  
13 3159821000006112  
14 3159831000006110  
15 3159841000006117  
16 3170061000006117  
17 3170081000006110  
18 317120013  
19 317127011  
20 317651000000113  
21 3195451000006114  
22 3208041000006113  
23 3240521000006115  
24 3240531000006117  
25 3247231000006116  
26 3247241000006114  
27 3247251000006111  
28 3247271000006118  
29 3247281000006115  
30 3253991000006119  
31 3254021000006118  
32 3256761000006118  
33 3288331000006116  
34 3288341000006114  
35 3288351000006111  
36 3288361000006113  
37 3288371000006118  
38 3293611000006112  
39 3293621000006116  
40 3293631000006118  
41 3293641000006111  
42 3293651000006113  
43 3293661000006110  
44 3293671000006115  
45 3293681000006117  
46 3319161000006112  
47 3325651000006114  
48 3325661000006111  
49 33622011  
50 3367711000006117  
51 3367721000006113

For peer review only

1 3377581000006110  
2 3380781000006113  
3 3380791000006111  
4 3380811000006110  
5 3380821000006119  
6 3380831000006116  
7 3380841000006114  
8 3381191000006118  
9 3381201000006115  
10 3381211000006117  
11 3416421000006111  
12 3426051000006115  
13 3426061000006118  
14 3426071000006113  
15 3441181000006115  
16 3441201000006119  
17 3441211000006116  
18 3441481000006110  
19 3441491000006113  
20 3441501000006117  
21 3445431000006112  
22 3445451000006117  
23 3446901000006115  
24 3446911000006117  
25 3446921000006113  
26 3446931000006111  
27 3446941000006118  
28 3446951000006116  
29 3446961000006119  
30 3446971000006114  
31 3446981000006112  
32 3449761000006113  
33 3449771000006118  
34 3449781000006115  
35 3449801000006116  
36 345037013  
37 345068012  
38 345121017  
39 345122012  
40 345221014  
41 345223012  
42 3455151000006111  
43 345594014  
44 345701012  
45 345771011  
46 345773014  
47 345780011  
48 3480751000006110  
49 3480761000006112  
50 3480771000006117

For peer review only

1  
2 348287011  
3 3483991000006113  
4 3484001000006116  
5 3484011000006118  
6 3484021000006114  
7 3484041000006119  
8 3484051000006117  
9 3484061000006115  
10 3486721000006115  
11 3501681000006110  
12 3501691000006113  
13 3501701000006113  
14 3501711000006111  
15 3501721000006115  
16 3501731000006117  
17 3501741000006110  
18 3501751000006112  
19 3501761000006114  
20 3532651000006115  
21 35440018  
22 3547281000006113  
23 3547301000006112  
24 3547311000006110  
25 3547321000006119  
26 3547331000006116  
27 3553301000006118  
28 3553311000006115  
29 3553321000006111  
30 3553331000006114  
31 3555041000006119  
32 356811012  
33 3569341000006114  
34 3569351000006111  
35 3569361000006113  
36 359459016  
37 359673017  
38 359699012  
39 359712012  
40 3601731000006114  
41 3601741000006116  
42 3601951000006116  
43 3613541000006112  
44 3614661000006114  
45 3614671000006119  
46 3614691000006118  
47 3667821000006111  
48 3671061000006110  
49 3671071000006115  
50 3691951000006119  
51 3691961000006117

For peer review only

1  
2 3691971000006112  
3 3694981000006113  
4 3694991000006111  
5 3695001000006116  
6 370681000006116  
7  
8 3720541000006119  
9 3720561000006115  
10 3720571000006110  
11 3746951000006112  
12 3746961000006114  
13 3753631000006115  
14 3763421000006110  
15 3763431000006113  
16 3763441000006115  
17 376791000006111  
18 3768201000006114  
19 3768211000006112  
20 3768221000006116  
21 3768241000006111  
22 3768251000006113  
23 3776451000006119  
24 3779961000006118  
25 383065014  
26 3845821000006119  
27 3845831000006116  
28 3845841000006114  
29 3845851000006111  
30 3845871000006118  
31 3846021000006116  
32 3846031000006118  
33 3846041000006111  
34 3846051000006113  
35 3884271000006114  
36 3889791000006116  
37 3889801000006115  
38 3889811000006117  
39 3889821000006113  
40 3898641000006114  
41 3898651000006111  
42 3898661000006113  
43 3927641000006114  
44 3927651000006111  
45 3927661000006113  
46 3931641000006118  
47 3931651000006116  
48 3945241000006118  
49 3945251000006116  
50 3945261000006119  
51 39846012  
52 3988981000006118  
53  
54  
55  
56  
57  
58  
59  
60

For peer review only

1  
2 3988991000006115  
3 399191000006111  
4 399201000006114  
5 399371000006112  
6 399400019  
7 399401000006110  
8 399420018  
9 399421019  
10 399422014  
11 399436016  
12 40055016  
13 4015801000006118  
14 4015811000006115  
15 402512016  
16 402513014  
17 402514015  
18 409341000006112  
19 411453017  
20 411454011  
21 411455012  
22 411456013  
23 411822012  
24 412051000006115  
25 41398015  
26 414541000006119  
27 414561000006115  
28 415146010  
29 415147018  
30 4177151000006119  
31 4177161000006117  
32 4177181000006110  
33 41961013  
34 41962018  
35 4196391000006115  
36 4196401000006118  
37 4196411000006115  
38 4196431000006114  
39 4196441000006116  
40 4196451000006119  
41 4196461000006117  
42 4196471000006112  
43 4196491000006113  
44 4196651000006117  
45 4196661000006115  
46 422941000006114  
47 42524012  
48 426301000006114  
49 428171000006118  
50 428581000006114  
51 428601000006116

For peer review only



1 4405181000006112  
2 4405191000006110  
3 4410181000006116  
4 4427721000006110  
5 4427731000006113  
6 4428511000006110  
7 448235011  
8 450830018  
9 451123015  
10 4539231000006115  
11 456401000006118  
12 4566571000006117  
13 4566621000006119  
14 4566641000006114  
15 4566651000006111  
16 4566661000006113  
17 4566681000006115  
18 4567631000006119  
19 4567691000006115  
20 4567711000006117  
21 4567731000006111  
22 4567791000006110  
23 4567891000006116  
24 4569041000006110  
25 4569061000006114  
26 4742071000006115  
27 47484015  
28 4759751000006118  
29 4759771000006111  
30 4759781000006114  
31 4759791000006112  
32 4759801000006113  
33 4759811000006111  
34 4759821000006115  
35 4759831000006117  
36 4759841000006110  
37 4759851000006112  
38 476701000006114  
39 4767941000006119  
40 4767951000006117  
41 4768661000006111  
42 4768671000006116  
43 4768681000006118  
44 4768691000006115  
45 4768701000006115  
46 4768711000006117  
47 4768731000006111  
48 4768741000006118  
49 4768751000006116  
50 4768761000006119

For peer review only

1  
2 4769091000006117  
3 4769101000006111  
4 4769111000006114  
5 4769281000006110  
6 4769291000006113  
7 4769321000006116  
8 4769341000006111  
9 4769391000006119  
10 4769421000006110  
11 4770411000006116  
12 4770721000006119  
13 4770761000006113  
14 4770841000006119  
15 4770871000006110  
16 4770891000006111  
17 4770931000006119  
18 4770951000006114  
19 4770971000006116  
20 4770991000006115  
21 4771001000006119  
22 478046010  
23 4782441000006114  
24 4782451000006111  
25 478396017  
26 47937012  
27 4819691000006111  
28 4819721000006118  
29 48512013  
30 48513015  
31 48515010  
32 486177011  
33 486695013  
34 494103012  
35 49474011  
36 49542018  
37 496154014  
38 496159016  
39 496911000006118  
40 497021000006113  
41 498020017  
42 498788015  
43 499491010  
44 499948010  
45 5005041000006118  
46 5005341000006116  
47 5005361000006117  
48 5005371000006112  
49 5005921000006112  
50 5005931000006110  
51 5005991000006114

For peer review only

1 5006171000006115  
2 5007001000006112  
3 5007011000006110  
4 5007031000006116  
5 5007041000006114  
6 5007921000006115  
7 5011691000006117  
8 5011701000006117  
9 5012271000006111  
10 5012321000006115  
11 5012331000006117  
12 5012341000006110  
13 5012351000006112  
14 5012361000006114  
15 504081000006111  
16 5141031000006112  
17 52052015  
18 52463013  
19 5381371000006113  
20 5381381000006111  
21 538601000006110  
22 542301000006117  
23 542991000006113  
24 543071000006115  
25 5501291000006119  
26 5501301000006118  
27 5501311000006115  
28 5501321000006111  
29 5501331000006114  
30 5509101000006115  
31 55351000006111  
32 55426011  
33 5573561000006115  
34 5577511000006113  
35 5611491000006112  
36 5614151000006112  
37 5614181000006116  
38 571541000006116  
39 584031000006114  
40 5904251000006117  
41 5904271000006110  
42 5944191000006113  
43 5944201000006111  
44 59911000006112  
45 6060631000006111  
46 6060641000006118  
47 6080016  
48 614691000006113  
49 625401000006110  
50 625421000006117

For peer review only

1  
2 630491000006110  
3 631811000006111  
4 63319012  
5 633431000006115  
6 640991000006117  
7 641041000006119  
8 641211000000118  
9 641301000000114  
10 6461171000006118  
11 6476861000006119  
12 6476871000006114  
13 6476881000006112  
14 64875013  
15 6566121000006117  
16 6566131000006119  
17 6566141000006112  
18 6568031000006116  
19 6568041000006114  
20 6568051000006111  
21 6568061000006113  
22 6568081000006115  
23 6568091000006117  
24 6568101000006111  
25 6568111000006114  
26 6596741000006113  
27 6596751000006110  
28 6596761000006112  
29 6596771000006117  
30 6596791000006116  
31 6596801000006115  
32 6596811000006117  
33 6597711000006111  
34 6597721000006115  
35 6597731000006117  
36 6597741000006110  
37 6597751000006112  
38 6597761000006114  
39 6597771000006119  
40 6597811000006119  
41 6597821000006110  
42 6597831000006113  
43 6599291000006119  
44 6599301000006118  
45 6599321000006111  
46 6599331000006114  
47 660171000006114  
48 660231000006117  
49 6607251000006111  
50 6607261000006113  
51 6607271000006118

For peer review only

1  
2 661251000006116  
3 6617161000006116  
4 6617171000006111  
5 6617181000006114  
6 6617191000006112  
7  
8 6617201000006110  
9 6617211000006113  
10 66483014  
11 682621000006119  
12 682631000006116  
13 682641000006114  
14 682681000006115  
15 682691000006117  
16 682701000006117  
17  
18 682841000006110  
19 682861000006114  
20 682891000006118  
21  
22 68321016  
23 683431000006111  
24 6839012  
25  
26 695191000006119  
27 696641000006114  
28 699671000000115  
29 699731000000110  
30 699791000000111  
31 699911000000117  
32 701491000006117  
33 7045281000006112  
34 7058051000006116  
35 7092351000006112  
36 7108161000006116  
37 716831000006114  
38 71981018  
39 72531016  
40 7289421000006111  
41 73325012  
42 734711000006110  
43 7349161000006111  
44 736381000006110  
45 740431000006115  
46 753451000006118  
47 761411000006111  
48 7620901000006112  
49 77128019  
50 7717281000006114  
51 7717301000006113  
52 7717311000006111  
53 7717321000006115  
54 7730241000006111  
55 7774171000006115  
56  
57  
58  
59  
60

For peer review only

1  
2 778591000006118  
3 78021014  
4 78022019  
5 81717011  
6 81719014  
7  
8 8193781000006112  
9 8328151000006111  
10 8328171000006118  
11 8328191000006117  
12 8328211000006116  
13 8328231000006110  
14 8328251000006115  
15 8328271000006113  
16 8328331000006119  
17 8328461000006117  
18 8328481000006110  
19 8328501000006117  
20 8328531000006113  
21 8328551000006118  
22 8328571000006111  
23 8328591000006112  
24 8342831000006112  
25 84200019  
26 84201015  
27 84272011  
28 84935014  
29 856091000006114  
30 857181000006110  
31 882961000006112  
32 883181000006113  
33 883191000006111  
34 89919017  
35 90229010  
36 90263012  
37 905781000006118  
38 905801000006119  
39 905821000006112  
40 905891000006114  
41 907241000006111  
42 907411000006113  
43 908811000006112  
44 908821000006116  
45 909021000006117  
46 94780015  
47 96850018  
48 9742014  
49 9822014  
50 983261000006119  
51 983271000006114  
52 983281000006112

For peer review only

1  
2 983291000006110  
3 983301000006111  
4 983311000006114  
5 99251000006111  
6  
7  
8  
9  
10  
11  
12  
13  
14  
15  
16  
17  
18  
19  
20  
21  
22  
23  
24  
25  
26  
27  
28  
29  
30  
31  
32  
33  
34  
35  
36  
37  
38  
39  
40  
41  
42  
43  
44  
45  
46  
47  
48  
49  
50  
51  
52  
53  
54  
55  
56  
57  
58  
59  
60

For peer review only

1  
2 Term  
3 Juvenile myoclonic epilepsy  
4 Status epilepticus  
5 Benign Rolandic epilepsy  
6 Gelastic epilepsy  
7 Epilepsy  
8 Witnessed epileptic seizure  
9 H/O: epilepsy  
10 Epilepsy monitoring  
11 Initial epilepsy assessment  
12 Follow-up epilepsy assessment  
13 Epilepsy associated problems  
14 Epilepsy drug side effect  
15 Epilepsy treatment changed  
16 Epilepsy treatment started  
17 Epilepsy treatment stopped  
18 Epilepsy monitoring NOS  
19 Epileptic seizures - atonic  
20 Epileptic seizures - akinetic  
21 Neonatal myoclonic epilepsy  
22 Epileptic seizures - clonic  
23 Epileptic seizures - myoclonic  
24 Epileptic seizures - tonic  
25 Other specified generalised convulsive epilepsy  
26 Generalised convulsive epilepsy NOS  
27 Partial epilepsy with impairment of consciousness  
28 Temporal lobe epilepsy  
29 Psychosensory epilepsy  
30 Epileptic automatism  
31 Partial epilepsy with impairment of consciousness NOS  
32 Somatosensory epilepsy  
33 Partial epilepsy with autonomic symptoms  
34 Visceral reflex epilepsy  
35 Visual reflex epilepsy  
36 Unilateral epilepsy  
37 Kojevnikov's epilepsy  
38 Other forms of epilepsy  
39 Cursive (running) epilepsy  
40 Other forms of epilepsy NOS  
41 [X]Other generalized epilepsy and epileptic syndromes  
42 [X]Other epilepsy  
43 [X]Other status epilepticus  
44 [X]Status epilepticus, unspecified  
45 Focal epilepsy  
46 Juvenile absence epilepsy  
47 Severe myoclonic epilepsy in infancy  
48 Drug-induced epilepsy  
49 Menstrual epilepsy  
50 Nocturnal epilepsy  
51 Complex partial status epilepticus



1 Progressive myoclonic epilepsy  
2 Epilepsy NOS  
3 Motor epilepsy  
4 Jacksonian, focal or motor epilepsy  
5 Epileptic seizure  
6 Epilepsy control good  
7 Epilepsy control poor  
8 Tonic-clonic epilepsy  
9 Grand mal epilepsy  
10 Psychomotor epilepsy  
11 Alcohol-induced epilepsy  
12 Pykno-epilepsy  
13 Generalised convulsive epilepsy  
14 Photosensitive epilepsy  
15 Transient epileptic amnesia  
16 Epilepsy medication review  
17 Epilepsy care arrangement  
18 Epilepsy severity  
19 Emergency epilepsy treatment since last appointment  
20 Suspected epilepsy  
21 Epilepsy confirmed  
22 Complex partial epileptic seizure  
23 Stress-induced epilepsy  
24 Traumatic epilepsy  
25 No epilepsy drug side effects  
26 Epilepsy monitoring verbal invite  
27 Generalised non-convulsive epilepsy  
28 Seen in epilepsy clinic  
29 Pyridoxine-dependent epilepsy  
30 Recurrent complex partial epilepsy  
31 Other specified generalised nonconvulsive epilepsy  
32 Tonic-clonic epilepsy  
33 Status epilepticus, unspecified  
34 Epilepsy limits activities  
35 Epilepsy screening administration  
36 Epilepsy screening first invitation  
37 Epilepsy screening second invitation  
38 Epilepsy screening third invitation  
39 Exception reporting - epilepsy quality indicators  
40 Excepted from epilepsy quality indicators - informed dissent  
41 Epilepsy restricts employment  
42 Epilepsy prevents employment  
43 Epilepsy does not limit activities  
44 Epilepsy management plan given  
45 Sensory induced epilepsy  
46 Epilepsy impairs education  
47 Did not attend epilepsy clinic  
48 Generalised epilepsy  
49 Petit mal (minor) epilepsy  
50 Localisation-related epilepsy

1  
2 Partial epilepsy  
3 Partial epilepsy without impairment of consciousness OS  
4 Simple partial epileptic seizure  
5 Epilepsy monitoring call first letter  
6 Epilepsy monitoring call second letter  
7 Epilepsy monitoring call third letter  
8 Acquired epileptic aphasia  
9  
10 [X]Antiepilept + antiparksn drug caus advers eff therap use  
11 [X]Epileptic psychosis NOS  
12 Antiepileptic adverse reaction  
13 Epilepsy monitoring telephone invite  
14 [X]Schizophrenia-like psychosis in epilepsy  
15 Epileptic absences  
16  
17 Localization-related(focal)(partial)idiopathic epilepsy and epileptic syndromes with seizures of localised onset  
18 Limbic system epilepsy  
19 Generalised nonconvulsive epilepsy NOS  
20 Partial epilepsy  
21 Petit mal epilepsy  
22 Post traumatic epilepsy  
23 [RFC] Epilepsy/convulsion  
24 Epilepsy monitoring  
25 Initial epilepsy assessment  
26 Follow-up epilepsy assessment  
27 Epilepsy associated problems  
28 Epilepsy drug side effects  
29 Nocturnal epilepsy  
30 Excepted from epilepsy quality indicators - patient unsuitable  
31 Early infantile epileptic encephalopathy with suppression bursts  
32 Adverse reaction to Antiepileptics  
33 Adverse reaction to Drugs Used In Control Of Epilepsy  
34 Adverse reaction to Drugs Used In Status Epilepticus  
35 Contraceptive advice for patients with epilepsy  
36 Pre-conception advice for patients with epilepsy  
37 Pregnancy advice for patients with epilepsy  
38 Pregnancy advice for patients with epilepsy not indicated  
39 Contraceptive advice for patients with epilepsy declined  
40 Pre-conception advice for patients with epilepsy declined  
41 Pregnancy advice for patients with epilepsy declined  
42 Epilepsy treatment continued  
43 Epilepsy monitoring call first letter  
44 Epilepsy monitoring call third letter  
45 Contraceptive advice for patients with epilepsy not indicated  
46 Pre-conception advice for patients with epilepsy not indicated  
47 Reason for referral: Epilepsy  
48 Epilepsy monitoring administration  
49 Epilepsy monitoring in primary care  
50 Epilepsy monitoring in secondary care  
51 Epilepsy treatment compliance  
52 Epilepsy treatment compliance good  
53 Epilepsy treatment compliance poor

1  
2 Epilepsy monitoring default  
3 3D study - problems with epilepsy management  
4 Provision of information about SUDEP (sudden unexpected death in epilepsy)  
5 Contraceptive advice for patients on valproate for epilepsy  
6 Referral to epilepsy clinic  
7 Referral to epilepsy service  
8 Paediatric epilepsy care plan  
9 At risk of sudden unexpected death in epilepsy  
10 Epilepsia partialis continua  
11 Focal status epilepticus  
12 Neurological Disorders Depression Inventory in Epilepsy  
13 SUDEP - sudden unexpected death in epilepsy  
14 Epileptic absence status  
15 Non-convulsive status epilepticus with impaired consciousness  
16 Convulsive status epilepticus  
17 Generalized epilepsy  
18 Idiopathic generalised epilepsy  
19 Idiopathic generalized epilepsy  
20 Primary generalised epilepsy  
21 Temporal-central focal epilepsy  
22 Centrotemporal epilepsy  
23 Childhood absence epilepsy  
24 Symptomatic generalised epilepsy  
25 Symptomatic generalized epilepsy  
26 Secondary generalized epilepsy  
27 Post-traumatic epilepsy  
28 PTE - Post-traumatic epilepsy  
29 Unclassified epileptic seizures  
30 Reflex epilepsy  
31 Sensory-induced epilepsy  
32 Epileptic disorder  
33 Epileptic  
34 EP - Epilepsy  
35 Photogenic epilepsy  
36 History of epilepsy  
37 Epileptic drop attack  
38 Benign myoclonic epilepsy in infancy  
39 TLE - Temporal lobe epilepsy  
40 Mesial limbic epilepsy  
41 At risk of epileptic fits  
42 Benign frontal epilepsy of childhood  
43 Benign atypical partial epilepsy in childhood  
44 Epilepsy with recurrent unilateral seizures in children  
45 Benign occipital epilepsy of childhood - early onset variant  
46 Frontal lobe epilepsy  
47 Opercular epilepsy  
48 Parietal lobe epilepsy  
49 Occipital lobe epilepsy  
50 Epilepsy with grand mal seizures on awakening  
51 Cryptogenic generalised epilepsy  
52  
53  
54  
55  
56  
57  
58  
59  
60

1 Myoclonic atstatic epilepsy  
2 Myoclonic absence epilepsy  
3 Cryptogenic myoclonic epilepsy  
4 Idiopathic myoclonic epilepsy  
5 Symptomatic myoclonic epilepsy  
6 Epilepsy undetermined whether focal or generalised  
7 Epilepsy with continuous spike wave during slow-wave sleep  
8 Secondary reading epilepsy  
9 Sleep-related epilepsy  
10 Eating epilepsy  
11 Non-convulsive status epilepticus without three per second spike wave  
12 Non-convulsive simple partial status epilepticus  
13 Epileptic psychosis  
14 Triple X syndrome, epilepsy, and hypogammaglobulinaemia  
15 Epilepsy monitoring status  
16 Generalised epileptiform discharges  
17 Generalized epileptiform discharges  
18 Bilateral periodic epileptiform discharges  
19 Localisation-related idiopathic epilepsy  
20 Epileptic fit  
21 Carbazepine antiepileptic  
22 Epilepsy monitoring call  
23 Refractory epilepsia partialis continua  
24 Non-epileptic myoclonus  
25 Epilepsy assessment  
26 Nonconvulsive status epilepticus  
27 Refractory epilepsy  
28 Intractable epilepsy  
29 Refractory juvenile myoclonic epilepsy  
30 X-linked epilepsy with learning disability and behaviour disorder syndrome  
31 Epileptic encephalopathy  
32 Epilepsy due to stroke  
33 Epilepsy with mesial temporal sclerosis  
34 Epilepsy co-occurrent and due to dementia  
35 Epilepsy telangiectasia syndrome  
36 Epilepsy of infancy with migrating focal seizures  
37 Epileptic dementia with behavioural disturbance  
38 Intractable partial temporal lobe epilepsy with impairment of consciousness  
39 DNA (did not attend) epilepsy clinic  
40 Epilepsy in pregnancy  
41 Atypical absence epilepsy  
42 Epilepsy care education  
43 Epilepsy monitoring telephone invitation  
44 Infantile spasms with status epilepticus  
45 Petit-mal epilepsy  
46 Epilepsy screening invitation  
47 Referral for epilepsy review  
48 Under care of epilepsy specialist nurse  
49 Epilepsy annual review  
50 Epilepsy care management

1 Epilepsy self-management plan review  
2 Paediatric epilepsy service  
3 Referral to epilepsy specialist nurse declined  
4 Infantile-onset symptomatic epilepsy syndrome  
5 STXBP1 encephalopathy with epilepsy  
6 Benign familial mesial temporal lobe epilepsy  
7 Benign occipital lobe epilepsy  
8 Benign partial epilepsy of infancy with complex partial seizures  
9 Mesial temporal lobe epilepsy with hippocampal sclerosis  
10 New-onset refractory status epilepticus  
11 Cortical dysplasia with focal epilepsy syndrome  
12 Infantile epileptic dyskinetic encephalopathy  
13 Early-onset spastic ataxia, myoclonic epilepsy, neuropathy syndrome  
14 KCNQ2-related epileptic encephalopathy  
15 Myoclonic epilepsy in non-progressive encephalopathy  
16 Cryptogenic late-onset epileptic spasms  
17 Congenital muscular dystrophy with intellectual disability and severe epilepsy  
18 Familial temporal lobe epilepsy  
19 Familial mesial temporal lobe epilepsy with febrile seizures  
20 Benign childhood epilepsy with centrotemporal spikes, refractory  
21 Benign childhood epilepsy with centrotemporal spikes, non-refractory  
22 Epilepsy due to infectious encephalitis  
23 Scar epilepsy  
24 Cerebellar stroke syndrome  
25 Admission to stroke unit  
26 H/O: Stroke in last year  
27 Occlusive stroke  
28 [V]Personal history of stroke  
29 Referral to stroke clinic  
30 H/O: stroke  
31 Haemorrhagic stroke monitoring  
32 Left hemispheric cerebellar artery embolism with stroke  
33 PASS (Postural Assessment Scale for Stroke Patients) score  
34 Exception reporting - stroke quality indicators  
35 Excepted from stroke quality indicators - patient unsuitable  
36 Excepted from stroke quality indicators - informed dissent  
37 Sequelae of stroke, not spec'd as h'morrhage or infarction  
38 Did not attend stroke clinic  
39 Seen in stroke clinic  
40 Delivery of rehabilitation for stroke  
41 [X]Sequelae of stroke, not spec'd as h'morrhage or infarction  
42 Brainstem stroke syndrome  
43 [RFC] Stroke/CVA  
44 [RFC] Stroke  
45 [RFC] Stroke  
46 MELAS - Mitochondrial encephalopathy, lactic acidosis and stroke-like episodes  
47 Referral to multidisciplinary stroke function improvement service  
48 Annual Stroke/CVA blood test  
49 Suspected stroke  
50 Suspected stroke

1 Referral for multidisciplinary stroke function improvement declined  
2 Referral by stroke nurse specialist  
3 VTE risk assessment - acute stroke  
4 Referral to stroke rehabilitation service  
5 Referral to community stroke service  
6 Discharge from community stroke service  
7 Completed stroke  
8 Juvenile myopathy, encephalopathy, lactic acidosis AND stroke  
9 Brain stem stroke  
10 Nonparalytic stroke  
11 Total anterior cerebral circulation stroke  
12 TACS - Total anterior cerebral circulation stroke  
13 Partial anterior cerebral circulation stroke  
14 PACS - Partial anterior cerebral circulation stroke  
15 Posterior cerebral circulation stroke  
16 Anterior circulation stroke of uncertain pathology  
17 Posterior circulation stroke of uncertain pathology  
18 Spinal cord stroke  
19 Referral to stroke service  
20 Discharge from stroke service  
21 Seen by stroke service  
22 Thrombotic stroke  
23 Embolic stroke  
24 Neonatal stroke  
25 Basal ganglion stroke  
26 Cardioembolic stroke  
27 Ischaemic stroke  
28 Ischemic stroke  
29 Thalamic stroke  
30 Post stroke pain  
31 Cerebral ischaemic stroke due to small artery occlusion  
32 Epilepsy due to stroke  
33 Sequela of cardioembolic stroke  
34 DNA (did not attend) stroke clinic  
35 Ischaemic stroke without coma  
36 Did not attend stroke review  
37 Management of stroke rehabilitation  
38 Acute stroke care  
39 Haemorrhagic stroke  
40 Emergency hospital admission to stroke service  
41 Cerebellar stroke  
42 History of ischaemic stroke  
43 Cerebral ischaemic stroke due to dissection of artery  
44 Cerebral ischaemic stroke due to global hypoperfusion with watershed infarct  
45 Cerebral ischaemic stroke due to hypercoagulable state  
46 Cerebral ischaemic stroke co-occurrent with subarachnoid haemorrhage  
47 Cryptogenic stroke  
48 Acute stroke due to occlusion of left posterior cerebral artery  
49 Acute stroke of brainstem  
50 Acute ischaemic stroke

1 Stroke monitoring  
 2 Stroke in the puerperium  
 3 Central post-stroke pain  
 4 Stroke due to basilar artery thrombus  
 5 Stroke due to thrombus of right middle cerebral artery  
 6 Stroke due to thrombus of left middle cerebral artery  
 7 Stroke care plan  
 8 Stroke due to cerebral arterial occlusion  
 9 Stroke unspecified  
 10 Stroke/CVA - undefined  
 11 Stroke  
 12 Stroke monitoring administration  
 13 Stroke monitoring invite 1  
 14 Stroke monitoring invite 2  
 15 Stroke monitoring invite 3  
 16 Stroke 6 month review  
 17 Mitoch myopath/encephalopath/lactic acidosis/stroke-like episode  
 18 Central post-stroke pain  
 19 Stroke self-management plan review  
 20 Stroke self-management plan agreed  
 21 Stroke annual review  
 22 Stroke initial post discharge review  
 23 Stroke rehabilitation  
 24 Stroke  
 25 Stroke of uncertain pathology  
 26 Stroke test positive  
 27 Stroke test negative  
 28 Stroke clinic  
 29 Stroke impact scale version 3.0  
 30 Stroke impact scale version 3.0 score  
 31 Stroke/cerebrovascular accident 6 month review  
 32 Stroke medicine  
 33 Cerebral infarct due to thrombosis of precerebral arteries  
 34 Cerebral infarction due to embolism of precerebral arteries  
 35 Cerebral infarction due to thrombosis of cerebral arteries  
 36 Cerebral infarction due to embolism of cerebral arteries  
 37 Sequelae of cerebral infarction  
 38 [X]Other cerebral infarction  
 39 Cerebral infarction  
 40 Left sided cerebral infarction  
 41 Right sided cerebral infarction  
 42 Occlusion and stenosis of cerebral arteries, not resulting in cerebral infarction  
 43 [X]Cerebrl infarctn due/unspcf occlusn or sten/cerebrl artr  
 44 Cerebral infarction due to cerebral venous thrombosis, non-pyogenic  
 45 Cerebral infarction due to occlusion of precerebral artery  
 46 Cerebrl infarctn due/unspcf occlusn or sten/cerebrl artr  
 47 Cerebral autosomal dominant arteriopathy with subcortical infarcts and leukoencephalopathy  
 48 Cerebral infarction with haemorrhagic transformation  
 49 Cause of Death- Cerebral Infarct  
 50 Surveillance of Cerebral Palsy in Europe classification - predominant pattern B.2 - sequelae of intraventricular I

1  
2 Surveillance of Cerebral Palsy in Europe classification - predominant pattern C.3 - infarct of the middle cerebra  
3 Old cerebral infarction on imaging  
4 Cerebral infarction due to occlusion of cerebral artery  
5 Cerebral infarction due to stenosis of cerebral artery  
6 Anterior cerebral circulation infarction  
7 Total anterior cerebral circulation infarction  
8 TACI - Total anterior cerebral circulation infarction  
9 Partial anterior cerebral circulation infarction  
10 PACI - Partial anterior cerebral circulation infarction  
11 Posterior cerebral circulation infarction  
12 Haemorrhagic cerebral infarction  
13 Anterior cerebral circulation haemorrhagic infarction  
14 Posterior cerebral circulation haemorrhagic infarction  
15 Occipital cerebral infarction  
16 Cerebral infarction due to embolism of middle cerebral artery  
17 Cerebral infarction due to thrombosis of middle cerebral artery  
18 Silent cerebral infarct  
19 Sequela of ischaemic cerebral infarction  
20 Cerebral degeneration in mucopolysaccharidoses  
21 Cerebrovascular accident  
22 [V]Personal history of cerebrovascular accident (CVA)  
23 Cerebrovascular accident due to thrombus of left carotid artery  
24 Cerebrovascular accident due to thrombus of basilar artery  
25 Cerebrovascular accident due to thrombus of right carotid artery  
26 Cerebrovascular accident due to thrombus of right middle cerebral artery  
27 Cerebrovascular accident due to thrombus of left middle cerebral artery  
28 Cerebrovascular accident due to occlusion of left pontine artery  
29 Cerebrovascular accident due to occlusion of right posterior cerebral artery  
30 Cerebrovascular accident due to occlusion of left middle cerebral artery  
31 Cerebrovascular accident due to occlusion of left posterior cerebral artery  
32 Cerebrovascular accident due to occlusion of right middle cerebral artery  
33 Cerebrovascular accident due to occlusion of right middle cerebral artery by embolus  
34 CVA - cerebrovascular accident due to cerebral artery occlusion  
35 CVA - cerebrovascular accident in the puerperium  
36 CVA - Cerebrovascular accident  
37 History of cerebrovascular accident  
38 Suspected cerebrovascular accident  
39 Cerebrovascular accident care plan  
40 Left sided cerebral hemisphere cerebrovascular accident  
41 Right sided cerebral hemisphere cerebrovascular accident  
42 Extension of cerebrovascular accident  
43 Cerebrovascular accident annual review  
44 Cerebrovascular accident due to stenosis of bilateral carotid arteries  
45 History of embolic cerebrovascular accident  
46 History of cerebrovascular accident due to ischaemia  
47 Cerebrovascular accident due to occlusion of bilateral pontine arteries  
48 Acute cerebrovascular accident due to stenosis of left carotid artery  
49 Acute cerebrovascular accident due to occlusion of left middle cerebral artery  
50 Acute cerebrovascular accident due to occlusion of right posterior cerebral artery  
51 Acute cerebrovascular accident due to occlusion of right middle cerebral artery



1 Acute cerebrovascular accident due to occlusion of right carotid artery  
2 Acute cerebrovascular accident due to occlusion of left carotid artery  
3 Acute cerebrovascular accident of basal ganglia  
4 Acute cerebrovascular accident of brainstem  
5 Acute cerebrovascular accident due to stenosis of right carotid artery  
6 Acute cerebrovascular accident due to occlusion of right cerebellar artery  
7 Acute cerebrovascular accident due to ischaemia  
8 Acute cerebrovascular accident due to occlusion of left cerebellar artery  
9 Acute cerebrovascular accident due to embolism of right middle cerebral artery  
10 Acute cerebrovascular accident due to embolism of left middle cerebral artery  
11 Left sided CVA  
12 Right sided CVA  
13 H/O: CVA  
14 CVA annual review  
15 CVA unspecified  
16 [RFC] CVA  
17 Term  
18 paraplegia  
19 subacute combined degeneration of spinal cord  
20 amyotonia congenita  
21 infantile spinal muscular atrophy  
22 myotonic cataract  
23 tay-sach's disease  
24 pelizaeus-merzbacher disease  
25 tetraplegia - congenital  
26 toxic myopathy  
27 ocular muscular dystrophy  
28 moyamoya disease  
29 history of parkinson's disease  
30 steele-richardson-olszewski syndrome  
31 progressive supranuclear ophthalmoplegia  
32 progressive supranuclear palsy  
33 muscular dystrophy  
34 hereditary motor and sensory neuropathy type iii  
35 acute non-paralytic poliomyelitis  
36 alper's disease  
37 disseminated sclerosis  
38 hereditary motor and sensory neuropathy type iv  
39 myopathy in metabolic diseases  
40 brown-sequard syndrome  
41 eulenburg's disease  
42 myopathy due to thyrotoxicosis  
43 polyneuropathy in malignant disease  
44 fibrodysplasia ossificans congenita  
45 athetoid cerebral palsy  
46 [x]cerebral palsy and other paralytic syndromes  
47 nemaline body disease  
48 [x]other specified myopathies  
49 steele - richardson oszewski syndrome  
50 steele richardson olszewsk syn

1 steinert's disease  
2 cerebellar ataxia associated with another disorder  
3 inflammatory disorder of muscle  
4 myopathy or muscular dystrophy nos  
5 myopathy or muscular dystrophy nos  
6 duchenne muscular dystrophy  
7 central nervous system demyelination nos  
8 fxtas - fragile x associated tremor ataxia syndrome  
9 oculopharyngeal muscular dystrophy  
10 erb's muscular dystrophy  
11 pseudobulbar palsy  
12 spastic hemiplegia  
13 flaccid hemiplegia  
14 spielmeyer-vogt (batten) disease  
15 primary lateral sclerosis  
16 myotubular myopathy  
17 centronuclear myopathy  
18 progressive myositis ossificans  
19 adult spinal muscular atrophy  
20 anterior horn cell disease  
21 amyotrophic lateral sclerosis  
22 poikilodermatomyositis  
23 progressive muscular atrophy  
24 marchiafava-bignami disease  
25 becker muscular dystrophy  
26 central demyelination of corpus callosum  
27 becker's disease  
28 spinocerebellar disease  
29 myasthenia gravis  
30 secondary parkinsonism due to other external agents  
31 secondary parkinsonism, unspecified  
32 vanishing white matter disease  
33 axonal sensorimotor neuropathy  
34 management of ms in progressive disability phase  
35 relapsing and remitting multiple sclerosis  
36 mitoch myopath/encephalopath/lactic acidosis/stroke-like episode  
37 peho syndrome  
38 vanishing white matter disease  
39 early onset cerebellar ataxia with hypogonadism  
40 bethlem myopathy  
41 multi-core congenital myopathy  
42 dermatomyositis  
43 hereditary motor and sensory neuropathy  
44 acute poliomyelitis  
45 botulism  
46 facioscapulohumeral muscular dystrophy  
47 brown-sequard syndrome  
48 fragile x associated tremor ataxia syndrome  
49 juvenile dermatomyositis  
50 metachromatic leucodystrophy

1 congenital myopathy  
2 hereditary motor and sensory neuropathy type i  
3 hereditary motor and sensory neuropathy type ii  
4 congenital hereditary muscular dystrophy  
5 emery-dreifuss muscular dystrophy  
6 friedreich's ataxia  
7 spastic diplegic cerebral palsy  
8 spastic quadriplegic cerebral palsy  
9 other cerebral palsy  
10 cerebral palsy nos  
11 charcot-marie-tooth syndrome  
12 neuroferritinopathy  
13 amaurotic familial idiocy  
14 dejerine-sottas disease  
15 gross motor function classification system cerebral palsy  
16 pseudo - hurler's disease  
17 pseudohypertrophic dystrophy  
18 quadriplegia  
19 tetraplegia  
20 cerebral palsy  
21 acute infective polyneuritis  
22 stiff person syndrome  
23 postinfectious polyneuritis  
24 spastic hemiplegic cerebral palsy  
25 lambert-eaton syndrome  
26 pseudo - hurler's disease  
27 poliomyelitis & other non-arthropod-borne viral diseases-cns  
28 paraplegia - congenital  
29 neuroferritinopathy  
30 choreo-athetotic cerebral palsy  
31 choreoathetoid cerebral palsy  
32 bilateral spastic cerebral palsy  
33 paramyotonia congenita (eulenburg's disease)  
34 parkinsonism secondary to drugs  
35 balo's concentric sclerosis  
36 ataxic diplegic cerebral palsy  
37 h/o: poliomyelitis  
38 childhood type dermatomyositis  
39 postnatal infantile hemiplegia  
40 fisher's syndrome  
41 ophthalmoplegia, ataxia, areflexia syndrome  
42 miller-fisher variant of guillain-barre syndrome  
43 fisher syndrome  
44 pigmentary pallidal degeneration  
45 pigmentary pallidal atrophy  
46 o/e - hemiplegia  
47 o/e - paraplegia  
48 o/e - quadriplegia  
49 o/e - diplegia  
50 o/e - parkinsonian tremor

1 o/e - hemiplegic posture  
2 o/e - paraplegic in flexion  
3 o/e - paraplegic in extension  
4 o/e - parkinson flexion posture  
5 o/e - parkinson flexion posture  
6 o/e - ataxic gait  
7 o/e - gait ataxic  
8 o/e - arms ataxic  
9 o/e - legs ataxic  
10 myositis ossificans associated with dermato / polymyositis  
11 parkinsonism caused by drug  
12 stiff-man syndrome  
13 moersch-woltmann syndrome  
14 gamma neuron overactivity syndrome  
15 moersch-woltman syndrome  
16 sma - spinal muscular atrophy  
17 demyelinating disorders of the central nervous system  
18 demyelinating cns disease  
19 demyelinating disease central nervous system (cns)  
20 proximal myotonic myopathy  
21 notification of acute polio  
22 paraplegic-spastic gait  
23 friedreich's ataxia  
24 friedreich's disease  
25 familial ataxia  
26 fa - friedreich ataxia  
27 secondary progressive multiple sclerosis  
28 primary progressive multiple sclerosis  
29 myopathy in hypopituitarism  
30 acute nonparalytic poliomyelitis  
31 anterior acute poliomyelitis specified as nonparalytic  
32 epidemic acute poliomyelitis specified as non paralytic  
33 anterior acute poliomyelitis, nonparalytic  
34 epidemic acute poliomyelitis, non paralytic  
35 ragged red myopathy  
36 other limb-girdle muscular dystrophy  
37 toxic neuromuscular junction disorder  
38 toxic myoneural junction disorder  
39 toxic disorders of the neuromuscular junction  
40 o/e - parkinson posture  
41 shy-drager syndrome  
42 alcoholic myopathic syndrome  
43 alcoholic myositis  
44 ataxia (loss of muscle coordination)  
45 progressive sclerosing poliodystrophy  
46 alpers' disease  
47 gray matter degeneration  
48 spongy glioneuronal dystrophy  
49 poliodystrophy  
50 progressive neuronal degeneration with liver cirrhosis  
51 multiple system atrophy, cerebellar variant

1 multiple system atrophy, parkinson variant  
2 listerial cerebral arteritis  
3 acute paralytic non-bulbar poliomyelitis  
4 acute paralytic poliomyelitis, unspecified  
5 acute paralytic poliomyelitis, vaccine-associated  
6 acute paralytic poliomyelitis, wild virus, imported  
7 acute paralytic poliomyelitis, wild virus, indigenous  
8 acute poliomyelitis nos  
9 gm>2< gangliosidosis, type 2  
10 hexosaminidase a and b deficiency  
11 total hexosaminidase deficiency  
12 [x]acute paralytic poliomyelitis, other and unspecified  
13 [x]acute poliomyelitis, unspecified  
14 ms - multiple sclerosis  
15 ds - disseminated sclerosis  
16 fragile x associated tremor ataxia syndrome  
17 subacute myelo-optic neuropathy  
18 devic syndrome  
19 optic neuromyelitis  
20 smon - subacute myelo-optico-neuropathy  
21 tabetic gait  
22 broadened gait  
23 phytanic acid storage disease  
24 heredopathia atactica polyneuritiformis  
25 refsum syndrome  
26 heredoataxia hemeralopica polyneuritiformis  
27 refsum-thiÃfÃfÃ,Ã©baut disease  
28 hereditary sensory-motor neuropathy, type iv  
29 refsum-thiebaut disease  
30 hereditary motor and sensory neuropathy, type iv  
31 hsmn iv  
32 heredoataxic atactica polyneuritiformis  
33 heredoataxic hemeralopica polyneuritiformis  
34 mitochondrial ocular myopathy  
35 gaucher's disease  
36 coproporphyrria  
37 [x]other gangliosidosis  
38 brown-sÃfÃfÃ,Ã©quard syndrome  
39 progressive supranuclear ophthalmoplegia  
40 psp - progressive supranuclear palsy  
41 subacute sclerosing panencephalitis  
42 dawson's inclusion body encephalitis  
43 poliomyelitis encephalitis  
44 myotonia chondrodystrophica  
45 osteochondromuscular dystrophy  
46 chondrodystrophic myotonia  
47 post polio vaccination encephalitis  
48 leucodystrophy  
49 krabbe's disease  
50 leucodystrophy nos

1 retinal dystrophy in cerebroretinal lipodosis  
2 parkinson's disease nos  
3 other basal ganglia degenerative diseases  
4 parkinsonism with orthostatic hypotension  
5 other basal ganglia degenerative disease nos  
6 dyssynergia cerebellaris myoclonica  
7 primary cerebellar degeneration nos  
8 cerebellar ataxia in diseases ec  
9 cerebellar ataxia due to neoplasia  
10 cerebellar ataxia in disease nos  
11 other spinocerebellar diseases  
12 other spinocerebellar disease nos  
13 spinocerebellar disease nos  
14 unspecified spinal muscular atrophy  
15 spinal muscular atrophy nos  
16 motor neurone disease nos  
17 other anterior horn cell disease  
18 anterior horn cell disease nos  
19 multiple sclerosis of the spinal cord  
20 generalised multiple sclerosis  
21 exacerbation of multiple sclerosis  
22 multiple sclerosis nos  
23 other central nervous system demyelinating diseases  
24 other specified central nervous system demyelinating disease  
25 other specified central nervous system demyelination nos  
26 central nervous system demyelination nos  
27 hemiplegia nos  
28 congenital paraplegia  
29 congenital diplegia nos  
30 infantile hemiplegia nos  
31 other congenital cerebral palsy  
32 ataxic infantile cerebral palsy  
33 other infantile cerebral palsy nos  
34 congenital cerebral palsy nos  
35 flaccid tetraplegia  
36 spastic tetraplegia  
37 flaccid paraplegia  
38 spastic paraplegia  
39 peroneal muscular atrophy nos  
40 neuropathy in association with hereditary ataxia  
41 acute infective polyneuritis nos  
42 infantile necrotizing encephalomyelopathy  
43 subacute necrotizing encephalopathy  
44 subacute necrotizing encephalomyelopathy  
45 subacute necrotising encephalomyelopathy  
46 subacute necrotising encephalopathy  
47 infantile necrotising encephalomyelopathy  
48 snem - subacute necrotising encephalomyelopathy  
49 snem - subacute necrotizing encephalomyelopathy  
50 leigh syndrome

1 leigh disease  
2 leighs disease  
3 polyneuropathy in porphyria  
4 juvenile or adult myasthenia gravis  
5 myasthenia gravis nos  
6 myasthenic syndrome due to disease ec  
7 myasthenic syndrome due to other malignancy  
8 myasthenic syndrome due to hypothyroidism  
9 myasthenic syndrome due to pernicious anaemia  
10 myasthenic syndrome due to thyrotoxicosis  
11 myasthenic syndrome due to disease nos  
12 congenital and developmental myasthenia  
13 myoneural disorder nos  
14 muscular dystrophies and other myopathies  
15 benign congenital myopathy  
16 congenital hereditary muscular dystrophy nos  
17 hereditary progressive muscular dystrophy  
18 pelvic muscular dystrophy  
19 hereditary progressive muscular dystrophy nos  
20 infantile myotonia  
21 other specified myotonic disorder  
22 myotonic disorder nos  
23 striatonigral atrophy  
24 snd - striatonigral degeneration  
25 myopathy due to endocrine disease ec  
26 myopathy due to endocrine disease nos  
27 symptomatic inflammatory myopathy in disease ec  
28 myopathy due to disseminated lupus erythematosus  
29 myopathy due to polyarteritis nodosa  
30 myopathy due to rheumatoid arthritis  
31 myopathy due to sarcoidosis  
32 myopathy due to scleroderma  
33 myopathy due to sjogren's disease  
34 symptomatic inflammatory myopathy in disease nos  
35 proximal myopathy  
36 other myopathies and muscular dystrophies  
37 myopathy or muscular dystrophy nos  
38 multiple sclerosis review  
39 [x]other hereditary ataxias  
40 [x]other inherited spinal muscular atrophy  
41 [x]other spinal muscular atrophies and related syndromes  
42 [x]paraneoplastic neuromyopathy and neuropathy  
43 [x]other drug-induced secondary parkinsonism  
44 [x]other secondary parkinsonism  
45 [x]parkinsonism in diseases classified elsewhere  
46 [x]secondary parkinsonism, unspecified  
47 [x]secondary parkinsonism due to other external agents  
48 [x]demyelinating diseases of the central nervous system  
49 [x]other specified acute disseminated demyelination  
50 [x]acute disseminated demyelination, unspecified

1 [x]diseases of myoneural junction and muscle  
2 [x]other specified myoneural disorders  
3 [x]other primary disorders of muscles  
4 [x]other specified myopathies  
5 [x]myopathy in endocrine diseases classified elsewhere  
6 [x]myopathy in metabolic diseases classified elsewhere  
7 [x]myopathy in other diseases classified elsewhere  
8 [x]mitochondrial myopathy, not elsewhere classified  
9 [x]inflammatory myopathy, not elsewhere classified  
10 [x]cerebral palsy and other paralytic syndromes  
11 [x]other infantile cerebral palsy  
12 multiple sclerosis care plan agreed  
13 post poliomyelitis syndrome  
14 postpolio muscular atrophy  
15 post-polio progressive muscular atrophy  
16 progressive muscular atrophy following poliomyelitis  
17 dissection of cerebral arteries, nonruptured  
18 neuromyositis  
19 pm - polymyositis  
20 [x]cerebral arteritis in infectious and parasitic diseases  
21 [d]post polio exhaustion  
22 lung disease with polymyositis  
23 parkinsonism  
24 disorders presenting primarily with parkinsonism  
25 myopathy in addison's disease  
26 myopathy in addison disease  
27 motor neuron disease  
28 mnd - motor neurone disease  
29 other specific muscle disorder  
30 other specific muscle disorder nos  
31 osteopathy from poliomyelitis  
32 poliomyelitis osteopathy of unspecified site  
33 poliomyelitis osteopathy of the shoulder region  
34 poliomyelitis osteopathy of the upper arm  
35 poliomyelitis osteopathy of the forearm  
36 poliomyelitis osteopathy of the hand  
37 poliomyelitis osteopathy of the pelvic region and thigh  
38 poliomyelitis osteopathy of the lower leg  
39 poliomyelitis osteopathy of the ankle and foot  
40 poliomyelitis osteopathy of other specified sites  
41 poliomyelitis osteopathy of multiple sites  
42 poliomyelitis osteopathy nos  
43 [x]other dermatomyositis  
44 [x]dermatopolymyositis, unspecified  
45 [x]other specified disorders of muscle  
46 strumpell-lorrain disease  
47 familial spastic paraplegia syndrome  
48 hsp - hereditary spastic paraplegia  
49 strumpell disease  
50 spastic congenital paraplegia



1 juvenile myopathy, encephalopathy, lactic acidosis and stroke  
2 melas - mitochondrial myopathy, encephalopathy, lactic acidosis and stroke-like episodes  
3 mitochondrial myopathy, encephalopathy, lactic acidosis and stroke-like episodes  
4 multiple sclerosis multidisciplinary review  
5 guillain-barré syndrome  
6 landry-guillain-barré syndrome  
7 ascending paralysis  
8 landry-guillain-barre syndrome  
9 acute inflammatory demyelinating polyradiculoneuropathy  
10 acute idiopathic polyradiculoneuritis  
11 acute idiopathic polyneuritis  
12 acute post-infective radiculoneuropathy  
13 acute inflammatory neuropathy  
14 guillain barre syndrome  
15 eulenburg syndrome  
16 eulenburg disease  
17 [d]ataxic gait  
18 [d]ataxia nos  
19 paroxysmal non-kinesigenic dyskinesia  
20 central core myopathy  
21 corticostriatal spinal degeneration  
22 roussy-lãvy syndrome  
23 hereditary ataxia-muscular atrophy syndrome  
24 progressive external ophthalmoplegia  
25 graefe's disease  
26 chronic progressive ophthalmoplegia  
27 cpeo - chronic progressive external ophthalmoplegia  
28 peo - progressive external ophthalmoplegia  
29 ataxia with lactic acidosis i  
30 ataxia with lactic acidosis  
31 marie cerebellar ataxia  
32 quadriplegic cerebral palsy  
33 tetraplegic cerebral palsy  
34 cerebral palsy with spastic tetraplegia  
35 tetraplegic spastic cerebral palsy  
36 quadriplegic spastic cerebral palsy  
37 paralysis agitans  
38 shaking palsy  
39 idiopathic parkinson's disease  
40 parkinson disease  
41 pd - parkinson's disease  
42 parkinsons disease  
43 primary parkinsonism  
44 idiopathic parkinsonism  
45 hemiplegia (paralysis on one side)  
46 ganglioside accumulation in nervous tissue lysosomes  
47 ganglioside storage disease  
48 postencephalitic parkinsonism  
49 myopathy in cushing's disease  
50 myopathy in cushing disease

1 upper diplegia  
2 kugelberg-welander disease  
3 familial spinal muscular atrophy  
4 spinal muscular atrophy, type iii  
5 sma3  
6 sma type iii  
7 spinal muscular atrophy type iii  
8 bulbar paralysis  
9 bulbar palsy  
10 pbp - progressive bulbar palsy  
11 monoplegic cerebral palsy  
12 myasthenic syndrome  
13 lambert-eaton myasthenic syndrome  
14 lems - lambert-eaton myasthenic syndrome  
15 congenital myotonia, autosomal dominant form  
16 thomsen's disease  
17 thomsen myotonia congenita  
18 endocrine myopathy  
19 muscle disease related to endocrine disease  
20 muscle disorders associated with endocrine disease  
21 diplegic cerebral palsy  
22 spastic diplegic cerebral palsy  
23 variegate porphyria  
24 south african porphyria  
25 south african genetic porphyria  
26 protocoproporphyrinuria  
27 dean-barnes syndrome  
28 mixed porphyria  
29 protoporphyrinogen oxidase deficiency  
30 vp - variegate porphyria  
31 porphyria variegata  
32 sphingomyelin/cholesterol lipidosis  
33 neuronal cholesterol lipidosis  
34 sphingomyelinase deficiency  
35 sphingomyelin lipidosis  
36 early onset cerebellar ataxia with hypogonadism  
37 kennedy syndrome  
38 vascular parkinsonism  
39 multiple system atrophy  
40 subacute necrotizing myelitis  
41 concentric sclerosis  
42 distal muscular dystrophy  
43 axonal sensorimotor neuropathy  
44 cerebral amyloid angiopathy  
45 infantile cerebral palsy  
46 spastic cerebral palsy  
47 dyskinetic cerebral palsy  
48 paralysis of both lower limbs  
49 lower paraplegia  
50 paraplegia (complete or partial paralysis of legs)

1 late effects of acute poliomyelitis  
2 posterolateral sclerosis  
3 vitamin b>12< deficiency disease of spinal cord  
4 putnam-dana syndrome  
5 lichtheim's disease  
6 neuromyelopathy due to vitamin b12 deficiency  
7 sacd - subacute combined degeneration  
8 vitamin b>12< deficiency neuropathy  
9 secondary myopathy  
10 batten-mayou disease  
11 spielmeyer-vogt disease  
12 amaurotic idiocy, juvenile type  
13 cerebral lipidosis, myoclonic variant  
14 batten-spielmeier-vogt disease  
15 cerebral lipidosis myoclonic variant  
16 batten-mayou syndrome  
17 amaurotic idiocy juvenile type  
18 spielmeyer-vogt type neuronal ceroid lipofuscinosis  
19 myasthenia angiosclerotica  
20 cockayne syndrome  
21 werdnig-hoffmann disease  
22 progressive muscular atrophy of infancy  
23 spinal muscular atrophy, type i  
24 spinal muscular atrophy type i  
25 whd - werdnig-hoffmann disease  
26 acute paralytic poliomyelitis, bulbar  
27 acute infantile paralysis  
28 acute anterior poliomyelitis  
29 acute anterior bulbar polioencephalomyelitis  
30 sudanophilic leukodystrophy  
31 lipofuscinosis nec  
32 mucopolipidosis iii  
33 pseudo-hurler disease  
34 pseudo-hurler's disease  
35 dermatopolymyositis in neoplastic disease  
36 hauptmann-thannhauser muscular dystrophy  
37 familial hypokalaemic periodic paralysis  
38 drug-induced myopathy  
39 kiloh-nevin syndrome  
40 ocular myopathy  
41 olivopontocerebellar degeneration  
42 thyrotoxic myopathy  
43 ataxia-telangiectasia syndrome  
44 louis-bar syndrome  
45 ataxia telangiectasia syndrome  
46 dissociative ataxia  
47 carcinomatous myopathic syndrome  
48 myopathy associated with malignant disease  
49 md - muscular dystrophy  
50 progressive muscular dystrophy

1  
2 pmd - progressive muscular dystrophy  
3 dentato-rubral atrophy syndrome  
4 hunt's disease  
5 dentate cerebellar ataxia  
6 [x]cerebral arteritis in other diseases ce  
7 nemaline myopathy  
8 rod myopathy  
9 rod-body myopathy  
10 pseudohypertrophic muscular dystrophy  
11 dmd - duchenne muscular dystrophy  
12 oculopharyngeal dystrophy  
13 carcinomatous peripheral neuropathy  
14 carcinomatous neuropathy  
15 paraneoplastic polyneuropathy  
16 [x]dermato(poly)myositis in neoplastic disease ce  
17 steinert myotonic dystrophy syndrome  
18 steinert syndrome  
19 dystrophia myotonica  
20 dm - dystrophia myotonica  
21 myotonia dystrophica  
22 erb muscular dystrophy  
23 titubant ataxic gait  
24 myoneural disorders  
25 mÃ¶nchmeyer disease  
26 diffuse progressive ossifying polymyositis  
27 fibrodysplasia ossificans progressiva  
28 fop - fibrodysplasia ossificans progressiva  
29 myositis ossificans progressiva  
30 familial hypokalemic periodic paralysis  
31 hypokalemic periodic paralysis  
32 hypokalaemic periodic paralysis  
33 periodic paralysis i  
34 cerebellar ataxia (loss of muscle coordination)  
35 adult spinal muscular atrophy  
36 generalized spinal muscular atrophy of late onset  
37 generalised spinal muscular atrophy of late onset  
38 adult onset spinal muscular atrophy  
39 bulbar motor neuron disease  
40 lou gehrig's disease  
41 als - amyotrophic lateral sclerosis  
42 hypothyroid myopathy  
43 myxedema myopathy  
44 myxoedema myopathy  
45 amyotrophy  
46 muscular atrophy  
47 duchenne-aran muscular atrophy  
48 pure progressive muscular atrophy  
49 pma - progressive muscular atrophy  
50 primary cerebellar degeneration  
51 erb-goldflam disease

1 mg - myasthenia gravis  
 2 [x]myasthenic syndromes in endocrine diseases ce  
 3 [x]myasthenic syndromes/other diseases classified elsewhere  
 4 [x]myopathy/infectious+parasitic diseases ce  
 5 cerebellar ataxia nos  
 6 [x]myositis in protozoal and parasitic infections ce  
 7 other specific myoneural disorder  
 8 other specified hereditary progressive muscular dystrophy  
 9 familial periodic paralysis  
 10 lipofuscinosis nos  
 11 sandhoff disease  
 12 limb-girdle muscular dystrophy  
 13 leyden-mãfÃfÃ,Ã¶bius muscular dystrophy  
 14 o/e-festination-parkinson gait  
 15 o/e - festination  
 16 o/e - parkinson gait  
 17 [x]other disorders of muscle in diseases ce  
 18 congenital cerebral palsy  
 19 congenital spastic cerebral palsy  
 20 congenital quadriplegia  
 21 congenital diplegia  
 22 o/e - ataxia  
 23 [x]other myasthenic syndromes in neoplastic disease ce  
 24 multiple sclerosis  
 25 [x]other specified degenerative diseases/the basal ganglia  
 26 [x]other specified demyelinating diseases/the CNS  
 27 right hemiplegia  
 28 left hemiplegia  
 29 late effects of poliomyelitis  
 30 sequelae of poliomyelitis  
 31 sequela of infection caused by human poliovirus  
 32 neuromyelitis optica  
 33 devic's disease  
 34 dÃfÃfÃ,Ã©jÃfÃfÃ,Ã©rine-sottas disease  
 35 hereditary sensory-motor neuropathy, type iii  
 36 hereditary hypertrophic neuropathy  
 37 progressive hypertrophic interstitial neuropathy  
 38 hereditary motor and sensory neuropathy, type iii  
 39 hsmn iii  
 40 hmsn iii  
 41 hypertrophic hereditary neuropathy  
 42 hypertrophic demyelinative neuropathy of infancy  
 43 emd - emery-dreifuss muscular dystrophy  
 44 benign scapulooperoneal muscular dystrophy with early contractures  
 45 [x]polyneuropathy in neoplastic disease ce  
 46 refsum's disease  
 47 [x]sequelae of poliomyelitis  
 48 [x]subacute combined degeneration/spinal cord in diseases ce  
 49 [x]systemic atrophies primarily affecting the CNS  
 50 [x]systemic atrophy affecting the CNS in other diseases ce

1  
2 cp - cerebral palsy  
3 cerebral palsy (cp)  
4 inflammatory myopathy  
5 myopathic disease  
6 myopathy  
7 porphyric polyneuropathy  
8 neuromyotonia  
9  
10 roussy-levy syndrome  
11 cerebral palsy, not congenital or infantile, acute  
12 history of poliomyelitis  
13 acute disseminated demyelination, unspecified  
14 on examination - hemiplegia  
15 on examination - paraplegia  
16 on examination - quadriplegia  
17 o/e - tetraplegia  
18 on examination - tetraplegia  
19 on examination - diplegia  
20 on examination - parkinsonian tremor  
21 on examination - hemiplegic posture  
22 on examination - paraplegic in flexion  
23 on examination - paraplegic in extension  
24 on examination - parkinson flexion posture  
25 on examination - gait ataxic  
26 on examination - arms ataxic  
27 on examination - legs ataxic  
28 spinal paralytic poliomyelitis  
29 cerebral arteritis  
30 gaucher's disease  
31 cerebroside lipidosis syndrome  
32 glucocerebrosidase deficiency  
33 kerafin histiocytosis  
34 gaucher splenomegaly  
35 kerafin lipoidosis  
36 glucocerebrosidosis  
37 gaucher syndrome  
38 glucosylceramidase deficiency  
39 glucosylceramide beta-glucosidase deficiency  
40 alcoholic myopathy  
41 sspe - subacute sclerosing panencephalitis  
42 dawson's inclusion body encephalitis  
43 leukodystrophy  
44 galactosylceramide beta-galactosidase deficiency  
45 krabbe's leukodystrophy  
46 globoid cell leucodystrophy  
47 krabbe leucodystrophy  
48 gcl - globoid cell leucodystrophy  
49 krabbe disease  
50 galactocerebroside beta-galactosidase deficiency  
51 diffuse globoid cell cerebral sclerosis  
52 b variant hexosaminidase a deficiency

1 myxoedema cerebellar degeneration  
2 myxedema cerebellar degeneration  
3 paraneoplastic cerebellar degeneration  
4 multiple sclerosis of the brainstem  
5 brain stem multiple sclerosis  
6 generalized multiple sclerosis  
7 multiple sclerosis (ms) exacerbation  
8 hypotonic cerebral palsy  
9 spastic quadriplegia  
10 post-infectious polyneuritis  
11 myasthenic syndrome due to another disorder  
12 myasthenic syndrome due to pernicious anemia  
13 distal muscular dystrophy with juvenile onset  
14 symptomatic inflammatory myopathy associated with another disorder  
15 amyloid myopathy  
16 sarcoid myopathy  
17 myopathy due to systemic sclerosis  
18 myopathy due to sjögren's disease  
19 myopathy due to sjögren disease  
20 myopathy due to sjogrens disease  
21 cerebellar ataxia due to alcoholism  
22 lung disease co-occurrent with polymyositis  
23 polymyositis with pulmonary involvement  
24 miller-fisher syndrome  
25 cerebral ataxia  
26 poliomyelitis osteopathy of the pelvic region and/or thigh  
27 poliomyelitis osteopathy of the ankle and/or foot  
28 progressive supranuclear ophthalmoplegia  
29 progressive supranuclear palsy  
30 steele-richardson-olszewski syndrome  
31 neuralgic amyotrophy  
32 motor neurone disease  
33 tropical spastic paraplegia  
34 leigh's disease  
35 striatonigral degeneration  
36 tabes dorsalis - neurosyphilis  
37 syphilitic posterior spinal sclerosis  
38 ataxia-telangiectasia  
39 athetoid cerebral palsy  
40 thomsen's disease  
41 subacute combined degeneration  
42 oppenheim's amyotonia  
43 acute paralytic bulbar poliomyelitis  
44 system disorder of the nervous system  
45 bulbospinal neuronopathy  
46 x-linked bulbospinal atrophy  
47 bulbospinal muscular atrophy  
48 secondary parkinson's disease  
49 secondary parkinson disease  
50 msa - multiple system atrophy

1  
2 autosomal dominant late onset basal ganglia degeneration  
3 subacute necrotizing myelitis  
4 balo concentric sclerosis  
5 balo's concentric sclerosis  
6 balos concentric sclerosis  
7 landau-kleffner syndrome  
8 caa - cerebral amyloid angiopathy  
9 congophilic angiopathy  
10 periventricular leukoencephalopathy  
11 pyramidal cerebral palsy  
12 congenital spastic paralysis  
13 spastic infantile paralysis  
14 little's disease  
15 infantile spastic cerebral palsy  
16 batten's disease of retina  
17 dermatomyositis with malignant disease  
18 postpolio syndrome  
19 polymyositis  
20 combined disorder of muscle and peripheral nerve  
21 neuromuscular disorder  
22 carotico-cavernous sinus fistula  
23 cerebellar ataxia due to myxoedema  
24 cerebral lipidoses  
25 cerebral palsy with spastic diplegia  
26 myoplegic dystrophy  
27 familial recurrent paralysis  
28 familial myoplegia  
29 cavarre disease  
30 periodic myotonia  
31 on examination - festination-parkinson gait  
32 x-linked bulbo-spinal atrophy  
33 idiopathic progressive polyneuropathy  
34 congenital tetraplegia  
35 on examination - ataxia  
36 It - left hemiplegia  
37 congenital non-progressive ataxia  
38 ataxic cerebral palsy  
39 cockayne's syndrome  
40 congenital nonprogressive ataxia  
41 carotid cavernous fistula  
42 ccf - carotid cavernous fistula  
43 continuous muscle fiber activity  
44 continuous muscle fibre activity  
45 werdnig - hoffmann disease  
46 tabes dorsalis  
47 duchenne's disease  
48 hallervorden-spatz disease  
49 dermatopolymyositis, unspecified  
50 distal (gower's) muscular dystrophy  
51 distal dystrophy



1 drug induced parkinsonism  
2 duchenne aran muscular atrophy  
3 sanger-brown cerebellar ataxia  
4 dystrophia myotonica (steinert's disease)  
5 encephalitis due to poliomyelitis  
6 encephalitis due to subacute sclerosing panencephalitis  
7 benign multiple sclerosis  
8 malignant multiple sclerosis  
9 marchiafava disease  
10 bmd - becker muscular dystrophy  
11 becker's muscular dystrophy  
12 benign duchenne muscular dystrophy  
13 syphilitic parkinsonism  
14 wagner-unverricht syndrome  
15 polymyositis with skin involvement  
16 dm - dermatomyositis  
17 metachromatic leukodystrophy  
18 sulphatide lipidosis  
19 sulfatide lipidosis  
20 mld  
21 metachromatic leukoencephaly  
22 van bogaert-nijssen disease  
23 familial progressive cerebral sclerosis  
24 mld - metachromatic leucodystrophy  
25 charcot-marie-tooth disease, type i  
26 hereditary sensory-motor neuropathy, type i  
27 peroneal muscular atrophy of demyelinating type  
28 inherited dominant hypertrophic neuropathy  
29 charcot-marie-tooth disease of demyelinating type  
30 hsmn, type i  
31 charcot marie tooth disease, type 1  
32 hereditary sensory and motor neuropathy  
33 hereditary sensory-motor neuropathy  
34 hsmn  
35 hmsn  
36 hmsn - hereditary motor and sensory neuropathy  
37 hsmn - hereditary sensory and motor neuropathy  
38 hereditary sensorimotor neuropathy  
39 polio  
40 pm - poliomyelitis  
41 poliomyelitis  
42 charcot-marie-tooth disease, type ii  
43 inherited neuronal peroneal muscular atrophy  
44 peroneal muscular atrophy of neuronal type  
45 charcot marie tooth disease, type 2  
46 extraocular muscle myopathy  
47 extrapyramidal disease excluding parkinson's disease  
48 lame sickness  
49 infection due to clostridium botulinum  
50 infection caused by clostridium botulinum  
51  
52  
53  
54  
55  
56  
57  
58  
59  
60

1 facioscapulohumeral atrophy  
2 fsh - facioscapulohumeral muscular dystrophy  
3 landouzy-déjerine muscular dystrophy  
4 landouzy-dejerine muscular dystrophy  
5 fshd - facioscapulohumeral muscular dystrophy  
6 fmd - facioscapulohumeral muscular dystrophy  
7 fascioscapulohumeral muscular dystrophy  
8 hereditary spastic paraplegia  
9 myopathy due to addison's disease  
10 myopathy due to amyloid  
11 myopathy due to cushing's syndrome  
12 myopathy due to hypopituitarism  
13 myopathy due to malignant disease  
14 myopathy due to myxoedema  
15 myotonia congenita (thomsen's disease)  
16 myotonic chondrodysplasia  
17 myotonic disorders  
18 guillain-barre syndrome  
19 myasthenic syndrome due to botulism  
20 polymyositis ossificans  
21 multiple sclerosis of the brain stem  
22 mucopolidosis type iii  
23 management of multiple sclerosis in onset phase  
24 management of multiple sclerosis in early disease phase  
25 management of multiple sclerosis in stable disability phase  
26 management of multiple sclerosis in palliative phase  
27 mitochondrial myopathy, not elsewhere classified  
28 multiple sclerosis (ms) secondary progressive  
29 multiple sclerosis (ms) relapsing remitting  
30 multiple sclerosis (ms) primary progressive  
31 congenital nonprogressive myopathy with moebius and robin sequences  
32 massive muscular calcification associated with paraplegia  
33 central core disease  
34 congenital hemiplegia  
35 multiple system atrophy, parkinson's variant  
36 corticostriatal-spinal degeneration  
37 louis - bar syndrome  
38 fxtas - fragile x associated tremor ataxia syndrome  
39 locomotor ataxia  
40 little's disease  
41 kugelberg - welander disease  
42 flaccid infantile cerebral palsy  
43 gmfc (gross motor function classification system) for cerebral palsy  
44 progressive external ophthalmoplegia  
45 human t-cell lymphotropic virus 1-associated myelopathy  
46 htlv-i-associated myelopathy  
47 tropical spastic paraparesis  
48 myelopathy caused by human t-lymphotropic virus 1  
49 myotonic dystrophy type 2  
50 benign autosomal dominant myopathy

1 inflammatory myopathy, not elsewhere classified  
2 marie's cerebellar ataxia  
3 hereditary cerebellar ataxia  
4 parkinson's disease  
5 paralysis agitans  
6 history of parkinson disease  
7  
8  
9 scpe (surveillance of cerebral palsy in europe) predominant pattern classification a - maldevelopment  
10 scpe (surveillance of cerebral palsy in europe) predominant pattern classification b - predominant white matter  
11 scpe (surveillance of cerebral palsy in europe) predominant pattern classification c - predominant grey matter  
12 scpe (surveillance of cerebral palsy in europe) predominant pattern classification d - unspecified  
13 scpe (surveillance of cerebral palsy in europe) predominant pattern classification a.1.1 - disorder of proliferative  
14 scpe (surveillance of cerebral palsy in europe) predominant pattern classification a.1.2 - disorder of migration  
15 scpe (surveillance of cerebral palsy in europe) predominant pattern classification a.1.3 - disorder of organisational  
16 scpe (surveillance of cerebral palsy in europe) predominant pattern classification a.2 - unspecified maldevelopment  
17 scpe (surveillance of cerebral palsy in europe) predominant pattern classification b.1 - periventricular leucoma  
18 scpe (surveillance of cerebral palsy in europe) predominant pattern classification b.2 - sequelae of intraventricular  
19 scpe (surveillance of cerebral palsy in europe) predominant pattern classification b.3 - combination of periventricular  
20 scpe (surveillance of cerebral palsy in europe) predominant pattern classification e - normal  
21 scpe (surveillance of cerebral palsy in europe) predominant pattern classification c.1 - basal ganglia and thalamic  
22 scpe (surveillance of cerebral palsy in europe) predominant pattern classification c.2 - parasagittal lesions  
23 scpe (surveillance of cerebral palsy in europe) predominant pattern classification c.3 - infarct of the middle cerebral  
24  
25 degenerative disease of basal ganglia  
26 peroneal muscular atrophy  
27 charcot-marie-tooth disease  
28 hemiplegia  
29 gangliosidosis  
30 right hemiplegia  
31 left hemiplegia  
32 secondary parkinsonism - drugs  
33 other myoneural disorders  
34 myopathy nos  
35 diplegia of upper limbs  
36 juvenile spinal muscular atrophy  
37 progressive bulbar palsy  
38 [rfc] multiple sclerosis  
39 [rfc] motor neurone disease  
40 [rfc] parkinson's disease  
41 [rfc] paraplegias  
42 [rfc] cerebral palsy  
43 [rfc] cerebral palsy  
44 [rfc] multiple sclerosis  
45 [rfc] motor neurone disease  
46 [rfc] parkinson's disease  
47 eaton-lambert syndrome  
48 protocoproporphyrinuria  
49 stiff-man syndrome  
50 spinal muscular atrophy  
51 multiple sclerosis - personal health plan  
52 multiple sclerosis - multidisciplinary review  
53 multiple sclerosis - review

- 1
- 2 multiple sclerosis - primary progressive
- 3 multiple sclerosis - secondary progressive
- 4 multiple sclerosis - relapsing remitting
- 5 toxic myoneural disorder
- 6
- 7
- 8
- 9
- 10
- 11
- 12
- 13
- 14
- 15
- 16
- 17
- 18
- 19
- 20
- 21
- 22
- 23
- 24
- 25
- 26
- 27
- 28
- 29
- 30
- 31
- 32
- 33
- 34
- 35
- 36
- 37
- 38
- 39
- 40
- 41
- 42
- 43
- 44
- 45
- 46
- 47
- 48
- 49
- 50
- 51
- 52
- 53
- 54
- 55
- 56
- 57
- 58
- 59
- 60

For peer review only

1  
2  
3  
4  
5  
6  
7  
8  
9  
10  
11  
12  
13  
14  
15  
16  
17  
18  
19  
20  
21  
22  
23  
24  
25  
26  
27  
28  
29  
30  
31  
32  
33  
34  
35  
36  
37  
38  
39  
40  
41  
42  
43  
44  
45  
46  
47  
48  
49  
50  
51  
52  
53  
54  
55  
56  
57  
58  
59  
60

For peer review only

1  
2  
3  
4  
5  
6  
7  
8  
9  
10  
11  
12  
13  
14  
15  
16  
17  
18  
19  
20  
21  
22  
23  
24  
25  
26  
27  
28  
29  
30  
31  
32  
33  
34  
35  
36  
37  
38  
39  
40  
41  
42  
43  
44  
45  
46  
47  
48  
49  
50  
51  
52  
53  
54  
55  
56  
57  
58  
59  
60

For peer review only

1  
2  
3  
4  
5  
6  
7  
8  
9  
10  
11  
12  
13  
14  
15  
16  
17  
18  
19  
20  
21  
22  
23  
24  
25  
26  
27  
28  
29  
30  
31  
32  
33  
34  
35  
36  
37  
38  
39  
40  
41  
42  
43  
44  
45  
46  
47  
48  
49  
50  
51  
52  
53  
54  
55  
56  
57  
58  
59  
60

For peer review only

1  
2  
3  
4  
5  
6  
7  
8  
9  
10  
11  
12  
13  
14  
15  
16  
17  
18  
19  
20  
21  
22  
23  
24  
25  
26  
27  
28  
29  
30  
31  
32  
33  
34  
35  
36  
37  
38  
39  
40  
41  
42  
43  
44  
45  
46  
47  
48  
49  
50  
51  
52  
53  
54  
55  
56  
57  
58  
59  
60

For peer review only



1  
2  
3  
4  
5  
6  
7  
8  
9  
10  
11  
12  
13  
14  
15  
16  
17  
18  
19  
20  
21  
22  
23  
24  
25  
26  
27  
28  
29  
30  
31  
32  
33  
34  
35  
36  
37  
38  
39  
40  
41  
42  
43  
44  
45  
46  
47  
48  
49  
50  
51  
52  
53  
54  
55  
56  
57  
58  
59  
60

For peer review only

1  
2  
3  
4  
5  
6  
7  
8  
9  
10  
11  
12  
13  
14  
15  
16  
17  
18  
19  
20  
21  
22  
23  
24  
25  
26  
27  
28  
29  
30  
31  
32  
33  
34  
35  
36  
37  
38  
39  
40  
41  
42  
43  
44  
45  
46  
47  
48  
49  
50  
51  
52  
53  
54  
55  
56  
57  
58  
59  
60

For peer review only

1  
2  
3  
4  
5  
6  
7  
8  
9  
10  
11  
12  
13  
14  
15  
16  
17  
18  
19  
20  
21  
22  
23  
24  
25  
26  
27  
28  
29  
30  
31  
32  
33  
34  
35  
36  
37  
38  
39  
40  
41  
42  
43  
44  
45  
46  
47  
48  
49  
50  
51  
52  
53  
54  
55  
56  
57  
58  
59  
60

For peer review only

1  
2  
3  
4  
5  
6  
7  
8  
9  
10  
11  
12  
13  
14  
15  
16  
17  
18  
19  
20  
21  
22  
23  
24  
25  
26  
27  
28  
29  
30  
31  
32  
33  
34  
35  
36  
37  
38  
39  
40  
41  
42  
43  
44  
45  
46  
47  
48  
49  
50  
51  
52  
53  
54  
55  
56  
57  
58  
59  
60

For peer review only

1  
2  
3  
4  
5  
6  
7  
8  
9  
10  
11  
12  
13  
14  
15  
16  
17  
18  
19  
20  
21  
22  
23  
24  
25  
26  
27  
28  
29  
30  
31  
32  
33  
34  
35  
36  
37  
38  
39  
40  
41  
42  
43  
44  
45  
46  
47  
48  
49  
50  
51  
52  
53  
54  
55  
56  
57  
58  
59  
60

For peer review only

1  
2  
3  
4  
5  
6  
7  
8  
9  
10  
11  
12  
13  
14  
15  
16  
17  
18  
19  
20  
21  
22  
23  
24  
25  
26  
27  
28  
29  
30  
31  
32  
33  
34  
35  
36  
37  
38  
39  
40  
41  
42  
43  
44  
45  
46  
47  
48  
49  
50  
51  
52  
53  
54  
55  
56  
57  
58  
59  
60

For peer review only

1  
2  
3  
4  
5  
6  
7  
8  
9  
10  
11  
12  
13  
14  
15  
16  
17  
18  
19  
20  
21  
22  
23  
24  
25  
26  
27  
28  
29  
30  
31  
32  
33  
34  
35  
36  
37  
38  
39  
40  
41  
42  
43  
44  
45  
46  
47  
48  
49  
50  
51  
52  
53  
54  
55  
56  
57  
58  
59  
60

For peer review only

1  
2  
3  
4  
5  
6  
7  
8  
9  
10  
11  
12  
13  
14  
15  
16  
17  
18  
19  
20  
21  
22  
23  
24  
25  
26  
27  
28  
29  
30  
31  
32  
33  
34  
35  
36  
37  
38  
39  
40  
41  
42  
43  
44  
45  
46  
47  
48  
49  
50  
51  
52  
53  
54  
55  
56  
57  
58  
59  
60

For peer review only



1  
2  
3  
4  
5  
6  
7  
8  
9  
10  
11  
12  
13  
14  
15  
16  
17  
18  
19  
20  
21  
22  
23  
24  
25  
26  
27  
28  
29  
30  
31  
32  
33  
34  
35  
36  
37  
38  
39  
40  
41  
42  
43  
44  
45  
46  
47  
48  
49  
50  
51  
52  
53  
54  
55  
56  
57  
58  
59  
60

For peer review only

1  
2  
3  
4  
5  
6  
7  
8  
9  
10  
11  
12  
13  
14  
15  
16  
17  
18  
19  
20  
21  
22  
23  
24  
25  
26  
27  
28  
29  
30  
31  
32  
33  
34  
35  
36  
37  
38  
39  
40  
41  
42  
43  
44  
45  
46  
47  
48  
49  
50  
51  
52  
53  
54  
55  
56  
57  
58  
59  
60

For peer review only

1  
2  
3  
4  
5  
6  
7  
8  
9  
10  
11  
12  
13  
14  
15  
16  
17  
18  
19  
20  
21  
22  
23  
24  
25  
26  
27  
28  
29  
30  
31  
32  
33  
34  
35  
36  
37  
38  
39  
40  
41  
42  
43  
44  
45  
46  
47  
48  
49  
50  
51  
52  
53  
54  
55  
56  
57  
58  
59  
60

For peer review only

1  
2  
3  
4  
5  
6  
7  
8  
9  
10  
11  
12  
13  
14  
15  
16  
17  
18  
19  
20  
21  
22  
23  
24  
25  
26  
27  
28  
29  
30  
31  
32  
33  
34  
35  
36  
37  
38  
39  
40  
41  
42  
43  
44  
45  
46  
47  
48  
49  
50  
51  
52  
53  
54  
55  
56  
57  
58  
59  
60

For peer review only

1  
2  
3  
4  
5  
6  
7  
8  
9  
10  
11  
12  
13  
14  
15  
16  
17  
18  
19  
20  
21  
22  
23  
24  
25  
26  
27  
28  
29  
30  
31  
32  
33  
34  
35  
36  
37  
38  
39  
40  
41  
42  
43  
44  
45  
46  
47  
48  
49  
50  
51  
52  
53  
54  
55  
56  
57  
58  
59  
60

For peer review only

1  
2  
3  
4  
5  
6  
7  
8  
9  
10  
11  
12  
13  
14  
15  
16  
17  
18  
19  
20  
21  
22  
23  
24  
25  
26  
27  
28  
29  
30  
31  
32  
33  
34  
35  
36  
37  
38  
39  
40  
41  
42  
43  
44  
45  
46  
47  
48  
49  
50  
51  
52  
53  
54  
55  
56  
57  
58  
59  
60

For peer review only

1  
2  
3  
4  
5  
6  
7  
8  
9  
10  
11  
12  
13  
14  
15  
16  
17  
18  
19  
20  
21  
22  
23  
24  
25  
26  
27  
28  
29  
30  
31  
32  
33  
34  
35  
36  
37  
38  
39  
40  
41  
42  
43  
44  
45  
46  
47  
48  
49  
50  
51  
52  
53  
54  
55  
56  
57  
58  
59  
60

For peer review only

1  
2  
3  
4  
5  
6  
7  
8  
9  
10  
11  
12  
13  
14  
15  
16  
17  
18  
19  
20  
21  
22  
23  
24  
25  
26  
27  
28  
29  
30  
31  
32  
33  
34  
35  
36  
37  
38  
39  
40  
41  
42  
43  
44  
45  
46  
47  
48  
49  
50  
51  
52  
53  
54  
55  
56  
57  
58  
59  
60

For peer review only



1  
2  
3  
4  
5  
6  
7  
8  
9  
10  
11  
12  
13  
14  
15  
16  
17  
18  
19  
20  
21  
22  
23  
24  
25  
26  
27  
28  
29  
30  
31  
32  
33  
34  
35  
36  
37  
38  
39  
40  
41  
42  
43  
44  
45  
46  
47  
48  
49  
50  
51  
52  
53  
54  
55  
56  
57  
58  
59  
60

For peer review only

1  
2  
3  
4  
5  
6  
7  
8  
9  
10  
11  
12  
13  
14  
15  
16  
17  
18  
19  
20  
21  
22  
23  
24  
25  
26  
27  
28  
29  
30  
31  
32  
33  
34  
35  
36  
37  
38  
39  
40  
41  
42  
43  
44  
45  
46  
47  
48  
49  
50  
51  
52  
53  
54  
55  
56  
57  
58  
59  
60

For peer review only

1  
2  
3  
4  
5  
6  
7  
8  
9  
10  
11  
12  
13  
14  
15  
16  
17  
18  
19  
20  
21  
22  
23  
24  
25  
26  
27  
28  
29  
30  
31  
32  
33  
34  
35  
36  
37  
38  
39  
40  
41  
42  
43  
44  
45  
46  
47  
48  
49  
50  
51  
52  
53  
54  
55  
56  
57  
58  
59  
60

For peer review only

1  
2  
3  
4  
5  
6  
7  
8  
9  
10  
11  
12  
13  
14  
15  
16  
17  
18  
19  
20  
21  
22  
23  
24  
25  
26  
27  
28  
29  
30  
31  
32  
33  
34  
35  
36  
37  
38  
39  
40  
41  
42  
43  
44  
45  
46  
47  
48  
49  
50  
51  
52  
53  
54  
55  
56  
57  
58  
59  
60

For peer review only

1  
2  
3  
4  
5  
6  
7  
8  
9  
10  
11  
12  
13  
14  
15  
16  
17  
18  
19  
20  
21  
22  
23  
24  
25  
26  
27  
28  
29  
30  
31  
32  
33  
34  
35  
36  
37  
38  
39  
40  
41  
42  
43  
44  
45  
46  
47  
48  
49  
50  
51  
52  
53  
54  
55  
56  
57  
58  
59  
60

For peer review only

1  
2  
3  
4  
5  
6  
7  
8  
9  
10  
11  
12  
13  
14  
15  
16  
17  
18  
19  
20  
21  
22  
23  
24  
25  
26  
27  
28  
29  
30  
31  
32  
33  
34  
35  
36  
37  
38  
39  
40  
41  
42  
43  
44  
45  
46  
47  
48  
49  
50  
51  
52  
53  
54  
55  
56  
57  
58  
59  
60

For peer review only

1  
2  
3  
4  
5  
6  
7  
8  
9  
10  
11  
12  
13  
14  
15  
16  
17  
18  
19  
20  
21  
22  
23  
24  
25  
26  
27  
28  
29  
30  
31  
32  
33  
34  
35  
36  
37  
38  
39  
40  
41  
42  
43  
44  
45  
46  
47  
48  
49  
50  
51  
52  
53  
54  
55  
56  
57  
58  
59  
60

For peer review only

1  
2  
3  
4  
5  
6  
7  
8  
9  
10  
11  
12  
13  
14  
15  
16  
17  
18  
19  
20  
21  
22  
23  
24  
25  
26  
27  
28  
29  
30  
31  
32  
33  
34  
35  
36  
37  
38  
39  
40  
41  
42  
43  
44  
45  
46  
47  
48  
49  
50  
51  
52  
53  
54  
55  
56  
57  
58  
59  
60

elae

For peer review only



|    |             |
|----|-------------|
| 1  |             |
| 2  | ICD-10 code |
| 3  | A52.1       |
| 4  | A52.3       |
| 5  | A52.7       |
| 6  | A52.8       |
| 7  | A52.9       |
| 8  | C71.0       |
| 9  | C71.1       |
| 10 | C71.1       |
| 11 | C71.2       |
| 12 | C71.3       |
| 13 | C71.4       |
| 14 | C71.5       |
| 15 | C71.6       |
| 16 | C71.6       |
| 17 | C71.7       |
| 18 | C71.8       |
| 19 | C71.8       |
| 20 | C71.9       |
| 21 | C72.0       |
| 22 | C72.1       |
| 23 | C72.2       |
| 24 | C72.3       |
| 25 | C72.3       |
| 26 | C72.4       |
| 27 | C72.5       |
| 28 | C72.8       |
| 29 | C72.9       |
| 30 | C72.9       |
| 31 | D33.0       |
| 32 | D33.1       |
| 33 | D33.2       |
| 34 | D33.3       |
| 35 | D33.4       |
| 36 | D33.4       |
| 37 | D33.7       |
| 38 | D33.9       |
| 39 | E10.4       |
| 40 | E11.4       |
| 41 | E12.4       |
| 42 | E12.4       |
| 43 | E13.4       |
| 44 | E14.4       |
| 45 | F00.0       |
| 46 | F00.1       |
| 47 | F00.2       |
| 48 | F00.2       |
| 49 | F00.9       |
| 50 | F01.0       |
| 51 | F01.1       |
| 52 | F01.2       |
| 53 | F01.2       |
| 54 | F01.3       |
| 55 | F01.8       |
| 56 | F01.9       |
| 57 | F02.0       |
| 58 | F02.1       |
| 59 | F02.1       |
| 60 | F02.2       |
|    | F02.3       |

For peer review only

1  
2 F02.4  
3 F02.8  
4 F03  
5 F04  
6 F05.0  
7 F05.1  
8 F06.7  
9 F06.8  
10 F06.8  
11 F06.9  
12 G03.1  
13 G03.2  
14 G09  
15 G10  
16 G11.0  
17 G11.1  
18 G11.2  
19 G11.3  
20 G11.4  
21 G11.8  
22 G11.9  
23 G12.0  
24 G12.1  
25 G12.2  
26 G12.8  
27 G12.9  
28 G13.0  
29 G13.1  
30 G13.2  
31 G13.8  
32 G14  
33 G20  
34 G21.0  
35 G21.1  
36 G21.2  
37 G21.3  
38 G21.4  
39 G21.8  
40 G21.9  
41 G22  
42 G23.0  
43 G23.1  
44 G23.2  
45 G23.3  
46 G23.8  
47 G23.9  
48 G24.1  
49 G24.2  
50 G24.3  
51 G24.4  
52 G24.8

For peer review only

1  
2 G24.9  
3 G25.2  
4 G25.3  
5 G25.5  
6 G25.8  
7 G25.9  
8 G26  
9  
10 G30.0  
11 G30.1  
12 G30.8  
13 G30.9  
14 G31.0  
15 G31.1  
16 G31.2  
17 G31.8  
18 G31.9  
19 G32.0  
20 G32.8  
21 G35  
22 G36.0  
23 G37.0  
24 G37.1  
25 G37.2  
26 G37.5  
27 G37.8  
28 G37.9  
29 G40.0  
30 G40.1  
31 G40.2  
32 G40.3  
33 G40.4  
34 G40.5  
35 G40.6  
36 G40.7  
37 G40.8  
38 G40.9  
39 G41.0  
40 G41.1  
41 G41.2  
42 G41.8  
43 G41.9  
44 G43.0  
45 G43.1  
46 G43.2  
47 G43.3  
48 G43.8  
49 G43.9  
50 G44.0  
51 G44.1  
52 G44.2

For peer review only

1  
2 G44.3  
3 G44.8  
4 G45.0  
5 G45.1  
6 G45.2  
7  
8 G46.0  
9 G46.1  
10 G46.2  
11 G46.3  
12  
13 G46.4  
14 G46.5  
15 G46.6  
16 G46.7  
17 G46.8  
18  
19 G47.4  
20 G50.0  
21 G50.1  
22 G50.8  
23 G50.9  
24  
25 G51.2  
26 G51.3  
27 G51.4  
28 G51.8  
29 G51.9  
30  
31 G52.0  
32 G52.1  
33 G52.2  
34 G52.3  
35 G52.7  
36 G52.8  
37  
38 G52.9  
39 G53.1  
40 G53.2  
41 G53.3  
42  
43 G53.8  
44 G54.5  
45 G60.0  
46 G60.1  
47 G60.2  
48  
49 G60.3  
50 G60.8  
51 G60.9  
52 G61.0  
53 G61.1  
54  
55 G61.8  
56 G61.9  
57 G62.0  
58 G62.1  
59 G62.2  
60 G62.8

For peer review only

1  
2 G62.9  
3 G63.0  
4 G63.1  
5 G63.2  
6 G63.3  
7 G63.4  
8 G63.5  
9 G63.6  
10 G63.8  
11 G64  
12 G70.0  
13 G70.1  
14 G70.2  
15 G70.8  
16 G70.9  
17 G71.0  
18 G71.1  
19 G71.2  
20 G71.3  
21 G71.8  
22 G71.9  
23 G72.0  
24 G72.1  
25 G72.2  
26 G72.3  
27 G72.4  
28 G72.8  
29 G73.0  
30 G73.1  
31 G73.2  
32 G73.3  
33 G73.6  
34 G73.7  
35 G80.0  
36 G80.1  
37 G80.2  
38 G80.3  
39 G80.4  
40 G80.8  
41 G80.9  
42 G81.0  
43 G81.1  
44 G81.9  
45 G82.0  
46 G82.1  
47 G82.2  
48 G82.3  
49 G82.4  
50 G82.5  
51 G83.0

For peer review only

1  
2 G83.1  
3 G83.2  
4 G83.3  
5 G83.5  
6 G83.6  
7 G83.8  
8 G83.9  
9 G90.0  
10 G90.1  
11 G90.4  
12 G90.8  
13 G90.9  
14 G91.0  
15 G91.1  
16 G91.2  
17 G91.3  
18 G91.8  
19 G91.9  
20 G92  
21 G93.0  
22 G93.1  
23 G93.2  
24 G93.4  
25 G93.5  
26 G93.8  
27 G93.9  
28 G94.1  
29 G94.2  
30 G94.3  
31 G94.8  
32 C95.0  
33 C95.1  
34 C95.8  
35 C95.9  
36 C96.1  
37 C96.8  
38 C96.9  
39 G97.2  
40 G98  
41 G99.0  
42 G99.1  
43 G99.2  
44 G99.8  
45 H46  
46 M14.6  
47 Q00.0  
48 Q00.1  
49 Q00.2  
50 Q01.0  
51 Q01.1

For peer review only

1  
2 Q01.2  
3 Q01.8  
4 Q01.9  
5 Q02  
6 Q03.0  
7 Q03.1  
8 Q03.8  
9 Q03.9  
10 Q04.0  
11 Q04.1  
12 Q04.2  
13 Q04.3  
14 Q04.4  
15 Q04.5  
16 Q04.6  
17 Q04.8  
18 Q04.9  
19 Q05.0  
20 Q05.1  
21 Q05.2  
22 Q05.3  
23 Q05.4  
24 Q05.5  
25 Q05.6  
26 Q05.7  
27 Q05.8  
28 Q05.9  
29 Q06.0  
30 Q06.1  
31 Q06.2  
32 Q06.3  
33 Q06.4  
34 Q06.8  
35 Q06.9  
36 Q07.0  
37 Q07.8  
38 Q07.9  
39 Q85.0  
40 Q85.1  
41 Q85.8  
42 Q85.9  
43  
44  
45  
46  
47  
48  
49  
50  
51  
52  
53  
54  
55  
56  
57  
58  
59  
60

For peer review only

1  
2 Medcodeid  
3 1009531000006118  
4 1009571000006115  
5 1009611000006113  
6 1009631000006119  
7 1009651000006114  
8 1129781000000117  
9 1158111000000115  
10 1158321000000112  
11 1550051000000113  
12 1741561000006119  
13 3003361000006114  
14 3155151000006112  
15 7282231000006119  
16 7758091000006113  
17 8337561000006119  
18 13697811000006116  
19 296574014  
20 146051000006113  
21 201751000006110  
22 423361000006118  
23 423481000006119  
24 423511000006110  
25 426521000006114  
26 426531000006112  
27 426541000006119  
28 882791000006118  
29 2740341000000113  
30 13624181000006116  
31 127638013  
32 1234038018  
33 1705901000006118  
34 3750051000006112  
35 25776014  
36 63896011  
37 600811000006111  
38 1224941015  
39 3334501000006112  
40 378491010  
41 378497014  
42 1224879014  
43 88291000006114  
44 88301000006110  
45 88311000006113  
46 88321000006117  
47 636711000006113  
48 3334491000006116  
49 4831001000006119  
50 13621171000006117  
51 108541018

For peer review only



1  
2 829441000006116  
3 296995010  
4 696681000006115  
5 696701000006117  
6 3562061000006117  
7 3562141000006117  
8 3729481000006119  
9 10374011  
10 557191000000119  
11 378499012  
12 378500015  
13 239991000006111  
14 315350012  
15 1224880012  
16 88251000006115  
17 88261000006118  
18 88271000006113  
19 2835541000006116  
20 424971000006111  
21 1798621000000119  
22 7375381000006117  
23 7520191000006112  
24 7558801000006110  
25 7791221000006119  
26 53891000006113  
27 7769521000006118  
28  
29  
30  
31  
32  
33  
34  
35  
36  
37  
38  
39  
40  
41  
42  
43  
44  
45  
46  
47  
48  
49  
50  
51  
52  
53  
54  
55  
56  
57  
58  
59  
60

For peer review only

1  
2 Term  
3 Cause of learning disabilities: Down's syndrome  
4 Cause of learning disabilities: Fragile X syndrome  
5 Cause of learning disabilities: Microcephaly  
6 Cause of learning disabilities: Prader-Willi syndrome  
7 Cause of learning disabilities: Rett syndrome  
8 Severe learning disability  
9 Preferred place of care - learning disability unit  
10 Preferred place of death: learning disability unit  
11 Profound learning disability  
12 Excepted from learning disability quality indicators - patient unsuitable  
13 Profound learning disability  
14 Severe learning disability  
15 Nonverbal learning disorder  
16 X-linked epilepsy with learning disability and behaviour disorder syndrome  
17 Significant learning disability  
18 Significant learning disability  
19 [X]Severe mental retardation, other impairments of behaviour  
20 Severe mental retardation, IQ in range 20-34  
21 Profound mental retardation with IQ less than 20  
22 [X]Prfnd mental retardation without mention impairment behav  
23 [X]Profound ment retard sig impairmnt behav req attent/treat  
24 [X]Profound mental retardation, other impairments of behavr  
25 [X]Sev mental retard sig impairment behav req attent/treatmt  
26 [X]Sev mental retard with statement no or min impairm behav  
27 [X]Sev mental retardation without mention impairment behav  
28 Severe mental retardation  
29 Severe mental retardation without significant impairment of behaviour  
30 Infantile spasms, psychomotor retardation, progressive brain atrophy, basal ganglia disease syndror  
31 Angelman syndrome  
32 Angelman's syndrome  
33 Angelman syndrome  
34 Angelman syndrome  
35 Coffin-Lowry syndrome  
36 Cornelia de Lange syndrome  
37 Cri du chat syndrome  
38 Dubowitz syndrome  
39 Edwards syndrome  
40 Pseudotrismy 18  
41 Partial trisomy 18 in Edward's syndrome  
42 Trisomy 18 NOS  
43 Trisomy 18, meiotic nondisjunction  
44 Trisomy 18, mitotic nondisjunction  
45 Trisomy 18 - mitotic nondisjunction mosaicism  
46 Trisomy 18, translocation  
47 Edward's syndrome - trisomy 18  
48 Complete trisomy 18 syndrome  
49 Trisomy 18 - meiotic nondisjunction  
50 Distal trisomy 18q  
51 Hurler's syndrome

1 Hurler's syndrome  
2 Cerebral degeneration in mucopolysaccharidoses  
3 Mucopolysaccharidosis, type 1  
4 Mucopolysaccharidosis type III  
5 Mucopolysaccharidosis, MPS-I-H  
6 Mucopolysaccharidosis type I-H  
7 Mucopolysaccharidosis, MPS-I  
8 Laurence-Moon-Biedl syndrome  
9 Mowat-Wilson syndrome  
10 Patau's syndrome NOS  
11 Partial trisomy 13 in Patau's syndrome  
12 Patau syndrome  
13 Trisomy 13, meiotic nondisjunction  
14 Trisomy 13 NOS  
15 Trisomy 13, mitotic nondisjunction  
16 Trisomy 13 - mitotic nondisjunction mosaicism  
17 Trisomy 13, translocation  
18 Complete trisomy 13 syndrome  
19 Rett syndrome  
20 Chromosome 4q deletion syndrome  
21 Chromosome 3p deletion syndrome  
22 Chromosome 1p36 deletion syndrome  
23 Chromosome 2q37 deletion syndrome  
24 Chromosome Xp11.3 microdeletion syndrome  
25 Wolff - Hirschorn syndrome  
26 Wolf Hirschhorn syndrome  
27  
28  
29  
30  
31  
32  
33  
34  
35  
36  
37  
38  
39  
40  
41  
42  
43  
44  
45  
46  
47  
48  
49  
50  
51  
52  
53  
54  
55  
56  
57  
58  
59  
60

1  
2  
3  
4  
5  
6  
7  
8  
9  
10  
11  
12  
13  
14  
15  
16  
17  
18  
19  
20  
21  
22  
23  
24  
25  
26  
27  
28  
29  
30  
31  
32  
33  
34  
35  
36  
37  
38  
39  
40  
41  
42  
43  
44  
45  
46  
47  
48  
49  
50  
51  
52  
53  
54  
55  
56  
57  
58  
59  
60

me

For peer review only

| ICD-10 code | Term                                                                                             |
|-------------|--------------------------------------------------------------------------------------------------|
| F72.0       | Severe mental retardation with the statement of no, or minimal, impairment of behaviour          |
| F72.1       | Severe mental retardation significant impairment of behaviour requiring attention or treatment   |
| F72.8       | Severe mental retardation other impairments of behaviour                                         |
| F72.9       | Severe mental retardation without mention of impairment of behaviour                             |
| F73.0       | Profound mental retardation with the statement of no, or minimal, impairment of behaviour        |
| F73.1       | Profound mental retardation significant impairment of behaviour requiring attention or treatment |
| F73.8       | Profound mental retardation other impairments of behaviour                                       |
| F73.9       | Profound mental retardation without mention of impairment of behaviour                           |
| F78.1       | Other mental retardation significant impairment of behaviour requiring attention or treatment    |
| F80.3       | Acquired aphasia with epilepsy [Landau-Kleffner]                                                 |
| F84.2       | Rett syndrome                                                                                    |
| F84.3       | Other childhood disintegrative disorder                                                          |
| Q90.0       | Trisomy 21, meiotic nondisjunction                                                               |
| Q90.1       | Trisomy 21, mosaicism (mitotic nondisjunction)                                                   |
| Q90.2       | Trisomy 21, translocation                                                                        |
| Q90.9       | Down syndrome, unspecified                                                                       |
| Q91.0       | Trisomy 18, meiotic nondisjunction                                                               |
| Q91.1       | Trisomy 18, mosaicism (mitotic nondisjunction)                                                   |
| Q91.2       | Trisomy 18, translocation                                                                        |
| Q91.3       | Edwards syndrome, unspecified                                                                    |
| Q91.4       | Trisomy 13, meiotic nondisjunction                                                               |
| Q91.5       | Trisomy 13, mosaicism (mitotic nondisjunction)                                                   |
| Q91.6       | Trisomy 13, translocation                                                                        |
| Q91.7       | Patau syndrome, unspecified                                                                      |
| Q92.0       | Whole chromosome trisomy, meiotic nondisjunction                                                 |
| Q92.1       | Whole chromosome trisomy, mosaicism (mitotic nondisjunction)                                     |
| Q92.2       | Major partial trisomy                                                                            |
| Q92.3       | Minor partial trisomy                                                                            |
| Q92.7       | Triploidy and polyploidy                                                                         |
| Q92.8       | Other specified trisomies and partial trisomies of autosomes                                     |
| Q92.9       | Trisomy and partial trisomy of autosomes, unspecified                                            |
| Q93.3       | Deletion of short arm of chromosome 4                                                            |
| Q93.4       | Deletion of short arm of chromosome 5                                                            |
| Q93.5       | Other deletions of part of a chromosome                                                          |
| Q93.6       | Deletions seen only at prometaphase                                                              |
| Q93.7       | Deletions with other complex rearrangements                                                      |
| Q93.8       | Other deletions from the autosomes                                                               |
| Q93.9       | Deletion from autosomes, unspecified                                                             |
| Q95.2       | Balanced autosomal rearrangement in abnormal individual                                          |
| Q95.3       | Balanced sex/autosomal rearrangement in abnormal individual                                      |

1  
2  
3  
4  
5  
6  
7  
8  
9  
10  
11  
12  
13  
14  
15  
16  
17  
18  
19  
20  
21  
22  
23  
24  
25  
26  
27  
28  
29  
30  
31  
32  
33  
34  
35  
36  
37  
38  
39  
40  
41  
42  
43  
44  
45  
46  
47  
48  
49  
50  
51  
52  
53  
54  
55  
56  
57  
58  
59  
60

nt

For peer review only

| Medcodeid        | Term                                            |
|------------------|-------------------------------------------------|
| 378493013        | Down's syndrome NOS                             |
| 378494019        | Partial trisomy 21 in Down's syndrome           |
| 2159902018       | Suspected Downs syndrome                        |
| 628281000006114  | Down's syndrome                                 |
| 893481000006117  | Down's syndrome                                 |
| 1009531000006118 | Cause of learning disabilities: Down's syndrome |
| 1776611000006113 | Reason for referral: Downs Syndrome             |
| 1922491000006113 | Down syndrome body mass index centile           |
| 2376321000000116 | Down's syndrome height centile                  |
| 2376331000000119 | Down's syndrome weight centile                  |
| 3161041000006119 | Down syndrome                                   |
| 3161061000006115 | Downs syndrome                                  |
| 1224878018       | Trisomy 21 NOS                                  |
| 3528203016       | Trisomy 21                                      |
| 88351000006114   | Trisomy 21, meiotic nondisjunction              |
| 88361000006111   | Trisomy 21, mitotic nondisjunction              |
| 88371000006116   | Trisomy 21- mitotic nondisjunction mosaicism    |
| 88381000006118   | Trisomy 21, translocation                       |
| 117831000006117  | Suspect trisomy 21 foetus                       |
| 222121000000113  | Trisomy 21                                      |
| 3161031000006112 | Complete trisomy 21 syndrome                    |
| 4830941000006112 | Trisomy 21- meiotic nondisjunction              |
| 68472012         | Mongolism                                       |

1  
2  
3  
4  
5  
6  
7  
8  
9  
10  
11  
12  
13  
14  
15  
16  
17  
18  
19  
20  
21  
22  
23  
24  
25  
26  
27  
28  
29  
30  
31  
32  
33  
34  
35  
36  
37  
38  
39  
40  
41  
42  
43  
44  
45  
46  
47  
48  
49  
50  
51  
52  
53  
54  
55  
56  
57  
58  
59  
60

| ICD-10 code | Term                                           |
|-------------|------------------------------------------------|
| Q90.0       | Trisomy 21, meiotic nondisjunction             |
| Q90.1       | Trisomy 21, mosaicism (mitotic nondisjunction) |
| Q90.2       | Trisomy 21, translocation                      |
| Q90.9       | Down syndrome, unspecified                     |

For peer review only



1  
2 Medcodeid  
3 292553010  
4 459292011  
5 1780311019  
6 72711000006117  
7 84291000006117  
8 84371000006110  
9 84421000006115  
10 84451000006112  
11 2967831017  
12 84411000006111  
13 913931000006116  
14 12332281000006119  
15 8022441000006118  
16 6961081000006118  
17 6970621000006114  
18 12331231000006110  
19 12363721000006110  
20 4757991000006116  
21 6050081000006114  
22 6980001000006117  
23 12704951000006115  
24 84361000006115  
25 913541000006118  
26 84321000006114  
27 913781000006117  
28 84401000006113  
29 12331221000006112  
30 12332271000006117  
31 8027491000006113  
32 8024761000006118  
33 12085801000006113  
34 12345471000006114  
35 8022601000006118  
36 12370631000006117  
37 8025181000006114  
38 8040341000006111  
39 8037821000006110  
40 8022431000006111  
41 8022551000006115  
42 8032761000006111  
43 8050091000006115  
44 8022561000006118  
45 8006221000006115  
46 8037831000006113  
47 7969211000006115  
48 12102641000006114  
49 8022401000006115  
50 8027471000006112  
51 12363211000006112

For peer review only

1  
2 8032741000006112  
3 7287641000006112  
4 8024771000006113  
5 8019531000006110  
6 7696791000006110  
7  
8 3526507010  
9 6967091000006111  
10 8034431000006118  
11 8043591000006119  
12  
13 8027411000006115  
14 12370731000006114  
15 8026051000006110  
16 12370711000006115  
17 12370871000006115  
18 8026071000006117  
19 8034841000006114  
20 8120371000006113  
21 6971871000006117  
22 7098241000006117  
23 8027391000006115  
24 12085811000006111  
25 8232111000006119  
26 12370791000006113  
27 84731000006111  
28 913841000006116  
29 928501000006119  
30 616621000006115  
31 913941000006114  
32 84721000006113  
33 913521000006113  
34 913661000006118  
35 84771000006114  
36 7098211000006116  
37 12370361000006118  
38 12363201000006114  
39 7966541000006112  
40 8026061000006112  
41 12085821000006115  
42 12370371000006113  
43 8019521000006112  
44 8027511000006119  
45 12704941000006117  
46 292541011  
47 12332751000006115  
48 12705071000006113  
49 12334621000006111  
50 3537388019  
51 12370281000006118  
52 7708091000006118  
53 7287611000006113

For peer review only

1 913811000006115  
2 84341000006119  
3 457326014  
4 292540012  
5 7066041000006112  
6 12102631000006116  
7 8077141000006113  
8 12370721000006111  
9 928461000006119  
10 616611000006111  
11 8119341000006116  
12 12370891000006119  
13 8032751000006114  
14 12370801000006114  
15 8019541000006117  
16 8032731000006119  
17 6971901000006117  
18 12332761000006118  
19 12702371000006116  
20 84461000006114  
21 12345461000006119  
22 197984010  
23 3522045015  
24 12370621000006115  
25 7500221000006113  
26 7814941000006115  
27 4796311000006117  
28 12102661000006113  
29 8032781000006118  
30 8022541000006117  
31 8119331000006114  
32 12370611000006111  
33 7500251000006116  
34 938301000006114  
35 84441000006110  
36 84331000006112  
37 913481000006113  
38 5754581000006110  
39 12363671000006118  
40 84281000006115  
41 84301000006116  
42 84311000006118  
43 292548017  
44 12489581000006110  
45 7095251000006110  
46 429971019  
47 6969521000006113  
48 12370941000006118  
49 12370931000006111  
50 12370821000006116

For peer review only

1  
2 8022481000006112  
3 8022491000006110  
4 8027451000006119  
5 8043331000006112  
6 7969221000006111  
7  
8 8043321000006114  
9 8032771000006116  
10 84431000006117  
11 913901000006112  
12 12370271000006116  
13 12363661000006113  
14 8022461000006119  
15 12705001000006119  
16 12702361000006111  
17 84391000006111  
18 12370811000006112  
19 8043601000006110  
20 8034441000006111  
21 12370881000006117  
22 7075891000006110  
23 12370901000006115  
24 12085831000006117  
25 8030331000006117  
26 913451000006117  
27 84351000006117  
28 84381000006113  
29 913511000006117  
30 12334611000006115  
31 1665751000000119  
32 459161015  
33 459296014  
34 8025171000006111  
35 12370741000006116  
36 8032081000006115  
37 928521000006112  
38 299601000000114  
39 616681000006116  
40 616591000006117  
41 616601000006113  
42 616641000006110  
43 616651000006112  
44 616671000006119  
45 292482014  
46 616661000006114  
47 459309011  
48 493773010  
49 1223148019  
50 459162010  
51 771381000006115  
52 771401000006115

For peer review only

1 772141000006118  
2 913651000006115  
3 913831000006114  
4 913921000006119  
5 913981000006115  
6 6051171000006117  
7 280521000006117  
8 2949881000006116  
9 772181000006112  
10 913681000006111  
11 2949871000006119  
12 7587011000006110  
13 771331000006116  
14 771371000006118  
15 771411000006117  
16 772131000006111  
17 772151000006116  
18 787111000006112  
19 771421000006113  
20 73466011  
21 281181000006116  
22 2867421000006114  
23 772171000006114  
24 913711000006112  
25 913891000006113  
26 280541000006112  
27 281161000006114  
28 771341000006114  
29 772161000006119  
30 913531000006111  
31 280531000006119  
32 2867431000006112  
33 11927551000006115  
34 459293018  
35 771361000006113  
36 913771000006115  
37 913801000006118  
38 280571000006116  
39 72651000006114  
40 280511000006113  
41 6050071000006111  
42 6050041000006115  
43 77727018  
44 771351000006111  
45 771391000006117  
46 913621000006112  
47 429972014  
48 292551012  
49 429970018  
50 457325013

For peer review only

1  
2 459294012  
3 292550013  
4 84681000006118  
5 84711000006117  
6 84821000006118  
7  
8 913461000006115  
9 913851000006119  
10 928491000006110  
11 928511000006116  
12 928531000006110  
13 938311000006112  
14 6960431000006119  
15 6970631000006112  
16 6972441000006117  
17 6979991000006111  
18 6050061000006116  
19 6980431000006116  
20 84751000006116  
21 913671000006113  
22 913791000006119  
23 1667941000000112  
24 913491000006111  
25 8022411000006117  
26 8027421000006111  
27 7609891000006111  
28 12102651000006111  
29 12363221000006116  
30 12345481000006112  
31 6969531000006111  
32 7098221000006112  
33 84661000006111  
34 7966551000006114  
35 12702381000006118  
36 8014491000006111  
37 928471000006114  
38 84781000006112  
39 84801000006111  
40 2288011000000114  
41 6971881000006119  
42 7098231000006110  
43 913911000006110  
44 292543014  
45 6951081000006112  
46 6954991000006112  
47 6961901000006111  
48 84741000006118  
49 292538019  
50 12450761000006110  
51 8027461000006117  
52 7287621000006117

For peer review only

1  
2 6955501000006113  
3 6961091000006115  
4 84831000006115  
5 494564012  
6 459163017  
7  
8 8232101000006117  
9 8027481000006110  
10 6971891000006116  
11 11903141000006113  
12 5754621000006110  
13 6965561000006116  
14 913551000006116  
15 459295013  
16 1658861000000113  
17 8030341000006110  
18 7609851000006117  
19 8027401000006118  
20 8027501000006117  
21 84811000006114  
22 84701000006115  
23 6962751000006117  
24 6986151000006117  
25 5754611000006119  
26 913821000006111  
27 72721000006113  
28 84651000006114  
29 84671000006116  
30 84761000006119  
31 7287651000006114  
32 3253241000006117  
33 12336111000006119  
34 8440231000006115  
35 7480691000006118  
36 7480711000006115  
37 9312981000006113  
38 6965571000006111  
39 8014501000006115  
40 12336121000006110  
41 7609881000006113  
42 84691000006115  
43 7609841000006119  
44 8022471000006114  
45 8440241000006113  
46 11927561000006118  
47 7783451000006114  
48 7708051000006112  
49 459169018  
50 7480681000006116  
51 7708121000006119  
52 3209431000006116  
53  
54  
55  
56  
57  
58  
59  
60

For peer review only

1 7708071000006119  
2 84791000006110  
3 3253231000006110  
4 7480701000006118  
5 12344821000006114  
6 8084961000006111  
7 6961101000006114  
8 6951091000006110  
9 6971921000006110  
10 6971911000006119  
11 6960441000006112  
12 6972451000006115  
13 6980441000006114  
14 9312991000006111  
15 7066051000006114  
16 479511000000117  
17 7966931000006114  
18 7966941000006116  
19 12332111000006115  
20 12332101000006118  
21 881451000006113  
22 3209441000006114  
23 6979251000006110  
24 3209431000006116  
25 616481000006119  
26 616491000006116  
27 616501000006112  
28 616511000006110  
29 292483016  
30 616531000006116  
31 616541000006114  
32 12718861000006118  
33 616551000006111  
34 616561000006113  
35 616571000006118  
36 616581000006115  
37 5109461000006115  
38 479571000000110  
39 6959811000006110  
40 6977431000006113  
41 6969931000006116  
42 6982521000006119  
43 8084961000006111  
44 7966951000006119  
45 12702391000006115  
46 6959801000006112  
47 12704961000006118  
48 12762301000006111  
49 6983691000006114  
50 12704981000006111

For peer review only



1 6982511000006110  
2 6982151000006118  
3 12336881000006117  
4 12336871000006115  
5 12705011000006116  
6 6977971000006119  
7 12335681000006111  
8 12335671000006113  
9 6975211000006112  
10 6975221000006116  
11 12363691000006117  
12 7708071000006119  
13 12705081000006111  
14 12363681000006115  
15 850691000006118  
16 1488898011  
17 1667891000000113  
18 7783451000006114  
19 11927561000006118  
20 1223148019  
21 840951000006119  
22 914391000006116  
23 841351000006110  
24 1223147012  
25 6977421000006110  
26 12704991000006114  
27 6951281000006117  
28 12702401000006118  
29 6954121000006112  
30 12331061000006114  
31 12331051000006112  
32 12704971000006113  
33 6969921000006119  
34 12334131000006118  
35 12334141000006111  
36 493773010  
37 674961000006118  
38 12485441000006119  
39 281161000006114  
40 281181000006116  
41 73466011  
42 280571000006116  
43 281171000006119  
44 459309011  
45 281211000006117  
46 280511000006113  
47 280521000006117  
48 280531000006119  
49 280541000006112  
50 280551000006114

For peer review only

1  
2 280561000006111  
3 280581000006118  
4 280591000006115  
5 587111000006111  
6 587521000006111  
7 641581000006115  
8 457328010  
9 6985001000006110  
10 6985011000006113  
11 6959091000006114  
12 6981621000006113  
13 12363731000006113  
14 7708121000006119  
15 4796321000006113  
16 1988741000006117  
17 11931861000006112  
18 5110001000006118  
19 12336541000006114  
20 12336531000006116  
21 84471000006119  
22 197761014  
23 84481000006116  
24 292590011  
25 2288071000000116  
26 7281511000006118  
27 84491000006118  
28 459310018  
29 84501000006114  
30 914301000006111  
31 938321000006116  
32 84511000006112  
33 292583018  
34 299621000000117  
35 4758011000006112  
36 84521000006116  
37 459167016  
38 928581000006111  
39 928601000006118  
40 84531000006118  
41 914221000006113  
42 84541000006111  
43 292577016  
44 84551000006113  
45 914261000006119  
46 84561000006110  
47 914071000006115  
48 84571000006115  
49 459313016  
50 84581000006117  
51 914051000006113

For peer review only

1 84591000006119  
2 459308015  
3 928561000006118  
4 928541000006117  
5 84601000006110  
6 914241000006118  
7 84611000006113  
8 914031000006118  
9 84621000006117  
10 914151000006112  
11 84631000006119  
12 292579018  
13 84641000006112  
14 457329019  
15 1665721000000112  
16 84841000006113  
17 493774016  
18 84851000006110  
19 292589019  
20 2288061000000111  
21 84861000006112  
22 459311019  
23 84871000006117  
24 914311000006114  
25 938331000006118  
26 12489851000006117  
27 84881000006119  
28 292582011  
29 1667921000000117  
30 84891000006116  
31 459169018  
32 928591000006114  
33 928611000006115  
34 84901000006117  
35 914231000006111  
36 84911000006119  
37 292576013  
38 84921000006110  
39 914271000006114  
40 84931000006113  
41 914081000006117  
42 12702411000006115  
43 84941000006115  
44 459312014  
45 84951000006118  
46 914061000006110  
47 12702421000006111  
48 84961000006116  
49 459306016  
50 928571000006113

For peer review only

1  
2 928551000006115  
3 84971000006111  
4 914251000006116  
5 84981000006114  
6 914041000006111  
7 84991000006112  
8 914161000006114  
9 85001000006117  
10 292581016  
11 85011000006119  
12 457330012  
13 1658901000000118  
14 840971000006112  
15  
16  
17  
18  
19  
20  
21  
22  
23  
24  
25  
26  
27  
28  
29  
30  
31  
32  
33  
34  
35  
36  
37  
38  
39  
40  
41  
42  
43  
44  
45  
46  
47  
48  
49  
50  
51  
52  
53  
54  
55  
56  
57  
58  
59  
60

For peer review only

1  
2 Term

3 Type 1 diabetes mellitus maturity onset  
4 Type 1 diabetes mellitus with arthropathy  
5 Type 1 diabetes mellitus with persistent microalbuminuria  
6 Unstable type 1 diabetes mellitus  
7  
8 Type 1 diabetes mellitus - poor control  
9 Type 1 diabetes mellitus with nephropathy  
10 Type 1 diabetes mellitus with polyneuropathy  
11 Type 1 diabetes mellitus with ulcer  
12  
13 Pre-existing type 1 diabetes mellitus in pregnancy  
14 Type 1 diabetes mellitus with peripheral angiopathy  
15 Type 1 diabetes mellitus with peripheral angiopathy  
16 Retinopathy co-occurrent and due to type 1 diabetes mellitus  
17 Neuropathic arthropathy due to type 1 diabetes mellitus  
18 Gangrene associated with type 1 diabetes mellitus  
19 Peripheral circulatory disorder associated with type 1 diabetes mellitus  
20 Exudative maculopathy co-occurrent and due to type 1 diabetes mellitus  
21 Polyneuropathy co-occurrent and due to type 1 diabetes mellitus  
22 Type 1 diabetes mellitus with hyperosmolar coma  
23 Type 1 diabetes mellitus with hypoglycemic coma  
24 Kidney disorder associated with type 1 diabetes mellitus  
25 Diabetic retinopathy associated with type 1 diabetes mellitus  
26 Type 1 diabetes mellitus with multiple complications  
27 Type 1 diabetes mellitus with multiple complications  
28 Type 1 diabetes mellitus with diabetic cataract  
29 Type 1 diabetes mellitus with mononeuropathy  
30 Type 1 diabetes mellitus with ophthalmic complications  
31 Exudative maculopathy with type 1 diabetes mellitus  
32 Retinopathy with type 1 diabetes mellitus  
33 Chronic kidney disease stage 5 due to type 1 diabetes mellitus  
34 Traction retinal detachment due to type 1 diabetes mellitus  
35 Macular oedema due to type 1 diabetes mellitus  
36 Lumbosacral radiculoplexus neuropathy co-occurrent and due to type 1 diabetes mellitus  
37 Chronic ulcer of skin due to type 1 diabetes mellitus  
38 Peripheral neuropathy with type 1 diabetes mellitus  
39 Hypoglycemia due to type 1 diabetes mellitus  
40 Hypertension concurrent and due to end stage renal disease on dialysis due to type 1 diabetes melli  
41 Hypoglycaemic unawareness in type 1 diabetes mellitus  
42 Nephrotic syndrome due to type 1 diabetes mellitus  
43 Severe malnutrition due to type 1 diabetes mellitus  
44 Vitreous haemorrhage due to type 1 diabetes mellitus  
45 Foot ulcer due to type 1 diabetes mellitus  
46 Osteomyelitis due to type 1 diabetes mellitus  
47 Microalbuminuria due to type 1 diabetes mellitus  
48 Hypoglycemic unawareness in type 1 diabetes mellitus  
49 Mixed hyperlipidaemia due to type 1 diabetes mellitus  
50 Cranial nerve palsy due to type 1 diabetes mellitus  
51 Hypertension in chronic kidney disease due to type 1 diabetes mellitus  
52 Chronic kidney disease stage 4 due to type 1 diabetes mellitus  
53  
54 Autonomic neuropathy co-occurrent and due to type 1 diabetes mellitus

1  
2 Retinal ischemia due to type 1 diabetes mellitus  
3 Type 1 diabetes mellitus well controlled  
4 Rubeosis iridis due to type 1 diabetes mellitus  
5 Proliferative retinopathy due to type 1 diabetes mellitus  
6 Diabetic autonomic neuropathy due to type 1 diabetes mellitus  
7 Disorder of nerve co-occurrent and due to type 1 diabetes mellitus  
8 Diabetic oculopathy associated with type 1 diabetes mellitus  
9 Retinal oedema due to type 1 diabetes mellitus  
10 Mild nonproliferative retinopathy due to type 1 diabetes mellitus  
11 Chronic kidney disease stage 2 due to type 1 diabetes mellitus  
12 Rubeosis iridis with type 1 diabetes mellitus  
13 Ankle ulcer due to type 1 diabetes mellitus  
14 Traction retinal detachment with type 1 diabetes mellitus  
15 Retinal oedema with type 1 diabetes mellitus  
16 Forefoot ulcer due to type 1 diabetes mellitus  
17 Ulcer of lower limb due to type 1 diabetes mellitus  
18 Dyslipidemia due to type 1 diabetes mellitus  
19 Hypoglycaemic coma in type 1 diabetes mellitus  
20 Dietary advice for type 1 diabetes  
21 Chronic kidney disease stage 1 due to type 1 diabetes mellitus  
22 Macular edema due to type 1 diabetes mellitus  
23 Referral to type 1 diabetes structured education programme  
24 Retinal ischaemia with type 1 diabetes mellitus  
25 Multiple complications of type 1 diabetes mellitus  
26 Renal disorder associated with type 1 diabetes mellitus  
27 Ketoacidosis in type 1 diabetes mellitus  
28 Type 1 diabetes mellitus without complication  
29 Peripheral angiopathy due to type 1 diabetes mellitus  
30 Mononeuropathy with type 1 diabetes mellitus  
31 Neurological disorder with type 1 diabetes mellitus  
32 Retinopathy with type 1 diabetes mellitus  
33 Disorder of eye with type 1 diabetes mellitus  
34 Dietary education for type 1 diabetes mellitus  
35 Erectile dysfunction with type 1 diabetes mellitus  
36 Autonomic neuropathy with type 1 diabetes mellitus  
37 Diabetic erectile dysfunction associated with type 1 diabetes mellitus  
38 Heel AND/OR midfoot ulcer due to type 1 diabetes mellitus  
39 Macular edema co-occurrent and due to type 1 diabetes mellitus  
40 Erectile dysfunction co-occurrent and due to type 1 diabetes mellitus  
41 Nonproliferative diabetic retinopathy due to type 1 diabetes mellitus  
42 End stage renal disease on dialysis due to type 1 diabetes mellitus  
43 Neurological disorder associated with type 1 diabetes mellitus  
44 Type 1 diabetes mellitus with gangrene  
45 Mononeuropathy with type 1 diabetes mellitus  
46 Gastroparesis due to type 1 diabetes mellitus  
47 Neurological disorder co-occurrent and due to type 1 diabetes mellitus  
48 Diabetic oculopathy due to type 1 diabetes mellitus  
49 Disorder of eye co-occurrent and due to type 1 diabetes mellitus  
50 Polyneuropathy due to type 1 diabetes mellitus  
51 Type 1 diabetes mellitus uncontrolled

1 Type 1 diabetes mellitus with polyneuropathy  
2 Type 1 diabetes mellitus with hypoglycaemic coma  
3 Type 1 diabetes mellitus without complication  
4 Type 1 diabetes mellitus with ulcer  
5 Small vessel disease due to type 1 diabetes mellitus  
6 Cranial nerve palsy with type 1 diabetes mellitus  
7 Proteinuria due to type 1 diabetes mellitus  
8 Traction retinal detachment co-occurrent and due to type 1 diabetes mellitus  
9 Persistent proteinuria associated with type 1 diabetes mellitus  
10 Disorder due to type 1 diabetes mellitus  
11 Hyperglycemia due to type 1 diabetes mellitus  
12 Retinal oedema co-occurrent and due to type 1 diabetes mellitus  
13 Diabetic vitreous haemorrhage due to type 1 diabetes mellitus  
14 Retinal ischemia with type 1 diabetes mellitus  
15 Blindness due to type 1 diabetes mellitus  
16 Retinal ischaemia due to type 1 diabetes mellitus  
17 Hypoglycemic coma in type 1 diabetes mellitus  
18 Mononeuropathy co-occurrent and due to type 1 diabetes mellitus  
19 Mononeuropathy associated with type 1 diabetes mellitus  
20 Type 1 diabetes mellitus without complication  
21 Lumbosacral radiculoplexus neuropathy with type 1 diabetes mellitus  
22 Type 1 diabetes mellitus  
23 Hyperosmolarity due to type 1 diabetes mellitus  
24 Blindness co-occurrent and due to type 1 diabetes mellitus  
25 Pre-existing type 1 diabetes mellitus in pregnancy  
26 Acidosis due to type 1 diabetes mellitus  
27 Pre-existing type 1 diabetes mellitus  
28 Cranial nerve palsy co-occurrent and due to type 1 diabetes mellitus  
29 Diabetic vitreous hemorrhage due to type 1 diabetes mellitus  
30 Diabetic dermopathy due to type 1 diabetes mellitus  
31 Hyperglycaemia due to type 1 diabetes mellitus  
32 Nonproliferative retinopathy co-occurrent and due to type 1 diabetes mellitus  
33 Pregnancy and type 1 diabetes mellitus  
34 Exudative maculopathy with type 1 diabetes mellitus  
35 Type 1 diabetes mellitus with retinopathy  
36 Type 1 diabetes mellitus with gangrene  
37 Type 1 diabetes mellitus with ophthalmic complications  
38 Brittle type 1 diabetes mellitus  
39 Gastroparesis co-occurrent and due to type 1 diabetes mellitus  
40 Type 1 diabetes mellitus  
41 Type 1 diabetes mellitus maturity onset  
42 Type 1 diabetes mellitus with arthropathy  
43 Type 1 diabetes mellitus - poor control  
44 Type 1 diabetes mellitus with gangrene  
45 Hyperosmolality due to uncontrolled type 1 diabetes mellitus  
46 Unstable type 1 diabetes mellitus  
47 Persistent microalbuminuria associated with type 1 diabetes mellitus  
48 Moderate nonproliferative retinopathy co-occurrent and due to type 1 diabetes mellitus  
49 Mild nonproliferative retinopathy co-occurrent and due to type 1 diabetes mellitus  
50 Retinal ischemia co-occurrent and due to type 1 diabetes mellitus  
51  
52  
53  
54  
55  
56  
57  
58  
59  
60

1  
2 Peripheral neuropathy due to type 1 diabetes mellitus  
3 Peripheral neuropathy co-occurrent and due to type 1 diabetes mellitus  
4 Chronic kidney disease stage 3 due to type 1 diabetes mellitus  
5 Hyperlipidemia due to type 1 diabetes mellitus  
6 Mixed hyperlipidemia due to type 1 diabetes mellitus  
7 Hyperlipidaemia due to type 1 diabetes mellitus  
8 Vitreous hemorrhage due to type 1 diabetes mellitus  
9 Type 1 diabetes mellitus with renal complications  
10 Type 1 diabetes mellitus with diabetic cataract  
11 Disorder of eye with type 1 diabetes mellitus  
12 Gastroparesis with type 1 diabetes mellitus  
13 Diabetic neuropathic arthropathy due to type 1 diabetes mellitus  
14 Exudative maculopathy associated with type 1 diabetes mellitus  
15 Diabetic cataract associated with type 1 diabetes mellitus  
16 Type 1 diabetes mellitus with neuropathic arthropathy  
17 Retinal ischaemia co-occurrent and due to type 1 diabetes mellitus  
18 Moderate nonproliferative retinopathy due to type 1 diabetes mellitus  
19 Retinal edema due to type 1 diabetes mellitus  
20 Retinal edema with type 1 diabetes mellitus  
21 Amyotrophy due to type 1 diabetes mellitus  
22 Retinal edema co-occurrent and due to type 1 diabetes mellitus  
23 Macular oedema co-occurrent and due to type 1 diabetes mellitus  
24 Chronic kidney disease due to type 1 diabetes mellitus  
25 Type 1 diabetes mellitus with renal complications  
26 Type 1 diabetes mellitus with mononeuropathy  
27 Type 1 diabetes mellitus with neurological complications  
28 Type 1 diabetes mellitus with neurological complications  
29 Neurological disorder with type 1 diabetes mellitus  
30 Type 1 diabetic dietary review  
31 Type 1 diabetes mellitus with hypoglycaemic coma  
32 Type 1 diabetes mellitus with neuropathic arthropathy  
33 Hypoglycaemia due to type 1 diabetes mellitus  
34 Rubeosis iridis co-occurrent and due to type 1 diabetes mellitus  
35 Sensory neuropathy due to type 1 diabetes mellitus  
36 Ketoacidotic coma in type 1 diabetes mellitus  
37 Gastroparesis with type 1 diabetes mellitus  
38 Diabetes mellitus, juvenile, + other specified manifestation  
39 Diabetes mellitus, juvenile +peripheral circulatory disorder  
40 Diabetes mellitus, juvenile type, + ophthalmic manifestation  
41 Diabetes mellitus, juvenile type, with ketoacidosis  
42 Diabetes mellitus, juvenile type, with ketoacidotic coma  
43 Diabetes mellitus, juvenile, + neurological manifestation  
44 Diabetes mellitus, juvenile type, with hyperosmolar coma  
45 Diabetes mellitus, juvenile type, with renal manifestation  
46 Non-insulin dependent diabetes mellitus with arthropathy  
47 NIDDM - Non-insulin dependent diabetes mellitus  
48 Insulin treated non-insulin dependent diabetes mellitus  
49 Insulin dependent diabetes mellitus with hypoglycaemic coma  
50 Insulin dependent diabetes mellitus with multiple complicatn  
51 Insulin dependent diabetes mellitus with polyneuropathy



1 Insulin dependent diab mell with peripheral angiopathy  
2 Insulin dependent diabetes mellitus with retinopathy  
3 Insulin dependent diabetes mellitus with nephropathy  
4 Insulin dependent diab mell with peripheral angiopathy  
5 Insulin dependent diab mell with neuropathic arthropathy  
6 Insulin dependent diabetes mellitus with arthropathy  
7 Non-insulin dependent diabetes mellitus with mononeuropathy  
8 Insulin dependent diabetes mellitus type 1B  
9 Insulin dependent diabetes mellitus - poor control  
10 Insulin dependent diabetes mellitus - poor control  
11 Insulin dependent diabetes mellitus type 1B  
12 Maternal history of non-insulin dependent diabetes mellitus  
13 Insulin dependent diabetes mellitus with arthropathy  
14 Insulin dependent diabetes mellitus with mononeuropathy  
15 Insulin dependent diabetes mellitus with retinopathy  
16 Insulin dependent diab mell with neuropathic arthropathy  
17 Insulin dependent diabetes maturity onset  
18 IDDM-Insulin dependent diabetes mellitus  
19 Insulin dependent diabetes mellitus with ulcer  
20 Non-insulin dependent diabetes mellitus  
21 Non-insulin dependent diabetes mellitus with neuropathic arthropathy  
22 Insulin dependent diabetes mellitus type 1A  
23 Insulin dependent diabetes mellitus  
24 Insulin dependent diabetes maturity onset  
25 Insulin dependent diabetes mellitus with diabetic cataract  
26 Non-insulin dependent diabetes mellitus with polyneuropathy  
27 Non-insulin depend diabetes mellitus with diabetic cataract  
28 Insulin dependent diabetes mellitus with diabetic cataract  
29 Insulin dependent diabetes mellitus  
30 Insulin dependent diabetes mellitus with multiple complicat  
31 Non-insulin dependent diabetes mellitus with nephropathy  
32 Insulin dependent diabetes mellitus type 1A  
33 Insulin dependent diabetes mellitus with ulcer  
34 Insulin dependent diabetes mellitus with arthropathy  
35 Insulin dependent diabetes mellitus with hypoglycaemic coma  
36 Insulin dependent diabetes mellitus with mononeuropathy  
37 Insulin dependent diabetes mellitus with polyneuropathy  
38 Non-insulin dependent diabetes mellitus  
39 Unstable insulin dependent diabetes mellitus  
40 Non-insulin dependent diabetes mellitus with hypoglyca coma  
41 Insulin dependent diabetes mellitus with hypoglycemic coma  
42 Insulin dependent diabetes mellitus with hypoglycaemic coma  
43 Insulin dependent diabetes mellitus  
44 Insulin dependent diabetes mellitus with gangrene  
45 Insulin dependent diabetes mellitus with nephropathy  
46 Insulin dependent diabetes mellitus with gangrene  
47 Unstable insulin dependent diabetes mellitus  
48 Type I diabetes mellitus maturity onset  
49 Unstable type I diabetes mellitus  
50 Type I diabetes mellitus without complication

1  
2 Type I diabetes mellitus with arthropathy  
3 Type I diabetes mellitus - poor control  
4 Type I diabetes mellitus with arthropathy  
5 Type I diabetes mellitus with hypoglycaemic coma  
6 Type I diabetes mellitus with ulcer  
7  
8 Type I diabetes mellitus with renal complications  
9 Type I diabetes mellitus with nephropathy  
10 Type I diabetes mellitus with persistent microalbuminuria  
11 Type I diabetes mellitus with ketoacidosis  
12 Type I diabetes mellitus with ketoacidotic coma  
13 Type I diabetes mellitus with exudative maculopathy  
14 Diabetic retinopathy associated with type I diabetes mellitus  
15 Peripheral circulatory disorder associated with type I diabetes mellitus  
16 Neurological disorder associated with type I diabetes mellitus  
17 Renal disorder associated with type I diabetes mellitus  
18 Type I diabetes mellitus with hypoglycemic coma  
19 Diabetic cataract associated with type I diabetes mellitus  
20 Type I diabetes mellitus with neurological complications  
21 Type I diabetes mellitus with retinopathy  
22 Type I diabetes mellitus with mononeuropathy  
23 Type I diabetes mellitus with gastroparesis  
24 Type I diabetes mellitus with ophthalmic complications  
25 Hypertension in chronic kidney disease due to type I diabetes mellitus  
26 Chronic kidney disease stage 2 due to type I diabetes mellitus  
27 Retinopathy due to brittle type I diabetes mellitus  
28 Cranial nerve palsy with type I diabetes mellitus  
29 Autonomic neuropathy with type I diabetes mellitus  
30 Lumbosacral radiculoplexus neuropathy with type I diabetes mellitus  
31 Persistent microalbuminuria associated with type I diabetes mellitus  
32 Dietary education for type I diabetes mellitus  
33 Type I diabetes mellitus poorly controlled  
34 Erectile dysfunction associated with type I diabetes mellitus  
35 Diabetic oculopathy due to type I diabetes mellitus  
36 Peripheral vascular disease due to type I diabetes  
37 Type I diabetes mellitus with persistent proteinuria  
38 Type I diabetes mellitus with peripheral angiopathy  
39 Type I diabetes mellitus with renal complications  
40 Type I diabetes mellitus in remission  
41 Hypoglycemic coma in type I diabetes mellitus  
42 Dietary advice for type I diabetes  
43 Type I diabetes mellitus with diabetic cataract  
44 Type I diabetes mellitus with gangrene  
45 Ketoacidosis in type I diabetes mellitus  
46 Exudative maculopathy associated with type I diabetes mellitus  
47 Disorder associated with type I diabetes mellitus  
48 Type I diabetes mellitus with nephropathy  
49 Type I diabetes mellitus with ulcer  
50 Type I diabetes mellitus with gangrene  
51 Chronic kidney disease stage 3 due to type I diabetes mellitus  
52 Type I diabetes mellitus uncontrolled

1 Persistent proteinuria associated with type I diabetes mellitus  
2 Gangrene associated with type I diabetes mellitus  
3 Type I diabetes mellitus without complication  
4 Type I diabetes mellitus  
5 Type I diabetes mellitus with hypoglycaemic coma  
6 Referral to type I diabetes structured education programme  
7 Chronic kidney disease stage 4 due to type I diabetes mellitus  
8 Hypoglycaemic coma in type I diabetes mellitus  
9 Diabetic oculopathy associated with type I diabetes mellitus  
10 Labile type I diabetes mellitus  
11 Ketoacidotic coma in type I diabetes mellitus  
12 Type I diabetes mellitus with multiple complications  
13 Type I diabetes mellitus with neuropathic arthropathy  
14 Type I diabetic dietary review  
15 Chronic kidney disease due to type I diabetes mellitus  
16 Neuropathy due to brittle type I diabetes mellitus  
17 Chronic kidney disease stage 1 due to type I diabetes mellitus  
18 Chronic kidney disease stage 5 due to type I diabetes mellitus  
19 Type I diabetes mellitus with retinopathy  
20 Type I diabetes mellitus with gangrene  
21 Mononeuropathy associated with type I diabetes mellitus  
22 Multiple complications of type I diabetes mellitus  
23 Brittle type I diabetes mellitus  
24 Type I diabetes mellitus with polyneuropathy  
25 Unstable type I diabetes mellitus  
26 Type I diabetes mellitus  
27 Type I diabetes mellitus maturity onset  
28 Type I diabetes mellitus with neuropathic arthropathy  
29 Type I diabetes mellitus well controlled  
30 Diabetes mellitus type 1  
31 Cataract due to diabetes mellitus type 1  
32 Eating disorder co-occurrent with diabetes mellitus type 1  
33 H/O diabetes mellitus type 1  
34 History of diabetes mellitus type 1  
35 Skin ulcer of toe due to diabetes mellitus type 1  
36 Diabetes mellitus type 1 with ketoacidotic coma  
37 Diabetes mellitus type 1 without retinopathy  
38 Cataract co-occurrent and due to diabetes mellitus type 1  
39 Retinopathy due to unstable diabetes mellitus type 1  
40 Cataract due to diabetes mellitus type 1  
41 Neuropathy due to unstable diabetes mellitus type 1  
42 Diabetes mellitus type 1 with diabetic Charcot's arthropathy  
43 ED-DMT1 - Eating disorder-diabetes mellitus type 1  
44 Hypoglycemic coma co-occurrent and due to diabetes mellitus type II  
45 Hypoglycaemic coma co-occurrent and due to diabetes mellitus type II  
46 Gastroparesis due to diabetes mellitus type I  
47 Hypoglycaemic coma co-occurrent and due to diabetes mellitus type II  
48 History of diabetes mellitus type II  
49 Polyneuropathy due to diabetes mellitus type II  
50 Diabetes mellitus type II  
51  
52  
53  
54  
55  
56  
57  
58  
59  
60

1  
2     Gastroparesis due to diabetes mellitus type II  
3     Polyneuropathy due to diabetes mellitus type I  
4     Diabetes mellitus type I  
5     History of diabetes mellitus type I  
6     Diabetes type II with amyotrophy  
7     Diabetes type II review  
8     Diabetes type 1 with gangrene  
9     Diabetes type 1 with ketoacidosis  
10    Diabetes type 1 with hypoglycaemic coma  
11    Diabetes type 1 with hypoglycemic coma  
12    Diabetes type 1 with retinopathy  
13    Diabetes type 1 with neurological disorder  
14    Diabetes type 1 with cataract  
15    Diabetes type 1 with diabetic ulcer of toe, skin breakdown  
16    Diabetes type 1 with small vessel disease  
17    Diabetes type 1 review  
18    Angina associated with type 2 diabetes mellitus  
19    Angina associated with type II diabetes mellitus  
20    Cataract co-occurrent and due to diabetes mellitus type 2  
21    Cataract due to diabetes mellitus type 2  
22    Diabetes mellitus -adult onset  
23    Diabetes mellitus type 2  
24    Diabetes mellitus type 2 with ketoacidotic coma  
25    Diabetes mellitus type II  
26    Diabetes mellitus, adult onset, + neurological manifestation  
27    Diabetes mellitus, adult onset, + ophthalmic manifestation  
28    Diabetes mellitus, adult onset, + unspecified complication  
29    Diabetes mellitus, adult onset, no mention of complication  
30    Diabetes mellitus, adult onset, with hyperosmolar coma  
31    Diabetes mellitus, adult onset, with ketoacidosis  
32    Diabetes mellitus, adult onset, with ketoacidotic coma  
33    Diabetes mellitus, adult onset, with no mention of complication  
34    Diabetes mellitus, adult onset, with renal manifestation  
35    Diabetes mellitus, adult with gangrene  
36    Diabetes mellitus, adult, + other specified manifestation  
37    Diabetes mellitus, adult, + peripheral circulatory disorder  
38    Diabetes type 2 on insulin  
39    Diabetes type 2 review  
40    Diabetes type 2 with cataract  
41    Diabetes type 2 with ketoacidosis  
42    Diabetes type 2 with neurological disorder  
43    Diabetes type 2 with retinopathy  
44    Diabetes type II review  
45    Diabetic angina pectoris associated with type 2 diabetes mellitus  
46    Diabetic cataract associated with type 2 diabetes mellitus  
47    Diabetic cataract associated with type II diabetes mellitus  
48    Diabetic oculopathy associated with type 2 diabetes mellitus  
49    Diabetic oculopathy associated with type 2 diabetes mellitus  
50    Diabetic oculopathy associated with type II diabetes mellitus  
51    Diabetic retinopathy associated with type 2 diabetes mellitus

1 Diabetic retinopathy associated with type II diabetes mellitus  
2 Disorder due to type II diabetes mellitus  
3 Disorder of eye co-occurrent and due to type 2 diabetes mellitus  
4 Disorder of eye with type 2 diabetes mellitus  
5 Exudative maculopathy associated with type 2 diabetes mellitus  
6 Exudative maculopathy associated with type II diabetes mellitus  
7 Exudative maculopathy co-occurrent and due to type 2 diabetes mellitus  
8 Exudative maculopathy with type 2 diabetes mellitus  
9 Gangrene associated with type 2 diabetes mellitus  
10 Gangrene associated with type II diabetes mellitus  
11 Gastroparesis co-occurrent and due to type 2 diabetes mellitus  
12 Gastroparesis due to diabetes mellitus type II  
13 Gastroparesis due to type 2 diabetes mellitus  
14 Gastroparesis with type 2 diabetes mellitus  
15 Hyperosmolar non-ketotic state in type 2 diabetes mellitus  
16 Hyperosmolar non-ketotic state in type 2 diabetes mellitus  
17 Hyperosmolar non-ketotic state in type II diabetes mellitus  
18 Hypoglycaemic coma co-occurrent and due to diabetes mellitus type II  
19 Hypoglycemic coma co-occurrent and due to diabetes mellitus type II  
20 Insulin treated non-insulin dependent diabetes mellitus  
21 Insulin treated Type 2 diabetes mellitus  
22 Insulin treated Type 2 diabetes mellitus  
23 Insulin treated Type II diabetes mellitus  
24 Insulin treated Type II diabetes mellitus  
25 Ketoacidosis in type II diabetes mellitus  
26 Ketoacidotic coma in type 2 diabetes mellitus  
27 Kidney disorder associated with type 2 diabetes mellitus  
28 Mononeuropathy associated with type 2 diabetes mellitus  
29 Mononeuropathy associated with type II diabetes mellitus  
30 Mononeuropathy co-occurrent and due to type 2 diabetes mellitus  
31 Mononeuropathy with type 2 diabetes mellitus  
32 Neurologic disorder associated with type 2 diabetes mellitus  
33 Neurologic disorder associated with type II diabetes mellitus  
34 Neurological disorder co-occurrent and due to type 2 diabetes mellitus  
35 Neurological disorder with diabetes type 2  
36 NIDDM - Non-insulin dependent diabetes mellitus  
37 NIDDM with peripheral circulatory disorder  
38 NIDDM with peripheral circulatory disorder  
39 Non-insulin depend diabetes mellitus with diabetic cataract  
40 Non-insulin dependent d m with neuropathic arthropathy  
41 Non-insulin dependent diabetes mellitus  
42 Non-insulin dependent diabetes mellitus  
43 Non-insulin dependent diabetes mellitus - poor control  
44 Non-insulin dependent diabetes mellitus with arthropathy  
45 Non-insulin dependent diabetes mellitus with gangrene  
46 Non-insulin dependent diabetes mellitus with hypoglyca coma  
47 Non-insulin dependent diabetes mellitus with mononeuropathy  
48 Non-insulin dependent diabetes mellitus with nephropathy  
49 Non-insulin dependent diabetes mellitus with polyneuropathy  
50 Non-insulin dependent diabetes mellitus with ulcer

1 Non-insulin-dependent d m with peripheral angiopath  
2 Non-insulin-dependent diabetes mellitus with multiple comps  
3 Non-insulin-dependent diabetes mellitus with neuro comps  
4 Non-insulin-dependent diabetes mellitus with ophthalm comps  
5 Non-insulin-dependent diabetes mellitus with renal comps  
6 Non-insulin-dependent diabetes mellitus with retinopathy  
7 Non-insulin-dependent diabetes mellitus without complication  
8 Peripheral circulatory disorder associated with type 2 diabetes mellitus  
9 Peripheral circulatory disorder associated with type II diabetes mellitus  
10 Persistent microalbuminuria associated with type II diabetes mellitus  
11 Persistent proteinuria associated with type II diabetes mellitus  
12 Polyneuropathy co-occurrent and due to type 2 diabetes mellitus  
13 Polyneuropathy due to diabetes mellitus type II  
14 Pre-existing type 2 diabetes mellitus  
15 Pre-existing type 2 diabetes mellitus in pregnancy  
16 Pre-existing type 2 diabetes mellitus in pregnancy  
17 Pregnancy and type 2 diabetes mellitus  
18 Retinopathy co-occurrent and due to type 2 diabetes mellitus  
19 Retinopathy with type 2 diabetes mellitus  
20 Type 2 diabetes mellitus  
21 Type 2 diabetes mellitus  
22 Type 2 diabetes mellitus - poor control  
23 Type 2 diabetes mellitus - poor control  
24 Type 2 diabetes mellitus in remission  
25 Type 2 diabetes mellitus uncontrolled  
26 Type 2 diabetes mellitus with arthropathy  
27 Type 2 diabetes mellitus with arthropathy  
28 Type 2 diabetes mellitus with diabetic cataract  
29 Type 2 diabetes mellitus with diabetic cataract  
30 Type 2 diabetes mellitus with exudative maculopathy  
31 Type 2 diabetes mellitus with gangrene  
32 Type 2 diabetes mellitus with gangrene  
33 Type 2 diabetes mellitus with gastroparesis  
34 Type 2 diabetes mellitus with hyperosmolar coma  
35 Type 2 diabetes mellitus with hypoglycaemic coma  
36 Type 2 diabetes mellitus with hypoglycaemic coma  
37 Type 2 diabetes mellitus with ketoacidosis  
38 Type 2 diabetes mellitus with ketoacidotic coma  
39 Type 2 diabetes mellitus with mononeuropathy  
40 Type 2 diabetes mellitus with mononeuropathy  
41 Type 2 diabetes mellitus with multiple complications  
42 Type 2 diabetes mellitus with multiple complications  
43 Type 2 diabetes mellitus with nephropathy  
44 Type 2 diabetes mellitus with nephropathy  
45 Type 2 diabetes mellitus with neurological complications  
46 Type 2 diabetes mellitus with neurological complications  
47 Type 2 diabetes mellitus with neuropathic arthropathy  
48 Type 2 diabetes mellitus with neuropathic arthropathy  
49 Type 2 diabetes mellitus with ophthalmic complications  
50 Type 2 diabetes mellitus with ophthalmic complications  
51  
52  
53  
54  
55  
56  
57  
58  
59  
60



1 Type 2 diabetes mellitus with peripheral angiopathy  
2 Type 2 diabetes mellitus with peripheral angiopathy  
3 Type 2 diabetes mellitus with peripheral angiopathy  
4 Type 2 diabetes mellitus with persistent microalbuminuria  
5 Type 2 diabetes mellitus with persistent proteinuria  
6 Type 2 diabetes mellitus with polyneuropathy  
7 Type 2 diabetes mellitus with polyneuropathy  
8 Type 2 diabetes mellitus with polyneuropathy  
9 Type 2 diabetes mellitus with renal complications  
10 Type 2 diabetes mellitus with renal complications  
11 Type 2 diabetes mellitus with retinopathy  
12 Type 2 diabetes mellitus with retinopathy  
13 Type 2 diabetes mellitus with ulcer  
14 Type 2 diabetes mellitus with ulcer  
15 Type 2 diabetes mellitus with ulcer  
16 Type 2 diabetes mellitus without complication  
17 Type 2 diabetes mellitus without complication  
18 Type 2 diabetic dietary review  
19 Type II diabetes mellitus  
20 Type II diabetes mellitus  
21 Type II diabetes mellitus - poor control  
22 Type II diabetes mellitus - poor control  
23 Type II diabetes mellitus - poor control  
24 Type II diabetes mellitus in remission  
25 Type II diabetes mellitus with arthropathy  
26 Type II diabetes mellitus with arthropathy  
27 Type II diabetes mellitus with arthropathy  
28 Type II diabetes mellitus with diabetic cataract  
29 Type II diabetes mellitus with diabetic cataract  
30 Type II diabetes mellitus with exudative maculopathy  
31 Type II diabetes mellitus with exudative maculopathy  
32 Type II diabetes mellitus with exudative maculopathy  
33 Type II diabetes mellitus with gangrene  
34 Type II diabetes mellitus with gangrene  
35 Type II diabetes mellitus with gastroparesis  
36 Type II diabetes mellitus with hypoglycaemic coma  
37 Type II diabetes mellitus with hypoglycaemic coma  
38 Type II diabetes mellitus with hypoglycaemic coma  
39 Type II diabetes mellitus with ketoacidosis  
40 Type II diabetes mellitus with ketoacidotic coma  
41 Type II diabetes mellitus with mononeuropathy  
42 Type II diabetes mellitus with mononeuropathy  
43 Type II diabetes mellitus with multiple complications  
44 Type II diabetes mellitus with multiple complications  
45 Type II diabetes mellitus with multiple complications  
46 Type II diabetes mellitus with nephropathy  
47 Type II diabetes mellitus with nephropathy  
48 Type II diabetes mellitus with nephropathy  
49 Type II diabetes mellitus with neurological complications  
50 Type II diabetes mellitus with neurological complications  
51 Type II diabetes mellitus with neurological complications  
52 Type II diabetes mellitus with neuropathic arthropathy  
53 Type II diabetes mellitus with neuropathic arthropathy  
54 Type II diabetes mellitus with neuropathic arthropathy  
55 Type II diabetes mellitus with ophthalmic complications  
56 Type II diabetes mellitus with ophthalmic complications  
57 Type II diabetes mellitus with ophthalmic complications  
58 Type II diabetes mellitus with peripheral angiopathy  
59 Type II diabetes mellitus with peripheral angiopathy  
60 Type II diabetes mellitus with persistent microalbuminuria

- 1
- 2 Type II diabetes mellitus with persistent proteinuria
- 3 Type II diabetes mellitus with polyneuropathy
- 4 Type II diabetes mellitus with polyneuropathy
- 5 Type II diabetes mellitus with renal complications
- 6 Type II diabetes mellitus with renal complications
- 7 Type II diabetes mellitus with renal complications
- 8 Type II diabetes mellitus with retinopathy
- 9 Type II diabetes mellitus with retinopathy
- 10 Type II diabetes mellitus with ulcer
- 11 Type II diabetes mellitus with ulcer
- 12 Type II diabetes mellitus without complication
- 13 Type II diabetes mellitus without complication
- 14 Type II diabetes mellitus without complication
- 15 Type II diabetic dietary review
- 16 Diabetes mellitus autosomal dominant type 2
- 17
- 18
- 19
- 20
- 21
- 22
- 23
- 24
- 25
- 26
- 27
- 28
- 29
- 30
- 31
- 32
- 33
- 34
- 35
- 36
- 37
- 38
- 39
- 40
- 41
- 42
- 43
- 44
- 45
- 46
- 47
- 48
- 49
- 50
- 51
- 52
- 53
- 54
- 55
- 56
- 57
- 58
- 59
- 60

For peer review only



1  
2  
3  
4  
5  
6  
7  
8  
9  
10  
11  
12  
13  
14  
15  
16  
17  
18  
19  
20  
21  
22  
23  
24  
25  
26  
27  
28  
29  
30  
31  
32  
33  
34  
35  
36  
37  
38  
39  
40  
41  
42  
43  
44  
45  
46  
47  
48  
49  
50  
51  
52  
53  
54  
55  
56  
57  
58  
59  
60

For peer review only

itus

|    | ICD-10 code | Category                                                                                           |
|----|-------------|----------------------------------------------------------------------------------------------------|
| 1  |             |                                                                                                    |
| 2  |             |                                                                                                    |
| 3  | E10.1       | Type 1 diabetes mellitus with coma                                                                 |
| 4  | E10.2       | Type 1 diabetes mellitus with ketoacidosis                                                         |
| 5  | E10.3       | Type 1 diabetes mellitus with renal complications                                                  |
| 6  |             |                                                                                                    |
| 7  | E10.4       | Type 1 diabetes mellitus with ophthalmic complications                                             |
| 8  | E10.5       | Type 1 diabetes mellitus with neurological complications                                           |
| 9  | E10.6       | Type 1 diabetes mellitus with peripheral circulatory complications                                 |
| 10 | E10.7       | Type 1 diabetes mellitus with other specific complications                                         |
| 11 | E10.8       | Type 1 diabetes mellitus with multiple complications                                               |
| 12 |             |                                                                                                    |
| 13 | E10.9       | Type 1 diabetes mellitus without complications                                                     |
| 14 | E11.1       | Type 2 diabetes mellitus with coma                                                                 |
| 15 | E11.2       | Type 2 diabetes mellitus with ketoacidosis                                                         |
| 16 | E11.3       | Type 2 diabetes mellitus with renal complications                                                  |
| 17 | E11.4       | Type 2 diabetes mellitus with ophthalmic complications                                             |
| 18 |             |                                                                                                    |
| 19 | E11.5       | Type 2 diabetes mellitus with neurological complications                                           |
| 20 | E11.6       | Type 2 diabetes mellitus with peripheral circulatory complications                                 |
| 21 | E11.7       | Type 2 diabetes mellitus with other specific complications                                         |
| 22 | E11.8       | Type 2 diabetes mellitus with multiple complications                                               |
| 23 |             |                                                                                                    |
| 24 | E11.9       | Type 2 diabetes mellitus without complications                                                     |
| 25 | E12.1       | Malnutrition-related diabetes mellitus diabetes mellitus with coma                                 |
| 26 | E12.2       | Malnutrition-related diabetes mellitus diabetes mellitus with ketoacidosis                         |
| 27 | E12.3       | Malnutrition-related diabetes mellitus diabetes mellitus with renal complications                  |
| 28 | E12.4       | Malnutrition-related diabetes mellitus diabetes mellitus with ophthalmic complications             |
| 29 |             |                                                                                                    |
| 30 | E12.5       | Malnutrition-related diabetes mellitus diabetes mellitus with neurological complications           |
| 31 | E12.6       | Malnutrition-related diabetes mellitus diabetes mellitus with peripheral circulatory complications |
| 32 | E12.7       | Malnutrition-related diabetes mellitus diabetes mellitus with other specific complications         |
| 33 | E12.8       | Malnutrition-related diabetes mellitus diabetes mellitus with multiple complications               |
| 34 | E12.9       | Malnutrition-related diabetes mellitus diabetes mellitus without complications                     |
| 35 |             |                                                                                                    |
| 36 | E13.1       | Other specified diabetes mellitus diabetes mellitus with coma                                      |
| 37 | E13.2       | Other specified diabetes mellitus diabetes mellitus with ketoacidosis                              |
| 38 | E13.3       | Other specified diabetes mellitus diabetes mellitus with renal complications                       |
| 39 | E13.4       | Other specified diabetes mellitus diabetes mellitus with ophthalmic complications                  |
| 40 | E13.5       | Other specified diabetes mellitus diabetes mellitus with neurological complications                |
| 41 | E13.6       | Other specified diabetes mellitus diabetes mellitus with peripheral circulatory complications      |
| 42 | E13.7       | Other specified diabetes mellitus diabetes mellitus with other specific complications              |
| 43 | E13.8       | Other specified diabetes mellitus diabetes mellitus with multiple complications                    |
| 44 | E13.9       | Other specified diabetes mellitus diabetes mellitus without complications                          |
| 45 |             |                                                                                                    |
| 46 | E14.1       | Unspecified diabetes mellitus diabetes mellitus with coma                                          |
| 47 | E14.2       | Unspecified diabetes mellitus diabetes mellitus with ketoacidosis                                  |
| 48 | E14.3       | Unspecified diabetes mellitus diabetes mellitus with renal complications                           |
| 49 | E14.4       | Unspecified diabetes mellitus diabetes mellitus with ophthalmic complications                      |
| 50 | E14.5       | Unspecified diabetes mellitus diabetes mellitus with neurological complications                    |
| 51 | E14.6       | Unspecified diabetes mellitus diabetes mellitus with peripheral circulatory complications          |
| 52 | E14.7       | Unspecified diabetes mellitus diabetes mellitus with other specific complications                  |
| 53 | E14.8       | Unspecified diabetes mellitus diabetes mellitus with multiple complications                        |
| 54 | E14.9       | Unspecified diabetes mellitus diabetes mellitus without complications                              |
| 55 |             |                                                                                                    |
| 56 |             |                                                                                                    |
| 57 |             |                                                                                                    |
| 58 |             |                                                                                                    |
| 59 |             |                                                                                                    |
| 60 |             |                                                                                                    |

1  
2  
3  
4  
5  
6  
7  
8  
9  
10  
11  
12  
13  
14  
15  
16  
17  
18  
19  
20  
21  
22  
23  
24  
25  
26  
27  
28  
29  
30  
31  
32  
33  
34  
35  
36  
37  
38  
39  
40  
41  
42  
43  
44  
45  
46  
47  
48  
49  
50  
51  
52  
53  
54  
55  
56  
57  
58  
59  
60

s

For peer review only

1  
2     Prodcodetid  
3     9851141000033117  
4     475141000033116  
5     548141000033117  
6     920741000033111  
7  
8     391341000033118  
9     1430841000033118  
10    395141000033118  
11    8614041000033119  
12    8614141000033115  
13    256041000033110  
14    586541000033115  
15    750241000033113  
16    255941000033117  
17    255241000033114  
18  
19    1608041000033116  
20    9850841000033118  
21    392041000033113  
22    256141000033114  
23    255141000033119  
24    391641000033114  
25    391741000033117  
26    391141000033116  
27    391541000033113  
28    391941000033119  
29    885441000033112  
30    474941000033115  
31    196141000033116  
32    1891841000033112  
33    395341000033115  
34    255741000033115  
35    391241000033111  
36    4907641000033116  
37    1891941000033116  
38    8963541000033110  
39    8963341000033115  
40    8963641000033111  
41    8963041000033117  
42    8962941000033110  
43    8963241000033113  
44    8963141000033118  
45    8963441000033114  
46    12198241000033110  
47    12198341000033117  
48    4259741000033112  
49    4259841000033119  
50    4157141000033115  
51    4157241000033110  
52    11695941000033111  
53    11696041000033118

For peer review only

1 8193041000033117  
2 8193241000033113  
3 8193341000033115  
4 8193141000033118  
5 4954641000033115  
6 4954741000033112  
7 3269141000033118  
8 3268841000033118  
9 3268941000033114  
10 3269041000033117  
11 2717041000033110  
12 2717141000033114  
13 3138941000033115  
14 3139041000033112  
15 8581041000033111  
16 8581241000033115  
17 8581341000033113  
18 8581141000033110  
19 8197241000033116  
20 3083841000033118  
21 3012541000033111  
22 947341000033112  
23 3083741000033111  
24 9851041000033116  
25 11800041000033110  
26 9850741000033111  
27 11807741000033112  
28 11800141000033114  
29 11799941000033116  
30 11800241000033119  
31 11807641000033115  
32 2271141000033116  
33 9158341000033117  
34 2270941000033113  
35 2270841000033117  
36 2271041000033115  
37 196041000033115  
38 6138541000033119  
39 196941000033119  
40 1035541000033115  
41 196841000033110  
42 10955641000033118  
43 10955741000033110  
44 12037141000033115  
45 3059241000033110  
46 3059341000033117  
47 148541000033118  
48 7860141000033114  
49 7860241000033119  
50 7860341000033112

For peer review only

1  
2 7860441000033118  
3 10642541000033111  
4 10642441000033110  
5 3152841000033114  
6 3152741000033116  
7  
8 825641000033117  
9 825741000033114  
10 248341000033110  
11 248441000033116  
12  
13 3097441000033111  
14 3872441000033118  
15 3872641000033116  
16 3872941000033111  
17 3872541000033117  
18  
19 12398041000033110  
20 274741000033119  
21 822741000033117  
22 4156641000033110  
23 4156541000033114  
24 12398141000033114  
25 3952941000033115  
26 3952841000033111  
27 10974641000033119  
28 10974541000033115  
29  
30 386541000033117  
31 535541000033117  
32 8200041000033113  
33 8199841000033110  
34 8199941000033119  
35 8200141000033112  
36 523041000033113  
37 395241000033113  
38 10217041000033110  
39 4156041000033116  
40 4156141000033117  
41 390241000033116  
42 390341000033114  
43 390141000033111  
44 2090341000033111  
45 3057441000033119  
46 3898641000033113  
47 12195941000033113  
48 3057341000033113  
49 12195841000033117  
50 2090241000033118  
51 3898541000033112  
52 2090041000033114  
53 2090141000033113  
54 8947641000033114  
55 8947541000033113

For peer review only

1 8947741000033117  
2 8947441000033112  
3 10388241000033111  
4 485641000033118  
5 10388341000033118  
6 421941000033118  
7 423841000033110  
8 4040741000033110  
9 3857341000033112  
10 333041000033113  
11 11693941000033112  
12 11694241000033118  
13 11694041000033114  
14 11694141000033113  
15 3994241000033113  
16 3994341000033115  
17 3994541000033110  
18 3994641000033111  
19 3994441000033114  
20 3994741000033119  
21 404741000033113  
22 404541000033117  
23 404641000033116  
24 8196341000033112  
25 8196241000033119  
26 4156941000033115  
27 4212641000033116  
28 4212741000033113  
29 4157041000033119  
30 9293441000033110  
31 474341000033119  
32 474441000033113  
33 6117341000033119  
34 1405941000033112  
35 10267341000033111  
36 9293541000033111  
37 6058941000033117  
38 10267541000033116  
39 5844941000033112  
40 5845241000033116  
41 6067041000033112  
42 6117141000033117  
43 1406041000033119  
44 6067141000033111  
45 6117241000033112  
46 10267441000033117  
47 5845041000033112  
48 5845141000033111  
49 4955741000033113  
50 4292641000033117

For peer review only

1  
2 4452841000033111  
3 4374741000033117  
4 2590141000033110  
5 4452741000033118  
6 2590041000033111  
7  
8 5845441000033115  
9 2590241000033115  
10 3964641000033114  
11 2589941000033118  
12 8838441000033117  
13 4374841000033110  
14 2038241000033112  
15 2212841000033110  
16 7877941000033115  
17 7877841000033111  
18 11667741000033115  
19 11667641000033112  
20 11667541000033111  
21 11667441000033110  
22 2746241000033110  
23 3997641000033116  
24 1073541000033119  
25 2746341000033117  
26 531841000033117  
27 531741000033110  
28 529241000033119  
29 529041000033110  
30 1073641000033118  
31 1077441000033114  
32 1073741000033110  
33 1077341000033115  
34 529341000033112  
35 6167441000033114  
36 6167541000033110  
37 3347941000033110  
38 3348041000033113  
39 3348241000033117  
40 3348141000033112  
41 540541000033112  
42 540641000033113  
43 2642041000033114  
44 547341000033118  
45 2642141000033113  
46 3983641000033110  
47 1506441000033117  
48 1506341000033111  
49 3983741000033118  
50 547541000033113  
51 4061141000033114  
52 4453741000033111

For peer review only



1 1607941000033119  
2 12188941000033117  
3 6470841000033117  
4 12189441000033117  
5 12188741000033115  
6 5292841000033112  
7 12189541000033116  
8 10334741000033117  
9 10334441000033112  
10 12189241000033118  
11 10334841000033110  
12 5292741000033119  
13 6471741000033117  
14 10334241000033111  
15 5292541000033110  
16 10334641000033114  
17 12189141000033113  
18 9118141000033112  
19 5292641000033111  
20 8233141000033111  
21 6471241000033111  
22 10334541000033113  
23 4374441000033112  
24 4374341000033118  
25 2258141000033111  
26 2258241000033116  
27 586441000033116  
28 579141000033110  
29 2799741000033116  
30 587041000033110  
31 2799841000033114  
32 2799641000033113  
33 2799541000033112  
34 587541000033117  
35 587141000033114  
36 5264741000033112  
37 5264641000033115  
38 11757341000033115  
39 630441000033119  
40 5976141000033112  
41 11665641000033118  
42 630641000033117  
43 11757541000033110  
44 11757441000033114  
45 11665541000033119  
46 5886241000033115  
47 630541000033118  
48 11757741000033119  
49 630341000033113  
50 11665441000033115

For peer review only

1  
2 11757641000033111  
3 7860541000033117  
4 7860641000033116  
5 3092941000033116  
6 728841000033110  
7  
8 10013741000033113  
9 10012941000033117  
10 749941000033114  
11 749841000033118  
12  
13 1548941000033115  
14 1547741000033117  
15 1547941000033119  
16 749441000033116  
17 1547841000033110  
18 749341000033110  
19  
20 1548841000033111  
21 749241000033117  
22 9703941000033112  
23 914141000033114  
24 750041000033117  
25 914041000033110  
26 750141000033118  
27 3050641000033118  
28 3050541000033119  
29 3177241000033114  
30 3177341000033116  
31 6428241000033115  
32 6428341000033113  
33 5355141000033111  
34 12185841000033116  
35 194941000033112  
36 4519141000033112  
37 775041000033114  
38 12185941000033112  
39 4519241000033117  
40 775141000033113  
41 194841000033116  
42 12330541000033110  
43 12330141000033118  
44 12330241000033113  
45 12330441000033114  
46 12330341000033115  
47 12330041000033117  
48 4522841000033118  
49 4522941000033114  
50 4188241000033115  
51 4187841000033117  
52 8839241000033114  
53 10494841000033114  
54 4187541000033119  
55  
56  
57  
58  
59  
60

For peer review only

1 4188141000033110  
2 8839141000033119  
3 10494541000033112  
4 4187641000033118  
5 10494741000033116  
6 4187741000033110  
7 4188041000033111  
8 4187941000033113  
9 10494641000033113  
10 10488241000033116  
11 11781741000033116  
12 11781841000033114  
13 10488341000033114  
14 10488541000033119  
15 10488441000033115  
16 841641000033116  
17 841741000033113  
18 903741000033112  
19 38541000033110  
20 38641000033111  
21 901641000033116  
22 2012141000033113  
23 2012241000033118  
24 899041000033116  
25 899141000033117  
26 1495241000033117  
27 4202841000033118  
28 4957041000033116  
29 1495141000033112  
30 4202941000033114  
31 913741000033110  
32 913841000033117  
33 913941000033113  
34 914441000033118  
35 2617241000033110  
36 915041000033111  
37 914941000033111  
38 2659941000033117  
39 3922341000033115  
40 3922241000033113  
41 2157041000033111  
42 3097241000033110  
43 3097341000033117  
44 2157141000033110  
45 3097141000033115  
46 2156941000033110  
47 11492541000033114  
48 11492141000033117  
49 4269341000033118  
50 4269441000033112

For peer review only

1  
2 4507541000033111  
3 4507641000033112  
4 10213141000033116  
5 10213241000033111  
6 10212841000033117  
7 10213041000033115  
8 10492141000033113  
9 10491841000033111  
10 10491941000033115  
11 10491741000033118  
12 10371941000033118  
13 10371741000033116  
14 12352841000033112  
15 12352741000033119  
16 12043541000033115  
17 12042941000033115  
18 11580041000033110  
19 11579841000033115  
20 11579741000033113  
21 11579941000033111  
22 4011441000033117  
23 1892041000033110  
24 3870741000033112  
25 4024741000033117  
26 3870641000033115  
27 3870841000033119  
28 4024841000033110  
29 4595041000033114  
30 1892141000033114  
31 4011541000033116  
32 3870941000033110  
33 1753741000033111  
34 1029541000033115  
35 3952141000033117  
36 1404241000033119  
37 3201541000033110  
38 3201641000033111  
39 1747941000033115  
40 7680641000033112  
41 4907741000033113  
42 11822741000033116  
43 11822841000033114  
44 11822941000033118  
45 11822541000033112  
46 11823041000033111  
47 11822641000033113  
48 3859041000033118  
49 3859141000033119  
50 4429441000033119  
51 4429341000033113

For peer review only

1 4806041000033116  
2 4806141000033117  
3 11275641000033114  
4 11275841000033110  
5 11275541000033113  
6 11275741000033117  
7 11275341000033118  
8 11275441000033112  
9 5833241000033118  
10 5832241000033113  
11 5832141000033118  
12 5832941000033116  
13 12292141000033119  
14 12292241000033114  
15 10599341000033111  
16 10599441000033117  
17 3217241000033119  
18 4806241000033112  
19 4806341000033119  
20 3217141000033114  
21 969841000033115  
22 1052641000033112  
23 8273941000033111  
24 8886841000033113  
25 8887041000033116  
26 8887141000033117  
27 8886941000033117  
28 3270341000033118  
29 2645141000033119  
30 2645241000033114  
31 3270241000033111  
32 1112241000033113  
33 1446641000033117  
34 1152341000033114  
35 10209441000033113  
36 10209641000033110  
37 10209741000033118  
38 10209541000033114  
39 1154241000033113  
40 8840041000033112  
41 8839941000033117  
42 8123841000033116  
43 8123941000033112  
44 8123641000033117  
45 8123541000033118  
46 8124041000033114  
47 8123741000033114  
48 3944041000033114  
49 3943941000033112  
50 3949941000033114

For peer review only

1  
2 3949841000033118  
3 3949741000033111  
4 3950241000033113  
5 3950041000033117  
6 3950141000033118  
7  
8 11420041000033110  
9 11420141000033114  
10 11419541000033118  
11 11419841000033116  
12  
13 2995041000033111  
14 2994941000033111  
15 5886641000033117  
16 1904741000033110  
17 1904841000033117  
18  
19 4326541000033119  
20 1904541000033119  
21 4326341000033114  
22 4326241000033116  
23 5886441000033119  
24 5886741000033114  
25 5886941000033112  
26 1904941000033113  
27 1905141000033112  
28 5886541000033118  
29 4326441000033115  
30 5886841000033116  
31 1905041000033113  
32 1904441000033115  
33 1904641000033118  
34 4803041000033114  
35 4803241000033118  
36 6455241000033110  
37 6455441000033111  
38 6455141000033115  
39 1430541000033115  
40 6455341000033117  
41 3102541000033119  
42 818041000033111  
43 11717441000033116  
44 11717541000033115  
45 11717741000033111  
46 11717641000033119  
47 9158941000033118  
48 1446841000033116  
49 6466841000033110  
50 4608241000033117  
51 4608141000033112  
52 4608441000033116  
53 2280341000033117  
54 9159041000033110  
55  
56  
57  
58  
59  
60

For peer review only

1 2280241000033110  
2 734641000033116  
3 8614541000033112  
4 4608341000033110  
5 10740541000033118  
6 10740241000033115  
7 10740441000033119  
8 10740341000033113  
9 2188541000033112  
10 2188441000033111  
11 9075041000033117  
12 9076141000033113  
13 9074941000033117  
14 9076041000033114  
15 1460341000033118  
16 1455041000033117  
17 2076541000033113  
18 1506241000033118  
19 1454941000033117  
20 7739541000033119  
21 7739741000033110  
22 7739841000033117  
23 7739641000033118  
24 6529941000033113  
25 6530041000033117  
26 11940041000033110  
27 11940241000033119  
28 11939841000033111  
29 11939941000033115  
30 11940141000033114  
31 11940341000033112  
32 1508741000033113  
33 3997441000033118  
34 3982941000033114  
35 3997541000033117  
36 1005441000033112  
37 1519641000033110  
38 504241000033114  
39 1518641000033118  
40 1518541000033119  
41 9104141000033115  
42 3347541000033116  
43 3347441000033117  
44 951841000033112  
45 3347741000033112  
46 9104041000033119  
47 3347641000033115  
48 951741000033119  
49 8560941000033116  
50 8561041000033114

For peer review only

1  
2 8561041000033114  
3  
4  
5  
6  
7  
8  
9  
10  
11  
12  
13  
14  
15  
16  
17  
18  
19  
20  
21  
22  
23  
24  
25  
26  
27  
28  
29  
30  
31  
32  
33  
34  
35  
36  
37  
38  
39  
40  
41  
42  
43  
44  
45  
46  
47  
48  
49  
50  
51  
52  
53  
54  
55  
56  
57  
58  
59  
60

For peer review only



## 1 Term

2  
3 Cometriq 20mg capsules and Cometriq 80mg capsules (Ipsen Ltd)  
4 Doxorubicin Hydrochloride Injection 50 mg  
5 Etoposide Injection 20 mg/ml  
6 Mitobronitol Tablets 125 mg  
7 Cytarabine Injection 500 mg vial  
8 Thiotepa(With Sodium Chloride And Bicarbonate) Injection 15mg vial  
9  
10 Cyclophosphamide Tablets 10 mg  
11 Docetaxel Solution For Infusion And Diluent 20 mg/2 ml vial  
12 Docetaxel Solution For Infusion And Diluent 80 mg/8 ml vial  
13 Cisplatin Injection 450 mg/vial  
14 Fludarabine Phosphate Injection 50 mg/vial  
15 Ifosfamide Injection 500 mg vial  
16 Cisplatin Injection 150 mg/vial  
17 Cisplatin Injection 500 micrograms/ml  
18 Etoposide Phosphate Injection 100 mg/vial  
19 Cabozantinib 20mg capsules and Cabozantinib 80mg capsules  
20 Cyclophosphamide Injection 1.07 g/vial  
21 Cisplatin Injection 1 mg/ml  
22 Cisplatin Injection 10 mg/vial  
23 Cyclophosphamide Injection 214 mg/vial  
24 Cyclophosphamide Injection 535 mg/vial  
25 Cytarabine Injection 100 mg/ml  
26 Cyclophosphamide Injection 107 mg/vial  
27 Cyclophosphamide Injection  
28 Melphalan Injection 100 mg vial  
29 Doxorubicin Hydrochloride Injection 10 mg  
30 Carmustine Injection 100 mg vial  
31 Oxaliplatin Powder For Solution For Injection 50 mg/vial  
32 Cyclophosphamide 50 Tablets 50 mg  
33 Cisplatin Injection 50 mg/vial  
34 Cytarabine Injection 20 mg/ml  
35 Paclitaxel Powder For Suspension For Infusion 100 mg vial  
36 Oxaliplatin Powder For Solution For Injection 100 mg/vial  
37 Giotrif 40mg tablets (Boehringer Ingelheim Ltd)  
38 Giotrif 20mg tablets (Boehringer Ingelheim Ltd)  
39 Giotrif 50mg tablets (Boehringer Ingelheim Ltd)  
40 Afatinib 30mg tablets  
41 Afatinib 20mg tablets  
42 Afatinib 50mg tablets  
43 Afatinib 40mg tablets  
44 Giotrif 30mg tablets (Boehringer Ingelheim Ltd)  
45 Alectinib 150mg capsules  
46 Alecensa 150mg capsules (Roche Products Ltd)  
47 Amsacrine 75mg/1.5ml solution for infusion ampoules and diluent  
48 Amsidine 75mg/1.5ml solution for infusion ampoules and diluent (Eurocept International bv)  
49 Arsenic 10mg/10ml solution for infusion ampoules  
50 Trisenox 10mg/10ml concentrate for solution for infusion ampoules (Teva UK Ltd)  
51 Asparaginase 10,000unit powder for solution for infusion vials  
52 Spectrila 10,000unit powder for concentrate for solution for infusion vials (medac UK)  
53  
54  
55  
56  
57  
58  
59  
60

1 Axitinib 1mg tablets  
2 Inlyta 1mg tablets (Pfizer Ltd)  
3 Inlyta 5mg tablets (Pfizer Ltd)  
4 Axitinib 5mg tablets  
5 Azacitidine 100mg powder for suspension for injection vials  
6 Vidaza 100mg powder for suspension for injection vials (Celgene Ltd)  
7 Avastin 400mg/16ml solution for infusion vials (Roche Products Ltd)  
8 Bevacizumab 100mg/4ml solution for infusion vials  
9 Bevacizumab 400mg/16ml solution for infusion vials  
10 Avastin 100mg/4ml solution for infusion vials (Roche Products Ltd)  
11 Bexarotene 75mg capsules  
12 Targretin 75mg capsules (Eisai Ltd)  
13 Bortezomib 3.5mg powder for solution for injection vials  
14 Velcade 3.5mg powder for solution for injection vials (Janssen-Cilag Ltd)  
15 Bosutinib 100mg tablets  
16 Bosulif 500mg tablets (Pfizer Ltd)  
17 Bosulif 100mg tablets (Pfizer Ltd)  
18 Bosutinib 500mg tablets  
19 Adcetris 50mg powder for concentrate for solution for infusion vials (Takeda UK Ltd)  
20 Busulfan 60mg/10ml solution for infusion ampoules  
21 Busilvex 60mg/10ml concentrate for solution for infusion ampoules (Pierre Fabre Ltd)  
22 Myleran 2mg tablets (Aspen Pharma Trading Ltd)  
23 Busulfan 2mg tablets  
24 Cometriq 20mg capsules (Ipsen Ltd)  
25 Cabozantinib 40mg tablets  
26 Cabozantinib 20mg capsules  
27 Cabometyx 60mg tablets (Ipsen Ltd)  
28 Cabometyx 20mg tablets (Ipsen Ltd)  
29 Cabozantinib 20mg tablets  
30 Cabometyx 40mg tablets (Ipsen Ltd)  
31 Cabozantinib 60mg tablets  
32 Xeloda 500mg tablets (Roche Products Ltd)  
33 Capecitabine 300mg tablets  
34 Capecitabine 500mg tablets  
35 Capecitabine 150mg tablets  
36 Xeloda 150mg tablets (Roche Products Ltd)  
37 Carboplatin 150mg/15ml solution for infusion vials  
38 Carboplatin 600mg/60ml solution for infusion vials  
39 Carboplatin 50mg/5ml solution for infusion vials  
40 Paraplatin 50mg/5ml solution for infusion vials (Bristol-Myers Squibb Pharmaceuticals Ltd)  
41 Carboplatin 450mg/45ml solution for infusion vials  
42 Carfilzomib 60mg powder for solution for infusion vials  
43 Kyprolis 60mg powder for solution for infusion vials (Amgen Ltd)  
44 Carmustine 100mg powder and solvent for solution for injection vials  
45 Carmustine 7.7mg implant  
46 Gliadel 7.7mg implant (Eisai Ltd)  
47 BiCNU 100mg powder and solvent for solution for infusion vials (Bristol-Myers Squibb Pharmaceuticals Ltd)  
48 Catumaxomab 10micrograms/0.1ml solution for infusion pre-filled syringes  
49 Catumaxomab 50micrograms/0.5ml solution for infusion pre-filled syringes  
50 Removab 10micrograms/0.1ml concentrate for solution for infusion pre-filled syringes (Neovii Biotech GmbH)

1  
2 Removab 50micrograms/0.5ml concentrate for solution for infusion pre-filled syringes (Neovii Biotech GmbH)  
3 Zykadia 150mg capsules (Novartis Pharmaceuticals UK Ltd)  
4 Ceritinib 150mg capsules  
5 Erbitux 100mg/50ml solution for infusion vials (Merck Serono Ltd)  
6 Cetuximab 100mg/50ml solution for infusion vials  
7 Leukeran 2mg tablets (Aspen Pharma Trading Ltd)  
8 Leukeran 5mg tablets (GlaxoSmithKline UK Ltd)  
9 Chlorambucil 2mg tablets  
10 Chlorambucil 5mg tablets  
11 Chlormethine 10mg solution for injection vials  
12 Cisplatin 50mg powder for solution for infusion vials  
13 Cisplatin 100mg/100ml solution for infusion vials  
14 Cisplatin 10mg/10ml solution for infusion vials  
15 Cisplatin 50mg/50ml solution for infusion vials  
16 Cladribine 10mg tablets  
17 Cladribine 10mg/10ml solution for infusion vials  
18 Leustat 10mg/10ml solution for infusion vials (Janssen-Cilag Ltd)  
19 Litak 10mg/5ml solution for injection vials (Lipomed GmbH)  
20 Cladribine 10mg/5ml solution for injection vials  
21 Mavencic 10mg tablets (Merck Serono Ltd)  
22 Evoltra 20mg/20ml concentrate for solution for infusion vials (Sanofi)  
23 Clofarabine 20mg/20ml solution for infusion vials  
24 Cotellic 20mg tablets (Roche Products Ltd)  
25 Cobimetinib 20mg tablets  
26 Crisantaspase 10,000unit powder for solution for injection vials  
27 Erwinase 10,000unit powder for solution for injection vials (EUSA Pharma Ltd)  
28 Xalkori 200mg capsules (Pfizer Ltd)  
29 Crizotinib 200mg capsules  
30 Crizotinib 250mg capsules  
31 Xalkori 250mg capsules (Pfizer Ltd)  
32 Endoxana 50mg tablets (Baxter Healthcare Ltd)  
33 Cyclophosphamide 50mg tablets  
34 Cyclophosphamide 2g powder for solution for injection vials  
35 Endoxana 500mg powder for solution for injection vials (Baxter Healthcare Ltd)  
36 Endoxana 1g powder for solution for injection vials (Baxter Healthcare Ltd)  
37 Cyclophosphamide 200mg powder for solution for injection vials  
38 Cyclophosphamide 500mg powder for solution for injection vials  
39 Cyclophosphamide 1g powder for solution for injection vials  
40 Cytarabine 2g/20ml solution for injection vials  
41 DepoCyt 50mg/5ml suspension for injection vials (Napp Pharmaceuticals Ltd)  
42 Cytarabine 500mg/5ml solution for injection vials  
43 Cytarabine 5g/50ml solution for infusion vials  
44 Cytarabine (liposomal) 50mg/5ml suspension for injection vials  
45 Cytarabine 4g/40ml solution for injection vials  
46 Cytarabine 1g/10ml solution for injection vials  
47 Cytarabine 100mg/1ml solution for injection vials  
48 Cytarabine 100mg/5ml solution for injection vials  
49 Cytarabine 500mg/25ml solution for injection vials  
50 Tafinlar 50mg capsules (Novartis Pharmaceuticals UK Ltd)  
51 Dabrafenib 75mg capsules

1 Tafinlar 75mg capsules (Novartis Pharmaceuticals UK Ltd)  
2 Dabrafenib 50mg capsules  
3 Dacarbazine 1g powder for solution for infusion vials  
4 DTIC-Dome 200mg powder for solution for injection vials (Bayer Plc)  
5 Dacarbazine 500mg powder for solution for infusion vials  
6 Dacarbazine 100mg powder for solution for injection vials  
7 Dacarbazine 200mg powder for solution for injection vials  
8 Dacarbazine 600mg powder for solution for infusion vials  
9 Dactinomycin 500microgram powder for solution for injection vials  
10 Cosmegen Lyovac 500microgram powder for solution for injection vials (Orphan Europe (UK) Ltd)  
11 Daratumumab 100mg/5ml solution for infusion vials  
12 Darzalex 400mg/20ml concentrate for solution for infusion vials (Janssen-Cilag Ltd)  
13 Daratumumab 400mg/20ml solution for infusion vials  
14 Darzalex 100mg/5ml concentrate for solution for infusion vials (Janssen-Cilag Ltd)  
15 Dasatinib 20mg tablets  
16 Dasatinib 50mg tablets  
17 Sprycel 20mg tablets (Bristol-Myers Squibb Pharmaceuticals Ltd)  
18 Sprycel 50mg tablets (Bristol-Myers Squibb Pharmaceuticals Ltd)  
19 Dasatinib 70mg tablets  
20 Sprycel 70mg tablets (Bristol-Myers Squibb Pharmaceuticals Ltd)  
21 Daunorubicin 20mg powder for solution for infusion vials  
22 DaunoXome 50mg emulsion for infusion vials (Galen Ltd)  
23 Daunorubicin (liposomal) 50mg emulsion for infusion vials  
24 Dacogen 50mg powder for concentrate for solution for infusion vials (Janssen-Cilag Ltd)  
25 Decitabine 50mg powder for solution for infusion vials  
26 Dexrazoxane 500mg powder and solvent for solution for infusion vials  
27 Dexrazoxane 500mg powder for solution for infusion vials  
28 Cardioxane 500mg powder for solution for infusion vials (Clinigen Healthcare Ltd)  
29 Savene 500mg powder for concentrate and solvent for solution for infusion vials (Clinigen Healthcare Ltd)  
30 Docetaxel 20mg/0.72ml solution for infusion vials and diluent  
31 Docetaxel 20mg/0.5ml solution for infusion vials and diluent  
32 Docetaxel 80mg/2ml solution for infusion vials and diluent  
33 Taxceus 80mg/4ml concentrate for solution for infusion vials (medac UK)  
34 Taxotere 20mg/0.5ml solution for infusion vials and diluent (Sanofi)  
35 Docetaxel 160mg/16ml solution for infusion vials  
36 Docetaxel 80mg/2.88ml solution for infusion vials and diluent  
37 Docetaxel 140mg/7ml solution for infusion vials  
38 Docetaxel 20mg/2ml solution for infusion vials  
39 Docetaxel 20mg/1ml solution for infusion vials  
40 Taxotere 80mg/4ml concentrate for solution for infusion vials (Sanofi)  
41 Docetaxel 160mg/8ml solution for infusion vials  
42 Taxceus 140mg/7ml concentrate for solution for infusion vials (medac UK)  
43 Taxotere 80mg/2ml solution for infusion vials and diluent (Sanofi)  
44 Taxotere 160mg/8ml concentrate for solution for infusion vials (Sanofi)  
45 Taxceus 20mg/1ml concentrate for solution for infusion vials (medac UK)  
46 Docetaxel 80mg/8ml solution for infusion vials  
47 Docetaxel 80mg/4ml solution for infusion vials  
48 Taxotere 20mg/1ml concentrate for solution for infusion vials (Sanofi)  
49 Doxorubicin 200mg/100ml solution for infusion vials  
50 Doxorubicin (liposomal) 50mg powder and solvent for suspension for infusion vials

1 Doxorubicin 50mg/25ml solution for injection Cytosafe vials (Pfizer Ltd)  
2 Doxorubicin 10mg powder for solution for injection vials  
3 Doxorubicin 10mg/5ml solution for injection vials  
4 Doxorubicin 10mg/5ml solution for injection Cytosafe vials (Pfizer Ltd)  
5 Doxorubicin Rapid Dissolution 50mg powder for solution for injection vials (Pfizer Ltd)  
6 Doxorubicin 200mg/100ml solution for injection Cytosafe vials (Pfizer Ltd)  
7 Doxorubicin 50mg/25ml solution for injection vials  
8 Myocet 50mg powder and solvent for suspension for infusion vials (Teva UK Ltd)  
9 Doxorubicin Rapid Dissolution 10mg powder for solution for injection vials (Pfizer Ltd)  
10 Doxorubicin 50mg powder for solution for injection vials (medac UK)  
11 Doxorubicin 50mg powder for solution for injection vials  
12 Caelyx 20mg/10ml concentrate for solution for infusion vials (Janssen-Cilag Ltd)  
13 Caelyx 50mg/25ml concentrate for solution for infusion vials (Janssen-Cilag Ltd)  
14 Doxorubicin liposomal pegylated 50mg/25ml solution for infusion vials  
15 Doxorubicin liposomal pegylated 20mg/10ml solution for infusion vials  
16 Empliciti 400mg powder for concentrate for solution for infusion vials (Bristol-Myers Squibb Pharmaceuticals L  
17 Empliciti 300mg powder for concentrate for solution for infusion vials (Bristol-Myers Squibb Pharmaceuticals L  
18 Elotuzumab 400mg powder for solution for infusion vials  
19 Elotuzumab 300mg powder for solution for infusion vials  
20 Pharmorubicin 200mg/100ml solution for infusion Cytosafe vials (Pfizer Ltd)  
21 Epirubicin 100mg/50ml solution for infusion vials  
22 Pharmorubicin Rapid Dissolution 10mg powder for solution for injection vials (Pfizer Ltd)  
23 Epirubicin 200mg/100ml solution for infusion vials  
24 Epirubicin 50mg/25ml solution for injection vials  
25 Epirubicin 10mg/5ml solution for injection vials  
26 Epirubicin 20mg powder for solution for injection vials  
27 Epirubicin 10mg powder for solution for injection vials  
28 Pharmorubicin Rapid Dissolution 20mg powder for solution for injection vials (Pfizer Ltd)  
29 Pharmorubicin 50mg/25ml solution for injection Cytosafe vials (Pfizer Ltd)  
30 Pharmorubicin Rapid Dissolution 50mg powder for solution for injection vials (Pfizer Ltd)  
31 Pharmorubicin 10mg/5ml solution for injection Cytosafe vials (Pfizer Ltd)  
32 Epirubicin 50mg powder for solution for injection vials  
33 Eribulin 880micrograms/2ml solution for injection vials  
34 Halaven 0.88mg/2ml solution for injection vials (Eisai Ltd)  
35 Erlotinib 100mg tablets  
36 Erlotinib 150mg tablets  
37 Tarceva 150mg tablets (Roche Products Ltd)  
38 Tarceva 100mg tablets (Roche Products Ltd)  
39 Estracyt 140mg capsules (Pfizer Ltd)  
40 Estramustine 140mg capsules  
41 Eposin 100mg/5ml concentrate for solution for infusion vials (medac UK)  
42 Etoposide 100mg capsules  
43 Eposin 500mg/25ml concentrate for solution for infusion vials (medac UK)  
44 Etoposide 100mg/5ml solution for infusion vials  
45 Vepesid 50mg capsules (Bristol-Myers Squibb Pharmaceuticals Ltd)  
46 Vepesid 100mg capsules (Bristol-Myers Squibb Pharmaceuticals Ltd)  
47 Etoposide 500mg/25ml solution for infusion vials  
48 Etoposide 50mg capsules  
49 Vepesid 100mg/5ml solution for infusion vials (Bristol-Myers Squibb Pharmaceuticals Ltd)  
50 Etoposide 100mg powder for solution for injection vials

1 Etopophos 100mg powder for solution for injection vials (Bristol-Myers Squibb Pharmaceuticals Ltd)  
2 Everolimus 3mg dispersible tablets sugar free  
3 Everolimus 2.5mg tablets  
4 Votubia 3mg dispersible tablets (Novartis Pharmaceuticals UK Ltd)  
5 Everolimus 2mg dispersible tablets sugar free  
6 Afinitor 10mg tablets (Novartis Pharmaceuticals UK Ltd)  
7 Votubia 5mg dispersible tablets (Novartis Pharmaceuticals UK Ltd)  
8 Certican 0.5mg tablets (Novartis Pharmaceuticals UK Ltd)  
9 Everolimus 250microgram tablets  
10 Votubia 2mg dispersible tablets (Novartis Pharmaceuticals UK Ltd)  
11 Certican 0.75mg tablets (Novartis Pharmaceuticals UK Ltd)  
12 Afinitor 5mg tablets (Novartis Pharmaceuticals UK Ltd)  
13 Votubia 5mg tablets (Novartis Pharmaceuticals UK Ltd)  
14 Everolimus 500microgram tablets  
15 Everolimus 5mg tablets  
16 Certican 0.25mg tablets (Novartis Pharmaceuticals UK Ltd)  
17 Everolimus 5mg dispersible tablets sugar free  
18 Afinitor 2.5mg tablets (Novartis Pharmaceuticals UK Ltd)  
19 Everolimus 10mg tablets  
20 Votubia 10mg tablets (Novartis Pharmaceuticals UK Ltd)  
21 Votubia 2.5mg tablets (Novartis Pharmaceuticals UK Ltd)  
22 Everolimus 750microgram tablets  
23 Fludarabine phosphate 50mg/2ml solution for injection vials  
24 Fludarabine phosphate 50mg powder for solution for injection vials  
25 Fludarabine phosphate 10mg tablets  
26 Fludara 10mg tablets (Sanofi)  
27 Fludara 50mg powder for solution for injection vials (Sanofi)  
28 Fluorouracil 250mg capsules  
29 Fluorouracil 2.5g/50ml solution for infusion vials  
30 Fluorouracil 2.5g/100ml solution for infusion vials  
31 Fluorouracil 5g/100ml solution for infusion vials  
32 Fluorouracil 1g/20ml solution for injection vials  
33 Fluorouracil 500mg/10ml solution for injection vials  
34 Fluorouracil 250mg/10ml solution for injection vials  
35 Fluorouracil 500mg/20ml solution for injection vials  
36 Iressa 250mg tablets (AstraZeneca UK Ltd)  
37 Gefitinib 250mg tablets  
38 Gemcitabine 1.2g/120ml infusion bags  
39 Gemzar 200mg powder for solution for infusion vials (Eli Lilly and Company Ltd)  
40 Gemcitabine 2g powder for solution for infusion vials  
41 Gemcitabine 200mg/5ml solution for infusion vials  
42 Gemcitabine 200mg powder for solution for infusion vials  
43 Gemcitabine 1.8g/180ml infusion bags  
44 Gemcitabine 1.6g/160ml infusion bags  
45 Gemcitabine 2g/50ml solution for infusion vials  
46 Gemcitabine 1.5g powder for solution for infusion vials  
47 Gemcitabine 1g powder for solution for infusion vials  
48 Gemcitabine 2.2g/220ml infusion bags  
49 Gemzar 1g powder for solution for infusion vials (Eli Lilly and Company Ltd)  
50 Gemcitabine 1g/25ml solution for infusion vials



1 Gemcitabine 2g/200ml infusion bags  
2  
3 Teysuno 15mg/4.35mg/11.8mg capsules (Nordic Pharma Ltd)  
4 Teysuno 20mg/5.8mg/15.8mg capsules (Nordic Pharma Ltd)  
5 Hydroxycarbamide 500mg capsules  
6 Hydrea 500mg capsules (Bristol-Myers Squibb Pharmaceuticals Ltd)  
7 Imbruvica 140mg capsules (Janssen-Cilag Ltd)  
8 Ibrutinib 140mg capsules  
9  
10 Idarubicin 5mg powder for solution for injection vials  
11 Idarubicin 10mg powder for solution for injection vials  
12 Zavedos 10mg powder for solution for injection vials (Pfizer Ltd)  
13 Zavedos 10mg capsules (Pfizer Ltd)  
14 Zavedos 5mg capsules (Pfizer Ltd)  
15 Idarubicin 5mg capsules  
16 Zavedos 25mg capsules (Pfizer Ltd)  
17 Idarubicin 25mg capsules  
18 Zavedos 5mg powder for solution for injection vials (Pfizer Ltd)  
19 Idarubicin 10mg capsules  
20 Zydelig 150mg tablets (Gilead Sciences International Ltd)  
21 Mitoxana 2g powder for solution for injection vials (Baxter Healthcare Ltd)  
22 Ifosfamide 1g powder for solution for injection vials  
23 Mitoxana 1g powder for solution for injection vials (Baxter Healthcare Ltd)  
24 Ifosfamide 2g powder for solution for injection vials  
25 Glivec 400mg tablets (Novartis Pharmaceuticals UK Ltd)  
26 Imatinib 400mg tablets  
27 Imatinib 100mg tablets  
28 Glivec 100mg tablets (Novartis Pharmaceuticals UK Ltd)  
29 Yervoy 200mg/40ml concentrate for solution for infusion vials (Bristol-Myers Squibb Pharmaceuticals Ltd)  
30 Yervoy 50mg/10ml concentrate for solution for infusion vials (Bristol-Myers Squibb Pharmaceuticals Ltd)  
31 Irinotecan 500mg/25ml solution for infusion vials  
32 Irinotecan 50mg/10ml solution for infusion vials  
33 Campto 100mg/5ml concentrate for solution for infusion vials (Pfizer Ltd)  
34 Irinotecan 300mg/15ml solution for infusion vials  
35 Irinotecan 40mg/2ml solution for infusion vials  
36 Onivyde 50mg/10ml concentrate for solution for infusion vials (Baxalta UK Ltd)  
37 Campto 300mg/15ml concentrate for solution for infusion vials (Pfizer Ltd)  
38 Irinotecan 100mg/5ml solution for infusion vials  
39 Campto 40mg/2ml concentrate for solution for infusion vials (Pfizer Ltd)  
40 Ninlaro 4mg capsules (Takeda UK Ltd)  
41 Ixazomib 3mg capsules  
42 Ixazomib 4mg capsules  
43 Ninlaro 3mg capsules (Takeda UK Ltd)  
44 Ninlaro 2.3mg capsules (Takeda UK Ltd)  
45 Ixazomib 2.3mg capsules  
46 Lapatinib 250mg tablets  
47 Tyverb 250mg tablets (Novartis Pharmaceuticals UK Ltd)  
48 Revlimid 25mg capsules (Celgene Ltd)  
49 Lenalidomide 25mg capsules  
50 Revlimid 2.5mg capsules (Celgene Ltd)  
51 Revlimid 20mg capsules (Celgene Ltd)  
52 Lenalidomide 5mg capsules

1  
2 Revlimid 15mg capsules (Celgene Ltd)  
3 Lenalidomide 2.5mg capsules  
4 Lenalidomide 7.5mg capsules  
5 Lenalidomide 10mg capsules  
6 Lenalidomide 20mg capsules  
7 Lenalidomide 15mg capsules  
8 Revlimid 10mg capsules (Celgene Ltd)  
9 Revlimid 5mg capsules (Celgene Ltd)  
10 Revlimid 7.5mg capsules (Celgene Ltd)  
11 Lenvatinib 4mg capsules  
12 Kispalyx 10mg capsules (Eisai Ltd)  
13 Kispalyx 4mg capsules (Eisai Ltd)  
14 Lenvima 4mg capsules (Eisai Ltd)  
15 Lenvima 10mg capsules (Eisai Ltd)  
16 Lenvatinib 10mg capsules  
17 Lomustine 10mg capsules  
18 Lomustine 40mg capsules  
19 Melphalan 5mg tablets  
20 Alkeran 2mg tablets (Aspen Pharma Trading Ltd)  
21 Alkeran 5mg tablets (GlaxoSmithKline UK Ltd)  
22 Melphalan 2mg tablets  
23 Melphalan 50mg powder and solvent for solution for injection vials  
24 Alkeran 50mg powder and solvent for solution for injection vials (Aspen Pharma Trading Ltd)  
25 Mesna 400mg tablets  
26 Mesna 600mg tablets  
27 Uromitexan 600mg tablets (Baxter Healthcare Ltd)  
28 Mesna 400mg/4ml solution for injection ampoules  
29 Mesna 1g/10ml solution for injection ampoules  
30 Uromitexan 400mg tablets (Baxter Healthcare Ltd)  
31 Uromitexan 400mg/4ml solution for injection ampoules (Baxter Healthcare Ltd)  
32 Mitomycin-C Kyowa 10mg powder for solution for injection vials (Kyowa Kirin Ltd)  
33 Mitomycin-C Kyowa 2mg powder for solution for injection vials (Kyowa Kirin Ltd)  
34 Mitomycin-C Kyowa 20mg powder for solution for injection vials (Kyowa Kirin Ltd)  
35 Mitomycin 10mg powder for solution for injection vials  
36 Mitomycin-C Kyowa 40mg powder for solution for injection vials (Kyowa Kirin Ltd)  
37 Mitomycin 20mg powder for solution for injection vials  
38 Mitomycin 2mg powder for solution for injection vials  
39 Mitomycin 40mg powder for solution for injection vials  
40 Lysodren 500mg tablets (HRA Pharma UK Ltd)  
41 Mitotane 500mg tablets  
42 Onkotrone 25mg/12.5ml solution for infusion vials (Baxter Healthcare Ltd)  
43 Mitoxantrone 25mg/12.5ml solution for infusion vials  
44 Mitoxantrone 30mg/15ml solution for infusion vials  
45 Onkotrone 30mg/15ml solution for infusion vials (ASTA Medica Ltd)  
46 Mitoxantrone 20mg/10ml solution for infusion vials  
47 Onkotrone 20mg/10ml solution for infusion vials (Baxter Healthcare Ltd)  
48 Portrazza 800mg/50ml concentrate for solution for infusion vials (Eli Lilly and Company Ltd)  
49 Nectinumab 800mg/50ml solution for infusion vials  
50 Nelarabine 250mg/50ml solution for infusion vials  
51 Atriance 250mg/50ml solution for infusion vials (Novartis Pharmaceuticals UK Ltd)  
52  
53  
54  
55  
56  
57  
58  
59  
60



1 Nilotinib 200mg capsules  
2 Tasigna 200mg capsules (Novartis Pharmaceuticals UK Ltd)  
3 Vargatef 100mg capsules (Boehringer Ingelheim Ltd)  
4 Vargatef 150mg capsules (Boehringer Ingelheim Ltd)  
5 Nintedanib 100mg capsules  
6 Nintedanib 150mg capsules  
7 Opdivo 40mg/4ml concentrate for solution for infusion vials (Bristol-Myers Squibb Pharmaceuticals Ltd)  
8 Nivolumab 40mg/4ml solution for infusion vials  
9 Opdivo 100mg/10ml concentrate for solution for infusion vials (Bristol-Myers Squibb Pharmaceuticals Ltd)  
10 Nivolumab 100mg/10ml solution for infusion vials  
11 Lynparza 50mg capsules (AstraZeneca UK Ltd)  
12 Olaparib 50mg capsules  
13 Lartruvo 190mg/19ml concentrate for solution for infusion vials (Eli Lilly and Company Ltd)  
14 Olaratumab 190mg/19ml solution for infusion vials  
15 Lartruvo 500mg/50ml concentrate for solution for infusion vials (Eli Lilly and Company Ltd)  
16 Olaratumab 500mg/50ml solution for infusion vials  
17 Tagrisso 80mg tablets (AstraZeneca UK Ltd)  
18 Osimertinib 80mg tablets  
19 Osimertinib 40mg tablets  
20 Tagrisso 40mg tablets (AstraZeneca UK Ltd)  
21 Eloxatin 200mg/40ml concentrate for solution for infusion vials (Sanofi)  
22 Eloxatin 50mg powder for solution for infusion vials (Sanofi)  
23 Oxaliplatin 100mg/20ml solution for infusion vials  
24 Oxaliplatin 50mg powder for solution for infusion vials  
25 Oxaliplatin 50mg/10ml solution for infusion vials  
26 Eloxatin 50mg/10ml concentrate for solution for infusion vials (Sanofi)  
27 Oxaliplatin 100mg powder for solution for infusion vials  
28 Oxaliplatin 150mg powder for solution for infusion vials  
29 Eloxatin 100mg powder for solution for infusion vials (Sanofi)  
30 Oxaliplatin 200mg/40ml solution for infusion vials  
31 Eloxatin 100mg/20ml concentrate for solution for infusion vials (Sanofi)  
32 Taxol 100mg/16.7ml solution for infusion vials (Bristol-Myers Squibb Pharmaceuticals Ltd)  
33 Paclitaxel 30mg/5ml solution for infusion vials  
34 Paclitaxel 300mg/50ml solution for infusion vials  
35 Taxol 30mg/5ml solution for infusion vials (Bristol-Myers Squibb Pharmaceuticals Ltd)  
36 Paclitaxel 150mg/25ml solution for infusion vials  
37 Taxol 150mg/25ml solution for infusion vials (Bristol-Myers Squibb Pharmaceuticals Ltd)  
38 Paclitaxel 100mg/16.7ml solution for infusion vials  
39 Paclitaxel albumin 100mg powder for suspension for infusion vials  
40 Abraxane 100mg powder for suspension for infusion vials (Celgene Ltd)  
41 Palbociclib 125mg capsules  
42 Ibrance 75mg capsules (Pfizer Ltd)  
43 Ibrance 100mg capsules (Pfizer Ltd)  
44 Palbociclib 75mg capsules  
45 Ibrance 125mg capsules (Pfizer Ltd)  
46 Palbociclib 100mg capsules  
47 Palifermin 6.25mg powder for solution for injection vials  
48 Kepivance 6.25mg powder for solution for injection vials (Swedish Orphan Biovitrum Ltd)  
49 Vectibix 100mg/5ml concentrate for solution for infusion vials (Amgen Ltd)  
50 Panitumumab 100mg/5ml solution for infusion vials

1 Panitumumab 400mg/20ml solution for infusion vials  
2 Vectibix 400mg/20ml concentrate for solution for infusion vials (Amgen Ltd)  
3 Farydak 10mg capsules (Novartis Pharmaceuticals UK Ltd)  
4 Farydak 20mg capsules (Novartis Pharmaceuticals UK Ltd)  
5 Panobinostat 20mg capsules  
6 Farydak 15mg capsules (Novartis Pharmaceuticals UK Ltd)  
7 Panobinostat 10mg capsules  
8 Panobinostat 15mg capsules  
9 Votrient 400mg tablets (Novartis Pharmaceuticals UK Ltd)  
10 Pazopanib 400mg tablets  
11 Pazopanib 200mg tablets  
12 Votrient 200mg tablets (Novartis Pharmaceuticals UK Ltd)  
13 Pegaspargase 3,750units/5ml solution for injection vials  
14 Oncaspar 3,750units/5ml solution for injection vials (Imported (United States))  
15 Pembrolizumab 50mg powder for solution for infusion vials  
16 Keytruda 50mg powder for concentrate for solution for infusion vials (Merck Sharp & Dohme Ltd)  
17 Alimta 500mg powder for concentrate for solution for infusion vials (Eli Lilly and Company Ltd)  
18 Pemetrexed 100mg powder for solution for infusion vials  
19 Alimta 100mg powder for concentrate for solution for infusion vials (Eli Lilly and Company Ltd)  
20 Pemetrexed 500mg powder for solution for infusion vials  
21 Nipent 10mg powder for solution for injection vials (Hospira UK Ltd)  
22 Pentostatin 10mg powder for solution for injection vials  
23 Perjeta 420mg/14ml concentrate for solution for infusion vials (Roche Products Ltd)  
24 Ponatinib 15mg tablets  
25 Iclusig 15mg tablets (Incyte Biosciences UK Ltd)  
26 Iclusig 45mg tablets (Incyte Biosciences UK Ltd)  
27 Ponatinib 45mg tablets  
28 Porfimer sodium 75mg powder for solution for injection vials  
29 Photofrin 15mg powder for solution for injection vials (Axcen Pharma Inc)  
30 Photofrin 75mg powder for solution for injection vials (Pinnacle Biologics BV)  
31 Porfimer sodium 15mg powder for solution for injection vials  
32 Procarbazine 50mg capsules  
33 Tomudex 2mg powder for solution for infusion vials (Hospira UK Ltd)  
34 Raltitrexed 2mg powder for solution for infusion vials  
35 Ramucirumab 100mg/10ml solution for infusion vials  
36 Cyramza 100mg/10ml concentrate for solution for infusion vials (Eli Lilly and Company Ltd)  
37 Cyramza 500mg/50ml concentrate for solution for infusion vials (Eli Lilly and Company Ltd)  
38 Ramucirumab 500mg/50ml solution for infusion vials  
39 Razoxane 125mg tablets  
40 Stivarga 40mg tablets (Bayer Plc)  
41 Regorafenib 40mg tablets  
42 Jakavi 5mg tablets (Novartis Pharmaceuticals UK Ltd)  
43 Jakavi 15mg tablets (Novartis Pharmaceuticals UK Ltd)  
44 Ruxolitinib 15mg tablets  
45 Ruxolitinib 5mg tablets  
46 Jakavi 20mg tablets (Novartis Pharmaceuticals UK Ltd)  
47 Ruxolitinib 20mg tablets  
48 Nexavar 200mg tablets (Bayer Plc)  
49 Sorafenib 200mg tablets  
50 Sunitinib 50mg capsules

1 Sunitinib 25mg capsules  
2 Sunitinib 12.5mg capsules  
3 Sutent 50mg capsules (Pfizer Ltd)  
4 Sutent 12.5mg capsules (Pfizer Ltd)  
5 Sutent 25mg capsules (Pfizer Ltd)  
6 Imlygic 1million plaque forming units/1ml solution for injection vials (Amgen Ltd)  
7 Imlygic 100million plaque forming units/1ml solution for injection vials (Amgen Ltd)  
8 Talimogene laherparepvec 1million plaque forming units/1ml solution for injection vials  
9 Talimogene laherparepvec 100million plaque forming units/1ml solution for injection vials  
10 Foscan 20mg/5ml solution for injection vials (Biotech Pharma Ltd)  
11 Temoporfin 20mg/5ml solution for injection vials  
12 Temomedac 100mg capsules (medac UK)  
13 Temozolomide 250mg capsules  
14 Temodal 5mg capsules (Merck Sharp & Dohme Ltd)  
15 Temodal 180mg capsules (Merck Sharp & Dohme Ltd)  
16 Temozolomide 20mg capsules  
17 Temozolomide 180mg capsules  
18 Temozolomide 140mg capsules  
19 Temomedac 5mg capsules (medac UK)  
20 Temomedac 140mg capsules (medac UK)  
21 Temomedac 250mg capsules (medac UK)  
22 Temodal 20mg capsules (Merck Sharp & Dohme Ltd)  
23 Temodal 250mg capsules (Merck Sharp & Dohme Ltd)  
24 Temomedac 20mg capsules (medac UK)  
25 Temodal 140mg capsules (Merck Sharp & Dohme Ltd)  
26 Temomedac 180mg capsules (medac UK)  
27 Temodal 100mg capsules (Merck Sharp & Dohme Ltd)  
28 Temozolomide 5mg capsules  
29 Temozolomide 100mg capsules  
30 Temsirolimus 30mg/1.2ml solution for infusion vials and diluent  
31 Torisel 30mg/1.2ml concentrate for solution for infusion vials and diluent (Pfizer Ltd)  
32 Thiotepa 15mg powder for solution for infusion vials  
33 Tepadina 15mg powder for concentrate for solution for infusion vials (Adienne Pharma & Biotech)  
34 Thiotepa 100mg powder for solution for infusion vials  
35 Thiotepa 15mg powder for solution for injection vials  
36 Tepadina 100mg powder for concentrate for solution for infusion vials (Adienne Pharma & Biotech)  
37 Tioguanine 40mg tablets  
38 Lanvis 40mg tablets (Aspen Pharma Trading Ltd)  
39 Trifluridine 15mg / Tipiracil 6.14mg tablets  
40 Trifluridine 20mg / Tipiracil 8.19mg tablets  
41 Lonsurf 20mg/8.19mg tablets (Servier Laboratories Ltd)  
42 Lonsurf 15mg/6.14mg tablets (Servier Laboratories Ltd)  
43 Potactasol 1mg powder for concentrate for solution for infusion vials (Actavis UK Ltd)  
44 Topotecan 4mg powder for solution for infusion vials  
45 Topotecan 4mg/4ml solution for infusion vials  
46 Topotecan 1mg capsules  
47 Topotecan 250microgram capsules  
48 Hycamtin 1mg capsules (Novartis Pharmaceuticals UK Ltd)  
49 Hycamtin 1mg powder for concentrate for solution for infusion vials (Novartis Pharmaceuticals UK Ltd)  
50 Potactasol 4mg powder for concentrate for solution for infusion vials (Actavis UK Ltd)

- 1
- 2 Topotecan 1mg powder for solution for infusion vials
- 3 Hycamtin 4mg powder for concentrate for solution for infusion vials (Novartis Pharmaceuticals UK Ltd)
- 4 Topotecan 1mg/1ml solution for infusion vials
- 5 Hycamtin 0.25mg capsules (Novartis Pharmaceuticals UK Ltd)
- 6 Mekinist 2mg tablets (Novartis Pharmaceuticals UK Ltd)
- 7 Trametinib 500micrograms tablets
- 8 Mekinist 0.5mg tablets (Novartis Pharmaceuticals UK Ltd)
- 9 Trametinib 2mg tablets
- 10
- 11 Herceptin 150mg powder for solution for infusion vials (Roche Products Ltd)
- 12 Trastuzumab 150mg powder for solution for infusion vials
- 13 Trastuzumab emtansine 160mg powder for solution for infusion vials
- 14 Kadcylla 160mg powder for concentrate for solution for infusion vials (Roche Products Ltd)
- 15 Trastuzumab emtansine 100mg powder for solution for infusion vials
- 16 Kadcylla 100mg powder for concentrate for solution for infusion vials (Roche Products Ltd)
- 17
- 18 Treosulfan 5g powder for solution for injection vials
- 19 Treosulfan 250mg capsules
- 20 Treosulfan 1g powder for solution for injection vials
- 21 Vesanoind 10mg capsules (Intrapharm Laboratories Ltd)
- 22 Tretinoin 10mg capsules
- 23 Vandetanib 100mg tablets
- 24 Caprelsa 300mg tablets (Genzyme Therapeutics Ltd)
- 25 Caprelsa 100mg tablets (Genzyme Therapeutics Ltd)
- 26 Vandetanib 300mg tablets
- 27 Vemurafenib 240mg tablets
- 28 Zelboraf 240mg tablets (Roche Products Ltd)
- 29 Venetoclax 100mg tablets
- 30 Venclyxto 50mg tablets (AbbVie Ltd)
- 31 Venetoclax 10mg tablets
- 32 Venetoclax 50mg tablets
- 33 Venclyxto 10mg tablets (AbbVie Ltd)
- 34 Venclyxto 100mg tablets (AbbVie Ltd)
- 35
- 36 Velbe 10mg powder for solution for injection vials (Eli Lilly and Company Ltd)
- 37 Vincristine 5mg/5ml solution for injection vials
- 38 Vincristine 1mg/1ml solution for injection vials
- 39 Vincristine 2mg/2ml solution for injection vials
- 40 Oncovin 1mg/1ml solution for injection vials (Eli Lilly and Company Ltd)
- 41 Vindesine 5mg powder for solution for injection vials
- 42 Eldisine 5mg powder for solution for injection vials (Thornton & Ross Ltd)
- 43 Vinorelbine 50mg/5ml solution for infusion vials
- 44 Vinorelbine 10mg/1ml solution for infusion vials
- 45 Navelbine 80mg capsules (Pierre Fabre Ltd)
- 46 Vinorelbine 30mg capsules
- 47 Vinorelbine 20mg capsules
- 48 Navelbine 50mg/5ml concentrate for solution for infusion vials (Pierre Fabre Ltd)
- 49 Navelbine 30mg capsules (Pierre Fabre Ltd)
- 50 Vinorelbine 80mg capsules
- 51 Navelbine 20mg capsules (Pierre Fabre Ltd)
- 52 Navelbine 10mg/1ml concentrate for solution for infusion vials (Pierre Fabre Ltd)
- 53
- 54 Vismodegib 150mg capsules
- 55 Erivedge 150mg capsules (Roche Products Ltd)
- 56
- 57
- 58
- 59
- 60

1  
2 Erivedge 150mg capsules (Roche Products Ltd)  
3  
4  
5  
6  
7  
8  
9  
10  
11  
12  
13  
14  
15  
16  
17  
18  
19  
20  
21  
22  
23  
24  
25  
26  
27  
28  
29  
30  
31  
32  
33  
34  
35  
36  
37  
38  
39  
40  
41  
42  
43  
44  
45  
46  
47  
48  
49  
50  
51  
52  
53  
54  
55  
56  
57  
58  
59  
60

For peer review only

1  
2  
3  
4  
5  
6  
7  
8  
9  
10  
11  
12  
13  
14  
15  
16  
17  
18  
19  
20  
21  
22  
23  
24  
25  
26  
27  
28  
29  
30  
31  
32  
33  
34  
35  
36  
37  
38  
39  
40  
41  
42  
43  
44  
45  
46  
47  
48  
49  
50  
51  
52  
53  
54  
55  
56  
57  
58  
59  
60

For peer review only

1  
2  
3  
4  
5  
6  
7  
8  
9  
10  
11  
12  
13  
14  
15  
16  
17  
18  
19  
20  
21  
22  
23  
24  
25  
26  
27  
28  
29  
30  
31  
32  
33  
34  
35  
36  
37  
38  
39  
40  
41  
42  
43  
44  
45  
46  
47  
48  
49  
50  
51  
52  
53  
54  
55  
56  
57  
58  
59  
60

For peer review only

1  
2  
3  
4  
5  
6  
7  
8  
9  
10  
11  
12  
13  
14  
15  
16  
17  
18  
19  
20  
21  
22  
23  
24  
25  
26  
27  
28  
29  
30  
31  
32  
33  
34  
35  
36  
37  
38  
39  
40  
41  
42  
43  
44  
45  
46  
47  
48  
49  
50  
51  
52  
53  
54  
55  
56  
57  
58  
59  
60

For peer review only



1  
2  
3  
4  
5  
6  
7  
8  
9  
10  
11  
12  
13  
14  
15  
16  
17  
18  
19  
20  
21  
22  
23  
24  
25  
26  
27  
28  
29  
30  
31  
32  
33  
34  
35  
36  
37  
38  
39  
40  
41  
42  
43  
44  
45  
46  
47  
48  
49  
50  
51  
52  
53  
54  
55  
56  
57  
58  
59  
60

For peer review only

1  
2  
3  
4  
5  
6  
7  
8  
9  
10  
11  
12  
13  
14  
15  
16  
17  
18  
19  
20  
21  
22  
23  
24  
25  
26  
27  
28  
29  
30  
31  
32  
33  
34  
35  
36  
37  
38  
39  
40  
41  
42  
43  
44  
45  
46  
47  
48  
49  
50  
51  
52  
53  
54  
55  
56  
57  
58  
59  
60

d)  
d)

For peer review only

1  
2  
3  
4  
5  
6  
7  
8  
9  
10  
11  
12  
13  
14  
15  
16  
17  
18  
19  
20  
21  
22  
23  
24  
25  
26  
27  
28  
29  
30  
31  
32  
33  
34  
35  
36  
37  
38  
39  
40  
41  
42  
43  
44  
45  
46  
47  
48  
49  
50  
51  
52  
53  
54  
55  
56  
57  
58  
59  
60

For peer review only

1  
2  
3  
4  
5  
6  
7  
8  
9  
10  
11  
12  
13  
14  
15  
16  
17  
18  
19  
20  
21  
22  
23  
24  
25  
26  
27  
28  
29  
30  
31  
32  
33  
34  
35  
36  
37  
38  
39  
40  
41  
42  
43  
44  
45  
46  
47  
48  
49  
50  
51  
52  
53  
54  
55  
56  
57  
58  
59  
60

For peer review only

1  
2  
3  
4  
5  
6  
7  
8  
9  
10  
11  
12  
13  
14  
15  
16  
17  
18  
19  
20  
21  
22  
23  
24  
25  
26  
27  
28  
29  
30  
31  
32  
33  
34  
35  
36  
37  
38  
39  
40  
41  
42  
43  
44  
45  
46  
47  
48  
49  
50  
51  
52  
53  
54  
55  
56  
57  
58  
59  
60

For peer review only

1  
2  
3  
4  
5  
6  
7  
8  
9  
10  
11  
12  
13  
14  
15  
16  
17  
18  
19  
20  
21  
22  
23  
24  
25  
26  
27  
28  
29  
30  
31  
32  
33  
34  
35  
36  
37  
38  
39  
40  
41  
42  
43  
44  
45  
46  
47  
48  
49  
50  
51  
52  
53  
54  
55  
56  
57  
58  
59  
60

For peer review only

1  
2  
3  
4  
5  
6  
7  
8  
9  
10  
11  
12  
13  
14  
15  
16  
17  
18  
19  
20  
21  
22  
23  
24  
25  
26  
27  
28  
29  
30  
31  
32  
33  
34  
35  
36  
37  
38  
39  
40  
41  
42  
43  
44  
45  
46  
47  
48  
49  
50  
51  
52  
53  
54  
55  
56  
57  
58  
59  
60

For peer review only

1  
2  
3  
4  
5  
6  
7  
8  
9  
10  
11  
12  
13  
14  
15  
16  
17  
18  
19  
20  
21  
22  
23  
24  
25  
26  
27  
28  
29  
30  
31  
32  
33  
34  
35  
36  
37  
38  
39  
40  
41  
42  
43  
44  
45  
46  
47  
48  
49  
50  
51  
52  
53  
54  
55  
56  
57  
58  
59  
60

For peer review only



1  
2  
3  
4  
5  
6  
7  
8  
9  
10  
11  
12  
13  
14  
15  
16  
17  
18  
19  
20  
21  
22  
23  
24  
25  
26  
27  
28  
29  
30  
31  
32  
33  
34  
35  
36  
37  
38  
39  
40  
41  
42  
43  
44  
45  
46  
47  
48  
49  
50  
51  
52  
53  
54  
55  
56  
57  
58  
59  
60

For peer review only

|    |                  |
|----|------------------|
| 1  |                  |
| 2  | Medcodeid        |
| 3  | 103777013        |
| 4  | 117168016        |
| 5  | 270232016        |
| 6  | 270616014        |
| 7  | 272325018        |
| 8  | 272389014        |
| 9  | 324973015        |
| 10 | 324974014        |
| 11 | 324975010        |
| 12 | 348547019        |
| 13 | 348550016        |
| 14 | 354610013        |
| 15 | 354613010        |
| 16 | 354616019        |
| 17 | 354621016        |
| 18 | 354628010        |
| 19 | 413415016        |
| 20 | 474471011        |
| 21 | 855601000006117  |
| 22 | 864761000006115  |
| 23 | 988961000006115  |
| 24 | 1711491000006119 |
| 25 | 1711511000006113 |
| 26 | 2189151000000117 |
| 27 | 2191221000000118 |
| 28 | 2197961000000113 |
| 29 | 1620531000006113 |
| 30 | 270768010        |
| 31 | 270777015        |
| 32 | 272326017        |
| 33 | 272327014        |
| 34 | 31211000006119   |
| 35 | 177251000006119  |
| 36 | 225661000006111  |
| 37 | 380061000000118  |
| 38 | 478131000006115  |
| 39 | 1905531000006112 |
| 40 | 859491000006112  |
| 41 | 900121000006113  |
| 42 | 1227663018       |
| 43 | 3527364013       |
| 44 | 3647071000006110 |
| 45 | 5039311000006114 |
| 46 | 5096171000006118 |
| 47 | 4542501000006119 |
| 48 | 3532180010       |
| 49 | 4663311000006116 |
| 50 | 2786011000006112 |
| 51 | 5340221000006117 |

For peer review only

1 4669451000006113  
2 3647061000006115  
3 12458801000006116  
4 4542461000006119  
5 4542691000006113  
6 3022121000006117  
7 7688001000006116  
8 4668981000006117  
9 2786021000006116  
10 3647051000006117  
11 4663811000006112  
12 3930661000006110  
13 4410641000006115  
14 4668961000006110  
15 7104131000006119  
16 5039331000006115  
17 2786001000006114  
18 4661791000006112  
19 4663791000006113  
20 864951000006119  
21 2560511000006119  
22 3786771000006114  
23 7237331000006116  
24 7237321000006119  
25 7316561000006118  
26 2618391000006114  
27 9935651000006116  
28 7279701000006119  
29 3346301000006113  
30 6948351000006111  
31 7838631000006116  
32 8030371000006119  
33 8453111000006110  
34 11910651000006112  
35 3653831000006114  
36 5161091000006119  
37 5096231000006110  
38 7237731000006117  
39 7139341000006119  
40 7254711000006117  
41 7985891000006113  
42 2666681000006118  
43 5087211000006119  
44 7791461000006114  
45 5057551000006110  
46 7351231000006114  
47 2641011000006119  
48 2641021000006110  
49 7766401000006118  
50 5039351000006110

For peer review only

1  
2 6018741000006111  
3 7385581000006116  
4 3636952011  
5 7710041000006114  
6 7475631000006115  
7 7986241000006112  
8 7150611000006118  
9 7566431000006113  
10 8335521000006117  
11 7791471000006119  
12 8453081000006116  
13 7100591000006115  
14 7710031000006116  
15 5039341000006113  
16 5157601000006116  
17 3534658012  
18 5039371000006117  
19 7170221000006110  
20 7838621000006119  
21 7566411000006119  
22 8115451000006112  
23 2868911000006114  
24 3598901000006118  
25 3786781000006112  
26 5959291000006115  
27 7383621000006115  
28 6932441000006115  
29 7507901000006114  
30 8268201000006117  
31 3527360016  
32 3033691000006115  
33 3670311000006119  
34 3915911000006117  
35 5096031000006117  
36 7785581000006115  
37 7507891000006110  
38 7838611000006110  
39 7566391000006119  
40 2949531000006115  
41 6948341000006114  
42 7189591000006110  
43 8325471000006118  
44 12458821000006114  
45 8117811000006119  
46 8348931000006116  
47 2447021000000110  
48 5087221000006110  
49 5057581000006119  
50 5096241000006117  
51 7103511000006119

For peer review only

1 7184551000006117  
2 2660021000006113  
3 5039361000006112  
4 5096051000006112  
5 3527362012  
6 8453711000006114  
7 12019461000006111  
8 7133421000006117  
9 3534651018  
10 4218231000006113  
11 4745181000006113  
12 5057571000006117  
13 7150631000006112  
14 7791441000006110  
15 8293001000006116  
16 7080931000006116  
17 7148541000006115  
18 2666671000006116  
19 3653841000006116  
20 90511000006115  
21 1549841000006116  
22 460649019  
23 461518012  
24 7986201000006110  
25 7752391000006113  
26 4323211000006112  
27 8325851000006114  
28 4319871000006111  
29 8325771000006113  
30 2868901000006111  
31 5161121000006115  
32 2660011000006117  
33 12031651000006118  
34 8284621000006118  
35 3825411000006114  
36 7475621000006118  
37 8450901000006118  
38 6718281000006112  
39 3973131000006117  
40 4779991000006112  
41 7714921000006112  
42 7181301000006112  
43 5057561000006112  
44 5161131000006117  
45 3825401000006111  
46 5980831000006116  
47 7385571000006119  
48 7298951000006115  
49 8313221000006113  
50 8325881000006118

For peer review only

1  
2 3455171000006118  
3 460955014  
4 4663831000006118  
5 4661761000006116  
6 7688541000006114  
7  
8 460645013  
9 754061000006111  
10 460643018  
11 1227661016  
12 384481000006118  
13 42151000006116  
14 270234015  
15 270618010  
16 1713291000006119  
17 1713331000006114  
18 2676200013  
19 354623018  
20 354627017  
21 422992018  
22 324971018  
23 270615013  
24 501594013  
25 7150641000006119  
26 8321131000006112  
27 7767241000006119  
28 7786611000006116  
29 5161291000006110  
30 5059341000006114  
31 7167121000006113  
32 7212371000006110  
33 7167141000006118  
34 7190521000006119  
35 7688081000006113  
36 5056471000006118  
37 11910741000006116  
38 380101000000116  
39 822591000006117  
40 6932431000006113  
41 8321141000006119  
42 7613121000006116  
43 12019471000006116  
44 6024591000006114  
45 5094171000006114  
46 7150621000006114  
47 8327141000006110  
48 7351241000006116  
49 5340201000006110  
50 3534653015  
51 933321000006111  
52 5096191000006117

For peer review only

1 4410651000006118  
2 4663841000006111  
3 3023061000006115  
4 3023081000006113  
5 5486891000006118  
6 460650019  
7 42161000006119  
8 268099017  
9 268100013  
10 270767017  
11 2209021000000112  
12 2234621000000111  
13 7766381000006118  
14 354612017  
15 270621012  
16 30458014  
17 2160027017  
18 403103015  
19 7484221000006112  
20 3973121000006115  
21 5161281000006112  
22 7150601000006116  
23 4319661000006117  
24 6585661000006112  
25 7767231000006112  
26 362091000000110  
27 460651015  
28 3636384014  
29 2890701000006112  
30 8325791000006114  
31 6933861000006111  
32 4319821000006110  
33 6316361000006112  
34 7167181000006112  
35 5053751000006110  
36 7566421000006110  
37 7767221000006114  
38 7565141000006116  
39 8348921000006119  
40 7167131000006111  
41 7569841000006114  
42 7238481000006111  
43 7710051000006111  
44 5599451000006111  
45 7385561000006114  
46 4661751000006118  
47 4668951000006113  
48 4669011000006116  
49 7080381000006116  
50 6933851000006114

For peer review only

1  
2 4668971000006115  
3 3485411000006113  
4 3022131000006119  
5 424791000006110  
6 500371000006119  
7 500401000006116  
8 1550021000006110  
9 324977019  
10 55971000006117  
11 90461000006118  
12 270233014  
13 2209101000000119  
14 2234541000000115  
15 906351000006116  
16 272320011  
17 354617011  
18 8335251000006112  
19 2560521000006110  
20 5096271000006113  
21 7168651000006111  
22 7171231000006119  
23 8284921000006111  
24 7279711000006116  
25 7985971000006118  
26 5647621000006110  
27 177341000006111  
28 7791451000006112  
29 8115511000006112  
30 8325761000006118  
31 8325871000006116  
32 5096281000006111  
33 3455181000006115  
34 8325481000006115  
35 8451601000006117  
36 5538541000006110  
37 12458511000006115  
38 5647611000006119  
39 7254721000006113  
40 460644012  
41 4323341000006116  
42 90471000006113  
43 372621000000114  
44 7496071000006114  
45 7139351000006117  
46 7214301000006113  
47 12719481000006116  
48 4542701000006113  
49 3647031000006112  
50 5043991000006117  
51 4663821000006116

For peer review only



1  
2 5043981000006115  
3 4669051000006115  
4 8258171000006110  
5 3022141000006112  
6 7688041000006119  
7 3022111000006113  
8 7091541000006113  
9 478111000006114  
10 818821000006110  
11 376141000000113  
12 90421000006112  
13 2198001000000111  
14 2198141000000110  
15 1800881000000119  
16 1709421000006118  
17 864281000006116  
18 225671000006116  
19 2160021016  
20 73655011  
21 270612011  
22 270614012  
23 270766014  
24 324970017  
25 324976011  
26 353974015  
27 354624012  
28 354631011  
29 3790671000006119  
30 2626431000006112  
31 7090481000006112  
32 12031641000006115  
33 5980821000006119  
34 7132471000006114  
35 7766371000006116  
36 11909781000006115  
37 11913051000006114  
38 2937111000006111  
39 3915921000006113  
40 7238471000006113  
41 8090361000006115  
42 5593651000006110  
43 3516351000006115  
44 7791431000006117  
45 8325861000006111  
46 3737491000006113  
47 8325781000006111  
48 7209391000006119  
49 3534659016  
50 2743241000000110  
51 8325891000006115  
52  
53  
54  
55  
56  
57  
58  
59  
60

For peer review only

1  
2 5161081000006117  
3 3260851000006117  
4 11913041000006112  
5 8335261000006114  
6 7133411000006113  
7 7348311000006117  
8 7766391000006115  
9 7080921000006119  
10 5044001000006114  
11 5157591000006112  
12 7569831000006116  
13 7932051000006112  
14 3292751000006114  
15 12719251000006111  
16 90611000006119  
17 399381000000115  
18 3022151000006114  
19 3515071000006117  
20 4663371000006113  
21 3647021000006114  
22 8325571000006119  
23 3023071000006110  
24 3532181014  
25 5096211000006116  
26 4661781000006114  
27 7104121000006117  
28 739931000006118  
29 270617017  
30 270770018  
31 270776012  
32 270778013  
33 1834341000006111  
34 861571000006118  
35 366671000000118  
36 282927013  
37 354615015  
38 354618018  
39 354619014  
40 7212381000006113  
41 8293011000006118  
42 8321121000006114  
43 7986531000006116  
44 5087201000006117  
45 270769019  
46 4542541000006117  
47 251924010  
48 4542681000006110  
49 251930010  
50 251923016  
51 4542521000006112

For peer review only

1  
2 251929017  
3 4542661000006117  
4 2674490015  
5 2674491016  
6 8047851000006119  
7 8294221000006119  
8 5611161000006112  
9 5063131000006112  
10 5063121000006114  
11 361931000000119  
12 491071000000110  
13 7504171000006112  
14 6240891000006113  
15 8087441000006110  
16 7644221000006118  
17 7644211000006114  
18 3448711000006119  
19 7265981000006117  
20 5063031000006111  
21 5063081000006112  
22 5063041000006118  
23 5065771000006112  
24 2878601000006113  
25 3454841000006117  
26 5065791000006113  
27 5065801000006114  
28 5063101000006116  
29 5063051000006116  
30 2674363011  
31 2674539019  
32 746211000000116  
33 12759381000006119  
34 8038051000006113  
35 277293014  
36 2674362018  
37 12725251000006119  
38 277294015  
39 386791000000112  
40 365791000000118  
41 2674322017  
42 277291011  
43 380521000000119  
44 7046211000006111  
45 500101000006110  
46 5611121000006118  
47 415107013  
48  
49  
50  
51  
52  
53  
54  
55  
56  
57  
58  
59  
60

For peer review only

1  
2 Term  
3 Transplantation of pancreas  
4 Renal transplant  
5 Replacement of previous liver transplant  
6 Renewal of transplanted pancreatic tissue  
7 Cadaveric renal transplant  
8 Exploration of renal transplant  
9 Kidney transplant failure and rejection  
10 Heart transplant failure and rejection  
11 Heart-lung transplant failure and rejection  
12 Single lung transplant  
13 Double lung transplant  
14 Renal transplant rejection  
15 Very mild acute rejection of renal transplant  
16 Acute rejection of renal transplant - grade I  
17 Chronic transplant nephropathy  
18 Acute-on-chronic rejection of renal transplant  
19 Unexplained episode of renal transplant dysfunction  
20 Transplantation of islets of Langerhans  
21 Transplant biopsy  
22 Pancreas transplant  
23 Renal transplant rejected  
24 Post-transplant bronchiolitis obliterans syndrome  
25 Lung transplant evaluation  
26 Urological complication of renal transplant  
27 Vascular complication of renal transplant  
28 Rupture of artery of transplanted kidney  
29 Paediatric transplantation surgery  
30 Transplantation of heart and lung NOS  
31 Other specified other transplantation of heart  
32 Other specified transplantation of kidney  
33 Transplantation of kidney NOS  
34 Orthotopic transplantation of liver  
35 Renal transplant with complication  
36 Piggy back liver transplant  
37 Interventions associated with transplantation of kidney NOS  
38 Allotransplantation of kidney from cadaver  
39 Excision of rejected transplanted kidney  
40 Corneal transplant  
41 Renal transplant rejected  
42 [V]Pancreas transplanted  
43 Transplanted liver present  
44 Tx - Kidney transplantation  
45 SLTx - Single lung transplant  
46 Mild chronic transplant nephropathy  
47 History of renal transplant  
48 Liver transplant recipient  
49 Whole organ pancreatic transplant  
50 Hepatic transplantation  
51 PTLN - Post-transplant lymphoproliferative disorder

1 Exploration of kidney transplant  
2 Kidney transplant  
3 [V]Liver transplanted  
4 History of organ transplant  
5 History of being lung transplant recipient  
6 Heart transplant  
7 Allotransplantation of kidney with DBD (donation after brain stem death)  
8 Renal autotransplantation or reimplantation of kidney  
9 LTx - Liver transplant  
10 Tx - Renal transplantation  
11 Xenotransplant of heart  
12 Transplant of lung  
13 Islet cell transplant  
14 Autotransplant kidney  
15 Disorder affecting transplant  
16 DLTx - Double lung transplant  
17 Tx - Liver transplantation  
18 Piggy-back liver transplant  
19 Allotransplant of heart and lung  
20 Heart transplant  
21 Structure of transplanted liver  
22 Anaesthesia for corneal transplant  
23 MR angiography of transplanted kidney  
24 Magnetic resonance angiography of transplanted kidney  
25 Monomorphic posttransplant lymphoproliferative disorder  
26 Immunosuppressive therapy for transplant  
27 Awaiting transplantation of lung  
28 Radionuclide imaging of transplanted kidney  
29 Renal homotransplantation excluding donor and recipient nephrectomy  
30 Renal transplant venogram  
31 Infectious mononucleosis-like post-transplant lymphoproliferative disorder  
32 Aftercare for liver transplant done  
33 Emergency hospital admission to cardiothoracic transplantation surgery service  
34 [V]Kidney transplanted  
35 Structure of transplanted kidney  
36 Ultrasound scan of transplant liver  
37 Failed renal transplant  
38 Specimen from transplanted lung obtained by excision  
39 Rejection of pancreas transplant  
40 Percutaneous transhepatic transplantation of pancreatic islet cell using fluoroscopic guidance  
41 Transplantation of kidney and pancreas  
42 Transplanted cornea  
43 Liver transplant rejection  
44 Entire transplanted pancreatic islets  
45 Cardiac transplant disorder  
46 Fluoroscopic venography of transplanted pancreas using contrast  
47 Anaesthesia for heart/lung transplant  
48 Anesthesia for heart/lung transplant  
49 Retrograde insertion of ureteric stent into ureter of transplanted kidney using fluoroscopic guidance  
50 Double lung transplant en bloc

1 Lung transplant rejection  
2 Post transplant lymphoproliferative disorder  
3 Bronchiolitis obliterans syndrome due to and after lung transplantation  
4 Transplant renal artery stenosis  
5 Disorder of heart muscle associated with rejection of cardiac transplant  
6 Laparoscopic biopsy of transplanted pancreas  
7 Doppler ultrasonography (US) of transplanted kidney  
8 Liver transplant recipient  
9 History of heart-lung transplant recipient  
10 Entire transplanted islets of Langerhans  
11 Emergency hospital admission to transplantation surgery service  
12 Disorder of transplanted heart  
13 Structure of renal artery of transplanted kidney  
14 Double lung transplant as a block  
15 Renal transplant venogram  
16 Transplanted heart-lung present  
17 BSSLTx - Bilateral sequential single lung transplant  
18 Chronic rejection of liver transplant  
19 Reactive plasmacytic hyperplasia post-transplant lymphoproliferative disorder  
20 Lung transplant recipient  
21 Transplanted lung resection sample  
22 Anesthesia for renal transplant  
23 Heterotransplant of pancreas  
24 Anesthesia for corneal transplant  
25 Discharge from transplant surgery service  
26 Revision of transplantation of heart  
27 Renal transplant angiogram  
28 History of pancreas transplant  
29 Allotransplantation of lobe of lung from live donor  
30 Transplanted kidney present  
31 Complication of transplanted liver  
32 Homotransplant of pancreas  
33 Anaesthesia for heart transplant  
34 Primary non-function of renal transplant  
35 Kidney transplant recipient  
36 History of transplantation of pancreas  
37 Early post-transplant lymphoproliferative disorder  
38 Cornea transplant recipient  
39 Liver transplant without recipient hepatectomy  
40 Fluoroscopic venography of renal transplant  
41 Hyperacute rejection of pancreas transplant  
42 Fluoroscopic angiography of transplanted liver  
43 [V]Lung transplanted  
44 Renal transplant recipient  
45 Fluoroscopy guided retrograde insertion of stent into ureter of transplanted kidney  
46 Cardiothoracic transplantation care plan  
47 Liver transplant failure  
48 Cardiac transplant failure  
49 Perfusion injury of renal transplant  
50 Disorder related to renal transplantation

1 Accelerated rejection of pancreas transplant  
2 Transplanted lung  
3 Bilateral sequential single lung transplant  
4 Hyperacute rejection of renal transplant  
5 Transplanted lung present  
6 Emergency hospital admission to paediatric transplantation surgery service  
7 Fluoroscopy guided removal of nephrostomy tube from transplanted kidney  
8 Acute rejection of lung transplant  
9 Heart transplant recipient  
10 Kidney transplant evaluation  
11 Entire transplanted lung  
12 Cardiac transplant rejection  
13 Doppler ultrasound scan of transplanted kidney  
14 Structure of transplanted islets of Langerhans  
15 Living donor liver transplantation  
16 Disorder related to lung transplantation  
17 Chronic rejection of cardiac transplant  
18 Structure of transplanted cornea  
19 Transplanted kidney  
20 LTx - Lung transplant  
21 Allotransplantation of kidney from non-beating heart cadaver  
22 Transplanted cornea present  
23 Transplant present  
24 Percutaneous needle biopsy of transplanted pancreas  
25 Heart-lung transplant recipient  
26 Spinal cord transplantation  
27 CT of transplanted liver  
28 Cardiovascular system transplantation  
29 Ultrasound guided biopsy of transplanted liver  
30 Anaesthesia for renal transplant  
31 US scan of transplant pancreas  
32 Structure of transplanted lung  
33 Allotransplantation of right kidney  
34 Allogeneic transplantation of pancreatic islet cells  
35 Transplanted heart  
36 Disorder of myocardium associated with rejection of cardiac transplant  
37 Pretransplant evaluation of liver recipient  
38 Autotransplantation of heart  
39 Anesthesia for liver transplant  
40 Entire transplanted heart  
41 Chronic kidney disease stage 5 with transplant  
42 Acute rejection of pancreas transplant  
43 Complication of transplanted heart  
44 Ultrasound scan of transplant pancreas  
45 Structure of transplanted heart  
46 Heart transplant biopsy  
47 Post transplant lymphoproliferative disorder  
48 Arteriosclerosis of coronary artery bypass graft of transplanted heart  
49 Cardiothoracic transplantation service  
50 Fluoroscopy guided percutaneous transjugular biopsy of transplanted liver

1 Disorder of transplanted kidney  
2 [V]Heart and lungs transplant status  
3 Auxiliary heart transplant  
4 Orthotopic transplantation of liver  
5 Transplantation of kidney regime  
6 [V]Heart transplanted  
7 Kidney transplant with complication  
8 [V]Transplanted organ or tissue  
9 [V]Transplanted organ  
10 [X]Failure & rejection of other transplanted organ & tissue  
11 Organ transplant with complication  
12 Transplantation of liver NOS  
13 Transplantation of pancreas NOS  
14 Cardiothoracic transplantation  
15 Transplantation surgery  
16 Orthotopic transplantation of whole liver  
17 Chronic rejection of renal transplant - grade 1  
18 Chronic rejection of renal transplant - grade III  
19 Excision of rejected transplanted kidney  
20 Transplanted organ rejection  
21 Transplantation of tail of pancreas  
22 Transplantation of kidney  
23 Doppler ultrasound of transplanted kidney  
24 Ultrasound guided insertion of nephrostomy tube into transplanted kidney  
25 Doppler ultrasound of transplanted liver  
26 Structure of transplanted pancreas  
27 Ultrasound scan of transplant kidney  
28 Transplant renal vein thrombosis  
29 Hyperacute rejection of liver transplant  
30 Specimen from transplanted kidney obtained by biopsy  
31 Hyperacute rejection of lung transplant  
32 Chronic rejection of pancreas transplant  
33 Doppler ultrasonography of blood vessel of organ transplant  
34 Accelerated coronary artery disease in transplanted heart  
35 [V]Liver transplanted  
36 Examination of recipient after kidney transplant  
37 Heterotopic liver transplant  
38 Fluoroscopic angiography of renal transplant  
39 Fluoroscopy guided insertion of nephrostomy tube into transplanted kidney  
40 Recurrent post-transplant renal disease  
41 Removal of nephrostomy tube from transplanted kidney using fluoroscopic guidance  
42 Solid organ transplant  
43 End stage renal failure with renal transplant  
44 Doppler ultrasonography of transplanted kidney  
45 Radioisotope hepatobiliary function study with stimulation post transplant  
46 Fluoroscopic venogram of transplanted pancreas using contrast  
47 Post-transplant neoplasia  
48 Transplanted heart present  
49 Corneal transplant  
50 Moderate chronic transplant nephropathy



1 Transplantation of islet cells  
2 Piggy-back heart transplant  
3 Heart-lung transplant with recipient cardiectomy-pneumonectomy  
4 Heart and lung transplant  
5 Removal of transplanted kidney  
6 [V]Lung transplanted  
7 Organ transplant with complication  
8 Other specified transplantation of lung  
9 Transplantation of lung NOS  
10 Other specified transplantation of heart and lung  
11 Aneurysm of vein of transplanted kidney  
12 Thrombosis of vein of transplanted kidney  
13 Antegrade insertion of ureteric stent into ureter of transplanted kidney using fluoroscopic guidance  
14 Accelerated rejection of renal transplant  
15 Excision of transplanted pancreas  
16 Transplantation of liver  
17 Transplantation surgery  
18 Transplanted organ failure  
19 Normal renal function of transplanted kidney  
20 Anaesthesia for liver transplant  
21 US scan of transplant kidney  
22 US doppler scan of transplanted kidney  
23 Bronchus transplantation  
24 Post-transplant lymphoproliferative disorder  
25 Doppler ultrasound scan of transplanted liver  
26 Transplantation of single lobe of lung  
27 Transplanted liver present  
28 Polymorphic lymphoproliferative disorder following transplant  
29 Transplanted organ  
30 MRI angiogram of transplanted liver  
31 Fluoroscopy and angioplasty of renal transplant  
32 Pleura transplantation  
33 Entire transplanted cornea  
34 Accelerated rejection of liver transplant  
35 Post-lung transplantation bronchiectasis  
36 Heart transplant recipient  
37 Doppler ultrasonography of transplanted liver  
38 Doppler ultrasound of transplant liver  
39 Fluoroscopy guided antegrade insertion of stent into ureter of transplanted kidney  
40 Hyperacute rejection of cardiac transplant  
41 Vesicoureteric reflux after renal transplant  
42 Ultrasonography guided biopsy of transplanted kidney  
43 Renal artery stenosis of transplanted kidney  
44 Part organ pancreatic transplant  
45 Post transplant lymphoproliferative disorder  
46 Orthotopic liver transplant  
47 Autotransplantation of kidney  
48 Live donor renal allotransplant  
49 Hypertension associated with transplantation  
50 Fluoroscopic angioplasty of renal transplant

1 Renal autotransplantation  
2 Corneal transplant  
3 CTx - Cardiac transplant  
4 [X]Renal tubulo-interstitial disorders/transplant rejection  
5 Autotransplant of kidney  
6 Auxillary liver transplant  
7 OS interventions associated with transplantation of kidney  
8 Transplanted organ complication NOS  
9 Xenotransplantation of heart  
10 Transplantation of kidney from cadaver  
11 Other specified transplantation of liver  
12 Aneurysm of artery of transplanted kidney  
13 Thrombosis of artery of transplanted kidney  
14 [RFC] Renal transplant  
15 Allotransplantation of kidney from live donor  
16 Acute rejection of renal transplant - grade II  
17 Ultrasonography of transplanted kidney with contrast  
18 Transplanted liver  
19 Transplant glomerulopathy  
20 Acute rejection of cardiac transplant  
21 Chronic rejection of lung transplant  
22 Autologous transplantation of pancreatic islet cells  
23 Radionuclide study of transplanted kidney  
24 Laparoscopic biopsy of transplanted kidney  
25 Entire transplant kidney  
26 Renal tubulo-interstitial disorders in transplant rejection  
27 Entire transplanted pancreas  
28 Lung transplant biopsy sample  
29 Ultrasonography guided biopsy of transplanted liver  
30 CT guided biopsy of transplanted liver  
31 Transplant glomerulopathy - early form  
32 Complication of transplanted kidney  
33 Fluoroscopic angiogram of transplanted liver  
34 Fluoroscopy guided removal of nephrostomy tube from transplanted kidney  
35 Entire transplanted liver  
36 [V]Heart transplanted  
37 Entire transplanted kidney  
38 Fluoroscopy guided percutaneous transhepatic transplantation of pancreatic islet cell  
39 History of renal transplant  
40 Eye structure transplantation  
41 Live donor renal transplant  
42 Allotransplantation of kidney from beating heart cadaver  
43 Percutaneous thrombolysis of vein of transplanted pancreas using fluoroscopic guidance  
44 Accelerated rejection of lung transplant  
45 Tissue specimen from transplanted kidney  
46 Other transplantation of heart  
47 History of lung transplant  
48 Kidney transplantation  
49 Cadaveric heart transplant  
50 Heterotopic allotransplant of heart

1 Allotransplant of heart  
2 Cadaver renal allotransplant  
3 Bronchiolitis obliterans syndrome after lung transplantation  
4 HtTx - Heart transplant  
5 Allotransplantation of kidney with DCD (donation after cardiac death)  
6 Heart transplantation  
7 Post-transplantation of kidney examination of recipient  
8 Allotransplantation of heart and lung  
9 Heart transplant with complication  
10 Orthotopic transplantation of liver NEC  
11 Transplantation of heart and lung  
12 Rupture of vein of transplanted kidney  
13 Stenosis of vein of transplanted kidney  
14 Post-transplant bronchiolitis obliterans syndrome  
15 Complication of transplanted lung  
16 Liver transplant  
17 Piggyback transplantation of heart  
18 Cardiothoracic transplantation  
19 Complication of transplanted lung  
20 Transplantation of pancreas and duodenum  
21 Transplantation of whole pancreas  
22 Revision of transplantation of heart and lung  
23 Transplant rejection  
24 Liver transplant failure and rejection  
25 Xenograft renal transplant  
26 Chronic rejection of renal transplant - grade II  
27 De novo transplant disease  
28 Complication of transplanted pancreas  
29 Transplantation of adrenal gland  
30 Hypertension secondary to kidney transplant  
31 Allotransplantation of left kidney  
32 Transluminal right ventricular biopsy after heart transplant  
33 Accelerated rejection of cardiac transplant  
34 Fluoroscopy guided antegrade insertion of ureteric stent into ureter of transplanted kidney  
35 [V]Cornea transplanted  
36 [V]Transplanted organ or tissue  
37 Liver transplant with recipient hepatectomy  
38 Anesthesia for heart transplant  
39 Biopsy of transplanted kidney using ultrasound guidance  
40 History of islet cell transplant  
41 Pre-existing disease in renal transplant  
42 Autotransplant of lung  
43 Structure of transplanted pancreatic islets  
44 CT of transplanted liver with contrast  
45 Total pancreatectomy with transplantation  
46 Magnetic resonance angiography of transplanted liver  
47 Specimen from transplanted lung obtained by biopsy  
48 Heart-lung transplant recipient  
49 Transplant of kidney using robotic assistance  
50 MRI of transplanted liver

1 US scan of transplant liver  
2 Heart transplant with recipient cardiectomy  
3 [V]Transplanted organ  
4 Ultrasound scan of transplanted kidney with contrast  
5 Acute rejection of liver transplant  
6 Allotransplantation of islets of Langerhans  
7 Fluoroscopy guided retrograde insertion of ureteric stent into ureter of transplanted kidney  
8 Disorder related to cardiac transplantation  
9 Orthotopic allotransplant of heart  
10 Renal transplant arteriogram  
11 Post-renal transplant vesicoureteric reflux  
12 Entire renal artery of transplanted kidney  
13 Renal homotransplantation with unilateral recipient nephrectomy  
14 [X]Surgical operation with transplant of whole organ as the cause of abnormal reaction of the patie  
15 Transplanted organ complication  
16 Allotransplantation of kidney from cadaver NEC  
17 HTx - Heart transplant  
18 Pancreatic transplant  
19 Transplanted pancreas pancreatectomy  
20 Transplant of kidney  
21 Fluoroscopic angioplasty of transplanted liver  
22 HLTx - Heart lung transplant  
23 Cornea transplant recipient  
24 Severe chronic transplant nephropathy  
25 Auxiliary liver transplant  
26 Disorder affecting transplanted structure  
27 Liver transplant with complication  
28 Other specified transplantation of pancreas  
29 Allotransplantation of heart NEC  
30 Revision of transplantation of heart NEC  
31 Other transplantation of heart NOS  
32 Under regular review by lung transplant unit  
33 Lung transplant  
34 Interventions associated with transplantation of kidney  
35 Transplant immunosuppression  
36 Acute rejection of renal transplant  
37 Acute rejection of renal transplant - grade III  
38 Chronic rejection of renal transplant  
39 Renal transplant biopsy sample  
40 Live donor liver transplant  
41 Ultrasonography guided insertion of nephrostomy tube into transplanted kidney  
42 Coronary arteriosclerosis in native artery of transplanted heart  
43 Liver transplant disorder  
44 Transplantation of heart  
45 History of heart recipient  
46 H/O: heart recipient  
47 History of - lung recipient  
48 H/O: lung recipient  
49 H/O: kidney recipient  
50 History of - kidney recipient

1 H/O: liver recipient  
2 History of liver recipient  
3 Autologous peripheral blood stem cell transplant  
4 Allogeneic peripheral blood stem cell transplant  
5 History of peripheral stem cell transplant  
6 Limbal stem cell allograft transplantation  
7 Peripheral blood stem cell transplantation  
8 Hemopoietic stem cell transplant  
9 Haemopoietic stem cell transplant  
10 Limbal stem cell transplantation  
11 Syngeneic peripheral blood stem cell transplant  
12 Syngeneic peripheral blood stem cell transplantation  
13 Immune system transplantation  
14 Transplantation of stem cells  
15 Transplantation of autologous hematopoietic stem cell  
16 Transplantation of autologous haematopoietic stem cell  
17 Allogeneic bone marrow graft  
18 Grafting of bone marrow using allograft from unmatched unrelated donor  
19 Syngeneic bone marrow graft  
20 Allogeneic related bone marrow graft  
21 T-cell depleted allogeneic bone marrow graft  
22 Rejection of bone marrow graft  
23 Bone marrow graft  
24 Autologous bone marrow graft  
25 Failed bone marrow transplant engraftment  
26 Failure of bone marrow graft  
27 Allogeneic unrelated bone marrow graft  
28 Imperfect T-cell depleted allogeneic bone marrow graft  
29 Allograft of bone marrow from matched unrelated donor  
30 Graft of cord blood to bone marrow  
31 Allograft of bone marrow from unmatched unrelated donor  
32 Graft of bone marrow NOS  
33 Chronic graft versus host disease after transplantation of bone marrow  
34 Other specified graft of bone marrow  
35 Allograft of bone marrow from sibling donor  
36 Grafting of bone marrow NOS  
37 Graft of bone marrow NOS  
38 Other specified graft of cord blood to bone marrow  
39 Allograft of bone marrow from haploidentical donor  
40 Allograft of cord blood to bone marrow  
41 Allograft of bone marrow NEC  
42 Graft of cord blood to bone marrow NOS  
43 Grafting of cord blood to bone marrow  
44 Autograft of bone marrow  
45 PBSC - Peripheral blood stem cell graft  
46 Peripheral blood stem cell graft  
47  
48  
49  
50  
51  
52  
53  
54  
55  
56  
57  
58  
59  
60

1  
2  
3  
4  
5  
6  
7  
8  
9  
10  
11  
12  
13  
14  
15  
16  
17  
18  
19  
20  
21  
22  
23  
24  
25  
26  
27  
28  
29  
30  
31  
32  
33  
34  
35  
36  
37  
38  
39  
40  
41  
42  
43  
44  
45  
46  
47  
48  
49  
50  
51  
52  
53  
54  
55  
56  
57  
58  
59  
60

For peer review only

1  
2  
3  
4  
5  
6  
7  
8  
9  
10  
11  
12  
13  
14  
15  
16  
17  
18  
19  
20  
21  
22  
23  
24  
25  
26  
27  
28  
29  
30  
31  
32  
33  
34  
35  
36  
37  
38  
39  
40  
41  
42  
43  
44  
45  
46  
47  
48  
49  
50  
51  
52  
53  
54  
55  
56  
57  
58  
59  
60

For peer review only

ce

1  
2  
3  
4  
5  
6  
7  
8  
9  
10  
11  
12  
13  
14  
15  
16  
17  
18  
19  
20  
21  
22  
23  
24  
25  
26  
27  
28  
29  
30  
31  
32  
33  
34  
35  
36  
37  
38  
39  
40  
41  
42  
43  
44  
45  
46  
47  
48  
49  
50  
51  
52  
53  
54  
55  
56  
57  
58  
59  
60

For peer review only



1  
2  
3  
4  
5  
6  
7  
8  
9  
10  
11  
12  
13  
14  
15  
16  
17  
18  
19  
20  
21  
22  
23  
24  
25  
26  
27  
28  
29  
30  
31  
32  
33  
34  
35  
36  
37  
38  
39  
40  
41  
42  
43  
44  
45  
46  
47  
48  
49  
50  
51  
52  
53  
54  
55  
56  
57  
58  
59  
60

For peer review only

1  
2  
3  
4  
5  
6  
7  
8  
9  
10  
11  
12  
13  
14  
15  
16  
17  
18  
19  
20  
21  
22  
23  
24  
25  
26  
27  
28  
29  
30  
31  
32  
33  
34  
35  
36  
37  
38  
39  
40  
41  
42  
43  
44  
45  
46  
47  
48  
49  
50  
51  
52  
53  
54  
55  
56  
57  
58  
59  
60

For peer review only

1  
2  
3  
4  
5  
6  
7  
8  
9  
10  
11  
12  
13  
14  
15  
16  
17  
18  
19  
20  
21  
22  
23  
24  
25  
26  
27  
28  
29  
30  
31  
32  
33  
34  
35  
36  
37  
38  
39  
40  
41  
42  
43  
44  
45  
46  
47  
48  
49  
50  
51  
52  
53  
54  
55  
56  
57  
58  
59  
60

e

For peer review only

1  
2  
3  
4  
5  
6  
7  
8  
9  
10  
11  
12  
13  
14  
15  
16  
17  
18  
19  
20  
21  
22  
23  
24  
25  
26  
27  
28  
29  
30  
31  
32  
33  
34  
35  
36  
37  
38  
39  
40  
41  
42  
43  
44  
45  
46  
47  
48  
49  
50  
51  
52  
53  
54  
55  
56  
57  
58  
59  
60

For peer review only

1  
2  
3  
4  
5  
6  
7  
8  
9  
10  
11  
12  
13  
14  
15  
16  
17  
18  
19  
20  
21  
22  
23  
24  
25  
26  
27  
28  
29  
30  
31  
32  
33  
34  
35  
36  
37  
38  
39  
40  
41  
42  
43  
44  
45  
46  
47  
48  
49  
50  
51  
52  
53  
54  
55  
56  
57  
58  
59  
60

For peer review only

1  
2  
3  
4  
5  
6  
7  
8  
9  
10  
11  
12  
13  
14  
15  
16  
17  
18  
19  
20  
21  
22  
23  
24  
25  
26  
27  
28  
29  
30  
31  
32  
33  
34  
35  
36  
37  
38  
39  
40  
41  
42  
43  
44  
45  
46  
47  
48  
49  
50  
51  
52  
53  
54  
55  
56  
57  
58  
59  
60

ent

For peer review only

| ICD-10 code | Term                                              |
|-------------|---------------------------------------------------|
| Z94.0       | Kidney transplant status                          |
| Z94.1       | Heart transplant status                           |
| Z94.2       | Lung transplant status                            |
| Z94.3       | Heart and lungs transplant status                 |
| Z94.4       | Liver transplant status                           |
| Z94.6       | Bone transplant status                            |
| Z94.7       | Corneal transplant status                         |
| Z94.9       | Transplanted organ and tissue status, unspecified |
| Z94.82      | Intestine transplant status                       |
| Z94.83      | Pancreas transplant status                        |
| Z94.89      | Other transplanted organ and tissue status        |
| Z94.84      | Stem cell transplant status                       |
| Z94.81      | Bone marrow transplant status                     |

|    | OPCS code | Term                                                    |
|----|-----------|---------------------------------------------------------|
| 1  |           |                                                         |
| 2  |           |                                                         |
| 3  | K01.1     | Transplantation of heart and lung                       |
| 4  | K02.1     | Other transplantation of heart                          |
| 5  | G68.1     | Transplantation of ileum                                |
| 6  |           |                                                         |
| 7  | M01.4     | Transplantation of kidney                               |
| 8  | M01.5     | Transplantation of kidney                               |
| 9  | M01.3     | Transplantation of kidney                               |
| 10 | M01.2     | Transplantation of kidney                               |
| 11 | G26.1     | Transplantation of stomach                              |
| 12 |           |                                                         |
| 13 | B17.1     | Transplantation of thymus gland                         |
| 14 | M01.1     | Transplantation of kidney                               |
| 15 | E53.1     | Transplantation of lung                                 |
| 16 | M02.6     | Total excision of kidney                                |
| 17 | M02.7     | Total excision of kidney                                |
| 18 |           |                                                         |
| 19 | J55.3     | Total excision of pancreas                              |
| 20 | M08.4     | Other open operations on kidney                         |
| 21 | J01.2     | Transplantation of liver                                |
| 22 | K02.3     | Other transplantation of heart                          |
| 23 |           |                                                         |
| 24 | J01.1     | Transplantation of liver                                |
| 25 | J01.5     | Transplantation of liver                                |
| 26 | B17.8     | Transplantation of thymus gland                         |
| 27 | E53.8     | Transplantation of lung                                 |
| 28 | G26.8     | Transplantation of stomach                              |
| 29 |           |                                                         |
| 30 | G68.8     | Transplantation of ileum                                |
| 31 | J01.8     | Transplantation of liver                                |
| 32 | J54.8     | Transplantation of pancreas                             |
| 33 | K01.8     | Transplantation of heart and lung                       |
| 34 | K02.8     | Other transplantation of heart                          |
| 35 |           |                                                         |
| 36 | M01.8     | Transplantation of kidney                               |
| 37 | M17.8     | Interventions associated with transplantation of kidney |
| 38 | K02.4     | Other transplantation of heart                          |
| 39 | M17.4     | Interventions associated with transplantation of kidney |
| 40 | J54.5     | Transplantation of pancreas                             |
| 41 | J01.3     | Transplantation of liver                                |
| 42 |           |                                                         |
| 43 | K02.5     | Other transplantation of heart                          |
| 44 | K01.2     | Transplantation of heart and lung                       |
| 45 | K02.6     | Other transplantation of heart                          |
| 46 | E53.3     | Transplantation of lung                                 |
| 47 | E53.2     | Transplantation of lung                                 |
| 48 |           |                                                         |
| 49 | J54.4     | Transplantation of pancreas                             |
| 50 | J01.4     | Transplantation of liver                                |
| 51 | J54.1     | Transplantation of pancreas                             |
| 52 | J72.1     | Other operations on spleen                              |
| 53 |           |                                                         |
| 54 | J54.3     | Transplantation of pancreas                             |
| 55 | J54.2     | Transplantation of pancreas                             |
| 56 | B17.9     | Transplantation of thymus gland                         |
| 57 | E53.9     | Transplantation of lung                                 |
| 58 | G26.9     | Transplantation of stomach                              |
| 59 | G68.9     | Transplantation of ileum                                |
| 60 | J01.9     | Transplantation of liver                                |



|    |       |                                                         |
|----|-------|---------------------------------------------------------|
| 1  |       |                                                         |
| 2  | J54.9 | Transplantation of pancreas                             |
| 3  | K01.9 | Transplantation of heart and lung                       |
| 4  | K02.9 | Other transplantation of heart                          |
| 5  | M01.9 | Transplantation of kidney                               |
| 6  | M17.9 | Interventions associated with transplantation of kidney |
| 7  |       |                                                         |
| 8  | K02.2 | Other transplantation of heart                          |
| 9  | B17   | Transplantation of thymus gland                         |
| 10 | E53   | Transplantation of lung                                 |
| 11 | G26   | Transplantation of stomach                              |
| 12 |       |                                                         |
| 13 | G68   | Transplantation of ileum                                |
| 14 | J01   | Transplantation of liver                                |
| 15 | J54   | Transplantation of pancreas                             |
| 16 | K01   | Transplantation of heart and lung                       |
| 17 | K02   | Other transplantation of heart                          |
| 18 |       |                                                         |
| 19 | M01   | Transplantation of kidney                               |
| 20 | M17   | Interventions associated with transplantation of kidney |
| 21 | W34   | Graft of bone marrow                                    |
| 22 | W34.1 | Graft of bone marrow                                    |
| 23 | W34.2 | Graft of bone marrow                                    |
| 24 | W34.3 | Graft of bone marrow                                    |
| 25 | W34.4 | Graft of bone marrow                                    |
| 26 | W34.5 | Graft of bone marrow                                    |
| 27 | W34.6 | Graft of bone marrow                                    |
| 28 | W34.8 | Graft of bone marrow                                    |
| 29 | W34.9 | Graft of bone marrow                                    |
| 30 |       |                                                         |
| 31 | W99   | Graft of bone marrow                                    |
| 32 | W99.1 | Graft of bone marrow                                    |
| 33 | W99.8 | Graft of bone marrow                                    |
| 34 | W99.9 | Graft of bone marrow                                    |
| 35 |       |                                                         |
| 36 | X33.4 | Other blood transfusion                                 |
| 37 | X33.5 | Other blood transfusion                                 |
| 38 | X33.6 | Other blood transfusion                                 |
| 39 |       |                                                         |
| 40 |       |                                                         |
| 41 |       |                                                         |
| 42 |       |                                                         |
| 43 |       |                                                         |
| 44 |       |                                                         |
| 45 |       |                                                         |
| 46 |       |                                                         |
| 47 |       |                                                         |
| 48 |       |                                                         |
| 49 |       |                                                         |
| 50 |       |                                                         |
| 51 |       |                                                         |
| 52 |       |                                                         |
| 53 |       |                                                         |
| 54 |       |                                                         |
| 55 |       |                                                         |
| 56 |       |                                                         |
| 57 |       |                                                         |
| 58 |       |                                                         |
| 59 |       |                                                         |
| 60 |       |                                                         |

|    | Medcodeid         | Term                                                            |
|----|-------------------|-----------------------------------------------------------------|
| 1  |                   |                                                                 |
| 2  |                   |                                                                 |
| 3  | 293635019         | Extreme obesity with alveolar hypoventilation                   |
| 4  | 356968010         | Morbid obesity                                                  |
| 5  | 2160062010        | Body mass index 40+ - severely obese                            |
| 6  | 881831000006116   | Hyperalimantation incl.obesity                                  |
| 7  |                   |                                                                 |
| 8  | 1900331000006113  | Obese class III (body mass index equal to or greater than 40.0) |
| 9  | 1991711000006112  | Reason for influenza vaccine - BMI 40+                          |
| 10 | 2350261000000115  | Obese class II (body mass index 35.0 - 39.9)                    |
| 11 | 6763391000006114  | Body mass index 40+ - morbidly obese                            |
| 12 |                   |                                                                 |
| 13 | 6763401000006111  | BMI (body mass index) 40+ - severely obese                      |
| 14 | 8024931000006112  | Severe obesity                                                  |
| 15 | 12113181000006115 | Obese class II                                                  |
| 16 | 13926671000006119 | Obese class III                                                 |
| 17 |                   |                                                                 |
| 18 |                   |                                                                 |
| 19 |                   |                                                                 |
| 20 |                   |                                                                 |
| 21 |                   |                                                                 |
| 22 |                   |                                                                 |
| 23 |                   |                                                                 |
| 24 |                   |                                                                 |
| 25 |                   |                                                                 |
| 26 |                   |                                                                 |
| 27 |                   |                                                                 |
| 28 |                   |                                                                 |
| 29 |                   |                                                                 |
| 30 |                   |                                                                 |
| 31 |                   |                                                                 |
| 32 |                   |                                                                 |
| 33 |                   |                                                                 |
| 34 |                   |                                                                 |
| 35 |                   |                                                                 |
| 36 |                   |                                                                 |
| 37 |                   |                                                                 |
| 38 |                   |                                                                 |
| 39 |                   |                                                                 |
| 40 |                   |                                                                 |
| 41 |                   |                                                                 |
| 42 |                   |                                                                 |
| 43 |                   |                                                                 |
| 44 |                   |                                                                 |
| 45 |                   |                                                                 |
| 46 |                   |                                                                 |
| 47 |                   |                                                                 |
| 48 |                   |                                                                 |
| 49 |                   |                                                                 |
| 50 |                   |                                                                 |
| 51 |                   |                                                                 |
| 52 |                   |                                                                 |
| 53 |                   |                                                                 |
| 54 |                   |                                                                 |
| 55 |                   |                                                                 |
| 56 |                   |                                                                 |
| 57 |                   |                                                                 |
| 58 |                   |                                                                 |
| 59 |                   |                                                                 |
| 60 |                   |                                                                 |

For peer review only

| ICD-10 code | Term                                          |
|-------------|-----------------------------------------------|
| E66.2       | Extreme obesity with alveolar hypoventilation |
| E66.8       | Other obesity, morbid obesity                 |
| Z68.4       | Body mass index [BMI] 40 or greater, adult    |
| Z68.35      | Body mass index [BMI] 35.0-35.9, adult        |
| Z68.36      | Body mass index [BMI] 36.0-36.9, adult        |
| Z68.37      | Body mass index [BMI] 37.0-37.9, adult        |
| Z68.38      | Body mass index [BMI] 38.0-38.9, adult        |

For peer review only

1  
2 Medcodeid  
3 1485215015  
4 940171000006115  
5 940181000006117  
6 940191000006119  
7 940201000006116  
8 1822141000006115  
9 1882331000006116  
10 2189071000000110  
11 8136471000006118  
12 294806015  
13 294815010  
14 294828015  
15 294840015  
16 294874016  
17 401866015  
18 401869010  
19 82151000006114  
20 82171000006116  
21 367051000006112  
22 367071000006119  
23 424531000006118  
24 424541000006111  
25 424551000006113  
26 424571000006115  
27 424671000006116  
28 424681000006118  
29 513691000006116  
30 513701000006116  
31 513721000006114  
32 513731000006112  
33 1715191000006112  
34 1715781000006110  
35 1755901000006112  
36 1755911000006110  
37 2729751000000118  
38 2729991000000112  
39 2957311000006113  
40 3087971000006112  
41 3468391000006115  
42 3743451000006110  
43 3767531000006119  
44 5106081000006110  
45 7127651000006115  
46 7127661000006118  
47 8232571000006118  
48 8232591000006117  
49 294919015  
50 296083012  
51 401859016

For peer review only

1 401860014  
2  
3 362221000006114  
4 362271000006110  
5 362381000006115  
6 362391000006117  
7 362421000006113  
8 882301000006112  
9 1872381000006112  
10 1975621000006117  
11 1975671000006116  
12 1975681000006118  
13 1975691000006115  
14 1975711000006117  
15 1975731000006111  
16 1975761000006119  
17 1975781000006112  
18 1975821000006118  
19 1975851000006110  
20 1975871000006117  
21 1975901000006117  
22 2730111000000111  
23 5568191000006118  
24 7696261000006113  
25 130538010  
26 28758018  
27 43595011  
28 52897013  
29 71539017  
30 107878010  
31 114616017  
32 132503015  
33 294725013  
34 294726014  
35 294727017  
36 294728010  
37 294730012  
38 294731011  
39 294734015  
40 294735019  
41 294736018  
42 294737010  
43 294738017  
44 294739013  
45 294741014  
46 294742019  
47 294743012  
48 294744018  
49 294750011  
50 294751010  
51 294753013

For peer review only

1  
2 294754019  
3 294757014  
4 294758016  
5 294760019  
6 294764011  
7 294765012  
8 294766013  
9 294767016  
10 294768014  
11 294769018  
12 294771018  
13 294773015  
14 294787015  
15 294788013  
16 294789017  
17 294790014  
18 296022017  
19 296031017  
20 296040018  
21 296095012  
22 296096013  
23 346955013  
24 401763015  
25 401764014  
26 401855010  
27 1219653018  
28 1234861017  
29 78531000006116  
30 123611000006110  
31 155141000006116  
32 155161000006117  
33 169061000006112  
34 366571000006114  
35 367951000006113  
36 367971000006115  
37 368001000006112  
38 368011000006110  
39 370451000006110  
40 370631000006117  
41 371031000006115  
42 376251000006112  
43 378051000006119  
44 388741000006110  
45 395021000006111  
46 395031000006114  
47 398631000006113  
48 418221000006118  
49 418261000006112  
50 423041000006119  
51 423271000006116

For peer review only

1  
2 423471000006117  
3 423731000006114  
4 423741000006116  
5 424841000006113  
6 424931000006113  
7 425501000006113  
8 425511000006111  
9 425521000006115  
10 425541000006110  
11 425551000006112  
12 425561000006114  
13 425571000006119  
14 425581000006116  
15 425601000006114  
16 425631000006118  
17 425641000006111  
18 425651000006113  
19 425671000006115  
20 425681000006117  
21 425691000006119  
22 425701000006119  
23 425711000006116  
24 426881000006111  
25 456731000006115  
26 456801000006115  
27 556631000006116  
28 819351000006115  
29 882281000006113  
30 882291000006111  
31 1971471000006117  
32 1972011000006110  
33 1972261000006117  
34 1972861000006118  
35 1973051000006118  
36 1973581000006116  
37 1973831000006119  
38 1974351000006118  
39 1974391000006112  
40 1974431000006118  
41 1974451000006113  
42 1974481000006117  
43 1974541000006112  
44 1974601000006111  
45 1974611000006114  
46 1974621000006118  
47 1974641000006113  
48 1974671000006117  
49 1974721000006114  
50 1974751000006117  
51 1974781000006113  
52  
53  
54  
55  
56  
57  
58  
59  
60

For peer review only

1  
2 1974801000006112  
3 1974831000006116  
4 1974861000006113  
5 1974921000006111  
6 1975051000006119  
7  
8 1975141000006117  
9 1975191000006114  
10 1975211000006110  
11 1975231000006116  
12 1975261000006113  
13 1975281000006115  
14 1975301000006116  
15 1975321000006114  
16 1975351000006117  
17 1975381000006113  
18 1975401000006113  
19 1975431000006117  
20 1975441000006110  
21 1975481000006116  
22 1975491000006118  
23 1975501000006114  
24 1975521000006116  
25 1975551000006113  
26 1975571000006115  
27 1975641000006112  
28 1975751000006116  
29 1975771000006114  
30 1975801000006111  
31 1975831000006115  
32 1975841000006113  
33 1975911000006119  
34 1976001000006113  
35 1976061000006114  
36 1976101000006112  
37 1976121000006119  
38 1976141000006114  
39 1976171000006118  
40 1976881000006112  
41 1976891000006110  
42 1976901000006114  
43 1976911000006112  
44 1976931000006118  
45 1976941000006111  
46 1976951000006113  
47 1976961000006110  
48 3000261000006112  
49 3068121000006112  
50 3118041000006112  
51 3137261000006111  
52 3862661000006112

For peer review only



1  
2 3946141000006118  
3 4082931000006110  
4 4539931000006112  
5 4763641000006116  
6 4763911000006114  
7 4763921000006118  
8 5023901000006110  
9 5248961000006113  
10 5517971000006118  
11 6890801000006117  
12 12480451000006112  
13 10122017  
14 119579013  
15 294662017  
16 294673012  
17 294675017  
18 294676016  
19 294693016  
20 294714016  
21 294721016  
22 294897018  
23 294902017  
24 294913019  
25 294917018  
26 294924017  
27 294941015  
28 294944011  
29 346897015  
30 401768012  
31 401771016  
32 401772011  
33 401862018  
34 1227584015  
35 215851000000112  
36 223601000000119  
37 223611000000117  
38 300411000000110  
39 300931000000113  
40 359091000006115  
41 359161000006110  
42 362781000006116  
43 362981000006119  
44 366551000006116  
45 367061000006114  
46 367991000006119  
47 370981000006112  
48 376271000006119  
49 376281000006116  
50 377461000006113  
51 379901000006113  
52  
53  
54  
55  
56  
57  
58  
59  
60

For peer review only

1  
2 389451000006110  
3 389681000006116  
4 394681000006119  
5 394691000006116  
6 396771000006117  
7 396781000006119  
8 396801000006115  
9 397581000006111  
10 397621000006111  
11 397641000006116  
12 397661000006117  
13 397691000006113  
14 404041000006111  
15 424071000006112  
16 424281000006115  
17 424511000006112  
18 426951000006112  
19 426981000006116  
20 428441000006116  
21 476741000006111  
22 630831000006113  
23 753331000006118  
24 853201000006116  
25 1821481000006114  
26 2502581000000119  
27 3504751000006114  
28 3627341000006115  
29 3630121000006110  
30 3630151000006118  
31 4763211000006118  
32 4763231000006112  
33 4764511000006119  
34 5023531000006114  
35 5023541000006116  
36 5106071000006112  
37 6348061000006115  
38 6515001000006117  
39 6519941000006116  
40 7766271000006113  
41 7790241000006117  
42 7822921000006111  
43 8028531000006112  
44 8089301000006110  
45 8342781000006115  
46 8365411000006116  
47 12115591000006111  
48 12736721000006110  
49 14333601000006113  
50 296110017  
51 882321000006119

For peer review only

1  
2 2730071000000117  
3 2730091000000118  
4 294802018  
5 294803011  
6 294804017  
7 294805016  
8 294807012  
9 294809010  
10 294810017  
11 294811018  
12 294812013  
13 294813015  
14 294818012  
15 294847017  
16 294848010  
17 294849019  
18 294850019  
19 294858014  
20 294860011  
21 294891017  
22 294892012  
23 294893019  
24 294896010  
25 296118012  
26 401765010  
27 401864017  
28 1780205015  
29 2157096015  
30 182861000006110  
31 182871000006115  
32 367081000006116  
33 367111000006110  
34 367151000006111  
35 396071000006119  
36 396741000006113  
37 396761000006112  
38 396791000006116  
39 424661000006111  
40 513741000006119  
41 513801000006112  
42 789221000006116  
43 851691000006114  
44 882311000006110  
45 1971601000006113  
46 1972091000006117  
47 1972351000006113  
48 1972961000006114  
49 1973061000006116  
50 1973121000006111  
51 1973751000006115

For peer review only

1  
2 1973991000006111  
3 1974791000006111  
4 1975411000006111  
5 1975701000006115  
6 3006671000006118  
7  
8 3447781000006113  
9 5023961000006111  
10 5649431000006118  
11 5688921000006114  
12 5688931000006112  
13  
14 12059211000006119  
15 294861010  
16 294862015  
17 294863013  
18 294868016  
19 294869012  
20 294870013  
21 294871012  
22 294872017  
23 294877011  
24 294880012  
25 294881011  
26 294882016  
27 294883014  
28 294888017  
29 294895014  
30 296135011  
31 401865016  
32 82091000006116  
33 367091000006118  
34 367101000006112  
35 367121000006119  
36 367161000006113  
37 398541000006116  
38 513711000006118  
39 513751000006117  
40 513871000006118  
41 701051000006118  
42 701071000006111  
43 1785851000006110  
44 1785861000006112  
45 1785871000006117  
46 1972101000006111  
47 1975931000006113  
48 1975941000006115  
49 2652251000000113  
50 3854401000006113  
51 4767311000006117  
52 5023451000006115  
53 5435901000006117  
54  
55  
56  
57  
58  
59  
60

For peer review only

1 5933701000006116  
2 6891981000006111  
3 8041781000006111  
4 8235161000006110  
5 12059201000006117  
6 12059221000006110  
7 13716031000006110  
8 13911951000006118  
9 1780423014  
10 1780425019  
11 851561000006119  
12 940461000006119  
13 940471000006114  
14 1807681000006114  
15 4082431000006119  
16 5513141000006117  
17 6047261000006111  
18 6650041000006113  
19 13796551000006113  
20 3062551000006110  
21 5253131000006114  
22 5272841000006115  
23 4764871000006114  
24 295017014  
25 296254015  
26 296255019  
27 269821000006113  
28 400321000006113  
29 4764881000006112  
30 94597012  
31 251631011  
32 317233013  
33 317235018  
34 372208017  
35 363321000006111  
36 366521000006113  
37 960281000006115  
38 3423851000006118  
39 3799251000006119  
40 3799261000006117  
41 12717671000006110  
42 1222496015  
43 366541000006118  
44 368051000006111  
45 368061000006113  
46 527421000006116  
47 3027091000006119  
48 3468921000006116  
49 8039381000006110  
50 295436010  
51  
52  
53  
54  
55  
56  
57  
58  
59  
60

For peer review only

1  
2 295437018  
3 295451018  
4 295452013  
5 296361019  
6 296379015  
7 401889011  
8 1780181019  
9 577901000006119  
10 664031000000110  
11 882611000006115  
12 988931000006112  
13 1620911000006112  
14 1664151000006114  
15 1764491000006116  
16 1776641000006112  
17 1911761000006111  
18 2308361000000115  
19 2451711000000111  
20 2652391000000113  
21 5550181000006114  
22 6025191000006115  
23 6452531000006114  
24 7079921000006119  
25 7230101000006110  
26 7567401000006119  
27 8274831000006110  
28 8440231000006115  
29 14232971000006112  
30 424681000006118  
31 424671000006116  
32 424551000006113  
33 424541000006111  
34 379771000006116  
35 424571000006115  
36 396081000006116  
37 424531000006118  
38 1755911000006110  
39 1755901000006112  
40 1715191000006112  
41 1715781000006110  
42 1715181000006114  
43 1715771000006112  
44 426981000006116  
45 426961000006114  
46 426951000006112  
47 426921000006115  
48 401869010  
49 882831000006113  
50 223741000000112  
51 426891000006114

For peer review only

1  
2 401866015  
3 425691000006119  
4 425561000006114  
5 425501000006113  
6 423041000006119  
7  
8 295536013  
9 138421012  
10 294918011  
11 294917018  
12  
13 294845013  
14 182801000006114  
15 294840015  
16 182771000006112  
17 294838013  
18 294837015  
19  
20 294836012  
21 182721000006111  
22 294832014  
23 142521000006110  
24 294828015  
25 142541000006115  
26 474171000006112  
27 401766011  
28 613791000006115  
29 294647019  
30 294646011  
31 294644014  
32 294642013  
33 1839581000006112  
34 1975191000006114  
35 1975211000006110  
36 1975231000006116  
37 1975261000006113  
38 1975281000006115  
39 1975321000006114  
40 1976921000006116  
41 388071000006116  
42  
43  
44  
45  
46  
47  
48  
49  
50  
51  
52  
53  
54  
55  
56  
57  
58  
59  
60

For peer review only

|    |                                                                                        |
|----|----------------------------------------------------------------------------------------|
| 1  |                                                                                        |
| 2  | Term                                                                                   |
| 3  | On severe mental illness register                                                      |
| 4  | Severe mental illness monitoring administration                                        |
| 5  | Severe mental illness monitoring invite 1                                              |
| 6  | Severe mental illness monitoring invite 2                                              |
| 7  | Severe mental illness monitoring invite 3                                              |
| 8  | Severe mental illness - enhanced services administration                               |
| 9  | Severe mental illness - enhanced service completed                                     |
| 10 | Severe mental illness enhanced services administration                                 |
| 11 | Patient suffering from severe mental impairment under Mental Health Act 1983           |
| 12 | Single manic episode, severe, with psychosis                                           |
| 13 | Recurrent manic episodes, severe, with psychosis                                       |
| 14 | Single major depressive episode, severe, with psychosis                                |
| 15 | Recurrent major depressive episodes, severe, with psychosis                            |
| 16 | Mixed bipolar affective disorder, severe, with psychosis                               |
| 17 | [X]Severe depressive episode without psychotic symptoms                                |
| 18 | [X]Severe depressive episode with psychotic symptoms                                   |
| 19 | Severe bipolar disorder without psychotic features                                     |
| 20 | Severe bipolar disorder with psychotic features                                        |
| 21 | Severe depressed bipolar I disorder without psychotic features                         |
| 22 | Bipolar affective disorder, currently manic, severe, with psychosis                    |
| 23 | [X]Recurr depress disorder cur epi severe without psyc sympt                           |
| 24 | [X]Recurr severe episodes/major depression+psychotic symptom                           |
| 25 | [X]Recurr severe episodes/psychogenic depressive psychosis                             |
| 26 | [X]Recurrent depress disorder cur epi severe with psyc symp                            |
| 27 | [X]Recurrent severe episodes of psychotic depression                                   |
| 28 | Recurrent reactive depressive episodes, severe, with psychosis                         |
| 29 | Severe manic bipolar I disorder without psychotic features                             |
| 30 | Bipolar affect disord, currently manic,severe with psychosis                           |
| 31 | Bipolar affect disord, now depressed, severe with psychosis                            |
| 32 | Bipolar affect disord, now depressed, severe, no psychosis                             |
| 33 | Severe major depression with psychotic features                                        |
| 34 | Severe major depression without psychotic features                                     |
| 35 | [X]Single major depressive episode, severe, with psychosis, psychosis in remission     |
| 36 | [X]Recurrent major depressive episodes, severe, with psychosis, psychosis in remission |
| 37 | Recurrent depression with current severe episode and psychotic features                |
| 38 | Recurrent depression with current severe episode without psychotic features            |
| 39 | Severe recurrent major depression with psychotic features                              |
| 40 | Severe recurrent major depression without psychotic features                           |
| 41 | Severe bipolar I disorder, most recent episode depressed with psychotic features       |
| 42 | Severe major depression, single episode, without psychotic features                    |
| 43 | Severe major depression, single episode, with psychotic features, mood-congruent       |
| 44 | Severe postnatal psychosis                                                             |
| 45 | Severe major depression, single episode, with psychotic features                       |
| 46 | Major depressive disorder, single episode, severe with psychotic features              |
| 47 | Single major depressive episode, severe, with psychosis, psychosis in remission        |
| 48 | Recurrent major depressive episodes, severe, with psychosis, psychosis in remission    |
| 49 | Acute hysterical psychosis                                                             |
| 50 | [X]Other acute and transient psychotic disorders                                       |
| 51 | [X]Other acute predominantly delusional psychotic disorders                            |



1 [X]Acute and transient psychotic disorder, unspecified  
2 [X]Acute / subacute infective psychosis  
3 Acute transient psychotic disorder  
4 Acute polymorphic psychotic disorder co-occurrent with symptoms of schizophrenia  
5 Acute polymorphic psychotic disorder without symptoms of schizophrenia  
6 Acute schizophrenia-like psychotic disorder  
7 Acute schizo affective psychosis  
8 Accom status - NHS acute psychiatric ward  
9 Acute polymorphic psychot disord without symp of schizoph, without associated acute stress  
10 Acute polymorphic psychot disord without symp of schizoph, with associated acute stress  
11 Acute polymorphic psychot disord with symp of schizophren, without associated acute stress  
12 Acute polymorphic psychot disord with symp of schizophren, with associated acute stress  
13 Acute schizophrenia-like psychotic disorder, without associated acute stress  
14 Acute schizophrenia-like psychotic disorder, with associated acute stress  
15 Other acute predominantly delusional psychotic disorders, without associated acute stress  
16 Other acute predominantly delusional psychotic disorders, with associated acute stress  
17 Other acute and transient psychotic disorders, without associated acute stress  
18 Other acute and transient psychotic disorders, with associated acute stress  
19 Acute and transient psychotic disorder, unspecified, without associated acute stress  
20 Acute and transient psychotic disorder, unspecified, with associated acute stress  
21 Acute predominantly delusional psychotic disorder  
22 Acute polymorphic psychotic disorder  
23 Acute polymorphic psychotic disorder with symptoms of schizophrenia  
24 Nervous breakdown  
25 Subchronic schizophrenia  
26 Residual schizophrenia  
27 Chronic paranoid schizophrenia  
28 Subchronic catatonic schizophrenia  
29 Paranoid schizophrenia  
30 Chronic catatonic schizophrenia  
31 Subchronic paranoid schizophrenia  
32 Schizophrenic disorders  
33 Schizophrenia simplex  
34 Simple schizophrenia  
35 Unspecified schizophrenia  
36 Acute exacerbation of subchronic schizophrenia  
37 Acute exacerbation of chronic schizophrenia  
38 Simple schizophrenia NOS  
39 Unspecified hebephrenic schizophrenia  
40 Subchronic hebephrenic schizophrenia  
41 Chronic hebephrenic schizophrenia  
42 Acute exacerbation of subchronic hebephrenic schizophrenia  
43 Acute exacerbation of chronic hebephrenic schizophrenia  
44 Hebephrenic schizophrenia NOS  
45 Catatonic schizophrenia  
46 [X]Schizophrenic flexibilatis cerea  
47 Unspecified catatonic schizophrenia  
48 Acute exacerbation of subchronic catatonic schizophrenia  
49 Acute exacerbation of chronic catatonic schizophrenia  
50 Catatonic schizophrenia NOS

- 1 Unspecified paranoid schizophrenia
- 2 Acute exacerbation of subchronic paranoid schizophrenia
- 3 Acute exacerbation of chronic paranoid schizophrenia
- 4 Paranoid schizophrenia NOS
- 5 Latent schizophrenia
- 6 Unspecified latent schizophrenia
- 7 Subchronic latent schizophrenia
- 8 Chronic latent schizophrenia
- 9 Acute exacerbation of subchronic latent schizophrenia
- 10 Acute exacerbation of chronic latent schizophrenia
- 11 Latent schizophrenia NOS
- 12 Cyclic schizophrenia
- 13 Coenesthopathic schizophrenia
- 14 Cenesthopathic schizophrenia
- 15 Other schizophrenia NOS
- 16 Schizophrenia
- 17 [X]Schizophrenia, schizotypal and delusional disorders
- 18 Undifferentiated schizophrenia
- 19 [X]Schizophrenia, unspecified
- 20 [X]Other schizoaffective disorders
- 21 [X]Schizoaffective disorder, unspecified
- 22 Childhood schizophrenia NOS
- 23 Acute schizophrenic episode
- 24 Other schizophrenia
- 25 [X]Other schizophrenia
- 26 Atypical schizophrenia
- 27 Chronic schizophrenic
- 28 Unspecified schizo-affective schizophrenia
- 29 Subchronic schizo-affective schizophrenia
- 30 Schizoaffective schizophrenia
- 31 Schizo-affective schizophrenia NOS
- 32 Restzustand - schizophrenia
- 33 [X]Atypical schizophrenia
- 34 Borderline schizophrenia
- 35 [X]Bouffee delirante with symptoms of schizophrenia
- 36 [X]Brief schizophreniform disorder
- 37 [X]Brief schizophreniform psych
- 38 [X]Catatonic schizophrenia
- 39 [X]Cenesthopathic schizophrenia
- 40 [X]Chronic undifferentiated schizophrenia
- 41 [X]Cyclic schizophrenia
- 42 [X]Disorganised schizophrenia
- 43 [X]Hebephrenic schizophrenia
- 44 [X]Latent schizophrenia
- 45 [X]Latent schizophrenic reaction
- 46 Mixed schizophrenic and affective psychosis
- 47 [X]Paranoid schizophrenia
- 48 [X]Paraphrenic schizophrenia
- 49 [X]Post-schizophrenic depression
- 50 Prepsychotic schizophrenia

1 Prodromal schizophrenia  
 2 [X]Pseudoneurotic schizophrenia  
 3 [X]Pseudopsychopathic schizophrenia  
 4 [X]Residual schizophrenia  
 5 [X]Restzustand schizophrenic  
 6 Schizoaffective disorder, depressive type  
 7 Schizoaffective disorder, manic type  
 8 Schizoaffective disorder, mixed type  
 9 Schizoaffective disorder  
 10 [X]Schizoaffective psychosis NOS  
 11 [X]Schizoaffective psychosis, depressive type  
 12 [X]Schizoaffective psychosis, manic type  
 13 [X]Schizoid disorder of childhood  
 14 [X]Schizophrenia  
 15 [X]Schizophrenia-like psychosis in epilepsy  
 16 [X]Schizophrenic catalepsy  
 17 [X]Schizophrenic catatonia  
 18 [X]Schizophrenic reaction  
 19 [X]Schizophreniform disord NOS  
 20 [X]Schizophreniform psychosis, depressive type  
 21 [X]Schizophreniform psychosis, manic type  
 22 [X]Schizophrenifrm psychos NOS  
 23 [X]Simple schizophrenia  
 24 Acute exacerbation of chronic schizo-affective schizophrenia  
 25 Acute exacerbation subchronic schizo-affective schizophrenia  
 26 Chronic schizoaffective schizophrenia  
 27 Hebephrenic schizophrenia  
 28 Schizophrenic psychoses NOS  
 29 Schizophrenic psychoses  
 30 Mental & behav dis due to use opioids: psychotic disorder, schizophrenia-like  
 31 Mental & behav dis due to hallucinogens: psychotic disord, schizophrenia-like  
 32 Mental & behav dis due to cannabinoids: psychotic disordr, schizophrenia-like  
 33 Mental & behav dis due to seds/hypntcs: psychotic disordr, schizophrenia-like  
 34 Mental & behav dis due to vol solvents: psychotic disordr, schizophrenia-like  
 35 Mental & behav dis due to use cocaine: psychotic disorder, schizophrenia-like  
 36 Ment/behav dis mlti drug use/oth psyc sbs: psychotc dis, schizophrenia-like  
 37 Paranoid schizophrenia, continuous  
 38 Paranoid schizophrenia, episodic with progressive deficit  
 39 Paranoid schizophrenia, episodic with stable deficit  
 40 Paranoid schizophrenia, episodic remittent  
 41 Paranoid schizophrenia, incomplete remission  
 42 Paranoid schizophrenia, course uncertain, period of observation too short  
 43 Hebephrenic schizophrenia, continuous  
 44 Hebephrenic schizophrenia, episodic with progressive deficit  
 45 Hebephrenic schizophrenia, episodic with stable deficit  
 46 Hebephrenic schizophrenia, episodic remittent  
 47 Hebephrenic schizophrenia, incomplete remission  
 48 Hebephrenic schizophrenia, course uncertain, period of observation too short  
 49 Catatonic schizophrenia, continuous  
 50 Catatonic schizophrenia, episodic with progressive deficit

1 Catatonic schizophrenia, episodic with stable deficit  
2 Catatonic schizophrenia, episodic remittent  
3 Catatonic schizophrenia, incomplete remission  
4 Catatonic schizophrenia, course uncertain, period of observation too short  
5 Undifferentiated schizophrenia, incomplete remission  
6 Mental & behav dis due to use alcohol: psychotic disorder, schizophrenia-like  
7 Post-schizophrenic depression, continuous  
8 Post-schizophrenic depression, episodic with progressive deficit  
9 Post-schizophrenic depression, episodic with stable deficit  
10 Post-schizophrenic depression, episodic remittent  
11 Post-schizophrenic depression, incomplete remission  
12 Post-schizophrenic depression, complete remission  
13 Post-schizophrenic depression, course uncertain, period of observation too short  
14 Residual schizophrenia, continuous  
15 Residual schizophrenia, episodic with progressive deficit  
16 Residual schizophrenia, episodic with stable deficit  
17 Residual schizophrenia, episodic remittent  
18 Residual schizophrenia, incomplete remission  
19 Residual schizophrenia, course uncertain, period of observation too short  
20 Simple schizophrenia, continuous  
21 Simple schizophrenia, episodic with progressive deficit  
22 Simple schizophrenia, episodic with stable deficit  
23 Simple schizophrenia, episodic remittent  
24 Simple schizophrenia, incomplete remission  
25 Simple schizophrenia, course uncertain, period of observation too short  
26 Other schizophrenia, continuous  
27 Other schizophrenia, episodic with progressive deficit  
28 Other schizophrenia, episodic with stable deficit  
29 Other schizophrenia, episodic remittent  
30 Other schizophrenia, incomplete remission  
31 Other schizophrenia, course uncertain, period of observation too short  
32 Schizophrenia, unspecified, continuous  
33 Schizophrenia, unspecified, episodic with progressive deficit  
34 Schizophrenia, unspecified, episodic with stable deficit  
35 Schizophrenia, unspecified, episodic remittent  
36 Schizophrenia, unspecified, incomplete remission  
37 Schizophrenia, unspecified, course uncertain, period of observation too short  
38 Paranoid schizophrenia, other  
39 Hebephrenic schizophrenia, other  
40 Catatonic schizophrenia, other  
41 Undifferentiated schizophrenia, other  
42 Residual schizophrenia, other  
43 Simple schizophrenia, other  
44 Other schizophrenia, other  
45 Schizophrenia, unspecified, other  
46 Schizotypal disorder  
47 Disorganised schizophrenia  
48 Schizoaffective disorder, bipolar type  
49 Undifferentiated schizophrenia in remission  
50 Chronic schizophrenia

1 Schizophreniform disorder  
2 Schizophrenic reaction  
3 History of schizophrenia  
4 Acute exacerbation of chronic disorganised schizophrenia  
5 Acute exacerbation of subchronic schizoaffective schizophrenia  
6 Acute exacerbation of chronic schizoaffective schizophrenia  
7 Post-schizophrenic depression  
8 Schizophrenic prodrome  
9 Mixed schizophrenic and affective psychosis  
10 Late onset schizophrenia  
11 [X]Schizophrenia, schizotypal and delusional disorders  
12 Brief reactive psychosis  
13 Disintegrative psychosis  
14 Korsakov's alcoholic psychosis with peripheral neuritis  
15 Other alcoholic psychosis  
16 Other alcoholic psychosis NOS  
17 Alcoholic psychosis NOS  
18 Drug psychosis NOS  
19 Postpartum psychosis  
20 Chronic organic psychosis NOS  
21 Affective psychosis  
22 Other affective psychosis NOS  
23 Paranoid psychosis  
24 Reactive depressive psychosis  
25 Psychogenic paranoid psychosis  
26 Disintegrative psychosis NOS  
27 Borderline psychosis of childhood  
28 Presbyophrenic psychosis  
29 Chronic paranoid psychosis  
30 Non-organic psychosis NOS  
31 Child psychosis NOS  
32 [X]Unspecified nonorganic psychosis  
33 [V]Personal history of manic-depressive psychosis  
34 [X]Paranoid psychosis  
35 Manic psychosis  
36 Non-organic psychosis  
37 H/O: psychosis  
38 Referral to psychosis early intervention service  
39 [X] Presenile psychosis NOS  
40 [X] Senile psychosis NOS  
41 [X]Affective psychosis NOS  
42 [X]Alcoholic psychosis NOS  
43 [X]Atypical childhood psychosis  
44 Psychosis and severe depression co-occurrent and due to bipolar affective disorder  
45 [X]Brief reactive psychosis NOS  
46 [X]Chronic hallucinatory psychosis  
47 [X]Cycloid psychosis  
48 Cycloid psychosis  
49 [X]Disintegrative psychosis  
50 [X]Epileptic psychosis NOS

- 1
- 2 [X]Hysterical psychosis
- 3 [X]Infantile psychosis
- 4 Korsakoff's psychosis
- 5 [X]Korsakov's psychosis, nonalcoholic
- 6 [X] Manic-depressive psychosis, depressed type without psychotic symptoms
- 7 [X]Manic-depress psychosis,depressed type+psychotic symptoms
- 8 Manic-depressive psychosis
- 9 Cannabis-induced psychosis
- 10 Alcohol-induced psychosis
- 11 Cocaine-induced psychosis
- 12 Opioid-induced psychosis
- 13 Volatile inhalant-induced psychosis
- 14 [X]Organic psychosis NOS
- 15 [X]Psychogenic paranoid psychosis
- 16 [X]Puerperal psychosis NOS
- 17 [X]Reactive psychosis
- 18 [X]Single episode of psychogenic depressive psychosis
- 19 [X]Single episode of reactive depressive psychosis
- 20 [X]Symbiotic psychosis
- 21 Alcohol-induced psychosis
- 22 Drug psychosis
- 23 Korsakov alcoholic psychosis
- 24 Obsessional compulsive psychosis
- 25 Possible early psychosis
- 26 CBTp - cognitive behavioural therapy for psychosis
- 27 Induced psychosis
- 28 Psychosis
- 29 Korsakoff psychosis
- 30 Korsakov psychosis
- 31 Drug-induced psychosis
- 32 Drug induced psychosis
- 33 Psychosis with origin in childhood
- 34 Epileptic psychosis
- 35 Psychosis associated with intensive care
- 36 Mild postnatal psychosis
- 37 Senile dementia with psychosis
- 38 Early intervention in psychosis
- 39 Early intervention in psychosis - <1 contact/month
- 40 Cognitive behavioural therapy for psychosis
- 41 Psychosis co-occurrent and due to Parkinson's disease
- 42 Provision of information about psychosis
- 43 Early intervention in psychosis team
- 44 Reactive depressive psychosis, single episode
- 45 Psychoactive substance-induced psychosis
- 46 Family intervention for psychosis
- 47 Referral for cognitive behavioural therapy for psychosis
- 48 FEP - first episode psychosis
- 49 Family intervention for psychosis and bipolar disorder
- 50 Mania
- 51 Mania/hypomania
- 52
- 53
- 54
- 55
- 56
- 57
- 58
- 59
- 60

1 Mania with mood-incongruent psychotic features  
 2 Mania with psychotic features  
 3 Single manic episode, unspecified  
 4 Single manic episode, mild  
 5 Single manic episode, moderate  
 6 Single manic episode, severe  
 7 Single manic episode in partial remission  
 8 Manic disorder, single episode NOS  
 9 Recurrent manic episodes  
 10 Recurrent manic episodes, unspecified  
 11 Recurrent manic episodes, mild  
 12 Recurrent manic episodes, moderate  
 13 Recurrent manic episode NOS  
 14 Manic-depressive - now manic  
 15 Bipolar affective disorder, currently manic, unspecified  
 16 Bipolar affective disorder, currently manic, mild  
 17 Bipolar affective disorder, currently manic, moderate  
 18 Bipolar affective disorder, currently manic, NOS  
 19 Manic-depressive - now depressed  
 20 Other and unspecified manic-depressive psychoses  
 21 Unspecified manic-depressive psychoses  
 22 Atypical manic disorder  
 23 Other and unspecified manic-depressive psychoses NOS  
 24 [X]Other manic episodes  
 25 Manic disorder, single episode  
 26 [X]Manic episode, unspecified  
 27 H/O: manic depressive disorder  
 28 Manic mood  
 29 Recurrent manic episodes, in partial remission  
 30 Recurrent manic episodes, severe  
 31 [X]Bipolar affect disorder cur epi manic wout psychotic symp  
 32 Bipolar affective disorder, current episode hypomanic  
 33 [X]Bipolar disorder, single manic episode  
 34 [X]Manic-depressive reaction  
 35 [X]Manic episode  
 36 [X]Manic stupor  
 37 Manic-depressive illness  
 38 [X]Recurrent manic episodes  
 39 Manic bipolar I disorder in partial remission  
 40 Bipolar affective disorder, current episode manic  
 41 Hypomanic psychoses  
 42 Hypomanic  
 43 Manic-depressive psychoses  
 44 Mental & behav dis due to use opioids: psychotic disorder, predominantly manic symptoms  
 45 Organic manic disorder  
 46 Mental & behav dis due to cannabinoids: psychotic disordr, predominantly manic symptoms  
 47 Mental & behav dis due to seds/hypntcs: psychotic disordr, predominantly manic symptoms  
 48 Mental & behav dis due to hallucinogens: psychotic disord, predominantly manic symptoms  
 49 Mental & behav dis due to vol solvents: psychotic disordr, predominantly manic symptoms  
 50 Mental & behav dis due to use cocaine: psychotic disorder, predominantly manic symptoms



1  
2 Ment/behav dis mlti drug use/oth psyc sbs: psychotc dis, predominantly manic symptoms  
3 Mental & behav dis due to use tobacco: psychotic disorder, predominantly manic symptoms  
4 Mental & behav dis due to use alcohol: psychotic disorder, predominantly manic symptoms  
5 Mental and behav dis due to other stimulants inc caffeine: psychotic dis, predominantly manic symptom  
6 Bipolar I disorder, most recent episode hypomanic  
7 Organic mood disorder of manic type  
8 Manic  
9 Hypomanic mood  
10 Manic behaviour  
11 Manic behavior  
12 Bipolar disorder, most recent episode manic  
13 Bipolar affective disorder, currently depressed, unspecified  
14 Bipolar affective disorder, currently depressed, mild  
15 Bipolar affective disorder, currently depressed, moderate  
16 Bipolar affective disorder, currently depressed, NOS  
17 Mixed bipolar affective disorder  
18 Mixed bipolar affective disorder, unspecified  
19 Mixed bipolar affective disorder, mild  
20 Mixed bipolar affective disorder, moderate  
21 Mixed bipolar affective disorder, NOS  
22 Unspecified bipolar affective disorder  
23 Unspecified bipolar affective disorder, unspecified  
24 Mild bipolar disorder  
25 Moderate bipolar disorder  
26 Unspecified bipolar affective disorder, NOS  
27 Mixed bipolar I disorder  
28 [X]Bipolar affective disorder, unspecified  
29 [X]Other bipolar affective disorders  
30 Bipolar disorder in partial remission  
31 [X]Bipolar affect disorder cur epi mild or moderate depressn  
32 Bipolar affective disorder  
33 [X]Bipolar affective disorder, current episode mixed  
34 [X]Bipolar II disorder  
35 Bipolar affective disorder , current episode mixed  
36 Depressed bipolar I disorder in partial remission  
37 Bipolar affective disorder, current episode depression  
38 Bipolar disorder  
39 Mixed bipolar affective disorder, partial/unspec remission  
40 Mixed bipolar affective disorder, severe  
41 Bipolar I disorder  
42 Bipolar II disorder  
43 [X]Bipolar II disorder  
44 Organic bipolar affective disorder  
45 Bipolar affect disorder cur epi mild or moderate depressn, without somatic syndrome  
46 Bipolar affect disorder cur epi mild or moderate depressn, with somatic syndrome  
47 Signposting to Bipolar UK  
48 Bipolar 2 disorder  
49 Bipolar affective disorder, current episode mixed  
50 Organic bipolar disorder  
51 Bipolar



1 Profile of mood states, bipolar  
2 Referral for bipolar disorder  
3 Rapid cycling bipolar I disorder  
4 Mixed bipolar affective disorder, in partial remission  
5 Bipolar disorder, most recent episode depression  
6 Bipolar affective disorder, most recent episode mixed  
7 Bipolar disorder caused by drug  
8 Rapid cycling bipolar II disorder  
9 Thoughts of deliberate self harm  
10 Intent of deliberate self harm with detailed plans  
11 Risk of deliberate self harm  
12 H/O: deliberate self harm outside prison  
13 H/O: deliberate self harm within prison  
14 High risk of deliberate self harm  
15 Thoughts of self harm  
16 Suicide and self harm  
17 History of deliberate self harm  
18 At risk for deliberate self harm  
19 Obsessional thoughts of causing self harm  
20 Self-induced vomiting  
21 Self-induced purging to lose weight  
22 Self-induced purging  
23 OCD - Obsessive-compulsive disorder  
24 Obsessive-compulsive disorder NOS  
25 [X]Other obsessive-compulsive disorders  
26 [X]Obsessive-compulsive disorder, unspecified  
27 Obsessive-compulsive disorder  
28 [X]Obsessive - compulsive disorder  
29 Obsessive compulsive disorder  
30 Anorexia nervosa  
31 H/O: anorexia nervosa  
32 [D]Anorexia  
33 [D]Anorexia NOS  
34 Anorexia symptom  
35 [X]Anorexia nervosa  
36 Atypical anorexia nervosa  
37 Anorexia  
38 AN - Anorexia nervosa  
39 Anorexia  
40 Anorexic  
41 [D]Anorexia  
42 Bulimia  
43 Atypical bulimia nervosa  
44 Bulimia nervosa  
45 [X]Bulimia NOS  
46 Bulimia (non-organic overeating)  
47 Bulimia nervosa, purging type  
48 Bulimia nervosa, nonpurging type  
49 History of bulimia nervosa  
50 Other and unspecified non-organic eating disorders

1 Unspecified non-organic eating disorder  
 2 Other specified non-organic eating disorder  
 3 Non-organic eating disorder NOS  
 4 Eating disorder  
 5 [X]Eating disorder, unspecified  
 6 [X]Other eating disorders  
 7 Referral to eating disorders clinic  
 8 Compulsive eating disorder  
 9 Seen in eating disorder clinic  
 10 Eating disorder NOS - psychog.  
 11 Eating disorder NOS - psychog.  
 12 Eating disorders  
 13 Seen in eating disorders clinic  
 14 Referral to eating disorders outreach clinic  
 15 Reason for referral: Eating Disorder  
 16 FACE CARAS - Eating Disorder Schedule (FEDS)  
 17 Suspected binge eating disorder  
 18 Eating disorder care plan  
 19 Signposting to Beat (beating eating disorders) support group  
 20 Eating disorders inventory  
 21 Eating disorder counselling  
 22 Eating disorders management  
 23 Dietary education for eating disorder  
 24 Binge eating disorder  
 25 Eating disorder clinic  
 26 Eating disorders service  
 27 Eating disorder co-occurrent with diabetes mellitus type 1  
 28 Group CBT-ED (cognitive behavioural therapy for eating disorder)  
 29 [X]Recurrent severe episodes/reactive depressive psychosis  
 30 [X]Recurrent severe episodes of psychotic depression  
 31 [X]Recurr severe episodes/psychogenic depressive psychosis  
 32 [X]Recurr severe episodes/major depression+psychotic symptom  
 33 [X]Endogenous depression with psychotic symptoms  
 34 [X]Recurrent depress disorder cur epi severe with psyc symp  
 35 [X]Major depression, recurrent without psychotic symptoms  
 36 [X]Recurr depress disorder cur epi severe without psyc sympt  
 37 Recurrent major depressive episodes, severe, with psychosis, psychosis in remission  
 38 Single major depressive episode, severe, with psychosis, psychosis in remission  
 39 [X]Major depression, severe with psychotic symptoms  
 40 [X]Major depression, severe without psychotic symptoms  
 41 [X]Major depression, moderately severe  
 42 [X]Major depression, mild  
 43 [X]Single episode of reactive depressive psychosis  
 44 [X]Single episode of psychotic depression  
 45 [X]Single episode of psychogenic depressive psychosis  
 46 [X]Single episode of major depression and psychotic symptoms  
 47 [X]Severe depressive episode with psychotic symptoms  
 48 Severe depression  
 49 [X]Single episode major depression w'out psychotic symptoms  
 50 [X]Single episode agitated depressn w'out psychotic symptoms  
 51  
 52  
 53  
 54  
 55  
 56  
 57  
 58  
 59  
 60

1  
2 [X]Severe depressive episode without psychotic symptoms  
3 [X]Schizophreniform psychosis, depressive type  
4 [X]Schizoaffective psychosis, depressive type  
5 [X]Schizoaffective disorder, depressive type  
6 [X]Post-schizophrenic depression  
7 Postviral depression  
8 Agitated depression  
9 Psychotic reactive depression  
10 Reactive depressive psychosis  
11 Recurrent major depressive episode NOS  
12 Recurrent major depressive episodes,partial/unspec remission  
13 Recurrent major depressive episodes, severe, with psychosis  
14 Recurrent major depressive episodes, severe, no psychosis  
15 Recurrent major depressive episodes, moderate  
16 Recurrent major depressive episodes, mild  
17 Recurrent major depressive episodes, unspecified  
18 Recurrent major depressive episode  
19 Single major depressive episode NOS  
20 Single major depressive episode, partial or unspec remission  
21 Single major depressive episode, severe, with psychosis  
22 Single major depressive episode, severe, without psychosis  
23 Agitated depression  
24 Single major depressive episode  
25 Depressive psychoses  
26 Senile dementia with depressive or paranoid features NOS  
27 Senile dementia with depression  
28 Senile dementia with depressive or paranoid features  
29 Presenile dementia with depression  
30 PHQ9 total score 20-27 (severe depression)  
31 Post-schizophrenic depression, continuous  
32 Post-schizophrenic depression, episodic with progressive deficit  
33 Post-schizophrenic depression, episodic with stable deficit  
34 Post-schizophrenic depression, episodic remittent  
35 Post-schizophrenic depression, incomplete remission  
36 Post-schizophrenic depression, course uncertain, period of observation too short  
37 Post-schizophrenic depression, other  
38 [X]Generalized anxiety disorder  
39  
40  
41  
42  
43  
44  
45  
46  
47  
48  
49  
50  
51  
52  
53  
54  
55  
56  
57  
58  
59  
60

1  
2  
3  
4  
5  
6  
7  
8  
9  
10  
11  
12  
13  
14  
15  
16  
17  
18  
19  
20  
21  
22  
23  
24  
25  
26  
27  
28  
29  
30  
31  
32  
33  
34  
35  
36  
37  
38  
39  
40  
41  
42  
43  
44  
45  
46  
47  
48  
49  
50  
51  
52  
53  
54  
55  
56  
57  
58  
59  
60

For peer review only

1  
2  
3  
4  
5  
6  
7  
8  
9  
10  
11  
12  
13  
14  
15  
16  
17  
18  
19  
20  
21  
22  
23  
24  
25  
26  
27  
28  
29  
30  
31  
32  
33  
34  
35  
36  
37  
38  
39  
40  
41  
42  
43  
44  
45  
46  
47  
48  
49  
50  
51  
52  
53  
54  
55  
56  
57  
58  
59  
60

For peer review only

1  
2  
3  
4  
5  
6  
7  
8  
9  
10  
11  
12  
13  
14  
15  
16  
17  
18  
19  
20  
21  
22  
23  
24  
25  
26  
27  
28  
29  
30  
31  
32  
33  
34  
35  
36  
37  
38  
39  
40  
41  
42  
43  
44  
45  
46  
47  
48  
49  
50  
51  
52  
53  
54  
55  
56  
57  
58  
59  
60

For peer review only

1  
2  
3  
4  
5  
6  
7  
8  
9  
10  
11  
12  
13  
14  
15  
16  
17  
18  
19  
20  
21  
22  
23  
24  
25  
26  
27  
28  
29  
30  
31  
32  
33  
34  
35  
36  
37  
38  
39  
40  
41  
42  
43  
44  
45  
46  
47  
48  
49  
50  
51  
52  
53  
54  
55  
56  
57  
58  
59  
60

For peer review only

1  
2  
3  
4  
5  
6  
7  
8  
9  
10  
11  
12  
13  
14  
15  
16  
17  
18  
19  
20  
21  
22  
23  
24  
25  
26  
27  
28  
29  
30  
31  
32  
33  
34  
35  
36  
37  
38  
39  
40  
41  
42  
43  
44  
45  
46  
47  
48  
49  
50  
51  
52  
53  
54  
55  
56  
57  
58  
59  
60

For peer review only



1  
2  
3  
4  
5  
6  
7  
8  
9  
10  
11  
12  
13  
14  
15  
16  
17  
18  
19  
20  
21  
22  
23  
24  
25  
26  
27  
28  
29  
30  
31  
32  
33  
34  
35  
36  
37  
38  
39  
40  
41  
42  
43  
44  
45  
46  
47  
48  
49  
50  
51  
52  
53  
54  
55  
56  
57  
58  
59  
60

For peer review only

1  
2  
3  
4  
5  
6  
7  
8  
9  
10  
11  
12  
13  
14  
15  
16  
17  
18  
19  
20  
21  
22  
23  
24  
25  
26  
27  
28  
29  
30  
31  
32  
33  
34  
35  
36  
37  
38  
39  
40  
41  
42  
43  
44  
45  
46  
47  
48  
49  
50  
51  
52  
53  
54  
55  
56  
57  
58  
59  
60

For peer review only

1  
2  
3  
4  
5  
6  
7  
8  
9  
10  
11  
12  
13  
14  
15  
16  
17  
18  
19  
20  
21  
22  
23  
24  
25  
26  
27  
28  
29  
30  
31  
32  
33  
34  
35  
36  
37  
38  
39  
40  
41  
42  
43  
44  
45  
46  
47  
48  
49  
50  
51  
52  
53  
54  
55  
56  
57  
58  
59  
60

For peer review only

1  
2  
3  
4  
5  
6  
7  
8  
9  
10  
11  
12  
13  
14  
15  
16  
17  
18  
19  
20  
21  
22  
23  
24  
25  
26  
27  
28  
29  
30  
31  
32  
33  
34  
35  
36  
37  
38  
39  
40  
41  
42  
43  
44  
45  
46  
47  
48  
49  
50  
51  
52  
53  
54  
55  
56  
57  
58  
59  
60

ms

For peer review only

1  
2 ICD-10 code  
3 F06.0  
4 F06.1  
5 F06.2  
6 F06.3  
7 F06.4  
8 F06.5  
9 F06.6  
10 F06.6  
11 F10.1  
12 F10.2  
13 F10.3  
14 F10.4  
15 F10.5  
16 F10.6  
17 F10.7  
18 F10.8  
19 F10.9  
20 F10.9  
21 F11.1  
22 F11.2  
23 F11.3  
24 F11.4  
25 F11.5  
26 F11.6  
27 F11.7  
28 F11.8  
29 F11.9  
30 F12.1  
31 F12.2  
32 F12.3  
33 F12.4  
34 F12.5  
35 F12.6  
36 F12.7  
37 F12.8  
38 F12.9  
39 F13.1  
40 F13.2  
41 F13.3  
42 F13.4  
43 F13.5  
44 F13.6  
45 F13.7  
46 F13.8  
47 F13.9  
48 F14.1  
49 F14.2  
50 F14.3  
51 F14.4  
52 F14.5  
53 F14.6  
54  
55  
56  
57  
58  
59  
60

For peer review only

- 1
- 2 F14.7
- 3 F14.8
- 4 F14.9
- 5 F15.1
- 6 F15.2
- 7 F15.2
- 8 F15.3
- 9 F15.4
- 10 F15.5
- 11 F15.6
- 12 F15.7
- 13 F15.7
- 14 F15.8
- 15 F15.9
- 16 F16.1
- 17 F16.2
- 18 F16.3
- 19 F16.3
- 20 F16.4
- 21 F16.5
- 22 F16.6
- 23 F16.7
- 24 F16.8
- 25 F16.8
- 26 F16.9
- 27 F17.1
- 28 F17.2
- 29 F17.3
- 30 F17.4
- 31 F17.4
- 32 F17.5
- 33 F17.6
- 34 F17.7
- 35 F17.8
- 36 F17.8
- 37 F17.9
- 38 F18.1
- 39 F18.2
- 40 F18.3
- 41 F18.4
- 42 F18.4
- 43 F18.5
- 44 F18.6
- 45 F18.7
- 46 F18.8
- 47 F18.8
- 48 F18.9
- 49 F19.1
- 50 F19.2
- 51 F19.3
- 52 F19.4
- 53 F19.5
- 54 F19.5
- 55 F19.6
- 56 F19.7
- 57 F19.8
- 58 F19.9
- 59 F19.9
- 60 F20.0
- F20.1

For peer review only

1  
2 F20.2  
3 F20.3  
4 F20.4  
5 F20.5  
6 F20.6  
7 F20.8  
8 F20.9  
9 F21  
10 F22.0  
11 F22.8  
12 F22.9  
13 F23.0  
14 F23.1  
15 F23.2  
16 F23.3  
17 F23.8  
18 F23.9  
19 F24  
20 F25.0  
21 F25.1  
22 F25.2  
23 F25.8  
24 F25.9  
25 F28  
26 F29  
27 F30.0  
28 F30.1  
29 F30.2  
30 F30.8  
31 F30.9  
32 F31.0  
33 F31.1  
34 F31.2  
35 F31.3  
36 F31.4  
37 F31.5  
38 F31.6  
39 F31.7  
40 F31.8  
41 F31.9  
42 F32.2  
43 F32.3  
44 F32.8  
45 F32.9  
46 F33.2  
47 F33.3  
48 F33.8  
49 F33.9  
50 F34.0  
51 F34.1  
52  
53  
54  
55  
56  
57  
58  
59  
60

For peer review only

- 1
- 2 F34.8
- 3 F34.9
- 4 F38.0
- 5 F38.1
- 6 F38.8
- 7 F38.8
- 8 F39
- 9 F41.0
- 10 F41.1
- 11 F41.2
- 12 F41.3
- 13 F41.8
- 14 F41.9
- 15 F41.9
- 16 F42.0
- 17 F42.1
- 18 F42.2
- 19 F42.2
- 20 F42.8
- 21 F42.9
- 22 F43.1
- 23 F44.0
- 24 F44.1
- 25 F44.1
- 26 F44.2
- 27 F44.3
- 28 F44.4
- 29 F44.5
- 30 F44.6
- 31 F44.6
- 32 F44.7
- 33 F44.8
- 34 F44.9
- 35 F48.1
- 36 F48.8
- 37 F48.8
- 38 F48.9
- 39 F50.0
- 40 F50.1
- 41 F50.2
- 42 F50.3
- 43 F50.3
- 44 F50.8
- 45 F50.9
- 46 F53.1
- 47 F53.8
- 48 F53.8
- 49 F53.9
- 50
- 51
- 52
- 53
- 54
- 55
- 56
- 57
- 58
- 59
- 60

For peer review only



| 1  | Prodcodeid       | Term                                        |
|----|------------------|---------------------------------------------|
| 2  | 840741000033115  | Loxapine 10mg capsules                      |
| 3  | 840841000033113  | Loxapine 25mg capsules                      |
| 4  | 840941000033117  | Loxapine 50mg capsules                      |
| 5  | 842041000033117  | Loxapac 10mg capsules                       |
| 6  | 842141000033118  | Loxapac 25mg capsules                       |
| 7  | 842241000033113  | Loxapac 50mg capsules                       |
| 8  | 923041000033117  | Molipaxin 50mg capsules                     |
| 9  | 923241000033113  | Molipaxin 100mg capsules                    |
| 10 | 929541000033113  | Molipaxin 50mg/5ml oral liquid              |
| 11 | 929841000033110  | Molipaxin CR 150mg tablets                  |
| 12 | 938741000033111  | Molipaxin 150mg tablets                     |
| 13 | 498441000033112  | Efexor XL 75mg capsules                     |
| 14 | 498541000033113  | Efexor XL 150mg capsules                    |
| 15 | 499041000033111  | Efexor 37.5mg tablets                       |
| 16 | 499141000033110  | Efexor 75mg tablets                         |
| 17 | 499241000033115  | Efexor 50mg tablets                         |
| 18 | 1509241000033110 | Venlafaxine 150mg modified-release capsules |
| 19 | 1509341000033117 | Venlafaxine 75mg modified-release capsules  |
| 20 | 1512241000033119 | Venlafaxine 37.5mg tablets                  |
| 21 | 1512341000033112 | Venlafaxine 75mg tablets                    |
| 22 | 1512441000033118 | Venlafaxine 50mg tablets                    |
| 23 | 4498541000033116 | Venlafaxine 37.5mg/5ml oral suspension      |
| 24 | 4823541000033110 | Venlafaxine 75mg modified-release tablets   |
| 25 | 4823641000033111 | Venlafaxine 150mg modified-release tablets  |
| 26 | 4823741000033119 | ViePax XL 75mg tablets                      |
| 27 | 4823841000033112 | ViePax XL 150mg tablets                     |
| 28 | 4896941000033117 | ViePax 75mg tablets                         |
| 29 | 4897041000033116 | ViePax 37.5mg tablets                       |
| 30 | 4899541000033115 | Vensir XL 75mg capsules                     |
| 31 | 4899641000033119 | Vensir XL 150mg capsules                    |
| 32 | 4936641000033111 | Venaxx XL 75mg capsules                     |
| 33 | 4936741000033119 | Venaxx XL 150mg capsules                    |
| 34 | 4957841000033111 | Politid XL 75mg capsules                    |
| 35 | 4957941000033115 | Politid XL 150mg capsules                   |
| 36 | 5008041000033112 | Venlafaxine 75mg/5ml oral solution          |
| 37 | 5052741000033119 | Venlafaxine 225mg modified-release tablets  |
| 38 | 5052841000033112 | Venlalic XL 225mg tablets                   |
| 39 | 5052941000033116 | Venlalic XL 150mg tablets                   |
| 40 | 5053041000033114 | Venlalic XL 75mg tablets                    |
| 41 | 5812541000033115 | Venlablue XL 75mg capsules                  |
| 42 | 5812641000033119 | Venlablue XL 150mg capsules                 |
| 43 | 5813141000033117 | Alventa XL 150mg capsules                   |
| 44 | 5813341000033119 | Alventa XL 75mg capsules                    |
| 45 | 5896341000033112 | Depefex XL 75mg capsules                    |
| 46 | 5896441000033118 | Depefex XL 150mg capsules                   |
| 47 | 6000441000033115 | Venlafaxine 37.5mg/5ml oral solution        |
| 48 | 6029641000033116 | Venlaneo XL 150mg capsules                  |
| 49 | 6029741000033113 | Venlaneo XL 75mg capsules                   |
| 50 | 6161741000033111 | Venlafaxine 37.5mg modified-release tablets |

|    |                   |                                                 |
|----|-------------------|-------------------------------------------------|
| 1  |                   |                                                 |
| 2  | 6161841000033118  | Venlalic XL 37.5mg tablets                      |
| 3  | 8298641000033115  | Sunveniz XL 150mg tablets                       |
| 4  | 8298741000033112  | Sunveniz XL 75mg tablets                        |
| 5  | 8867941000033118  | Venlafaxine 75mg/5ml oral suspension            |
| 6  | 8885441000033118  | Venlafaxine 37.5mg modified-release capsules    |
| 7  | 8885541000033117  | Venlablue XL 37.5mg capsules                    |
| 8  |                   |                                                 |
| 9  | 10730041000033110 | Venlafaxine 225mg modified-release capsules     |
| 10 | 10730141000033114 | Efexor XL 225mg capsules                        |
| 11 | 11693641000033117 | Vensir XL 225mg capsules                        |
| 12 |                   |                                                 |
| 13 | 12194541000033118 | Vencarm XL 150mg capsules                       |
| 14 | 12194641000033117 | Vencarm XL 225mg capsules                       |
| 15 | 12194741000033114 | Vencarm XL 37.5mg capsules                      |
| 16 | 12194841000033116 | Vencarm XL 75mg capsules                        |
| 17 | 12389941000033119 | Venlasov XL 75mg capsules                       |
| 18 |                   |                                                 |
| 19 | 12390341000033114 | Venlasov XL 150mg capsules                      |
| 20 | 12605341000033111 | Venladex XL 75mg tablets                        |
| 21 | 12605441000033117 | Venladex XL 150mg tablets                       |
| 22 | 12605541000033116 | Venladex XL 225mg tablets                       |
| 23 |                   |                                                 |
| 24 | 12641541000033113 | Venzip XL 150mg capsules                        |
| 25 | 12641641000033114 | Venzip XL 75mg capsules                         |
| 26 | 12901141000033114 | Majoven XL 75mg capsules                        |
| 27 | 12901241000033119 | Majoven XL 150mg capsules                       |
| 28 | 13318341000033119 | Venlafaxine 300mg modified-release tablets      |
| 29 | 13318441000033113 | Venlalic XL 300mg tablets                       |
| 30 |                   |                                                 |
| 31 | 13916241000033115 | Venlafaxine 37.5mg/5ml oral solution sugar free |
| 32 | 13916341000033113 | Venlafaxine 75mg/5ml oral solution sugar free   |
| 33 | 60941000033114    | Amoxapine 50mg tablets                          |
| 34 | 61041000033116    | Amoxapine 100mg tablets                         |
| 35 | 87641000033116    | Asendis 100mg tablets                           |
| 36 | 87941000033111    | Asendis 50mg tablets                            |
| 37 |                   |                                                 |
| 38 | 60841000033118    |                                                 |
| 39 | 61141000033117    |                                                 |
| 40 | 87741000033113    |                                                 |
| 41 | 87841000033115    |                                                 |
| 42 |                   |                                                 |
| 43 | 173741000033115   |                                                 |
| 44 | 558041000033118   |                                                 |
| 45 | 558141000033119   |                                                 |
| 46 | 262041000033115   | Clomipramine 10mg capsules                      |
| 47 | 262141000033116   | Clomipramine 25mg capsules                      |
| 48 | 262241000033111   | Clomipramine 50mg capsules                      |
| 49 | 284741000033110   | Clomipramine 25mg/5ml oral solution             |
| 50 | 285741000033111   | Clomipramine 75mg modified-release tablets      |
| 51 | 4431541000033115  | Clomipramine 50mg/5ml oral suspension           |
| 52 |                   |                                                 |
| 53 | 275441000033113   |                                                 |
| 54 | 430141000033112   |                                                 |
| 55 | 1066541000033115  |                                                 |
| 56 | 472141000033110   | Dothapax 25 capsules                            |
| 57 | 479641000033111   | Dothapax 75 tablets                             |
| 58 |                   |                                                 |
| 59 | 1111541000033117  | Prothiaden 25mg capsules                        |
| 60 | 1111641000033116  | Prepadine 25mg capsules                         |

|    |                   |                                                |
|----|-------------------|------------------------------------------------|
| 1  |                   |                                                |
| 2  | 1135541000033110  | Prothiaden 75mg tablets                        |
| 3  | 1135941000033116  | Prepadine 75mg tablets                         |
| 4  | 3088941000033118  | Dosulepin 25mg capsules                        |
| 5  | 3089041000033110  | Dosulepin 75mg tablets                         |
| 6  |                   |                                                |
| 7  | 3089141000033114  | Dosulepin 25mg/5ml oral solution               |
| 8  | 3089241000033119  | Dosulepin 75mg/5ml oral solution               |
| 9  | 5891041000033116  | Dosulepin 25mg/5ml oral suspension             |
| 10 | 5992241000033114  | Dosulepin 75mg/5ml oral suspension             |
| 11 | 473041000033119   | Doxepin 10mg capsules                          |
| 12 | 473141000033115   | Doxepin 25mg capsules                          |
| 13 | 473241000033110   | Doxepin 50mg capsules                          |
| 14 | 473341000033117   | Doxepin 75mg capsules                          |
| 15 |                   |                                                |
| 16 | 1294541000033115  | Sinequan 10mg capsules                         |
| 17 | 1294641000033119  | Sinequan 25mg capsules                         |
| 18 | 1294741000033111  | Sinequan 50mg capsules                         |
| 19 | 1294841000033118  | Sinequan 75mg capsules                         |
| 20 |                   |                                                |
| 21 | 1603341000033112  | Doxepin 5% cream                               |
| 22 | 1712041000033111  | Xepin 5% cream                                 |
| 23 | 4010441000033114  | Sinepin 25mg capsules                          |
| 24 | 4010541000033110  | Sinepin 50mg capsules                          |
| 25 | 4954041000033114  | Doxepin 50mg/5ml oral solution                 |
| 26 |                   |                                                |
| 27 | 749541000033115   |                                                |
| 28 | 896541000033118   |                                                |
| 29 |                   |                                                |
| 30 | 754241000033115   | Imipramine 25mg tablets                        |
| 31 | 755541000033119   | Imipramine 10mg tablets                        |
| 32 | 1389441000033112  | Surmontil 50mg capsules                        |
| 33 | 1396741000033112  | Surmontil 10mg tablets                         |
| 34 | 1396841000033119  | Surmontil 25mg tablets                         |
| 35 | 1449441000033113  | Tofranil 25mg/5ml syrup                        |
| 36 | 1450841000033117  | Tofranil 25mg tablets                          |
| 37 |                   |                                                |
| 38 | 1454741000033115  | Trimipramine 50mg capsules                     |
| 39 | 1471341000033116  | Trimipramine 10mg tablets                      |
| 40 | 1471441000033110  | Trimipramine 25mg tablets                      |
| 41 |                   |                                                |
| 42 | 5328741000033117  | Imipramine 25mg/5ml oral solution              |
| 43 | 5454141000033118  | Imipramine 25mg/5ml oral solution sugar free   |
| 44 | 626241000033115   | Gamanil 70mg tablets                           |
| 45 | 849241000033115   | Lofepamine 70mg/5ml oral suspension sugar free |
| 46 | 850141000033116   | Lofepamine 70mg tablets                        |
| 47 |                   |                                                |
| 48 | 2078841000033114  | Lomont 70mg/5ml oral suspension                |
| 49 | 2215541000033118  | Feprapax 70mg tablets                          |
| 50 | 5996641000033111  | Lofepamine 70mg/5ml oral solution              |
| 51 | 5996741000033119  | Lofepamine 70mg/5ml oral suspension            |
| 52 |                   |                                                |
| 53 | 1454641000033112  | Trazodone 50mg capsules                        |
| 54 | 1455241000033113  | Trazodone 100mg capsules                       |
| 55 | 1461941000033113  | Trazodone 50mg/5ml oral solution sugar free    |
| 56 | 1462241000033110  | Trazodone 150mg modified-release tablets       |
| 57 | 1473641000033113  | Trazodone 150mg tablets                        |
| 58 | 12476541000033119 | Trazodone 100mg/5ml oral solution sugar free   |
| 59 | 13444241000033119 | Trazodone 50mg tablets                         |
| 60 | 13444341000033112 | Trazodone 100mg tablets                        |

|    |                   |                                                                   |
|----|-------------------|-------------------------------------------------------------------|
| 1  |                   |                                                                   |
| 2  | 787141000033110   | Isocarboxazid 10mg tablets                                        |
| 3  | 870041000033117   |                                                                   |
| 4  | 868841000033115   | Manerix 150mg tablets                                             |
| 5  | 868941000033111   | Manerix 300mg tablets                                             |
| 6  |                   |                                                                   |
| 7  | 937241000033118   | Moclobemide 150mg tablets                                         |
| 8  | 937841000033119   | Moclobemide 300mg tablets                                         |
| 9  | 955241000033110   | Nardil 15mg tablets                                               |
| 10 | 1079341000033111  | Phenelzine 15mg tablets                                           |
| 11 | 13719241000033117 | Phenelzine 15mg capsules                                          |
| 12 |                   |                                                                   |
| 13 | 13747441000033117 | Phenelzine 15mg capsules                                          |
| 14 | 13747541000033116 | Phenelzine 15mg capsules                                          |
| 15 | 1469441000033116  | Tranylcypromine 10mg tablets                                      |
| 16 | 1040841000033112  |                                                                   |
| 17 | 5077041000033116  | Agomelatine 25mg tablets                                          |
| 18 | 5077141000033117  | Valdoxan 25mg tablets                                             |
| 19 |                   |                                                                   |
| 20 | 12470041000033110 | Comfizz Level I waistband with silicone grip extra large/XX large |
| 21 | 489741000033113   | Dutonin 100mg tablets                                             |
| 22 | 489841000033115   | Dutonin 200mg tablets                                             |
| 23 | 966141000033116   | Nefazodone 100mg tablets                                          |
| 24 |                   |                                                                   |
| 25 | 966241000033111   | Nefazodone 200mg tablets                                          |
| 26 | 490041000033118   | Dutonin tablets treatment initiation pack                         |
| 27 | 496741000033118   | Edronax 4mg tablets                                               |
| 28 | 10616941000033112 | Vortioxetine 5mg tablets                                          |
| 29 | 10617041000033113 | Vortioxetine 10mg tablets                                         |
| 30 |                   |                                                                   |
| 31 | 10617141000033112 | Vortioxetine 20mg tablets                                         |
| 32 | 10617241000033117 | Brintellix 5mg tablets                                            |
| 33 | 10617341000033110 | Brintellix 10mg tablets                                           |
| 34 | 10617441000033116 | Brintellix 20mg tablets                                           |
| 35 |                   |                                                                   |
| 36 |                   |                                                                   |
| 37 |                   |                                                                   |
| 38 |                   |                                                                   |
| 39 |                   |                                                                   |
| 40 |                   |                                                                   |
| 41 |                   |                                                                   |
| 42 |                   |                                                                   |
| 43 |                   |                                                                   |
| 44 |                   |                                                                   |
| 45 |                   |                                                                   |
| 46 |                   |                                                                   |
| 47 |                   |                                                                   |
| 48 |                   |                                                                   |
| 49 |                   |                                                                   |
| 50 |                   |                                                                   |
| 51 |                   |                                                                   |
| 52 |                   |                                                                   |
| 53 |                   |                                                                   |
| 54 |                   |                                                                   |
| 55 |                   |                                                                   |
| 56 |                   |                                                                   |
| 57 |                   |                                                                   |
| 58 |                   |                                                                   |
| 59 |                   |                                                                   |
| 60 |                   |                                                                   |

| Medcodeid         | Term                                                     |
|-------------------|----------------------------------------------------------|
| 71184010          | Nursing home                                             |
| 248842015         | Nursing home attendant                                   |
| 250560019         | Lives in a nursing home                                  |
| 285209012         | Seen in nursing home                                     |
| 449801010         | Discharge to nursing home                                |
| 1488499011        | Other residential care homes managed by local authority  |
| 1488500019        | Other residential care home man voluntary/private agents |
| 62241000000112    | Nursing home visit note                                  |
| 296261000006113   | Nursing home birth                                       |
| 296351000006117   | Nursing or other home                                    |
| 406371000000117   | Lives in care home                                       |
| 530521000000114   | Provision of continuing care in nursing home             |
| 1009771000006114  | Lives in a registered adult care home                    |
| 1552711000000110  | Patient died in care home                                |
| 1583741000006116  | Provision of continuing care in nursing home             |
| 1692851000000118  | Admission to nursing home                                |
| 1775751000006110  | Source of community referral: Care Home                  |
| 1777721000006111  | Activity location: Residential Care Home                 |
| 1777731000006114  | Activity location: Nursing Home                          |
| 1872341000006118  | Accom status - mental health registered care home        |
| 1872471000006118  | Accom status - non-mental health registered care home    |
| 1872581000006116  | Accom status - nursing home for older persons            |
| 1920601000006115  | Care home visit for annual patient review                |
| 1920611000006117  | Care home visit for mid-year patient review              |
| 1920731000006119  | Weekly care home ward round                              |
| 1951031000006114  | Discharge to care home                                   |
| 1961541000006115  | Referred by care home                                    |
| 2290511000000115  | Care home visit                                          |
| 2290551000000116  | Care home visit for initial patient assessment           |
| 2290591000000112  | Care home visit for follow-up patient review             |
| 2340151000000110  | Care home enhanced services administration               |
| 2587751000000117  | Referred by care home                                    |
| 3187751000006110  | NH - Nursing home                                        |
| 5959551000006111  | Discharge to private nursing home                        |
| 5997731000006114  | Private nursing home                                     |
| 7224961000006115  | Fall in nursing home                                     |
| 8053871000006115  | Provision of nursing home care                           |
| 8074901000006115  | Patient transfer to nursing home                         |
| 12738601000006111 | Seen by clinical pharmacist in care home                 |
| 13072971000006116 | Living temporarily in care home                          |

1 Andersen et al (2023)  
2 Classification as defined by England's Deputy Chief Medical Officer  
3 Down's syndrome and other genetic disorders  
4 Solid cancer  
5 Haematological diseases and recipients of haematological stem cell transplants  
6 Renal disease, stage 4 or 5  
7 Liver disease as cirrhosis  
8 Solid organ transplant recipients  
9 Immune-mediated inflammatory disorders  
10 Immune deficiencies  
11 HIV/AIDS  
12 Rare neurological and severe complex life-limiting neurodisability conditions  
13  
14  
15  
16

17 Description of sheet abbreviations:

18 nhs\_ to reflect NHS Highest Risk criteria code list

19 \_XX\_ to reflect the concept

20 \_\_m to reflect medcodeid, \_icd to reflect ICD-10 codes, \_p to reflect procodeid or \_opcs to reflect OPCS procodeid

23 Format of sheets:

24 medcodeid and procodeid are stored as text, not integers, as per CPRD suggestions.  
25  
26  
27  
28  
29  
30  
31  
32  
33  
34  
35  
36  
37  
38  
39  
40  
41  
42  
43  
44  
45  
46  
47  
48  
49  
50  
51  
52  
53  
54  
55  
56  
57  
58  
59  
60

| Medcodeid list | ICD-10 code list | Prodcodeid list | OPCS code list |
|----------------|------------------|-----------------|----------------|
| nhs_dow_m      | nhs_dow_icd      | X               | X              |
| nhs_sol_m      | nhs_sol_icd      | X               | X              |
| nhs_hae_m      | nhs_hae_icd      | nhs_hae_p       | X              |
| nhs_ren_m      | nhs_ren_icd      | X               | X              |
| nhs_cir_m      | nhs_cir_icd      | X               | X              |
| nhs_sot_m      | nhs_sot_icd      | X               | nhs_sot_opcs   |
| nhs_iid_m      | nhs_iid_icd      | nhs_iid_p       | X              |
| nhs_id_m       | nhs_id_m         | X               | X              |
| nhs_hiv_m      | nhs_hiv_icd      | X               | X              |
| nhs_neu_m      | nhs_neu_icd      | X               | X              |

list

For peer review only

| 1  | Medcodeid        | Term                                            |
|----|------------------|-------------------------------------------------|
| 2  | 378493013        | Down's syndrome NOS                             |
| 3  | 378494019        | Partial trisomy 21 in Down's syndrome           |
| 4  | 2159902018       | Suspected Downs syndrome                        |
| 5  | 628281000006114  | Down's syndrome                                 |
| 6  | 628321000006115  | Down's screening blood test abnormal            |
| 7  | 893481000006117  | Down's syndrome                                 |
| 8  | 1009531000006118 | Cause of learning disabilities: Down's syndrome |
| 9  | 1776611000006113 | Reason for referral: Downs Syndrome             |
| 10 | 1922491000006113 | Down syndrome body mass index centile           |
| 11 | 2376321000000116 | Down's syndrome height centile                  |
| 12 | 2376331000000119 | Down's syndrome weight centile                  |
| 13 | 3161041000006119 | Down syndrome                                   |
| 14 | 3161061000006115 | Downs syndrome                                  |
| 15 | 81676016         | Trisomy 4p syndrome                             |
| 16 | 116814019        | 15q partial trisomy syndrome                    |
| 17 | 121311016        | 10q partial trisomy syndrome                    |
| 18 | 128696013        | Trisomy 9p syndrome                             |
| 19 | 315403019        | Partial trisomy syndromes                       |
| 20 | 315404013        | Major partial trisomy                           |
| 21 | 315405014        | Minor partial trisomy                           |
| 22 | 315406010        | Partial trisomy syndrome NOS                    |
| 23 | 315413010        | Trisomy and partial trisomy of autosome         |
| 24 | 378491010        | Pseudotrismy 18                                 |
| 25 | 378497014        | Partial trisomy 18 in Edward's syndrome         |
| 26 | 378500015        | Partial trisomy 13 in Patau's syndrome          |
| 27 | 1224878018       | Trisomy 21 NOS                                  |
| 28 | 3528203016       | Trisomy 21                                      |
| 29 | 88351000006114   | Trisomy 21, meiotic nondisjunction              |
| 30 | 88361000006111   | Trisomy 21, mitotic nondisjunction              |
| 31 | 88371000006116   | Trisomy 21- mitotic nondisjunction mosaicism    |
| 32 | 88381000006118   | Trisomy 21, translocation                       |
| 33 | 117831000006117  | Suspect trisomy 21 foetus                       |
| 34 | 222121000000113  | Trisomy 21                                      |
| 35 | 1786411000006115 | 4p partial trisomy syndrome                     |
| 36 | 1786421000006111 | 9p partial trisomy syndrome                     |
| 37 | 2108171000000119 | Trisomy 9 mosaic syndrome                       |
| 38 | 3161031000006112 | Complete trisomy 21 syndrome                    |
| 39 | 4830941000006112 | Trisomy 21- meiotic nondisjunction              |
| 40 | 68472012         | Mongolism                                       |



| ICD-10 code | Term                                           |
|-------------|------------------------------------------------|
| Q90.0       | Trisomy 21, meiotic nondisjunction             |
| Q90.1       | Trisomy 21, mosaicism (mitotic nondisjunction) |
| Q90.2       | Trisomy 21, translocation                      |
| Q90.9       | Down syndrome, unspecified                     |

For peer review only

|    |                   |
|----|-------------------|
| 1  |                   |
| 2  | Medcodeid         |
| 3  | 1009591000006119  |
| 4  | 1014181000006112  |
| 5  | 1014311000006119  |
| 6  | 1014321000006110  |
| 7  | 1014331000006113  |
| 8  | 103180017         |
| 9  | 103875012         |
| 10 | 109371000006115   |
| 11 | 109381000006117   |
| 12 | 109391000006119   |
| 13 | 113381000006118   |
| 14 | 113391000006115   |
| 15 | 113411000006115   |
| 16 | 113765010         |
| 17 | 113768012         |
| 18 | 11777961000006118 |
| 19 | 118291012         |
| 20 | 118574012         |
| 21 | 11878501000006110 |
| 22 | 11902631000006118 |
| 23 | 11903941000006110 |
| 24 | 11903951000006112 |
| 25 | 11903991000006118 |
| 26 | 11904011000006113 |
| 27 | 11904021000006117 |
| 28 | 11904031000006119 |
| 29 | 11904041000006112 |
| 30 | 11904051000006114 |
| 31 | 11904061000006111 |
| 32 | 11904071000006116 |
| 33 | 11904091000006115 |
| 34 | 11904101000006114 |
| 35 | 11904111000006112 |
| 36 | 11904121000006116 |
| 37 | 11904131000006118 |
| 38 | 11904141000006111 |
| 39 | 11904151000006113 |
| 40 | 11904161000006110 |
| 41 | 11904171000006115 |
| 42 | 11904201000006116 |
| 43 | 11904211000006118 |
| 44 | 11904231000006112 |
| 45 | 11904241000006119 |
| 46 | 11904251000006117 |
| 47 | 11904261000006115 |
| 48 | 11904281000006113 |
| 49 | 11904291000006111 |
| 50 | 11904301000006112 |
| 51 | 11904311000006110 |

For peer review only

1 11904531000006110  
2 11904891000006112  
3 11905951000006111  
4 11906051000006117  
5 11906061000006115  
6 11906071000006110  
7 11906231000006119  
8 11906291000006115  
9 11906441000006113  
10 11906521000006119  
11 11906531000006116  
12 11906621000006115  
13 11906631000006117  
14 11906971000006114  
15 11906981000006112  
16 11907071000006113  
17 11907261000006114  
18 11907841000006114  
19 11907871000006118  
20 11908001000006115  
21 11908061000006119  
22 11908071000006114  
23 11908111000006118  
24 11908121000006114  
25 11908181000006113  
26 11908201000006114  
27 11908321000006111  
28 11908461000006111  
29 11908471000006116  
30 11908501000006111  
31 11908511000006114  
32 11908841000006110  
33 11908851000006112  
34 11908881000006116  
35 11908991000006114  
36 11909131000006117  
37 11909301000006111  
38 11909311000006114  
39 11909341000006113  
40 11909351000006110  
41 11909361000006112  
42 11918081000006110  
43 11918121000006112  
44 11918131000006110  
45 11918191000006114  
46 11918201000006112  
47 11918251000006111  
48 11918261000006113  
49 11918281000006115  
50 11918311000006118

For peer review only

1  
2 11919851000006115  
3 11923431000006116  
4 11923481000006115  
5 11925141000006117  
6 11925531000006118  
7 11925551000006113  
8 11925561000006110  
9 11925571000006115  
10 11925581000006117  
11 11925591000006119  
12 11925601000006110  
13 11925611000006113  
14 11925631000006119  
15 11925691000006115  
16 11925701000006115  
17 11925731000006111  
18 11925741000006118  
19 11925761000006119  
20 11925771000006114  
21 11925781000006112  
22 11925821000006118  
23 11925861000006112  
24 11925871000006117  
25 11925881000006119  
26 11925901000006117  
27 11926011000006111  
28 11926961000006110  
29 11928591000006113  
30 11989451000006116  
31 11989471000006114  
32 11989511000006116  
33 11989531000006110  
34 11989541000006117  
35 11989581000006111  
36 11989591000006114  
37 11989701000006113  
38 120463018  
39 12079021000006115  
40 1208876015  
41 1210553016  
42 1210554010  
43 1210561014  
44 1210566016  
45 1210642019  
46 12121681000006119  
47 12121741000006119  
48 1215809015  
49 1215862010  
50 1215896015  
51 1216013019

For peer review only

1  
2 1216064018  
3 1216076018  
4 1216077010  
5 1216078017  
6 1216084019  
7 1216230014  
8 1216343012  
9 1216356017  
10 1216395016  
11 1216406014  
12 1216442018  
13 1216464010  
14 1216486011  
15 1216488012  
16 1216595017  
17 1216598015  
18 1216670013  
19 1216721019  
20 1216731014  
21 1216817017  
22 1216826019  
23 1216834013  
24 1216845011  
25 1216896013  
26 1216922016  
27 1216937017  
28 1217037013  
29 1217274016  
30 1217275015  
31 1217276019  
32 1217360013  
33 1217367011  
34 12188311000006119  
35 12188321000006110  
36 1219467016  
37 1219468014  
38 1219531013  
39 1219533011  
40 1219534017  
41 1219535016  
42 1219537012  
43 1219538019  
44 1219540012  
45 1219789016  
46 1219790013  
47 12201281000006111  
48 12201291000006114  
49 1220205018  
50 1220352014  
51 12204961000006112  
52  
53  
54  
55  
56  
57  
58  
59  
60

For peer review only

1  
2 1220823019  
3 1220825014  
4 1220826010  
5 1221171011  
6 1221209015  
7 1221241014  
8 1221282014  
9 1221446018  
10 1221504012  
11 1222102015  
12 1222167011  
13 1222168018  
14 1222169014  
15 1222170010  
16 1222176016  
17 1222177013  
18 1222182018  
19 1222183011  
20 1222184017  
21 1222189010  
22 1222216017  
23 12222311000006112  
24 1222303015  
25 1222626017  
26 1222660012  
27 1224870013  
28 1225879015  
29 1226380017  
30 1227295013  
31 1227435013  
32 1227517019  
33 1227518012  
34 1227548010  
35 1228188010  
36 1228259019  
37 1228267010  
38 1228349017  
39 1228493018  
40 1228504019  
41 1228506017  
42 1228509012  
43 1228510019  
44 1228513017  
45 1228523014  
46 1228529013  
47 1228530015  
48 1228532011  
49 1228537017  
50 1228538010  
51 1228539019  
52  
53  
54  
55  
56  
57  
58  
59  
60

For peer review only

1  
2 1228540017  
3 1228541018  
4 1228542013  
5 1228543015  
6 1228549016  
7  
8 1228552012  
9 1228553019  
10 1228557018  
11 1228565015  
12  
13 1228566019  
14 1228567011  
15 1228570010  
16 1228575017  
17 1229372013  
18 1229424011  
19 1229453012  
20  
21 1229513011  
22 1229572014  
23 1229592019  
24 1229971014  
25  
26 1230100013  
27 1230106019  
28 1230127012  
29 1230128019  
30 1230234015  
31 1230440012  
32 1230709016  
33 1230800010  
34 1230882017  
35 1231004013  
36 1231028010  
37 1231089017  
38 1231231016  
39 1231237017  
40 1231363012  
41 1231370012  
42 1231413015  
43 1231451015  
44 1231544010  
45 1231622010  
46 1231760012  
47 1231927019  
48 1231967018  
49 1231976013  
50 1232066010  
51 1232189017  
52 1232355013  
53 1232370014  
54 1232438010  
55 1232439019  
56  
57  
58  
59  
60

For peer review only

1  
2 1232482018  
3 1232564019  
4 1232889015  
5 1232905013  
6 1233222010  
7  
8 1233457010  
9 1233536016  
10 1233722011  
11 1233806015  
12  
13 1234006011  
14 1234144017  
15 1234193010  
16 1234296013  
17 1234619014  
18 1234620015  
19 1234621016  
20  
21 1234787012  
22 1234884012  
23 1235052014  
24 1235152011  
25 1235290011  
26 1235301017  
27 1235321016  
28 1235762013  
29 1235785014  
30 1235786010  
31 1235798017  
32 1235875018  
33 1235891015  
34 1235961012  
35  
36 12449811000006113  
37 12450991000006117  
38 12455781000006112  
39 12455811000006114  
40 12455841000006113  
41 12455871000006117  
42 12473091000006110  
43 12483411000006119  
44 12483441000006115  
45 126941000006114  
46 12702541000006115  
47 12702551000006118  
48 12702831000006111  
49 12702841000006118  
50 12703551000006113  
51 12703771000006114  
52 12704581000006119  
53 12704591000006116  
54 12704601000006112  
55 12716281000006114  
56  
57  
58  
59  
60

For peer review only



1 12716931000006116  
2 12718191000006116  
3 12718821000006112  
4 12718971000006119  
5 12718981000006116  
6 12719081000006110  
7 12719091000006113  
8 12719101000006119  
9 12720651000006110  
10 12721091000006119  
11 12721101000006113  
12 12721241000006118  
13 12721271000006114  
14 12721361000006112  
15 12721371000006117  
16 12721381000006119  
17 12722951000006118  
18 12723261000006118  
19 12723281000006111  
20 12723331000006119  
21 12723471000006112  
22 12723521000006110  
23 12724541000006118  
24 12725431000006113  
25 12726621000006116  
26 12726631000006118  
27 12726641000006111  
28 12726691000006119  
29 12728601000006113  
30 12730141000006116  
31 12730301000006115  
32 12731741000006112  
33 12732041000006119  
34 12732221000006117  
35 12732231000006119  
36 12732731000006114  
37 12732791000006113  
38 12732801000006114  
39 12759251000006116  
40 12761761000006119  
41 12762081000006117  
42 12762111000006111  
43 12762121000006115  
44 12762131000006117  
45 12762141000006110  
46 12762151000006112  
47 12762161000006114  
48 12762171000006119  
49 12762181000006116  
50 12762191000006118

For peer review only

1  
2 12762201000006115  
3 12762211000006117  
4 12762221000006113  
5 130662013  
6 134219012  
7 138104014  
8 138122012  
9 139181000000118  
10 139191000000116  
11 140927016  
12 143288017  
13 144849016  
14 146211000006117  
15 146221000006113  
16 1476341013  
17 1478958017  
18 1488429015  
19 1488604019  
20 1488634012  
21 1488663010  
22 1488772013  
23 1488780018  
24 1488781019  
25 1488798019  
26 1488803011  
27 1489328015  
28 1489329011  
29 1489330018  
30 1489331019  
31 1490308014  
32 1490770018  
33 1490806016  
34 1490807013  
35 1494921019  
36 1494922014  
37 151101000006116  
38 151111000006118  
39 151121000006114  
40 151131000006112  
41 151141000006119  
42 151151000006117  
43 151321000006111  
44 151331000006114  
45 151401000006110  
46 151421000006117  
47 151621000006119  
48 152611000006116  
49 153085017  
50 153088015  
51 153089011

For peer review only

1  
2 153099018  
3 153102018  
4 153107012  
5 153111018  
6 153112013  
7 153124018  
8 153129011  
9 153133016  
10 153136012  
11 153140015  
12 153141016  
13 153143018  
14 153146014  
15 153149019  
16 153150019  
17 153151015  
18 153155012  
19 153156013  
20 153157016  
21 153160011  
22 153162015  
23 153169012  
24 153173010  
25 153174016  
26 153180012  
27 153187010  
28 153191017  
29 153193019  
30 153200017  
31 153203015  
32 153218019  
33 153229015  
34 153231012  
35 153239014  
36 153246017  
37 153247014  
38 153248016  
39 153256018  
40 153258017  
41 153265013  
42 153267017  
43 153268010  
44 153272014  
45 153276012  
46 153280019  
47 153282010  
48 153283017  
49 153286013  
50 153288014  
51 153295017

For peer review only

1  
2 153296016  
3 153299011  
4 153300015  
5 153311011  
6 153313014  
7 153317010  
8 153318017  
9 153319013  
10 153320019  
11 153321015  
12 153327016  
13 153332015  
14 153335018  
15 153336017  
16 153337014  
17 153338016  
18 153340014  
19 153343011  
20 153344017  
21 153345016  
22 153348019  
23 153350010  
24 153358015  
25 153364010  
26 153365011  
27 153367015  
28 153376010  
29 153380017  
30 153382013  
31 153386011  
32 153388012  
33 153410011  
34 153422014  
35 154231019  
36 155060012  
37 155068017  
38 155072018  
39 155076015  
40 155078019  
41 155085015  
42 155089014  
43 155090017  
44 155155010  
45 155168019  
46 155175018  
47 155191015  
48 155193017  
49 155206014  
50 155207017  
51 155209019

For peer review only

1  
2 155211011  
3 155218017  
4 155222010  
5 155228014  
6 155231010  
7 155246015  
8 155247012  
9 155259011  
10 155269017  
11 155272012  
12 155287019  
13 155294016  
14 155305011  
15 155308013  
16 155332018  
17 155361017  
18 155364013  
19 155368011  
20 155370019  
21 155402013  
22 155417012  
23 155418019  
24 155421017  
25 155425014  
26 155441010  
27 155444019  
28 155446017  
29 155447014  
30 155449012  
31 155452016  
32 155457010  
33 155458017  
34 155459013  
35 155468010  
36 155473016  
37 155477015  
38 155479017  
39 155483017  
40 155488014  
41 155495017  
42 155501015  
43 155503017  
44 155517014  
45 155520018  
46 155521019  
47 155522014  
48 155525011  
49 155529017  
50 155533012  
51 155534018

For peer review only

1  
2 155536016  
3 155537013  
4 155538015  
5 155539011  
6 155540013  
7 155542017  
8 155545015  
9 155547011  
10 155550014  
11 155552018  
12 155553011  
13 155556015  
14 155582012  
15 155592016  
16 155604019  
17 155607014  
18 155624015  
19 155641018  
20 155669014  
21 155675017  
22 155677013  
23 155681013  
24 155711012  
25 155773015  
26 155879014  
27 155967013  
28 156007019  
29 156169017  
30 1562151000006111  
31 156231017  
32 156237018  
33 156291015  
34 156319016  
35 156375015  
36 156493015  
37 156557015  
38 156585018  
39 156607018  
40 156627017  
41 156699010  
42 156719018  
43 156747019  
44 156765015  
45 156777013  
46 156825010  
47 156883018  
48 156919012  
49 156973018  
50 156977017  
51 156989015  
52  
53  
54  
55  
56  
57  
58  
59  
60

For peer review only

1 156997010  
2  
3 157025019  
4 157481000006111  
5 157491000006114  
6 157501000006118  
7 157511000006115  
8 157521000006111  
9 157531000006114  
10 157541000006116  
11 157551000006119  
12 157561000006117  
13 157571000006112  
14 157581000006110  
15 157591000006113  
16 157601000006117  
17 157611000006119  
18 157621000006110  
19 157631000006113  
20 157641000006115  
21 157651000006118  
22 1576561000006114  
23 157661000006116  
24 1576631000006118  
25 1576661000006110  
26 157671000006111  
27 157681000006114  
28 157691000006112  
29 157701000006112  
30 157711000006110  
31 157721000006119  
32 157731000006116  
33 157732017  
34 157741000006114  
35 157751000006111  
36 157761000006113  
37 157771000006118  
38 157781000006115  
39 157801000006116  
40 157811000006118  
41 157821000006114  
42 157831000006112  
43 157841000006119  
44 157861000006115  
45 157871000006110  
46 157881000006113  
47 157891000006111  
48 157901000006110  
49 157911000006113  
50 157921000006117  
51 157931000006119

For peer review only

1  
2 157941000006112  
3 157951000006114  
4 157961000006111  
5 157971000006116  
6 158091000000113  
7  
8 1626091000006115  
9 1626111000006112  
10 1626191000006119  
11 1626201000006116  
12  
13 1653961000006118  
14 1655261000000116  
15 1660561000000116  
16 1673281000000110  
17 1688911000000114  
18 1694771000006118  
19 1694781000006115  
20 1697891000006116  
21 1699081000006116  
22  
23 170673014  
24 17271015  
25  
26 1728161000006116  
27 173816012  
28 173821010  
29 173823013  
30 173825018  
31 173833017  
32 173941016  
33 173944012  
34 173946014  
35 173950019  
36 174518012  
37 174532014  
38 174562015  
39 174576019  
40 174577011  
41  
42 1745971000006116  
43 1755771000006115  
44 1755801000006118  
45 1755811000006115  
46 1755821000006111  
47  
48 175996013  
49  
50 1761001000006118  
51 1762101000006113  
52 1762111000006111  
53 1770471000006116  
54 1770481000006118  
55 1770491000006115  
56 1770501000006111  
57 177051000006111  
58  
59 1770511000006114  
60

For peer review only



1  
2 1770521000006118  
3 1772971000006112  
4 1772981000006110  
5 177311000006112  
6 1773111000006111  
7 1773121000006115  
8 1773131000006117  
9 1773141000006110  
10 1773151000006112  
11 1773161000006114  
12 1774631000006111  
13 1774711000006113  
14 1774721000006117  
15 1774731000006119  
16 1774741000006112  
17 1774751000006114  
18 1774761000006111  
19 1774771000006116  
20 1775301000006110  
21 1776121000006112  
22 1780314010  
23 1780324019  
24 1780499017  
25 1780500014  
26 1785811000006114  
27 1786811017  
28 1788227011  
29 1803771000006112  
30 1803781000006110  
31 1805901000006116  
32 1806421000006110  
33 1814931000006110  
34 1815011000006116  
35 1815251000006112  
36 1815421000006116  
37 1841511000006115  
38 1841531000006114  
39 1842161000006118  
40 1842171000006113  
41 1842181000006111  
42 1844571000006114  
43 1847541000006113  
44 1859381000006117  
45 1859531000006112  
46 1868351000006110  
47 1870381000006113  
48 1870391000006111  
49 1877231000006117  
50 1884191000006113  
51 1884201000006111

For peer review only

1  
2 1884211000006114  
3 1887221000006112  
4 188741000006119  
5 1908611000006111  
6 1937971000006115  
7 195278019  
8 1959991000006111  
9 1960001000006118  
10 1960021000006111  
11 1960041000006116  
12 196084019  
13 1980761000006116  
14 201638010  
15 201640017  
16 2023161000006111  
17 2023171000006116  
18 2023181000006118  
19 2023191000006115  
20 207428016  
21 207611012  
22 215751000000116  
23 215761000000118  
24 215781000000110  
25 215791000000112  
26 215883014  
27 215884015  
28 215885019  
29 215889013  
30 215896010  
31 215897018  
32 215903010  
33 215917018  
34 216227011  
35 2164653019  
36 2180581000000112  
37 2181051000000117  
38 219051000000116  
39 219071000000113  
40 219081000000110  
41 219181000006119  
42 2229231000000114  
43 2229271000000111  
44 223121000000116  
45 223131000000119  
46 223181000000115  
47 226211000000111  
48 2265611000000111  
49 2265651000000110  
50 226911000000117  
51 2280211000000117  
52  
53  
54  
55  
56  
57  
58  
59  
60

For peer review only

1 2280371000000117  
2 229731000006113  
3 229901000006119  
4 2309351000000112  
5 2346191000000117  
6 2438511000000112  
7 2438551000000111  
8 2438591000000115  
9 2438631000000115  
10 2438671000000118  
11 2438711000000117  
12 2438751000000118  
13 2438791000000114  
14 2438871000000117  
15 2438911000000115  
16 2438951000000116  
17 2453201000000117  
18 2460981000000118  
19 247091000006118  
20 2475562018  
21 2475564017  
22 2475984012  
23 248261000006117  
24 248331000006118  
25 248341000006111  
26 248391000006119  
27 2492161000000114  
28 2504131000006112  
29 2504141000006119  
30 2504151000006117  
31 2504161000006115  
32 2504171000006110  
33 2504181000006113  
34 2508461000006119  
35 2512951000006110  
36 2512961000006112  
37 2512971000006117  
38 2512981000006119  
39 2513181000006113  
40 2513191000006111  
41 2514071000006111  
42 2514081000006114  
43 2514091000006112  
44 2514101000006118  
45 2514111000006115  
46 2514281000006119  
47 2514291000006116  
48 2514301000006115  
49 2519741000006118  
50 2519751000006116

For peer review only

1  
2 2519761000006119  
3 2519771000006114  
4 2519781000006112  
5 2521381000006119  
6 2522541000006111  
7 2522551000006113  
8 2522561000006110  
9 2522571000006115  
10 2522581000006117  
11 2523951000006113  
12 2529521000006112  
13 2529531000006110  
14 2530971000006110  
15 2532021000006114  
16 2532031000006112  
17 2532041000006119  
18 2532051000006117  
19 2533101000006110  
20 2533540016  
21 2533542012  
22 2533653010  
23 2534079012  
24 2534080010  
25 2534102018  
26 2534331000006115  
27 2534341000006113  
28 2534351000006110  
29 2534461000006118  
30 2534471000006113  
31 2534481000006111  
32 2542411000006113  
33 2546301000006117  
34 2546311000006119  
35 2546341000006115  
36 2546351000006118  
37 2546721000006114  
38 2546741000006119  
39 2546761000006115  
40 2548453016  
41 2548491000006118  
42 2548867016  
43 2549077010  
44 2549374014  
45 2549900011  
46 2550105015  
47 2552865010  
48 2553899015  
49 2560241000006117  
50 2566401000006115  
51 2567481000006114

For peer review only

1  
2 2571431000006111  
3 2571441000006118  
4 2571451000006116  
5 2572011000006116  
6 2572021000006112  
7 2572031000006110  
8 2572131000006111  
9 2572791000006111  
10  
11 2576875014  
12 2578161000006117  
13 2579501000006115  
14 2579511000006117  
15 2579521000006113  
16 2579531000006111  
17 2579541000006118  
18 2579551000006116  
19 2580121000006117  
20 2580131000006119  
21 2580141000006112  
22 2580151000006114  
23 258131000000113  
24 2583521000006115  
25 2588811000006118  
26 2588821000006114  
27 25891000006113  
28 2589791000006112  
29 2589801000006113  
30 2589811000006111  
31 2590251000006117  
32 2590261000006115  
33 2594581000006117  
34 2599111000006117  
35 2599121000006113  
36 2599131000006111  
37 2599151000006116  
38 2602601000006112  
39 2603511000006116  
40 2603521000006112  
41 2603531000006110  
42 2603551000006115  
43 2603561000006118  
44 2605901000006110  
45 2606061000006118  
46 260962019  
47 260992011  
48 2611781000006115  
49 2614161000000116  
50 2616201000006111  
51 2616211000006114  
52 2616221000006118

For peer review only

1  
2 2616231000006115  
3 2616241000006113  
4 261676014  
5 2619456011  
6 2629941000006115  
7 2629951000006118  
8 2629961000006116  
9 2629971000006111  
10 2629981000006114  
11 2629991000006112  
12 2630001000006111  
13 2630011000006114  
14 2630021000006118  
15 2633491000006117  
16 2633501000006113  
17 2633511000006111  
18 2633521000006115  
19 2633531000006117  
20 2633541000006110  
21 2638321000006118  
22 2643781000006112  
23 2643791000006110  
24 2643801000006111  
25 2645961000006117  
26 2648391000006117  
27 2648401000006115  
28 265193019  
29 2653191000006112  
30 2656161000006112  
31 2657681000006114  
32 2659691014  
33 2659772015  
34 2659784018  
35 2660421000006117  
36 2660431000006119  
37 2660441000006112  
38 2660451000006114  
39 2660471000006116  
40 2660481000006118  
41 2663631000006113  
42 2663641000006115  
43 2663651000006118  
44 2663661000006116  
45 2663671000006111  
46 2663721000006119  
47 2663731000006116  
48 2663741000006114  
49 2663751000006111  
50 2663761000006113  
51 2670171000006118

For peer review only

1  
2 2670181000006115  
3 2676141000006111  
4 2676151000006113  
5 2683131000006119  
6 2683161000006111  
7 2685781000006116  
8 2685791000006118  
9 2685801000006117  
10 2687831000006115  
11 2692069010  
12 2693661000006119  
13 2693681000006112  
14 2695891000006113  
15 2696141000006115  
16 2696151000006118  
17 2696161000006116  
18 2696171000006111  
19 2696641000006110  
20 2696651000006112  
21 2697401000006114  
22 2698611000006110  
23 2700801000006115  
24 2700811000006117  
25 2700821000006113  
26 2701771000006114  
27 27022019  
28 2705451000006114  
29 2705611000006110  
30 2705621000006119  
31 2705631000006116  
32 2707431000006113  
33 2707451000006118  
34 2707461000006116  
35 2710081000006118  
36 2710091000006115  
37 2710101000006114  
38 2710111000006112  
39 2710121000006116  
40 2710131000006118  
41 27148012  
42 2715221000006118  
43 2715231000006115  
44 2715241000006113  
45 2715251000006110  
46 2720021000006113  
47 2726001000006118  
48 2726011000006115  
49 2726021000006111  
50 2726711000006117  
51 2726761000006119

For peer review only

1  
2 272715013  
3 2729631000006110  
4 2731021000000110  
5 2734661000006117  
6 2734671000006112  
7 2734681000006110  
8 2734691000006113  
9 2734701000006113  
10 2734711000006111  
11 2734721000006115  
12 2737451000006113  
13 2737461000006110  
14 2737471000006115  
15 2737481000006117  
16 2737491000006119  
17 2740511000006111  
18 2741741000006112  
19 2741761000006111  
20 274480013  
21 2747671000006116  
22 2748631000006115  
23 2751951000006114  
24 2753081000006116  
25 2753271000006113  
26 2753291000006114  
27 2753301000006110  
28 2755121000006118  
29 2756681000006117  
30 2756691000006119  
31 2756701000006119  
32 2756711000006116  
33 2769471000006119  
34 2773871000006111  
35 2773881000006114  
36 2786351000006110  
37 2786361000006112  
38 2786371000006117  
39 2786381000006119  
40 2786391000006116  
41 2786401000006119  
42 2786421000006112  
43 2786431000006110  
44 2786441000006117  
45 2786451000006115  
46 2787491000006111  
47 2787501000006115  
48 2787511000006117  
49 2787521000006113  
50 278940016  
51 278946010  
52  
53  
54  
55  
56  
57  
58  
59  
60

For peer review only



1  
2 2791641000006110  
3 2791661000006114  
4 2791871000006115  
5 2793071000006111  
6 2793081000006114  
7 2794841000006114  
8 2794851000006111  
9 2796431000006114  
10 2798321000006118  
11 2798331000006115  
12 2798341000006113  
13 2798351000006110  
14 2798361000006112  
15 2799261000006110  
16 2799271000006115  
17 2799391000006113  
18 2799401000006110  
19 2799411000006113  
20 2799421000006117  
21 2799431000006119  
22 2799451000006114  
23 2802681000006112  
24 2803661000006110  
25 2806921000006116  
26 2808981000006118  
27 2808991000006115  
28 2809001000006115  
29 2809021000006113  
30 2809041000006118  
31 2809051000006116  
32 2809061000006119  
33 2813741000006119  
34 2813751000006117  
35 2813761000006115  
36 2813771000006110  
37 2813781000006113  
38 2813791000006111  
39 2813801000006112  
40 2816091000006115  
41 2823531000006112  
42 2823541000006119  
43 2823551000006117  
44 2823561000006115  
45 2823571000006110  
46 2823581000006113  
47 2823591000006111  
48 2823601000006115  
49 2823611000006117  
50 2823621000006113  
51 2823631000006111

For peer review only

1  
2 2823881000006111  
3 2823891000006114  
4 2823901000006113  
5 2823911000006111  
6 2825221000006110  
7 2825231000006113  
8 282787016  
9 2828781000006114  
10 2830421000006118  
11 2831281000006114  
12 2833391000006117  
13 2833401000006115  
14 2833411000006117  
15 2833421000006113  
16 2833431000006111  
17 2839071000006118  
18 2839081000006115  
19 2839091000006117  
20 2839101000006111  
21 2839111000006114  
22 2843421000006112  
23 2845381000006118  
24 2845391000006115  
25 2845401000006118  
26 2845411000006115  
27 2845441000006116  
28 2845451000006119  
29 2845461000006117  
30 2847981000006112  
31 2848541000006110  
32 2848551000006112  
33 2849391000006118  
34 2861541000006110  
35 2861551000006112  
36 2868371000006118  
37 2868381000006115  
38 287014015  
39 287020019  
40 287021015  
41 287031010  
42 2870981000006110  
43 287191010  
44 2872268016  
45 287384018  
46 2874101000006110  
47 2880201000006116  
48 2880231000006112  
49 288185010  
50 288186011  
51 288350019

For peer review only

1  
2 288351015  
3 288354011  
4 288355012  
5 288362015  
6 288363013  
7 288364019  
8 288372017  
9 288377011  
10 288380012  
11 288382016  
12 288387010  
13 288388017  
14 288390016  
15 288391017  
16 288393019  
17 288403012  
18 288404018  
19 288406016  
20 288407013  
21 288408015  
22 288409011  
23 288410018  
24 288411019  
25 288412014  
26 288414010  
27 288417015  
28 288418013  
29 288419017  
30 288423013  
31 288427014  
32 288429012  
33 288430019  
34 288433017  
35 288434011  
36 288435012  
37 288437016  
38 288438014  
39 288439018  
40 288440016  
41 288443019  
42 288444013  
43 288448011  
44 288449015  
45 288450015  
46 288453018  
47 288454012  
48 288459019  
49 288460012  
50 288465019  
51 288468017

For peer review only

1  
2 288469013  
3 288470014  
4 288471013  
5 288472018  
6 288473011  
7 288474017  
8 288478019  
9 288485015  
10 288486019  
11 288505015  
12 288506019  
13 288507011  
14 288508018  
15 288509014  
16 288510016  
17 288515014  
18 288516010  
19 288517018  
20 288518011  
21 288522018  
22 288529010  
23 288532013  
24 288533015  
25 288541015  
26 288546013  
27 288548014  
28 288550018  
29 288552014  
30 288554010  
31 288556012  
32 288561014  
33 288563012  
34 288564018  
35 288568015  
36 288570012  
37 288571011  
38 288573014  
39 288578017  
40 288582015  
41 288589012  
42 288594012  
43 288597017  
44 288602012  
45 288607018  
46 288608011  
47 288614016  
48 288625013  
49 288628010  
50 288631011  
51 288632016

For peer review only

1  
2 288633014  
3 288635019  
4 288638017  
5 288639013  
6 288641014  
7 288644018  
8 288647013  
9 288649011  
10 288650011  
11 288652015  
12 288653013  
13 288654019  
14 288655018  
15 288656017  
16 288659012  
17 288663017  
18 288670017  
19 288671018  
20 288675010  
21 288685011  
22 288688013  
23 288690014  
24 288692018  
25 288694017  
26 288697012  
27 288698019  
28 288699010  
29 288700011  
30 288702015  
31 288707014  
32 288711015  
33 288712010  
34 288717016  
35 288720012  
36 288723014  
37 288731016  
38 288734012  
39 288735013  
40 288736014  
41 288739019  
42 288741018  
43 288742013  
44 288744014  
45 288747019  
46 288748012  
47 288749016  
48 288751017  
49 288754013  
50 288756010  
51 288757018

For peer review only

1  
2 288759015  
3 288760013  
4 288761012  
5 288762017  
6 288763010  
7 288764016  
8 288766019  
9 288771014  
10 288772019  
11 288775017  
12 288776016  
13 288779011  
14 288784017  
15 288787012  
16 288790018  
17 288792014  
18 288794010  
19 288797015  
20 288799017  
21 288800018  
22 288801019  
23 288802014  
24 288803016  
25 288806012  
26 288807015  
27 288808013  
28 288809017  
29 288810010  
30 288811014  
31 288813012  
32 288815017  
33 288819011  
34 288820017  
35 288821018  
36 288822013  
37 288823015  
38 288824014  
39 288825010  
40 288826011  
41 288827019  
42 288828012  
43 288829016  
44 288832018  
45 288839010  
46 288840012  
47 288841011  
48 288847010  
49 288852017  
50 288857011  
51 288858018

For peer review only

1  
2 288869015  
3 288872010  
4 288875012  
5 288883018  
6 288885013  
7 288886014  
8 288887017  
9 288888010  
10 288889019  
11 288894019  
12 288896017  
13 288897014  
14 288898016  
15 288901015  
16 288909018  
17 288910011  
18 288911010  
19 288912015  
20 288913013  
21 288914019  
22 288915018  
23 288916017  
24 288917014  
25 288918016  
26 288919012  
27 288920018  
28 288921019  
29 288922014  
30 288923016  
31 288924010  
32 288928013  
33 288929017  
34 288930010  
35 288931014  
36 288935017  
37 288941012  
38 288942017  
39 288943010  
40 288944016  
41 288946019  
42 288947011  
43 288948018  
44 288949014  
45 288950014  
46 288951013  
47 288952018  
48 288953011  
49 288959010  
50 288960017  
51 288962013  
52  
53  
54  
55  
56  
57  
58  
59  
60

For peer review only

1  
2 288963015  
3 288964014  
4 288967019  
5 288968012  
6 288969016  
7 288970015  
8 288971016  
9 288972011  
10 288975013  
11 288979019  
12 288980016  
13 288985014  
14 288986010  
15 288991011  
16 288995019  
17 288999013  
18 289001014  
19 289007013  
20 289008015  
21 289009011  
22 289011019  
23 289012014  
24 289013016  
25 289014010  
26 289015011  
27 289017015  
28 289019017  
29 289021010  
30 289022015  
31 289023013  
32 289024019  
33 289025018  
34 289026017  
35 289027014  
36 289028016  
37 289029012  
38 289030019  
39 289031015  
40 289033017  
41 289034011  
42 289037016  
43 289039018  
44 289040016  
45 289041017  
46 289042012  
47 289043019  
48 289044013  
49 289045014  
50 289046010  
51 289047018

For peer review only



1  
2 289048011  
3 289049015  
4 289050015  
5 289051016  
6 289052011  
7 289053018  
8 289054012  
9 289055013  
10 289056014  
11 289057017  
12 2890591000006113  
13 289060012  
14 2890601000006117  
15 289063014  
16 289066018  
17 289079010  
18 289080013  
19 289084016  
20 289088018  
21 289089014  
22 289091018  
23 289092013  
24 289094014  
25 289095010  
26 289096011  
27 289097019  
28 289099016  
29 2891011000006116  
30 2891021000006112  
31 2891031000006110  
32 2891041000006117  
33 289107010  
34 289108017  
35 289110015  
36 289111016  
37 289114012  
38 289115013  
39 289116014  
40 289121012  
41 289122017  
42 289124016  
43 289127011  
44 289128018  
45 289131017  
46 289132012  
47 289137018  
48 289140018  
49 289141019  
50 289142014  
51 289143016

For peer review only

1  
2 289144010  
3 289145011  
4 289146012  
5 289147015  
6 289148013  
7 289149017  
8 289150017  
9 289151018  
10 289153015  
11 289156011  
12 289157019  
13 289158012  
14 289159016  
15 289166015  
16 289171010  
17 289172015  
18 289173013  
19 289175018  
20 289178016  
21 289179012  
22 289180010  
23 289181014  
24 289182019  
25 289184018  
26 289187013  
27 289188015  
28 289189011  
29 289190019  
30 289191015  
31 289192010  
32 289193017  
33 289194011  
34 289195012  
35 289196013  
36 289197016  
37 289198014  
38 289199018  
39 289202011  
40 289203018  
41 289204012  
42 289206014  
43 289207017  
44 289208010  
45 289209019  
46 289210012  
47 289217010  
48 289219013  
49 289223017  
50 289224011  
51 289234019

For peer review only

1  
2 289242018  
3 289246015  
4 289249010  
5 289251014  
6 289252019  
7 289257013  
8 289259011  
9 289260018  
10 289262014  
11 289267015  
12 289270016  
13 289271017  
14 289272012  
15 289275014  
16 2892751000006112  
17 289276010  
18 289279015  
19 289280017  
20 289281018  
21 289285010  
22 289288012  
23 289294016  
24 289296019  
25 289297011  
26 289298018  
27 289299014  
28 289301019  
29 289308013  
30 289311014  
31 289314018  
32 289315017  
33 289316016  
34 289317013  
35 289318015  
36 289319011  
37 289322013  
38 289325010  
39 289326011  
40 289327019  
41 289329016  
42 289330014  
43 289337012  
44 289338019  
45 289339010  
46 289341011  
47 289343014  
48 289345019  
49 289346018  
50 289347010  
51 289348017

For peer review only

1  
2 289349013  
3 289352017  
4 2893521000006118  
5 289353010  
6 2893531000006115  
7  
8 289354016  
9 289355015  
10 289356019  
11 289357011  
12  
13 289358018  
14 289360016  
15 289361017  
16 289362012  
17 289364013  
18  
19 289365014  
20 289369015  
21 289374011  
22 289375012  
23 289376013  
24  
25 289378014  
26 289379018  
27 289380015  
28 289381016  
29 289382011  
30 289383018  
31 289388010  
32 289389019  
33 289390011  
34 289396017  
35 289397014  
36 289406011  
37 289409016  
38 289413011  
39 289419010  
40 289421017  
41 289423019  
42 289424013  
43 289425014  
44 289426010  
45 289427018  
46 289428011  
47 289429015  
48 289430013  
49 289431012  
50 289432017  
51 289435015  
52 289436019  
53 289437011  
54 289438018  
55 289441010  
56  
57  
58  
59  
60

For peer review only

1  
2 289442015  
3 289445018  
4 289446017  
5 289447014  
6 289448016  
7 289449012  
8 289449012  
9 289450012  
10 289451011  
11 289452016  
12 289515018  
13 289530010  
14 289535017  
15 289536016  
16 289538015  
17 289542017  
18 289543010  
19 289545015  
20 289546019  
21 289549014  
22 289550014  
23 289553011  
24 289554017  
25 289557012  
26 289559010  
27 289561018  
28 289565010  
29 289566011  
30 289571016  
31 289574012  
32 2896281000006114  
33 2896301000006113  
34 2896331000006117  
35 289781019  
36 289783016  
37 289784010  
38 289785011  
39 289786012  
40 289787015  
41 289789017  
42 289790014  
43 289791013  
44 289793011  
45 289904016  
46 2900601000006112  
47 2900611000006110  
48 2900621000006119  
49 2900631000006116  
50 2900641000006114  
51 2900651000006111  
52 2900661000006113

For peer review only

1  
2 2902211000006111  
3 2902221000006115  
4 2902231000006117  
5 2902531000006119  
6 2902541000006112  
7 2902551000006114  
8 2905761000006112  
9 2905771000006117  
10 2905781000006119  
11 2905791000006116  
12 2905801000006115  
13  
14 290718013  
15 290732010  
16 290741017  
17 290749015  
18 290750015  
19 290751016  
20 290752011  
21 290753018  
22 290758010  
23 290768017  
24 290772018  
25 290773011  
26 290775016  
27 290776015  
28 290777012  
29 290778019  
30 290780013  
31 290782017  
32 290783010  
33 290784016  
34 290787011  
35 290788018  
36 290789014  
37 290791018  
38 290792013  
39 290793015  
40 290794014  
41 290804014  
42 290806011  
43 290808012  
44 290818019  
45 290819010  
46 290821017  
47 290822012  
48 290824013  
49 290825014  
50 290827018  
51 290830013  
52 290835015

For peer review only

1  
2 290836019  
3 290838018  
4 290839014  
5 290841010  
6 290843013  
7 290849012  
8 290851011  
9 290856018  
10 290865013  
11 290866014  
12 290867017  
13 290868010  
14 290889018  
15 290893012  
16 290894018  
17 290895017  
18 290896016  
19 290900018  
20 290901019  
21 291288013  
22 291289017  
23 291290014  
24 291293011  
25 291294017  
26 291295016  
27 291296015  
28 291297012  
29 291299010  
30 291300019  
31 291301015  
32 291302010  
33 291304011  
34 291306013  
35 291307016  
36 291320018  
37 291322014  
38 291326012  
39 291327015  
40 291328013  
41 291329017  
42 291330010  
43 291331014  
44 291332019  
45 291337013  
46 291343010  
47 291344016  
48 291347011  
49 291348018  
50 291356015  
51 291358019  
52  
53  
54  
55  
56  
57  
58  
59  
60

For peer review only

1  
2 291359010  
3 291360017  
4 291361018  
5 291362013  
6 291363015  
7 291364014  
8 291369016  
9 291372011  
10 291374012  
11 291375013  
12 291377017  
13 291378010  
14 291379019  
15 291380016  
16 291381017  
17 291383019  
18 291391011  
19 291395019  
20 291396018  
21 291398017  
22 291402014  
23 291403016  
24 2914071000006116  
25 291408013  
26 2914081000006118  
27 2914091000006115  
28 2914101000006114  
29 291411014  
30 291414018  
31 291418015  
32 291419011  
33 291425010  
34 291426011  
35 291427019  
36 291428012  
37 291429016  
38 291431013  
39 291433011  
40 291434017  
41 291435016  
42 291436015  
43 2914361000006113  
44 291437012  
45 291438019  
46 291439010  
47 291440012  
48 291441011  
49 291442016  
50 291443014  
51 291444015  
52  
53  
54  
55  
56  
57  
58  
59  
60

For peer review only



1  
2 291445019  
3 291446018  
4 291447010  
5 291448017  
6 291449013  
7 291450013  
8 291451012  
9 291452017  
10 291454016  
11 291461017  
12 291462012  
13 291464013  
14 291465014  
15 291470019  
16 291472010  
17 291474011  
18 291475012  
19 291476013  
20 291479018  
21 291480015  
22 291481016  
23 291482011  
24 291483018  
25 291484012  
26 291485013  
27 291486014  
28 291489019  
29 291490011  
30 291491010  
31 291492015  
32 291493013  
33 291495018  
34 291496017  
35 291508010  
36 291510012  
37 291515019  
38 291524011  
39 291525012  
40 291526013  
41 291528014  
42 291529018  
43 291530011  
44 291536017  
45 291538016  
46 291539012  
47 291540014  
48 291543011  
49 291544017  
50 291545016  
51 291547012  
52  
53  
54  
55  
56  
57  
58  
59  
60

For peer review only

1  
2 291548019  
3 291549010  
4 291551014  
5 291553012  
6 2915531000006111  
7  
8 291558015  
9 291559011  
10 291560018  
11 291563016  
12 291566012  
13 291571017  
14 291572012  
15 291574013  
16 291578011  
17 291579015  
18 291581018  
19 291587019  
20 291588012  
21 291604015  
22 291607010  
23 291617017  
24 291618010  
25 291622017  
26 291623010  
27 291624016  
28 291626019  
29 2916281000006118  
30 2916291000006115  
31 291630016  
32 291631017  
33 291635014  
34 291638011  
35 291641019  
36 291649017  
37 291650017  
38 291652013  
39 291653015  
40 291658012  
41 291659016  
42 291660014  
43 291661013  
44 291662018  
45 291663011  
46 291667012  
47 291668019  
48 291669010  
49 291671010  
50 291673013  
51 291674019  
52 291675018

For peer review only

1  
2 291676017  
3 291684018  
4 291685017  
5 291687013  
6 291688015  
7 291695012  
8 291698014  
9 291699018  
10 291700017  
11 291701018  
12 291702013  
13 291711013  
14 291712018  
15 291713011  
16 291714017  
17 291715016  
18 291718019  
19 291719010  
20 291721017  
21 291728011  
22 291730013  
23 291733010  
24 291734016  
25 291737011  
26 291739014  
27 291742015  
28 291748016  
29 291752016  
30 291765013  
31 291766014  
32 291778013  
33 291779017  
34 291780019  
35 291782010  
36 291783017  
37 291786013  
38 291787016  
39 291790010  
40 291791014  
41 291794018  
42 291795017  
43 291801014  
44 291808015  
45 291811019  
46 291815011  
47 291825018  
48 291828016  
49 2918291000006119  
50 291835012  
51 291836013  
52  
53  
54  
55  
56  
57  
58  
59  
60

For peer review only

1  
2 291837016  
3 291843019  
4 291844013  
5 291846010  
6 291852011  
7 291853018  
8 291854012  
9 291855013  
10 291861011  
11 291864015  
12 291867010  
13 291880013  
14 291881012  
15 291886019  
16 2919531000006114  
17 2919541000006116  
18 291957016  
19 291964019  
20 291976019  
21 291977011  
22 292086018  
23 292094013  
24 292095014  
25 292096010  
26 292097018  
27 292099015  
28 292100011  
29 292101010  
30 292102015  
31 292105018  
32 292110019  
33 292111015  
34 292116013  
35 292118014  
36 292120012  
37 292121011  
38 292126018  
39 292127010  
40 292128017  
41 292132011  
42 292135013  
43 292136014  
44 292137017  
45 292138010  
46 292139019  
47 292142013  
48 292143015  
49 292146011  
50 292147019  
51 292148012

For peer review only

1  
2 292152012  
3 292154013  
4 292156010  
5 292158011  
6 292165015  
7 292166019  
8 292197015  
9 292199017  
10 292200019  
11 292201015  
12 292202010  
13 292203017  
14 292204011  
15 292206013  
16 292207016  
17 292208014  
18 292212015  
19 292213013  
20 292214019  
21 2922171000006119  
22 292275013  
23 292747012  
24 2928221000006110  
25 2930481000006112  
26 2930491000006110  
27 2930501000006119  
28 2930511000006116  
29 2930521000006112  
30 2930531000006110  
31 2930541000006117  
32 2930561000006118  
33 293369012  
34 2933691000006118  
35 2933701000006118  
36 2933711000006115  
37 2933721000006111  
38 2933731000006114  
39 2933741000006116  
40 293376019  
41 2933951000006116  
42 2933961000006119  
43 2933971000006114  
44 2934011000006115  
45 2934021000006111  
46 2947001000006110  
47 2950221000006113  
48 2952051000006114  
49 2952061000006111  
50 2952071000006116  
51 2952081000006118

For peer review only

1  
2 2953231000006118  
3 2954341000006118  
4 2954351000006116  
5 2954751000006115  
6 2954761000006118  
7  
8 2955231000006119  
9 2958641000006118  
10 2960301000006117  
11 2960311000006119  
12 2960321000006110  
13 2960331000006113  
14 2960341000006115  
15 2960351000006118  
16 2964691000006114  
17 2964701000006114  
18 2964711000006112  
19 2964731000006118  
20 2964741000006111  
21 2964751000006113  
22 2965671000006114  
23 297015017  
24 297117011  
25 297149011  
26 2971579012  
27 2972241000006117  
28 2972251000006115  
29 2972261000006118  
30 2972271000006113  
31 2972281000006111  
32 2972301000006110  
33 297441018  
34 297463010  
35 297583014  
36 297584015  
37 297592012  
38 297670018  
39 297901016  
40 2979601000006113  
41 2979611000006111  
42 2985501000006118  
43 2985511000006115  
44 298757016  
45 298762015  
46 298769012  
47 2987751000006115  
48 2987761000006118  
49 2989331000006118  
50 2989341000006111  
51 2989361000006110  
52 299173011

For peer review only

1  
2 2991911000006111  
3 2991921000006115  
4 2991931000006117  
5 2992261000006111  
6 2992271000006116  
7 2992281000006118  
8 2992291000006115  
9 2992301000006119  
10 2992311000006116  
11 2992321000006112  
12 2992331000006110  
13 299306010  
14 2993821000006111  
15 299401016  
16 2994171000006119  
17 2994181000006116  
18 2994191000006118  
19 2994201000006115  
20 2994211000006117  
21 2994221000006113  
22 2994811000006118  
23 2994821000006114  
24 2994831000006112  
25 2995091000006115  
26 2995101000006114  
27 299581000000117  
28 2998491000006119  
29 2998501000006110  
30 3001921000006115  
31 3001931000006117  
32 3004471000006113  
33 3004481000006111  
34 3004491000006114  
35 3004501000006118  
36 3004511000006115  
37 3004521000006111  
38 3004531000006114  
39 3004541000006116  
40 3005991000006116  
41 3006001000006115  
42 3006011000006117  
43 3006031000006111  
44 3006041000006118  
45 3007021000006111  
46 3010051000006116  
47 3010061000006119  
48 3010071000006114  
49 3010081000006112  
50 3010091000006110  
51 3010101000006116

For peer review only

1  
2 3010111000006118  
3 3010121000006114  
4 301081000000115  
5 3012081000006111  
6 3015941000006111  
7 3015951000006113  
8 3015961000006110  
9 3015971000006115  
10 3016451000006112  
11 3016461000006114  
12 3019621000006112  
13 3019631000006110  
14 3019641000006117  
15 3022391000006118  
16 3022721000006116  
17 3022731000006118  
18 3022741000006111  
19 3023731000006114  
20 3023741000006116  
21 3023751000006119  
22 3023761000006117  
23 3028701000006111  
24 3028711000006114  
25 3029921000006111  
26 3030841000006117  
27 3030851000006115  
28 3033861000006112  
29 3033871000006117  
30 3033881000006119  
31 3033891000006116  
32 3033901000006117  
33 3033911000006119  
34 304036011  
35 304071000006110  
36 3042031000006118  
37 3042041000006111  
38 304211000006113  
39 304221000006117  
40 304251000006114  
41 304259014  
42 304271000006116  
43 304461000006112  
44 304471000006117  
45 304481000006119  
46 304491000006116  
47 304501000006112  
48 304521000006119  
49 304531000006116  
50 304551000006111  
51 304621000006115

For peer review only



1  
2 304631000006117  
3 304641000006110  
4 304651000006112  
5 304661000006114  
6 304681000006116  
7 304701000006118  
8 304711000006115  
9 304731000006114  
10 304771000006112  
11 304781000006110  
12 304791000006113  
13 304901000006115  
14 304921000006113  
15 3049381000006112  
16 304941000006118  
17 305011000006117  
18 305021000006113  
19 305041000006118  
20 305051000006116  
21 305081000006112  
22 305101000006116  
23 305111000006118  
24 305171000006110  
25 305181000006113  
26 305201000006114  
27 305211000006112  
28 305231000006118  
29 305261000006110  
30 305268019  
31 305269010  
32 305271000006115  
33 305291000006119  
34 305301000006118  
35 3053291000006116  
36 3053301000006115  
37 305331000006114  
38 3053331000006111  
39 305351000006119  
40 305371000006112  
41 305531000006115  
42 305551000006110  
43 305571000006117  
44 305621000006119  
45 305631000006116  
46 305651000006111  
47 305671000006118  
48 305681000006115  
49 305701000006117  
50 305711000006119  
51 305721000006110

For peer review only

1  
2 305731000006113  
3 305741000006115  
4 305791000006112  
5 305801000006113  
6 305831000006117  
7 305841000006110  
8 305861000006114  
9 305901000006119  
10 305921000006112  
11 305941000006117  
12 305951000006115  
13 305971000006113  
14 306081000006118  
15 306091000006115  
16 306111000006112  
17 306131000006118  
18 306151000006113  
19 306161000006110  
20 306211000006118  
21 306221000006114  
22 306261000006115  
23 306361000006113  
24 306381000006115  
25 306401000006115  
26 306451000006116  
27 306571000006113  
28 306641000006116  
29 306651000006119  
30 306661000006117  
31 306681000006110  
32 306691000006113  
33 306721000006115  
34 306751000006112  
35 306771000006119  
36 3067781000006111  
37 3067791000006114  
38 3067801000006110  
39 3067811000006113  
40 3067821000006117  
41 306821000006110  
42 3068321000006114  
43 306861000006116  
44 306871000006111  
45 3068711000006117  
46 306881000006114  
47 306901000006111  
48 306941000006113  
49 307001000006112  
50 307051000006111  
51 307071000006118

For peer review only

1  
2 307081000006115  
3 307091000006117  
4 307131000006115  
5 307191000006116  
6 307251000006119  
7 307271000006112  
8 307281000006110  
9 307291000006113  
10 307301000006114  
11 307321000006116  
12 3073391000006113  
13 3073401000006110  
14 3073411000006113  
15 3073421000006117  
16 307441000006115  
17 3075101000006117  
18 3075111000006119  
19 3075121000006110  
20 3075131000006113  
21 3075141000006115  
22 3075151000006118  
23 3075161000006116  
24 3075171000006111  
25 307521000006114  
26 307531000006112  
27 307541000006119  
28 307551000006117  
29 307561000006115  
30 307571000006110  
31 307601000006115  
32 307611000006117  
33 307631000006111  
34 307671000006114  
35 307711000006113  
36 3077541000006115  
37 3077551000006118  
38 3077561000006116  
39 3077571000006111  
40 3077581000006114  
41 307801000006119  
42 307811000006116  
43 307821000006112  
44 307831000006110  
45 307841000006117  
46 3078421000006110  
47 307861000006118  
48 307891000006114  
49 307911000006111  
50 307921000006115  
51 307951000006112

For peer review only

1  
2 307971000006119  
3 308001000006111  
4 308031000006115  
5 308071000006117  
6 308091000006116  
7 308101000006110  
8 3081091000006118  
9 3081101000006112  
10 308111000006113  
11 3081111000006110  
12 3081121000006119  
13 308121000006117  
14 308181000006118  
15 308191000006115  
16 308201000006117  
17 308241000006115  
18 308261000006116  
19 308271000006111  
20 308291000006112  
21 308351000006112  
22 308361000006114  
23 308371000006119  
24 308381000006116  
25 308411000006118  
26 308461000006115  
27 308491000006111  
28 308501000006115  
29 3085201000006117  
30 3085211000006119  
31 308551000006116  
32 308641000006117  
33 308671000006113  
34 308701000006114  
35 308731000006118  
36 308761000006110  
37 308771000006115  
38 308811000006115  
39 308821000006111  
40 308841000006116  
41 308851000006119  
42 308861000006117  
43 308871000006112  
44 308941000006114  
45 308951000006111  
46 308961000006113  
47 308971000006118  
48 309041000006115  
49 309061000006116  
50 309071000006111  
51 309081000006114

For peer review only

1  
2 309091000006112  
3 309131000006114  
4 309211000006114  
5 309231000006115  
6 309251000006110  
7 309261000006112  
8 309281000006119  
9 309301000006115  
10 309311000006117  
11 309321000006113  
12 309351000006116  
13 309361000006119  
14 309381000006112  
15 309401000006112  
16 309431000006116  
17 309441000006114  
18 309451000006111  
19 309461000006113  
20 309471000006118  
21 309501000006113  
22 309511000006111  
23 309551000006112  
24 309561000006114  
25 309571000006119  
26 309581000006116  
27 309601000006114  
28 309641000006111  
29 309671000006115  
30 309701000006119  
31 309731000006110  
32 309741000006117  
33 309811000006113  
34 3098181000006114  
35 309851000006114  
36 309871000006116  
37 309891000006115  
38 3099301000006112  
39 3099311000006110  
40 3099321000006119  
41 309971000006110  
42 3101101000006116  
43 3101111000006118  
44 3101121000006114  
45 310161000006110  
46 3102251000006118  
47 3102261000006116  
48 3102271000006111  
49 310231000006112  
50 310241000006119  
51 310261000006115

For peer review only

1  
2 310271000006110  
3 310281000006113  
4 310311000006110  
5 310321000006119  
6 310341000006114  
7 310361000006113  
8 310371000006118  
9 310391000006117  
10 310411000006117  
11 310451000006116  
12 310491000006110  
13 310521000006112  
14 310531000006110  
15 310541000006117  
16 310571000006113  
17 310581000006111  
18 310601000006118  
19 310621000006111  
20 310661000006117  
21 310681000006110  
22 3107111000006111  
23 3107121000006115  
24 310731000006117  
25 310741000006110  
26 310791000006118  
27 310801000006117  
28 310861000006116  
29 310871000006111  
30 310891000006112  
31 310951000006110  
32 310959019  
33 310960012  
34 310961000006112  
35 310962016  
36 310963014  
37 310965019  
38 310969013  
39 310971000006117  
40 310971013  
41 310973011  
42 310975016  
43 310976015  
44 311061000006119  
45 311091000006110  
46 311111000006118  
47 3111611000006112  
48 3111891000006115  
49 311191000006111  
50 311211000006112  
51 311221000006116

For peer review only

1 311271000006115  
2 311291000006119  
3 311301000006118  
4 311361000006117  
5 311391000006113  
6 311551000006110  
7 311561000006112  
8 311571000006117  
9 311581000006119  
10 311591000006116  
11 311651000006111  
12 311951000006115  
13 311971000006113  
14 311978010  
15 311979019  
16 311980016  
17 311981000006111  
18 311981017  
19 311982012  
20 311983019  
21 311984013  
22 311986010  
23 311987018  
24 311988011  
25 311989015  
26 311994015  
27 311995019  
28 311996018  
29 311997010  
30 311998017  
31 311999013  
32 312000019  
33 312001015  
34 312004011  
35 312005012  
36 312006013  
37 312008014  
38 312021000006118  
39 312031000006115  
40 312041000006113  
41 312051000006110  
42 312061000006112  
43 3120681000006117  
44 312071000006117  
45 312081000006119  
46 312101000006110  
47 312121000006117  
48 312141000006112  
49 312161000006111  
50 312161016

For peer review only

1  
2 312190010  
3 312201000006117  
4 312241000006115  
5 312251000006118  
6 312281000006114  
7 312291000006112  
8 312301000006113  
9 3123071000006117  
10 3123081000006119  
11 3123091000006116  
12 3123101000006110  
13 312311000006111  
14 3123111000006113  
15 3123121000006117  
16 3123141000006112  
17 3123151000006114  
18 312321000006115  
19 312331000006117  
20 312361000006114  
21 312391000006118  
22 312421000006114  
23 312441000006119  
24 312461000006115  
25 312491000006111  
26 312531000006111  
27 312541000006118  
28 312591000006110  
29 312601000006119  
30 312621000006112  
31 312631000006110  
32 3126931000006110  
33 312731000006118  
34 312741000006111  
35 312761000006110  
36 3127731000006111  
37 312781000006117  
38 3127821000006118  
39 3127831000006115  
40 312801000006118  
41 312841000006116  
42 312851000006119  
43 3128681000006119  
44 312871000006112  
45 312881000006110  
46 312911000006110  
47 312931000006116  
48 312951000006111  
49 313011000006118  
50 313021000006114  
51 313031000006112

For peer review only



1  
2 313041000006119  
3 313051000006117  
4 313111000006119  
5 313131000006113  
6 313161000006116  
7 313171000006111  
8 313191000006112  
9 3131931000006115  
10 313201000006110  
11 313211000006113  
12 313221000006117  
13 313241000006112  
14 313251000006114  
15 313261000006111  
16 3132791000006111  
17 313421000006118  
18 313441000006113  
19 3135001000006113  
20 313501000006112  
21 313521000006119  
22 313541000006114  
23 313561000006113  
24 313601000006113  
25 3136271000006118  
26 3136281000006115  
27 313651000006112  
28 3136631000006119  
29 3136641000006112  
30 313691000006118  
31 313701000006118  
32 313711000006115  
33 313751000006119  
34 313761000006117  
35 313791000006113  
36 313801000006114  
37 313831000006118  
38 313851000006113  
39 313868017  
40 313874017  
41 313931000006111  
42 3139811000006115  
43 3139821000006111  
44 3139831000006114  
45 3139841000006116  
46 3139851000006119  
47 3139861000006117  
48 3139871000006112  
49 3139881000006110  
50 3139891000006113  
51 314001000006118

For peer review only

1  
2 314021000006111  
3 314051000006119  
4 314071000006112  
5 314081000006110  
6 314091000006113  
7  
8 314111000006116  
9 314121000006112  
10 314141000006117  
11 314171000006113  
12  
13 3142001000006118  
14 314201000006112  
15 3142011000006115  
16 3142071000006112  
17 314211000006110  
18  
19 314231000006116  
20 314241000006114  
21 314251000006111  
22 314261000006113  
23 314281000006115  
24  
25 314311000006118  
26 314321000006114  
27 314351000006117  
28 3143851000006116  
29 3143861000006119  
30 3143871000006114  
31  
32 314401000006113  
33 314411000006111  
34 314421000006115  
35 314441000006110  
36 314451000006112  
37  
38 314501000006114  
39 314551000006113  
40 314581000006117  
41 314621000006117  
42 314661000006111  
43 314671000006116  
44 314691000006115  
45 314701000006115  
46 314711000006117  
47  
48 3147481000006118  
49 3147491000006115  
50 314791000006110  
51 314811000006114  
52 314851000006110  
53 314881000006119  
54 314891000006116  
55 314911000006119  
56 314921000006110  
57 314971000006111  
58 314991000006112  
59  
60

For peer review only

1  
2 315011000006119  
3 315031000006113  
4 315071000006111  
5 315101000006118  
6 315131000006114  
7 315161000006117  
8 315211000006114  
9 315221000006118  
10 315231000006115  
11 315251000006110  
12 315261000006112  
13 315291000006116  
14 315301000006115  
15 315321000006113  
16 315331000006111  
17 315341000006118  
18 315491000006117  
19 315501000006113  
20 315511000006111  
21 315531000006117  
22 315541000006110  
23 315581000006116  
24 315611000006112  
25 315621000006116  
26 315631000006118  
27 3156401000006114  
28 3156421000006116  
29 3156431000006118  
30 315651000006113  
31 315681000006117  
32 315721000006112  
33 315741000006117  
34 315751000006115  
35 315771000006113  
36 315781000006111  
37 315861000006111  
38 315871000006116  
39 315881000006118  
40 3159241000006116  
41 3159251000006119  
42 316001000006112  
43 316011000006110  
44 316031000006116  
45 316041000006114  
46 316111000006114  
47 316121000006118  
48 316131000006115  
49 316141000006113  
50 316181000006119  
51 316201000006118

For peer review only

1  
2 316211000006115  
3 316221000006111  
4 316291000006113  
5 316301000006114  
6 316311000006112  
7 316331000006118  
8 316351000006113  
9 316381000006117  
10 316401000006117  
11 316431000006113  
12 316441000006115  
13 316451000006118  
14 316461000006116  
15 316471000006111  
16 316491000006112  
17 316511000006118  
18 316531000006112  
19 316591000006111  
20 316611000006117  
21 316631000006111  
22 316691000006110  
23 316701000006110  
24 316741000006112  
25 316761000006111  
26 316791000006115  
27 316801000006119  
28 316821000006112  
29 316831000006110  
30 316851000006115  
31 316871000006113  
32 316881000006111  
33 316891000006114  
34 316931000006117  
35 316951000006112  
36 316961000006114  
37 3169661000006113  
38 316971000006119  
39 31698014  
40 317001000006114  
41 317021000006116  
42 317041000006111  
43 317051000006113  
44 3170631000006119  
45 3170641000006112  
46 3170651000006114  
47 3170661000006111  
48 3170671000006116  
49 317131000006117  
50 317141000006110  
51 317161000006114

For peer review only

1  
2 317191000006118  
3 317201000006115  
4 317261000006119  
5 317271000006114  
6 317341000006113  
7 317351000006110  
8 317361000006112  
9 317411000006116  
10 317421000006112  
11 317431000006110  
12 317441000006117  
13 317451000006115  
14 317501000006118  
15 3175581000006112  
16 317581000006110  
17 317611000006119  
18 317651000006118  
19 317671000006111  
20 317691000006112  
21 317721000006119  
22 317731000006116  
23 317821000006114  
24 317871000006110  
25 317901000006110  
26 317921000006117  
27 317931000006119  
28 317941000006112  
29 317951000006114  
30 317961000006111  
31 317991000006115  
32 318001000006113  
33 318011000006111  
34 3180111000006111  
35 3180121000006115  
36 3180131000006117  
37 3180141000006110  
38 318051000006112  
39 318081000006116  
40 318101000006112  
41 318141000006114  
42 318181000006115  
43 318191000006117  
44 318211000006116  
45 318231000006110  
46 318241000006117  
47 318261000006118  
48 3183401000006110  
49 3183601000006112  
50 3186671000006113  
51 3188651000006116

For peer review only

1  
2 3188671000006114  
3 3188681000006112  
4 3188691000006110  
5 3188701000006110  
6 318991000006119  
7  
8 319001000006119  
9 3195401000006110  
10 3195411000006113  
11 3197611000006117  
12 3197621000006113  
13 3198781000006117  
14 3198791000006119  
15 3198801000006118  
16 3198811000006115  
17 3198821000006111  
18 3198831000006114  
19 3211111000006118  
20 3211151000006117  
21 3211851000006112  
22 3216591000006111  
23 3216601000006115  
24 3216611000006117  
25 3217331000006115  
26 3217341000006113  
27 3217361000006112  
28 3217421000006112  
29 3217431000006110  
30 321861000006116  
31 321871000006111  
32 3219021000006112  
33 3221981000006119  
34 3221991000006116  
35 3222001000006119  
36 3222011000006116  
37 3222041000006117  
38 3222051000006115  
39 322511000006113  
40 322521000006117  
41 3226021000006111  
42 3226031000006114  
43 3226041000006116  
44 3226051000006119  
45 3226061000006117  
46 3226071000006112  
47 3226401000006113  
48 3226411000006111  
49 3227231000006119  
50 3227241000006112  
51 3227251000006114  
52 3228851000006114

For peer review only

1 3228861000006111  
2 3228871000006116  
3 3232761000006118  
4 3232771000006113  
5 3232781000006111  
6 3234021000006117  
7 3234031000006119  
8 3234041000006112  
9 3234051000006114  
10 3234061000006111  
11 3234071000006116  
12 3234081000006118  
13 3234091000006115  
14 3234101000006114  
15 3234111000006112  
16 3234121000006116  
17 3234131000006118  
18 3238841000006110  
19 324069016  
20 3240901000006116  
21 3252201000006112  
22 3252211000006110  
23 3252221000006119  
24 3252231000006116  
25 3252241000006114  
26 3252251000006111  
27 3252261000006113  
28 3254841000006116  
29 3254851000006119  
30 3254861000006117  
31 3254871000006112  
32 3254881000006110  
33 3254891000006113  
34 3255201000006118  
35 3261731000006112  
36 3261741000006119  
37 3264441000006114  
38 3264451000006111  
39 3264471000006118  
40 3264481000006115  
41 3264491000006117  
42 3264681000006117  
43 3284101000006116  
44 3284111000006118  
45 3284121000006114  
46 3284131000006112  
47 3285721000006114  
48 3285731000006112  
49 3285741000006119  
50 3285751000006117

For peer review only

1 3285761000006115  
2 3285771000006110  
3 3285791000006111  
4 3285801000006112  
5 328581000006116  
6 3285811000006110  
7 328741000006117  
8 3292101000006111  
9 3293531000006117  
10 3299771000006111  
11 3299781000006114  
12 3299791000006112  
13 3299801000006113  
14 3299811000006111  
15 330401000006113  
16 330639014  
17 3308471000006116  
18 3308481000006118  
19 3308491000006115  
20 3308511000006114  
21 3308521000006118  
22 3312291000006119  
23 3316471000006115  
24 3323021000006110  
25 3330021000006115  
26 3330031000006117  
27 3330041000006110  
28 3330051000006112  
29 3333861000006113  
30 3333871000006118  
31 3333881000006115  
32 3333891000006117  
33 3336471000006114  
34 3336911000006114  
35 3338771000006115  
36 3338781000006117  
37 3338791000006119  
38 3338911000006110  
39 3338921000006119  
40 3338931000006116  
41 3338941000006114  
42 3343541000006113  
43 3345711000006115  
44 3345721000006111  
45 3345731000006114  
46 3346141000006112  
47 3346441000006119  
48 3350991000006118  
49 3351001000006117  
50 3351011000006119

For peer review only



1  
2 3351021000006110  
3 3351031000006113  
4 3351041000006115  
5 335843013  
6 3364751000006111  
7 3364761000006113  
8 3364771000006118  
9 3364781000006115  
10 3368051000006115  
11 3369481000006110  
12 3370061000006111  
13 3375351000006116  
14 3375361000006119  
15 3377951000006114  
16 3377961000006111  
17 3377971000006116  
18 3377981000006118  
19 3377991000006115  
20 3378001000006113  
21 3380961000006117  
22 3383331000006119  
23 3383341000006112  
24 3383351000006114  
25 3383361000006111  
26 3387071000006114  
27 3387081000006112  
28 3388321000006112  
29 3388331000006110  
30 3394031000006116  
31 3394281000006110  
32 3398261000006112  
33 3398271000006117  
34 3398461000006113  
35 3398591000006118  
36 3398601000006114  
37 3398611000006112  
38 3398621000006116  
39 3398631000006118  
40 3398771000006113  
41 3398781000006111  
42 340421000006119  
43 3404331000006111  
44 3404341000006118  
45 340511000006111  
46 340541000006110  
47 340561000006114  
48 3406611000006116  
49 3406621000006112  
50 3406631000006110  
51 3406641000006117

For peer review only

1  
2 3408821000006112  
3 3416681000006113  
4 3416691000006111  
5 3417691000006113  
6 3417701000006113  
7 3417711000006111  
8 3418911000006113  
9 341965018  
10  
11 3420501000006112  
12 3420511000006110  
13 3420521000006119  
14 3420531000006116  
15 3422131000006112  
16 342807011  
17 342834014  
18 342851019  
19 3428621000006117  
20 3434381000006116  
21 3434401000006116  
22 3434561000006119  
23 3435751000006114  
24 3435761000006111  
25 3435771000006116  
26 3435791000006115  
27 3435941000006110  
28 3435951000006112  
29 3437891000006118  
30 3437901000006119  
31 3443161000006112  
32 3443171000006117  
33 3444851000006118  
34 3444861000006116  
35 3446351000006115  
36 3446711000006115  
37 3457851000006113  
38 3457861000006110  
39 3461481000006118  
40 3461501000006111  
41 3461511000006114  
42 3462271000006111  
43 3464151000006115  
44 3464161000006118  
45 3466821000006112  
46 3466841000006117  
47 3466871000006113  
48 3466881000006111  
49 3466891000006114  
50 3467831000006112  
51 3479091000006118  
52 3479101000006112  
53  
54  
55  
56  
57  
58  
59  
60

For peer review only

1  
2 3479111000006110  
3 3479121000006119  
4 3479131000006116  
5 3479981000006117  
6 3479991000006119  
7  
8 3480001000006113  
9 3480011000006111  
10 3483481000006117  
11 3484451000006110  
12  
13 3492821000006113  
14 3494641000006114  
15 3494651000006111  
16 3494671000006118  
17  
18 350661000006112  
19 3508581000006116  
20 3508601000006114  
21 350891000006117  
22 3511981000006117  
23 3511991000006119  
24 3512001000006117  
25 3512011000006119  
26 3514081000006118  
27 3514091000006115  
28 351561000006117  
29 351571000006112  
30 3516121000006110  
31 3516131000006113  
32 3516141000006115  
33 3518181000006113  
34 3518191000006111  
35 3518201000006114  
36 3518223019  
37 3519021000006116  
38 3519071000006115  
39 3519101000006113  
40 3519261000006119  
41 3519271000006114  
42 3519281000006112  
43 3519291000006110  
44 3519301000006111  
45 352061000006117  
46 352151000006115  
47 352301000006116  
48 352391000006111  
49 352621000006117  
50 3527891000006114  
51 3527901000006113  
52 3527911000006111  
53 352831000006115  
54 3530721000006115  
55  
56  
57  
58  
59  
60

For peer review only

1  
2 3530731000006117  
3 3530741000006110  
4 3530751000006112  
5 353141000006114  
6 353181000006115  
7 3534781000006112  
8 3534801000006111  
9 3534841000006113  
10 3534941000006115  
11 3534951000006118  
12 3534961000006116  
13 3534971000006111  
14 3534981000006114  
15 353561000006116  
16 353751000006110  
17 353772013  
18 353861000006119  
19 354051000006110  
20 3540651000006115  
21 3541581000006115  
22 354341016  
23 354343018  
24 3544191000006110  
25 3544201000006113  
26 354425018  
27 354426017  
28 354521013  
29 354571000006114  
30 3549071000006114  
31 3549251000006113  
32 3549261000006110  
33 3549271000006115  
34 355091000006117  
35 355331000006118  
36 3553591000006116  
37 355381000006117  
38 355531000006112  
39 355535015  
40 355536019  
41 355537011  
42 355581000000118  
43 355661000006119  
44 355671000006114  
45 355711000006113  
46 35572018  
47 3559191000006114  
48 3559201000006112  
49 3561311000006114  
50 3561321000006118  
51 3567381000006110

For peer review only

1  
2 3567391000006113  
3 3568251000006114  
4 357001000006115  
5 357211000006112  
6 357561000006112  
7 3577041000006113  
8 3577061000006112  
9 3577071000006117  
10 3577081000006119  
11 3580871000006115  
12 3580881000006117  
13 3581621000006112  
14 3581631000006110  
15 3581641000006117  
16 3581651000006115  
17 3581661000006118  
18 358301000006119  
19 358331000006110  
20 358404011  
21 358471000006117  
22 358781000006110  
23 358791000006113  
24 3591861000006118  
25 3591871000006113  
26 3591891000006114  
27 3591901000006113  
28 3592381000006111  
29 3592391000006114  
30 3592401000006111  
31 359271000006110  
32 359281000006113  
33 359291000006111  
34 3594381000006119  
35 359459016  
36 3603191000006113  
37 3603201000006111  
38 3612301000006111  
39 3614221000006117  
40 3614571000006118  
41 3616461000006119  
42 3616471000006114  
43 3619421000006119  
44 3620201000006112  
45 3620211000006110  
46 3620221000006119  
47 3621151000006111  
48 3622621000006116  
49 3622631000006118  
50 3626831000006118  
51 3627301000006117

For peer review only

1  
2 3628711000006119  
3 3628721000006110  
4 3628791000006112  
5 3630631000006117  
6 363511000006114  
7 363521000006118  
8 3636643017  
9 3636644011  
10 3636954012  
11 3641061000006111  
12 3641071000006116  
13 3644991000006118  
14 3647371000006113  
15 3647391000006114  
16 3647401000006111  
17 365231000000114  
18 365651000000117  
19 3658451000006113  
20 3658461000006110  
21 3658491000006119  
22 3659761000006112  
23 3659771000006117  
24 3659781000006119  
25 366011000000119  
26 3660131000006115  
27 3660141000006113  
28 3662121000006119  
29 3662131000006116  
30 3662141000006114  
31 3662151000006111  
32 3662161000006113  
33 3662171000006118  
34 3662181000006115  
35 3662191000006117  
36 3662201000006119  
37 3662211000006116  
38 3662221000006112  
39 3662231000006110  
40 3662241000006117  
41 3662411000006115  
42 3662431000006114  
43 3671061000006110  
44 3671071000006115  
45 3674171000006116  
46 3674181000006118  
47 3674191000006115  
48 3674201000006117  
49 3674221000006110  
50 3674231000006113  
51 3674241000006115

For peer review only

1 3678231000006119  
2 3678241000006112  
3 3678791000006113  
4 3678801000006114  
5 3678811000006112  
6 3678821000006116  
7 3678831000006118  
8 3678841000006111  
9 3678851000006113  
10 3678861000006110  
11 3678871000006115  
12 3678881000006117  
13 3683521000006119  
14 3685901000006116  
15 3685911000006118  
16 3685921000006114  
17 3686581000006113  
18 3686591000006111  
19 3687101000006113  
20 3687771000006118  
21 3695141000006115  
22 3695151000006118  
23 3695161000006116  
24 3697811000006117  
25 3697821000006113  
26 3697831000006111  
27 3697841000006118  
28 3697851000006116  
29 3697861000006119  
30 3699291000006117  
31 3699301000006116  
32 3699311000006118  
33 3699321000006114  
34 370111000006119  
35 370161000006116  
36 370171000006111  
37 370201000006110  
38 3702781000006112  
39 3703771000006117  
40 3703781000006119  
41 3704012  
42 3707501000006111  
43 3707511000006114  
44 3707521000006118  
45 3707531000006115  
46 3708791000006113  
47 3708801000006114  
48 3708811000006112  
49 3709541000006117  
50 3709551000006115

For peer review only

1  
2 3709561000006118  
3 3709571000006113  
4 3709581000006111  
5 3709591000006114  
6 3709601000006118  
7  
8 3709611000006115  
9 3709621000006111  
10 3709631000006114  
11 3711491000006112  
12  
13 3711501000006116  
14 3711511000006118  
15 3714981000006118  
16 3714991000006115  
17 3718101000006115  
18  
19 3721291000006116  
20 3722811000006117  
21 3722821000006113  
22 3722831000006111  
23 3722841000006118  
24  
25 3722851000006116  
26 3724731000006113  
27 3724741000006115  
28 3734751000006115  
29 3734761000006118  
30 3734771000006113  
31 3734781000006111  
32 3735761000006117  
33 3735771000006112  
34 3735781000006110  
35 3735791000006113  
36 3735801000006114  
37 3735811000006112  
38 3735821000006116  
39 3735831000006118  
40 3735841000006111  
41 3735851000006113  
42 3737091000006118  
43 3737101000006112  
44 3741301000006118  
45 3741871000006119  
46 3745771000006113  
47 3745791000006114  
48 3745801000006110  
49 3750471000006112  
50 3750481000006110  
51 3750491000006113  
52 3752561000006117  
53 3752591000006113  
54 3752601000006117  
55 3756761000006114

For peer review only



1  
2 3756771000006119  
3 3756781000006116  
4 3756791000006118  
5 3759331000006111  
6 3759341000006118  
7 3759351000006116  
8 3759361000006119  
9 3759991000006111  
10 3760001000006118  
11 3763421000006110  
12 3763431000006113  
13 3763441000006115  
14 3766851000006113  
15 3766861000006110  
16 3766871000006115  
17 3766881000006117  
18 3766901000006115  
19 3766911000006117  
20 3766921000006113  
21 376769011  
22 376791000006111  
23 376842018  
24 376843011  
25 376848019  
26 376849010  
27 376870016  
28 376938017  
29 376939013  
30 3771831000006118  
31 3771841000006111  
32 3771851000006113  
33 3771861000006110  
34 3773701000006119  
35 3773711000006116  
36 3773721000006112  
37 3773731000006110  
38 3773741000006117  
39 3775781000006112  
40 3776181000006115  
41 378182015  
42 3782101000006115  
43 378528014  
44 378529018  
45 378691015  
46 3787041000006119  
47 3787051000006117  
48 378851016  
49 378881000000114  
50 3789351000006112  
51 3789361000006114

For peer review only

1  
2 379088010  
3 379089019  
4 379223011  
5 379246013  
6 379315011  
7 379770011  
8 380059013  
9 380092019  
10 380093012  
11 380094018  
12 380095017  
13 380110012  
14 380129018  
15 380137014  
16 380139012  
17 380145016  
18 380146015  
19 380180017  
20 380193010  
21 3802001000006115  
22 380206018  
23 380211016  
24 380242014  
25 3802491000006115  
26 3812911000006119  
27 3812921000006110  
28 3820851000006117  
29 3820861000006115  
30 3824461000006113  
31 3827371000006116  
32 3827381000006118  
33 3827391000006115  
34 3827401000006118  
35 3827411000006115  
36 3827421000006111  
37 3828101000006111  
38 3828111000006114  
39 3828121000006118  
40 3828131000006115  
41 3832091000006117  
42 3832101000006111  
43 3832111000006114  
44 3835461000006114  
45 3835471000006119  
46 3835481000006116  
47 3835491000006118  
48 3838051000006113  
49 3838061000006110  
50 3838081000006117  
51 3843581000006117

For peer review only

1  
2 3845541000006112  
3 3845551000006114  
4 3845561000006111  
5 3845571000006116  
6 3845591000006115  
7  
8 3851331000006114  
9 3851361000006117  
10 3851371000006112  
11 3852661000006118  
12  
13 3852671000006113  
14 3852681000006111  
15 3852691000006114  
16 3852701000006114  
17 3854301000006116  
18 3854311000006118  
19  
20 3854321000006114  
21 3854331000006112  
22 3855041000006115  
23 3855061000006116  
24 3855071000006111  
25 3855431000006116  
26 3855441000006114  
27 3855461000006113  
28  
29 3858291000006114  
30 3858311000006113  
31 3858321000006117  
32 3865661000006115  
33 3865671000006110  
34 3865681000006113  
35 3865781000006119  
36 3865791000006116  
37 3865801000006115  
38 3865811000006117  
39 387151000006114  
40 387171000006116  
41 3873481000006117  
42 3873491000006119  
43 3873501000006110  
44 387551000006116  
45 3875711000006119  
46 3877151000006110  
47 3877161000006112  
48 3877171000006117  
49 3877181000006119  
50 388171000006115  
51 3882431000006115  
52 3882441000006113  
53 3882451000006110  
54 3882461000006112  
55 388991000006116  
56  
57  
58  
59  
60

For peer review only

1  
2 3891081000006116  
3 3891091000006118  
4 3891101000006112  
5 3891111000006110  
6 3891121000006119  
7 3891131000006116  
8 3891141000006114  
9 3897081000006111  
10 3897091000006114  
11 3897101000006115  
12 3897111000006117  
13 3898741000006115  
14 3898751000006118  
15 3898761000006116  
16 3898771000006111  
17 3898781000006114  
18 3898791000006112  
19 3898801000006113  
20 3898811000006111  
21 3898821000006115  
22 3898831000006117  
23 3898841000006110  
24 3898851000006112  
25 3898861000006114  
26 3898871000006119  
27 3902291000006114  
28 3902301000006110  
29 3902311000006113  
30 3902321000006117  
31 3903141000006117  
32 3907641000006117  
33 3908461000006119  
34 3908471000006114  
35 3908481000006112  
36 3908491000006110  
37 3908501000006119  
38 3908511000006116  
39 3908521000006112  
40 3908531000006110  
41 3908541000006117  
42 3908551000006115  
43 3908561000006118  
44 3920291000006118  
45 3920301000006117  
46 3920311000006119  
47 3926021000006110  
48 3929811000006119  
49 3929841000006115  
50 3931301000006114  
51 3931411000006119

For peer review only

1 3933091000006116  
2 3934021000006116  
3 3934051000006113  
4 3934061000006110  
5 3934071000006115  
6 3936561000006112  
7 3936571000006117  
8 3936591000006116  
9 3939831000006111  
10 3944811000006117  
11 3944821000006113  
12 3944831000006111  
13 3944841000006118  
14 3944851000006116  
15 3944861000006119  
16 3944871000006114  
17 3944881000006112  
18 3948111000006116  
19 3953661000006119  
20 3956771000006112  
21 3956781000006110  
22 3956791000006113  
23 3958781000006114  
24 3958791000006112  
25 3959661000006116  
26 3959671000006111  
27 396091000006118  
28 3961011000006115  
29 3961031000006114  
30 3961041000006116  
31 3961051000006119  
32 396111000006110  
33 396121000006119  
34 396131000006116  
35 3961571000006115  
36 3961581000006117  
37 3961591000006119  
38 3961601000006110  
39 396161000006113  
40 3961611000006113  
41 396171000006118  
42 396191000006117  
43 396251000006115  
44 396281000006111  
45 3962951000006114  
46 3962961000006111  
47 3962971000006116  
48 3962981000006118  
49 3962991000006115  
50 3963001000006119

For peer review only

1  
2 396301000006110  
3 3963011000006116  
4 3963021000006112  
5 3963031000006110  
6 3963041000006117  
7 3963051000006115  
8 3963061000006118  
9 396381000006118  
10 396461000006117  
11 396471000006112  
12 396481000006110  
13 396491000006113  
14 396501000006117  
15 396511000006119  
16 396521000006110  
17 396531000006113  
18 396541000006115  
19 396551000006118  
20 396561000006116  
21 396571000006111  
22 396581000006114  
23 396591000006112  
24 396601000006116  
25 396611000006118  
26 396631000006112  
27 396641000006119  
28 396651000006117  
29 3967601000006115  
30 3967611000006117  
31 3967621000006113  
32 3974511000006118  
33 3974521000006114  
34 398291000006110  
35 398366019  
36 398367011  
37 398873019  
38 399051000006116  
39 399447011  
40 399621000006119  
41 399681000006115  
42 399811000006111  
43 4005241000006117  
44 4005711000006114  
45 4005731000006115  
46 4005901000006114  
47 4005911000006112  
48 4005971000006115  
49 4005981000006117  
50 4006001000006118  
51 4006091000006113

For peer review only

1 4006111000006116  
2 4006121000006112  
3 4006141000006117  
4 4006161000006118  
5 4006171000006113  
6 4006181000006111  
7 4006251000006111  
8 4006261000006113  
9 4006321000006114  
10 4006361000006115  
11 4006371000006110  
12 4006431000006117  
13 4006471000006119  
14 4006571000006115  
15 4006581000006117  
16 4006591000006119  
17 4006611000006113  
18 4006671000006116  
19 4006721000006113  
20 4006741000006118  
21 4006791000006110  
22 4006821000006118  
23 4006891000006116  
24 4006901000006117  
25 4006911000006119  
26 4006951000006118  
27 4007001000006116  
28 4007011000006118  
29 4007031000006112  
30 4007151000006118  
31 4007281000006118  
32 4007411000006114  
33 4007421000006118  
34 4007441000006113  
35 4007501000006112  
36 4007531000006116  
37 4007551000006111  
38 4007571000006118  
39 4007581000006115  
40 4007601000006113  
41 4007621000006115  
42 4007641000006110  
43 4007691000006118  
44 4007701000006118  
45 4007711000006115  
46 4007721000006111  
47 4007761000006117  
48 4007771000006112  
49 4007781000006110  
50 4007811000006112

For peer review only

1  
2 4007851000006113  
3 4007931000006111  
4 4007961000006119  
5 4008071000006111  
6 4008091000006112  
7 4008111000006115  
8 4008151000006119  
9 4008431000006116  
10 4008441000006114  
11 4008481000006115  
12 4008551000006112  
13 4008561000006114  
14 4008581000006116  
15 4008751000006115  
16 4008811000006113  
17 400882012  
18 400883019  
19 4008831000006119  
20 4008941000006119  
21 4008961000006115  
22 4009001000006111  
23 4009041000006113  
24 4009131000006119  
25 4009141000006112  
26 4009151000006114  
27 4009161000006111  
28 4009181000006118  
29 4009331000006117  
30 4009341000006110  
31 4009351000006112  
32 4009541000006118  
33 401562011  
34 4016651000006112  
35 4016721000006111  
36 4024291000006115  
37 4024431000006115  
38 4024441000006113  
39 4024451000006110  
40 4024501000006112  
41 4024631000006117  
42 4024671000006119  
43 4024691000006118  
44 4025111000006118  
45 4025411000006113  
46 4025431000006119  
47 4025471000006116  
48 4025551000006110  
49 4025571000006117  
50 4025601000006112  
51 4025671000006118  
52  
53  
54  
55  
56  
57  
58  
59  
60

For peer review only



1 4025681000006115  
2 4025711000006119  
3 4025751000006118  
4 4025791000006112  
5 4025841000006110  
6 4025861000006114  
7 4025931000006110  
8 4025991000006114  
9 4026031000006119  
10 4026111000006112  
11 4026181000006117  
12 4026251000006117  
13 4026261000006115  
14 4026331000006116  
15 4026491000006110  
16 4026501000006119  
17 4026511000006116  
18 4026521000006112  
19 4026641000006116  
20 4026681000006110  
21 4026951000006110  
22 4027021000006119  
23 4027041000006114  
24 4027071000006118  
25 4027191000006116  
26 4027231000006114  
27 4027261000006117  
28 4027291000006113  
29 4027341000006111  
30 4027361000006110  
31 4027381000006117  
32 4027531000006112  
33 4027561000006115  
34 4027611000006117  
35 4027671000006114  
36 4027691000006110  
37 4027731000006119  
38 4027801000006119  
39 4027831000006110  
40 4027871000006113  
41 4027961000006114  
42 4027991000006118  
43 4028011000006114  
44 4028031000006115  
45 4028071000006117  
46 4028121000006117  
47 4028161000006111  
48 4028181000006118  
49 4028211000006119  
50 4028231000006113

For peer review only

1  
2 4028251000006118  
3 4028271000006111  
4 4028291000006112  
5 4028311000006111  
6 4028341000006110  
7 4028371000006119  
8 4028411000006118  
9 4028441000006119  
10 4028461000006115  
11 4028491000006111  
12 4028711000006112  
13 4028781000006117  
14 4028861000006117  
15 4028891000006113  
16 4028921000006119  
17 4029041000006115  
18 4029161000006117  
19 4029361000006119  
20 4029421000006119  
21 4029471000006118  
22 4029781000006111  
23 4029791000006114  
24 4029801000006110  
25 4029811000006113  
26 4030171000006115  
27 4030271000006110  
28 4030281000006113  
29 4030291000006111  
30 4030301000006112  
31 4030311000006110  
32 4031001000006115  
33 4031011000006117  
34 4031021000006113  
35 4031031000006111  
36 4031041000006118  
37 4031061000006119  
38 4031071000006114  
39 4031081000006112  
40 4031091000006110  
41 4031101000006116  
42 4031141000006119  
43 4031151000006117  
44 4031161000006115  
45 4031171000006110  
46 4031201000006114  
47 4031211000006112  
48 4031221000006116  
49 4031231000006118  
50 4031711000006119  
51 4031721000006110

For peer review only

1 4032021000006118  
2 4032361000006114  
3 4032371000006119  
4 4032901000006112  
5 4032911000006110  
6 4032931000006116  
7 4032941000006114  
8 4033321000006112  
9 4033331000006110  
10 4033341000006117  
11 4033831000006118  
12 4033841000006111  
13 4033851000006113  
14 4033861000006110  
15 4033891000006119  
16 4033901000006115  
17 4034021000006111  
18 4034031000006114  
19 4034041000006116  
20 4034101000006119  
21 4034111000006116  
22 4034121000006112  
23 4034191000006114  
24 4034201000006112  
25 4034211000006110  
26 4034221000006119  
27 4034231000006116  
28 4034241000006114  
29 4034361000006115  
30 4034421000006115  
31 4034431000006117  
32 4034441000006110  
33 4034451000006112  
34 4034461000006114  
35 4034471000006119  
36 4034481000006116  
37 4034491000006118  
38 4034561000006110  
39 4034571000006115  
40 4034581000006117  
41 4034591000006119  
42 4034891000006116  
43 4034901000006117  
44 4034921000006110  
45 4034931000006113  
46 4034941000006115  
47 4034951000006118  
48 4035171000006112  
49 4035181000006110  
50 4035191000006113

For peer review only

1  
2 4035201000006111  
3 4035211000006114  
4 4035221000006118  
5 4035241000006113  
6 4035251000006110  
7 4035261000006112  
8 4035271000006117  
9 4035281000006119  
10 4035291000006116  
11 4035331000006111  
12 4035341000006118  
13 4035351000006116  
14 4035361000006119  
15 4035371000006114  
16 4035381000006112  
17 4035391000006110  
18 4035451000006111  
19 4035461000006113  
20 4035471000006118  
21 4035711000006116  
22 4035731000006110  
23 4035741000006117  
24 4035751000006115  
25 4035761000006118  
26 4035771000006113  
27 4035781000006111  
28 4035801000006110  
29 4035811000006113  
30 4036471000006111  
31 4036481000006114  
32 4036491000006112  
33 4036501000006116  
34 4036581000006113  
35 4036591000006111  
36 4036641000006118  
37 4036651000006116  
38 403673017  
39 403674011  
40 403682011  
41 4036841000006117  
42 4036851000006115  
43 4036861000006118  
44 4036871000006113  
45 403688010  
46 4036881000006111  
47 403689019  
48 4036891000006114  
49 4036901000006113  
50 403691010  
51 4036911000006111

For peer review only

1  
2 4036921000006115  
3 403697014  
4 403698016  
5 403700013  
6 403701012  
7 403702017  
8 403704016  
9 403735010  
10 4037381000006119  
11 4037391000006116  
12 4037421000006112  
13 4037431000006110  
14 4037511000006115  
15 403752014  
16 4037521000006111  
17 403753016  
18 4037531000006114  
19 403754010  
20 4037541000006116  
21 403755011  
22 403757015  
23 403758013  
24 403760010  
25 403762019  
26 403771011  
27 4037801000006116  
28 4037811000006118  
29 4037821000006114  
30 4037831000006112  
31 4037841000006119  
32 4037851000006117  
33 4037871000006110  
34 4037881000006113  
35 4038061000006114  
36 4038071000006119  
37 4038081000006116  
38 4038091000006118  
39 4038101000006112  
40 4038311000006113  
41 4038321000006117  
42 4038371000006116  
43 4038381000006118  
44 4039011000006116  
45 4039211000006111  
46 4039431000006118  
47 4039611000006114  
48 4039691000006116  
49 4039701000006116  
50 4039711000006118  
51 4039721000006114

For peer review only

1  
2 4039731000006112  
3 4039741000006119  
4 4039751000006117  
5 4039761000006115  
6 4039781000006113  
7  
8 4039791000006111  
9 4039801000006112  
10 4040231000006113  
11 4040241000006115  
12  
13 4040561000006119  
14 4040571000006114  
15 4040601000006119  
16 4040611000006116  
17 4040621000006112  
18  
19 4040631000006110  
20 4040851000006119  
21 4040861000006117  
22 4040871000006112  
23  
24 4040881000006110  
25 4041001000006116  
26 4041011000006118  
27 4041021000006114  
28 4041031000006112  
29  
30 4041041000006119  
31 4041061000006115  
32 4041071000006110  
33 4041081000006113  
34 4041091000006111  
35  
36 4041371000006113  
37 4041481000006119  
38 4041491000006116  
39 4041501000006112  
40 4041881000006117  
41 4041891000006119  
42  
43 4041901000006115  
44 4041911000006117  
45 4041951000006116  
46 4041961000006119  
47  
48 4041971000006114  
49 4041981000006112  
50 4042021000006119  
51 4042031000006116  
52 4042041000006114  
53  
54 4042081000006115  
55 4042091000006117  
56 4042101000006111  
57 4042161000006112  
58 4042171000006117  
59 4042181000006119  
60 4042191000006116

For peer review only

1 4042201000006118  
2 4042461000006116  
3 4042481000006114  
4 4045391000006111  
5 4045401000006113  
6 404801000006116  
7 405091000006115  
8 4052521000006112  
9 4052531000006110  
10 405501000006119  
11 406052010  
12 406054011  
13 406263015  
14 406265010  
15 406266011  
16 406281017  
17 406332017  
18 406333010  
19 406399011  
20 40641000006114  
21 406831000006117  
22 407801000000116  
23 4091191000006116  
24 4091221000006111  
25 409844012  
26 409845013  
27 410798015  
28 411225019  
29 411399019  
30 411465018  
31 41171000006115  
32 412051000006115  
33 413089014  
34 413202011  
35 413204012  
36 413205013  
37 413207017  
38 413210012  
39 413211011  
40 413216018  
41 414174013  
42 414230016  
43 414253015  
44 414849013  
45 4153551000006118  
46 4153561000006116  
47 4161771000006110  
48 4161781000006113  
49 4161801000006112  
50 4161811000006110

For peer review only

1  
2 4161821000006119  
3 4161831000006116  
4 4162001000006110  
5 4162981000006119  
6 4162991000006116  
7  
8 4163071000006114  
9 4163111000006118  
10 4163201000006114  
11 4163211000006112  
12 4163231000006118  
13 4163251000006113  
14 4163281000006117  
15 4163371000006112  
16 4163431000006119  
17 4163451000006114  
18 4163481000006118  
19 4163491000006115  
20 4163501000006111  
21 4163511000006114  
22 4163531000006115  
23 4163551000006110  
24 4163611000006110  
25 4163631000006116  
26 4169541000006111  
27 4170281000006118  
28 4170301000006119  
29 4170321000006112  
30 4170401000006111  
31 4170421000006118  
32 4170491000006116  
33 4170501000006112  
34 4170521000006119  
35 4170531000006116  
36 4170551000006111  
37 4170561000006113  
38 4170581000006115  
39 4170641000006110  
40 4170661000006114  
41 4170671000006119  
42 4170681000006116  
43 4170691000006118  
44 4170711000006115  
45 4170731000006114  
46 4170751000006119  
47 4170771000006112  
48 4170791000006113  
49 4170841000006111  
50 4170851000006113  
51 4171121000006117  
52 4171141000006112

For peer review only



1  
2 4171161000006111  
3 4171191000006115  
4 4171631000006110  
5 4171751000006113  
6 4172041000006118  
7  
8 4172061000006119  
9 4172071000006114  
10 4172241000006111  
11 4172801000006113  
12  
13 4172861000006114  
14 4173001000006110  
15 4173011000006113  
16 4173021000006117  
17 4173811000006119  
18  
19 420481000006112  
20 4213071000006113  
21 4213081000006111  
22 4213091000006114  
23 4213101000006115  
24 4213111000006117  
25 4213121000006113  
26 4213131000006111  
27 4213141000006118  
28 4213161000006119  
29 4213401000006114  
30 4213421000006116  
31 422941000006114  
32 424694018  
33 424811000006114  
34 424992017  
35 424994016  
36 424998018  
37 424999014  
38 42511000033112  
39 4255441000006118  
40 4255451000006116  
41 4255461000006119  
42 4255491000006110  
43 4255511000006116  
44 4255521000006112  
45 4255531000006110  
46 4255541000006117  
47 4255561000006118  
48 4255571000006113  
49 4255591000006114  
50 4255601000006118  
51 4255631000006114  
52 4255641000006116  
53 4255681000006110  
54 4255691000006113  
55  
56  
57  
58  
59  
60

For peer review only

1  
2 4255711000006111  
3 4255751000006112  
4 4255791000006118  
5 4255801000006117  
6 4255821000006110  
7  
8 4255831000006113  
9 4255891000006112  
10 4255901000006111  
11 4255911000006114  
12  
13 425771000006113  
14 425781000006111  
15 42611000033113  
16 4309891000006114  
17 4309901000006113  
18 4309911000006111  
19 4309921000006115  
20 4309931000006117  
21  
22 4317311000006115  
23 4356671000006114  
24 4383051000006110  
25 4383061000006112  
26 4383071000006117  
27 4383081000006119  
28 4383091000006116  
29 4383101000006110  
30 4383151000006114  
31 4383161000006111  
32 4383171000006116  
33 4388391000006112  
34 4388411000006112  
35 4388771000006110  
36 4388781000006113  
37 4388791000006111  
38 4389291000006114  
39 4389301000006110  
40 4389311000006113  
41 4389431000006114  
42 4389441000006116  
43 4389451000006119  
44 4389821000006113  
45 4389831000006111  
46 4389841000006118  
47 4389851000006116  
48 4389861000006119  
49 4390021000006111  
50 4390031000006114  
51 4390041000006116  
52 4390821000006118  
53 4390831000006115  
54 4390841000006113

For peer review only

1  
2 4390851000006110  
3 4391201000006119  
4 4391221000006112  
5 4391241000006117  
6 4392351000006116  
7 4392361000006119  
8 4392371000006114  
9 4392381000006112  
10 4392391000006110  
11 4392411000006110  
12 4392421000006119  
13 4392461000006113  
14 4392471000006118  
15 4392481000006115  
16 4392491000006117  
17 4392501000006113  
18 4395061000006112  
19 4395071000006117  
20 4396721000006111  
21 4400181000006119  
22 4400191000006116  
23 4400201000006118  
24 4400211000006115  
25 4400221000006111  
26 4400231000006114  
27 4400331000006118  
28 4400341000006111  
29 4400371000006115  
30 4400381000006117  
31 4400401000006117  
32 4400441000006115  
33 4409441000006113  
34 4409451000006110  
35 4409461000006112  
36 4409471000006117  
37 4409481000006119  
38 4409491000006116  
39 4409501000006112  
40 4409511000006110  
41 4409521000006119  
42 4409531000006116  
43 4409541000006114  
44 4409551000006111  
45 4409561000006113  
46 441041000006116  
47 441141000006117  
48 4411971000006112  
49 4411981000006110  
50 4412001000006110  
51 441201000006112

For peer review only

1 4412761000006114  
2 4413191000006111  
3 4413981000006111  
4 4413991000006114  
5 4414001000006117  
6 4414011000006119  
7 4414031000006113  
8 4416071000006117  
9 4416161000006111  
10 4417601000006116  
11 4418001000006112  
12 4418121000006118  
13 4418131000006115  
14 4418141000006113  
15 4418151000006110  
16 4418161000006112  
17 4418181000006119  
18 4418191000006116  
19 4418201000006118  
20 4418211000006115  
21 4418221000006111  
22 4418231000006114  
23 4418241000006116  
24 4418251000006119  
25 4418261000006117  
26 4418271000006112  
27 4418281000006110  
28 4418291000006113  
29 4418301000006114  
30 4418311000006112  
31 4418321000006116  
32 4418331000006118  
33 4418341000006111  
34 4418351000006113  
35 4418361000006110  
36 4418371000006115  
37 4418381000006117  
38 4418401000006117  
39 4418411000006119  
40 4418441000006115  
41 4418451000006118  
42 4418481000006114  
43 4418491000006112  
44 4418501000006116  
45 4418511000006118  
46 4418541000006119  
47 4418561000006115  
48 4418571000006110  
49 4418671000006114  
50 4418681000006112

For peer review only

1 4418701000006110  
2 4418711000006113  
3 4418721000006117  
4 4418741000006112  
5 4418751000006114  
6 4418761000006111  
7 4418771000006116  
8 4419861000006112  
9 4419871000006117  
10 4419881000006119  
11 4419891000006116  
12 4419911000006119  
13 4419921000006110  
14 4421251000006116  
15 4421271000006114  
16 444773019  
17 444834014  
18 446271000006110  
19 446281000006113  
20 4505481000006113  
21 4505491000006111  
22 450901012  
23 451081018  
24 451428019  
25 453241012  
26 453301018  
27 454085011  
28 454091013  
29 454201010  
30 455404011  
31 455405012  
32 456846015  
33 457109011  
34 457110018  
35 457111019  
36 457307018  
37 457318018  
38 457319014  
39 459378019  
40 459399016  
41 459501013  
42 459527013  
43 4596013  
44 459719019  
45 459732012  
46 4613511000006111  
47 4613531000006117  
48 4641101000006112  
49 4641121000006119  
50 4641131000006116

For peer review only

1  
2 4641151000006111  
3 4641171000006118  
4 4641191000006117  
5 4641211000006116  
6 4641251000006115  
7 4641351000006114  
8 4641361000006111  
9 4641381000006118  
10 4670841000006112  
11 4670851000006114  
12 4673961000006113  
13 472961000000117  
14 473311000000110  
15 473369018  
16 473991000000119  
17 4743781000006113  
18 4743791000006111  
19 4745221000006116  
20 4745231000006118  
21 4745241000006111  
22 4745251000006113  
23 4745261000006110  
24 4745301000006118  
25 4745311000006115  
26 4745321000006111  
27 4745331000006114  
28 4745341000006116  
29 4745351000006119  
30 4745381000006110  
31 4745391000006113  
32 4745411000006113  
33 4745421000006117  
34 4745441000006112  
35 4745451000006114  
36 4745461000006111  
37 4745471000006116  
38 4745481000006118  
39 4745491000006115  
40 4745501000006111  
41 4745511000006114  
42 4745551000006110  
43 4745571000006117  
44 4745621000006119  
45 4745641000006114  
46 4745651000006111  
47 4745661000006113  
48 4745681000006115  
49 4745691000006117  
50 4745711000006119  
51 4745721000006110

For peer review only

1  
2 4745741000006115  
3 4745761000006116  
4 4745781000006114  
5 4745801000006113  
6 4745821000006115  
7  
8 4745831000006117  
9 4745841000006110  
10 4745861000006114  
11 4745881000006116  
12  
13 4745891000006118  
14 4745901000006119  
15 4745931000006110  
16 4745941000006117  
17 4745951000006115  
18 4745961000006118  
19  
20 4745971000006113  
21 4745981000006111  
22 4746011000006113  
23 4746021000006117  
24 4746031000006119  
25 4746041000006112  
26 4746081000006118  
27 4746091000006115  
28 4746111000006112  
29 4746121000006116  
30 4746151000006113  
31 4746161000006110  
32 4746171000006115  
33 4746191000006119  
34 4746201000006116  
35 4746211000006118  
36 4746221000006114  
37 4746251000006117  
38 4746261000006115  
39 4746271000006110  
40 4746301000006112  
41 4746311000006110  
42 4746321000006119  
43 4746331000006116  
44 4746341000006114  
45 4746351000006111  
46 4746361000006113  
47 4746371000006118  
48 4746391000006117  
49 4746401000006115  
50 4746431000006111  
51 4746461000006119  
52 4746471000006114  
53 4746491000006110  
54 4746501000006119

For peer review only

1  
2 4746541000006117  
3 4746551000006115  
4 4746571000006113  
5 4746581000006111  
6 4746601000006118  
7  
8 4746611000006115  
9 4746621000006111  
10 4746631000006114  
11 4746641000006116  
12  
13 4746661000006117  
14 4746681000006110  
15 4746691000006113  
16 4746701000006113  
17 4746711000006111  
18  
19 4746721000006115  
20 4746751000006112  
21 4746761000006114  
22 4746771000006119  
23  
24 4746781000006116  
25 4746811000006119  
26 4746821000006110  
27 4746841000006115  
28 4746851000006118  
29 4746871000006111  
30 4746881000006114  
31 4746901000006111  
32 4746941000006113  
33 4746951000006110  
34 4746971000006117  
35 4746981000006119  
36 4746991000006116  
37  
38 474703011  
39 4747031000006116  
40 4747041000006114  
41 4747061000006113  
42 4747081000006115  
43 4747101000006111  
44 4747111000006114  
45 4747141000006113  
46 4747151000006110  
47 4747171000006117  
48 4747261000006117  
49 4747281000006110  
50 4747311000006112  
51 4747321000006116  
52 4747341000006111  
53 4747351000006113  
54 4747371000006115  
55 4747381000006117  
56 4747391000006119  
57  
58  
59  
60

For peer review only



1  
2 4747401000006117  
3 4747431000006113  
4 4747451000006118  
5 4747501000006116  
6 4747541000006119  
7  
8 4747591000006111  
9 4747681000006112  
10 4747701000006110  
11 4747711000006113  
12  
13 4747741000006112  
14 4747751000006114  
15 4747771000006116  
16 4747781000006118  
17 4747791000006115  
18  
19 4747811000006116  
20 4747821000006112  
21 4747831000006110  
22 4747861000006118  
23 4747871000006113  
24  
25 4747901000006113  
26 4747921000006115  
27 4748061000006112  
28 4748181000006118  
29 4748231000006113  
30 4748281000006114  
31 4748331000006117  
32 4748651000006115  
33 4748911000006110  
34 4748931000006116  
35 4748941000006114  
36 4748961000006113  
37 4748981000006115  
38 4749171000006112  
39 4749341000006118  
40 4749431000006116  
41 4749451000006111  
42 4749501000006113  
43 4749761000006118  
44 4749771000006113  
45 4749881000006118  
46 4749921000006114  
47 4749931000006112  
48 4749951000006117  
49 4749961000006115  
50 4749971000006110  
51 4749991000006111  
52 4750001000006111  
53 4750011000006114  
54 4750021000006118  
55 4750031000006115  
56  
57  
58  
59  
60

For peer review only

1  
2 4750051000006110  
3 4750061000006112  
4 4750071000006117  
5 4750091000006116  
6 4750101000006110  
7  
8 4750111000006113  
9 4750131000006119  
10 4750141000006112  
11 4750161000006111  
12 4750171000006116  
13 4750181000006118  
14 4750191000006115  
15 4750201000006117  
16 4750221000006110  
17 4750231000006113  
18 4750271000006111  
19 4750281000006114  
20 4750301000006113  
21 4750321000006115  
22 4750341000006110  
23 4750351000006112  
24 4750361000006114  
25 4750381000006116  
26 4750401000006116  
27 4750411000006118  
28 4750421000006114  
29 4750431000006112  
30 4750441000006119  
31 4750461000006115  
32 4750501000006115  
33 4750521000006113  
34 4750531000006111  
35 4750551000006116  
36 4750601000006119  
37 4750621000006112  
38 4750651000006115  
39 4750711000006112  
40 4750721000006116  
41 4750771000006115  
42 4750781000006117  
43 4750881000006110  
44 4751011000006118  
45 4751071000006110  
46 4751081000006113  
47 4751131000006113  
48 4751141000006115  
49 4751161000006116  
50 4751171000006111  
51 4751301000006119  
52 4751311000006116

For peer review only

1  
2 4751321000006112  
3 4751331000006110  
4 4751341000006117  
5 4752881000006111  
6 4755801000006111  
7 4755991000006112  
8 4756261000006118  
9 4757001000006110  
10 4757011000006113  
11 4757021000006117  
12 4757031000006119  
13 4757051000006114  
14 4757231000006112  
15 4757241000006119  
16 4757251000006117  
17 4757261000006115  
18 4757301000006112  
19 4757311000006110  
20 4757321000006119  
21 4757441000006118  
22 4758631000006113  
23 4769111000006114  
24 4770721000006119  
25 4779091000006113  
26 4819961000006110  
27 4820271000006112  
28 4821071000006111  
29 482537012  
30 482641017  
31 482690017  
32 482691018  
33 482730011  
34 482731010  
35 482732015  
36 482733013  
37 482734019  
38 482737014  
39 482740014  
40 482741013  
41 4829241000006112  
42 4829711000006115  
43 485870016  
44 4908911000006112  
45 494336018  
46 495731000000114  
47 5028061000006116  
48 5028071000006111  
49 5093451000006111  
50 510029018  
51 510045016

For peer review only

1  
2 510061019  
3 510074013  
4 510113012  
5 5109371000006119  
6 5109381000006116  
7 5109391000006118  
8 511250010  
9 511385013  
10 51216011  
11 51325019  
12 5141031000006112  
13 514881000000112  
14 514941000000113  
15 517221000000116  
16 517341000000116  
17 517421000000115  
18 517661000000114  
19 525371000006119  
20 525391000006118  
21 531851000006119  
22 531861000006117  
23 5324051000006110  
24 5324061000006112  
25 5324071000006117  
26 5324081000006119  
27 5324201000006117  
28 5324491000006111  
29 5325181000006119  
30 5325191000006116  
31 5325351000006113  
32 5325561000006115  
33 5325571000006110  
34 533321000006119  
35 5336451000006114  
36 5340261000006111  
37 5340271000006116  
38 5340291000006115  
39 5340301000006119  
40 5340311000006116  
41 5340321000006112  
42 5343061000006111  
43 5343071000006116  
44 5343091000006115  
45 5343101000006114  
46 5343111000006112  
47 5343121000006116  
48 5343131000006118  
49 5344681000006113  
50 5344691000006111  
51 5344701000006111

For peer review only

1 5344711000006114  
2 5344721000006118  
3 5344731000006115  
4 5344741000006113  
5 5344791000006116  
6 5345241000006118  
7 5346461000006110  
8 5347121000006111  
9 5347161000006117  
10 5347171000006112  
11 5347211000006114  
12 5347221000006118  
13 5347301000006115  
14 5347601000006114  
15 5347611000006112  
16 5347621000006116  
17 5347631000006118  
18 5347731000006110  
19 5347751000006115  
20 5347761000006118  
21 5347771000006113  
22 5347781000006111  
23 5347831000006119  
24 5347841000006112  
25 5348521000006116  
26 5348531000006118  
27 5348541000006111  
28 5348551000006113  
29 5351161000006113  
30 5351181000006115  
31 5351491000006113  
32 5351501000006117  
33 5351511000006119  
34 5351521000006110  
35 5351531000006113  
36 535221000006113  
37 5352591000006118  
38 5353081000006115  
39 5353091000006117  
40 5353101000006111  
41 5353111000006114  
42 5353161000006112  
43 535331000006115  
44 5353931000006117  
45 5353941000006110  
46 5354481000006112  
47 5355201000006117  
48 5355211000006119  
49 5355221000006110  
50 5355231000006113

For peer review only

1 5355241000006115  
2 5355251000006118  
3 5355261000006116  
4 5355271000006111  
5 5355361000006114  
6 5355381000006116  
7 5355391000006118  
8 535541000006116  
9 5355601000006119  
10 5355751000006113  
11 5355791000006119  
12 5356031000006112  
13 5356051000006117  
14 5356621000006115  
15 535711000006110  
16 535731000006116  
17 535981000006118  
18 536081000006111  
19 536301000006117  
20 536561000006111  
21 536641000006113  
22 536651000006110  
23 536751000006117  
24 536981000006110  
25 536991000006113  
26 537001000006117  
27 537011000006119  
28 537021000006110  
29 537051000006118  
30 543041000006111  
31 543111000006111  
32 543481000006111  
33 543771000006118  
34 543811000006118  
35 544411000006119  
36 5499111000006111  
37 5499131000006117  
38 5499151000006112  
39 5499171000006119  
40 5499191000006118  
41 5500611000006115  
42 5501461000006111  
43 5503871000006115  
44 5503881000006117  
45 5503911000006117  
46 5505961000006115  
47 5505981000006113  
48 5506011000006110  
49 5506021000006119  
50 5506031000006116

For peer review only

1 5506051000006111  
2 5506061000006113  
3 5506071000006118  
4 5511561000006114  
5 5511581000006116  
6 5511591000006118  
7 5511601000006114  
8 5511611000006112  
9 5511621000006116  
10 5511671000006115  
11 5511681000006117  
12 5511691000006119  
13 5523391000006118  
14 5523431000006112  
15 552511000006110  
16 5526171000006110  
17 5526181000006113  
18 5526191000006111  
19 5526201000006114  
20 5526211000006112  
21 5526221000006116  
22 5526231000006118  
23 5526241000006111  
24 5526251000006113  
25 552641000006110  
26 552661000006114  
27 5560011000006114  
28 556501000000116  
29 556511000000119  
30 5567511000006116  
31 5567521000006112  
32 5567531000006110  
33 5572871000006116  
34 5572881000006118  
35 557371000006110  
36 557381000006113  
37 557391000006111  
38 557401000006113  
39 557411000006111  
40 5579641000006115  
41 5579661000006116  
42 5579671000006111  
43 5579681000006114  
44 5579691000006112  
45 5579701000006112  
46 5579711000006110  
47 5590681000006113  
48 5590691000006111  
49 5591731000006111  
50 5591761000006119

For peer review only

1  
2 5591791000006110  
3 5591801000006111  
4 5591821000006118  
5 5591831000006115  
6 5591851000006110  
7  
8 5591861000006112  
9 5591871000006117  
10 5591881000006119  
11 5595371000006112  
12 5595381000006110  
13  
14 560131000000110  
15 560151000000115  
16 5601531000006114  
17 5601541000006116  
18 560201000000113  
19  
20 5602071000006112  
21 5602081000006110  
22 5608261000006111  
23 5608271000006116  
24  
25 5645721000006112  
26 5645731000006110  
27 5704031000006110  
28 5707081000006118  
29 5707101000006114  
30 5707151000006113  
31 5707161000006110  
32 5723731000006119  
33 5726761000006117  
34 5726781000006110  
35 573501000006117  
36 573611000006118  
37 5778961000006119  
38 5778971000006114  
39 5900061000006117  
40 5911401000006116  
41 5911411000006118  
42 5911421000006114  
43 5911431000006112  
44 5911441000006119  
45 5911451000006117  
46 5911771000006115  
47 5911781000006117  
48 5911801000006118  
49 5912131000006112  
50 5912141000006119  
51 5912151000006117  
52 5912161000006115  
53 5912171000006110  
54 5912991000006114  
55 5913031000006119

For peer review only



1  
2 5915541000006116  
3 5969991000006119  
4 5970011000006113  
5 5970261000006115  
6 59846018  
7  
8 598561000000110  
9 598801000000114  
10 59921000006116  
11 604681000006112  
12 6051931000006117  
13 6052161000006116  
14 6053471000006110  
15 6053491000006111  
16 6056051000006116  
17 606941000006115  
18 622681000000119  
19 62349016  
20 62350016  
21 62351017  
22 6242751000006114  
23 6242761000006111  
24 6242781000006118  
25 6242811000006116  
26 6242821000006112  
27 6242831000006110  
28 6242841000006117  
29 6242861000006118  
30 6242871000006113  
31 6242881000006111  
32 6242891000006114  
33 6242901000006113  
34 6242911000006111  
35 6242921000006115  
36 6242941000006110  
37 6242951000006112  
38 6242961000006114  
39 6242971000006119  
40 6242981000006116  
41 6243001000006117  
42 6243011000006119  
43 6243031000006113  
44 6243041000006115  
45 6243051000006118  
46 6243071000006111  
47 6243091000006112  
48 6243101000006118  
49 6243111000006115  
50 6243131000006114  
51 6243141000006116  
52 6243151000006119

For peer review only

1  
2 6243161000006117  
3 6243171000006112  
4 6243181000006110  
5 6243191000006113  
6 6243241000006113  
7 6243261000006112  
8 6243291000006116  
9 6243301000006115  
10 6243371000006114  
11 6243381000006112  
12 6243391000006110  
13 6243401000006112  
14 6243411000006110  
15 6243421000006119  
16 6243441000006114  
17 6243491000006117  
18 6243501000006113  
19 6243511000006111  
20 6243541000006110  
21 6243551000006112  
22 6243561000006114  
23 6243591000006118  
24 6243601000006114  
25 6243611000006112  
26 6243621000006116  
27 6243641000006111  
28 6243651000006113  
29 6243661000006110  
30 6243671000006115  
31 6243691000006119  
32 6243701000006119  
33 6243711000006116  
34 6243721000006112  
35 6243731000006110  
36 6243741000006117  
37 6243761000006118  
38 6243771000006113  
39 6243791000006114  
40 6243821000006117  
41 6243831000006119  
42 6243841000006112  
43 6243851000006114  
44 6243861000006111  
45 6243881000006118  
46 6243891000006115  
47 6243901000006116  
48 6243911000006118  
49 6243921000006114  
50 6243931000006112  
51 6243941000006119

For peer review only

1  
2 6243951000006117  
3 6243961000006115  
4 6243971000006110  
5 6243981000006113  
6 6243991000006111  
7  
8 6244001000006119  
9 6244011000006116  
10 6244021000006112  
11 6244031000006110  
12 6244041000006117  
13 6244051000006115  
14 6244071000006113  
15 6244081000006111  
16 6244091000006114  
17 6244101000006115  
18 6244111000006117  
19 6244121000006113  
20 6244141000006118  
21 6244151000006116  
22 6244161000006119  
23 6244171000006114  
24 6244181000006112  
25 6244191000006110  
26 6244201000006113  
27 6244211000006111  
28 6244221000006115  
29 6244231000006117  
30 6244241000006110  
31 6244251000006112  
32 6244261000006114  
33 6244271000006119  
34 6244281000006116  
35 6244291000006118  
36 6244311000006119  
37 6244321000006110  
38 6244331000006113  
39 6244351000006118  
40 6244361000006116  
41 6244371000006111  
42 6244381000006114  
43 6244401000006114  
44 6244411000006112  
45 6244421000006116  
46 6244431000006118  
47 6244441000006111  
48 6244451000006113  
49 6244471000006115  
50 6244481000006117  
51 6244491000006119  
52 6244501000006110

For peer review only

1  
2 6244511000006113  
3 6244541000006112  
4 6244561000006111  
5 6244571000006116  
6 6244581000006118  
7 6244591000006115  
8 6244601000006111  
9 6244611000006114  
10 6244621000006118  
11 6244631000006115  
12 6244641000006113  
13 6244671000006117  
14 6244691000006116  
15 6244701000006116  
16 6244711000006118  
17 6244731000006112  
18 6244741000006119  
19 6244751000006117  
20 6244761000006115  
21 6244771000006110  
22 6244781000006113  
23 6244791000006111  
24 6244801000006112  
25 6244811000006110  
26 6244821000006119  
27 6244831000006116  
28 6244851000006111  
29 6244871000006118  
30 6244881000006115  
31 6244891000006117  
32 6244901000006118  
33 6244911000006115  
34 6244931000006114  
35 6244941000006116  
36 6244951000006119  
37 6244971000006112  
38 6244991000006113  
39 6245001000006118  
40 6245011000006115  
41 6245031000006114  
42 6245061000006117  
43 6245081000006110  
44 6245101000006119  
45 6245111000006116  
46 6245131000006110  
47 6245151000006115  
48 6245161000006118  
49 6245171000006113  
50 6245181000006111  
51 6245201000006112

For peer review only

1  
2 6245211000006110  
3 6245221000006119  
4 6245231000006116  
5 6245251000006111  
6 6245271000006118  
7  
8 6245281000006115  
9 6245291000006117  
10 6245301000006116  
11 6245321000006114  
12 6245341000006119  
13  
14 6245351000006117  
15 6245361000006115  
16 6245381000006113  
17 6245391000006111  
18 6245401000006113  
19  
20 6245411000006111  
21 6245421000006115  
22 6245441000006110  
23 6245451000006112  
24 6245461000006114  
25 6245491000006118  
26 6245501000006114  
27 6245511000006112  
28 6245521000006116  
29 6245541000006111  
30 6245551000006113  
31 6245561000006110  
32 6245571000006115  
33 6245581000006117  
34 6245591000006119  
35 6245601000006110  
36 6245611000006113  
37 6245621000006117  
38 6245631000006119  
39 6245651000006114  
40 6245661000006111  
41 6245671000006116  
42 6245681000006118  
43 6245701000006115  
44 6245711000006117  
45 6245721000006113  
46 6245731000006111  
47 6245741000006118  
48 6245751000006116  
49 6245781000006112  
50 6245791000006110  
51 6245801000006111  
52 6245811000006114  
53 6245821000006118  
54 6245831000006115

For peer review only

1  
2 6245841000006113  
3 6245861000006112  
4 6245871000006117  
5 6245881000006119  
6 6245891000006116  
7 6245901000006117  
8 6245921000006110  
9 6245931000006113  
10 6245941000006115  
11 6245951000006118  
12 6245961000006116  
13 6245971000006111  
14 6245981000006114  
15 6245991000006112  
16 6246001000006113  
17 6246011000006111  
18 6246021000006115  
19 6246031000006117  
20 6246051000006112  
21 6246061000006114  
22 6246081000006116  
23 6246091000006118  
24 6246121000006119  
25 6246131000006116  
26 6246151000006111  
27 6246161000006113  
28 6246171000006118  
29 6246191000006117  
30 6246201000006119  
31 6246241000006117  
32 6246251000006115  
33 6246261000006118  
34 6246271000006113  
35 6246281000006111  
36 6246301000006110  
37 6246311000006113  
38 6246321000006117  
39 6246331000006119  
40 6246341000006112  
41 6246351000006114  
42 6246361000006111  
43 6246371000006116  
44 6246381000006118  
45 6246391000006115  
46 6246401000006118  
47 6246411000006115  
48 6246421000006111  
49 6246431000006114  
50 6246441000006116  
51 6246451000006119

For peer review only

1 6246461000006117  
2 6246471000006112  
3 6246481000006110  
4 6246501000006117  
5 6246511000006119  
6 6246531000006113  
7 6246541000006115  
8 6246551000006118  
9 6246561000006116  
10 6246571000006111  
11 6246581000006114  
12 6246591000006112  
13 6246601000006116  
14 6246611000006118  
15 6246621000006114  
16 6246631000006112  
17 6246651000006117  
18 6246661000006115  
19 6246671000006110  
20 6246681000006113  
21 6246691000006111  
22 6246701000006111  
23 6246711000006114  
24 6246721000006118  
25 6246731000006115  
26 6246741000006113  
27 6246751000006110  
28 6246761000006112  
29 6246771000006117  
30 6246781000006119  
31 6246791000006116  
32 6246801000006115  
33 6246881000006112  
34 6246891000006110  
35 6246901000006114  
36 6246931000006118  
37 6246951000006113  
38 6246961000006110  
39 6246971000006115  
40 6246981000006117  
41 6246991000006119  
42 6247001000006110  
43 6247011000006113  
44 6247021000006117  
45 6247031000006119  
46 6247041000006112  
47 6247051000006114  
48 6247061000006111  
49 6247071000006116  
50 6247081000006118

For peer review only

1  
2 6247091000006115  
3 6247101000006114  
4 6247291000006111  
5 6247301000006112  
6 6247311000006110  
7 6247321000006119  
8 6247331000006116  
9 6247341000006114  
10 6247351000006111  
11 6247361000006113  
12 6247371000006118  
13 6247381000006115  
14 6247431000006111  
15 6247451000006116  
16 6247461000006119  
17 6247471000006114  
18 6247551000006115  
19 6247561000006118  
20 6247571000006113  
21 6247591000006114  
22 6247661000006117  
23 6247671000006112  
24 6247681000006110  
25 6247701000006113  
26 6247711000006111  
27 6247721000006115  
28 6247731000006117  
29 6247741000006110  
30 6247751000006112  
31 6247761000006114  
32 6247771000006119  
33 6247781000006116  
34 6247791000006118  
35 6247801000006117  
36 6247811000006119  
37 6247821000006110  
38 6247831000006113  
39 6247841000006115  
40 6247851000006118  
41 6247871000006111  
42 6247881000006114  
43 6247891000006112  
44 6247901000006111  
45 6247911000006114  
46 6247931000006115  
47 6247941000006113  
48 6247961000006112  
49 6247971000006117  
50 6248051000006113  
51 6248061000006110

For peer review only



1 6248091000006119  
2 6248101000006113  
3 6248111000006111  
4 6248121000006115  
5 6248131000006117  
6 6248191000006118  
7 6248201000006115  
8 6248211000006117  
9 6248221000006113  
10 6248231000006111  
11 6248241000006118  
12 6250431000006110  
13 62561000000111  
14 62821000000118  
15 6300131000006118  
16 6300141000006111  
17 6331111000006112  
18 6331141000006111  
19 633341000006117  
20 6362181000006119  
21 6362191000006116  
22 6362211000006115  
23 6362221000006111  
24 6362301000006114  
25 6362311000006112  
26 6362321000006116  
27 6362341000006111  
28 6362351000006113  
29 6362361000006110  
30 6362371000006115  
31 6362381000006117  
32 6362481000006114  
33 6362531000006112  
34 6362541000006119  
35 6363601000006114  
36 6363611000006112  
37 6363631000006118  
38 6363641000006111  
39 6363661000006110  
40 6363951000006117  
41 6364031000006110  
42 6364061000006118  
43 6364091000006114  
44 6364401000006114  
45 6364411000006112  
46 6364471000006115  
47 6364531000006119  
48 6364541000006112  
49 6364691000006116  
50 6364841000006114

For peer review only

1  
2 6377241000006110  
3 638721000000113  
4 638821000000118  
5 638841000000113  
6 6411000033115  
7 641301000000114  
8 643521000006115  
9 6461711000006114  
10 6461721000006118  
11 6461731000006115  
12 6461751000006110  
13 6461761000006112  
14 6461771000006117  
15 647651000006119  
16 6478621000006110  
17 6478631000006113  
18 6478641000006115  
19 6478651000006118  
20 6478661000006116  
21 6478671000006111  
22 6481041000006112  
23 6481051000006114  
24 6481061000006111  
25 6481191000006119  
26 6481201000006116  
27 6481211000006118  
28 650001000006114  
29 651081000006111  
30 6551781000006115  
31 6557191000006111  
32 6557231000006118  
33 6557241000006111  
34 6611411000006117  
35 6611421000006113  
36 6611431000006111  
37 6616721000006113  
38 6616731000006111  
39 6616741000006118  
40 6616751000006116  
41 6616761000006119  
42 6620961000006112  
43 6620971000006117  
44 6620981000006119  
45 6621001000006115  
46 6631771000006113  
47 6632101000006112  
48 6632121000006119  
49 6632561000006116  
50 6632581000006114  
51 6633061000006117

For peer review only

1  
2 6633201000006112  
3 6635341000006115  
4 6635361000006116  
5 6635471000006115  
6 6635791000006111  
7  
8 6670291000006110  
9 6682641000006111  
10 6691671000006111  
11 6691681000006114  
12 6691691000006112  
13 6691701000006112  
14 6692551000006113  
15  
16 6711000033112  
17 6719331000006114  
18 6719341000006116  
19 6719351000006119  
20 6719361000006117  
21 6719371000006112  
22 6719391000006113  
23 6719401000006110  
24 6719411000006113  
25  
26 677251000006118  
27 677861000006117  
28 677871000006112  
29 677881000006110  
30 678501000006119  
31 678521000006112  
32 679461000006112  
33 679471000006117  
34 680761000006117  
35 682691000006117  
36 6830821000006117  
37 6830861000006111  
38 6830901000006116  
39 6830921000006114  
40 6845831000006112  
41 6861851000006110  
42 6861871000006117  
43 6886631000006112  
44 6893931000006111  
45 6895451000006111  
46 6895461000006113  
47 6895471000006118  
48 6895481000006115  
49 6906531000006119  
50 6908591000006119  
51 6909731000006119  
52 6909741000006112  
53 6931041000006119  
54 6948581000006111  
55  
56  
57  
58  
59  
60

For peer review only

1 6948591000006114  
2 6948601000006118  
3 6948611000006115  
4 6955711000006116  
5 6955721000006112  
6 695991000006116  
7 6968521000006115  
8 700141000006113  
9 7005001000006119  
10 7005021000006112  
11 702131000006116  
12 704711000006119  
13 705211000006111  
14 7083431000006116  
15 7083441000006114  
16 7087461000006119  
17 7087471000006114  
18 7092901000006112  
19 7093841000006111  
20 7105791000006115  
21 7105801000006119  
22 711081000006111  
23 711111000006117  
24 711121000006113  
25 711171000006114  
26 711181000006112  
27 71291000006110  
28 71331000006115  
29 71351000006110  
30 71371000006117  
31 714661000000115  
32 716861000006117  
33 716911000006110  
34 717021000006115  
35 719021000006111  
36 719931000006113  
37 720001000006119  
38 720011000006116  
39 720021000006112  
40 720031000006110  
41 720041000006117  
42 720051000006115  
43 720161000006119  
44 720341000006115  
45 720451000006113  
46 720461000006110  
47 720471000006115  
48 720481000006117  
49 720491000006119  
50 720501000006110

For peer review only

1 720511000006113  
2 720521000006117  
3 720531000006119  
4 720561000006111  
5 720571000006116  
6 720581000006118  
7 720591000006115  
8 720631000006115  
9 720761000006115  
10 720791000006111  
11 720801000006112  
12 720951000006119  
13 720961000006117  
14 720991000006113  
15 721041000006111  
16 721051000006113  
17 721091000006119  
18 721171000006119  
19 721271000006114  
20 721291000006110  
21 721311000006114  
22 721351000006110  
23 721361000006112  
24 721391000006116  
25 721421000006112  
26 721481000006111  
27 721601000006117  
28 721621000006110  
29 721701000006112  
30 721721000006119  
31 721751000006111  
32 721821000006114  
33 721851000006117  
34 721871000006110  
35 721881000006113  
36 721961000006111  
37 721991000006115  
38 722341000006119  
39 722361000006115  
40 722421000006115  
41 722441000006110  
42 722471000006119  
43 722481000006116  
44 722511000006112  
45 722521000006116  
46 722541000006111  
47 7227221000006112  
48 722761000006119  
49 722871000006117  
50 722901000006117

For peer review only

1  
2 722911000006119  
3 722961000006116  
4 722981000006114  
5 723001000006113  
6 723031000006117  
7 723111000006110  
8 723221000006112  
9 723281000006111  
10 723301000006110  
11 723321000006117  
12 723341000006112  
13 723391000006115  
14 723401000006118  
15 723441000006116  
16 723451000006119  
17 723501000006117  
18 723541000006115  
19 723571000006111  
20 723601000006116  
21 723641000006119  
22 723801000006115  
23 723951000006113  
24 724051000006110  
25 724311000006111  
26 724401000006116  
27 724411000006118  
28 724421000006114  
29 7246031000006118  
30 7246041000006111  
31 7246061000006110  
32 724621000006112  
33 724641000006117  
34 724671000006113  
35 724681000006111  
36 724721000006116  
37 724761000006110  
38 724781000006117  
39 724791000006119  
40 724841000006116  
41 724881000006110  
42 724891000006113  
43 724901000006112  
44 725101000006111  
45 725121000006118  
46 725151000006110  
47 725191000006116  
48 725221000006111  
49 725241000006116  
50 725271000006112  
51 725451000006118

For peer review only

1  
2 725611000006117  
3 725711000006113  
4 725761000006111  
5 725771000006116  
6 725811000006116  
7 725861000006118  
8 725951000006112  
9 726021000006110  
10 726071000006111  
11 7260711000006119  
12 7260721000006110  
13 7260731000006113  
14 726141000006116  
15 726201000006111  
16 726261000006112  
17 726271000006117  
18 726331000006111  
19 726351000006116  
20 726361000006119  
21 726371000006114  
22 726561000006114  
23 726631000006118  
24 726641000006111  
25 727151000006117  
26 727181000006113  
27 7272621000006110  
28 727281000006117  
29 727321000006111  
30 727381000006110  
31 727511000006114  
32 727521000006118  
33 727531000006115  
34 727561000006112  
35 7276151000006113  
36 727731000006113  
37 727761000006116  
38 727771000006111  
39 727781000006114  
40 727791000006112  
41 727841000006110  
42 727911000006116  
43 7279491000006117  
44 7281251000006119  
45 728201000006110  
46 728451000006110  
47 728461000006112  
48 728471000006117  
49 728481000006119  
50 728491000006116  
51 729281000006113

For peer review only

1  
2 729291000006111  
3 729301000006112  
4 729311000006110  
5 729321000006119  
6 729331000006116  
7 729341000006114  
8 729351000006111  
9 729361000006113  
10 729371000006118  
11 729381000006115  
12 729391000006117  
13 729401000006115  
14 729411000006117  
15 729421000006113  
16 729431000006111  
17 729441000006118  
18 729451000006116  
19 729461000006119  
20 729471000006114  
21 729481000006112  
22 729491000006110  
23 729501000006119  
24 729511000006116  
25 729521000006112  
26 729531000006110  
27 729541000006117  
28 729551000006115  
29 729561000006118  
30 7295671000006113  
31 729571000006113  
32 729581000006111  
33 729591000006114  
34 729601000006118  
35 729611000006115  
36 730001000006117  
37 730011000006119  
38 730021000006110  
39 730031000006113  
40 730041000006115  
41 730241000006113  
42 730251000006110  
43 730491000006117  
44 732441000006113  
45 7327551000006114  
46 732861000006110  
47 733371000006119  
48 733601000006114  
49 7347041000006119  
50 7347131000006113  
51 7347901000006115  
52  
53  
54  
55  
56  
57  
58  
59  
60

For peer review only



1  
2 7347911000006117  
3 7351931000006117  
4 7358381000006114  
5 7358421000006116  
6 7358481000006117  
7  
8 7359031000006117  
9 7359041000006110  
10 7359051000006112  
11 7361281000006119  
12  
13 7364181000006113  
14 7364661000006113  
15 7366751000006111  
16 7368081000006118  
17 7369071000006110  
18 7369701000006118  
19  
20 7373061000006114  
21 739801000006115  
22 74591000006110  
23 746191000000115  
24 7508781000006118  
25 753161000000117  
26 755631000006110  
27 755671000006113  
28 7559601000006119  
29 7577631000006119  
30 7577641000006112  
31 7577651000006114  
32 7577661000006111  
33 7577671000006116  
34 7577681000006118  
35 7694901000006113  
36 7819601000006111  
37 7828931000006112  
38 7828941000006119  
39 799181000006112  
40 8029401000006113  
41 8029421000006115  
42 8052161000006111  
43 8052181000006118  
44 8078541000006118  
45 81281000006117  
46 8232021000006114  
47 8232041000006119  
48 8232061000006115  
49 8235031000006119  
50 824221000006113  
51 825711000006111  
52 825771000006119  
53 825841000006115  
54 83391000006114  
55  
56  
57  
58  
59  
60

For peer review only

1  
2 83411000006114  
3 83431000006115  
4 83441000006113  
5 83451000006110  
6 841331000006115  
7  
8 84190018  
9 844951000006111  
10 853151000006113  
11 853821000006110  
12  
13 855531000006114  
14 861611000006111  
15 867621000006111  
16 867631000006114  
17 867661000006117  
18 867671000006112  
19 867681000006110  
20  
21 877611000006114  
22 878631000006116  
23 878841000006110  
24 879681000006114  
25 879691000006112  
26 879701000006112  
27 879711000006110  
28 879721000006119  
29 879731000006116  
30 879811000006118  
31 879821000006114  
32 879891000006111  
33 879911000006113  
34 879921000006117  
35 879931000006119  
36 879951000006114  
37 879961000006111  
38 879971000006116  
39 880021000006116  
40 880031000006118  
41 880041000006111  
42 880051000006113  
43 880061000006110  
44 880071000006115  
45 880081000006117  
46 880091000006119  
47 880111000006111  
48 880131000006117  
49 880141000006110  
50 880151000006112  
51 880161000006114  
52 880171000006119  
53 880181000006116  
54 880191000006118

For peer review only

1 880201000006115  
2 880211000006117  
3 880221000006113  
4 880231000006111  
5 880241000006118  
6 880251000006116  
7 880261000006119  
8 880271000006114  
9 880281000006112  
10 880291000006110  
11 880301000006111  
12 880311000006114  
13 880321000006118  
14 880331000006115  
15 880341000006113  
16 880351000006110  
17 880361000006112  
18 880371000006117  
19 880381000006119  
20 880391000006116  
21 880411000006116  
22 880421000006112  
23 880431000006110  
24 880441000006117  
25 880461000006118  
26 880471000006113  
27 880481000006111  
28 880491000006114  
29 880501000006118  
30 880511000006115  
31 880521000006111  
32 880531000006114  
33 880541000006116  
34 880551000006119  
35 880561000006117  
36 880571000006112  
37 880581000006110  
38 880591000006113  
39 880601000006117  
40 880611000006119  
41 880621000006110  
42 880631000006113  
43 880641000006115  
44 880651000006118  
45 880661000006116  
46 880671000006111  
47 880681000006114  
48 880691000006112  
49 880701000006112  
50 880711000006110

For peer review only

1  
2 880721000006119  
3 880741000006114  
4 880751000006111  
5 880761000006113  
6 880771000006118  
7  
8 881181000006112  
9 881191000006110  
10 881201000006113  
11 881221000006115  
12  
13 881251000006112  
14 881261000006114  
15 881271000006119  
16 881281000006116  
17 881291000006118  
18  
19 881301000006117  
20 881311000006119  
21 888171000006117  
22 892311000006114  
23 893291000006118  
24  
25 906971000006110  
26 907001000006115  
27 907021000006113  
28 907041000006118  
29 907061000006119  
30 907091000006110  
31 907101000006116  
32 907111000006118  
33 907121000006114  
34 907261000006110  
35 907331000006114  
36 907341000006116  
37 907351000006119  
38 907361000006117  
39 907371000006112  
40 907381000006110  
41 907391000006113  
42 907401000006110  
43 907431000006119  
44 908781000006110  
45 910131000006114  
46 910191000006113  
47 928731000006117  
48 928751000006112  
49 928781000006116  
50 931991000006113  
51 932121000006116  
52 932481000006112  
53 933251000006113  
54 939971000006111  
55 940011000006113

For peer review only

1  
2 940021000006117  
3 940031000006119  
4 940041000006112  
5 96271000006111  
6 97982010  
7  
8 980021000006113  
9 982801000006112  
10 988581000006116  
11 988741000006117  
12 988751000006115  
13 988761000006118  
14 988801000006110  
15 989501000006115  
16 990551000006111  
17 990561000006113  
18 990571000006118  
19 990581000006115  
20 991771000006115  
21  
22  
23  
24  
25  
26  
27  
28  
29  
30  
31  
32  
33  
34  
35  
36  
37  
38  
39  
40  
41  
42  
43  
44  
45  
46  
47  
48  
49  
50  
51  
52  
53  
54  
55  
56  
57  
58  
59  
60

For peer review only

|    |                                                                           |
|----|---------------------------------------------------------------------------|
| 1  |                                                                           |
| 2  | Term                                                                      |
| 3  | cause of learning disabilities: brain tumour                              |
| 4  | adverse reaction to drugs used in malignant disease and immunosuppression |
| 5  | adverse reaction to sex hormones and antagonists in malignant disease     |
| 6  | adverse reaction to oestrogens in malignant diseases                      |
| 7  | adverse reaction to progestogens in malignant disease                     |
| 8  | mesothelioma                                                              |
| 9  | stewart-treves syndrome                                                   |
| 10 | teratoma of descended testis                                              |
| 11 | teratoma of testis                                                        |
| 12 | teratoma of undescended testis                                            |
| 13 | synovial osteochondromatosis of lesser mtp joint                          |
| 14 | synovial osteochondromatosis of mcp joint                                 |
| 15 | synovial osteochondromatosis of pip joint of finger                       |
| 16 | polyp of colon                                                            |
| 17 | colonic polyp                                                             |
| 18 | melanoma in situ of skin structure of scalp and/or neck                   |
| 19 | cystosarcoma phyllodes                                                    |
| 20 | erythroplasia                                                             |
| 21 | carcinoma in situ of skin of head and neck                                |
| 22 | osteoma                                                                   |
| 23 | secondary malignant neoplasm of other digestive organ                     |
| 24 | secondary malignant neoplasm of other respiratory organs                  |
| 25 | secondary and unspec malig neop anterior cervical ln                      |
| 26 | secondary and unspec malig neop circumflex iliac ln                       |
| 27 | secondary and unspec malig neop coeliac lymph nodes                       |
| 28 | secondary and unspec malig neop common iliac lymph nodes                  |
| 29 | secondary and unspec malig neop deep cervical ln                          |
| 30 | secondary and unspec malig neop deep inguinal lymph nodes                 |
| 31 | secondary and unspec malig neop deep parotid lymph nodes                  |
| 32 | secondary and unspec malig neop diaphragmatic lymph nodes                 |
| 33 | secondary and unspec malig neop inferior epigastric ln                    |
| 34 | secondary and unspec malig neop inferior mesenteric ln                    |
| 35 | secondary and unspec malig neop inferior tracheobronchial ln              |
| 36 | secondary and unspec malig neop infraclavicular lymph nodes               |
| 37 | secondary and unspec malig neop intercostal lymph nodes                   |
| 38 | secondary and unspec malig neop internal iliac lymph nodes                |
| 39 | secondary and unspec malig neop internal mammary lymph nodes              |
| 40 | secondary and unspec malig neop obturator lymph nodes                     |
| 41 | secondary and unspec malig neop of facial lymph nodes                     |
| 42 | secondary and unspec malig neop pectoral lymph nodes                      |
| 43 | secondary and unspec malig neop popliteal lymph nodes                     |
| 44 | secondary and unspec malig neop pulmonary lymph nodes                     |
| 45 | secondary and unspec malig neop sacral lymph nodes                        |
| 46 | secondary and unspec malig neop submandibular lymph nodes                 |
| 47 | secondary and unspec malig neop submental lymph nodes                     |
| 48 | secondary and unspec malig neop superficial cervical ln                   |
| 49 | secondary and unspec malig neop superficial inguinal ln                   |
| 50 | secondary and unspec malig neop supratrochlear lymph nodes                |
| 51 | secondary and unspec malignant neoplasm mastoid lymph nodes               |
| 52 |                                                                           |
| 53 |                                                                           |
| 54 |                                                                           |
| 55 |                                                                           |
| 56 |                                                                           |
| 57 |                                                                           |
| 58 |                                                                           |
| 59 |                                                                           |
| 60 |                                                                           |

1 rectal carcinoma  
 2 overlapping lesion of other and unspecified parts of mouth  
 3 acinar cell tumor  
 4 [m]adenomatous and adenocarcinomatous polyps  
 5 [m]adenomatous and adenocarcinomatous polyps of colon  
 6 [m]adenomatous or adenocarcinomatous polyp nos  
 7 [m]apocrine adenoma or adenocarcinoma nos  
 8 blood vessel tumor  
 9 [m]ceruminous adenoma and adenocarcinoma  
 10 [m]clear cell adenoma or adenocarcinoma nos  
 11 [m]clear cell adenomas and adenocarcinomas  
 12 [m]cystadenoma and carcinoma  
 13 [m]cystadenoma or carcinoma nos  
 14 giant cell tumor  
 15 giant cell tumor of bone  
 16 hemangioendothelioma  
 17 [m]infiltrating ductular carcinoma  
 18 mesonephric tumor  
 19 mesothelioma (malignant, clinical disorder)  
 20 [m]mixed cell adenoma or adenocarcinoma nos  
 21 [m]mucinous adenoma and adenocarcinoma  
 22 [m]mucinous adenoma or adenocarcinoma nos  
 23 [m]myoma and myosarcoma  
 24 [m]myoma or myosarcoma nos  
 25 [m]neoplasms nos  
 26 nerve sheath tumor  
 27 odontogenic tumor  
 28 [m]oxyphilic adenoma or adenocarcinoma nos  
 29 [m]oxyphilic adenomas and adenocarcinomas  
 30 [m]papillary adenoma or adenocarcinoma nos  
 31 [m]papillary adenomas and adenocarcinomas  
 32 [m]sebaceous adenoma and adenocarcinoma  
 33 [m]sebaceous adenoma or adenocarcinoma nos  
 34 serous surface papillary tumor of borderline malignancy  
 35 specialized gonadal neoplasm  
 36 sweat gland tumor  
 37 [m]tubular adenoma or adenocarcinoma nos  
 38 [m]tubular adenomas and adenocarcinomas  
 39 [m]urothelial carcinoma  
 40 [m]villous adenoma or adenocarcinoma nos  
 41 [m]villous adenomas and adenocarcinomas  
 42 [x]mal neoplasm/overlap les/periph nerv+autonomic nerv system  
 43 [x]malignant neoplasm of breast  
 44 [x]malignant neoplasm of bronchus or lung, unspecified  
 45 malignant tumor of male genital organ  
 46 malignant tumor of mediastinum  
 47 [x]malignant neoplasm-pluriglandular involvement,unspecified  
 48 [x]malignant neoplasm/bones+articular cartilage/limb,unspfd  
 49 [x]malignant neoplasm/overlap lesion/bone+articulr cartilage  
 50 [x]malignant neoplasm/overlapping lesion/male genital organs

1 liver cell carcinoma  
2 carcinoma in situ of lip, oral cavity and pharynx  
3 carcinoma of rectum  
4 melanoma in situ of scalp and neck  
5 malignant neoplasm of ventral tongue surface nos  
6 malignant tumor of vulva  
7 malignant neoplasm, overlap lesion of resp & intrathor orgs  
8 malignant neoplasm of trunk nos  
9 malignant tumor of small intestine  
10 malignant neoplasm of stomach nos  
11 malignant neoplasm of supraclavicular fossa nos  
12 malignant neoplasm of prepylorus of stomach  
13 malignant neoplasm of posterior wall of stomach nec  
14 malignant neoplasm of lip unspecified, inner aspect  
15 malignant neoplasm of lip, unspecified, lipstick area  
16 malignant tumor of head and neck  
17 malignant neoplasm of inguinal region nos  
18 malignant neoplasm of jaw nos  
19 neoplasm of urinary system  
20 malignant neoplasm of flank nos  
21 malignant neoplasm of chest wall nos  
22 malignant neoplasm of back nos  
23 malignant neoplasm of bone and articular cartilage nos  
24 malignant tumor of lung  
25 malignant neoplasm of anterior wall of stomach nec  
26 malig neop of connective and soft tissue trunk unspecified  
27 hyperparathyroid bone disease  
28 primary malignant neoplasm of descended testis  
29 acinar cell tumor  
30 blood vessel tumor  
31 giant cell tumor of bone  
32 hemangioendothelioma  
33 mesonephric tumor  
34 specialized gonadal neoplasm  
35 sweat gland tumor  
36 human immunodeficiency virus with secondary cancers  
37 intestinal metaplasia of gastric mucosa  
38 surface epithelial-stromal tumour  
39 malignant neoplasm of eye  
40 malignant neoplasm of adrenal cortex  
41 malignant neoplasm of adrenal medulla  
42 malignant neoplasm of body of uterus  
43 malignant neoplasm of clitoris  
44 malignant neoplasm of female breast  
45 cervical cancer screening offered  
46 cervical cancer screening not offered  
47 secondary malignant neoplasm of retroperitoneum  
48 malignant neoplasm, overlapping lesion of oesophagus  
49 [m]hilar cell tumour  
50 [m]juxtglomerular tumour



1 [m]squamous cell carcinoma, keratinising type nos  
2 ca upper third oesophagus  
3 ca middle third oesophagus  
4 ca lower third oesophagus  
5 tumour nos  
6 [m]papillary cystic tumour  
7 [m]carotid body tumour  
8 [m]mucocarcinoid tumour, malignant  
9 [m]glomus jugulare tumour  
10 [m]mixed germ cell tumour  
11 [m]triton tumour, malignant  
12 malignant neoplasm of caecum  
13 oesophageal cancer  
14 malignant neoplasm of oesophagus  
15 [m]primitive neuroectodermal tumour  
16 [m]rathke's pouch tumour  
17 [m]carcinoid tumour, argentaffin, malignant  
18 [m]aortic body tumour  
19 [m]epithelioid haemangioendothelioma, malignant  
20 [m]sclerosing stromal tumour  
21 [m]klatskin's tumour  
22 [m]haemangioendothelioma  
23 [m]blue naevus, malignant  
24 [m]sex cord tumour with annular tubules  
25 [m]placental site trophoblastic tumour  
26 [m]juvenile granulosa cell tumour  
27 [m]adenocarcinoid tumour  
28 carcinoma in situ of lower 1/3 oesophagus  
29 carcinoma in situ of middle 1/3 oesophagus  
30 carcinoma in situ of upper 1/3 oesophagus  
31 malignant neoplasm, overlapping lesion of hypopharynx  
32 malignant neoplasm, overlapping lesion of eye and adnexa  
33 neuroendocrine tumor  
34 neuroendocrine tumour  
35 malignant neoplasm, overlapping lesion of nasopharynx  
36 malignant neoplasm, overlapping lesion of larynx  
37 malignant overlapping lesion of tongue  
38 malignant neoplasm, overlapping lesion of floor of mouth  
39 malignant neoplasm, overlapping lesion of stomach  
40 malignant neoplasm, overlapping lesion of small intestine  
41 malignant neoplasm, overlapping lesion of biliary tract  
42 malignant neoplasm, overlapping lesion of pancreas  
43 malignant neoplasm, overlapping lesion of penis  
44 [m]bronchiolo-alveolar adenocarcinoma  
45 [m]pseudomyxoma peritonei  
46 malignant mixed mesodermal tumor  
47 malignant mixed mesodermal tumour  
48 [m]neurofibromas  
49 [m]mesoblastic nephroma  
50 metastatic colorectal cancer

1 [m]serous cystadenoma, borderline malignancy  
2 [m]papillary cystadenoma, borderline malignancy  
3 [m]papillary serous cystadenoma, borderline malignancy  
4 malignant neuroleptic syndrome  
5 [m]hepatocellular carcinoma, fibrolamellar  
6 [m]subependymal giant cell astrocytoma  
7 [m]myxoid leiomyosarcoma  
8 [m]acral lentiginous melanoma, malignant  
9 [m]carcinoma in pleomorphic adenoma  
10 [m]queyrat's erythroplasia  
11 ca cardia - stomach  
12 ca pylorus - stomach  
13 ca fundus - stomach  
14 ca body - stomach  
15 ca larynx - supraglottis  
16 ca ribs/sternum/clavicle  
17 [m]invasive hydatidiform mole  
18 [m]chorioadenoma  
19 [m]chorioadenoma destruens  
20 ca ovary/other uterine adnexa  
21 [m]follicular carcinoma  
22 malignant pleural mesothelioma  
23 [m]teratoma, malignant, nos  
24 [m]small cell-large cell carcinoma  
25 [m]osteosarcoma nos  
26 [m]hepatocellular carcinoma nos  
27 [m]myxosarcoma  
28 [m]adenofibroma nos  
29 multiple endocrine neoplasia syndrome type 1  
30 [m]vipoma  
31 [m]nephroblastoma nos  
32 [m]adenosarcoma  
33 [v]prophylactic antibiotic  
34 [m]basal cell adenocarcinoma  
35 [m]infiltrating duct and lobular carcinoma  
36 [m]granulocytic sarcoma  
37 [m]haemangiopericytoma nos  
38 malignant neoplasm of cervix uteri  
39 malignant neoplasm of upper lip, vermilion border  
40 malignant neoplasm of lower lip, lipstick area  
41 malignant neoplasm of posterior third of tongue  
42 malignant neoplasm of major salivary glands  
43 malignant neoplasm of submandibular gland  
44 malignant neoplasm of roof of mouth  
45 malignant neoplasm of palatine tonsil  
46 malignant neoplasm of faucial tonsil  
47 malignant neoplasm of roof of nasopharynx  
48 ca hepatic flexure - colon  
49 ca transverse colon  
50 ca descending colon

1 ca sigmoid colon  
2  
3 ca ascending colon  
4 ca splenic flexure - colon  
5 ca rectosigmoid junction  
6 malignant neoplasm of retroperitoneum  
7 malignant neoplasm of nasal cavities  
8 malignant neoplasm of ethmoid sinus  
9 ca larynx - subglottis  
10 malignant neoplasm of soft tissue of head  
11 malignant neoplasm of soft tissue of face  
12 malignant neoplasm of soft tissue of neck  
13 cancer of ovary  
14 malignant neoplasm of prepuce (foreskin)  
15 [m]linitis plastica  
16 [m]lipid-rich carcinoma  
17 [m]astrocytoma nos  
18 [m]intraepidermal epithelioma of jadassohn  
19 [m]malignant melanoma, regressing  
20 [m]craniopharyngioma  
21 [m]pulmonary blastoma  
22 [m]malignant melanoma in hutchinson's melanotic freckle  
23 [m]mesenchymomas  
24 [m]chorioepithelioma  
25 [m]choriocarcinoma  
26 [m]subependymoma  
27 [m]adenocarcinoma in multiple adenomatous polyps  
28 [m]adenocarcinoma in situ in villous adenoma  
29 [m]kaposi's sarcoma  
30 [m]merkel cell carcinoma  
31 [m]adenocarcinoma in situ in tubulovillous adenoma  
32 [m]desmoplastic melanoma, malignant  
33 [m]combined hepatocellular carcinoma and cholangiocarcinoma  
34 [m]pancreatoblastoma  
35 [m]fibrosarcoma nos  
36 [m]paget's disease and intraductal carcinoma of breast  
37 [m]sebaceous adenocarcinoma  
38 [m] t-gamma lymphoproliferative disease  
39 [m]osteoblastoma  
40 [m]neuroendocrine carcinoma  
41 [m]adenocarcinoma in tubulovillous adenoma  
42 [m]angiomyxoma  
43 [m]trichoepithelioma  
44 [m]squamous cell carcinoma in situ nos  
45 [m]small cell carcinoma, intermediate cell  
46 [m]adenocarcinoma in situ in adenomatous polyp  
47 [m]hutchinson's melanotic freckle  
48 [m]pigmented dermatofibrosarcoma protuberans  
49 falciparum malaria - malignant  
50 [m]synovioma nos  
51 [m]synovial sarcoma nos  
52  
53  
54  
55  
56  
57  
58  
59  
60

1 [m]lipoblastomatosis  
2 [m]intraductal papillary adenocarcinoma with invasion  
3 [m]mucinous cystadenoma nos  
4 [m]dedifferentiated liposarcoma  
5 [m]carcinomatosis  
6 [m]neurinomatosi  
7 [m]gangliocytic paraganglioma  
8 [m]glycogen-rich carcinoma  
9 [m]apudoma  
10 [m]dermatofibroma protuberans  
11 polyneuropathy in malignant disease  
12 [m]melanoma in situ  
13 [m]pleomorphic xanthoastrocytoma  
14 [m]von recklinghausen's disease  
15 [m]neurofibromatosis nos  
16 [m]multiple neurofibromatosis  
17 [m]rhabdoid sarcoma  
18 [m]chondromatosis nos  
19 [m]phaeochromocytoma nos  
20 [m]cystic mesothelioma  
21 [m]giant cell sarcoma (except of bone)  
22 [m]juvenila melanoma  
23 [m]alveolar soft part sarcoma  
24 carcinoma in situ of skin of forehead skin  
25 malignant melanoma of external surface of cheek  
26 malignant melanoma of eyebrow  
27 malignant melanoma of external surface of nose  
28 secondary malignant neoplasm of peritoneum  
29 ca liver - primary  
30 [m]epithelial-myoepithelial carcinoma  
31 osteoma  
32 teratoma of descended testis  
33 [m]basal cell neoplasms  
34 [m]ependymoma nos  
35 [m]papillary neoplasms  
36 [m]seminomas  
37 malignant tumor of female genital organ  
38 cervical smear - severe dyskaryosis ? invasive carcinoma  
39 cervical smear - ? glandular neoplasia  
40 sternomastoid tumour  
41 secondary and unspec malig neop of superficial parotid In  
42 secondary and unspec malig neop superfic tracheobronchial In  
43 [m]subependymal astrocytoma nos  
44 [m]wilms' tumour  
45 carcinoma in situ of urinary tract proper  
46 primary malignant neoplasm of skin  
47 malignant tumour of posterior margin of nasal septum and choanae  
48 malignant neoplasm skin of other and unspecified parts face  
49 malignant tumour of upper labial mucosa  
50 primary malignant neoplasm of intrahepatic bile ducts

1 malignant neoplasm of long bones of leg  
2 [m]carcinoma, metastatic, nos  
3 malignant neoplasm of skin of trunk, excluding scrotum  
4 malignant neoplasm of ovary and other uterine adnexa  
5 secondary and unspecified malignant neoplasm of lymph nodes of head, face and neck  
6 malignant neoplasm of lip, oral cavity and pharynx nos  
7 malignant neoplasm of lesser curve of stomach unspecified  
8 malignant neoplasm of greater curve of stomach unspecified  
9 secondary and unspecified malignant neoplasm of intrathoracic lymph nodes  
10 secondary and unspecified malignant neoplasm of axilla and upper limb lymph nodes  
11 secondary and unspecified malignant neoplasm of inguinal and lower limb lymph nodes  
12 malignant neoplasm of skin nos  
13 secondary and unspecified malignant neoplasm of intra-abdominal lymph nodes  
14 secondary and unspecified malignant neoplasm of lymph nodes in multiple sites  
15 secondary and unspecified malignant neoplasm of lymph nodes nos  
16 malignant neoplasm of other and unspecified site nos  
17 malignant neoplasm of other and ill-defined sites  
18 secondary malignant neoplasm of other digestive organ  
19 malignant melanoma of skin nos  
20 secondary and unspecified malignant neoplasm of intrapelvic lymph nodes  
21 malignant neoplasm of female breast nos  
22 malignant neoplasm of larynx nos  
23 malignant neoplasm of anus unspecified  
24 malignant neoplasm of rectum, rectosigmoid junction and anus nos  
25 secondary malignant neoplasm of other specified site nos  
26 malignant neoplasm of unspecified site  
27 other malignant neoplasm nos  
28 unspecified nature neoplasm  
29 disseminated malignancy nos  
30 malignant neoplasm of liver and intrahepatic bile ducts nos  
31 neoplasms nos  
32 malignant neoplasm of bone and articular cartilage nos  
33 malignant neoplasm of body of uterus nos  
34 other malignant neoplasm of skin  
35 malignant neoplasm of uterine adnexa nos  
36 malignant neoplasm of kidney or urinary organs nos  
37 malignant neoplasm of penis, part unspecified  
38 malignant neoplasm of genitourinary organ nos  
39 squamous cell carcinoma of skin nos  
40 [m]dermatofibroma protuberans  
41 mesothelioma  
42 malignant tumor of ureter  
43 malignant tumor of thyroid gland  
44 malignant tumor of tonsil  
45 malignant tumor of stomach  
46 malignant tumor of rectum  
47 malignant tumor of head of pancreas  
48 malignant tumor of hepatic flexure  
49 neoplasm of urinary system  
50 malignant tumor of gallbladder

1 malignant tumor of descending colon  
2 malignant tumor of duodenum  
3 malignant tumor of base of tongue  
4 urticaria pigmentosa  
5 anaplasia of cervix  
6 malignant pleural effusion  
7 clark melanoma level 1  
8 excepted from cancer quality indicators: patient unsuitable  
9 excepted from cancer quality indicators: informed dissent  
10 bowen's disease  
11 human immunodeficiency virus infection  
12 neuroblastoma  
13 severe vaginal dysplasia, not elsewhere classified  
14 severe vulvar dysplasia, not elsewhere classified  
15 tumour marker monitoring  
16 endoscopic removal of bladder lesion  
17 paraneoplastic antibody level  
18 administration of cancer treatment  
19 gleason prostate grade 5-7 (medium)  
20 squamous cell carcinoma antigen level  
21 cancer treatment started  
22 cancer diagnosis discussed  
23 cancer care plan  
24 cancer confirmed  
25 cancer primary healthcare multidisciplinary team  
26 cancer diagnosis discussed with significant other  
27 cancer diagnosis discussed with patient  
28 cancer care plan discussed with patient  
29 cancer care plan discussed with significant other  
30 turbt - transurethral resection of bladder tumour  
31 ca extrahepatic bile ducts  
32 gleason prostate grade 2-4 (low)  
33 gleason prostate grade 8-10 (high)  
34 ca larynx - glottis  
35 ca pelvic bones/sacrum/coccyx  
36 secondary malig neop of large intestine or rectum nos  
37 secondary malig neop of respiratory and digestive systems  
38 secondary malig neop of respiratory or digestive system nos  
39 secondary malig neop of retroperitoneum and peritoneum  
40 secondary malig neop of retroperitoneum or peritoneum nos  
41 secondary malig neop of small intestine or duodenum nos  
42 secondary malignant neoplasm of large intestine and rectum  
43 secondary malignant neoplasm of liver  
44 secondary malignant neoplasm of other specified site nos  
45 secondary malignant neoplasm of other specified sites  
46 secondary malignant neoplasm of small intestine and duodenum  
47 secondary unspec malig neop lymph nodes head/face/neck nos  
48 carcinoma in situ of adrenal gland  
49 carcinoma in situ of ampulla of vater  
50 carcinoma in situ of anal canal

1 carcinoma in situ of appendix  
2 carcinoma in situ of ascending colon  
3 carcinoma in situ of bladder  
4 carcinoma in situ of body of stomach  
5 carcinoma in situ of body of uterus  
6 carcinoma in situ of cardia of stomach  
7 carcinoma in situ of cervix uteri  
8 carcinoma in situ of colon  
9 carcinoma in situ of common bile duct  
10 carcinoma in situ of cystic duct  
11 carcinoma in situ of descending colon  
12 carcinoma in situ of duodenum  
13 carcinoma in situ of endocervix  
14 carcinoma in situ of endometrium  
15 carcinoma in situ of epididymis  
16 carcinoma in situ of epiglottis  
17 carcinoma in situ of ethmoidal sinus  
18 carcinoma in situ of eustachian tube  
19 carcinoma in situ of exocervix  
20 carcinoma in situ of eye  
21 carcinoma in situ of fallopian tube  
22 carcinoma in situ of floor of mouth  
23 carcinoma in situ of frontal sinus  
24 carcinoma in situ of fundus of stomach  
25 carcinoma in situ of glottis  
26 carcinoma in situ of hepatic flexure of colon  
27 carcinoma in situ of hypopharynx  
28 carcinoma in situ of ileum  
29 carcinoma in situ of intrahepatic bile ducts  
30 carcinoma in situ of jejunum  
31 carcinoma in situ of larynx  
32 carcinoma in situ of lip  
33 carcinoma in situ of liver  
34 carcinoma in situ of main bronchus  
35 carcinoma in situ of mastoid air cells  
36 carcinoma in situ of maxillary sinus  
37 carcinoma in situ of meckel's diverticulum  
38 carcinoma in situ of nasal cavity  
39 carcinoma in situ of nasopharynx  
40 carcinoma in situ of oropharynx  
41 carcinoma in situ of ovary  
42 carcinoma in situ of palate  
43 carcinoma in situ of pancreas  
44 carcinoma in situ of parathyroid gland  
45 carcinoma in situ of penis  
46 carcinoma in situ of perianal skin  
47 carcinoma in situ of pharynx  
48 carcinoma in situ of pituitary gland  
49 carcinoma in situ of pleura  
50 carcinoma in situ of prostate

1 carcinoma in situ of pyloric antrum  
2 carcinoma in situ of rectosigmoid junction  
3 carcinoma in situ of rectum  
4 carcinoma in situ of scrotum  
5 carcinoma in situ of sigmoid colon  
6 carcinoma in situ of skin of axilla  
7 carcinoma in situ of skin of back  
8 carcinoma in situ of skin of breast  
9 carcinoma in situ of skin of buttock  
10 carcinoma in situ of skin of cheek  
11 carcinoma in situ of skin of eyebrow  
12 carcinoma in situ of skin of foot  
13 carcinoma in situ of skin of groin  
14 carcinoma in situ of skin of hand  
15 carcinoma in situ of skin of hip  
16 carcinoma in situ of skin of knee  
17 carcinoma in situ of skin of lip  
18 carcinoma in situ of skin of neck  
19 carcinoma in situ of skin of nose  
20 carcinoma in situ of skin of perineum  
21 carcinoma in situ of skin of shoulder  
22 carcinoma in situ of skin of thigh  
23 carcinoma in situ of skin  
24 carcinoma in situ of sphenoidal sinus  
25 carcinoma in situ of spleen  
26 carcinoma in situ of stomach  
27 carcinoma in situ of testis  
28 carcinoma in situ of thyroid gland  
29 carcinoma in situ of tongue  
30 carcinoma in situ of trachea  
31 carcinoma in situ of transverse colon  
32 carcinoma in situ of vagina  
33 carcinoma in situ of vulva  
34 malignant melanoma of perianal skin  
35 malignant melanoma of skin  
36 malignant neoplasm of acromion  
37 malignant neoplasm of adrenal gland  
38 malignant neoplasm of anal canal  
39 malignant neoplasm of anterior mediastinum  
40 malignant neoplasm of aortic body  
41 malignant neoplasm of areola of female breast  
42 malignant neoplasm of areola of male breast  
43 malignant neoplasm of broad ligament  
44 malignant neoplasm of carotid body  
45 malignant neoplasm of cerebellum  
46 malignant neoplasm of clavicle  
47 malignant neoplasm of coccygeal body  
48 malignant neoplasm of cuboid  
49 malignant neoplasm of cystic duct  
50 malignant neoplasm of diaphragm  
51  
52  
53  
54  
55  
56  
57  
58  
59  
60



1 malignant neoplasm of dorsal surface of tongue  
2 malignant neoplasm of endocervix  
3 malignant neoplasm of epicardium  
4 malignant neoplasm of ethmoid bone  
5 malignant neoplasm of exocervix  
6 malignant neoplasm of femur  
7 malignant neoplasm of fibula  
8 malignant neoplasm of frontal bone  
9 malignant neoplasm of glomus jugulare  
10 malignant neoplasm of great vessels  
11 malignant neoplasm of hilus of lung  
12 malignant neoplasm of ilium  
13 malignant neoplasm of intrahepatic bile ducts  
14 malignant neoplasm of ischium  
15 malignant neoplasm of lateral wall of oropharynx  
16 malignant neoplasm of main bronchus  
17 malignant neoplasm of male breast  
18 malignant neoplasm of mandible  
19 malignant neoplasm of maxilla  
20 malignant neoplasm of nasal bone  
21 malignant neoplasm of nipple of female breast  
22 malignant neoplasm of nipple of male breast  
23 malignant neoplasm of occipital bone  
24 malignant neoplasm of optic nerve  
25 malignant neoplasm of parametrium  
26 malignant neoplasm of parietal bone  
27 malignant neoplasm of parietal peritoneum  
28 malignant neoplasm of parietal pleura  
29 malignant neoplasm of patella  
30 malignant neoplasm of pelvic peritoneum  
31 malignant neoplasm of periadrenal tissue  
32 malignant neoplasm of perianal skin  
33 malignant neoplasm of pericardium  
34 malignant neoplasm of placenta  
35 malignant neoplasm of posterior mediastinum  
36 malignant neoplasm of presacral region  
37 malignant neoplasm of pubis  
38 malignant neoplasm of radius  
39 malignant neoplasm of rectum  
40 malignant neoplasm of rib  
41 malignant neoplasm of sacrococcygeal region  
42 malignant neoplasm of scapula  
43 malignant neoplasm of skin of ankle  
44 malignant neoplasm of skin of back  
45 malignant neoplasm of skin of breast  
46 malignant neoplasm of skin of buttock  
47 malignant neoplasm of skin of chin  
48 malignant neoplasm of skin of eyebrow  
49 malignant neoplasm of skin of finger  
50 malignant neoplasm of skin of foot

1 malignant neoplasm of skin of forehead  
2 malignant neoplasm of skin of groin  
3 malignant neoplasm of skin of hand  
4 malignant neoplasm of skin of hip  
5 malignant neoplasm of skin of knee  
6 malignant neoplasm of skin of lip  
7 malignant neoplasm of skin of neck  
8 malignant neoplasm of skin of perineum  
9 malignant neoplasm of skin of shoulder  
10 malignant neoplasm of skin of thigh  
11 malignant neoplasm of skin of toe  
12 malignant neoplasm of skin of umbilicus  
13 malignant neoplasm of sphenoid bone  
14 malignant neoplasm of sternum  
15 malignant neoplasm of talus  
16 malignant neoplasm of temporal bone  
17 malignant neoplasm of tibia  
18 malignant neoplasm of ulna  
19 malignant neoplasm of ventral surface of tongue  
20 malignant neoplasm of visceral pleura  
21 malignant neoplasm of vomer  
22 malignant neoplasm of zygomatic bone  
23 secondary malignant neoplasm of adrenal gland  
24 secondary malignant neoplasm of bladder  
25 secondary malignant neoplasm of brain  
26 secondary malignant neoplasm of colon  
27 secondary malignant neoplasm of duodenum  
28 secondary malignant neoplasm of ileum  
29 under care cancer primary healthcare multidisciplinary team  
30 secondary malignant neoplasm of jejunum  
31 secondary malignant neoplasm of kidney  
32 secondary malignant neoplasm of liver  
33 secondary malignant neoplasm of lung  
34 secondary malignant neoplasm of mediastinum  
35 secondary malignant neoplasm of ovary  
36 secondary malignant neoplasm of penis  
37 secondary malignant neoplasm of pleura  
38 secondary malignant neoplasm of prostate  
39 secondary malignant neoplasm of rectum  
40 secondary malignant neoplasm of skin of breast  
41 secondary malignant neoplasm of skin of face  
42 secondary malignant neoplasm of skin of neck  
43 secondary malignant neoplasm of skin of trunk  
44 secondary malignant neoplasm of skin  
45 secondary malignant neoplasm of spinal cord  
46 secondary malignant neoplasm of testis  
47 secondary malignant neoplasm of tongue  
48 secondary malignant neoplasm of ureter  
49 secondary malignant neoplasm of urethra  
50 secondary malignant neoplasm of uterus  
51  
52  
53  
54  
55  
56  
57  
58  
59  
60

1 secondary malignant neoplasm of vagina  
2 secondary malignant neoplasm of vulva  
3 secondary and unspec malig neop ant mediastinal lymph nodes  
4 secondary and unspec malig neop anterior cervical ln  
5 secondary and unspec malig neop axilla and upper limb ln  
6 secondary and unspec malig neop axilla and upper limb ln nos  
7 secondary and unspec malig neop axillary lymph nodes  
8 secondary and unspec malig neop bronchopulmonary lymph nodes  
9 secondary and unspec malig neop circumflex iliac ln  
10 secondary and unspec malig neop coeliac lymph nodes  
11 secondary and unspec malig neop common iliac lymph nodes  
12 secondary and unspec malig neop deep cervical ln  
13 secondary and unspec malig neop deep inguinal lymph nodes  
14 secondary and unspec malig neop deep parotid lymph nodes  
15 secondary and unspec malig neop diaphragmatic lymph nodes  
16 secondary and unspec malig neop external iliac lymph nodes  
17 secondary and unspec malig neop inferior epigastric ln  
18 secondary and unspec malig neop inferior mesenteric ln  
19 secondary and unspec malig neop inferior tracheobronchial ln  
20 secondary and unspec malig neop infraclavicular lymph nodes  
21 tele. reminder for cervical neoplasia screen  
22 secondary and unspec malig neop inguinal and lower limb ln  
23 verbal reminder for cervical neoplasia screen  
24 verbal reminder for cervical neoplasia screen  
25 secondary and unspec malig neop intercostal lymph nodes  
26 secondary and unspec malig neop internal iliac lymph nodes  
27 secondary and unspec malig neop internal mammary lymph nodes  
28 secondary and unspec malig neop intra-abdominal ln nos  
29 secondary and unspec malig neop intra-abdominal lymph nodes  
30 secondary and unspec malig neop intrapelvic ln nos  
31 secondary and unspec malig neop intrapelvic lymph nodes  
32 primary malignant neoplasm of liver  
33 secondary and unspec malig neop intrathoracic ln nos  
34 secondary and unspec malig neop intrathoracic lymph nodes  
35 secondary and unspec malig neop lymph nodes head/face/neck  
36 secondary and unspec malig neop lymph nodes multiple sites  
37 secondary and unspec malig neop lymph nodes nos  
38 secondary and unspec malig neop of facial lymph nodes  
39 secondary and unspec malig neop of inguinal and leg ln nos  
40 secondary and unspec malig neop of superficial parotid ln  
41 secondary and unspec malig neop paratracheal lymph nodes  
42 secondary and unspec malig neop pectoral lymph nodes  
43 secondary and unspec malig neop post mediastinal lymph nodes  
44 secondary and unspec malig neop pulmonary lymph nodes  
45 secondary and unspec malig neop sacral lymph nodes  
46 secondary and unspec malig neop submandibular lymph nodes  
47 secondary and unspec malig neop submental lymph nodes  
48 secondary and unspec malig neop superfic tracheobronchial ln  
49 secondary and unspec malig neop superficial cervical ln  
50 secondary and unspec malig neop superficial inguinal ln

1 secondary and unspec malig neop superficial mesenteric ln  
2 secondary and unspec malig neop supratrochlear lymph nodes  
3 secondary and unspec malignant neoplasm mastoid lymph nodes  
4 secondary and unspec malignant neoplasm occipital lymph node  
5 exception reporting: cancer quality indicators  
6 did not attend bowel cancer screening  
7 bowel cancer screening declined  
8 bowel cancer screening - positive fobs  
9 bowel cancer screening - negative fobs  
10 multiple self-healing epithelioma of ferguson-smith  
11 advice given about prostate cancer screening  
12 ovarian neoplasm screening  
13 not eligible for bowel cancer screening programme  
14 cancer multidisciplinary team report  
15 malignant melanoma of the ciliary body  
16 malignant melanoma of choroid  
17 malignant melanoma of iris  
18 has cancer key worker  
19 breslow depth staging for melanoma  
20 immunodeficiency with thymoma  
21 hereditary nonpolyposis colon cancer  
22 overlapping malignant melanoma of skin  
23 melanoma in situ of lip  
24 melanoma in situ of eyelid, including canthus  
25 melanoma in situ of scalp  
26 melanoma in situ of trunk  
27 mesothelioma of pericardium  
28 kaposi's sarcoma of skin  
29 kaposi's sarcoma of palate  
30 kaposi's sarcoma of lymph nodes  
31 malignant neoplasm of cloacogenic zone  
32 mesothelioma of peritoneum  
33 malignant neoplasm of descended testis  
34 lobular carcinoma in situ of breast  
35 intraductal carcinoma in situ of breast  
36 ovarian neoplasm screening  
37 epithelioid trophoblastic tumour  
38 grade 1 (stage pta) papillary urothelial/transitional cell carcinoma  
39 grade 2 (stage pta) papillary urothelial/transitional cell carcinoma  
40 grade 3 (stage pta) papillary urothelial/transitional cell carcinoma  
41 glioma  
42 [shhapt] lymphogranuloma venereum  
43 [shhapt] lymphogranuloma venereum - rectal infection  
44 [shhapt] lymphogranuloma venereum - pharyngeal infection  
45 vaginal intraepithelial neoplasia grade 3  
46 [m]superficial basal cell carcinoma  
47 [m]basal cell carcinoma, nodular  
48 [m]basal cell carcinoma, micronodular  
49 renal malignant neoplasm  
50 [m]basal cell carcinoma, infiltrative

1 [m]pigmented basal cell carcinoma  
2 carcinoid tumour of lung  
3 thymoma  
4 renal tubulo-interstitial disorder/ neoplastic diseases  
5 primary malignant neoplasm of lung  
6 small cell lung cancer  
7 non-small cell lung cancer  
8 squamous cell carcinoma of lung  
9 adenocarcinoma of lung  
10 large cell carcinoma of lung  
11 tumour stage finding  
12 tumour stage t1a  
13 tumour stage t1b  
14 tumour stage t2a  
15 tumour stage t2b  
16 tumour stage t3a  
17 tumour stage t3b  
18 tumour stage t4  
19 referred to cancer service  
20 staff group: nursing - cancer related  
21 cancer supportive care worker  
22 cancer care review  
23 anal intraepithelial neoplasia grade ii  
24 anal intraepithelial neoplasia grade i  
25 [m]sarcomatoid mesothelioma  
26 malignant neoplasm of urinary bladder  
27 anal intraepithelial neoplasia grade iii  
28 local recurrence of malignant tumour of urinary bladder  
29 local recurrence of malignant tumour of breast  
30 prostatic intraepithelial neoplasia  
31 malignant neoplasm of skin  
32 hiv disease resulting in kaposi sarcoma  
33 secondary malignant neoplasm of liver intrahepatic bile duct  
34 sarcoma of dendritic cells  
35 primary cutaneous cd30-positive t-cell proliferations  
36 bowel cancer screening programme invitation letter sent  
37 bowel cancer screening programme telephone invite  
38 cancer follow up - enhanced services administration  
39 breast cancer follow up - enhanced services administration  
40 prostate cancer follow up - enhanced services administration  
41 discharge from cancer primary healthcare mdt  
42 wilms' tumour + nephrotic syndrome + pseudohermaphroditism  
43 wells dvt score - active cancer  
44 wells pe score - malignancy  
45 prov of written info about bowel cancer screening programme  
46 [m]non-small cell carcinoma  
47 [m]peripheral neuroectodermal tumour  
48 cancer and/or significant invasive tumors  
49 crv smr - hi grade dyskaryosis? invasive squamous carcinoma  
50 cervical smear - ?endocervical type glandular neoplasia

1  
2 cervical smear - ?non-cervical type glandular neoplasia  
3 [m]neuroendocrine neoplasm  
4 rectal neoplasm screen  
5 stewart-treves syndrome  
6 delayed diagnosis of cancer  
7 glomus tumour  
8 [m]metaplastic carcinoma  
9 [m]metaplastic melanoma  
10 [m]porocarcinoma  
11 ajcc tumour staging  
12 warthin's tumour  
13 low-dose ct scan for lung cancer screening offered  
14 carcinoma in situ of caecum  
15 carcinoma in situ of oesophagus  
16 agreement to participate in national cancer registry not known  
17 agreement to participate in national cancer registry not applicable  
18 consent to participate in national cancer registry  
19 dissent to participate in national cancer registry  
20 hypereosinophilic syndrome  
21 [m]neuroendocrine neoplasm  
22 basal cell carcinoma  
23 [m]squamous cell neoplasms  
24 [m]nesidioblastoma  
25 [m]juxtacortical osteosarcoma  
26 [m]insulinoma nos  
27 [m]glucagonoma nos  
28 [m]gastrinoma nos  
29 [m]dermatofibrosarcoma nos  
30 [m]rhabdomyosarcoma nos  
31 [m]complex mixed and stromal neoplasms  
32 [m]osteochondromatosis nos  
33 [m] monoclonal gammopathy  
34 pathological fracture due to metastatic bone disease  
35 osteosarcoma  
36 establishing focus of care with specialist cancer team  
37 insulinoma-associated antigen-2 antibody level  
38 respiratory neoplasm screen  
39 breast neoplasm screen  
40 large bowel neoplasm screen  
41 pleural fluid: malignant cells  
42 bowel cancer screening programme telephone invitation  
43 bowel cancer screening programme invitation letter sent  
44 colon polyp  
45 endocrine tumour of pancreas  
46 queyrats's erythroplasia  
47 other pituitary/adrenal hormones  
48 pharyngeal lymphogranuloma venereum  
49 rectal lymphogranuloma venereum  
50 date cancer diagnosis received in primary care  
51 bowel cancer screening programme bowel scope screening test  
52  
53  
54  
55  
56  
57  
58  
59  
60

1  
2 bowel scope (flexible sigmoidoscopy) screen: cancer detected  
3 persistent omphalomesenteric duct  
4 persistent vitelline duct  
5 cancer hormonal treatment drugs band 1  
6 urine prostate cancer antigen 3 targeted genetic test  
7 malignant melanoma stage ia  
8 malignant melanoma stage ib  
9 malignant melanoma stage iia  
10 malignant melanoma stage iib  
11 malignant melanoma stage iic  
12 malignant melanoma stage iiia  
13 malignant melanoma stage iiib  
14 malignant melanoma stage iiic  
15 malignant melanoma stage iv m1a  
16 malignant melanoma stage iv m1b  
17 malignant melanoma stage iv m1c  
18 prostate cancer care review  
19 active surveillance of prostate cancer  
20 overlapping malign lesion of retroperitoneum and peritoneum  
21 malignant neoplasm of interlobular biliary canals  
22 malignant neoplasm of turbinate  
23 malignant neoplasm of palatoglossal arch  
24 paget's disease-humerus  
25 paget's disease-pelvis  
26 paget's disease-phalanx of finger/thumb  
27 paget's disease-skull  
28 discharge from secondary care cancer service  
29 malignant peripheral nerve sheath tumour with rhabdomyoblastic differentiation  
30 triton tumor, malignant  
31 triton tumour, malignant  
32 malignant schwannoma with rhabdomyoblastic differentiation  
33 mpnst with rhabdomyoblastic differentiation  
34 malignant peripheral nerve sheath tumor with rhabdomyoblastic differentiation  
35 hypercortisolism due to nonpituitary tumour  
36 mucin-producing adenocarcinoma  
37 mucin-producing carcinoma  
38 mucin-secreting adenocarcinoma  
39 mucin-secreting carcinoma  
40 malignant melanoma in junctional naevus  
41 malignant melanoma in junctional nevus  
42 psammomatous schwannoma  
43 plexiform schwannoma  
44 degenerated schwannoma  
45 cellular schwannoma  
46 ancient schwannoma  
47 mixed islet cell and exocrine adenocarcinoma  
48 mixed ductal-endocrine carcinoma  
49 mixed acinar-endocrine carcinoma  
50 basal cell epithelioma  
51 pigmented basal cell carcinoma  
52

1  
2 rodent ulcer  
3 basiloma  
4 bcc - basal cell carcinoma  
5 chromophobe adenocarcinoma  
6 melanotic neuroectodermal tumor  
7 retinal anlage tumor  
8 melanoameloblastoma  
9 melanotic progonoma  
10 retinal anlage tumour  
11 subependymal giant cell astrocytoma  
12 reticulum cell sarcoma, diffuse [obs]  
13 reticulum cell sarcoma [obs]  
14 serous cystadenofibroma  
15 melanoma  
16 mm - malignant melanoma  
17 malignant melanoma, no icd-o subtype  
18 malignant melanoma, no international classification of diseases for oncology subtype  
19 nm - nodular melanoma  
20 cancer hospital treatment completed  
21 cancer emotional and psychosocial support and advice  
22 cancer screening follow up  
23 cancer short term health assessment  
24 cancer rehabilitation and readaption  
25 cancer pain and symptom management  
26 mesonephroma, malignant  
27 mesonephric adenocarcinoma  
28 wolffian duct carcinoma  
29 adrenal cortical tumor, malignant  
30 adrenal cortical adenocarcinoma  
31 adrenal cortical tumour, malignant  
32 papilocystic adenocarcinoma  
33 adenofibroma  
34 papillary adenofibroma  
35 adenofibroma, no icd-o subtype  
36 adenofibroma, no international classification of diseases for oncology subtype  
37 paget's disease, mammary  
38 paget's carcinoma of the nipple  
39 paget disease, mammary  
40 oestrogen receptor positive tumour  
41 oligodendroglioma, anaplastic  
42 cancer shared care medication card  
43 progesterone receptor positive tumour  
44 malignant sacral teratoma  
45 cancer home care pack given  
46 [m]gliomas  
47 [m]glioma nos  
48 invasive mole - placenta  
49 lipid-rich carcinoma  
50 pacinian tumour  
51 krukenberg tumor



1 subependymoma  
2 subependymal astrocytoma  
3 mixed subependymoma-ependymoma  
4 scirrhous adenocarcinoma  
5 scirrhous carcinoma  
6 carcinoma with productive fibrosis  
7 metastatic adenocarcinoma  
8 tubular carcinoma  
9 gastrointestinal stromal tumour  
10 adenocarcinoma in situ in villous adenoma  
11 interstitial cell tumor  
12 interstitial cell tumour  
13 leydig cell tumor, no icd-o subtype  
14 leydig cell tumor  
15 leydig cell tumour  
16 leydig cell tumour, no icd-o subtype  
17 merkel cell carcinoma  
18 merkel cell tumor  
19 primary cutaneous neuroendocrine carcinoma  
20 merkel cell tumour  
21 gp out of hours service notified of cancer care plan  
22 follicular carcinoma  
23 schneiderian carcinoma  
24 cylindrical cell carcinoma  
25 other neoplasm screen nos  
26 adenocarcinoma in tubulovillous adenoma  
27 tubulopapillary adenocarcinoma  
28 papillotubular adenocarcinoma  
29 squamous cell carcinoma in situ with questionable stromal invasion  
30 epidermoid carcinoma in situ with questionable stromal invasion  
31 small cell carcinoma, intermediate cell  
32 neoplasm, malignant, uncertain whether primary or metastatic  
33 unclassified tumor, malignant, uncertain whether primary or metastatic  
34 unclassified tumour, malignant, uncertain whether primary or metastatic  
35 malignant tumor - uncertain whether primary or metastatic  
36 ameloblastic fibrodentinoma  
37 klatskin's tumour  
38 klatskin's tumor  
39 klatskin's tumour morphology  
40 klatskin's tumor morphology  
41 klatskin tumor  
42 increased platelets  
43 metatypical carcinoma  
44 sputum: malignant cells  
45 ascitic fluid: malignant cells  
46 carcinomatosis  
47 resistance to antineoplastic drug  
48 lymphoepithelial carcinoma  
49 lymphoepithelioma  
50 schminke tumor

1 schminke tumour  
2 lymphoepithelioma-like carcinoma  
3 x-ray metastasis control  
4 malignant neoplasm of intrahepatic biliary passages  
5 mixed tumour, malignant  
6 mixed tumor, malignant  
7 mixed tumor, salivary gland type, malignant  
8 mixed tumour, salivary gland type, malignant  
9 malignant chondroid syringoma  
10 malignant mixed tumour  
11 malignant mixed salivary gland tumour  
12 malignant mixed salivary gland tumor  
13 malignant mixed tumor  
14 mixed tumor  
15 mixed tumor, salivary gland type  
16 mixed tumour, salivary gland type  
17 mixed tumour  
18 mixed salivary gland tumour  
19 mixed salivary gland tumor  
20 myxoid fibroma  
21 codman's tumour  
22 chondromatous giant cell tumour  
23 chondroblastoma morphology  
24 squamous odontogenic tumour  
25 spermatocytic seminoma  
26 spermatocytoma  
27 cervical neoplasia screening  
28 epithelial-myoeithelial carcinoma  
29 undifferentiated spindle cell sarcoma  
30 paraganglioma, malignant  
31 monoclonal gammopathy  
32 histiocytic sarcoma  
33 carcinoma in situ  
34 giant cell tumour of bone, malignant  
35 giant cell tumor of bone, malignant  
36 osteoclastoma, malignant  
37 giant cell sarcoma of bone  
38 malignant giant cell tumor of bone  
39 malignant osteoclastoma  
40 squamous cell carcinoma, spindle cell  
41 epidermoid carcinoma, spindle cell  
42 squamous cell carcinoma, sarcomatoid  
43 epidermoid carcinoma - spindle cell  
44 squamous cell carcinoma - spindle cell  
45 giant pigmented nevus  
46 intermediate and giant congenital nevus  
47 intermediate and giant congenital naevus  
48 congenital giant pigmented naevus  
49 congenital giant pigmented nevus  
50 mucinous adenofibroma

1 mucinous cystadenofibroma  
2 mixed liposarcoma  
3 mixed-type liposarcoma  
4 hilus cell tumour  
5 hilar cell tumour  
6 adenocarcinoma, cylindroid  
7 adenocystic carcinoma  
8 cylindroma (except cylindroma of skin, m-82000)  
9 mesoblastic nephroma  
10 malignant neoplasm of brain  
11 granular cell tumour  
12 granular cell myoblastoma  
13 round cell osteosarcoma  
14 androblastoma, malignant  
15 arrhenoblastoma, malignant  
16 malignant androblastoma  
17 malignant arrhenoblastoma  
18 retinoblastoma, undifferentiated  
19 retinoblastoma - undifferentiated  
20 papillary urothelial carcinoma  
21 squamous cell carcinoma, microinvasive  
22 clear cell sarcoma (except of kidney m-89643)  
23 clear cell sarcoma, of tendons and aponeuroses  
24 melanoma, malignant, of soft parts  
25 osteofibrosarcoma  
26 reticulohistiocytoma  
27 sweat gland tumour  
28 polar spongioblastoma  
29 spongioblastoma polare  
30 primitive polar spongioblastoma [obs]  
31 mesonephric tumour  
32 wolffian duct tumor  
33 wolffian duct tumour  
34 granular cell tumour, malignant  
35 granular cell tumor, malignant  
36 granular cell myoblastoma, malignant  
37 malignant granular cell tumour  
38 malignant granular cell tumor  
39 malignant granular cell myoblastoma  
40 clark melanoma level 5  
41 mast cell sarcoma  
42 malignant mast cell tumor  
43 malignant mastocytoma  
44 malignant mast cell tumour  
45 glomoid sarcoma  
46 sarcoma botryoides  
47 botryoid sarcoma  
48 embryonal rhabdomyosarcoma, pleomorphic  
49 m6b  
50 aml m6

1  
2 endoscopic destruction of bladder tumour by laser  
3 meningeal sarcomatosis  
4 secondary malignant neoplasm of paratracheal lymph nodes  
5 tumor, metastatic  
6 tumor embolus  
7 neoplasm, secondary  
8 tumor, secondary  
9 tumour, metastatic  
10 tumour embolus  
11 tumour, secondary  
12 chondrosarcoma, no icd-o subtype  
13 chondrosarcoma  
14 fibrochondrosarcoma  
15 chondrosarcoma morphology  
16 chondrosarcoma, no international classification of diseases for oncology subtype  
17 adenoacanthoma  
18 neuroleptic malignant syndrome  
19 nms - neuroleptic malignant syndrome  
20 excision of melanoma  
21 hepatocellular carcinoma, fibrolamellar  
22 primary serous papillary carcinoma of peritoneum  
23 neoplasm screening  
24 thymoma, malignant  
25 reticulohistiocytic granuloma  
26 giant cell histiocytoma  
27 reticulohistiocytoma cutis  
28 myxoid leiomyosarcoma  
29 g cell tumor  
30 gastrin cell tumor  
31 g cell tumour  
32 gastrin cell tumour  
33 acral lentiginous melanoma, malignant  
34 carcinoma ex pleomorphic adenoma  
35 carcinoma in pleomorphic adenoma  
36 squamous cell carcinoma, keratinising  
37 squamous cell carcinoma, keratinizing  
38 squamous cell carcinoma, large cell, keratinizing  
39 epidermoid carcinoma, keratinizing  
40 epidermoid carcinoma, keratinising  
41 squamous cell carcinoma, large cell, keratinising  
42 keratinising squamous cell carcinoma - large cell  
43 keratinising epidermoid carcinoma  
44 keratinizing squamous cell carcinoma - large cell  
45 keratinizing epidermoid carcinoma  
46 endometrioid adenofibroma, malignant  
47 endometrioid cystadenofibroma, malignant  
48 malignant endometrioid cystadenofibroma  
49 malignant endometrioid adenofibroma  
50 extirpation of unspecified organ  
51 debulking of tumour of unspecified organ  
52  
53  
54  
55  
56  
57  
58  
59  
60

1 queyrat's erythroplasia  
2 queyrat erythroplasia  
3 adrenal cortical tumour  
4 malignant melanoma in precancerous melanosis  
5 malignant melanoma in melanosis  
6 synovial sarcoma, biphasic  
7 synovial sarcoma - biphasic  
8 intraductal carcinoma and lobular carcinoma in situ  
9 invasive hydatidiform mole  
10 malignant hydatidiform mole  
11 chorioadenoma destruens  
12 chorioadenoma  
13 invasive mole  
14 struma ovarii, malignant  
15 malignant struma ovarii  
16 granulosa cell tumour, malignant  
17 granulosa cell tumor, malignant  
18 granulosa cell carcinoma  
19 granulosa cell tumor, sarcomatoid  
20 granulosa cell tumour, sarcomatoid  
21 malignant granulosa cell tumor  
22 leiomyoblastoma  
23 fascial fibrosarcoma  
24 immunocytoma  
25 teratoma, malignant  
26 embryonal teratoma  
27 teratoblastoma, malignant  
28 immature teratoma, malignant  
29 malignant teratoblastoma  
30 teratoma, malignant, no icd-o subtype  
31 teratoma, malignant, no international classification of diseases for oncology subtype  
32 gastrinoma, malignant  
33 g cell tumor, malignant  
34 gastrin cell tumor, malignant  
35 g cell tumour, malignant  
36 gastrin cell tumour, malignant  
37 malignant g cell tumour  
38 malignant g cell tumor  
39 retinoblastoma - morphology  
40 squamous intraepithelial neoplasia, high grade  
41 cervical intraepithelial neoplasia, grade iii  
42 vulvar intraepithelial neoplasia, grade iii  
43 vaginal intraepithelial neoplasia, grade iii  
44 vin iii  
45 vain iii  
46 cin iii  
47 cin iii with severe dysplasia  
48 anal intraepithelial neoplasia, grade iii  
49 ain iii  
50 squamous intraepithelial neoplasia, grade iii

1  
2 ameloblastic odontosarcoma  
3 ameloblastic fibro-dentinosarcoma  
4 ameloblastic fibro-odontosarcoma  
5 ameloblastic dentinosarcoma  
6 adamantinoma (except of tibia and long bones, m-92613)  
7 adamantinoma  
8 drug prophylaxis  
9 myosarcoma  
10  
11 warthin's tumour  
12 endometrioid cystadenofibroma  
13 insulinoma, malignant  
14 beta cell tumor, malignant  
15 beta cell tumour, malignant  
16 malignant beta cell tumour  
17 malignant beta cell tumor  
18 combined small cell carcinoma  
19 small cell-large cell carcinoma  
20 mixed small cell carcinoma  
21 combined small cell-squamous cell carcinoma  
22 combined small cell-adenocarcinoma  
23 ependymoblastoma  
24 osteosarcoma  
25 osteochondrosarcoma  
26 osteoblastic sarcoma  
27 osteoblastic osteosarcoma  
28 osteosarcoma, no icd-o subtype  
29 osteosarcoma, no international classification of diseases for oncology subtype  
30 osteosarcoma - morphology  
31 osler's disease  
32 malignant teratoma, intermediate  
33 malignant teratoma - intermediate  
34 microglioma [obs]  
35 adenocarcinoma with apocrine metaplasia  
36 carcinoma with apocrine metaplasia  
37 pseudosarcomatous carcinoma  
38 sarcomatoid carcinoma  
39 human immunodeficiency virus with secondary cancers  
40 human immunodeficiency virus with other clinical findings  
41 acquired human immunodeficiency virus infection syndrome nos  
42 hiv disease resulting in multiple malignant neoplasms  
43 cementoblastoma  
44 arthropod-borne disease nos  
45 5q minus syndrome  
46 lymphogranuloma venereum  
47 mixed acidophil-basophil carcinoma  
48 poisoning by antineoplastic and/or immunosuppressive drug  
49 poisoning caused by antineoplastic and/or immunosuppressive drug  
50 [x]hiv disease resulting in other malignant neoplasms  
51 [x]hiv disease resulting in unspecified malignant neoplasm  
52 malignant neoplasm of upper lip, lipstick area

1 malignant neoplasm of upper lip, vermilion border nos  
2 malignant neoplasm of lower lip, external  
3 malignant neoplasm of lower lip, vermilion border nos  
4 malignant neoplasm of upper lip, oral aspect  
5 malignant neoplasm of upper lip, inner aspect  
6 malignant neoplasm of upper lip, mucosa  
7 malignant neoplasm of upper lip, frenulum  
8 malignant neoplasm of upper lip, inner aspect nos  
9 malignant neoplasm of lower lip, buccal aspect  
10 malignant neoplasm of lower lip, frenulum  
11 malignant neoplasm of lower lip, inner aspect nos  
12 malignant neoplasm of lip unspecified, inner aspect  
13 malignant neoplasm of lip unspecified, frenulum  
14 malignant neoplasm of lip unspecified, mucosa  
15 malignant neoplasm of lip, oral aspect  
16 malignant neoplasm of lip, inner aspect nos  
17 malignant neoplasm of overlapping lesion of lip  
18 malignant neoplasm of other sites of lip  
19 malignant neoplasm of vermilion border of lip unspecified  
20 malignant neoplasm of lip, unspecified, external  
21 malignant neoplasm of lip, unspecified, lipstick area  
22 malignant neoplasm of lip, vermilion border nos  
23 malignant neoplasm of base of tongue dorsal surface  
24 malignant neoplasm of fixed part of tongue nos  
25 malignant neoplasm of anterior 2/3 of tongue dorsal surface  
26 malignant neoplasm of midline of tongue  
27 malignant neoplasm of dorsum of tongue nos  
28 malignant neoplasm of tongue, tip and lateral border  
29 malignant neoplasm of anterior 2/3 of tongue ventral surface  
30 malignant neoplasm of frenulum linguae  
31 malignant neoplasm of ventral tongue surface nos  
32 malignant neoplasm of anterior 2/3 of tongue unspecified  
33 malignant neoplasm of tongue, junctional zone  
34 malignant neoplasm of other sites of tongue  
35 malignant neoplasm of tongue nos  
36 malignant neoplasm of other major salivary glands  
37 malignant neoplasm of major salivary gland nos  
38 malignant neoplasm of other sites of gum  
39 malignant neoplasm of gum nos  
40 malignant neoplasm of anterior portion of floor of mouth  
41 malignant neoplasm of lateral portion of floor of mouth  
42 malignant neoplasm of other sites of floor of mouth  
43 malignant neoplasm of floor of mouth nos  
44 malignant neoplasm of other and unspecified parts of mouth  
45 malignant neoplasm of vestibule of mouth  
46 malignant neoplasm of upper buccal sulcus  
47 malignant neoplasm of lower buccal sulcus  
48 malignant neoplasm of upper labial sulcus  
49 malignant neoplasm of lower labial sulcus  
50 malignant neoplasm of vestibule of mouth nos

1 malignant neoplasm of palate unspecified  
2 malignant neoplasm of junction of hard and soft palate  
3 malignant neoplasm of palate nos  
4 overlapping lesion of other and unspecified parts of mouth  
5 malignant neoplasm of other specified mouth parts  
6 malignant neoplasm of mouth nos  
7 malignant neoplasm tonsil nos  
8 malignant neoplasm of faucial pillar  
9 malignant neoplasm of tonsillar pillar  
10 malignant neoplasm of tonsillar fossa nos  
11 malignant neoplasm of anterior epiglottis  
12 malignant neoplasm of epiglottis, free border  
13 malignant neoplasm of glossoepiglottic fold  
14 malignant neoplasm of anterior epiglottis nos  
15 malignant neoplasm of junctional region of epiglottis  
16 malignant neoplasm of posterior wall of oropharynx  
17 malignant neoplasm of oropharynx, other specified sites  
18 malignant neoplasm of other specified site of oropharynx nos  
19 malignant neoplasm of oropharynx nos  
20 malignant neoplasm of nasopharynx  
21 malignant neoplasm of posterior wall of nasopharynx  
22 malignant neoplasm of pharyngeal tonsil  
23 malignant neoplasm of adenoid  
24 malignant neoplasm of posterior wall of nasopharynx nos  
25 malignant neoplasm of pharyngeal recess  
26 malignant neoplasm of opening of auditory tube  
27 malignant neoplasm of lateral wall of nasopharynx nos  
28 malignant neoplasm of anterior wall of nasopharynx  
29 malignant neoplasm of floor of nasopharynx  
30 malignant neoplasm of nasopharyngeal soft palate surface  
31 malignant neoplasm of anterior wall of nasopharynx nos  
32 malignant neoplasm of other specified site of nasopharynx  
33 malignant neoplasm of nasopharynx nos  
34 malignant neoplasm of posterior pharynx  
35 malignant neoplasm of other specified hypopharyngeal site  
36 malignant neoplasm of hypopharynx nos  
37 malignant neoplasm of pharynx unspecified  
38 malignant neoplasm of waldeyer's ring  
39 malignant neoplasm of lip, oral cavity and pharynx nos  
40 malignant neoplasm of cervical oesophagus  
41 malignant neoplasm of thoracic oesophagus  
42 malignant neoplasm of abdominal oesophagus  
43 malignant neoplasm of upper third of oesophagus  
44 malignant neoplasm of middle third of oesophagus  
45 malignant neoplasm of lower third of oesophagus  
46 malignant neoplasm of other specified part of oesophagus  
47 malignant neoplasm of cardia of stomach  
48 malignant neoplasm of cardiac orifice of stomach  
49 malignant neoplasm of gastro-oesophageal junction  
50 malignant neoplasm of cardio-oesophageal junction of stomach  
51  
52  
53  
54  
55  
56  
57  
58  
59  
60



1 malignant neoplasm of cardia of stomach nos  
2 malignant neoplasm of pylorus of stomach  
3 malignant neoplasm of pyloric canal of stomach  
4 malignant neoplasm of pylorus of stomach nos  
5 malignant neoplasm of pyloric antrum of stomach  
6 malignant neoplasm of fundus of stomach  
7 malignant neoplasm of body of stomach  
8 malignant neoplasm of lesser curve of stomach unspecified  
9 malignant neoplasm of greater curve of stomach unspecified  
10 malignant neoplasm of other specified site of stomach  
11 malignant neoplasm of anterior wall of stomach nec  
12 malignant neoplasm of posterior wall of stomach nec  
13 malignant neoplasm of other specified site of stomach nos  
14 malignant neoplasm of stomach nos  
15 malignant neoplasm of meckel's diverticulum  
16 malignant neoplasm of small intestine nos  
17 malignant neoplasm, overlapping lesion of colon  
18 malignant neoplasm of other specified sites of colon  
19 malignant neoplasm of rectum, rectosigmoid junction and anus  
20 malignant neoplasm of anus unspecified  
21 malignant neoplasm of liver and intrahepatic bile ducts  
22 primary carcinoma of liver  
23 primary malignant neoplasm of liver nos  
24 malignant neoplasm of interlobular bile ducts  
25 malignant neoplasm of intrahepatic canaliculi  
26 malignant neoplasm of intrahepatic gall duct  
27 malignant neoplasm of intrahepatic bile ducts nos  
28 malignant neoplasm of liver unspecified  
29 malignant neoplasm of liver and intrahepatic bile ducts nos  
30 malignant neoplasm of hepatic duct  
31 malignant neoplasm of sphincter of oddi  
32 malignant neoplasm of extrahepatic bile ducts nos  
33 malignant neoplasm of body of pancreas  
34 malignant neoplasm of tail of pancreas  
35 malignant neoplasm of pancreatic duct  
36 malignant neoplasm of other specified sites of pancreas  
37 malignant neoplasm of ectopic pancreatic tissue  
38 malignant neoplasm of specified site of pancreas nos  
39 malignant neoplasm of pancreas nos  
40 malignant neoplasm of retroperitoneum and peritoneum  
41 malignant neoplasm of perinephric tissue  
42 malignant neoplasm of retrocaecal tissue  
43 malignant neoplasm of retroperitoneum nos  
44 malignant neoplasm of specified parts of peritoneum  
45 malignant neoplasm of mesocolon  
46 malignant neoplasm of mesocaecum  
47 malignant neoplasm of mesorectum  
48 malignant neoplasm of the pouch of douglas  
49 malignant neoplasm of specified parts of peritoneum nos  
50 malignant neoplasm of retroperitoneum and peritoneum nos  
51  
52  
53  
54  
55  
56  
57  
58  
59  
60

1 malignant neoplasm of intestinal tract, part unspecified  
2 malignant neoplasm of spleen nec  
3 angiosarcoma of spleen  
4 fibrosarcoma of spleen  
5 malignant neoplasm of spleen nos  
6 malignant neoplasm, overlapping lesion of digestive system  
7 malignant neoplasm of digestive tract and peritoneum nos  
8 malignant neoplasm of cartilage of nose  
9 malignant neoplasm of nasal conchae  
10 malignant neoplasm of vestibule of nose  
11 malignant neoplasm of nasal cavities nos  
12 malignant neoplasm of auditory (eustachian) tube  
13 malignant neoplasm of tympanic cavity  
14 malignant neoplasm of tympanic antrum  
15 malignant neoplasm, overlapping lesion of accessory sinuses  
16 malignant neoplasm of accessory sinus nos  
17 malignant neoplasm of glottis  
18 malignant neoplasm of supraglottis  
19 malignant neoplasm of arytenoid cartilage  
20 malignant neoplasm of cricoid cartilage  
21 malignant neoplasm of cuneiform cartilage  
22 malignant neoplasm of thyroid cartilage  
23 malignant neoplasm of laryngeal cartilage nos  
24 malignant neoplasm of larynx, other specified site  
25 malignant neoplasm of larynx nos  
26 malignant neoplasm of trachea, bronchus and lung  
27 malignant neoplasm of cartilage of trachea  
28 malignant neoplasm of mucosa of trachea  
29 malignant neoplasm of trachea nos  
30 malignant neoplasm of carina of bronchus  
31 malignant neoplasm of main bronchus nos  
32 malignant neoplasm of upper lobe bronchus  
33 malignant neoplasm of upper lobe of lung  
34 malignant neoplasm of upper lobe, bronchus or lung nos  
35 malignant neoplasm of middle lobe, bronchus or lung  
36 malignant neoplasm of middle lobe bronchus  
37 malignant neoplasm of middle lobe of lung  
38 malignant neoplasm of middle lobe, bronchus or lung nos  
39 malignant neoplasm of lower lobe, bronchus or lung  
40 malignant neoplasm of lower lobe bronchus  
41 malignant neoplasm of lower lobe of lung  
42 malignant neoplasm of lower lobe, bronchus or lung nos  
43 malignant neoplasm of other sites of bronchus or lung  
44 malignant neoplasm of other specified pleura  
45 malignant neoplasm of pleura nos  
46 malignant neoplasm of thymus, heart and mediastinum  
47 malignant neoplasm of heart nos  
48 malignant neoplasm of heart, thymus and mediastinum nos  
49 malignant neoplasm of other site of respiratory tract  
50 malignant neoplasm of respiratory tract nos

1 malignant neoplasm of bones of skull and face  
2 malignant neoplasm of malar bone  
3 malignant neoplasm of orbital bone  
4 malignant neoplasm of bones of skull and face nos  
5 malignant neoplasm of cervical vertebra  
6 malignant neoplasm of thoracic vertebra  
7 malignant neoplasm of lumbar vertebra  
8 malignant neoplasm of vertebral column nos  
9 malignant neoplasm of ribs, sternum and clavicle  
10 malignant neoplasm of costal cartilage  
11 malignant neoplasm of xiphoid process  
12 malignant neoplasm of rib, sternum and clavicle nos  
13 malignant neoplasm of scapula and long bones of upper arm  
14 malignant neoplasm of humerus  
15 malignant neoplasm of carpal bone - scaphoid  
16 malignant neoplasm of carpal bone - lunate  
17 malignant neoplasm of carpal bone - triquetrum  
18 malignant neoplasm of carpal bone - pisiform  
19 malignant neoplasm of carpal bone - trapezium  
20 malignant neoplasm of carpal bone - trapezoid  
21 malignant neoplasm of carpal bone - capitate  
22 malignant neoplasm of carpal bone - hamate  
23 malignant neoplasm of first metacarpal bone  
24 malignant neoplasm of second metacarpal bone  
25 malignant neoplasm of third metacarpal bone  
26 malignant neoplasm of fourth metacarpal bone  
27 malignant neoplasm of fifth metacarpal bone  
28 malignant neoplasm of phalanges of hand  
29 malignant neoplasm of hand bones nos  
30 malignant neoplasm of pelvic bones, sacrum and coccyx  
31 malignant neoplasm of sacral vertebra  
32 malignant neoplasm of coccygeal vertebra  
33 malignant neoplasm of pelvis, sacrum or coccyx nos  
34 malignant neoplasm of long bones of leg  
35 malignant neoplasm of long bones of leg nos  
36 malignant neoplasm of calcaneum  
37 malignant neoplasm of medial cuneiform  
38 malignant neoplasm of intermediate cuneiform  
39 malignant neoplasm of lateral cuneiform  
40 malignant neoplasm of navicular  
41 malignant neoplasm of first metatarsal bone  
42 malignant neoplasm of second metatarsal bone  
43 malignant neoplasm of third metatarsal bone  
44 malignant neoplasm of fourth metatarsal bone  
45 malignant neoplasm of fifth metatarsal bone  
46 malignant neoplasm of phalanges of foot  
47 malignant neoplasm of short bones of leg nos  
48 malignant neoplasm of bone and articular cartilage nos  
49 malignant neoplasm of connective and other soft tissue  
50 malignant neoplasm of cartilage of ear

1 malignant neoplasm of tarsus of eyelid  
2 malignant neoplasm soft tissues of cervical spine  
3 malignant neoplasm of connective and soft tissue of shoulder  
4 malignant neoplasm of connective and soft tissue, upper arm  
5 malignant neoplasm of connective and soft tissue of fore-arm  
6 malignant neoplasm of connective and soft tissue of hand  
7 malignant neoplasm of connective and soft tissue of finger  
8 malignant neoplasm of connective and soft tissue of thumb  
9 malignant neoplasm of connective and soft tissue of hip  
10 malignant neoplasm of connective and soft tissue of foot  
11 malignant neoplasm of connective and soft tissue of toe  
12 malignant neoplasm of connective and soft tissue of thorax  
13 malignant neoplasm of connective and soft tissue of axilla  
14 malignant neoplasm of connective and soft tissue of abdomen  
15 malignant neoplasm of connective and soft tissue of pelvis  
16 malignant neoplasm of connective and soft tissue of buttock  
17 malignant neoplasm of connective and soft tissue of perineum  
18 malignant neoplasm of connective and soft tissue, site nos  
19 kaposi's sarcoma of soft tissue  
20 malignant melanoma of lip  
21 malignant melanoma of ear and external auricular canal  
22 malignant melanoma of auricle (ear)  
23 malignant melanoma of external auditory meatus  
24 malignant melanoma of ear and external auricular canal nos  
25 malignant melanoma of other and unspecified parts of face  
26 malignant melanoma of chin  
27 malignant melanoma of forehead  
28 malignant melanoma of temple  
29 malignant melanoma of face nos  
30 malignant melanoma of scalp and neck  
31 malignant melanoma of scalp  
32 malignant melanoma of neck  
33 malignant melanoma of scalp and neck nos  
34 malignant melanoma of trunk (excluding scrotum)  
35 malignant melanoma of axilla  
36 malignant melanoma of breast  
37 malignant melanoma of buttock  
38 malignant melanoma of groin  
39 malignant melanoma of perineum  
40 malignant melanoma of umbilicus  
41 malignant melanoma of trunk, excluding scrotum, nos  
42 malignant melanoma of shoulder  
43 malignant melanoma of upper arm  
44 malignant melanoma of fore-arm  
45 malignant melanoma of hand  
46 malignant melanoma of finger  
47 malignant melanoma of thumb  
48 malignant melanoma of upper limb or shoulder nos  
49 malignant melanoma of lower limb and hip  
50 malignant melanoma of hip

1 malignant melanoma of thigh  
2 malignant melanoma of knee  
3 malignant melanoma of popliteal fossa area  
4 malignant melanoma of lower leg  
5 malignant melanoma of ankle  
6 malignant melanoma of heel  
7 malignant melanoma of foot  
8 malignant melanoma of toe  
9 malignant melanoma of great toe  
10 malignant melanoma of lower limb or hip nos  
11 atypical adenoma  
12 malignant melanoma of other specified skin site  
13 bronchial adenoma  
14 malignant melanoma of skin nos  
15 malignant neoplasm of sebaceous gland  
16 malignant neoplasm of skin of auricle (ear)  
17 malignant neoplasm of skin of external auditory meatus  
18 malignant neoplasm of skin of cheek, external  
19 malignant neoplasm of skin of nose (external)  
20 malignant neoplasm of skin of temple  
21 malignant neoplasm of scalp and skin of neck  
22 malignant neoplasm of scalp  
23 malignant neoplasm of scalp or skin of neck nos  
24 malignant neoplasm of skin of trunk, excluding scrotum  
25 malignant neoplasm of skin of axillary fold  
26 malignant neoplasm of skin of chest, excluding breast  
27 malignant neoplasm of skin of abdominal wall  
28 carcinoma, diffuse type  
29 adenocarcinoma, diffuse type  
30 adenocarcinoma - diffuse type  
31 carcinoma - diffuse type  
32 malignant neoplasm of skin of trunk, excluding scrotum, nos  
33 malignant neoplasm of skin of upper limb and shoulder  
34 malignant neoplasm of skin of upper arm  
35 malignant neoplasm of skin of fore-arm  
36 malignant neoplasm of skin of thumb  
37 malignant neoplasm of skin of upper limb or shoulder nos  
38 malignant neoplasm of skin of lower limb and hip  
39 malignant neoplasm of skin of popliteal fossa area  
40 malignant neoplasm of skin of lower leg  
41 malignant neoplasm of skin of heel  
42 malignant neoplasm of skin of great toe  
43 malignant neoplasm of skin of lower limb or hip nos  
44 malignant neoplasm of other specified skin sites  
45 malignant neoplasm of skin nos  
46 malignant neoplasm of nipple and areola of female breast  
47 malignant neoplasm of nipple or areola of female breast nos  
48 malignant neoplasm of central part of female breast  
49 malignant neoplasm of upper-inner quadrant of female breast  
50 malignant neoplasm of lower-inner quadrant of female breast

1 malignant neoplasm of upper-outer quadrant of female breast  
2 malignant neoplasm of lower-outer quadrant of female breast  
3 malignant neoplasm of axillary tail of female breast  
4 malignant neoplasm, overlapping lesion of breast  
5 malignant neoplasm of other site of female breast  
6 malignant neoplasm of ectopic site of female breast  
7 malignant neoplasm of other site of female breast nos  
8 malignant neoplasm of female breast nos  
9 malignant neoplasm of nipple and areola of male breast  
10 malignant neoplasm of nipple or areola of male breast nos  
11 malignant neoplasm of other site of male breast  
12 malignant neoplasm of ectopic site of male breast  
13 malignant neoplasm of male breast nos  
14 malignant neoplasm of uterus, part unspecified  
15 malignant neoplasm of endocervical canal  
16 malignant neoplasm of endocervical gland  
17 malignant neoplasm of endocervix nos  
18 malignant neoplasm, overlapping lesion of cervix uteri  
19 malignant neoplasm of other site of cervix  
20 malignant neoplasm of cervical stump  
21 malignant neoplasm of squamocolumnar junction of cervix  
22 malignant neoplasm of other site of cervix nos  
23 malignant neoplasm of cervix uteri nos  
24 choriocarcinoma  
25 malignant neoplasm of corpus uteri, excluding isthmus  
26 malignant neoplasm of cornu of corpus uteri  
27 malignant neoplasm of fundus of corpus uteri  
28 malignant neoplasm of endometrium of corpus uteri  
29 malignant neoplasm of myometrium of corpus uteri  
30 malignant neoplasm of corpus uteri nos  
31 malignant neoplasm of isthmus of uterine body  
32 malignant neoplasm of lower uterine segment  
33 malignant neoplasm of isthmus of uterine body nos  
34 malignant neoplasm of overlapping lesion of corpus uteri  
35 malignant neoplasm of other site of uterine body  
36 malignant neoplasm of body of uterus nos  
37 malignant neoplasm of ovary and other uterine adnexa  
38 malignant neoplasm of round ligament  
39 malignant neoplasm of other site of uterine adnexa  
40 malignant neoplasm of uterine adnexa nos  
41 malignant neoplasm of gartner's duct  
42 malignant neoplasm of vaginal vault  
43 malignant neoplasm of vagina nos  
44 malignant neoplasm of greater vestibular (bartholin's) gland  
45 malignant neoplasm of labia majora nos  
46 malignant neoplasm of other specified female genital organ  
47 malignant neoplasm of female genital organ nos  
48 malignant neoplasm of undescended testis  
49 malignant neoplasm of ectopic testis  
50 malignant neoplasm of undescended testis nos

1 malignant neoplasm of penis and other male genital organs  
2 malignant neoplasm of body of penis  
3 malignant neoplasm of penis, part unspecified  
4 malignant neoplasm of other male genital organ  
5 malignant neoplasm of seminal vesicle  
6 malignant neoplasm of tunica vaginalis  
7 malignant neoplasm of other male genital organ nos  
8 malignant neoplasm of penis and other male genital organ nos  
9 malignant neoplasm of trigone of urinary bladder  
10 malignant neoplasm of dome of urinary bladder  
11 malignant neoplasm of lateral wall of urinary bladder  
12 malignant neoplasm of anterior wall of urinary bladder  
13 malignant neoplasm of posterior wall of urinary bladder  
14 malignant neoplasm of bladder neck  
15 medullomyoblastoma  
16 malignant neoplasm of ureteric orifice  
17 malignant neoplasm of other site of urinary bladder  
18 malignant neoplasm, overlapping lesion of bladder  
19 malignant neoplasm of urinary bladder nos  
20 malignant neoplasm of kidney parenchyma  
21 hypernephroma  
22 malignant neoplasm of ureteropelvic junction  
23 malignant neoplasm of renal pelvis nos  
24 malignant neoplasm of other urinary organs  
25 malignant neoplasm of overlapping lesion of urinary organs  
26 malignant neoplasm of kidney or urinary organs nos  
27 malignant neoplasm of genitourinary organ nos  
28 malignant neoplasm of ciliary body  
29 malignant neoplasm of iris  
30 malignant neoplasm of crystalline lens  
31 malignant neoplasm of sclera  
32 malignant neoplasm of eyeball nos  
33 malignant neoplasm of connective tissue of orbit  
34 malignant neoplasm of extraocular muscle of orbit  
35 malignant neoplasm of orbit nos  
36 malignant neoplasm of lacrimal gland  
37 malignant neoplasm of lacrimal sac  
38 malignant neoplasm of nasolacrimal duct  
39 malignant neoplasm of lacrimal duct nos  
40 malignant neoplasm of other specified site of eye  
41 malignant neoplasm of eye nos  
42 malignant neoplasm of basal ganglia  
43 malignant neoplasm of cerebral cortex  
44 malignant neoplasm of corpus striatum  
45 malignant neoplasm of globus pallidus  
46 malignant neoplasm of hypothalamus  
47 malignant neoplasm of thalamus  
48 malignant neoplasm of cerebrum nos  
49 malignant neoplasm of hippocampus  
50 malignant neoplasm of uncus



1 malignant neoplasm of temporal lobe nos  
2 malignant neoplasm of choroid plexus  
3 spindle cell melanoma, type a  
4 malignant neoplasm of floor of cerebral ventricle  
5 spindle cell melanoma - type a  
6 malignant neoplasm of cerebral ventricle nos  
7 malignant neoplasm of cerebral peduncle  
8 malignant neoplasm of medulla oblongata  
9 malignant neoplasm of midbrain  
10 malignant neoplasm of pons  
11 malignant neoplasm of other parts of brain  
12 malignant neoplasm of corpus callosum  
13 malignant neoplasm of tapetum  
14 malignant neoplasm of other part of brain nos  
15 malignant neoplasm of brain nos  
16 malignant neoplasm of olfactory bulb  
17 malignant neoplasm of cranial nerves nos  
18 malignant neoplasm of cerebral dura mater  
19 malignant neoplasm of cerebral arachnoid mater  
20 malignant neoplasm of cerebral pia mater  
21 malignant neoplasm of cerebral meninges nos  
22 malignant neoplasm of spinal dura mater  
23 malignant neoplasm of spinal arachnoid mater  
24 malignant neoplasm of spinal pia mater  
25 malignant neoplasm of spinal meninges nos  
26 malignant neoplasm of peripheral nerve of thorax  
27 malignant neoplasm of peripheral nerve of abdomen  
28 malignant neoplasm of peripheral nerve of pelvis  
29 malignant neoplasm of other specified part of nervous system  
30 malignant neoplasm of nervous system nos  
31 malignant neoplasm of adrenal gland nos  
32 malignant neoplasm of craniopharyngeal duct  
33 malignant neoplasm of aortic body and other paraganglia  
34 malignant neoplasm of aortic body or paraganglia nos  
35 malignant neoplasm of other specified endocrine gland  
36 malignant neoplasm of other and ill-defined sites  
37 malignant neoplasm of head, neck and face  
38 malignant neoplasm of head nos  
39 malignant neoplasm of cheek nos  
40 malignant neoplasm of nose nos  
41 malignant neoplasm of jaw nos  
42 malignant neoplasm of neck nos  
43 malignant neoplasm of supraclavicular fossa nos  
44 malignant neoplasm of head, neck and face nos  
45 malignant neoplasm of thorax  
46 malignant neoplasm of axilla nos  
47 malignant neoplasm of chest wall nos  
48 malignant neoplasm of intrathoracic site nos  
49 malignant neoplasm of thorax nos  
50 malignant neoplasm of abdomen  
51  
52  
53  
54  
55  
56  
57  
58  
59  
60



1 malignant neoplasm of inguinal region nos  
2 malignant neoplasm of pelvis nos  
3 malignant neoplasm of upper limb nos  
4 malignant neoplasm of lower limb nos  
5 malignant neoplasm of other specified sites  
6 malignant neoplasm of back nos  
7 malignant neoplasm of trunk nos  
8 malignant neoplasm of flank nos  
9 malignant neoplasm of specified site nos  
10 secondary malignant neoplasm of other respiratory organs  
11 secondary malignant neoplasm of other digestive organ  
12 secondary malignant neoplasm of other urinary organs  
13 secondary malignant neoplasm of other urinary organ nos  
14 secondary malignant neoplasm of skin of head  
15 secondary malignant neoplasm of skin of shoulder and arm  
16 secondary malignant neoplasm of skin of hip and leg  
17 secondary malignant neoplasm of skin nos  
18 secondary malignant neoplasm of brain and spinal cord  
19 secondary malignant neoplasm of brain or spinal cord nos  
20 secondary malignant neoplasm of other part of nervous system  
21 secondary malignant neoplasm of cervix uteri  
22 secondary cancer of the cervix  
23 secondary malignant neoplasm of epididymis and vas deferens  
24 secondary malignant neoplasm of other specified site nos  
25 malignant neoplasm of unspecified site  
26 other malignant neoplasm nos  
27 malignant neoplasms of independent (primary) multiple sites  
28 malignant neoplasm of unspecified site nos  
29 malignant neoplasm of other and unspecified site nos  
30 sertoli cell tumour with lipid storage  
31 tubular androblastoma with lipid storage  
32 lipid-rich sertoli cell tumour  
33 malignant mast cell tumours  
34 mast cell malignancy of unspecified site  
35 mast cell malignancy of lymph nodes of head, face and neck  
36 mast cell malignancy of intrathoracic lymph nodes  
37 mast cell malignancy of intra-abdominal lymph nodes  
38 mast cell malignancy of lymph nodes of axilla and upper limb  
39 mast cell malignancy of intrapelvic lymph nodes  
40 mast cell malignancy of spleen  
41 mast cell malignancy of lymph nodes of multiple sites  
42 malignant mast cell tumour nos  
43 granulocytic sarcoma  
44 nephroblastoma  
45 wilms' tumor  
46 embryonal nephroma  
47 embryonal adenosarcoma  
48 renal adenosarcoma  
49 nephroma  
50 wilms' tumour  
51

1 recurrent tumour  
2 recurrent tumor  
3 recurrence of tumor  
4 adenocarcinoma, intestinal type  
5 carcinoma, intestinal type  
6 carcinoma - intestinal type  
7 hepatocellular carcinoma  
8 liver cell carcinoma  
9 hepatocarcinoma  
10 hepatoma, malignant  
11 hepatoma  
12 carcinoma in situ of lip, oral cavity and pharynx nos  
13 carcinoma in situ of oesophagus nos  
14 carcinoma in situ of stomach nos  
15 carcinoma in situ of splenic flexure of colon  
16 carcinoma in situ of colon nos  
17 carcinoma in situ of rectum and rectosigmoid junction  
18 carcinoma in situ of rectum or rectosigmoid junction nos  
19 carcinoma in situ of anus nos  
20 carcinoma in situ of other and unspecified small intestine  
21 carcinoma in situ of hepatic duct  
22 carcinoma in situ of liver or biliary system nos  
23 carcinoma in situ of other and unspecified digestive organs  
24 carcinoma in situ of digestive organs nos  
25 carcinoma in situ of respiratory system  
26 carcinoma in situ of thyroid cartilage  
27 carcinoma in situ of cricoid cartilage  
28 carcinoma in situ of arytenoid cartilage  
29 carcinoma in situ of cuneiform cartilage  
30 carcinoma in situ of aryepiglottic fold  
31 carcinoma in situ of vestibular fold  
32 carcinoma in situ of larynx nos  
33 carcinoma in situ of bronchus and lung  
34 carcinoma in situ of carina of bronchus  
35 carcinoma in situ of upper lobe bronchus and lung  
36 carcinoma in situ of middle lobe bronchus and lung  
37 carcinoma in situ of lower lobe bronchus and lung  
38 carcinoma in situ of bronchus or lung nos  
39 carcinoma in situ of respiratory organ nos  
40 carcinoma in situ of skin of eyelid including canthus  
41 carcinoma in situ of skin of auricle  
42 carcinoma in situ of skin of temple  
43 carcinoma in situ of skin of jaw  
44 carcinoma in situ of scalp and skin of neck  
45 carcinoma in situ of scalp  
46 carcinoma in situ of scalp or skin of neck nos  
47 carcinoma in situ of skin of trunk, excluding scrotum  
48 carcinoma in situ of skin of chest wall nos  
49 carcinoma in situ of skin of abdominal wall  
50 carcinoma in situ of skin of trunk nos

1 carcinoma in situ of skin of upper limb and shoulder  
2 carcinoma in situ of skin of upper arm  
3 carcinoma in situ of skin of lower arm  
4 carcinoma in situ of skin of upper limb or shoulder nos  
5 carcinoma in situ of skin of lower limb and hip  
6 carcinoma in situ of skin of lower leg  
7 carcinoma in situ of skin of lower limb or hip nos  
8 melanoma in situ of scalp and neck  
9 carcinoma in situ of other specified sites of skin  
10 carcinoma in situ of skin nos  
11 carcinoma in situ of breast and genitourinary system  
12 carcinoma in situ of breast  
13 carcinoma in situ of female genital organs nos  
14 carcinoma in situ of male genital organs nos  
15 carcinoma in situ of urinary organs nos  
16 carcinoma in situ of other and unspecified sites  
17 carcinoma in situ of other specified site  
18 carcinoma in situ of other specified site nos  
19 carcinoma in situ nos  
20 unspecified nature neoplasm  
21 neoplasm of unspecified nature  
22 neoplasm of unspecified nature of digestive system  
23 neoplasm of unspecified nature of respiratory system  
24 neoplasm of unspecified nature of bone, skin and soft tissue  
25 neoplasm of unspecified nature of bone  
26 neoplasm of unspecified nature of soft tissue  
27 neoplasm of unspecified nature of skin  
28 neoplasm of unspecified nature of breast  
29 neoplasm of unspecified nature of bladder  
30 neoplasm of unspecified nature of other genitourinary organs  
31 neoplasm of unspecified nature of brain  
32 neoplasm of unspecified nature of other specified sites  
33 neoplasm of unspecified nature nos  
34 [m]neoplasms nos  
35 [m]unspecified tumour cell nos  
36 [m]epithelial neoplasms nos  
37 [m]carcinoma nos  
38 [m]carcinoma, metastatic, nos  
39 [m]large cell carcinoma nos  
40 [m]carcinoma, undifferentiated type, nos  
41 [m]carcinoma, anaplastic type, nos  
42 [m]spheroidal cell carcinoma  
43 [m]small cell carcinoma nos  
44 [m]unspecified epithelial neoplasm  
45 [m]papillary carcinoma nos  
46 [m]verrucous carcinoma nos  
47 [m]squamous cell carcinoma nos  
48 [m]squamous cell carcinoma, metastatic nos  
49 [m]bowen's disease  
50 [m]papillary or squamous cell neoplasm nos

1 [m]basal cell neoplasms  
2 [m]basal cell carcinoma nos  
3 [m]basal cell neoplasm nos  
4 [m]transitional cell papilloma nos  
5 [m]transitional cell carcinoma nos  
6 [m]transitional cell papilloma or carcinoma nos  
7 [m]adenoma nos  
8 [m]adenocarcinoma nos  
9 [m]adenocarcinoma, metastatic, nos  
10 [m]pancreatic adenomas and carcinomas  
11 [m]pancreatic adenoma or carcinoma nos  
12 [m]gastrinoma and carcinomas  
13 [m]gastrinoma or carcinoma nos  
14 [m]hepatobiliary tract adenomas and carcinomas  
15 [m]bile duct adenoma  
16 [m]hepatobiliary adenoma or carcinoma nos  
17 [m]adenomatous and adenocarcinomatous polyps  
18 [m]adenomatous or adenocarcinomatous polyp nos  
19 [m]tubular adenomas and adenocarcinomas  
20 [m]tubular adenoma or adenocarcinoma nos  
21 [m]adenomatous or adenocarcinomatous polyps of the colon nos  
22 [m]solid carcinoma nos  
23 endometrioid adenofibroma, borderline malignancy  
24 [m]carcinoid tumours  
25 endometrioid cystadenofibroma, borderline malignancy  
26 endometrioid cystadenofibroma - borderline malignancy  
27 endometrioid adenofibroma - borderline malignancy  
28 [m]carcinoid tumour nos  
29 [m]carcinoid tumour, malignant  
30 [m]carcinoid tumour, nonargentaffin, nos  
31 [m]carcinoid tumour, nonargentaffin, malignant  
32 [m]carcinoid tumours nos  
33 [m]respiratory tract adenomas and adenocarcinomas  
34 [m]bronchial adenoma nos  
35 [m]respiratory tract adenoma or adenocarcinoma nos  
36 [m]papillary adenomas and adenocarcinomas  
37 [m]papillary adenocarcinoma nos  
38 [m]papillary adenoma or adenocarcinoma nos  
39 [m]villous adenomas and adenocarcinomas  
40 [m]villous adenoma nos  
41 [m]adenocarcinoma in villous adenoma  
42 fibrous histiocytoma  
43 [m]villous adenoma or adenocarcinoma nos  
44 [m]pituitary adenomas and carcinomas  
45 [m]pituitary adenoma or carcinoma nos  
46 [m]oxyphilic adenomas and adenocarcinomas  
47 [m]oxyphilic adenoma or adenocarcinoma nos  
48 [m]clear cell adenomas and adenocarcinomas  
49 [m]clear cell adenocarcinoma nos  
50 [m]clear cell adenoma or adenocarcinoma nos

1 [m]renal adenoma and carcinoma  
2 [m]renal adenoma or carcinoma nos  
3 [m]parathyroid adenomas and adenocarcinomas  
4 [m]parathyroid adenoma or adenocarcinoma nos  
5 [m]mixed cell adenoma and adenocarcinoma  
6 [m]mixed cell adenoma or adenocarcinoma nos  
7 [m]thyroid adenoma and adenocarcinoma  
8 [m]follicular adenocarcinoma nos  
9 [m]thyroid adenoma or adenocarcinoma nos  
10 [m]adrenal cortical tumours nos  
11 [m]endometrioid adenomas and carcinomas  
12 [m]endometrioid adenofibroma nos  
13 [m]endometrioid adenoma or carcinoma nos  
14 [m]adenoma or adenocarcinoma nos  
15 [m]skin appendage adenoma and carcinoma  
16 [m]skin appendage carcinoma  
17 [m]skin appendage adenoma or carcinoma nos  
18 [m]sweat gland adenoma and adenocarcinomas  
19 [m]sweat gland tumour nos  
20 [m]sweat gland adenocarcinoma  
21 [m]sweat gland adenoma or adenocarcinoma nos  
22 [m]apocrine adenoma and adenocarcinomas  
23 [m]apocrine adenoma or adenocarcinoma nos  
24 [m]sebaceous adenoma and adenocarcinoma  
25 [m]sebaceous adenoma or adenocarcinoma nos  
26 [m]ceruminous adenoma and adenocarcinoma  
27 [m]adnexal and skin appendage neoplasm nos  
28 [m]mucoepidermoid neoplasms  
29 [m]mucoepidermoid neoplasm nos  
30 [m]cystic, mucinous and serous neoplasms  
31 [m]cystadenoma and carcinoma  
32 [m]cystadenocarcinoma nos  
33 [m]cystadenoma or carcinoma nos  
34 [m]serous cystadenocarcinoma, nos  
35 [m]papillary cystadenocarcinoma, nos  
36 [m]mucinous cystadenocarcinoma nos  
37 [m]ovarian cystic, mucinous or serous neoplasm nos  
38 [m]mucinous adenoma and adenocarcinoma  
39 [m]mucinous adenoma or adenocarcinoma nos  
40 [m]signet ring carcinoma nos  
41 [m]cystic, mucinous or serous neoplasm nos  
42 [m]ductal, lobular and medullary neoplasms  
43 [m]comedocarcinoma nos  
44 [m]medullary carcinoma nos  
45 [m]intraductal carcinoma and lobular carcinoma in situ  
46 [m]lobular carcinoma nos  
47 [m]ductal, lobular or medullary neoplasm nos  
48 [m]acinar cell neoplasms  
49 [m]acinar cell tumour  
50 [m]acinar cell neoplasm nos

1 [m]complex epithelial neoplasms  
2 [m]thymoma nos  
3 [m]complex epithelial neoplasm nos  
4 [m]specialised gonadal neoplasms  
5 malignant down  
6 [m]thecal cell neoplasms  
7 [m]thecoma nos  
8 [m]theca cell carcinoma  
9 [m]thecal cell neoplasm nos  
10 [m]granulosa cell tumour nos  
11 [m]androblastoma nos  
12 [m]tubular androblastoma nos  
13 [m]leydig cell tumour nos  
14 [m]specialised gonadal neoplasm nos  
15 [m]paragangliomas and glomus tumours  
16 [m]paraganglioma nos  
17 [m]paraganglioma or glomus tumour nos  
18 [m]naevi and melanomas  
19 [m]precancerous melanosis nos  
20 [m]spindle cell melanoma nos  
21 [m]naevi or melanoma nos  
22 [m]soft tissue tumours and sarcomas nos  
23 [m]sarcoma nos  
24 [m]sarcomatosis nos  
25 [m]soft tissue tumour or sarcoma nos  
26 [m]fibromatous neoplasms  
27 retinoblastoma, differentiated  
28 retinoblastoma - differentiated  
29 [m]fibrous histiocytoma nos  
30 [m]fibroxanthoma nos  
31 [m]fibromatous neoplasm nos  
32 [m]liposarcoma nos  
33 [m]angiomyoliposarcoma  
34 [m]myomatous neoplasms  
35 [m]leiomyomatous neoplasms  
36 [m]intravascular leiomyomatosis  
37 [m]leiomyosarcoma nos  
38 [m]leiomyomatous neoplasm nos  
39 [m]angiomyomatous neoplasms  
40 [m]angiomyomatous neoplasm nos  
41 [m]myoma and myosarcoma  
42 [m]myoma or myosarcoma nos  
43 [m]rhabdomyomatous neoplasms  
44 [m]rhabdomyomatous neoplasm nos  
45 [m]myomatous neoplasm nos  
46 [m]mixed tumour, malignant, nos  
47 [m]mixed and stromal renal neoplasms  
48 [m]epithelial nephroblastoma  
49 [m]mesenchymal nephroblastoma  
50 [m]mixed or stromal renal neoplasm nos

1 [m]carcinosarcoma nos  
2 [m]complex mixed or stromal neoplasm nos  
3 [m]fibroepithelial neoplasms  
4 [m]brenner tumours  
5 [m]brenner tumour nos  
6 [m]cystosarcoma phyllodes nos  
7 [m]fibroepithelial neoplasm nos  
8 [m]synovial neoplasms  
9 [m]clear cell sarcoma of tendons and aponeuroses  
10 [m]synovial neoplasm nos  
11 [m]mesothelial neoplasms  
12 [m]mesothelioma, unspecified  
13 [m]mesothelial neoplasm nos  
14 [m]germ cell neoplasms  
15 [m]seminomas  
16 [m]seminoma nos  
17 [m]embryonal carcinoma nos  
18 [m]teratomas  
19 [m]teratoma nos  
20 [m]strumal neoplasms  
21 [m]strumal neoplasm nos  
22 [m]germ cell neoplasm nos  
23 [m]trophoblastic neoplasms  
24 [m]trophoblastic neoplasm nos  
25 [m]mesonephric tumour  
26 [m]blood vessel tumours  
27 [m]haemangioendothelioma nos  
28 [m]haemangiopericytic neoplasm nos  
29 [m]blood vessel tumour nos  
30 [m]lymphangioma nos  
31 [m]small cell osteosarcoma  
32 [m]osteoma or osteosarcoma nos  
33 [m]chondromatous neoplasms  
34 [m]chondrosarcoma nos  
35 [m]chondroblastoma nos  
36 [m]chondromatous neoplasm nos  
37 [m]giant cell tumours  
38 [m]giant cell tumour of bone nos  
39 [m]giant cell tumour of soft parts nos  
40 [m]giant cell tumour nos  
41 [m]miscellaneous bone tumours  
42 [m]miscellaneous bone tumour nos  
43 [m]ameloblastoma nos  
44 [m]odontogenic tumour nos  
45 [m]miscellaneous tumour nos  
46 [m]ependymoma nos  
47 [m]spongioblastoma nos  
48 gliomatosis cerebri  
49 [m]oligodendroglioma nos  
50 [m]medulloblastoma nos

1  
2 [m]cerebellar sarcoma nos  
3 [m]neuroepitheliomatous neoplasms  
4 [m]ganglioneuromatous neoplasms  
5 [m]ganglioneuromatous neoplasm nos  
6 [m]medulloepithelioma nos  
7 [m]neuroepithelioma nos  
8 [m]retinoblastomas  
9 [m]retinoblastoma nos  
10 [m]neuroepitheliomatous neoplasm nos  
11 [m]meningiomas nos  
12 [m]haemangiopericytic meningioma  
13 [m]nerve sheath tumour nos  
14 [m]granular cell tumour nos  
15 [m]granular cell tumour or alveolar soft part sarcoma nos  
16 juxtacortical chondrosarcoma  
17 periosteal chondrosarcoma  
18 [m]microglioma  
19 [m]angioendotheliomatosis  
20 [m]mastocytoma nos  
21 [m]mast cell tumour nos  
22 [m]no microscopic confirmation of tumour  
23 [m]no microscopic confirmation of tumour, clinically nos  
24 [m]neoplasm morphology nos  
25 neoplasms otherwise specified  
26 [x]additional neoplasm classification terms  
27 [x]malignant neoplasm of digestive organs  
28 [x]other sarcomas of the liver  
29 [x]other specified carcinomas of liver  
30 [x]malignant neoplasm of intestinal tract, part unspecified  
31 [x]malignant neoplasm of bronchus or lung, unspecified  
32 [x]malignant neoplasm of mediastinum, part unspecified  
33 [x]malignant neoplasm of bone and articular cartilage  
34 [x]melanoma and other malignant neoplasms of skin  
35 [x]malignant melanoma of skin, unspecified  
36 [x]malignant neoplasm of skin, unspecified  
37 [x]malignant neoplasm of mesothelial and soft tissue  
38 [x]mesothelioma, unspecified  
39 [x]kaposi's sarcoma of multiple organs  
40 [x]kaposi's sarcoma, unspecified  
41 [x]malignant neoplasm of peritoneum, unspecified  
42 [x]malignant neoplasm overlapping lesion of skin  
43 [x]kaposi's sarcoma of other sites  
44 [x]malignant neoplasm of breast  
45 [x]malignant neoplasm of female genital organs  
46 [x]malignant neoplasm of uterine adnexa, unspecified  
47 [x]malignant neoplasm of female genital organ, unspecified  
48 [x]malignant neoplasm of male genital organs  
49 [x]malignant neoplasm of male genital organ, unspecified  
50 [x]malignant neoplasm of urinary tract  
51 [x]malignant neoplasm of urinary organ, unspecified



1 [x]malignant neoplasm of meninges, unspecified  
2 [x]malignant neoplasm of thyroid and other endocrine glands  
3 [x]malignant neoplasm of endocrine gland, unspecified  
4 [x]malignant neoplasm of other specified sites  
5 [x]secondary malignant neoplasm of other specified sites  
6 [x]malignant neoplasm without specification of site  
7 [x]in situ neoplasms  
8 [x]carcinoma in situ of other specified digestive organs  
9 [x]carcinoma in situ of digestive organ, unspecified  
10 [x]carcinoma in situ of other parts of respiratory system  
11 [x]carcinoma in situ of respiratory system, unspecified  
12 [x]melanoma in situ of other and unspecified parts of face  
13 [x]melanoma in situ of other sites  
14 [x]carcinoma in situ of skin of other sites  
15 [x]carcinoma in situ of skin, unspecified  
16 [x]carcinoma in situ of other parts of cervix  
17 [x]carcinoma in situ of other specified sites  
18 [x]melanoma in situ, unspecified  
19 [x]other carcinoma in situ of breast  
20 luteal cell tumour  
21 neoplasms nos  
22 diencephalic syndrome secondary to tumour  
23 gynandroblastoma  
24 odontogenic tumour, malignant  
25 odontogenic tumor, malignant  
26 odontogenic carcinoma  
27 odontogenic sarcoma  
28 intraosseous carcinoma  
29 carcinoma arising in an odontogenic cyst  
30 primary intraosseous carcinoma  
31 malignant odontogenic tumor  
32 other paraproteinaemias  
33 papillary cystic tumor  
34 solid pseudopapillary tumor  
35 solid and papillary epithelial neoplasm  
36 solid and cystic tumor  
37 solid and cystic tumour  
38 solid pseudopapillary tumour  
39 paraproteinaemia nos  
40 transitional carcinoma  
41 urothelial carcinoma  
42 tcc - transitional cell carcinoma  
43 ameloblastic sarcoma  
44 odontogenic fibrosarcoma  
45 myxoliposarcoma  
46 embryonal adenocarcinoma  
47 follicular adenocarcinoma, well differentiated  
48 follicular carcinoma, well differentiated  
49 follicular adenocarcinoma - well differentiated  
50 follicular carcinoma - well differentiated

1 melanotic neurofibroma  
2 germ cell tumor  
3 germ cell tumour  
4 embryonal carcinoma, polyembryonal type  
5 embryonal carcinoma - polyembryonal type  
6 myxosarcoma  
7 villous adenocarcinoma  
8 liposarcoma, well differentiated  
9 liposarcoma, differentiated  
10 sclerosing liposarcoma  
11 lipoma-like liposarcoma  
12 inflammatory liposarcoma  
13 liposarcoma - differentiated  
14 squamous cell carcinoma  
15 squamous carcinoma  
16 squamous cell epithelioma  
17 scc - squamous cell carcinoma  
18 squamous cell carcinoma, no icd-o subtype  
19 squamous cell carcinoma, no international classification of diseases for oncology subtype  
20 angiomyosarcoma  
21 cerebral degeneration due to neoplastic disease  
22 cerebellar ataxia due to neoplasia  
23 myelopathy due to neoplastic disease  
24 lynch syndrome  
25 pheochromocytoma, malignant  
26 pheochromocytoma, malignant  
27 pheochromoblastoma  
28 adrenal medullary paraganglioma, malignant  
29 pheochromoblastoma  
30 malignant pheochromocytoma  
31 multiple cranial nerve palsies in neoplastic disease  
32 nerve root and plexus compressions in neoplastic disease  
33 myasthenic syndrome due to disease ec  
34 myasthenic syndrome due to other malignancy  
35 myasthenic syndrome due to disease nos  
36 malignant myopia  
37 metastatic disseminated retinitis  
38 trabecular adenocarcinoma  
39 trabecular carcinoma  
40 cribriform carcinoma  
41 ductal carcinoma, cribriform type  
42 disorder of optic chiasm due to non-pituitary neoplasm  
43 visual pathway disorder due to neoplasm  
44 visual cortex disorder due to neoplasm  
45 endometrioid adenocarcinoma  
46 endometrioid cystadenocarcinoma  
47 mesothelioma, biphasic, malignant  
48 mesothelioma, biphasic  
49 biphasic mesothelioma  
50 malignant positional vertigo

1 clear cell adenocarcinoma, mesonephroid  
2 clear cell carcinoma  
3 mesonephroid clear cell adenocarcinoma  
4 noninfiltrating intraductal papillary adenocarcinoma  
5 noninfiltrating intraductal papillary carcinoma  
6 intraductal papillary adenocarcinoma  
7 intraductal papillary carcinoma  
8 ductal carcinoma in situ, papillary  
9 dcis, papillary  
10 non-infiltrating intraductal papillary adenocarcinoma  
11 non-infiltrating intraductal papillary carcinoma  
12 [x]paraneoplastic neuromyopathy and neuropathy  
13 basal cell tumor  
14 [x]hydrocephalus in neoplastic disease classified elsewhere  
15 men, type 1  
16 wermer syndrome  
17 mea, type 1  
18 multiple endocrine adenomatosis, type 1  
19 men 1 - multiple endocrine neoplasia syndrome type 1  
20 men 1 syndrome  
21 carotid body tumour  
22 carotid body tumor  
23 carotid body paraganglioma  
24 hypernephroid tumour  
25 hypernephroid tumor  
26 high grade prostatic intraepithelial neoplasia  
27 rhabdosarcoma  
28 rhabdomyosarcoma, no subtype  
29 vipoma, malignant  
30 vipoma  
31 granulosa cell-theca cell tumour  
32 granulosa cell-theca cell tumor  
33 theca cell-granulosa cell tumor  
34 theca cell-granulosa cell tumour  
35 theca cell - granulosa cell tumour  
36 granulosa cell - theca cell tumour  
37 theca cell - granulosa cell tumor  
38 granulosa cell - theca cell tumor  
39 mucocarcinoid tumor  
40 mucinous carcinoid  
41 mucocarcinoid tumour  
42 mucocarcinoid tumor, malignant  
43 mucocarcinoid tumour, malignant  
44 adenosarcoma  
45 pineoblastoma  
46 transitional pineal tumor  
47 pineal parenchymal tumor of intermediate differentiation  
48 mixed pineocytoma-pineoblastoma  
49 mixed pineal tumor  
50 mixed pineal tumour

1 pineal parenchymal tumour of intermediate differentiation  
2 transitional pineal tumour  
3 fast track cancer referral  
4 sympathetic paraganglioma  
5 glomus jugulare tumour  
6 glomus jugulare tumor  
7 jugular paraganglioma  
8 jugulotympanic paraganglioma  
9 strumal carcinoid  
10 struma ovarii and carcinoid  
11 sweat gland carcinoma  
12 sweat gland tumor, malignant  
13 sweat gland tumour, malignant  
14 pulmonary adenomatosis  
15 desmoplastic medulloblastoma  
16 circumscribed arachnoidal cerebellar sarcoma  
17 desmoplastic nodular medulloblastoma  
18 extra-adrenal paraganglioma, malignant  
19 nonchromaffin paraganglioma, malignant  
20 malignant non-chromaffin paraganglioma  
21 malignant extra-adrenal paraganglioma  
22 mixed germ cell tumor  
23 mixed teratoma and seminoma  
24 medullary adenocarcinoma  
25 inflammatory carcinoma  
26 inflammatory adenocarcinoma  
27 haemangioendothelioma, malignant  
28 hemangioendothelioma, malignant  
29 hemangioendothelial sarcoma  
30 haemangioendothelial sarcoma  
31 malignant haemangioendothelioma  
32 malignant hemangioendothelioma  
33 glomerular disorders in neoplastic diseases  
34 [m] angioendotheliomatosis  
35 osteosarcoma in paget's disease of bone  
36 osteosarcoma in paget disease of bone  
37 [m]abdominal desmoid  
38 [m]abdominal fibromatosis  
39 [m]acidophil carcinoma  
40 squamous metaplasia of bladder  
41 [m]acinar cell carcinoma  
42 [m]adamantinoma nos  
43 [m]adamantinoma of long bones  
44 [m]adamantinoma, malignant  
45 [m]adenoacanthoma  
46 [m]adenoameloblastoma  
47 [m]adenocarcinoma in adenomatous polposis coli  
48 [m]adenocarcinoma in adenomatous polyp  
49 [m]adenocarcinoma in situ  
50 [m]adenocarcinoma with apocrine metaplasia

1 [m]adenocarcinoma with cartilaginous and osseous metaplasia  
2 [m]adenocarcinoma with spindle cell metaplasia  
3 [m]adenocarcinoma with squamous metaplasia  
4 [m]adenocarcinoma, intestinal type  
5 [m]adenocarcinomas  
6 [m]adenoid cystic carcinoma  
7 [m]adenoid squamous cell carcinoma  
8 [m]adenoma and adenocarcinomas  
9 [m]adenoma or or adenocarcinoma in polyposis coli  
10 [m]adenomas  
11 [m]adenomas and adenocarcinomas  
12 [m]adenosarcoma  
13 [m]adenosquamous carcinoma  
14 sertoli-leydig cell tumour, well differentiated  
15 [m]adnexal and skin appendage neoplasms  
16 [m]adrenal cortical carcinoma  
17 [m]adrenal cortical tumours  
18 [m]adrenal rest tumour  
19 [m]adult cystic teratoma  
20 [m]aesthesioneuroblastoma  
21 [m]aesthesioneuroepithelioma  
22 [m]aggressive fibromatosis  
23 [m]alpha-cell tumour,malignant  
24 [m]alveolar adenocarcinoma  
25 [m]alveolar cell carcinoma  
26 [m]alveolar rhabdomyosarcoma  
27 [m]amelanotic melanoma  
28 [m]ameloblastic fibrosarcoma  
29 [x]severe vaginal dysplasia, not elsewhere classified  
30 [x]severe vulvar dysplasia, not elsewhere classified  
31 [m]ameloblastic odontosarcoma  
32 [m]ameloblastoma, malignant  
33 [m]androblastoma  
34 fibrous histiocytoma, malignant  
35 fibroxanthoma, malignant  
36 [m]androblastoma, malignant  
37 undifferentiated high grade pleomorphic sarcoma  
38 [m]angioblastoma  
39 [m]angioendothelioma  
40 [m]angiomyosarcoma  
41 [m]angiosarcoma  
42 [m]apocrine adenocarcinoma  
43 [m]argentaffinoma nos  
44 [m]arrhenoblastoma nos  
45 [m]arrhenoblastoma, malignant  
46 [m]astroblastoma  
47 [m]astrocytic glioma  
48 [m]astrocytoma, anaplastic type  
49 [m]astroganglioma  
50 [m]atypical fibrous histiocytoma

1 [m]atypical fibroxanthoma  
2 [m]balloon cell melanoma  
3 [m]basal cell carcinoma, fibroepithelial type  
4 [m]basal cell carcinoma, morphoea type  
5 [m]basal cell tumour  
6 [m]basaloid carcinoma  
7 [m]basophil carcinoma  
8 [m]basosquamous carcinoma  
9 [m]beta-cell tumour, malignant  
10 [m]bile duct carcinoma  
11 [m]bile duct cystadenocarcinoma  
12 [m]biliary tract adenomas and adenocarcinomas  
13 [m]brenner tumour, borderline malignancy  
14 [m]brenner tumour, malignant  
15 [m]brill - symmers' disease  
16 [m]bronchiolar carcinoma  
17 [m]brooke's tumour  
18 [m]brown fat tumour  
19 [m]c cell carcinoma  
20 [m]calcifying epithelial odontogenic tumour  
21 [m]carcinoid bronchial adenoma  
22 [m]carcinoma in situ nos  
23 [m]carcinoma simplex  
24 [m]carcinoma, diffuse type  
25 [m]carcinosarcoma, embryonal type  
26 [m]ceruminous adenocarcinoma  
27 [m]cholangiocarcinoma  
28 [m]cholangioma  
29 [m]chondroblastic osteosarcoma  
30 [m]chondroblastoma, malignant  
31 [m]chondroid syringoma  
32 [m]chondromatous giant cell tumour  
33 [m]chondromyxoid fibroma  
34 [m]chordoma  
35 infiltrating duct and lobular carcinoma  
36 infiltrating duct and lobular carcinoma in situ  
37 lobular and ductal carcinoma  
38 intraductal and lobular carcinoma  
39 infiltrating lobular carcinoma and ductal carcinoma in situ  
40 [m]choriocarcinoma combined with teratoma  
41 glioblastoma with sarcomatous component  
42 [m]chromaffin paraganglioma  
43 [m]chromaffin tumour  
44 granulocytic sarcoma  
45 [m]chromaffinoma  
46 [m]chromophobe carcinoma  
47 [m]chronic lymphoproliferative disease  
48 [m]clear cell adenofibroma  
49 [m]clear cell sarcoma of kidney  
50 [m]cloacogenic carcinoma

1 [m]codman's tumour  
2 [m]colloid adenocarcinoma  
3 [m]comedocarcinoma, noninfiltrating  
4 [m]composite carcinoid  
5 [m]congenital fibrosarcoma  
6 [m]cribriform carcinoma  
7 [m]cylindroid adenocarcinoma  
8 [m]cylindroid bronchial adenoma  
9 [m]cylindroma nos  
10 [m]cystadenofibroma nos  
11 monoclonal gammopathy of undetermined significance  
12 monoclonal gammopathy  
13 paraproteinemia  
14 mgus  
15 [m]cystosarcoma phyllodes, malignant  
16 squamous cell carcinoma, small cell, nonkeratinising  
17 squamous cell carcinoma, small cell, nonkeratinizing  
18 epidermoid carcinoma, small cell, nonkeratinizing  
19 epidermoid carcinoma, small cell, nonkeratinising  
20 non-keratinising epidermoid carcinoma - small cell  
21 non-keratinising squamous cell carcinoma - small cell  
22 non-keratinizing squamous cell carcinoma - small cell  
23 non-keratinizing epidermoid carcinoma - small cell  
24 [m]dermoid cyst  
25 [m]dermoid cyst with malignant transformation  
26 [m]dermoid nos  
27 [m]desmoid nos  
28 [m]desmoplastic fibroma  
29 [m]desmoplastic medulloblastoma  
30 [m]diffuse meningiomatosis  
31 [m]diktyoma  
32 [m]duct carcinoma nos  
33 [m]dysgerminoma  
34 [m]ecchondrosis  
35 hormone secretion by carcinoid tumor  
36 excessive serotonin secretion  
37 hormone secretion by carcinoid tumour  
38 hormonal tumour  
39 hormonal tumor  
40 [m]embryonal hepatoma  
41 [m]embryonal liposarcoma  
42 [m]embryonal rhabdomyosarcoma  
43 [m]embryonal sarcoma  
44 [m]embryonal teratoma  
45 adenocarcinoma, no subtype  
46 [m]endodermal sinus tumour  
47 [m]endometrial stromal sarcoma  
48 [m]endometrioid adenofibroma, borderline malignancy  
49 [m]endometrioid adenofibroma, malignant  
50 [m]endometrioid adenoma, borderline malignancy

1 [m]endometrioid carcinoma  
2 [m]endothelial bone sarcoma  
3 [m]eosinophil carcinoma  
4 [m]ependymblastoma  
5 [m]ependymoma, anaplastic type  
6 [m]epidermoid carcinoma in situ  
7 hemangiopericytoma  
8 perithelioma  
9 [m]epidermoid carcinoma nos  
10 hemangiopericytic meningioma [obs]  
11 haemangiopericytic meningioma [obs]  
12 [m]epidermoid carcinoma, keratinising type  
13 [m]epithelioid cell melanoma  
14 [m]epithelioid cell sarcoma  
15 [m]epithelioid haemangioendothelioma nos  
16 [m]epithelioid leiomyosarcoma  
17 [m]epithelioid mesothelioma, malignant  
18 [m]epithelioma adenoides cyst  
19 [m]epithelioma, malignant  
20 [m]ewing's sarcoma  
21 [m]extra-abdominal desmoid  
22 [m]extra-adrenal paraganglioma, malignant  
23 [m]extra-adrenal paraganglioma, nos  
24 [m]fascial fibrosarcoma  
25 [m]fibrillary astrocytoma  
26 [m]fibroblastic osteosarcoma  
27 [m]fibrochondrosarcoma  
28 alveolar adenocarcinoma  
29 alveolar carcinoma  
30 [m]fibroliposarcoma  
31 [m]fibromyxosarcoma  
32 [m]fibrous histiocytoma, malignant  
33 [m]fibrous mesothelioma, malignant  
34 [m]fibroxanthoma, malignant  
35 [m]follicular adenocarcinoma, trabecular type  
36 [m]follicular adenocarcinoma, well differentiated type  
37 [m]g cell tumour nos  
38 [m]g cell tumour, malignant  
39 [m]gangliocytoma  
40 [m]ganglioglioma  
41 [m]ganglioneuroblastoma  
42 [m]ganglioneuroma  
43 [m]gastrinoma, malignant  
44 [m]gelatinous adenocarcinoma  
45 [m]gemistocytic astrocytoma  
46 [m]gemistocytoma  
47 [m]germinoma  
48 [m]giant cell and spindle cell carcinoma  
49 [m]giant cell bone sarcoma  
50 [m]giant cell carcinoma



1 [m]giant cell glioblastoma  
2 [m]giant cell tumour of bone, malignant  
3 [m]giant pigmented naevus  
4 [m]glioblastoma multiforme  
5 [m]glioblastoma with sarcomatous component  
6 [m]glioma nos  
7 [m]glioma, malignant  
8 [m]gliomatosis cerebri  
9 [m]glioneuroma  
10 [m]gliosarcoma  
11 [m]glomangiosarcoma  
12 [m]glomoid sarcoma  
13 [m]glomus tumour  
14 [m]glucagonoma, malignant  
15 [m]goblet cell tumour  
16 [m]gonadal stromal tumour  
17 [m]gonadoblastoma  
18 [m]gonocytoma  
19 [m]granular cell carcinoma  
20 [m]granular cell tumour, malignant  
21 [m]granular cell tumours and alveolar soft part sarcoma  
22 [m]granulosa cell tumour, malignant  
23 [m]granulosa cell-theca cell tumour  
24 [m]grawitz tumour  
25 [m]gynandroblastoma  
26 [m]haemangioblastoma  
27 [m]haemangioendothelioma, malignant  
28 [m]haemangiomatous tumours  
29 [m]haemangiopericytic neoplasms  
30 [m]haemangiopericytoma, malignant  
31 [m]haemangiosarcoma  
32 [m]hepatoblastoma  
33 epithelioid cell melanoma  
34 [m]hepatocholangiocarcinoma  
35 [m]hepatoma nos  
36 [m]hepatoma, malignant  
37 synovial sarcoma, spindle cell  
38 synovial sarcoma, monophasic fibrous  
39 synovial sarcoma - spindle cell  
40 [m]histiocytoma nos  
41 mixed basal-squamous cell carcinoma  
42 mixed basal - squamous cell carcinoma  
43 basisquamous cell carcinoma  
44 [m]hurthle cell adenocarcinoma  
45 persistent intestinal end of vitelline duct  
46 md - meckel's diverticulum  
47 meckel diverticulum  
48 [m]hypernephroid tumour  
49 [m]hypernephroma  
50 [m]immature teratoma

1 [m]infantile embryonal carcinoma  
2 [m]infantile fibrosarcoma  
3 [m]infiltrating duct carcinoma  
4 [m]infiltrating ductular carcinoma  
5 [m]inflammatory carcinoma  
6 [m]insulinoma, malignant  
7 [m]interstitial cell tumour nos  
8 [m]interstitial cell tumour, malignant  
9 [m]intracystic carcinoma nos  
10 [m]intraductal carcinoma, noninfiltrating nos  
11 [m]intraepidermal carcinoma nos  
12 [m]intraepit neop,grade iii,of cervix, vulva and vagina  
13 [m]intraepithelial carcinoma nos  
14 [m]intraepithelial squamous cell carcinoma  
15 [m]intraosseous carcinoma  
16 [m]intravascular bronchial alveolar tumour  
17 [m]invasive fibroma  
18 [m]invasive mole nos  
19 [m]islet cell carcinoma  
20 [m]jugular paraganglioma  
21 tumour-induced hyperinsulinaemia  
22 hyperinsulinaemia due to ectopic tumour source  
23 [m]juvenile astrocytoma  
24 [m]juvenile breast carcinoma  
25 [m]juxtacortical chondrosarcoma  
26 [m]juxtacortical osteogenic sarcoma  
27 [m]krukenberg tumour  
28 [m]kupffer cell sarcoma  
29 [m]leiomyoblastoma  
30 [m]lentigo maligna  
31 synovial osteochondromatosis  
32 synovial osteochondromatosis of shoulder  
33 [m]lentigo maligna melanoma  
34 synovial osteochondromatosis of acromioclavicular joint  
35 synovial osteochondromatosis of elbow  
36 synovial osteochondromatosis of wrist  
37 synovial osteochondromatosis of hip  
38 [m]leptomeningeal sarcoma  
39 synovial osteochondromatosis of knee  
40 synovial osteochondromatosis of ankle  
41 synovial osteochondromatosis of talonavicular joint  
42 synovial osteochondromatosis of other tarsal joint  
43 [m]leydig cell tumour  
44 [m]leydig cell tumour, malignant  
45 [m]lipid cell tumour of ovary  
46 progressive malignant polyserositis  
47 linitis plastica  
48 [m]liposarcoma, well differentiated type  
49 [m]liver cell carcinoma  
50 [m]lobular carcinoma in situ

1 [m]lymphangiomatous tumours  
2 [m]lymphangiomyomatosis  
3 [m]lymphangiosarcoma  
4 [m]lymphoblastoma nos  
5 [m]lymphoepithelial carcinoma  
6 [m]malherbe's calcified epithelioma  
7 [m]malig lymph, follicular centre cell, cleaved, follicular  
8 [m]malig lymph, lymphocytic, intermediate different, nodular  
9 [m]malig lymph, lymphocytic, poorly differentiated, nodular  
10 [m]malig lymph, follicular centre cell, noncleaved, follicular  
11 [m]malignant giant cell tumour of soft parts  
12 [m]malignant melanoma in giant pigmented naevus  
13 [m]malignant melanoma in junctional naevus  
14 paget's disease-cervical spine  
15 paget's disease-thoracic spine  
16 paget's disease-lumbar spine  
17 [m]malignant melanoma in precancerous melanosis  
18 paget's disease-sacrum  
19 paget's disease-coccyx  
20 paget's disease-clavicle  
21 paget's disease-scapula  
22 paget's disease-radius  
23 paget's disease-ulna  
24 paget's disease-carpal bone  
25 paget's disease-metacarpal  
26 paget's disease-femur  
27 paget's disease-patella  
28 paget's disease-tibia  
29 paget's disease-fibula  
30 paget's disease-calcaneum  
31 paget's disease-talus  
32 paget's disease-other tarsal bone  
33 paget's disease-metatarsal  
34 paget's disease-multiple sites  
35 paget's disease os  
36 paget's disease nos  
37 osteitis deformans in neoplastic disease  
38 [m]malignant teratoma, intermediate type  
39 [m]malignant teratoma, trophoblastic  
40 [m]malignant teratoma, undifferentiated type  
41 [m]malignant tumour, fusiform cell type  
42 [m]malignant tumour, giant cell type  
43 undifferentiated carcinoma  
44 [m]malignant tumour, small cell type  
45 [m]masculinovoblastoma  
46 [m]mast cell sarcoma  
47 [m]mast cell tumours  
48 [m]mature teratoma  
49 [m]medullary carcinoma with amyloid stroma  
50 fracture of bone in neoplastic disease

1 brown tumour of hyperparathyroidism  
2 [m]medullomyoblastoma  
3 [m]melanoameloblastoma  
4 [m]melanocarcinoma  
5 [m]melanoma nos  
6 [m]melanosarcoma nos  
7 [m]melanotic neuroectodermal tumour  
8 astroglioma  
9 astrocytic glioma  
10 cystic astrocytoma  
11 diffuse astrocytoma, low grade  
12 [m]melanotic neurofibroma  
13 diffuse astrocytoma  
14 astrocytoma, low grade  
15 astrocytoma, no icd-o subtype  
16 astrocytoma, no international classification of diseases for oncology subtype  
17 [m]melanotic progonoma  
18 [m]meningeal sarcomatosis  
19 [m]meningioma, malignant  
20 [m]meningothelial sarcoma  
21 [m]mesenchymal chondrosarcoma  
22 [m]mesenchymoma nos  
23 [m]mesenchymoma, malignant  
24 [m]mesodermal mixed tumour  
25 [m]mesonephroma, malignant  
26 [m]mesonephromas  
27 [m]mesothelioma, biphasic type, malignant  
28 [m]mesothelioma, malignant  
29 [m]metastatic signet ring cell carcinoma  
30 [m]metatypical carcinoma  
31 mixed cell adenocarcinoma  
32 [m]miscellaneous reticuloendothelial neoplasm nos  
33 [m]miscellaneous reticuloendothelial neoplasms  
34 [m]miscellaneous tumours  
35 hemangiosarcoma  
36 [m]mixed acidophil-basophil carcinoma  
37 diktyoma  
38 diktyoma, malignant  
39 [m]mixed cell adenocarcinoma  
40 [m]mixed cell rhabdomyosarcoma  
41 [m]mixed epithelioid and spindle melanoma  
42 papillary epidermoid carcinoma  
43 [m]mixed glioma  
44 [m]mixed islet cell and exocrine adenocarcinoma  
45 [m]mixed glioma  
46 [m]mixed tumour nos  
47 [m]mixed type liposarcoma  
48 [m]monstrocellular sarcoma  
49 [m]morphology of neoplasms  
50 [m]mucin-producing adenocarcinoma

1 [m]mucinous adenocarcinoma  
2 [m]mucinous adenofibroma  
3 [m]mucinous cystadenoma, borderline malignancy  
4 [m]mucoepidermoid carcinoma  
5 [m]mucoepidermoid tumour  
6 [m]mucooid adenocarcinoma  
7 [m]mucooid cell carcinoma  
8 balloon cell melanoma  
9 [m]mucous adenocarcinoma  
10 [m]mullerian mixed tumour  
11 [m]multicentric basal cell carcinoma  
12 [m]multiple endocrine adenomas  
13 [m]multiple haemorrhagic sarcoma  
14 [m]multiple meningiomas  
15 intraepidermal epithelioma of jadassohn  
16 [m]myoepithelioma  
17 [m]myofibromatosis  
18 cholangioma  
19 [m]myosarcoma  
20 [m]myxoid chondrosarcoma  
21 [m]myxoid liposarcoma  
22 [m]myxoliposarcoma  
23 [m]myxopapillary ependymoma  
24 chondromyxoid fibroma  
25 cmf - chondromyxoid fibroma  
26 [m]naevocarcinoma  
27 tumor cells  
28 tumour cells  
29 [m]neoplasm, malig, uncertain whether primary or metastatic  
30 [m]neoplasm, malignant  
31 [m]neoplasm, metastatic  
32 [m]nephromas and nephroblastomas  
33 [m]nerve sheath tumour  
34 [m]neurilemmoma nos  
35 [m]neurilemmoma, malignant  
36 [m]neuroastrocytoma  
37 [m]neurocytoma  
38 meckel's diverticulum, unspecified  
39 meckel's diverticulum nos  
40 [m]neurofibrosarcoma  
41 primitive neuroectodermal tumour  
42 primitive neuroectodermal tumor  
43 supratentorial pnet  
44 pnet  
45 central primitive neuroectodermal tumor  
46 cpnet  
47 central primitive neuroectodermal tumour  
48 pnet - primitive neuroectodermal tumour  
49 pnet - primitive neuroectodermal tumor  
50 [m]no microscopic confirmation of tumour, clinically malig

1 [m]no microscopic confirmation tumour, clinically metastatic  
2 [m]nodular melanoma  
3 [m]nonencapsulated sclerosing carcinoma  
4 [m]noninfiltrating intracystic carcinoma  
5 [m]noninfiltrating intraductal papillary adenocarcinoma  
6 [m]oat cell carcinoma  
7 [m]odontoameloblastoma  
8 [m]odontogenic fibrosarcoma  
9 [m]odontogenic tumour nos  
10 mucoepidermoid tumour  
11 [m]odontogenic tumour, malignant  
12 mucoepidermoid tumor [obs]  
13 malignant melanoma, regressing  
14 [m]odontogenic tumours  
15 [m]olfactory neuroblastoma  
16 [m]olfactory neuroepithelioma  
17 [m]olfactory neurogenic tumour  
18 [m]oligodendroblastoma  
19 [m]oligodendroglioma, anaplastic type  
20 [m]onocytic adenocarcinoma  
21 [m]orchioblastoma  
22 [m]osteoblastic sarcoma  
23 craniopharyngioma  
24 rathke's pouch tumor  
25 rathke's pouch tumour  
26 [m]osteochondrosarcoma  
27 [m]osteoclastoma  
28 [m]osteoclastoma, malignant  
29 [m]osteofibrosarcoma  
30 [m]osteogenic sarcoma nos  
31 [m]osteosarcoma in paget's disease of bone  
32 [m]ovarian cystadenoma or carcinoma  
33 [m]ovarian mucinous tumour  
34 [m]oxyphilic adenocarcinoma  
35 [m]pacinian tumour  
36 [m]paget's disease and infiltrating breast duct carcinoma  
37 [m]paget's disease, breast  
38 [m]paget's disease, extramammary, exc paget's disease bone  
39 [m]paget's disease, mammary  
40 spindle cell melanoma, type b  
41 spindle cell melanoma - type b  
42 [m]papillary and follicular adenocarcinoma  
43 [m]papillary carcinoma in situ  
44 [m]papillary cystadenoma, borderline malignancy  
45 [m]papillary ependymoma  
46 [m]papillary epidermoid carcinoma  
47 [m]papillary meningioma  
48 [m]papillary mucinous cystadenocarcinoma  
49 [m]papillary serous cystadenocarcinoma  
50 [m]papillary serous cystadenoma, borderline malignancy

1 [m]papillary squamous cell carcinoma  
2 [m]papillary transitional cell carcinoma  
3 [m]parafollicular cell carcinoma  
4 [m]paraganglioma, malignant  
5 [m]parasympathetic paraganglioma  
6 [m]parosteal osteosarcoma  
7 [m]periosteal fibrosarcoma  
8 [m]periosteal osteogenic sarcoma  
9 [m]phaeochromoblastoma  
10 [m]phaeochromocytoma, malignant  
11 [m]pick's tubular adenoma  
12 [m]pilocytic astrocytoma  
13 [m]piloid astrocytoma  
14 [m]pinealoma  
15 [m]pineoblastoma  
16 [m]pineocytoma  
17 [m]pleomorphic adenoma  
18 [m]pleomorphic carcinoma  
19 [m]pleomorphic cell sarcoma  
20 [m]pleomorphic liposarcoma  
21 [m]pleomorphic rhabdomyosarcoma  
22 [m]pneumoblastoma  
23 [m]polyembryoma  
24 [m]polyembryonal embryonal carcinoma  
25 [m]polygonal cell carcinoma  
26 masculinovoblastoma  
27 steroid cell tumour  
28 lipoid cell tumour of ovary  
29 [m]polyvesicular vitelline tumour  
30 [m]primitive polar spongioblastoma  
31 [m]protoplasmic astrocytoma  
32 [m]pseudomucinous adenocarcinoma  
33 [m]pseudomucinous cystadenoma nos  
34 [m]pseudosarcomatous carcinoma  
35 [m]pulmonary adenomatosis  
36 [m]renal cell carcinoma  
37 [m]reninoma  
38 [m]reserve cell carcinoma  
39 diffuse meningiomas  
40 multiple meningiomas  
41 [m]reticulum cell sarcoma nos  
42 [m]retinal angle tumour  
43 [m]retinoblastoma, differentiated type  
44 [m]retinoblastoma, undifferentiated type  
45 [m]round cell carcinoma  
46 [m]round cell liposarcoma  
47 [m]round cell sarcoma  
48 [m]sarcoma botryoides  
49 [m]schneiderian carcinoma  
50 [m]schwannoma nos

1 [m]schwannoma, malignant  
2 [m]scirrhous adenocarcinoma  
3 [m]secondary carcinoma  
4 [m]secondary neoplasm  
5 [m]secretory breast carcinoma  
6 [m]seminoma, anaplastic type  
7 [m]serous adenofibroma  
8 [m]serous cystadenoma, borderline malignancy  
9 [m]serous surface papillary carcinoma  
10 [m]sertoli cell adenoma  
11 [m]sertoli cell carcinoma  
12 [m]sertoli cell tumour  
13 [m]sertoli cell tumour with lipid storage  
14 [m]sertoli-leydig cell tumour  
15 [m]sex cord-stromal tumour  
16 [m]signet ring carcinoma  
17 [m]signet ring cell carcinoma  
18 [m]small cell carcinoma, fusiform cell type  
19 [m]small cell sarcoma  
20 [m]smooth muscle tumour nos  
21 [m]solid carcinoma with amyloid stroma  
22 [m]solid teratoma  
23 [m]spermatocytic seminoma  
24 [m]spindle cell carcinoma  
25 [m]spindle cell melanoma, type a  
26 [m]spindle cell melanoma, type b  
27 [m]spindle cell sarcoma  
28 [m]spinous cell carcinoma  
29 [m]spongioblastoma multiforme  
30 [m]spongioblastoma polare  
31 [m]spongioneuroblastoma  
32 [m]squamous cell ca-in-situ, questionable stromal invasion  
33 [m]squamous cell carcinoma, large cell, non-keratinising  
34 [m]squamous cell carcinoma, microinvasive  
35 [m]squamous cell carcinoma, small cell, non-keratinising  
36 lymphmatoid granulomatosis  
37 [m]squamous cell carcinoma, spindle cell type  
38 malignant hydatidiform mole  
39 [m]squamous odontogenic tumour  
40 [m]stromal endometriosis  
41 [m]struma ovarii, malignant  
42 [m]strumal carcinoid  
43 renal cell carcinoma  
44 renal cell adenocarcinoma  
45 grawitz tumor  
46 hypernephroma  
47 grawitz tumour  
48 [m]subependymal astrocytoma nos  
49 [m]subependymal astrocytoma nos  
50 [m]subependymal glioma



1 [m]superficial spreading adenocarcinoma  
2 [m]superficial spreading melanoma  
3 [m]sympathetic paraganglioma  
4 [m]sympathicoblastoma  
5 [m]synovial sarcoma, biphasic type  
6 [m]synovial sarcoma, epithelioid cell type  
7 [m]synovial sarcoma, spindle cell type  
8 [m]telangiectatic osteosarcoma  
9 [m]teratoblastoma, malignant  
10 [m]teratocarcinoma  
11 [m]teratoid medulloepithelioma  
12 [m]teratoma nos  
13 [m]testicular adenoma  
14 secretory carcinoma of the breast  
15 [m]thymoma  
16 [m]thymoma, malignant  
17 [m]trabecular adenocarcinoma  
18 [m]transitional cell carcinoma in situ  
19 [m]transitional cell carcinoma, spindle cell type  
20 [m]transitional cell papilloma, inverted type  
21 [m]transitional cell papillomas and carcinomas  
22 [m]tubular adenocarcinoma  
23 [m]tubular androblastoma with lipid storage  
24 [m]tumour cells, malignant  
25 [m]tumour embolism  
26 [m]tumour embolus  
27 [m]tumour morphology  
28 [m]tumourlet  
29 [m]turban tumour  
30 [m]urinary bladder papilloma  
31 [m]urothelial carcinoma  
32 [m]urothelial papilloma  
33 brenner tumour, malignant  
34 brenner tumor, malignant  
35 malignant brenner tumour  
36 malignant brenner tumor  
37 [m]verrucous epidermoid carcinoma  
38 [m]verrucous squamous cell carcinoma  
39 [m]villous adenocarcinoma  
40 [m]villous papilloma  
41 [m]warthin's tumour  
42 [m]water-clear cell adenocarcinoma  
43 [m]wilms' tumour  
44 [m]wolffian duct carcinoma  
45 [m]wuchernde struma langhans  
46 [m]yolk sac tumour  
47 epithelioid leiomyosarcoma  
48 siewert syndrome  
49 giant cell carcinoma  
50 teratoma, differentiated

1  
2 adult teratoma  
3 cystic teratoma  
4 mature teratoma  
5 differentiated teratoma  
6 [so] subsidiary classification of operation sites nos  
7 [so] subsidiary classification of operation sites os  
8 pulmonary blastoma  
9 pneumoblastoma  
10 round cell liposarcoma  
11 lipoblastic liposarcoma  
12 basal cell carcinoma, fibroepithelial  
13 pinkus tumor  
14 fibroepithelioma  
15 fibroepithelioma of pinkus type  
16 fibroepithelial basal cell carcinoma, pinkus type  
17 pinkus tumour  
18 calcifying epithelioma of malherbe  
19 hair matrix tumour  
20 urinary bladder instillation of anticarcinogenic agent  
21 malignant melanoma in hutchinson's melanotic freckle  
22 lentigo maligna melanoma  
23 malignant melanoma in hutchinson melanotic freckle  
24 mixed mesenchymal tumor  
25 mixed mesenchymal tumour  
26 mesenchymomas  
27 giant cell glioblastoma  
28 monstrocellular sarcoma [obs]  
29 [so]digestive tract and abdominal organs nos  
30 [so]digestive tract or abdominal organs os  
31 pigmented epitheliomatosis  
32 choriocarcinoma  
33 chorionepithelioma  
34 chorioepithelioma  
35 syncytioma  
36 choriocarcinoma, no icd-o subtype  
37 choriocarcinoma, no international classification of diseases for oncology subtype  
38 [so]endocrine, breast and special senses nos  
39 [so]endocrine, breast or special senses os  
40 leydig cell tumor  
41 interstitial cell tumor  
42 interstitial cell tumour  
43 leydig cell tumour, no icd-o subtype  
44 leydig cell tumor, no icd-o subtype  
45 leydig cell tumor, no international classification of diseases for oncology subtype  
46 embryonal hepatoma  
47 hbl - hepatoblastoma  
48 papilloma of bladder  
49 papilloma of urinary bladder  
50 transitional cell papilloma  
51 mesenteric fibromatosis

1 retroperitoneal fibromatosis  
2 musculo-aponeurotic fibromatosis  
3 acinic cell adenocarcinoma  
4 acinar adenocarcinoma  
5 acinar carcinoma  
6 squamous cell carcinoma, large cell, nonkeratinising  
7 squamous cell carcinoma, large cell, nonkeratinizing  
8 epidermoid carcinoma, large cell, nonkeratinizing  
9 squamous cell carcinoma, nonkeratinizing  
10 epidermoid carcinoma, large cell, nonkeratinising  
11 squamous cell carcinoma, nonkeratinising  
12 non-keratinising squamous cell carcinoma  
13 non-keratinising epidermoid carcinoma - large cell  
14 non-keratinising squamous cell carcinoma - large cell  
15 non-keratinizing squamous cell carcinoma - large cell  
16 non-keratinizing squamous cell carcinoma  
17 non-keratinizing epidermoid carcinoma - large cell  
18 poisoning caused by antineoplastic antibiotic  
19 antineoplastic antibiotic poisoning nos  
20 carcinoma simplex  
21 transitional cell papilloma, inverted  
22 transitional papilloma, inverted  
23 schneiderian papilloma, inverted  
24 oncocytic schneiderian papilloma  
25 cylindrical cell papilloma  
26 columnar cell papilloma  
27 inverted transitional cell papilloma  
28 polyglandular activity in multiple endocrine adenomatosis  
29 familial polyendocrine adenomatosis  
30 multiple endocrine neoplasia  
31 men - multiple endocrine neoplasia  
32 multiple endocrine tumasia  
33 mea - multiple endocrine adenomatosis  
34 angioendotheliomatosis  
35 basophil adenocarcinoma  
36 mucoid cell adenocarcinoma  
37 extra-abdominal desmoid  
38 invasive fibroma  
39 desmoid-type fibromatosis  
40 desmoid tumor  
41 desmoid tumour  
42 adenocarcinoma in multiple adenomatous polyps  
43 malignant giant cell tumour of soft parts  
44 malignant giant cell tumor of soft parts  
45 malignant giant cell tumour of soft tissue  
46 malignant giant cell tumor of soft tissue  
47 enterochromaffin cell carcinoid  
48 carcinoid tumor, argentaffin, malignant  
49 argentaffinoma, malignant  
50 serotonin producing carcinoid  
51  
52  
53  
54  
55  
56  
57  
58  
59  
60

1 ec cell carcinoid  
2 carcinoid tumour, argentaffin, malignant  
3 malignant carcinoid tumour - argentaffin  
4 malignant carcinoid tumor - argentaffin  
5 [so]other operation sites and laterality  
6 malignant argentaffinoma  
7 [so]other specified part of respiratory tract or mouth  
8 astroblastoma  
9 odontoameloblastoma  
10 liposarcoma  
11 fibroliposarcoma  
12 liposarcoma morphology  
13 liposarcoma, no icd-o subtype  
14 liposarcoma, no international classification of diseases for oncology subtype  
15 [so]respiratory tract and mouth nos  
16 adverse reaction to antineoplastic antibiotics  
17 kaposi's sarcoma  
18 multiple hemorrhagic sarcoma  
19 multiple haemorrhagic sarcoma  
20 kaposi's sarcoma, morphology  
21 kaposi sarcoma, morphology  
22 systemic tissue mast cell disease  
23 bile duct cystadenocarcinoma  
24 mixed epithelioid and spindle cell melanoma  
25 acidophil carcinoma  
26 eosinophil adenocarcinoma  
27 acidophil adenocarcinoma  
28 eosinophil carcinoma  
29 mixed adenoneuroendocrine carcinoma  
30 composite carcinoid  
31 combined carcinoid and adenocarcinoma  
32 mixed carcinoid-adenocarcinoma  
33 adenocarcinoma in situ in tubulovillous adenoma  
34 ais - adenocarcinoma in situ  
35 heart base tumor  
36 nonchromaffin paraganglioma  
37 heart base tumour  
38 desmoplastic melanoma, malignant  
39 neurotropic melanoma, malignant  
40 desmoplastic melanoma, amelanotic  
41 malignant neurotropic melanoma  
42 congenital fibrosarcoma  
43 combined hepatocellular carcinoma and cholangiocarcinoma  
44 mixed hepatocellular and bile duct carcinoma  
45 hepatocholangiocarcinoma  
46 parasympathetic paraganglioma  
47 malignant megakaryocytosis  
48 thecoma  
49 theca cell tumor  
50 fibrothecoma

1 theca cell tumour  
2 thecoma, no icd-o subtype  
3 thecoma, no international classification of diseases for oncology subtype  
4 melanoma in situ of skin  
5 aortic body tumour  
6 aortic body tumor  
7 aortic body paraganglioma  
8 aorticopulmonary paraganglioma  
9 urothelial carcinoma in situ  
10 pancreatoblastoma  
11 fibrosarcoma  
12 olfactory neurogenic tumour  
13 olfactory neurogenic tumor  
14 epithelioid haemangioendothelioma, malignant  
15 epithelioid hemangioendothelioma, malignant  
16 intravascular bronchial alveolar tumor [obs]  
17 intravascular bronchial alveolar tumour [obs]  
18 epithelioid haemangioendothelioma  
19 epithelioid hemangioendothelioma  
20 adrenal rest tumour  
21 fibrous mesothelioma  
22 spindled mesothelioma  
23 sarcomatoid mesothelioma  
24 desmoplastic mesothelioma  
25 paget's disease and intraductal carcinoma of breast  
26 paget disease and intraductal carcinoma of breast  
27 sebaceous adenocarcinoma  
28 sebaceous carcinoma  
29 t-gamma lymphoproliferative disease  
30 protoplasmic astrocytoma  
31 ssm - superficial spreading melanoma  
32 ssmm - superficial spreading melanoma  
33 osteoblastoma  
34 neoplasia  
35 ng - neoplastic growth  
36 neoplastic growth  
37 new growth  
38 ng - new growth  
39 astrocytoma, anaplastic  
40 malignant astrocytoma  
41 [v]follow-up exam aft combined treatment for malig neoplasm  
42 skin appendage tumour  
43 adnexal tumour  
44 [v]follow-up examination aft surgery for malignant neoplasm  
45 [v]folow-up exam aft other treatment for malignant neoplasm  
46 [v]folow-up exam aft unspec treatment for malignant neoplasm  
47 teratoma  
48 solid teratoma  
49 teratoma, no icd-o subtype  
50 teratoma, no international classification of diseases for oncology subtype

1 neuroendocrine carcinoma  
2 synovial sarcoma, epithelioid cell  
3 synovial sarcoma - epithelioid cell  
4 adenocarcinoma with cartilaginous and osseous metaplasia  
5 adenocarcinoma with cartilaginous metaplasia  
6 adenocarcinoma with osseous metaplasia  
7 mesenchymal chondrosarcoma  
8 necrotising sialometaplasia  
9 infiltrating basal cell carcinoma, sclerosing  
10 infiltrating basal cell carcinoma, non-sclerosing  
11 basal cell carcinoma, morpheic  
12 basal cell carcinoma, desmoplastic type  
13 adamantinoma of long bones  
14 hepatocellular carcinoma  
15 hepatoblastoma of liver  
16 primary angiosarcoma of liver  
17 apocrine adenocarcinoma  
18 giant cell tumour of bone  
19 osteoclastoma  
20 adenocarcinoma in adenomatous polyposis coli  
21 oncocytic carcinoma  
22 oncocytic adenocarcinoma  
23 hurthle cell carcinoma  
24 follicular carcinoma, oxyphilic cell  
25 clear cell meningioma  
26 chordoid meningioma  
27 angiomyxoma  
28 aggressive angiomyxoma  
29 ceruminous adenocarcinoma  
30 ceruminous carcinoma  
31 clear cell adenofibroma  
32 clear cell cystadenofibroma  
33 anaplastic carcinoma  
34 malignant malnutrition  
35 malignant granuloma of face  
36 lethal midline granuloma of face  
37 trichoepithelioma  
38 epithelioma adenoides cysticum  
39 brooke's tumour  
40 epithelioid sarcoma  
41 mixed adenocarcinoma and squamous cell carcinoma  
42 mixed adenocarcinoma and epidermoid carcinoma  
43 squamous cell carcinoma in situ  
44 epidermoid carcinoma in situ  
45 iec - intraepidermal carcinoma  
46 squamous cell carcinoma in situ, no icd-o subtype  
47 squamous cell carcinoma in situ, no international classification of diseases for oncology subtype  
48 embryonal sarcoma  
49 adenocarcinoma in situ in adenomatous polyp  
50 adenocarcinoma in situ in tubular adenoma

1 carcinoma in situ in adenomatous polyp  
2 adenocarcinoma in situ in polypoid adenoma  
3 carcinoma in situ in a polyp  
4 islet cell carcinoma  
5 islet cell adenocarcinoma  
6 pancreatic endocrine tumour, malignant  
7 pancreatic endocrine tumor, malignant  
8 endocrine adenomatosis  
9 adenoameloblastoma  
10 multicentric basal cell carcinoma  
11 hutchinson's melanotic freckle  
12 lentigo maligna  
13 hutchinson melanotic freckle  
14 [x] adverse react to antineoplastic/immunosuppress drugs nos  
15 mesothelioma, malignant  
16 malignant mesothelioma  
17 [x] adverse reaction to actinomycin d  
18 androblastoma  
19 arrhenoblastoma  
20 androblastoma, no icd-o subtype  
21 androblastoma, no international classification of diseases for oncology subtype  
22 mixed type rhabdomyosarcoma  
23 mixed embryonal rhabdomyosarcoma and alveolar rhabdomyosarcoma  
24 [x] adverse reaction to antineoplastic antibiotics  
25 [x] adverse reaction to antineoplastic antibiotics nos  
26 postmastectomy lymphangiosarcoma syndrome  
27 lymphangiosarcoma of stewart and treves  
28 lymphangiosarcoma of skin  
29 pigmented dermatofibrosarcoma protuberans  
30 bednar tumor  
31 bednar tumour  
32 cervical cancer screening refused  
33 malignant tertian malaria  
34 mt - malignant tertian malaria  
35 mtm - malignant tertian malaria  
36 nonencapsulated sclerosing carcinoma  
37 nonencapsulated sclerosing adenocarcinoma  
38 nonencapsulated sclerosing tumor  
39 papillary carcinoma, diffuse sclerosing  
40 nonencapsulated sclerosing tumour  
41 [x] adverse reaction to bleomycin  
42 [x] adverse reaction to busulfan  
43 [x] adverse reaction to carboplatin  
44 [x] adverse reaction to carmustine  
45 [x] adverse reaction to chlorambucil  
46 synovial sarcoma  
47 synovioma, malignant  
48 synovioma  
49 [x] adverse reaction to cisplatin  
50 lymphangiosarcoma

1 lymphangioendothelial sarcoma  
2 lymphangioendothelioma, malignant  
3 malignant lymphangioendothelioma  
4 [x] adverse reaction to cyclophosphamide  
5 [x] adverse reaction to cytarabine  
6 lipoblastomatosis  
7 lipoblastoma  
8 lipoblastoma and/or lipoblastomatosis  
9 spongioblastoma multiforme  
10 glm - glioblastoma multiforme  
11 gbm - glioblastoma multiforme  
12 glioblastoma, no icd-o subtype  
13 glioblastoma, no international classification of diseases for oncology subtype  
14 [x] adverse reaction to doxorubicin hydrochloride  
15 [x] adverse reaction to estramustine phosphate  
16 malignant ascites  
17 [x] adverse reaction to etoposide  
18 [x] adverse reaction to fluorouracil  
19 adnexal carcinoma  
20 spongioneuroblastoma  
21 nephrotic syndrome with pseudohermaphroditism  
22 drash syndrome  
23 squamous cell carcinoma, metastatic  
24 metastatic squamous cell carcinoma  
25 acquired renal cyst with neoplastic change  
26 acquired renal cyst without neoplastic change  
27 renal involvement in malignant disease  
28 [x] adverse reaction to hydroxyurea  
29 sclerosing stromal tumour  
30 intraductal papillary adenocarcinoma with invasion  
31 infiltrating and papillary adenocarcinoma  
32 infiltrating papillary adenocarcinoma  
33 [x] adverse reaction to lomustine  
34 [x] adverse reaction to melphalan  
35 turban tumour  
36 [x] adverse reaction to mercaptopurine  
37 [x] adverse reaction to methotrexate  
38 uterine fibroid - baby delivered  
39 uterine fibroid affecting obstetric care  
40 uterine fibroids in pregnancy, childbirth and the puerperium  
41 resection of heart tumour  
42 [x] adverse reaction to mitomycin  
43 [x] adverse reaction to mitozantrone  
44 [x] adverse reaction to mustine hydrochloride  
45 clark melanoma level 3  
46 periosteal fibrosarcoma  
47 periosteal sarcoma  
48 epithelioid mesothelioma, malignant  
49 epithelioid mesothelioma  
50 malignant teratoma, trophoblastic



1 trophoblastic malignant teratoma  
2 polypoid squamous cell carcinoma  
3 [x] adverse reaction to plicamycin  
4 [x] adverse reaction to procarbazine  
5 [x] adverse reaction to roxane  
6 haemangioendothelioma  
7 angioendothelioma  
8 kaposiform hemangioendothelioma  
9 kaposiform haemangioendothelioma  
10 ecchondrosis  
11 synovial chondromatosis  
12 glucagonoma, malignant  
13 alpha cell tumor, malignant  
14 alpha cell tumour, malignant  
15 malignant alpha cell tumour  
16 malignant alpha cell tumor  
17 [x] adverse reaction to tioguanine  
18 [x] adverse reaction to thiotepa  
19 labial melanotic macule  
20 [x] adverse reaction to treosulfan  
21 [x] adverse reaction to vinblastine sulphate  
22 [x] adverse reaction to vincristine sulphate  
23 blue naevus, malignant  
24 blue nevus, malignant  
25 malignant blue naevus  
26 malignant blue nevus  
27 mucinous cystadenoma  
28 mucinous cystoma  
29 pseudomucinous cystadenoma  
30 [x]2ndry malignant neoplasm/bladder+oth+unsp urinary organs  
31 [x]2ndry malignant neoplasm/oth+unspec parts/nervous system  
32 [x]2ndry+unspcf malignant neoplasm lymph nodes/multi regions  
33 dedifferentiated liposarcoma  
34 dermatopolymyositis in neoplastic disease  
35 teratocarcinoma  
36 mixed embryonal carcinoma and teratoma  
37 adenocarcinoma with spindle cell metaplasia  
38 excision of tumour of bone  
39 polyp colon  
40 esthesioneuroepithelioma  
41 olfactory neuroepithelioma  
42 spitzoid malignant melanoma  
43 papillary mucinous cystadenocarcinoma  
44 papillary pseudomucinous cystadenocarcinoma  
45 papillary pseudomucinous adenocarcinoma  
46 meningothelial meningioma  
47 granular cell carcinoma  
48 granular cell adenocarcinoma  
49 myoepithelial tumour  
50 kupffer cell sarcoma

1 nevoid basal cell carcinoma syndrome  
2 basal cell carcinoma syndrome  
3 nbccs - nevoid basal cell carcinoma syndrome  
4 ganglioneuroblastoma  
5 [x]antineoplast antimetabs caus adverse eff in therap use  
6 [x]antineoplast natural prod caus adverse eff in therap use  
7 screening for malignant neoplasm of stomach  
8 screening for gastric malignant neoplasm  
9 screening for malignant neoplasm of urinary bladder  
10 bile duct adenocarcinoma  
11 cholangiocellular carcinoma  
12 polygonal cell carcinoma  
13 endometrial stromal sarcoma, high grade  
14 endometrial sarcoma  
15 endometrioid stromal sarcoma, high grade  
16 curettage of tumour of bone nec  
17 excision of tumour of bone nec  
18 phyllodes tumour, borderline  
19 phyllodes tumor  
20 phyllodes tumor, borderline  
21 epithelioma, malignant  
22 epithelioma  
23 malignant epithelioma  
24 curettage of tumour of bone and graft hfq  
25 fibrillary astrocytoma  
26 fibrous astrocytoma  
27 sex cord-stromal tumour  
28 sex cord-stromal tumor  
29 sex cord tumor  
30 gonadal stromal tumor  
31 testicular stromal tumor  
32 ovarian stromal tumor  
33 testicular stromal tumour  
34 ovarian stromal tumour  
35 sex cord tumour  
36 gonadal stromal tumour  
37 sex cord-stromal tumour, no icd-o subtype  
38 sex cord-stromal tumor, no icd-o subtype  
39 sex cord-stromal tumor, no international classification of diseases for oncology subtype  
40 paget's disease, extramammary (except paget's disease of bone)  
41 paget disease, extramammary (except paget disease of bone)  
42 carcinomatous myopathic syndrome  
43 myopathy associated with malignant disease  
44 follicular adenocarcinoma, trabecular  
45 follicular carcinoma, trabecular  
46 follicular adenocarcinoma, moderately differentiated  
47 follicular carcinoma, moderately differentiated  
48 follicular carcinoma - moderately differentiated  
49 follicular carcinoma - trabecular  
50 follicular adenocarcinoma - moderately differentiated

1 sex cord tumour with annular tubules  
2 sex cord tumor with annular tubules  
3 mucous carcinoma  
4 mucinous carcinoma  
5 colloid adenocarcinoma  
6 colloid carcinoma  
7 gelatinous adenocarcinoma  
8 gelatinous carcinoma  
9 muroid adenocarcinoma  
10 muroid carcinoma  
11 mucous adenocarcinoma  
12 pseudomyxoma peritonei with unknown primary site  
13 gangliocytic paraganglioma  
14 seminoma, anaplastic  
15 seminoma with high mitotic index  
16 anaplastic seminoma  
17 tumourlet  
18 tumorlet  
19 giant cell and spindle cell carcinoma  
20 lymphangioliomyomatosis  
21 small cell sarcoma  
22 round cell sarcoma  
23 undifferentiated round cell sarcoma  
24 peripheral neuroectodermal tumor  
25 neuroectodermal tumor  
26 peripheral primitive neuroectodermal tumor  
27 ppnet  
28 neuroectodermal tumour  
29 peripheral primitive neuroectodermal tumour  
30 myofibromatosis  
31 congenital generalized fibromatosis  
32 infantile myofibromatosis  
33 congenital generalised fibromatosis  
34 [x]carcinoma in situ of oth+unspecified male genital organs  
35 [x]carcinoma in situ of other+unspcfd female genital organs  
36 [x]carcinoma in situ of other+unspecified urinary organs  
37 [x]carcinoma in situ of skin of other+unspecified parts/face  
38 gemistocytoma  
39 small cell carcinoma, fusiform cell  
40 small cell carcinoma - fusiform cell  
41 clark melanoma level 4  
42 chondroblastoma, malignant  
43 malignant chondroblastoma  
44 glycogen-rich carcinoma  
45 glycogen-rich clear cell carcinoma  
46 reserve cell carcinoma  
47 round cell carcinoma  
48 scc - small cell carcinoma  
49 endodermal sinus tumor  
50 yolk sac tumor

1 polyvesicular vitelline tumor  
2 orchioblastoma  
3 embryonal carcinoma, infantile  
4 yolk sac tumour  
5 hepatoid yolk sac tumor  
6 polyvesicular vitelline tumour  
7 hepatoid yolk sac tumour  
8 infantile embryonal carcinoma  
9 glioma, malignant, no icd-o subtype  
10 glioma  
11 glioma (except nasal glioma, not neoplastic)  
12 gonocytoma  
13 gby - gonadoblastoma  
14 apudoma  
15 smooth muscle tumor  
16 leiomyomatosis  
17 intravascular leiomyomatosis  
18 leiomyomatosis, no icd-o subtype  
19 leiomyomatosis, no international classification of diseases for oncology subtype  
20 intravenous leiomyomatosis  
21 placental site trophoblastic tumour  
22 placental site trophoblastic tumor  
23 malignant melanoma in giant pigmented naevus  
24 malignant melanoma in giant pigmented nevus  
25 malignant melanoma in congenital melanocytic nevus  
26 malignant melanoma in congenital melanocytic naevus  
27 endometrioid adenoma, borderline malignancy  
28 endometrioid cystadenoma, borderline malignancy  
29 endometrioid tumor of low malignant potential  
30 endometrioid tumour of low malignant potential  
31 atypical proliferative endometrioid tumor  
32 atypical proliferative endometrioid tumour  
33 endometrioid adenoma - borderline malignancy  
34 endometrioid cystadenoma - borderline malignancy  
35 endometrioid tumour, borderline  
36 endometrioid tumor, borderline  
37 aesthesioneuroblastoma  
38 esthesioneuroblastoma  
39 chondroblastic osteosarcoma  
40 nesidioblastoma  
41 dermatofibrosarcoma protuberans  
42 dermatofibrosarcoma, no international classification of diseases for oncology subtype  
43 dermatofibrosarcoma, no icd-o subtype  
44 ewing's tumor  
45 ewing's tumour  
46 ewing sarcoma  
47 brown fat tumour  
48 juvenile granulosa cell tumour  
49 juvenile granulosa cell tumor  
50 lobular carcinoma, noninfiltrating

1  
2 lcis  
3 non-infiltrating lobular carcinoma  
4 lcis - lobular carcinoma in situ  
5 neurilemoma, malignant  
6 neurilemmoma, malignant  
7 neurilemmosarcoma  
8 malignant schwannoma  
9  
10 pleomorphic rhabdomyosarcoma  
11 pleomorphic rhabdomyosarcoma, adult type  
12 carcinomatous peripheral neuropathy  
13 carcinomatous neuropathy  
14 paraneoplastic polyneuropathy  
15 leydig cell tumour, malignant  
16 leydig cell tumor, malignant  
17 interstitial cell tumor, malignant  
18 interstitial cell tumour, malignant  
19 malignant interstitial cell tumour  
20 malignant interstitial cell tumor  
21 malignant leydig cell tumor  
22 [m]papillary neoplasms  
23 [x]dermato(poly)myositis in neoplastic disease ce  
24 [m]ovarian papillary tumour  
25 [m]ovarian serous tumour  
26 [m]testicular stromal tumour  
27 [m]ovarian stromal tumour  
28 [m]fibroxanthosarcoma  
29 [m]sympathogonioma  
30 [m]sympathicogonioma  
31 comedocarcinoma, noninfiltrating  
32 ductal carcinoma in situ, comedo type  
33 dcis, comedo type  
34 non-infiltrating comedocarcinoma  
35 meningioma, malignant  
36 leptomeningeal sarcoma  
37 meningeal sarcoma  
38 meningothelial sarcoma  
39 meningioma, anaplastic  
40 sebaceous epithelioma  
41 telangiectatic osteosarcoma  
42 ayala's disease  
43 pleomorphic xanthoastrocytoma  
44 tumour staging  
45 tnm tumour staging  
46 figo staging of gynaecological malignancy  
47 pseudomucinous adenocarcinoma  
48 pseudomucinous cystadenocarcinoma  
49 mixed parotid tumour  
50 insertion of carmustine wafers in cerebral neoplasm  
51 secondary carcinoma  
52 secondary neoplasm

1 carcinoma of rectum  
2 rectal carcinoma  
3 squamous cell carcinoma of skin  
4 multiple self-healing epithelioma of ferguson-smith  
5 rodent ulcer  
6 prostatic intraepithelial neoplasia  
7 malignant tumour of unknown origin  
8 carcinoma of genitourinary organ  
9 sarcoma of bone and connective tissue  
10 carcinoma of bone, connective tissue, skin and breast  
11 carcinoma of lip, oral cavity and pharynx  
12 carcinoma of respiratory tract and intrathoracic organs  
13 carcinoma of caecum  
14 anal carcinoma  
15 carcinoma common bile duct  
16 malignant neoplasm of carpal bones  
17 malignant neoplasm of metacarpal bones  
18 seminoma of testis  
19 secondary carcinoma of respiratory and/or digestive systems  
20 oligodendroblastoma  
21 secondary carcinoma of other specified sites  
22 carcinoma of other and unspecified sites  
23 carcinoma in situ of ear  
24 sertoli cell carcinoma  
25 water-clear cell adenocarcinoma  
26 water-clear cell carcinoma  
27 hemangioblastoma  
28 angioblastoma  
29 superficial spreading adenocarcinoma  
30 typical carcinoid  
31 carcinoid tumor  
32 carcinoid tumour no icd-o subtype  
33 carcinoid tumor no icd-o subtype  
34 carcinoid  
35 carcinoid tumor no international classification of diseases for oncology subtype  
36 neurofibromatosis  
37 multiple neurofibromatosis  
38 von recklinghausen's disease (except of bone)  
39 recklinghausen's disease (except of bone)  
40 solid carcinoma  
41 solid carcinoma with mucin formation  
42 solid adenocarcinoma with mucin formation  
43 giant cell tumour of soft parts  
44 giant cell tumor of soft parts  
45 giant cell tumour of soft tissue  
46 giant cell tumor of soft tissue  
47 malignant tumour, small cell type  
48 malignant tumor, small cell type  
49 malignant tumor - small cell type  
50 paget disease and infiltrating duct carcinoma of breast

1 infiltrating duct adenocarcinoma  
2 duct cell carcinoma  
3 ductal carcinoma  
4 duct adenocarcinoma  
5 invasive breast carcinoma of no special type  
6 calcifying epithelial odontogenic tumour  
7 pindborg tumour  
8 ceot - calcifying epithelial odontogenic tumour  
9 malignant rhabdoid tumour  
10 rhabdoid sarcoma  
11 rhabdoid tumor  
12 malignant rhabdoid tumor  
13 rhabdoid tumour  
14 melanotic medulloblastoma  
15 mdb - medulloblastoma  
16 medulloblastoma, no icd-o subtype  
17 medulloblastoma, no international classification of diseases for oncology subtype  
18 neoplastic pleural effusion  
19 malignant effusion  
20 pleural effusion due to malignancy  
21 malignant teratoma, undifferentiated  
22 malignant teratoma, anaplastic  
23 malignant teratoma - anaplastic  
24 acinar cell tumour  
25 acinic cell tumor  
26 acinic cell tumour  
27 chondromatosis  
28 cartilage analogue of fibromatosis  
29 cartilage analog of fibromatosis  
30 malignant tumour, giant cell type  
31 malignant tumor, giant cell type  
32 malignant tumour - giant cell type  
33 malignant tumor - giant cell type  
34 [x]follow-up examinat after other treatment for malig neopl  
35 [x]follow-up examinat after unspec treatment for malig neop  
36 mullerian mixed tumor  
37 malignant mixed mullerian tumor  
38 malignant mixed mullerian tumour  
39 [x]fracture of bone in neoplastic diseases ce  
40 cloacogenic carcinoma  
41 haemangiopericytoma, malignant  
42 hemangiopericytoma, malignant  
43 malignant haemangiopericytoma  
44 malignant hemangiopericytoma  
45 [x]glomerular disorders in neoplastic diseases ce  
46 intraepidermal squamous cell carcinoma, bowen's type  
47 bd - bowen's disease  
48 scc - intraepidermal squamous cell carcinoma - bowen's type  
49 bowen disease  
50 [x]hiv dis reslt/oth mal neopl/lymph,h'matopoetc+reltd tissu

1  
2 pheochromocytoma  
3 pheochromocytoma  
4 chromaffin paraganglioma  
5 chromaffin tumor  
6 chromaffinoma  
7  
8 adrenal medullary paraganglioma  
9 chromaffin tumour  
10 adenoid squamous cell carcinoma  
11 pseudoglandular squamous cell carcinoma  
12 squamous cell carcinoma, acantholytic  
13 acantholytic squamous cell carcinoma  
14 neoplasm, malignant (primary)  
15 neoplasm, malignant  
16 blastoma  
17 malignancy  
18 cancer  
19 unclassified tumor, malignant  
20 tumour, malignant  
21 tumor, malignant  
22 unclassified tumour, malignant  
23 malignant neoplasm  
24 malignant tumour morphology  
25 malignant tumor morphology  
26 cancer morphology  
27 malignant neoplasm, primary  
28 unclassified tumor, borderline malignancy  
29 tumor, borderline malignancy  
30 tumour, borderline malignancy  
31 unclassified tumour, borderline malignancy  
32 adenocarcinoid tumor  
33 cystic mesothelioma  
34 intraductal carcinoma, noninfiltrating  
35 intraductal adenocarcinoma, noninfiltrating  
36 intraductal carcinoma  
37 ductal intraepithelial neoplasia 3  
38 ductal carcinoma in situ  
39 din 3  
40 dcis  
41 non-infiltrating intraductal carcinoma  
42 non-infiltrating intraductal adenocarcinoma  
43 intraductal carcinoma, noninfiltrating, no icd-o subtype  
44 intraductal carcinoma, noninfiltrating, no international classification of diseases for oncology subtype  
45 sympatheticoblastoma  
46 central neuroblastoma  
47 nb - neuroblastoma  
48 signet ring cell adenocarcinoma  
49 giant cell sarcoma (except of bone, m-92503)  
50 undifferentiated pleomorphic cell sarcoma  
51 juvenile melanoma  
52 juvenila melanoma  
53  
54  
55  
56  
57  
58  
59  
60



1  
2 alveolar soft part sarcoma  
3 choroid plexus carcinoma  
4 ameloblastoma, malignant  
5 adamantinoma, malignant (except of tibia and long bones, m-92613)  
6 malignant adamantinoma  
7 tumour cells, malignant  
8 tumor cells, malignant  
9 malignant tumor cells  
10 teratoid medulloepithelioma  
11 malignant tumour, fusiform cell type  
12 malignant tumor, fusiform cell type  
13 malignant tumor, spindle cell type  
14 malignant tumour, spindle cell type  
15 malignant tumour - fusiform cell type  
16 malignant tumour - spindle cell type  
17 malignant tumor - spindle cell type  
18 malignant tumor - spindle cell type  
19 malignant tumor - fusiform cell type  
20 pineocytoma  
21 hurthle cell tumour  
22 mesenchymoma, malignant  
23 mixed mesenchymal sarcoma  
24 malignant mesenchymoma  
25 lobular adenocarcinoma  
26 infiltrating lobular carcinoma  
27 mast cell tumor  
28 mast cell tumour  
29 [x]mal neoplasm/connective+soft tissue of trunk,unspecified  
30 ganglioglioma, no icd-o subtype  
31 glioneuroma  
32 neuroastrocytoma  
33 ganglioglioma, no international classification of diseases for oncology subtype  
34 [x]mal neoplasm/overlap les/periph nerv+autonomic nerv system  
35 [x]mal neoplasm/overlap lesion/bone+articular cartilage/limb  
36 [x]mal neoplasm/periph nerves+autonomic nervous system,unspc  
37 verrucous squamous cell carcinoma  
38 verrucous epidermoid carcinoma  
39 warty carcinoma  
40 condylomatous carcinoma  
41 [x]malig neopl, overlap lesion brain & other part of cns  
42 scc - verrucous squamous cell carcinoma  
43 [x]malignant melanoma of other+unspecified parts of face  
44 [x]malignant neopl/overlapping les/resp+intrathoracic organs  
45 [x]malignant neoplasm of eye, brain and other parts of cent  
46 [x]malignant neoplasm of ill-defined, secondary and unspeci  
47 brenner tumour, borderline malignancy  
48 brenner tumor, borderline malignancy  
49 brenner tumor, proliferating  
50 brenner tumour, proliferating  
51 brenner tumour - borderline malignancy  
52 proliferating brenner tumour

1 [x]malignant neoplasm of lip, oral cavity and pharynx  
2 proliferating brenner tumor  
3 brenner tumor - borderline malignancy  
4 borderline brenner tumour  
5 brenner tumour, atypical proliferative  
6 borderline brenner tumor  
7 brenner tumor, atypical proliferative  
8 [x]malignant neoplasm of respiratory and intrathoracic organ  
9 [x]malignant neoplasm-pluriglandular involvement,unspecified  
10 [x]malignant neoplasm/bone+articular cartilage, unspecified  
11 [x]malignant neoplasm/bones+articular cartilage/limb,unspfd  
12 [x]malignant neoplasm/central nervous system, unspecified  
13 [x]malignant neoplasm/connective + soft tissue,unspecified  
14 [x]malignant neoplasm/ill-defined sites within resp system  
15 [x]malignant neoplasm/other and unspecified cranial nerves  
16 [x]malignant neoplasm/other specified female genital organs  
17 [x]malignant neoplasm/other specified male genital organs  
18 [x]malignant neoplasm/overlap lesion/bone+articulr cartilage  
19 [x]malignant neoplasm/overlap lesion/heart,mediastinm+pleura  
20 [x]malignant neoplasm/overlap lesion/other+ill-defined sites  
21 [x]malignant neoplasm/overlapping lesion/feml genital organs  
22 [x]malignant neoplasm/overlapping lesion/male genital organs  
23 [x]malignant neoplasm/peripheral nerves of trunk,unspecified  
24 [x]malignant neoplasm/upper resp tract, part unspecified  
25 [x]malignant neoplasms/independent (primary) multiple sites  
26 [x]malignant neoplasms/independent(primary)multiple sites  
27 [x]malignant neoplasm/ill-defin sites within digestive system  
28 papillary serous cystadenocarcinoma  
29 papillary serous adenocarcinoma  
30 micropapillary serous carcinoma  
31 serous adenocarcinoma  
32 serous carcinoma  
33 [x]mesothelioma of lung  
34 tumour of uterine body affecting obstetric care  
35 tumour of uterine body - baby delivered  
36 monoclonal paraproteinaemia  
37 [x]multiple cranial nerve palsies/neoplastic disease ce  
38 glaucoma due to ocular tumour or cyst  
39 [x]neo/uncertn+unkwn behav/lymph,h'matopetc+rel tiss,unspcf  
40 [x]neoplasm of uncert/unkn behav female genit organs, unspec  
41 [x]nerve root+plexus compressions in neoplastic disease ce  
42 familial vestibular schwannoma  
43 ampullary carcinoma in situ  
44 cancer in situ of anal canal  
45 carcinoma in situ of biliary tract  
46 cancer in situ of urinary bladder  
47 cancer in situ of body of stomach  
48 carcinoma in situ of gastric body  
49 carcinoma in situ of corpus uteri  
50 carcinoma in situ of buccal mucosa

1 carcinoma in situ of cheek mucosa  
2 carcinoma in situ of internal cheek  
3 carcinoma in situ of cecum  
4 carcinoma in situ of cardia  
5 carcinoma in situ of gastric cardia  
6 cancer in situ of cardia of stomach  
7 carcinoma in situ of cervix uteri  
8 cin 3 - cervical intraepithelial neoplasia grade 3  
9 cancer in situ of colon  
10 carcinoma in situ of distal extra hepatic duct  
11 cancer in situ of common bile duct  
12 cancer in situ of cystic duct  
13 cancer in situ of duodenum  
14 carcinoma in situ of esophagus  
15 cancer in situ of esophagus  
16 cancer in situ of oesophagus  
17 carcinoma in situ of ethmoid sinus  
18 cancer in situ of eye  
19 carcinoma in situ of female genital organ  
20 fom - carcinoma in situ of floor of mouth  
21 cancer in situ fundus of stomach  
22 cancer in situ of gastrointestinal tract  
23 carcinoma in situ of gum  
24 carcinoma in situ of gingiva  
25 cancer in situ of gum  
26 carcinoma in situ of hepatic flexure  
27 carcinoma in situ of laryngopharynx  
28 cancer in situ of hypopharynx  
29 cancer in situ of ileum  
30 cancer in situ of jejunum  
31 cancer in situ of larynx  
32 carcinoma in situ of lower third of oesophagus  
33 carcinoma in situ of lower third of esophagus  
34 carcinoma in situ of lower 1/3 esophagus  
35 carcinoma in situ of male genital organ  
36 carcinoma in situ of maxillary antrum  
37 carcinoma in situ of meckel diverticulum  
38 carcinoma in situ of middle third of oesophagus  
39 carcinoma in situ of middle third of esophagus  
40 carcinoma in situ of middle 1/3 esophagus  
41 carcinoma in situ of mouth  
42 cancer in situ of mouth  
43 carcinoma in situ of nasopharyngeal wall  
44 pns - carcinoma in situ of postnasal space  
45 carcinoma in situ of epipharynx  
46 carcinoma in situ of postnasal space  
47 carcinoma situ of oropharynx  
48 carcinoma in situ of mesopharynx  
49 cancer in situ of oropharynx  
50 carcinoma in situ of roof of mouth  
51  
52  
53  
54  
55  
56  
57  
58  
59  
60

1 cancer in situ of pancreas  
2 cancer in situ of penis  
3 cancer in situ of pharynx  
4 cancer in situ of prostate  
5 carcinoma in situ of pylorus  
6 cancer in situ of pylorus  
7 cancer in situ of rectum  
8 carcinoma in situ of skin of face  
9 cancer in situ of skin of face  
10 carcinoma in situ of skin of forehead  
11 cancer in situ skin of lip  
12 carcinoma in situ of skin of lower limb  
13 cancer in situ skin of neck  
14 cancer in situ of skin  
15 carcinoma in situ of sphenoid sinus  
16 congenital sternomastoid torticollis  
17 congenital wry neck  
18 cancer in situ of spleen  
19 carcinoma in situ of thyroid gland  
20 cancer in situ of thyroid  
21 cancer in situ of tongue  
22 severe epithelial dysplasia of trachea  
23 carcinoma in situ of upper third of oesophagus  
24 carcinoma in situ of upper third esophagus  
25 carcinoma in situ of upper third oesophagus  
26 carcinoma in situ of upper third of esophagus  
27 carcinoma in situ of upper 1/3 esophagus  
28 vain - vaginal intraepithelial neoplasia 3  
29 vain iii - vaginal intraepithelial neoplasia grade iii  
30 cancer in situ of vagina  
31 cancer in situ of vulva  
32 other neoplasm screening  
33 malignant melanoma of skin of cheek  
34 malignant melanoma of skin of eyebrow  
35 malignant melanoma of skin of nose  
36 mm - malignant melanoma of skin  
37 cutaneous malignant melanoma  
38 melanoma of skin  
39 primary malignant neoplasm of acromion  
40 primary malignant neoplasm of aortic body  
41 primary malignant neoplasm of areola of female breast  
42 primary malignant neoplasm of areola of male breast  
43 primary malignant neoplasm of broad ligament  
44 primary malignant neoplasm of clavicle  
45 primary malignant neoplasm of coccygeal body  
46 primary malignant neoplasm of common bile duct  
47 primary malignant neoplasm of cuboid  
48 primary malignant neoplasm of cystic duct  
49 primary malignant neoplasm of diaphragm  
50 primary malignant neoplasm of endocervix

1 cancer of endocervix  
2  
3 primary malignant neoplasm of epicardium  
4 primary malignant neoplasm of ethmoid bone  
5 primary malignant neoplasm of exocervix  
6 primary malignant neoplasm of femur  
7 primary malignant neoplasm of fibula  
8 primary malignant neoplasm of frontal bone  
9 primary malignant neoplasm of glomus jugulare  
10 primary malignant neoplasm of great vessels  
11 primary malignant neoplasm of hilus of lung  
12 primary malignant neoplasm of ilium  
13 primary malignant neoplasm of intrathoracic organs  
14 primary malignant neoplasm of ischium  
15 primary malignant neoplasm of kidney  
16 ca - liver cancer  
17 liver cancer  
18 malignant tumor of liver  
19 malignant tumour of liver  
20 primary malignant neoplasm of male breast  
21 primary malignant neoplasm of maxilla  
22 primary malignant neoplasm of nasal bone  
23 primary malignant neoplasm of nipple of female breast  
24 primary malignant neoplasm of nipple of male breast  
25 primary malignant neoplasm of occipital bone  
26 primary malignant neoplasm of paraganglion  
27 primary malignant neoplasm of parietal bone  
28 primary malignant neoplasm of parietal peritoneum  
29 primary malignant neoplasm of patella  
30 primary malignant neoplasm of periadrenal tissue  
31 primary malignant neoplasm of perianal skin  
32 primary malignant neoplasm of pericardium  
33 primary malignant neoplasm of presacral region  
34 primary malignant neoplasm of pubis  
35 primary malignant neoplasm of radius  
36 primary malignant neoplasm of rectum  
37 primary malignant neoplasm of respiratory tract  
38 primary malignant neoplasm of rib  
39 primary malignant neoplasm of sacrococcygeal region  
40 primary malignant neoplasm of scapula  
41 primary malignant neoplasm of sebaceous gland  
42 primary malignant neoplasm of skin of ankle  
43 primary malignant neoplasm of skin of back  
44 primary malignant neoplasm of skin of breast  
45 primary malignant neoplasm of skin of buttock  
46 primary malignant neoplasm of skin of chin  
47 primary malignant neoplasm of skin of eyebrow  
48 primary malignant neoplasm of skin of finger  
49 primary malignant neoplasm of skin of foot  
50 primary malignant neoplasm of skin of forehead  
51 primary malignant neoplasm of skin of groin

1  
2 primary malignant neoplasm of skin of hand  
3 primary malignant neoplasm of skin of hip  
4 primary malignant neoplasm of skin of knee  
5 primary malignant neoplasm of skin of lip  
6 primary malignant neoplasm of skin of neck  
7 primary malignant neoplasm of skin of perineum  
8 primary malignant neoplasm of skin of shoulder  
9 primary malignant neoplasm of skin of thigh  
10 primary malignant neoplasm of skin of toe  
11 primary malignant neoplasm of skin of umbilicus  
12 primary malignant neoplasm of sphenoid bone  
13 primary malignant neoplasm of sternum  
14 primary malignant neoplasm of sweat gland  
15 primary malignant neoplasm of talus  
16 primary malignant neoplasm of temporal bone  
17 primary malignant neoplasm of tibia  
18 primary malignant neoplasm of ulna  
19 primary malignant neoplasm of ventral surface of tongue  
20 primary malignant neoplasm of vomer  
21 primary malignant neoplasm of zygomatic bone  
22 metastatic malignant neoplasm to adrenal gland  
23 suprarenal metastasis  
24 metastasis to adrenal gland  
25 cancer metastatic to adrenal gland  
26 metastatic malignant neoplasm to axillary lymph nodes  
27 metastatic malignant neoplasm to bladder  
28 metastasis to bladder  
29 metastatic tumour to bladder  
30 metastatic tumor to bladder  
31 cancer metastatic to urinary bladder  
32 secondary malignant neoplasm of bone  
33 metastatic malignant neoplasm to bone  
34 metastatic tumour of bone  
35 metastatic tumor of bone  
36 secondary cancer of bone  
37 osseous metastasis  
38 bony metastasis  
39 cancer metastatic to bone  
40 tumour metastatic to bone  
41 tumor metastatic to bone  
42 metastatic malignant neoplasm to brain  
43 secondary cancer of brain  
44 metastasis to brain  
45 cancer metastatic to brain  
46 secondary malignant neoplasm of bronchopulmonary lymph nodes  
47 metastatic malignant neoplasm to bronchopulmonary lymph nodes  
48 metastatic malignant neoplasm to hilar lymph nodes  
49 secondary malignant neoplasm of hilar lymph nodes  
50 secondary malignant neoplasm of cerebrum  
51 metastatic malignant neoplasm to cerebrum  
52

1 metastatic malignant neoplasm to colon  
2 metastatic malignant neoplasm to duodenum  
3 cancer metastatic to duodenum  
4 secondary malignant neoplasm of female breast  
5 metastatic malignant neoplasm to female breast  
6 secondary malignant deposit to breast  
7 metastasis to breast  
8 metastatic malignant neoplasm to gastrointestinal tract  
9 metastasis to gastrointestinal tract  
10 secondary ca gastrointestinal tract  
11 metastatic malignant neoplasm to ileum  
12 secondary malignant neoplasm of iliac lymph nodes  
13 metastatic malignant neoplasm to iliac lymph nodes  
14 cancer metastatic to iliac lymph nodes  
15 secondary malignant neoplasm of infraclavicular lymph nodes  
16 metastatic malignant neoplasm to infraclavicular lymph nodes  
17 secondary malignant neoplasm of intercostal lymph nodes  
18 metastatic malignant neoplasm to intercostal lymph nodes  
19 cancer metastatic to intercostal lymph nodes  
20 secondary malignant neoplasm of intra-abdominal lymph nodes  
21 metastatic malignant neoplasm to intra-abdominal lymph nodes  
22 cancer metastatic to intra-abdominal lymph nodes  
23 secondary malignant neoplasm of intrapelvic lymph nodes  
24 metastatic malignant neoplasm to intrapelvic lymph nodes  
25 cancer metastatic to intrapelvic lymph nodes  
26 secondary malignant neoplasm of intrathoracic lymph nodes  
27 metastatic malignant neoplasm to intrathoracic lymph nodes  
28 cancer metastatic to intrathoracic lymph nodes  
29 metastatic malignant neoplasm to jejunum  
30 metastatic malignant neoplasm to kidney  
31 metastatic tumour in kidney  
32 metastatic tumor in kidney  
33 metastasis to renal parenchyma  
34 secondary renal cancer  
35 renal metastasis  
36 secondary cancer of kidney  
37 cancer metastatic to kidney  
38 secondary malignant neoplasm of large intestine  
39 metastatic malignant neoplasm to large intestine  
40 metastasis to large intestine  
41 cancer metastatic to large intestine  
42 metastatic malignant neoplasm to liver  
43 liver secondary cancer  
44 liver secondaries  
45 secondary malignancy of liver  
46 hepatic metastasis  
47 cancer metastatic to liver  
48 metastatic malignant neoplasm to lung  
49 secondary malignant tumour of lung  
50 secondary malignant tumor of lung

1 pulmonary metastasis  
2 secondary cancer of lung  
3 cancer metastatic to lung  
4 metastatic malignant neoplasm to lymph node  
5 secondary lymph node cancer  
6 cancer metastatic to lymph nodes  
7 secondary malignant neoplasm of lymph nodes of face  
8 metastatic malignant neoplasm to lymph nodes of face  
9 cancer metastatic to lymph nodes of face  
10 secondary malignant neoplasm of lymph nodes of lower limb  
11 metastatic malignant neoplasm to lymph nodes of lower limb  
12 metastasis to lower limb lymph node  
13 cancer metastatic to lymph nodes of lower limb  
14 secondary malignant neoplasm of lymph nodes of multiple sites  
15 metastatic malignant neoplasm to lymph nodes of multiple sites  
16 cancer metastatic to lymph nodes of multiple sites  
17 metastatic malignant neoplasm to lymph nodes of upper limb  
18 metastasis to upper limb lymph node  
19 cancer metastatic to lymph nodes of upper limb  
20 metastatic malignant neoplasm to mediastinal lymph nodes  
21 metastatic malignant neoplasm to mediastinum  
22 secondary malignant tumour of mediastinum  
23 secondary malignant tumor of mediastinum  
24 metastasis to mediastinum  
25 mediastinal metastasis  
26 cancer metastatic to mediastinum  
27 metastatic malignant neoplasm to mesenteric lymph nodes  
28 cancer metastatic to mesenteric lymph nodes  
29 secondary malignant neoplasm of nervous system  
30 metastatic malignant neoplasm to nervous system  
31 metastasis to nervous system  
32 cancer metastatic to nervous system  
33 metastatic malignant neoplasm to obturator lymph nodes  
34 cancer metastatic to obturator lymph nodes  
35 secondary malignant neoplasm of occipital lymph nodes  
36 metastatic malignant neoplasm to occipital lymph nodes  
37 malignant neoplasm of digestive organs and peritoneum  
38 malignant neoplasm of oesophagus nos  
39 malignant neoplasm of colon nos  
40 metastatic malignant neoplasm to ovary  
41 krukentburg tumor  
42 secondary tumor to ovary  
43 ovarian metastasis  
44 malignant neoplasm of upper lobe, bronchus or lung  
45 metastasis to ovary  
46 malignant neoplasm of bronchus or lung nos  
47 secondary cancer of ovary  
48 secondary tumour to ovary  
49 malignant neoplasm of bone and articular cartilage  
50 krukentburg tumour



1 cancer metastatic to ovary  
2 malignant neoplasm of hand bones  
3 malignant neoplasm of short bones of leg  
4 other malignant neoplasm of skin  
5 malignant neoplasm of vulva unspecified  
6 malignant neoplasm of testis nos  
7 disseminated malignancy nos  
8 carcinoma in situ of other and unspecified parts of uterus  
9 secondary malignant neoplasm of parotid lymph nodes  
10 metastatic malignant neoplasm to parotid lymph nodes  
11 secondary malignant neoplasm of pectoral axillary lymph nodes  
12 metastatic malignant neoplasm to pectoral axillary lymph nodes  
13 metastatic malignant neoplasm to penis  
14 [m]adenomatous and adenocarcinomatous polyps of colon  
15 metastatic tumour to penis  
16 [m]ovarian cystic, mucinous and serous neoplasms  
17 metastatic tumor to penis  
18 [m]malignant melanoma nos  
19 metastasis to penis  
20 [m]osteomas and osteosarcomas  
21 [m]glioblastoma nos  
22 [m]neuroblastoma nos  
23 [m]lymphogranuloma, malignant  
24 [x]mesothelioma of other sites  
25 carcinoma of lip  
26 metastatic malignant neoplasm to pleura  
27 secondary malignant tumour of pleura  
28 secondary malignant tumor of pleura  
29 pleural seedling  
30 metastasis to pleura  
31 cancer metastatic to pleura  
32 metastatic malignant neoplasm to popliteal lymph nodes  
33 cancer metastatic to popliteal lymph nodes  
34 metastatic malignant neoplasm to prostate  
35 metastatic tumour to prostate  
36 metastatic tumor to prostate  
37 metastasis to prostate  
38 cancer metastatic to prostate  
39 metastatic malignant neoplasm to rectum  
40 cancer metastatic to rectum  
41 metastatic malignant neoplasm to respiratory tract  
42 cancer metastatic to respiratory tract  
43 metastatic malignant neoplasm to skin of breast  
44 metastatic malignant neoplasm to skin of face  
45 metastatic malignant neoplasm to skin of neck  
46 metastatic malignant neoplasm to skin of trunk  
47 metastatic malignant neoplasm to skin  
48 dermal metastasis  
49 cutaneous metastasis  
50 malignant infiltration of skin

1 skin secondaries  
2 secondary cancer of skin  
3 metastasis to skin  
4 cancer metastatic to skin  
5 metastatic malignant neoplasm to small intestine  
6 metastasis to small intestine  
7 cancer metastatic to small intestine  
8 secondary malignant neoplasm of spinal cord  
9 metastatic malignant neoplasm to spinal cord  
10 secondary malignant neoplasm of submandibular lymph nodes  
11 metastatic malignant neoplasm to submandibular lymph nodes  
12 secondary malignant neoplasm of submental lymph nodes  
13 metastatic malignant neoplasm to submental lymph nodes  
14 secondary malignant neoplasm of superficial inguinal lymph nodes  
15 metastatic malignant neoplasm to superficial inguinal lymph nodes  
16 metastatic malignant neoplasm to testis  
17 metastatic tumour to testis  
18 metastatic tumor to testis  
19 metastasis to testis  
20 metastasis to peritoneum  
21 peritoneal seedling  
22 secondary malignant peritoneal deposit  
23 cancer metastatic to peritoneum  
24 metastatic malignant neoplasm to peritoneum  
25 secondary malignant neoplasm of the retroperitoneum  
26 metastatic malignant neoplasm to the retroperitoneum  
27 metastasis to retroperitoneum  
28 retroperitoneal metastasis  
29 metastatic malignant neoplasm to tongue  
30 secondary malignant neoplasm of tracheobronchial lymph nodes  
31 metastatic malignant neoplasm to tracheobronchial lymph nodes  
32 cancer metastatic to tracheobronchial lymph nodes  
33 metastatic malignant neoplasm to ureter  
34 metastatic tumour to ureter  
35 metastatic tumor to ureter  
36 metastasis to ureter  
37 metastatic malignant neoplasm to urethra  
38 metastatic tumour to urethra  
39 metastatic tumor to urethra  
40 metastasis to urethra  
41 metastatic malignant neoplasm to urinary system  
42 metastasis to urinary tract  
43 cancer metastatic to urinary tract  
44 metastatic malignant neoplasm to uterus  
45 metastasis to uterus  
46 cancer metastatic to uterus  
47 metastatic malignant neoplasm to vagina  
48 secondary tumour to vagina  
49 secondary tumor to vagina  
50 metastasis to vagina

1 cancer metastatic to vagina  
2 metastatic malignant neoplasm to vulva  
3 cancer metastatic to vulva  
4 tumour of false cord  
5 tumor of false cord  
6 [x]oth malignant neoplasm/skin of oth+unspecfd parts of face  
7 [x]oth spcf neo/uncrt+unkwn behav/lymph,h'matopetic+rel tis  
8 tumour of vocal cord  
9 tumor of vocal cord  
10 [x]oth systemic atrophy affecting cns in neoplastic disease ce  
11 malignant neoplasm of lip, oral cavity and pharynx  
12 carcinoma in situ of lip, oral cavity and pharynx  
13 malignant neoplasm of genitourinary organ  
14 malignant neoplasm of other and unspecified sites  
15 secondary malignant neoplasm of other specified sites  
16 [m]papillary and squamous cell neoplasms  
17 carcinoma in situ of liver and biliary system  
18 secondary and unspecified malignant neoplasm of lymph nodes  
19 malignant neoplasm of lower lip, inner aspect  
20 osteoma  
21 [x]other antineoplast drugs caus adverse eff in therap use  
22 [m]borderline mucinous cystadenoma of the ovary  
23 clark's melanoma level  
24 clark melanoma level  
25 malignant melanoma of eye  
26 secondary malignant neoplasm of unknown site  
27 [m]carcinoid tumour, argentaffin, nos  
28 epithelioma basal cell  
29 primary vulval cancer  
30 glaucoma due to ocular cyst  
31 osteitis deformans - paget's disease of the bone  
32 [x]other myasthenic syndromes in neoplastic disease ce  
33 dermatofibrosarcoma protuberans  
34 vaginal intraepithelial neoplasia grade 1  
35 mild vaginal dysplasia  
36 vaginal intraepithelial neoplasia grade 2  
37 moderate vaginal dysplasia  
38 vulval intraepithelial neoplasia grade 1  
39 vulval intraepithelial neoplasia grade 2  
40 vulval intraepithelial neoplasia grade 3  
41 monoclonal gammopathy of uncertain significance  
42 tumour lysis syndrome  
43 maltoma  
44 pancoast's syndrome  
45 tumor  
46 tumour  
47 overlapping malignant neoplasm of skin  
48 melanoma in situ of skin (clinical)  
49 ism - in situ melanoma of skin  
50 in situ malignant melanoma of skin

1  
2 ismm - in situ malignant melanoma of skin  
3 in situ melanoma of skin  
4 melanoma in situ of ear  
5 overlapping malignant neoplasm of bone and articular cartilage  
6 overlapping malignant neoplasm of bone and articular cartilage of limbs  
7 cancer in situ  
8 overlapping malignant neoplasm of ill-defined site  
9 overlapping malignant neoplasm of nasopharynx  
10 overlapping malignant neoplasm of nasopharyngeal wall  
11 overlapping malignant neoplasm of hypopharynx  
12 overlapping malignant neoplasm of larynx  
13 overlapping malignant neoplasm of bronchus and lung  
14 malignant mesothelioma  
15 malignant mesothelioma of pericardium  
16 overlapping malignant neoplasm of heart, mediastinum and pleura  
17 epidemic kaposi's sarcoma  
18 ks - kaposi's sarcoma  
19 kaposi's sarcoma  
20 kaposi sarcoma  
21 kaposi sarcoma of skin  
22 kaposi sarcoma of palate  
23 kaposi sarcoma of lymph nodes  
24 kaposi sarcoma of multiple organs  
25 necrotizing sialometaplasia  
26 overlapping malignant neoplasm of tongue  
27 overlapping malignant neoplasm of major salivary gland  
28 cancer major salivary glands contiguous  
29 overlapping malignant neoplasm of floor of mouth  
30 cancer of the floor of mouth, overlapping sites  
31 overlapping malignant neoplasm of oesophagus  
32 overlapping malignant neoplasm of esophagus  
33 malignant neoplasm, overlapping lesion of esophagus  
34 overlapping malignant neoplasm of stomach  
35 cancer of the stomach, overlapping sites  
36 overlapping malignant neoplasm of small intestine  
37 cancer of the small intestine, overlapping sites  
38 hepatocarcinoma  
39 malignant hepatoma  
40 hcc - hepatocellular carcinoma  
41 lcc - liver cell carcinoma  
42 liver carcinoma  
43 hepatoblastoma  
44 angiosarcoma of liver  
45 overlapping malignant neoplasm of biliary tract  
46 overlapping malignant neoplasm of pancreas  
47 cancer of the pancreas, overlapping sites  
48 malignant mesothelioma of peritoneum  
49 cancer of the peritoneum, mesothelioma  
50 overlapping malignant neoplasm of male genital organs  
51 overlapping malignant neoplasm of penis

1 cancer of penis, overlapping sites  
2 overlapping malignant neoplasm of female genital organs  
3 cancer of the brain, overlapping sites  
4 overlapping malignant neoplasm of peripheral nerves and autonomic nervous system  
5 overlapping malignant neoplasm of eye and adnexa (primary)  
6 overlapping malignant neoplasm of eye and adnexa, primary  
7 cancer of the eye and adnexa, overlapping sites  
8 lymphoblastoma  
9 monoclonal gammopathy  
10 histiocytic sarcoma (clinical)  
11 vaquez's disease  
12 osler-vaquez syndrome  
13 osler's disease  
14 overlapping malignant neoplasm of palatine tonsil  
15 [x]personl hist/oth mal neop/lymphd,h'matopoietc+relat tissu  
16 transitional cell carcinoma, spindle cell  
17 transitional cell carcinoma, sarcomatoid  
18 transitional cell carcinoma - spindle cell  
19 bronchiolo-alveolar adenocarcinoma  
20 bronchiolo-alveolar carcinoma  
21 alveolar cell carcinoma  
22 bronchiolar carcinoma  
23 bronchiolar adenocarcinoma  
24 pseudomyxoma peritonei  
25 carcinosarcoma, embryonal  
26 embryonal carcinosarcoma  
27 [x]polyneuropathy in neoplastic disease ce  
28 cervical intraepithelial neoplasia  
29 [x]renal tubulo-interstitial disorders/neoplastic diseases ce  
30 cervical intraepithelial neoplasia grade i  
31 mild cervical dysplasia  
32 moderate cervical dysplasia  
33 cervical intraepithelial neoplasia grade ii  
34 oestrogens in malignant diseases  
35 adnexal and/or skin appendage neoplasm  
36 cystic, mucinous and/or serous neoplasm  
37 ductal, lobular and/or medullary neoplasm  
38 specialised gonadal neoplasm  
39 paraganglioma and/or glomus tumour  
40 paraganglioma and/or glomus tumor  
41 naevus and/or melanoma  
42 nevus and/or melanoma  
43 soft tissue tumour and/or sarcoma  
44 soft tissue tumor and/or sarcoma  
45 soft tissue tumour of fibrous differentiation  
46 soft tissue tumor of fibrous differentiation  
47 adipocytic neoplasm  
48 soft tissue tumour of adipose differentiation  
49 soft tissue tumor of adipose differentiation  
50 soft tissue tumour of muscle differentiation  
51 soft tissue tumor of muscle differentiation  
52 complex mixed and/or stromal neoplasm

1  
2 synovial like neoplasm  
3 blood vessel tumour  
4 osseous and/or chondromatous neoplasm  
5 giant cell tumour  
6 bone tumour  
7 bone tumor  
8 neurofibromas  
9  
10 granular cell tumour and/or alveolar soft part sarcoma  
11 granular cell tumor and/or alveolar soft part sarcoma  
12 [x]secondary malignant neoplasm/oth+unspc respiratory organs  
13 [x]secondary malignant neoplasm/oth+unspcfd digestive organs  
14 progestogens in malignant disease  
15 malignant mast cell tumour (clinical)  
16 malignant mast cell tumor (clinical)  
17 mast cell sarcoma  
18 malignant mast cell tumour  
19 malignant mast cell tumor  
20 ovarian mature cystic teratoma  
21 neoplasm of endometrium  
22 cutaneous tumour  
23 tumour of skin  
24 skin tumour  
25 cutaneous tumor  
26 skin tumor  
27 tumor of skin  
28 neoplasm of sweat gland  
29 tumour of skin with eccrine differentiation  
30 tumor of skin with eccrine differentiation  
31 neoplasm of stomach  
32 tumor of stomach  
33 neoplasm of large intestine  
34 tumour of large intestine  
35 tumor of large intestine  
36 neoplasm of biliary tract  
37 tumor of biliary tract  
38 tumour of biliary tract  
39 neoplasm of pancreas  
40 tumor of pancreas  
41 tumour of pancreas  
42 neoplasm of kidney  
43 renal tumour  
44 tumour of kidney  
45 tumor of kidney  
46 renal tumor  
47 tumour of urinary bladder  
48 tumor of urinary bladder  
49 ngb - new growth of bladder  
50 tumour of breast  
51 breast tumour  
52 breast tumor

1 tumor of breast  
2 vestibular schwannoma  
3 acoustic neurilemmoma  
4 acoustic schwannoma  
5 neoplasm of adrenal gland  
6 adrenal tumour  
7 tumour of adrenal gland  
8 adrenal tumor  
9 tumor of adrenal gland  
10 tumor of adrenal cortex  
11 tumour of adrenal cortex  
12 neoplasm of pituitary gland  
13 pituitary tumour  
14 tumour of pituitary gland  
15 pituitary tumor  
16 tumor of pituitary gland  
17 histiocytic necrotising lymphadenitis  
18 histiocytic necrotizing lymphadenitis  
19 melanoma in situ by body site (clinical)  
20 in situ neoplasm (morphology)  
21 in situ neoplasm  
22 basal cell neoplasm (morphology)  
23 basal cell neoplasm  
24 mucoepidermoid neoplasm (morphology)  
25 mucoepidermoid neoplasm  
26 mesonephric neoplasm (morphology)  
27 mesonephric neoplasm  
28 meningeal neoplasm (morphology)  
29 meningeal-derived tumour  
30 meningeal neoplasm  
31 mast cell neoplasm  
32 metastatic neoplasm (disease)  
33 ca - secondary cancer  
34 metastases  
35 metastatic neoplasm  
36 secondaries  
37 secondary cancer  
38 metastatic malignant disease  
39 secondary tumor  
40 tumor metastasis  
41 secondary malignant deposit  
42 secondary tumour  
43 tumour metastasis  
44 metastatic cancer  
45 accid cut,puncture,perf,h'ge - aspirate fluid/tiss, cath nos  
46 accid cut,puncture,perf,h'ge - injection or vaccination nos  
47 histiocytic neoplasm (morphology)  
48 histiocytic neoplasm  
49 dysmyelopoietic syndrome  
50 accid cut,puncture,perf,h'ge - other perfusion

1  
2 pituitary carcinoma  
3 serous surface papillary tumour of borderline malignancy  
4 endometrial stromal sarcoma, low grade  
5 stromal myosis  
6 stromal endometriosis  
7 endometrial stromatosis  
8 endometrioid stromal sarcoma, low grade  
9 nonlipid reticuloendotheliosis [obs]  
10 histiocytic sarcoma  
11 papillary ependymoma  
12 rars  
13 serous cystadenoma, borderline malignancy  
14 serous tumor of low malignant potential  
15 atypical proliferating serous tumor  
16 atypical proliferating serous tumour  
17 serous tumour of low malignant potential  
18 serous borderline tumor  
19 serous tumor, atypical proliferative  
20 serous borderline tumour  
21 serous tumour, atypical proliferative  
22 papillary cystadenoma, borderline malignancy  
23 serous papillary cystic tumour of borderline malignancy  
24 papillary serous tumor of low malignant potential  
25 papillary serous cystadenoma, borderline malignancy  
26 atypical proliferative papillary serous tumor  
27 serous papillary cystic tumor of borderline malignancy  
28 papillary serous tumour of low malignant potential  
29 atypical proliferative papillary serous tumour  
30 mucinous cystic tumour of borderline malignancy  
31 pseudomucinous cystadenoma, borderline malignancy  
32 mucinous tumor of low malignant potential  
33 mucinous cystadenoma, borderline malignancy  
34 atypical proliferative mucinous tumor  
35 mucinous cystic tumor of borderline malignancy  
36 atypical proliferative mucinous tumour  
37 mucinous tumour of low malignant potential  
38 pseudomucinous cystadenoma - borderline malignancy  
39 mucinous borderline tumour  
40 mucinous borderline tumor  
41 papillary mucinous tumor of low malignant potential  
42 papillary mucinous tumour of low malignant potential  
43 spongioblastoma [obs]  
44 piloid astrocytoma  
45 juvenile astrocytoma  
46 spongioblastoma  
47 alpha cell tumour  
48 thymoma, no icd-o subtype  
49 thymoma, no international classification of diseases for oncology subtype  
50 central neurocytoma  
51 neurolipocytoma  
52



1 medullocytoma  
2 lipomatous medulloblastoma  
3 central neurocytoma - histology  
4 villous papilloma  
5 juxtglomerular tumour  
6 reninoma  
7 juxtglomerular tumor  
8 ultimobranhial thyroid tumour  
9 ultimobranhial thyroid tumor  
10 parafollicular cell carcinoma  
11 c cell carcinoma  
12 parosteal osteosarcoma  
13 juxtacortical osteosarcoma  
14 eosinophilic granuloma (clinical)  
15 eosinophilic xanthomatous granuloma  
16 pheochromocytoma  
17 osteoma  
18 accidental cut,puncture,perf,h'ge - puncture procedure nos  
19 accidental cut,puncture,perf,h'ge during catheterisation nos  
20 basal cell carcinoma - morpheic  
21 morpheaform basal cell carcinoma  
22 carcinomatosis  
23 metaplasia of trigone  
24 malignant neoplasm of epiglottis nos  
25 metastatic calcification  
26 malignant neoplasm of lip, unspecified  
27 malignant melanoma of back  
28 primary malignant neoplasm of unknown site  
29 malignant neoplasm of canthus  
30 malignant neoplasm of pinna nec  
31 malignant neoplasm of skin of scapular region  
32 squamous metaplasia of lung  
33 malignant melanoma of chest wall  
34 malignant neoplasm of upper eyelid  
35 malignant neoplasm of lower eyelid  
36 [m]tibial adamantinoma  
37 seminoma of undescended testis  
38 seminoma of descended testis  
39 local recurrence of malignant tumour of breast  
40 local recurrence of malignant tumour of urinary bladder  
41 melanoma in situ of back of hand  
42 hereditary nonpolyposis colon cancer  
43 paget's disease of bone  
44 melanoma in situ of back  
45 pain from metastases  
46 severe dyskaryosis on cervical smear cannot exclude invasive carcinoma  
47 cannot exclude glandular neoplasia on cervical smear  
48 screening for malignant neoplasm of cervix not wanted  
49 cancer of cervix screening not wanted  
50 cancer cervix screening - wanted

1 cancer cervix screening - not needed  
2 cancer cervix screening - up-to-date  
3 cancer cervix screening - not reached  
4 cancer cervix screen-no result yet  
5 cancer cervix screening and fee claim  
6 screening for malignant neoplasm of urinary system  
7 urinary neoplasm screening  
8 screening for bladder tumour  
9 cystoscopy and laser destruction of bladder lesion  
10 endoscopic destruction of bladder tumor by laser  
11 nonobstetrical perineoplasty  
12 patient on regional cancer register  
13 priority cancer referral  
14 megakaryocytic hypoplasia  
15 malignant neoplasm of descended testis nos  
16 lgv - lymphogranuloma venereum  
17 lymphogranuloma inguinale  
18 malignant tumour of oral aspect of upper lip  
19 malignant tumour of inner aspect of upper lip  
20 malignant tumour of buccal aspect of upper lip  
21 malig tumour of mucosa of upper lip  
22 malignant tumor of upper labial mucosa  
23 malig tumor of mucosa of upper lip  
24 malignant tumor of buccal aspect of upper lip  
25 malignant tumor of inner aspect of upper lip  
26 malignant tumor of oral aspect of upper lip  
27 malignant tumour of fraenum of upper lip  
28 malignant tumor of frenum of upper lip  
29 malignant tumour of fraenum of lower lip  
30 malignant tumor of frenum of lower lip  
31 malignant tumour of labial mucosa  
32 malignant tumor of labial mucosa  
33 malignant tumor of buccal aspect of lip  
34 malignant tumor of mucosa of lip  
35 malignant tumor of oral aspect of lip  
36 malignant tumor of inner aspect of lip  
37 malignant tumour of inner aspect of lip  
38 malignant tumour of buccal aspect of lip  
39 malignant tumour of oral aspect of lip  
40 malignant tumour of mucosa of lip  
41 malignant tumour of anterior two-thirds of tongue - dorsal surface  
42 malignant tumor of anterior two-thirds of tongue - dorsal surface  
43 malignant tumour of anterior two-thirds of tongue - ventral surface  
44 malignant tumor of anterior two-thirds of tongue - ventral surface  
45 malignant tumour of fraenum linguae  
46 malignant tumor of frenum linguae  
47 malignant tumour of junctional zone of tongue  
48 malignant tumor of junctional zone of tongue  
49 malignant tumour of anterior floor of mouth  
50 malignant tumor of anterior floor of mouth

1 malignant tumour of lateral floor of mouth  
2 malignant tumor of lateral floor of mouth  
3 malignant tumor of vestibule of mouth  
4 malignant tumour of upper buccal sulcus  
5 malignant tumor of upper buccal sulcus  
6 malignant tumour of lower buccal sulcus  
7 malignant tumor of lower buccal sulcus  
8 malignant tumour of upper labial sulcus  
9 malignant tumor of upper labial sulcus  
10 malignant tumour of lower labial sulcus  
11 malignant tumor of lower labial sulcus  
12 malignant tumour of tonsillar pillar  
13 malignant tumor of palatopharyngeal arch  
14 malignant tumour of posterior tonsillar pillar  
15 malignant tumor of pharyngopalatine arch  
16 malignant tumour of posterior faucial pillar  
17 malignant tumor of tonsillar pillar  
18 malignant tumor of palatopharyngeal arch  
19 malignant tumor of pharyngopalatine arch  
20 malignant tumor of posterior faucial pillar  
21 malignant tumor of posterior tonsillar pillar  
22 malignant tumour of glossoepiglottic fold  
23 malignant tumor of glossoepiglottic fold  
24 malignant tumour of posterior wall of oropharynx  
25 malignant tumor of posterior wall of oropharynx  
26 malignant tumor of epipharynx  
27 malignant tumor of postnasal space  
28 cancer of nasopharynx  
29 ca - cancer of nasopharynx  
30 malignant tumour of epipharynx  
31 malignant tumour of postnasal space  
32 malignant tumor of nasopharynx  
33 malignant tumor of posterior wall of nasopharynx  
34 malignant tumour of adenoid  
35 malignant tumor of adenoid  
36 malignant tumor of nasopharyngeal tonsil  
37 malignant tumor of pharyngeal tonsil  
38 malignant tumour of pharyngeal tonsil  
39 malignant tumour of nasopharyngeal tonsil  
40 malignant tumour of pharyngeal recess  
41 malignant tumor of fossa of rosenmuller  
42 malignant tumor of pharyngeal recess  
43 malignant tumor of fossa of rosenmuller  
44 malignant tumour of opening of auditory tube  
45 malignant tumor of opening of auditory tube  
46 malignant tumor of anterior wall of nasopharynx  
47 malignant tumour of nasopharyngeal soft palate surface  
48 malignant tumor of nasopharyngeal soft palate surface  
49 malignant tumour aryepiglottic fold - hypopharyngeal aspect  
50 malignant tumor aryepiglottic fold - hypopharyngeal aspect  
51  
52  
53  
54  
55  
56  
57  
58  
59  
60

1 malignant tumour of waldeyer's ring  
2 malignant tumor of waldeyer's ring  
3 malignant tumor of waldeyer ring  
4 malignant tumour of cervical part of oesophagus  
5 malignant tumor of cervical part of esophagus  
6 malignant neoplasm of cervical esophagus  
7 malignant tumour of thoracic part of oesophagus  
8 malignant neoplasm of thoracic esophagus  
9 malignant tumor of thoracic part of esophagus  
10 malignant tumour of abdominal part of oesophagus  
11 malignant tumor of abdominal part of esophagus  
12 malignant neoplasm of abdominal esophagus  
13 malignant tumour of upper third of oesophagus  
14 malignant neoplasm of upper third of esophagus  
15 malignant tumor of upper third of esophagus  
16 ca upper third esophagus  
17 malignant tumour of middle third of oesophagus  
18 malignant tumor of middle third of esophagus  
19 malignant neoplasm of middle third of esophagus  
20 ca middle third esophagus  
21 malignant tumour of lower third of oesophagus  
22 malignant neoplasm of lower third of esophagus  
23 malignant tumor of lower third of esophagus  
24 ca lower third esophagus  
25 malignant tumour of cardia  
26 malignant tumor of cardia  
27 malignant neoplasm of cardio-esophageal junction of stomach  
28 malignant neoplasm of gastro-esophageal junction  
29 malignant neoplasm of cardioesophageal junction of stomach  
30 malignant tumour of pylorus  
31 malignant tumor of pylorus  
32 eosinophilic granuloma  
33 malignant tumour of pyloric antrum  
34 malignant tumor of pyloric antrum  
35 malignant tumour of fundus of stomach  
36 malignant tumor of fundus of stomach  
37 malignant tumour of body of stomach  
38 malignant tumor of body of stomach  
39 malignant tumour of meckel's diverticulum  
40 malignant tumor of meckel's diverticulum  
41 malignant tumor of meckel diverticulum  
42 ca intrahepatic bile ducts  
43 intrahepatic bile duct cancer  
44 malignant tumour of body of pancreas  
45 malignant tumor of body of pancreas  
46 ca body of pancreas  
47 malignant tumour of tail of pancreas  
48 malignant tumor of tail of pancreas  
49 ca tail of pancreas  
50 malignant tumour of pancreatic duct  
51

1 malignant tumor of pancreatic duct  
2 malignant islet cell tumour  
3 malignant islet cell tumor  
4 malignant tumor of peritoneum and retroperitoneum  
5 malignant neoplasm of retrocecal tissue  
6 malignant neoplasm of mesocecum  
7 malignant neoplasm of nasal turbinate  
8 malignant tumour of nasal vestibule  
9 malignant tumor of nasal vestibule  
10 malignant tumour of eustachian tube  
11 malignant tumor of eustachian tube  
12 malignant tumor of auditory tube  
13 malignant tumour of auditory tube  
14 malignant tumour of tympanic cavity  
15 malignant tumor of tympanic cavity  
16 malignant tumour of tympanic antrum  
17 malignant tumor of tympanic antrum  
18 malignant tumour of glottis  
19 malignant tumor of glottis  
20 malignant tumour of supraglottis  
21 malignant tumor of supraglottis  
22 malignant neoplasm of right middle lobe of lung  
23 malignant neoplasm of ribs and/or sternum and/or clavicle  
24 malignant neoplasm of costovertebral joint  
25 malignant neoplasm of navicular bone of hand  
26 malignant neoplasm of trapezial bone  
27 malignant neoplasm of connective and soft tissue of forearm  
28 malignant neoplasm, overlapping lesion of connective and soft tissue  
29 kaposi's sarcoma of soft tissues  
30 kaposi sarcoma of soft tissue  
31 malignant melanoma of ear and/or external auditory canal  
32 malignant melanoma of ear and/or external auricular canal  
33 malignant melanoma of forearm  
34 malignant neoplasm of skin of ear and external auditory canal  
35 malignant neoplasm of scalp and/or skin of neck  
36 malignant neoplasm of skin of scalp  
37 malignant neoplasm of skin of forearm  
38 chorioepithelioma  
39 chorionepithelioma  
40 malignant neoplasm of gartner duct  
41 malignant tumor of undescended testis  
42 cancer of undescended testis  
43 malignant tumour of retained testis  
44 malignant tumor of retained testis  
45 malignant tumour of ectopic testis  
46 cancer of ectopic testis  
47 malignant tumor of ectopic testis  
48 malignant tumour of body of penis  
49 malignant tumour of shaft of penis  
50 malignant tumor of body of penis

1 cancer of body of penis  
2 malignant tumor of shaft of penis  
3 malignant tumour of seminal vesicle  
4 malignant tumor of seminal vesicle  
5 malignant tumour of tunica vaginalis  
6 malignant tumor of tunica vaginalis  
7 malignant tumour of trigone of urinary bladder  
8 malignant tumor of trigone of urinary bladder  
9 malignant tumour of trigone of bladder  
10 malignant tumor of trigone of bladder  
11 malignant tumour of vault of bladder  
12 malignant tumor of bladder dome  
13 malignant neoplasm of vault of bladder  
14 malignant tumor of bladder dome  
15 malignant tumour of vault of bladder  
16 malignant tumor of vault of bladder  
17 malignant tumour of bladder neck  
18 malignant tumor of bladder neck  
19 malignant tumour of ureteric orifice  
20 malignant tumor of ureteric orifice  
21 overlapping malignant neoplasm of urinary bladder  
22 overlapping malignant neoplasm of bladder  
23 malignant tumour of kidney parenchyma  
24 malignant tumor of kidney parenchyma  
25 malignant tumour of renal calyx  
26 malignant neoplasm of renal calyx  
27 malignant tumor of renal calyx  
28 malignant tumour of pelviureteric junction  
29 malignant tumor of pelviureteric junction  
30 malignant neoplasm of pelviureteric junction  
31 malignant tumour of ciliary body  
32 malignant tumor of ciliary body  
33 malignant tumour of iris  
34 malignant tumor of iris  
35 malignant tumour of lacrimal gland  
36 malignant tumor of lacrimal gland  
37 malignant neoplasm of lacrimal duct  
38 malignant tumour of hypothalamus  
39 malignant tumor of hypothalamus  
40 malignant tumour of choroid plexus  
41 malignant tumor of choroid plexus  
42 malignant tumor of cranial nerve  
43 peripheral nerve cancer, thorax  
44 malignant tumour of craniopharyngeal duct  
45 malignant tumor of craniopharyngeal duct  
46 malignant tumour of thorax  
47 malignant tumor of thorax  
48 malignant tumor of abdomen  
49 malignant tumour of abdomen  
50 metastatic malignant neoplasm to uterine cervix  
51 metastatic malignant neoplasm to cervix uteri  
52

1 secondary malignant neoplasm of uterine cervix  
2 cancer metastatic to cervix  
3 secondary malignant neoplasm of epididymis and vas deferens  
4 malignant mast cell tumors  
5 carcinoma in situ of splenic flexure  
6 carcinoma in situ of carina  
7 non-invasive carcinoma of breast  
8 carcinoid tumour - morphology  
9 carcinoid tumor  
10 carcinoid  
11 carcinoid tumour  
12 carcinoid tumor - morphology  
13 dermoid cyst with secondary tumour  
14 dermoid cyst with malignant transformation  
15 dermoid cyst with secondary tumor  
16 choriocarcinoma combined with teratoma  
17 pinealoma - morphology  
18 primitive polar spongioblastoma  
19 monstrocellular sarcoma  
20 reticulum cell sarcoma morphology  
21 diencephalic syndrome secondary to tumor  
22 paraneoplastic cerebellar degeneration  
23 myasthenic syndrome due to another disorder  
24 non-neoplastic nevus  
25 paget's disease of humerus  
26 paget's disease of skull  
27 brown tumor of hyperparathyroidism  
28 malignant neoplasm of mesentery  
29 malignant neoplasm of omentum  
30 malignant neoplasm of labia majora  
31 malignant neoplasm of labia minora  
32 malignant neoplasm of frontal lobe  
33 malignant neoplasm of temporal lobe  
34 malignant neoplasm of parietal lobe  
35 malignant neoplasm of occipital lobe  
36 malignant neoplasm of cerebral ventricles  
37 malignant neoplasm of cerebral meninges  
38 malignant neoplasm of spinal meninges  
39 malignant neoplasm of cauda equina  
40 macrodactyly of fingers- fatty nerve tumour  
41 macrodactyly of toes - fatty nerve tumour  
42 cancer phobia  
43 adverse reaction caused by antineoplastic antibiotics  
44 antineoplastic antibiotic poisoning  
45 bowel cancer screening programme  
46 malignant tumor of eyelid  
47 malignant neoplasm of eyelid  
48 wilms' tumor and nephrotic syndrome with pseudohermaphroditism  
49 carcinoma in situ of cheek  
50 carcinoma in situ of vocal fold - glottis

1 carcinoma in situ of oral cavity  
2 carcinoma in situ of pyloric canal  
3 vulval intraepithelial neoplasia  
4 tumor of endocrine pancreas  
5 pancreatic endocrine tumour  
6 pancreatic endocrine tumor  
7 secondary malignant neoplasm of breast  
8 secondary cancer of the vulva  
9 squamous metaplasia of cervix  
10 multiple endocrine neoplasia, type 1  
11 dermatomyositis with malignant disease  
12 did not attend bowel cancer screening programme nurse clinic  
13 bowel cancer screening programme administration  
14 bowel cancer screening declined  
15 did not attend bowel cancer screening  
16 bowel cancer detected by national screening programme  
17 patient given advice about bowel cancer  
18 breast neoplasm screen abnorm  
19 breast neoplasm screen nos  
20 ca female breast  
21 ca-in-situ of g.i. tract  
22 tumour embolus  
23 tumour embolism  
24 tumor embolus  
25 tumor embolism  
26 cin iii - cervical intraepithelial neoplasia grade iii with severe dysplasia  
27 delta cell tumour  
28 intravascular bronchial alveolar tumour  
29 intravascular bronchial alveolar tumor  
30 sympathicoblastoma  
31 pigmented schwannoma  
32 melanotic schwannoma  
33 cancers  
34 congenital sternomastoid tumor  
35 tumor staging  
36 tnm tumour staging system  
37 tnm tumor staging  
38 tnm tumor staging system  
39 tumor-node-metastasis (tnm) tumor staging system  
40 tumor-node-metastasis (tnm) tumour staging system  
41 figo staging system of gynaecological malignancy  
42 federation internationale de gynecologie et d'obstetrique staging of gynaecological malignancy  
43 figo staging of gynecological malignancy  
44 federation internationale de gynecologie et d'obstetrique staging of gynecological malignancy  
45 figo staging system of gynecological malignancy  
46 international federation of gynaecology and obstetrics (figo) staging system of gynaecological malignancy  
47 international federation of gynecology and obstetrics staging system of gynecological malignancy  
48 malignant tumor of anterior pillar of fauces  
49 malignant tumour of anterior faucial pillar  
50 malignant tumour of anterior tonsillar pillar



1 malignant tumour of palatoglossal arch  
2 malignant tumor of palatoglossal arch  
3 malignant tumor of anterior tonsillar pillar  
4 malignant tumor of anterior faucial pillar  
5 mixed parotid tumor  
6 malignant tumor of posterior margin of nasal septum and choanae  
7 adenocarcinoma of rectum  
8 carcinoid tumor of lung  
9 small cell carcinoma of lung  
10 sclc - small cell lung cancer  
11 epidermoid carcinoma of lung  
12 scc - squamous cell carcinoma of lung  
13 nsccl - non-small cell lung cancer  
14 scc - cutaneous squamous cell carcinoma  
15 cutaneous squamous cell carcinoma  
16 scc - squamous cell carcinoma of skin  
17 spinous cell carcinoma  
18 squamous cell carcinoma in situ of skin  
19 iec - intraepidermal carcinoma of skin  
20 scc - squamous cell carcinoma in situ of skin  
21 intraepidermal carcinoma of skin  
22 cancer in situ skin, squamous cell  
23 ferguson-smith tumor  
24 ferguson-smith tumour  
25 basalioma  
26 bcc - basal cell carcinoma of skin  
27 ru - rodent ulcer  
28 cancer of skin, basal cell  
29 fammm - familial atypical mole malignant melanoma syndrome  
30 familial atypical mole malignant melanoma syndrome  
31 malignant tumour of breast  
32 malignant tumor of breast  
33 breast cancer  
34 ca - breast cancer  
35 malignant neoplasm of breast  
36 carcinoma gallbladder  
37 pin - prostatic intraepithelial neoplasia  
38 intracranial tumour  
39 ict - intracranial tumour  
40 bt - brain tumour  
41 brain tumour  
42 intracranial neoplasm  
43 carcinoma in situ of biliary system  
44 malignant tumour of acoustic vestibular nerve  
45 malignant tumor of acoustic vestibular nerve  
46 iris melanoma  
47 malignant tumor of unknown origin  
48 malignant tumor - unknown primary  
49 ukp - malignant tumor - unknown primary  
50 malignant tumour - unknown primary

1 ukp - malignant tumour - unknown primary  
2 ca - cancer of unknown origin  
3 metastasis - unknown primary  
4 cancer - unknown origin  
5 malignant tumour of head and neck  
6 malignant tumour of head and/or neck  
7 malignant tumor of head and/or neck  
8 carcinoma in situ of digestive organs  
9 carcinoma of lip, oral cavity and/or pharynx  
10 malignant tumor of digestive organ  
11 carcinoma of cecum  
12 angioendotheliomatosis  
13 malignant angioendotheliomatosis  
14 carcinoma in situ of urinary tract  
15 carcinoma in situ of gall bladder  
16 carcinoma in situ of gums  
17 carcinoma in situ of nasal sinuses  
18 carcinoma in situ of other specified part respiratory system  
19 carcinoma in situ of salivary glands  
20 carcinoma in situ of skin of leg  
21 carcinoma in situ of skin of other parts of face  
22 carcinoma in situ of skin of other parts of face nos  
23 carcinoma in situ of specified parts respiratory system nos  
24 carcinoma in situ other and unspecified female genital organ  
25 carcinoma in situ other and unspecified male genital organs  
26 carcinoma in situ other and unspecified small intestine nos  
27 carcinoma in situ skin of ear and external auricular canal  
28 carcinoma in situ skin of ear/external auricular canal nos  
29 carcinoma of digestive organs and peritoneum  
30 cerebral metastasis  
31 cerebral tumour - malignant  
32 cervical carcinoma (uterus)  
33 cervical intraepithelial neoplasia grade iii  
34 cervical neoplasia screen  
35 cervical smear: ? gland neopl.  
36 tumor of uterine body in pregnancy, childbirth and the puerperium  
37 tumor of uterine body affecting obstetric care  
38 tumor of uterine body - baby delivered  
39 tumor of uterine body - baby delivered with postpartum complication  
40 tumor of uterine body complicating antenatal care, baby not yet delivered  
41 monoclonal paraproteinemia  
42 glaucoma due to ocular tumor or cyst  
43 congenital torticollis  
44 contracture of sternocleidomastoid muscle  
45 congenital wryneck  
46 cancer cervix screening - not attended  
47 cancer cervix - screening done  
48 screening for malignant neoplasm of respiratory tract  
49 respiratory neoplasm screening  
50 screening for malignant neoplasm of breast

1 breast cancer screening  
2 screening for breast cancer  
3 screening for malignant neoplasm of large intestine  
4 malignant neoplasm of digestive organs and peritoneum  
5 malignant tumor of lesser curve of stomach  
6 ca lesser curvature - stomach  
7 malignant tumour of greater curve of stomach  
8 malignant tumor of greater curve of stomach  
9 ca greater curvature - stomach  
10 malignant neoplasm of soft tissue  
11 malignant tumour of soft tissue  
12 malignant tumor of soft tissue  
13 malignant neoplasm of lip, oral cavity and/or pharynx  
14 carcinoma in situ of lip, oral cavity and/or pharynx  
15 chondroma  
16 malignant tumour of mucosa of lower lip  
17 malignant tumour of oral aspect of lower lip  
18 malignant tumour of inner aspect of lower lip  
19 malignant tumour of buccal aspect of lower lip  
20 malignant tumor of lower labial mucosa  
21 malignant tumor of buccal aspect of lower lip  
22 malignant tumor of inner aspect of lower lip  
23 malignant tumor of oral aspect of lower lip  
24 malignant tumor of mucosa of lower lip  
25 choriadenoma (destruens)  
26 choriocarcinoma  
27 mm - malignant melanoma of eye  
28 squamous cell carcinoma of skin nos  
29 [m]squamous cell carcinoma of skin nos  
30 carcinoid tumour - argentaffin  
31 argentaffinoma  
32 carcinoid tumor - argentaffin  
33 malignant tumour of lipstick area of lip  
34 malignant tumor of lipstick area of lip  
35 cin i - ii, cervical dysplasia  
36 cin i - mild dyskaryosis  
37 cin ii - moderate dyskaryosis  
38 cin iii - carcinoma in situ of cervix  
39 cin iii - severe dyskaryosis  
40 screening for malignant neoplasm of colon  
41 screening for colon cancer  
42 colon cancer screening  
43 screening for malignant neoplasm of rectum  
44 rectal neoplasm screening  
45 screening for malignant neoplasm of lung  
46 lung neoplasm screening  
47 dfsp - dermatofibrosarcoma protruberans  
48 dermatofibrosarcoma  
49 vain - vaginal intraepithelial neoplasia 1  
50 vain - vaginal intraepithelial neoplasia 2

1 mild dysplasia of vulva  
2 vin - vulval intraepithelial neoplasia grade 1  
3 moderate dysplasia of vulva  
4 vin - vulval intraepithelial neoplasia grade 2  
5 vulval intraepithelial neoplasia grade iii  
6 vin - vulval intraepithelial neoplasia grade 3  
7 vin iii - vulval intraepithelial neoplasia grade iii  
8 severe dysplasia of vulva  
9 malignant tumour of external ear  
10 malignant tumor of external ear  
11 progesterone receptor negative tumour  
12 oestrogen receptor negative tumour  
13 mgus - monoclonal gammopathy of uncertain significance  
14 monoclonal gammopathy of undetermined significance  
15 tumour hormone receptor status  
16 lymphoreticular tumour  
17 lymphoreticular tumor  
18 superior pulmonary sulcus syndrome  
19 pancoast syndrome  
20 malignant tumour of lacrimal drainage structure  
21 malignant tumor of lacrimal drainage structure  
22 cin - cervical intraepithelial neoplasia  
23 cin i - cervical intraepithelial neoplasia 1  
24 mild dysplasia of cervix  
25 cin 2 - cervical intraepithelial neoplasia 2  
26 moderate dysplasia of cervix  
27 lung tumour excision  
28 open bladder tumour fulguration  
29 open bladder tumour resection  
30 colon neoplasm screen  
31 colonic cancer  
32 antineoplastic/immunosuppressant/immunostim adverse reaction  
33 antineoplastic/immunosuppressant/immunostimulant adverse reaction  
34 excision of malignant skin tumor  
35 malignant tumour of fraenum of lip  
36 malignant tumor of frenum of lip  
37 malignant tumour of soft tissue of head, face and neck  
38 malignant tumor of soft tissue of head, face and neck  
39 malignant tumour of unknown origin or ill-defined site  
40 malignant tumor of unknown origin or ill-defined site  
41 chromaffin paraganglioma  
42 adrenal medullary paraganglioma  
43 lm - lentigo maligna  
44 nephroblastoma  
45 nephroma  
46 wilm's tumor  
47 wilms tumour  
48 wilms tumor  
49 gastric metaplasia of esophagus  
50 gastric metaplasia of oesophagus

1 metastasis to multiple lymph nodes  
2 osteosarcoma of bone  
3 osteosarcoma - disorder  
4 disseminated carcinomatosis  
5 carcinoid syndrome  
6 excision biopsy of basal cell carcinoma  
7 excision biopsy of rodent ulcer  
8 wermer's syndrome  
9 curettage of lesion of bone and graft hfq  
10 local recurrence of malignant tumor of breast  
11 local recurrence of malignant tumor of urinary bladder  
12 hnpcc - hereditary nonpolyposis colon cancer  
13 hnpcc - hereditary nonpolyposis colorectal cancer  
14 pain of metastatic malignancy  
15 cystoscopic extirpation of bladder lesion  
16 recurrence of tumour  
17 meckel's diverticulum  
18 persistent omphalomesenteric duct  
19 persistent vitelline duct  
20 malignant tumour  
21 malignant tumor  
22 ca - cancer  
23 malignant tumor of lip  
24 ca - cancer of lip  
25 cancer of lip  
26 malignant tumour of stomach  
27 cancer of stomach  
28 gastric cancer  
29 ca - cancer of stomach  
30 malignant tumour of caecum  
31 malignant tumor of cecum  
32 ca - cancer of caecum  
33 cancer of caecum  
34 malignant neoplasm of cecum  
35 ca - cancer of cecum  
36 cancer of cecum  
37 cecal cancer  
38 malignant tumour of rectum  
39 rectal cancer  
40 ca - cancer of rectum  
41 malignant tumor of anal canal  
42 cancer of anal canal  
43 malignant tumour of gallbladder  
44 gallbladder ca  
45 malignant tumor of cervix  
46 cancer of cervix  
47 malignant neoplasm of cervix  
48 cancer of the uterine cervix  
49 cervical cancer  
50 malignant tumour of adrenal gland

1 malignant tumor of adrenal gland  
2 ca - cancer of adrenal gland  
3 cancer of adrenal gland  
4 adrenal gland malignancy  
5 malignant tumour of lung  
6 ca - lung cancer  
7 malignant tumour of anterior two-thirds of tongue  
8 malignant tumor of anterior two-thirds of tongue  
9 malignant tumour of soft tissue of thorax  
10 malignant tumor of soft tissue of thorax  
11 malignant neoplasm of soft tissue of thorax  
12 malignant tumour of soft tissue of pelvis  
13 malignant tumor of soft tissue of pelvis  
14 malignant tumour of vulva  
15 cancer of vulva  
16 malignant tumor of vermilion border of upper lip  
17 malignant tumour of lipstick area of upper lip  
18 malignant tumor of lipstick area of upper lip  
19 malignant tumor of vermilion border of lower lip  
20 malignant tumour of lipstick area of lower lip  
21 malignant tumor of lipstick area of lower lip  
22 malignant tumour of commissure of lip  
23 malignant tumor of commissure of lip  
24 malignant tumour of labial commissure  
25 malignant tumor of labial commissure  
26 malignant tumor of tongue  
27 ca - cancer of tongue  
28 cancer of tongue  
29 malignant tumour of base of tongue  
30 malignant tumour of posterior third of tongue  
31 malignant tumour of fixed part of tongue  
32 malignant tumour of tongue posterior to vallate papillae  
33 malignant tumor of fixed part of tongue  
34 malignant tumor of tongue posterior to vallate papillae  
35 malignant tumor of posterior third of tongue  
36 malignant tumour of lingual tonsil  
37 malignant tumor of lingual tonsil  
38 malignant tumor of major salivary gland  
39 malignant tumor of parotid gland  
40 cancer of parotid gland  
41 ca - cancer of parotid gland  
42 malignant tumour of submandibular gland  
43 malignant tumor of submandibular gland  
44 malignant tumour of sublingual gland  
45 malignant tumor of sublingual gland  
46 malignant tumour of gum  
47 malignant tumor of gum  
48 malignant tumour of alveolar mucosa  
49 malignant tumour of gingiva  
50 malignant tumor of alveolar mucosa

1 malignant tumor of gingiva  
2 cancer of gum  
3 ca - cancer of gum  
4 malignant tumour of upper gingiva  
5 malignant tumor of upper gingiva  
6 malignant tumour of upper gum  
7 malignant tumor of upper gum  
8 malignant tumour of lower gingiva  
9 malignant tumor of lower gingiva  
10 malignant tumour of lower gum  
11 malignant tumor of lower gum  
12 malignant tumor of floor of mouth  
13 fom - malignant tumour of floor of mouth  
14 fom - malignant tumor of floor of mouth  
15 fom - cancer of floor of mouth  
16 cancer of floor of mouth  
17 ca - cancer of floor of mouth  
18 malignant tumour of buccal mucosa  
19 malignant tumor of buccal mucosa  
20 malignant tumour of internal cheek  
21 malignant tumor of internal cheek  
22 malignant tumour of cheek mucosa  
23 malignant tumor of cheek mucosa  
24 ca - cancer of cheek mucosa  
25 ca - cancer of buccal mucosa  
26 cancer of cheek mucosa  
27 cancer of buccal mucosa  
28 malignant tumour of hard palate  
29 malignant tumor of hard palate  
30 malignant tumour of soft palate  
31 malignant tumor of soft palate  
32 malignant tumour of uvula  
33 malignant tumor of uvula  
34 malignant tumor of palate  
35 malignant tumour of roof of mouth  
36 malignant tumor of roof of mouth  
37 cancer of palate  
38 ca - cancer of palate  
39 malignant tumour of retromolar area  
40 malignant tumor of retromolar area  
41 malignant tumor of oropharynx  
42 cancer of oropharynx  
43 ca - cancer of oropharynx  
44 malignant tumour of mesopharynx  
45 malignant tumor of mesopharynx  
46 malignant tumour of tonsil  
47 malignant tumour of palatine tonsil  
48 malignant tumour of faucial tonsil  
49 malignant tumor of faucial tonsil  
50 malignant tumor of palatine tonsil  
51 malignant tumor of palatine tonsil

1 cancer of tonsil  
2 ca - cancer of tonsil  
3 malignant tumor of tonsillar fossa  
4 malignant tumour of vallecule  
5 malignant tumor of vallecule  
6 malignant tumour of branchial cleft  
7 malignant tumor of branchial cleft  
8 malignant tumour of roof of nasopharynx  
9 malignant tumor of roof of nasopharynx  
10 malignant tumour of superior wall of nasopharynx  
11 malignant tumor of superior wall of nasopharynx  
12 malignant tumor of lateral wall of nasopharynx  
13 malignant tumour of hypopharynx  
14 malignant tumor of laryngopharynx  
15 malignant tumour of laryngopharynx  
16 malignant tumor of laryngopharynx  
17 malignant tumour of postcricoid region  
18 malignant tumor of postcricoid region  
19 malignant tumour of pharyngo-oesophageal junction  
20 malignant tumor of pharyngoesophageal junction  
21 malignant tumour of pyriform fossa  
22 malignant tumor of pyriform fossa  
23 malignant tumour of pyriform sinus  
24 malignant tumor of pyriform sinus  
25 malignant tumour of oesophagus  
26 malignant tumor of esophagus  
27 cancer of oesophagus  
28 ca - cancer of oesophagus  
29 cancer of esophagus  
30 ca - cancer of esophagus  
31 esophageal cancer  
32 malignant neoplasm of esophagus  
33 malignant tumour of duodenum  
34 duodenal cancer  
35 malignant tumour of jejunum  
36 malignant tumor of jejunum  
37 malignant tumor of ileum  
38 malignant tumor of colon  
39 ca - cancer of colon  
40 cancer of colon  
41 malignant tumour of hepatic flexure  
42 hepatic flexure colon cancer  
43 malignant tumor of transverse colon  
44 transverse colon cancer  
45 malignant tumour of descending colon  
46 descending colon cancer  
47 malignant tumor of sigmoid colon  
48 sigmoid colon cancer  
49 malignant tumour of appendix  
50 malignant tumor of appendix  
51 malignant tumor of ascending colon



1 ascending colon cancer  
2 malignant tumour of splenic flexure  
3 malignant tumor of splenic flexure  
4 splenic flexure colon cancer  
5 malignant tumor of rectosigmoid junction  
6 rectosigmoid colon cancer  
7 malignant tumour of biliary tract  
8 malignant tumor of biliary tract  
9 malignant tumor of extrahepatic bile duct  
10 extrahepatic bile duct cancer  
11 malignant tumour of ampulla of vater  
12 malignant tumor of ampulla of vater  
13 malignant tumor of pancreas  
14 ca - cancer of pancreas  
15 pancreatic cancer  
16 ca - pancreatic cancer  
17 malignant tumour of head of pancreas  
18 ca head of pancreas  
19 malignant retroperitoneal tumour  
20 malignant retroperitoneal tumor  
21 cancer of omentum  
22 ca - cancer of omentum  
23 malignant tumour of nasal cavity  
24 malignant tumor of nasal cavity  
25 malignant tumour of nasal septum  
26 malignant tumor of nasal septum  
27 malignant tumour of mastoid air cells  
28 malignant tumor of mastoid air cells  
29 malignant tumour of maxillary sinus  
30 malignant tumor of maxillary sinus  
31 malignant tumour of maxillary antrum  
32 malignant tumor of maxillary antrum  
33 malignant tumour of ethmoid sinus  
34 malignant tumor of ethmoid sinus  
35 malignant tumour of frontal sinus  
36 malignant tumor of frontal sinus  
37 malignant tumour of sphenoid sinus  
38 malignant tumor of sphenoid sinus  
39 malignant tumor of larynx  
40 ca - cancer of larynx  
41 laryngeal cancer  
42 cancer of larynx  
43 malignant tumour of subglottis  
44 malignant tumor of subglottis  
45 malignant tumor of laryngeal cartilage  
46 malignant tumour of trachea  
47 malignant tumor of trachea  
48 tracheal cancer  
49 ca - cancer of trachea  
50 malignant tracheal tumor

1 malignant tracheal tumour  
2 malignant tumor of pleura  
3 cancer of pleura  
4 ca - cancer of pleura  
5 malignant tumour of thymus  
6 malignant tumor of thymus  
7 malignant tumor of heart  
8 malignant tumour of endocardium  
9 malignant tumor of endocardium  
10 malignant tumour of myocardium  
11 malignant tumor of myocardium  
12 malignant tumour of vertebral column  
13 malignant tumor of vertebral column  
14 ca - cancer of spine  
15 cancer of spine  
16 malignant neoplasm of spine  
17 malignant tumour of soft tissue of head  
18 malignant tumor of soft tissue of head  
19 malignant tumour of soft tissue of face  
20 malignant tumor of soft tissue of face  
21 malignant tumour of soft tissue of neck  
22 malignant tumor of soft tissue of neck  
23 malignant tumor of ovary  
24 ca - cancer of ovary  
25 ovarian cancer  
26 malignant tumour of fallopian tube  
27 malignant tumor of fallopian tube  
28 malignant tumor of vagina  
29 cancer of vagina  
30 malignant tumor of testis  
31 malignant tumour of foreskin  
32 malignant tumor of foreskin  
33 malignant tumour of prepuce  
34 malignant tumor of prepuce  
35 cancer of foreskin  
36 malignant neoplasm of foreskin  
37 malignant tumour of glans penis  
38 malignant tumor of glans penis  
39 cancer of glans penis  
40 malignant tumour of epididymis  
41 malignant tumor of epididymis  
42 malignant tumour of spermatic cord  
43 malignant tumor of spermatic cord  
44 spermatic cord ca  
45 malignant tumour of scrotum  
46 malignant tumor of scrotum  
47 malignant scrotal tumour  
48 malignant scrotal tumor  
49 ca - cancer of scrotum  
50 cancer of scrotum

1 scrotal ca  
2 malignant tumour of urachus  
3 malignant tumor of urachus  
4 malignant tumor of renal pelvis  
5 malignant tumour of ureter  
6 cancer of ureter  
7 ureter ca  
8 malignant tumour of urethra  
9 malignant tumor of urethra  
10 malignant urethral tumour  
11 malignant urethral tumor  
12 urethral ca  
13 ca - cancer of urethra  
14 malignant tumour of paraurethral gland  
15 malignant tumor of paraurethral gland  
16 malignant neoplasm of paraurethral gland  
17 malignant tumour of eye  
18 malignant tumor of eye  
19 malignant tumour of orbit  
20 malignant tumor of orbit  
21 malignant orbital tumour  
22 malignant orbital tumor  
23 malignant tumour of conjunctiva  
24 malignant tumor of conjunctiva  
25 malignant tumour of cornea  
26 malignant tumor of cornea  
27 malignant tumour of retina  
28 malignant tumor of retina  
29 malignant retinal tumour  
30 malignant retinal tumor  
31 malignant tumour of choroid  
32 malignant tumor of choroid  
33 cancer of the cerebral meninges  
34 malignant tumour of spinal cord  
35 malignant tumor of spinal cord  
36 malignant tumour of thyroid gland  
37 thyroid cancer  
38 thyroid ca  
39 malignant tumour of parathyroid gland  
40 malignant tumor of parathyroid gland  
41 parathyroid cancer  
42 malignant tumour of pituitary gland  
43 malignant tumor of pituitary gland  
44 cancer of pituitary gland  
45 ca - cancer of pituitary gland  
46 pituitary cancer  
47 malignant tumour of pineal gland  
48 malignant tumor of pineal gland  
49 pineal cancer  
50 cancer of pineal gland

1 malignant tumour of pelvis  
2 malignant tumor of pelvis  
3 malignant tumor of neck  
4 malignant tumour of anus  
5 malignant tumor of anus  
6 malignant tumour of cloacogenic zone  
7 malignant tumor of cloacogenic zone  
8 malignant tumour of peritoneum  
9 malignant tumor of peritoneum  
10 peritoneal cancer  
11 ca - cancer of peritoneum  
12 cancer of peritoneum  
13 malignant tumour of mediastinum  
14 malignant neoplasm of mediastinum  
15 malignant mediastinal tumor  
16 malignant mediastinal tumour  
17 malignant tumor of meninges  
18 malignant tumour of optic nerve  
19 malignant tumor of optic nerve  
20 malignant tumor of spleen  
21 malignant tumor of axilla  
22 malignant tumour of upper limb  
23 malignant tumor of upper limb  
24 malignant tumor of lower limb  
25 malignant tumour of oral cavity  
26 malignant tumor of oral cavity  
27 malignant tumour of mouth  
28 malignant tumor of mouth  
29 cancer of oral cavity  
30 ca - mouth cancer  
31 mouth cancer  
32 malignant neoplasm of mouth  
33 malignant tumour of nasal sinuses  
34 malignant tumor of nasal sinuses  
35 malignant tumour of pharynx  
36 malignant tumor of pharynx  
37 cancer of pharynx  
38 ca - cancer of pharynx  
39 malignant neoplasm of pharynx  
40 malignant tumor of intestine  
41 cancer of intestine  
42 malignant neoplasm of intestine  
43 ca - cancer of intestine  
44 intestinal cancer  
45 ca - cancer of bowel  
46 malignant tumour of small intestine  
47 malignant tumour of small bowel  
48 malignant tumor of small bowel  
49 malignant tumor of female genital organ  
50 malignant tumour of male genital organ

1 malignant tumor of penis  
2 cancer of penis  
3 penile ca  
4 ca penis  
5 ca - cancer of penis  
6 malignant tumor of kidney  
7 renal malignant tumour  
8 renal malignant tumor  
9 ca - renal cancer  
10 ca - cancer of kidney  
11 renal cancer  
12 navigational concept  
13 cancer care plan given  
14 referred to cancer primary healthcare multidisciplinary team  
15 malignant neoplasm (morphology)  
16 malignant neoplasm of primary, secondary, or uncertain origin  
17 gleason score 2-4: well differentiated  
18 gleason score 8-10: poorly differentiated  
19 dysplasia of vulva  
20 malignant tumour of adrenal cortex  
21 malignant tumor of adrenal cortex  
22 malignant tumour of adrenal medulla  
23 malignant tumor of adrenal medulla  
24 malignant tumour of body of uterus  
25 malignant tumor of body of uterus  
26 body of uterus ca  
27 malignant tumour of uterus  
28 malignant tumor of uterus  
29 ca - cancer of uterus  
30 cancer of uterus  
31 uterine cancer  
32 clitoral ca  
33 malignant tumour of endocrine gland  
34 malignant tumor of endocrine gland  
35 malignant tumour of nervous system  
36 malignant tumor of nervous system  
37 female breast cancer  
38 cancer of female breast  
39 ca main bronchus  
40 primary malignant neoplasm  
41 ca breast - male  
42 ca cervix uteri - endocervix  
43 cancer of exocervix  
44 malignant neoplasm of skin head and neck  
45 ca skin - head/neck  
46 ca skin - trunk  
47 skin cancer  
48 cancer of skin  
49 primary malignant neoplasm of gallbladder  
50 sarcoma - category

1  
2 reticulum cell sarcoma  
3 siewert type ii adenocarcinoma  
4 siewert type iii adenocarcinoma  
5 siewert type i adenocarcinoma  
6 drugs used in malignant disease and immunosuppression  
7 malignant multiple sclerosis  
8 endoscopic extirpation of bladder lesion  
9 transurethral resection of bladder neoplasm  
10 turt - transurethral resection of bladder tumour  
11 transurethral resection of bladder tumour  
12 turbt - transurethral resection of bladder tumor  
13 turt - transurethral resection of bladder tumor  
14 transurethral resection of bladder tumor  
15 epithelioma  
16 neoplasm of soft tissue  
17 tumour of soft tissue  
18 soft tissue tumour  
19 soft tissue tumor  
20 tumor of soft tissue  
21 neoplasm of soft tissues  
22 neoplasm of endocrine gland  
23 tumour of endocrine gland  
24 tumor of endocrine gland  
25 neoplasm of endocrine system  
26 tumour of endocrine system  
27 tumor of endocrine system  
28 exam for ? neoplasm  
29 excision malignant skin tumour  
30 tumor marker monitoring  
31 cancer diagnosis discussed with partner in relationship  
32 ca care plan discussed with pt  
33 cancer care plan discussed with partner in relationship  
34 erythroplasia of queyrat  
35 paget's disease of penis  
36 queyrat erythroplasia  
37 malignant tumor of prostate  
38 malignant prostatic tumour  
39 malignant prostatic tumor  
40 ca - cancer of prostate  
41 cancer of prostate  
42 malignant tumour of urinary bladder  
43 malignant tumor of urinary bladder  
44 bladder cancer  
45 ca - bladder cancer  
46 vulval intraepithelial neoplasia (vin)  
47 leiomyomatous neoplasm - category  
48 soft tissue tumour of smooth muscle differentiation  
49 rhabdomyomatous neoplasm - category  
50 soft tissue tumour of skeletal muscle differentiation  
51 fibrohistiocytic neoplasm - category  
52

1  
2 leiomyosarcoma - category  
3 vascular neoplasm of skin  
4 cutaneous vascular tumour  
5 pseudosarcomatous fasciitis  
6 squamous cell carcinoma - category  
7 squamous neoplasm of surface epithelium  
8 melanotic macule  
9 malignant peripheral nerve sheath tumour  
10 malignant peripheral nerve sheath tumor  
11 neurofibrosarcoma  
12 malignant schwannoma  
13 digital myxoid cyst  
14 sex hormones and antagonists in malignant disease  
15 widespread metastatic malignant neoplastic disease  
16 generalised cancer  
17 generalised malignancy  
18 generalized malignancy  
19 generalized cancer  
20 disseminated cancer  
21 malignant neoplasm, disseminated  
22 ca - disseminated cancer  
23 nettle's syndrome  
24 neoplasm screen excl. cervical  
25 neoplasm uncert / unkn behav brain, infratentorial  
26 neoplasms  
27 neoplasm of unspec nature of bone, skin or soft tissue nos  
28 neoplasm of unspecified nature nos  
29 neop unspec nature of endocrine glands, other nervous system  
30 neopl uncert/unkn behav of periph nerves & autonom nerv sys  
31 neo/uncertn+unknwn behav/lymph,h'matopetc+rel tiss,unspcf  
32 myopathy due to malignant disease  
33 breast cancer 1, early onset gene mutation positive  
34 breast cancer 1, early onset gene mutation negative  
35 breast cancer 2, early onset gene mutation positive  
36 breast cancer 2, early onset gene mutation negative  
37 cancer emotional and psychosocial support and education  
38 mast cell neoplasm  
39 mature (peripheral) t-cell neoplasm  
40 estrogen receptor positive tumor  
41 progesterone receptor positive tumor  
42 chorioadenoma  
43 chorioadenoma destruens  
44 im - invasive mole  
45 invasive mole  
46 malignant teratoma of undescended testis  
47 malignant teratoma of descended testis  
48 sex cord-stromal tumour category  
49 sex cord-stromal tumor category  
50 malignant tumor of urinary system  
51 gastrointestinal stromal tumor

1  
2 gist - gastrointestinal stromal tumor  
3 gist - gastrointestinal stromal tumour  
4 gastrointestinal stromal sarcoma  
5 kaposi sarcoma associated with aids  
6 kaposi's sarcoma associated with acquired immunodeficiency syndrome  
7 multiple endocrine adenomatosis  
8 malignant tumor of vermilion border of lip  
9 moderate vulvar dysplasia  
10 idiopathic hypereosinophilic syndrome  
11 idiopathic hypereosinophilic syndrome (hes)  
12 mild vulvar dysplasia  
13 metastases of respiratory and/or digestive systems  
14 mesothelioma of pleura  
15 malignant neoplasm of thoracic cavity structure  
16 intrathoracic malignant neoplasm  
17 phyllodes tumour - category  
18 phyllodes tumor - category  
19 implantation of carmustine wafer into cerebrum  
20 excisional biopsy of basal cell carcinoma  
21 resection of tumor of heart  
22 resection of tumour of heart  
23 melanoma in situ of ear and external auricular canal  
24 melanoma in situ of lower limb, including hip  
25 melanoma in situ of other and unspecified parts of face  
26 melanoma in situ of upper limb, including shoulder  
27 melanoma in situ, unspecified  
28 uterine body tumour in pregnancy/childbirth/puerperium nos  
29 uterine fibroid - baby delivered + postpartum complication  
30 uterine fibroid complicating a/n care, baby not delivered  
31 uterine fibroid in pregnancy/childbirth/puerperium nos  
32 bowel cancer screening programme: faecal occult blood result  
33 mast cell disease  
34 mast cell malignancy of lymph nodes inguinal region and leg  
35 mastocytoma nos  
36 malignant neoplasm of frontal sinus  
37 malignant neoplasm, overlapping lesion of major saliv gland  
38 malignant neoplasm, overlap lesion periph nerve & auton ns  
39 malignant neoplasm-pluriglandular involvement,unspecified  
40 malignant neoplasm/bones+articular cartilage/limb,unspfd  
41 malignant neoplasm/overlap lesion/bone+articulr cartilage  
42 malignant neoplasm/overlapping lesion/feml genital organs  
43 malignant neoplasm/peripheral nerves of trunk,unspecified  
44 malignant reticuloendotheliosis  
45 malignant neoplasm of vertebral column  
46 malignant neoplasm other gallbladder/extrahepatic bile duct  
47 malignant neoplasm other spec digestive tract and peritoneum  
48 malignant neoplasm overlapping lesion of skin  
49 malignant neoplasm pituitary gland and craniopharyngeal duct  
50 malignant neoplasm posterior margin nasal septum and choanae  
51 malignant neoplasm rectum,rectosigmoid junction and anus nos  
52  
53  
54  
55  
56  
57  
58  
59  
60



1 malignant neoplasm skin of ear and external auricular canal  
2 malignant neoplasm skin of other and unspecified parts face  
3 malignant neoplasm skin other and unspec part of face nos  
4 malignant neoplasm, overlap les bone and artic cart of limbs  
5 malignant neoplasm, overlap lesion connective & soft tissue  
6 malignant neoplasm, overlap lesion of resp & intrathor orgs  
7 malignant neoplasm, overlapping lesion male genital orgs  
8 malignant neoplasm, overlapping lesion of brain  
9 malignant neoplasm of upper gum  
10 malignant neoplasm of upper lip, buccal aspect  
11 malignant neoplasm of upper lip, external  
12 malignant neoplasm of urachus  
13 malignant neoplasm of ureter  
14 malignant neoplasm of urethra  
15 malignant neoplasm of uvula  
16 malignant neoplasm of vagina  
17 malignant neoplasm of sweat gland  
18 malignant neoplasm of testis  
19 malignant neoplasm of thymus  
20 malignant neoplasm of thyroid gland  
21 malignant neoplasm of tongue  
22 malignant neoplasm of tonsil  
23 malignant neoplasm of tonsillar fossa  
24 malignant neoplasm of trachea  
25 malignant neoplasm of transverse colon  
26 malignant neoplasm of vallecula  
27 malignant neoplasm of small intestine and duodenum  
28 malignant neoplasm of soft palate  
29 malignant neoplasm of spermatic cord  
30 malignant neoplasm of sphenoidal sinus  
31 malignant neoplasm of spinal cord  
32 malignant neoplasm of splenic flexure of colon  
33 malignant neoplasm of stomach  
34 malignant neoplasm of subglottis  
35 malignant neoplasm of sublingual gland  
36 malignant neoplasm of septum of nose  
37 malignant neoplasm of sigmoid colon  
38 malignant neoplasm of prepylorus of stomach  
39 malignant neoplasm of prostate  
40 malignant neoplasm of pyriform sinus  
41 malignant neoplasm of rectosigmoid junction  
42 malignant neoplasm of renal calyces  
43 malignant neoplasm of renal pelvis  
44 malignant neoplasm of retained testis  
45 malignant neoplasm of retina  
46 malignant neoplasm of retromolar area  
47 postoperative follow-up visit  
48 malignant neoplasm of pelvis  
49 malignant neoplasm of peripheral nerve of low limb, incl hip  
50 malignant neoplasm of peripheral nerve, upp limb, incl should

1 malignant neoplasm of peripheral nerves of head, face & neck  
2 malignant neoplasm of pineal gland  
3 malignant neoplasm of pituitary gland  
4 malignant neoplasm of pleura  
5 malignant neoplasm of postcricoid region  
6 malignant neoplasm of scrotum  
7 malignant neoplasm of other specified site small intestine  
8 malignant neoplasm of ovary  
9 malignant neoplasm of overlapping lesion of bronchus & lung  
10 malignant neoplasm of overlapping lesion of tonsil  
11 malignant neoplasm of overlapping lesion of vulva  
12 malignant neoplasm of palatopharyngeal arch  
13 malignant neoplasm of pancreas  
14 malignant neoplasm of parathyroid gland  
15 malignant neoplasm of paraurethral glands  
16 malignant neoplasm of parotid gland  
17 malignant neoplasm of orbit  
18 malignant neoplasm of oropharynx  
19 malignant neoplasm of other and ill defined site nos  
20 malignant neoplasm of other and unspecified site os  
21 malignant neoplasm of other sites lip, oral cavity, pharynx  
22 malignant neoplasm of metatarsal bones of foot  
23 malignant neoplasm of myocardium  
24 malignant neoplasm of lower gum  
25 malignant neoplasm of lower lip, mucosa  
26 malignant neoplasm of lower lip, oral aspect  
27 malignant neoplasm of lower lip, vermilion border  
28 oestrogen receptor negative neoplasm  
29 estrogen receptor negative neoplasm  
30 progesterone receptor negative neoplasm  
31 malignant neoplasm of mastoid air cells  
32 malignant neoplasm of maxillary sinus  
33 malignant neoplasm of mediastinum, part unspecified  
34 malignant neoplasm of meninges, unspecified  
35 malignant neoplasm of lacrimal duct  
36 malignant neoplasm of laryngeal cartilage  
37 malignant neoplasm of laryngopharynx  
38 malignant neoplasm of larynx  
39 malignant neoplasm of lateral wall of nasopharynx  
40 malignant neoplasm of lingual tonsil  
41 malignant neoplasm of lip  
42 malignant neoplasm of lip unspecified, buccal aspect  
43 malignant neoplasm of hard palate  
44 malignant neoplasm of head of pancreas  
45 malignant neoplasm of heart  
46 malignant neoplasm of hepatic flexure of colon  
47 malignant neoplasm of histiocytic tissue  
48 malignant neoplasm of hypopharynx  
49 malignant neoplasm of ileum  
50 malignant neoplasm of jejunum

1 malignant neoplasm of floor of mouth  
2 malignant neoplasm of gallbladder  
3 malignant neoplasm of genitourinary organ os  
4 malignant neoplasm of glans penis  
5 malignant neoplasm of glossopalatine fold  
6 malignant neoplasm of gum  
7 malignant neoplasm of descending colon  
8 malignant neoplasm of duodenum  
9 malignant neoplasm of endocardium  
10 papillary neoplasm  
11 papillary tumor  
12 papillary tumour  
13 malignant neoplasm of epididymis  
14 malignant neoplasm of extrahepatic bile ducts  
15 malignant neoplasm of eyelid including canthus  
16 malignant neoplasm of fallopian tube  
17 malignant neoplasm of colon  
18 malignant neoplasm of commissure of lip  
19 malignant neoplasm of common bile duct  
20 malignant neoplasm of conjunctiva  
21 malignant neoplasm of cornea  
22 malignant neoplasm of costo-vertebral joint  
23 malignant neoplasm of cranial nerves  
24 malignant neoplasm of cheek mucosa  
25 malignant neoplasm of choroid  
26 malignant neoplasm of skin of face  
27 malignant neoplasm of appendix  
28 malignant neoplasm of ascending colon  
29 malignant neoplasm of base of tongue  
30 malignant neoplasm of brain stem  
31 malignant neoplasm of brain stem nos  
32 malignant neoplasm of branchial cleft  
33 malignant neoplasm of buccal mucosa  
34 ependymoma - category  
35 malignant melanoma of upper limb and shoulder  
36 malignant neoplasm aryepiglottic fold, hypopharyngeal aspect  
37 malignant neoplasm cerebrum (excluding lobes and ventricles)  
38 malignant neoplasm gallbladder and extrahepatic bile ducts  
39 malignant neoplasm gallbladder/extrahepatic bile ducts nos  
40 malignant neoplasm of acoustic nerve  
41 malignant neoplasm of ampulla of vater  
42 oligodendroglioma - category  
43 seminoma - category  
44 malignant melanoma of eyelid including canthus  
45 malig neopl of connective and soft tissue - sacrum or coccyx  
46 malig neopl peripheral nerves and autonomic nervous system  
47 malig neopl, overlap lesion brain & other part of cns  
48 malig neoplasm of connective and soft tissues of lumb spine  
49 malig neoplasm of connective and soft tissues of thor spine  
50 malig neop connective and soft tissue other specified site  
51  
52  
53  
54  
55  
56  
57  
58  
59  
60

1 malig neop connective and soft tissue upper limb/shoulder  
2 malig neop connective soft tissue upper limb/shoulder nos  
3 malig neop eyeball excl conjunctiva, cornea, retina, choroid  
4 malig neop nasal cavities, middle ear and accessory sinuses  
5 malig neop of bone, connective tissue, skin and breast  
6 malig neop of bone, connective tissue, skin and breast nos  
7 malig neop of bone, connective tissue, skin and breast os  
8 malig neop of connective and soft tissue head, face and neck  
9 malig neop of connective and soft tissue of abdomen nos  
10 malig neop of connective and soft tissue of abdominal wall  
11 malig neop of connective and soft tissue of great toe  
12 malig neop of connective and soft tissue of hip and leg  
13 malig neop of connective and soft tissue of inguinal region  
14 malig neop of connective and soft tissue of lower leg  
15 malig neop of connective and soft tissue of pelvis nos  
16 malig neop of connective and soft tissue of thorax nos  
17 malig neop of connective and soft tissue thigh and upper leg  
18 malig neop of connective and soft tissue trunk unspecified  
19 malig neop of endocrine gland or related structure nos  
20 malig neop of kidney and other unspecified urinary organs  
21 malig neop of other and unspecified female genital organs  
22 malig neop of other and unspecified parts of nervous system  
23 malig neop of other endocrine glands and related structures  
24 malig neop of other site of heart, thymus and mediastinum  
25 malig neop of respiratory tract and intrathoracic organs  
26 malig neop of scapula and long bones of upper arm nos  
27 malig neop of upper respiratory tract, part unspecified  
28 malig neop oth/ill-defined sites digestive tract/peritoneum  
29 screening for skin cancer  
30 malig neop other site nasal cavity, middle ear and sinuses  
31 malig neop other site rectum, rectosigmoid junction and anus  
32 malig neop other/ill-defined sites lip, oral cavity, pharynx  
33 malig neop other/ill-defined sites resp/intrathoracic organs  
34 malig neop skin of ear and external auricular canal nos  
35 malig neo, overlapping lesion of heart, mediastinum & pleura  
36 malig neop auditory tube, middle ear and mastoid air cells  
37 malig neop auditory tube, middle ear, mastoid air cells nos  
38 malig neop connective and soft tissue head, face, neck nos  
39 malig neop pituitary gland or craniopharyngeal duct nos  
40 malig neop connective and soft tissue hip and leg nos  
41 malig neop connective and soft tissue of popliteal space  
42 mal neoplasm/periph nerves+autonomic nervous system,unspc  
43 lymph node metastases  
44 sarcoma of dendritic cells (accessory cells)  
45 lung neoplasm screen  
46 lung cancer  
47 no response to bowel cancer screening programme invitation  
48 cancer of carotid body  
49 curettage of lesion of bone and grafting of bone  
50 carcinoma of cheek

1 malignant epithelial neoplasm of cheek  
2 cancer of urinary organ  
3 cancer of mandible  
4 cancer of posterior mediastinum  
5 cancer of parametrium  
6 tumour of respiratory system  
7 neoplasm of respiratory system  
8 tumor of respiratory system  
9 cancer of lateral wall of oropharynx  
10 cancer of parietal pleura  
11 cancer of respiratory system  
12 cancer of anterior mediastinum  
13 cancer of visceral pleura  
14 cancer of pelvic peritoneum  
15 cancer of cerebellum  
16 malignant neoplasm of long bone of lower limb  
17 liver metastases  
18 urinary neoplasm screen  
19 excision of tumour of bone  
20 patient advised about prostate cancer screening  
21 advice given about bowel cancer screening programme  
22 kaposi's sarcoma of multiple organs  
23 kaposi's sarcoma, unspecified  
24 renal cell carcinoma  
25 encapsulated papillary carcinoma  
26 encysted papillary carcinoma  
27 non-infiltrating intracystic carcinoma  
28 noninfiltrating intracystic carcinoma  
29 intracystic papillary carcinoma  
30 intracystic papillary adenocarcinoma  
31 malignant neoplasm of chest wall  
32 primary malignant neoplasm of placenta  
33 comedocarcinoma, no international classification of diseases for oncology subtype  
34 comedocarcinoma, no icd-o subtype  
35 gastric neoplasm  
36 did not attend cancer clinic  
37 dna (did not attend) cancer clinic  
38 general practitioner out of hours service notified of cancer care plan  
39 gp (general practitioner) ooh (out of hours) service notified of cancer care plan  
40 under care of cancer primary healthcare multidisciplinary team  
41 unspec cystoscopy and transurethral resection bladder lesion  
42 grade 1 (stage pta) papillary urothelial/transitional cell carcinoma  
43 grade 2 (stage pta) papillary urothelial/transitional cell carcinoma  
44 grade 3 (stage pta) papillary urothelial/transitional cell carcinoma  
45 special screening examination for neoplasm of intestinal tract  
46 histiocytic tumour nos  
47 hiv dis reslt/oth mal neopl/lymph,h'matopoetc+reltd tissu  
48 hiv disease resulting in kaposi's sarcoma  
49 hiv disease resulting in unspecified malignant neoplasm  
50 tumour marker levels

1  
2 tumour of uterine body - baby delivered + p/n complication  
3 tumour of uterine body complic p/n care, baby prev delivered  
4 tumour of uterine body complicating a/n care, baby not deliv  
5 tumour of uterine body in pregnancy/childbirth/puerperium  
6 cancer of bowel  
7  
8 clark melanoma level 2  
9 gleason grading of prostate cancer  
10 basal cell carcinoma  
11 rodent ulcer  
12 excision melanoma  
13 lung tumour excision  
14 open bladder tumour fulgurat.  
15 open bladder tumour resection  
16 tur: bladder excision nos  
17 tur:bladder papilloma excision  
18 clear bladder transurethrally  
19 intramuscular drug injection  
20 caustic injected into tumour  
21 cytotoxic given orally  
22 lip carcinoma  
23 tongue carcinoma  
24 ca major salivary gland  
25 ca gum, + rest of mouth  
26 ca oro/naso/hypopharynx  
27 ca lip, oral, pharynx nos  
28 ca lesser curvature - stomach  
29 ca greater curvature - stomach  
30 ca rectum + ca anus  
31 ca anus  
32 ca rectum + ca anus nos  
33 ca liver/biliary system  
34 ca intrahepatic bile ducts  
35 ca liver/biliary system nos  
36 ca gall bladder  
37 ca larynx - nos  
38 ca trachea/bronchus/lung nos  
39 ca trachea/bronchus/lung  
40 ca upper lobe bronchus/lung  
41 ca middle lobe bronchus/lung  
42 ca lower lobe bronchus/lung  
43 ca bone/articular cartilage  
44 ca skull/face/jaw bone  
45 ca upper limb bones/scapula  
46 ca lower limb bones  
47 ca bone/joint cartilage nos  
48 melanoma of skin  
49 melanoma - head/neck  
50 melanoma - trunk  
51 melanoma - upper limb  
52 melanoma - lower limb

1 melanoma of skin nos  
2 ca skin - other  
3 ca skin - trunk  
4 ca skin - upper limb  
5 ca skin - lower limb  
6 ca skin - other nos  
7 carcinoma breast  
8 ca breast - nipple/central  
9 ca breast-upper,inner quadrant  
10 ca breast-lower,inner quadrant  
11 ca breast-upper,outer quadrant  
12 ca breast-lower,outer quadrant  
13 ca breast - axillary tail  
14 ca breast - nos  
15 ca breast - male  
16 carcinoma genital organs  
17 ca cervix uteri - endocervix  
18 ca cervix uteri - exocervix  
19 carcinoma body of uterus  
20 ca uterus nos  
21 ca ovary/uterine adnexa nos  
22 ca vulva  
23 ca penis  
24 ca epididymis/spermatic cord  
25 carcinoma bladder  
26 ca kidney/other urinary organs  
27 ca kidney  
28 ca kidney/urinary organs nos  
29 ca genital organs nos  
30 ca - unspecified site nos  
31 ca cerebrum  
32 ca thyroid  
33 other primary ca nos  
34 other primary carcinomas  
35 ca skin - head/neck  
36 ca lymph nodes - secondary  
37 secondary nodes - head/neck  
38 secondary nodes -intrathoracic  
39 secondary nodes - intra.abdom.  
40 secondary nodes - axilla/arm  
41 secondary nodes - inguinal/leg  
42 secondary nodes - intrapelvic  
43 secondary nodes - multiple  
44 secondary nodes nos  
45 secondary ca git  
46 secondary ca lung  
47 secondary ca liver  
48 secondary ca - specified sites  
49 secondary ca kidney  
50 secondary ca skin

1  
2 secondary ca brain/spinal cord  
3 secondary ca ovary  
4 secondary ca nos  
5 disseminated ca -unspecif site  
6 ca - unspecified site  
7 carcinoma in situ breast  
8 carcinoma in situ cervix uteri  
9 ca in situ bladder - papilloma  
10 hydatidiform mole - malignant  
11 unspecified neoplasms nos  
12 unspecified neoplasms  
13 tumour nos  
14 malignant neoplasm nos  
15 malignant neoplasms  
16 metastatic carcinoma  
17 other neoplasms  
18 tumour of uterine body  
19 osteitis deformans - paget's  
20 sternocleidomastoid anomaly  
21 [rfc] cancer of the prostate  
22 [rfc] cancer of the rectum  
23 [rfc] cancer of the testes  
24 [rfc] cancer of the ovary  
25 [rfc] cancer of the uterus  
26 [rfc] cancer of the cervix  
27 [rfc] cancer of the vagina & vulva  
28 [rfc] lung cancer  
29 [rfc] cancer of the larynx  
30 [rfc] neoplasm  
31 [rfc] bowel cancer  
32 [rfc] breast cancer  
33 [rfc] cancer of the thyroid  
34 [rfc] cancer of the eye  
35 [rfc] cancer of the stomach  
36 [rfc] liver cancer  
37 [rfc] cancer of the oesophagus  
38 [rfc] cancer of the mouth  
39 [rfc] neoplasm  
40 [rfc] cancer  
41 [rfc] malignant wound  
42 [rfc] cancer prevention  
43 [v]ph of cervical intraepithelial neoplasia, grade i  
44 [v]ph of cervical intraepithelial neoplasia grade ii  
45 [v]ph of cervical intraepithelial neoplasia, grade iii  
46 transitional cell ca bladder  
47 hypereosinophilic syndrome  
48 transurethral bladder excision  
49 adenocarcinoma of rectum  
50 cancer medication review  
51 cancer review administration



1  
2 cancer review invite 1  
3 cancer review invite 2  
4 cancer review invite 3  
5 transitional cell papilloma of bladder  
6 lethal midline granuloma  
7 malignant neoplasm of endometrium  
8 recurrence of cancer confirmed  
9 cytotoxic bladder instillation  
10 secondary ca git  
11 ca - unspecified site  
12 disseminated ca -unspecif site  
13 malignant neoplasm nos  
14 sternocleidomastoid anomaly  
15 melanoma of skin nos  
16 ca skin - other nos  
17 ca breast - nos  
18 ca uterus nos  
19 unspecified neoplasms nos  
20  
21  
22  
23  
24  
25  
26  
27  
28  
29  
30  
31  
32  
33  
34  
35  
36  
37  
38  
39  
40  
41  
42  
43  
44  
45  
46  
47  
48  
49  
50  
51  
52  
53  
54  
55  
56  
57  
58  
59  
60

For peer review only

|    | ICD-10 code | Term                                                                           |
|----|-------------|--------------------------------------------------------------------------------|
| 1  |             |                                                                                |
| 2  |             |                                                                                |
| 3  | C00.0       | Malignant neoplasm: External upper lip                                         |
| 4  | C00.1       | Malignant neoplasm: External lower lip                                         |
| 5  | C00.2       | Malignant neoplasm: External lip, unspecified                                  |
| 6  |             |                                                                                |
| 7  | C00.3       | Malignant neoplasm: Upper lip, inner aspect                                    |
| 8  | C00.4       | Malignant neoplasm: Lower lip, inner aspect                                    |
| 9  | C00.5       | Malignant neoplasm: Lip, unspecified, inner aspect                             |
| 10 | C00.6       | Malignant neoplasm: Commissure of lip                                          |
| 11 | C00.8       | Malignant neoplasm: Overlapping lesion of lip                                  |
| 12 | C00.9       | Malignant neoplasm: Lip, unspecified                                           |
| 13 |             |                                                                                |
| 14 | C01         | Malignant neoplasm of base of tongue                                           |
| 15 | C02.0       | Malignant neoplasm: Dorsal surface of tongue                                   |
| 16 | C02.1       | Malignant neoplasm: Border of tongue                                           |
| 17 | C02.2       | Malignant neoplasm: Ventral surface of tongue                                  |
| 18 |             |                                                                                |
| 19 | C02.3       | Malignant neoplasm: Anterior two-thirds of tongue, part unspecified            |
| 20 | C02.4       | Malignant neoplasm: Lingual tonsil                                             |
| 21 | C02.8       | Malignant neoplasm: Overlapping lesion of tongue                               |
| 22 | C02.9       | Malignant neoplasm: Tongue, unspecified                                        |
| 23 |             |                                                                                |
| 24 | C03.0       | Malignant neoplasm: Upper gum                                                  |
| 25 | C03.1       | Malignant neoplasm: Lower gum                                                  |
| 26 | C03.9       | Malignant neoplasm: Gum, unspecified                                           |
| 27 | C04.0       | Malignant neoplasm: Anterior floor of mouth                                    |
| 28 | C04.1       | Malignant neoplasm: Lateral floor of mouth                                     |
| 29 |             |                                                                                |
| 30 | C04.8       | Malignant neoplasm: Overlapping lesion of floor of mouth                       |
| 31 | C04.9       | Malignant neoplasm: Floor of mouth, unspecified                                |
| 32 | C05.0       | Malignant neoplasm: Hard palate                                                |
| 33 | C05.1       | Malignant neoplasm: Soft palate                                                |
| 34 | C05.2       | Malignant neoplasm: Uvula                                                      |
| 35 |             |                                                                                |
| 36 | C05.8       | Malignant neoplasm: Overlapping lesion of palate                               |
| 37 | C05.9       | Malignant neoplasm: Palate, unspecified                                        |
| 38 | C06.0       | Malignant neoplasm: Cheek mucosa                                               |
| 39 | C06.1       | Malignant neoplasm: Vestibule of mouth                                         |
| 40 | C06.2       | Malignant neoplasm: Retromolar area                                            |
| 41 |             |                                                                                |
| 42 | C06.8       | Malignant neoplasm: Overlapping lesion of other and unspecified parts of mouth |
| 43 | C06.9       | Malignant neoplasm: Mouth, unspecified                                         |
| 44 | C07         | Malignant neoplasm of parotid gland                                            |
| 45 | C08.0       | Malignant neoplasm: Submandibular gland                                        |
| 46 | C08.1       | Malignant neoplasm: Sublingual gland                                           |
| 47 |             |                                                                                |
| 48 | C08.8       | Malignant neoplasm: Overlapping lesion of major salivary glands                |
| 49 | C08.9       | Malignant neoplasm: Major salivary gland, unspecified                          |
| 50 | C09.0       | Malignant neoplasm: Tonsillar fossa                                            |
| 51 | C09.1       | Malignant neoplasm: Tonsillar pillar (anterior)(posterior)                     |
| 52 | C09.8       | Malignant neoplasm: Overlapping lesion of tonsil                               |
| 53 | C09.9       | Malignant neoplasm: Tonsil, unspecified                                        |
| 54 |             |                                                                                |
| 55 | C10.0       | Malignant neoplasm: Vallecula                                                  |
| 56 | C10.1       | Malignant neoplasm: Anterior surface of epiglottis                             |
| 57 | C10.2       | Malignant neoplasm: Lateral wall of oropharynx                                 |
| 58 | C10.3       | Malignant neoplasm: Posterior wall of oropharynx                               |
| 59 | C10.4       | Malignant neoplasm: Branchial cleft                                            |
| 60 | C10.8       | Malignant neoplasm: Overlapping lesion of oropharynx                           |

|    |       |                                                                        |
|----|-------|------------------------------------------------------------------------|
| 1  |       |                                                                        |
| 2  | C10.9 | Malignant neoplasm: Oropharynx, unspecified                            |
| 3  | C11.0 | Malignant neoplasm: Superior wall of nasopharynx                       |
| 4  | C11.1 | Malignant neoplasm: Posterior wall of nasopharynx                      |
| 5  | C11.2 | Malignant neoplasm: Lateral wall of nasopharynx                        |
| 6  | C11.3 | Malignant neoplasm: Anterior wall of nasopharynx                       |
| 7  | C11.8 | Malignant neoplasm: Overlapping lesion of nasopharynx                  |
| 8  | C11.9 | Malignant neoplasm: Nasopharynx, unspecified                           |
| 9  | C12   | Malignant neoplasm of piriform sinus                                   |
| 10 | C13.0 | Malignant neoplasm: Postcricoid region                                 |
| 11 | C13.1 | Malignant neoplasm: Aryepiglottic fold, hypopharyngeal aspect          |
| 12 | C13.2 | Malignant neoplasm: Posterior wall of hypopharynx                      |
| 13 | C13.8 | Malignant neoplasm: Overlapping lesion of hypopharynx                  |
| 14 | C13.9 | Malignant neoplasm: Hypopharynx, unspecified                           |
| 15 | C14.0 | Malignant neoplasm: Pharynx, unspecified                               |
| 16 | C14.2 | Malignant neoplasm: Waldeyer ring                                      |
| 17 | C14.8 | Malignant neoplasm: Overlapping lesion of lip, oral cavity and pharynx |
| 18 | C15.0 | Malignant neoplasm: Cervical part of oesophagus                        |
| 19 | C15.1 | Malignant neoplasm: Thoracic part of oesophagus                        |
| 20 | C15.2 | Malignant neoplasm: Abdominal part of oesophagus                       |
| 21 | C15.3 | Malignant neoplasm: Upper third of oesophagus                          |
| 22 | C15.4 | Malignant neoplasm: Middle third of oesophagus                         |
| 23 | C15.5 | Malignant neoplasm: Lower third of oesophagus                          |
| 24 | C15.8 | Malignant neoplasm: Overlapping lesion of oesophagus                   |
| 25 | C15.9 | Malignant neoplasm: Oesophagus, unspecified                            |
| 26 | C16.0 | Malignant neoplasm: Cardia                                             |
| 27 | C16.1 | Malignant neoplasm: Fundus of stomach                                  |
| 28 | C16.2 | Malignant neoplasm: Body of stomach                                    |
| 29 | C16.3 | Malignant neoplasm: Pyloric antrum                                     |
| 30 | C16.4 | Malignant neoplasm: Pylorus                                            |
| 31 | C16.5 | Malignant neoplasm: Lesser curvature of stomach, unspecified           |
| 32 | C16.6 | Malignant neoplasm: Greater curvature of stomach, unspecified          |
| 33 | C16.8 | Malignant neoplasm: Overlapping lesion of stomach                      |
| 34 | C16.9 | Malignant neoplasm: Stomach, unspecified                               |
| 35 | C17.0 | Malignant neoplasm: Duodenum                                           |
| 36 | C17.1 | Malignant neoplasm: Jejunum                                            |
| 37 | C17.2 | Malignant neoplasm: Ileum                                              |
| 38 | C17.3 | Malignant neoplasm: Meckel diverticulum                                |
| 39 | C17.8 | Malignant neoplasm: Overlapping lesion of small intestine              |
| 40 | C17.9 | Malignant neoplasm: Small intestine, unspecified                       |
| 41 | C18.0 | Malignant neoplasm: Caecum                                             |
| 42 | C18.1 | Malignant neoplasm: Appendix                                           |
| 43 | C18.2 | Malignant neoplasm: Ascending colon                                    |
| 44 | C18.3 | Malignant neoplasm: Hepatic flexure                                    |
| 45 | C18.4 | Malignant neoplasm: Transverse colon                                   |
| 46 | C18.5 | Malignant neoplasm: Splenic flexure                                    |
| 47 | C18.6 | Malignant neoplasm: Descending colon                                   |
| 48 | C18.7 | Malignant neoplasm: Sigmoid colon                                      |
| 49 | C18.8 | Malignant neoplasm: Overlapping lesion of colon                        |
| 50 | C18.9 | Malignant neoplasm: Colon, unspecified                                 |
| 51 | C19   | Malignant neoplasm of rectosigmoid junction                            |

|    |       |                                                                       |
|----|-------|-----------------------------------------------------------------------|
| 1  |       |                                                                       |
| 2  | C20   | Malignant neoplasm of rectum                                          |
| 3  | C21.0 | Malignant neoplasm: Anus, unspecified                                 |
| 4  | C21.1 | Malignant neoplasm: Anal canal                                        |
| 5  | C21.2 | Malignant neoplasm: Cloacogenic zone                                  |
| 6  |       |                                                                       |
| 7  | C21.8 | Malignant neoplasm: Overlapping lesion of rectum, anus and anal canal |
| 8  | C22.0 | Malignant neoplasm: Liver cell carcinoma                              |
| 9  | C22.1 | Malignant neoplasm: Intrahepatic bile duct carcinoma                  |
| 10 | C22.2 | Malignant neoplasm: Hepatoblastoma                                    |
| 11 | C22.3 | Malignant neoplasm: Angiosarcoma of liver                             |
| 12 | C22.4 | Malignant neoplasm: Other sarcomas of liver                           |
| 13 | C22.7 | Malignant neoplasm: Other specified carcinomas of liver               |
| 14 | C22.9 | Malignant neoplasm: Liver, unspecified                                |
| 15 | C23   | Malignant neoplasm of gallbladder                                     |
| 16 | C24.0 | Malignant neoplasm: Extrahepatic bile duct                            |
| 17 |       |                                                                       |
| 18 | C24.1 | Malignant neoplasm: Ampulla of Vater                                  |
| 19 | C24.8 | Malignant neoplasm: Overlapping lesion of biliary tract               |
| 20 | C24.9 | Malignant neoplasm: Biliary tract, unspecified                        |
| 21 | C25.0 | Malignant neoplasm: Head of pancreas                                  |
| 22 | C25.1 | Malignant neoplasm: Body of pancreas                                  |
| 23 | C25.2 | Malignant neoplasm: Tail of pancreas                                  |
| 24 | C25.3 | Malignant neoplasm: Pancreatic duct                                   |
| 25 | C25.4 | Malignant neoplasm: Endocrine pancreas                                |
| 26 | C25.7 | Malignant neoplasm: Other parts of pancreas                           |
| 27 | C25.8 | Malignant neoplasm: Overlapping lesion of pancreas                    |
| 28 | C25.9 | Malignant neoplasm: Pancreas, unspecified                             |
| 29 | C26.0 | Malignant neoplasm: Intestinal tract, part unspecified                |
| 30 | C26.1 | Malignant neoplasm: Spleen                                            |
| 31 | C26.8 | Malignant neoplasm: Overlapping lesion of digestive system            |
| 32 | C26.9 | Malignant neoplasm: Ill-defined sites within the digestive system     |
| 33 | C30.0 | Malignant neoplasm: Nasal cavity                                      |
| 34 | C30.1 | Malignant neoplasm: Middle ear                                        |
| 35 | C31.0 | Malignant neoplasm: Maxillary sinus                                   |
| 36 | C31.1 | Malignant neoplasm: Ethmoidal sinus                                   |
| 37 | C31.2 | Malignant neoplasm: Frontal sinus                                     |
| 38 | C31.3 | Malignant neoplasm: Sphenoidal sinus                                  |
| 39 | C31.8 | Malignant neoplasm: Overlapping lesion of accessory sinuses           |
| 40 | C31.9 | Malignant neoplasm: Accessory sinus, unspecified                      |
| 41 | C32.0 | Malignant neoplasm: Glottis                                           |
| 42 | C32.1 | Malignant neoplasm: Supraglottis                                      |
| 43 | C32.2 | Malignant neoplasm: Subglottis                                        |
| 44 | C32.3 | Malignant neoplasm: Laryngeal cartilage                               |
| 45 | C32.8 | Malignant neoplasm: Overlapping lesion of larynx                      |
| 46 | C32.9 | Malignant neoplasm: Larynx, unspecified                               |
| 47 | C33   | Malignant neoplasm of trachea                                         |
| 48 | C34.0 | Malignant neoplasm: Main bronchus                                     |
| 49 | C34.1 | Malignant neoplasm: Upper lobe, bronchus or lung                      |
| 50 | C34.2 | Malignant neoplasm: Middle lobe, bronchus or lung                     |
| 51 | C34.3 | Malignant neoplasm: Lower lobe, bronchus or lung                      |
| 52 | C34.8 | Malignant neoplasm: Overlapping lesion of bronchus and lung           |
| 53 | C34.9 | Malignant neoplasm: Bronchus or lung, unspecified                     |

|    |       |                                                                                 |
|----|-------|---------------------------------------------------------------------------------|
| 1  |       |                                                                                 |
| 2  | C37   | Malignant neoplasm of thymus                                                    |
| 3  | C38.0 | Malignant neoplasm: Heart                                                       |
| 4  | C38.1 | Malignant neoplasm: Anterior mediastinum                                        |
| 5  | C38.2 | Malignant neoplasm: Posterior mediastinum                                       |
| 6  | C38.3 | Malignant neoplasm: Mediastinum, part unspecified                               |
| 7  | C38.4 | Malignant neoplasm: Pleura                                                      |
| 8  | C38.8 | Malignant neoplasm: Overlapping lesion of heart, mediastinum and pleura         |
| 9  | C39.0 | Malignant neoplasm: Upper respiratory tract, part unspecified                   |
| 10 | C39.8 | Malignant neoplasm: Overlapping lesion of respiratory and intrathoracic organs  |
| 11 | C39.9 | Malignant neoplasm: Ill-defined sites within the respiratory system             |
| 12 | C40.0 | Malignant neoplasm: Scapula and long bones of upper limb                        |
| 13 | C40.1 | Malignant neoplasm: Short bones of upper limb                                   |
| 14 | C40.2 | Malignant neoplasm: Long bones of lower limb                                    |
| 15 | C40.3 | Malignant neoplasm: Short bones of lower limb                                   |
| 16 | C40.8 | Malignant neoplasm: Overlapping lesion of bone and articular cartilage of limbs |
| 17 | C40.9 | Malignant neoplasm: Bone and articular cartilage of limb, unspecified           |
| 18 | C41.0 | Malignant neoplasm: Bones of skull and face                                     |
| 19 | C41.1 | Malignant neoplasm: Mandible                                                    |
| 20 | C41.2 | Malignant neoplasm: Vertebral column                                            |
| 21 | C41.3 | Malignant neoplasm: Ribs, sternum and clavicle                                  |
| 22 | C41.4 | Malignant neoplasm: Pelvic bones, sacrum and coccyx                             |
| 23 | C41.8 | Malignant neoplasm: Overlapping lesion of bone and articular cartilage          |
| 24 | C41.9 | Malignant neoplasm: Bone and articular cartilage, unspecified                   |
| 25 | C43.0 | Malignant neoplasm: Malignant melanoma of lip                                   |
| 26 | C43.1 | Malignant neoplasm: Malignant melanoma of eyelid, including canthus             |
| 27 | C43.2 | Malignant neoplasm: Malignant melanoma of ear and external auricular canal      |
| 28 | C43.3 | Malignant neoplasm: Malignant melanoma of other and unspecified parts of face   |
| 29 | C43.4 | Malignant neoplasm: Malignant melanoma of scalp and neck                        |
| 30 | C43.5 | Malignant neoplasm: Malignant melanoma of trunk                                 |
| 31 | C43.6 | Malignant neoplasm: Malignant melanoma of upper limb, including shoulder        |
| 32 | C43.7 | Malignant neoplasm: Malignant melanoma of lower limb, including hip             |
| 33 | C43.8 | Malignant neoplasm: Overlapping malignant melanoma of skin                      |
| 34 | C43.9 | Malignant neoplasm: Malignant melanoma of skin, unspecified                     |
| 35 | C44.0 | Malignant neoplasm: Skin of lip                                                 |
| 36 | C44.1 | Malignant neoplasm: Skin of eyelid, including canthus                           |
| 37 | C44.2 | Malignant neoplasm: Skin of ear and external auricular canal                    |
| 38 | C44.3 | Malignant neoplasm: Skin of other and unspecified parts of face                 |
| 39 | C44.4 | Malignant neoplasm: Skin of scalp and neck                                      |
| 40 | C44.5 | Malignant neoplasm: Skin of trunk                                               |
| 41 | C44.6 | Malignant neoplasm: Skin of upper limb, including shoulder                      |
| 42 | C44.7 | Malignant neoplasm: Skin of lower limb, including hip                           |
| 43 | C44.8 | Malignant neoplasm: Overlapping lesion of skin                                  |
| 44 | C44.9 | Malignant neoplasm: Malignant neoplasm of skin, unspecified                     |
| 45 | C45.0 | Mesothelioma of pleura                                                          |
| 46 | C45.1 | Mesothelioma of peritoneum                                                      |
| 47 | C45.2 | Mesothelioma of pericardium                                                     |
| 48 | C45.7 | Mesothelioma of other sites                                                     |
| 49 | C45.9 | Mesothelioma, unspecified                                                       |
| 50 | C46.0 | Kaposi sarcoma of skin                                                          |
| 51 | C46.1 | Kaposi sarcoma of soft tissue                                                   |

|    |       |                                                                                          |
|----|-------|------------------------------------------------------------------------------------------|
| 1  |       |                                                                                          |
| 2  | C46.2 | Kaposi sarcoma of palate                                                                 |
| 3  | C46.3 | Kaposi sarcoma of lymph nodes                                                            |
| 4  | C46.7 | Kaposi sarcoma of other sites                                                            |
| 5  | C46.8 | Kaposi sarcoma of multiple organs                                                        |
| 6  | C46.9 | Kaposi sarcoma, unspecified                                                              |
| 7  |       |                                                                                          |
| 8  | C47.0 | Malignant neoplasm: Peripheral nerves of head, face and neck                             |
| 9  | C47.1 | Malignant neoplasm: Peripheral nerves of upper limb, including shoulder                  |
| 10 | C47.2 | Malignant neoplasm: Peripheral nerves of lower limb, including hip                       |
| 11 | C47.3 | Malignant neoplasm: Peripheral nerves of thorax                                          |
| 12 | C47.4 | Malignant neoplasm: Peripheral nerves of abdomen                                         |
| 13 | C47.5 | Malignant neoplasm: Peripheral nerves of pelvis                                          |
| 14 | C47.6 | Malignant neoplasm: Peripheral nerves of trunk, unspecified                              |
| 15 | C47.8 | Malignant neoplasm: Overlapping lesion of peripheral nerves and autonomic nervous system |
| 16 | C47.9 | Malignant neoplasm: Peripheral nerves and autonomic nervous system, unspecified          |
| 17 |       |                                                                                          |
| 18 | C48.0 | Malignant neoplasm: Retroperitoneum                                                      |
| 19 | C48.1 | Malignant neoplasm: Specified parts of peritoneum                                        |
| 20 | C48.2 | Malignant neoplasm: Peritoneum, unspecified                                              |
| 21 |       |                                                                                          |
| 22 | C48.8 | Malignant neoplasm: Overlapping lesion of retroperitoneum and peritoneum                 |
| 23 | C49.0 | Malignant neoplasm: Connective and soft tissue of head, face and neck                    |
| 24 | C49.1 | Malignant neoplasm: Connective and soft tissue of upper limb, including shoulder         |
| 25 | C49.2 | Malignant neoplasm: Connective and soft tissue of lower limb, including hip              |
| 26 | C49.3 | Malignant neoplasm: Connective and soft tissue of thorax                                 |
| 27 | C49.4 | Malignant neoplasm: Connective and soft tissue of abdomen                                |
| 28 | C49.5 | Malignant neoplasm: Connective and soft tissue of pelvis                                 |
| 29 | C49.6 | Malignant neoplasm: Connective and soft tissue of trunk, unspecified                     |
| 30 | C49.8 | Malignant neoplasm: Overlapping lesion of connective and soft tissue                     |
| 31 | C49.9 | Malignant neoplasm: Connective and soft tissue, unspecified                              |
| 32 | C50.0 | Malignant neoplasm: Nipple and areola                                                    |
| 33 | C50.1 | Malignant neoplasm: Central portion of breast                                            |
| 34 | C50.2 | Malignant neoplasm: Upper-inner quadrant of breast                                       |
| 35 | C50.3 | Malignant neoplasm: Lower-inner quadrant of breast                                       |
| 36 | C50.4 | Malignant neoplasm: Upper-outer quadrant of breast                                       |
| 37 | C50.5 | Malignant neoplasm: Lower-outer quadrant of breast                                       |
| 38 | C50.6 | Malignant neoplasm: Axillary tail of breast                                              |
| 39 | C50.8 | Malignant neoplasm: Overlapping lesion of breast                                         |
| 40 | C50.9 | Malignant neoplasm: Breast, unspecified                                                  |
| 41 | C51.0 | Malignant neoplasm: Labium majus                                                         |
| 42 | C51.1 | Malignant neoplasm: Labium minus                                                         |
| 43 | C51.2 | Malignant neoplasm: Clitoris                                                             |
| 44 | C51.8 | Malignant neoplasm: Overlapping lesion of vulva                                          |
| 45 | C51.9 | Malignant neoplasm: Vulva, unspecified                                                   |
| 46 | C52   | Malignant neoplasm of vagina                                                             |
| 47 | C53.0 | Malignant neoplasm: Endocervix                                                           |
| 48 | C53.1 | Malignant neoplasm: Exocervix                                                            |
| 49 | C53.8 | Malignant neoplasm: Overlapping lesion of cervix uteri                                   |
| 50 | C53.9 | Malignant neoplasm: Cervix uteri, unspecified                                            |
| 51 | C54.0 | Malignant neoplasm: Isthmus uteri                                                        |
| 52 | C54.1 | Malignant neoplasm: Endometrium                                                          |
| 53 | C54.2 | Malignant neoplasm: Myometrium                                                           |
| 54 | C54.3 | Malignant neoplasm: Fundus uteri                                                         |



|    |       |                                                                 |
|----|-------|-----------------------------------------------------------------|
| 1  |       |                                                                 |
| 2  | C54.8 | Malignant neoplasm: Overlapping lesion of corpus uteri          |
| 3  | C54.9 | Malignant neoplasm: Corpus uteri, unspecified                   |
| 4  | C55   | Malignant neoplasm of uterus, part unspecified                  |
| 5  | C56   | Malignant neoplasm of ovary                                     |
| 6  | C57.0 | Malignant neoplasm: Fallopian tube                              |
| 7  | C57.1 | Malignant neoplasm: Broad ligament                              |
| 8  | C57.2 | Malignant neoplasm: Round ligament                              |
| 9  | C57.3 | Malignant neoplasm: Parametrium                                 |
| 10 | C57.4 | Malignant neoplasm: Uterine adnexa, unspecified                 |
| 11 | C57.7 | Malignant neoplasm: Other specified female genital organs       |
| 12 | C57.8 | Malignant neoplasm: Overlapping lesion of female genital organs |
| 13 | C57.9 | Malignant neoplasm: Female genital organ, unspecified           |
| 14 | C58   | Malignant neoplasm of placenta                                  |
| 15 | C60.0 | Malignant neoplasm: Prepuce                                     |
| 16 | C60.1 | Malignant neoplasm: Glans penis                                 |
| 17 | C60.2 | Malignant neoplasm: Body of penis                               |
| 18 | C60.8 | Malignant neoplasm: Overlapping lesion of penis                 |
| 19 | C60.9 | Malignant neoplasm: Penis, unspecified                          |
| 20 | C62.0 | Malignant neoplasm: Undescended testis                          |
| 21 | C62.1 | Malignant neoplasm: Descended testis                            |
| 22 | C62.9 | Malignant neoplasm: Testis, unspecified                         |
| 23 | C63.0 | Malignant neoplasm: Epididymis                                  |
| 24 | C63.1 | Malignant neoplasm: Spermatic cord                              |
| 25 | C63.2 | Malignant neoplasm: Scrotum                                     |
| 26 | C63.7 | Malignant neoplasm: Other specified male genital organs         |
| 27 | C63.8 | Malignant neoplasm: Overlapping lesion of male genital organs   |
| 28 | C63.9 | Malignant neoplasm: Male genital organ, unspecified             |
| 29 | C64   | Malignant neoplasm of kidney, except renal pelvis               |
| 30 | C65   | Malignant neoplasm of renal pelvis                              |
| 31 | C66   | Malignant neoplasm of ureter                                    |
| 32 | C68.0 | Malignant neoplasm: Urethra                                     |
| 33 | C68.1 | Malignant neoplasm: Paraurethral gland                          |
| 34 | C68.8 | Malignant neoplasm: Overlapping lesion of urinary organs        |
| 35 | C68.9 | Malignant neoplasm: Urinary organ, unspecified                  |
| 36 | C69.0 | Malignant neoplasm: Conjunctiva                                 |
| 37 | C69.1 | Malignant neoplasm: Cornea                                      |
| 38 | C69.2 | Malignant neoplasm: Retina                                      |
| 39 | C69.3 | Malignant neoplasm: Choroid                                     |
| 40 | C69.4 | Malignant neoplasm: Ciliary body                                |
| 41 | C69.5 | Malignant neoplasm: Lacrimal gland and duct                     |
| 42 | C69.6 | Malignant neoplasm: Orbit                                       |
| 43 | C69.8 | Malignant neoplasm: Overlapping lesion of eye and adnexa        |
| 44 | C69.9 | Malignant neoplasm: Eye, unspecified                            |
| 45 | C70.0 | Malignant neoplasm: Cerebral meninges                           |
| 46 | C70.1 | Malignant neoplasm: Spinal meninges                             |
| 47 | C70.9 | Malignant neoplasm: Meninges, unspecified                       |
| 48 | C71.0 | Malignant neoplasm: Cerebrum, except lobes and ventricles       |
| 49 | C71.1 | Malignant neoplasm: Frontal lobe                                |
| 50 | C71.2 | Malignant neoplasm: Temporal lobe                               |
| 51 | C71.3 | Malignant neoplasm: Parietal lobe                               |

|    |       |                                                                                                      |
|----|-------|------------------------------------------------------------------------------------------------------|
| 1  |       |                                                                                                      |
| 2  | C71.4 | Malignant neoplasm: Occipital lobe                                                                   |
| 3  | C71.5 | Malignant neoplasm: Cerebral ventricle                                                               |
| 4  | C71.6 | Malignant neoplasm: Cerebellum                                                                       |
| 5  | C71.7 | Malignant neoplasm: Brain stem                                                                       |
| 6  | C71.8 | Malignant neoplasm: Overlapping lesion of brain                                                      |
| 7  | C71.9 | Malignant neoplasm: Brain, unspecified                                                               |
| 8  | C72.0 | Malignant neoplasm: Spinal cord                                                                      |
| 9  | C72.2 | Malignant neoplasm: Olfactory nerve                                                                  |
| 10 | C72.3 | Malignant neoplasm: Optic nerve                                                                      |
| 11 | C72.4 | Malignant neoplasm: Acoustic nerve                                                                   |
| 12 | C72.5 | Malignant neoplasm: Other and unspecified cranial nerves                                             |
| 13 | C72.8 | Malignant neoplasm: Overlapping lesion of brain and other parts of central nervous system            |
| 14 | C72.9 | Malignant neoplasm: Central nervous system, unspecified                                              |
| 15 | C74.0 | Malignant neoplasm: Cortex of adrenal gland                                                          |
| 16 | C74.1 | Malignant neoplasm: Medulla of adrenal gland                                                         |
| 17 | C74.9 | Malignant neoplasm: Adrenal gland, unspecified                                                       |
| 18 | C75.0 | Malignant neoplasm: Parathyroid gland                                                                |
| 19 | C75.1 | Malignant neoplasm: Pituitary gland                                                                  |
| 20 | C75.2 | Malignant neoplasm: Craniopharyngeal duct                                                            |
| 21 | C75.3 | Malignant neoplasm: Pineal gland                                                                     |
| 22 | C75.4 | Malignant neoplasm: Carotid body                                                                     |
| 23 | C75.5 | Malignant neoplasm: Aortic body and other paraganglia                                                |
| 24 | C75.8 | Malignant neoplasm: Pluriglandular involvement, unspecified                                          |
| 25 | C75.9 | Malignant neoplasm: Endocrine gland, unspecified                                                     |
| 26 | C76.0 | Malignant neoplasm of other and ill-defined sites: Head, face and neck                               |
| 27 | C76.1 | Malignant neoplasm of other and ill-defined sites: Thorax                                            |
| 28 | C76.2 | Malignant neoplasm of other and ill-defined sites: Abdomen                                           |
| 29 | C76.3 | Malignant neoplasm of other and ill-defined sites: Pelvis                                            |
| 30 | C76.4 | Malignant neoplasm of other and ill-defined sites: Upper limb                                        |
| 31 | C76.5 | Malignant neoplasm of other and ill-defined sites: Lower limb                                        |
| 32 | C76.7 | Malignant neoplasm of other and ill-defined sites: Other ill-defined sites                           |
| 33 | C76.8 | Malignant neoplasm of other and ill-defined sites: Overlapping lesion of other and ill-defined sites |
| 34 | C77.0 | Secondary and unspecified malignant neoplasm: Lymph nodes of head, face and neck                     |
| 35 | C77.1 | Secondary and unspecified malignant neoplasm: Intrathoracic lymph nodes                              |
| 36 | C77.2 | Secondary and unspecified malignant neoplasm: Intra-abdominal lymph nodes                            |
| 37 | C77.3 | Secondary and unspecified malignant neoplasm: Axillary and upper limb lymph nodes                    |
| 38 | C77.4 | Secondary and unspecified malignant neoplasm: Inguinal and lower limb lymph nodes                    |
| 39 | C77.5 | Secondary and unspecified malignant neoplasm: Intrapelvic lymph nodes                                |
| 40 | C77.8 | Secondary and unspecified malignant neoplasm: Lymph nodes of multiple regions                        |
| 41 | C77.9 | Secondary and unspecified malignant neoplasm: Lymph node, unspecified                                |
| 42 | C78.0 | Secondary malignant neoplasm of lung                                                                 |
| 43 | C78.1 | Secondary malignant neoplasm of mediastinum                                                          |
| 44 | C78.2 | Secondary malignant neoplasm of pleura                                                               |
| 45 | C78.3 | Secondary malignant neoplasm of other and unspecified respiratory organs                             |
| 46 | C78.4 | Secondary malignant neoplasm of small intestine                                                      |
| 47 | C78.5 | Secondary malignant neoplasm of large intestine and rectum                                           |
| 48 | C78.6 | Secondary malignant neoplasm of retroperitoneum and peritoneum                                       |
| 49 | C78.7 | Secondary malignant neoplasm of liver and intrahepatic bile duct                                     |
| 50 | C78.8 | Secondary malignant neoplasm of other and unspecified digestive organs                               |
| 51 | C79.0 | Secondary malignant neoplasm of kidney and renal pelvis                                              |



|    |       |                                                                                  |
|----|-------|----------------------------------------------------------------------------------|
| 1  |       |                                                                                  |
| 2  | C79.1 | Secondary malignant neoplasm of bladder and other and unspecified urinary organs |
| 3  | C79.2 | Secondary malignant neoplasm of skin                                             |
| 4  | C79.3 | Secondary malignant neoplasm of brain and cerebral meninges                      |
| 5  | C79.4 | Secondary malignant neoplasm of other and unspecified parts of nervous system    |
| 6  | C79.5 | Secondary malignant neoplasm of bone and bone marrow                             |
| 7  | C79.6 | Secondary malignant neoplasm of ovary                                            |
| 8  | C79.7 | Secondary malignant neoplasm of adrenal gland                                    |
| 9  | C79.8 | Secondary malignant neoplasm of other specified sites                            |
| 10 | C79.9 | Secondary malignant neoplasm, unspecified site                                   |
| 11 | C80.0 | Malignant neoplasm, primary site unknown, so stated                              |
| 12 | C80.9 | Malignant neoplasm, primary site unspecified                                     |
| 13 |       |                                                                                  |
| 14 |       |                                                                                  |
| 15 |       |                                                                                  |
| 16 |       |                                                                                  |
| 17 |       |                                                                                  |
| 18 |       |                                                                                  |
| 19 |       |                                                                                  |
| 20 |       |                                                                                  |
| 21 |       |                                                                                  |
| 22 |       |                                                                                  |
| 23 |       |                                                                                  |
| 24 |       |                                                                                  |
| 25 |       |                                                                                  |
| 26 |       |                                                                                  |
| 27 |       |                                                                                  |
| 28 |       |                                                                                  |
| 29 |       |                                                                                  |
| 30 |       |                                                                                  |
| 31 |       |                                                                                  |
| 32 |       |                                                                                  |
| 33 |       |                                                                                  |
| 34 |       |                                                                                  |
| 35 |       |                                                                                  |
| 36 |       |                                                                                  |
| 37 |       |                                                                                  |
| 38 |       |                                                                                  |
| 39 |       |                                                                                  |
| 40 |       |                                                                                  |
| 41 |       |                                                                                  |
| 42 |       |                                                                                  |
| 43 |       |                                                                                  |
| 44 |       |                                                                                  |
| 45 |       |                                                                                  |
| 46 |       |                                                                                  |
| 47 |       |                                                                                  |
| 48 |       |                                                                                  |
| 49 |       |                                                                                  |
| 50 |       |                                                                                  |
| 51 |       |                                                                                  |
| 52 |       |                                                                                  |
| 53 |       |                                                                                  |
| 54 |       |                                                                                  |
| 55 |       |                                                                                  |
| 56 |       |                                                                                  |
| 57 |       |                                                                                  |
| 58 |       |                                                                                  |
| 59 |       |                                                                                  |
| 60 |       |                                                                                  |

For peer review only

1  
2  
3  
4  
5  
6  
7  
8  
9  
10  
11  
12  
13  
14  
15  
16  
17  
18  
19  
20  
21  
22  
23  
24  
25  
26  
27  
28  
29  
30  
31  
32  
33  
34  
35  
36  
37  
38  
39  
40  
41  
42  
43  
44  
45  
46  
47  
48  
49  
50  
51  
52  
53  
54  
55  
56  
57  
58  
59  
60

For peer review only

1  
2  
3  
4  
5  
6  
7  
8  
9  
10  
11  
12  
13  
14  
15  
16  
17  
18  
19  
20  
21  
22  
23  
24  
25  
26  
27  
28  
29  
30  
31  
32  
33  
34  
35  
36  
37  
38  
39  
40  
41  
42  
43  
44  
45  
46  
47  
48  
49  
50  
51  
52  
53  
54  
55  
56  
57  
58  
59  
60

For peer review only

1  
2  
3  
4  
5  
6  
7  
8  
9  
10  
11  
12  
13  
14  
15  
16  
17  
18  
19  
20  
21  
22  
23  
24  
25  
26  
27  
28  
29  
30  
31  
32  
33  
34  
35  
36  
37  
38  
39  
40  
41  
42  
43  
44  
45  
46  
47  
48  
49  
50  
51  
52  
53  
54  
55  
56  
57  
58  
59  
60

For peer review only

1  
2  
3  
4  
5  
6  
7  
8  
9  
10  
11  
12  
13  
14  
15  
16  
17  
18  
19  
20  
21  
22  
23  
24  
25  
26  
27  
28  
29  
30  
31  
32  
33  
34  
35  
36  
37  
38  
39  
40  
41  
42  
43  
44  
45  
46  
47  
48  
49  
50  
51  
52  
53  
54  
55  
56  
57  
58  
59  
60

For peer review only

1  
2  
3  
4  
5  
6  
7  
8  
9  
10  
11  
12  
13  
14  
15  
16  
17  
18  
19  
20  
21  
22  
23  
24  
25  
26  
27  
28  
29  
30  
31  
32  
33  
34  
35  
36  
37  
38  
39  
40  
41  
42  
43  
44  
45  
46  
47  
48  
49  
50  
51  
52  
53  
54  
55  
56  
57  
58  
59  
60

For peer review only

1  
2  
3  
4  
5  
6  
7  
8  
9  
10  
11  
12  
13  
14  
15  
16  
17  
18  
19  
20  
21  
22  
23  
24  
25  
26  
27  
28  
29  
30  
31  
32  
33  
34  
35  
36  
37  
38  
39  
40  
41  
42  
43  
44  
45  
46  
47  
48  
49  
50  
51  
52  
53  
54  
55  
56  
57  
58  
59  
60

For peer review only

1  
2  
3  
4  
5  
6  
7  
8  
9  
10  
11  
12  
13  
14  
15  
16  
17  
18  
19  
20  
21  
22  
23  
24  
25  
26  
27  
28  
29  
30  
31  
32  
33  
34  
35  
36  
37  
38  
39  
40  
41  
42  
43  
44  
45  
46  
47  
48  
49  
50  
51  
52  
53  
54  
55  
56  
57  
58  
59  
60

tes

For peer review only



1  
2 Medcodeid  
3 16067019  
4 28038011  
5 28040018  
6 29745012  
7 38839013  
8 75861010  
9 110356018  
10 293560010  
11 293566016  
12 293570012  
13 293571011  
14 293828012  
15 293836015  
16 297164011  
17 297554011  
18 301718017  
19 303845017  
20 356485018  
21 356488016  
22 356490015  
23 356491016  
24 356493018  
25 415948012  
26 420648014  
27 455076017  
28 485267014  
29 493961016  
30 1230634013  
31 1235651015  
32 1235653017  
33 1777779015  
34 2477015019  
35 2675336016  
36 480631000006119  
37 666221000006118  
38 666351000006116  
39 682631000006116  
40 821721000006117  
41 1148681000000115  
42 1780351000006112  
43 1846681000006117  
44 2196311000000112  
45 2196531000000112  
46 2196561000000119  
47 2211411000000114  
48 2211441000000110  
49 2211461000000111  
50 2211471000000116  
51 2211521000000119

For peer review only

1  
2 2211531000000117  
3 3181661000006112  
4 3288141000006111  
5 3580531000006116  
6 3618851000006119  
7 3618891000006113  
8 3953811000006116  
9 4770891000006111  
10 5663711000006113  
11 8118601000006117  
12 14071301000006119  
13 354612017  
14 354613010  
15 354615015  
16 354616019  
17 354617011  
18 354618018  
19 354619014  
20 354623018  
21 354624012  
22 354627017  
23 354628010  
24 422992018  
25 384481000006118  
26 1905531000006112  
27 5067801000006115  
28 5094171000006114  
29 5096231000006110  
30 7133411000006113  
31 292274012  
32 313331000006110  
33 399761000006116  
34 683041000006112  
35 683051000006114  
36 683061000006111  
37 683071000006116  
38 1694851000000112  
39 1815691000006116  
40 1815791000006111  
41 4173251000006117  
42 4417551000006118  
43 5325991000006118  
44 7308311000006114  
45 7561511000006114  
46 7597941000006114  
47 12616771000006112  
48 474077018  
49 306971000006117  
50 4417331000006119  
51 23676016

For peer review only

1 297780010  
2 2164217010  
3 2816277010  
4 141181000006110  
5 141191000006113  
6 141201000006111  
7 141211000006114  
8 141221000006118  
9 141231000006115  
10 141241000006113  
11 413591000006113  
12 940531000006110  
13 2005411000006110  
14 2380521000000115  
15 2684701000006112  
16 3070701000006112  
17 3260101000006113  
18 3308541000006113  
19 4392811000006113  
20 4392911000006118  
21 6888471000006113  
22 6904721000006118  
23 6904731000006115  
24 6905681000006114  
25 6905701000006112  
26 6906651000006110  
27 6906661000006112  
28 7089281000006117  
29 12084841000006111  
30 12084861000006110  
31 12218521000006116  
32 12735431000006111  
33 12735441000006118  
34 260879014  
35 289874016  
36 289974015  
37 289980011  
38 312137011  
39 344818012  
40 344819016  
41 344820010  
42 457317011  
43 474077018  
44 1216346016  
45 1231541019  
46 2871720012  
47 139571000006117  
48 306971000006117  
49 313001000006116  
50 313271000006116

For peer review only

1  
2 313381000006111  
3 313391000006114  
4 315461000006113  
5 316711000006113  
6 458201000006115  
7  
8 683191000006119  
9 695561000006118  
10 880801000006116  
11 907281000006117  
12 1870401000006113  
13 2999011000006111  
14 3019771000006115  
15 3043491000006119  
16 3109051000006115  
17 3408441000006115  
18 3408461000006116  
19 3408471000006111  
20 3408501000006116  
21 4172921000006112  
22 4172951000006115  
23 4173671000006112  
24 4417331000006119  
25 5601561000006117  
26 5601571000006112  
27 5648201000006119  
28 5701111000006119  
29 5701131000006113  
30 5701141000006115  
31 5701151000006118  
32 6623111000006119  
33 6843711000006111  
34 6860401000006118  
35 6870291000006119  
36 7057421000006116  
37 7057441000006111  
38 7236901000006114  
39 7236911000006112  
40 7248451000006116  
41 8037771000006119  
42 88121017  
43 292075015  
44 344846014  
45 450987014  
46 1220821017  
47 2870704010  
48 310071000006116  
49 3358901000006111  
50 5971121000006114  
51 293925011  
52 293986010

For peer review only

1  
2 293999013  
3 294000010  
4 294004018  
5 294007013  
6 294079010  
7  
8 294082017  
9 294085015  
10 294231010  
11 294236017  
12 294583019  
13 294590012  
14 294606017  
15  
16 351107016  
17 493120017  
18 496498015  
19 499268014  
20 499346019  
21 499626019  
22  
23 508244016  
24 1216006019  
25 1216286014  
26 1216339013  
27 1216340010  
28 1216755016  
29 2535668013  
30 2816277010  
31  
32 110881000006115  
33 141181000006110  
34 141191000006113  
35 141201000006111  
36 141211000006114  
37 141221000006118  
38 141231000006115  
39 141241000006113  
40 582091000006116  
41 582791000006119  
42 711521000006117  
43 711531000006119  
44 813801000006111  
45 813821000006118  
46 813851000006110  
47 821381000006117  
48 881991000006113  
49 1815761000006115  
50 2790391000006118  
51 2992501000006112  
52 2992581000006115  
53 3260101000006113  
54 3514431000006111  
55 3620051000006119  
56  
57  
58  
59  
60

For peer review only

1  
2 3944001000006113  
3 4392811000006113  
4 4417981000006117  
5 6904731000006115  
6 6906661000006112  
7  
8 7843061000006112  
9 7869351000006117  
10 11998051000006118  
11 12735441000006118  
12  
13 201652012  
14 289875015  
15 289876019  
16 289880012  
17 289881011  
18 289884015  
19 289888017  
20 289888017  
21 289889013  
22 292005016  
23 292006015  
24 292009010  
25 292010017  
26 292028015  
27 292031019  
28 292177013  
29 414008012  
30 414151014  
31 414160018  
32 414248013  
33 509741017  
34 1216015014  
35 1216360019  
36 1216396015  
37 202801000006110  
38 306931000006115  
39 311311000006115  
40 311511000006114  
41 314521000006116  
42 555131000006118  
43 731621000006113  
44 880821000006114  
45 880831000006112  
46 880841000006119  
47 2168661000000116  
48 2168671000000111  
49 2168681000000113  
50 2233381000000115  
51 2233421000000112  
52 2233461000000116  
53 3019871000006112  
54 3020041000006112  
55  
56  
57  
58  
59  
60

For peer review only

1 3327891000006112  
2 3327901000006111  
3 3327911000006114  
4 3327921000006118  
5 3327961000006112  
6 3327971000006117  
7 3992621000006112  
8 3992631000006110  
9 4009731000006118  
10 4009741000006111  
11 4416411000006118  
12 4416551000006116  
13 4416591000006110  
14 4416681000006111  
15 4416691000006114  
16 4420051000006115  
17 4420351000006118  
18 4753241000006113  
19 5599791000006114  
20 5599801000006110  
21 5600851000006111  
22 5600941000006116  
23 5601231000006111  
24 5601261000006119  
25 5601291000006110  
26 5601361000006112  
27 5601401000006119  
28 5601461000006118  
29 6347711000006119  
30 6693111000006110  
31 7048071000006112  
32 7048121000006112  
33 7118591000006115  
34 7527551000006112  
35 7716791000006117  
36 7849031000006117  
37 7868981000006116  
38 7995641000006118  
39 8020031000006118  
40 13660051000006110  
41 13937971000006110  
42 14075341000006119  
43 289813015  
44 292170010  
45 414257019  
46 414278016  
47 451429010  
48 2901912012  
49 3517129013  
50 308801000006118

For peer review only

1  
2 309181000006110  
3 763421000006116  
4 763431000006118  
5 1815151000006116  
6 1815161000006119  
7 1815171000006114  
8 1815181000006112  
9 1815221000006115  
10 1815231000006117  
11 1815491000006119  
12 2124491000000113  
13 2124511000000117  
14 2734791000000113  
15 3150381000006111  
16 3393051000006113  
17 3395251000006115  
18 4172561000006112  
19 4172591000006116  
20 4172601000006112  
21 5602251000006111  
22 5602351000006117  
23 5602371000006110  
24 5602571000006115  
25 5975501000006113  
26 6693411000006115  
27 6940861000006118  
28 6940871000006113  
29 7353041000006113  
30 7358451000006113  
31 7361211000006114  
32 7369661000006114  
33 7566531000006112  
34 7569011000006116  
35 13686181000006118  
36 351150014  
37 492446019  
38 2759411000006117  
39 2927341000006111  
40 4392941000006119  
41 3572551000006118  
42 3572591000006112  
43 3620711000006117  
44 2759391000006117  
45 7730691000006117  
46 2933771000006112  
47 3260631000006113  
48 5063951000006115  
49 4393011000006110  
50 3375911000006118  
51 6897941000006112  
52  
53  
54  
55  
56  
57  
58  
59  
60

For peer review only



1  
2 3260621000006110  
3 3574151000006117  
4 3741651000006111  
5 3910091000006119  
6 8022691000006113  
7 2760441000006117  
8 3087921000006111  
9 3910111000006111  
10 3375961000006115  
11 3375951000006117  
12 3690391000006116  
13 3087931000006114  
14 2872741000006118  
15 4197441000006118  
16 3503691000006112  
17 6897931000006119  
18 6901291000006112  
19 5064031000006113  
20 9330921000006118  
21 3503711000006110  
22 3508741000006117  
23 3087941000006116  
24 4393031000006116  
25 7730701000006117  
26 501134015  
27 141261000006112  
28 510091000006118  
29 5064051000006118  
30 7730711000006119  
31 3625611000006116  
32 2769291000006117  
33 2760461000006118  
34 5606361000006119  
35 3741641000006114  
36 3910101000006113  
37 7730721000006110  
38 2769261000006113  
39 3505255014  
40 5063871000006119  
41 2584211000006111  
42 3572561000006116  
43 3726941000006112  
44 4392911000006118  
45 3726951000006114  
46 4392921000006114  
47 110881000006115  
48 294586010  
49 881981000006110  
50 477758018  
51 3574141000006119  
52  
53  
54  
55  
56  
57  
58  
59  
60

For peer review only

1  
2 5064041000006115  
3 2769271000006118  
4 3959891000006111  
5 9330941000006113  
6 2760431000006110  
7 3505254013  
8 4393081000006115  
9 4393061000006113  
10 3869571000006114  
11 9330911000006114  
12 3505252012  
13 5063971000006113  
14 3910121000006115  
15 4393021000006119  
16 4393051000006111  
17 3087871000006118  
18 3572571000006111  
19 2759381000006115  
20 2927331000006118  
21 2759371000006118  
22 474030011  
23 2872731000006111  
24 3910081000006117  
25 5606351000006116  
26 5063941000006117  
27 3375921000006114  
28 2933781000006110  
29 3375931000006112  
30 7769041000006118  
31 6901301000006113  
32 4393041000006114  
33 8022671000006112  
34 3620681000006118  
35 4392981000006113  
36 4392961000006115  
37 7750601000006113  
38 3087851000006111  
39 7750581000006115  
40 3959881000006113  
41 7750591000006117  
42 8022681000006110  
43 5063991000006114  
44 8022661000006117  
45 5063961000006118  
46 12735491000006110  
47 3910131000006117  
48 4392971000006110  
49 3145291000006113  
50 3572581000006114  
51 4197431000006111  
52  
53  
54  
55  
56  
57  
58  
59  
60

For peer review only

1  
2 3625601000006119  
3 5063981000006111  
4 12735511000006116  
5 399206011  
6 3869581000006112  
7 3505251017  
8 3087881000006115  
9 3690381000006119  
10 3375941000006119  
11 4393071000006118  
12 3508751000006115  
13 3620691000006115  
14 2584231000006117  
15 9330931000006115  
16 3726961000006111  
17 2759401000006115  
18 399209016  
19 500268011  
20 7750571000006118  
21 2760451000006115  
22 7769031000006111  
23 5064021000006110  
24 2927351000006113  
25 2927381000006117  
26 711521000006117  
27 711531000006119  
28 2584251000006112  
29 2584181000006112  
30 2592491000006111  
31 2584261000006114  
32 496520018  
33 2592511000006117  
34 5313751000006118  
35 2592521000006113  
36 2584221000006115  
37 2584191000006110  
38 2592541000006118  
39 2584271000006119  
40 2592531000006111  
41 2592501000006115  
42 2584201000006113  
43 5313761000006116  
44  
45  
46  
47  
48  
49  
50  
51  
52  
53  
54  
55  
56  
57  
58  
59  
60

For peer review only

|    |                                                            |
|----|------------------------------------------------------------|
| 1  |                                                            |
| 2  | Term                                                       |
| 3  | Familial amyloid polyneuropathy, Iowa type                 |
| 4  | Senile cardiac amyloidosis                                 |
| 5  | Cardiac amyloidosis                                        |
| 6  | Amyloidosis                                                |
| 7  | Amyloidosis                                                |
| 8  | AL amyloidosis                                             |
| 9  | Cerebrovascular amyloidosis                                |
| 10 | Amyloid nephropathy of Ostertag                            |
| 11 | Sporadic primary amyloidosis                               |
| 12 | Primary amyloidosis NEC                                    |
| 13 | Other specified amyloidosis                                |
| 14 | Amyloidosis NOS                                            |
| 15 | [X]Other amyloidosis                                       |
| 16 | [X]Hereditary amyloidosis, unspecified                     |
| 17 | Autonomic neuropathy due to amyloid                        |
| 18 | Polyneuropathy in amyloidosis                              |
| 19 | Pulmonary amyloidosis                                      |
| 20 | Nephrotic syndrome in amyloidosis                          |
| 21 | Organ limited non-hereditary amyloidosis                   |
| 22 | Articular amyloid                                          |
| 23 | Amyloid arthropathy                                        |
| 24 | Arthropathy in amyloidosis                                 |
| 25 | Senile systemic amyloidosis                                |
| 26 | Amyloid of bladder                                         |
| 27 | Amyloid of prostate                                        |
| 28 | Amyloid disease of the urethra                             |
| 29 | Beta-2 microglobulin amyloidosis                           |
| 30 | Familial amyloid polyneuropathy type II                    |
| 31 | Nephropathic amyloidosis                                   |
| 32 | Familial amyloid polyneuropathy type III                   |
| 33 | British type amyloid polyneuropathy                        |
| 34 | Amyloid polyneuropathy type I                              |
| 35 | Andrade type amyloid polyneuropathy                        |
| 36 | Amyloid A level                                            |
| 37 | Amyloid heart muscle disease                               |
| 38 | Familial cardiac amyloid                                   |
| 39 | Familial neuropathic amyloid                               |
| 40 | Myopathy due to amyloid                                    |
| 41 | Hereditary amyloidosis, unspecified                        |
| 42 | Radiolabelled serum amyloid P component scintigraphy       |
| 43 | Participant in ALchemy (AL amyloidosis chemotherapy) study |
| 44 | Amyloid nephropathy with deafness and urticaria            |
| 45 | Amyloid cardiomyopathy                                     |
| 46 | Amyloidosis of stomach                                     |
| 47 | Amyloid of stomach                                         |
| 48 | Amyloidosis of intestine                                   |
| 49 | Amyloid of intestine                                       |
| 50 | Amyloidosis of small intestine                             |
| 51 | Amyloid of small intestine                                 |
| 52 | Amyloidosis of large intestine                             |
| 53 |                                                            |
| 54 |                                                            |
| 55 |                                                            |
| 56 |                                                            |
| 57 |                                                            |
| 58 |                                                            |
| 59 |                                                            |
| 60 |                                                            |

1 Amyloid of large intestine  
2 Familial neuropathic amyloidosis  
3 Renal amyloidosis  
4 Familial visceral amyloidosis, Ostertag type  
5 Amyloid deposition  
6 Amyloid  
7 Systemic amyloidosis  
8 Amyloid myopathy  
9 Amyloid of testes  
10 Hereditary amyloidosis  
11 Autonomic neuropathy due to amyloidosis  
12 Accelerated rejection of renal transplant  
13 Very mild acute rejection of renal transplant  
14 Acute rejection of renal transplant  
15 Acute rejection of renal transplant - grade I  
16 Acute rejection of renal transplant - grade II  
17 Acute rejection of renal transplant - grade III  
18 Chronic rejection of renal transplant  
19 Chronic rejection of renal transplant - grade 1  
20 Chronic rejection of renal transplant - grade II  
21 Chronic rejection of renal transplant - grade III  
22 Acute-on-chronic rejection of renal transplant  
23 Excision of rejected transplanted kidney  
24 [X]Failure & rejection of other transplanted organ & tissue  
25 Excision of rejected transplanted kidney  
26 GVHD - Graft-versus-host disease  
27 End stage renal failure with renal transplant  
28 Failed renal transplant  
29 Acute rejection of liver transplant  
30 [X]Myelodysplastic syndrome, unspecified  
31 Myelodysplastic syndrome  
32 [X]Neoplasm/uncertain+unknown behavior/other myelodysplastic syndrome  
33 Myelodysplastic syndrome (clinical)  
34 Myelodysplasia  
35 Myelodysplasia of the spinal cord  
36 Myelodysplastic syndrome  
37 Myelodysplastic syndrome drugs Band 1  
38 Myelodysplastic/myeloproliferative disease  
39 Myelodysplastic syndrome with isolated del(5q) chromosomal abnormality  
40 MDS - Myelodysplastic syndrome  
41 Myelodysplastic syndrome with 5q- syndrome  
42 Myelodysplasia of spinal cord  
43 Acute myeloid leukaemia with myelodysplasia-related changes  
44 Therapy-related myelodysplastic syndrome  
45 Childhood myelodysplastic syndrome  
46 MDS (myelodysplasia) tumour and germline WGS (whole genome sequencing)  
47 Chronic myelomonocytic leukaemia  
48 Chronic myelomonocytic leukaemia  
49 Chronic myelomonocytic leukemia  
50 Sickle cell nephropathy

1 Proliferative retinopathy due to sickle cell disease  
2 RBC's - sickle cells present  
3 History of sickle cell anaemia  
4 Sickle cell anaemia  
5 Sickle-cell anaemia NOS  
6 Sickle-cell anaemia of unspecified type  
7 Sickle cell anaemia with crisis  
8 Sickle cell anaemia with haemoglobin C disease  
9 Sickle-cell anaemia with haemoglobin D disease  
10 Sickle-cell anaemia with haemoglobin E disease  
11 [X]Other sickle-cell disorders  
12 H/O: sickle cell disease  
13 Sickle cell disease annual review  
14 Referral to sickle cell specialist nurse  
15 Sickle cell retinopathy  
16 Sickle cell-haemoglobin C disease  
17 Sickle cell anaemia with haemoglobin E disease  
18 Sickle cell  
19 Sickle cell anemia  
20 Sickle cell-beta-thalassaemia  
21 Sickle cell disease without crisis  
22 Hemoglobin S sickling disorder with crisis  
23 Sickle cell anemia crisis  
24 Sickling disorder due to haemoglobin S  
25 Sickle cell disease  
26 Sickle cell crisis  
27 Sickle cell anemia with crisis  
28 Suspected sickle cell  
29 Vaso-occlusive pain episode in sickle cell disease  
30 Vasoocclusive pain episode in sickle cell disease  
31 Sickle cell-haemoglobin SS disease  
32 NHS Sickle Cell and Thalassaemia Screening Programme result consistent with Hb SS (sickle cell-Haemoglobin S)  
33 NHS Sickle Cell and Thalassaemia Screening Programme result consistent with sickle cell anaemia  
34 Bone marrow: myeloma cells  
35 Immunoproliferative neoplasm or myeloma NOS  
36 Myelomonocytic leukaemia  
37 Subacute myelomonocytic leukaemia  
38 Osteoporosis in multiple myelomatosis  
39 Kahler's disease  
40 Myelomatosis  
41 Multiple myeloma  
42 Lambda light chain myeloma  
43 Chronic myelomonocytic leukaemia  
44 [M]Acute myelomonocytic leukaemia  
45 [M]Plasma cell myeloma  
46 Juvenile myelomonocytic leukaemia  
47 Solitary myeloma  
48 Chronic myelomonocytic leukaemia  
49 [M]Monostotic myeloma  
50 [M]Multiple myeloma

1 [M]Myeloma NOS  
2 [M]Myelomatosis  
3 [M]Plasmacytic myeloma  
4 [M]Solitary myeloma  
5 M4 - Acute myelomonocytic leukaemia  
6 Myeloma - solitary  
7 Multiple myeloma and immunoproliferative neoplasms  
8 Multiple myeloma etc.  
9 [RFC] Multiple myeloma  
10 Juvenile myelomonocytic leukaemia  
11 Acute myelomonocytic leukaemia  
12 Myeloma kidney  
13 Myelomalacia  
14 Myelomonocytic leukaemia  
15 Multiple myeloma  
16 Plasma cell myeloma  
17 Myeloma  
18 Multiple myeloma, no International Classification of Diseases for Oncology subtype  
19 Plasmacytic myeloma  
20 Myeloma  
21 AMML - Acute myelomonocytic leukaemia  
22 Chronic myelomonocytic leukemia  
23 Light chain myeloma  
24 Non-secretory myeloma  
25 Myeloma screening  
26 IgA myeloma  
27 IgG myeloma  
28 Immunoglobulin G myeloma  
29 IgD myeloma  
30 Plasma cell myeloma/plasmacytoma  
31 Smouldering myeloma  
32 Kappa light chain myeloma  
33 Plasma cell myeloma/plasmacytoma  
34 Solitary osseous myeloma  
35 Monostotic myeloma  
36 Asymptomatic multiple myeloma  
37 Asymptomatic myeloma  
38 Indolent multiple myeloma  
39 History of multiple myeloma  
40 Myelofibrosis  
41 [M]Acute myelofibrosis  
42 Acute myelofibrosis  
43 Myelosclerosis with myeloid metaplasia  
44 [M]Myelosclerosis with myeloid metaplasia  
45 Osteomyelofibrosis  
46 [M]Hodgkin's disease, lymphocytic depletion, diffuse fibrosis  
47 MF - Myelofibrosis  
48 Primary myelofibrosis  
49 Congenital folate malabsorption anaemia  
50 Haemolytic anaemia due to glutathione metabolism disorder

1 Haemolytic anaemia due to hexokinase deficiency  
2 Haemolytic anaemia due to pyruvate kinase deficiency  
3 Anaemia due to disorders of nucleotide metabolism  
4 Enzyme deficiency haemolytic anaemia NOS  
5 Other specified hereditary haemolytic anaemias  
6 Other specified hereditary haemolytic anaemia NOS  
7 Hereditary haemolytic anaemia NOS  
8 Pyridoxine-responsive sideroblastic anaemia  
9 Sideroblastic anaemia NOS  
10 [X]Other anaemias due to enzyme disorders  
11 [X]Other specified hereditary haemolytic anaemias  
12 [X]Other sideroblastic anaemias  
13 Biermer's congenital pernicious anaemia  
14 Sideroblastic anaemia  
15 Congenital dyserythropoietic anaemia  
16 Glucose-6-phosphate dehydrogenase deficiency anaemia  
17 Congenital sideroblastic anaemia  
18 Congenital anaemia  
19 Congenital hypoplastic anaemia  
20 [M] Refractory anaemia with sideroblasts  
21 Hypoplastic anaemia - familial  
22 Fanconi's hypoplastic anaemia  
23 Fanconi's familial refractory anaemia  
24 Perinatal jaundice from hereditary haemolytic anaemias  
25 Refractory anaemia with sideroblasts  
26 History of sickle cell anaemia  
27 Thalassaemia major - Cooley's anaemia  
28 Sickle cell anaemia  
29 Sickle-cell anaemia NOS  
30 Sickle-cell anaemia of unspecified type  
31 Sickle cell anaemia with crisis  
32 Sickle cell anaemia with haemoglobin C disease  
33 Sickle-cell anaemia with haemoglobin D disease  
34 Sickle-cell anaemia with haemoglobin E disease  
35 Congenital dyshaematopoietic anaemia  
36 Congenital Heinz-body anaemia  
37 Mediterranean anaemia  
38 Mediterranean anaemia  
39 Haemolytic anaemia due glutathione metabolism disorder NOS  
40 Haemolytic anaemia due to glutathione metabolism disorder OS  
41 Haemolytic anaemia due to triose phosphate isomerase deficiency  
42 Hereditary haemolytic anaemia  
43 Other hered. haem. anaemias  
44 Refractory anaemia with ringed sideroblasts  
45 Congenital Heinz body haemolytic anaemia  
46 Fanconi's anaemia  
47 Fanconi anemia  
48 Sickle cell anaemia with haemoglobin E disease  
49 G6PD deficiency anemia  
50 Congenital dyserythropoietic anaemia, type II



1 Diamond-Blackfan anaemia  
2 Sickle cell anemia  
3 Refractory anaemia with sideroblasts  
4 Sickle cell anemia crisis  
5 Sickle cell anemia with crisis  
6 Familial hypercholanemia  
7 Severe congenital hypochromic sideroblastic anemia  
8 X chromosome-linked sideroblastic anaemia  
9 NHS Sickle Cell and Thalassaemia Screening Programme result consistent with sickle cell anaemia  
10 Chronic lymphoid leukaemia  
11 Lymphatic leukaemia  
12 Lymphoid leukaemia  
13 Subacute lymphoid leukaemia  
14 Other lymphoid leukaemia  
15 Aleukaemic lymphoid leukaemia  
16 Other lymphoid leukaemia NOS  
17 Lymphoid leukaemia NOS  
18 [M]Lymphoid leukaemias  
19 Acute lymphoblastic leukaemia - category  
20 [M]Subacute lymphoid leukaemia  
21 [M]Aleukaemic lymphoid leukaemia  
22 [M]Lymphosarcoma cell leukaemia  
23 [M]Lymphosarcoma cell leukaemia NOS  
24 [X]Other lymphoid leukaemia  
25 B-cell chronic lymphocytic leukaemia  
26 T-cell prolymphocytic leukaemia  
27 B-cell acute lymphoblastic leukaemia  
28 B-cell prolymphocytic leukaemia  
29 Acute lymphoid leukaemia  
30 [M]Prolymphocytic leukaemia  
31 [V]Personal history of lymphoid leukaemia  
32 [M]Lymphoid leukaemia NOS  
33 Prolymphocytic leukaemia  
34 Chronic lymphoid leukaemia  
35 [M]Lymphatic leukaemia  
36 [M]Lymphosarcoma cell leukaemias  
37 Lymphoid leukaemia  
38 Chronic lymphoid leukaemia, disease  
39 Lymphosarcoma cell leukaemia  
40 Lymphoid leukaemia - acute  
41 Lymphoid leukaemia - chronic  
42 Lymphoid leukaemia - subacute  
43 Prolymphocytic leukemia of T-cell type  
44 Prolymphocytic leukaemia of B-cell type  
45 Chronic lymphocytic leukaemia of B-cell type  
46 Clinical stage A chronic lymphocytic leukaemia  
47 Clinical stage B chronic lymphocytic leukaemia  
48 Clinical stage C chronic lymphocytic leukaemia  
49 Lymphocytic leukemia  
50 Lymphocytic leukaemia

1  
2 Chronic lymphocytic leukaemia  
3 Chronic lymphocytic leukemia  
4 Chronic lymphoid leukemia  
5 Chronic lymphatic leukemia  
6 Chronic lymphatic leukaemia  
7  
8 Chronic lymphocytic leukaemia, B-cell type  
9 Acute lymphoid leukemia  
10 ALL - Acute lymphoblastic leukaemia  
11 CLL - Chronic lymphocytic leukaemia  
12 CLL - Chronic lymphocytic leukemia  
13 Prolymphocytic leukemia, T-cell type  
14 Acute lymphoblastic leukemia  
15 Lymphoblastic leukaemia  
16 Acute lymphocytic leukaemia  
17 Acute lymphoblastic leukaemia  
18 Prolymphocytic leukaemia  
19 Lymphoid leukaemia (category)  
20 Subacute lymphoid leukemia  
21 B-CLL - B-cell chronic lymphocytic leukemia  
22 B-CLL - B-cell chronic lymphocytic leukaemia  
23 T-cell chronic lymphocytic leukaemia  
24 Chronic lymphocytic prolymphocytic leukaemia syndrome  
25 Large granular lymphocytic leukaemia  
26 LGLL - Large granular lymphocytic leukemia  
27 B-cell acute lymphoblastic leukemia  
28 Pre B-cell acute lymphoblastic leukaemia  
29 Common acute lymphoblastic leukaemia  
30 T-cell acute lymphoblastic leukaemia  
31 Acute lymphoblastic leukaemia, transitional pre-B-cell  
32 Leukaemic infiltration of skin (T-cell lymphoblastic leukaemia)  
33 Philadelphia chromosome-positive acute lymphoblastic leukaemia  
34 Philadelphia chromosome-positive acute lymphoblastic leukemia  
35 Smouldering chronic lymphocytic leukaemia  
36 T-cell large granular lymphocytic leukaemia  
37 Philadelphia chromosome-negative precursor B-cell acute lymphoblastic leukaemia  
38 B lymphoblastic leukaemia lymphoma with t(9;22) (q34;q11.2); BCR-ABL 1  
39 Chronic lymphocytic leukaemia genetic mutation variant  
40 Acute lymphoid leukaemia relapse  
41 History of chronic lymphocytic leukaemia  
42 Monoclonal B-cell lymphocytosis chronic lymphocytic leukaemia-type  
43 B lymphoblastic leukaemia lymphoma with t(5;14)(q31;q32); IL3-IGH  
44 Precursor B-cell acute lymphoblastic leukaemia  
45 Other types of follicular non-Hodgkin's lymphoma  
46 [X]Other types of follicular non-Hodgkin's lymphoma  
47 Follicular non-Hodgkin's small cleaved cell lymphoma  
48 Follicular non-Hodgkin's large cell lymphoma  
49 Follicular non-Hodgkin's lymphoma  
50 Diffuse follicle centre lymphoma  
51 Paediatric follicular lymphoma  
52 [M]Follicular lymphosarcoma NOS

1 [M]Giant follicular lymphoma  
 2 Follicular lymphoma NOS  
 3 Follicular non-Hodgkin's mixed small cleaved and large cell lymphoma  
 4 Follicular lymphoma  
 5 Follicular lymphoma grade 1  
 6 Follicular lymphoma grade 2  
 7 Follicular lymphoma grade 3  
 8 Follicular lymphoma, cutaneous follicle centre  
 9 Other types of follicular lymphoma  
 10 Other non-follicular lymphoma  
 11 Follicular lymphoma grade 3a  
 12 Follicular lymphoma grade 3b  
 13 Cutaneous follicle centre lymphoma  
 14 Follicular lymphoma, grade 3  
 15 Follicular lymphoma, grade 2  
 16 Follicular lymphoma  
 17 Follicular non-Hodgkin's lymphoma, mixed small cleaved cell and large cell (clinical)  
 18 Follicular lymphoma grade 2  
 19 Follicular non-Hodgkin's lymphoma, large cell (clinical)  
 20 Follicular low grade B-cell lymphoma  
 21 Follicular malignant lymphoma - mixed cell type  
 22 Follicular malignant lymphoma - small cleaved cell  
 23 Follicular malignant lymphoma - large cell  
 24 Follicular non-Hodgkin lymphoma  
 25 Primary cutaneous follicular centre B-cell lymphoma  
 26 Primary cutaneous follicle centre cell lymphoma  
 27 Primary cutaneous follicle center cell lymphoma  
 28 Follicular non-Hodgkin's lymphoma of soft tissue  
 29 Follicular non-Hodgkin's lymphoma of lung  
 30 Follicular non-Hodgkin's lymphoma of skin  
 31 Follicular non-Hodgkin's lymphoma of intestine  
 32 Follicular non-Hodgkin's lymphoma diffuse follicle centre sub-type grade 1  
 33 Follicular non-Hodgkin's lymphoma diffuse follicle centre cell sub-type grade 2  
 34 Follicular non-Hodgkin's lymphoma of lymph nodes of multiple sites  
 35 Homozygous alpha thalassaemia  
 36 Thalassaemia  
 37 F thalassaemia  
 38 Homozygous beta thalassemia  
 39 Double heterozygous for Hb S and beta thalassaemia  
 40 beta Thalassaemia  
 41 Beta thalassaemia syndrome  
 42 Alpha thalassemia syndrome  
 43 Delta-beta thalassemia  
 44 Alpha thalassaemia X-linked intellectual disability syndrome  
 45 beta<sup>0</sup> Thalassaemia deletion type  
 46 Thalassemia with other hemoglobinopathy  
 47 Delta-beta-Lepore thalassemia  
 48 Sickle cell-beta<sup>0</sup>-thalassaemia  
 49 HPFH delta beta<sup>0</sup> thalassaemia  
 50 Sickle cell-thalassemia disease with crisis

1  
2 Thalassaemia with other haemoglobinopathy  
3 alpha<sup>0</sup> Thalassaemia  
4 delta beta<sup>0</sup> Thalassaemia  
5 beta<sup>0</sup> Thalassaemia  
6 Maternal thalassaemia in pregnancy  
7 delta Thalassaemia  
8 Thalassaemia-haemoglobin S disease  
9 Beta 0 thalassaemia  
10 Hereditary persistence of fetal haemoglobin delta beta<sup>0</sup> thalassaemia  
11 Hereditary persistence of fetal hemoglobin delta beta<sup>0</sup> thalassaemia  
12 epsilon gamma delta beta<sup>0</sup> Thalassaemia  
13 Sickle cell thalassaemia disease  
14 epsilon gamma delta beta Thalassaemia  
15 beta<sup>0</sup> Thalassaemia nondeletion type  
16 Thalassaemia-haemoglobin C disease  
17 Sickle cell-thalassaemia disease with crisis  
18 Sickle cell-thalassaemia disease without crisis  
19 Hemoglobin E/beta thalassaemia disease  
20 Thalassaemia in mother complicating childbirth  
21 Thalassaemia-hemoglobin C disease  
22 delta<sup>0</sup> Thalassaemia  
23 Sickle cell thalassaemia disease  
24 Sickle cell-delta beta<sup>0</sup>-thalassaemia  
25 Alpha thalassaemia X-linked intellectual disability syndrome  
26 Alpha thalassaemia syndrome  
27 Haemoglobin S/beta thalassaemia  
28 Beta thalassaemia major  
29 Double heterozygous for Hb E and beta thalassaemia  
30 Alpha thalassaemia X-linked intellectual deficit  
31 Hb Lepore thalassaemia  
32 Hereditary persistence of fetal haemoglobin thalassaemia  
33 Delta thalassaemia  
34 Alpha thalassaemia-mental retardation syndrome  
35 delta beta<sup>0</sup> Thalassaemia  
36 Beta 0 thalassaemia  
37 Alpha thalassaemia X-linked intellectual deficit  
38 Hereditary persistence of foetal haemoglobin thalassaemia  
39 Alpha thalassaemia intellectual disability syndrome deletion type  
40 Homozygous alpha thalassaemia  
41 Alpha thalassaemia major  
42 beta Thalassaemia  
43 Thalassaemia major  
44 Sickle cell-beta-thalassaemia  
45 Homozygous thalassaemia  
46 Sickle cell-beta-thalassaemia  
47 Thalassaemia major - Cooley's anaemia  
48 [X]Other thalassaemias  
49 Thalassaemias  
50 Delta-beta thalassaemia  
51 alpha<sup>0</sup> Thalassaemia

1 Double heterozygous for Hb E and beta thalassaemia  
2 Hereditary persistence of fetal hemoglobin thalassaemia  
3  $\alpha\alpha$ gamma delta beta<sup>0</sup> thalassaemia  
4 Maternal thalassaemia in childbirth  
5 delta Thalassaemia  
6 Alpha thalassaemia intellectual disability syndrome deletion type  
7 Sickle cell trait with coexistent alpha-thalassaemia  
8 Sickle cell anemia with coexistent alpha-thalassaemia  
9 Thalassaemia syndrome  
10 Thalassaemia in mother complicating childbirth  
11 Alpha-thalassaemia intellectual disability syndrome linked to chromosome 16  
12 Alpha-beta thalassaemia  
13 Beta zero thalassaemia  
14 Sickle cell-beta<sup>0</sup>-thalassaemia  
15 Sickle cell anaemia with coexistent alpha-thalassaemia  
16 Thalassaemia-hemoglobin S disease  
17 Beta thalassaemia  
18 delta beta Thalassaemia  
19 Homozygous beta thalassaemia  
20 delta beta Thalassaemia  
21 Thalassaemia with haemoglobin S disease  
22 epsilon gamma delta beta Thalassaemia  
23 beta<sup>0</sup> Thalassaemia  
24 Alpha thalassaemia-mental retardation syndrome  
25 Delta-beta-Lepore thalassaemia  
26 HPFH delta beta<sup>0</sup> thalassaemia  
27 beta<sup>0</sup> Thalassaemia deletion type  
28 Hereditary persistence of fetal hemoglobin (HPFH) delta beta<sup>0</sup> thalassaemia  
29 Beta thalassaemia X-linked thrombocytopenia syndrome  
30 Sickle cell-thalassaemia disease without crisis  
31 Sickle cell-delta beta<sup>0</sup>-thalassaemia  
32 Maternal thalassaemia in pregnancy  
33 alpha Thalassaemia  
34 Thalassaemia with hemoglobin S disease  
35 Double heterozygous for Hb S and beta thalassaemia  
36 Inclusion body beta-thalassaemia  
37 Sickle cell-thalassaemia disease  
38 Dominant beta-thalassaemia  
39  $\alpha\alpha$ gamma delta beta<sup>0</sup> thalassaemia  
40 Inclusion body beta-thalassaemia  
41 Thalassaemia in mother complicating pregnancy  
42 Gamma thalassaemia  
43 Thalassaemia in mother complicating pregnancy  
44 Alpha-beta thalassaemia  
45 NHS Sickle Cell and Thalassaemia Screening Programme result consistent with sickle cell beta-thalassaemia  
46 Beta zero thalassaemia  
47 Hemoglobin S/beta thalassaemia  
48 Thalassaemia  
49 Beta thalassaemia syndrome  
50 beta<sup>0</sup> Thalassaemia nondeletion type

1 Hb Lepore thalassaemia  
2 Gamma thalassaemia  
3 NHS Sickle Cell and Thalassaemia Screening Programme result consistent with Hb (haemoglobin) variant and/c  
4 Thalassaemia major  
5 Thalassaemia syndrome  
6 Alpha-thalassaemia intellectual disability syndrome linked to chromosome 16  
7 Sickle cell-thalassaemia disease  
8 epsilon gamma delta beta<sup>0</sup> Thalassaemia  
9 Hereditary persistence of foetal haemoglobin (HPFH) delta beta<sup>0</sup> thalassaemia  
10 Sickle cell trait with coexistent alpha-thalassaemia  
11 delta<sup>0</sup> Thalassaemia  
12 alpha Thalassaemia  
13 Alpha thalassaemia major  
14 Maternal thalassaemia in childbirth  
15 Homozygous thalassaemia  
16 F thalassaemia  
17 Thalassaemia NOS  
18 Beta thalassaemia  
19 Dominant beta-thalassaemia  
20 Delta thalassaemia  
21 Beta thalassaemia X-linked thrombocytopenia syndrome  
22 Haemoglobin E/beta thalassaemia disease  
23 Cooley's anemia  
24 Cooley's anaemia  
25 Mediterranean anaemia  
26 Mediterranean anaemia  
27 Haemoglobin Barts hydrops  
28 Haemoglobin Bart's hydrops syndrome  
29 Haemoglobin Bart  
30 Haemoglobin Bart hydrops syndrome  
31 Haemoglobin Bart's disease  
32 Haemoglobin Barts  
33 Haemoglobin Barts identification  
34 Hb - Haemoglobin Barts  
35 Hemoglobin Barts hydrops  
36 Hemoglobin Bart's hydrops syndrome  
37 Hb - Hemoglobin Barts  
38 Hemoglobin Bart hydrops syndrome  
39 Hemoglobin Barts  
40 Hemoglobin Bart  
41 Hemoglobin Bart's disease  
42 Hemoglobin Barts identification  
43  
44  
45  
46  
47  
48  
49  
50  
51  
52  
53  
54  
55  
56  
57  
58  
59  
60

1  
2  
3  
4  
5  
6  
7  
8  
9  
10  
11  
12  
13  
14  
15  
16  
17  
18  
19  
20  
21  
22  
23  
24  
25  
26  
27  
28  
29  
30  
31  
32  
33  
34  
35  
36  
37  
38  
39  
40  
41  
42  
43  
44  
45  
46  
47  
48  
49  
50  
51  
52  
53  
54  
55  
56  
57  
58  
59  
60

For peer review only

1  
2  
3  
4  
5  
6  
7  
8  
9  
10  
11  
12  
13  
14  
15  
16  
17  
18  
19  
20  
21  
22  
23  
24  
25  
26  
27  
28  
29  
30  
31  
32  
33  
34  
35  
36  
37  
38  
39  
40  
41  
42  
43  
44  
45  
46  
47  
48  
49  
50  
51  
52  
53  
54  
55  
56  
57  
58  
59  
60

For peer review only



1  
2  
3  
4  
5  
6  
7  
8  
9  
10  
11  
12  
13  
14  
15  
16  
17  
18  
19  
20  
21  
22  
23  
24  
25  
26  
27  
28  
29  
30  
31  
32  
33  
34  
35  
36  
37  
38  
39  
40  
41  
42  
43  
44  
45  
46  
47  
48  
49  
50  
51  
52  
53  
54  
55  
56  
57  
58  
59  
60

For peer review only

1  
2  
3  
4  
5  
6  
7  
8  
9  
10  
11  
12  
13  
14  
15  
16  
17  
18  
19  
20  
21  
22  
23  
24  
25  
26  
27  
28  
29  
30  
31  
32  
33  
34  
35  
36  
37  
38  
39  
40  
41  
42  
43  
44  
45  
46  
47  
48  
49  
50  
51  
52  
53  
54  
55  
56  
57  
58  
59  
60

For peer review only

1  
2  
3  
4  
5  
6  
7  
8  
9  
10  
11  
12  
13  
14  
15  
16  
17  
18  
19  
20  
21  
22  
23  
24  
25  
26  
27  
28  
29  
30  
31  
32  
33  
34  
35  
36  
37  
38  
39  
40  
41  
42  
43  
44  
45  
46  
47  
48  
49  
50  
51  
52  
53  
54  
55  
56  
57  
58  
59  
60

For peer review only

1  
2  
3  
4  
5  
6  
7  
8  
9  
10  
11  
12  
13  
14  
15  
16  
17  
18  
19  
20  
21  
22  
23  
24  
25  
26  
27  
28  
29  
30  
31  
32  
33  
34  
35  
36  
37  
38  
39  
40  
41  
42  
43  
44  
45  
46  
47  
48  
49  
50  
51  
52  
53  
54  
55  
56  
57  
58  
59  
60

For peer review only

1  
2  
3  
4  
5  
6  
7  
8  
9  
10  
11  
12  
13  
14  
15  
16  
17  
18  
19  
20  
21  
22  
23  
24  
25  
26  
27  
28  
29  
30  
31  
32  
33  
34  
35  
36  
37  
38  
39  
40  
41  
42  
43  
44  
45  
46  
47  
48  
49  
50  
51  
52  
53  
54  
55  
56  
57  
58  
59  
60

For peer review only

1  
2  
3  
4  
5  
6  
7  
8  
9  
10  
11  
12  
13  
14  
15  
16  
17  
18  
19  
20  
21  
22  
23  
24  
25  
26  
27  
28  
29  
30  
31  
32  
33  
34  
35  
36  
37  
38  
39  
40  
41  
42  
43  
44  
45  
46  
47  
48  
49  
50  
51  
52  
53  
54  
55  
56  
57  
58  
59  
60

For peer review only

1  
2  
3  
4  
5  
6  
7  
8  
9  
10  
11  
12  
13  
14  
15  
16  
17  
18  
19  
20  
21  
22  
23  
24  
25  
26  
27  
28  
29  
30  
31  
32  
33  
34  
35  
36  
37  
38  
39  
40  
41  
42  
43  
44  
45  
46  
47  
48  
49  
50  
51  
52  
53  
54  
55  
56  
57  
58  
59  
60

For peer review only

1  
2  
3  
4  
5  
6  
7  
8  
9  
10  
11  
12  
13  
14  
15  
16  
17  
18  
19  
20  
21  
22  
23  
24  
25  
26  
27  
28  
29  
30  
31  
32  
33  
34  
35  
36  
37  
38  
39  
40  
41  
42  
43  
44  
45  
46  
47  
48  
49  
50  
51  
52  
53  
54  
55  
56  
57  
58  
59  
60

For peer review only



1  
2  
3  
4  
5  
6  
7  
8  
9  
10  
11  
12  
13  
14  
15  
16  
17  
18  
19  
20  
21  
22  
23  
24  
25  
26  
27  
28  
29  
30  
31  
32  
33  
34  
35  
36  
37  
38  
39  
40  
41  
42  
43  
44  
45  
46  
47  
48  
49  
50  
51  
52  
53  
54  
55  
56  
57  
58  
59  
60

emia

For peer review only

| 1  | ICD-10 code | Term                                                                      |
|----|-------------|---------------------------------------------------------------------------|
| 2  |             |                                                                           |
| 3  | E85.0       | Non-neuropathic heredofamilial amyloidosis                                |
| 4  | E85.1       | Neuropathic heredofamilial amyloidosis                                    |
| 5  | E85.2       | Heredofamilial amyloidosis, unspecified                                   |
| 6  |             |                                                                           |
| 7  | E85.4       | Organ-limited amyloidosis                                                 |
| 8  | E85.8       | Other amyloidosis                                                         |
| 9  | E85.9       | Amyloidosis, unspecified                                                  |
| 10 | D89.81      | Graft-versus-host disease                                                 |
| 11 | D89.810     | Acute graft-versus-host disease                                           |
| 12 |             |                                                                           |
| 13 | D89.811     | Chronic graft-versus-host disease                                         |
| 14 | D89.812     | Acute on chronic graft-versus-host disease                                |
| 15 | D89.813     | Graft-versus-host disease, unspecified                                    |
| 16 | D46         | Myelodysplastic Syndromes                                                 |
| 17 | D46.6       | Myelodysplastic syndrome with isolated del(5q) chromosomal abnormality    |
| 18 |             |                                                                           |
| 19 | D46.7       | Other myelodysplastic syndromes                                           |
| 20 | D46.9       | Myelodysplastic syndrome, unspecified                                     |
| 21 | C93.1       | Chronic Myelomonocytic Leukaemia                                          |
| 22 | C93.10      | Chronic myelomonocytic leukemia not having achieved remission             |
| 23 | C93.11      | Chronic myelomonocytic leukemia, in remission                             |
| 24 |             |                                                                           |
| 25 | C93.12      | Chronic myelomonocytic leukemia, in relapse                               |
| 26 | D57         | Sickle-Cell Disorders                                                     |
| 27 | D57.0       | Sickle-cell anaemia with crisis                                           |
| 28 | D57.1       | Sickle-cell anaemia without crisis                                        |
| 29 | D57.2       | Double heterozygous sickling disorders                                    |
| 30 |             |                                                                           |
| 31 | D57.8       | Other sickle-cell disorders                                               |
| 32 | C90         | Multiple myeloma and malignant plasma cell neoplasms                      |
| 33 | C90.0       | Multiple myeloma                                                          |
| 34 | D75.81      | Myelofibrosis                                                             |
| 35 | D64.0       | Hereditary sideroblastic anaemia                                          |
| 36 |             |                                                                           |
| 37 | D64.3       | Other sideroblastic anaemias                                              |
| 38 | D64.4       | Congenital dyserythropoietic anaemia                                      |
| 39 | C91.1       | Chronic lymphocytic leukaemia of B-cell type                              |
| 40 | C91.10      | Chronic lymphocytic leukemia of B-cell type not having achieved remission |
| 41 | C91.11      | Chronic lymphocytic leukemia of B-cell type in remission                  |
| 42 |             |                                                                           |
| 43 | C91.12      | Chronic lymphocytic leukemia of B-cell type in relapse                    |
| 44 | C82         | Follicular lymphoma                                                       |
| 45 | C82.0       | Follicular lymphoma grade I                                               |
| 46 | C82.1       | Follicular lymphoma grade II                                              |
| 47 | C82.2       | Follicular lymphoma grade III, unspecified                                |
| 48 | C82.3       | Follicular lymphoma grade IIIa                                            |
| 49 | C82.4       | Follicular lymphoma grade IIIb                                            |
| 50 | C82.5       | Diffuse follicle centre lymphoma                                          |
| 51 | C82.6       | Cutaneous follicle centre lymphoma                                        |
| 52 |             |                                                                           |
| 53 | C82.7       | Other types of follicular lymphoma                                        |
| 54 |             |                                                                           |
| 55 | C82.9       | Follicular lymphoma, unspecified                                          |
| 56 | D56         | Thalassaemia                                                              |
| 57 | D56.0       | Alpha thalassaemia                                                        |
| 58 | D56.1       | Beta thalassaemia                                                         |
| 59 | D56.2       | Delta-beta thalassaemia                                                   |
| 60 | D56.4       | Hereditary persistence of fetal haemoglobin [HPFH]                        |

1  
2 D56.8 Other thalassaemias  
3 D56.9 Thalassaemia, unspecified  
4 D57.2 Double heterozygous sickling disorders  
5 T86.0 Bone-marrow transplant rejection Graft-versus-host reaction or disease  
6  
7  
8  
9  
10  
11  
12  
13  
14  
15  
16  
17  
18  
19  
20  
21  
22  
23  
24  
25  
26  
27  
28  
29  
30  
31  
32  
33  
34  
35  
36  
37  
38  
39  
40  
41  
42  
43  
44  
45  
46  
47  
48  
49  
50  
51  
52  
53  
54  
55  
56  
57  
58  
59  
60

For peer review only

1  
2 Procodeid  
3 101401000006116  
4 101681000006111  
5 116189017  
6 12019901000006119  
7 12019921000006112  
8 12019931000006110  
9 120401000006119  
10 1231220012  
11 12452201000006118  
12 12452211000006115  
13 12458831000006112  
14 12477161000006113  
15 12482201000006111  
16 12482541000006110  
17 12483091000006117  
18 12489381000006119  
19 12716091000006116  
20 12716541000006118  
21 12716551000006116  
22 12719911000006119  
23 12762331000006115  
24 140251000006119  
25 140261000006117  
26 1488598017  
27 1488599013  
28 1488606017  
29 1488620012  
30 1488636014  
31 1488637017  
32 1488773015  
33 1488774014  
34 1488795016  
35 1490935011  
36 1545611000006118  
37 1545961000006110  
38 1551691000000115  
39 1554871000006110  
40 1554881000006113  
41 1554891000006111  
42 1554901000006110  
43 1554911000006113  
44 1554921000006117  
45 1554931000006119  
46 1554941000006112  
47 1554951000006114  
48 1554961000006111  
49 1554971000006116  
50 1554981000006118  
51 1554991000006115

For peer review only

1  
2 1555001000006110  
3 1555011000006113  
4 1555021000006117  
5 1555041000006112  
6 1555061000006111  
7 1555071000006116  
8 1555081000006118  
9 1555091000006113  
10 1555701000006113  
11 1555711000006111  
12 1555721000006115  
13 1555731000006117  
14 1556631000006116  
15 1703251000006111  
16 1703271000006118  
17 1703281000006115  
18 1703291000006117  
19 1703501000006114  
20 1703511000006112  
21 1778767018  
22 1779731000006118  
23 1786803010  
24 1805911000006118  
25 1822101000006117  
26 189731000006115  
27 190041000006116  
28 190051000006119  
29 190061000006117  
30 190071000006112  
31 190081000006110  
32 190091000006113  
33 190101000006119  
34 190111000006116  
35 190501000006114  
36 190511000006112  
37 1906351000006116  
38 1906641000006111  
39 1906671000006115  
40 1906681000006117  
41 190831000006115  
42 190841000006113  
43 190851000006110  
44 190861000006112  
45 190871000006117  
46 190881000006119  
47 190891000006116  
48 190901000006117  
49 190911000006119  
50 190921000006110  
51 190931000006113

For peer review only

1  
2 190941000006115  
3 190951000006118  
4 190961000006116  
5 190991000006112  
6 191001000006113  
7 191011000006111  
8 191021000006115  
9 191031000006117  
10 191041000006110  
11 191051000006112  
12 191061000006114  
13 191071000006119  
14 191091000006118  
15 191101000006112  
16 191111000006110  
17 191171000006118  
18 191181000006115  
19 191251000006115  
20 191261000006118  
21 191301000006110  
22 214161000006113  
23 214171000006118  
24 214181000006115  
25 214191000006117  
26 214201000006119  
27 214211000006116  
28 214221000006112  
29 214241000006117  
30 214251000006115  
31 214261000006118  
32 214271000006113  
33 214281000006111  
34 2156761000000117  
35 2189111000000116  
36 2310961000000118  
37 2310981000000110  
38 261675013  
39 261676014  
40 261677017  
41 261679019  
42 261694015  
43 261695019  
44 261696018  
45 261697010  
46 261700014  
47 262450015  
48 262753019  
49 262757018  
50 262760013  
51 262762017

For peer review only

1  
2 262763010  
3 262764016  
4 262765015  
5 262766019  
6 262768018  
7 262771014  
8 262772019  
9 262776016  
10 262777013  
11 262778015  
12 262779011  
13 262780014  
14 262781013  
15 262792014  
16 262794010  
17 262795011  
18 262797015  
19 262799017  
20 262805011  
21 262806012  
22 262816016  
23 262819011  
24 262820017  
25 262860016  
26 262869015  
27 262871015  
28 262881016  
29 262883018  
30 262895018  
31 262896017  
32 266092016  
33 266297018  
34 266761014  
35 2674520012  
36 2675453010  
37 2675983014  
38 2676221013  
39 2676228019  
40 2676252014  
41 2693115017  
42 273442015  
43 273825017  
44 275550012  
45 279146017  
46 2826771000006112  
47 283540016  
48 284199015  
49 294201016  
50 294202011  
51 29938100000111  
52  
53  
54  
55  
56  
57  
58  
59  
60

For peer review only

1  
2 3034301000006118  
3 3034341000006116  
4 3119241000006112  
5 3119251000006114  
6 3238841000006110  
7  
8 324069016  
9 329146019  
10 335976013  
11 3366721000006110  
12 342844011  
13 347303012  
14 372501000000116  
15 372521000000113  
16 372601000000117  
17 373141000000116  
18 373681000000115  
19 373701000000118  
20 380141000000118  
21 380261000000112  
22 380782018  
23 381921000000119  
24 381941000000114  
25 381961000000110  
26 381981000000118  
27 382001000000118  
28 382021000000110  
29 382041000000115  
30 382061000000119  
31 382081000000111  
32 385761000000110  
33 385801000000117  
34 385821000000114  
35 387331000000112  
36 387371000000114  
37 387451000000112  
38 387871000000117  
39 387891000000118  
40 394636013  
41 394637016  
42 394638014  
43 397167015  
44 399239014  
45 399240011  
46 399241010  
47 399401000000115  
48 406009010  
49 406010017  
50 406048010  
51 4152971000006111  
52 4218171000006116  
53  
54  
55  
56  
57  
58  
59  
60

For peer review only



1  
2 42541000006112  
3 453168018  
4 460119017  
5 460934012  
6 460935013  
7 460942013  
8 461426018  
9  
10 4614481000006117  
11 4614501000006110  
12 4614521000006117  
13 4614561000006111  
14 4614571000006116  
15 4614581000006118  
16 4614591000006115  
17 4614601000006111  
18 4614611000006114  
19 4614621000006118  
20 4614631000006115  
21 4614641000006113  
22 4621461000006115  
23 4621471000006110  
24 4621481000006113  
25 4621491000006111  
26 4621511000006117  
27 4621521000006113  
28 4621541000006118  
29 4621551000006116  
30 4621621000006112  
31 4621791000006119  
32 4621801000006118  
33 4621821000006111  
34 4621831000006114  
35 4621871000006112  
36 4621891000006113  
37 4621901000006112  
38 4621911000006110  
39 4621921000006119  
40 4621931000006116  
41 4621941000006114  
42 4621971000006118  
43 4621981000006115  
44 4622001000006115  
45 4622011000006117  
46 4622021000006113  
47 4622051000006116  
48 4622061000006119  
49 4622071000006114  
50 4622081000006112  
51 4622091000006110  
52 4622101000006116

For peer review only

1  
2 4622111000006118  
3 4622121000006114  
4 4622131000006112  
5 4622141000006119  
6 4622151000006117  
7 4622161000006115  
8 4622171000006110  
9 4622181000006113  
10 4622191000006111  
11 4622211000006112  
12 4622221000006116  
13 4622231000006118  
14 4622241000006111  
15 4622251000006113  
16 4622271000006115  
17 4622281000006117  
18 4622291000006119  
19 4622301000006118  
20 4622311000006115  
21 4622321000006111  
22 4622331000006114  
23 4622351000006119  
24 4622361000006117  
25 4622411000006113  
26 4622421000006117  
27 4622431000006119  
28 4622441000006112  
29 4622451000006114  
30 4622461000006111  
31 4622471000006116  
32 4622491000006115  
33 4622511000006114  
34 4622521000006118  
35 4622531000006115  
36 4622541000006113  
37 4622551000006110  
38 4622561000006112  
39 4622571000006117  
40 4622581000006119  
41 4622601000006112  
42 4645851000006119  
43 4648921000006112  
44 4649041000006111  
45 4681021000006111  
46 4723571000006118  
47 473401000006110  
48 473411000006113  
49 473431000006119  
50 473441000006112  
51 473451000006114

For peer review only

1  
2 473461000006111  
3 473471000006116  
4 473481000006118  
5 4761861000006117  
6 4761871000006112  
7 4761891000006113  
8 4761901000006112  
9 490611000000119  
10 4908911000006112  
11 490957014  
12 491111000000116  
13 494336018  
14 4983201000006114  
15 499301000000117  
16 501450016  
17 5027101000006117  
18 5027111000006119  
19 5081621000006116  
20 511991000000117  
21 520431000006117  
22 520651000006114  
23 5501071000006114  
24 5501081000006112  
25 5523011000006114  
26 55721000006115  
27 574211000006119  
28 574371000006119  
29 586281000006110  
30 6296861000006114  
31 6427181000006118  
32 6427191000006115  
33 6427201000006117  
34 6427211000006119  
35 6427231000006113  
36 6427241000006115  
37 6427251000006118  
38 6548701000006116  
39 6548781000006113  
40 657671000006110  
41 657681000006113  
42 657691000006111  
43 657701000006111  
44 658081000006115  
45 658421000006110  
46 6616241000006114  
47 6620751000006112  
48 6620761000006114  
49 6620771000006119  
50 6620791000006118  
51 6620801000006117

For peer review only

1  
2 7357461000006114  
3 7357471000006119  
4 7357481000006116  
5 743561000006118  
6 745331000000110  
7 746271000000114  
8 746511000006113  
9 747711000000111  
10 747731000000115  
11 747811000000118  
12 747831000000114  
13 747851000000119  
14 747871000000111  
15 747901000000111  
16 747921000000119  
17 747941000000114  
18 747961000000110  
19 747981000000118  
20 748001000000113  
21 748661000000116  
22 748681000000113  
23 748701000000110  
24 748721000000118  
25 748741000000113  
26 748761000000114  
27 748781000000117  
28 749001000000117  
29 749511000000113  
30 767591000006111  
31 767601000006115  
32 768011000006114  
33 770011000006117  
34 770021000006113  
35 770521000006118  
36 770531000006115  
37 770541000006113  
38 771081000006118  
39 787881000006114  
40 798261000006118  
41 8072991000006115  
42 815021000006112  
43 819341000006117  
44 878841000006110  
45 900891000006117  
46 907311000006115  
47 9851141000033117  
48 475141000033116  
49 548141000033117  
50 920741000033111  
51 391341000033118

For peer review only

1  
2 1430841000033118  
3 395141000033118  
4 8614041000033119  
5 8614141000033115  
6 256041000033110  
7  
8 586541000033115  
9 750241000033113  
10 255941000033117  
11 255241000033114  
12  
13 1608041000033116  
14 9850841000033118  
15 392041000033113  
16 256141000033114  
17 255141000033119  
18 391641000033114  
19 391741000033117  
20 391141000033116  
21 391541000033113  
22 391941000033119  
23 885441000033112  
24 474941000033115  
25 196141000033116  
26 1891841000033112  
27 395341000033115  
28 255741000033115  
29 391241000033111  
30 4907641000033116  
31 1891941000033116  
32 8963541000033110  
33 8963341000033115  
34 8963641000033111  
35 8963041000033117  
36 8962941000033110  
37 8963241000033113  
38 8963141000033118  
39 8963441000033114  
40 12198241000033110  
41 12198341000033117  
42 4259741000033112  
43 4259841000033119  
44 4157141000033115  
45 4157241000033110  
46 11695941000033111  
47 11696041000033118  
48 8193041000033117  
49 8193241000033113  
50 8193341000033115  
51 8193141000033118  
52 4954641000033115  
53 4954741000033112

For peer review only

1  
2 3269141000033118  
3 3268841000033118  
4 3268941000033114  
5 3269041000033117  
6 2717041000033110  
7 2717141000033114  
8 3138941000033115  
9 3139041000033112  
10 8581041000033111  
11 8581241000033115  
12 8581341000033113  
13 8581141000033110  
14 8197241000033116  
15 3083841000033118  
16 3012541000033111  
17 947341000033112  
18 3083741000033111  
19 9851041000033116  
20 11800041000033110  
21 9850741000033111  
22 11807741000033112  
23 11800141000033114  
24 11799941000033116  
25 11800241000033119  
26 11807641000033115  
27 2271141000033116  
28 9158341000033117  
29 2270941000033113  
30 2270841000033117  
31 2271041000033115  
32 196041000033115  
33 6138541000033119  
34 196941000033119  
35 1035541000033115  
36 196841000033110  
37 10955641000033118  
38 10955741000033110  
39 12037141000033115  
40 3059241000033110  
41 3059341000033117  
42 148541000033118  
43 7860141000033114  
44 7860241000033119  
45 10642541000033111  
46 10642441000033110  
47 3152841000033114  
48 3152741000033116  
49 825641000033117  
50 825741000033114  
51 248341000033110

For peer review only

1  
2 248441000033116  
3 3097441000033111  
4 3872441000033118  
5 3872641000033116  
6 3872941000033111  
7 3872541000033117  
8 12398041000033110  
9 274741000033119  
10 822741000033117  
11 4156641000033110  
12 4156541000033114  
13 12398141000033114  
14 3952941000033115  
15 3952841000033111  
16 10974641000033119  
17 10974541000033115  
18 386541000033117  
19 535541000033117  
20 8200041000033113  
21 8199841000033110  
22 8199941000033119  
23 8200141000033112  
24 523041000033113  
25 395241000033113  
26 10217041000033110  
27 4156041000033116  
28 4156141000033117  
29 390241000033116  
30 390341000033114  
31 390141000033111  
32 2090341000033111  
33 3057441000033119  
34 3898641000033113  
35 12195941000033113  
36 3057341000033113  
37 12195841000033117  
38 2090241000033118  
39 3898541000033112  
40 2090041000033114  
41 2090141000033113  
42 8947641000033114  
43 8947541000033113  
44 8947741000033117  
45 8947441000033112  
46 10388241000033111  
47 485641000033118  
48 10388341000033118  
49 421941000033118  
50 423841000033110  
51 4040741000033110

For peer review only

1  
2 3857341000033112  
3 333041000033113  
4 11693941000033112  
5 11694241000033118  
6 11694041000033114  
7 11694141000033113  
8 3994241000033113  
9 3994341000033115  
10 3994541000033110  
11 3994641000033111  
12 3994441000033114  
13 3994741000033119  
14 404741000033113  
15 404541000033117  
16 404641000033116  
17 8196341000033112  
18 8196241000033119  
19 4156941000033115  
20 4212641000033116  
21 4212741000033113  
22 4157041000033119  
23 9293441000033110  
24 474341000033119  
25 474441000033113  
26 6117341000033119  
27 1405941000033112  
28 10267341000033111  
29 9293541000033111  
30 6058941000033117  
31 10267541000033116  
32 5844941000033112  
33 5845241000033116  
34 6067041000033112  
35 6117141000033117  
36 1406041000033119  
37 6067141000033111  
38 6117241000033112  
39 10267441000033117  
40 5845041000033112  
41 5845141000033111  
42 4955741000033113  
43 4292641000033117  
44 4452841000033111  
45 4374741000033117  
46 2590141000033110  
47 4452741000033118  
48 2590041000033111  
49 5845441000033115  
50 2590241000033115  
51 3964641000033114

For peer review only



1  
2 2589941000033118  
3 8838441000033117  
4 4374841000033110  
5 2038241000033112  
6 2212841000033110  
7  
8 7877941000033115  
9 7877841000033111  
10 11667741000033115  
11 11667641000033112  
12  
13 11667541000033111  
14 11667441000033110  
15 2746241000033110  
16 3997641000033116  
17 1073541000033119  
18 2746341000033117  
19  
20 531841000033117  
21 531741000033110  
22 529241000033119  
23 529041000033110  
24 1073641000033118  
25 1077441000033114  
26 1073741000033110  
27 1077341000033115  
28  
29 529341000033112  
30 6167441000033114  
31 6167541000033110  
32 3347941000033110  
33 3348041000033113  
34 3348241000033117  
35 3348141000033112  
36  
37 540541000033112  
38 540641000033113  
39 2642041000033114  
40 547341000033118  
41 2642141000033113  
42 3983641000033110  
43 1506441000033117  
44 1506341000033111  
45 3983741000033118  
46 547541000033113  
47 4061141000033114  
48 4453741000033111  
49 1607941000033119  
50 12188941000033117  
51 6470841000033117  
52 12189441000033117  
53 12188741000033115  
54 5292841000033112  
55 12189541000033116  
56 10334741000033117  
57  
58  
59  
60

For peer review only

1  
2 10334441000033112  
3 12189241000033118  
4 10334841000033110  
5 5292741000033119  
6 6471741000033117  
7  
8 10334241000033111  
9 5292541000033110  
10 10334641000033114  
11 12189141000033113  
12 9118141000033112  
13 5292641000033111  
14 8233141000033111  
15 6471241000033111  
16 10334541000033113  
17 4374441000033112  
18 4374341000033118  
19 2258141000033111  
20 2258241000033116  
21 586441000033116  
22 579141000033110  
23 2799741000033116  
24 587041000033110  
25 2799841000033114  
26 2799641000033113  
27 2799541000033112  
28 587541000033117  
29 587141000033114  
30 5264741000033112  
31 5264641000033115  
32 11757341000033115  
33 630441000033119  
34 5976141000033112  
35 11665641000033118  
36 630641000033117  
37 11757541000033110  
38 11757441000033114  
39 11665541000033119  
40 5886241000033115  
41 630541000033118  
42 11757741000033119  
43 630341000033113  
44 11665441000033115  
45 11757641000033111  
46 7860541000033117  
47 7860641000033116  
48 3092941000033116  
49 728841000033110  
50 10013741000033113  
51 10012941000033117  
52 749941000033114

For peer review only

1 749841000033118  
2 1548941000033115  
3 1547741000033117  
4 1547941000033119  
5 749441000033116  
6 1547841000033110  
7 749341000033110  
8 1548841000033111  
9 749241000033117  
10 9703941000033112  
11 914141000033114  
12 750041000033117  
13 914041000033110  
14 750141000033118  
15 3050641000033118  
16 3050541000033119  
17 3177241000033114  
18 3177341000033116  
19 6428241000033115  
20 6428341000033113  
21 5355141000033111  
22 12185841000033116  
23 194941000033112  
24 4519141000033112  
25 775041000033114  
26 12185941000033112  
27 4519241000033117  
28 775141000033113  
29 194841000033116  
30 12330541000033110  
31 12330141000033118  
32 12330241000033113  
33 12330441000033114  
34 12330341000033115  
35 12330041000033117  
36 4522841000033118  
37 4522941000033114  
38 4188241000033115  
39 4187841000033117  
40 8839241000033114  
41 10494841000033114  
42 4187541000033119  
43 4188141000033110  
44 8839141000033119  
45 10494541000033112  
46 4187641000033118  
47 10494741000033116  
48 4187741000033110  
49 4188041000033111  
50 4187941000033113

For peer review only

1  
2 10494641000033113  
3 10488241000033116  
4 11781741000033116  
5 11781841000033114  
6 10488341000033114  
7 10488541000033119  
8 10488441000033115  
9  
10 841641000033116  
11 841741000033113  
12 903741000033112  
13 38541000033110  
14 38641000033111  
15 901641000033116  
16 2012141000033113  
17 2012241000033118  
18 899041000033116  
19 899141000033117  
20 1495241000033117  
21 4202841000033118  
22 4957041000033116  
23 1495141000033112  
24 4202941000033114  
25 913741000033110  
26 913841000033117  
27 913941000033113  
28 914441000033118  
29 2617241000033110  
30 915041000033111  
31 914941000033111  
32 2659941000033117  
33 3922341000033115  
34 3922241000033113  
35 2157041000033111  
36 3097241000033110  
37 3097341000033117  
38 2157141000033110  
39 3097141000033115  
40 2156941000033110  
41 11492541000033114  
42 11492141000033117  
43 4269341000033118  
44 4269441000033112  
45 4507541000033111  
46 4507641000033112  
47 10213141000033116  
48 10213241000033111  
49 10212841000033117  
50 10213041000033115  
51 10492141000033113  
52 10491841000033111

For peer review only

1  
2 10491941000033115  
3 10491741000033118  
4 10371941000033118  
5 10371741000033116  
6 12352841000033112  
7 12352741000033119  
8 12043541000033115  
9 12042941000033115  
10 11580041000033110  
11 11579841000033115  
12 11579741000033113  
13 11579941000033111  
14 4011441000033117  
15 1892041000033110  
16 3870741000033112  
17 4024741000033117  
18 3870641000033115  
19 3870841000033119  
20 4024841000033110  
21 4595041000033114  
22 1892141000033114  
23 4011541000033116  
24 3870941000033110  
25 1753741000033111  
26 1029541000033115  
27 3952141000033117  
28 1404241000033119  
29 3201541000033110  
30 3201641000033111  
31 1747941000033115  
32 7680641000033112  
33 4907741000033113  
34 11822741000033116  
35 11822841000033114  
36 11822941000033118  
37 11822541000033112  
38 11823041000033111  
39 11822641000033113  
40 3859041000033118  
41 3859141000033119  
42 4429441000033119  
43 4429341000033113  
44 4806041000033116  
45 4806141000033117  
46 11275641000033114  
47 11275841000033110  
48 11275541000033113  
49 11275741000033117  
50 11275341000033118  
51 11275441000033112

For peer review only

1  
2 5833241000033118  
3 5832241000033113  
4 5832141000033118  
5 5832941000033116  
6 12292141000033119  
7 12292241000033114  
8 10599341000033111  
9 10599441000033117  
10 3217241000033119  
11 4806241000033112  
12 4806341000033119  
13 3217141000033114  
14 969841000033115  
15 1052641000033112  
16 8273941000033111  
17 8886841000033113  
18 8887041000033116  
19 8887141000033117  
20 8886941000033117  
21 3270341000033118  
22 2645141000033119  
23 2645241000033114  
24 3270241000033111  
25 1112241000033113  
26 1446641000033117  
27 1152341000033114  
28 10209441000033113  
29 10209641000033110  
30 10209741000033118  
31 10209541000033114  
32 1154241000033113  
33 8840041000033112  
34 8839941000033117  
35 8123841000033116  
36 8123941000033112  
37 8123641000033117  
38 8123541000033118  
39 8124041000033114  
40 8123741000033114  
41 3944041000033114  
42 3943941000033112  
43 3949941000033114  
44 3949841000033118  
45 3949741000033111  
46 3950241000033113  
47 3950041000033117  
48 3950141000033118  
49 11420041000033110  
50 11420141000033114  
51 11419541000033118

For peer review only

1  
2 11419841000033116  
3 2995041000033111  
4 2994941000033111  
5 5886641000033117  
6 1904741000033110  
7 1904841000033117  
8 4326541000033119  
9 1904541000033119  
10 4326341000033114  
11 4326241000033116  
12 5886441000033119  
13 5886741000033114  
14 5886941000033112  
15 1904941000033113  
16 1905141000033112  
17 5886541000033118  
18 4326441000033115  
19 5886841000033116  
20 1905041000033113  
21 1904441000033115  
22 1904641000033118  
23 4803041000033114  
24 4803241000033118  
25 6455241000033110  
26 6455441000033111  
27 6455141000033115  
28 1430541000033115  
29 6455341000033117  
30 3102541000033119  
31 818041000033111  
32 11717441000033116  
33 11717541000033115  
34 11717741000033111  
35 11717641000033119  
36 9158941000033118  
37 1446841000033116  
38 6466841000033110  
39 4608241000033117  
40 4608141000033112  
41 4608441000033116  
42 2280341000033117  
43 9159041000033110  
44 2280241000033110  
45 734641000033116  
46 8614541000033112  
47 4608341000033110  
48 10740541000033118  
49 10740241000033115  
50 10740441000033119  
51 10740341000033113

For peer review only

1  
2 2188541000033112  
3 2188441000033111  
4 9075041000033117  
5 9076141000033113  
6 9074941000033117  
7 9076041000033114  
8 1460341000033118  
9 1455041000033117  
10 2076541000033113  
11 1506241000033118  
12 1454941000033117  
13 7739541000033119  
14 7739741000033110  
15 7739841000033117  
16 7739641000033118  
17 6529941000033113  
18 6530041000033117  
19 11940041000033110  
20 11940241000033119  
21 11939841000033111  
22 11939941000033115  
23 11940141000033114  
24 11940341000033112  
25 1508741000033113  
26 3997441000033118  
27 3982941000033114  
28 3997541000033117  
29 1005441000033112  
30 1519641000033110  
31 504241000033114  
32 1518641000033118  
33 1518541000033119  
34 9104141000033115  
35 3347541000033116  
36 3347441000033117  
37 951841000033112  
38 3347741000033112  
39 9104041000033119  
40 3347641000033115  
41 951741000033119  
42 8560941000033116  
43 8561041000033114  
44 8561041000033114  
45  
46  
47  
48  
49  
50  
51  
52  
53  
54  
55  
56  
57  
58  
59  
60

For peer review only



1 Term  
2 thyroid gland ablat - irradiat  
3 thyroid tumour/metast irradiat  
4 chemotherapy  
5 selective internal radiotherapy of liver using yttrium (90-y) labelled microspheres  
6 sirt (selective internal radiotherapy) of liver using yttrium (90-y) labeled microspheres  
7 sirt (selective internal radiotherapy) of liver using yttrium (90-y) labelled microspheres  
8 superfic.x-ray therapy 10-60kv  
9 radiotherapy procedures  
10 radioth.: temporary implant  
11 radium needles  
12 [v]maintenance chemotherapy  
13 [x]other chemotherapy  
14 admit radiotherapy emergency  
15 afterload radioth.- op cavity  
16 brachytherapy  
17 post-operartive chemotherapy  
18 superficial or orthovoltage treatment for radiotherapy  
19 progress of radiotherapy  
20 radiotherapy progress nos  
21 radiotherapy as the cause of abnormal reaction of patient, or of later complication, without mention of misad  
22 selective internal radiotherapy of liver using yttrium (90-y) labeled microspheres  
23 short dis.+contact radiotherap  
24 short dist/contact radioth nos  
25 pre-operative chemotherapy  
26 post-operartive chemotherapy  
27 high dose brachytherapy  
28 iodine seed radiotherapy  
29 combined pre-operative chemotherapy and radiotherapy  
30 combined post-operative chemotherapy and radiotherapy  
31 selectron therapy  
32 iridium wire therapy  
33 stereotactic radiotherapy  
34 brachytherapy  
35 selective internal radiotherapy microspheres lesion of liver  
36 percutaneous brachytherapy of lesion of bile duct  
37 cancer chemotherapy management plan  
38 procurement drugs for chemotherapy for neoplasm in bands 1-5  
39 procurement drugs chemotherapy neoplasm regimens in band 1  
40 procurement drugs chemotherapy neoplasm regimens in band 2  
41 procurement drugs chemotherapy neoplasm regimens in band 3  
42 procurement drugs chemotherapy neoplasm regimens in band 4  
43 procurement drugs chemotherapy neoplasm regimens in band 5  
44 os procurement drugs chemotherapy for neoplasm in bands 1-5  
45 procurement drugs chemotherapy for neoplasm in bands 1-5 nos  
46 procurement of drugs chemotherapy for neoplasm in bands 6-10  
47 procurement drugs chemotherapy neoplasm regimens in band 6  
48 procurement drugs chemotherapy neoplasm regimens in band 7  
49 procurement drugs chemotherapy neoplasm regimens in band 8  
50 procurement drugs chemotherapy neoplasm regimens in band 9

1 procurement drugs chemotherapy neoplasm regimens in band 10  
2 os procurement drugs chemotherapy for neoplasm in bands 6-10  
3 procurement drugs chemotherapy for neoplasm bands 6-10 nos  
4 del comp chemo neo inc prolong infusion treat first attend  
5 deliv complex parenteral chemotherapy neopl first attendance  
6 deliver simple parenteral chemother neoplas first attendance  
7 delivery subsequent element cycle chemotherapy for neoplasm  
8 vol def radioth imag intensity-modul radia ther (imrt) dosim  
9 volume definition radiotherapy imaging, dosimetry tech supp  
10 volume definit multiple phases complex radiotherapy dosimetr  
11 volume definition simple radiotherapy imaging and dosimetry  
12 volume definit simple radiotherap imaging simple calculation  
13 intro radioactive substance org interstit brachytherapy noc  
14 preparation for total body irradiation  
15 preparation for simp radiotherapy with imaging and dosimetry  
16 prep for simple radioth with imaging and simple calculation  
17 prepar for superficial radiotherapy with simple calculation  
18 intro radioactive substance into organ for brachytherapy noc  
19 intro non-remov radioact subst into organ for brachyther noc  
20 radionuclide therapy  
21 neoadjuvant chemotherapy  
22 radiotherapy - internal  
23 electrochemotherapy  
24 radical radiotherapy  
25 radiation therapy  
26 radio-chem.: into cavity  
27 radio-chem.:for immunosuppres.  
28 radio-chem.:local artery  
29 radio-chemo.: i-v route  
30 radio-chemo.: oral route  
31 radio-chemo.: to stop spread  
32 radio-chemo:local infiltration  
33 radio-chemotherapy nos  
34 radiological post-op. control  
35 radiological pre-op. control  
36 brachytherapy  
37 other chemotherapy drugs  
38 other specified other chemotherapy drugs  
39 unspecified other chemotherapy drugs  
40 radioth. for haemopo. irradiat  
41 radioth. for lymphat.irradiat.  
42 radioth.: infiltrate tissue  
43 radioth.: infuse - head/neck  
44 radioth.: infuse - skull/brain  
45 radioth.: infuse organ cavity  
46 radioth.: permanent seeds nos  
47 radioth.: seeds into brain  
48 radioth.: seeds into cavity  
49 radioth.: temp. abdom. implant  
50 radioth.: temp. brain implant

1 radioth.: temp. limb implant  
2 radioth.: temp. pelvic implant  
3 radioth.: temp. thorax implant  
4 radioth.:infuse-periton cavity  
5 radioth.:infuse-pleural cavity  
6 radioth.:temporary implant nos  
7 radioth.for immunosuppression  
8 radioth:endolymphatic infusion  
9 radioth:infuse-urinary bladder  
10 radioth:seeds into hypophysis  
11 radioth:temp.head/neck implant  
12 radioth:temp.lymphatic implant  
13 radiotherapy - post-op.control  
14 radiotherapy - pre-op. control  
15 radiotherapy -intra-op.control  
16 radiotherapy nec  
17 radiotherapy procedure with complication, without blame  
18 radiotherapy to lesion of conjunctiva  
19 radiotherapy to lesion of cornea  
20 radiotherapy-tumour palliation  
21 preload cavity radioth. nos  
22 preload cavity radioth.-sealed  
23 preload radioth-female genital  
24 preload radioth-urinary system  
25 preload radioth.- ear  
26 preload radioth.- mouth  
27 preload radioth.- nose  
28 preload radioth.- orbit  
29 preload radioth.- rectum  
30 preload radioth.- resp.organs  
31 preload radioth.- upper git  
32 preload radioth.-paranas sinus  
33 neoadjuvant chemotherapy  
34 electrochemotherapy  
35 high dose rate brachytherapy  
36 pulsed dose rate brachytherapy  
37 radiological tumour control  
38 x-ray metastasis control  
39 x-ray radiotherapy control  
40 purpose of radiotherapy  
41 radiotherapy purpose - nos  
42 progress of radiotherapy  
43 radiotherapy started  
44 radiotherapy changed  
45 radiotherapy progress nos  
46 image: field control:radiother  
47 x-ray beam therapy  
48 deep x-ray therapy 150-400 kv  
49 deep x-ray therapy  
50 short distance x-ray therapy

1 intracavitary x-ray therapy  
2 combined x-ray therapy  
3 x-ray beam therapy nos  
4 high-energy beam therapy  
5 betatron photon therapy  
6 high-energy beam therapy nos  
7 fast-electron therapy  
8 betatron electron therapy  
9 positron therapy  
10 combined fast-electron therapy  
11 fast-electron therapy nos  
12 proton therapy  
13 deuteron therapy  
14 distant gamma therapy nos  
15 radium contact therapy  
16 beta source contact therapy  
17 mould technique gamma/beta  
18 combined radiotherapy  
19 combined radiotherapy nos  
20 external radiotherapy nos  
21 polycythaemia irradiation  
22 radioactive drug therapy  
23 combined internal radiotherapy  
24 preload radioth.- op cavity  
25 afterload radioth.- op cavity  
26 radiomimetic chemotherapy  
27 other radiotherapy misc.  
28 give radiosensitising drug  
29 other radiotherapy nos  
30 other nuclear therapy nos  
31 radiotherapy to lesion of peripheral nerve  
32 implantation of radioactive substance into pituitary gland  
33 radiotherapy to lacrimal gland  
34 percutaneous radiofrequency ablation of lesion of kidney  
35 percutaneous radiofrequency ablation of lesion of liver  
36 percutaneous radiofrequency ablation of lesion of lung  
37 endoscopic radiofrequency ablation of lesion of prostate  
38 transurethral radiofrequency needle ablation of prostate  
39 external beam radiotherapy to lesion of retina  
40 radiotherapy  
41 implantation of radioactive substance into vulva  
42 introduction of radioactive substance into uterine cavity  
43 introduction of radioactive substance into peritoneal cavity  
44 introduction of radioactive caesium into organ noc  
45 effect of radiation therapy  
46 admit radiotherapy emergency  
47 radiotherapy treatment groups  
48 radiation aplastic anaemia  
49 aplastic anaemia due to radiation  
50 chemotherapy started

1 teleradiotherapy procedure  
2 eb - external beam radiotherapy  
3 vaginal implantation of radium  
4 radium implant in vagina  
5 poisoning caused by antineoplastic antibiotic  
6 antineoplastic antibiotic poisoning nos  
7 overdose of radiation in therapy  
8 [x]overdose of radiation given during therapy  
9 radiation therapy procedure or service  
10 strontium 89 therapy  
11 radiotherapy to lesion of retina  
12 radiotherapy preparation  
13 radiotherapy volume definition  
14 radiotherapy delivery  
15 radioactive seed implantation noc  
16 radiotherapy procedures nos  
17 other specified radiotherapy procedures  
18 delivery of oral chemotherapy for neoplasm  
19 delivery of chemotherapy for neoplasm  
20 heavy particle therapy  
21 delivery of a fraction of total body irradiation (tbi)  
22 delivery of a fraction of intracavitary radiotherapy  
23 radiotherapy delivery nos  
24 preparation for total body irradiation  
25 preparation for intracavitary radiotherapy  
26 other specified radiotherapy preparation  
27 radiotherapy preparation nos  
28 radiotherapy volume definition nos  
29 other specified radiotherapy volume definition  
30 delivery of a fraction of interstitial radiotherapy  
31 other specified radiotherapy delivery  
32 preparation for interstitial radiotherapy  
33 delivery of oral chemotherapy for neoplasm nos  
34 delivery of exclusively oral chemotherapy for neoplasm  
35 delivery of chemotherapy for neoplasm nos  
36 other specified delivery of chemotherapy for neoplasm  
37 other specified delivery of oral chemotherapy for neoplasm  
38 intravenous chemotherapy  
39 intramuscular chemotherapy  
40 subcutaneous chemotherapy  
41 oral chemotherapy  
42 neutropenia due to irradiation  
43 radiation agranulocytosis  
44 agranulocytosis due to irradiation  
45 seed implantation into prostate  
46 radioth.: temporary implant  
47 radium needles  
48 other nuclear therapy  
49 rt - radiotherapy  
50 teleradiotherapy particulate radiation

1 oral cytotoxic drug therapy  
2 continuous infusion of chemotherapy  
3 ambulatory chemotherapy  
4 [v]radiotherapy session  
5 [v]maintenance chemotherapy  
6 [v]chemotherapy session for neoplasm  
7 [x]other chemotherapy  
8 radiological preoperative control  
9 radiological postoperative control  
10 radiological tumor control  
11 radiotherapy for immunosuppression  
12 radiotherapy for haemopoietic irradiation  
13 radiotherapy for hemopoietic irradiation  
14 radiotherapy for lymphatic irradiation  
15 preoperative course of radiotherapy  
16 radiotherapy - preoperative control  
17 radiotherapy - intraoperative control  
18 postoperative course of radiotherapy  
19 radiotherapy - postoperative control  
20 x-ray therapy - external  
21 xrt - radiotherapy  
22 xrt - teletherapy  
23 x-ray teletherapy  
24 superficial x-ray therapy 10-60 kv  
25 half-deep therapy 60-150 kv  
26 dxt - teletherapy  
27 dxt - deep x-ray therapy  
28 linear accelerator photon therapy  
29 combined heavy particle therapy  
30 gamma ray and intermediate distance curietherapy  
31 intermediate distance curietherapy  
32 combined teletherapy and intermediate distance curietherapy  
33 mold technique gamma/beta  
34 external beam with internal radiotherapy  
35 external beam - surgery with preoperative radiotherapy  
36 external beam - surgery with postoperative radiotherapy  
37 external beam - surgery with chemotherapy  
38 external beam with chemotherapy  
39 internal metabolic radiotherapy  
40 thyroid tumor/metastasis irradiation  
41 bone marrow suppression - irradiation  
42 polycythemia irradiation  
43 bone tumour/metastasis irradiation  
44 bone tumor/metastasis irradiation  
45 internal radiotherapy - unsealed source  
46 radiotherapy: infuse skull/brain  
47 radiotherapy: infuse head/neck  
48 radiotherapy: infuse pleural cavity  
49 radiotherapy: infuse peritoneal cavity  
50 radiotherapy: endolymphatic infusion

1 radiotherapy: infuse urinary bladder  
2 radiotherapy: infuse organ cavity  
3 radiotherapy: infiltrate tissue  
4 internal radiotherapy - permanent seeds  
5 radiotherapy: seeds into hypophysis  
6 radiotherapy: seeds into brain  
7 radiotherapy: seeds into cavity  
8 radiotherapy: temporary brain implant  
9 radiotherapy: temporary head/neck implant  
10 radiotherapy: temporary thorax implant  
11 radiotherapy: temporary abdominal implant  
12 radiotherapy: temporary pelvic implant  
13 radiotherapy: temporary limb implant  
14 radiotherapy: temporary lymphatic implant  
15 preload radiotherapy - orbit  
16 preload radiotherapy - paranasal sinus  
17 preload radiotherapy - nose  
18 preload radiotherapy - mouth  
19 preload radiotherapy - ear  
20 preload radiotherapy - upper gastrointestinal tract  
21 preload radiotherapy - respiratory organs  
22 preload radiotherapy - urinary system  
23 preload radiotherapy - rectum  
24 afterload radiotherapy - head  
25 afterload radiotherapy - upper gastrointestinal tract  
26 afterload radiotherapy - respiratory system  
27 afterload radiotherapy - female genital  
28 afterload radiotherapy - urinary  
29 afterload radiotherapy - rectum  
30 afterload radiotherapy of oropharyngeal cavity  
31 afterload radiotherapy - op cavity  
32 radiochemotherapy: local infiltration  
33 radiochemotherapy: to stop spread  
34 radiochemotherapy: oral route  
35 radiochemotherapy via intravenous route  
36 radiochemotherapy: iv route  
37 radiochemotherapy: for immunosuppression  
38 radiochemotherapy: local artery  
39 radiochemotherapy: into cavity  
40 give radiosensitizing drug  
41 intrathecal injection of chemotherapeutic agent  
42 radiotherapy of conjunctival lesion  
43 radiotherapy of corneal lesion  
44 intraperitoneal administration of radioactive substance  
45 radiotherapy emergency hospital admission  
46 afterload cavity radioth. nos  
47 afterload radioth.- head  
48 afterload radioth.- rectum  
49 afterload radioth.- upper git  
50 afterload radioth.-fem.genital

1 afterload radioth.-resp.system  
2 afterload radioth.-urinary  
3 afterloading cavity radiother.  
4 aplastic anemia due to radiation  
5 radiation aplastic anemia  
6 aplastic anaemia caused by radiation  
7 aplastic anemia caused by radiation  
8 delivery of a fraction of external beam radiotherapy nec  
9 adverse reaction caused by antineoplastic antibiotics  
10 implantation of radioactive substance into vagina  
11 oral delivery of radiotherapy for thyroid ablation  
12 antineoplastic antibiotic poisoning  
13 sr89 therapy  
14 radioactive seed implantation into prostate  
15 cancer chemotherapy  
16 destruction of lesion of retina by radiation therapy  
17 radiotherapy to retina  
18 bile duct brachytherapy  
19 delivery of a fraction of total body irradiation  
20 bone marrow suppres.-irradiat.  
21 bone tumour/metast.irradiat.  
22 neutropenia caused by irradiation  
23 agranulocytosis caused by irradiation  
24 temporary implant radiotherapy  
25 x-ray therapy -external  
26 comb.tele+int.dist.curietherap  
27 combined heavy-particle therap  
28 non-urgent radiotherapy admisn  
29 ct - chemotherapy  
30 intraluminal brachytherapy  
31 intracavitary brachytherapy  
32 plesiotherapy radiation  
33 ict - intracavitary treatment  
34 brachytherapy procedure  
35 sealed source brachytherapy  
36 contact radiation therapy procedure  
37 postoperative chemotherapy  
38 high dose rate brachytherapy  
39 ext.beam + chemotherapy  
40 ext.beam-surg.+post-op.radioth  
41 ext.beam-surgery+chemotherapy  
42 ext.beam-surgery+preop.radioth  
43 extern.beam+intern.radiotherap  
44 external radiotherapy  
45 chemotherapy cycle  
46 radioisotope teleradiotherapy  
47 internal radiotherapy  
48 ri - radioisotope therapy  
49 radioisotope therapy  
50 short distance and contact radiotherapy



1 intracavitary brachytherapy of female genital tract  
2 gynaecologic intracavitary brachytherapy  
3 gynecologic intracavitary brachytherapy  
4 linear-accelerator photon ther  
5 implantation of radioactive substance into prostate  
6 percutaneous radiofrequency ablation of lesion of bone  
7 introduction removable radioactive material to organ noc nos  
8 preparation for external beam radiotherapy  
9 preparation for complex conformal radiotherapy  
10 preparation for hemi body irradiation  
11 preparation for intensity modulated radiation therapy  
12 other specified preparation for external beam radiotherapy  
13 preparation for external beam radiotherapy nos  
14 preparation for brachytherapy  
15 preparation for brachytherapy nos  
16 other specified preparation for brachytherapy  
17 preparation for interstitial brachytherapy  
18 preparation for intracavitary brachytherapy  
19 preparation for intraluminal brachytherapy  
20 megavoltage treatment for adaptive radiotherapy  
21 megavoltage treatment for simple radiotherapy  
22 megavoltage treatment for complex radiotherapy  
23 superficial or orthovoltage treatment for radiotherapy  
24 technical support for preparation for radiotherapy  
25 support for preparation for radiotherapy  
26 support for preparation for radiotherapy nos  
27 other specified support for preparation for radiotherapy  
28 delivery of a fraction of intraluminal brachytherapy  
29 introduction removable radioactive material into organ noc  
30 introduction removable radioactive material to organ noc os  
31 intrathecal chemotherapy  
32 internal metabolic radioth.nos  
33 internal metabolic radiotherap  
34 intern. unsealed radioth. nos  
35 intern.radioth-permanent seeds  
36 intern.radioth-unsealed source  
37 intermed.distance curietherapy  
38 hypoplastic anaemia due to radiation  
39 gamma-ray+int.dist.curietherap  
40 chemotherapy delivery  
41 half deep therapy 60-150 kv  
42 heavy-particle therapy nos  
43 cytotoxic given orally  
44 overdose -radiation in therapy  
45 [rfc] chemotherapy or radiotherapy  
46 Cometriq 20mg capsules and Cometriq 80mg capsules (Ipsen Ltd)  
47 Doxorubicin Hydrochloride Injection 50 mg  
48 Etoposide Injection 20 mg/ml  
49 Mitobronitol Tablets 125 mg  
50 Cytarabine Injection 500 mg vial

1 Thiotepe(With Sodium Chloride And Bicarbonate) Injection 15mg vial  
2 Cyclophosphamide Tablets 10 mg  
3 Docetaxel Solution For Infusion And Diluent 20 mg/2 ml vial  
4 Docetaxel Solution For Infusion And Diluent 80 mg/8 ml vial  
5 Cisplatin Injection 450 mg/vial  
6 Fludarabine Phosphate Injection 50 mg/vial  
7 Ifosfamide Injection 500 mg vial  
8 Cisplatin Injection 150 mg/vial  
9 Cisplatin Injection 500 micrograms/ml  
10 Etoposide Phosphate Injection 100 mg/vial  
11 Cabozantinib 20mg capsules and Cabozantinib 80mg capsules  
12 Cyclophosphamide Injection 1.07 g/vial  
13 Cisplatin Injection 1 mg/ml  
14 Cisplatin Injection 10 mg/vial  
15 Cyclophosphamide Injection 214 mg/vial  
16 Cyclophosphamide Injection 535 mg/vial  
17 Cytarabine Injection 100 mg/ml  
18 Cyclophosphamide Injection 107 mg/vial  
19 Cyclophosphamide Injection  
20 Melphalan Injection 100 mg vial  
21 Doxorubicin Hydrochloride Injection 10 mg  
22 Carmustine Injection 100 mg vial  
23 Oxaliplatin Powder For Solution For Injection 50 mg/vial  
24 Cyclophosphamide 50 Tablets 50 mg  
25 Cisplatin Injection 50 mg/vial  
26 Cytarabine Injection 20 mg/ml  
27 Paclitaxel Powder For Suspension For Infusion 100 mg vial  
28 Oxaliplatin Powder For Solution For Injection 100 mg/vial  
29 Giotrif 40mg tablets (Boehringer Ingelheim Ltd)  
30 Giotrif 20mg tablets (Boehringer Ingelheim Ltd)  
31 Giotrif 50mg tablets (Boehringer Ingelheim Ltd)  
32 Afatinib 30mg tablets  
33 Afatinib 20mg tablets  
34 Afatinib 50mg tablets  
35 Afatinib 40mg tablets  
36 Giotrif 30mg tablets (Boehringer Ingelheim Ltd)  
37 Alectinib 150mg capsules  
38 Alecensa 150mg capsules (Roche Products Ltd)  
39 Amsacrine 75mg/1.5ml solution for infusion ampoules and diluent  
40 Amsidine 75mg/1.5ml solution for infusion ampoules and diluent (Eurocept International bv)  
41 Arsenic 10mg/10ml solution for infusion ampoules  
42 Trisenox 10mg/10ml concentrate for solution for infusion ampoules (Teva UK Ltd)  
43 Asparaginase 10,000unit powder for solution for infusion vials  
44 Spectrila 10,000unit powder for concentrate for solution for infusion vials (medac UK)  
45 Axitinib 1mg tablets  
46 Inlyta 1mg tablets (Pfizer Ltd)  
47 Inlyta 5mg tablets (Pfizer Ltd)  
48 Axitinib 5mg tablets  
49 Azacitidine 100mg powder for suspension for injection vials  
50 Vidaza 100mg powder for suspension for injection vials (Celgene Ltd)

1 Avastin 400mg/16ml solution for infusion vials (Roche Products Ltd)  
2 Bevacizumab 100mg/4ml solution for infusion vials  
3 Bevacizumab 400mg/16ml solution for infusion vials  
4 Avastin 100mg/4ml solution for infusion vials (Roche Products Ltd)  
5 Bexarotene 75mg capsules  
6 Targretin 75mg capsules (Eisai Ltd)  
7 Bortezomib 3.5mg powder for solution for injection vials  
8 Velcade 3.5mg powder for solution for injection vials (Janssen-Cilag Ltd)  
9 Bosutinib 100mg tablets  
10 Bosulif 500mg tablets (Pfizer Ltd)  
11 Bosulif 100mg tablets (Pfizer Ltd)  
12 Bosutinib 500mg tablets  
13 Adcetris 50mg powder for concentrate for solution for infusion vials (Takeda UK Ltd)  
14 Busulfan 60mg/10ml solution for infusion ampoules  
15 Busilvex 60mg/10ml concentrate for solution for infusion ampoules (Pierre Fabre Ltd)  
16 Myleran 2mg tablets (Aspen Pharma Trading Ltd)  
17 Busulfan 2mg tablets  
18 Cometriq 20mg capsules (Ipsen Ltd)  
19 Cabozantinib 40mg tablets  
20 Cabozantinib 20mg capsules  
21 Cabometyx 60mg tablets (Ipsen Ltd)  
22 Cabometyx 20mg tablets (Ipsen Ltd)  
23 Cabozantinib 20mg tablets  
24 Cabometyx 40mg tablets (Ipsen Ltd)  
25 Cabozantinib 60mg tablets  
26 Xeloda 500mg tablets (Roche Products Ltd)  
27 Capecitabine 300mg tablets  
28 Capecitabine 500mg tablets  
29 Capecitabine 150mg tablets  
30 Xeloda 150mg tablets (Roche Products Ltd)  
31 Carboplatin 150mg/15ml solution for infusion vials  
32 Carboplatin 600mg/60ml solution for infusion vials  
33 Carboplatin 50mg/5ml solution for infusion vials  
34 Paraplatin 50mg/5ml solution for infusion vials (Bristol-Myers Squibb Pharmaceuticals Ltd)  
35 Carboplatin 450mg/45ml solution for infusion vials  
36 Carfilzomib 60mg powder for solution for infusion vials  
37 Kyprolis 60mg powder for solution for infusion vials (Amgen Ltd)  
38 Carmustine 100mg powder and solvent for solution for injection vials  
39 Carmustine 7.7mg implant  
40 Gliadel 7.7mg implant (Eisai Ltd)  
41 BiCNU 100mg powder and solvent for solution for infusion vials (Bristol-Myers Squibb Pharmaceuticals Ltd)  
42 Catumaxomab 10micrograms/0.1ml solution for infusion pre-filled syringes  
43 Catumaxomab 50micrograms/0.5ml solution for infusion pre-filled syringes  
44 Zykadia 150mg capsules (Novartis Pharmaceuticals UK Ltd)  
45 Ceritinib 150mg capsules  
46 Erbitux 100mg/50ml solution for infusion vials (Merck Serono Ltd)  
47 Cetuximab 100mg/50ml solution for infusion vials  
48 Leukeran 2mg tablets (Aspen Pharma Trading Ltd)  
49 Leukeran 5mg tablets (GlaxoSmithKline UK Ltd)  
50 Chlorambucil 2mg tablets

- 1 Chlorambucil 5mg tablets
- 2 Chloromethine 10mg solution for injection vials
- 3 Cisplatin 50mg powder for solution for infusion vials
- 4 Cisplatin 100mg/100ml solution for infusion vials
- 5 Cisplatin 10mg/10ml solution for infusion vials
- 6 Cisplatin 50mg/50ml solution for infusion vials
- 7 Cladribine 10mg tablets
- 8 Cladribine 10mg/10ml solution for infusion vials
- 9 Leustat 10mg/10ml solution for infusion vials (Janssen-Cilag Ltd)
- 10 Litak 10mg/5ml solution for injection vials (Lipomed GmbH)
- 11 Cladribine 10mg/5ml solution for injection vials
- 12 Mavenclad 10mg tablets (Merck Serono Ltd)
- 13 Evoltra 20mg/20ml concentrate for solution for infusion vials (Sanofi)
- 14 Clofarabine 20mg/20ml solution for infusion vials
- 15 Cotellic 20mg tablets (Roche Products Ltd)
- 16 Cobimetinib 20mg tablets
- 17 Crisantaspase 10,000unit powder for solution for injection vials
- 18 Erwinase 10,000unit powder for solution for injection vials (EUSA Pharma Ltd)
- 19 Xalkori 200mg capsules (Pfizer Ltd)
- 20 Crizotinib 200mg capsules
- 21 Crizotinib 250mg capsules
- 22 Xalkori 250mg capsules (Pfizer Ltd)
- 23 Endoxana 50mg tablets (Baxter Healthcare Ltd)
- 24 Cyclophosphamide 50mg tablets
- 25 Cyclophosphamide 2g powder for solution for injection vials
- 26 Endoxana 500mg powder for solution for injection vials (Baxter Healthcare Ltd)
- 27 Endoxana 1g powder for solution for injection vials (Baxter Healthcare Ltd)
- 28 Cyclophosphamide 200mg powder for solution for injection vials
- 29 Cyclophosphamide 500mg powder for solution for injection vials
- 30 Cyclophosphamide 1g powder for solution for injection vials
- 31 Cytarabine 2g/20ml solution for injection vials
- 32 DepoCyte 50mg/5ml suspension for injection vials (Napp Pharmaceuticals Ltd)
- 33 Cytarabine 500mg/5ml solution for injection vials
- 34 Cytarabine 5g/50ml solution for infusion vials
- 35 Cytarabine (liposomal) 50mg/5ml suspension for injection vials
- 36 Cytarabine 4g/40ml solution for injection vials
- 37 Cytarabine 1g/10ml solution for injection vials
- 38 Cytarabine 100mg/1ml solution for injection vials
- 39 Cytarabine 100mg/5ml solution for injection vials
- 40 Cytarabine 500mg/25ml solution for injection vials
- 41 Tafinlar 50mg capsules (Novartis Pharmaceuticals UK Ltd)
- 42 Dabrafenib 75mg capsules
- 43 Tafinlar 75mg capsules (Novartis Pharmaceuticals UK Ltd)
- 44 Dabrafenib 50mg capsules
- 45 Dacarbazine 1g powder for solution for infusion vials
- 46 DTIC-Dome 200mg powder for solution for injection vials (Bayer Plc)
- 47 Dacarbazine 500mg powder for solution for infusion vials
- 48 Dacarbazine 100mg powder for solution for injection vials
- 49 Dacarbazine 200mg powder for solution for injection vials
- 50 Dacarbazine 600mg powder for solution for infusion vials

1 Dactinomycin 500microgram powder for solution for injection vials  
2 Cosmegen Lyovac 500microgram powder for solution for injection vials (Orphan Europe (UK) Ltd)  
3 Daratumumab 100mg/5ml solution for infusion vials  
4 Darzalex 400mg/20ml concentrate for solution for infusion vials (Janssen-Cilag Ltd)  
5 Daratumumab 400mg/20ml solution for infusion vials  
6 Darzalex 100mg/5ml concentrate for solution for infusion vials (Janssen-Cilag Ltd)  
7 Dasatinib 20mg tablets  
8 Dasatinib 50mg tablets  
9 Sprycel 20mg tablets (Bristol-Myers Squibb Pharmaceuticals Ltd)  
10 Sprycel 50mg tablets (Bristol-Myers Squibb Pharmaceuticals Ltd)  
11 Dasatinib 70mg tablets  
12 Sprycel 70mg tablets (Bristol-Myers Squibb Pharmaceuticals Ltd)  
13 Daunorubicin 20mg powder for solution for infusion vials  
14 DaunoXome 50mg emulsion for infusion vials (Galen Ltd)  
15 Daunorubicin (liposomal) 50mg emulsion for infusion vials  
16 Dacogen 50mg powder for concentrate for solution for infusion vials (Janssen-Cilag Ltd)  
17 Decitabine 50mg powder for solution for infusion vials  
18 Dexrazoxane 500mg powder and solvent for solution for infusion vials  
19 Dexrazoxane 500mg powder for solution for infusion vials  
20 Cardioxane 500mg powder for solution for infusion vials (Clinigen Healthcare Ltd)  
21 Savene 500mg powder for concentrate and solvent for solution for infusion vials (Clinigen Healthcare Ltd)  
22 Docetaxel 20mg/0.72ml solution for infusion vials and diluent  
23 Docetaxel 20mg/0.5ml solution for infusion vials and diluent  
24 Docetaxel 80mg/2ml solution for infusion vials and diluent  
25 Taxceus 80mg/4ml concentrate for solution for infusion vials (medac UK)  
26 Taxotere 20mg/0.5ml solution for infusion vials and diluent (Sanofi)  
27 Docetaxel 160mg/16ml solution for infusion vials  
28 Docetaxel 80mg/2.88ml solution for infusion vials and diluent  
29 Docetaxel 140mg/7ml solution for infusion vials  
30 Docetaxel 20mg/2ml solution for infusion vials  
31 Docetaxel 20mg/1ml solution for infusion vials  
32 Taxotere 80mg/4ml concentrate for solution for infusion vials (Sanofi)  
33 Docetaxel 160mg/8ml solution for infusion vials  
34 Taxceus 140mg/7ml concentrate for solution for infusion vials (medac UK)  
35 Taxotere 80mg/2ml solution for infusion vials and diluent (Sanofi)  
36 Taxotere 160mg/8ml concentrate for solution for infusion vials (Sanofi)  
37 Taxceus 20mg/1ml concentrate for solution for infusion vials (medac UK)  
38 Docetaxel 80mg/8ml solution for infusion vials  
39 Docetaxel 80mg/4ml solution for infusion vials  
40 Taxotere 20mg/1ml concentrate for solution for infusion vials (Sanofi)  
41 Doxorubicin 200mg/100ml solution for infusion vials  
42 Doxorubicin (liposomal) 50mg powder and solvent for suspension for infusion vials  
43 Doxorubicin 50mg/25ml solution for injection Cytosafe vials (Pfizer Ltd)  
44 Doxorubicin 10mg powder for solution for injection vials  
45 Doxorubicin 10mg/5ml solution for injection vials  
46 Doxorubicin 10mg/5ml solution for injection Cytosafe vials (Pfizer Ltd)  
47 Doxorubicin Rapid Dissolution 50mg powder for solution for injection vials (Pfizer Ltd)  
48 Doxorubicin 200mg/100ml solution for injection Cytosafe vials (Pfizer Ltd)  
49 Doxorubicin 50mg/25ml solution for injection vials  
50 Myocet 50mg powder and solvent for suspension for infusion vials (Teva UK Ltd)

1 Doxorubicin Rapid Dissolution 10mg powder for solution for injection vials (Pfizer Ltd)  
2 Doxorubin 50mg powder for solution for injection vials (medac UK)  
3 Doxorubicin 50mg powder for solution for injection vials  
4 Caelyx 20mg/10ml concentrate for solution for infusion vials (Janssen-Cilag Ltd)  
5 Caelyx 50mg/25ml concentrate for solution for infusion vials (Janssen-Cilag Ltd)  
6 Doxorubicin liposomal pegylated 50mg/25ml solution for infusion vials  
7 Doxorubicin liposomal pegylated 20mg/10ml solution for infusion vials  
8 Empliciti 400mg powder for concentrate for solution for infusion vials (Bristol-Myers Squibb Pharmaceuticals L  
9 Empliciti 300mg powder for concentrate for solution for infusion vials (Bristol-Myers Squibb Pharmaceuticals L  
10 Elotuzumab 400mg powder for solution for infusion vials  
11 Elotuzumab 300mg powder for solution for infusion vials  
12 Pharmorubicin 200mg/100ml solution for infusion Cytosafe vials (Pfizer Ltd)  
13 Epirubicin 100mg/50ml solution for infusion vials  
14 Pharmorubicin Rapid Dissolution 10mg powder for solution for injection vials (Pfizer Ltd)  
15 Epirubicin 200mg/100ml solution for infusion vials  
16 Epirubicin 50mg/25ml solution for injection vials  
17 Epirubicin 10mg/5ml solution for injection vials  
18 Epirubicin 20mg powder for solution for injection vials  
19 Epirubicin 10mg powder for solution for injection vials  
20 Pharmorubicin Rapid Dissolution 20mg powder for solution for injection vials (Pfizer Ltd)  
21 Pharmorubicin 50mg/25ml solution for injection Cytosafe vials (Pfizer Ltd)  
22 Pharmorubicin Rapid Dissolution 50mg powder for solution for injection vials (Pfizer Ltd)  
23 Pharmorubicin 10mg/5ml solution for injection Cytosafe vials (Pfizer Ltd)  
24 Epirubicin 50mg powder for solution for injection vials  
25 Eribulin 880micrograms/2ml solution for injection vials  
26 Halaven 0.88mg/2ml solution for injection vials (Eisai Ltd)  
27 Erlotinib 100mg tablets  
28 Erlotinib 150mg tablets  
29 Tarceva 150mg tablets (Roche Products Ltd)  
30 Tarceva 100mg tablets (Roche Products Ltd)  
31 Estracyt 140mg capsules (Pfizer Ltd)  
32 Estramustine 140mg capsules  
33 Eposin 100mg/5ml concentrate for solution for infusion vials (medac UK)  
34 Etoposide 100mg capsules  
35 Eposin 500mg/25ml concentrate for solution for infusion vials (medac UK)  
36 Etoposide 100mg/5ml solution for infusion vials  
37 Vepesid 50mg capsules (Bristol-Myers Squibb Pharmaceuticals Ltd)  
38 Vepesid 100mg capsules (Bristol-Myers Squibb Pharmaceuticals Ltd)  
39 Etoposide 500mg/25ml solution for infusion vials  
40 Etoposide 50mg capsules  
41 Vepesid 100mg/5ml solution for infusion vials (Bristol-Myers Squibb Pharmaceuticals Ltd)  
42 Etoposide 100mg powder for solution for injection vials  
43 Etopophos 100mg powder for solution for injection vials (Bristol-Myers Squibb Pharmaceuticals Ltd)  
44 Everolimus 3mg dispersible tablets sugar free  
45 Everolimus 2.5mg tablets  
46 Votubia 3mg dispersible tablets (Novartis Pharmaceuticals UK Ltd)  
47 Everolimus 2mg dispersible tablets sugar free  
48 Afinitor 10mg tablets (Novartis Pharmaceuticals UK Ltd)  
49 Votubia 5mg dispersible tablets (Novartis Pharmaceuticals UK Ltd)  
50 Certican 0.5mg tablets (Novartis Pharmaceuticals UK Ltd)



1 Everolimus 250microgram tablets  
2  
3 Votubia 2mg dispersible tablets (Novartis Pharmaceuticals UK Ltd)  
4 Certican 0.75mg tablets (Novartis Pharmaceuticals UK Ltd)  
5 Afinitor 5mg tablets (Novartis Pharmaceuticals UK Ltd)  
6 Votubia 5mg tablets (Novartis Pharmaceuticals UK Ltd)  
7  
8 Everolimus 500microgram tablets  
9 Everolimus 5mg tablets  
10 Certican 0.25mg tablets (Novartis Pharmaceuticals UK Ltd)  
11 Everolimus 5mg dispersible tablets sugar free  
12 Afinitor 2.5mg tablets (Novartis Pharmaceuticals UK Ltd)  
13 Everolimus 10mg tablets  
14 Votubia 10mg tablets (Novartis Pharmaceuticals UK Ltd)  
15 Votubia 2.5mg tablets (Novartis Pharmaceuticals UK Ltd)  
16 Everolimus 750microgram tablets  
17 Fludarabine phosphate 50mg/2ml solution for injection vials  
18 Fludarabine phosphate 50mg powder for solution for injection vials  
19 Fludarabine phosphate 10mg tablets  
20 Fludara 10mg tablets (Sanofi)  
21 Fludara 50mg powder for solution for injection vials (Sanofi)  
22 Fluorouracil 250mg capsules  
23 Fluorouracil 2.5g/50ml solution for infusion vials  
24 Fluorouracil 2.5g/100ml solution for infusion vials  
25 Fluorouracil 5g/100ml solution for infusion vials  
26 Fluorouracil 1g/20ml solution for injection vials  
27 Fluorouracil 500mg/10ml solution for injection vials  
28 Fluorouracil 250mg/10ml solution for injection vials  
29 Fluorouracil 500mg/20ml solution for injection vials  
30 Iressa 250mg tablets (AstraZeneca UK Ltd)  
31 Gefitinib 250mg tablets  
32 Gemcitabine 1.2g/120ml infusion bags  
33 Gemzar 200mg powder for solution for infusion vials (Eli Lilly and Company Ltd)  
34 Gemcitabine 2g powder for solution for infusion vials  
35 Gemcitabine 200mg/5ml solution for infusion vials  
36 Gemcitabine 200mg powder for solution for infusion vials  
37 Gemcitabine 1.8g/180ml infusion bags  
38 Gemcitabine 1.6g/160ml infusion bags  
39 Gemcitabine 2g/50ml solution for infusion vials  
40 Gemcitabine 1.5g powder for solution for infusion vials  
41 Gemcitabine 1g powder for solution for infusion vials  
42 Gemcitabine 2.2g/220ml infusion bags  
43 Gemzar 1g powder for solution for infusion vials (Eli Lilly and Company Ltd)  
44 Gemcitabine 1g/25ml solution for infusion vials  
45 Gemcitabine 2g/200ml infusion bags  
46 Teysuno 15mg/4.35mg/11.8mg capsules (Nordic Pharma Ltd)  
47 Teysuno 20mg/5.8mg/15.8mg capsules (Nordic Pharma Ltd)  
48 Hydroxycarbamide 500mg capsules  
49 Hydrea 500mg capsules (Bristol-Myers Squibb Pharmaceuticals Ltd)  
50 Imbruvica 140mg capsules (Janssen-Cilag Ltd)  
51 Ibrutinib 140mg capsules  
52 Idarubicin 5mg powder for solution for injection vials

1  
2 Idarubicin 10mg powder for solution for injection vials  
3 Zavedos 10mg powder for solution for injection vials (Pfizer Ltd)  
4 Zavedos 10mg capsules (Pfizer Ltd)  
5 Zavedos 5mg capsules (Pfizer Ltd)  
6 Idarubicin 5mg capsules  
7 Zavedos 25mg capsules (Pfizer Ltd)  
8 Idarubicin 25mg capsules  
9 Zavedos 5mg powder for solution for injection vials (Pfizer Ltd)  
10 Idarubicin 10mg capsules  
11 Zydelig 150mg tablets (Gilead Sciences International Ltd)  
12 Mitoxana 2g powder for solution for injection vials (Baxter Healthcare Ltd)  
13 Ifosfamide 1g powder for solution for injection vials  
14 Mitoxana 1g powder for solution for injection vials (Baxter Healthcare Ltd)  
15 Ifosfamide 2g powder for solution for injection vials  
16 Glivec 400mg tablets (Novartis Pharmaceuticals UK Ltd)  
17 Imatinib 400mg tablets  
18 Imatinib 100mg tablets  
19 Glivec 100mg tablets (Novartis Pharmaceuticals UK Ltd)  
20 Yervoy 200mg/40ml concentrate for solution for infusion vials (Bristol-Myers Squibb Pharmaceuticals Ltd)  
21 Yervoy 50mg/10ml concentrate for solution for infusion vials (Bristol-Myers Squibb Pharmaceuticals Ltd)  
22 Irinotecan 500mg/25ml solution for infusion vials  
23 Irinotecan 50mg/10ml solution for infusion vials  
24 Campto 100mg/5ml concentrate for solution for infusion vials (Pfizer Ltd)  
25 Irinotecan 300mg/15ml solution for infusion vials  
26 Irinotecan 40mg/2ml solution for infusion vials  
27 Onivyde 50mg/10ml concentrate for solution for infusion vials (Baxalta UK Ltd)  
28 Campto 300mg/15ml concentrate for solution for infusion vials (Pfizer Ltd)  
29 Irinotecan 100mg/5ml solution for infusion vials  
30 Campto 40mg/2ml concentrate for solution for infusion vials (Pfizer Ltd)  
31 Ninlaro 4mg capsules (Takeda UK Ltd)  
32 Ixazomib 3mg capsules  
33 Ixazomib 4mg capsules  
34 Ninlaro 3mg capsules (Takeda UK Ltd)  
35 Ninlaro 2.3mg capsules (Takeda UK Ltd)  
36 Ixazomib 2.3mg capsules  
37 Lapatinib 250mg tablets  
38 Tyverb 250mg tablets (Novartis Pharmaceuticals UK Ltd)  
39 Revlimid 25mg capsules (Celgene Ltd)  
40 Lenalidomide 25mg capsules  
41 Revlimid 2.5mg capsules (Celgene Ltd)  
42 Revlimid 20mg capsules (Celgene Ltd)  
43 Lenalidomide 5mg capsules  
44 Revlimid 15mg capsules (Celgene Ltd)  
45 Lenalidomide 2.5mg capsules  
46 Lenalidomide 7.5mg capsules  
47 Lenalidomide 10mg capsules  
48 Lenalidomide 20mg capsules  
49 Lenalidomide 15mg capsules  
50 Revlimid 10mg capsules (Celgene Ltd)  
51 Revlimid 5mg capsules (Celgene Ltd)



1 Revlimid 7.5mg capsules (Celgene Ltd)  
2 Lenvatinib 4mg capsules  
3 Kispilyx 10mg capsules (Eisai Ltd)  
4 Kispilyx 4mg capsules (Eisai Ltd)  
5 Lenvima 4mg capsules (Eisai Ltd)  
6 Lenvima 10mg capsules (Eisai Ltd)  
7 Lenvatinib 10mg capsules  
8 Lomustine 10mg capsules  
9 Lomustine 40mg capsules  
10 Melphalan 5mg tablets  
11 Alkeran 2mg tablets (Aspen Pharma Trading Ltd)  
12 Alkeran 5mg tablets (GlaxoSmithKline UK Ltd)  
13 Melphalan 2mg tablets  
14 Melphalan 50mg powder and solvent for solution for injection vials  
15 Alkeran 50mg powder and solvent for solution for injection vials (Aspen Pharma Trading Ltd)  
16 Mesna 400mg tablets  
17 Mesna 600mg tablets  
18 Uromitexan 600mg tablets (Baxter Healthcare Ltd)  
19 Mesna 400mg/4ml solution for injection ampoules  
20 Mesna 1g/10ml solution for injection ampoules  
21 Uromitexan 400mg tablets (Baxter Healthcare Ltd)  
22 Uromitexan 400mg/4ml solution for injection ampoules (Baxter Healthcare Ltd)  
23 Mitomycin-C Kyowa 10mg powder for solution for injection vials (Kyowa Kirin Ltd)  
24 Mitomycin-C Kyowa 2mg powder for solution for injection vials (Kyowa Kirin Ltd)  
25 Mitomycin-C Kyowa 20mg powder for solution for injection vials (Kyowa Kirin Ltd)  
26 Mitomycin 10mg powder for solution for injection vials  
27 Mitomycin-C Kyowa 40mg powder for solution for injection vials (Kyowa Kirin Ltd)  
28 Mitomycin 20mg powder for solution for injection vials  
29 Mitomycin 2mg powder for solution for injection vials  
30 Mitomycin 40mg powder for solution for injection vials  
31 Lysodren 500mg tablets (HRA Pharma UK Ltd)  
32 Mitotane 500mg tablets  
33 Onkotrone 25mg/12.5ml solution for infusion vials (Baxter Healthcare Ltd)  
34 Mitoxantrone 25mg/12.5ml solution for infusion vials  
35 Mitoxantrone 30mg/15ml solution for infusion vials  
36 Onkotrone 30mg/15ml solution for infusion vials (ASTA Medica Ltd)  
37 Mitoxantrone 20mg/10ml solution for infusion vials  
38 Onkotrone 20mg/10ml solution for infusion vials (Baxter Healthcare Ltd)  
39 Portrazza 800mg/50ml concentrate for solution for infusion vials (Eli Lilly and Company Ltd)  
40 Nectinumab 800mg/50ml solution for infusion vials  
41 Nelarabine 250mg/50ml solution for infusion vials  
42 Atriance 250mg/50ml solution for infusion vials (Novartis Pharmaceuticals UK Ltd)  
43 Nilotinib 200mg capsules  
44 Tasigna 200mg capsules (Novartis Pharmaceuticals UK Ltd)  
45 Vargatef 100mg capsules (Boehringer Ingelheim Ltd)  
46 Vargatef 150mg capsules (Boehringer Ingelheim Ltd)  
47 Nintedanib 100mg capsules  
48 Nintedanib 150mg capsules  
49 Opdivo 40mg/4ml concentrate for solution for infusion vials (Bristol-Myers Squibb Pharmaceuticals Ltd)  
50 Nivolumab 40mg/4ml solution for infusion vials

1 Opdivo 100mg/10ml concentrate for solution for infusion vials (Bristol-Myers Squibb Pharmaceuticals Ltd)  
2 Nivolumab 100mg/10ml solution for infusion vials  
3 Lynparza 50mg capsules (AstraZeneca UK Ltd)  
4 Olaparib 50mg capsules  
5 Lartruvo 190mg/19ml concentrate for solution for infusion vials (Eli Lilly and Company Ltd)  
6 Olaratumab 190mg/19ml solution for infusion vials  
7 Lartruvo 500mg/50ml concentrate for solution for infusion vials (Eli Lilly and Company Ltd)  
8 Olaratumab 500mg/50ml solution for infusion vials  
9 Tagrisso 80mg tablets (AstraZeneca UK Ltd)  
10 Osimertinib 80mg tablets  
11 Osimertinib 40mg tablets  
12 Tagrisso 40mg tablets (AstraZeneca UK Ltd)  
13 Eloxatin 200mg/40ml concentrate for solution for infusion vials (Sanofi)  
14 Eloxatin 50mg powder for solution for infusion vials (Sanofi)  
15 Oxaliplatin 100mg/20ml solution for infusion vials  
16 Oxaliplatin 50mg powder for solution for infusion vials  
17 Oxaliplatin 50mg/10ml solution for infusion vials  
18 Eloxatin 50mg/10ml concentrate for solution for infusion vials (Sanofi)  
19 Oxaliplatin 100mg powder for solution for infusion vials  
20 Oxaliplatin 150mg powder for solution for infusion vials  
21 Eloxatin 100mg powder for solution for infusion vials (Sanofi)  
22 Oxaliplatin 200mg/40ml solution for infusion vials  
23 Eloxatin 100mg/20ml concentrate for solution for infusion vials (Sanofi)  
24 Taxol 100mg/16.7ml solution for infusion vials (Bristol-Myers Squibb Pharmaceuticals Ltd)  
25 Paclitaxel 30mg/5ml solution for infusion vials  
26 Paclitaxel 300mg/50ml solution for infusion vials  
27 Taxol 30mg/5ml solution for infusion vials (Bristol-Myers Squibb Pharmaceuticals Ltd)  
28 Paclitaxel 150mg/25ml solution for infusion vials  
29 Taxol 150mg/25ml solution for infusion vials (Bristol-Myers Squibb Pharmaceuticals Ltd)  
30 Paclitaxel 100mg/16.7ml solution for infusion vials  
31 Paclitaxel albumin 100mg powder for suspension for infusion vials  
32 Abraxane 100mg powder for suspension for infusion vials (Celgene Ltd)  
33 Palbociclib 125mg capsules  
34 Ibrance 75mg capsules (Pfizer Ltd)  
35 Ibrance 100mg capsules (Pfizer Ltd)  
36 Palbociclib 75mg capsules  
37 Ibrance 125mg capsules (Pfizer Ltd)  
38 Palbociclib 100mg capsules  
39 Palifermin 6.25mg powder for solution for injection vials  
40 Kepivance 6.25mg powder for solution for injection vials (Swedish Orphan Biovitrum Ltd)  
41 Vectibix 100mg/5ml concentrate for solution for infusion vials (Amgen Ltd)  
42 Panitumumab 100mg/5ml solution for infusion vials  
43 Panitumumab 400mg/20ml solution for infusion vials  
44 Vectibix 400mg/20ml concentrate for solution for infusion vials (Amgen Ltd)  
45 Farydak 10mg capsules (Novartis Pharmaceuticals UK Ltd)  
46 Farydak 20mg capsules (Novartis Pharmaceuticals UK Ltd)  
47 Panobinostat 20mg capsules  
48 Farydak 15mg capsules (Novartis Pharmaceuticals UK Ltd)  
49 Panobinostat 10mg capsules  
50 Panobinostat 15mg capsules

1  
2 Votrient 400mg tablets (Novartis Pharmaceuticals UK Ltd)  
3 Pazopanib 400mg tablets  
4 Pazopanib 200mg tablets  
5 Votrient 200mg tablets (Novartis Pharmaceuticals UK Ltd)  
6 Pegaspargase 3,750units/5ml solution for injection vials  
7  
8 Oncaspar 3,750units/5ml solution for injection vials (Imported (United States))  
9 Pembrolizumab 50mg powder for solution for infusion vials  
10 Keytruda 50mg powder for concentrate for solution for infusion vials (Merck Sharp & Dohme Ltd)  
11 Alimta 500mg powder for concentrate for solution for infusion vials (Eli Lilly and Company Ltd)  
12 Pemetrexed 100mg powder for solution for infusion vials  
13 Alimta 100mg powder for concentrate for solution for infusion vials (Eli Lilly and Company Ltd)  
14 Pemetrexed 500mg powder for solution for infusion vials  
15 Nipent 10mg powder for solution for injection vials (Hospira UK Ltd)  
16 Pentostatin 10mg powder for solution for injection vials  
17 Perjeta 420mg/14ml concentrate for solution for infusion vials (Roche Products Ltd)  
18 Ponatinib 15mg tablets  
19 Iclusig 15mg tablets (Incyte Biosciences UK Ltd)  
20 Iclusig 45mg tablets (Incyte Biosciences UK Ltd)  
21 Ponatinib 45mg tablets  
22 Porfimer sodium 75mg powder for solution for injection vials  
23 Photofrin 15mg powder for solution for injection vials (Axcen Pharma Inc)  
24 Photofrin 75mg powder for solution for injection vials (Pinnacle Biologics BV)  
25 Porfimer sodium 15mg powder for solution for injection vials  
26 Procarbazine 50mg capsules  
27 Tomudex 2mg powder for solution for infusion vials (Hospira UK Ltd)  
28 Raltitrexed 2mg powder for solution for infusion vials  
29 Ramucirumab 100mg/10ml solution for infusion vials  
30 Cyramza 100mg/10ml concentrate for solution for infusion vials (Eli Lilly and Company Ltd)  
31 Cyramza 500mg/50ml concentrate for solution for infusion vials (Eli Lilly and Company Ltd)  
32 Ramucirumab 500mg/50ml solution for infusion vials  
33 Razoxane 125mg tablets  
34 Stivarga 40mg tablets (Bayer Plc)  
35 Regorafenib 40mg tablets  
36 Jakavi 5mg tablets (Novartis Pharmaceuticals UK Ltd)  
37 Jakavi 15mg tablets (Novartis Pharmaceuticals UK Ltd)  
38 Ruxolitinib 15mg tablets  
39 Ruxolitinib 5mg tablets  
40 Jakavi 20mg tablets (Novartis Pharmaceuticals UK Ltd)  
41 Ruxolitinib 20mg tablets  
42 Nexavar 200mg tablets (Bayer Plc)  
43 Sorafenib 200mg tablets  
44 Sunitinib 50mg capsules  
45 Sunitinib 25mg capsules  
46 Sunitinib 12.5mg capsules  
47 Sutent 50mg capsules (Pfizer Ltd)  
48 Sutent 12.5mg capsules (Pfizer Ltd)  
49 Sutent 25mg capsules (Pfizer Ltd)  
50 Imlygic 1million plaque forming units/1ml solution for injection vials (Amgen Ltd)  
51 Imlygic 100million plaque forming units/1ml solution for injection vials (Amgen Ltd)  
52 Talimogene laherparepvec 1million plaque forming units/1ml solution for injection vials

1 Talimogene laherparepvec 100million plaque forming units/1ml solution for injection vials  
2 Foscan 20mg/5ml solution for injection vials (Biolitec Pharma Ltd)  
3 Temoporfin 20mg/5ml solution for injection vials  
4 Temomedac 100mg capsules (medac UK)  
5 Temozolomide 250mg capsules  
6 Temodal 5mg capsules (Merck Sharp & Dohme Ltd)  
7 Temodal 180mg capsules (Merck Sharp & Dohme Ltd)  
8 Temozolomide 20mg capsules  
9 Temozolomide 180mg capsules  
10 Temozolomide 140mg capsules  
11 Temomedac 5mg capsules (medac UK)  
12 Temomedac 140mg capsules (medac UK)  
13 Temomedac 250mg capsules (medac UK)  
14 Temodal 20mg capsules (Merck Sharp & Dohme Ltd)  
15 Temodal 250mg capsules (Merck Sharp & Dohme Ltd)  
16 Temomedac 20mg capsules (medac UK)  
17 Temodal 140mg capsules (Merck Sharp & Dohme Ltd)  
18 Temomedac 180mg capsules (medac UK)  
19 Temodal 100mg capsules (Merck Sharp & Dohme Ltd)  
20 Temozolomide 5mg capsules  
21 Temozolomide 100mg capsules  
22 Temsirolimus 30mg/1.2ml solution for infusion vials and diluent  
23 Torisel 30mg/1.2ml concentrate for solution for infusion vials and diluent (Pfizer Ltd)  
24 Thiotepa 15mg powder for solution for infusion vials  
25 Tepadina 15mg powder for concentrate for solution for infusion vials (Adienne Pharma & Biotech)  
26 Thiotepa 100mg powder for solution for infusion vials  
27 Thiotepa 15mg powder for solution for injection vials  
28 Tepadina 100mg powder for concentrate for solution for infusion vials (Adienne Pharma & Biotech)  
29 Tioguanine 40mg tablets  
30 Lanvis 40mg tablets (Aspen Pharma Trading Ltd)  
31 Trifluridine 15mg / Tipiracil 6.14mg tablets  
32 Trifluridine 20mg / Tipiracil 8.19mg tablets  
33 Lonsurf 20mg/8.19mg tablets (Servier Laboratories Ltd)  
34 Lonsurf 15mg/6.14mg tablets (Servier Laboratories Ltd)  
35 Potactasol 1mg powder for concentrate for solution for infusion vials (Actavis UK Ltd)  
36 Topotecan 4mg powder for solution for infusion vials  
37 Topotecan 4mg/4ml solution for infusion vials  
38 Topotecan 1mg capsules  
39 Topotecan 250microgram capsules  
40 Hycamtin 1mg capsules (Novartis Pharmaceuticals UK Ltd)  
41 Hycamtin 1mg powder for concentrate for solution for infusion vials (Novartis Pharmaceuticals UK Ltd)  
42 Potactasol 4mg powder for concentrate for solution for infusion vials (Actavis UK Ltd)  
43 Topotecan 1mg powder for solution for infusion vials  
44 Hycamtin 4mg powder for concentrate for solution for infusion vials (Novartis Pharmaceuticals UK Ltd)  
45 Topotecan 1mg/1ml solution for infusion vials  
46 Hycamtin 0.25mg capsules (Novartis Pharmaceuticals UK Ltd)  
47 Mekinist 2mg tablets (Novartis Pharmaceuticals UK Ltd)  
48 Trametinib 500micrograms tablets  
49 Mekinist 0.5mg tablets (Novartis Pharmaceuticals UK Ltd)  
50 Trametinib 2mg tablets

1 Herceptin 150mg powder for solution for infusion vials (Roche Products Ltd)  
2 Trastuzumab 150mg powder for solution for infusion vials  
3 Trastuzumab emtansine 160mg powder for solution for infusion vials  
4 Kadcylla 160mg powder for concentrate for solution for infusion vials (Roche Products Ltd)  
5 Trastuzumab emtansine 100mg powder for solution for infusion vials  
6 Kadcylla 100mg powder for concentrate for solution for infusion vials (Roche Products Ltd)  
7 Treosulfan 5g powder for solution for injection vials  
8 Treosulfan 250mg capsules  
9 Treosulfan 1g powder for solution for injection vials  
10 Vesanoid 10mg capsules (Intrapharm Laboratories Ltd)  
11 Tretinoin 10mg capsules  
12 Vandetanib 100mg tablets  
13 Caprelsa 300mg tablets (Genzyme Therapeutics Ltd)  
14 Caprelsa 100mg tablets (Genzyme Therapeutics Ltd)  
15 Vandetanib 300mg tablets  
16 Vemurafenib 240mg tablets  
17 Zelboraf 240mg tablets (Roche Products Ltd)  
18 Venetoclax 100mg tablets  
19 Venclyxto 50mg tablets (AbbVie Ltd)  
20 Venetoclax 10mg tablets  
21 Venetoclax 50mg tablets  
22 Venclyxto 10mg tablets (AbbVie Ltd)  
23 Venclyxto 100mg tablets (AbbVie Ltd)  
24 Velbe 10mg powder for solution for injection vials (Eli Lilly and Company Ltd)  
25 Vincristine 5mg/5ml solution for injection vials  
26 Vincristine 1mg/1ml solution for injection vials  
27 Vincristine 2mg/2ml solution for injection vials  
28 Oncovin 1mg/1ml solution for injection vials (Eli Lilly and Company Ltd)  
29 Vindesine 5mg powder for solution for injection vials  
30 Eldisine 5mg powder for solution for injection vials (Thornton & Ross Ltd)  
31 Vinorelbine 50mg/5ml solution for infusion vials  
32 Vinorelbine 10mg/1ml solution for infusion vials  
33 Navelbine 80mg capsules (Pierre Fabre Ltd)  
34 Vinorelbine 30mg capsules  
35 Vinorelbine 20mg capsules  
36 Navelbine 50mg/5ml concentrate for solution for infusion vials (Pierre Fabre Ltd)  
37 Navelbine 30mg capsules (Pierre Fabre Ltd)  
38 Vinorelbine 80mg capsules  
39 Navelbine 20mg capsules (Pierre Fabre Ltd)  
40 Navelbine 10mg/1ml concentrate for solution for infusion vials (Pierre Fabre Ltd)  
41 Vismodegib 150mg capsules  
42 Erivedge 150mg capsules (Roche Products Ltd)  
43 Erivedge 150mg capsules (Roche Products Ltd)  
44  
45  
46  
47  
48  
49  
50  
51  
52  
53  
54  
55  
56  
57  
58  
59  
60

1  
2  
3  
4  
5  
6  
7  
8  
9  
10  
11  
12  
13  
14  
15  
16  
17  
18  
19  
20  
21  
22  
23  
24  
25  
26  
27  
28  
29  
30  
31  
32  
33  
34  
35  
36  
37  
38  
39  
40  
41  
42  
43  
44  
45  
46  
47  
48  
49  
50  
51  
52  
53  
54  
55  
56  
57  
58  
59  
60

ture

For peer review only

1  
2 Medcodeid  
3 106291000006118  
4 114310015  
5 117168016  
6 118218017  
7  
8 11924551000006114  
9 11930831000006111  
10 1227722017  
11 12456601000006116  
12 12456611000006118  
13 12456631000006112  
14 12704471000006116  
15 127091000006118  
16 1549841000006116  
17 1550021000006110  
18 165061000006114  
19 1705621000000113  
20 1726511000006111  
21 176711000006111  
22 177251000006119  
23 177341000006111  
24 181021000006119  
25 1847091000006110  
26 1847111000006118  
27 1847541000006113  
28 1848741000006116  
29 1870801000006111  
30 1905531000006112  
31 191841000006118  
32 191851000006116  
33 191861000006119  
34 191881000006112  
35 191891000006110  
36 191901000006114  
37 1927751000006113  
38 1940501000006119  
39 1940511000006116  
40 1940521000006112  
41 1940531000006110  
42 1940541000006117  
43 1940551000006115  
44 1940581000006111  
45 1940611000006115  
46 1940621000006111  
47 1940631000006114  
48 1940641000006116  
49 1940651000006119  
50 1940661000006117  
51 1940671000006112  
52 215521000000116

For peer review only

1  
2 2189151000000117  
3 2191221000000118  
4 2195121000000113  
5 2195661000000114  
6 2195721000000112  
7 2197961000000113  
8 2198001000000111  
9 2198141000000110  
10 2209021000000112  
11 2209101000000119  
12 2210341000000113  
13 2210381000000117  
14 2211311000000117  
15 2211591000000116  
16 2211671000000119  
17 2234541000000115  
18 2234621000000111  
19 2237821000000118  
20 2237861000000114  
21 2237901000000119  
22 2237981000000112  
23 2238301000000119  
24 2238381000000112  
25 2238421000000115  
26 2240321000000114  
27 2240871000000116  
28 2240951000000115  
29 228101000006113  
30 228111000006111  
31 228121000006115  
32 228131000006117  
33 228211000006117  
34 228221000006113  
35 228231000006111  
36 251923016  
37 2674486017  
38 2675886019  
39 2692168016  
40 272134015  
41 272139013  
42 272140010  
43 272141014  
44 272142019  
45 272153013  
46 272320011  
47 272325018  
48 272326017  
49 272327014  
50 272389014  
51 2767154014  
52  
53  
54  
55  
56  
57  
58  
59  
60

For peer review only



1  
2 2767385013  
3 2773184015  
4 278832011  
5 278834012  
6 278835013  
7 278844014  
8 284213011  
9 2948281000006112  
10 2948291000006110  
11 2948311000006114  
12 2948321000006118  
13 2948331000006115  
14 299665018  
15 299673010  
16 303825013  
17 303826014  
18 303833014  
19 303834015  
20 303838017  
21 303839013  
22 303842019  
23 303843012  
24 303844018  
25 303845017  
26 303846016  
27 303848015  
28 303849011  
29 303853013  
30 303854019  
31 303855018  
32 303863017  
33 303894017  
34 303977015  
35 304071000000115  
36 304091000000116  
37 304111000000114  
38 305162014  
39 305192017  
40 3222381000006114  
41 3222401000006114  
42 3245841000006115  
43 3245851000006118  
44 3245861000006116  
45 3245871000006111  
46 3245881000006114  
47 3246221000006116  
48 3246231000006118  
49 3246241000006111  
50 3246251000006113  
51 3246261000006110

For peer review only

1  
2 3246271000006115  
3 3246281000006117  
4 324973015  
5 3289691000006118  
6 329115018  
7 329116017  
8 329117014  
9 329118016  
10 329118016  
11 3296351000006114  
12 3304611000006115  
13 3304621000006111  
14 3304631000006114  
15 3319141000006113  
16 3347091000006118  
17 349825015  
18 349856011  
19 349998013  
20 353974015  
21 354340015  
22 354341016  
23 354343018  
24 354352010  
25 354417015  
26 354520014  
27 354610013  
28 354612017  
29 354613010  
30 354614016  
31 354615015  
32 354616019  
33 354617011  
34 354618018  
35 354619014  
36 354621016  
37 354623018  
38 354624012  
39 354627017  
40 354628010  
41 357219012  
42 360031000000113  
43 3619221000006118  
44 3619241000006113  
45 3647021000006114  
46 3647031000006112  
47 3647051000006117  
48 3647061000006115  
49 3647071000006110  
50 3647091000006111  
51 3657891000006116  
52 366671000000118  
53  
54  
55  
56  
57  
58  
59  
60

For peer review only

1  
2 372621000000114  
3 375841000000114  
4 380061000000118  
5 380101000000116  
6 384641000006114  
7  
8 384823013  
9 386181000000111  
10 387351000000117  
11 387911000000115  
12  
13 394350012  
14 394352016  
15 394365013  
16 394639018  
17 394640016  
18 394661000006112  
19  
20 3973811000006118  
21 3973841000006119  
22 399381000000115  
23 413415016  
24 4152501000006114  
25 422992018  
26 424791000006110  
27 441151000006115  
28 441161000006118  
29 441211000006110  
30 446291000006111  
31 4542501000006119  
32 4542521000006112  
33 454255014  
34 458521000006111  
35 460644012  
36 460680012  
37 460910019  
38 460911015  
39 461420012  
40 4668951000006113  
41 4668961000006110  
42 4668971000006115  
43 4668981000006117  
44 4669011000006116  
45 4669031000006110  
46 4669051000006115  
47 4669061000006118  
48 4669451000006113  
49 4694051000006116  
50 478131000006115  
51 4788371000006112  
52 4788421000006117  
53 4788461000006111  
54 480871000006117  
55  
56  
57  
58  
59  
60

For peer review only

1  
2 4898631000006119  
3 500371000006119  
4 501594013  
5 5051121000006115  
6 5051131000006117  
7 5051151000006112  
8 5052891000006116  
9 5052901000006117  
10 5052911000006119  
11 5052921000006110  
12 5052931000006113  
13 509111010  
14 5093331000006111  
15 5093341000006118  
16 5093451000006111  
17 5093471000006118  
18 5094141000006118  
19 5095191000006114  
20 5095591000006119  
21 5096141000006114  
22 5120141000006114  
23 5120171000006118  
24 5307111000006113  
25 5486891000006118  
26 5488801000006112  
27 5488811000006110  
28 5524381000006119  
29 557811000000119  
30 557831000000110  
31 5616371000006112  
32 5686451000006112  
33 5907531000006119  
34 5907541000006112  
35 5907551000006114  
36 5907561000006111  
37 5907571000006116  
38 5907581000006118  
39 5907591000006115  
40 595541000000119  
41 595661000000119  
42 595811000000117  
43 595871000000110  
44 595931000000116  
45 595991000000115  
46 596051000000115  
47 596131000000114  
48 596191000000110  
49 596261000000111  
50 596321000000110  
51 596401000000111

For peer review only

1  
2 6002501000006116  
3 600481000006118  
4 615611000006116  
5 618391000000118  
6 618411000000118  
7 618431000000114  
8 618441000000117  
9 618451000000119  
10 618461000000116  
11 618471000000111  
12 618481000000113  
13 618491000000110  
14 618501000000116  
15 618511000000119  
16 618521000000113  
17 618541000006116  
18 637771000000113  
19 638111000000115  
20 641471000006117  
21 641491000006116  
22 663551000006118  
23 677461000006115  
24 677471000006110  
25 677481000006113  
26 677561000006119  
27 677621000006112  
28 703481000006116  
29 7068291000006112  
30 7081801000006114  
31 7091541000006113  
32 710221000006113  
33 7118431000006118  
34 7118441000006111  
35 7118451000006113  
36 713611000006110  
37 713671000006118  
38 7147781000006115  
39 7174791000006111  
40 7174851000006111  
41 7367691000006114  
42 7367701000006114  
43 7367721000006116  
44 7367731000006118  
45 7367741000006111  
46 743721000006115  
47 754061000006111  
48 754781000006116  
49 7688001000006116  
50 7688041000006119  
51 7688541000006114

For peer review only

1  
2 773041000006111  
3 789941000006117  
4 8104101000006118  
5 8104161000006117  
6 8104231000006115  
7 8104261000006112  
8 8104301000006115  
9 8104351000006116  
10 8104381000006112  
11 8104411000006110  
12 8104451000006111  
13 8104481000006115  
14 8104511000006111  
15 8104551000006112  
16 81307015  
17 8345611000006110  
18 8345731000006113  
19 8345881000006116  
20 8345901000006119  
21 8345931000006110  
22 8346001000006110  
23 8346021000006117  
24 8346041000006112  
25 8346101000006114  
26 8346121000006116  
27 8346151000006113  
28 8346171000006115  
29 8346201000006116  
30 8346221000006114  
31 84262013  
32 866731000006115  
33 866751000006110  
34 86957016  
35 877641000006113  
36 900121000006113  
37 90461000006118  
38 90471000006113  
39 906351000006116  
40 988961000006115  
41 994421000006111  
42 994431000006114  
43 994441000006116  
44 105227013  
45 304060010  
46 3125951000006110  
47 7978191000006116  
48 4353721000006111  
49 304067013  
50 65241012  
51 108231015

For peer review only

1 39884018  
2  
3 4353731000006114  
4 4789351000006110  
5 3125961000006112  
6 4355511000006111  
7 4789231000006111  
8 4789241000006118  
9 585761000006118  
10 304061014  
11 7613791000006118  
12 7005451000006113  
13 3529461000006113  
14 354330018  
15 61575019  
16 5847371000006111  
17 28322010  
18 553191000006115  
19 304004016  
20 304005015  
21 8120501000006112  
22 555371000006118  
23 555381000006115  
24 304011017  
25 8013961000006110  
26 555391000006117  
27 8117911000006114  
28 553181000006118  
29 553201000006117  
30 303906011  
31 304056012  
32 304058013  
33 303806010  
34 12717101000006112  
35 303903015  
36 303902013  
37 303876011  
38 304063012  
39 304062019  
40 736981000006111  
41 7996161000006117  
42 703451000006112  
43 704871000006119  
44 742231000006118  
45 5014791000006110  
46 715441000006113  
47 739121000006119  
48 12472421000006113  
49 8120551000006111  
50 8120561000006113  
51 394551000006114  
52  
53  
54  
55  
56  
57  
58  
59  
60

For peer review only

1  
2 712841000006115  
3 742241000006111  
4 394561000006111  
5 745481000006111  
6 304013019  
7  
8 710491000006114  
9 7724951000006114  
10 3806551000006114  
11 3466101000006111  
12 8118551000006119  
13 3466081000006115  
14 7724961000006111  
15 5093751000006115  
16 3734071000006111  
17 8118471000006113  
18 354380012  
19 3466091000006117  
20 5093771000006113  
21 458441000006117  
22 3466111000006114  
23 3734061000006116  
24 3734051000006118  
25 5093761000006118  
26 3734081000006114  
27 388811000006119  
28 189181000006115  
29 5093781000006111  
30 7724971000006116  
31 81261000006110  
32 12704531000006115  
33 3072641000006116  
34 7689691000006113  
35 2573591000006113  
36 5093801000006110  
37 189171000006118  
38 7725071000006116  
39 821741000006112  
40 8118531000006114  
41 7725081000006118  
42 430101000006111  
43 354347017  
44 7725091000006115  
45 455321000006114  
46 4788491000006115  
47 7642391000006117  
48 7762351000006113  
49 5322751000006116  
50 5322741000006118  
51 2765411000006114  
52 303948016

For peer review only



1  
2 28321015  
3 3833151000006119  
4 554481000006111  
5 35171019  
6 2832821000006115  
7 303869018  
8 303870017  
9 4788511000006114  
10 303864011  
11 303866013  
12 8035251000006111  
13 7691501000006119  
14 7691491000006110  
15 2737251000006112  
16 11777411000006113  
17 8048001000006110  
18 8035261000006113  
19 3437381000006110  
20 303883016  
21 666291000006116  
22 5095521000006116  
23 5335261000006115  
24 3489801000006110  
25 3489751000006115  
26 5094341000006115  
27 3835261000006113  
28 5094371000006111  
29 354324018  
30 5095401000006113  
31 3030001000006112  
32 354441017  
33 354544011  
34 5094391000006112  
35 3489781000006111  
36 3489791000006114  
37 305172012  
38 5094361000006116  
39 7565541000006110  
40 3489771000006113  
41 5094441000006111  
42 3865371000006116  
43 7021571000006112  
44  
45  
46  
47  
48  
49  
50  
51  
52  
53  
54  
55  
56  
57  
58  
59  
60

For peer review only

1  
2 Term  
3 thomas intravascular shunt for dialysis  
4 Lupus nephritis  
5 renal transplant  
6 peritoneal dialysis  
7  
8 end-stage renal disease  
9 infection of hemodialysis arteriovenous fistula  
10 [v]aftercare involving renal dialysis nos  
11 [v]aftercare involving extracorporeal dialysis  
12 [v]aftercare involving intermittent dialysis  
13 [v]aftercare involving renal dialysis nos  
14 end-stage renal disease  
15 steroid sensitive nephrotic syndrome  
16 allotransplantation kidney from cadaver, heart non-beating  
17 os interventions associated with transplantation of kidney  
18 rpd prog neph syn df mesangial proliferatv glomerulonephritis  
19 flushing of peritoneal dialysis catheter  
20 acute-on-chronic renal failure  
21 renal dialysis with complication, without blame  
22 renal transplant with complication, without blame  
23 renal tubulo-interstitial disordrs in transplant rejectn  
24 removal of ambulatory peritoneal dialysis catheter  
25 aneurysm of superficialised artery of dialysis av fistula  
26 aneurysm of anastomotic site of dialysis av fistula  
27 wilms' tumour + nephrotic syndrome + pseudohermaphroditism  
28 disorders associated with peritoneal dialysis  
29 infection of dialysis arteriovenous fistula  
30 excision of rejected transplanted kidney  
31 rapid prog neph syn df mesangiocapillary glomerulonephritis  
32 rapid progres neph syn df endocapillary prolifv glomnephritis  
33 rapid progres neph syn diffuse membranous glomerulonephritis  
34 rapid progres nephritic syn df crescentic glomerulonephritis  
35 rapid progres nephritic syn focal+segmental glomerulr lesion  
36 rapid progressive nephritic syndrome, dense deposit disease  
37 disorder associated with dialysis  
38 ckd with gfr category g4 & albuminuria category a1  
39 ckd with gfr category g4 & albuminuria category a2  
40 ckd with gfr category g4 & albuminuria category a3  
41 ckd with gfr category g5 & albuminuria category a1  
42 ckd with gfr category g5 & albuminuria category a2  
43 ckd with gfr category g5 & albuminuria category a3  
44 ckd with gfr category g1 & albuminuria category a3  
45 ckd with gfr category g2 & albuminuria category a3  
46 ckd with gfr category g3a & albuminuria category a1  
47 ckd with gfr category g3a & albuminuria category a2  
48 ckd with gfr category g3a & albuminuria category a3  
49 ckd with gfr category g3b & albuminuria category a1  
50 ckd with gfr category g3b & albuminuria category a2  
51 ckd with gfr category g3b & albuminuria category a3  
52 end stage renal failure

1 urological complication of renal transplant  
2 vascular complication of renal transplant  
3 ruptured aneurysm of dialysis vascular access  
4 aneurysm of dialysis arteriovenous fistula  
5 aneurysm of needle site of dialysis arteriovenous fistula  
6 rupture of artery of transplanted kidney  
7 rupture of vein of transplanted kidney  
8 stenosis of vein of transplanted kidney  
9 aneurysm of vein of transplanted kidney  
10 aneurysm of artery of transplanted kidney  
11 stenosis of dialysis vascular access  
12 thrombosis of dialysis vascular access  
13 haemodialysis first use syndrome  
14 thrombus in peritoneal dialysis catheter  
15 anaphylactoid reaction due to haemodialysis  
16 thrombosis of artery of transplanted kidney  
17 thrombosis of vein of transplanted kidney  
18 occlusion of dialysis vascular access  
19 infection of dialysis vascular access  
20 haemorrhage of dialysis vascular access  
21 stenosis of dialysis arteriovenous graft  
22 thrombosis of dialysis arteriovenous fistula  
23 occlusion of dialysis arteriovenous graft  
24 occlusion of dialysis arteriovenous fistula  
25 infection of dialysis arteriovenous graft  
26 haemorrhage of dialysis arteriovenous fistula  
27 rupture of dialysis arteriovenous graft  
28 placement ambulatory apparatus compensation renal failure  
29 placement ambulatory apparatus- compensate renal failure nos  
30 placement ambulatory apparatus- compensate renal failure os  
31 placement ambulatory dialysis apparatus - compens renal fail  
32 placement other apparatus for compensation for renal failure  
33 placement other apparatus- compensate for renal failure nos  
34 placement other apparatus- compensate for renal failure os  
35 h/o: kidney recipient  
36 extracorporeal albumin haemodialysis  
37 creation of graft fistula for dialysis  
38 automated peritoneal dialysis  
39 insertion of arteriovenous prosthesis  
40 attention to arteriovenous shunt  
41 removal of infected arteriovenous shunt  
42 other specified arteriovenous shunt  
43 arteriovenous shunt nos  
44 ligation of acquired arteriovenous fistula  
45 allotransplantation of kidney from live donor  
46 cadaveric renal transplant  
47 other specified transplantation of kidney  
48 transplantation of kidney nos  
49 exploration of renal transplant  
50 chronic kidney disease stage 5

1  
2 chronic kidney disease stage 4  
3 chronic kidney disease stage 3  
4 haemodialysis nec  
5 other specified compensation for renal failure  
6 compensation for renal failure nos  
7 insertion of temporary peritoneal dialysis catheter  
8 renal transplant planned  
9 arteriovenous fistulisation  
10 arteriovenous fistulization  
11 creation of surgical arteriovenous fistula  
12 construction of arteriovenous fistula  
13 av - creation of arteriovenous fistula  
14 hypertensive renal disease with renal failure  
15 hypertensive heart and renal disease with renal failure  
16 nephrotic syndrome with proliferative glomerulonephritis  
17 nephrotic syndrome with membranous glomerulonephritis  
18 nephrotic syndrome, focal and segmental glomerular lesions  
19 nephrotic syndrome, diffuse membranous glomerulonephritis  
20 nephrotic syndrome, dense deposit disease  
21 nephrotic syndrome, diffuse crescentic glomerulonephritis  
22 congenital finnish nephrosis  
23 congenital nephrotic syndrome nos  
24 nephrotic syndrome in diseases ec  
25 nephrotic syndrome in amyloidosis  
26 nephrotic syndrome in diabetes mellitus  
27 nephrotic syndrome in malaria  
28 nephrotic syndrome in polyarteritis nodosa  
29 nephrotic syndrome in diseases ec nos  
30 nephrotic syndrome with other pathological kidney lesions  
31 nephrotic syndrome nos  
32 chronic rapidly progressive glomerulonephritis  
33 rapidly progressive nephritis unspecified  
34 rapidly progressive nephritic syndrome  
35 chronic kidney disease stage 3  
36 chronic kidney disease stage 4  
37 chronic kidney disease stage 5  
38 [x]rapidly progressive nephritic syndrome, other  
39 [x]other chronic renal failure  
40 idiopathic nephrotic syndrome  
41 light negative glomerulonephritis  
42 end stage kidney disease  
43 esrf - end stage renal failure  
44 escrf - end stage chronic renal failure  
45 esrd - end stage renal disease  
46 end stage chronic renal failure  
47 surgical construction of arteriovenous shunt  
48 formation of arteriovenous shunt  
49 arteriovenous shunt  
50 arteriovenostomy  
51 creation of arteriovenous shunt

1 av - creation of arteriovenous shunt  
2 construction of arteriovenous shunt  
3 kidney transplant failure and rejection  
4 familial nephrotic syndrome  
5 failure of sterile precautions during perfusion  
6 failure of sterile precautions during kidney dialysis  
7 failure of sterile precautions during other perfusion  
8 failure of sterile precautions during perfusion nos  
9 hypertensive renal failure  
10 anemia of chronic renal failure  
11 anemia of chronic renal insufficiency  
12 anaemia of chronic renal insufficiency  
13 goodpasture syndrome  
14 ns - nephrotic syndrome  
15 creation of brachial-cephalic fistula  
16 banding of arteriovenous fistula  
17 haemofiltration  
18 xenograft renal transplant  
19 congenital nephrotic syndrome with focal glomerulosclerosis  
20 nephrotic syndrome with pseudohermaphroditism  
21 drash syndrome  
22 rapidly progressive glomerulonephritis  
23 acute-on-chronic renal failure  
24 goodpasture's disease  
25 renal transplant rejection  
26 accelerated rejection of renal transplant  
27 very mild acute rejection of renal transplant  
28 borderline changes of acute rejection  
29 acute rejection of renal transplant  
30 acute rejection of renal transplant - grade i  
31 acute rejection of renal transplant - grade ii  
32 acute rejection of renal transplant - grade iii  
33 chronic rejection of renal transplant  
34 chronic transplant nephropathy  
35 chronic rejection of renal transplant - grade 1  
36 chronic rejection of renal transplant - grade ii  
37 chronic rejection of renal transplant - grade iii  
38 acute-on-chronic rejection of renal transplant  
39 continuous ambulatory peritoneal dialysis  
40 thrombectomy of arteriovenous fistula  
41 sle glomerulonephritis syndrome  
42 Systemic lupus erythematosus glomerulonephritis syndrome  
43 transplant of kidney  
44 kidney transplantation  
45 tx - renal transplantation  
46 kidney transplant  
47 tx - kidney transplantation  
48 renal graft  
49 pd - peritoneal dialysis  
50 interventions associated with transplantation of kidney

1  
2 allotransplantation of kidney from cadaver, heart-beating  
3 peritoneal dialysis nec  
4 interventions associated with transplantation of kidney nos  
5 post-transplantation of kidney examination, recipient  
6 [x]failure sterile precautions dur kidney dialys/other perf  
7 arteriovenous shunt  
8 pre-transplantation of kidney work-up, recipient  
9 post-transplantation of kidney examination, live donor  
10 pre-transplantation of kidney work-up, live donor  
11 creation of arteriovenous fistula nec  
12 repair of acquired arteriovenous fistula  
13 transplant nephrectomy  
14 compensation for renal failure  
15 renal dialysis  
16 [x]kidny dialysis caus abn reac pt/lat comp no misad at time  
17 chronic renal failure syndrome  
18 crf - chronic renal failure  
19 allotransplantation of kidney from cadaver nec  
20 unexplained episode of renal transplant dysfunction  
21 dialysis procedure  
22 excision of rejected transplanted kidney  
23 [x]renal tubulo-interstitial disorders/transplant rejection  
24 accid cut,puncture,perf,h'ge - kidney dialysis  
25 accid cut,puncture,perf,h'ge - kidney dialysis/oth perfusion  
26 accid cut,puncture,perf,h'ge - perfusion nos  
27 accidental cut/puncture/perf/haem'ge during renal dialysis  
28 history of renal transplant  
29 history of - kidney recipient  
30 anaemia secondary to renal failure  
31 acute nephrotic syndrm diffuse crescentic glomerulonephritis  
32 [v]kidney transplanted  
33 [v]renal dialysis status  
34 [v]aftercare involving intermittent dialysis  
35 [v]aftercare involving extracorporeal dialysis  
36 [x]other dialysis  
37 autotransplantation of kidney  
38 autotransplant kidney  
39 renal autotransplantation  
40 renal autotransplantation or reimplantation of kidney  
41 live donor renal allotransplant  
42 live donor renal allograft  
43 cadaver renal allotransplant  
44 cadaver renal allograft  
45 exploration of kidney transplant  
46 removal of chronic ambulatory peritoneal dialysis catheter  
47 allotransplantation of kidney from cadaver  
48 cnf - finnish congenital nephrotic syndrome  
49 nephrotic syndrome due to diabetes mellitus  
50 malarial nephrosis  
51 anaemia secondary to chronic renal failure  
52  
53  
54  
55  
56  
57  
58  
59  
60

1  
2 accidental cut, puncture, perforation or hemorrhage during kidney dialysis  
3 autotransplant of kidney  
4 transplantation of kidney  
5 creation of cimino fistula  
6 creation of brescia-cimino fistula  
7 creation brachiocephalic fistula  
8 hf - hemofiltration  
9 hf - haemofiltration  
10 hemofiltration  
11 haemofiltration therapy  
12 hemofiltration therapy  
13 chronic renal failure  
14 steroid-responsive nephrotic syndrome  
15 ssns - steroid-sensitive nephrotic syndrome  
16 wilms' tumor and nephrotic syndrome with pseudohermaphroditism  
17 rpgn - rapidly progressive glomerulonephritis  
18 acute on chronic renal failure  
19 goodpasture disease  
20 first use syndrome of dialysis  
21 chronic allograft nephropathy  
22 flushing of chronic ambulatory peritoneal dialysis catheter  
23 capd - continuous ambulatory peritoneal dialysis  
24 dialysis observation  
25 removal of transplanted kidney  
26 kidney dialysis  
27 artificial kidney dialysis  
28 chronic ambulatory peritoneal dialysis catheter procedure  
29 chronic kidney disease stage 3a  
30 chronic kidney disease stage 3b  
31 av - procedure related to surgical arteriovenous connection  
32 removal of rejected kidney  
33 hemodialysis procedure  
34 hd - hemodialysis  
35 hd - haemodialysis  
36 haemodialysis procedure  
37 extracorporeal hemodialysis  
38 extracorporeal haemodialysis  
39 hemodialysis  
40 chronic kidney disease stage 1 with proteinuria  
41 chronic kidney disease stage 2 with proteinuria  
42 chronic kidney disease stage 3 with proteinuria  
43 chronic kidney disease stage 3 without proteinuria  
44 chronic kidney disease stage 3a with proteinuria  
45 chronic kidney disease stage 3a without proteinuria  
46 chronic kidney disease stage 3b with proteinuria  
47 chronic kidney disease stage 3b without proteinuria  
48 chronic kidney disease stage 4 with proteinuria  
49 chronic kidney disease stage 4 without proteinuria  
50 chronic kidney disease stage 5 with proteinuria  
51 chronic kidney disease stage 5 without proteinuria  
52  
53  
54  
55  
56  
57  
58  
59  
60

1  
2 anemia secondary to renal failure  
3 creation of radial-cephalic fistula  
4 det.ren.func.after ren.transpl  
5 ckd stage 1 with proteinuria  
6 ckd stage 2 with proteinuria  
7 ckd stage 3 with proteinuria  
8 ckd stage 3 without proteinuria  
9 ckd stage 3a with proteinuria  
10 ckd stage 3a without proteinuria  
11 ckd stage 3b with proteinuria  
12 ckd stage 3b without proteinuria  
13 ckd stage 4 with proteinuria  
14 ckd stage 4 without proteinuria  
15 ckd stage 5 with proteinuria  
16 ckd stage 5 without proteinuria  
17 dialysis for renal failure  
18 ligation of arteriovenous dialysis fistula  
19 ligation of arteriovenous dialysis graft  
20 end stage renal failure  
21 end-stage renal disease  
22 failure of sterile precautions during renal dialysis  
23 nephrotic syn difus mesangial proliferativ glomerulonephritis  
24 nephrotic syn,diffuse mesangiocapillary glomerulonephritis  
25 nephrotic syn,difus endocapillary prolifitv glomerulonephritis  
26 Nephrotic syndrome in systemic lupus erythematosus  
27 nephrotic syndrome+membranoproliferative glomerulonephritis  
28 microcystic type congenital nephrotic syndrome  
29 extracorporeal albumin hemodialysis  
30 removal of thrombus of arteriovenous fistula  
31 post-transplantation of kidney examination of recipient  
32 finnish nephrosis syndrome  
33 infection of arteriovenous graft for haemodialysis  
34 infection of arteriovenous graft for hemodialysis  
35 infection of dialysis graft  
36 mechanical failure of apparatus during kidney dialysis  
37 mechanical failure of apparatus during renal dialysis  
38 ckd stage 4  
39 ckd stage 3  
40 ckd stage 5  
41 infection of haemodialysis arteriovenous fistula  
42 infection of arteriovenous fistula for hemodialysis  
43 infection of hd av fistula  
44 infection of hd arteriovenous fistula  
45 infection of arteriovenous fistula for haemodialysis  
46 ligation of acquired arteriovenous fistula  
47 kidney transplant with complication, without blame  
48 kidney dialysis with complication, without blame  
49 allotransplantation of kidney with dbd (donation after brain stem death)  
50 allotransplantation of kidney with dcd (donation after cardiac death)  
51 transplantation of kidney regime



1 insertion of ambulatory peritoneal dialysis catheter  
2 hyperten heart&renal dis+both(congestv)heart and renal fail  
3 ckd (chronic kidney disease stage) 1 with proteinuria  
4 ckd (chronic kidney disease) stage 2 with proteinuria  
5 ckd (chronic kidney disease) stage 3 with proteinuria  
6 ckd (chronic kidney disease) stage 3 without proteinuria  
7 ckd (chronic kidney disease) stage 3a with proteinuria  
8 ckd (chronic kidney disease) stage 3a without proteinuria  
9 ckd (chronic kidney disease) stage 3b with proteinuria  
10 ckd (chronic kidney disease) stage 3b without proteinuria  
11 ckd (chronic kidney disease) stage 4 with proteinuria  
12 ckd (chronic kidney disease) stage 4 without proteinuria  
13 ckd (chronic kidney disease) stage 5 with proteinuria  
14 ckd (chronic kidney disease) stage 5 without proteinuria  
15 congenital nephrotic syndrome  
16 chronic kidney disease with glomerular filtration rate category g1 and albuminuria category a3  
17 chronic kidney disease with glomerular filtration rate category g2 and albuminuria category a3  
18 chronic kidney disease with glomerular filtration rate category g3a and albuminuria category a1  
19 chronic kidney disease with glomerular filtration rate category g3a and albuminuria category a2  
20 chronic kidney disease with glomerular filtration rate category g3a and albuminuria category a3  
21 chronic kidney disease with glomerular filtration rate category g3b and albuminuria category a1  
22 chronic kidney disease with glomerular filtration rate category g3b and albuminuria category a2  
23 chronic kidney disease with glomerular filtration rate category g3b and albuminuria category a3  
24 chronic kidney disease with glomerular filtration rate category g4 and albuminuria category a1  
25 chronic kidney disease with glomerular filtration rate category g4 and albuminuria category a2  
26 chronic kidney disease with glomerular filtration rate category g4 and albuminuria category a3  
27 chronic kidney disease with glomerular filtration rate category g5 and albuminuria category a1  
28 chronic kidney disease with glomerular filtration rate category g5 and albuminuria category a2  
29 chronic kidney disease with glomerular filtration rate category g5 and albuminuria category a3  
30 goodpasture's syndrome  
31 kidney replacement nos  
32 kidney replacement  
33 nephrotic syndrome  
34 extracorporeal kidney  
35 renal transplant rejected  
36 transplantation of kidney from cadaver  
37 transplantation of kidney from live donor  
38 [rfc] renal transplant  
39 renal transplant rejected  
40 chronic kidney disease stage 3  
41 chronic kidney disease stage 4  
42 chronic kidney disease stage 5  
43 Chronic pyelonephritis  
44 Chronic pyelonephritis without medullary necrosis  
45 XGP - Xanthogranulomatous pyelonephritis  
46 Obstructive pyelonephritis  
47 Subacute pyelonephritis  
48 Chronic pyelonephritis NOS  
49 Xanthogranulomatous pyelonephritis  
50 Tuberculous pyelonephritis

- 1
- 2 Calculous pyelonephritis
- 3 Healed pyelonephritis
- 4 Secondary pyelonephritis
- 5 XGPN - Xanthogranulomatous pyelonephritis
- 6 Diffuse pyelonephritis
- 7
- 8 Non-obstructive reflux-associated chronic pyelonephritis
- 9 Chronic non-obstructive atrophic pyelonephritis
- 10 Nonobstructive reflux-associated chronic pyelonephritis
- 11 Chronic pyelonephritis with medullary necrosis
- 12 Familial non-obstructive reflux-associated chronic pyelonephritis
- 13 Recurrent obstructive pyelonephritis
- 14 CPN - Chronic pyelonephritis
- 15 Chronic obstructive pyelonephritis
- 16 Renal dwarfism
- 17 Acute renal papillary necrosis with renal failure
- 18 Renal rickets
- 19 Chronic nephritic syndrome, diffuse endocapillary proliferative glomerulonephritis
- 20 Chronic nephritic syndrome
- 21 Chronic nephritic syndrome, minor glomerular abnormality
- 22 Chronic nephritic syndrome co-occurrent and due to membranoproliferative glomerulonephritis type III
- 23 Chronic nephritic syndrome, diffuse mesangiocapillary glomerulonephritis
- 24 Chronic nephritic syndrome, diffuse crescentic glomerulonephritis
- 25 Chronic nephritic syndrome, dense deposit disease
- 26 Chronic nephritic syndrome with membranous glomerulonephritis
- 27 Chronic nephritic syndrome, focal and segmental glomerular lesions
- 28 Morphologic change of kidney due to chronic nephritic syndrome
- 29 Chronic nephritic syndrome, diffuse mesangial proliferative glomerulonephritis
- 30 Chronic nephritic syndrome, diffuse membranous glomerulonephritis
- 31 Other nephritis and nephrosis NOS
- 32 Other specified nephritis, nephrosis or nephrotic syndrome
- 33 Nephritis, nephrosis and nephrotic syndrome NOS
- 34 Nephritis, nephrosis and nephrotic syndrome
- 35 Nephritis, nephrosis and nephrotic syndrome
- 36 Other nephritis and nephrosis in diseases EC
- 37 Other nephritis and nephrosis unspecified
- 38 Membranoproliferative nephritis unspecified
- 39 Chronic pyonephrosis
- 40 Chronic pyelitis
- 41 Isolated proteinuria, with oth specif morpholog changes
- 42 Isolated proteinuria
- 43 Isolated proteinuria with specified morphological lesion, diffuse concentric glomerulonephritis
- 44 Isolated proteinuria with specified morphological lesion, dense deposit disease
- 45 Isolated proteinuria with specified morphological lesion, diffuse endocapillary proliferative glomerulonephriti
- 46 Isolated non-nephrotic proteinuria
- 47 Isolated proteinuria with specified morphological lesion, focal and segmental glomerular lesions
- 48 Isolated proteinuria, with unspecified morpholog changes
- 49 [X]Isolated proteinuria, with unspecified morphological changes
- 50 Isolated proteinuria co-occurrent and due to membranoproliferative glomerulonephritis type III
- 51 Isolated proteinuria co-occurrent and due to membranoproliferative glomerulonephritis type 3
- 52 [X]Isolated proteinuria, with oth specif morpholog changes
- 53
- 54
- 55
- 56
- 57
- 58
- 59
- 60

1 Isolated proteinuria with specified morphological lesion, diffuse membranous glomerulonephritis  
2 Isolated proteinuria with specified morphological lesion, diffuse mesangial proliferative glomerulonephritis  
3 [X]Isolated proteinuria, with unspecified morphological changes  
4 Isolated proteinuria with specified morphological lesion, diffuse mesangiocapillary glomerulonephritis  
5 Isolated proteinuria with specified morphological lesion  
6 Isolated proteinuria with specified morphological lesion, minor glomerular abnormality  
7 Recurrent haematuria co-occurrent and due to diffuse mesangiocapillary glomerulonephritis  
8 MCGN - Mesangiocapillary glomerulonephritis  
9 Mesangiocapillary glomerulonephritis type II  
10 Hereditary diffuse mesangiocapillary glomerulonephritis  
11 Mesangiocapillary glomerulonephritis, type II  
12 Persistent haematuria co-occurrent and due to diffuse mesangiocapillary glomerulonephritis  
13 Mesangiocapillary glomerulonephritis type III  
14 Subendothelial mesangiocapillary glomerulonephritis  
15 Hereditary mesangiocapillary glomerulonephritis, type 2  
16 Mesangiocapillary glomerulonephritis  
17 MCGNdd - Mesangiocapillary glomerulonephritis, dense deposit  
18 Mesangiocapillary glomerulonephritis type IV  
19 Acute nephritic syndrome, diffuse mesangiocapillary glomerulonephritis  
20 MCGN type II - Mesangiocapillary glomerulonephritis type II  
21 MCGN type I - Mesangiocapillary glomerulonephritis type I  
22 Mesangiocapillary glomerulonephritis, type I  
23 MCGN type III - Mesangiocapillary glomerulonephritis type III  
24 Mesangiocapillary glomerulonephritis type I  
25 [X]Hereditary nephropathy NEC diffuse mesangiocapillary glomerulonephritis  
26 Recurrent haematuria co-occurrent and due to diffuse mesangiocapillary glomerulonephritis  
27 MCGN type IV - Mesangiocapillary glomerulonephritis type IV  
28 Persistent haematuria co-occurrent and due to diffuse mesangiocapillary glomerulonephritis  
29 Unspecified nephritic syndrome, diffuse mesangial proliferative glomerulonephritis  
30 Chronic mesangial proliferative glomerulonephritis  
31 Mesangial proliferative glomerulonephritis  
32 Focal mesangial proliferative glomerulonephritis  
33 SLE with mesangial proliferative glomerulonephritis  
34 Mesangial IgM proliferative glomerulonephritis  
35 Recurrent haematuria co-occurrent and due to diffuse mesangial proliferative glomerulonephritis  
36 Recurrent haematuria co-occurrent and due to diffuse mesangial proliferative glomerulonephritis  
37 Hereditary nephropathy NEC diffuse mesangial proliferative glomerulonephritis  
38 Hereditary diffuse mesangial proliferative glomerulonephritis  
39 Persistent haematuria co-occurrent and due to diffuse mesangial proliferative glomerulonephritis  
40 [X]Unspecified nephritic syndrome, diffuse mesangial proliferative glomerulonephritis  
41 Chronic mesangial proliferative glomerulonephritis  
42 Persistent haematuria co-occurrent and due to diffuse mesangial proliferative glomerulonephritis  
43 Acute nephritic syndrome, diffuse mesangial proliferative glomerulonephritis  
44 PGN - Chronic mesangial proliferative glomerulonephritis  
45 Mixed renal osteodystrophy  
46 Suspected renal osteodystrophy  
47 ROD - Renal osteodystrophy, assessment  
48 Renal osteodystrophy assessment  
49 ROD - Renal osteodystrophy  
50 Renal osteodystrophy NOS

1 Renal osteodystrophy  
2  
3 Renal secondary osteodystrophia fibrosa  
4 Chronic glomerulonephritis + diseases EC  
5 Chronic glomerulonephritis  
6 CGN - Chronic glomerulonephritis  
7  
8 Other chronic glomerulonephritis NOS  
9 Chronic glomerulonephritis NOS  
10 Chronic glomerulonephritis associated with another disorder  
11 Other chronic glomerulonephritis  
12 Chronic exudative glomerulonephritis  
13  
14 End stage renal disease due to hypertension  
15 ESRD (End stage renal disease) due to benign hypertension  
16 End stage renal disease due to benign hypertension  
17 Renal sclerosis with hypertension  
18 Renal disease due to hypertension  
19  
20 End stage renal disease on dialysis due to hypertension  
21 ESRD (End stage renal disease) due to hypertension  
22 Parenchymal renal hypertension  
23 Other familial glomerulonephritis  
24 Familial glomerulonephritis in Alport's syndrome  
25 Familial lobular glomerulopathy  
26 Familial hypoplastic, glomerulocystic kidney  
27  
28 CIN - Chronic interstitial nephritis  
29 Chronic interstitial nephritis  
30  
31 Chronic drug-induced tubulointerstitial nephritis  
32 Idiopathic chronic interstitial nephritis  
33 Chronic drug induced tubulointerstitial nephritis  
34 Chronic infective interstitial nephritis  
35 Chronic toxic interstitial nephritis  
36 Chronic arteriosclerotic nephritis  
37  
38 Chronic interstitial nephritis due to heavy metals  
39 Chronic radiation nephritis  
40 Chronic interstitial nephritis caused by heavy metals  
41 CTIN - Chronic tubulo-interstitial nephritis  
42 Chronic tubulo-interstitial nephritis  
43 [X]Other chronic tubulo-interstitial nephritis  
44 Chronic drug-induced interstitial nephritis  
45 Acute on chronic interstitial nephritis  
46  
47 Chronic tubulointerstitial nephritis  
48 Granulomatous interstitial nephritis  
49 Familial interstitial nephritis  
50 Idiopathic interstitial nephritis  
51  
52  
53  
54  
55  
56  
57  
58  
59  
60

1  
2  
3  
4  
5  
6  
7  
8  
9  
10  
11  
12  
13  
14  
15  
16  
17  
18  
19  
20  
21  
22  
23  
24  
25  
26  
27  
28  
29  
30  
31  
32  
33  
34  
35  
36  
37  
38  
39  
40  
41  
42  
43  
44  
45  
46  
47  
48  
49  
50  
51  
52  
53  
54  
55  
56  
57  
58  
59  
60

For peer review only

1  
2  
3  
4  
5  
6  
7  
8  
9  
10  
11  
12  
13  
14  
15  
16  
17  
18  
19  
20  
21  
22  
23  
24  
25  
26  
27  
28  
29  
30  
31  
32  
33  
34  
35  
36  
37  
38  
39  
40  
41  
42  
43  
44  
45  
46  
47  
48  
49  
50  
51  
52  
53  
54  
55  
56  
57  
58  
59  
60

For peer review only

1  
2  
3  
4  
5  
6  
7  
8  
9  
10  
11  
12  
13  
14  
15  
16  
17  
18  
19  
20  
21  
22  
23  
24  
25  
26  
27  
28  
29  
30  
31  
32  
33  
34  
35  
36  
37  
38  
39  
40  
41  
42  
43  
44  
45  
46  
47  
48  
49  
50  
51  
52  
53  
54  
55  
56  
57  
58  
59  
60

For peer review only

1  
2  
3  
4  
5  
6  
7  
8  
9  
10  
11  
12  
13  
14  
15  
16  
17  
18  
19  
20  
21  
22  
23  
24  
25  
26  
27  
28  
29  
30  
31  
32  
33  
34  
35  
36  
37  
38  
39  
40  
41  
42  
43  
44  
45  
46  
47  
48  
49  
50  
51  
52  
53  
54  
55  
56  
57  
58  
59  
60

For peer review only



1  
2  
3  
4  
5  
6  
7  
8  
9  
10  
11  
12  
13  
14  
15  
16  
17  
18  
19  
20  
21  
22  
23  
24  
25  
26  
27  
28  
29  
30  
31  
32  
33  
34  
35  
36  
37  
38  
39  
40  
41  
42  
43  
44  
45  
46  
47  
48  
49  
50  
51  
52  
53  
54  
55  
56  
57  
58  
59  
60

For peer review only

1  
2  
3  
4  
5  
6  
7  
8  
9  
10  
11  
12  
13  
14  
15  
16  
17  
18  
19  
20  
21  
22  
23  
24  
25  
26  
27  
28  
29  
30  
31  
32  
33  
34  
35  
36  
37  
38  
39  
40  
41  
42  
43  
44  
45  
46  
47  
48  
49  
50  
51  
52  
53  
54  
55  
56  
57  
58  
59  
60

For peer review only

1  
2  
3  
4  
5  
6  
7  
8  
9  
10  
11  
12  
13  
14  
15  
16  
17  
18  
19  
20  
21  
22  
23  
24  
25  
26  
27  
28  
29  
30  
31  
32  
33  
34  
35  
36  
37  
38  
39  
40  
41  
42  
43  
44  
45  
46  
47  
48  
49  
50  
51  
52  
53  
54  
55  
56  
57  
58  
59  
60

For peer review only

1  
2  
3  
4  
5  
6  
7  
8  
9  
10  
11  
12  
13  
14  
15  
16  
17  
18  
19  
20  
21  
22  
23  
24  
25  
26  
27  
28  
29  
30  
31  
32  
33  
34  
35  
36  
37  
38  
39  
40  
41  
42  
43  
44  
45  
46  
47  
48  
49  
50  
51  
52  
53  
54  
55  
56  
57  
58  
59  
60

For peer review only

1  
2  
3  
4  
5  
6  
7  
8  
9  
10  
11  
12  
13  
14  
15  
16  
17  
18  
19  
20  
21  
22  
23  
24  
25  
26  
27  
28  
29  
30  
31  
32  
33  
34  
35  
36  
37  
38  
39  
40  
41  
42  
43  
44  
45  
46  
47  
48  
49  
50  
51  
52  
53  
54  
55  
56  
57  
58  
59  
60

For peer review only

is

1  
2  
3  
4  
5  
6  
7  
8  
9  
10  
11  
12  
13  
14  
15  
16  
17  
18  
19  
20  
21  
22  
23  
24  
25  
26  
27  
28  
29  
30  
31  
32  
33  
34  
35  
36  
37  
38  
39  
40  
41  
42  
43  
44  
45  
46  
47  
48  
49  
50  
51  
52  
53  
54  
55  
56  
57  
58  
59  
60

For peer review only

| ICD-10 code | Term                            |
|-------------|---------------------------------|
| N18.5       | Chronic kidney disease stage IV |
| N18.9       | Chronic kidney disease stage V  |

For peer review only

| 1  | Medcodeid        | Term                                                                 |
|----|------------------|----------------------------------------------------------------------|
| 2  | 451442010        | Oesophageal varices in cirrhosis of the liver                        |
| 3  | 453265010        | Oesophageal varices in alcoholic cirrhosis of the liver              |
| 4  | 5992721000006114 | Esophageal varices in alcoholic cirrhosis of the liver               |
| 5  | 5975531000006117 | Esophageal varices in cirrhosis of the liver                         |
| 6  | 126721013        | Florid cirrhosis                                                     |
| 7  | 303425016        | Capsular portal cirrhosis                                            |
| 8  | 396392016        | Juvenile portal cirrhosis                                            |
| 9  | 451442010        | Oesophageal varices in cirrhosis of the liver                        |
| 10 | 493707012        | Hypertrophic portal cirrhosis                                        |
| 11 | 2576980018       | Portal cirrhosis                                                     |
| 12 | 1736361000000112 | Cystic fibrosis related cirrhosis                                    |
| 13 | 123999018        | Congestive cirrhosis                                                 |
| 14 | 396393014        | Non-alcoholic cirrhosis NOS                                          |
| 15 | 55851000006118   | Xanthomatous portal cirrhosis                                        |
| 16 | 2598551000006118 | ICC - Indian childhood cirrhosis                                     |
| 17 | 8242561000006112 | Cirrhosis associated with cystic fibrosis                            |
| 18 | 3713571000006114 | Congestive cirrhosis                                                 |
| 19 | 5524681000006114 | Cirrhosis secondary to cholestasis                                   |
| 20 | 6941931000006112 | Laennec's cirrhosis                                                  |
| 21 | 5493051000006111 | Cirrhosis of liver not due to alcohol                                |
| 22 | 4353661000006114 | Cholangiolitic cirrhosis                                             |
| 23 | 7875311000006114 | Cirrhosis of liver caused by methyldopa                              |
| 24 | 7518231000006111 | NAIC - North American Indian childhood cirrhosis                     |
| 25 | 7738891000006115 | Idiopathic copper associated cirrhosis of liver                      |
| 26 | 2754821000006111 | Syphilitic cirrhosis                                                 |
| 27 | 7559281000006114 | HMDPC - hypermanganesemia with dystonia, polycythaemia and cirrhosis |
| 28 | 2847631000006117 | Micronodular cirrhosis                                               |
| 29 | 3515305014       | Cirrhosis of liver with primary sclerosing cholangitis               |
| 30 | 3905811000006110 | Postnecrotic cirrhosis                                               |
| 31 | 7868601000006115 | Cardiomyopathy co-occurrent and due to cirrhosis of liver            |
| 32 | 7875301000006111 | Cirrhosis of liver caused by amiodarone                              |
| 33 | 7966981000006110 | Cirrhosis of liver due to chronic hepatitis C                        |
| 34 | 8032261000006117 | Cirrhosis of liver due to hepatitis B                                |
| 35 | 6349661000006117 | Early cirrhosis                                                      |
| 36 | 7043971000006117 | Drug-induced cirrhosis of liver                                      |
| 37 | 7559271000006111 | HMDPC - hypermanganesemia with dystonia, polycythemia and cirrhosis  |
| 38 | 7875291000006110 | Cirrhosis of liver caused by methotrexate                            |
| 39 | 3772081000006115 | Pigment cirrhosis                                                    |
| 40 | 7043981000006119 | Drug-induced hepatic cirrhosis                                       |
| 41 | 6617771000006112 | Bronze cirrhosis                                                     |
| 42 | 5992721000006114 | Esophageal varices in alcoholic cirrhosis of the liver               |
| 43 | 3010831000006117 | Hanot's cirrhosis                                                    |
| 44 | 3713561000006119 | Cardiac cirrhosis                                                    |
| 45 | 476611000006116  | Alcoholic cirrhosis of liver                                         |
| 46 | 2579818016       | Laennec's cirrhosis                                                  |
| 47 | 303438012        | Cardituberculous cirrhosis                                           |
| 48 | 303781011        | [X]Other and unspecified cirrhosis of liver                          |
| 49 | 906081000006114  | [RFC] Cirrhosis                                                      |
| 50 | 353621011        | Laennec's cirrhosis, non-alcoholic                                   |



|    |                  |                                                              |
|----|------------------|--------------------------------------------------------------|
| 1  |                  |                                                              |
| 2  | 453265010        | Oesophageal varices in alcoholic cirrhosis of the liver      |
| 3  | 303393017        | Cirrhosis and chronic liver disease                          |
| 4  | 303414013        | Unilobular portal cirrhosis                                  |
| 5  | 11267010         | Indian childhood cirrhosis                                   |
| 6  | 7743871000006114 | Decompensated cirrhosis of liver                             |
| 7  | 4355091000006112 | Latent cirrhosis                                             |
| 8  | 4353651000006112 | Nutritional cirrhosis                                        |
| 9  | 2598561000006116 | Cirrhosis-familial with pulmonary hypertension               |
| 10 | 2816681000006110 | CL - Cirrhosis of liver                                      |
| 11 | 6947471000006110 | Alcoholic liver cirrhosis                                    |
| 12 | 3206871000006111 | Macronodular cirrhosis                                       |
| 13 | 226161000006113  | Pipe-stem portal cirrhosis                                   |
| 14 | 303442010        | Portal cirrhosis unspecified                                 |
| 15 | 303439016        | Syphilitic portal cirrhosis                                  |
| 16 | 303518014        | Toxic liver disease with fibrosis and cirrhosis of liver     |
| 17 | 396390012        | Multilobular portal cirrhosis                                |
| 18 | 7743881000006112 | Decompensated cirrhosis                                      |
| 19 | 5087011000006114 | Hypoxia-associated cirrhosis                                 |
| 20 | 603321000006118  | Cryptogenic cirrhosis                                        |
| 21 | 2935051000006118 | Posthepatic cirrhosis                                        |
| 22 | 2507081000006119 | Glissonian cirrhosis                                         |
| 23 | 6883751000006115 | Vandellia cirrhosa                                           |
| 24 | 3206891000006112 | PNC - Postnecrotic cirrhosis                                 |
| 25 | 2816671000006112 | Hepatic cirrhosis                                            |
| 26 | 5086991000006115 | Laennec cirrhosis, non-alcoholic                             |
| 27 | 4787221000006115 | Pipestem portal cirrhosis                                    |
| 28 | 4787261000006114 | Zooparasitic portal cirrhosis                                |
| 29 | 550431000006116  | Childhood function cirrhosis                                 |
| 30 | 731231000006114  | Macronodular cirrhosis of liver                              |
| 31 | 803961000006119  | Glycogenosis with hepatic cirrhosis                          |
| 32 | 1786709019       | Pigmentary cirrhosis of liver                                |
| 33 | 303419015        | Diffuse nodular cirrhosis                                    |
| 34 | 303420014        | Fatty portal cirrhosis                                       |
| 35 | 303433015        | Pigmentary portal cirrhosis                                  |
| 36 | 303458013        | Portal fibrosis without cirrhosis                            |
| 37 | 7518221000006113 | North American Indian childhood cirrhosis                    |
| 38 | 5152271000006110 | Clay pipe-stem cirrhosis                                     |
| 39 | 221111000000114  | Cirrhosis - non-alcoholic                                    |
| 40 | 353613017        | Cirrhosis of liver                                           |
| 41 | 7559261000006116 | Hypermanganesemia with dystonia, polycythemia, and cirrhosis |
| 42 | 6941941000006119 | PC - Portal cirrhosis                                        |
| 43 | 2824431000006111 | Progressive neuronal degeneration with liver cirrhosis       |
| 44 | 3206901000006111 | Multilobar cirrhosis                                         |
| 45 | 6947461000006115 | Alcoholic cirrhosis                                          |
| 46 | 2526441000006114 | Cholangitic cirrhosis                                        |
| 47 | 5975531000006117 | Esophageal varices in cirrhosis of the liver                 |
| 48 | 2753761000006112 | Mixed micro AND macronodular cirrhosis                       |
| 49 | 6617781000006110 | Bronzed cirrhosis                                            |
| 50 | 211821000006111  | Postnecrotic cirrhosis of liver                              |
| 51 | 477604016        | Mixed portal cirrhosis                                       |

|    |                  |                                                                           |
|----|------------------|---------------------------------------------------------------------------|
| 1  |                  |                                                                           |
| 2  | 303435010        | Toxic portal cirrhosis                                                    |
| 3  | 3033421000006115 | Parasitic cirrhosis                                                       |
| 4  | 8458711000006115 | Ascites due to alcoholic cirrhosis                                        |
| 5  | 4353641000006110 | Toxic cirrhosis                                                           |
| 6  | 4403611000006113 | Acquired portal-systemic shunt due to cirrhosis                           |
| 7  |                  |                                                                           |
| 8  | 3515307018       | Cirrhosis of liver co-occurrent and due to primary sclerosing cholangitis |
| 9  | 4355101000006118 | Advanced cirrhosis                                                        |
| 10 | 2526451000006111 | Cholestatic cirrhosis                                                     |
| 11 | 5493041000006114 | Cirrhosis, nonalcoholic                                                   |
| 12 |                  |                                                                           |
| 13 | 1763641000006113 | Cirrhosis of liver due to cystic fibrosis                                 |
| 14 | 303437019        | Bacterial portal cirrhosis                                                |
| 15 | 303440019        | Zooparasitic portal cirrhosis                                             |
| 16 | 7559251000006118 | Hypermanganesemia with dystonia, polycythaemia, and cirrhosis             |
| 17 | 303441015        | Infectious cirrhosis                                                      |
| 18 |                  |                                                                           |
| 19 |                  |                                                                           |
| 20 |                  |                                                                           |
| 21 |                  |                                                                           |
| 22 |                  |                                                                           |
| 23 |                  |                                                                           |
| 24 |                  |                                                                           |
| 25 |                  |                                                                           |
| 26 |                  |                                                                           |
| 27 |                  |                                                                           |
| 28 |                  |                                                                           |
| 29 |                  |                                                                           |
| 30 |                  |                                                                           |
| 31 |                  |                                                                           |
| 32 |                  |                                                                           |
| 33 |                  |                                                                           |
| 34 |                  |                                                                           |
| 35 |                  |                                                                           |
| 36 |                  |                                                                           |
| 37 |                  |                                                                           |
| 38 |                  |                                                                           |
| 39 |                  |                                                                           |
| 40 |                  |                                                                           |
| 41 |                  |                                                                           |
| 42 |                  |                                                                           |
| 43 |                  |                                                                           |
| 44 |                  |                                                                           |
| 45 |                  |                                                                           |
| 46 |                  |                                                                           |
| 47 |                  |                                                                           |
| 48 |                  |                                                                           |
| 49 |                  |                                                                           |
| 50 |                  |                                                                           |
| 51 |                  |                                                                           |
| 52 |                  |                                                                           |
| 53 |                  |                                                                           |
| 54 |                  |                                                                           |
| 55 |                  |                                                                           |
| 56 |                  |                                                                           |
| 57 |                  |                                                                           |
| 58 |                  |                                                                           |
| 59 |                  |                                                                           |
| 60 |                  |                                                                           |

| ICD-10 code | Term                                     |
|-------------|------------------------------------------|
| K74.1       | Hepatic sclerosis                        |
| K74.2       | Hepatic fibrosis with hepatic sclerosis  |
| K74.3       | Primary biliary cirrhosis                |
| K74.4       | Secondary biliary cirrhosis              |
| K74.5       | Biliary cirrhosis, unspecified           |
| K74.6       | Other and unspecified cirrhosis of liver |
| K74.60      | Unspecified cirrhosis of liver           |
| K74.69      | Other cirrhosis of liver                 |

For peer review only

|    |                  |
|----|------------------|
| 1  |                  |
| 2  | Medcodeid        |
| 3  | 103777013        |
| 4  | 117168016        |
| 5  | 270232016        |
| 6  | 270616014        |
| 7  | 272325018        |
| 8  | 272389014        |
| 9  | 324973015        |
| 10 | 324974014        |
| 11 | 324975010        |
| 12 | 348547019        |
| 13 | 348550016        |
| 14 | 354610013        |
| 15 | 354613010        |
| 16 | 354616019        |
| 17 | 354621016        |
| 18 | 354628010        |
| 19 | 413415016        |
| 20 | 474471011        |
| 21 | 855601000006117  |
| 22 | 864761000006115  |
| 23 | 988961000006115  |
| 24 | 1711491000006119 |
| 25 | 1711511000006113 |
| 26 | 2189151000000117 |
| 27 | 2191221000000118 |
| 28 | 2197961000000113 |
| 29 | 1620531000006113 |
| 30 | 270768010        |
| 31 | 270777015        |
| 32 | 272326017        |
| 33 | 272327014        |
| 34 | 31211000006119   |
| 35 | 177251000006119  |
| 36 | 225661000006111  |
| 37 | 380061000000118  |
| 38 | 478131000006115  |
| 39 | 1905531000006112 |
| 40 | 859491000006112  |
| 41 | 900121000006113  |
| 42 | 1227663018       |
| 43 | 3527364013       |
| 44 | 3647071000006110 |
| 45 | 5039311000006114 |
| 46 | 5096171000006118 |
| 47 | 4542501000006119 |
| 48 | 3532180010       |
| 49 | 4663311000006116 |
| 50 | 2786011000006112 |
| 51 | 5340221000006117 |

For peer review only

1 4669451000006113  
2 3647061000006115  
3 12458801000006116  
4 4542461000006119  
5 4542691000006113  
6 3022121000006117  
7 7688001000006116  
8 4668981000006117  
9 2786021000006116  
10 3647051000006117  
11 4663811000006112  
12 3930661000006110  
13 4410641000006115  
14 4668961000006110  
15 7104131000006119  
16 5039331000006115  
17 2786001000006114  
18 4661791000006112  
19 4663791000006113  
20 864951000006119  
21 2560511000006119  
22 3786771000006114  
23 7237331000006116  
24 7237321000006119  
25 7316561000006118  
26 2618391000006114  
27 9935651000006116  
28 7279701000006119  
29 3346301000006113  
30 6948351000006111  
31 7838631000006116  
32 8030371000006119  
33 8453111000006110  
34 11910651000006112  
35 3653831000006114  
36 5161091000006119  
37 5096231000006110  
38 7237731000006117  
39 7139341000006119  
40 7254711000006117  
41 7985891000006113  
42 2666681000006118  
43 5087211000006119  
44 7791461000006114  
45 5057551000006110  
46 7351231000006114  
47 2641011000006119  
48 2641021000006110  
49 7766401000006118  
50 5039351000006110

For peer review only

1  
2 6018741000006111  
3 7385581000006116  
4 3636952011  
5 7710041000006114  
6 7475631000006115  
7 7986241000006112  
8 7150611000006118  
9 7566431000006113  
10 8335521000006117  
11 7791471000006119  
12 8453081000006116  
13 7100591000006115  
14 7710031000006116  
15 5039341000006113  
16 5157601000006116  
17 3534658012  
18 5039371000006117  
19 7170221000006110  
20 7838621000006119  
21 7566411000006119  
22 8115451000006112  
23 2868911000006114  
24 3598901000006118  
25 3786781000006112  
26 5959291000006115  
27 7383621000006115  
28 6932441000006115  
29 7507901000006114  
30 8268201000006117  
31 3527360016  
32 3033691000006115  
33 3670311000006119  
34 3915911000006117  
35 5096031000006117  
36 7785581000006115  
37 7507891000006110  
38 7838611000006110  
39 7566391000006119  
40 2949531000006115  
41 6948341000006114  
42 7189591000006110  
43 8325471000006118  
44 12458821000006114  
45 8117811000006119  
46 8348931000006116  
47 2447021000000110  
48 5087221000006110  
49 5057581000006119  
50 5096241000006117  
51 7103511000006119

For peer review only

1  
2 7184551000006117  
3 2660021000006113  
4 5039361000006112  
5 5096051000006112  
6 3527362012  
7  
8 8453711000006114  
9 12019461000006111  
10 7133421000006117  
11 3534651018  
12 4218231000006113  
13 4745181000006113  
14 5057571000006117  
15 7150631000006112  
16 7791441000006110  
17 8293001000006116  
18 7080931000006116  
19 7148541000006115  
20 2666671000006116  
21 3653841000006116  
22 90511000006115  
23 1549841000006116  
24 460649019  
25 461518012  
26 7986201000006110  
27 7752391000006113  
28 4323211000006112  
29 8325851000006114  
30 4319871000006111  
31 8325771000006113  
32 2868901000006111  
33 5161121000006115  
34 2660011000006117  
35 12031651000006118  
36 8284621000006118  
37 3825411000006114  
38 7475621000006118  
39 8450901000006118  
40 6718281000006112  
41 3973131000006117  
42 4779991000006112  
43 7714921000006112  
44 7181301000006112  
45 5057561000006112  
46 5161131000006117  
47 3825401000006111  
48 5980831000006116  
49 7385571000006119  
50 7298951000006115  
51 8313221000006113  
52 8325881000006118

For peer review only

1  
2 3455171000006118  
3 460955014  
4 4663831000006118  
5 4661761000006116  
6 7688541000006114  
7  
8 460645013  
9 754061000006111  
10 460643018  
11 1227661016  
12 384481000006118  
13 42151000006116  
14 270234015  
15 270618010  
16 1713291000006119  
17 1713331000006114  
18 2676200013  
19 354623018  
20 354627017  
21 422992018  
22 324971018  
23 270615013  
24 501594013  
25 7150641000006119  
26 8321131000006112  
27 7767241000006119  
28 7786611000006116  
29 5161291000006110  
30 5059341000006114  
31 7167121000006113  
32 7212371000006110  
33 7167141000006118  
34 7190521000006119  
35 7688081000006113  
36 5056471000006118  
37 11910741000006116  
38 380101000000116  
39 822591000006117  
40 6932431000006113  
41 8321141000006119  
42 7613121000006116  
43 12019471000006116  
44 6024591000006114  
45 5094171000006114  
46 7150621000006114  
47 8327141000006110  
48 7351241000006116  
49 5340201000006110  
50 3534653015  
51 933321000006111  
52 5096191000006117

For peer review only



1 4410651000006118  
2 4663841000006111  
3 3023061000006115  
4 3023081000006113  
5 5486891000006118  
6 460650019  
7 42161000006119  
8 268099017  
9 268100013  
10 270767017  
11 2209021000000112  
12 2234621000000111  
13 7766381000006118  
14 354612017  
15 270621012  
16 30458014  
17 2160027017  
18 403103015  
19 7484221000006112  
20 3973121000006115  
21 5161281000006112  
22 7150601000006116  
23 4319661000006117  
24 6585661000006112  
25 7767231000006112  
26 362091000000110  
27 460651015  
28 3636384014  
29 2890701000006112  
30 8325791000006114  
31 6933861000006111  
32 4319821000006110  
33 6316361000006112  
34 7167181000006112  
35 5053751000006110  
36 7566421000006110  
37 7767221000006114  
38 7565141000006116  
39 8348921000006119  
40 7167131000006111  
41 7569841000006114  
42 7238481000006111  
43 7710051000006111  
44 5599451000006111  
45 7385561000006114  
46 4661751000006118  
47 4668951000006113  
48 4669011000006116  
49 7080381000006116  
50 6933851000006114

For peer review only

1  
2 4668971000006115  
3 3485411000006113  
4 3022131000006119  
5 424791000006110  
6 500371000006119  
7 500401000006116  
8 1550021000006110  
9 324977019  
10 55971000006117  
11 90461000006118  
12 270233014  
13 2209101000000119  
14 2234541000000115  
15 906351000006116  
16 272320011  
17 354617011  
18 8335251000006112  
19 2560521000006110  
20 5096271000006113  
21 7168651000006111  
22 7171231000006119  
23 8284921000006111  
24 7279711000006116  
25 7985971000006118  
26 5647621000006110  
27 177341000006111  
28 7791451000006112  
29 8115511000006112  
30 8325761000006118  
31 8325871000006116  
32 5096281000006111  
33 3455181000006115  
34 8325481000006115  
35 8451601000006117  
36 5538541000006110  
37 12458511000006115  
38 5647611000006119  
39 7254721000006113  
40 460644012  
41 4323341000006116  
42 90471000006113  
43 372621000000114  
44 7496071000006114  
45 7139351000006117  
46 7214301000006113  
47 12719481000006116  
48 4542701000006113  
49 3647031000006112  
50 5043991000006117  
51 4663821000006116

For peer review only

1  
2 5043981000006115  
3 4669051000006115  
4 8258171000006110  
5 3022141000006112  
6 7688041000006119  
7 3022111000006113  
8 7091541000006113  
9 478111000006114  
10 818821000006110  
11 376141000000113  
12 90421000006112  
13 2198001000000111  
14 2198141000000110  
15 1800881000000119  
16 1709421000006118  
17 864281000006116  
18 225671000006116  
19 2160021016  
20 73655011  
21 270612011  
22 270614012  
23 270766014  
24 324970017  
25 324976011  
26 353974015  
27 354624012  
28 354631011  
29 3790671000006119  
30 2626431000006112  
31 7090481000006112  
32 12031641000006115  
33 5980821000006119  
34 7132471000006114  
35 7766371000006116  
36 11909781000006115  
37 11913051000006114  
38 2937111000006111  
39 3915921000006113  
40 7238471000006113  
41 8090361000006115  
42 5593651000006110  
43 3516351000006115  
44 7791431000006117  
45 8325861000006111  
46 3737491000006113  
47 8325781000006111  
48 7209391000006119  
49 3534659016  
50 2743241000000110  
51 8325891000006115  
52  
53  
54  
55  
56  
57  
58  
59  
60

For peer review only

1  
2 5161081000006117  
3 3260851000006117  
4 11913041000006112  
5 8335261000006114  
6 7133411000006113  
7 7348311000006117  
8 7766391000006115  
9 7080921000006119  
10 5044001000006114  
11 5157591000006112  
12 7569831000006116  
13 7932051000006112  
14 3292751000006114  
15 12719251000006111  
16 90611000006119  
17 399381000000115  
18 3022151000006114  
19 3515071000006117  
20 4663371000006113  
21 3647021000006114  
22 8325571000006119  
23 3023071000006110  
24 3532181014  
25 5096211000006116  
26 4661781000006114  
27 7104121000006117  
28 739931000006118  
29 270617017  
30 270770018  
31 270776012  
32 270778013  
33 1834341000006111  
34 861571000006118  
35 366671000000118  
36 282927013  
37 354615015  
38 354618018  
39 354619014  
40 7212381000006113  
41 8293011000006118  
42 8321121000006114  
43 7986531000006116  
44 5087201000006117  
45 270769019  
46 4542541000006117  
47 251924010  
48 4542681000006110  
49 251930010  
50 251923016  
51 4542521000006112  
52  
53  
54  
55  
56  
57  
58  
59  
60

For peer review only

1  
2 251929017  
3 4542661000006117  
4  
5  
6  
7  
8  
9  
10  
11  
12  
13  
14  
15  
16  
17  
18  
19  
20  
21  
22  
23  
24  
25  
26  
27  
28  
29  
30  
31  
32  
33  
34  
35  
36  
37  
38  
39  
40  
41  
42  
43  
44  
45  
46  
47  
48  
49  
50  
51  
52  
53  
54  
55  
56  
57  
58  
59  
60

For peer review only

1  
2 Term  
3 Transplantation of pancreas  
4 Renal transplant  
5 Replacement of previous liver transplant  
6 Renewal of transplanted pancreatic tissue  
7 Cadaveric renal transplant  
8 Exploration of renal transplant  
9 Kidney transplant failure and rejection  
10 Heart transplant failure and rejection  
11 Heart-lung transplant failure and rejection  
12 Single lung transplant  
13 Double lung transplant  
14 Renal transplant rejection  
15 Very mild acute rejection of renal transplant  
16 Acute rejection of renal transplant - grade I  
17 Chronic transplant nephropathy  
18 Acute-on-chronic rejection of renal transplant  
19 Unexplained episode of renal transplant dysfunction  
20 Transplantation of islets of Langerhans  
21 Transplant biopsy  
22 Pancreas transplant  
23 Renal transplant rejected  
24 Post-transplant bronchiolitis obliterans syndrome  
25 Lung transplant evaluation  
26 Urological complication of renal transplant  
27 Vascular complication of renal transplant  
28 Rupture of artery of transplanted kidney  
29 Paediatric transplantation surgery  
30 Transplantation of heart and lung NOS  
31 Other specified other transplantation of heart  
32 Other specified transplantation of kidney  
33 Transplantation of kidney NOS  
34 Orthotopic transplantation of liver  
35 Renal transplant with complication  
36 Piggy back liver transplant  
37 Interventions associated with transplantation of kidney NOS  
38 Allotransplantation of kidney from cadaver  
39 Excision of rejected transplanted kidney  
40 Corneal transplant  
41 Renal transplant rejected  
42 [V]Pancreas transplanted  
43 Transplanted liver present  
44 Tx - Kidney transplantation  
45 SLTx - Single lung transplant  
46 Mild chronic transplant nephropathy  
47 History of renal transplant  
48 Liver transplant recipient  
49 Whole organ pancreatic transplant  
50 Hepatic transplantation  
51 PTLN - Post-transplant lymphoproliferative disorder

1 Exploration of kidney transplant  
2 Kidney transplant  
3 [V]Liver transplanted  
4 History of organ transplant  
5 History of being lung transplant recipient  
6 Heart transplant  
7 Allotransplantation of kidney with DBD (donation after brain stem death)  
8 Renal autotransplantation or reimplantation of kidney  
9 LTx - Liver transplant  
10 Tx - Renal transplantation  
11 Xenotransplant of heart  
12 Transplant of lung  
13 Islet cell transplant  
14 Autotransplant kidney  
15 Disorder affecting transplant  
16 DLTx - Double lung transplant  
17 Tx - Liver transplantation  
18 Piggy-back liver transplant  
19 Allotransplant of heart and lung  
20 Heart transplant  
21 Structure of transplanted liver  
22 Anaesthesia for corneal transplant  
23 MR angiography of transplanted kidney  
24 Magnetic resonance angiography of transplanted kidney  
25 Monomorphic posttransplant lymphoproliferative disorder  
26 Immunosuppressive therapy for transplant  
27 Awaiting transplantation of lung  
28 Radionuclide imaging of transplanted kidney  
29 Renal homotransplantation excluding donor and recipient nephrectomy  
30 Renal transplant venogram  
31 Infectious mononucleosis-like post-transplant lymphoproliferative disorder  
32 Aftercare for liver transplant done  
33 Emergency hospital admission to cardiothoracic transplantation surgery service  
34 [V]Kidney transplanted  
35 Structure of transplanted kidney  
36 Ultrasound scan of transplant liver  
37 Failed renal transplant  
38 Specimen from transplanted lung obtained by excision  
39 Rejection of pancreas transplant  
40 Percutaneous transhepatic transplantation of pancreatic islet cell using fluoroscopic guidance  
41 Transplantation of kidney and pancreas  
42 Transplanted cornea  
43 Liver transplant rejection  
44 Entire transplanted pancreatic islets  
45 Cardiac transplant disorder  
46 Fluoroscopic venography of transplanted pancreas using contrast  
47 Anaesthesia for heart/lung transplant  
48 Anesthesia for heart/lung transplant  
49 Retrograde insertion of ureteric stent into ureter of transplanted kidney using fluoroscopic guidance  
50 Double lung transplant en bloc

1 Lung transplant rejection  
2 Post transplant lymphoproliferative disorder  
3 Bronchiolitis obliterans syndrome due to and after lung transplantation  
4 Transplant renal artery stenosis  
5 Disorder of heart muscle associated with rejection of cardiac transplant  
6 Laparoscopic biopsy of transplanted pancreas  
7 Doppler ultrasonography (US) of transplanted kidney  
8 Liver transplant recipient  
9 History of heart-lung transplant recipient  
10 Entire transplanted islets of Langerhans  
11 Emergency hospital admission to transplantation surgery service  
12 Disorder of transplanted heart  
13 Structure of renal artery of transplanted kidney  
14 Double lung transplant as a block  
15 Renal transplant venogram  
16 Transplanted heart-lung present  
17 BSSLTx - Bilateral sequential single lung transplant  
18 Chronic rejection of liver transplant  
19 Reactive plasmacytic hyperplasia post-transplant lymphoproliferative disorder  
20 Lung transplant recipient  
21 Transplanted lung resection sample  
22 Anesthesia for renal transplant  
23 Heterotransplant of pancreas  
24 Anesthesia for corneal transplant  
25 Discharge from transplant surgery service  
26 Revision of transplantation of heart  
27 Renal transplant angiogram  
28 History of pancreas transplant  
29 Allotransplantation of lobe of lung from live donor  
30 Transplanted kidney present  
31 Complication of transplanted liver  
32 Homotransplant of pancreas  
33 Anaesthesia for heart transplant  
34 Primary non-function of renal transplant  
35 Kidney transplant recipient  
36 History of transplantation of pancreas  
37 Early post-transplant lymphoproliferative disorder  
38 Cornea transplant recipient  
39 Liver transplant without recipient hepatectomy  
40 Fluoroscopic venography of renal transplant  
41 Hyperacute rejection of pancreas transplant  
42 Fluoroscopic angiography of transplanted liver  
43 [V]Lung transplanted  
44 Renal transplant recipient  
45 Fluoroscopy guided retrograde insertion of stent into ureter of transplanted kidney  
46 Cardiothoracic transplantation care plan  
47 Liver transplant failure  
48 Cardiac transplant failure  
49 Perfusion injury of renal transplant  
50 Disorder related to renal transplantation



1 Accelerated rejection of pancreas transplant  
2 Transplanted lung  
3 Bilateral sequential single lung transplant  
4 Hyperacute rejection of renal transplant  
5 Transplanted lung present  
6 Emergency hospital admission to paediatric transplantation surgery service  
7 Fluoroscopy guided removal of nephrostomy tube from transplanted kidney  
8 Acute rejection of lung transplant  
9 Heart transplant recipient  
10 Kidney transplant evaluation  
11 Entire transplanted lung  
12 Cardiac transplant rejection  
13 Doppler ultrasound scan of transplanted kidney  
14 Structure of transplanted islets of Langerhans  
15 Living donor liver transplantation  
16 Disorder related to lung transplantation  
17 Chronic rejection of cardiac transplant  
18 Structure of transplanted cornea  
19 Transplanted kidney  
20 LTx - Lung transplant  
21 Allotransplantation of kidney from non-beating heart cadaver  
22 Transplanted cornea present  
23 Transplant present  
24 Percutaneous needle biopsy of transplanted pancreas  
25 Heart-lung transplant recipient  
26 Spinal cord transplantation  
27 CT of transplanted liver  
28 Cardiovascular system transplantation  
29 Ultrasound guided biopsy of transplanted liver  
30 Anaesthesia for renal transplant  
31 US scan of transplant pancreas  
32 Structure of transplanted lung  
33 Allotransplantation of right kidney  
34 Allogeneic transplantation of pancreatic islet cells  
35 Transplanted heart  
36 Disorder of myocardium associated with rejection of cardiac transplant  
37 Pretransplant evaluation of liver recipient  
38 Autotransplantation of heart  
39 Anesthesia for liver transplant  
40 Entire transplanted heart  
41 Chronic kidney disease stage 5 with transplant  
42 Acute rejection of pancreas transplant  
43 Complication of transplanted heart  
44 Ultrasound scan of transplant pancreas  
45 Structure of transplanted heart  
46 Heart transplant biopsy  
47 Post transplant lymphoproliferative disorder  
48 Arteriosclerosis of coronary artery bypass graft of transplanted heart  
49 Cardiothoracic transplantation service  
50 Fluoroscopy guided percutaneous transjugular biopsy of transplanted liver

1  
2 Disorder of transplanted kidney  
3 [V]Heart and lungs transplant status  
4 Auxiliary heart transplant  
5 Orthotopic transplantation of liver  
6 Transplantation of kidney regime  
7 [V]Heart transplanted  
8 Kidney transplant with complication  
9 [V]Transplanted organ or tissue  
10 [V]Transplanted organ  
11 [X]Failure & rejection of other transplanted organ & tissue  
12 Organ transplant with complication  
13 Transplantation of liver NOS  
14 Transplantation of pancreas NOS  
15 Cardiothoracic transplantation  
16 Transplantation surgery  
17 Orthotopic transplantation of whole liver  
18 Chronic rejection of renal transplant - grade 1  
19 Chronic rejection of renal transplant - grade III  
20 Excision of rejected transplanted kidney  
21 Transplanted organ rejection  
22 Transplantation of tail of pancreas  
23 Transplantation of kidney  
24 Doppler ultrasound of transplanted kidney  
25 Ultrasound guided insertion of nephrostomy tube into transplanted kidney  
26 Doppler ultrasound of transplanted liver  
27 Structure of transplanted pancreas  
28 Ultrasound scan of transplant kidney  
29 Transplant renal vein thrombosis  
30 Hyperacute rejection of liver transplant  
31 Specimen from transplanted kidney obtained by biopsy  
32 Hyperacute rejection of lung transplant  
33 Chronic rejection of pancreas transplant  
34 Doppler ultrasonography of blood vessel of organ transplant  
35 Accelerated coronary artery disease in transplanted heart  
36 [V]Liver transplanted  
37 Examination of recipient after kidney transplant  
38 Heterotopic liver transplant  
39 Fluoroscopic angiography of renal transplant  
40 Fluoroscopy guided insertion of nephrostomy tube into transplanted kidney  
41 Recurrent post-transplant renal disease  
42 Removal of nephrostomy tube from transplanted kidney using fluoroscopic guidance  
43 Solid organ transplant  
44 End stage renal failure with renal transplant  
45 Doppler ultrasonography of transplanted kidney  
46 Radioisotope hepatobiliary function study with stimulation post transplant  
47 Fluoroscopic venogram of transplanted pancreas using contrast  
48 Post-transplant neoplasia  
49 Transplanted heart present  
50 Corneal transplant  
51 Moderate chronic transplant nephropathy

1 Transplantation of islet cells  
2 Piggy-back heart transplant  
3 Heart-lung transplant with recipient cardiectomy-pneumonectomy  
4 Heart and lung transplant  
5 Removal of transplanted kidney  
6 [V]Lung transplanted  
7 Organ transplant with complication  
8 Other specified transplantation of lung  
9 Transplantation of lung NOS  
10 Other specified transplantation of heart and lung  
11 Aneurysm of vein of transplanted kidney  
12 Thrombosis of vein of transplanted kidney  
13 Antegrade insertion of ureteric stent into ureter of transplanted kidney using fluoroscopic guidance  
14 Accelerated rejection of renal transplant  
15 Excision of transplanted pancreas  
16 Transplantation of liver  
17 Transplantation surgery  
18 Transplanted organ failure  
19 Normal renal function of transplanted kidney  
20 Anaesthesia for liver transplant  
21 US scan of transplant kidney  
22 US doppler scan of transplanted kidney  
23 Bronchus transplantation  
24 Post-transplant lymphoproliferative disorder  
25 Doppler ultrasound scan of transplanted liver  
26 Transplantation of single lobe of lung  
27 Transplanted liver present  
28 Polymorphic lymphoproliferative disorder following transplant  
29 Transplanted organ  
30 MRI angiogram of transplanted liver  
31 Fluoroscopy and angioplasty of renal transplant  
32 Pleura transplantation  
33 Entire transplanted cornea  
34 Accelerated rejection of liver transplant  
35 Post-lung transplantation bronchiectasis  
36 Heart transplant recipient  
37 Doppler ultrasonography of transplanted liver  
38 Doppler ultrasound of transplant liver  
39 Fluoroscopy guided antegrade insertion of stent into ureter of transplanted kidney  
40 Hyperacute rejection of cardiac transplant  
41 Vesicoureteric reflux after renal transplant  
42 Ultrasonography guided biopsy of transplanted kidney  
43 Renal artery stenosis of transplanted kidney  
44 Part organ pancreatic transplant  
45 Post transplant lymphoproliferative disorder  
46 Orthotopic liver transplant  
47 Autotransplantation of kidney  
48 Live donor renal allotransplant  
49 Hypertension associated with transplantation  
50 Fluoroscopic angioplasty of renal transplant

1 Renal autotransplantation  
2 Corneal transplant  
3 CTx - Cardiac transplant  
4 [X]Renal tubulo-interstitial disorders/transplant rejection  
5 Autotransplant of kidney  
6 Auxillary liver transplant  
7 OS interventions associated with transplantation of kidney  
8 Transplanted organ complication NOS  
9 Xenotransplantation of heart  
10 Transplantation of kidney from cadaver  
11 Other specified transplantation of liver  
12 Aneurysm of artery of transplanted kidney  
13 Thrombosis of artery of transplanted kidney  
14 [RFC] Renal transplant  
15 Allotransplantation of kidney from live donor  
16 Acute rejection of renal transplant - grade II  
17 Ultrasonography of transplanted kidney with contrast  
18 Transplanted liver  
19 Transplant glomerulopathy  
20 Acute rejection of cardiac transplant  
21 Chronic rejection of lung transplant  
22 Autologous transplantation of pancreatic islet cells  
23 Radionuclide study of transplanted kidney  
24 Laparoscopic biopsy of transplanted kidney  
25 Entire transplant kidney  
26 Renal tubulo-interstitial disorders in transplant rejection  
27 Entire transplanted pancreas  
28 Lung transplant biopsy sample  
29 Ultrasonography guided biopsy of transplanted liver  
30 CT guided biopsy of transplanted liver  
31 Transplant glomerulopathy - early form  
32 Complication of transplanted kidney  
33 Fluoroscopic angiogram of transplanted liver  
34 Fluoroscopy guided removal of nephrostomy tube from transplanted kidney  
35 Entire transplanted liver  
36 [V]Heart transplanted  
37 Entire transplanted kidney  
38 Fluoroscopy guided percutaneous transhepatic transplantation of pancreatic islet cell  
39 History of renal transplant  
40 Eye structure transplantation  
41 Live donor renal transplant  
42 Allotransplantation of kidney from beating heart cadaver  
43 Percutaneous thrombolysis of vein of transplanted pancreas using fluoroscopic guidance  
44 Accelerated rejection of lung transplant  
45 Tissue specimen from transplanted kidney  
46 Other transplantation of heart  
47 History of lung transplant  
48 Kidney transplantation  
49 Cadaveric heart transplant  
50 Heterotopic allotransplant of heart

1 Allotransplant of heart  
2 Cadaver renal allotransplant  
3 Bronchiolitis obliterans syndrome after lung transplantation  
4 HtTx - Heart transplant  
5 Allotransplantation of kidney with DCD (donation after cardiac death)  
6 Heart transplantation  
7 Post-transplantation of kidney examination of recipient  
8 Allotransplantation of heart and lung  
9 Heart transplant with complication  
10 Orthotopic transplantation of liver NEC  
11 Transplantation of heart and lung  
12 Rupture of vein of transplanted kidney  
13 Stenosis of vein of transplanted kidney  
14 Post-transplant bronchiolitis obliterans syndrome  
15 Complication of transplanted lung  
16 Liver transplant  
17 Piggyback transplantation of heart  
18 Cardiothoracic transplantation  
19 Complication of transplanted lung  
20 Transplantation of pancreas and duodenum  
21 Transplantation of whole pancreas  
22 Revision of transplantation of heart and lung  
23 Transplant rejection  
24 Liver transplant failure and rejection  
25 Xenograft renal transplant  
26 Chronic rejection of renal transplant - grade II  
27 De novo transplant disease  
28 Complication of transplanted pancreas  
29 Transplantation of adrenal gland  
30 Hypertension secondary to kidney transplant  
31 Allotransplantation of left kidney  
32 Transluminal right ventricular biopsy after heart transplant  
33 Accelerated rejection of cardiac transplant  
34 Fluoroscopy guided antegrade insertion of ureteric stent into ureter of transplanted kidney  
35 [V]Cornea transplanted  
36 [V]Transplanted organ or tissue  
37 Liver transplant with recipient hepatectomy  
38 Anesthesia for heart transplant  
39 Biopsy of transplanted kidney using ultrasound guidance  
40 History of islet cell transplant  
41 Pre-existing disease in renal transplant  
42 Autotransplant of lung  
43 Structure of transplanted pancreatic islets  
44 CT of transplanted liver with contrast  
45 Total pancreatectomy with transplantation  
46 Magnetic resonance angiography of transplanted liver  
47 Specimen from transplanted lung obtained by biopsy  
48 Heart-lung transplant recipient  
49 Transplant of kidney using robotic assistance  
50 MRI of transplanted liver

1 US scan of transplant liver  
2 Heart transplant with recipient cardiectomy  
3 [V]Transplanted organ  
4 Ultrasound scan of transplanted kidney with contrast  
5 Acute rejection of liver transplant  
6 Allotransplantation of islets of Langerhans  
7 Fluoroscopy guided retrograde insertion of ureteric stent into ureter of transplanted kidney  
8 Disorder related to cardiac transplantation  
9 Orthotopic allotransplant of heart  
10 Renal transplant arteriogram  
11 Post-renal transplant vesicoureteric reflux  
12 Entire renal artery of transplanted kidney  
13 Renal homotransplantation with unilateral recipient nephrectomy  
14 [X]Surgical operation with transplant of whole organ as the cause of abnormal reaction of the patient  
15 Transplanted organ complication  
16 Allotransplantation of kidney from cadaver NEC  
17 HTx - Heart transplant  
18 Pancreatic transplant  
19 Transplanted pancreas pancreatectomy  
20 Transplant of kidney  
21 Fluoroscopic angioplasty of transplanted liver  
22 HLTx - Heart lung transplant  
23 Cornea transplant recipient  
24 Severe chronic transplant nephropathy  
25 Auxiliary liver transplant  
26 Disorder affecting transplanted structure  
27 Liver transplant with complication  
28 Other specified transplantation of pancreas  
29 Allotransplantation of heart NEC  
30 Revision of transplantation of heart NEC  
31 Other transplantation of heart NOS  
32 Under regular review by lung transplant unit  
33 Lung transplant  
34 Interventions associated with transplantation of kidney  
35 Transplant immunosuppression  
36 Acute rejection of renal transplant  
37 Acute rejection of renal transplant - grade III  
38 Chronic rejection of renal transplant  
39 Renal transplant biopsy sample  
40 Live donor liver transplant  
41 Ultrasonography guided insertion of nephrostomy tube into transplanted kidney  
42 Coronary arteriosclerosis in native artery of transplanted heart  
43 Liver transplant disorder  
44 Transplantation of heart  
45 History of heart recipient  
46 H/O: heart recipient  
47 History of - lung recipient  
48 H/O: lung recipient  
49 H/O: kidney recipient  
50 History of - kidney recipient

1  
2 H/O: liver recipient  
3 History of liver recipient  
4  
5  
6  
7  
8  
9  
10  
11  
12  
13  
14  
15  
16  
17  
18  
19  
20  
21  
22  
23  
24  
25  
26  
27  
28  
29  
30  
31  
32  
33  
34  
35  
36  
37  
38  
39  
40  
41  
42  
43  
44  
45  
46  
47  
48  
49  
50  
51  
52  
53  
54  
55  
56  
57  
58  
59  
60

For peer review only

|    | ICD-10 code | Term                                              |
|----|-------------|---------------------------------------------------|
| 1  |             |                                                   |
| 2  |             |                                                   |
| 3  | Z94.0       | Kidney transplant status                          |
| 4  | Z94.1       | Heart transplant status                           |
| 5  | Z94.2       | Lung transplant status                            |
| 6  |             |                                                   |
| 7  | Z94.3       | Heart and lungs transplant status                 |
| 8  | Z94.4       | Liver transplant status                           |
| 9  | Z94.6       | Bone transplant status                            |
| 10 | Z94.7       | Corneal transplant status                         |
| 11 | Z94.9       | Transplanted organ and tissue status, unspecified |
| 12 |             |                                                   |
| 13 | Z94.82      | Intestine transplant status                       |
| 14 | Z94.83      | Pancreas transplant status                        |
| 15 | Z94.89      | Other transplanted organ and tissue status        |
| 16 |             |                                                   |
| 17 |             |                                                   |
| 18 |             |                                                   |
| 19 |             |                                                   |
| 20 |             |                                                   |
| 21 |             |                                                   |
| 22 |             |                                                   |
| 23 |             |                                                   |
| 24 |             |                                                   |
| 25 |             |                                                   |
| 26 |             |                                                   |
| 27 |             |                                                   |
| 28 |             |                                                   |
| 29 |             |                                                   |
| 30 |             |                                                   |
| 31 |             |                                                   |
| 32 |             |                                                   |
| 33 |             |                                                   |
| 34 |             |                                                   |
| 35 |             |                                                   |
| 36 |             |                                                   |
| 37 |             |                                                   |
| 38 |             |                                                   |
| 39 |             |                                                   |
| 40 |             |                                                   |
| 41 |             |                                                   |
| 42 |             |                                                   |
| 43 |             |                                                   |
| 44 |             |                                                   |
| 45 |             |                                                   |
| 46 |             |                                                   |
| 47 |             |                                                   |
| 48 |             |                                                   |
| 49 |             |                                                   |
| 50 |             |                                                   |
| 51 |             |                                                   |
| 52 |             |                                                   |
| 53 |             |                                                   |
| 54 |             |                                                   |
| 55 |             |                                                   |
| 56 |             |                                                   |
| 57 |             |                                                   |
| 58 |             |                                                   |
| 59 |             |                                                   |
| 60 |             |                                                   |

For peer review only



|    | OPCS code | Term                              |
|----|-----------|-----------------------------------|
| 1  |           |                                   |
| 2  |           |                                   |
| 3  | B17       | Transplantation of thymus gland   |
| 4  | B17.1     | Transplantation of thymus gland   |
| 5  | B17.8     | Transplantation of thymus gland   |
| 6  |           |                                   |
| 7  | B17.9     | Transplantation of thymus gland   |
| 8  | E53       | Transplantation of lung           |
| 9  | E53.1     | Transplantation of lung           |
| 10 | E53.2     | Transplantation of lung           |
| 11 | E53.3     | Transplantation of lung           |
| 12 |           |                                   |
| 13 | E53.8     | Transplantation of lung           |
| 14 | E53.9     | Transplantation of lung           |
| 15 | G26       | Transplantation of stomach        |
| 16 | G26.1     | Transplantation of stomach        |
| 17 | G26.8     | Transplantation of stomach        |
| 18 |           |                                   |
| 19 | G26.9     | Transplantation of stomach        |
| 20 | G68       | Transplantation of ileum          |
| 21 | G68.1     | Transplantation of ileum          |
| 22 | G68.8     | Transplantation of ileum          |
| 23 | G68.9     | Transplantation of ileum          |
| 24 |           |                                   |
| 25 | J01       | Transplantation of liver          |
| 26 | J01.1     | Transplantation of liver          |
| 27 | J01.2     | Transplantation of liver          |
| 28 | J01.3     | Transplantation of liver          |
| 29 | J01.4     | Transplantation of liver          |
| 30 | J01.5     | Transplantation of liver          |
| 31 | J01.8     | Transplantation of liver          |
| 32 | J01.9     | Transplantation of liver          |
| 33 |           |                                   |
| 34 | J54       | Transplantation of pancreas       |
| 35 | J54.1     | Transplantation of pancreas       |
| 36 | J54.2     | Transplantation of pancreas       |
| 37 | J54.3     | Transplantation of pancreas       |
| 38 | J54.4     | Transplantation of pancreas       |
| 39 | J54.5     | Transplantation of pancreas       |
| 40 | J54.8     | Transplantation of pancreas       |
| 41 | J54.9     | Transplantation of pancreas       |
| 42 |           |                                   |
| 43 | J55.3     | Total excision of pancreas        |
| 44 |           |                                   |
| 45 | J72.1     | Other operations on spleen        |
| 46 | K01       | Transplantation of heart and lung |
| 47 | K01.1     | Transplantation of heart and lung |
| 48 | K01.2     | Transplantation of heart and lung |
| 49 | K01.8     | Transplantation of heart and lung |
| 50 | K01.9     | Transplantation of heart and lung |
| 51 |           |                                   |
| 52 | K02       | Other transplantation of heart    |
| 53 | K02.1     | Other transplantation of heart    |
| 54 | K02.2     | Other transplantation of heart    |
| 55 | K02.3     | Other transplantation of heart    |
| 56 | K02.4     | Other transplantation of heart    |
| 57 | K02.5     | Other transplantation of heart    |
| 58 | K02.6     | Other transplantation of heart    |
| 59 | K02.8     | Other transplantation of heart    |
| 60 |           |                                   |

|    |       |                                                         |
|----|-------|---------------------------------------------------------|
| 1  |       |                                                         |
| 2  | K02.9 | Other transplantation of heart                          |
| 3  | M01   | Transplantation of kidney                               |
| 4  | M01.1 | Transplantation of kidney                               |
| 5  | M01.2 | Transplantation of kidney                               |
| 6  | M01.3 | Transplantation of kidney                               |
| 7  | M01.4 | Transplantation of kidney                               |
| 8  | M01.5 | Transplantation of kidney                               |
| 9  | M01.8 | Transplantation of kidney                               |
| 10 | M01.9 | Transplantation of kidney                               |
| 11 | M02.6 | Total excision of kidney                                |
| 12 | M02.7 | Total excision of kidney                                |
| 13 | M08.4 | Other open operations on kidney                         |
| 14 | M17   | Interventions associated with transplantation of kidney |
| 15 | M17.4 | Interventions associated with transplantation of kidney |
| 16 | M17.8 | Interventions associated with transplantation of kidney |
| 17 | M17.9 | Interventions associated with transplantation of kidney |
| 18 |       |                                                         |
| 19 |       |                                                         |
| 20 |       |                                                         |
| 21 |       |                                                         |
| 22 |       |                                                         |
| 23 |       |                                                         |
| 24 |       |                                                         |
| 25 |       |                                                         |
| 26 |       |                                                         |
| 27 |       |                                                         |
| 28 |       |                                                         |
| 29 |       |                                                         |
| 30 |       |                                                         |
| 31 |       |                                                         |
| 32 |       |                                                         |
| 33 |       |                                                         |
| 34 |       |                                                         |
| 35 |       |                                                         |
| 36 |       |                                                         |
| 37 |       |                                                         |
| 38 |       |                                                         |
| 39 |       |                                                         |
| 40 |       |                                                         |
| 41 |       |                                                         |
| 42 |       |                                                         |
| 43 |       |                                                         |
| 44 |       |                                                         |
| 45 |       |                                                         |
| 46 |       |                                                         |
| 47 |       |                                                         |
| 48 |       |                                                         |
| 49 |       |                                                         |
| 50 |       |                                                         |
| 51 |       |                                                         |
| 52 |       |                                                         |
| 53 |       |                                                         |
| 54 |       |                                                         |
| 55 |       |                                                         |
| 56 |       |                                                         |
| 57 |       |                                                         |
| 58 |       |                                                         |
| 59 |       |                                                         |
| 60 |       |                                                         |

1  
2 Medcodeid  
3 40879015  
4 52728016  
5 287930013  
6 293742013  
7 296819018  
8 297440017  
9 297566017  
10 297643013  
11 303525019  
12 311616019  
13 312642016  
14 454209012  
15 477671011  
16 1223250017  
17 1231546012  
18 1232607019  
19 1494958019  
20 161591000006114  
21 3097031000006111  
22 3097041000006118  
23 3408911000006111  
24 3408931000006117  
25 3553221000006116  
26 3678391000006114  
27 3726191000006118  
28 4767881000006118  
29 4770621000006110  
30 4770931000006119  
31 4777241000006117  
32 5004751000006119  
33 5055171000006117  
34 5055491000006112  
35 5055541000006119  
36 5055561000006115  
37 5065841000006111  
38 5124931000006111  
39 6220621000006114  
40 6635151000006116  
41 6874111000006114  
42 300584016  
43 312576015  
44 359513016  
45 2534171012  
46 5011771000006111  
47 5141661000006114  
48 6635261000006114  
49 13938311000006118  
50 7278014  
51 32869011

For peer review only

1  
2 55627011  
3 55628018  
4 59922014  
5 308730016  
6 309400018  
7 309749012  
8 309760015  
9 309761016  
10 309764012  
11 309766014  
12 309771019  
13 309773016  
14 309775011  
15 309776012  
16 309777015  
17 309778013  
18 309783017  
19 309969012  
20 310034013  
21 310148010  
22 310149019  
23 310150019  
24 310151015  
25 310152010  
26 310153017  
27 310154011  
28 310155012  
29 310156013  
30 310157016  
31 310159018  
32 310181011  
33 310182016  
34 310183014  
35 310184015  
36 310185019  
37 310186018  
38 310187010  
39 310188017  
40 310189013  
41 310190016  
42 310191017  
43 310192012  
44 310197018  
45 310205010  
46 310216015  
47 310217012  
48 310944013  
49 311035015  
50 311036019  
51 312521010

For peer review only

1  
2 312523013  
3 312528016  
4 312529012  
5 312535012  
6 312536013  
7 312549015  
8 312552011  
9 312553018  
10 359167017  
11 359168010  
12 359169019  
13 359170018  
14 359171019  
15 359172014  
16 359310019  
17 359321011  
18 400192018  
19 400194017  
20 400195016  
21 400196015  
22 400197012  
23 400198019  
24 1209790019  
25 140551000006117  
26 221661000006114  
27 221671000006119  
28 394571000006116  
29 405421000000118  
30 492101000006119  
31 492131000006110  
32 492141000006117  
33 492171000006113  
34 492191000006114  
35 492201000006112  
36 492221000006119  
37 492231000006116  
38 492251000006111  
39 492281000006115  
40 492541000006111  
41 492731000006111  
42 493021000006115  
43 815501000006110  
44 905291000006113  
45 909461000006119  
46 909631000006114  
47 2558271000006115  
48 3994461000006114  
49 4515241000006118  
50 4515251000006116  
51 4515261000006119

For peer review only

1  
2 4805761000006111  
3 5139361000006116  
4 5139451000006113  
5 5139461000006110  
6 5139581000006118  
7  
8 5560451000006117  
9 6348841000006111  
10 6899881000006115  
11 6905901000006110  
12  
13 7084091000006114  
14 8448331000006113  
15 8448361000006116  
16 8448381000006114  
17 8448401000006114  
18 8448461000006110  
19 8448481000006117  
20 8448551000006114  
21 8448591000006115  
22 8448621000006118  
23 8448631000006115  
24 8448661000006112  
25 8448671000006117  
26 8448741000006119  
27 8448761000006115  
28 8448801000006112  
29 8448821000006119  
30 8448851000006111  
31 8448861000006113  
32 8448891000006117  
33 8448941000006116  
34 9310141000006117  
35 9478071000006110  
36 9478081000006113  
37 9874721000006113  
38 9874751000006116  
39 9917831000006113  
40 9917841000006115  
41 12717341000006112  
42 41398015  
43 297177019  
44 297179016  
45 297180018  
46 297181019  
47 2674605012  
48 2692565012  
49 299241000000110  
50 300141000000119  
51 315671000000110  
52 641211000000118  
53 641301000000114  
54  
55  
56  
57  
58  
59  
60

For peer review only

1  
2 695191000006119  
3 699671000000115  
4 699731000000110  
5 699791000000111  
6 699911000000117  
7  
8 905781000006118  
9 908811000006112  
10 979461000006111  
11 983261000006119  
12 983291000006110  
13 983301000006111  
14 983311000006114  
15  
16 1148911000000119  
17 1674121000000119  
18 1674381000000115  
19 1674661000000118  
20 1674971000000118  
21 1675051000000110  
22 1679791000006113  
23 1682241000006111  
24 1747821000006117  
25 1747831000006119  
26 1747851000006114  
27 1747861000006111  
28 1757431000000113  
29 1855101000006113  
30 1858501000006114  
31 1863341000006118  
32 2262931000000117  
33 2894411000006110  
34 4769281000006110  
35 5006891000006112  
36 5006901000006111  
37 5006911000006114  
38 5006921000006118  
39 5092791000006115  
40 5552111000006118  
41 7045281000006112  
42 7058051000006116  
43 7092351000006112  
44 7510741000006111  
45 7567771000006118  
46 7861151000006116  
47 854741000006113  
48  
49 G35  
50 7821651000006119  
51 7821661000006117  
52 2159899016  
53 7821671000006112  
54  
55 2812521000006111

For peer review only

1  
2 303404016  
3 302322010  
4 309744019  
5 886291000006112  
6 303761010  
7 1222351011  
8 3047391000006119  
9 2621151000006116  
10 3414711000006118  
11 3420891000006119  
12 4785581000006112  
13 3113551000006113  
14 3316751000006117  
15 3316811000006110  
16 3316801000006112  
17 2559781000006115  
18 7837051000006115  
19 5083981000006114  
20 5083991000006112  
21 6582871000006114  
22 6664421000006111  
23 8463851000006112  
24 6582861000006119  
25 6664411000006115  
26 8464011000006119  
27 7954661000006112  
28 8463781000006114  
29 8463801000006113  
30 6664471000006112  
31 3497991000006117  
32 5082831000006111  
33 8463711000006119  
34 8463661000006113  
35 5082801000006115  
36 8463731000006113  
37 6664481000006110  
38 6664431000006114  
39 7877161000006117  
40 8463831000006117  
41 8463681000006115  
42 8464001000006117  
43 8463791000006112  
44 8463951000006115  
45 6839131000006116  
46 8463861000006114  
47 3648651000006113  
48 7988841000006110  
49 6632031000006117  
50 3984691000006116  
51 179501000006113

For peer review only



1  
2 601091000006115  
3 7060761000006112  
4 7988851000006112  
5 3984671000006117  
6 5083971000006111  
7 6839121000006119  
8 5085631000006115  
9 3648641000006111  
10 3113541000006111  
11 56765016  
12 3668461000006119  
13 8463641000006114  
14 8463771000006111  
15 6664491000006113  
16 601031000006119  
17 6797991000006117  
18 6798001000006110  
19 6582851000006116  
20 3497981000006115  
21 3047411000006119  
22 4784111000006112  
23 2532958014  
24 8463631000006116  
25 8463821000006115  
26 8463891000006118  
27 302940016  
28 5082841000006118  
29 7877171000006112  
30 8463701000006117  
31 5082821000006113  
32 5082851000006116  
33 6664391000006115  
34 5085621000006118  
35 8463761000006116  
36 2559801000006116  
37 6853111000006114  
38 3414681000006119  
39 2621161000006119  
40 3420881000006117  
41 906051000006118  
42 2532950019  
43 8463911000006116  
44 5082811000006117  
45 6664441000006116  
46 7988831000006117  
47 302941017  
48 6664451000006119  
49 8463811000006111  
50 6664401000006118  
51 396357012

For peer review only

1  
2 8463881000006116  
3 7060771000006117  
4 2559821000006114  
5 4808981000006112  
6 3414701000006116  
7  
8 3527134013  
9 3984681000006119  
10 8463921000006112  
11 7821461000006119  
12 6632021000006115  
13 7959171000006110  
14 6582841000006118  
15 5073581000006111  
16 3668441000006118  
17 3668451000006116  
18 6664461000006117  
19 8463981000006111  
20 6853131000006115  
21 4784091000006115  
22 3047421000006110  
23 302939018  
24 302937016  
25 302947018  
26 179521000006115  
27 2559791000006117  
28 3047431000006113  
29 488238014  
30 497569010  
31 1495442018  
32 3047371000006115  
33 3420851000006113  
34 179571000006119  
35 3047381000006117  
36 56770011  
37 2713501000006112  
38 302953018  
39 302946010  
40 3316791000006111  
41 3316771000006110  
42 292553010  
43 459292011  
44 1780311019  
45 2288041000000110  
46 72711000006117  
47 84291000006117  
48 84371000006110  
49 84421000006115  
50 84451000006112  
51 2967831017  
52 84411000006111

For peer review only

1 913931000006116  
2 12332281000006119  
3 8022441000006118  
4 6961081000006118  
5 6970621000006114  
6 12331231000006110  
7 12363721000006110  
8 4757991000006116  
9 6050081000006114  
10 6980001000006117  
11 12704951000006115  
12 84361000006115  
13 913541000006118  
14 84321000006114  
15 913781000006117  
16 84401000006113  
17 12331221000006112  
18 12332271000006117  
19 8027491000006113  
20 8024761000006118  
21 12085801000006113  
22 12345471000006114  
23 8022601000006118  
24 12370631000006117  
25 8025181000006114  
26 8040341000006111  
27 8037821000006110  
28 8022431000006111  
29 8022551000006115  
30 8032761000006111  
31 8050091000006115  
32 8022561000006118  
33 8006221000006115  
34 8037831000006113  
35 7969211000006115  
36 12102641000006114  
37 8022401000006115  
38 8027471000006112  
39 12363211000006112  
40 8032741000006112  
41 7287641000006112  
42 8024771000006113  
43 8019531000006110  
44 7696791000006110  
45 3526507010  
46 6967091000006111  
47 8034431000006118  
48 8043591000006119  
49 8027411000006115  
50 12370731000006114

For peer review only

1  
2 8026051000006110  
3 12370711000006115  
4 12370871000006115  
5 8026071000006117  
6 8034841000006114  
7 8120371000006113  
8 6971871000006117  
9 7098241000006117  
10 8027391000006115  
11 12085811000006111  
12 8232111000006119  
13 12370791000006113  
14 84731000006111  
15 913841000006116  
16 928501000006119  
17 616621000006115  
18 913941000006114  
19 84721000006113  
20 913521000006113  
21 913661000006118  
22 84771000006114  
23 7098211000006116  
24 12370361000006118  
25 12363201000006114  
26 7966541000006112  
27 8026061000006112  
28 12085821000006115  
29 12370371000006113  
30 8019521000006112  
31 8027511000006119  
32 12704941000006117  
33 292541011  
34 12332751000006115  
35 12705071000006113  
36 12334621000006111  
37 3537388019  
38 12370281000006118  
39 7708091000006118  
40 7287611000006113  
41 913811000006115  
42 84341000006119  
43 457326014  
44 292540012  
45 7066041000006112  
46 12102631000006116  
47 8077141000006113  
48 12370721000006111  
49 928461000006119  
50 616611000006111  
51 8119341000006116

For peer review only

1 12370891000006119  
2 8032751000006114  
3 12370801000006114  
4 8019541000006117  
5 8032731000006119  
6 6971901000006117  
7 12332761000006118  
8 12702371000006116  
9 84461000006114  
10 12345461000006119  
11 197984010  
12 3522045015  
13 12370621000006115  
14 7500221000006113  
15 7814941000006115  
16 4796311000006117  
17 12102661000006113  
18 8032781000006118  
19 8022541000006117  
20 8119331000006114  
21 12370611000006111  
22 7500251000006116  
23 938301000006114  
24 84441000006110  
25 84331000006112  
26 913481000006113  
27 5754581000006110  
28 12363671000006118  
29 84281000006115  
30 84301000006116  
31 84311000006118  
32 292548017  
33 12489581000006110  
34 7095251000006110  
35 429971019  
36 6969521000006113  
37 12370941000006118  
38 12370931000006111  
39 12370821000006116  
40 8022481000006112  
41 8022491000006110  
42 8027451000006119  
43 8043331000006112  
44 7969221000006111  
45 8043321000006114  
46 8032771000006116  
47 84431000006117  
48 913901000006112  
49 12370271000006116  
50 12363661000006113

For peer review only

1 8022461000006119  
2 12705001000006119  
3 12702361000006111  
4 84391000006111  
5 12370811000006112  
6 8043601000006110  
7 8034441000006111  
8 12370881000006117  
9 7075891000006110  
10 12370901000006115  
11 12085831000006117  
12 8030331000006117  
13 913451000006117  
14 84351000006117  
15 84381000006113  
16 913511000006117  
17 12334611000006115  
18 1665751000000119  
19 459161015  
20 459296014  
21 8025171000006111  
22 12370741000006116  
23 8032081000006115  
24 928521000006112  
25 299601000000114  
26 616681000006116  
27 616591000006117  
28 616601000006113  
29 616641000006110  
30 616651000006112  
31 616671000006119  
32 292482014  
33 616661000006114  
34 459162010  
35 771381000006115  
36 771401000006115  
37 772141000006118  
38 913651000006115  
39 913831000006114  
40 913921000006119  
41 913981000006115  
42 6051171000006117  
43 2949881000006116  
44 772181000006112  
45 913681000006111  
46 2949871000006119  
47 771331000006116  
48 771371000006118  
49 771411000006117  
50 772131000006111

For peer review only

1  
2 772151000006116  
3 787111000006112  
4 771421000006113  
5 2867421000006114  
6 772171000006114  
7  
8 913711000006112  
9 913891000006113  
10 771341000006114  
11 772161000006119  
12 913531000006111  
13 2867431000006112  
14 11927551000006115  
15 459293018  
16 771361000006113  
17 913771000006115  
18 913801000006118  
19 72651000006114  
20 6050071000006111  
21 6050041000006115  
22 77727018  
23 771351000006111  
24 771391000006117  
25 913621000006112  
26 429972014  
27 292551012  
28 429970018  
29 457325013  
30 459294012  
31 292550013  
32 84681000006118  
33 84711000006117  
34 84821000006118  
35 913461000006115  
36 913851000006119  
37 928491000006110  
38 928511000006116  
39 928531000006110  
40 938311000006112  
41 6960431000006119  
42 6970631000006112  
43 6972441000006117  
44 6979991000006111  
45 6050061000006116  
46 6980431000006116  
47 84751000006116  
48 913671000006113  
49 913791000006119  
50 1667941000000112  
51 913491000006111  
52 8022411000006117

For peer review only

1  
2 8027421000006111  
3 7609891000006111  
4 12102651000006111  
5 12363221000006116  
6 12345481000006112  
7  
8 6969531000006111  
9 7098221000006112  
10 84661000006111  
11 7966551000006114  
12  
13 12702381000006118  
14 8014491000006111  
15 928471000006114  
16 84781000006112  
17 84801000006111  
18 2288011000000114  
19 6971881000006119  
20 7098231000006110  
21 913911000006110  
22  
23 292543014  
24 6951081000006112  
25 6954991000006112  
26 6961901000006111  
27 84741000006118  
28  
29 292538019  
30 12450761000006110  
31 8027461000006117  
32 7287621000006117  
33 6955501000006113  
34 6961091000006115  
35 84831000006115  
36 494564012  
37 459163017  
38 8232101000006117  
39 8027481000006110  
40 6971891000006116  
41 11903141000006113  
42 5754621000006110  
43 6965561000006116  
44 913551000006116  
45 459295013  
46 1658861000000113  
47 8030341000006110  
48 7609851000006117  
49 8027401000006118  
50 8027501000006117  
51 84811000006114  
52 84701000006115  
53 6962751000006117  
54 6986151000006117  
55 5754611000006119  
56  
57  
58  
59  
60

For peer review only



1  
2 913821000006111  
3 72721000006113  
4 84651000006114  
5 84671000006116  
6 84761000006119  
7  
8 7287651000006114  
9 3253241000006117  
10 12336111000006119  
11 8440231000006115  
12  
13 9312981000006113  
14 6965571000006111  
15 8014501000006115  
16 12336121000006110  
17 7609881000006113  
18 84691000006115  
19  
20 7609841000006119  
21 8022471000006114  
22 8440241000006113  
23 7708051000006112  
24 84791000006110  
25  
26 3253231000006110  
27 6961101000006114  
28 6951091000006110  
29 6971921000006110  
30 6971911000006119  
31 6960441000006112  
32 6972451000006115  
33 6980441000006114  
34 9312991000006111  
35 7066051000006114  
36 479511000000117  
37 308739015  
38 308744010  
39 308749017  
40 357623013  
41 308731017  
42 4805951000006112  
43 4805991000006118  
44 4805831000006110  
45 4805871000006113  
46 6663771000006119  
47 6663861000006116  
48 6663811000006119  
49 6663831000006113  
50 6663581000006111  
51 6663691000006113  
52 6663601000006118  
53 6663641000006116  
54 5123871000006118  
55 6663661000006117  
56  
57  
58  
59  
60

For peer review only

1  
2 6663901000006111  
3 5123981000006110  
4 6663911000006114  
5 6663891000006112  
6 308753015  
7 312521010  
8 198791000006112  
9 6663721000006115  
10 6663701000006113  
11 4805821000006112  
12 309331014  
13 905681000006112  
14 308733019  
15 7819261000006114  
16 5123881000006115  
17 6663551000006115  
18 6663651000006119  
19 6663621000006111  
20 6663801000006117  
21 308725015  
22 1583831000006118  
23 10111000033114  
24 6663881000006114  
25 6663681000006110  
26 6663871000006111  
27 5123971000006112  
28 5123911000006115  
29 6663711000006111  
30 308776017  
31 1629311000006117  
32 6663611000006115  
33 6663571000006113  
34 6663631000006114  
35 6663761000006114  
36 308750017  
37 40067019  
38 111418010  
39 5123891000006117  
40 5123901000006118  
41 6663731000006117  
42 4805751000006114  
43 308732012  
44 308740018  
45 7819251000006112  
46 309787016  
47 309790010  
48 309792019  
49 309794018  
50 309803012  
51 309816012  
52  
53  
54  
55  
56  
57  
58  
59  
60

For peer review only

1  
2 485614018  
3 1778239014  
4 371261000000111  
5 1875561000006119  
6 1875571000006114  
7 1875581000006112  
8 1875591000006110  
9 1875601000006119  
10 1875611000006116  
11 2275671000000111  
12 2275791000000115  
13 311496011  
14 312518013  
15 312520011  
16 312534011  
17 168751000006115  
18 5721431000006114  
19 6608771000006110  
20 4809221000006114  
21 4809101000006114  
22 11903911000006111  
23 3428901000006117  
24 3428891000006116  
25 3636561000006111  
26 3514956015  
27 3528266010  
28 5721471000006112  
29 8447281000006115  
30 3527061011  
31 3514958019  
32 3528262012  
33 3761491000006113  
34 8440031000006113  
35 3514955016  
36 2840701000006117  
37 6665221000006113  
38 8459501000006119  
39 5141721000006111  
40 3528259014  
41 5721461000006117  
42 5721491000006113  
43 8045661000006112  
44 8030351000006112  
45 5721451000006119  
46 3901751000006115  
47 7078501000006113  
48 2620951000006114  
49 3527731011  
50 8440041000006115  
51 3322481000006114

For peer review only

1  
2 12114051000006110  
3 8440051000006118  
4 6665271000006114  
5 162101000006115  
6 162111000006117  
7 16911000006114  
8 451461014  
9 3390411000006113  
10 5721481000006110  
11 11904431000006111  
12 6665311000006114  
13 6665281000006112  
14 6665211000006117  
15 3042571000006112  
16 4809181000006117  
17 2275751000000111  
18 5139351000006118  
19 426510015  
20 309802019  
21 1786545019  
22 3527712017  
23 162081000006111  
24 7144151000006115  
25 8030361000006114  
26 6631621000006116  
27 5141691000006118  
28 3528264013  
29 7144161000006118  
30 7099641000006113  
31 3636541000006112  
32 3042581000006110  
33 309812014  
34 297641010  
35 116082011  
36 1779323014  
37 359292012  
38 5141711000006115  
39 11826151000006116  
40 3527737010  
41 309805017  
42 162051000006115  
43 162301000006117  
44 2196791000000119  
45 889731000006111  
46 297544012  
47 309791014  
48 309804018  
49 5141701000006118  
50 7176491000006113  
51 168761000006118  
52  
53  
54  
55  
56  
57  
58  
59  
60

For peer review only

1 309788014  
2  
3 149911000006117  
4 162141000006118  
5 9357441000006116  
6 424981000006114  
7  
8 162231000006117  
9 2275711000000112  
10 300221014  
11 3125671000006112  
12 12114061000006112  
13  
14 8187771000006116  
15 8102191000006119  
16 8440071000006111  
17 8447181000006111  
18 2670341000006112  
19  
20 162191000006110  
21 162341000006115  
22 2275501000000119  
23 2275831000000110  
24  
25 909191000006119  
26 309789018  
27 309798015  
28 309800010  
29 5721501000006117  
30 162041000006117  
31 162131000006111  
32 219021000000114  
33 3428911000006119  
34 95067016  
35 6608791000006111  
36 6608781000006113  
37 1786505011  
38 889741000006118  
39 889761000006119  
40 889781000006112  
41 989331000006117  
42 989321000006115  
43 889751000006116  
44 889771000006114  
45 889791000006110  
46 889821000006118  
47 989291000006112  
48 989301000006113  
49 889811000006114  
50 989311000006111  
51 889801000006111  
52 3636511000006113  
53 3636521000006117  
54 3636571000006116  
55 92209015  
56  
57  
58  
59  
60

For peer review only

1  
2 114310015  
3 158442019  
4 309405011  
5 512234017  
6 1728151000006118  
7 309408013  
8 719321000006114  
9 308709013  
10 3619241000006113  
11 3691811000006110  
12 5140851000006119  
13 5128061000006112  
14 7701371000006112  
15 2675191000006111  
16 2573631000006113  
17 2573621000006110  
18 2675181000006113  
19 5141731000006114  
20 3086721000006111  
21 2573601000006117  
22 6682111000006115  
23 6682191000006113  
24 3744681000006118  
25 7951851000006113  
26 8091151000006111  
27 4054921000006114  
28 6682061000006116  
29 7951841000006111  
30 11851321000006119  
31 3086711000006115  
32 5140861000006117  
33 7861201000006113  
34 5128101000006110  
35 5141751000006119  
36 6682081000006114  
37 7615021000006116  
38 7861211000006111  
39 3086691000006118  
40 6682131000006114  
41 8091161000006113  
42 3744671000006116  
43 5140891000006113  
44 8155231000006110  
45 3343591000006116  
46 6681831000006111  
47 3087841000006114  
48 3765031000006115  
49 177301000006114  
50 7615031000006118  
51 5140881000006110

For peer review only

1 5055001000006112  
2 5140901000006112  
3 2675171000006110  
4 5124681000006116  
5 3086701000006118  
6 3691781000006113  
7 4597351000006115  
8 4060291000006118  
9 312579010  
10 7860991000006115  
11 8099911000006113  
12 8091171000006118  
13 3343601000006112  
14 7951831000006118  
15 2573611000006119  
16 6682091000006112  
17 3691801000006112  
18 8099901000006110  
19 6682221000006118  
20 6669061000006113  
21 8155241000006117  
22 6682101000006118  
23 4060271000006119  
24 301721015  
25 92208011  
26 6682171000006112  
27 8091131000006116  
28 7860981000006118  
29 8022621000006111  
30 6905051000006113  
31 6682031000006113  
32 3744691000006115  
33 2675201000006114  
34 6682161000006117  
35 2675161000006115  
36 6682141000006116  
37 3744661000006111  
38 6681821000006113  
39 6682041000006115  
40 3343611000006110  
41 4054931000006112  
42 6682151000006119  
43 4805601000006115  
44 7951821000006116  
45 297542011  
46 297639014  
47 6682071000006111  
48 7511501000006112  
49 114251000006118  
50 6670991000006115

For peer review only

1  
2 3343621000006119  
3 8320771000006119  
4 5006111000006112  
5 4805591000006111  
6 453243010  
7 308697013  
8 5141741000006116  
9 6682121000006111  
10 6682051000006118  
11 5124671000006119  
12 2905941000006111  
13 6682181000006110  
14 3343631000006116  
15 3400601000006117  
16 677561000006119  
17 286303015  
18 308705019  
19 4056181000006118  
20 2812511000006115  
21 6682211000006114  
22 3691791000006111  
23 6682201000006111  
24 38247018  
25 297644019  
26 354512012  
27 4806451000006111  
28 3949121000006118  
29 4806521000006115  
30 3949101000006111  
31 4782401000006112  
32 4409371000006113  
33 11814811000006110  
34 3329051000006116  
35 6682251000006110  
36 6682331000006111  
37 5128201000006117  
38 6682381000006112  
39 7731531000006110  
40 4409391000006114  
41 6682321000006113  
42 3075191000006112  
43 8027031000006117  
44 5141061000006115  
45 4806501000006113  
46 308859010  
47 2619411000006117  
48 3526201000006116  
49 2619391000006117  
50 308855016  
51 4782411000006110

For peer review only



1 354513019  
2  
3 2619401000006115  
4 6682341000006118  
5 6682311000006117  
6 308871016  
7  
8 3921461000006118  
9 6682271000006117  
10 6682351000006116  
11 4806471000006118  
12  
13 6669071000006118  
14 6995961000006113  
15 4409411000006114  
16 8320761000006114  
17 5141051000006117  
18 6682231000006115  
19  
20 309413012  
21 6682291000006116  
22 5864721000006113  
23  
24 147834015  
25 5850811000006111  
26 6682241000006113  
27 7858421000006118  
28 5864711000006117  
29 6682361000006119  
30 7858411000006114  
31 6682301000006115  
32 6682261000006112  
33 3075181000006114  
34 4409381000006111  
35 7288571000006116  
36 301716018  
37 3921451000006115  
38 6682281000006119  
39 3526191000006119  
40 6669081000006115  
41 4770951000006114  
42 312581012  
43 6682391000006110  
44 8103261000006110  
45 4409361000006118  
46 3949131000006115  
47 53211014  
48 4409351000006115  
49 6682411000006110  
50 2863061000006117  
51 3329071000006114  
52 6682431000006116  
53 4806511000006111  
54 4409341000006117  
55 2619381000006115  
56  
57  
58  
59  
60

For peer review only

1  
2 4806561000006114  
3 2619361000006113  
4 3329061000006119  
5 4409331000006110  
6 308867019  
7  
8 6682401000006112  
9 481428012  
10 4806541000006110  
11 6682421000006119  
12 107644019  
13 411061015  
14 85901000006116  
15 302956014  
16 3346691000006114  
17 3346681000006111  
18 8462351000006111  
19 7952051000006111  
20 7502561000006118  
21 8462411000006117  
22 3774141000006118  
23 2713501000006112  
24 2896501000006115  
25 8467581000006114  
26 3780301000006118  
27 2726621000006117  
28 2726631000006119  
29 8462371000006118  
30 6797981000006115  
31 7952041000006114  
32 4411741000006119  
33 7257811000006118  
34 7952021000006119  
35 1816421000006112  
36 7260561000006112  
37 8462391000006117  
38 3553391000006113  
39 906191000006113  
40 2532953017  
41 2872721013  
42 302953018  
43 8467541000006115  
44 2743411000006118  
45 3774151000006116  
46 8462331000006116  
47 3351341000006118  
48 303762015  
49 435370011  
50 8467551000006118  
51 3780311000006115  
52 85891000006115

For peer review only

1  
2 8467571000006111  
3 7952031000006116  
4 7294371000006118  
5 8467561000006116  
6 85931000006112  
7 8467591000006112  
8 309743013  
9 6705201000006110  
10 8462421000006113  
11 496249010  
12 8462541000006117  
13 3589851000006115  
14 8462531000006110  
15 8462441000006118  
16 8462461000006119  
17 3346671000006113  
18 8462481000006112  
19 8462511000006116  
20 3351311000006117  
21 8462601000006118  
22 8462581000006111  
23 8462611000006115  
24 8462561000006118  
25 496332018  
26 8462641000006116  
27 8462631000006114  
28 8462921000006118  
29 8462891000006112  
30 7821281000006113  
31 8462971000006117  
32 8462871000006111  
33 8462961000006112  
34 8462941000006113  
35 22303012  
36 3166561000006116  
37 3351321000006113  
38 3351351000006116  
39 3166571000006111  
40 6383601000006112  
41 2269901000000115  
42 2891431000006118  
43 5139611000006114  
44 41137017  
45 6204981000006116  
46 6797971000006118  
47 2601661000006118  
48 2338581000000110  
49 2269891000000116  
50  
51  
52  
53  
54  
55  
56  
57  
58  
59  
60

Autoimmune Hepatitis

For peer review only

|    |                                                          |
|----|----------------------------------------------------------|
| 1  |                                                          |
| 2  | Term                                                     |
| 3  | Pulmonary sarcoidosis                                    |
| 4  | Sarcoidosis                                              |
| 5  | Sarcoidosis of lung with sarcoidosis of lymph nodes      |
| 6  | [X]Sarcoidosis of other and combined sites               |
| 7  |                                                          |
| 8  | Meningitis due to sarcoidosis                            |
| 9  | Multiple cranial nerve palsies in sarcoidosis            |
| 10 | Polyneuropathy in sarcoidosis                            |
| 11 | Myopathy due to sarcoidosis                              |
| 12 | Hepatic granulomas in sarcoidosis                        |
| 13 | Myositis in sarcoidosis                                  |
| 14 | [X]Myositis in sarcoidosis classified elsewhere          |
| 15 |                                                          |
| 16 | Sarcoidosis of inferior turbinates                       |
| 17 | Sarcoid arthropathy                                      |
| 18 | Sarcoidosis of lung                                      |
| 19 | Sarcoidosis of skin                                      |
| 20 | Sarcoidosis of lymph nodes                               |
| 21 | Sarcoid myocarditis                                      |
| 22 | Sarcoid heart disease                                    |
| 23 | Granulomatous sarcoid nephropathy                        |
| 24 | Renal sarcoidosis                                        |
| 25 | Cutaneous sarcoidosis                                    |
| 26 | Skin sarcoidosis                                         |
| 27 | Lymph node sarcoidosis                                   |
| 28 | Sarcoidosis, lupus pernio type                           |
| 29 | Cardiac sarcoidosis                                      |
| 30 | Sarcoid meningitis                                       |
| 31 | Sarcoid neuropathy                                       |
| 32 | Sarcoid myopathy                                         |
| 33 | Sarcoid heart muscle disease                             |
| 34 | Neurosarcoidosis                                         |
| 35 | Mediastinal lymph node sarcoidosis                       |
| 36 | Stage 1 pulmonary sarcoidosis                            |
| 37 | Stage 3 pulmonary sarcoidosis                            |
| 38 | Stage 4 pulmonary sarcoidosis                            |
| 39 | Ocular sarcoidosis                                       |
| 40 | Acute skin sarcoidosis                                   |
| 41 | Sarcoid arthritis                                        |
| 42 | Sarcoidal granuloma of skin                              |
| 43 | Sarcoid uveitis                                          |
| 44 | Giant cell arteritis NOS                                 |
| 45 | [X]Other giant cell arteritis                            |
| 46 | Giant cell arteritis with polymyalgia rheumatica         |
| 47 | Giant cell arteritis                                     |
| 48 | Cerebral arteritis in giant cell arteritis               |
| 49 | Giant cell arteritis without polymyalgia rheumatica      |
| 50 | Temporal giant cell arteritis                            |
| 51 | Giant cell arteritis anterior ischaemic optic neuropathy |
| 52 | Arthritis                                                |
| 53 | Arthritis mutilans                                       |
| 54 |                                                          |
| 55 |                                                          |
| 56 |                                                          |
| 57 |                                                          |
| 58 |                                                          |
| 59 |                                                          |
| 60 |                                                          |

1 Psoriatic arthropathy  
2 Psoriatic arthritis  
3 Chronic arthritis  
4 Psoriatic arthropathy NOS  
5 Arthropathy  
6 Arthropathy associated with dermatological disorders  
7 Other general diseases with associated arthropathy  
8 Arthritis associated with other disease, shoulder  
9 Arthritis associated with other disease, elbow  
10 Arthritis associated with other disease, wrist  
11 Arthritis associated with other disease, hip  
12 Arthritis associated with other disease, knee  
13 Arthritis associated with other disease, ankle  
14 Arthritis associated with other disease, subtalar joint  
15 Arthritis associated with other disease, talonavicular joint  
16 Arthritis associated with other disease, other tarsal joint  
17 Arthropathy associated with disorders EC NOS  
18 Arthrosis of first carpometacarpal joint, unspecified  
19 Other and unspecified arthropathies  
20 Unspecified polyarthropathy of unspecified site  
21 Unspecified polyarthropathy of the shoulder region  
22 Unspecified polyarthropathy of the upper arm  
23 Unspecified polyarthropathy of the forearm  
24 Unspecified polyarthropathy of the hand  
25 Unspecified polyarthropathy of the pelvic region and thigh  
26 Unspecified polyarthropathy of the lower leg  
27 Unspecified polyarthropathy of the ankle and foot  
28 Unspecified polyarthropathy of other specified site  
29 Unspecified polyarthropathy of multiple sites  
30 Generalised arthritis  
31 Other specified arthropathy  
32 Other specified arthropathy of unspecified site  
33 Other specified arthropathy of the shoulder region  
34 Other specified arthropathy of the upper arm  
35 Other specified arthropathy of the forearm  
36 Other specified arthropathy of the hand  
37 Other specified arthropathy of the pelvic region and thigh  
38 Other specified arthropathy of the lower leg  
39 Other specified arthropathy of the ankle and foot  
40 Other specified arthropathy of other specified site  
41 Other specified arthropathy of multiple sites  
42 Other specified arthropathy NOS  
43 Arthropathy NOS, of unspecified site  
44 Arthropathy of joint of hand  
45 Arthropathy NOS, of other specified site  
46 Arthropathy NOS, of multiple sites  
47 Arthropathy of ankle and/or foot  
48 Other specified arthropathies  
49 Arthropathies NOS  
50 Psoriasis with arthropathy

1 [X]Other juvenile arthritis  
2 [X]Other specific arthropathies, not elsewhere classified  
3 [X]Other specified arthritis  
4 [X]Arthrosis  
5 Polyarthrosis  
6 [X]Other primary arthrosis of first carpometacarpal joint  
7 [X]Other secondary arthrosis of first carpometacarpal joint  
8 Arthrosis  
9 Arthritis of foot  
10 Ankle arthritis NOS  
11 Arthritis of knee  
12 Arthritis of hip  
13 Arthritis of wrist  
14 Arthritis of elbow  
15 Juvenile arthritis in psoriasis  
16 Distal interphalangeal psoriatic arthropathy  
17 Unspecified polyarthropathy or polyarthriti NOS  
18 Arthropathy NOS  
19 Arthropathy NOS, of the upper arm  
20 Arthropathy NOS, of the forearm  
21 Arthropathy NOS, of the pelvic region and thigh  
22 Arthropathy NOS, of the lower leg  
23 Arthritis of spine  
24 Arthritis of shoulder region joint  
25 Inflammatory polyarthriti  
26 Polyarthropathy  
27 Chronic arthritis of juvenile onset  
28 Referral to arthroscopy service  
29 Arthritis associated with other disease, 1st MTP joint  
30 Arthritis associated with other disease, DIP joint of finger  
31 Arthritis associated with other disease, dist rad-uln joint  
32 Arthritis associated with other disease, IP joint of toe  
33 Arthritis associated with other disease, lesser MTP joint  
34 Arthritis associated with other disease, MCP joint  
35 Arthritis associated with other disease, PIP joint of finger  
36 Arthritis associated with other disease, sacro-iliac joint  
37 Arthritis associated with other disease, sternoclavic joint  
38 Arthritis associated with other disease, tibio-fibular joint  
39 Arthropathy associated with another disorder  
40 Arthropathy associated with other conditions EC  
41 Arthropathy NOS  
42 Arthritis of hand  
43 [RFC] Arthritis  
44 [RFC] Arthritis  
45 [RFC] Arthropathy  
46 Inflammatory arthritis  
47 Arthritis of temporomandibular joint  
48 Psoriatic arthritis  
49 PsA (Psoriatic arthritis)  
50 PA (Psoriatic arthritis)

1 Psoriatic arthritis with spine involvement  
2 Juvenile chronic arthritis  
3 Juvenile psoriatic arthritis  
4 Juvenile psoriatic arthritis with psoriasis  
5 Psoriatic arthritis with distal interphalangeal joint involvement  
6 Arthritis/arthrosis  
7 Arthritis of spine  
8 Polyarthritis  
9 Inflammatory arthritis of multiple joints  
10 Arthritis of joint of toe  
11 Arthritis of left glenohumeral joint  
12 Arthritis of right glenohumeral joint  
13 Arthritis of right sternoclavicular joint  
14 Arthritis of left elbow  
15 Arthritis of left wrist  
16 Arthritis of right wrist  
17 Bilateral arthritis of finger of hand  
18 Arthritis of bilateral carpometacarpal joint of thumbs  
19 Arthritis of first carpometacarpal joint of left hand  
20 Arthritis of carpometacarpal joint of left thumb  
21 Arthritis of first carpometacarpal joint of right hand  
22 Arthritis of carpometacarpal joint of right thumb  
23 Arthritis of left ankle  
24 Arthritis of left foot  
25 Arthritis of right ankle  
26 Arthritis of right foot  
27 Bilateral arthritis of ankle  
28 Arthritis of bilateral ankle  
29 Arthritis of bilateral feet  
30 Arthritis of right sacroiliac joint  
31 Psoriatic arthritis mutilans  
32 Arthritis of finger of left hand  
33 Arthritis of finger of right hand  
34 Arthritis of left subtalar joint  
35 Arthritis of right subtalar joint  
36 Arthritis of facet joint of lumbar spine  
37 Arthritis of facet joint of cervical spine  
38 Arthritis associated with other disease, knee  
39 Multiple sclerosis  
40 Multiple sclerosis of the spinal cord  
41 Generalised multiple sclerosis  
42 Exacerbation of multiple sclerosis  
43 Multiple sclerosis NOS  
44 Secondary progressive multiple sclerosis  
45 Primary progressive multiple sclerosis  
46 Multiple sclerosis review  
47 Multiple sclerosis care plan agreed  
48 Multiple sclerosis multidisciplinary review  
49 Benign multiple sclerosis  
50 Malignant multiple sclerosis

1  
2 Multiple sclerosis of the brain stem  
3 Management of multiple sclerosis in onset phase  
4 Management of multiple sclerosis in early disease phase  
5 Management of multiple sclerosis in stable disability phase  
6 Management of multiple sclerosis in palliative phase  
7  
8 [RFC] Multiple sclerosis  
9 [RFC] Multiple sclerosis  
10 Specialised services for patients with multiple sclerosis enhanced services administration  
11 Multiple sclerosis - personal health plan  
12 Multiple sclerosis - primary progressive  
13 Multiple sclerosis - secondary progressive  
14 Multiple sclerosis - relapsing remitting  
15 Multiple sclerosis review declined  
16 Multiple sclerosis monitoring administration  
17 Multiple sclerosis monitoring first letter  
18 Multiple sclerosis monitoring second letter  
19 Multiple sclerosis monitoring telephone invitation  
20 Multiple sclerosis monitoring third letter  
21 Management of multiple sclerosis in progressive disability phase  
22 Relapsing remitting multiple sclerosis  
23 Multiple sclerosis monitoring administration  
24 Multiple sclerosis monitoring first letter  
25 Multiple sclerosis monitoring third letter  
26 Multiple sclerosis monitoring telephone invite  
27 Referral to community multiple sclerosis team  
28 Multiple sclerosis questionnaire completed  
29 Suspected multiple sclerosis  
30 Referral by Multiple Sclerosis nurse specialist  
31 Suspected multiple sclerosis  
32 MS - Multiple sclerosis  
33 Multiple sclerosis of the brainstem  
34 Acute relapsing multiple sclerosis  
35 Chronic progressive multiple sclerosis  
36 Multiple sclerosis (MS) chronic/progressive  
37 Remittent-progressive multiple sclerosis  
38 Excision of multiple scrotal sebaceous cysts  
39 Kurtzke multiple sclerosis rating scale  
40 Multiple sclerosis (MS) secondary progressive  
41 Multiple sclerosis (MS) relapsing remitting  
42 Multiple sclerosis (MS) primary progressive  
43 Dementia associated with multiple sclerosis  
44 Multiple sclerosis clinic  
45 Progressive relapsing multiple sclerosis  
46 Possible MS  
47 Multiple sclerosis  
48 Autoimmune hepatitis type 1  
49 Autoimmune hepatitis type 2  
50 Autoimmune hepatitis  
51 Autoimmune hepatitis type 3  
52 Lupoid hepatitis



1 Autoimmune chronic active hepatitis  
2 Orofacial Crohn's disease  
3 Arthropathy in Crohn's disease  
4 Regional enteritis - Crohn  
5 [X]Other Crohn's disease  
6 Crohn's disease NOS  
7 CD - Crohn's disease  
8 Crohn disease of large bowel  
9 Crohn disease of duodenum  
10 Crohns disease, small intestine  
11 Crohn disease of terminal ileum  
12 Crohn disease of ileum  
13 Crohn's disease of colon  
14 Crohns disease, colon  
15 Crohn disease of colon  
16 Crohn's disease of rectum  
17 Crohn's disease of gastrointestinal anastomosis  
18 Crohn's gastritis  
19 Crohn disease of stomach  
20 Crohn disease of intestine  
21 Crohn's disease of penis  
22 Fistula of small intestine due to Crohn's disease  
23 Crohn's disease of intestine  
24 Crohn disease of vulva  
25 Rectal hemorrhage due to Crohn's disease  
26 Crohn disease of appendix  
27 Intestinal obstruction due to Crohn's disease of small and large intestine  
28 Rectal hemorrhage due to Crohn's disease of small and large intestines  
29 Crohn disease of scrotum  
30 Crohn disease of pylorus  
31 Crohn's disease of esophagus  
32 Rectal hemorrhage due to Crohn's disease of large intestine  
33 Fistula of large intestine due to Crohn's disease  
34 Crohn's disease of oesophagus  
35 Abscess of intestine co-occurrent and due to Crohn's disease of small and large intestine  
36 Metastatic Crohn's disease of skin  
37 Penile Crohn's disease  
38 Extraintestinal Crohn's  
39 Complication due to Crohn's disease of small intestine  
40 Intestinal obstruction due to Crohn's disease of large intestine  
41 Rectal haemorrhage due to Crohn's disease  
42 Rectal haemorrhage due to Crohn's disease of small and large intestines  
43 Complication due to Crohn's disease  
44 Crohn stricture of colon  
45 Intestinal obstruction due to Crohn's disease of small intestine  
46 Crohn disease of pyloric antrum  
47 Crohn's disease with arthritis  
48 Crohn disease of skin  
49 Crohn disease of jejunum  
50 Crohn's regional enteritis

1 Crohn's disease of terminal ileum  
2 Crohn's disease in remission  
3 Arthritis co-occurrent and due to Crohn disease  
4 Crohn's disease of jejunum  
5 Crohn's disease of stomach  
6 Crohn's stricture of colon  
7 Perianal Crohn disease  
8 Crohn's disease of pyloric antrum  
9 Crohn's ileitis  
10 Crohn's disease  
11 Crohn's disease of small intestine and colon  
12 Complication due to Crohn's disease of large intestine  
13 Fistula of intestine due to Crohn's disease of small and large intestine  
14 Metastatic Crohn disease of skin  
15 CC - Crohn's colitis  
16 Iritis with Crohn's disease  
17 Iritis with Crohn disease  
18 Gastrointestinal Crohn disease  
19 Crohn's disease of pylorus  
20 Crohn disease  
21 Oral Crohn's disease  
22 Exacerbation of Crohn's disease of small intestine  
23 Abscess of intestine co-occurrent and due to Crohn's disease of large intestine  
24 Abscess of small intestine due to Crohn's disease  
25 Rectal hemorrhage due to Crohn's disease of small intestine  
26 Crohn's disease of ileum  
27 Crohn disease of esophagus  
28 Extra-intestinal Crohn's  
29 Rectal haemorrhage due to Crohn's disease of large intestine  
30 Crohn's oesophagitis  
31 Crohn disease of oesophagus  
32 Crohn's disease of vulva  
33 Perianal Crohn's disease  
34 Complication due to Crohn's disease of small and large intestines  
35 Crohn's proctitis  
36 Exacerbation of Crohn disease of large intestine  
37 Crohn's disease of duodenum  
38 Crohns disease, large intestine  
39 Crohn disease of small intestine  
40 [RFC] Crohns disease  
41 Exacerbation of Crohn's disease of large intestine  
42 Abscess of intestine co-occurrent and due to Crohn's disease  
43 Crohn's esophagitis  
44 Crohn disease of penis  
45 Arthritis co-occurrent and due to Crohn's disease  
46 Crohn's disease of small intestine  
47 Crohn's disease of scrotum  
48 Abscess of intestine co-occurrent and due to Crohn's disease of small intestine  
49 Vulval Crohn's disease  
50 Crohn's disease of large bowel

1 Rectal haemorrhage due to Crohn's disease of small intestine  
2 Crohn disease in remission  
3 Crohn disease of rectum  
4 Arthropathy in Crohn disease  
5 Crohn's duodenitis  
6 Crohn disease of upper gastrointestinal tract  
7 Crohn's jejunitis  
8 Abscess of intestine due to Crohn's disease  
9 Crohn disease of anal canal  
10 Crohn's disease of skin  
11 Perianal fistula due to Crohn's disease  
12 Gastrointestinal Crohn's disease  
13 Crohn's disease of gingivae  
14 Crohn's disease of small AND large intestines  
15 Crohn disease of small AND large intestines  
16 Scrotal Crohn's disease  
17 Intestinal obstruction due to Crohn's disease  
18 Exacerbation of Crohn disease of small intestine  
19 Crohn's disease of oral soft tissues  
20 Crohns disease  
21 Crohn's disease of the ileum unspecified  
22 Regional enteritis of the jejunum  
23 Regional enteritis NOS  
24 Regional enteritis of the colon  
25 Regional enteritis of rectum  
26 RE - regional enteritis  
27 Regional enteritis of the rectum  
28 Regional enteritis of the duodenum  
29 Regional enteritis of the large bowel  
30 Regional enteritis  
31 Regional enteritis of small intestine  
32 Regional enteritis of the small bowel  
33 Granulomatous enteritis  
34 Granulomatous enteritis  
35 Chronic ulcerative ileocolitis  
36 Ulcerative ileocolitis  
37 Regional ileocolitis  
38 GC - Granulomatous colitis  
39 Granulomatous colitis  
40 Type 1 diabetes mellitus maturity onset  
41 Type 1 diabetes mellitus with arthropathy  
42 Type 1 diabetes mellitus with persistent microalbuminuria  
43 Type 1 diabetes mellitus in remission  
44 Unstable type 1 diabetes mellitus  
45 Type 1 diabetes mellitus - poor control  
46 Type 1 diabetes mellitus with nephropathy  
47 Type 1 diabetes mellitus with polyneuropathy  
48 Type 1 diabetes mellitus with ulcer  
49 Pre-existing type 1 diabetes mellitus in pregnancy  
50 Type 1 diabetes mellitus with peripheral angiopathy

- 1
- 2 Type 1 diabetes mellitus with peripheral angiopathy
- 3 Retinopathy co-occurrent and due to type 1 diabetes mellitus
- 4 Neuropathic arthropathy due to type 1 diabetes mellitus
- 5 Gangrene associated with type 1 diabetes mellitus
- 6 Peripheral circulatory disorder associated with type 1 diabetes mellitus
- 7 Exudative maculopathy co-occurrent and due to type 1 diabetes mellitus
- 8 Polyneuropathy co-occurrent and due to type 1 diabetes mellitus
- 9 Type 1 diabetes mellitus with hyperosmolar coma
- 10 Type 1 diabetes mellitus with hypoglycemic coma
- 11 Kidney disorder associated with type 1 diabetes mellitus
- 12 Diabetic retinopathy associated with type 1 diabetes mellitus
- 13 Type 1 diabetes mellitus with multiple complications
- 14 Type 1 diabetes mellitus with multiple complications
- 15 Type 1 diabetes mellitus with diabetic cataract
- 16 Type 1 diabetes mellitus with mononeuropathy
- 17 Type 1 diabetes mellitus with ophthalmic complications
- 18 Exudative maculopathy with type 1 diabetes mellitus
- 19 Retinopathy with type 1 diabetes mellitus
- 20 Chronic kidney disease stage 5 due to type 1 diabetes mellitus
- 21 Traction retinal detachment due to type 1 diabetes mellitus
- 22 Macular oedema due to type 1 diabetes mellitus
- 23 Lumbosacral radiculoplexus neuropathy co-occurrent and due to type 1 diabetes mellitus
- 24 Chronic ulcer of skin due to type 1 diabetes mellitus
- 25 Peripheral neuropathy with type 1 diabetes mellitus
- 26 Hypoglycemia due to type 1 diabetes mellitus
- 27 Hypertension concurrent and due to end stage renal disease on dialysis due to type 1 diabetes mellitu
- 28 Hypoglycaemic unawareness in type 1 diabetes mellitus
- 29 Nephrotic syndrome due to type 1 diabetes mellitus
- 30 Severe malnutrition due to type 1 diabetes mellitus
- 31 Vitreous haemorrhage due to type 1 diabetes mellitus
- 32 Foot ulcer due to type 1 diabetes mellitus
- 33 Osteomyelitis due to type 1 diabetes mellitus
- 34 Microalbuminuria due to type 1 diabetes mellitus
- 35 Hypoglycemic unawareness in type 1 diabetes mellitus
- 36 Mixed hyperlipidaemia due to type 1 diabetes mellitus
- 37 Cranial nerve palsy due to type 1 diabetes mellitus
- 38 Hypertension in chronic kidney disease due to type 1 diabetes mellitus
- 39 Chronic kidney disease stage 4 due to type 1 diabetes mellitus
- 40 Autonomic neuropathy co-occurrent and due to type 1 diabetes mellitus
- 41 Retinal ischemia due to type 1 diabetes mellitus
- 42 Type 1 diabetes mellitus well controlled
- 43 Rubeosis iridis due to type 1 diabetes mellitus
- 44 Proliferative retinopathy due to type 1 diabetes mellitus
- 45 Diabetic autonomic neuropathy due to type 1 diabetes mellitus
- 46 Disorder of nerve co-occurrent and due to type 1 diabetes mellitus
- 47 Diabetic oculopathy associated with type 1 diabetes mellitus
- 48 Retinal oedema due to type 1 diabetes mellitus
- 49 Mild nonproliferative retinopathy due to type 1 diabetes mellitus
- 50 Chronic kidney disease stage 2 due to type 1 diabetes mellitus
- 51 Rubeosis iridis with type 1 diabetes mellitus
- 52
- 53
- 54
- 55
- 56
- 57
- 58
- 59
- 60

1 Ankle ulcer due to type 1 diabetes mellitus  
2 Traction retinal detachment with type 1 diabetes mellitus  
3 Retinal oedema with type 1 diabetes mellitus  
4 Forefoot ulcer due to type 1 diabetes mellitus  
5 Ulcer of lower limb due to type 1 diabetes mellitus  
6 Dyslipidemia due to type 1 diabetes mellitus  
7 Hypoglycaemic coma in type 1 diabetes mellitus  
8 Dietary advice for type 1 diabetes  
9 Chronic kidney disease stage 1 due to type 1 diabetes mellitus  
10 Macular edema due to type 1 diabetes mellitus  
11 Referral to type 1 diabetes structured education programme  
12 Retinal ischaemia with type 1 diabetes mellitus  
13 Multiple complications of type 1 diabetes mellitus  
14 Renal disorder associated with type 1 diabetes mellitus  
15 Ketoacidosis in type 1 diabetes mellitus  
16 Type 1 diabetes mellitus without complication  
17 Peripheral angiopathy due to type 1 diabetes mellitus  
18 Mononeuropathy with type 1 diabetes mellitus  
19 Neurological disorder with type 1 diabetes mellitus  
20 Retinopathy with type 1 diabetes mellitus  
21 Disorder of eye with type 1 diabetes mellitus  
22 Dietary education for type 1 diabetes mellitus  
23 Erectile dysfunction with type 1 diabetes mellitus  
24 Autonomic neuropathy with type 1 diabetes mellitus  
25 Diabetic erectile dysfunction associated with type 1 diabetes mellitus  
26 Heel AND/OR midfoot ulcer due to type 1 diabetes mellitus  
27 Macular edema co-occurrent and due to type 1 diabetes mellitus  
28 Erectile dysfunction co-occurrent and due to type 1 diabetes mellitus  
29 Nonproliferative diabetic retinopathy due to type 1 diabetes mellitus  
30 End stage renal disease on dialysis due to type 1 diabetes mellitus  
31 Neurological disorder associated with type 1 diabetes mellitus  
32 Type 1 diabetes mellitus with gangrene  
33 Mononeuropathy with type 1 diabetes mellitus  
34 Gastroparesis due to type 1 diabetes mellitus  
35 Neurological disorder co-occurrent and due to type 1 diabetes mellitus  
36 Diabetic oculopathy due to type 1 diabetes mellitus  
37 Disorder of eye co-occurrent and due to type 1 diabetes mellitus  
38 Polyneuropathy due to type 1 diabetes mellitus  
39 Type 1 diabetes mellitus uncontrolled  
40 Type 1 diabetes mellitus with polyneuropathy  
41 Type 1 diabetes mellitus with hypoglycaemic coma  
42 Type 1 diabetes mellitus without complication  
43 Type 1 diabetes mellitus with ulcer  
44 Small vessel disease due to type 1 diabetes mellitus  
45 Cranial nerve palsy with type 1 diabetes mellitus  
46 Proteinuria due to type 1 diabetes mellitus  
47 Traction retinal detachment co-occurrent and due to type 1 diabetes mellitus  
48 Persistent proteinuria associated with type 1 diabetes mellitus  
49 Disorder due to type 1 diabetes mellitus  
50 Hyperglycemia due to type 1 diabetes mellitus

1  
2 Retinal oedema co-occurrent and due to type 1 diabetes mellitus  
3 Diabetic vitreous haemorrhage due to type 1 diabetes mellitus  
4 Retinal ischemia with type 1 diabetes mellitus  
5 Blindness due to type 1 diabetes mellitus  
6 Retinal ischaemia due to type 1 diabetes mellitus  
7 Hypoglycemic coma in type 1 diabetes mellitus  
8 Mononeuropathy co-occurrent and due to type 1 diabetes mellitus  
9 Mononeuropathy associated with type 1 diabetes mellitus  
10 Type 1 diabetes mellitus without complication  
11 Lumbosacral radiculoplexus neuropathy with type 1 diabetes mellitus  
12 Type 1 diabetes mellitus  
13 Hyperosmolarity due to type 1 diabetes mellitus  
14 Blindness co-occurrent and due to type 1 diabetes mellitus  
15 Pre-existing type 1 diabetes mellitus in pregnancy  
16 Acidosis due to type 1 diabetes mellitus  
17 Pre-existing type 1 diabetes mellitus  
18 Cranial nerve palsy co-occurrent and due to type 1 diabetes mellitus  
19 Diabetic vitreous hemorrhage due to type 1 diabetes mellitus  
20 Diabetic dermopathy due to type 1 diabetes mellitus  
21 Hyperglycaemia due to type 1 diabetes mellitus  
22 Nonproliferative retinopathy co-occurrent and due to type 1 diabetes mellitus  
23 Pregnancy and type 1 diabetes mellitus  
24 Exudative maculopathy with type 1 diabetes mellitus  
25 Type 1 diabetes mellitus with retinopathy  
26 Type 1 diabetes mellitus with gangrene  
27 Type 1 diabetes mellitus with ophthalmic complications  
28 Brittle type 1 diabetes mellitus  
29 Gastroparesis co-occurrent and due to type 1 diabetes mellitus  
30 Type 1 diabetes mellitus  
31 Type 1 diabetes mellitus maturity onset  
32 Type 1 diabetes mellitus with arthropathy  
33 Type 1 diabetes mellitus - poor control  
34 Type 1 diabetes mellitus with gangrene  
35 Hyperosmolality due to uncontrolled type 1 diabetes mellitus  
36 Unstable type 1 diabetes mellitus  
37 Persistent microalbuminuria associated with type 1 diabetes mellitus  
38 Moderate nonproliferative retinopathy co-occurrent and due to type 1 diabetes mellitus  
39 Mild nonproliferative retinopathy co-occurrent and due to type 1 diabetes mellitus  
40 Retinal ischemia co-occurrent and due to type 1 diabetes mellitus  
41 Peripheral neuropathy due to type 1 diabetes mellitus  
42 Peripheral neuropathy co-occurrent and due to type 1 diabetes mellitus  
43 Chronic kidney disease stage 3 due to type 1 diabetes mellitus  
44 Hyperlipidemia due to type 1 diabetes mellitus  
45 Mixed hyperlipidemia due to type 1 diabetes mellitus  
46 Hyperlipidaemia due to type 1 diabetes mellitus  
47 Vitreous hemorrhage due to type 1 diabetes mellitus  
48 Type 1 diabetes mellitus with renal complications  
49 Type 1 diabetes mellitus with diabetic cataract  
50 Disorder of eye with type 1 diabetes mellitus  
51 Gastroparesis with type 1 diabetes mellitus  
52

1 Diabetic neuropathic arthropathy due to type 1 diabetes mellitus  
2 Exudative maculopathy associated with type 1 diabetes mellitus  
3 Diabetic cataract associated with type 1 diabetes mellitus  
4 Type 1 diabetes mellitus with neuropathic arthropathy  
5 Retinal ischaemia co-occurrent and due to type 1 diabetes mellitus  
6 Moderate nonproliferative retinopathy due to type 1 diabetes mellitus  
7 Retinal edema due to type 1 diabetes mellitus  
8 Retinal edema with type 1 diabetes mellitus  
9 Amyotrophy due to type 1 diabetes mellitus  
10 Retinal edema co-occurrent and due to type 1 diabetes mellitus  
11 Macular oedema co-occurrent and due to type 1 diabetes mellitus  
12 Chronic kidney disease due to type 1 diabetes mellitus  
13 Type 1 diabetes mellitus with renal complications  
14 Type 1 diabetes mellitus with mononeuropathy  
15 Type 1 diabetes mellitus with neurological complications  
16 Type 1 diabetes mellitus with neurological complications  
17 Neurological disorder with type 1 diabetes mellitus  
18 Type 1 diabetic dietary review  
19 Type 1 diabetes mellitus with hypoglycaemic coma  
20 Type 1 diabetes mellitus with neuropathic arthropathy  
21 Hypoglycaemia due to type 1 diabetes mellitus  
22 Rubeosis iridis co-occurrent and due to type 1 diabetes mellitus  
23 Sensory neuropathy due to type 1 diabetes mellitus  
24 Ketoacidotic coma in type 1 diabetes mellitus  
25 Gastroparesis with type 1 diabetes mellitus  
26 Diabetes mellitus, juvenile, + other specified manifestation  
27 Diabetes mellitus, juvenile +peripheral circulatory disorder  
28 Diabetes mellitus, juvenile type, + ophthalmic manifestation  
29 Diabetes mellitus, juvenile type, with ketoacidosis  
30 Diabetes mellitus, juvenile type, with ketoacidotic coma  
31 Diabetes mellitus, juvenile, + neurological manifestation  
32 Diabetes mellitus, juvenile type, with hyperosmolar coma  
33 Diabetes mellitus, juvenile type, with renal manifestation  
34 Insulin dependent diabetes mellitus with hypoglycaemic coma  
35 Insulin dependent diabetes mellitus with multiple complicatn  
36 Insulin dependent diabetes mellitus with polyneuropathy  
37 Insulin dependent diab mell with peripheral angiopathy  
38 Insulin dependent diabetes mellitus with retinopathy  
39 Insulin dependent diabetes mellitus with nephropathy  
40 Insulin dependent diab mell with peripheral angiopathy  
41 Insulin dependent diab mell with neuropathic arthropathy  
42 Insulin dependent diabetes mellitus with arthropathy  
43 Insulin dependent diabetes mellitus type 1B  
44 Insulin dependent diabetes mellitus - poor control  
45 Insulin dependent diabetes mellitus - poor control  
46 Insulin dependent diabetes mellitus type 1B  
47 Insulin dependent diabetes mellitus with arthropathy  
48 Insulin dependent diabetes mellitus with mononeuropathy  
49 Insulin dependent diabetes mellitus with retinopathy  
50 Insulin dependent diab mell with neuropathic arthropathy



1  
2 Insulin dependent diabetes maturity onset  
3 IDDM-Insulin dependent diabetes mellitus  
4 Insulin dependent diabetes mellitus with ulcer  
5 Insulin dependent diabetes mellitus type 1A  
6 Insulin dependent diabetes mellitus  
7 Insulin dependent diabetes maturity onset  
8 Insulin dependent diabetes mellitus with diabetic cataract  
9 Insulin dependent diabetes mellitus with diabetic cataract  
10 Insulin dependent diabetes mellitus  
11 Insulin dependent diabetes mellitus with multiple complicat  
12 Insulin dependent diabetes mellitus type IA  
13 Insulin dependent diabetes mellitus with ulcer  
14 Insulin dependent diabetes mellitus with arthropathy  
15 Insulin dependent diabetes mellitus with hypoglycaemic coma  
16 Insulin dependent diabetes mellitus with mononeuropathy  
17 Insulin dependent diabetes mellitus with polyneuropathy  
18 Unstable insulin dependent diabetes mellitus  
19 Insulin dependent diabetes mellitus with hypoglycemic coma  
20 Insulin dependent diabetes mellitus with hypoglycaemic coma  
21 Insulin dependent diabetes mellitus  
22 Insulin dependent diabetes mellitus with gangrene  
23 Insulin dependent diabetes mellitus with nephropathy  
24 Insulin dependent diabetes mellitus with gangrene  
25 Unstable insulin dependent diabetes mellitus  
26 Type I diabetes mellitus maturity onset  
27 Unstable type I diabetes mellitus  
28 Type I diabetes mellitus without complication  
29 Type I diabetes mellitus with arthropathy  
30 Type I diabetes mellitus - poor control  
31 Type I diabetes mellitus with arthropathy  
32 Type I diabetes mellitus with hypoglycaemic coma  
33 Type I diabetes mellitus with ulcer  
34 Type I diabetes mellitus with renal complications  
35 Type I diabetes mellitus with nephropathy  
36 Type I diabetes mellitus with persistent microalbuminuria  
37 Type I diabetes mellitus with ketoacidosis  
38 Type I diabetes mellitus with ketoacidotic coma  
39 Type I diabetes mellitus with exudative maculopathy  
40 Diabetic retinopathy associated with type I diabetes mellitus  
41 Peripheral circulatory disorder associated with type I diabetes mellitus  
42 Neurological disorder associated with type I diabetes mellitus  
43 Renal disorder associated with type I diabetes mellitus  
44 Type I diabetes mellitus with hypoglycemic coma  
45 Diabetic cataract associated with type I diabetes mellitus  
46 Type I diabetes mellitus with neurological complications  
47 Type I diabetes mellitus with retinopathy  
48 Type I diabetes mellitus with mononeuropathy  
49 Type I diabetes mellitus with gastroparesis  
50 Type I diabetes mellitus with ophthalmic complications  
51 Hypertension in chronic kidney disease due to type I diabetes mellitus



1  
2 Chronic kidney disease stage 2 due to type I diabetes mellitus  
3 Retinopathy due to brittle type I diabetes mellitus  
4 Cranial nerve palsy with type I diabetes mellitus  
5 Autonomic neuropathy with type I diabetes mellitus  
6 Lumbosacral radiculoplexus neuropathy with type I diabetes mellitus  
7 Persistent microalbuminuria associated with type I diabetes mellitus  
8 Dietary education for type I diabetes mellitus  
9 Type I diabetes mellitus poorly controlled  
10 Erectile dysfunction associated with type I diabetes mellitus  
11 Diabetic oculopathy due to type I diabetes mellitus  
12 Peripheral vascular disease due to type I diabetes  
13 Type I diabetes mellitus with persistent proteinuria  
14 Type I diabetes mellitus with peripheral angiopathy  
15 Type I diabetes mellitus with renal complications  
16 Type I diabetes mellitus in remission  
17 Hypoglycemic coma in type I diabetes mellitus  
18 Dietary advice for type I diabetes  
19 Type I diabetes mellitus with diabetic cataract  
20 Type I diabetes mellitus with gangrene  
21 Ketoacidosis in type I diabetes mellitus  
22 Exudative maculopathy associated with type I diabetes mellitus  
23 Disorder associated with type I diabetes mellitus  
24 Type I diabetes mellitus with nephropathy  
25 Type I diabetes mellitus with ulcer  
26 Type I diabetes mellitus with gangrene  
27 Chronic kidney disease stage 3 due to type I diabetes mellitus  
28 Type I diabetes mellitus uncontrolled  
29 Persistent proteinuria associated with type I diabetes mellitus  
30 Gangrene associated with type I diabetes mellitus  
31 Type I diabetes mellitus without complication  
32 Type I diabetes mellitus  
33 Type I diabetes mellitus with hypoglycaemic coma  
34 Referral to type I diabetes structured education programme  
35 Chronic kidney disease stage 4 due to type I diabetes mellitus  
36 Hypoglycaemic coma in type I diabetes mellitus  
37 Diabetic oculopathy associated with type I diabetes mellitus  
38 Labile type I diabetes mellitus  
39 Ketoacidotic coma in type I diabetes mellitus  
40 Type I diabetes mellitus with multiple complications  
41 Type I diabetes mellitus with neuropathic arthropathy  
42 Type I diabetic dietary review  
43 Chronic kidney disease due to type I diabetes mellitus  
44 Neuropathy due to brittle type I diabetes mellitus  
45 Chronic kidney disease stage 1 due to type I diabetes mellitus  
46 Chronic kidney disease stage 5 due to type I diabetes mellitus  
47 Type I diabetes mellitus with retinopathy  
48 Type I diabetes mellitus with gangrene  
49 Mononeuropathy associated with type I diabetes mellitus  
50 Multiple complications of type I diabetes mellitus  
51 Brittle type I diabetes mellitus

- 1
- 2 Type I diabetes mellitus with polyneuropathy
- 3 Unstable type I diabetes mellitus
- 4 Type I diabetes mellitus
- 5 Type I diabetes mellitus maturity onset
- 6 Type I diabetes mellitus with neuropathic arthropathy
- 7 Type I diabetes mellitus well controlled
- 8 Diabetes mellitus type 1
- 9 Cataract due to diabetes mellitus type 1
- 10 Eating disorder co-occurrent with diabetes mellitus type 1
- 11 Skin ulcer of toe due to diabetes mellitus type 1
- 12 Diabetes mellitus type 1 with ketoacidotic coma
- 13 Diabetes mellitus type 1 without retinopathy
- 14 Cataract co-occurrent and due to diabetes mellitus type 1
- 15 Retinopathy due to unstable diabetes mellitus type 1
- 16 Cataract due to diabetes mellitus type 1
- 17 Neuropathy due to unstable diabetes mellitus type 1
- 18 Diabetes mellitus type 1 with diabetic Charcot's arthropathy
- 19 ED-DMT1 - Eating disorder-diabetes mellitus type 1
- 20 Gastroparesis due to diabetes mellitus type I
- 21 Polyneuropathy due to diabetes mellitus type I
- 22 Diabetes mellitus type I
- 23 Diabetes type 1 with gangrene
- 24 Diabetes type 1 with ketoacidosis
- 25 Diabetes type 1 with hypoglycaemic coma
- 26 Diabetes type 1 with hypoglycemic coma
- 27 Diabetes type 1 with retinopathy
- 28 Diabetes type 1 with neurological disorder
- 29 Diabetes type 1 with cataract
- 30 Diabetes type 1 with diabetic ulcer of toe, skin breakdown
- 31 Diabetes type 1 with small vessel disease
- 32 Diabetes type 1 review
- 33 Psoriasis geographica
- 34 Psoriasis palmaris
- 35 Psoriasis universalis
- 36 Scalp psoriasis
- 37 Other psoriasis
- 38 Psoriasis vulgaris & (Chronic large plaque psoriasis)
- 39 Exfoliative dermatitis due to psoriasis
- 40 Discoid psoriasis
- 41 Rupoid psoriasis
- 42 Drug-exacerbated psoriasis
- 43 Onset of psoriasis in adolescence (10-20 years)
- 44 Acute generalized pustular flare of preexisting plaque psoriasis
- 45 Early onset psoriasis type 1
- 46 Actively extending plaque psoriasis
- 47 Photoaggravated psoriasis
- 48 Guttate flare of psoriasis with preexisting plaques
- 49 Penile psoriasis
- 50 Unstable psoriasis
- 51 Perianal psoriasis
- 52
- 53
- 54
- 55
- 56
- 57
- 58
- 59
- 60

1 Familial psoriasis with affected first degree relative  
2 Kobner psoriasis  
3 Familial psoriasis without affected first degree relative  
4 Familial psoriasis  
5 Psoriasis  
6 Psoriasis with arthropathy  
7 Plaque psoriasis  
8 Facial psoriasis  
9 Psoriasis of scalp margin  
10 Nummular psoriasis  
11 [X]Other psoriasis  
12 [RFC] Psoriasis  
13 Psoriasis annularis  
14 Anogenital psoriasis  
15 Psoriasis-eczema overlap condition  
16 Chronic small plaque psoriasis  
17 Psoriasis of perianal skin  
18 Vulval psoriasis  
19 Acute generalised pustular flare of preexisting plaque psoriasis  
20 Psoriasis and similar disorders  
21 Chronic large plaque psoriasis  
22 Psoriasis And Eczema  
23 Late onset psoriasis type 2  
24 Generalized psoriasis  
25 Onset of psoriasis in early adulthood (20-40 years)  
26 K bner psoriasis  
27 Psoriasis of nail  
28 Psoriasis of face  
29 Psoriasis and similar disorders NOS  
30 Chronic large plaque psoriasis  
31 Psoriasis of vulva  
32 Chronic stable plaque psoriasis  
33 Psoriasis of penis  
34 Non-pustular psoriasis of hands and feet  
35 Psoriasis vulgaris  
36 Small plaque parapsoriasis  
37 Large plaque parapsoriasis  
38 Eczematized psoriasis  
39 Eczematized psoriasis  
40 Non-pustular psoriasis of hands  
41 Psoriasis and similar disorders  
42 Psoriasis unspecified  
43 Psoriasis gyrata  
44 Psoriasis of anogenital region  
45 Rheumatoid arthritis of cervical spine  
46 Rheumatoid arthritis of sternoclavicular joint  
47 Rheumatoid arthritis of elbow  
48 Rheumatoid arthritis of wrist  
49 Rheumatoid arthritis of subtalar joint  
50 Flare of rheumatoid arthritis

1 Rheumatoid nodule  
2 Rheumatoid lung disease  
3 Delivery of rehabilitation for rheumatoid arthritis  
4 Rheumatoid arthritis monitoring invitation  
5 Rheumatoid arthritis monitoring telephone invitation  
6 Rheumatoid arthritis monitoring verbal invitation  
7 Rheumatoid arthritis monitoring invitation first letter  
8 Rheumatoid arthritis monitoring invitation second letter  
9 Rheumatoid arthritis monitoring invitation third letter  
10 Rheumatoid arthritis monitoring invitation first letter  
11 Rheumatoid arthritis monitoring verbal invitation  
12 Fibrosing alveolitis associated with rheumatoid arthritis  
13 [X]Other seropositive rheumatoid arthritis  
14 [X]Other specified rheumatoid arthritis  
15 [X]Seropositive rheumatoid arthritis, unspecified  
16 Rheumatoid arthritis and other inflammatory polyarthropathy  
17 Rheumatoid arthritis of multiple joints  
18 Rheumatoid pneumoconiosis  
19 Rheumatoid arthritis of first metatarsophalangeal joint  
20 Rheumatoid arthritis of distal radioulnar joint  
21 Seropositive erosive rheumatoid arthritis  
22 Rheumatoid arthritis, leucopenia AND splenomegaly  
23 Rheumatoid arthritis, leukopenia AND splenomegaly  
24 RhA - Rheumatoid arthritis  
25 Rheumatoid arthritis with erosion  
26 Rheumatoid arthritis of right hip  
27 Rheumatoid arthritis of hand  
28 Rheumatoid arthritis of right knee  
29 Deformity of left foot co-occurrent and due to rheumatoid arthritis  
30 Rheumatoid arthritis without erosion  
31 Rheumatoid arthritis of right hand  
32 Rheumatoid episcleritis  
33 Rheumatoid arthritis monitoring invitation by SMS (short message service) text messaging  
34 Erosion of joint surface co-occurrent and due to rheumatoid arthritis  
35 Dilated cardiomyopathy secondary to rheumatoid arthritis  
36 Accelerated rheumatoid nodulosis  
37 Rheumatoid arthritis monitoring invitation email  
38 Necrotizing rheumatoid vasculitis  
39 Rheumatoid arthritis of left hand  
40 Rheumatoid arthritis of hand joint  
41 Rheumatoid arthritis - ankle/foot  
42 Rheumatoid arthritis in remission  
43 Deformity of hand due to rheumatoid arthritis  
44 Rheumatoid arthritis - hand joint  
45 Uveitis-rheumatoid arthritis syndrome  
46 Rheumatoid arthritis of temporomandibular joint  
47 Pericarditis secondary to rheumatoid arthritis  
48 Deformity of right foot co-occurrent and due to rheumatoid arthritis  
49 Rheumatoid arthritis monitoring SMS (short message service) text message first invitation  
50 Rheumatoid nodule

1 Rheumatoid arthritis of left shoulder  
2 Rheumatoid arthritis monitoring SMS (short message service) text message second invitation  
3 Cutaneous atrophy due to rheumatoid arthritis  
4 Rheumatoid arthritis of lesser metatarsophalangeal joint  
5 Rheumatoid arthritis of metacarpophalangeal joint  
6 Rheumatoid arthritis with organ / system involvement  
7 Seropositive erosive rheumatoid arthritis  
8 Rheumatoid fibrosing alveolitis  
9 Rheumatoid arthritis - ankle and/or foot  
10 Rheumatoid bursitis  
11 Cutaneous complication of rheumatoid disease  
12 Rheumatoid neutrophilic dermatitis  
13 Rheumatoid nodulosis  
14 Subcutaneous rheumatoid nodule  
15 Rheumatoid arthritis of tibiofibular joint  
16 Rheumatoid arthritis monitoring invitation third letter  
17 Rheumatoid arthritis with multisystem involvement  
18 Rheumatoid arthritis - multiple joint  
19 Rheumatoid arthritis of ankle  
20 Rheumatoid lung  
21 Deformity of left hand co-occurrent and due to rheumatoid arthritis  
22 Rheumatoid arthritis of interphalangeal joint of toe  
23 Deformity of wrist due to rheumatoid arthritis  
24 Rheumatoid hand deformity  
25 Rheumatoid arteritis  
26 Nailfold rheumatoid vasculitis  
27 Rheumatoid arthritis of left hip  
28 Rheumatoid wrist deformity  
29 Rheumatoid arthritis of foot  
30 RA - Rheumatoid arthritis  
31 Chronic rheumatoid nodular fibrosis  
32 Rheumatoid bursitis  
33 Myopathy due to rheumatoid arthritis  
34 Rheumatoid arthritis  
35 Rheumatoid vasculitis  
36 Seronegative rheumatoid arthritis  
37 Necrotising rheumatoid vasculitis  
38 Pericarditis co-occurrent with extraarticular rheumatoid arthritis  
39 Deformity of right hand co-occurrent and due to rheumatoid arthritis  
40 Rheumatoid arthritis of other tarsal joint  
41 Rheumatoid arthritis of distal radio-ulnar joint  
42 Rheumatoid lung  
43 Rheumatoid arthritis annual review  
44 Rheumatoid arthritis NOS  
45 Polyneuropathy in rheumatoid arthritis  
46 Rheumatoid arthritis of acromioclavicular joint  
47 Rheumatoid arthritis of talonavicular joint  
48 Systemic rheumatoid vasculitis  
49 Deformity of foot due to rheumatoid arthritis  
50 Rheumatoid arthritis of 1st metatarsophalangeal joint

1 Rheumatoid arthritis of spine  
2 Seropositive rheumatoid arthritis  
3 Rheumatoid arthritis of sacroiliac joint  
4 Seropositive rheumatoid arthritis of multiple joints  
5 [X]Rheumatoid arthritis+involvement/other organs or systems  
6 Rheumatoid arthropathy + visceral/systemic involvement NOS  
7 Rheumatoid arthritis monitoring invitation second letter  
8 Rheumatoid myocarditis  
9 Rheumatoid aortitis  
10 Rheumatoid arthritis of right shoulder  
11 Rheumatoid arthritis work instability scale  
12 Rheumatoid lung disease with rheumatoid arthritis  
13 Rheumatoid arthritis monitoring SMS (short message service) text message third invitation  
14 Rheumatoid arthritis of left knee  
15 Diffuse interstitial rheumatoid disease of lung  
16 Rheumatoid arthritis of tibio-fibular joint  
17 Rheumatoid nodule  
18 Rheumatoid arthritis monitoring invitation  
19 Rheumatoid arthritis monitoring telephone invitation  
20 [RFC] Rheumatoid arthritis  
21 Rheumatoid arthritis of shoulder  
22 Rheumatoid arthritis of hip  
23 Rheumatoid arthritis of knee  
24 Rheumatoid arthritis of ankle and/or foot  
25 Rheumatoid arthritis of distal interphalangeal joint of finger  
26 Rheumatoid arthritis of proximal interphalangeal joint of finger  
27 Rheumatoid arthritis monitoring  
28 Felty syndrome  
29 Felty's syndrome  
30 Caplans syndrome  
31 Caplan's syndrome  
32 Caplan's syndrome  
33 Rheum. arth. - other joint  
34 Rheum. arth. - knee joint  
35 Rheum. arth. - hand joint  
36 Rheum. arth. - ankle/foot  
37 Rheum. arth. - knee joint  
38 Rheum. arth. - ankle/foot  
39 Rheum. arth. - hip joint  
40 Rheum. arth. - wrist joint  
41 Rheum. arth. - multiple joint  
42 Rheum. arth. - wrist joint  
43 Rheum. arth. - hand joint  
44 Rheum. arth. - shoulder joint  
45 Rheum. arth. - hip joint  
46 Rheum. arth. - elbow joint  
47 Atrophic arthritis  
48 Chronic rheumatic arthritis  
49 Proliferative arthritis  
50 Disseminated lupus erythematosus

1 Lupus nephritis  
2 Systemic lupus erythematosus encephalitis  
3 Drug-induced systemic lupus erythematosus  
4 Cerebral lupus  
5 Systemic lupus erythematosus encephalitis  
6 Systemic lupus erythematosus NOS  
7 Lupus - tuberculous  
8 Lupus erythematosus NOS  
9 Systemic lupus erythematosus glomerulonephritis syndrome  
10 Systemic lupus erythematosus glomerulonephritis syndrome, World Health Organization class I  
11 Limited lupus erythematosus  
12 Lupus erythematosus and erythema multiforme-like syndrome  
13 Gingival disease co-occurrent and due to lupus erythematosus  
14 Systemic lupus erythematosus glomerulonephritis syndrome, World Health Organization (WHO) class  
15 Systemic lupus erythematosus glomerulonephritis syndrome, World Health Organization class II  
16 Systemic lupus erythematosus glomerulonephritis syndrome, World Health Organization (WHO) class  
17 Systemic lupus erythematosus glomerulonephritis syndrome, World Health Organisation (WHO) class  
18 Lupus vasculitis  
19 Systemic lupus erythematosus glomerulonephritis syndrome, World Health Organization class IV  
20 Lupus nephritis - WHO Class II  
21 Lupus erythematosus-associated nailfold telangiectasia  
22 Lupus erythematosus-associated poikiloderma  
23 Systemic lupus erythematosus glomerulonephritis syndrome, World Health Organisation (WHO) class  
24 Hemolytic anemia associated with systemic lupus erythematosus  
25 Nephrotic syndrome co-occurrent and due to systemic lupus erythematosus  
26 Rash of systemic lupus erythematosus  
27 Lupus erythematosus-associated calcinosis  
28 Haemolytic anaemia associated with systemic lupus erythematosus  
29 Pericarditis co-occurrent and due to systemic lupus erythematosus  
30 Systemic lupus erythematosus glomerulonephritis syndrome, World Health Organization (WHO) class  
31 Skin and joint lupus  
32 Demyelination of central nervous system co-occurrent and due to systemic lupus erythematosus  
33 Chilblain lupus erythematosus  
34 Lupus erythematosus-associated vasculitis  
35 Lupus erythematosus-associated papulonodular mucinosis  
36 Lupus erythematosus of oral mucous membrane  
37 Demyelination with systemic lupus erythematosus  
38 Lupus nephritis - WHO Class IV  
39 Lupus erythematosus-associated urticarial vasculitis  
40 Nephrosis co-occurrent and due to systemic lupus erythematosus  
41 Systemic lupus erythematosus glomerulonephritis syndrome, World Health Organization (WHO) class  
42 Bullous systemic lupus erythematosus  
43 Cheilitis due to lupus erythematosus  
44 Membranous lupus glomerulonephritis  
45 Fulminating systemic lupus erythematosus  
46 Dilated cardiomyopathy secondary to systemic lupus erythematosus  
47 Lupus disease of the lung  
48 Renal tubulo-interstitial disorder in systemic lupus erythematosus  
49 Lupus erythematosus of oral mucosa  
50 Lupus panniculitis



1 Lupus pneumonia  
2 Systemic lupus erythematosus with multisystem involvement  
3 Lupus nephritis - WHO Class VI  
4 Lichen planus with lupus erythematosus  
5 Systemic lupus erythematosus glomerulonephritis syndrome, World Health Organisation (WHO) class  
6 Lupus nephritis - WHO Class I  
7 Lupus erythematosus (LE) cells present  
8 Cerebral systemic lupus erythematosus  
9 [X]Other forms of systemic lupus erythematosus  
10 Chorea with systemic lupus erythematosus  
11 Glomerular disease due to SLE (systemic lupus erythematosus)  
12 Nephrosis with systemic lupus erythematosus  
13 Lupus nephritis - WHO Class V  
14 Secondary autoimmune hemolytic anemia co-occurrent and due to systemic lupus erythematosus  
15 Systemic lupus erythematosus glomerulonephritis syndrome, World Health Organisation (WHO) class  
16 Lupus erythematosus-associated hypermelanosis  
17 Systemic lupus erythematosus glomerulonephritis syndrome, World Health Organization (WHO) class  
18 Glomerular disease due to systemic lupus erythematosus  
19 Nail dystrophy due to lupus erythematosus  
20 Lupus erythematosus overlap syndrome  
21 Lupus cheilitis  
22 Hypermelanosis due to lupus erythematosus  
23 Lupus encephalopathy  
24 Lung disease with systemic lupus erythematosus  
25 Systemic lupus erythematosus  
26 Necrotising vasculitis due to lupus erythematosus  
27 Nephropathy co-occurrent and due to systemic lupus erythematosus  
28 Chorea co-occurrent and due to systemic lupus erythematosus  
29 Endocarditis due to systemic lupus erythematosus  
30 Retinal vasculitis due to systemic lupus erythematosus  
31 Lupus erythematosus-associated anetoderma  
32 Systemic lupus erythematosus glomerulonephritis syndrome, World Health Organization class III  
33 Systemic lupus erythematosus glomerulonephritis syndrome, World Health Organization class VI  
34 Lupus erythematosus-associated necrotizing vasculitis  
35 Lupus with glomerular sclerosis  
36 Urticarial vasculitis due to lupus erythematosus  
37 Lupus nephritis - WHO Class III  
38 Acute systemic lupus erythematosus  
39 Anetoderma secondary to lupus erythematosus  
40 Systemic lupus erythematosus glomerulonephritis syndrome, World Health Organisation (WHO) class  
41 Butterfly rash associated with systemic lupus  
42 Lupus erythematosus-associated necrotising vasculitis  
43 Lupus  
44 Secondary autoimmune haemolytic anaemia co-occurrent and due to systemic lupus erythematosus  
45 Polyneuropathy in disseminated lupus erythematosus  
46 Myopathy due to disseminated lupus erythematosus  
47 Calcinosis secondary to lupus erythematosus  
48 Systemic lupus erythematosus in remission  
49 Systemic lupus erythematosus with organ/system involvement  
50 Systemic lupus erythematosus-associated antiphospholipid syndrome



1 Systemic lupus erythematosus glomerulonephritis syndrome, World Health Organization (WHO) class  
2 Systemic lupus erythematosus/Sjogren's overlap syndrome  
3 Chorea in systemic lupus erythematosus  
4 LE - Lupus erythematosus  
5 Systemic lupus erythematosus with pericarditis  
6 Lupus erythematosus  
7 Vasculitis due to lupus erythematosus  
8 Telangiectasia of nailfolds due to lupus erythematosus  
9 Subcutaneous nodule associated with lupus erythematosus  
10 Lichen planus-lupus erythematosus overlap  
11 Pericarditis secondary to systemic lupus erythematosus  
12 Necrotizing vasculitis due to lupus erythematosus  
13 Systemic lupus erythematosus glomerulonephritis syndrome, World Health Organization class V  
14 SLE - Systemic lupus erythematosus  
15 Nephrotic syndrome in systemic lupus erythematosus  
16 Tuberculosis - lupus NOS  
17 Lupus erythematosus nodularis  
18 Systemic lupus erythematosus arthritis  
19 Lupus hepatitis  
20 Lupus erythematosus-associated nail dystrophy  
21 Systemic lupus erythematosus glomerulonephritis syndrome, World Health Organisation (WHO) class  
22 Poikiloderma due to lupus erythematosus  
23 Linear scleroderma  
24 Myopathy due to scleroderma  
25 Renal involvement in scleroderma  
26 Localised scleroderma  
27 Scleroderma syndrome  
28 Morphoea scleroderma  
29 Systemic scleroderma  
30 Scleroderma lung disease  
31 Diffuse scleroderma  
32 Pericarditis co-occurrent and due to scleroderma  
33 Coup de sabre scleroderma  
34 Scleroderma-associated hypermelanosis  
35 Necrotising vasculitis due to scleroderma  
36 Sclerodermatomyositis  
37 Scleroderma-associated nail dystrophy  
38 Primary biliary cirrhosis co-occurrent with systemic scleroderma  
39 Diffuse cutaneous scleroderma  
40 Scleroderma-associated necrotizing vasculitis  
41 Dilated cardiomyopathy secondary to scleroderma  
42 Glomerulonephritis co-occurrent and due to scleroderma  
43 Scleroderma with multisystem involvement  
44 Localized scleroderma  
45 Circumscribed scleroderma  
46 Generalized scleroderma  
47 Hypothyroidism due to scleroderma  
48 Circumscribed scleroderma, generalised type  
49 Unspecified circumscribed scleroderma  
50 Scleroderma of lung

1 Acute scleroderma renal crisis  
2 Generalised scleroderma  
3 Necrotizing vasculitis due to scleroderma  
4 Scleroderma-associated necrotising vasculitis  
5 Circumscribed scleroderma NOS  
6 Pericarditis secondary to scleroderma  
7 Scleroderma-associated telangiectasia  
8 Scleroderma-associated poikiloderma  
9 Morphea scleroderma  
10 Occupational scleroderma  
11 Scleroderma  
12 Systemic sclerosis sine scleroderma  
13 Polymyositis/scleroderma overlap syndrome  
14 Scleroderma with organ / system involvement  
15 Scleroderma-associated calcinosis  
16 Scleroderma  
17 Scleroderma-associated nailfold telangiectasia  
18 Limited scleroderma  
19 Progressive systemic sclerosis  
20 Limited cutaneous systemic sclerosis  
21 Calcinosis cutis due to systemic sclerosis  
22 Pediatric onset systemic sclerosis  
23 Limited systemic sclerosis  
24 Poikiloderma due to systemic sclerosis  
25 Paediatric onset systemic sclerosis  
26 Telangiectasia of nailfolds due to systemic sclerosis  
27 Hypermelanosis due to systemic sclerosis  
28 Dilated cardiomyopathy due to systemic sclerosis  
29 Diffuse cutaneous systemic sclerosis  
30 PSS - Progressive systemic sclerosis  
31 Lung disease with systemic sclerosis  
32 Pericarditis due to systemic sclerosis  
33 Telangiectasia due to systemic sclerosis  
34 Hypothyroidism due to systemic sclerosis  
35 Cutaneous complication of systemic sclerosis  
36 Myopathy due to systemic sclerosis  
37 [X]Other forms of systemic sclerosis  
38 Nail dystrophy due to systemic sclerosis  
39 Polyneuropathy due to systemic sclerosis  
40 Diffuse systemic sclerosis  
41 SS - Systemic sclerosis  
42 CREST syndrome  
43 Plaque morphea  
44 Guttate morphea  
45 Linear morphea  
46 Morphea en coup de sabre  
47 Subcutaneous morphea  
48 Localized morphea  
49 Morphea, plaque form  
50 Generalized morphea

1 Morphea  
2 Generalised morphoea  
3 Morphoea en coup de sabre  
4 Plaque morphoea  
5 Morphoea  
6 Guttate morphoea  
7 Linear morphoea  
8 Localised morphoea  
9 Subcutaneous morphoea  
10 Ulcerative colitis  
11 FH: Ulcerative colitis  
12 Ulcerative (chronic) ileocolitis  
13 Ulcerative proctocolitis NOS  
14 Ulcerative colitis confined to rectum  
15 UC - Ulcerative colitis confined to rectum  
16 Complication due to chronic ulcerative pancolitis  
17 Haemolytic anaemia associated with ulcerative colitis  
18 Ulcerative colitis in remission  
19 Rectal haemorrhage due to chronic ulcerative pancolitis  
20 Mild chronic ulcerative colitis  
21 Chronic ulcerative ileocolitis  
22 Eosinophilic ulcerative colitis  
23 Rectal haemorrhage due to ulcerative colitis  
24 Moderate chronic ulcerative colitis  
25 Severe chronic ulcerative colitis  
26 Fulminant ulcerative colitis  
27 Fistula of intestine due to chronic ulcerative pancolitis  
28 Iritis with ulcerative colitis  
29 Hemolytic anemia associated with ulcerative colitis  
30 Acute ulcerative colitis  
31 Chronic left-sided ulcerative colitis  
32 Secondary autoimmune haemolytic anaemia co-occurrent and due to ulcerative colitis  
33 Left sided ulcerative colitis  
34 Chronic ulcerative pancolitis  
35 Intestinal obstruction due to chronic ulcerative pancolitis  
36 UC - Ulcerative colitis  
37 [RFC] Ulcerative colitis  
38 Exacerbation of ulcerative colitis  
39 Ulcerative pancolitis  
40 Ulcerative ileocolitis  
41 Abscess of intestine co-occurrent and due to ulcerative colitis  
42 Chronic ulcerative enterocolitis  
43 Chronic mild ulcerative colitis  
44 Abscess of intestine co-occurrent and due to chronic ulcerative pancolitis  
45 Ulcerative colitis confined to rectum and sigmoid colon  
46 [X]Other ulcerative colitis  
47 Ulcerative proctocolitis  
48 Complication due to ulcerative colitis  
49 Chronic moderate ulcerative colitis  
50 Ulcerative enterocolitis

- 1
- 2 Intestinal obstruction due to ulcerative colitis
- 3 Secondary autoimmune hemolytic anemia co-occurrent and due to ulcerative colitis
- 4 Chronic ulcerative colitis
- 5 Fistula of intestine due to ulcerative colitis
- 6 Ulcerative colitis and/or proctitis
- 7 Rectal hemorrhage due to ulcerative colitis
- 8 Arthropathy in ulcerative colitis
- 9 Toxic megacolon due to ulcerative colitis
- 10 Rectal hemorrhage due to chronic ulcerative pancolitis
- 11 Ulcerative proctitis
- 12 Rectal hemorrhage due to chronic ulcerative proctitis
- 13 Nonspecific ulcerative proctitis
- 14 Rectal haemorrhage due to chronic ulcerative proctitis
- 15 Abscess of intestine co-occurrent and due to chronic ulcerative proctitis
- 16 Complication due to chronic ulcerative proctitis
- 17 Chronic ulcerative proctitis
- 18 Fistula of intestine due to chronic ulcerative proctitis
- 19 Intestinal obstruction due to chronic ulcerative proctitis
- 20 Chronic ulcerative rectosigmoiditis
- 21 Fistula of large intestine due to chronic ulcerative rectosigmoiditis
- 22 Complication due to chronic ulcerative rectosigmoiditis
- 23 Intestinal obstruction due to chronic ulcerative rectosigmoiditis
- 24 Abscess of intestine co-occurrent and due to chronic ulcerative rectosigmoiditis
- 25 Ulcerative rectosigmoiditis
- 26 Rectal hemorrhage due to chronic ulcerative rectosigmoiditis
- 27 Rectal haemorrhage due to chronic ulcerative rectosigmoiditis
- 28 Fistula of intestine due to inflammatory polyps of colon
- 29 Complication due to colonic inflammatory polyps
- 30 Inflammatory polyps co-occurrent and due to inflammatory bowel disease
- 31 Rectal hemorrhage due to inflammatory polyps of colon
- 32 Abscess of intestine co-occurrent and due to colonic inflammatory polyps
- 33 Rectal haemorrhage due to inflammatory polyps of colon
- 34 Intestinal obstruction due to colonic inflammatory polyps
- 35 Inflammatory polyps of colon
- 36 Proctosigmoiditis
- 37 Chronic ulcerative proctosigmoiditis
- 38 Ulcerative proctosigmoiditis
- 39 Rectosigmoiditis
- 40 Distal colitis
- 41 Management of IBD (inflammatory bowel disease)
- 42 IBD - Inflammatory bowel disease
- 43 Seronegative arthritis secondary to inflammatory bowel disease
- 44 Inflammatory bowel disease
- 45 Idiopathic chronic inflammatory bowel disease
- 46 Iritis with inflammatory bowel disease
- 47 Chronic inflammatory small bowel disease
- 48 Dietary education for inflammatory bowel disease
- 49 Management of inflammatory bowel disease
- 50
- 51
- 52
- 53
- 54
- 55
- 56
- 57
- 58
- 59
- 60

1  
2  
3  
4  
5  
6  
7  
8  
9  
10  
11  
12  
13  
14  
15  
16  
17  
18  
19  
20  
21  
22  
23  
24  
25  
26  
27  
28  
29  
30  
31  
32  
33  
34  
35  
36  
37  
38  
39  
40  
41  
42  
43  
44  
45  
46  
47  
48  
49  
50  
51  
52  
53  
54  
55  
56  
57  
58  
59  
60

For peer review only

1  
2  
3  
4  
5  
6  
7  
8  
9  
10  
11  
12  
13  
14  
15  
16  
17  
18  
19  
20  
21  
22  
23  
24  
25  
26  
27  
28  
29  
30  
31  
32  
33  
34  
35  
36  
37  
38  
39  
40  
41  
42  
43  
44  
45  
46  
47  
48  
49  
50  
51  
52  
53  
54  
55  
56  
57  
58  
59  
60

For peer review only

1  
2  
3  
4  
5  
6  
7  
8  
9  
10  
11  
12  
13  
14  
15  
16  
17  
18  
19  
20  
21  
22  
23  
24  
25  
26  
27  
28  
29  
30  
31  
32  
33  
34  
35  
36  
37  
38  
39  
40  
41  
42  
43  
44  
45  
46  
47  
48  
49  
50  
51  
52  
53  
54  
55  
56  
57  
58  
59  
60

For peer review only

1  
2  
3  
4  
5  
6  
7  
8  
9  
10  
11  
12  
13  
14  
15  
16  
17  
18  
19  
20  
21  
22  
23  
24  
25  
26  
27  
28  
29  
30  
31  
32  
33  
34  
35  
36  
37  
38  
39  
40  
41  
42  
43  
44  
45  
46  
47  
48  
49  
50  
51  
52  
53  
54  
55  
56  
57  
58  
59  
60

For peer review only



1  
2  
3  
4  
5  
6  
7  
8  
9  
10  
11  
12  
13  
14  
15  
16  
17  
18  
19  
20  
21  
22  
23  
24  
25  
26  
27  
28  
29  
30  
31  
32  
33  
34  
35  
36  
37  
38  
39  
40  
41  
42  
43  
44  
45  
46  
47  
48  
49  
50  
51  
52  
53  
54  
55  
56  
57  
58  
59  
60

For peer review only

1  
2  
3  
4  
5  
6  
7  
8  
9  
10  
11  
12  
13  
14  
15  
16  
17  
18  
19  
20  
21  
22  
23  
24  
25  
26  
27  
28  
29  
30  
31  
32  
33  
34  
35  
36  
37  
38  
39  
40  
41  
42  
43  
44  
45  
46  
47  
48  
49  
50  
51  
52  
53  
54  
55  
56  
57  
58  
59  
60

For peer review only

1  
2  
3  
4  
5  
6  
7  
8  
9  
10  
11  
12  
13  
14  
15  
16  
17  
18  
19  
20  
21  
22  
23  
24  
25  
26  
27  
28  
29  
30  
31  
32  
33  
34  
35  
36  
37  
38  
39  
40  
41  
42  
43  
44  
45  
46  
47  
48  
49  
50  
51  
52  
53  
54  
55  
56  
57  
58  
59  
60

For peer review only

1  
2  
3  
4  
5  
6  
7  
8  
9  
10  
11  
12  
13  
14  
15  
16  
17  
18  
19  
20  
21  
22  
23  
24  
25  
26  
27  
28  
29  
30  
31  
32  
33  
34  
35  
36  
37  
38  
39  
40  
41  
42  
43  
44  
45  
46  
47  
48  
49  
50  
51  
52  
53  
54  
55  
56  
57  
58  
59  
60

For peer review only

1  
2  
3  
4  
5  
6  
7  
8  
9  
10  
11  
12  
13  
14  
15  
16  
17  
18  
19  
20  
21  
22  
23  
24  
25  
26  
27  
28  
29  
30  
31  
32  
33  
34  
35  
36  
37  
38  
39  
40  
41  
42  
43  
44  
45  
46  
47  
48  
49  
50  
51  
52  
53  
54  
55  
56  
57  
58  
59  
60

15

For peer review only

1  
2  
3  
4  
5  
6  
7  
8  
9  
10  
11  
12  
13  
14  
15  
16  
17  
18  
19  
20  
21  
22  
23  
24  
25  
26  
27  
28  
29  
30  
31  
32  
33  
34  
35  
36  
37  
38  
39  
40  
41  
42  
43  
44  
45  
46  
47  
48  
49  
50  
51  
52  
53  
54  
55  
56  
57  
58  
59  
60

For peer review only

1  
2  
3  
4  
5  
6  
7  
8  
9  
10  
11  
12  
13  
14  
15  
16  
17  
18  
19  
20  
21  
22  
23  
24  
25  
26  
27  
28  
29  
30  
31  
32  
33  
34  
35  
36  
37  
38  
39  
40  
41  
42  
43  
44  
45  
46  
47  
48  
49  
50  
51  
52  
53  
54  
55  
56  
57  
58  
59  
60

For peer review only

1  
2  
3  
4  
5  
6  
7  
8  
9  
10  
11  
12  
13  
14  
15  
16  
17  
18  
19  
20  
21  
22  
23  
24  
25  
26  
27  
28  
29  
30  
31  
32  
33  
34  
35  
36  
37  
38  
39  
40  
41  
42  
43  
44  
45  
46  
47  
48  
49  
50  
51  
52  
53  
54  
55  
56  
57  
58  
59  
60

For peer review only



1  
2  
3  
4  
5  
6  
7  
8  
9  
10  
11  
12  
13  
14  
15  
16  
17  
18  
19  
20  
21  
22  
23  
24  
25  
26  
27  
28  
29  
30  
31  
32  
33  
34  
35  
36  
37  
38  
39  
40  
41  
42  
43  
44  
45  
46  
47  
48  
49  
50  
51  
52  
53  
54  
55  
56  
57  
58  
59  
60

For peer review only

1  
2  
3  
4  
5  
6  
7  
8  
9  
10  
11  
12  
13  
14  
15  
16  
17  
18  
19  
20  
21  
22  
23  
24  
25  
26  
27  
28  
29  
30  
31  
32  
33  
34  
35  
36  
37  
38  
39  
40  
41  
42  
43  
44  
45  
46  
47  
48  
49  
50  
51  
52  
53  
54  
55  
56  
57  
58  
59  
60

For peer review only

1  
2  
3  
4  
5  
6  
7  
8  
9  
10  
11  
12  
13  
14  
15  
16  
17  
18  
19  
20  
21  
22  
23  
24  
25  
26  
27  
28  
29  
30  
31  
32  
33  
34  
35  
36  
37  
38  
39  
40  
41  
42  
43  
44  
45  
46  
47  
48  
49  
50  
51  
52  
53  
54  
55  
56  
57  
58  
59  
60

For peer review only

1  
2  
3  
4  
5  
6  
7  
8  
9  
10  
11  
12  
13  
14  
15  
16  
17  
18  
19  
20  
21  
22  
23  
24  
25  
26  
27  
28  
29  
30  
31  
32  
33  
34  
35  
36  
37  
38  
39  
40  
41  
42  
43  
44  
45  
46  
47  
48  
49  
50  
51  
52  
53  
54  
55  
56  
57  
58  
59  
60

For peer review only

1  
2  
3  
4  
5  
6  
7  
8  
9  
10  
11  
12  
13  
14  
15  
16  
17  
18  
19  
20  
21  
22  
23  
24  
25  
26  
27  
28  
29  
30  
31  
32  
33  
34  
35  
36  
37  
38  
39  
40  
41  
42  
43  
44  
45  
46  
47  
48  
49  
50  
51  
52  
53  
54  
55  
56  
57  
58  
59  
60

For peer review only

1  
2  
3  
4  
5  
6  
7  
8  
9  
10  
11  
12  
13  
14  
15  
16  
17  
18  
19  
20  
21  
22  
23  
24  
25  
26  
27  
28  
29  
30  
31  
32  
33  
34  
35  
36  
37  
38  
39  
40  
41  
42  
43  
44  
45  
46  
47  
48  
49  
50  
51  
52  
53  
54  
55  
56  
57  
58  
59  
60

For peer review only

1  
2  
3  
4  
5  
6  
7  
8  
9  
10  
11  
12  
13  
14  
15  
16  
17  
18  
19  
20  
21  
22  
23  
24  
25  
26  
27  
28  
29  
30  
31  
32  
33  
34  
35  
36  
37  
38  
39  
40  
41  
42  
43  
44  
45  
46  
47  
48  
49  
50  
51  
52  
53  
54  
55  
56  
57  
58  
59  
60

For peer review only

1  
2  
3  
4  
5  
6  
7  
8  
9  
10  
11  
12  
13  
14  
15  
16  
17  
18  
19  
20  
21  
22  
23  
24  
25  
26  
27  
28  
29  
30  
31  
32  
33  
34  
35  
36  
37  
38  
39  
40  
41  
42  
43  
44  
45  
46  
47  
48  
49  
50  
51  
52  
53  
54  
55  
56  
57  
58  
59  
60

VI

II

VI

III

IV

III

For peer review only



1  
2  
3  
4  
5  
6  
7  
8  
9  
10  
11  
12  
13  
14  
15  
16  
17  
18  
19  
20  
21  
22  
23  
24  
25  
26  
27  
28  
29  
30  
31  
32  
33  
34  
35  
36  
37  
38  
39  
40  
41  
42  
43  
44  
45  
46  
47  
48  
49  
50  
51  
52  
53  
54  
55  
56  
57  
58  
59  
60

IV

II

I

V

For peer review only

1  
2  
3  
4  
5  
6  
7  
8  
9  
10  
11  
12  
13  
14  
15  
16  
17  
18  
19  
20  
21  
22  
23  
24  
25  
26  
27  
28  
29  
30  
31  
32  
33  
34  
35  
36  
37  
38  
39  
40  
41  
42  
43  
44  
45  
46  
47  
48  
49  
50  
51  
52  
53  
54  
55  
56  
57  
58  
59  
60

V

I

For peer review only

| ICD-10 code | Term                                                                     |
|-------------|--------------------------------------------------------------------------|
| D86.0       | Sarcoidosis of lung                                                      |
| D86.1       | Sarcoidosis of lymph nodes                                               |
| D86.2       | Sarcoidosis of lung with sarcoidosis of lymph nodes                      |
| D86.3       | Sarcoidosis of skin                                                      |
| D86.8       | Sarcoidosis of other sites                                               |
| D86.81      | Sarcoid meningitis                                                       |
| D86.82      | Multiple cranial nerve palsies in sarcoidosis                            |
| D86.83      | Sarcoid iridocyclitis                                                    |
| D86.84      | Sarcoid pyelonephritis                                                   |
| D86.85      | Sarcoid myocarditis                                                      |
| D86.86      | Sarcoid arthropathy                                                      |
| D86.87      | Sarcoid myositis                                                         |
| D86.89      | Sarcoidosis of other sites                                               |
| D86.9       | Sarcoidosis, unspecified                                                 |
| M31.5       | Giant cell arteritis with polymyalgia rheumatica                         |
| M31.6       | Other giant cell arteritis                                               |
| M13.0       | Polyarthrititis, unspecified                                             |
| M13.8       | Other specified arthrititis                                              |
| M13.80      | Other specified arthrititis - unspecified site                           |
| M13.81      | Other specified arthrititis, shoulder                                    |
| M13.811     | Other specified arthrititis, right shoulder                              |
| M13.812     | Other specified arthrititis, left shoulder                               |
| M13.819     | Other specified arthrititis, unspecified shoulder                        |
| M13.82      | Other specified arthrititis, elbow                                       |
| M13.821     | Other specified arthrititis, right elbow                                 |
| M13.822     | Other specified arthrititis, left elbow                                  |
| M13.829     | Other specified arthrititis, unspecified elbow                           |
| M13.83      | Other specified arthrititis, wrist                                       |
| M13.831     | Other specified arthrititis, right wrist                                 |
| M13.832     | Other specified arthrititis, left wrist                                  |
| M13.839     | Other specified arthrititis, unspecified wrist                           |
| M13.84      | Other specified arthrititis, hand                                        |
| M13.841     | Other specified arthrititis, right hand                                  |
| M13.842     | Other specified arthrititis, left hand                                   |
| M13.849     | Other specified arthrititis, unspecified hand                            |
| M13.85      | Other specified arthrititis, hip                                         |
| M13.851     | Other specified arthrititis, right hip                                   |
| M13.852     | Other specified arthrititis, left hip                                    |
| M13.859     | Other specified arthrititis, unspecified hip                             |
| M13.86      | Other specified arthrititis, knee                                        |
| M13.861     | Other specified arthrititis, right knee                                  |
| M13.862     | Other specified arthrititis, left knee                                   |
| M13.869     | Other specified arthrititis, unspecified knee                            |
| M13.87      | Other specified arthrititis, ankle and foot                              |
| M13.871     | Other specified arthrititis, right ankle and foot                        |
| M13.872     | Other specified arthrititis, left ankle and foot                         |
| M13.879     | Other specified arthrititis, unspecified ankle and foot                  |
| M13.88      | Other specified arthrititis, unspecified ankle and foot - other site     |
| M13.89      | Other specified arthrititis, unspecified ankle and foot - multiple sites |

|    |        |                                                                    |
|----|--------|--------------------------------------------------------------------|
| 1  |        |                                                                    |
| 2  | G35    | Multiple sclerosis                                                 |
| 3  | K75.4  | Autoimmune hepatitis                                               |
| 4  | K71.5  | Toxic liver disease with chronic active hepatitis                  |
| 5  | K50    | Crohn disease [regional enteritis]                                 |
| 6  | K50.0  | Crohn disease of small intestine                                   |
| 7  | K50.1  | Crohn disease of large intestine                                   |
| 8  | K50.8  | Other Crohn disease                                                |
| 9  | K50.9  | Crohn disease, unspecified                                         |
| 10 | E10    | Type 1 diabetes mellitus                                           |
| 11 | E10.0  | Type 1 diabetes mellitus with coma                                 |
| 12 | E10.1  | Type 1 diabetes mellitus with ketoacidosis                         |
| 13 | E10.2  | Type 1 diabetes mellitus with renal complications                  |
| 14 | E10.3  | Type 1 diabetes mellitus with ophthalmic complications             |
| 15 | E10.4  | Type 1 diabetes mellitus with neurological complications           |
| 16 | E10.5  | Type 1 diabetes mellitus with peripheral circulatory complications |
| 17 | E10.6  | Type 1 diabetes mellitus with other specified complications        |
| 18 | E10.7  | Type 1 diabetes mellitus with multiple complications               |
| 19 | E10.8  | Type 1 diabetes mellitus with unspecified complications            |
| 20 | E10.9  | Type 1 diabetes mellitus without complications                     |
| 21 | L40.0  | Psoriasis vulgaris                                                 |
| 22 | L40.5  | Arthropathic psoriasis                                             |
| 23 | M07.0  | Distal interphalangeal psoriatic arthropathy                       |
| 24 | M07.00 | Distal interphalangeal psoriatic arthropathy: Multiple sites       |
| 25 | M07.04 | Distal interphalangeal psoriatic arthropathy: Hand                 |
| 26 | M07.07 | Distal interphalangeal psoriatic arthropathy: Ankle and foot       |
| 27 | M07.09 | Distal interphalangeal psoriatic arthropathy: Site unspecified     |
| 28 | M07.1  | Arthritis mutilans                                                 |
| 29 | M07.10 | Arthritis mutilans: Multiple sites                                 |
| 30 | M07.11 | Arthritis mutilans: Shoulder region                                |
| 31 | M07.12 | Arthritis mutilans: Upper arm                                      |
| 32 | M07.13 | Arthritis mutilans: Forearm                                        |
| 33 | M07.14 | Arthritis mutilans: Hand                                           |
| 34 | M07.15 | Arthritis mutilans: Pelvic region and thigh                        |
| 35 | M07.16 | Arthritis mutilans: Lower leg                                      |
| 36 | M07.17 | Arthritis mutilans: Ankle and foot                                 |
| 37 | M07.18 | Arthritis mutilans: Other                                          |
| 38 | M07.19 | Arthritis mutilans: Site unspecified                               |
| 39 | M07.2  | Psoriatic spondylitis                                              |
| 40 | M07.20 | Psoriatic spondylitis: Multiple sites                              |
| 41 | M07.21 | Psoriatic spondylitis: Shoulder region                             |
| 42 | M07.22 | Psoriatic spondylitis: Upper arm                                   |
| 43 | M07.23 | Psoriatic spondylitis: Forearm                                     |
| 44 | M07.24 | Psoriatic spondylitis: Hand                                        |
| 45 | M07.25 | Psoriatic spondylitis: Pelvic region and thigh                     |
| 46 | M07.26 | Psoriatic spondylitis: Lower leg                                   |
| 47 | M07.27 | Psoriatic spondylitis: Ankle and foot                              |
| 48 | M07.28 | Psoriatic spondylitis: Other                                       |
| 49 | M07.29 | Psoriatic spondylitis: Site unspecified                            |
| 50 | M07.3  | Other psoriatic arthropathies                                      |
| 51 | M07.30 | Other psoriatic arthropathies: Multiple sites                      |

|    |        |                                                          |
|----|--------|----------------------------------------------------------|
| 1  |        |                                                          |
| 2  | M07.31 | Other psoriatic arthropathies: Shoulder region           |
| 3  | M07.32 | Other psoriatic arthropathies: Upper arm                 |
| 4  | M07.33 | Other psoriatic arthropathies: Forearm                   |
| 5  | M07.34 | Other psoriatic arthropathies: Hand                      |
| 6  | M07.35 | Other psoriatic arthropathies: Pelvic region and thigh   |
| 7  | M07.36 | Other psoriatic arthropathies: Lower leg                 |
| 8  | M07.37 | Other psoriatic arthropathies: Ankle and foot            |
| 9  | M07.38 | Other psoriatic arthropathies: Other                     |
| 10 | M07.39 | Other psoriatic arthropathies: Site unspecified          |
| 11 |        |                                                          |
| 12 | M45    | Ankylosing spondylitis                                   |
| 13 | M45.0  | Ankylosing spondylitis, Multiple sites in spine          |
| 14 | M45.1  | Ankylosing spondylitis, Occipito-atlanto-axial region    |
| 15 | M45.2  | Ankylosing spondylitis, Cervical region                  |
| 16 | M45.3  | Ankylosing spondylitis, Cervicothoracic region           |
| 17 | M45.4  | Ankylosing spondylitis, Thoracic region                  |
| 18 | M45.5  | Ankylosing spondylitis, Thoracolumbar region             |
| 19 | M45.6  | Ankylosing spondylitis, Lumbar region                    |
| 20 | M45.7  | Ankylosing spondylitis, Lumbosacral region               |
| 21 | M45.8  | Ankylosing spondylitis, Sacral and sacrococcygeal region |
| 22 | M45.9  | Ankylosing spondylitis, Site unspecified                 |
| 23 |        |                                                          |
| 24 | M05    | Seropositive rheumatoid arthritis                        |
| 25 | M05.0  | Felty syndrome                                           |
| 26 | M05.00 | Felty syndrome: Multiple sites                           |
| 27 | M05.01 | Felty syndrome: Shoulder region                          |
| 28 | M05.02 | Felty syndrome: Upper arm                                |
| 29 | M05.03 | Felty syndrome: Forearm                                  |
| 30 | M05.04 | Felty syndrome: Hand                                     |
| 31 | M05.05 | Felty syndrome: Pelvic region and thigh                  |
| 32 | M05.06 | Felty syndrome: Lower leg                                |
| 33 | M05.07 | Felty syndrome: Ankle and foot                           |
| 34 | M05.08 | Felty syndrome: Other                                    |
| 35 | M05.09 | Felty syndrome: Site unspecified                         |
| 36 |        |                                                          |
| 37 | M05.1  | Rheumatoid lung disease                                  |
| 38 | M05.10 | Rheumatoid lung disease: Multiple sites                  |
| 39 | M05.11 | Rheumatoid lung disease: Shoulder region                 |
| 40 | M05.12 | Rheumatoid lung disease: Upper arm                       |
| 41 | M05.13 | Rheumatoid lung disease: Forearm                         |
| 42 | M05.14 | Rheumatoid lung disease: Hand                            |
| 43 | M05.15 | Rheumatoid lung disease: Pelvic region and thigh         |
| 44 | M05.16 | Rheumatoid lung disease: Lower leg                       |
| 45 | M05.17 | Rheumatoid lung disease: Ankle and foot                  |
| 46 | M05.18 | Rheumatoid lung disease: Other                           |
| 47 | M05.19 | Rheumatoid lung disease: Site unspecified                |
| 48 |        |                                                          |
| 49 | M05.2  | Rheumatoid vasculitis                                    |
| 50 | M05.20 | Rheumatoid vasculitis: Multiple sites                    |
| 51 | M05.21 | Rheumatoid vasculitis: Shoulder region                   |
| 52 | M05.22 | Rheumatoid vasculitis: Upper arm                         |
| 53 | M05.23 | Rheumatoid vasculitis: Forearm                           |
| 54 | M05.24 | Rheumatoid vasculitis: Hand                              |
| 55 | M05.25 | Rheumatoid vasculitis: Pelvic region and thigh           |

|    |        |                                                                                            |
|----|--------|--------------------------------------------------------------------------------------------|
| 1  |        |                                                                                            |
| 2  | M05.26 | Rheumatoid vasculitis: Lower leg                                                           |
| 3  | M05.27 | Rheumatoid vasculitis: Ankle and foot                                                      |
| 4  | M05.28 | Rheumatoid vasculitis: Other                                                               |
| 5  | M05.29 | Rheumatoid vasculitis: Site unspecified                                                    |
| 6  | M05.3  | Rheumatoid arthritis with involvement of other organs and systems                          |
| 7  | M05.30 | Rheumatoid arthritis with involvement of other organs and systems: Multiple sites          |
| 8  | M05.31 | Rheumatoid arthritis with involvement of other organs and systems: Shoulder region         |
| 9  | M05.32 | Rheumatoid arthritis with involvement of other organs and systems: Upper arm               |
| 10 | M05.33 | Rheumatoid arthritis with involvement of other organs and systems: Forearm                 |
| 11 | M05.34 | Rheumatoid arthritis with involvement of other organs and systems: Hand                    |
| 12 | M05.35 | Rheumatoid arthritis with involvement of other organs and systems: Pelvic region and thigh |
| 13 | M05.36 | Rheumatoid arthritis with involvement of other organs and systems: Lower leg               |
| 14 | M05.37 | Rheumatoid arthritis with involvement of other organs and systems: Ankle and foot          |
| 15 | M05.38 | Rheumatoid arthritis with involvement of other organs and systems: Other                   |
| 16 | M05.39 | Rheumatoid arthritis with involvement of other organs and systems: Site unspecified        |
| 17 | M05.8  | Other seropositive rheumatoid arthritis                                                    |
| 18 | M05.80 | Other seropositive rheumatoid arthritis: Multiple sites                                    |
| 19 | M05.81 | Other seropositive rheumatoid arthritis: Shoulder region                                   |
| 20 | M05.82 | Other seropositive rheumatoid arthritis: Upper arm                                         |
| 21 | M05.83 | Other seropositive rheumatoid arthritis: Forearm                                           |
| 22 | M05.84 | Other seropositive rheumatoid arthritis: Hand                                              |
| 23 | M05.85 | Other seropositive rheumatoid arthritis: Pelvic region and thigh                           |
| 24 | M05.86 | Other seropositive rheumatoid arthritis: Lower leg                                         |
| 25 | M05.87 | Other seropositive rheumatoid arthritis: Ankle and foot                                    |
| 26 | M05.88 | Other seropositive rheumatoid arthritis: Other                                             |
| 27 | M05.89 | Other seropositive rheumatoid arthritis: Site unspecified                                  |
| 28 | M05.9  | Seropositive rheumatoid arthritis, unspecified                                             |
| 29 | M05.90 | Seropositive rheumatoid arthritis, unspecified: Multiple sites                             |
| 30 | M05.91 | Seropositive rheumatoid arthritis, unspecified: Shoulder region                            |
| 31 | M05.92 | Seropositive rheumatoid arthritis, unspecified: Upper arm                                  |
| 32 | M05.93 | Seropositive rheumatoid arthritis, unspecified: Forearm                                    |
| 33 | M05.94 | Seropositive rheumatoid arthritis, unspecified: Hand                                       |
| 34 | M05.95 | Seropositive rheumatoid arthritis, unspecified: Pelvic region and thigh                    |
| 35 | M05.96 | Seropositive rheumatoid arthritis, unspecified: Lower leg                                  |
| 36 | M05.97 | Seropositive rheumatoid arthritis, unspecified: Ankle and foot                             |
| 37 | M05.98 | Seropositive rheumatoid arthritis, unspecified: Other                                      |
| 38 | M05.99 | Seropositive rheumatoid arthritis, unspecified: Site unspecified                           |
| 39 | M06    | Other rheumatoid arthritis                                                                 |
| 40 | M06.0  | Seronegative rheumatoid arthritis                                                          |
| 41 | M06.00 | Seronegative rheumatoid arthritis: Multiple sites                                          |
| 42 | M06.01 | Seronegative rheumatoid arthritis: Shoulder region                                         |
| 43 | M06.02 | Seronegative rheumatoid arthritis: Upper arm                                               |
| 44 | M06.03 | Seronegative rheumatoid arthritis: Forearm                                                 |
| 45 | M06.04 | Seronegative rheumatoid arthritis: Hand                                                    |
| 46 | M06.05 | Seronegative rheumatoid arthritis: Pelvic region and thigh                                 |
| 47 | M06.06 | Seronegative rheumatoid arthritis: Lower leg                                               |
| 48 | M06.07 | Seronegative rheumatoid arthritis: Ankle and foot                                          |
| 49 | M06.08 | Seronegative rheumatoid arthritis: Other                                                   |
| 50 | M06.09 | Seronegative rheumatoid arthritis: Site unspecified                                        |
| 51 | M06.1  | Adult-onset Still disease                                                                  |

|    |        |                                                               |
|----|--------|---------------------------------------------------------------|
| 1  |        |                                                               |
| 2  | M06.10 | Adult-onset Still disease: Multiple sites                     |
| 3  | M06.11 | Adult-onset Still disease: Shoulder region                    |
| 4  | M06.12 | Adult-onset Still disease: Upper arm                          |
| 5  | M06.13 | Adult-onset Still disease: Forearm                            |
| 6  | M06.14 | Adult-onset Still disease: Hand                               |
| 7  |        |                                                               |
| 8  | M06.15 | Adult-onset Still disease: Pelvic region and thigh            |
| 9  | M06.16 | Adult-onset Still disease: Lower leg                          |
| 10 | M06.17 | Adult-onset Still disease: Ankle and foot                     |
| 11 | M06.18 | Adult-onset Still disease: Other                              |
| 12 |        |                                                               |
| 13 | M06.19 | Adult-onset Still disease: Site unspecified                   |
| 14 | M06.2  | Rheumatoid bursitis                                           |
| 15 | M06.20 | Rheumatoid bursitis: Multiple sites                           |
| 16 | M06.21 | Rheumatoid bursitis: Shoulder region                          |
| 17 | M06.22 | Rheumatoid bursitis: Upper arm                                |
| 18 | M06.23 | Rheumatoid bursitis: Forearm                                  |
| 19 | M06.24 | Rheumatoid bursitis: Hand                                     |
| 20 | M06.25 | Rheumatoid bursitis: Pelvic region and thigh                  |
| 21 | M06.26 | Rheumatoid bursitis: Lower leg                                |
| 22 | M06.27 | Rheumatoid bursitis: Ankle and foot                           |
| 23 |        |                                                               |
| 24 | M06.28 | Rheumatoid bursitis: Other                                    |
| 25 | M06.29 | Rheumatoid bursitis: Site unspecified                         |
| 26 |        |                                                               |
| 27 | M06.3  | Rheumatoid nodule                                             |
| 28 | M06.30 | Rheumatoid nodule: Multiple sites                             |
| 29 | M06.31 | Rheumatoid nodule: Shoulder region                            |
| 30 | M06.32 | Rheumatoid nodule: Upper arm                                  |
| 31 | M06.33 | Rheumatoid nodule: Forearm                                    |
| 32 | M06.34 | Rheumatoid nodule: Hand                                       |
| 33 | M06.35 | Rheumatoid nodule: Pelvic region and thigh                    |
| 34 | M06.36 | Rheumatoid nodule: Lower leg                                  |
| 35 | M06.37 | Rheumatoid nodule: Ankle and foot                             |
| 36 |        |                                                               |
| 37 | M06.38 | Rheumatoid nodule: Other                                      |
| 38 | M06.39 | Rheumatoid nodule: Site unspecified                           |
| 39 |        |                                                               |
| 40 | M06.4  | Inflammatory polyarthropathy                                  |
| 41 | M06.40 | Inflammatory polyarthropathy: Multiple sites                  |
| 42 | M06.41 | Inflammatory polyarthropathy: Shoulder region                 |
| 43 | M06.42 | Inflammatory polyarthropathy: Upper arm                       |
| 44 | M06.43 | Inflammatory polyarthropathy: Forearm                         |
| 45 | M06.44 | Inflammatory polyarthropathy: Hand                            |
| 46 | M06.45 | Inflammatory polyarthropathy: Pelvic region and thigh         |
| 47 | M06.46 | Inflammatory polyarthropathy: Lower leg                       |
| 48 | M06.47 | Inflammatory polyarthropathy: Ankle and foot                  |
| 49 | M06.48 | Inflammatory polyarthropathy: Other                           |
| 50 | M06.49 | Inflammatory polyarthropathy: Site unspecified                |
| 51 |        |                                                               |
| 52 | M06.8  | Other specified rheumatoid arthritis                          |
| 53 | M06.80 | Other specified rheumatoid arthritis: Multiple sites          |
| 54 | M06.81 | Other specified rheumatoid arthritis: Shoulder region         |
| 55 | M06.82 | Other specified rheumatoid arthritis: Upper arm               |
| 56 | M06.83 | Other specified rheumatoid arthritis: Forearm                 |
| 57 | M06.84 | Other specified rheumatoid arthritis: Hand                    |
| 58 | M06.85 | Other specified rheumatoid arthritis: Pelvic region and thigh |
| 59 |        |                                                               |
| 60 |        |                                                               |

|    |        |                                                               |
|----|--------|---------------------------------------------------------------|
| 1  |        |                                                               |
| 2  | M06.86 | Other specified rheumatoid arthritis: Lower leg               |
| 3  | M06.87 | Other specified rheumatoid arthritis: Ankle and foot          |
| 4  | M06.88 | Other specified rheumatoid arthritis: Other                   |
| 5  | M06.89 | Other specified rheumatoid arthritis: Site unspecified        |
| 6  | M06.9  | Rheumatoid arthritis, unspecified                             |
| 7  |        |                                                               |
| 8  | M06.90 | Rheumatoid arthritis, unspecified: Multiple sites             |
| 9  | M06.91 | Rheumatoid arthritis, unspecified: Shoulder region            |
| 10 | M06.92 | Rheumatoid arthritis, unspecified: Upper arm                  |
| 11 | M06.93 | Rheumatoid arthritis, unspecified: Forearm                    |
| 12 |        |                                                               |
| 13 | M06.94 | Rheumatoid arthritis, unspecified: Hand                       |
| 14 | M06.95 | Rheumatoid arthritis, unspecified: Pelvic region and thigh    |
| 15 | M06.96 | Rheumatoid arthritis, unspecified: Lower leg                  |
| 16 | M06.97 | Rheumatoid arthritis, unspecified: Ankle and foot             |
| 17 | M06.98 | Rheumatoid arthritis, unspecified: Other                      |
| 18 |        |                                                               |
| 19 | M06.99 | Rheumatoid arthritis, unspecified: Site unspecified           |
| 20 | M32    | Systemic lupus erythematosus                                  |
| 21 | M32.0  | Drug-induced systemic lupus erythematosus                     |
| 22 | M32.1  | Systemic lupus erythematosus with organ or system involvement |
| 23 |        |                                                               |
| 24 | M32.8  | Other forms of systemic lupus erythematosus                   |
| 25 | M32.9  | Systemic lupus erythematosus, unspecified                     |
| 26 | L93    | Lupus erythematosus                                           |
| 27 | M34    | Systemic sclerosis                                            |
| 28 | M34.0  | Progressive systemic sclerosis                                |
| 29 | M34.1  | CR(E)ST syndrome                                              |
| 30 | M34.2  | Systemic sclerosis induced by drugs and chemicals             |
| 31 |        |                                                               |
| 32 | M34.8  | Other forms of systemic sclerosis                             |
| 33 | M34.9  | Systemic sclerosis, unspecified                               |
| 34 | L94.0  | Localized scleroderma [morphea]                               |
| 35 | L94.1  | Linear scleroderma                                            |
| 36 |        |                                                               |
| 37 | K51    | Ulcerative colitis                                            |
| 38 | K51.0  | Ulcerative (chronic) pancolitis                               |
| 39 | K51.2  | Ulcerative (chronic) proctitis                                |
| 40 | K51.3  | Ulcerative (chronic) rectosigmoiditis                         |
| 41 | K51.4  | Inflammatory polyps                                           |
| 42 |        |                                                               |
| 43 | K51.5  | Left sided colitis                                            |
| 44 | K51.8  | Other ulcerative colitis                                      |
| 45 | K51.9  | Ulcerative colitis, unspecified                               |
| 46 | M07.5  | Arthropathy in ulcerative colitis                             |
| 47 |        |                                                               |
| 48 |        |                                                               |
| 49 |        |                                                               |
| 50 |        |                                                               |
| 51 |        |                                                               |
| 52 |        |                                                               |
| 53 |        |                                                               |
| 54 |        |                                                               |
| 55 |        |                                                               |
| 56 |        |                                                               |
| 57 |        |                                                               |
| 58 |        |                                                               |
| 59 |        |                                                               |
| 60 |        |                                                               |



1  
2  
3  
4  
5  
6  
7  
8  
9  
10  
11  
12  
13  
14  
15  
16  
17  
18  
19  
20  
21  
22  
23  
24  
25  
26  
27  
28  
29  
30  
31  
32  
33  
34  
35  
36  
37  
38  
39  
40  
41  
42  
43  
44  
45  
46  
47  
48  
49  
50  
51  
52  
53  
54  
55  
56  
57  
58  
59  
60

For peer review only

1  
2  
3  
4  
5  
6  
7  
8  
9  
10  
11  
12  
13  
14  
15  
16  
17  
18  
19  
20  
21  
22  
23  
24  
25  
26  
27  
28  
29  
30  
31  
32  
33  
34  
35  
36  
37  
38  
39  
40  
41  
42  
43  
44  
45  
46  
47  
48  
49  
50  
51  
52  
53  
54  
55  
56  
57  
58  
59  
60

For peer review only

1  
2  
3  
4  
5  
6  
7  
8  
9  
10  
11  
12  
13  
14  
15  
16  
17  
18  
19  
20  
21  
22  
23  
24  
25  
26  
27  
28  
29  
30  
31  
32  
33  
34  
35  
36  
37  
38  
39  
40  
41  
42  
43  
44  
45  
46  
47  
48  
49  
50  
51  
52  
53  
54  
55  
56  
57  
58  
59  
60

For peer review only

1  
2  
3  
4  
5  
6  
7  
8  
9  
10  
11  
12  
13  
14  
15  
16  
17  
18  
19  
20  
21  
22  
23  
24  
25  
26  
27  
28  
29  
30  
31  
32  
33  
34  
35  
36  
37  
38  
39  
40  
41  
42  
43  
44  
45  
46  
47  
48  
49  
50  
51  
52  
53  
54  
55  
56  
57  
58  
59  
60

gh

For peer review only

1  
2 Procodeid  
3 1636041000033113  
4 1636141000033112  
5 1673741000033119  
6 1673841000033112  
7  
8 9301041000033111  
9 9301141000033110  
10 12203741000033111  
11 12355041000033113  
12 12355141000033112  
13 12377241000033112  
14  
15 390141000033111  
16 390241000033116  
17 390341000033114  
18 395241000033113  
19 523041000033113  
20 10217041000033110  
21 391941000033119  
22 392041000033113  
23 395141000033118  
24 522941000033115  
25 10266941000033113  
26 10267041000033114  
27 10267641000033115  
28 10267741000033112  
29 13810341000033115  
30 13810441000033114  
31 13942341000033116  
32 13942441000033110  
33 11667041000033118  
34 11667141000033119  
35 11667241000033114  
36 11667341000033116  
37 5317941000033110  
38 5318041000033113  
39 5318141000033112  
40 5318441000033116  
41 9301541000033118  
42 9301741000033114  
43 12604241000033117  
44 12604341000033110  
45 5318341000033110  
46 5318241000033117  
47 12390041000033112  
48 12390141000033111  
49 12390241000033116  
50 12390441000033115  
51 12390541000033119  
52 12390741000033110  
53 12390841000033117

For peer review only

1  
2 6445041000033116  
3 6445141000033117  
4 6445241000033112  
5 13751641000033110  
6 2994741000033113  
7 2994841000033115  
8 4042541000033115  
9 4042641000033119  
10 6467741000033115  
11 6467841000033113  
12 11692941000033118  
13 11693041000033111  
14 11693141000033110  
15 11693241000033115  
16 12512241000033119  
17 12512541000033117  
18 12683741000033114  
19 12685541000033117  
20 12712841000033116  
21 12712941000033112  
22 12873041000033113  
23 12873141000033112  
24 12873241000033117  
25 12873341000033110  
26 12873441000033116  
27 12873541000033115  
28 12873641000033119  
29 12873741000033111  
30 13479441000033116  
31 13479841000033118  
32 13480141000033112  
33 13417341000033112  
34 13417441000033118  
35 11781041000033119  
36 11780941000033112  
37 8298941000033110  
38 5325241000033117  
39 2147041000033113  
40 2147141000033112  
41 3290341000033114  
42 3290441000033115  
43 3995941000033115  
44 3996041000033113  
45 3996141000033112  
46 4012441000033113  
47 4012541000033114  
48 5293341000033111  
49 5293541000033116  
50 6515841000033111  
51 6515941000033115

For peer review only

1  
2 11242141000033114  
3 11242241000033119  
4 12346841000033114  
5 12355441000033116  
6 12355541000033115  
7 12355641000033119  
8 12410041000033119  
9 12410141000033115  
10 5989541000033118  
11 5989641000033117  
12 9069241000033119  
13 12378941000033116  
14 12379041000033113  
15 12379141000033112  
16 1916141000033115  
17 1916241000033110  
18 10213341000033118  
19 10229141000033111  
20 11749341000033114  
21 12886741000033110  
22 13443641000033118  
23 13443741000033110  
24 13443841000033117  
25 13443941000033113  
26 4937241000033111  
27 4937341000033118  
28 5706041000033114  
29 5706141000033113  
30 10644841000033118  
31 10644941000033114  
32 11898541000033118  
33 11898641000033117  
34 9301241000033115  
35 9301441000033119  
36 13510241000033112  
37 13510341000033119  
38 13510541000033114  
39 4164341000033119  
40 4164441000033113  
41 8233841000033117  
42 8233941000033113  
43 10358641000033117  
44 10358741000033114  
45 13058741000033112  
46 13058841000033119  
47 13058941000033110  
48 12207541000033111  
49 12207641000033112  
50 12352141000033118  
51 12352241000033113

For peer review only

1  
2 12205341000033114  
3 12205541000033119  
4 12635441000033113  
5 12635541000033114  
6 13426841000033112  
7 13426941000033116  
8 13452341000033115  
9 13452441000033114  
10 13911341000033115  
11 371941000033113  
12 2372541000033113  
13 2372141000033116  
14 369541000033110  
15 372041000033119  
16 372141000033115  
17 372241000033110  
18 418341000033119  
19 430841000033118  
20 431841000033111  
21 431941000033115  
22 859341000033110  
23 3978741000033118  
24 5506241000033117  
25 5900641000033111  
26 5900741000033119  
27 5900841000033112  
28 5900941000033116  
29 6137741000033111  
30 6137841000033118  
31 12398241000033119  
32 12526841000033110  
33 12575941000033114  
34 1601041000033111  
35 1656541000033119  
36 2146441000033119  
37 2146541000033118  
38 3345441000033112  
39 3345541000033113  
40 6512741000033110  
41 8956141000033115  
42 9108241000033115  
43 9122441000033114  
44 9290141000033113  
45 10213841000033110  
46 11072141000033115  
47 11072241000033110  
48 11072341000033117  
49 12389541000033113  
50 13948241000033112  
51 13948341000033119

For peer review only



1  
2 12568941000033112  
3 12568841000033116  
4 12568741000033114  
5 12568641000033117  
6 12389741000033117  
7 12389641000033114  
8 422241000033116  
9 423441000033112  
10 423541000033113  
11 429841000033113  
12 2958641000033119  
13 2760841000033115  
14 2760741000033113  
15 5989241000033115  
16 6062941000033110  
17 9870741000033114  
18 9872041000033112  
19 740241000033111  
20 742241000033110  
21 744541000033116  
22 744641000033115  
23 744741000033112  
24 1830141000033115  
25 2149441000033113  
26 2623741000033116  
27 8141941000033110  
28 8142041000033116  
29 8142141000033117  
30 8142241000033112  
31 12633241000033111  
32 12633341000033118  
33 12633541000033113  
34 12633441000033112  
35 12633641000033114  
36 12633741000033117  
37 12633841000033110  
38 12633941000033119  
39 12890041000033114  
40 13010241000033114  
41 13010341000033116  
42 13897441000033114  
43 13897541000033110  
44 13897641000033111  
45 13915741000033116  
46 13915541000033112  
47 13915841000033114  
48 738041000033118  
49 420641000033117  
50 420741000033114  
51 423141000033116

For peer review only

1  
2 878641000033113  
3 880141000033114  
4 880241000033119  
5 889441000033114  
6 889541000033110  
7 889641000033111  
8 889741000033119  
9 889841000033112  
10 898441000033115  
11 898541000033119  
12 899641000033110  
13 899741000033118  
14 899841000033111  
15 903141000033113  
16 904141000033111  
17 904241000033116  
18 1357541000033112  
19 1361441000033110  
20 1361541000033111  
21 1361641000033112  
22 1361741000033115  
23 879941000033111  
24 879841000033115  
25 880041000033110  
26 887041000033114  
27 886141000033111  
28 431541000033114  
29 431641000033110  
30 1114241000033116  
31 1114341000033114  
32 1126941000033113  
33 1127041000033114  
34 1130741000033110  
35 1131741000033117  
36 1131841000033110  
37 1131941000033119  
38 8494441000033110  
39 8494541000033111  
40 9119141000033118  
41 10212141000033111  
42 10212341000033114  
43 10212441000033115  
44 10212541000033119  
45 10212641000033118  
46 10212741000033110  
47 10212941000033113  
48 10266841000033117  
49 10494341000033117  
50 11507841000033115  
51 11664841000033116

For peer review only

1  
2 13747341000033111  
3 8046741000033113  
4 2918641000033113  
5 2859741000033112  
6 2744441000033118  
7 2710641000033117  
8 2668541000033114  
9 2623541000033112  
10 2612741000033119  
11 2612641000033111  
12 1668541000033113  
13 1129341000033115  
14 1127341000033111  
15 1127141000033113  
16 1126741000033110  
17 1126841000033117  
18 1114941000033113  
19 1114741000033110  
20 1114841000033117  
21 1114641000033118  
22 1113941000033110  
23 1113741000033112  
24 909541000033118  
25 2637441000033119  
26 1119241000033115  
27 1114541000033119  
28 422841000033117  
29 5990141000033115  
30 5990241000033110  
31 5990341000033117  
32 2509541000033113  
33 2509741000033117  
34 2509341000033118  
35 10988941000033111  
36 1115441000033116  
37 1119141000033110  
38 1115041000033113  
39 1128341000033110  
40 1130841000033117  
41 1132041000033113  
42 1132141000033112  
43 220041000033112  
44 234041000033115  
45 946841000033118  
46 2736441000033112  
47 2736541000033113  
48 6035941000033111  
49 6036041000033118  
50 6036241000033114  
51 944841000033112

For peer review only

1  
2 6036341000033116  
3 1779841000033117  
4 1779941000033113  
5 12405341000033113  
6 12405241000033115  
7  
8 3178841000033114  
9 3178741000033116  
10 3178641000033113  
11 3178541000033112  
12  
13 1111741000033113  
14 1111841000033115  
15 1403941000033113  
16 1404041000033110  
17 2099141000033117  
18 2099241000033112  
19  
20 3152241000033110  
21 3216341000033110  
22 4178541000033110  
23 4178641000033111  
24 4178741000033119  
25 4178841000033112  
26 4178941000033116  
27 4179041000033113  
28  
29 5131741000033116  
30 5131841000033114  
31 5413541000033116  
32 5413641000033115  
33 5413741000033112  
34 5413841000033119  
35  
36 5992741000033115  
37 5992841000033113  
38 5992941000033117  
39 5999541000033119  
40  
41 6124541000033111  
42 6124641000033112  
43 6386241000033116  
44 6386141000033111  
45 6386341000033114  
46 6442741000033110  
47 6442841000033117  
48  
49 10209841000033111  
50 10209941000033115  
51 10210141000033110  
52 10210241000033115  
53 10210341000033113  
54 10210541000033118  
55 10253441000033117  
56 10253541000033116  
57 10253741000033112  
58  
59 10253641000033115  
60

For peer review only

1  
2 13317541000033113  
3 13317641000033114  
4 13317741000033117  
5 13317841000033110  
6 13317941000033119  
7  
8 13318041000033116  
9 97241000033118  
10 98641000033119  
11 98741000033111  
12  
13 752841000033111  
14 754441000033119  
15 755441000033115  
16 755741000033110  
17 3050441000033115  
18 3151941000033113  
19  
20 3188041000033113  
21 3216241000033117  
22 5891341000033119  
23 5989441000033119  
24 6066841000033115  
25 8493941000033115  
26 9702441000033111  
27 9852141000033113  
28 98841000033118  
29 755241000033116  
30 902041000033117  
31 1145041000033118  
32 2873741000033112  
33 3134741000033111  
34 3282641000033115  
35 8265941000033118  
36 9158841000033114  
37 10801841000033117  
38 11807941000033110  
39 13146841000033110  
40 870241000033113  
41 870341000033115  
42 878841000033114  
43 879041000033110  
44 879141000033114  
45 879241000033119  
46 879341000033112  
47 879441000033118  
48 900241000033114  
49 902541000033110  
50 2056141000033119  
51 2056241000033114  
52 2668441000033113  
53 2873641000033115  
54 2924041000033115

For peer review only

1  
2 3835441000033114  
3 3836441000033117  
4 3868841000033111  
5 3869641000033118  
6 3869741000033110  
7 3869841000033117  
8 3869941000033113  
9 3870041000033114  
10 3870141000033113  
11 3870241000033118  
12 3870341000033111  
13 3870441000033117  
14 3870541000033116  
15 3906941000033111  
16 4020841000033119  
17 5078841000033112  
18 5079041000033113  
19 5079141000033112  
20 5079241000033117  
21 5079341000033110  
22 5079641000033119  
23 5079741000033111  
24 5079941000033114  
25 5080041000033113  
26 5080141000033112  
27 6037041000033116  
28 6037141000033117  
29 6071841000033115  
30 6377141000033119  
31 6377241000033114  
32 6377341000033116  
33 6380841000033115  
34 6380941000033111  
35 6381041000033118  
36 6381141000033119  
37 6526541000033110  
38 6526641000033111  
39 6526741000033119  
40 6526841000033112  
41 8112741000033111  
42 9290641000033115  
43 9290741000033112  
44 9290841000033119  
45 9290941000033110  
46 9291041000033117  
47 9291141000033118  
48 9291241000033113  
49 9291341000033115  
50 9291441000033114  
51 9291541000033110

For peer review only

1  
2 9291641000033111  
3 9291741000033119  
4 9291841000033112  
5 9291941000033116  
6 9292041000033110  
7 9292141000033114  
8 9292241000033119  
9 9292341000033112  
10 9292441000033118  
11 9292541000033117  
12 10645841000033119  
13 11032541000033114  
14 11032641000033110  
15 11032741000033118  
16 11032841000033111  
17 11032941000033115  
18 11033041000033113  
19 11033141000033112  
20 11033241000033117  
21 11033341000033110  
22 11033541000033115  
23 12189841000033119  
24 12189941000033110  
25 12190141000033118  
26 12190241000033113  
27 12190341000033115  
28 12190441000033114  
29 12190541000033110  
30 12190641000033111  
31 12190741000033119  
32 12190841000033112  
33 12190941000033116  
34 12191041000033114  
35 12191141000033113  
36 12191241000033118  
37 12191341000033111  
38 12191441000033117  
39 12396841000033119  
40 12396941000033110  
41 12397041000033111  
42 12397141000033110  
43 12397241000033115  
44 12397341000033113  
45 12397441000033119  
46 12397541000033118  
47 12397741000033114  
48 12422441000033115  
49 13150141000033115  
50 13150241000033110  
51 13150341000033117

For peer review only

1  
2 13150441000033111  
3 13150541000033112  
4 13150641000033113  
5 13150741000033116  
6 13150841000033114  
7  
8 878941000033118  
9 884741000033118  
10 884841000033111  
11 884941000033115  
12  
13 904041000033112  
14 958341000033114  
15 958441000033115  
16 958541000033119  
17 964241000033115  
18  
19 1221841000033110  
20 1221941000033119  
21 1222041000033113  
22 1247941000033110  
23 1657941000033110  
24 3086941000033119  
25 3087041000033118  
26 3087141000033119  
27 3087241000033114  
28 3087341000033116  
29 3087441000033110  
30 3087541000033111  
31 3156841000033113  
32 3156941000033117  
33 3157041000033116  
34 3157141000033117  
35 4088641000033111  
36 5334641000033116  
37 5334741000033113  
38 5334841000033115  
39 5891641000033110  
40 5891741000033118  
41 5891841000033111  
42 6390741000033112  
43 6390841000033119  
44 6390941000033110  
45 8047741000033110  
46 8180541000033116  
47 9173641000033116  
48 9956441000033114  
49 9956541000033110  
50 9956641000033111  
51 10541841000033110  
52 10541941000033119  
53 10615741000033116  
54 12361841000033113

For peer review only



1  
2 12667741000033116  
3 389641000033114  
4 391041000033115  
5 1242041000033111  
6 1904341000033114  
7 802441000033115  
8 802541000033119  
9  
10 5329841000033116  
11 5329741000033114  
12 1465441000033118  
13 1465341000033112  
14 799741000033115  
15 1459541000033112  
16 1461241000033116  
17 420641000033117  
18 420741000033114  
19 423141000033116  
20 880141000033114  
21 889541000033110  
22 889641000033111  
23 889841000033112  
24 889441000033114  
25 889741000033119  
26 1357541000033112  
27 1361441000033110  
28 1361541000033111  
29 1361641000033112  
30 1361741000033115  
31 880241000033119  
32 878641000033113  
33 879841000033115  
34 879941000033111  
35 880041000033110  
36 886141000033111  
37 887041000033114  
38 131541000033113  
39 131341000033118  
40  
41  
42  
43  
44  
45  
46  
47  
48  
49  
50  
51  
52  
53  
54  
55  
56  
57  
58  
59  
60

For peer review only

|    |                                                                                                  |
|----|--------------------------------------------------------------------------------------------------|
| 1  |                                                                                                  |
| 2  | Term                                                                                             |
| 3  | MabThera 100mg/10ml concentrate for solution for infusion vials (Roche Products Ltd)             |
| 4  | MabThera 500mg/50ml concentrate for solution for infusion vials (Roche Products Ltd)             |
| 5  | Rituximab 100mg/10ml solution for infusion vials                                                 |
| 6  | Rituximab 500mg/50ml solution for infusion vials                                                 |
| 7  | Rituximab 1.4g/11.7ml solution for injection vials                                               |
| 8  | MabThera 1400mg/11.7ml solution for injection vials (Roche Products Ltd)                         |
| 9  | Truxima 500mg/50ml concentrate for solution for infusion vials (Napp Pharmaceuticals Ltd)        |
| 10 | Rixathon 100mg/10ml concentrate for solution for infusion vials (Sandoz Ltd)                     |
| 11 | Rixathon 500mg/50ml concentrate for solution for infusion vials (Sandoz Ltd)                     |
| 12 | Truxima 100mg/10ml concentrate for solution for infusion vials (Napp Pharmaceuticals Ltd)        |
| 13 | Cyclophosphamide 1g powder for solution for injection vials                                      |
| 14 | Cyclophosphamide 200mg powder for solution for injection vials                                   |
| 15 | Cyclophosphamide 500mg powder for solution for injection vials                                   |
| 16 | Cyclophosphamide 50mg tablets                                                                    |
| 17 | Endoxana 50mg tablets (Baxter Healthcare Ltd)                                                    |
| 18 | Cyclophosphamide 2g powder for solution for injection vials                                      |
| 19 | Cyclophosphamide Injection                                                                       |
| 20 | Cyclophosphamide Injection 1.07 g/vial                                                           |
| 21 | Cyclophosphamide Tablets 10 mg                                                                   |
| 22 | Endoxana Tablets 10 mg                                                                           |
| 23 | Secukinumab 150mg/1ml solution for injection pre-filled syringes                                 |
| 24 | Cosentyx 150mg/1ml solution for injection pre-filled syringes (Novartis Pharmaceuticals UK Ltd)  |
| 25 | Secukinumab 150mg/1ml solution for injection pre-filled disposable devices                       |
| 26 | Cosentyx 150mg/1ml solution for injection pre-filled pens (Novartis Pharmaceuticals UK Ltd)      |
| 27 | Secukinumab 300mg/2ml solution for injection pre-filled disposable devices                       |
| 28 | Cosentyx 300mg/2ml solution for injection pre-filled pens (Novartis Pharmaceuticals UK Ltd)      |
| 29 | Secukinumab 75mg/0.5ml solution for injection pre-filled syringes                                |
| 30 | Cosentyx 75mg/0.5ml solution for injection pre-filled syringes (Novartis Pharmaceuticals UK Ltd) |
| 31 | Ixekizumab 80mg/1ml solution for injection pre-filled syringes                                   |
| 32 | Ixekizumab 80mg/1ml solution for injection pre-filled disposable devices                         |
| 33 | Taltz 80mg/1ml solution for injection pre-filled syringes (Eli Lilly and Company Ltd)            |
| 34 | Taltz 80mg/1ml solution for injection pre-filled pens (Eli Lilly and Company Ltd)                |
| 35 | Tocilizumab 200mg/10ml solution for infusion vials                                               |
| 36 | Tocilizumab 400mg/20ml solution for infusion vials                                               |
| 37 | Tocilizumab 80mg/4ml solution for infusion vials                                                 |
| 38 | RoActemra 200mg/10ml concentrate for solution for infusion vials (Roche Products Ltd)            |
| 39 | Tocilizumab 162mg/0.9ml solution for injection pre-filled syringes                               |
| 40 | RoActemra 162mg/0.9ml solution for injection pre-filled syringes (Roche Products Ltd)            |
| 41 | Tocilizumab 162mg/0.9ml solution for injection pre-filled disposable devices                     |
| 42 | RoActemra 162mg/0.9ml solution for injection pre-filled pens (Roche Products Ltd)                |
| 43 | RoActemra 400mg/20ml concentrate for solution for infusion vials (Roche Products Ltd)            |
| 44 | RoActemra 80mg/4ml concentrate for solution for infusion vials (Roche Products Ltd)              |
| 45 | Sarilumab 150mg/1.14ml solution for injection pre-filled disposable devices                      |
| 46 | Sarilumab 150mg/1.14ml solution for injection pre-filled syringes                                |
| 47 | Sarilumab 200mg/1.14ml solution for injection pre-filled disposable devices                      |
| 48 | Sarilumab 200mg/1.14ml solution for injection pre-filled syringes                                |
| 49 | Kevzara 150mg/1.14ml solution for injection pre-filled pens (Sanofi Genzyme)                     |
| 50 | Kevzara 200mg/1.14ml solution for injection pre-filled pens (Sanofi Genzyme)                     |
| 51 | Kevzara 200mg/1.14ml solution for injection pre-filled syringes (Sanofi Genzyme)                 |

1 Belimumab 120mg powder for solution for infusion vials  
2 Belimumab 400mg powder for solution for infusion vials  
3 Benlysta 120mg powder for concentrate for solution for infusion vials (GlaxoSmithKline UK Ltd)  
4 Belimumab 200mg/1ml solution for injection pre-filled disposable devices  
5 Adalimumab 40mg/0.8ml solution for injection pre-filled syringes  
6 Humira 40mg/0.8ml solution for injection pre-filled syringes (AbbVie Ltd)  
7 Adalimumab 40mg/0.8ml solution for injection pre-filled disposable devices  
8 Humira 40mg/0.8ml solution for injection pre-filled pens (AbbVie Ltd)  
9 Adalimumab 40mg/0.8ml solution for injection vials  
10 Humira 40mg/0.8ml solution for injection vials (AbbVie Ltd)  
11 Adalimumab 40mg/0.4ml solution for injection pre-filled syringes  
12 Adalimumab 40mg/0.4ml solution for injection pre-filled disposable devices  
13 Humira 40mg/0.4ml solution for injection pre-filled syringes (AbbVie Ltd)  
14 Humira 40mg/0.4ml solution for injection pre-filled pens (AbbVie Ltd)  
15 Adalimumab 20mg/0.2ml solution for injection pre-filled syringes  
16 Humira 20mg/0.2ml solution for injection pre-filled syringes (AbbVie Ltd)  
17 Amgevita 40mg/0.8ml solution for injection pre-filled pens (Amgen Ltd)  
18 Amgevita 40mg/0.8ml solution for injection pre-filled syringes (Amgen Ltd)  
19 Adalimumab 20mg/0.4ml solution for injection pre-filled syringes  
20 Amgevita 20mg/0.4ml solution for injection pre-filled syringes (Amgen Ltd)  
21 Adalimumab 80mg/0.8ml solution for injection pre-filled disposable devices  
22 Adalimumab 80mg/0.8ml solution for injection pre-filled syringes  
23 Humira 80mg/0.8ml solution for injection pre-filled pens (AbbVie Ltd)  
24 Humira 80mg/0.8ml solution for injection pre-filled syringes (AbbVie Ltd)  
25 Hyrimoz 40mg/0.8ml solution for injection pre-filled pens (Sandoz Ltd)  
26 Hyrimoz 40mg/0.8ml solution for injection pre-filled syringes (Sandoz Ltd)  
27 Imraldi 40mg/0.8ml solution for injection pre-filled pens (Biogen Idec Ltd)  
28 Imraldi 40mg/0.8ml solution for injection pre-filled syringes (Biogen Idec Ltd)  
29 Idacio 40mg/0.8ml solution for injection vials (Fresenius Kabi Ltd)  
30 Idacio 40mg/0.8ml solution for injection pre-filled pens (Fresenius Kabi Ltd)  
31 Idacio 40mg/0.8ml solution for injection pre-filled syringes (Fresenius Kabi Ltd)  
32 Certolizumab pegol 200mg/1ml solution for injection cartridges  
33 Cimzia 200mg/1ml solution for injection in a dose-dispenser cartridge (UCB Pharma Ltd)  
34 Cimzia 200mg/1ml solution for injection pre-filled pens (UCB Pharma Ltd)  
35 Certolizumab pegol 200mg/1ml solution for injection pre-filled disposable devices  
36 Certolizumab pegol 200mg/1ml solution for injection pre-filled syringes  
37 Cimzia 200mg/1ml solution for injection pre-filled syringes (UCB Pharma Ltd)  
38 Etanercept 25mg powder and solvent for solution for injection vials  
39 Enbrel 25mg powder and solvent for solution for injection vials (Pfizer Ltd)  
40 Etanercept 50mg powder and solvent for solution for injection vials  
41 Enbrel 50mg powder and solvent for solution for injection vials (Wyeth Pharmaceuticals)  
42 Etanercept 50mg/1ml solution for injection pre-filled syringes  
43 Enbrel 50mg/1ml solution for injection pre-filled syringes (Pfizer Ltd)  
44 Enbrel Paediatric 25mg powder and solvent for solution for injection vials (Pfizer Ltd)  
45 Etanercept 25mg/0.5ml solution for injection pre-filled syringes  
46 Enbrel 25mg/0.5ml solution for injection pre-filled syringes (Pfizer Ltd)  
47 Etanercept 50mg/1ml solution for injection pre-filled disposable devices  
48 Enbrel 50mg/1ml solution for injection pre-filled MyClic pens (Pfizer Ltd)  
49 Etanercept 10mg powder and solvent for solution for injection vials  
50 Enbrel Paediatric 10mg powder and solvent for solution for injection vials (Pfizer Ltd)

1 Benepali 50mg/1ml solution for injection pre-filled pens (Biogen Idec Ltd)  
2 Benepali 50mg/1ml solution for injection pre-filled syringes (Biogen Idec Ltd)  
3 Benepali 25mg/0.5ml solution for injection pre-filled syringes (Biogen Idec Ltd)  
4 Erelzi 25mg/0.5ml solution for injection pre-filled syringes (Sandoz Ltd)  
5 Erelzi 50mg/1ml solution for injection pre-filled syringes (Sandoz Ltd)  
6 Erelzi 50mg/1ml solution for injection pre-filled pens (Sandoz Ltd)  
7 Etanercept 25mg/0.5ml solution for injection pre-filled disposable devices  
8 Enbrel 25mg/0.5ml solution for injection pre-filled MyClic pens (Pfizer Ltd)  
9 Simponi 50mg/0.5ml solution for injection pre-filled syringes (Merck Sharp & Dohme (UK) Ltd)  
10 Simponi 50mg/0.5ml solution for injection pre-filled pens (Merck Sharp & Dohme (UK) Ltd)  
11 Simponi 100mg/1ml solution for injection pre-filled pens (Merck Sharp & Dohme (UK) Ltd)  
12 Golimumab 100mg/1ml solution for injection pre-filled disposable devices  
13 Golimumab 50mg/0.5ml solution for injection pre-filled disposable devices  
14 Golimumab 50mg/0.5ml solution for injection pre-filled syringes  
15 Infliximab 100mg powder for solution for infusion vials  
16 Remicade 100mg powder for concentrate for solution for infusion vials (Merck Sharp & Dohme (UK) Ltd)  
17 Remsima 100mg powder for concentrate for solution for infusion vials (Celltrion Healthcare UK Ltd)  
18 Inflectra 100mg powder for concentrate for solution for infusion vials (Pfizer Ltd)  
19 Flixabi 100mg powder for concentrate for solution for infusion vials (Biogen Idec Ltd)  
20 Zessly 100mg powder for concentrate for solution for infusion vials (Sandoz Ltd)  
21 Infliximab 120mg/1ml solution for injection pre-filled disposable devices  
22 Infliximab 120mg/1ml solution for injection pre-filled syringes  
23 Remsima 120mg/1ml solution for injection pre-filled pens (Celltrion Healthcare UK Ltd)  
24 Remsima 120mg/1ml solution for injection pre-filled syringes (Celltrion Healthcare UK Ltd)  
25 Ustekinumab 45mg/0.5ml solution for injection vials  
26 Stelara 45mg/0.5ml solution for injection vials (Janssen-Cilag Ltd)  
27 Ustekinumab 45mg/0.5ml solution for injection pre-filled syringes  
28 Stelara 45mg/0.5ml solution for injection pre-filled syringes (Janssen-Cilag Ltd)  
29 Ustekinumab 90mg/1ml solution for injection pre-filled syringes  
30 Stelara 90mg/1ml solution for injection pre-filled syringes (Janssen-Cilag Ltd)  
31 Ustekinumab 130mg/26ml solution for infusion vials  
32 Stelara 130mg/26ml concentrate for solution for infusion vials (Janssen-Cilag Ltd)  
33 Vedolizumab 300mg powder for solution for infusion vials  
34 Entyvio 300mg powder for concentrate for solution for infusion vials (Takeda UK Ltd)  
35 Vedolizumab 108mg/0.68ml solution for injection pre-filled syringes  
36 Vedolizumab 108mg/0.68ml solution for injection pre-filled disposable devices  
37 Entyvio 108mg/0.68ml solution for injection pre-filled pens (Takeda UK Ltd)  
38 Abatacept 250mg powder for solution for infusion vials  
39 Orencia 250mg powder for concentrate for solution for infusion vials (Bristol-Myers Squibb Pharmaceuticals Ltd)  
40 Abatacept 125mg/1ml solution for injection pre-filled syringes  
41 Orencia 125mg/1ml solution for injection pre-filled syringes (Bristol-Myers Squibb Pharmaceuticals Ltd)  
42 Abatacept 125mg/1ml solution for injection pre-filled disposable devices  
43 Orencia ClickJect 125mg/1ml solution for injection pre-filled pens (Bristol-Myers Squibb Pharmaceuticals Ltd)  
44 Abatacept 50mg/0.4ml solution for injection pre-filled syringes  
45 Abatacept 87.5mg/0.7ml solution for injection pre-filled syringes  
46 Orencia 50mg/0.4ml solution for injection pre-filled syringes (Bristol-Myers Squibb Pharmaceuticals Ltd)  
47 Baricitinib 4mg tablets  
48 Olumiant 4mg tablets (Eli Lilly and Company Ltd)  
49 Baricitinib 2mg tablets  
50 Olumiant 2mg tablets (Eli Lilly and Company Ltd)

1 Tofacitinib 5mg tablets  
2 Xeljanz 5mg tablets (Pfizer Ltd)  
3 Tofacitinib 10mg tablets  
4 Xeljanz 10mg tablets (Pfizer Ltd)  
5 Tofacitinib 11mg modified-release tablets  
6 Xeljanz 11mg modified-release tablets (Pfizer Ltd)  
7 Upadacitinib 15mg modified-release tablets  
8 Rinvoq 15mg modified-release tablets (AbbVie Ltd)  
9 Upadacitinib 30mg modified-release tablets  
10 Cortisone 25mg tablets  
11 \*Cortisone Acetate Pills (Sucrose)  
12 \*Cortisone Acetate Tablets  
13 Cortisone Acetate Tablets 5 mg  
14 Cortisone Tablets 5 mg  
15 Cortistab Tablets 25 mg  
16 Cortistab Tablets 5 mg  
17 Dexamethasone 0.1% eye drops  
18 Decadron 500microgram tablets (Organon Pharma (UK) Ltd)  
19 Dexamethasone 2mg tablets  
20 Dexamethasone 500microgram tablets  
21 Maxidex 0.1% eye drops (Novartis Pharmaceuticals UK Ltd)  
22 Dexamethasone 0.1% eye drops preservative free  
23 Dexamethasone 4mg tablets  
24 Dexamethasone 5mg/5ml oral solution  
25 Dexamethasone 5mg/5ml oral suspension  
26 Dexamethasone 500micrograms/5ml oral solution  
27 Dexamethasone 500micrograms/5ml oral suspension  
28 Dexamethasone 700microgram intravitreal implant with device  
29 Ozurdex 700microgram intravitreal implant in applicator (Allergan Ltd)  
30 Dexamethasone 40mg tablets  
31 Eythalm 1mg/ml eye drops (Aspire Pharma Ltd)  
32 Dexamethasone 8mg tablets  
33 Dexamethasone 0.1% eye drops 0.5ml unit dose preservative free  
34 Minims dexamethasone 0.1% eye drops 0.5ml unit dose (Bausch & Lomb UK Ltd)  
35 Dexsol 2mg/5ml oral solution (Rosemont Pharmaceuticals Ltd)  
36 Dexamethasone 2mg/5ml oral solution sugar free  
37 Dexamethasone 8mg/2ml solution for injection vials  
38 Dexamethasone 4mg/1ml solution for injection ampoules  
39 Martapan 2mg/5ml oral solution (Martindale Pharmaceuticals Ltd)  
40 Dropodex 0.1% eye drops 0.4ml unit dose (Rayner Pharmaceuticals Ltd)  
41 Dexamethasone 0.1% eye drops 0.4ml unit dose preservative free  
42 Dexamethasone 10mg/5ml oral solution sugar free  
43 Dexafree 1mg/1ml eye drops 0.4ml unit dose (Thea Pharmaceuticals Ltd)  
44 Dexamethasone 20mg/5ml oral solution sugar free  
45 Dexamethasone 2mg soluble tablets sugar free  
46 Dexamethasone 4mg soluble tablets sugar free  
47 Dexamethasone 8mg soluble tablets sugar free  
48 Glensoludex 2mg soluble tablets (Glenmark Pharmaceuticals Europe Ltd)  
49 Dexamethasone 10mg soluble tablets sugar free  
50 Dexamethasone 20mg soluble tablets sugar free

1 Dexamethasone (base) 6.6mg/2ml solution for injection vials  
2 Dexamethasone (base) 6.6mg/2ml solution for injection ampoules  
3 Dexamethasone (base) 3.8mg/1ml solution for injection vials  
4 Dexamethasone (base) 3.3mg/1ml solution for injection ampoules  
5 Glensoludex 8mg soluble tablets (Glenmark Pharmaceuticals Europe Ltd)  
6 Glensoludex 4mg soluble tablets (Glenmark Pharmaceuticals Europe Ltd)  
7 Dexamethasone Injection 20 mg/ml  
8 Dexamethasone Injection 4 mg  
9 Dexamethasone Phosphate Injection 4 mg/ml  
10 Dexamethasone Tablets 250 micrograms  
11 Dexamethasone Phosphate Injection 24 mg/ml, 5 ml vial  
12 Dexamethasone Injection 5 mg/ml, 2 ml vial  
13 Dexamethasone Injection 5 mg/ml, 1 ml ampoule  
14 Dexamethasone Solution for injection 3.3 mg/ml, 1 ml ampoule  
15 Dexamethasone Solution for injection 6.6 mg/2 ml vial  
16 Dexamethasone Solution for injection 6.6 mg/2 ml ampoule  
17 Dexamethasone Solution for injection 3.8 mg/1 ml vial  
18 Hydrocortisone 10mg/5ml oral suspension  
19 Hydrocortisone 20mg tablets  
20 Hydrocortisone 10mg tablets  
21 Hydrocortone 10mg tablets (Auden McKenzie (Pharma Division) Ltd)  
22 Hydrocortone 20mg tablets (Auden McKenzie (Pharma Division) Ltd)  
23 Hydrocortisone 5mg/5ml oral suspension  
24 Hydrocortisone 25mg/5ml oral suspension  
25 Hydrocortisone 5mg/5ml oral suspension sugar free  
26 Hydrocortisone 5mg modified-release tablets  
27 Hydrocortisone 20mg modified-release tablets  
28 Plenadren 5mg modified-release tablets (Takeda UK Ltd)  
29 Plenadren 20mg modified-release tablets (Takeda UK Ltd)  
30 Hydrocortisone 500microgram granules in capsules for opening  
31 Hydrocortisone 1mg granules in capsules for opening  
32 Hydrocortisone 5mg granules in capsules for opening  
33 Hydrocortisone 2mg granules in capsules for opening  
34 Alkindi 0.5mg granules in capsules for opening (Diurnal Ltd)  
35 Alkindi 1mg granules in capsules for opening (Diurnal Ltd)  
36 Alkindi 2mg granules in capsules for opening (Diurnal Ltd)  
37 Alkindi 5mg granules in capsules for opening (Diurnal Ltd)  
38 Hydrocortisone 10mg soluble tablets sugar free  
39 Hydventia 10mg tablets (OcXia)  
40 Hydventia 20mg tablets (OcXia)  
41 Hydrocortisone 2.5mg tablets  
42 Hydrocortisone 5mg tablets  
43 Hydrocortisone 15mg tablets  
44 Efmody 5mg modified-release capsules (Diurnal Ltd)  
45 Hydrocortisone 5mg modified-release capsules  
46 Efmody 10mg modified-release capsules (Diurnal Ltd)  
47 Hydrocortisone 2.5mg muco-adhesive buccal tablets sugar free  
48 Depo-Medrone 120mg/3ml suspension for injection vials (Pfizer Ltd)  
49 Depo-Medrone 80mg/2ml suspension for injection vials (Pfizer Ltd)  
50 Depo-Medrone 40mg/1ml suspension for injection vials (Pfizer Ltd)



1 Methylprednisolone acetate 40mg/1ml suspension for injection vials  
2 Methylprednisolone acetate 120mg/3ml suspension for injection vials  
3 Methylprednisolone acetate 80mg/2ml suspension for injection vials  
4 Methylprednisolone sodium succinate 1g powder and solvent for solution for injection vials  
5 Methylprednisolone sodium succinate 125mg powder and solvent for solution for injection vials  
6 Methylprednisolone sodium succinate 2g powder and solvent for solution for injection vials  
7 Methylprednisolone sodium succinate 40mg powder and solvent for solution for injection vials  
8 Methylprednisolone sodium succinate 500mg powder and solvent for solution for injection vials  
9 Medrone 100mg tablets (Pfizer Ltd)  
10 Methylprednisolone 100mg tablets  
11 Medrone 16mg tablets (Pfizer Ltd)  
12 Medrone 2mg tablets (Pfizer Ltd)  
13 Medrone 4mg tablets (Pfizer Ltd)  
14 Methylprednisolone 16mg tablets  
15 Methylprednisolone 2mg tablets  
16 Methylprednisolone 4mg tablets  
17 Solu-Medrone 40mg powder and solvent for solution for injection vials (Pfizer Ltd)  
18 Solu-Medrone 1g powder and solvent for solution for injection vials (Pfizer Ltd)  
19 Solu-Medrone 125mg powder and solvent for solution for injection vials (Pfizer Ltd)  
20 Solu-Medrone 2g powder and solvent for solution for injection vials (Pfizer Ltd)  
21 Solu-Medrone 500mg powder and solvent for solution for injection vials (Pfizer Ltd)  
22 Methylprednisolone Sodium Succinate Injection 125 mg/vial  
23 Methylprednisolone Sodium Succinate Injection 1 gram/vial  
24 Methylprednisolone Sodium Succinate Injection 500 mg/vial  
25 Methylprednisolone Sodium Succinate Injection 40 mg/vial  
26 Methylprednisolone Acetate Injection 10 mg/1 ml  
27 Deltacortril 2.5mg gastro-resistant tablets (Phoenix Labs Ltd)  
28 Deltacortril 5mg gastro-resistant tablets (Phoenix Labs Ltd)  
29 Prednisolone 2.5mg gastro-resistant tablets  
30 Prednisolone 5mg gastro-resistant tablets  
31 Prednema 20mg/100ml long tube (Forest Laboratories UK Ltd)  
32 Prednisolone 20mg/100ml enema long tube  
33 Prednisolone 25mg tablets  
34 Prednisolone 1mg tablets  
35 Prednisolone 2.5mg tablets  
36 Prednisolone 5mg tablets  
37 Dilacort 2.5mg gastro-resistant tablets (Crescent Pharma Ltd)  
38 Dilacort 5mg gastro-resistant tablets (Crescent Pharma Ltd)  
39 Prednisolone 15mg/5ml oral solution  
40 Prednisolone 10mg tablets  
41 Prednisolone 20mg tablets  
42 Pevanti 2.5mg tablets (Advanz Pharma)  
43 Pevanti 5mg tablets (Advanz Pharma)  
44 Pevanti 10mg tablets (Advanz Pharma)  
45 Pevanti 20mg tablets (Advanz Pharma)  
46 Pevanti 25mg tablets (Advanz Pharma)  
47 Prednisolone 5mg/5ml oral solution unit dose  
48 Prednisolone 10mg/ml oral solution sugar free  
49 Prednisolone 1mg gastro-resistant tablets  
50 Prednisolone 30mg tablets

1 Prednisolone sodium phosphate 5mg suppositories (Imported)  
2 Prednisolone sodium phosphate 5mg suppositories  
3 Prednisolone sodium phosphate 0.5% eye drops 0.5ml unit dose preservative free  
4 Prednisolone sodium phosphate 0.003% eye drops  
5 Prednisolone sodium phosphate 0.03% eye drops  
6 Prednisolone sodium phosphate 0.125% eye drops preservative free  
7 Prednisolone sodium phosphate 0.1% eye drops  
8 Prednisolone sodium phosphate 0.3% eye drops  
9 Prednisolone sodium phosphate 1% eye drops preservative free  
10 Prednisolone sodium phosphate 0.5% eye drops preservative free  
11 Prednisolone sodium phosphate 0.05% eye drops  
12 Predsol 5mg suppositories (Focus Pharmaceuticals Ltd)  
13 Prednisolone 5mg soluble tablets  
14 Predenema 20mg/100ml standard tube (Forest Laboratories UK Ltd)  
15 Prednisolone 20mg/100ml rectal solution  
16 Predsol 20mg/100ml retention enema (RPH Pharmaceuticals AB)  
17 Prednisolone sodium phosphate 0.03% eye drops preservative free  
18 Prednisolone sodium phosphate 0.1% eye drops preservative free  
19 Prednisolone sodium phosphate 0.3% eye drops preservative free  
20 Prednisolone sodium phosphate 0.01% eye drops  
21 Prednisolone sodium phosphate 0.5% ear/eye drops  
22 Predsol 0.5% ear/eye drops (RPH Pharmaceuticals AB)  
23 Minims prednisolone sodium phosphate 0.5% eye drops 0.5ml unit dose (Bausch & Lomb UK Ltd)  
24 Prednisolone acetate 1% eye drops  
25 Prednisolone 25mg/1ml suspension for injection ampoules  
26 Pred Forte 1% eye drops (Allergan Ltd)  
27 Deltastab 25mg/1ml suspension for injection ampoules (Advanz Pharma)  
28 Prednisone 1mg modified-release tablets  
29 Prednisone 2mg modified-release tablets  
30 Prednisone 5mg modified-release tablets  
31 \*Prednisolone Liquid  
32 \*Prednisolone Pills (Sucrose)  
33 \*Prednisolone Tablets  
34 Prednisolone Dompe Oral solution 5 mg/5 ml unit dose  
35 Prednisolone Eye drops 1 %  
36 Prednisolone Injection 16 mg/ml  
37 Prednisolone Sodium Phosphate Eye drops 0.5 %  
38 Prednisolone Suppositories 5 mg  
39 Prednisolone Steaglate Tablets 6.65 mg  
40 Prednisone Tablets 1 mg  
41 Prednisone Tablets 5 mg  
42 CellCept 250mg capsules (Roche Products Ltd)  
43 CellCept 500mg tablets (Roche Products Ltd)  
44 Mycophenolate mofetil 500mg tablets  
45 Mycophenolate mofetil 1g/5ml oral suspension sugar free  
46 CellCept 1g/5ml oral suspension (Roche Products Ltd)  
47 Arzip 250mg capsules (Zentiva Pharma UK Ltd)  
48 Arzip 500mg tablets (Zentiva Pharma UK Ltd)  
49 Myfenax 250mg capsules (Teva UK Ltd)  
50 Mycophenolate mofetil 250mg capsules



1 Myfenax 500mg tablets (Teva UK Ltd)  
2 Mycophenolate mofetil 500mg powder for solution for infusion vials  
3 CellCept 500mg powder for solution for infusion vials (Roche Products Ltd)  
4 Ceptava 360mg gastro-resistant tablets (Sandoz Ltd)  
5 Ceptava 180mg gastro-resistant tablets (Sandoz Ltd)  
6 Myfortic 360mg gastro-resistant tablets (Novartis Pharmaceuticals UK Ltd)  
7 Myfortic 180mg gastro-resistant tablets (Novartis Pharmaceuticals UK Ltd)  
8 Mycophenolic acid 360mg gastro-resistant tablets  
9 Mycophenolic acid 180mg gastro-resistant tablets  
10 Prograf 1mg capsules (Astellas Pharma Ltd)  
11 Prograf 5mg capsules (Astellas Pharma Ltd)  
12 Tacrolimus 1mg capsules  
13 Tacrolimus 5mg capsules  
14 Tacrolimus 500microgram capsules  
15 Prograf 500microgram capsules (Astellas Pharma Ltd)  
16 Tacrolimus 5mg/5ml oral suspension  
17 Tacrolimus 2.5mg/5ml oral suspension  
18 Tacrolimus 500microgram modified-release capsules  
19 Tacrolimus 1mg modified-release capsules  
20 Tacrolimus 5mg modified-release capsules  
21 Advagraf 0.5mg modified-release capsules (Astellas Pharma Ltd)  
22 Advagraf 1mg modified-release capsules (Astellas Pharma Ltd)  
23 Advagraf 5mg modified-release capsules (Astellas Pharma Ltd)  
24 Tacrolimus 3mg modified-release capsules  
25 Advagraf 3mg modified-release capsules (Astellas Pharma Ltd)  
26 Tacrolimus 200microgram granules sachets sugar free  
27 Tacrolimus 1mg granules sachets sugar free  
28 Modigraf 0.2mg granules sachets (Astellas Pharma Ltd)  
29 Modigraf 1mg granules sachets (Astellas Pharma Ltd)  
30 Adoport 0.5mg capsules (Sandoz Ltd)  
31 Adoport 1mg capsules (Sandoz Ltd)  
32 Adoport 5mg capsules (Sandoz Ltd)  
33 Tacrolimus 2.5mg/5ml oral solution  
34 Vivadex 1mg capsules (Dexcel-Pharma Ltd)  
35 Vivadex 5mg capsules (Dexcel-Pharma Ltd)  
36 Tacni 1mg capsules (Teva UK Ltd)  
37 Tacni 0.5mg capsules (Teva UK Ltd)  
38 Tacni 5mg capsules (Teva UK Ltd)  
39 Capexion 1mg capsules (Viatris UK Healthcare Ltd)  
40 Capexion 0.5mg capsules (Viatris UK Healthcare Ltd)  
41 Tacrolimus 750microgram modified-release tablets  
42 Tacrolimus 1mg modified-release tablets  
43 Tacrolimus 4mg modified-release tablets  
44 Envarsus 750microgram modified-release tablets (Chiesi Ltd)  
45 Envarsus 1mg modified-release tablets (Chiesi Ltd)  
46 Envarsus 4mg modified-release tablets (Chiesi Ltd)  
47 Tacrolimus 2mg capsules  
48 Tacrolimus 750microgram capsules  
49 Adoport 0.75mg capsules (Sandoz Ltd)  
50 Adoport 2mg capsules (Sandoz Ltd)

1  
2 Tacrolimus 2mg modified-release capsules  
3 Dailiport 0.5mg modified-release capsules (Sandoz Ltd)  
4 Dailiport 1mg modified-release capsules (Sandoz Ltd)  
5 Dailiport 2mg modified-release capsules (Sandoz Ltd)  
6 Dailiport 3mg modified-release capsules (Sandoz Ltd)  
7 Dailiport 5mg modified-release capsules (Sandoz Ltd)  
8 Azathioprine 50mg powder for solution for injection vials  
9 Azathioprine 25mg tablets  
10 Azathioprine 50mg tablets  
11 Imuran 50mg powder for solution for injection vials (Aspen Pharma Trading Ltd)  
12 Imuran 50mg tablets (Aspen Pharma Trading Ltd)  
13 Imuran 25mg tablets (Aspen Pharma Trading Ltd)  
14 Immunoprin 50mg tablets (Ashbourne Pharmaceuticals Ltd)  
15 Azathioprine 20mg/5ml oral suspension  
16 Azathioprine 50mg/5ml oral suspension  
17 Azathioprine 10mg capsules  
18 Azathioprine 25mg/5ml oral suspension  
19 Azathioprine 50mg/5ml oral solution  
20 Azathioprine 100mg/5ml oral suspension  
21 Azathioprine 30mg/5ml oral suspension  
22 Azathioprine 250mg/5ml oral solution  
23 Azapress 50mg tablets (Ennogen Pharma Ltd)  
24 Azathioprine 75mg/5ml oral suspension  
25 Azathioprine Tablets 10 mg  
26 Imuran Tablets 10 mg  
27 Mercaptopurine 50mg tablets  
28 Puri-Nethol 50mg tablets (Aspen Pharma Trading Ltd)  
29 Mercaptopurine 50mg/5ml oral suspension  
30 Mercaptopurine 20mg/ml oral suspension  
31 Mercaptopurine 10mg capsules  
32 Xaluprine 20mg/ml oral suspension (Nova Laboratories Ltd)  
33 Mercaptopurine 10mg tablets  
34 Mercaptopurine 75mg tablets  
35 Mercaptopurine 25mg tablets  
36 Hanixol 50mg tablets (Fontus Health Ltd)  
37 Maxtrex 10mg tablets (Pfizer Ltd)  
38 Maxtrex 2.5mg tablets (Pfizer Ltd)  
39 Methotrexate 1g/40ml solution for injection vials  
40 Methotrexate 200mg/8ml solution for injection vials  
41 Methotrexate 5g/200ml solution for infusion vials  
42 Methotrexate 5mg/2ml solution for injection vials  
43 Methotrexate 50mg/2ml solution for injection vials  
44 Methotrexate 500mg/20ml solution for injection vials  
45 Methotrexate 2.5mg tablets  
46 Methotrexate 10mg tablets  
47 Methotrexate 1g/10ml solution for injection vials  
48 Methotrexate 5g/50ml solution for infusion vials  
49 Methotrexate 2.5mg/5ml oral suspension  
50 Methotrexate 15mg/5ml oral solution  
51 Methotrexate 10mg/5ml oral solution

1 Methotrexate 25mg/1ml solution for injection pre-filled syringes  
2 Methotrexate 10mg/5ml oral suspension  
3 Methotrexate 7.5mg/5ml oral suspension  
4 Methotrexate 7.5mg/0.75ml solution for injection pre-filled syringes  
5 Methotrexate 10mg/1ml solution for injection pre-filled syringes  
6 Methotrexate 15mg/1.5ml solution for injection pre-filled syringes  
7 Methotrexate 20mg/2ml solution for injection pre-filled syringes  
8 Methotrexate 25mg/2.5ml solution for injection pre-filled syringes  
9 Methotrexate 25mg/2.5ml solution for injection pre-filled syringes  
10 Methotrexate 25mg/2.5ml solution for injection pre-filled syringes  
11 Methotrexate 25mg/2.5ml solution for injection pre-filled syringes  
12 Methotrexate 25mg/2.5ml solution for injection pre-filled syringes  
13 Methotrexate 25mg/2.5ml solution for injection pre-filled syringes  
14 Methotrexate 25mg/2.5ml solution for injection pre-filled syringes  
15 Methotrexate 25mg/2.5ml solution for injection pre-filled syringes  
16 Methotrexate 25mg/2.5ml solution for injection pre-filled syringes  
17 Methotrexate 25mg/2.5ml solution for injection pre-filled syringes  
18 Methotrexate 25mg/2.5ml solution for injection pre-filled syringes  
19 Methotrexate 25mg/2.5ml solution for injection pre-filled syringes  
20 Methotrexate 25mg/2.5ml solution for injection pre-filled syringes  
21 Methotrexate 25mg/2.5ml solution for injection pre-filled syringes  
22 Methotrexate 25mg/2.5ml solution for injection pre-filled syringes  
23 Methotrexate 25mg/2.5ml solution for injection pre-filled syringes  
24 Methotrexate 25mg/2.5ml solution for injection pre-filled syringes  
25 Methotrexate 25mg/2.5ml solution for injection pre-filled syringes  
26 Methotrexate 25mg/2.5ml solution for injection pre-filled syringes  
27 Methotrexate 25mg/2.5ml solution for injection pre-filled syringes  
28 Methotrexate 25mg/2.5ml solution for injection pre-filled syringes  
29 Methotrexate 25mg/2.5ml solution for injection pre-filled syringes  
30 Methotrexate 25mg/2.5ml solution for injection pre-filled syringes  
31 Methotrexate 25mg/2.5ml solution for injection pre-filled syringes  
32 Methotrexate 25mg/2.5ml solution for injection pre-filled syringes  
33 Methotrexate 25mg/2.5ml solution for injection pre-filled syringes  
34 Methotrexate 25mg/2.5ml solution for injection pre-filled syringes  
35 Methotrexate 25mg/2.5ml solution for injection pre-filled syringes  
36 Methotrexate 25mg/2.5ml solution for injection pre-filled syringes  
37 Methotrexate 25mg/2.5ml solution for injection pre-filled syringes  
38 Methotrexate 25mg/2.5ml solution for injection pre-filled syringes  
39 Methotrexate 25mg/2.5ml solution for injection pre-filled syringes  
40 Methotrexate 25mg/2.5ml solution for injection pre-filled syringes  
41 Methotrexate 25mg/2.5ml solution for injection pre-filled syringes  
42 Methotrexate 25mg/2.5ml solution for injection pre-filled syringes  
43 Methotrexate 25mg/2.5ml solution for injection pre-filled syringes  
44 Methotrexate 25mg/2.5ml solution for injection pre-filled syringes  
45 Methotrexate 25mg/2.5ml solution for injection pre-filled syringes  
46 Methotrexate 25mg/2.5ml solution for injection pre-filled syringes  
47 Methotrexate 25mg/2.5ml solution for injection pre-filled syringes  
48 Ebetrex 20mg/1ml solution for injection pre-filled syringes (Sandoz Ltd)  
49 Methotrexate 20mg/0.8ml solution for injection pre-filled syringes  
50 Methotrexate 7.5mg/0.15ml solution for injection pre-filled disposable devices  
51 Methotrexate 10mg/0.2ml solution for injection pre-filled disposable devices  
52 Methotrexate 12.5mg/0.25ml solution for injection pre-filled disposable devices  
53 Methotrexate 15mg/0.3ml solution for injection pre-filled disposable devices  
54 Methotrexate 17.5mg/0.35ml solution for injection pre-filled disposable devices  
55 Methotrexate 20mg/0.4ml solution for injection pre-filled disposable devices  
56 Methotrexate 22.5mg/0.45ml solution for injection pre-filled disposable devices  
57 Methotrexate 25mg/0.5ml solution for injection pre-filled disposable devices  
58 Methotrexate 27.5mg/0.55ml solution for injection pre-filled disposable devices  
59 Methotrexate 27.5mg/0.55ml solution for injection pre-filled disposable devices  
60 Methotrexate 30mg/0.6ml solution for injection pre-filled disposable devices

1 Metoject PEN 7.5mg/0.15ml solution for injection pre-filled pens (medac UK)  
2 Metoject PEN 10mg/0.2ml solution for injection pre-filled pens (medac UK)  
3 Metoject PEN 12.5mg/0.25ml solution for injection pre-filled pens (medac UK)  
4 Metoject PEN 15mg/0.3ml solution for injection pre-filled pens (medac UK)  
5 Metoject PEN 17.5mg/0.35ml solution for injection pre-filled pens (medac UK)  
6 Metoject PEN 20mg/0.4ml solution for injection pre-filled pens (medac UK)  
7 Metoject PEN 22.5mg/0.45ml solution for injection pre-filled pens (medac UK)  
8 Metoject PEN 25mg/0.5ml solution for injection pre-filled pens (medac UK)  
9 Metoject PEN 27.5mg/0.55ml solution for injection pre-filled pens (medac UK)  
10 Metoject PEN 30mg/0.6ml solution for injection pre-filled pens (medac UK)  
11 Methotrexate 2mg/ml oral solution sugar free  
12 Methotrexate 7.5mg/0.3ml solution for injection pre-filled syringes  
13 Methotrexate 10mg/0.4ml solution for injection pre-filled syringes  
14 Methotrexate 22.5mg/0.9ml solution for injection pre-filled syringes  
15 Zlatal 7.5mg/0.3ml solution for injection pre-filled syringes (Nordic Pharma Ltd)  
16 Zlatal 10mg/0.4ml solution for injection pre-filled syringes (Nordic Pharma Ltd)  
17 Zlatal 12.5mg/0.5ml solution for injection pre-filled syringes (Nordic Pharma Ltd)  
18 Zlatal 15mg/0.6ml solution for injection pre-filled syringes (Nordic Pharma Ltd)  
19 Zlatal 17.5mg/0.7ml solution for injection pre-filled syringes (Nordic Pharma Ltd)  
20 Zlatal 20mg/0.8ml solution for injection pre-filled syringes (Nordic Pharma Ltd)  
21 Zlatal 25mg/1ml solution for injection pre-filled syringes (Nordic Pharma Ltd)  
22 Methotrexate 10mg/0.4ml solution for injection pre-filled disposable devices  
23 Methotrexate 12.5mg/0.5ml solution for injection pre-filled disposable devices  
24 Methotrexate 15mg/0.6ml solution for injection pre-filled disposable devices  
25 Methotrexate 17.5mg/0.7ml solution for injection pre-filled disposable devices  
26 Methotrexate 20mg/0.8ml solution for injection pre-filled disposable devices  
27 Methotrexate 22.5mg/0.9ml solution for injection pre-filled disposable devices  
28 Methotrexate 25mg/1ml solution for injection pre-filled disposable devices  
29 Methotrexate 7.5mg/0.3ml solution for injection pre-filled disposable devices  
30 Nordimet 10mg/0.4ml solution for injection pre-filled pens (Nordic Pharma Ltd)  
31 Nordimet 12.5mg/0.5ml solution for injection pre-filled pens (Nordic Pharma Ltd)  
32 Nordimet 15mg/0.6ml solution for injection pre-filled pens (Nordic Pharma Ltd)  
33 Nordimet 17.5mg/0.7ml solution for injection pre-filled pens (Nordic Pharma Ltd)  
34 Nordimet 20mg/0.8ml solution for injection pre-filled pens (Nordic Pharma Ltd)  
35 Nordimet 22.5mg/0.9ml solution for injection pre-filled pens (Nordic Pharma Ltd)  
36 Nordimet 25mg/1ml solution for injection pre-filled pens (Nordic Pharma Ltd)  
37 Nordimet 7.5mg/0.3ml solution for injection pre-filled pens (Nordic Pharma Ltd)  
38 Methofill 10mg/0.2ml solution for injection pre-filled injector (Accord Healthcare Ltd)  
39 Methofill 12.5mg/0.25ml solution for injection pre-filled injector (Accord Healthcare Ltd)  
40 Methofill 15mg/0.3ml solution for injection pre-filled injector (Accord Healthcare Ltd)  
41 Methofill 17.5mg/0.35ml solution for injection pre-filled injector (Accord Healthcare Ltd)  
42 Methofill 20mg/0.4ml solution for injection pre-filled injector (Accord Healthcare Ltd)  
43 Methofill 22.5mg/0.45ml solution for injection pre-filled injector (Accord Healthcare Ltd)  
44 Methofill 25mg/0.5ml solution for injection pre-filled injector (Accord Healthcare Ltd)  
45 Methofill 27.5mg/0.55ml solution for injection pre-filled injector (Accord Healthcare Ltd)  
46 Methofill 7.5mg/0.15ml solution for injection pre-filled injector (Accord Healthcare Ltd)  
47 Jylamvo 2mg/ml oral solution (Esteve Pharmaceuticals Ltd)  
48 Methofill 7.5mg/0.15ml solution for injection pre-filled syringes (Accord Healthcare Ltd)  
49 Methofill 10mg/0.2ml solution for injection pre-filled syringes (Accord Healthcare Ltd)  
50 Methofill 12.5mg/0.25ml solution for injection pre-filled syringes (Accord Healthcare Ltd)

1 Methofill 15mg/0.3ml solution for injection pre-filled syringes (Accord Healthcare Ltd)  
2 Methofill 17.5mg/0.35ml solution for injection pre-filled syringes (Accord Healthcare Ltd)  
3 Methofill 20mg/0.4ml solution for injection pre-filled syringes (Accord Healthcare Ltd)  
4 Methofill 22.5mg/0.45ml solution for injection pre-filled syringes (Accord Healthcare Ltd)  
5 Methofill 25mg/0.5ml solution for injection pre-filled syringes (Accord Healthcare Ltd)  
6 Methotrexate Injection 100 mg/4 ml  
7 Methotrexate Injection 2.5 mg/1 ml  
8 Methotrexate Injection 25 mg/1 ml  
9 Methotrexate Injection 500 mg/vial  
10 Methotrexate Tablets 25 mg  
11 Neoral 100mg capsules (Novartis Pharmaceuticals UK Ltd)  
12 Neoral 25mg capsules (Novartis Pharmaceuticals UK Ltd)  
13 Neoral 50mg capsules (Novartis Pharmaceuticals UK Ltd)  
14 Neoral 100mg/ml oral solution (Novartis Pharmaceuticals UK Ltd)  
15 Sandimmun 25mg capsules (Novartis Pharmaceuticals UK Ltd)  
16 Sandimmun 100mg capsules (Novartis Pharmaceuticals UK Ltd)  
17 Sandimmun 50mg capsules (Novartis Pharmaceuticals UK Ltd)  
18 Sandimmun 100mg/ml oral solution (Novartis Pharmaceuticals UK Ltd)  
19 Neoral 10mg capsules (Novartis Pharmaceuticals UK Ltd)  
20 Ciclosporin 10mg capsules  
21 Ciclosporin 25mg capsules  
22 Ciclosporin 100mg capsules  
23 Ciclosporin 50mg capsules  
24 Ciclosporin 100mg/ml oral solution sugar free  
25 Ciclosporin 0.2% eye ointment  
26 Ciclosporin 2% eye drops preservative free  
27 Ciclosporin 50mg/1ml solution for infusion ampoules  
28 Ciclosporin 250mg/5ml solution for infusion ampoules  
29 Sandimmun 50mg/1ml concentrate for solution for infusion ampoules (Novartis Pharmaceuticals UK Ltd)  
30 Sandimmun 250mg/5ml concentrate for solution for infusion ampoules (Novartis Pharmaceuticals UK Ltd)  
31 Restasis 0.05% eye drops 0.4ml unit dose (Imported (United States))  
32 Deximune 100mg capsules (Dexcel-Pharma Ltd)  
33 Deximune 50mg capsules (Dexcel-Pharma Ltd)  
34 Deximune 25mg capsules (Dexcel-Pharma Ltd)  
35 Capimune 100mg capsules (Viatris UK Healthcare Ltd)  
36 Capimune 25mg capsules (Viatris UK Healthcare Ltd)  
37 Capimune 50mg capsules (Viatris UK Healthcare Ltd)  
38 Capsorin 25mg capsules (Morningside Healthcare Ltd)  
39 Capsorin 50mg capsules (Morningside Healthcare Ltd)  
40 Capsorin 100mg capsules (Morningside Healthcare Ltd)  
41 Ciclosporin 0.06% eye drops preservative free  
42 Ciclosporin 0.2% eye ointment preservative free  
43 Ciclosporin 0.05% eye drops 0.4ml unit dose preservative free  
44 Vanquoral 100mg capsules (Teva UK Ltd)  
45 Vanquoral 50mg capsules (Teva UK Ltd)  
46 Vanquoral 25mg capsules (Teva UK Ltd)  
47 Ciclosporin 0.1% eye drops 0.3ml unit dose  
48 Ikervis 0.1% eye drops 0.3ml unit dose (Santen UK Ltd)  
49 Vanquoral 10mg capsules (Teva UK Ltd)  
50 Ciclosporin 0.06% eye drops 0.4ml unit dose preservative free



1 Verkazia 0.1% eye drops 0.3ml unit dose (Santen UK Ltd)  
2 Cyclosporin Capsules 25 mg  
3 Cyclosporin Intravenous infusion 50 mg/ml  
4 Sandimmun Intravenous infusion 50 mg/ml  
5 Cyclosporin Sugar-free oral solution 100 mg/ml  
6 Kenalog Intramuscular 40mg/1ml suspension for injection pre-filled syringes (Bristol-Myers Squibb Pharmaceu  
7 Kenalog Intramuscular 80mg/2ml suspension for injection pre-filled syringes (Bristol-Myers Squibb Pharmaceu  
8 Kenalog Intra-articular / Intramuscular 40mg/1ml suspension for injection vials (Bristol-Myers Squibb Pharmac  
9 Triamcinolone acetonide 40mg/1ml suspension for injection vials  
10 Triamcinolone acetonide 80mg/2ml suspension for injection pre-filled syringes  
11 Triamcinolone acetonide 40mg/1ml suspension for injection pre-filled syringes  
12 Kenalog Injection 40 mg/ml  
13 Triamcinolone Acetonide Injection 40 mg/ml  
14 Triamcinolone Acetonide Injection 10 mg/ml  
15 Depo-Medrone 120mg/3ml suspension for injection vials (Pfizer Ltd)  
16 Depo-Medrone 80mg/2ml suspension for injection vials (Pfizer Ltd)  
17 Depo-Medrone 40mg/1ml suspension for injection vials (Pfizer Ltd)  
18 Methylprednisolone acetate 120mg/3ml suspension for injection vials  
19 Methylprednisolone sodium succinate 125mg powder and solvent for solution for injection vials  
20 Methylprednisolone sodium succinate 2g powder and solvent for solution for injection vials  
21 Methylprednisolone sodium succinate 500mg powder and solvent for solution for injection vials  
22 Methylprednisolone sodium succinate 1g powder and solvent for solution for injection vials  
23 Methylprednisolone sodium succinate 40mg powder and solvent for solution for injection vials  
24 Solu-Medrone 40mg powder and solvent for solution for injection vials (Pfizer Ltd)  
25 Solu-Medrone 1g powder and solvent for solution for injection vials (Pfizer Ltd)  
26 Solu-Medrone 125mg powder and solvent for solution for injection vials (Pfizer Ltd)  
27 Solu-Medrone 2g powder and solvent for solution for injection vials (Pfizer Ltd)  
28 Solu-Medrone 500mg powder and solvent for solution for injection vials (Pfizer Ltd)  
29 Methylprednisolone acetate 80mg/2ml suspension for injection vials  
30 Methylprednisolone acetate 40mg/1ml suspension for injection vials  
31 Methylprednisolone Sodium Succinate Injection 1 gram/vial  
32 Methylprednisolone Sodium Succinate Injection 125 mg/vial  
33 Methylprednisolone Sodium Succinate Injection 500 mg/vial  
34 Methylprednisolone Acetate Injection 10 mg/1 ml  
35 Methylprednisolone Sodium Succinate Injection 40 mg/vial  
36 Betamethasone 4mg/1ml solution for injection ampoules  
37 Betnesol 4mg/1ml solution for injection ampoules (Focus Pharmaceuticals Ltd)  
38  
39  
40  
41  
42  
43  
44  
45  
46  
47  
48  
49  
50  
51  
52  
53  
54  
55  
56  
57  
58  
59  
60

1  
2  
3  
4  
5  
6  
7  
8  
9  
10  
11  
12  
13  
14  
15  
16  
17  
18  
19  
20  
21  
22  
23  
24  
25  
26  
27  
28  
29  
30  
31  
32  
33  
34  
35  
36  
37  
38  
39  
40  
41  
42  
43  
44  
45  
46  
47  
48  
49  
50  
51  
52  
53  
54  
55  
56  
57  
58  
59  
60

For peer review only

1  
2  
3  
4  
5  
6  
7  
8  
9  
10  
11  
12  
13  
14  
15  
16  
17  
18  
19  
20  
21  
22  
23  
24  
25  
26  
27  
28  
29  
30  
31  
32  
33  
34  
35  
36  
37  
38  
39  
40  
41  
42  
43  
44  
45  
46  
47  
48  
49  
50  
51  
52  
53  
54  
55  
56  
57  
58  
59  
60

For peer review only



1  
2  
3  
4  
5  
6  
7  
8  
9  
10  
11  
12  
13  
14  
15  
16  
17  
18  
19  
20  
21  
22  
23  
24  
25  
26  
27  
28  
29  
30  
31  
32  
33  
34  
35  
36  
37  
38  
39  
40  
41  
42  
43  
44  
45  
46  
47  
48  
49  
50  
51  
52  
53  
54  
55  
56  
57  
58  
59  
60

For peer review only

1  
2  
3  
4  
5  
6  
7  
8  
9  
10  
11  
12  
13  
14  
15  
16  
17  
18  
19  
20  
21  
22  
23  
24  
25  
26  
27  
28  
29  
30  
31  
32  
33  
34  
35  
36  
37  
38  
39  
40  
41  
42  
43  
44  
45  
46  
47  
48  
49  
50  
51  
52  
53  
54  
55  
56  
57  
58  
59  
60

For peer review only

1  
2  
3  
4  
5  
6  
7  
8  
9  
10  
11  
12  
13  
14  
15  
16  
17  
18  
19  
20  
21  
22  
23  
24  
25  
26  
27  
28  
29  
30  
31  
32  
33  
34  
35  
36  
37  
38  
39  
40  
41  
42  
43  
44  
45  
46  
47  
48  
49  
50  
51  
52  
53  
54  
55  
56  
57  
58  
59  
60

For peer review only

1  
2  
3  
4  
5  
6  
7  
8  
9  
10  
11  
12  
13  
14  
15  
16  
17  
18  
19  
20  
21  
22  
23  
24  
25  
26  
27  
28  
29  
30  
31  
32  
33  
34  
35  
36  
37  
38  
39  
40  
41  
42  
43  
44  
45  
46  
47  
48  
49  
50  
51  
52  
53  
54  
55  
56  
57  
58  
59  
60

For peer review only

1  
2  
3  
4  
5  
6  
7  
8  
9  
10  
11  
12  
13  
14  
15  
16  
17  
18  
19  
20  
21  
22  
23  
24  
25  
26  
27  
28  
29  
30  
31  
32  
33  
34  
35  
36  
37  
38  
39  
40  
41  
42  
43  
44  
45  
46  
47  
48  
49  
50  
51  
52  
53  
54  
55  
56  
57  
58  
59  
60

For peer review only

1  
2  
3  
4  
5  
6  
7  
8  
9  
10  
11  
12  
13  
14  
15  
16  
17  
18  
19  
20  
21  
22  
23  
24  
25  
26  
27  
28  
29  
30  
31  
32  
33  
34  
35  
36  
37  
38  
39  
40  
41  
42  
43  
44  
45  
46  
47  
48  
49  
50  
51  
52  
53  
54  
55  
56  
57  
58  
59  
60

For peer review only

1  
2  
3  
4  
5  
6  
7  
8  
9  
10  
11  
12  
13  
14  
15  
16  
17  
18  
19  
20  
21  
22  
23  
24  
25  
26  
27  
28  
29  
30  
31  
32  
33  
34  
35  
36  
37  
38  
39  
40  
41  
42  
43  
44  
45  
46  
47  
48  
49  
50  
51  
52  
53  
54  
55  
56  
57  
58  
59  
60

For peer review only

1  
2  
3  
4  
5  
6  
7  
8  
9  
10  
11  
12  
13  
14  
15  
16  
17  
18  
19  
20  
21  
22  
23  
24  
25  
26  
27  
28  
29  
30  
31  
32  
33  
34  
35  
36  
37  
38  
39  
40  
41  
42  
43  
44  
45  
46  
47  
48  
49  
50  
51  
52  
53  
54  
55  
56  
57  
58  
59  
60

For peer review only



1  
2  
3  
4  
5  
6  
7  
8  
9  
10  
11  
12  
13  
14  
15  
16  
17  
18  
19  
20  
21  
22  
23  
24  
25  
26  
27  
28  
29  
30  
31  
32  
33  
34  
35  
36  
37  
38  
39  
40  
41  
42  
43  
44  
45  
46  
47  
48  
49  
50  
51  
52  
53  
54  
55  
56  
57  
58  
59  
60

For peer review only

1  
2  
3  
4  
5  
6  
7  
8  
9  
10  
11  
12  
13  
14  
15  
16  
17  
18  
19  
20  
21  
22  
23  
24  
25  
26  
27  
28  
29  
30  
31  
32  
33  
34  
35  
36  
37  
38  
39  
40  
41  
42  
43  
44  
45  
46  
47  
48  
49  
50  
51  
52  
53  
54  
55  
56  
57  
58  
59  
60

For peer review only

1  
2  
3  
4  
5  
6  
7  
8  
9  
10  
11  
12  
13  
14  
15  
16  
17  
18  
19  
20  
21  
22  
23  
24  
25  
26  
27  
28  
29  
30  
31  
32  
33  
34  
35  
36  
37  
38  
39  
40  
41  
42  
43  
44  
45  
46  
47  
48  
49  
50  
51  
52  
53  
54  
55  
56  
57  
58  
59  
60

d)

For peer review only

|    |                   |
|----|-------------------|
| 1  |                   |
| 2  | Medcodeid         |
| 3  | 293362015         |
| 4  | 293658016         |
| 5  | 293678012         |
| 6  | 293740017         |
| 7  | 398903019         |
| 8  | 452781013         |
| 9  | 481559011         |
| 10 | 484842011         |
| 11 | 500241011         |
| 12 | 1216993016        |
| 13 | 96071000006117    |
| 14 | 111721000006119   |
| 15 | 146001000006114   |
| 16 | 146011000006112   |
| 17 | 186501000006111   |
| 18 | 574181000006118   |
| 19 | 574921000006119   |
| 20 | 574931000006116   |
| 21 | 574941000006114   |
| 22 | 585091000006112   |
| 23 | 589121000006113   |
| 24 | 633031000006112   |
| 25 | 881851000006111   |
| 26 | 2657551000006119  |
| 27 | 2870551000006114  |
| 28 | 2870591000006115  |
| 29 | 2870611000006114  |
| 30 | 2870621000006118  |
| 31 | 3004901000006110  |
| 32 | 3004921000006117  |
| 33 | 3838561000006117  |
| 34 | 3941711000006112  |
| 35 | 4760811000006112  |
| 36 | 4760861000006110  |
| 37 | 5066341000006110  |
| 38 | 5066531000006111  |
| 39 | 5067711000006114  |
| 40 | 7854021000006118  |
| 41 | 13698071000006117 |
| 42 | 13698081000006119 |
| 43 | 13698091000006116 |
| 44 | 13698101000006110 |
| 45 | 13698121000006117 |
| 46 | 13698131000006119 |
| 47 | 13698141000006112 |
| 48 | 13698151000006114 |
| 49 | 13698181000006118 |
| 50 | 13698201000006117 |
| 51 | 13698221000006110 |

For peer review only

1  
2 13698231000006113  
3 13698241000006115  
4 13698251000006118  
5 13698261000006116  
6 13698271000006111  
7  
8 13698281000006114  
9 13698301000006113  
10 13698441000006119  
11 13698461000006115  
12 13698561000006119  
13 13698661000006118  
14  
15 13995991000006110  
16 13996001000006111  
17 3571231000006115  
18 4315091000006117  
19 351428015  
20  
21 2870601000006111  
22 4355901000006116  
23 4760731000006114  
24 4760751000006119  
25 4760771000006112  
26 5066121000006117  
27 5066141000006112  
28 5066171000006116  
29 5066231000006113  
30 5066251000006118  
31 5066271000006111  
32  
33  
34  
35  
36  
37  
38  
39  
40  
41  
42  
43  
44  
45  
46  
47  
48  
49  
50  
51  
52  
53  
54  
55  
56  
57  
58  
59  
60

For peer review only

|    |                                                                                                    |
|----|----------------------------------------------------------------------------------------------------|
| 1  |                                                                                                    |
| 2  | Term                                                                                               |
| 3  | Polyclonal hypergammaglobulinaemia NOS                                                             |
| 4  | Hypogammaglobulinaemia                                                                             |
| 5  | Agammaglobulinaemia NEC                                                                            |
| 6  | [X]Other common variable immunodeficiencies                                                        |
| 7  |                                                                                                    |
| 8  | Congenital hypogammaglobulinaemia                                                                  |
| 9  | Agammaglobulinaemia                                                                                |
| 10 | Common variable immunodeficiency                                                                   |
| 11 | Severe combined immunodeficiency                                                                   |
| 12 | Bruton's agammaglobulinaemia                                                                       |
| 13 | Immunodeficiency with IgM hypergammaglobulinaemia                                                  |
| 14 | Transient infant hypogammaglobulinaemia                                                            |
| 15 | Swiss type agammaglobulinaemia                                                                     |
| 16 | Severe combined immunodeficiency with low or normal B-cell numbers                                 |
| 17 | Severe combined immunodeficiency with low T- and B-cell numbers                                    |
| 18 | Recessive agammaglobulinaemia                                                                      |
| 19 | Common variable immunodeficiency with predominant abnormalities of B-cell numbers and functions    |
| 20 | Common variable immunodeficiency with predominant immunoregulatory T-cell disorders                |
| 21 | Common variable immunodeficiency with autoantibodies to B- or T-cells                              |
| 22 | Common variable immunodeficiency                                                                   |
| 23 | Congenital sex-linked agammaglobulinaemia                                                          |
| 24 | X-linked agammaglobulinaemia                                                                       |
| 25 | Dysgammaglobulinaemia NEC                                                                          |
| 26 | A/Hypo-gammaglobulinaemia                                                                          |
| 27 | Good syndrome                                                                                      |
| 28 | Common variable agammaglobulinaemia                                                                |
| 29 | CVI - Common variable immunodeficiency                                                             |
| 30 | CVID - Common variable immunodeficiency                                                            |
| 31 | Acquired hypogammaglobulinaemia                                                                    |
| 32 | Severe combined immunodeficiency disease                                                           |
| 33 | SCID - Severe combined immunodeficiency                                                            |
| 34 | Hyper IgM syndrome                                                                                 |
| 35 | Transient hypogammaglobulinaemia of infancy                                                        |
| 36 | Autosomal recessive severe combined immunodeficiency                                               |
| 37 | Severe combined immunodeficiency with reticular dysgenesis                                         |
| 38 | Specific antibody deficiency                                                                       |
| 39 | Warts, hypogammaglobulinaemia, infections, and myelokathexis                                       |
| 40 | Triple X syndrome, epilepsy, and hypogammaglobulinaemia                                            |
| 41 | X-linked immune dysregulation, polyendocrinopathy, enteropathy syndrome                            |
| 42 | Severe combined immunodeficiency screening test                                                    |
| 43 | SCID (severe combined immunodeficiency) screening test                                             |
| 44 | Severe combined immunodeficiency screening declined                                                |
| 45 | SCID (severe combined immunodeficiency) screening declined                                         |
| 46 | Severe combined immunodeficiency screening declined, no history of being screened                  |
| 47 | SCID (severe combined immunodeficiency) screening declined, no history of being screened           |
| 48 | Severe combined immunodeficiency screening declined, screened in UK with no evidence of result     |
| 49 | SCID (severe combined immunodeficiency) screening declined, screened in UK with no evidence of res |
| 50 | Severe combined immunodeficiency screening declined, screened outside UK with no evidence of res   |
| 51 | Suspected severe combined immunodeficiency                                                         |
| 52 | Severe combined immunodeficiency not suspected                                                     |
| 53 |                                                                                                    |
| 54 |                                                                                                    |
| 55 |                                                                                                    |
| 56 |                                                                                                    |
| 57 |                                                                                                    |
| 58 |                                                                                                    |
| 59 |                                                                                                    |
| 60 |                                                                                                    |

1 SCID (severe combined immunodeficiency) not suspected  
2 Severe combined immunodeficiency screening related finding  
3 SCID (severe combined immunodeficiency) screening related finding  
4 Severe combined immunodeficiency not screened for or screening incomplete  
5 SCID (severe combined immunodeficiency) not screened for or screening incomplete  
6 Severe combined immunodeficiency screening, insufficient sample  
7 Severe combined immunodeficiency screening, repeat screening with further sample required  
8 Severe combined immunodeficiency screening, unsuitable sample: date of sample missing  
9 Severe combined immunodeficiency screening, unsuitable sample: date of birth not accurately match  
10 Severe combined immunodeficiency not screened for or screening incomplete: moved out of area  
11 Severe combined immunodeficiency not suspected and other disorders follow up required  
12 Severe combined immunodeficiency not screened for or screening incomplete: not offered  
13 SCID (severe combined immunodeficiency) not screened for or screening incomplete: not offered  
14 X-linked agammaglobulinemia  
15 Hypogammaglobulinemia  
16 Immunoglobulin G4 deficiency  
17 Late onset immunoglobulin deficiency  
18 Immunoglobulin G subclass deficiency  
19 Selective immunoglobulin A deficiency  
20 Selective immunoglobulin M deficiency  
21 Selective immunoglobulin G deficiency  
22 Immunoglobulin subclass deficiency  
23 Immunoglobulin G2 deficiency  
24 Combined immunoglobulin G2 and G4 deficiency  
25 Immunoglobulin G1 deficiency  
26 Immunoglobulin A1 deficiency  
27 Immunoglobulin A2 deficiency  
28  
29  
30  
31  
32  
33  
34  
35  
36  
37  
38  
39  
40  
41  
42  
43  
44  
45  
46  
47  
48  
49  
50  
51  
52  
53  
54  
55  
56  
57  
58  
59  
60

1  
2  
3  
4  
5  
6  
7  
8  
9  
10  
11  
12  
13  
14  
15  
16  
17  
18  
19  
20  
21  
22  
23  
24  
25  
26  
27  
28  
29  
30  
31  
32  
33  
34  
35  
36  
37  
38  
39  
40  
41  
42  
43  
44  
45  
46  
47  
48  
49  
50  
51  
52  
53  
54  
55  
56  
57  
58  
59  
60

;

sult  
ult

For peer review only



1  
2  
3  
4  
5  
6  
7  
8  
9  
10  
11  
12  
13  
14  
15  
16  
17  
18  
19  
20  
21  
22  
23  
24  
25  
26  
27  
28  
29  
30  
31  
32  
33  
34  
35  
36  
37  
38  
39  
40  
41  
42  
43  
44  
45  
46  
47  
48  
49  
50  
51  
52  
53  
54  
55  
56  
57  
58  
59  
60

ed

For peer review only

- 1
- 2 ICD-10 code
- 3 D83.0
- 4 D83.1
- 5 D83.2
- 6 D83.8
- 7 D83.9
- 8 D80.0
- 9 D80.1
- 10 D80.2
- 11 D80.3
- 12 D80.4
- 13 D80.5
- 14 D80.8
- 15 D80.9
- 16 D81.0
- 17 D81.1
- 18 D81.2
- 19 D82.8
- 20 D82.9
- 21 R77.1
- 22
- 23
- 24
- 25
- 26
- 27
- 28
- 29
- 30
- 31
- 32
- 33
- 34
- 35
- 36
- 37
- 38
- 39
- 40
- 41
- 42
- 43
- 44
- 45
- 46
- 47
- 48
- 49
- 50
- 51
- 52
- 53
- 54
- 55
- 56
- 57
- 58
- 59
- 60

For peer review only

1  
2 Term

3 Common variable immunodeficiency with predominant abnormalities of B-cell numbers and function

4 Common variable immunodeficiency with predominant immunoregulatory T-cell disorders

5 Common variable immunodeficiency with autoantibodies to B- or T-cells

6 Other common variable immunodeficiencies

7  
8 Common variable immunodeficiency, unspecified

9 Hereditary hypogammaglobulinemia

10 Nonfamilial hypogammaglobulinemia

11 Selective deficiency of immunoglobulin A [IgA]

12 Selective deficiency of immunoglobulin G [IgG] subclasses

13 Selective deficiency of immunoglobulin M [IgM]

14 Immunodeficiency with increased immunoglobulin M [IgM]

15 Other immunodeficiencies with predominantly antibody defects

16 Immunodeficiency with predominantly antibody defects, unspecified

17 Severe combined immunodeficiency [SCID] with reticular dysgenesis

18 Severe combined immunodeficiency [SCID] with low T- and B-cell numbers

19 Severe combined immunodeficiency [SCID] with low or normal B-cell numbers

20 Immunodeficiency associated with other specified major defects

21 Immunodeficiency associated with major defect, unspecified

22  
23  
24  
25  
26  
27  
28  
29  
30  
31  
32  
33  
34  
35  
36  
37  
38  
39  
40  
41  
42  
43  
44  
45  
46  
47  
48  
49  
50  
51  
52  
53  
54  
55  
56  
57  
58  
59  
60  
Abnormality of globulin

1  
2  
3  
4  
5  
6  
7  
8  
9  
10  
11  
12  
13  
14  
15  
16  
17  
18  
19  
20  
21  
22  
23  
24  
25  
26  
27  
28  
29  
30  
31  
32  
33  
34  
35  
36  
37  
38  
39  
40  
41  
42  
43  
44  
45  
46  
47  
48  
49  
50  
51  
52  
53  
54  
55  
56  
57  
58  
59  
60

n

For peer review only

1  
2 Medcodeid  
3 2622348012  
4 496781000006111  
5 496791000006114  
6 1573641000006119  
7 1761401000006113  
8 1762141000006110  
9 1878421000006117  
10 1878451000006114  
11 287024011  
12 287025012  
13 288186011  
14 376571000006116  
15 825711000006111  
16 825861000006116  
17 1741791000006119  
18 389021000006114  
19 6981941000006110  
20 3904981000006111  
21 3994511000006112  
22 1816791000006117  
23 4596341000006119  
24 3289641000006110  
25 7625181000006111  
26 3951401000006118  
27 4278861000006110  
28 6861201000006112  
29 8023761000006116  
30 4090861000006111  
31 6436261000006116  
32 6602001000006116  
33 7501721000006114  
34 7671061000006119  
35 8223161000006113  
36 4090981000006113  
37 7960981000006112  
38 8024301000006115  
39 4279361000006113  
40 4280421000006113  
41 5588881000006111  
42 6054521000006111  
43 6857291000006118  
44 4091031000006116  
45 4256781000006114  
46 3541151018  
47 4091151000006110  
48 11917161000006117  
49 4279381000006115  
50 3527608016  
51 11917171000006112

For peer review only

1  
2 6436301000006113  
3 3527604019  
4 4279111000006112  
5 4279881000006114  
6 4279131000006118  
7 4090841000006112  
8 6972261000006119  
9 4091111000006114  
10 4279701000006113  
11 7631531000006118  
12 8266821000006110  
13 3994531000006118  
14 6716441000006116  
15 6716431000006114  
16 8022741000006110  
17 6436361000006114  
18 7671111000006118  
19 8694421000006118  
20 4091001000006112  
21 3344261000006112  
22 6052951000006116  
23 3533581011  
24 3916471000006110  
25 8266351000006111  
26 3916491000006111  
27 4090921000006114  
28 6436331000006117  
29 6972271000006114  
30 5009911000006118  
31 3533586018  
32 8694341000006117  
33 4279071000006116  
34 4090891000006115  
35 4091011000006110  
36 3527598017  
37 5143461000006113  
38 9325011000006117  
39 4279901000006111  
40 4279861000006116  
41 8022751000006112  
42 4327461000006117  
43 7671051000006116  
44 1814931000006110  
45 8265311000006115  
46 7522091000006110  
47 11989691000006113  
48 825841000006115  
49 825791000006118  
50 389101000006117  
51 1761381000006113  
52  
53  
54  
55  
56  
57  
58  
59  
60

For peer review only

1  
2 458431000033114  
3 8023751000006118  
4 5084731000006113  
5 4091121000006118  
6 4090791000006114  
7  
8 3541148013  
9 4090911000006118  
10 7791061000006117  
11 317670010  
12 4091081000006115  
13 4279031000006119  
14 5650951000006113  
15 7796951000006110  
16 5009921000006114  
17 7796961000006112  
18 4280491000006110  
19 7326211000006113  
20 4279321000006119  
21 4091041000006114  
22 8694361000006118  
23 6972251000006116  
24 4297871000006114  
25 7961001000006111  
26 8105711000006115  
27 6607631000006119  
28 6671541000006112  
29 6723191000006119  
30 3541143016  
31 6436351000006112  
32 287032015  
33 8342711000006110  
34 3904971000006113  
35 287031010  
36 389111000006119  
37 288174013  
38 1977041000006112  
39 1878431000006119  
40 1878441000006112  
41 1761311000006118  
42 1762131000006117  
43 1762151000006112  
44 825881000006114  
45 825891000006112  
46 4090811000006113  
47 5004491000006116  
48 3082081000006114  
49 4085611000006119  
50 4279211000006118  
51 4091091000006117  
52 6054511000006115

For peer review only

1  
2 5650961000006110  
3 4091171000006117  
4 4327411000006115  
5 4279151000006113  
6 8338681000006110  
7  
8 4297881000006112  
9 3785181000006115  
10 389001000006116  
11 2376041000000113  
12  
13 365853018  
14 459601018  
15 4256461000006111  
16 6436271000006111  
17 7671071000006114  
18  
19 3533587010  
20 4742831000006112  
21 8190391000006119  
22 4085591000006113  
23 1814921000006112  
24  
25 288177018  
26 288182013  
27 1761351000006117  
28 4279921000006118  
29 906841000006112  
30 854381000006118  
31 6436281000006114  
32 4280411000006117  
33 6436371000006119  
34 6857301000006117  
35 6671551000006114  
36 8265981000006111  
37 6436291000006112  
38 2802031000006116  
39 4090881000006118  
40 4279741000006110  
41 4256481000006118  
42 4279721000006115  
43 7671121000006114  
44 6723201000006116  
45 4091131000006115  
46 2802051000006111  
47 8024291000006116  
48 7266641000006112  
49 6436241000006115  
50 5084691000006117  
51 7333141000006111  
52 4090781000006111  
53 4279841000006115  
54 4279821000006110  
55 2963081000006116  
56  
57  
58  
59  
60

For peer review only



1 4280431000006111  
2 3533591017  
3 7796921000006118  
4 1815001000006119  
5 287027016  
6 825731000006117  
7 388991000006116  
8 288178011  
9 288190013  
10 288191012  
11 1761361000006115  
12 908851000006113  
13 257855012  
14 4279291000006111  
15 6280601000006113  
16 7671101000006116  
17 3289651000006112  
18 4091051000006111  
19 5004511000006110  
20 4298901000006113  
21 389011000006118  
22 4090971000006110  
23 4090941000006119  
24 3541141019  
25 4090951000006117  
26 4279781000006116  
27 9186431000006114  
28 6861211000006110  
29 5084711000006119  
30 3082071000006111  
31 4278881000006117  
32 3527596018  
33 4279171000006115  
34 4090831000006119  
35 12626771000006119  
36 4091071000006118  
37 6052971000006114  
38 3528269015  
39 4279801000006117  
40 8694391000006114  
41 4091161000006112  
42 4278971000006114  
43 1814951000006115  
44 2168331000000117  
45 2229631000000112  
46 12031271000006114  
47 1074341000006113  
48 4279341000006114  
49 5009891000006115  
50 11777201000006114  
51  
52  
53  
54  
55  
56  
57  
58  
59  
60

For peer review only

1  
2 7796991000006116  
3 459603015  
4 129081000000115  
5 152322017  
6 829181000006115  
7 7711131000006114  
8 6981961000006114  
9 3515791000006119  
10 4596351000006117  
11 3527607014  
12 3527597010  
13 7705061000006116  
14 7701991000006114  
15 3344251000006110  
16 4090871000006116  
17 4279751000006112  
18 7702801000006118  
19 7708531000006113  
20 4279911000006114  
21 7706051000006111  
22 7708771000006117  
23 7704681000006118  
24 8265821000006115  
25 7702661000006118  
26 7705031000006113  
27 3528268011  
28 2802021000006119  
29 7706061000006113  
30 4278851000006113  
31 7702701000006114  
32 7705441000006114  
33 7704671000006116  
34 7704731000006111  
35 7708731000006115  
36 7960991000006110  
37 7296281000006118  
38 4298821000006112  
39 3533582016  
40 4278961000006119  
41 6671571000006116  
42 7658881000006114  
43 8339341000006117  
44 7333161000006110  
45 7702401000006116  
46 7796971000006117  
47 7960971000006114  
48 7705211000006114  
49 7708371000006116  
50 7713771000006114  
51 7326221000006117  
52  
53  
54  
55  
56  
57  
58  
59  
60

For peer review only

1 3533585019  
2  
3 4279351000006111  
4 4279891000006112  
5 4279121000006116  
6 6671561000006111  
7  
8 7298661000006113  
9 7705431000006116  
10 7658801000006117  
11 7701961000006118  
12 7833241000006116  
13 4091141000006113  
14 7705291000006116  
15 6273011000006115  
16 7702101000006110  
17 8024311000006117  
18 6857331000006113  
19 6601991000006118  
20 4279731000006117  
21 7326231000006119  
22 7704641000006112  
23 7704191000006114  
24 7658891000006112  
25 7705461000006113  
26 4280481000006112  
27 7294881000006114  
28 7704631000006119  
29 3541159016  
30 4279281000006113  
31 5004501000006112  
32 7705271000006117  
33 6436341000006110  
34 7658911000006114  
35 7702471000006110  
36 7705451000006111  
37 3527593014  
38 3785171000006118  
39 6861251000006111  
40 7631511000006112  
41 7671131000006112  
42 7796931000006115  
43 4279831000006113  
44 5073771000006119  
45 3156721000006114  
46 4256451000006114  
47 7702671000006113  
48 8298021000006115  
49 8334851000006112  
50 3994521000006116  
51 5419561000006118  
52 7708591000006112  
53  
54  
55  
56  
57  
58  
59  
60

For peer review only

1  
2 7708581000006114  
3 7708301000006110  
4 3916501000006115  
5 4279791000006118  
6 6272981000006117  
7  
8 7625191000006114  
9 7658791000006118  
10 7671081000006112  
11 4256471000006116  
12 4278871000006115  
13  
14 7707951000006114  
15 7710861000006118  
16 7705281000006119  
17 4090801000006110  
18 4279691000006113  
19 5084741000006115  
20 5650971000006115  
21  
22 264371011  
23 825721000006115  
24 829221000006112  
25 1907831000006117  
26 1907861000006114  
27 4279161000006110  
28 5009881000006118  
29 4332401000006117  
30 7708721000006118  
31 7704691000006115  
32 7705421000006119  
33 7708601000006116  
34 7704721000006113  
35 7708491000006113  
36 7266651000006114  
37 7702111000006113  
38 4279331000006116  
39 7702681000006111  
40 6272961000006110  
41 6054531000006114  
42 4279371000006118  
43 7705301000006115  
44 4279851000006118  
45 4279021000006117  
46 7698531000006117  
47 7702791000006119  
48 7705201000006111  
49 7713781000006112  
50 7787821000006113  
51 5588871000006113  
52 4742841000006119  
53 287020019  
54 287021015  
55  
56  
57  
58  
59  
60

For peer review only

1  
2 2302501000000114  
3 4090931000006112  
4 4280401000006115  
5 5004481000006119  
6 6592361000006110  
7 6857341000006115  
8 7704931000006113  
9 7796981000006119  
10 4091061000006113  
11 4279871000006111  
12 6716421000006111  
13 7787831000006111  
14 7712061000006114  
15 7708291000006114  
16 7791051000006119  
17 7705261000006112  
18 4279201000006116  
19 7658831000006113  
20 4280441000006118  
21 3515863011  
22 6436381000006116  
23 7702381000006116  
24 4279061000006111  
25 7712021000006115  
26 7707941000006112  
27 7702691000006114  
28 4091181000006119  
29 3541157019  
30 3533589013  
31 4332361000006110  
32 7708511000006119  
33 7705001000006117  
34 7708381000006118  
35 7710981000006116  
36 7701771000006111  
37 5084721000006110  
38 6052981000006112  
39 6716411000006115  
40 7719941000006118  
41 5009901000006116  
42 5084681000006115  
43 7702121000006117  
44 7708561000006116  
45 4332411000006119  
46 4742821000006114  
47 1878411000006113  
48 1121631000000110  
49 603931000000114  
50 7501731000006112  
51 143288017

For peer review only

1  
2 765886100006116  
3 770209100006116  
4 770495100006118  
5 822315100006111  
6 932500100006115  
7 643625100006118  
8 3514144017  
9 728950100006117  
10 802273100006117  
11 643631100006111  
12 729448100006112  
13 508470100006117  
14 715541100006113  
15 751159100006117  
16 409085100006114  
17 433238100006117  
18 686124100006114  
19 770496100006116  
20 765885100006118  
21 770242100006114  
22 730854100006116  
23 771088100006111  
24 287029018  
25 82587100006111  
26 627300100006118  
27 409099100006111  
28 728680100006113  
29 770504100006115  
30 771039100006119  
31 729484100006115  
32 765884100006115  
33 427977100006119  
34 769852100006115  
35 765881100006119  
36 672318100006117  
37 826597100006113  
38 770517100006112  
39 408560100006117  
40 287014015  
41 783327100006112  
42 765882100006110  
43 765894100006113  
44 287022010  
45 288185010  
46 1245674100006113  
47 420080100006118  
48 409090100006116  
49 288173019  
50 770486100006112  
51 192421100006112  
52  
53  
54  
55  
56  
57  
58  
59  
60

For peer review only

1 7294691000006113  
2 7631521000006116  
3 6280611000006111  
4 7260251000006113  
5 7704941000006115  
6 4091101000006111  
7 7704181000006111  
8 7702131000006119  
9 7705051000006118  
10 8105701000006118  
11 4327441000006116  
12 7658871000006111  
13 3951391000006115  
14 7294851000006118  
15 3010191000006111  
16 4279711000006111  
17 4279141000006111  
18 7328811000006111  
19 7708571000006111  
20 8266811000006119  
21 7704711000006117  
22 4279101000006114  
23 11887321000006116  
24 7333151000006113  
25 7702651000006115  
26 7702371000006119  
27 3541154014  
28 7813131000006113  
29 7710381000006117  
30 4279311000006110  
31 7708501000006117  
32 7658921000006118  
33 3527603013  
34 4256771000006111  
35 4327391000006115  
36 5143451000006111  
37 3289661000006114  
38 4332371000006115  
39 7702141000006112  
40 7704991000006112  
41 4200811000006115  
42 4327451000006119  
43 3951411000006115  
44 3541153015  
45 7708541000006115  
46 8266341000006114  
47 1907841000006110  
48 4297891000006110  
49 7294491000006110  
50 3082061000006116

For peer review only

1 7307131000006118  
2 7710871000006113  
3 7713761000006119  
4 7708761000006112  
5 7704971000006111  
6 5009931000006112  
7 7625201000006112  
8 7658931000006115  
9 7704701000006115  
10 7484811000006117  
11 7667371000006110  
12 4332391000006119  
13 4090961000006115  
14 4063961000006110  
15 11989701000006113  
16 7294871000006111  
17 7704981000006114  
18 7708311000006113  
19 1121571000000111  
20 287012016  
21 7658901000006111  
22 3533590016  
23 7708521000006110  
24 4091021000006119  
25 5084751000006118  
26 12031261000006119  
27 7796941000006113  
28 4090821000006117  
29 4279811000006119  
30 7704201000006112  
31 7708551000006118  
32 1715721000006111  
33 1812841000006118  
34 1907851000006112  
35 337231000006117  
36 264371011  
37 264418012  
38 3515761000006110  
39 3515801000006118  
40 3515811000006115  
41 474391000006110  
42 474401000006112  
43 6955711000006116  
44 6960951000006115  
45 6973421000006116  
46 6973441000006111  
47 6975941000006117  
48 6981921000006115  
49 825881000006114  
50 825891000006112

For peer review only



1  
2 879271000006114  
3 906841000006112  
4 908851000006113  
5 925451000006113  
6 925771000006110  
7  
8  
9  
10  
11  
12  
13  
14  
15  
16  
17  
18  
19  
20  
21  
22  
23  
24  
25  
26  
27  
28  
29  
30  
31  
32  
33  
34  
35  
36  
37  
38  
39  
40  
41  
42  
43  
44  
45  
46  
47  
48  
49  
50  
51  
52  
53  
54  
55  
56  
57  
58  
59  
60

For peer review only

1  
2 Term  
3 HIV disease resulting in wasting syndrome  
4 Asymptomatic HIV Infection - First Presentation  
5 Asymptomatic HIV Infection - Subsequent Presentation  
6 H/O: HIV  
7  
8 [SHHAPT] Attendance for HIV related care  
9 [SHHAPT] New HIV diagnosis - acute - diagnosed prev. elsewhere  
10 HIV monitoring telephone invite  
11 HIV monitoring third telephone invitation  
12 HIV disease resulting in cytomegaloviral disease  
13 HIV disease resulting in candidiasis  
14 [X]HIV disease resulting in unspecified malignant neoplasm  
15 [X]Dementia in human immunodef virus [HIV] disease  
16 HIV dis reslt/oth mal neopl/lymph,h'matopoetc+reltd tissu  
17 HIV disease resulting/unspcf infectious+parasitic disease  
18 HIV positive general health check service declined  
19 [X]HIV disease resulting in multiple infections  
20 HIV - Human immunodeficiency virus infection wasting syndrome  
21 HIV - Human immunodeficiency virus infection  
22 Asymptomatic HIV infection  
23 HIV disease complicating pregnancy childbirth puerperium  
24 Human immunodeficiency virus (HIV) positive  
25 HIV infection with infectious mononucleosis-like syndrome  
26 HIV 2 RNA  
27 HIV-1  
28 HIV 2 gp125 antibody  
29 Leucoplakia of tongue associated with HIV disease  
30 Human immunodeficiency virus (HIV) infection category B2  
31 HIV CDC category B1  
32 HIV WHO class  
33 HIV - Human immunodeficiency virus encephalitis  
34 Pulmonary arterial hypertension associated with HIV infection  
35 Immunoglobulin G antibody to HIV 1  
36 People with HIV or AIDS  
37 Human immunodeficiency virus (HIV) Centers for Disease Control and Prevention (CDC) category C2 (AIDS)  
38 Invasive carcinoma of uterine cervix co-occurrent with HIV (human immunodeficiency virus) infection  
39 Symptomatic HIV (human immunodeficiency virus) I infection  
40 HIV 1 p66 antibody  
41 HIV-1 antigen  
42 HIV - Congenital human immunodeficiency virus positive status syndrome  
43 Human immunodeficiency virus (HIV) viral load  
44 Hairy leucoplakia of tongue associated with HIV disease  
45 HIV WHO class I  
46 HIV-2 p41  
47 WHO 2007 HIV infection clinical stage 3 and tuberculosis  
48 HIV WHO class IV (AIDS)  
49 [X] HIV disease resulting in haematological and immunological abnormalities, not elsewhere classified  
50 HIV 1 p55 antibody  
51 WHO 2007 HIV infection clinical stage 4  
52 [X]HIV disease resulting in multiple diseases classified elsewhere  
53  
54  
55  
56  
57  
58  
59  
60

1 Human immunodeficiency virus (HIV) World Health Organisation (WHO) class  
2 WHO 2007 HIV infection clinical stage 3  
3 HIV 1 p65 antibody  
4 HIV 1 p18 antibody  
5 HIV 2 p68 antibody  
6 Human immunodeficiency virus (HIV) Centers for Disease Control and Prevention (CDC) category A3 (AIDS)  
7 HIV retinopathy  
8 HIV WHO class III  
9 HIV 1 p31 antibody  
10 Deoxyribonucleic acid of HIV 2  
11 HIV (human immunodeficiency virus) type 2 antiviral resistance measurement by RNA (ribonucleic acid) analys  
12 Asymptomatic HIV infection in pregnancy  
13 HIV infection, pediatric  
14 HIV infection, paediatric  
15 Human immunodeficiency virus (HIV) II infection category B1  
16 Human immunodeficiency virus (HIV) World Health Organization (WHO) class finding  
17 Immunoglobulin G antibody to HIV 2  
18 Hivid 375microgram tablets (Roche Products Ltd) 100 tablet  
19 HIV CDC category C3 (AIDS)  
20 Congenital HIV infection  
21 HIV infection with aseptic meningitis  
22 HIV infection WHO 2007 clinical stage 1 co-occurrent with malaria  
23 HIV infection with acute lymphadenitis  
24 HIV (human immunodeficiency virus) type 1 antiviral resistance measurement by RNA (ribonucleic acid) analys  
25 Human immunodeficiency virus (HIV) infection with acute lymphadenitis  
26 Human immunodeficiency virus (HIV) Centers for Disease Control and Prevention (CDC) category B3 (AIDS)  
27 Human immunodeficiency virus (HIV) Centers for Disease Control and Prevention (CDC) category finding  
28 HIV-associated retinopathy  
29 HIV - Human immunodeficiency virus neuropathy  
30 HIV infection WHO 2007 clinical stage 2 co-occurrent with malaria  
31 Hivid 750microgram tablets (Roche Products Ltd)  
32 HIV 1 p28 antibody  
33 Human immunodeficiency virus (HIV) Centers for Disease Control and Prevention (CDC) category B2  
34 Human immunodeficiency virus (HIV) Centers for Disease Control and Prevention (CDC) category C3 (AIDS)  
35 WHO 2007 HIV infection clinical stage 2  
36 HIV - Human immunodeficiency virus myopathy  
37 HIV (human immunodeficiency virus) in childbirth  
38 HIV 1 gp34 antibody  
39 HIV 1 p53 antibody  
40 Human immunodeficiency virus (HIV) II infection category B2  
41 Human immunodeficiency virus type 2 (HIV-2) antibody  
42 HIV 1 IgG  
43 HIV disease resulting in Kaposi sarcoma  
44 Referral to community HIV (human immunodeficiency virus) nurse specialist  
45 Human immunodeficiency virus (HIV) carrier  
46 HIV disease resulting in mycobacterial infection  
47 HIV disease resulting in unspecified malignant neoplasm  
48 HIV disease resulting in multiple diseases CE  
49 [X]HIV disease resulting/other infectious+parasitic diseases  
50 [SHHAPT] New HIV diagnosis - late

1 Hivid  
2 Human immunodeficiency virus (HIV) infection category B1  
3 HIV - Human immunodeficiency virus diarrhea  
4 Human immunodeficiency virus (HIV) World Health Organisation (WHO) class III  
5 Human immunodeficiency virus (HIV) Centers for Disease Control and Prevention (CDC) category A1  
6 WHO 2007 HIV infection clinical stage 2 and tuberculosis  
7 HIV CDC category B3 (AIDS)  
8 HIV 2 antibody positive and HIV 1 antibody cross-reactivity  
9 [D]Laboratory evidence of human immunodeficiency virus [HIV]  
10 Human immunodeficiency virus (HIV) World Health Organization (WHO) class II  
11 HIV 1 p32 antibody  
12 HIV-related sclerosing cholangitis  
13 Proviral deoxyribonucleic acid of HIV 1  
14 Neuropathy caused by HIV - human immunodeficiency virus  
15 HIV 2 proviral DNA  
16 HIV 1 p24 antigen  
17 HIV 1 phenotyping  
18 HIV 1 p58 antibody  
19 Human immunodeficiency virus (HIV) World Health Organisation (WHO) class I  
20 Hivid 750microgram tablets (Roche Products Ltd) 100 tablet  
21 HIV-related microangiopathy of the retina  
22 HIV 1 identification  
23 Extrapulmonary TB (tuberculosis) co-occurrent with HIV (human immunodeficiency virus) infection  
24 HIV (human immunodeficiency virus) viral load by log rank  
25 HIV 1 nucleic acid detection  
26 Oral hairy leucoplakia associated with HIV disease  
27 HIV EIA test positive  
28 WHO 2007 HIV infection clinical stage 1 and tuberculosis  
29 HIV WHO class finding  
30 HIV disease resulting in lymphoid interstitial pneumonitis  
31 HIV (human immunodeficiency virus) disease resulting in haematological and immunological abnormalities  
32 HIV infection  
33 HIV disease resulting in multiple malignant neoplasms  
34 [X]HIV disease resulting/unspcf infectious+parasitic disease  
35 [X]HIV disease resulting in other bacterial infections  
36 HIV-1/HIV-2 antigen/antibody combination immunoassay positive  
37 HIV monitoring first telephone invitation  
38 HIV monitoring second telephone invitation  
39 [SHHAPT] HIV positive  
40 [SHHAPT] New HIV diagnosis - diagnosed previously elsewhere  
41 [SHHAPT] New HIV diagnosis - late - diagnosed prev. elsewhere  
42 HIV Infection With Symptoms, Not AIDS - First Presentation  
43 HIV Infection With Symptoms, Not AIDS - Subsequent Presentation  
44 HIV CDC category A2  
45 HIV - Human immunodeficiency virus leukoencephalopathy  
46 HIV2 - Human immunodeficiency virus type 2  
47 Human immunodeficiency virus (HIV) p24 antigen  
48 HIV 2 gp80 antibody  
49 Human immunodeficiency virus (HIV) World Health Organisation (WHO) class II  
50 HIV viral load

1 Human immunodeficiency virus HIV-related sclerosing cholangitis  
2 Human immunodeficiency virus (HIV) World Health Organisation (WHO) class IV (acquired immunodeficiency s  
3 HIV-1 Antibody  
4 HIV 2 p56 antibody  
5 HIV-1 (human immunodeficiency virus type 1) subtype identification  
6 Human immunodeficiency virus HIV-1 identification  
7 HIV 2 infection  
8 HIV (human immunodeficiency virus) disease resulting in haematological and immunological abnormalities  
9 HIV (human immunodeficiency virus) drug resistance test  
10 Acute HIV infection  
11 HIV (human immunodeficiency virus) viral load  
12 HIV-1 gp120  
13 Human immunodeficiency virus (HIV) World Health Organization class  
14 Anti-HIV 1 IgG  
15 HIV WHO 2007 infection clinical stage 3 co-occurrent with malaria  
16 HIV - Human immunodeficiency virus infection constitutional disease  
17 HIV (Human immunodeficiency virus) positive general health check service declined - enhanced services admir  
18 HIV p24 antigen  
19 HIV disease resulting in Pneumocystis jirovecii pneumonia  
20 [X]HIV disease resulting in other viral infections  
21 [X]HIV disease resulting in other non-Hodgkin's lymphoma  
22 [SHHAPT] New HIV diagnosis  
23 HIV 1 p15 antibody  
24 [RFC] HIV/AIDS  
25 HIV infection  
26 Human immunodeficiency virus (HIV) World Health Organization (WHO) class  
27 HIV 1 p26 antibody  
28 Human immunodeficiency virus (HIV) World Health Organisation (WHO) class finding  
29 Hairy leukoplakia of tongue associated with HIV disease  
30 Oral hairy leukoplakia associated with HIV disease  
31 HIV (human immunodeficiency virus) 1 genotype determination by RNA (ribonucleic acid) analysis  
32 Human immunodeficiency virus (HIV) World Health Organisation class  
33 HIV  
34 HIV CDC category B2  
35 HIV 1 p17 antibody  
36 HIV-1 gp160  
37 HIV 2 p24 antibody  
38 Anti-HIV 2 IgG  
39 HIV ELISA test positive  
40 Human immunodeficiency virus (HIV) World Health Organization (WHO) class III  
41 HIV - Human immunodeficiency virus  
42 Symptomatic human immunodeficiency virus (HIV) I infection  
43 Increased human immunodeficiency virus (HIV) viral load  
44 HIV CDC category  
45 HIV - Human immunodeficiency virus enteropathy  
46 HIV 1 genotyping  
47 HIV CDC category A1  
48 HIV 2 p41 antibody  
49 HIV 1 p64 antibody  
50 Serologic test for HIV-1

1 Human immunodeficiency virus (HIV) 1 antigen  
 2 HIV WHO 2007 infection clinical stage 4 co-occurrent with malaria  
 3 HIV 1 proviral DNA  
 4 [X]HIV disease resulting in other non-Hodgkin lymphoma  
 5 HIV disease resulting in multiple infections  
 6 HIV disease result/haematological+immunologic abnorms,NEC  
 7 [X]HIV dis reslt/oth mal neopl/lymph,h'matopoetc+reltd tissu  
 8 [X]HIV disease resulting in other mycoses  
 9 [X]HIV disease resulting in other specified conditions  
 10 [X]Unspecified human immunodeficiency virus [HIV] disease  
 11 [SHHAPT] New HIV diagnosis - acute  
 12 [RFC] AIDS/HIV  
 13 HIV positive  
 14 HIV 1 gp105 antibody  
 15 Finding of HIV status  
 16 HIV 2 IgG  
 17 Human immunodeficiency virus (HIV) infection with infectious mononucleosis-like syndrome  
 18 Human immunodeficiency virus (HIV) World Health Organization (WHO) class I  
 19 HIV - Human immunodeficiency virus leucoencephalopathy  
 20 Human immunodeficiency virus (HIV) 2 gp125 antibody assay  
 21 [X]HIV disease resulting in multiple diseases classified elsewhere  
 22 HIV CDC category C2 (AIDS)  
 23 HIV CDC category C1 (AIDS)  
 24 WHO 2007 HIV infection clinical stage 4 and tuberculosis  
 25 Human immunodeficiency virus (HIV) Centers for Disease Control and Prevention (CDC) category C1 (AIDS)  
 26 HIV 1 gp120 antibody  
 27 Hivid  
 28 Leukoplakia of tongue associated with HIV disease  
 29 HIV - Human immunodeficiency virus diarrhoea  
 30 HIV-2  
 31 HIV 2 gp36 antibody  
 32 WHO 2007 HIV infection clinical stage 1  
 33 HIV 2 p26 antibody  
 34 HIV CDC category A3 (AIDS)  
 35 HIV (human immunodeficiency virus) 1 antibody presence in serum  
 36 HIV WHO class II  
 37 Human immunodeficiency virus (HIV) infection with aseptic meningitis  
 38 HIV fusion inhibitor  
 39 HIV 1 gp160 antibody  
 40 Hivid 375microgram tablets (Roche Products Ltd)  
 41 Human immunodeficiency virus (HIV) World Health Organization (WHO) class IV (acquired immunodeficiency s  
 42 HIV 1 p23 antibody  
 43 HIV disease resulting in other types of non-Hodgkin lymphoma  
 44 HIV disease resulting in Burkitt lymphoma  
 45 Seen by community HIV (human immunodeficiency virus) nurse  
 46 HIVEP2 (human immunodeficiency virus type I enhancer binding protein 2) related intellectual disability  
 47 Adverse reaction to Hivid  
 48 HIV 1 p51 antibody  
 49 Neuropathy due to HIV - human immunodeficiency virus  
 50 [X]Hiv disease resulting in hematological and immunological abnormalities, not elsewhere classified

1 Proviral deoxyribonucleic acid of HIV 2  
2 HIV (human immunodeficiency virus) antibody/antigen (Duo)  
3 HIV1 (human immunodeficiency virus 1) antibody level  
4 Asymptomatic human immunodeficiency virus infection  
5 Human immunodeficiency virus with constitutional disease  
6 Burkitt's lymphoma co-occurrent with human immunodeficiency virus infection  
7 Human immunodeficiency virus infection wasting syndrome  
8 Immunodeficiency due to human immunodeficiency virus infection  
9 Human immunodeficiency virus positive  
10 World Health Organization 2007 Human immunodeficiency virus infection clinical stage 4  
11 World Health Organization 2007 Human immunodeficiency virus infection clinical stage 2  
12 Acute endocarditis co-occurrent with human immunodeficiency virus infection  
13 Neuralgia co-occurrent with human immunodeficiency virus infection  
14 Congenital human immunodeficiency virus infection  
15 Human immunodeficiency virus Centers for Disease Control and Prevention category B1  
16 Human immunodeficiency virus, type I glycoprotein 41 antibody  
17 Anemia co-occurrent with human immunodeficiency virus infection  
18 Pyrexia of unknown origin co-occurrent with human immunodeficiency virus infection  
19 Human immunodeficiency virus, type I protein 15 antibody  
20 Infectious gastroenteritis co-occurrent with human immunodeficiency virus infection  
21 Human immunodeficiency virus antibodies positive and p24 antigen positive  
22 Progressive multifocal leukoencephalopathy co-occurrent with human immunodeficiency virus infection  
23 Human immunodeficiency virus 1 ribonucleic acid measurement by nucleic acid amplification test  
24 Strongyloidiasis co-occurrent with human immunodeficiency virus infection  
25 Enlargement of liver co-occurrent with human immunodeficiency virus infection  
26 Human immunodeficiency virus fusion inhibitor  
27 Human immunodeficiency virus  
28 Disorder of central nervous system co-occurrent with human immunodeficiency virus infection  
29 Human immunodeficiency virus, type II glycoprotein 125 antibody  
30 Salmonellosis co-occurrent with human immunodeficiency virus infection  
31 Infection caused by Nocardia co-occurrent with human immunodeficiency virus infection  
32 Progressive multifocal leukoencephalopathy co-occurrent with human immunodeficiency virus infection  
33 Organic brain syndrome co-occurrent with human immunodeficiency virus infection  
34 Reactive for Human immunodeficiency virus antibody  
35 Extrapulmonary tuberculosis co-occurrent with human immunodeficiency virus infection  
36 Human immunodeficiency virus 2 glycoprotein 125 antibody  
37 Measurement of Human immunodeficiency virus 2 glycoprotein 105 antibody  
38 Human immunodeficiency virus World Health Organization 2007 stage 1 co-occurrent with malaria  
39 Human immunodeficiency virus, type I protein 23 antibody  
40 Oral hairy leucoplakia associated with human immunodeficiency virus disease  
41 Antibody to human immunodeficiency virus, type II protein 16  
42 Human immunodeficiency virus IgG avidity  
43 Human immunodeficiency virus 1 genotyping  
44 Myocarditis co-occurrent with human immunodeficiency virus infection  
45 Proviral deoxyribonucleic acid of Human immunodeficiency virus 2  
46 Invasive carcinoma of uterine cervix co-occurrent with human immunodeficiency virus infection  
47 Disorder of peripheral nervous system co-occurrent with human immunodeficiency virus infection  
48 Infection caused by Cytomegalovirus co-occurrent with human immunodeficiency virus infection  
49 Recurrent salmonella septicaemia co-occurrent with human immunodeficiency virus infection  
50 Determination of susceptibility of Human immunodeficiency virus 1 to panel of antiretroviral drugs using phen



1 Human immunodeficiency virus World Health Organization 2007 stage 2 co-occurrent with malaria  
2 Human immunodeficiency virus, type I protein 66 antibody  
3 Human immunodeficiency virus, type I glycoprotein 34 antibody  
4 Human immunodeficiency virus, type II protein 68 antibody  
5 Oral hairy leukoplakia associated with human immunodeficiency virus disease  
6 Human immunodeficiency virus 2 protein 53 antibody  
7 Bacterial pneumonia co-occurrent with human immunodeficiency virus infection  
8 Antibody to human immunodeficiency virus, type I protein 40  
9 Splenomegaly co-occurrent with human immunodeficiency virus infection  
10 Sequela of infection caused by Human immunodeficiency virus  
11 Human immunodeficiency virus World Health Organization class III  
12 Acquired haemolytic anaemia co-occurrent with human immunodeficiency virus infection  
13 Finding of human immunodeficiency virus antibody titre  
14 Candidiasis of esophagus co-occurrent with human immunodeficiency virus infection  
15 Symptomatic human immunodeficiency virus I infection  
16 Hairy leukoplakia of tongue associated with human immunodeficiency virus disease  
17 Human immunodeficiency virus encephalitis  
18 Human immunodeficiency virus, type I protein 17 antibody  
19 Human immunodeficiency virus 1 phenotyping  
20 Disorder of respiratory system co-occurrent with human immunodeficiency virus infection  
21 Disseminated infection caused by Strongyloides co-occurrent with human immunodeficiency virus infection  
22 Human immunodeficiency virus, type II protein 16 antibody  
23 Isosporiasis co-occurrent with human immunodeficiency virus infection  
24 Human immunodeficiency virus, type I protein 24 antigen  
25 Human immunodeficiency virus 2 glycoprotein 120 antibody  
26 Reticulosarcoma co-occurrent with human immunodeficiency virus infection  
27 Human immunodeficiency virus World Health Organization 2007 stage 4 co-occurrent with tuberculosis  
28 Human immunodeficiency virus, type I glycoprotein 105 antibody  
29 Human immunodeficiency virus leukoencephalopathy  
30 Visual impairment co-occurrent with human immunodeficiency virus infection  
31 Human immunodeficiency virus Centers for Disease Control and Prevention category finding  
32 Human immunodeficiency virus, type I glycoprotein 40 Ab  
33 Primary cerebral lymphoma co-occurrent with human immunodeficiency virus infection  
34 Nocardiosis co-occurrent with human immunodeficiency virus infection  
35 World Health Organization 2007 Human immunodeficiency virus infection clinical stage 1  
36 Human immunodeficiency virus II infection  
37 Leucoplakia of tongue associated with human immunodeficiency virus disease  
38 Human immunodeficiency virus 2 DNA  
39 Immunoglobulin G antibody to Human immunodeficiency virus type 2  
40 Proviral deoxyribonucleic acid of Human immunodeficiency virus 1  
41 Human immunodeficiency virus, type II protein 41 antibody  
42 Human immunodeficiency virus-associated periodontitis  
43 Human immunodeficiency virus I infection  
44 Human immunodeficiency virus, type I glycoprotein antigen 120  
45 Disorder of skin co-occurrent with human immunodeficiency virus infection  
46 Facial lipoatrophy associated with human immunodeficiency virus  
47 Human immunodeficiency virus drug resistance test  
48 Asymptomatic human immunodeficiency virus infection in pregnancy  
49 Human immunodeficiency virus antibody  
50 Dermatophytosis co-occurrent with human immunodeficiency virus infection



1 Herpes zoster infection co-occurrent with human immunodeficiency virus infection  
2 Diffuse non-Hodgkin's immunoblastic lymphoma co-occurrent with human immunodeficiency virus infection  
3 Human immunodeficiency virus infection with acute lymphadenitis  
4 Human immunodeficiency virus, type I glycoprotein 160 antibody  
5 Human immunodeficiency virus antibody titer - finding  
6 Human immunodeficiency virus 2 RNA  
7 Human immunodeficiency virus, type I protein 40 Ab  
8 Immunoglobulin G antibody to Human immunodeficiency virus type 1  
9 Human immunodeficiency virus, type 1 glycoprotein antigen 160  
10 Human immunodeficiency virus, type II glycoprotein 36 antibody  
11 Renal failure syndrome co-occurrent with human immunodeficiency virus infection  
12 Opportunistic mycosis co-occurrent with human immunodeficiency virus infection  
13 Infective arthritis co-occurrent with human immunodeficiency virus infection  
14 Human immunodeficiency virus Centers for Disease Control and Prevention category A1  
15 Human immunodeficiency virus, type I protein 31 antibody  
16 Human immunodeficiency virus diarrhea  
17 Human immunodeficiency virus-related sclerosing cholangitis  
18 Human immunodeficiency virus carrier  
19 Non-Hodgkin lymphoma associated with Human immunodeficiency virus infection  
20 Human immunodeficiency virus infection with secondary clinical infectious disease  
21 Human immunodeficiency virus infection monitoring telephone invitation  
22 Human immunodeficiency virus infection monitoring third telephone invitation  
23 Human immunodeficiency virus, type II protein 26 antibody  
24 Neuropathy due to human immunodeficiency virus  
25 Human immunodeficiency virus 1 RNA  
26 Human immunodeficiency virus antibody positive  
27 Presenile dementia co-occurrent with human immunodeficiency virus infection  
28 Demyelinating disease of central nervous system co-occurrent with human immunodeficiency virus infection  
29 Infection caused by Dermatophyte co-occurrent with human immunodeficiency virus infection  
30 Pneumocystosis co-occurrent with human immunodeficiency virus infection  
31 Coccidiosis co-occurrent with human immunodeficiency virus infection  
32 Copies of human immunodeficiency virus ribonucleic acid above reference range  
33 Heart disease co-occurrent with human immunodeficiency virus infection  
34 Human immunodeficiency virus, type I protein 51 antibody  
35 Myelitis co-occurrent with human immunodeficiency virus infection  
36 Human immunodeficiency virus antibody titre - finding  
37 Human immunodeficiency virus viral load  
38 Human immunodeficiency virus, type I protein 55 antibody  
39 Acquired hemolytic anemia co-occurrent with human immunodeficiency virus infection  
40 Human immunodeficiency virus, type I protein 53 antibody  
41 Human immunodeficiency virus, type I protein 32 antibody  
42 Reactive for human immunodeficiency virus p24 antigen  
43 Anaemia co-occurrent with human immunodeficiency virus infection  
44 Recurrent bacterial pneumonia co-occurrent with human immunodeficiency virus infection  
45 Recurrent salmonella septicemia co-occurrent with human immunodeficiency virus infection  
46 Candidiasis of upper respiratory tract co-occurrent with human immunodeficiency virus infection  
47 Congenital human immunodeficiency virus positive status syndrome  
48 Human immunodeficiency virus infection with neurological disease  
49 Human immunodeficiency virus with other clinical findings  
50 Acquired human immunodeficiency virus infection syndrome NOS

1 Human immunodeficiency virus infection monitoring invitation  
2 Human immunodeficiency virus Centers for Disease Control and Prevention category B3 (acquired immunodeficiency)  
3 Human immunodeficiency virus, type I protein 26 antibody  
4 Human immunodeficiency virus leucoencephalopathy  
5 Human immunodeficiency virus encephalopathy  
6 Hairy leucoplakia of tongue associated with human immunodeficiency virus disease  
7 Disorder of spinal cord co-occurrent with human immunodeficiency virus infection  
8 Proviral DNA of Human immunodeficiency virus 2  
9 Human immunodeficiency virus World Health Organization class I  
10 Human immunodeficiency virus, type I protein 18 antibody  
11 Pediatric human immunodeficiency virus infection  
12 Infection of upper respiratory tract caused by *Candida* co-occurrent with human immunodeficiency virus infection  
13 Disseminated atypical infection caused by *Mycobacterium* co-occurrent with human immunodeficiency virus infection  
14 Diffuse non-Hodgkin immunoblastic lymphoma co-occurrent with human immunodeficiency virus infection  
15 Human immunodeficiency virus 2 antibody positive and Human immunodeficiency virus 1 antibody cross-reactive  
16 Agranulocytosis co-occurrent with human immunodeficiency virus infection  
17 Human immunodeficiency virus, type II glycoprotein 80 antibody  
18 Human immunodeficiency virus, type II glycoprotein 140 Ab  
19 Human immunodeficiency virus 1 antigen  
20 Asymptomatic human immunodeficiency virus A2 infection  
21 Human immunodeficiency virus World Health Organization class finding  
22 Skin rash co-occurrent with human immunodeficiency virus infection  
23 Human immunodeficiency virus, type I protein 28 antibody  
24 Multidermatomal infection caused by Herpes zoster co-occurrent with human immunodeficiency virus infection  
25 Nephrotic syndrome co-occurrent with human immunodeficiency virus infection  
26 Infection caused by *Salmonella* co-occurrent with human immunodeficiency virus infection  
27 Human immunodeficiency virus World Health Organization class IV (acquired immunodeficiency syndrome)  
28 Human immunodeficiency virus World Health Organization 2007 stage 3 co-occurrent with tuberculosis  
29 Human immunodeficiency virus World Health Organization 2007 stage 3 co-occurrent with malaria  
30 Human immunodeficiency virus DNA  
31 Infection caused by herpes simplex virus co-occurrent with human immunodeficiency virus infection  
32 Aplastic anemia co-occurrent with human immunodeficiency virus infection  
33 Cytomegalovirus infection co-occurrent with human immunodeficiency virus infection  
34 Focal segmental glomerulosclerosis co-occurrent with human immunodeficiency virus infection  
35 Subacute adenoviral encephalitis co-occurrent with human immunodeficiency virus infection  
36 Human immunodeficiency virus diarrhoea  
37 Human immunodeficiency virus infection with aseptic meningitis  
38 Paediatric human immunodeficiency virus infection  
39 Immune reconstitution inflammatory syndrome caused by human immunodeficiency virus infection  
40 Human immunodeficiency virus neuropathy  
41 Human immunodeficiency virus enteropathy  
42 Disorder of eye proper co-occurrent with human immunodeficiency virus infection  
43 Infection caused by *Aspergillus* co-occurrent with human immunodeficiency virus infection  
44 Human immunodeficiency virus 1 ribonucleic acid  
45 Human immunodeficiency virus infection constitutional disease  
46 Human immunodeficiency virus monitoring admin.  
47 Human immunodeficiency virus annual review  
48 Human immunodeficiency virus viral load by log rank  
49 Pulmonary arterial hypertension associated with human immunodeficiency virus infection  
50 Human immunodeficiency virus infection

1 Anti-Human immunodeficiency virus, type II glycoprotein 140 antibody  
2 Candidiasis of oesophagus co-occurrent with human immunodeficiency virus infection  
3 Nephropathy co-occurrent with human immunodeficiency virus infection  
4 People with human immunodeficiency virus or acquired immune deficiency syndrome  
5 Human immunodeficiency virus in mother complicating childbirth  
6 Human immunodeficiency virus Centers for Disease Control and Prevention category  
7 Asymptomatic human immunodeficiency virus A1 infection  
8 Human immunodeficiency virus I glycoprotein 43 antibody  
9 Human immunodeficiency virus  
10 Human immunodeficiency virus World Health Organization class  
11 Human immunodeficiency virus 2 glycoprotein 34 antibody  
12 Human immunodeficiency virus non-pathogenic diarrhoea  
13 History of asymptomatic human immunodeficiency virus infection  
14 Human immunodeficiency virus Centers for Disease Control and Prevention category B  
15 Human immunodeficiency virus Centers for Disease Control and Prevention category A3 (acquired immunodeficiency)  
16 Human immunodeficiency virus 1 DNA  
17 Leukoplakia of tongue associated with human immunodeficiency virus disease  
18 Gastrointestinal malabsorption syndrome co-occurrent with human immunodeficiency virus infection  
19 Human immunodeficiency virus, type II glycoprotein 140 antibody  
20 Radiculitis co-occurrent with human immunodeficiency virus infection  
21 Human immunodeficiency virus 1 protein 68 antibody  
22 Infection caused by Microsporidia co-occurrent with human immunodeficiency virus infection  
23 Burkitt lymphoma co-occurrent with human immunodeficiency virus infection  
24 Human immunodeficiency virus infection with persistent generalised lymphadenopathy  
25 Finding of human immunodeficiency virus antibody titer  
26 Human immunodeficiency virus Centers for Disease Control and Prevention category C2 (acquired immunodeficiency)  
27 Human immunodeficiency virus 1 protein 24 antibody  
28 Large liver co-occurrent with human immunodeficiency virus infection  
29 Infection caused by Cryptosporidium co-occurrent with human immunodeficiency virus infection  
30 Human immunodeficiency virus 2 protein 31 antibody  
31 Antibody to human immunodeficiency virus, type II glycoprotein 140  
32 Human immunodeficiency virus, type I glycoprotein 120 antibody  
33 Human immunodeficiency virus p24 antigen positive  
34 Human immunodeficiency virus, type I protein 40 antibody  
35 Human immunodeficiency virus enzyme-linked immunosorbent assay test positive  
36 Human immunodeficiency virus 1 genotype determination by ribonucleic acid analysis  
37 Cardiomyopathy co-occurrent with human immunodeficiency virus infection  
38 Human immunodeficiency virus p24 antigen  
39 Malignant neoplastic disease co-occurrent with human immunodeficiency virus infection  
40 Parkinsonism due to human immunodeficiency virus infection  
41 Anti-Human immunodeficiency virus, type I protein 40 antibody  
42 Anti-Human immunodeficiency virus, type I glycoprotein 40 antibody  
43 Symptomatic human immunodeficiency virus infection  
44 Malignant neoplastic disease co-occurrent with human immunodeficiency virus infection  
45 [V]Asymptomatic human immunodeficiency virus infection status  
46 Acute human immunodeficiency virus seroconversion illness  
47 Human immunodeficiency virus Centers for Disease Control and Prevention category B2  
48 [X]Human immunodeficiency virus disease  
49 Candidiasis of mouth co-occurrent with human immunodeficiency virus infection  
50 Human immunodeficiency virus type 1 subtype identification

1 Human immunodeficiency virus 2 protein 58 antibody  
2 Deoxyribonucleic acid of Human immunodeficiency virus 2  
3 Finding of human immunodeficiency virus status  
4 Hepatitis B associated with Human immunodeficiency virus infection  
5 Disorder of kidney co-occurrent with human immunodeficiency virus infection  
6 Human immunodeficiency virus World Health Organization class II  
7 Hemophagocytic syndrome co-occurrent with human immunodeficiency virus infection  
8 Disorder of eye co-occurrent with human immunodeficiency virus infection  
9 Hepatomegaly co-occurrent with human immunodeficiency virus infection  
10 Human immunodeficiency virus viral load by log rank  
11 Human immunodeficiency virus, type II antibody  
12 Human immunodeficiency virus, type II protein 16 Ab  
13 Human immunodeficiency virus type I  
14 Human immunodeficiency virus 2 protein 55 antibody  
15 Human immunodeficiency virus antigen test  
16 Human immunodeficiency virus, type II protein 24 antibody  
17 Human immunodeficiency virus, type II protein 56 antibody  
18 Determination of coreceptor tropism of Human immunodeficiency virus 1  
19 Infection caused by herpes zoster virus co-occurrent with human immunodeficiency virus infection  
20 Human immunodeficiency virus type 2 antiviral resistance measurement by ribonucleic acid analysis  
21 Infection caused by Pneumocystis co-occurrent with human immunodeficiency virus infection  
22 Human immunodeficiency virus, type I protein 65 antibody  
23 H/O asymptomatic human immunodeficiency virus infection  
24 Determination of susceptibility of Human immunodeficiency virus 1 to panel of antiretroviral drugs using geno  
25 Infection caused by Strongyloides co-occurrent with human immunodeficiency virus infection  
26 Eruption of skin co-occurrent with human immunodeficiency virus infection  
27 Human immunodeficiency virus World Health Organization 2007 stage 2 co-occurrent with tuberculosis  
28 Human immunodeficiency virus complicating pregnancy childbirth and the puerperium  
29 Dementia co-occurrent with human immunodeficiency virus infection  
30 Human immunodeficiency virus, type I protein 58 antibody  
31 Infection caused by Coccidia co-occurrent with human immunodeficiency virus infection  
32 Antibody to human immunodeficiency virus, type I glycoprotein 40  
33 World Health Organization 2007 Human immunodeficiency virus infection clinical stage 3  
34 Human immunodeficiency virus, type II protein antigen 41  
35 Human immunodeficiency virus type 1 antibody  
36 Human immunodeficiency virus myopathy  
37 Human immunodeficiency virus infection with infectious mononucleosis-like syndrome  
38 Human immunodeficiency virus deoxyribonucleic acid  
39 Disorder of gastrointestinal tract co-occurrent with human immunodeficiency virus infection  
40 Aplastic anaemia co-occurrent with human immunodeficiency virus infection  
41 Acute human immunodeficiency virus infection  
42 Human immunodeficiency virus type 2 antibody  
43 Human immunodeficiency virus type 1  
44 Human immunodeficiency virus World Health Organization 2007 stage 1 co-occurrent with tuberculosis  
45 Fever of unknown origin co-occurrent with human immunodeficiency virus infection  
46 Human immunodeficiency virus type 1 antiviral resistance measurement by ribonucleic acid analysis  
47 Human immunodeficiency virus infection monitoring first telephone invitation  
48 Human immunodeficiency virus type 1 identification  
49 Human immunodeficiency virus 2 protein 15 antibody  
50 Human immunodeficiency virus type 2  
51

1 Human immunodeficiency virus 2 glycoprotein 36 antibody  
2 Microsporidiosis co-occurrent with human immunodeficiency virus infection  
3 Recurrent salmonella sepsis co-occurrent with human immunodeficiency virus infection  
4 Reactive for both human immunodeficiency virus antibodies and p24 antigen  
5 Neuritis co-occurrent with human immunodeficiency virus infection  
6 Neuropathy caused by human immunodeficiency virus  
7 Ribonucleic acid of Human immunodeficiency virus 2  
8 Human immunodeficiency virus, type I glycoprotein 40 antibody  
9 Polyneuropathy co-occurrent with human immunodeficiency virus infection  
10 Human immunodeficiency virus medication review  
11 Human immunodeficiency virus 1 and virus 2 antibodies and Human immunodeficiency virus 1 p24 antigen co  
12 Human immunodeficiency virus 1 deoxyribonucleic acid  
13 Human immunodeficiency virus Centers for Disease Control and Prevention category C1 (acquired immunodef  
14 Human immunodeficiency virus infection with persistent generalized lymphadenopathy  
15 Human immunodeficiency virus with secondary cancers  
16 Human immunodeficiency virus 2 glycoprotein 105 antibody  
17 Lymphadenopathy co-occurrent with human immunodeficiency virus infection  
18 Immunoblastic lymphoma co-occurrent with human immunodeficiency virus infection  
19 Human immunodeficiency virus monitoring  
20 Human immunodeficiency virus with neurological disease  
21 Anti-Human immunodeficiency virus, type II protein 16 antibody  
22 Human immunodeficiency virus World Health Organization 2007 stage 4 co-occurrent with malaria  
23 Herpes simplex virus infection co-occurrent with human immunodeficiency virus infection  
24 Human immunodeficiency virus Centers for Disease Control and Prevention category C3 (acquired immunodef  
25 Human immunodeficiency virus non-pathogenic diarrhea  
26 Human immunodeficiency virus type I enhancer binding protein 2 related intellectual disability  
27 Proviral DNA of Human immunodeficiency virus 1  
28 Human immunodeficiency virus Centers for Disease Control and Prevention category A2  
29 Human immunodeficiency virus, type I protein 64 antibody  
30 Chronic infection caused by herpes simplex virus co-occurrent with human immunodeficiency virus infection  
31 Aspergillosis co-occurrent with human immunodeficiency virus infection  
32 Human immunodeficiency virus positive general health check service declined  
33 Referral to community human immunodeficiency virus nurse specialist  
34 Human immunodeficiency virus infection monitoring second telephone invitation  
35 [V]Asymptomatic human immunodeficiency virus infection status  
36 aids carrier  
37 notification of aids  
38 aids  
39 aids - acquired immunodeficiency syndrome  
40 acquired immune deficiency syndrome (aids)  
41 aids - first presentation  
42 aids - subsequent presentation  
43 kaposi sarcoma associated with aids  
44 mycobacteriosis associated with aids  
45 dementia associated with aids  
46 aids - acquired immune deficiency syndrome dementia complex  
47 pneumonia associated with aids  
48 cachexia associated with aids  
49 hiv infection with symptoms, not aids - first presentation  
50 hiv infection with symptoms, not aids - subsequent presentation

1  
2 aids +viral/chlamydial dis.nos  
3 [rfc] hiv/aids  
4 [rfc] aids/hiv  
5 aids carrier  
6 notification of aids  
7  
8  
9  
10  
11  
12  
13  
14  
15  
16  
17  
18  
19  
20  
21  
22  
23  
24  
25  
26  
27  
28  
29  
30  
31  
32  
33  
34  
35  
36  
37  
38  
39  
40  
41  
42  
43  
44  
45  
46  
47  
48  
49  
50  
51  
52  
53  
54  
55  
56  
57  
58  
59  
60

For peer review only

1  
2  
3  
4  
5  
6  
7  
8  
9  
10  
11  
12  
13  
14  
15  
16  
17  
18  
19  
20  
21  
22  
23  
24  
25  
26  
27  
28  
29  
30  
31  
32  
33  
34  
35  
36  
37  
38  
39  
40  
41  
42  
43  
44  
45  
46  
47  
48  
49  
50  
51  
52  
53  
54  
55  
56  
57  
58  
59  
60

For peer review only

1  
2  
3  
4  
5  
6  
7  
8  
9  
10  
11  
12  
13  
14  
15  
16  
17  
18  
19  
20  
21  
22  
23  
24  
25  
26  
27  
28  
29  
30  
31  
32  
33  
34  
35  
36  
37  
38  
39  
40  
41  
42  
43  
44  
45  
46  
47  
48  
49  
50  
51  
52  
53  
54  
55  
56  
57  
58  
59  
60

For peer review only



1  
2  
3  
4  
5  
6  
7  
8  
9  
10  
11  
12  
13  
14  
15  
16  
17  
18  
19  
20  
21  
22  
23  
24  
25  
26  
27  
28  
29  
30  
31  
32  
33  
34  
35  
36  
37  
38  
39  
40  
41  
42  
43  
44  
45  
46  
47  
48  
49  
50  
51  
52  
53  
54  
55  
56  
57  
58  
59  
60

For peer review only

1  
2  
3  
4  
5  
6  
7  
8  
9  
10  
11  
12  
13  
14  
15  
16  
17  
18  
19  
20  
21  
22  
23  
24  
25  
26  
27  
28  
29  
30  
31  
32  
33  
34  
35  
36  
37  
38  
39  
40  
41  
42  
43  
44  
45  
46  
47  
48  
49  
50  
51  
52  
53  
54  
55  
56  
57  
58  
59  
60

For peer review only

1  
2  
3  
4  
5  
6  
7  
8  
9  
10  
11  
12  
13  
14  
15  
16  
17  
18  
19  
20  
21  
22  
23  
24  
25  
26  
27  
28  
29  
30  
31  
32  
33  
34  
35  
36  
37  
38  
39  
40  
41  
42  
43  
44  
45  
46  
47  
48  
49  
50  
51  
52  
53  
54  
55  
56  
57  
58  
59  
60

For peer review only

1  
2  
3  
4  
5  
6  
7  
8  
9  
10  
11  
12  
13  
14  
15  
16  
17  
18  
19  
20  
21  
22  
23  
24  
25  
26  
27  
28  
29  
30  
31  
32  
33  
34  
35  
36  
37  
38  
39  
40  
41  
42  
43  
44  
45  
46  
47  
48  
49  
50  
51  
52  
53  
54  
55  
56  
57  
58  
59  
60

For peer review only

1  
2  
3  
4  
5  
6  
7  
8  
9  
10  
11  
12  
13  
14  
15  
16  
17  
18  
19  
20  
21  
22  
23  
24  
25  
26  
27  
28  
29  
30  
31  
32  
33  
34  
35  
36  
37  
38  
39  
40  
41  
42  
43  
44  
45  
46  
47  
48  
49  
50  
51  
52  
53  
54  
55  
56  
57  
58  
59  
60

For peer review only

1  
2  
3  
4  
5  
6  
7  
8  
9  
10  
11  
12  
13  
14  
15  
16  
17  
18  
19  
20  
21  
22  
23  
24  
25  
26  
27  
28  
29  
30  
31  
32  
33  
34  
35  
36  
37  
38  
39  
40  
41  
42  
43  
44  
45  
46  
47  
48  
49  
50  
51  
52  
53  
54  
55  
56  
57  
58  
59  
60

For peer review only

1  
2  
3  
4  
5  
6  
7  
8  
9  
10  
11  
12  
13  
14  
15  
16  
17  
18  
19  
20  
21  
22  
23  
24  
25  
26  
27  
28  
29  
30  
31  
32  
33  
34  
35  
36  
37  
38  
39  
40  
41  
42  
43  
44  
45  
46  
47  
48  
49  
50  
51  
52  
53  
54  
55  
56  
57  
58  
59  
60

For peer review only

1  
2  
3  
4  
5  
6  
7  
8  
9  
10  
11  
12  
13  
14  
15  
16  
17  
18  
19  
20  
21  
22  
23  
24  
25  
26  
27  
28  
29  
30  
31  
32  
33  
34  
35  
36  
37  
38  
39  
40  
41  
42  
43  
44  
45  
46  
47  
48  
49  
50  
51  
52  
53  
54  
55  
56  
57  
58  
59  
60

For peer review only



1  
2  
3  
4  
5  
6  
7  
8  
9  
10  
11  
12  
13  
14  
15  
16  
17  
18  
19  
20  
21  
22  
23  
24  
25  
26  
27  
28  
29  
30  
31  
32  
33  
34  
35  
36  
37  
38  
39  
40  
41  
42  
43  
44  
45  
46  
47  
48  
49  
50  
51  
52  
53  
54  
55  
56  
57  
58  
59  
60

For peer review only

1  
2  
3  
4  
5  
6  
7  
8  
9  
10  
11  
12  
13  
14  
15  
16  
17  
18  
19  
20  
21  
22  
23  
24  
25  
26  
27  
28  
29  
30  
31  
32  
33  
34  
35  
36  
37  
38  
39  
40  
41  
42  
43  
44  
45  
46  
47  
48  
49  
50  
51  
52  
53  
54  
55  
56  
57  
58  
59  
60

ay

For peer review only

## ICD-10 code

1  
2  
3 B20  
4 B20.0  
5 B20.1  
6 B20.2  
7 B20.3  
8 B20.4  
9 B20.5  
10 B20.6  
11 B20.7  
12 B20.8  
13 B20.9  
14 B21  
15 B21.0  
16 B21.1  
17 B21.2  
18 B21.3  
19 B21.7  
20 B21.8  
21 B21.9  
22 B22  
23 B22.0  
24 B22.1  
25 B22.2  
26 B22.7  
27 B23  
28 B23.0  
29 B23.1  
30 B23.2  
31 B23.8  
32 B24  
33 Z21  
34 O98.7  
35 R75  
36 Z71.7  
37  
38  
39  
40  
41  
42  
43  
44  
45  
46  
47  
48  
49  
50  
51  
52  
53  
54  
55  
56  
57  
58  
59  
60

|    |                                                                                                   |
|----|---------------------------------------------------------------------------------------------------|
| 1  |                                                                                                   |
| 2  | Term                                                                                              |
| 3  | Human immunodeficiency virus [HIV] disease resulting in infectious and parasitic diseases         |
| 4  | HIV disease resulting in mycobacterial infection                                                  |
| 5  | HIV disease resulting in other bacterial infections                                               |
| 6  | HIV disease resulting in cytomegaloviral disease                                                  |
| 7  | HIV disease resulting in other viral infections                                                   |
| 8  | HIV disease resulting in candidiasis                                                              |
| 9  | HIV disease resulting in other mycoses                                                            |
| 10 | HIV disease resulting in Pneumocystis jirovecii pneumonia                                         |
| 11 | HIV disease resulting in multiple infections                                                      |
| 12 | HIV disease resulting in other infectious and parasitic diseases                                  |
| 13 | HIV disease resulting in unspecified infectious or parasitic disease                              |
| 14 | Human immunodeficiency virus [HIV] disease resulting in malignant neoplasms                       |
| 15 | HIV disease resulting in Kaposi sarcoma                                                           |
| 16 | HIV disease resulting in Burkitt lymphoma                                                         |
| 17 | HIV disease resulting in other types of non-Hodgkin lymphoma                                      |
| 18 | HIV disease resulting in other malignant neoplasms of lymphoid, haematopoietic and related tissue |
| 19 | HIV disease resulting in multiple malignant neoplasms                                             |
| 20 | HIV disease resulting in other malignant neoplasms                                                |
| 21 | HIV disease resulting in unspecified malignant neoplasm                                           |
| 22 | Human immunodeficiency virus [HIV] disease resulting in other specified diseases                  |
| 23 | HIV disease resulting in encephalopathy                                                           |
| 24 | HIV disease resulting in lymphoid interstitial pneumonitis                                        |
| 25 | HIV disease resulting in wasting syndrome                                                         |
| 26 | HIV disease resulting in multiple diseases classified elsewhere                                   |
| 27 | Human immunodeficiency virus [HIV] disease resulting in other conditions                          |
| 28 | Acute HIV infection syndrome                                                                      |
| 29 | HIV disease resulting in (persistent) generalized lymphadenopathy                                 |
| 30 | HIV disease resulting in haematological and immunological abnormalities, not elsewhere classified |
| 31 | HIV disease resulting in other specified conditions                                               |
| 32 | Unspecified human immunodeficiency virus [HIV] disease                                            |
| 33 | Asymptomatic human immunodeficiency virus [HIV] infection status                                  |
| 34 | Human immunodeficiency virus [HIV] disease complicating pregnancy, childbirth and the puerperium  |
| 35 | Laboratory evidence of human immunodeficiency virus [HIV]                                         |
| 36 | Human immunodeficiency virus [HIV] counselling                                                    |
| 37 |                                                                                                   |
| 38 |                                                                                                   |
| 39 |                                                                                                   |
| 40 |                                                                                                   |
| 41 |                                                                                                   |
| 42 |                                                                                                   |
| 43 |                                                                                                   |
| 44 |                                                                                                   |
| 45 |                                                                                                   |
| 46 |                                                                                                   |
| 47 |                                                                                                   |
| 48 |                                                                                                   |
| 49 |                                                                                                   |
| 50 |                                                                                                   |
| 51 |                                                                                                   |
| 52 |                                                                                                   |
| 53 |                                                                                                   |
| 54 |                                                                                                   |
| 55 |                                                                                                   |
| 56 |                                                                                                   |
| 57 |                                                                                                   |
| 58 |                                                                                                   |
| 59 |                                                                                                   |
| 60 |                                                                                                   |

1  
2  
3  
4  
5  
6  
7  
8  
9  
10  
11  
12  
13  
14  
15  
16  
17  
18  
19  
20  
21  
22  
23  
24  
25  
26  
27  
28  
29  
30  
31  
32  
33  
34  
35  
36  
37  
38  
39  
40  
41  
42  
43  
44  
45  
46  
47  
48  
49  
50  
51  
52  
53  
54  
55  
56  
57  
58  
59  
60

m

For peer review only

|    |                  |
|----|------------------|
| 1  |                  |
| 2  | Medcodeid        |
| 3  | 41398015         |
| 4  | 297177019        |
| 5  | 297179016        |
| 6  | 297180018        |
| 7  | 297181019        |
| 8  | 2674605012       |
| 9  | 2692565012       |
| 10 | 299241000000110  |
| 11 | 300141000000119  |
| 12 | 315671000000110  |
| 13 | 641211000000118  |
| 14 | 641301000000114  |
| 15 | 695191000006119  |
| 16 | 699671000000115  |
| 17 | 699731000000110  |
| 18 | 699791000000111  |
| 19 | 699911000000117  |
| 20 | 905781000006118  |
| 21 | 908811000006112  |
| 22 | 983261000006119  |
| 23 | 983291000006110  |
| 24 | 983301000006111  |
| 25 | 983311000006114  |
| 26 | 1148911000000120 |
| 27 | 1674121000000120 |
| 28 | 1674381000000110 |
| 29 | 1674661000000120 |
| 30 | 1674971000000120 |
| 31 | 1675051000000110 |
| 32 | 1679791000006110 |
| 33 | 1682241000006110 |
| 34 | 1747821000006120 |
| 35 | 1747831000006120 |
| 36 | 1747851000006110 |
| 37 | 1747861000006110 |
| 38 | 1757431000000110 |
| 39 | 1855101000006110 |
| 40 | 1858501000006110 |
| 41 | 1863341000006120 |
| 42 | 2262931000000120 |
| 43 | 2894411000006110 |
| 44 | 3865621000006110 |
| 45 | 3865631000006110 |
| 46 | 4769281000006110 |
| 47 | 5006891000006110 |
| 48 | 5006901000006110 |
| 49 | 5006911000006110 |
| 50 | 5006921000006120 |
| 51 | 5552111000006120 |

For peer review only

1  
2 7045281000006110  
3 7058051000006120  
4 7092351000006110  
5 7510741000006110  
6 7567771000006120  
7 7861151000006120  
8 145513018  
9 297130012  
10 345068012  
11 486695013  
12 905801000006119  
13 908821000006116  
14 3101701000006120  
15 3101721000006110  
16 3875981000006110  
17 136302010  
18 151829017  
19 297580012  
20 297581011  
21 297582016  
22 3988991000006110  
23 5006031000006120  
24 7263021000006120  
25 7559221000006110  
26 14195861000006100  
27  
28  
29  
30  
31  
32  
33  
34  
35  
36  
37  
38  
39  
40  
41  
42  
43  
44  
45  
46  
47  
48  
49  
50  
51  
52  
53  
54  
55  
56  
57  
58  
59  
60

For peer review only

|    |                                                                  |
|----|------------------------------------------------------------------|
| 1  |                                                                  |
| 2  | Term                                                             |
| 3  | Multiple sclerosis                                               |
| 4  | Multiple sclerosis of the spinal cord                            |
| 5  | Generalised multiple sclerosis                                   |
| 6  | Exacerbation of multiple sclerosis                               |
| 7  | Multiple sclerosis NOS                                           |
| 8  | Secondary progressive multiple sclerosis                         |
| 9  | Primary progressive multiple sclerosis                           |
| 10 | Multiple sclerosis review                                        |
| 11 | Multiple sclerosis care plan agreed                              |
| 12 | Multiple sclerosis multidisciplinary review                      |
| 13 | Benign multiple sclerosis                                        |
| 14 | Malignant multiple sclerosis                                     |
| 15 | Multiple sclerosis of the brain stem                             |
| 16 | Management of multiple sclerosis in onset phase                  |
| 17 | Management of multiple sclerosis in early disease phase          |
| 18 | Management of multiple sclerosis in stable disability phase      |
| 19 | Management of multiple sclerosis in palliative phase             |
| 20 | [RFC] Multiple sclerosis                                         |
| 21 | [RFC] Multiple sclerosis                                         |
| 22 | Multiple sclerosis - personal health plan                        |
| 23 | Multiple sclerosis - primary progressive                         |
| 24 | Multiple sclerosis - secondary progressive                       |
| 25 | Multiple sclerosis - relapsing remitting                         |
| 26 | Multiple sclerosis review declined                               |
| 27 | Multiple sclerosis monitoring administration                     |
| 28 | Multiple sclerosis monitoring first letter                       |
| 29 | Multiple sclerosis monitoring second letter                      |
| 30 | Multiple sclerosis monitoring telephone invitation               |
| 31 | Multiple sclerosis monitoring third letter                       |
| 32 | Management of multiple sclerosis in progressive disability phase |
| 33 | Relapsing remitting multiple sclerosis                           |
| 34 | Multiple sclerosis monitoring administration                     |
| 35 | Multiple sclerosis monitoring first letter                       |
| 36 | Multiple sclerosis monitoring third letter                       |
| 37 | Multiple sclerosis monitoring telephone invite                   |
| 38 | Referral to community multiple sclerosis team                    |
| 39 | Multiple sclerosis questionnaire completed                       |
| 40 | Suspected multiple sclerosis                                     |
| 41 | Referral by Multiple Sclerosis nurse specialist                  |
| 42 | Suspected multiple sclerosis                                     |
| 43 | MS - Multiple sclerosis                                          |
| 44 | Acute disseminated encephalomyelitis                             |
| 45 | ADEM - Acute disseminated encephalomyelitis                      |
| 46 | Multiple sclerosis of the brainstem                              |
| 47 | Acute relapsing multiple sclerosis                               |
| 48 | Chronic progressive multiple sclerosis                           |
| 49 | Multiple sclerosis (MS) chronic/progressive                      |
| 50 | Remittent-progressive multiple sclerosis                         |
| 51 | Kurtzke multiple sclerosis rating scale                          |
| 52 |                                                                  |
| 53 |                                                                  |
| 54 |                                                                  |
| 55 |                                                                  |
| 56 |                                                                  |
| 57 |                                                                  |
| 58 |                                                                  |
| 59 |                                                                  |
| 60 |                                                                  |



1  
2 Multiple sclerosis (MS) secondary progressive  
3 Multiple sclerosis (MS) relapsing remitting  
4 Multiple sclerosis (MS) primary progressive  
5 Dementia associated with multiple sclerosis  
6 Multiple sclerosis clinic  
7 Progressive relapsing multiple sclerosis  
8 Foster-Kennedy syndrome  
9 Motor neurone disease NOS  
10 Kennedy syndrome  
11 Motor neurone disease  
12 [RFC] Motor neurone disease  
13 [RFC] Motor neurone disease  
14 Motor neuron disease  
15 MND - Motor neurone disease  
16 Lower motor neuron disease  
17 Neonatal myasthenia gravis  
18 Myasthenia gravis  
19 Persistent neonatal myasthenia gravis  
20 Juvenile or adult myasthenia gravis  
21 Myasthenia gravis NOS  
22 MG - Myasthenia gravis  
23 Late onset Huntington's disease  
24 Dementia due to Huntingtons disease  
25 Huntington disease-like syndrome  
26 Huntington disease  
27  
28  
29  
30  
31  
32  
33  
34  
35  
36  
37  
38  
39  
40  
41  
42  
43  
44  
45  
46  
47  
48  
49  
50  
51  
52  
53  
54  
55  
56  
57  
58  
59  
60

|    | ICD-10 code | Term                                                     |
|----|-------------|----------------------------------------------------------|
| 1  |             |                                                          |
| 2  |             |                                                          |
| 3  | G35         | Multiple sclerosis                                       |
| 4  | G12.2       | Motor neuron disease                                     |
| 5  | G12.20      | Motor neuron disease - Unspecified                       |
| 6  | G12.21      | Motor neuron disease - Amyotrophic lateral sclerosis     |
| 7  | G12.22      | Motor neuron disease - Progressive bulbar palsy          |
| 8  | G12.23      | Motor neuron disease - Primary lateral sclerosis         |
| 9  | G12.24      | Motor neuron disease - Familial motor neuron disease     |
| 10 | G12.25      | Motor neuron disease - Progressive spinal muscle atrophy |
| 11 | G12.29      | Motor neuron disease - Other motor neuron disease        |
| 12 |             |                                                          |
| 13 | G70.0       | Myasthenia gravis                                        |
| 14 | G70.00      | Myasthenia gravis - without (acute) exacerbation         |
| 15 | G70.01      | Myasthenia gravis - with (acute) exacerbation            |
| 16 | G10         | Huntington's disease                                     |
| 17 |             |                                                          |
| 18 |             |                                                          |
| 19 |             |                                                          |
| 20 |             |                                                          |
| 21 |             |                                                          |
| 22 |             |                                                          |
| 23 |             |                                                          |
| 24 |             |                                                          |
| 25 |             |                                                          |
| 26 |             |                                                          |
| 27 |             |                                                          |
| 28 |             |                                                          |
| 29 |             |                                                          |
| 30 |             |                                                          |
| 31 |             |                                                          |
| 32 |             |                                                          |
| 33 |             |                                                          |
| 34 |             |                                                          |
| 35 |             |                                                          |
| 36 |             |                                                          |
| 37 |             |                                                          |
| 38 |             |                                                          |
| 39 |             |                                                          |
| 40 |             |                                                          |
| 41 |             |                                                          |
| 42 |             |                                                          |
| 43 |             |                                                          |
| 44 |             |                                                          |
| 45 |             |                                                          |
| 46 |             |                                                          |
| 47 |             |                                                          |
| 48 |             |                                                          |
| 49 |             |                                                          |
| 50 |             |                                                          |
| 51 |             |                                                          |
| 52 |             |                                                          |
| 53 |             |                                                          |
| 54 |             |                                                          |
| 55 |             |                                                          |
| 56 |             |                                                          |
| 57 |             |                                                          |
| 58 |             |                                                          |
| 59 |             |                                                          |
| 60 |             |                                                          |

STROBE Statement—Checklist of items that should be included in reports of *cohort studies*

Andersen et al (2023): Persons Diagnosed with COVID in England in the Clinical Practice Research Datalink (CPRD): A Cohort Description

|                              | Item No | Recommendation                                                                                                                                                                                    | Page No  |
|------------------------------|---------|---------------------------------------------------------------------------------------------------------------------------------------------------------------------------------------------------|----------|
| <b>Title and abstract</b>    | 1       | (a) Indicate the study's design with a commonly used term in the title or the abstract                                                                                                            | 1        |
|                              |         | (b) Provide in the abstract an informative and balanced summary of what was done and what was found                                                                                               | 2-3      |
| <b>Introduction</b>          |         |                                                                                                                                                                                                   |          |
| Background/rationale         | 2       | Explain the scientific background and rationale for the investigation being reported                                                                                                              | 4        |
| Objectives                   | 3       | State specific objectives, including any prespecified hypotheses                                                                                                                                  | 4        |
| <b>Methods</b>               |         |                                                                                                                                                                                                   |          |
| Study design                 | 4       | Present key elements of study design early in the paper                                                                                                                                           | 5        |
| Setting                      | 5       | Describe the setting, locations, and relevant dates, including periods of recruitment, exposure, follow-up, and data collection                                                                   | 5        |
| Participants                 | 6       | (a) Give the eligibility criteria, and the sources and methods of selection of participants. Describe methods of follow-up                                                                        | 5        |
|                              |         | (b) For matched studies, give matching criteria and number of exposed and unexposed                                                                                                               | N/A      |
| Variables                    | 7       | Clearly define all outcomes, exposures, predictors, potential confounders, and effect modifiers. Give diagnostic criteria, if applicable                                                          | 6-9      |
| Data sources/<br>measurement | 8*      | For each variable of interest, give sources of data and details of methods of assessment (measurement). Describe comparability of assessment methods if there is more than one group              | 6-9      |
| Bias                         | 9       | Describe any efforts to address potential sources of bias                                                                                                                                         | 6-9      |
| Study size                   | 10      | Explain how the study size was arrived at                                                                                                                                                         | 5        |
| Quantitative variables       | 11      | Explain how quantitative variables were handled in the analyses. If applicable, describe which groupings were chosen and why                                                                      | 9        |
| Statistical methods          | 12      | (a) Describe all statistical methods, including those used to control for confounding                                                                                                             | 9        |
|                              |         | (b) Describe any methods used to examine subgroups and interactions                                                                                                                               | 9        |
|                              |         | (c) Explain how missing data were addressed                                                                                                                                                       | 7, 9     |
|                              |         | (d) If applicable, explain how loss to follow-up was addressed                                                                                                                                    | N/A      |
|                              |         | (e) Describe any sensitivity analyses                                                                                                                                                             | N/A      |
| <b>Results</b>               |         |                                                                                                                                                                                                   |          |
| Participants                 | 13*     | (a) Report numbers of individuals at each stage of study—eg numbers potentially eligible, examined for eligibility, confirmed eligible, included in the study, completing follow-up, and analysed | eTable 6 |
|                              |         | (b) Give reasons for non-participation at each stage                                                                                                                                              | eTable 6 |
|                              |         | (c) Consider use of a flow diagram                                                                                                                                                                | eTable 6 |
| Descriptive data             | 14*     | (a) Give characteristics of study participants (eg demographic, clinical, social) and information on exposures and potential confounders                                                          | 10-11    |

|    |                          |                                                                                                                                                                                                                       |                                      |
|----|--------------------------|-----------------------------------------------------------------------------------------------------------------------------------------------------------------------------------------------------------------------|--------------------------------------|
| 1  |                          | (b) Indicate number of participants with missing data for each variable of                                                                                                                                            | Shown<br>in<br>every<br>table<br>N/A |
| 2  |                          | interest                                                                                                                                                                                                              |                                      |
| 3  |                          | (c) Summarise follow-up time (eg, average and total amount)                                                                                                                                                           |                                      |
| 4  |                          |                                                                                                                                                                                                                       |                                      |
| 5  | Outcome data             | 15* Report numbers of outcome events or summary measures over time                                                                                                                                                    | 11                                   |
| 6  |                          |                                                                                                                                                                                                                       |                                      |
| 7  |                          |                                                                                                                                                                                                                       |                                      |
| 8  |                          |                                                                                                                                                                                                                       |                                      |
| 9  |                          |                                                                                                                                                                                                                       |                                      |
| 10 | Main results             | 16 (a) Give unadjusted estimates and, if applicable, confounder-adjusted estimates and their<br>precision (eg, 95% confidence interval). Make clear which confounders were adjusted for<br>and why they were included | N/A                                  |
| 11 |                          | (b) Report category boundaries when continuous variables were categorized                                                                                                                                             | N/A                                  |
| 12 |                          | (c) If relevant, consider translating estimates of relative risk into absolute risk for a<br>meaningful time period                                                                                                   | N/A                                  |
| 13 |                          |                                                                                                                                                                                                                       |                                      |
| 14 | Other analyses           | 17 Report other analyses done—eg analyses of subgroups and interactions, and sensitivity<br>analyses                                                                                                                  | N/A                                  |
| 15 |                          |                                                                                                                                                                                                                       |                                      |
| 16 |                          |                                                                                                                                                                                                                       |                                      |
| 17 |                          |                                                                                                                                                                                                                       |                                      |
| 18 |                          |                                                                                                                                                                                                                       |                                      |
| 19 |                          |                                                                                                                                                                                                                       |                                      |
| 20 |                          |                                                                                                                                                                                                                       |                                      |
| 21 | <b>Discussion</b>        |                                                                                                                                                                                                                       |                                      |
| 22 | Key results              | 18 Summarise key results with reference to study objectives                                                                                                                                                           | 12-<br>13                            |
| 23 |                          |                                                                                                                                                                                                                       |                                      |
| 24 | Limitations              | 19 Discuss limitations of the study, taking into account sources of potential bias or imprecision.<br>Discuss both direction and magnitude of any potential bias                                                      | 14-<br>15                            |
| 25 |                          |                                                                                                                                                                                                                       |                                      |
| 26 | Interpretation           | 20 Give a cautious overall interpretation of results considering objectives, limitations,<br>multiplicity of analyses, results from similar studies, and other relevant evidence                                      | 15-<br>16                            |
| 27 |                          |                                                                                                                                                                                                                       |                                      |
| 28 | Generalisability         | 21 Discuss the generalisability (external validity) of the study results                                                                                                                                              | 12-<br>13                            |
| 29 |                          |                                                                                                                                                                                                                       |                                      |
| 30 |                          |                                                                                                                                                                                                                       |                                      |
| 31 | <b>Other information</b> |                                                                                                                                                                                                                       |                                      |
| 32 | Funding                  | 22 Give the source of funding and the role of the funders for the present study and, if<br>applicable, for the original study on which the present article is based                                                   | 18                                   |
| 33 |                          |                                                                                                                                                                                                                       |                                      |
| 34 |                          |                                                                                                                                                                                                                       |                                      |

35  
36 \*Give information separately for exposed and unexposed groups.

37  
38  
39 **Note:** An Explanation and Elaboration article discusses each checklist item and gives methodological background and  
40 published examples of transparent reporting. The STROBE checklist is best used in conjunction with this article (freely  
41 available on the Web sites of PLoS Medicine at <http://www.plosmedicine.org/>, Annals of Internal Medicine at  
42 <http://www.annals.org/>, and Epidemiology at <http://www.epidem.com/>). Information on the STROBE Initiative is  
43 available at <http://www.strobe-statement.org>.

44  
45  
46  
47  
48  
49  
50  
51  
52  
53  
54  
55  
56  
57  
58  
59  
60

# BMJ Open

## Persons Diagnosed with COVID-19 in England in the Clinical Practice Research Datalink (CPRD): A Cohort Description

|                                 |                                                                                                                                                                                                                                                                                                                                                                                                     |
|---------------------------------|-----------------------------------------------------------------------------------------------------------------------------------------------------------------------------------------------------------------------------------------------------------------------------------------------------------------------------------------------------------------------------------------------------|
| Journal:                        | <i>BMJ Open</i>                                                                                                                                                                                                                                                                                                                                                                                     |
| Manuscript ID                   | bmjopen-2023-073866.R2                                                                                                                                                                                                                                                                                                                                                                              |
| Article Type:                   | Original research                                                                                                                                                                                                                                                                                                                                                                                   |
| Date Submitted by the Author:   | 05-Dec-2023                                                                                                                                                                                                                                                                                                                                                                                         |
| Complete List of Authors:       | Andersen, Kathleen; Pfizer Inc<br>McGrath, Leah; Pfizer Inc<br>Reimbaeva, Maya; Pfizer Inc<br>Mendes, Diana; Pfizer Ltd<br>Nguyen, Jennifer; Pfizer Inc<br>Rai, Kiran; Adelphi Real World<br>Tritton, Theo; Adelphi Real World<br>Tsang, Carmen; Pfizer Ltd<br>Malhotra, Deepa; Pfizer Inc<br>Yang, Jingyan; Pfizer Inc; Columbia University, Institute for Social and Economic Research and Policy |
| <b>Primary Subject Heading</b>: | Infectious diseases                                                                                                                                                                                                                                                                                                                                                                                 |
| Secondary Subject Heading:      | Epidemiology                                                                                                                                                                                                                                                                                                                                                                                        |
| Keywords:                       | COVID-19, Primary Health Care, Epidemiology < TROPICAL MEDICINE                                                                                                                                                                                                                                                                                                                                     |
|                                 |                                                                                                                                                                                                                                                                                                                                                                                                     |

SCHOLARONE™  
Manuscripts

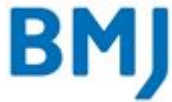

I, the Submitting Author has the right to grant and does grant on behalf of all authors of the Work (as defined in the below author licence), an exclusive licence and/or a non-exclusive licence for contributions from authors who are: i) UK Crown employees; ii) where BMJ has agreed a CC-BY licence shall apply, and/or iii) in accordance with the terms applicable for US Federal Government officers or employees acting as part of their official duties; on a worldwide, perpetual, irrevocable, royalty-free basis to BMJ Publishing Group Ltd ("BMJ") its licensees and where the relevant Journal is co-owned by BMJ to the co-owners of the Journal, to publish the Work in this journal and any other BMJ products and to exploit all rights, as set out in our [licence](#).

The Submitting Author accepts and understands that any supply made under these terms is made by BMJ to the Submitting Author unless you are acting as an employee on behalf of your employer or a postgraduate student of an affiliated institution which is paying any applicable article publishing charge ("APC") for Open Access articles. Where the Submitting Author wishes to make the Work available on an Open Access basis (and intends to pay the relevant APC), the terms of reuse of such Open Access shall be governed by a Creative Commons licence – details of these licences and which [Creative Commons](#) licence will apply to this Work are set out in our licence referred to above.

Other than as permitted in any relevant BMJ Author's Self Archiving Policies, I confirm this Work has not been accepted for publication elsewhere, is not being considered for publication elsewhere and does not duplicate material already published. I confirm all authors consent to publication of this Work and authorise the granting of this licence.

1  
2  
3 **PERSONS DIAGNOSED WITH COVID-19 IN ENGLAND IN THE**  
4 **CLINICAL PRACTICE RESEARCH DATALINK (CPRD):**  
5 **A COHORT DESCRIPTION**  
6  
7  
8  
9

10 Kathleen M. Andersen, PhD MSc;<sup>1</sup> Leah J. McGrath, PhD;<sup>1</sup> Maya Reimbaeva, MS;<sup>1</sup>  
11 Diana Mendes, PhD;<sup>2</sup> Jennifer L. Nguyen, ScD MPH MHCI;<sup>1</sup>  
12 Kiran K. Rai, PhD;<sup>3</sup> Theo Tritton, MSc;<sup>3</sup> Carmen Tsang, PhD;<sup>2</sup>  
13 Deepa Malhotra, MS;<sup>1</sup> Jingyan Yang, DrPH MHS<sup>1,4</sup>  
14  
15  
16  
17

- 18 1. Pfizer Inc, New York, NY 10001
- 19 2. Pfizer Ltd, Tadworth, UK
- 20 3. Adelphi Real World, Bollington, UK
- 21 4. Institute for Social and Economic Research and Policy, Columbia University,  
22 New York, NY 10027  
23  
24  
25  
26  
27  
28

29 **Corresponding Author:**

30 Kathleen M. Andersen, PhD  
31 Director, mRNA Vaccines Real World Evidence  
32 Pfizer Inc.  
33 New York, NY  
34 Phone: 443-540-9961  
35 Email: [kathleen.andersen@pfizer.com](mailto:kathleen.andersen@pfizer.com)  
36  
37  
38  
39  
40  
41  
42

43 Length: text 4,049; tables and figures 5  
44  
45  
46  
47  
48  
49  
50  
51  
52  
53  
54  
55  
56  
57  
58  
59  
60

**ABSTRACT (347/400 words)**

Objective: To create case definitions for confirmed COVID-19 diagnoses, COVID-19 vaccination status, and three separate definitions of high risk of severe COVID-19, as well as to assess whether the implementation of these definitions in a cohort reflected the sociodemographic and clinical characteristics of COVID-19 epidemiology in England.

Design: Retrospective cohort study

Setting: Electronic healthcare records from primary care (Clinical Practice Research Datalink, or CPRD) linked to secondary care data (Hospital Episode Statistics, or HES) data covering 24% of the population in England

Participants: 2,271,072 persons aged 1 year and older diagnosed with COVID-19 in CPRD Aurum between August 1, 2020 through January 31, 2022.

Main Outcome Measures: Age, sex, and regional distribution of COVID-19 cases and COVID-19 vaccine doses received prior to diagnosis were assessed separately for the cohorts of cases identified in primary care and those hospitalized for COVID-19 (primary diagnosis code of ICD-10 U07.1 "COVID-19"). Smoking status, body mass index and Charlson Comorbidity Index were compared for the two cohorts, as well as for three separate definitions of high risk of severe disease used in the United Kingdom (NHS Highest Risk, PANORAMIC trial eligibility, UK Health Security Agency Clinical Risk prioritization for vaccination).

Results: Compared to national estimates, CPRD case estimates underrepresented older adults in both the primary care (age 65-84: 6% in CPRD vs 9% nationally) and hospitalized (31% vs 40%) cohorts, and overrepresented people living in regions with the highest median wealth areas of England (20% primary care and 20% hospital admitted cases in South East, vs 15% nationally). The majority of non-hospitalized cases and all hospitalized cases had not completed primary series vaccination. In primary care, persons meeting high risk definitions were older, more often smokers, overweight or obese, and had higher Charlson Comorbidity Index score.

Conclusions: CPRD primary care data is a robust real-world data source and can be used for some COVID-19 research questions, however limitations of the data availability should be carefully considered. Included in this publication are supplemental files for a



total of over 28,000 codes to define each of three definitions of high risk of severe disease.

## STRENGTHS AND LIMITATIONS OF THIS STUDY

- This study used the Clinical Practice Research Datalink (CPRD), a longitudinal and anonymized EHR database of primary health care interactions in England.
- Definitions were built using reproducible methods with independent local clinician review.
- Results were compared to government published COVID-19 case and vaccination counts to evaluate external validity of this data source.
- Limitations of the data include data recency lag, with primary care data ending in April 2022 and hospitalization data ending in March 2021.
- Owing to the primary care setting of the data, this study does not represent people without a general practitioner, or those who presented directly to hospital without a prior COVID-19-related primary care encounter.

## INTRODUCTION

As of 3 February 2023, there have been over 20 million confirmed COVID-19 cases and more than 183,000 related deaths in England.[1] COVID-19 severity ranges from asymptomatic cases to severe disease requiring hospital admission and sometimes death, with older adults and people with chronic health conditions at disproportionate risk.[2,3] Therefore, electronic health records (EHR) with longstanding capture of patients' medical history are uniquely positioned to answer population-based questions related to healthcare resource utilization, economic impact, and pharmaceutical intervention associated with COVID-19.

The Clinical Practice Research Datalink (CPRD) is a longitudinal and anonymized EHR database of primary health care interactions in England.[4] Primary care is the cornerstone of healthcare in England, with over 98% of the population registered with a general practitioner (GP). From August 2020 through March 2022, all tests booked via the National Health Service (NHS) website for polymerase chain reaction (PCR) tests for SARS-CoV-2, regardless of result, were reported to GP offices that use the EMIS electronic health record software.[5] Similarly, COVID-19 vaccines administered at any location in the country were also mandated to be reported to patient's GP.[6] Thus, during this period, CPRD can be considered a closed network of confirmed COVID-19 cases for persons in the network, with accurate information on COVID-19 vaccination status.

While the CPRD has been used in over 3,000 peer-reviewed publications, it is not known whether interruptions in healthcare, particularly in-person primary care visits, during the first years of the coronavirus pandemic affected the previously described characteristics of the CPRD population. The objective of this study was to create case definitions for COVID-19 diagnoses, COVID-19 vaccination, and three separate definitions of high risk of severe COVID-19. Second, we aimed to evaluate these definitions in a sample of persons with COVID-19, using the CPRD, to assess whether this cohort's sociodemographic and clinical characteristics were generalizable to

1  
2  
3 population-level COVID-19 epidemiology in England. The methodology developed in the  
4 study can be leveraged in future COVID-19 research in CPRD data.  
5  
6  
7

## 8 **METHODS**

### 9 **Study Setting and Population**

10 CPRD Aurum contains data which is routinely collected from primary care practices that  
11 use the EMIS Web® digital clinical system that includes electronic patient records.[7]  
12 The May 2022 release of CPRD Aurum contained data from approximately 24% of  
13 persons in England.[8,9] Data captured include age, sex, body weight, medical  
14 diagnoses, referrals to specialists and/or secondary care, prescriptions issued in  
15 primary care, laboratory tests, vaccinations administered, smoking and alcohol  
16 consumption status, and all other types of care delivered as part of routine primary care  
17 practice.  
18  
19  
20  
21  
22  
23  
24  
25  
26

27 CPRD Aurum was linked to Hospital Episode Statistics Admitted Patient Care (HES  
28 APC) records, using deterministic patient-level linkage with an 8-stage algorithm carried  
29 out by NHS Digital. Over 99% of practices contributing to CPRD Aurum participate in  
30 HES linkage. The HES APC dataset includes patient demographics, date and method of  
31 hospital admission and discharge, diagnoses, specialty care, and procedures. HES  
32 APC data from April 1997 to March 2021 was available in this study.  
33  
34  
35  
36  
37  
38  
39

### 40 **Inclusion and Exclusion Criteria**

41 We included persons of any age diagnosed with COVID-19 (described below) from 1  
42 August 2020 through 31 January 2022. First, we required records to be of acceptable  
43 research quality, as defined by CPRD. Second, we required people to be continuously  
44 registered with their GP practice for at least 365 days prior to COVID-19 diagnosis, to  
45 establish pre-COVID-19 health history. Third, we required persons to be HES APC  
46 linkage eligible to ensure the exclusion of patients where confirmed hospital admission  
47 status (via HES APC, during the time period available) could not be known. Fourth, we  
48 excluded persons who were admitted to the hospital with a primary diagnosis of U07.1  
49 on or before their primary care recorded date of COVID-19 diagnosis. Due to mandatory  
50  
51  
52  
53  
54  
55  
56  
57  
58  
59  
60

1  
2  
3 reporting guidelines, the GP's date of notification from the hospital may be delayed from  
4 the date of true test collection and therefore may not accurately reflect date of  
5 diagnosis. Lastly, we excluded persons with a registration end date, practice last  
6 collection date or death date that was prior to their COVID-19 diagnosis.  
7  
8  
9

### 10 11 12 **COVID-19 Case Definition**

13 With each monthly data release, CPRD publishes feasibility counts for SARS-CoV-2  
14 related codes in CPRD primary care data with corresponding code lists.[8,10] The code  
15 types include vaccination, tests (including PCR, antibody and antigen tests), diagnosis,  
16 advice, possible cases, and post-COVID-19 clinic referral codes. Three reviewers (KA,  
17 QM, AS) independently screened the CPRD code list to determine which of the codes  
18 represented a confirmed and current infection. Discrepancies were adjudicated by a  
19 fourth reviewer (LM), and the final definition for the COVID-19 case definition was  
20 reviewed by UK and non-UK clinicians (**Supplemental file 1, Table 1**). We defined a  
21 current and confirmed COVID-19 episode as a diagnosis code, positive PCR, or antigen  
22 test. We did not include COVID-19 vaccination, antibody tests, possible cases,  
23 exposure to COVID-19 or post-COVID-19 clinic referral codes in the COVID-19 case  
24 definition.  
25  
26  
27  
28  
29  
30  
31  
32  
33  
34  
35

36 Hospitalizations for COVID-19 were defined as persons admitted with a primary  
37 diagnosis of COVID-19 (ICD-10 U07.1 "COVID-19") within 12 weeks of the initial  
38 diagnosis recorded in primary care. Non-hospitalized COVID-19 cases were defined as  
39 the subset of persons for whom secondary care data were available but had no record  
40 of hospital admission. Primary care COVID-19 cases were defined as persons who  
41 were not admitted to the hospital within 12 weeks of diagnosis, and those after April 1,  
42 2021 for which hospital admission data were not available.  
43  
44  
45  
46  
47  
48  
49

### 50 51 52 **COVID-19 Vaccination Definition**

53 The first COVID-19 vaccine dose in England was administered on 8 December 2020,  
54 with the initially limited supply prioritized for groups as outlined by the Joint Committee  
55 for Vaccinations and Immunisations (JCVI).[11] In England, COVID-19 vaccines  
56  
57  
58  
59  
60

1  
2  
3 produced by Pfizer-BioNTech and Moderna have been available since December 2020.  
4 In April 2021, JCVI announced that persons who received a first dose of an  
5 AstraZeneca vaccine would receive a second dose of the same brand but persons who  
6 had not yet received a vaccine dose would be “preferentially offered an alternative”.<sup>[12]</sup>  
7 This study did not consider Novavax vaccinations, as it was approved for use after our  
8 index date, or the Janssen or Valneva vaccines, which have not been used in England  
9 as of February 2023.<sup>[13]</sup>  
10  
11  
12  
13  
14  
15  
16

17 In Phase 1 (December 2020 - March 2021), people aged 50 and older, as well as front-  
18 line health and social care workers, clinically extremely vulnerable persons and persons  
19 aged 16 and older with underlying health conditions were eligible to receive two doses.  
20 In Phase 2 (beginning April 2021), access broadened for persons aged 18-49 to receive  
21 two doses. Additionally, immunocompromised persons who received two doses in  
22 phase 1 were recommended to receive a third dose at least eight weeks after their  
23 second dose in order to complete their primary series. Phase 3 included a single dose  
24 for 16–17-year-olds in August 2021. In September 2021, 12–15-year-olds could receive  
25 a single dose and a booster dose for adults was recommended at least 6 months after  
26 the completion of a primary series. In November 2021, 12–17-year-olds could receive a  
27 second dose, and the recommendation for booster dose was shortened to at least 3  
28 months after the completion of a primary series.<sup>[11]</sup>  
29  
30  
31  
32  
33  
34  
35  
36  
37  
38

39 We used a combination of product codes, which specify brand and dose of vaccine, as  
40 well as medical codes which indicated administration of a non-specific COVID-19  
41 vaccine (**Supplemental file 1, Table 2**). The code lists were derived from the published  
42 set by CPRD.<sup>[10]</sup> While patients may have multiple vaccination codes in their record on  
43 a given day, such as a code to indicate both the administration as well as a separate  
44 code for the specific product given, persons were not counted as receiving as more than  
45 one vaccine dose per day.  
46  
47  
48  
49  
50  
51  
52

53 Vaccination status at COVID-19 diagnosis date was reported, regardless of brand, and  
54 separately for immunocompromised versus non-immunocompromised persons.  
55  
56  
57  
58  
59  
60

1  
2  
3 Persons were considered unvaccinated if there was no record of COVID-19 vaccination,  
4 or for up to 13 days after first dose to account for time needed to build immunity  
5 following immunisation. Dose 1 was defined starting 14 days after the record of the first  
6 COVID-19 vaccine administration until 13 days after the receipt of second dose, or until  
7 end of follow-up. Dose 2 was defined starting 14 days after the record of the second  
8 COVID-19 vaccine administration and administered at least 21 days after the first dose.  
9 Persons were considered to have had 2 doses until 13 days before their next vaccine.  
10 For non-immunocompromised persons, the primary vaccination series was complete 14  
11 days after second dose. For immunocompromised persons only, dose 3 was part of  
12 their primary series at least 21 days after their second dose. First booster doses (winter  
13 2021) were defined 21 or more days after the receipt of the last dose in primary series.  
14 For all vaccination definitions, no upper limit on time between doses was applied.  
15  
16  
17  
18  
19  
20  
21  
22  
23  
24  
25

### 26 **COVID-19 Risk Status**

27 We considered three separate definitions of COVID-19 risk status, each of which are set  
28 forth by different groups and capture non-intersecting populations. First, the NHS  
29 highest risk group, which was a list of conditions set forth by an advisory group  
30 commissioned by England's Deputy Chief Medical Officer to identify persons at the very  
31 highest risk of COVID-19 hospital admission and death.[14] Second, eligibility for the  
32 PANORAMIC study, which began in December 2021 and is a platform randomized trial  
33 of antiviral therapeutic agents.[15] The persons who qualify for antiviral treatment in the  
34 trial are those at a higher risk of hospital admission and death. Third, UK Health  
35 Security Agency (UKHSA) clinical risk groups as outlined in "The Green Book" chapter  
36 14a, which is COVID-19 vaccination prioritization from the JCVI.[16] For each of these  
37 three risk definitions, we operationalized the clinical conditions lists into SNOMED and  
38 ICD-10 code lists. Where available, we used published code lists.[17–23] For concepts  
39 not found in the literature, we developed wildcard-based search terms in the CPRD  
40 code browser (**Supplemental file 1, Tables 3-5**). At least one practicing clinician from  
41 the UK, who were independent and external to Pfizer, reviewed each of the search term  
42 strategies, as well as ensuing code lists.  
43  
44  
45  
46  
47  
48  
49  
50  
51  
52  
53  
54  
55  
56  
57  
58  
59  
60

### Comparison to Publicly Available Data

We compared our results to estimates published on the UK Government's Coronavirus dashboard, and restricted results to those specific to England, as the CPRD Aurum population that is HES-linkage eligible contains data from England only.[24,25] The data in this manuscript reflect figures from the dashboard as accessed on 31 January 2023. Where possible, we restricted the dashboard to cases from 1 August 2020 through 31 January 2022 to reflect the study period, although age, sex and region-specific estimates were reported "since the start of the pandemic".[24,25] For whole country (non-COVID-19 related) comparisons, we used the Office of National Statistics' 2021 Census.[9]

### Statistical Analyses

All results are presented separately for the cohorts of persons with primary care versus hospitalized COVID-19 cases. Continuous variables are presented as means (standard deviations) or medians (interquartile ranges) and categorical variables as counts (percentages). Missing data for sex, region, smoking status and BMI is shown in tables. The absence of codes for comorbidities was assumed to be the absence of the comorbidity rather than missing data. Standardized mean differences (SMD) were used to compare groups, with SMD > 10% indicating significant difference. As per CPRD privacy rules, any cell with 10 persons or fewer (but not zero) was suppressed and other cells related to the small cell count were redacted to ensure no back-calculation could populate the count.

Data management and analyses for this study used SAS, version 9.4 (SAS Institute, Cary, North Carolina).

### Patient and Public Involvement

There were no directly involved patients or public involvement in this study.

## RESULTS



1  
2  
3 From 1 August 2020 through 31 January 2022, the UK Government's Coronavirus  
4 dashboard reported 14,744,991 COVID-19 cases in England.[24] The final CPRD  
5 cohort contained 2,271,072 persons diagnosed with COVID-19, regardless of care  
6 setting, in England in the same time period (**Supplemental file 1, Table 6**). The case  
7 trends followed national estimates, with a series of peaks and troughs with a large peak  
8 in winter 2021 (**Supplemental file 1, Figures 1 and 2**). Hospital admissions increased  
9 in fall 2020 and winter 2020 (**Supplemental file 1, Figure 3**).

10  
11  
12  
13  
14  
15  
16  
17 There were 2,257,907 persons with COVID-19 cases observed in primary care, which  
18 included persons who were not hospitalized during the period of time for which hospital  
19 admission data was available (n=522,288) as well as all COVID-19 diagnoses recorded  
20 in the period where hospital admission data ended (n=1,735,619). Separately, there  
21 were 13,165 persons (2% of COVID-19 cases from August 2020 to March 2021) who  
22 were hospitalized within 12 weeks of initial COVID-19 diagnosis with a primary  
23 diagnosis of COVID-19 (**Figure 1**).

### 30 31 **Characteristics of COVID-19 Cases**

32 For both primary care and hospitalized cases, the majority of persons with COVID-19 in  
33 CPRD were adults aged 18-64 (**Table 1**). The age distribution of CPRD primary care  
34 cases generally followed the national case count distribution, with young and middle-  
35 aged adults representing the largest groups, as well as the largest fraction of the  
36 English population (**Supplemental file 1, Table 7**). Older adults were underrepresented  
37 in both cohorts as compared to national population estimates. Within the primary care  
38 cohort, 6% of patients were aged 65-84 years, whereas 9% of national COVID-19 cases  
39 occurred in this age group. Notable differences were observed in the hospitalized cohort  
40 when compared to the national estimates; 31% vs. 40% were aged 65 - 84 years, and  
41 8% vs. 21% aged  $\geq 85$  years, respectively.

42  
43  
44  
45  
46  
47  
48  
49  
50  
51 The sex distribution of COVID-19 cases in the primary care cohort was comparable to  
52 national estimates, with 55% female in each (**Table 1 and Supplemental file 1, Table**



1  
2  
3 **7)**. There were more males (57%) than females in the hospitalized cohort; there are no  
4 national sex-specific hospital admission counts available.  
5  
6  
7

8 The regional distributions of the CPRD primary care and hospitalized cohorts were  
9 similar to each other, but not the overall country. Both of the study cohorts had larger  
10 proportions of persons with GP practices in higher income regions of England as  
11 compared to national case counts.[26] For example, 20% of persons in the primary care  
12 cohort and 20% in the hospitalized cohort lived in South East region of England, the  
13 region with the highest median total household wealth as reported in March 2020. This  
14 is compared to 20% of CPRD contributing practices, 15% of all English cases and 16%  
15 of the population lived in London (**Supplemental file 1, Table 8**). Similar trends are  
16 seen with lower median total household wealth regions being proportionally  
17 underrepresented in the COVID-19 CPRD cohort as compared to national case  
18 estimates or population distribution.  
19  
20  
21  
22  
23  
24  
25  
26  
27  
28

### 29 **COVID-19 Vaccination Status**

30 At the time of COVID-19 diagnosis, 27% of non-immunocompromised persons and 36%  
31 of immunocompromised persons had completed a primary series of COVID-19  
32 vaccination (**Table 2**). Among the non-immunocompromised hospitalized COVID-19  
33 cases, 98% were unvaccinated and none had completed a primary series. For  
34 immunocompromised hospitalized COVID-19 cases, 56% were unvaccinated, 44% had  
35 received one dose, and none had completed a primary series. As of 1 December 2021,  
36 86% of adults had  $\geq 1$  and 80% had  $\geq 2$  COVID-19 vaccine doses (2% and 0.2% lower  
37 than official reports, respectively).  
38  
39  
40  
41  
42  
43  
44  
45

### 46 **Populations at Risk of Severe Disease**

47 After wildcard searches, clinicians reviewed nearly 50,000 codes to set the definitions  
48 for high-risk lists. The final lists contained 12,390 codes for NHS Highest Risk, 9,132  
49 codes for PANORAMIC trial criteria and 7,343 codes for UKHSA Clinical Risk (**code  
50 lists available upon reasonable request**). In the primary care cohort, 11% met NHS  
51 Highest Risk, 31% PANORAMIC, and 10% UKHSA Clinical Risk criteria (**Table 3**). With  
52  
53  
54  
55  
56  
57  
58  
59  
60

1  
2  
3 each definition, primary care cohort cases at high risk were more often current smokers  
4 (ranging from 17-21% vs 13% in full cohort) or former smokers (24-28% vs 13%),  
5 overweight (16-19%, vs 9%) or obese (20-28%, vs 10%), and a larger proportion had at  
6 least 1 comorbidity in the Charlson Index (29-54%, vs 11%), where this was recorded.  
7  
8 Primary care cases at high risk of severe disease were also older (mean age 49-55  
9 years, vs 34 years), more often female (55-63%, vs 54%), and had more recorded  
10 vaccine doses prior to COVID-19 diagnosis (**Supplemental file 1, Table 9**).

11  
12  
13  
14  
15  
16  
17 Among hospitalized COVID-19 cases, 33% met NHS Highest Risk, 84% PANORAMIC,  
18 and 41% UKHSA Clinical Risk criteria's (**Table 4**). The high risk hospitalized groups  
19 were similar to the overall hospitalized cohort. Nearly half of persons were current  
20 smokers (13-16%, vs 13%) or former smokers (32-39%, vs 29%), and more than half  
21 were overweight (20-23%, vs 18%) or obese (37-42%, vs 35%). Among the hospital  
22 admitted cohort, people meeting each high-risk definition were older (mean age 65-66  
23 years, vs 60 years) (**Supplemental file 1, Table 10**). Subgroups of patients with the  
24 NHS and UKHSA definitions had higher mean Charlson Comorbidity Indexes, and more  
25 females, than high risk patients identified with the PANORAMIC criteria or the entire  
26 hospitalized population.  
27  
28  
29  
30  
31  
32  
33  
34  
35

## 36 DISCUSSION

### 37 Key Results

38  
39 In this work, we defined and benchmark results from three key variables related to  
40 COVID-19 research using CPRD: index COVID-19 diagnoses, COVID-19 vaccinations,  
41 and persons at high risk of severe disease.  
42  
43  
44  
45  
46  
47

48 We identified 2,271,072 COVID-19 cases in CPRD Aurum between 1 August 2020  
49 through 31 January 2022. Younger age and lower socioeconomic deprivation have  
50 been consistently associated with reductions in COVID-19 incidence and  
51 severity.[27,28] These factors may explain why this CPRD cohort, which proportionally  
52 underrepresented persons age 65 and older and overrepresented persons living in the  
53  
54  
55  
56  
57  
58  
59  
60

1  
2  
3 regions with higher median total household wealth, captured 15% of COVID-19 cases in  
4 a database that covers 24% of persons in England. The requirement for an NHS  
5 number in order for results to be shared may explain some of this attrition as well.  
6  
7 Future work using CPRD for COVID-19 research will need to consider these limitations  
8  
9 of under ascertainment of cases. Moving beyond this study's time period, the transition  
10  
11 to at home testing, as well as the end of free PCR testing for the general public on April  
12  
13 1, 2022, will need to be additionally considered.  
14  
15

16  
17 This manuscript reports results from a case definition of confirmed and current infection.  
18 We did not include codes for immunoglobulin titers, as measurable antibodies indicate a  
19 resolved infection rather than date of onset. We did not include codes indicating a  
20 sequela of prior infection, as these most often occur on a later date than index  
21 diagnosis. We did not include codes indicating a test without a result, as people with a  
22 negative test result should not be included in a COVID-19 case definition. Our results  
23 therefore identified fewer cases, although with greater specificity, than other studies in  
24 published literature that allow for such heterogeneity.[29]  
25  
26  
27  
28  
29  
30  
31

32 COVID-19 vaccination events were well captured in the CPRD. This stands in stark  
33 contrast to most administrative claims and EHR databases in the United States, where  
34 less than 50% of COVID-19 vaccines are recorded in comparison to estimates provided  
35 by the Centers for Disease Control and Prevention.[30,31] England's national  
36 healthcare system, as well as the NHS data infrastructure to facilitate capture of  
37 COVID-19-related events and longstanding structure of general practitioners as the  
38 central node in a person's healthcare coordination, enabled the high coverage of  
39 COVID-19 vaccination records. Researchers can be more confident with CPRD data  
40 that the absence of a vaccination record indicates unvaccinated status than they  
41 otherwise would be with most other real-world datasets, which is a critical consideration  
42 for studies related to COVID-19 disease burden, vaccination, or treatments.  
43  
44  
45  
46  
47  
48  
49  
50  
51

52  
53 The proportion of persons who had completed primary series vaccination prior to  
54 infection was low among primary care cases. Notably, among hospitalized cases, no  
55  
56  
57  
58  
59  
60

1  
2  
3 patients had completed a primary COVID-19 vaccination series. These findings may be  
4 explained by several factors. First, the COVID-19 vaccine was first made available in  
5 England on 8 December 2020, and initially second doses were given up to 12 weeks  
6 later to maximize limited supply for as many people as possible. Therefore, the calendar  
7 period under study allowed for most persons to have had a COVID-19 diagnosis in  
8 periods at which “full vaccination” was not achievable. Second, it is possible that one  
9 vaccine offered protection against severe illness.[32–34]  
10  
11  
12  
13  
14  
15  
16

17 We operationalized a total of over 28,000 codes, from an initial set of nearly 50,000, for  
18 three definitions of persons at risk of severe disease. We have made the search terms  
19 available, for reproducibility, as well as the resulting code lists, for other research  
20 groups to implement in their work. After the completion of this work, NHS Digital  
21 published a code list for “Targeted Conditions”, which includes each element in the NHS  
22 Highest Risk category. Among these, the NHS code list can be repurposed for 4 of the  
23 14 conditions in PANORAMIC criteria and 3 of the 11 conditions in UKHSA Clinical  
24 Risk. To our knowledge, we offer the first publication of code lists for capture of all  
25 elements in the PANORAMIC criteria as well as UKHSA Clinical Risk criteria for these  
26 high-risk definitions, which can now be readily used in datasets that contain CPRD  
27 medical and product, ICD-10 and OPCS Classification of Interventions and Procedures  
28 codes.  
29  
30  
31  
32  
33  
34  
35  
36  
37  
38

39 While there are similarities between the three definitions, differences do exist. In the  
40 example of renal disease, NHS Highest Risk defines as chronic kidney disease stage 4  
41 or 5, PANORAMIC trial criteria stipulate stage 2 or 3, and UKHSA Clinical Risk are for  
42 stages 3-5. PANORAMIC trial eligibility capture persons with mild renal disease, as  
43 some antiviral treatments are not approved for use in persons with severe renal  
44 disease. However, UKHSA Clinical Risk prioritized vaccination access for persons at  
45 highest risk of disease, which would include persons with more advanced renal disease.  
46 Notably, persons who have renal disease as defined by PANORAMIC trial criteria by  
47 definition do not have renal disease by NHS definition, and people in each of these may  
48 (or may not) meet UKHSA prioritization. The choice of which high risk definition to  
49  
50  
51  
52  
53  
54  
55  
56  
57  
58  
59  
60

1  
2  
3 implement in future studies will need to be guided by the study population and research  
4 question.  
5  
6  
7

8 In the primary care cases, persons at high risk were older, more often smokers, had  
9 larger body sizes, and higher Charlson Comorbidity Indices from the overall group of  
10 primary care cases. Among hospitalized cases, the high-risk groups were similar to the  
11 entire hospitalized group. These findings are consistent with existing understanding of  
12 high-risk definitions, and perhaps provide reassurance that the code lists measure the  
13 purported phenomenon.  
14  
15  
16  
17  
18  
19

20 The study periods in this report represent the most recent data available from CPRD as  
21 of 3 February 2023. During the Autumn of 2022, the Aurum database experienced data  
22 quality issues related to the EMIS data flows from legacy systems, and no primary care  
23 data have been made available to researchers since the May 2022 release (data  
24 through March 2022, with some early view of April 2022). Separately, HES secondary  
25 care data have not been updated since March 2021, as NHS Digital has undergone a  
26 change in the way they process and link data. COVID-19 remains a serious disease for  
27 some people, and it is certain that some of the 1.7 million persons diagnosed with  
28 COVID-19 after April 1, 2021 would have been later admitted for COVID-19, but we do  
29 not have the hospital admission data to distinguish them from those whose cases were  
30 managed entirely in the community setting. Throughout, we have used the term  
31 “primary care records” as the combined groups of those known to be non-hospitalized  
32 (cases where HES data were available, but the person was not hospitalized), as well as  
33 those who we have GP encounters for but unknown eventual hospital admission status.  
34 It is difficult to approximate the number of hospital admissions that would be expected  
35 with full data availability. Carrying forward the 2% hospital admission incidence seen in  
36 the early pandemic period may not be appropriate, given 2021 introduced periods of  
37 increased (delta variant) and decreased (omicron variant) risk of hospital admission, as  
38 well the uptake of COVID-19 vaccinations and antiviral treatments. Finally, the  
39 population structure of this cohort outlined in this work further challenge the direct  
40 application of national estimates to CPRD cohorts.  
41  
42  
43  
44  
45  
46  
47  
48  
49  
50  
51  
52  
53  
54  
55  
56  
57  
58  
59  
60

1  
2  
3  
4  
5 The present study does not capture persons not under GP care such as prisoners,  
6 some residential homes, and persons without a place of residence. Additionally, CPRD  
7 Aurum, when linked with HES data, reduces the population to persons registered at  
8 eligible GP practices in England and therefore may not represent persons in other  
9 countries in the UK, or countries outside the UK. This study does not include persons  
10 who presented directly to hospital without any prior GP interaction. In particular, persons  
11 with more severe disease such as older adults may require immediate hospital  
12 admission before seeking primary care, which could explain some of the gaps in  
13 representation we have reported. Given that CPRD is a primary care database, and the  
14 limited time period of hospital data availability, we decided to design our study as an  
15 initial cohort of persons with primary care records of COVID-19. Studies looking for  
16 complete capture of all hospitalized COVID-19 patients might consider other data  
17 sources.  
18  
19  
20  
21  
22  
23  
24  
25  
26  
27  
28

## 29 **CONCLUSION**

30  
31 In conclusion, we present a cohort of over 2 million COVID-19 cases in linked CPRD-  
32 HES data, using published definitions for COVID-19 cases, vaccinations, and each of  
33 three UK-specific definitions of persons at increased risk of severe disease. CPRD  
34 primary care data is a robust real-world data source and can be used for COVID-19  
35 related research questions; however, limitations of the data availability should be  
36 carefully considered.  
37  
38  
39  
40  
41  
42  
43  
44  
45  
46  
47  
48  
49  
50  
51  
52  
53  
54  
55  
56  
57  
58  
59  
60

## ACKNOWLEDGEMENT

### Conflict of Interest Statement

Dr Andersen, Dr McGrath, Ms Reimbaeva, Dr Mendes, Dr Nguyen, Dr Tsang, Ms Malhotra and Dr Yang are employees of Pfizer Inc or Pfizer Ltd and may hold Pfizer stock or stock options. Dr Rai and Mr Tritton are employees of Adelphi Real World which has received consulting fees from Pfizer Inc.

The authors gratefully acknowledge Bethany Backhouse, Poppy Payne, Elke Rottier and Robert Wood from Adelphi Real World (Bollington, UK), Tamuno Alfred, Darren Kailung Jeng, Tendai Mugwagwa, Qiao Mu and Chern Chuan Soo from Pfizer Inc. (New York, United States) Agnieszka Gajewska, Tomasz Mikołajczyk and Ewa Śleszyńska-Dopiera from Quanticate (Warsaw, Poland), and Andy Surinach from Genesis Research (Hoboken, United States).

### Data Sharing Statement

Electronic health records are considered sensitive data in the UK by the Data Protection Act and cannot be shared. The primary care data can be requested via application to the Clinical Practice Research Datalink, with secondary care data and mortality data through linkage upon application. Information is available from <https://www.cprd.com/research-applications>.

### Transparency Statement

Dr Andersen affirms that this manuscript is an honest, accurate, and transparent account of the study being reported; that no important aspects of the study have been omitted; and that any discrepancies from the study as planned (and, if relevant, registered) have been explained.

This study reports pre-specified analyses according to a registered protocol with CPRD (CPRD study number 22\_002062) and Pfizer documented statistical analysis plan (study number KIMS 3106).



### **Role of the Funding Source**

This study was funded by Pfizer Inc (grant number N/A).

### **Contributorship**

Dr Andersen, Dr McGrath, Ms Reimbaeva, Dr Mendes, Dr Nguyen, Dr Tsang, Ms Malhotra and Dr Yang of Pfizer, as well as Dr Rai and Mr Tritton of Adelphi Real World which has received consulting fees from Pfizer, were involved in the study design (collection, analysis, and interpretation of the data), writing of the report, and in the decision to submit the article for publication. All authors had full access to all statistical reports and tables in the study and take responsibility for the integrity of the data and accuracy of the data analysis. All results presented in all tables were quality control verified by a non-Pfizer non-Adelphi employee.

### **Ethics Approval**

CPRD obtains ethical research approval annually from the UK's Health Research Authority Research Ethics Committee to accumulate and distribute patient data. This study is based in part on data from the Clinical Practice Research Datalink obtained under license from the UK Medicines and Healthcare products Regulatory Agency. The data is provided by patients and collected by the NHS as part of their care and support. Office for National Statistics (ONS) and Hospital Episode Statistics (HES) data, copyright © (2021), re-used with the permission of The Health & Social Care Information Center. All rights reserved. The interpretation and conclusions contained in this study are those of the authors alone.



**TABLE 1: Characteristics of COVID-19 Cases in CPRD Aurum, 1 August 2020 – 31 January 2022**

|                                      | Primary Care COVID-19<br>Cases<br>(n = 2,257,907) | Hospitalized COVID-19<br>Cases<br>(n = 13,165) |
|--------------------------------------|---------------------------------------------------|------------------------------------------------|
| Age at COVID-19 diagnosis,<br>years  |                                                   |                                                |
| 1-4                                  | 40,658 (2%)                                       | 15 (< 1%)                                      |
| 5-11                                 | 260,186 (11%)                                     | 21 (< 1%)                                      |
| 12-17                                | 263,800 (11%)                                     | 24 (< 1%)                                      |
| 18-49                                | 1,161,843 (52%)                                   | 3,127 (24%)                                    |
| 50-64                                | 379,528 (17%)                                     | 4,844 (37%)                                    |
| 65-74                                | 92,573 (4%)                                       | 2,386 (18%)                                    |
| 75-84                                | 40,481 (2%)                                       | 1,690 (13%)                                    |
| 85+                                  | 18,838 (1%)                                       | 1,058 (8%)                                     |
| Sex                                  |                                                   |                                                |
| Male                                 | 1,046,275 (46%)                                   | 7,537 (57%)                                    |
| Female                               | 1,211,592 (54%)                                   | 5,628 (43%)                                    |
| Unknown                              | 40 (< 1%)                                         | 0                                              |
| General Practitioner Practice Region |                                                   |                                                |
| North East                           | 83,834 (4%)                                       | 467 (4%)                                       |
| North West                           | 471,195 (21%)                                     | 2,886 (22%)                                    |
| Yorkshire and The Humber             | 71,429 (3%)                                       | 340 (3%)                                       |
| East Midlands                        | 49,651 (2%)                                       | 214 (2%)                                       |
| West Midlands                        | 377,125 (17%)                                     | 2,065 (16%)                                    |
| East of England                      | 95,139 (4%)                                       | 414 (3%)                                       |
| London                               | 424,908 (19%)                                     | 2,984 (23%)                                    |
| South East                           | 448,536 (20%)                                     | 2,682 (20%)                                    |
| South West                           | 235,785 (10%)                                     | 1,113 (8%)                                     |
| Unknown                              | 305 (< 1%)                                        | 0                                              |

**TABLE 2: Vaccination Status at COVID-19 Diagnosis in CPRD Aurum, 1 August 2020 – 31 January 2022**

|                             | Primary Care COVID-19<br>Cases<br>(n = 2,257,907) | Hospitalized COVID-19<br>Cases<br>(n = 13,165) |
|-----------------------------|---------------------------------------------------|------------------------------------------------|
| Non-immunocompromised       | 2,193,241 (100%)                                  | 12,984 (100%)                                  |
| Unvaccinated                | 1,170,509 (53%)                                   | 12,744 (98%)                                   |
| 1 COVID-19 vaccine dose     | 173,853 (8%)                                      | 240 (2%)                                       |
| 2 COVID-19 vaccine<br>doses | 598,367 (27%)                                     | 0                                              |
| First booster               | 250,512 (12%)                                     | 0                                              |
| Immunocompromised           | 64,666 (100%)                                     | 181 (100%)                                     |
| Unvaccinated                | 1,306 (2%)                                        | 102 (56%)                                      |
| 1 COVID-19 vaccine dose     | 6,033 (9%)                                        | 79 (44%)                                       |
| 2 COVID-19 vaccine<br>doses | 33,953 (53%)                                      | 0                                              |
| 3 COVID-19 vaccine<br>doses | 23,108 (36%)                                      | 0                                              |
| First booster               | 266 (< 1%)                                        | 0                                              |

**Table 3: Clinical Characteristics of Primary Care COVID-19 Cases in CPRD Aurum, by High-Risk Definitions**

|                                       | All<br>(n =<br>2,257,907) | Meeting NHS<br>Highest Risk<br>Conditions<br>(n = 249,972) | Meeting<br>PANORAMIC<br>Criteria<br>(n = 691,593) | Meeting<br>UKHSA<br>Clinical<br>Risk<br>(n =<br>225,051) |
|---------------------------------------|---------------------------|------------------------------------------------------------|---------------------------------------------------|----------------------------------------------------------|
| Primary care cases meeting definition | --                        | 11%                                                        | 31%                                               | 10%                                                      |
| Smoking status                        |                           |                                                            |                                                   |                                                          |
| Current smoker                        | 298,735 (13%)             | 44,365 (17%)                                               | 121,019 (18%)                                     | 46,436 (21%)                                             |
| Former smoker                         | 285,722 (13%)             | 67,637 (26%)                                               | 168,343 (24%)                                     | 63,124 (28%)                                             |
| Never smoked                          | 580,239 (26%)             | 87,217 (34%)                                               | 228,579 (33%)                                     | 77,157 (34%)                                             |
| Unknown                               | 1,093,211 (48%)           | 60,753 (23%)                                               | 173,652 (25%)                                     | 38,334 (17%)                                             |
| Body mass index (kg/m <sup>2</sup> )  |                           |                                                            |                                                   |                                                          |
| Mean (standard deviation)             | 27.6 (7.1)                | 29.1 (6.9)                                                 | 29.5 (6.7)                                        | 29.5 (7.5)                                               |
| Underweight (< 18.5)                  | 45,194 (2%)               | 3,720 (1%)                                                 | 5,305 (1%)                                        | 5,926 (3%)                                               |
| Not overweight (18.5-24.9)            | 226,272 (10%)             | 35,766 (14%)                                               | 81,363 (12%)                                      | 36,716 (16%)                                             |
| Overweight (25.0-29.9)                | 204,360 (9%)              | 45,261 (17%)                                               | 113,863 (16%)                                     | 43,758 (19%)                                             |
| Obese (≥30.0)                         | 219,253 (10%)             | 53,814 (21%)                                               | 138,035 (20%)                                     | 62,494 (28%)                                             |
| Unknown                               | 1,562,828 (69%)           | 121,411 (47%)                                              | 353,027 (51%)                                     | 76,157 (34%)                                             |
| Charlson Comorbidity Index            |                           |                                                            |                                                   |                                                          |
| Mean (standard deviation)             | 0.2 (0.6)                 | 0.7 (1.3)                                                  | 0.5 (1.0)                                         | 1.0 (1.3)                                                |
| 0                                     | 2,003,257 (89%)           | 165,823 (64%)                                              | 487,550 (71%)                                     | 102,790 (46%)                                            |
| 1 or 2                                | 221,370 (10%)             | 74,805 (29%)                                               | 174,287 (25%)                                     | 99,830 (44%)                                             |
| 3 or 4                                | 24,554 (1%)               | 12,659 (5%)                                                | 21,574 (3%)                                       | 15,961 (7%)                                              |
| 5+                                    | 8,726 (< 1%)              | 6,685 (3%)                                                 | 8,182 (1%)                                        | 6,470 (3%)                                               |

**Table 4: Clinical Characteristics of Hospitalized COVID-19 Cases in CPRD Aurum-HES Linked Data, by High-Risk Definitions**

|                                       | All<br>(n =<br>13,165) | Meeting NHS<br>Highest Risk<br>Conditions<br>(n = 4,333) | Meeting<br>PANORAMIC<br>Criteria<br>(n = 11,011) | Meeting<br>UKHSA<br>Clinical<br>Risk<br>(n =<br>5,353) |
|---------------------------------------|------------------------|----------------------------------------------------------|--------------------------------------------------|--------------------------------------------------------|
| Hospitalized cases meeting definition | --                     | 33%                                                      | 84%                                              | 41%                                                    |
| Smoking status                        |                        |                                                          |                                                  |                                                        |
| Current smoker                        | 1,690<br>(13%)         | 655 (15%)                                                | 1,476 (13%)                                      | 840 (16%)                                              |
| Former smoker                         | 3,810<br>(29%)         | 1,574 (36%)                                              | 3,544 (32%)                                      | 2,070<br>(39%)                                         |
| Never smoked                          | 4,205<br>(32%)         | 1,362 (31%)                                              | 3,513 (32%)                                      | 1,746<br>(33%)                                         |
| Unknown                               | 3,460<br>(26%)         | 742 (17%)                                                | 2,478 (23%)                                      | 697 (13%)                                              |
| Body mass index (kg/m <sup>2</sup> )  |                        |                                                          |                                                  |                                                        |
| Mean (standard deviation)             | 31.9 (7.5)             | 31.4 (7.5)                                               | 31.7 (7.4)                                       | 31.4 (7.7)                                             |
| Underweight (< 18.5)                  | 96 (1%)                | 51 (1%)                                                  | 90 (1%)                                          | 70 (1%)                                                |
| Not overweight (18.5-24.9)            | 1,162 (9%)             | 509 (12%)                                                | 1,060 (10%)                                      | 729 (14%)                                              |
| Overweight (25.0-29.9)                | 2,390<br>(18%)         | 949 (22%)                                                | 2,161 (20%)                                      | 1,239<br>(23%)                                         |
| Obese (≥30.0)                         | 4,586<br>(35%)         | 1,662 (38%)                                              | 4,053 (37%)                                      | 2,231<br>(42%)                                         |
| Unknown                               | 4,931<br>(37%)         | 1,162 (27%)                                              | 3,647 (33%)                                      | 1,084<br>(20%)                                         |
| Charlson Comorbidity Index            |                        |                                                          |                                                  |                                                        |
| Mean (standard deviation)             | 1.0 (1.6)              | 1.9 (2.1)                                                | 1.2 (1.7)                                        | 2.0 (2.0)                                              |
| 0                                     | 7,128<br>(54%)         | 1,283 (30%)                                              | 5,158 (47%)                                      | 894 (17%)                                              |
| 1 or 2                                | 4,241<br>(32%)         | 1,833 (43%)                                              | 4,094 (37%)                                      | 2,927<br>(55%)                                         |
| 3 or 4                                | 1,161 (9%)             | 711 (16%)                                                | 1,129 (10%)                                      | 963 (18%)                                              |
| 5+                                    | 635 (5%)               | 506 (12%)                                                | 630 (6%)                                         | 569 (11%)                                              |

**Figure 1. Cohort Description**

Caption: Attrition Diagram of Final Cohort Derivation

For peer review only

## REFERENCES

- 1 UK Government. England Summary | Coronavirus (COVID-19) in the UK. <https://coronavirus.data.gov.uk> (accessed 11 January 2023)
- 2 CDC. Risk for COVID-19 Infection, Hospitalization, and Death By Age Group. *Cent. Dis. Control Prev.* 2020. <https://www.cdc.gov/coronavirus/2019-ncov/covid-data/investigations-discovery/hospitalization-death-by-age.html> (accessed 11 January 2023)
- 3 NHS. Who is at high risk from coronavirus (COVID-19). *nhs.uk.* 2021. <https://www.nhs.uk/conditions/coronavirus-covid-19/people-at-higher-risk/who-is-at-high-risk-from-coronavirus/> (accessed 11 January 2023)
- 4 Herrett E, Gallagher AM, Bhaskaran K, *et al.* Data Resource Profile: Clinical Practice Research Datalink (CPRD). *Int J Epidemiol.* 2015;44:827–36.
- 5 Coronavirus test results now visible to GPs. NDRS. <https://digital.nhs.uk/news/2020/coronavirus-test-results-now-visible-to-gps> (accessed 15 February 2023)
- 6 COVID-19 vaccination record queries. NHS Digit. <https://digital.nhs.uk/coronavirus/vaccinations/data-flows-and-resolving-data-queries/covid-19-vaccination-record-queries> (accessed 15 February 2023)
- 7 Wolf A, Dedman D, Campbell J, *et al.* Data resource profile: Clinical Practice Research Datalink (CPRD) Aurum. *Int J Epidemiol.* 2019;48:1740–1740g.
- 8 Data highlights | CPRD. <https://www.cprd.com/data-highlights> (accessed 11 January 2023)
- 9 Population and household estimates, England and Wales: Census 2021 - Office for National Statistics. <https://www.ons.gov.uk/peoplepopulationandcommunity/populationandmigration/populationestimates/datasets/populationandhouseholdestimatesenglandandwalescensus2021> (accessed 31 January 2023)
- 10 CPRD. Feasibility counts for SARS-CoV-2-related codes in CPRD primary care data (May 2022). <https://cprd.com/sites/default/files/2022-05/SARS-CoV-2%20counts%20May2022.pdf>
- 11 The rollout of the COVID-19 vaccination programme in England - National Audit Office (NAO) report. *Natl. Audit Off. NAO.* 2022. <https://www.nao.org.uk/reports/the-roll-out-of-the-covid-19-vaccine-in-england/> (accessed 16 February 2023)
- 12 Coronavirus » JCVI announcement regarding AstraZeneca vaccine and next steps. <https://www.england.nhs.uk/coronavirus/documents/jcvi-announcement-regarding-astrazeneca-vaccine-and-next-steps/> (accessed 16 February 2023)

- 13 Coronavirus (COVID-19) vaccine. nhs.uk. 2022. <https://www.nhs.uk/conditions/coronavirus-covid-19/coronavirus-vaccination/coronavirus-vaccine/> (accessed 16 February 2023)
- 14 Defining the highest-risk clinical subgroups upon community infection with SARS-CoV-2 when considering the use of neutralising monoclonal antibodies (nMABs) and antiviral drugs: independent advisory group report. GOV.UK. <https://www.gov.uk/government/publications/higher-risk-patients-eligible-for-covid-19-treatments-independent-advisory-group-report/defining-the-highest-risk-clinical-subgroups-upon-community-infection-with-sars-cov-2-when-considering-the-use-of-neutralising-monoclonal-antibodies> (accessed 16 February 2023)
- 15 PANORAMIC Active GP Sites. Google My Maps. <https://www.google.com/maps/d/viewer?mid=1fV1C91Aj4XtRUg1jwPL0oMIDUM8br6mJ> (accessed 16 February 2023)
- 16 COVID-19: the green book, chapter 14a. GOV.UK. 2022. <https://www.gov.uk/government/publications/covid-19-the-green-book-chapter-14a> (accessed 16 February 2023)
- 17 Davidson J, Warren-Gash C. Clinical codelist - CPRD Aurum - chronic neurological disease. 2022. <https://datacompass.lshtm.ac.uk/id/eprint/2817/>
- 18 Davidson J, Warren-Gash C, McDonald H. Clinical codelist - CPRD Aurum - chronic respiratory disease. 2021. <https://datacompass.lshtm.ac.uk/id/eprint/2214/>
- 19 Davidson J, Warren-Gash C, McDonald H, *et al.* Clinical codelist - chronic kidney disease. 2021. <https://datacompass.lshtm.ac.uk/id/eprint/2406/>
- 20 Davidson J, Warren-Gash C, McDonald H. Clinical codelist - CPRD Aurum - Immunosuppressive conditions. 2021. <https://datacompass.lshtm.ac.uk/id/eprint/2234/>
- 21 Dedman D, Carreira H, Strongman H. Clinical codelist - Cancer. 2021. <https://datacompass.lshtm.ac.uk/id/eprint/2408/>
- 22 Muzambi R. Clinical codelist - Chronic Liver Disease ICD-10 codes. 2020. <https://datacompass.lshtm.ac.uk/id/eprint/2032/>
- 23 Harriet Forbes, London School of Hygiene & Tropical Medicine, London, United Kingdom. Clinical Code List - Moderate Immunosuppression OPCS Codes. <https://doi.org/10.17037/DATA.00001587>.
- 24 Cases in England | Coronavirus in the UK. 2023. <https://coronavirus.data.gov.uk/details/cases?areaType=nation&areaName=England> (accessed 31 January 2023)

- 1  
2  
3 25 Healthcare in England | Coronavirus in the UK. 2023.  
4 <https://coronavirus.data.gov.uk/details/healthcare?areaType=nation&areaName=England>  
5 (accessed 31 January 2023)  
6  
7  
8 26 Household total wealth in Great Britain - Office for National Statistics.  
9 [https://www.ons.gov.uk/peoplepopulationandcommunity/personalandhouseholdfinances/i](https://www.ons.gov.uk/peoplepopulationandcommunity/personalandhouseholdfinances/incomeandwealth/bulletins/totalwealthingreatbritain/april2018tomarch2020)  
10 [ncomeandwealth/bulletins/totalwealthingreatbritain/april2018tomarch2020](https://www.ons.gov.uk/peoplepopulationandcommunity/personalandhouseholdfinances/incomeandwealth/bulletins/totalwealthingreatbritain/april2018tomarch2020) (accessed 31  
11 January 2023)  
12  
13  
14 27 Public Health England. Disparities in the risk and outcomes of COVID-19.  
15  
16 28 Office for National Statistics. Coronavirus (COVID-19) case rates by socio-demographic  
17 characteristics, England: 1 September 2020 to 10 December 2021. Published Online First: 14  
18 February 2022.  
19  
20 29 Thygesen JH, Tomlinson C, Hollings S, *et al.* COVID-19 trajectories among 57 million adults in  
21 England: a cohort study using electronic health records. *Lancet Digit Health.* 2022;4:e542–  
22 57.  
23  
24  
25 30 Center for Medicare & Medicaid Services. Assessing the Completeness of Medicare Claims  
26 Data for Measuring COVID-19 Vaccine Administration.  
27  
28 31 Wiemken TL, McGrath LJ, Andersen KM, *et al.* Coronavirus Disease 2019 Severity and Risk of  
29 Subsequent Cardiovascular Events. *Clin Infect Dis.* 2022;ciac661.  
30  
31  
32 32 Polack FP, Thomas SJ, Kitchin N, *et al.* Safety and Efficacy of the BNT162b2 mRNA Covid-19  
33 Vaccine. *N Engl J Med.* 2020;383:2603–15.  
34  
35 33 Baden LR, El Sahly HM, Essink B, *et al.* Efficacy and Safety of the mRNA-1273 SARS-CoV-2  
36 Vaccine. *N Engl J Med.* 2021;384:403–16.  
37  
38  
39 34 Voysey M, Clemens SAC, Madhi SA, *et al.* Safety and efficacy of the ChAdOx1 nCoV-19  
40 vaccine (AZD1222) against SARS-CoV-2: an interim analysis of four randomised controlled  
41 trials in Brazil, South Africa, and the UK. *The Lancet.* 2021;397:99–111.  
42  
43  
44  
45  
46  
47  
48  
49  
50  
51  
52  
53  
54  
55  
56  
57  
58  
59  
60



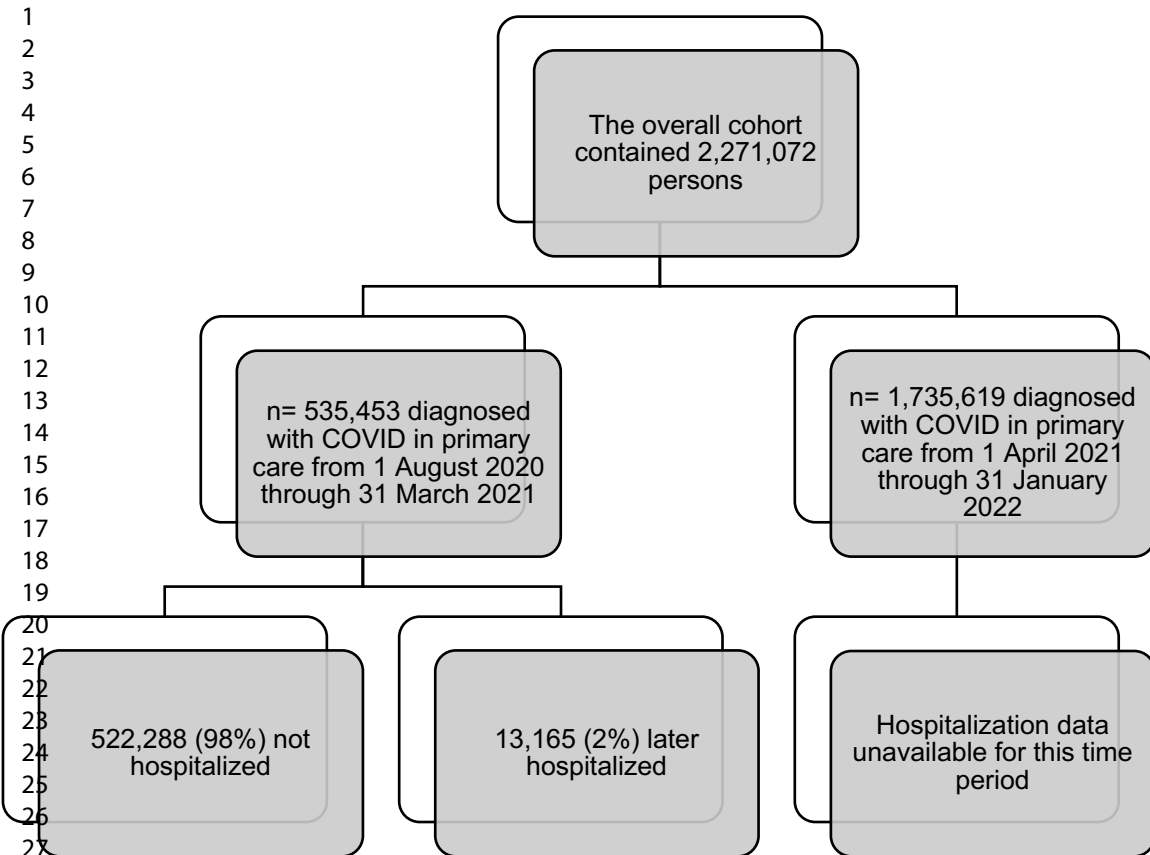

ANDERSEN ET AL (2023)

PERSONS DIAGNOSED WITH COVID IN ENGLAND IN THE CPRD: A COHORT DESCRIPTION

**Table of Contents**

|                                                                                                                                                                                              |           |
|----------------------------------------------------------------------------------------------------------------------------------------------------------------------------------------------|-----------|
| <b>Supplemental file 1, Table 1: COVID Cohort Definition .....</b>                                                                                                                           | <b>2</b>  |
| <b>Supplemental file 1, Table 2: COVID Vaccination Definition .....</b>                                                                                                                      | <b>4</b>  |
| <b>Supplemental file 1, Table 3: Search Terms for NHS Highest Risk Definition.....</b>                                                                                                       | <b>6</b>  |
| <b>Supplemental file 1, Table 4: Search Terms for PANORAMIC Eligibility Criteria Definition .....</b>                                                                                        | <b>13</b> |
| <b>Supplemental file 1, Table 5: Search Terms for UK Health Security Agency Clinical Risk Group Definition .....</b>                                                                         | <b>19</b> |
| <b>Supplemental file 1, Table 6: Cohort Attrition .....</b>                                                                                                                                  | <b>27</b> |
| <b>Supplemental file 1, Figure 1: Date of Diagnosis for 2,271,072 COVID Cases in CPRD Aurum, By Care Setting, August 1, 2020 through January 31, 2022 .....</b>                              | <b>28</b> |
| <b>Supplemental file 1, Figure 2: Date of Diagnosis for 2,257,907 Primary Care COVID Cases in CPRD Aurum, August 1, 2020 through January 31, 2022 .....</b>                                  | <b>29</b> |
| <b>Supplemental file 1, Figure 3: Date of Primary Care Recorded Diagnosis in CPRD Aurum-HES Linked Data for 13,165 Hospitalised COVID Cases, August 1, 2020 through March 31, 2021 .....</b> | <b>30</b> |
| <b>Supplemental file 1, Table 7: Reference National Case Counts and Census Distributions for England.....</b>                                                                                | <b>31</b> |
| <b>Supplemental file 1, Table 8: Regional Distribution of CPRD COVID cohorts, CPRD Practices, COVID Cases and Population of England .....</b>                                                | <b>33</b> |
| <b>Supplemental file 1, Table 9: Characteristics of Primary Care COVID Cases in CPRD Aurum, by High Risk Definitions .....</b>                                                               | <b>34</b> |
| <b>Supplemental file 1, Table 10: Characteristics of Hospitalized COVID Cases in CPRD Aurum-HES Linked Data, by High Risk Definitions .....</b>                                              | <b>35</b> |

ANDERSEN ET AL (2023)

PERSONS DIAGNOSED WITH COVID IN ENGLAND IN THE CPRD: A COHORT DESCRIPTION

**Supplemental file 1, Table 1: COVID Cohort Definition**

| Medcode           | Term                                                                                                                                |
|-------------------|-------------------------------------------------------------------------------------------------------------------------------------|
| 6874141000006113  | SARS-CoV                                                                                                                            |
| 6604671000006111  | SARS-CoV infection                                                                                                                  |
| 13053051000006117 | 2019-nCoV (novel coronavirus) antigen detection result positive                                                                     |
| 12990741000006116 | 2019-nCoV (novel coronavirus) detected                                                                                              |
| 13483601000006110 | 2019-nCoV (novel coronavirus) detection result positive at the limit of detection                                                   |
| 13483161000006118 | 2019-nCoV (novel coronavirus) ribonucleic acid detected                                                                             |
| 14168601000006119 | Acute COVID-19                                                                                                                      |
| 13486461000006118 | Acute COVID-19 infection                                                                                                            |
| 14168611000006116 | Acute disease caused by Severe acute respiratory syndrome coronavirus 2                                                             |
| 13486471000006113 | Acute disease caused by severe acute respiratory syndrome coronavirus 2 infection                                                   |
| 13486571000006112 | Asymptomatic COVID-19                                                                                                               |
| 13486561000006117 | Asymptomatic SARS-CoV-2 (severe acute respiratory syndrome coronavirus 2) infection                                                 |
| 12802201000006117 | Confirmed 2019-nCoV (novel coronavirus) infection                                                                                   |
| 13012431000006117 | COVID-19                                                                                                                            |
| 13483031000006114 | COVID-19                                                                                                                            |
| 13012441000006110 | COVID-19 caused by SARS-CoV-2 (severe acute respiratory syndrome coronavirus 2)                                                     |
| 13002281000006117 | COVID-19 confirmed by laboratory test                                                                                               |
| 13002311000006115 | COVID-19 confirmed clinically                                                                                                       |
| 13002291000006119 | COVID-19 confirmed using clinical diagnostic criteria                                                                               |
| 13483951000006118 | COVID-19 detected                                                                                                                   |
| 12990531000006116 | Detection of 2019-nCoV (novel coronavirus) using polymerase chain reaction technique                                                |
| 13485771000006110 | Detection of COVID-19                                                                                                               |
| 13485471000006115 | Detection of ribonucleic acid of 2019 novel coronavirus in nasopharyngeal swab                                                      |
| 13485711000006118 | Detection of ribonucleic acid of COVID- 19 using polymerase chain reaction                                                          |
| 13485421000006116 | Detection of ribonucleic acid of Severe acute respiratory syndrome coronavirus 2                                                    |
| 13485461000006110 | Detection of RNA (ribonucleic acid) of SARS-CoV-2 (severe acute respiratory syndrome coronavirus 2) in nasopharyngeal swab          |
| 13485521000006117 | Detection of RNA (ribonucleic acid) of SARS-CoV-2 (severe acute respiratory syndrome coronavirus 2) in oropharyngeal swab           |
| 13485581000006118 | Detection of RNA (ribonucleic acid) of SARS-CoV-2 (severe acute respiratory syndrome coronavirus 2) in sputum                       |
| 13485701000006116 | Detection of RNA (ribonucleic acid) of SARS-CoV-2 (severe acute respiratory syndrome coronavirus 2) using polymerase chain reaction |
| 13485751000006117 | Detection of SARS-CoV-2 (severe acute respiratory syndrome coronavirus 2)                                                           |
| 13485381000006114 | Detection of SARS-CoV-2 (severe acute respiratory syndrome coronavirus 2) antigen                                                   |
| 13012231000006116 | Detection of SARS-CoV-2 (severe acute respiratory syndrome coronavirus 2) using polymerase chain reaction technique                 |

ANDERSEN ET AL (2023)

## PERSONS DIAGNOSED WITH COVID IN ENGLAND IN THE CPRD: A COHORT DESCRIPTION

---

|                   |                                                                                                                                         |
|-------------------|-----------------------------------------------------------------------------------------------------------------------------------------|
| 13483041000006116 | Disease caused by 2019 novel coronavirus                                                                                                |
| 13483051000006119 | Disease caused by 2019-nCoV                                                                                                             |
| 12991131000006119 | Disease caused by 2019-nCoV (novel coronavirus)                                                                                         |
| 13483061000006117 | Disease caused by Severe acute respiratory syndrome coronavirus 2                                                                       |
| 12991141000006112 | Disease caused by Wuhan 2019-nCoV (novel coronavirus)                                                                                   |
| 13053041000006119 | SARS-CoV-2 (severe acute respiratory syndrome coronavirus 2) antigen detection result positive                                          |
| 13012301000006116 | SARS-CoV-2 (severe acute respiratory syndrome coronavirus 2) detected                                                                   |
| 13052351000006112 | SARS-CoV-2 (severe acute respiratory syndrome coronavirus 2) RNA (ribonucleic acid) detection result positive                           |
| 13483141000006117 | SARS-CoV-2 (severe acute respiratory syndrome coronavirus 2) RNA (ribonucleic acid) detection result positive                           |
| 13483591000006119 | SARS-CoV-2 (severe acute respiratory syndrome coronavirus 2) RNA (ribonucleic acid) detection result positive at the limit of detection |
| 13483151000006115 | Severe acute respiratory syndrome coronavirus 2 ribonucleic acid detected                                                               |
| 12990751000006119 | Wuhan 2019-nCoV (novel coronavirus) detected                                                                                            |
| 13002301000006118 | Probable COVID-19 confirmed using clinical diagnostic criteria                                                                          |
| 13483611000006113 | SARS (severe acute respiratory syndrome) coronavirus 2 RNA                                                                              |
| 13484481000006118 | SARS-CoV-2 - severe acute respiratory syndrome coronavirus 2                                                                            |
| 13039281000006117 | SARS-CoV-2 (severe acute respiratory syndrome coronavirus 2) detection result positive                                                  |
| 13052381000006116 | SARS-CoV-2 (severe acute respiratory syndrome coronavirus 2) RNA (ribonucleic acid) qualitative existence in specimen                   |
| 13483941000006115 | Severe acute respiratory syndrome coronavirus 2 detected                                                                                |

---

Note: "SARS-CoV" or "SARS-CoV infection" may refer to the SARS illness of 2003. We allowed these terms, given the novelty of SARS-CoV-2 and potential for erroneous use of SARS-CoV terms, but required them to be used during the time period of COVID (August 2020 onwards).

ANDERSEN ET AL (2023)

PERSONS DIAGNOSED WITH COVID IN ENGLAND IN THE CPRD: A COHORT DESCRIPTION

**Supplemental file 1, Table 2: COVID Vaccination Definition**

| <b>Product code</b> | <b>Term</b>                                                                                                                                                  |
|---------------------|--------------------------------------------------------------------------------------------------------------------------------------------------------------|
| 13739441000033113   | COVID-19 Vaccine AstraZeneca (ChAdOx1 S [recombinant]) 5x10,000,000 viral particles/0.5ml dose suspension for injection multidose vials (AstraZeneca UK Ltd) |
| 13750541000033115   | COVID-19 Vaccine Janssen (Ad26.COVS-S [recombinant]) 0.5ml dose suspension for injection multidose vials (Janssen-Cilag Ltd)                                 |
| 13860541000033111   | COVID-19 Vaccine Medicago (CoVLP) 3.75micrograms/0.5ml dose emulsion for injection multidose vials (Medicago Inc)                                            |
| 13790341000033117   | COVID-19 Vaccine Novavax (adjuvanted) 5micrograms/0.5ml dose suspension for injection multidose vials (Baxter Oncology GmbH)                                 |
| 13778941000033110   | COVID-19 Vaccine Valneva (inactivated adjuvanted whole virus) 40antigen units/0.5ml dose suspension for injection multidose vials (Valneva UK Ltd)           |
| 13739541000033114   | Comirnaty COVID-19 mRNA Vaccine 30micrograms/0.3ml dose concentrate for dispersion for injection multidose vials (Pfizer Ltd)                                |
| 13764941000033111   | Spikevax COVID-19 mRNA (nucleoside modified) Vaccine 0.1mg/0.5ml dose dispersion for injection multidose vials (Moderna, Inc)                                |
| <b>Medical code</b> | <b>Term</b>                                                                                                                                                  |
| 12990501000006112   | 2019-nCoV (novel coronavirus) vaccination                                                                                                                    |
| 13012221000006119   | SARS-CoV-2 (severe acute respiratory syndrome coronavirus 2) vaccination                                                                                     |
| 13482981000006117   | SARS-CoV-2 (severe acute respiratory syndrome coronavirus 2) vaccination                                                                                     |
| 13482991000006119   | 2019 novel coronavirus vaccination                                                                                                                           |
| 13483001000006118   | Severe acute respiratory syndrome coronavirus 2 vaccination                                                                                                  |
| 13483011000006115   | COVID-19 vaccination                                                                                                                                         |
| 13483021000006111   | 2019-nCoV (novel coronavirus) vaccination                                                                                                                    |
| 13483211000006110   | Immunisation course to achieve immunity against SARS-CoV-2 (severe acute respiratory syndrome coronavirus 2)                                                 |
| 13483221000006119   | Immunisation course to achieve immunity against 2019-nCoV (novel coronavirus)                                                                                |
| 13483231000006116   | Administration of first dose of SARS- CoV-2 (severe acute respiratory syndrome coronavirus 2) vaccine                                                        |
| 13483241000006114   | Administration of first dose of 2019- nCoV (novel coronavirus) vaccine                                                                                       |
| 13483251000006111   | Administration of second dose of SARS- CoV-2 (severe acute respiratory syndrome coronavirus 2) vaccine                                                       |
| 13483261000006113   | Administration of second dose of 2019- nCoV (novel coronavirus) vaccine                                                                                      |
| 13483531000006118   | SARS-CoV-2 (severe acute respiratory syndrome coronavirus 2) immunisation course started                                                                     |
| 13483541000006111   | 2019-nCoV (novel coronavirus) immunisation course started                                                                                                    |
| 14169101000006118   | COVID-19 mRNA vaccine                                                                                                                                        |
| 14170191000006111   | SARS-CoV-2 antigen vaccine or SARS- CoV-2 mRNA vaccine                                                                                                       |
| 14170301000006118   | Administration of first dose of SARS- CoV-2 mRNA vaccine                                                                                                     |
| 14170341000006116   | First COVID-19 mRNA vaccination                                                                                                                              |
| 14170411000006113   | Administration of second dose of SARS- CoV-2 mRNA vaccine                                                                                                    |
| 14170431000006119   | Second COVID-19 mRNA vaccination                                                                                                                             |

ANDERSEN ET AL (2023)

## PERSONS DIAGNOSED WITH COVID IN ENGLAND IN THE CPRD: A COHORT DESCRIPTION

---

|                   |                                                                                                                |
|-------------------|----------------------------------------------------------------------------------------------------------------|
| 14233631000006113 | Immunisation course to maintain protection against SARS-CoV-2 (severe acute respiratory syndrome coronavirus 2 |
| 14233641000006115 | Booster course to maintain protection against SARS-CoV-2 (severe acute respiratory syndrome coronavirus 2)     |
| 14233671000006111 | SARS-CoV-2 (severe acute respiratory syndrome coronavirus 2) immunisation course completed                     |
| 14233841000006119 | SARS-CoV-2 (severe acute respiratory syndrome coronavirus 2) protection maintenance course started             |
| 14233871000006110 | SARS-CoV-2 (severe acute respiratory syndrome coronavirus 2) protection maintenance course completed           |
| 14233881000006113 | Severe acute respiratory syndrome coronavirus 2 protection maintenance course done                             |
| 14283421000006117 | Administration of fourth dose of SARS- CoV-2 (severe acute respiratory syndrome coronavirus 2) vaccine         |
| 14283481000006118 | Administration of fifth dose of SARS- CoV-2 (severe acute respiratory syndrome coronavirus 2) vaccine          |
| 14283541000006113 | Administration of third dose of SARS- CoV-2 (severe acute respiratory syndrome coronavirus 2) vaccine          |

---

ANDERSEN ET AL (2023)

PERSONS DIAGNOSED WITH COVID IN ENGLAND IN THE CPRD: A COHORT DESCRIPTION

**Supplemental file 1, Table 3: Search Terms for NHS Highest Risk Definition**

Note: this list reflects the report “Defining the highest-risk clinical subgroups upon community infection with SARS-CoV-2 when considering the use of neutralising monoclonal antibodies (nMABs) and antiviral drugs: independent advisory group report” version published on May 30, 2022.

| Classification as defined by England’s Deputy Chief Medical Officer | Concept as operationalized by Andersen et al                                                                                                                                                                                                                   | Search term                                                                                                                                                                                                                                                                                                                                                                                           |
|---------------------------------------------------------------------|----------------------------------------------------------------------------------------------------------------------------------------------------------------------------------------------------------------------------------------------------------------|-------------------------------------------------------------------------------------------------------------------------------------------------------------------------------------------------------------------------------------------------------------------------------------------------------------------------------------------------------------------------------------------------------|
| Down’s syndrome and other genetic disorders                         | Down’s syndrome or other chromosomal disorder known to affect immune competence                                                                                                                                                                                | *down*<br>*trisom*<br>*mongol*                                                                                                                                                                                                                                                                                                                                                                        |
| Solid cancer                                                        | We identified a code list “Clinical codelist – Cancer”, which did not separate solid from liquid (blood) cancers. We systematically excluded blood cancers from the list by excluding the following terms, and had the resulting list reviewed by a clinician: | leuk<br>Lymphoma<br>lymphatic<br>Lymphoid<br>lymphosarc<br>myeloma<br>myeloid<br>myeloscler<br>myelofib<br>myelosis<br>myeloprol<br>myelody<br>walden<br>anem<br>anaem<br>raeb<br>nodular scler<br>mycosis<br>sezary<br>zary<br>hodgk<br>heavy<br>plasma<br>marrow<br>haemato<br>hemota<br>erythraem<br>erythrem<br>heilmeyer<br>lymphadenopathy<br>polycyt<br>erythrocyt<br>erythrodys<br>thrombocyt |

ANDERSEN ET AL (2023)

## PERSONS DIAGNOSED WITH COVID IN ENGLAND IN THE CPRD: A COHORT DESCRIPTION

|                                                                                |                                                       |                       |
|--------------------------------------------------------------------------------|-------------------------------------------------------|-----------------------|
|                                                                                |                                                       | franklin              |
|                                                                                |                                                       | immunoprolif          |
|                                                                                |                                                       | reticulosarc          |
|                                                                                |                                                       | chloroma              |
|                                                                                |                                                       | macroglob             |
|                                                                                |                                                       | reticulosis           |
|                                                                                |                                                       | kahler                |
|                                                                                |                                                       | burkitt               |
|                                                                                |                                                       | di guglielmo          |
|                                                                                |                                                       | langer                |
|                                                                                |                                                       | histiocytosis         |
|                                                                                |                                                       | germinoblast          |
|                                                                                |                                                       | letterer              |
|                                                                                |                                                       | FAB                   |
|                                                                                |                                                       | Mastocytosis          |
| Haematological diseases and recipients of haematological stem cell transplants | Amyloidosis                                           | *amyloid*             |
|                                                                                | Graft Versus Host disease                             | *GVHD*                |
|                                                                                |                                                       | *Graft V*             |
|                                                                                |                                                       | *Graft-V*             |
|                                                                                |                                                       | *reject*              |
|                                                                                |                                                       | *trans*               |
|                                                                                |                                                       | *fail* *trans*        |
|                                                                                | Myelodysplastic syndrome                              | *MDS*                 |
|                                                                                |                                                       | *myelod*              |
|                                                                                |                                                       | *preleuk*             |
|                                                                                |                                                       | *smouldering leuk*    |
|                                                                                | Chronic myelomonocytic leukaemia                      | *CMML*                |
|                                                                                |                                                       | *chronic myelom*      |
|                                                                                | Sickle cell disease                                   | *sickl*               |
|                                                                                |                                                       | *SCD*                 |
|                                                                                | Myeloma                                               | *myelom*              |
|                                                                                |                                                       | *kahler*              |
|                                                                                | Myelofibrosis                                         | *myelof*              |
|                                                                                |                                                       | *PMF*                 |
|                                                                                |                                                       | *idiopath* *fibrosis* |
|                                                                                |                                                       | *myelod metaplasia*   |
|                                                                                | Rare inherited anemia                                 | *anaem*               |
|                                                                                |                                                       | *anem*                |
|                                                                                | Chronic lymphocytic leukaemia and Follicular lymphoma | *lymphoma*            |
|                                                                                |                                                       | *NHL*                 |
|                                                                                |                                                       | * hodgk*              |
|                                                                                |                                                       | *nodular scler*       |
|                                                                                |                                                       | *mycosis fung*        |
|                                                                                |                                                       | *sezary*              |
|                                                                                |                                                       | *walden*              |
|                                                                                | Thalassaemia                                          | *thalass*             |
|                                                                                |                                                       | *cooley*              |
|                                                                                |                                                       | *mediterr*            |
|                                                                                |                                                       | *constant spring*     |
|                                                                                |                                                       | *haemoglobin h*       |



ANDERSEN ET AL (2023)

## PERSONS DIAGNOSED WITH COVID IN ENGLAND IN THE CPRD: A COHORT DESCRIPTION

|               |                                                                                               |                         |
|---------------|-----------------------------------------------------------------------------------------------|-------------------------|
|               |                                                                                               | *hemoglobin h*          |
|               |                                                                                               | *hb h*                  |
|               |                                                                                               | *haemoglobin bart*      |
|               |                                                                                               | *hemoglobin bart*       |
|               |                                                                                               | *hb bart*               |
|               | Systemic anti-cancer treatments:                                                              |                         |
|               | Davidson, J, Warren-Gash, C and Mcdonald, H (2021). Clinical codelist - CPRD                  |                         |
|               | Aurum - Immunosuppressive conditions. [Data Collection]. London School of                     |                         |
|               | Hygiene & Tropical Medicine, London, United Kingdom.                                          |                         |
|               | <a href="https://doi.org/10.17037/DATA.00002234">https://doi.org/10.17037/DATA.00002234</a> . |                         |
| Renal disease | Davidson, J, Warren-Gash, C, Mcdonald, H, Evans, D and Clay, S (2021). Clinical               |                         |
|               | codelist - chronic kidney disease. [Data Collection]. London School of Hygiene &              |                         |
|               | Tropical Medicine, London, United Kingdom.                                                    |                         |
|               | <a href="https://doi.org/10.17037/DATA.00002406">https://doi.org/10.17037/DATA.00002406</a> . |                         |
|               | CKD, stage 4 or 5                                                                             | *CKD*                   |
|               |                                                                                               | *renal* *disease*       |
|               |                                                                                               | *renal* *failure*       |
|               |                                                                                               | *renal* *insufficiency* |
|               |                                                                                               | *renal* *disorder*      |
|               |                                                                                               | *kidney* *disease*      |
|               |                                                                                               | *kidney* *disorder*     |
|               |                                                                                               | *kidney* *failure*      |
|               |                                                                                               | *eGFR*                  |
|               |                                                                                               | *estimated*             |
|               |                                                                                               | *glomerular*            |
|               |                                                                                               | *filtration* *rate*     |
|               |                                                                                               | *disease* *renal*       |
|               |                                                                                               | *failure* *renal*       |
|               |                                                                                               | *insufficiency* *renal* |
|               |                                                                                               | *disorder* *renal*      |
|               |                                                                                               | *disease* *kidney*      |
|               |                                                                                               | *disorder* *kidney*     |
|               |                                                                                               | *failure* *kidney*      |
| Liver disease | Cirrhosis                                                                                     | *cirrhos*               |
| Solid organ   | Solid organ transplant                                                                        | *transplant*            |
| transplant    |                                                                                               | *organ* *recipient*     |
| recipients    |                                                                                               | *heart* *recipient*     |
|               |                                                                                               | *lung* *recipient*      |
|               |                                                                                               | *pancreas*              |
|               |                                                                                               | *recipient*             |
|               |                                                                                               | *kidney* *recipient*    |
|               |                                                                                               | *intestine* *recipient* |
|               |                                                                                               | *gland* *recipient*     |
|               |                                                                                               | *stomach* *recipient*   |
|               |                                                                                               | *spleen* *recipient*    |
|               |                                                                                               | *liver* *recipient*     |
|               |                                                                                               | *bladder* *recipient*   |
| Immune-       | People who have received a B-cell depleting therapy in the                                    | Obinutuzumab            |
| mediated      | last 12 months                                                                                | Ocrelizumab             |

ANDERSEN ET AL (2023)  
 PERSONS DIAGNOSED WITH COVID IN ENGLAND IN THE CPRD: A COHORT DESCRIPTION

|                                  |                                                                                                                                                                               |                                                                                                                                                                                                                                          |
|----------------------------------|-------------------------------------------------------------------------------------------------------------------------------------------------------------------------------|------------------------------------------------------------------------------------------------------------------------------------------------------------------------------------------------------------------------------------------|
| inflammatory disorders           | People who have been treated with cyclophosphamide (IV or oral) in the 6 months prior                                                                                         | Ofatumumab<br>Rituximab<br>Cyclophosphamide                                                                                                                                                                                              |
|                                  | People who are on biologics or small molecule JAK-inhibitors (except anti-CD20 depleting monoclonal antibodies) or who have received these therapies within the last 6 months | Abatacept<br>Adalimumab<br>Baracitinib<br>Belimumab<br>Certolizumab pegol<br>Etanercept<br>Golimumab<br>Infliximab<br>Ixekizumab<br>Sarilumab<br>Secukinumab<br>Tocilizumab<br>Tofacitinib<br>Upadacitinib<br>Ustekinumab<br>Vedolizumab |
|                                  | People who are on corticosteroids (equivalent to greater than 10mg per day of prednisolone) for at least the 28 days prior                                                    | Betamethasone<br>Cortisone<br>Dexamethasone<br>Hydrocortisone<br>Methylprednisolone<br>Prednisolone<br>Prednisone<br>Triamcinolone                                                                                                       |
|                                  | People who are on current treatment with: methotrexate (for interstitial lung disease) and/or ciclosporin                                                                     | Mycophenolate<br>Tacrolimus, oral<br>Azathioprine with mercaptopurine<br>Methotrexate<br>Ciclosporin                                                                                                                                     |
| Giant cell arteritis             |                                                                                                                                                                               | *giant cell arterit*                                                                                                                                                                                                                     |
| Sarcoidosis                      |                                                                                                                                                                               | *sarcoid*                                                                                                                                                                                                                                |
|                                  |                                                                                                                                                                               | *Besnier*                                                                                                                                                                                                                                |
| Psoriatic arthritis or psoriasis |                                                                                                                                                                               | *arthr*                                                                                                                                                                                                                                  |
|                                  |                                                                                                                                                                               | *psoria*                                                                                                                                                                                                                                 |
| Autoimmune hepatitis             |                                                                                                                                                                               | *autoimmune hep*                                                                                                                                                                                                                         |
|                                  |                                                                                                                                                                               | *hepatitis auto*                                                                                                                                                                                                                         |
|                                  |                                                                                                                                                                               | *AIH*                                                                                                                                                                                                                                    |
|                                  |                                                                                                                                                                               | *lupoid hep*                                                                                                                                                                                                                             |
|                                  |                                                                                                                                                                               | *autoimmune chron*                                                                                                                                                                                                                       |
|                                  |                                                                                                                                                                               | *autoimmune act*                                                                                                                                                                                                                         |
|                                  |                                                                                                                                                                               | *autoimmune agg*                                                                                                                                                                                                                         |
| Crohn's disease                  |                                                                                                                                                                               | *crohn*                                                                                                                                                                                                                                  |
|                                  |                                                                                                                                                                               | *regional ent*                                                                                                                                                                                                                           |
|                                  |                                                                                                                                                                               | *granulomatous ent*                                                                                                                                                                                                                      |
|                                  |                                                                                                                                                                               | *ileocoli*                                                                                                                                                                                                                               |
|                                  |                                                                                                                                                                               | *Jejunoileitis*                                                                                                                                                                                                                          |

ANDERSEN ET AL (2023)

## PERSONS DIAGNOSED WITH COVID IN ENGLAND IN THE CPRD: A COHORT DESCRIPTION

|                              |                          |
|------------------------------|--------------------------|
| Type I diabetes              | *granulomatous col*      |
|                              | *type 1 dia*             |
|                              | *type I dia*             |
|                              | *diabetes mellitus       |
|                              | juv*                     |
|                              | *diabetes mellitus       |
|                              | *insulin dep*            |
|                              | *juvenile onset dia*     |
|                              | *juvenile-onset dia*     |
|                              | *juvenile-onset          |
|                              | *diabetes mellitus       |
|                              | type 1*                  |
|                              | *diabetes mellitus       |
|                              | type I*                  |
|                              | *diabetes type 1*        |
|                              | *diabetes type I*        |
| Ankylosing spondylitis       | *ankylosing*             |
|                              | *Bekhterev*              |
|                              | *Rheumatoid arthritis    |
|                              | of spine*                |
|                              | *spine rheum*            |
|                              | *rheumatoid arthritis    |
|                              | of*                      |
|                              | *rheumatoid* *spine*     |
| Rheumatoid arthritis         | *rheumatoid*             |
|                              | *felty*                  |
|                              | *caplan*                 |
|                              | *rheum.*                 |
|                              | *atrophic art*           |
|                              | *chronic rheumatic       |
|                              | art*                     |
|                              | *prolif* *art*           |
|                              | *lupus*                  |
| Systemic lupus erythematosus | *scleroderma*            |
| Scleroderma                  | *systemic sclero*        |
|                              | *crest s*                |
|                              | *morphea*                |
|                              | *morphoea*               |
| Ulcerative colitis           | *ulcerative* *colitis*   |
|                              | *ulcerative* *proctitis* |
|                              | *rectosigmoiditis*       |
|                              | *inflam* *polyps*        |
|                              | *left* *colitis*         |
|                              | *ulcerative* *panc*      |
|                              | *extensive* *colitis*    |
|                              | *proctosigmoiditis*      |
|                              | *backwash* *ileitis*     |
|                              | *distal* *colitis*       |
|                              | *inflam* *bowel*         |
| Immunodeficiencies           | *cvid*                   |

ANDERSEN ET AL (2023)  
 PERSONS DIAGNOSED WITH COVID IN ENGLAND IN THE CPRD: A COHORT DESCRIPTION

|                                                                               |                                                                                    |                                                                                                                                                                                                                                                                                                                                                                                                                                                                                                                                                                                     |
|-------------------------------------------------------------------------------|------------------------------------------------------------------------------------|-------------------------------------------------------------------------------------------------------------------------------------------------------------------------------------------------------------------------------------------------------------------------------------------------------------------------------------------------------------------------------------------------------------------------------------------------------------------------------------------------------------------------------------------------------------------------------------|
| Immune deficiencies                                                           |                                                                                    | <ul style="list-style-type: none"> <li>*common*</li> <li>*immunodeficienc*</li> <li>*antibody* *deficienc*</li> <li>Hyper* *igm*</li> <li>*higm*</li> <li>*good* *syndrom*</li> <li>*thymom* *deficienc*</li> <li>*severe* *combin*</li> <li>*immunodeficienc*</li> <li>*SCID*</li> <li>*aps-1*</li> <li>*pas-2*</li> <li>*polygland*</li> <li>*autoimmune*</li> <li>*autoimmune*</li> <li>*polygland*</li> <li>*polyendocrinopath*</li> <li>*ectodermal dystroph*</li> <li>*apeced*</li> <li>*ifn* *signal*</li> <li>*interferon* *signal*</li> <li>*gammaglobulinaemi*</li> </ul> |
| HIV/AIDS                                                                      | HIV                                                                                | <ul style="list-style-type: none"> <li>*HIV*</li> <li>*immunodeficiency vir*</li> </ul>                                                                                                                                                                                                                                                                                                                                                                                                                                                                                             |
| Rare neurological and severe complex life-limiting neurodisability conditions | <p>Multiple sclerosis</p> <p>Motor neurone disease</p> <p>Huntington's disease</p> | <ul style="list-style-type: none"> <li>*Multiple sclerosis*</li> <li>*sclerosis multiple*</li> <li>*encephalomyelit*</li> <li>*disseminat*</li> <li>* ms*</li> <li>*motor* *neurone* disease*</li> <li>*kennedy*</li> <li>*amyotrophic*</li> <li>*lateral **sclerosis*</li> <li>*ALS*</li> <li>*primary* *lateral* sclerosis*</li> <li>*progressive*</li> <li>*bulbar* *palsy*</li> <li>*progressive*</li> <li>*spinal* muscular*</li> <li>*atrophy*</li> <li>*huntington*</li> <li>*huntington*</li> <li>*disease*</li> <li>*Huntington*</li> <li>*chorea*</li> </ul>              |

ANDERSEN ET AL (2023)

PERSONS DIAGNOSED WITH COVID IN ENGLAND IN THE CPRD: A COHORT DESCRIPTION

---

---

Myasthenia gravis

---

---

\*myasthenia\* \*gravis\*

For peer review only

ANDERSEN ET AL (2023)

PERSONS DIAGNOSED WITH COVID IN ENGLAND IN THE CPRD: A COHORT DESCRIPTION

**Supplemental file 1, Table 4: Search Terms for PANORAMIC Eligibility Criteria Definition**

| Inclusion criteria as in PANORAMIC protocol                                                                                                                                              | Concept as operationalized by Andersen et al                                                                                                                                                                                                                                                                                                                                                                                                                                                                                                                                                                                                                                                                    | Search term                                                                                                                                                                                                                                                                                                                                                                                                                                                                                                                                                                                                                                                                                                                                                                                                                                                                                                           |
|------------------------------------------------------------------------------------------------------------------------------------------------------------------------------------------|-----------------------------------------------------------------------------------------------------------------------------------------------------------------------------------------------------------------------------------------------------------------------------------------------------------------------------------------------------------------------------------------------------------------------------------------------------------------------------------------------------------------------------------------------------------------------------------------------------------------------------------------------------------------------------------------------------------------|-----------------------------------------------------------------------------------------------------------------------------------------------------------------------------------------------------------------------------------------------------------------------------------------------------------------------------------------------------------------------------------------------------------------------------------------------------------------------------------------------------------------------------------------------------------------------------------------------------------------------------------------------------------------------------------------------------------------------------------------------------------------------------------------------------------------------------------------------------------------------------------------------------------------------|
| Chronic respiratory disease (including chronic obstructive pulmonary disease (COPD), cystic fibrosis and asthma requiring at least daily use of preventative and/or reliever medication) | Davidson, J, Warren-Gash, C and McDonald, H (2021). Clinical codelist - CPRD Aurum - chronic respiratory disease. [Data Collection]. London School of Hygiene & Tropical Medicine, London, United Kingdom.<br><a href="https://doi.org/10.17037/DATA.00002214">https://doi.org/10.17037/DATA.00002214</a> .<br><br>We also included product codes for asthma medications, using all drugs classified by the British National Formulary under the following categories:<br>Short-acting beta agonists (SABA)<br>Short-acting muscarinic antagonists (SAMA)<br>Inhaled corticosteroids (ICS)<br>Long-acting beta agonists (LABA)<br>Long-acting muscarinic antagonist (LAMA)<br>Methylxanthine<br>PDE-4 inhibitor |                                                                                                                                                                                                                                                                                                                                                                                                                                                                                                                                                                                                                                                                                                                                                                                                                                                                                                                       |
| Chronic heart or vascular disease                                                                                                                                                        | Atherosclerosis/Arteriosclerosis<br>Stenosis<br><br>Cerebrovascular disease (not including stroke/TIA - included in PANORAMIC)<br>Pulmonary embolism<br>Systolic/diastolic dysfunction<br>Chronic arrhythmias<br>Myocardial infarction<br>Hypertension<br><br>Venous thromboembolism/DVT<br><br>Heart failure<br>Atrial fibrillation<br>Ischaemic and peripheral heart disease<br><br>Congenital heart/cardiac disease<br>Various                                                                                                                                                                                                                                                                               | *athero*;*arterioscl*;*ASVD*;*obliter*;*endart*<br>*steno* *aort*;*steno* *vasc*;*steno*<br>*heart*;*steno* *card*;*strict* *aort*;*strict*<br>*vasc*;*heart* *stict*;*card* *strict*;<br>*cerebro* *disea*;*subarac* *haem*;*vasc*<br>*demen*;*arterio* *demen*;*infar* *demen*<br><br>*pul* *embo*;<br>*syst* *dys*;*dia* *dys*;*dys* *syst*<br>*AFL*;*atria* *flut*;*arrhyth*;*dysrhy*<br>*myo* *infarc*;*heart* *att*;* AMI<br>*hyperten*;*high* *blood**pres*;<br>bp*;*bp*;*bp*HBP*;*HTN*<br>*VTE*;*thrombo*;*DVT*;*blood* clot*;*pulmon*<br>*embolis*;*pe*;*pe*;*pe*;<br>*CCF*;*CHF*;*hear* *fail*;*card* *fail*;<br>* fibrilla*;* fibrilla*;* af *;*af*;* Afib*<br>*hear* *diseas*;<br>*artero* *diseas*;<br>*vasc* *diseas*;<br>*CAD*;<br>*ihd*;<br>*myocard* *isch*;<br>*chd*<br>*congen* *hear*;*congen* *card*;*CHD*<br>*Aneurysm*<br>*May-Thurner*<br>*Thoracic* *outlet*<br>*Fibromuscular*<br>*Klippel* |

ANDERSEN ET AL (2023)

PERSONS DIAGNOSED WITH COVID IN ENGLAND IN THE CPRD: A COHORT DESCRIPTION

|    |                       |                                              |
|----|-----------------------|----------------------------------------------|
|    |                       | *lymphedema*                                 |
|    |                       | *hypoten*                                    |
|    |                       | *Telangiect*                                 |
|    |                       | *Vasculit*                                   |
|    |                       | *body* *tumour*                              |
|    |                       | *Claudication*                               |
|    |                       | *Varicose*                                   |
|    |                       | *Venous* *insufficiency*                     |
|    |                       | *artery* *dissection*                        |
| 14 | Renal disease: mild   | *CKD*                                        |
| 15 | kidney disease (CKD)  | *renal* *disease*                            |
| 16 | stage 2 and 3, with   | *renal* *failure*                            |
| 17 | an eGFR               | *renal* *insufficiency*                      |
| 18 | measurement in the    | *renal* *disorder*                           |
| 19 | past 6 months         | *kidney* *disease*                           |
| 20 |                       | *kidney* *disorder*                          |
| 21 |                       | *kidney* *failure*                           |
| 22 |                       | *eGFR*                                       |
| 23 |                       | *estimated* *glomerular* *filtration* *rate* |
| 24 |                       | *disease* *renal*                            |
| 25 |                       | *failure* *renal*                            |
| 26 |                       | *insufficiency* *renal*                      |
| 27 |                       | *disorder* *renal*                           |
| 28 |                       | *disease* *kidney*                           |
| 29 |                       | *disorder* *kidney*                          |
| 30 |                       | *failure* *kidney*                           |
| 33 | Chronic liver disease | *biliary c*                                  |
| 34 | Chronic liver disease | *destructive* *chol*                         |
| 35 |                       | *cirrhos*                                    |
| 36 |                       | *sclero* *cholangit*                         |
| 37 |                       | *recurr* *cholangit*                         |
| 38 |                       | *chron* *cholangit*                          |
| 39 |                       | *chron* *hepat*                              |
| 40 |                       | *hepat* *chron*                              |
| 41 |                       | *acute* *yellow* *atroph*                    |
| 42 |                       | *hepat* *notif*                              |
| 43 |                       | *granul* *hepat*                             |
| 44 |                       | *alpha* *hepat*                              |
| 45 |                       | *hepat* *tox*                                |
| 46 |                       | *toxop* *hepat*                              |
| 47 |                       | *acute hepatitis c*                          |
| 48 |                       | *alcoh* *hepat*                              |
| 49 |                       | *subacute* *hepat*                           |
| 50 |                       | *nonspec* *hepat*                            |
| 51 |                       | *nonalco* *liver* *dis*                      |
| 52 |                       | *hepat* *malaria*                            |
| 53 |                       | *malaria* *hepat*                            |
| 54 |                       | *autoimm* *hepat*                            |
| 55 |                       | *hepatitis c without*                        |

ANDERSEN ET AL (2023)

PERSONS DIAGNOSED WITH COVID IN ENGLAND IN THE CPRD: A COHORT DESCRIPTION

|    |                                                                     |                                                                                                                                                                                                                                                                                              |
|----|---------------------------------------------------------------------|----------------------------------------------------------------------------------------------------------------------------------------------------------------------------------------------------------------------------------------------------------------------------------------------|
|    |                                                                     | '*toxic* *hepat*'                                                                                                                                                                                                                                                                            |
|    |                                                                     | '*hepatitis C*'                                                                                                                                                                                                                                                                              |
|    |                                                                     | '*sequelae* *viral* *hep*'                                                                                                                                                                                                                                                                   |
|    |                                                                     | '*chron* *liver* *dis*'                                                                                                                                                                                                                                                                      |
|    |                                                                     | '*oesoph* *varices*'                                                                                                                                                                                                                                                                         |
|    |                                                                     | '*varices* *oesoph*'                                                                                                                                                                                                                                                                         |
|    |                                                                     | '*hepat* *coma*'                                                                                                                                                                                                                                                                             |
|    |                                                                     | '**coma* *hepat*'                                                                                                                                                                                                                                                                            |
|    |                                                                     | '*enceph* *hepat*'                                                                                                                                                                                                                                                                           |
|    |                                                                     | 'hepat* *enceph*'                                                                                                                                                                                                                                                                            |
|    |                                                                     | '*sequelae* *liver*'                                                                                                                                                                                                                                                                         |
|    |                                                                     | '*liver* *sequelae*'                                                                                                                                                                                                                                                                         |
|    |                                                                     | '*portal* *hyperten*'                                                                                                                                                                                                                                                                        |
|    |                                                                     | '*hepatoren* *syndro*'                                                                                                                                                                                                                                                                       |
|    |                                                                     | '*syndro* *hepatoren*'                                                                                                                                                                                                                                                                       |
|    |                                                                     | '*eosophag* *varices*'                                                                                                                                                                                                                                                                       |
| 21 | Chronic neurological disease (including dementia, stroke, epilepsy) | Davidson, J and Warren-Gash, C (2022). Clinical codelist - CPRD Aurum - chronic neurological disease. [Data Collection]. London School of Hygiene & Tropical Medicine, London, United Kingdom. <a href="https://doi.org/10.17037/DATA.00002817">https://doi.org/10.17037/DATA.00002817</a> . |
| 25 |                                                                     | PANORAMIC criteria details epilepsy and stroke as chronic neurological conditions which were not reflected in the existing code list, and were added using the following search terms                                                                                                        |
| 29 | Epilepsy                                                            | *epilep*                                                                                                                                                                                                                                                                                     |
| 30 | Stroke                                                              | *stroke*                                                                                                                                                                                                                                                                                     |
| 31 |                                                                     | *stroke*                                                                                                                                                                                                                                                                                     |
| 32 |                                                                     | *cerebr* *infarc*                                                                                                                                                                                                                                                                            |
| 33 |                                                                     | *cerebr* *acc*                                                                                                                                                                                                                                                                               |
| 34 |                                                                     | *CVA*                                                                                                                                                                                                                                                                                        |
| 35 |                                                                     | *Tran* *ischemic*                                                                                                                                                                                                                                                                            |
| 37 | Severe and profound learning disability                             | *learning* *dis*                                                                                                                                                                                                                                                                             |
| 38 |                                                                     | *learning* *diff*                                                                                                                                                                                                                                                                            |
| 39 |                                                                     | *retard*                                                                                                                                                                                                                                                                                     |
| 41 | Angelman syndrome                                                   | *angelman*                                                                                                                                                                                                                                                                                   |
| 42 | Coffin-Lowry syndrome                                               | *Coffin-lowry*                                                                                                                                                                                                                                                                               |
| 43 | Cornelia de lange syndrome                                          | *cornelia* *lange*                                                                                                                                                                                                                                                                           |
| 44 | Cri du chat syndrome                                                | *cri du chat*                                                                                                                                                                                                                                                                                |
| 45 |                                                                     | *5p Deletion*                                                                                                                                                                                                                                                                                |
| 46 |                                                                     | *cat* *cry*                                                                                                                                                                                                                                                                                  |
| 47 | Dubowitz's syndrome                                                 | *dubowitz*                                                                                                                                                                                                                                                                                   |
| 48 | Edward's syndrome                                                   | *edwards* *synd*                                                                                                                                                                                                                                                                             |
| 49 |                                                                     | *Trisomy* *18*                                                                                                                                                                                                                                                                               |
| 50 | Hurler's syndrome                                                   | *hurler*                                                                                                                                                                                                                                                                                     |
| 51 |                                                                     | *mucopolysacc*                                                                                                                                                                                                                                                                               |
| 52 | Laurence-Moon Syndrome                                              | *laurence-moon*                                                                                                                                                                                                                                                                              |
| 53 | Mowat-Wilson syndrome                                               | *Mowat-Wilson*                                                                                                                                                                                                                                                                               |
| 54 | Patau syndrome                                                      | *Patau*                                                                                                                                                                                                                                                                                      |
| 55 |                                                                     | *Trisomy* *13*                                                                                                                                                                                                                                                                               |



ANDERSEN ET AL (2023)

## PERSONS DIAGNOSED WITH COVID IN ENGLAND IN THE CPRD: A COHORT DESCRIPTION

|                                                                                                                                                                                                                                                                                    |                                                                                                                                                                                                                                                                     |                                                                                                            |
|------------------------------------------------------------------------------------------------------------------------------------------------------------------------------------------------------------------------------------------------------------------------------------|---------------------------------------------------------------------------------------------------------------------------------------------------------------------------------------------------------------------------------------------------------------------|------------------------------------------------------------------------------------------------------------|
|                                                                                                                                                                                                                                                                                    | Rett syndrome                                                                                                                                                                                                                                                       | *rett *                                                                                                    |
|                                                                                                                                                                                                                                                                                    | Smith-Magenis syndrome                                                                                                                                                                                                                                              | *Smith-Magenis*                                                                                            |
|                                                                                                                                                                                                                                                                                    |                                                                                                                                                                                                                                                                     | *Chromosome* *deletion*                                                                                    |
|                                                                                                                                                                                                                                                                                    | Wolff - Hirschorn syndrome                                                                                                                                                                                                                                          | *wolf* *Hirs*                                                                                              |
| Down's syndrome                                                                                                                                                                                                                                                                    | Down's syndrome                                                                                                                                                                                                                                                     | *down*                                                                                                     |
|                                                                                                                                                                                                                                                                                    |                                                                                                                                                                                                                                                                     | *trisom*                                                                                                   |
|                                                                                                                                                                                                                                                                                    |                                                                                                                                                                                                                                                                     | *mongol*                                                                                                   |
| Diabetes mellitus<br>(Type I or Type II)                                                                                                                                                                                                                                           | Type I                                                                                                                                                                                                                                                              | *type 1 dia*                                                                                               |
|                                                                                                                                                                                                                                                                                    |                                                                                                                                                                                                                                                                     | *type I dia*                                                                                               |
|                                                                                                                                                                                                                                                                                    |                                                                                                                                                                                                                                                                     | *diabetes mellitus juv*                                                                                    |
|                                                                                                                                                                                                                                                                                    |                                                                                                                                                                                                                                                                     | *diabetes mellitus                                                                                         |
|                                                                                                                                                                                                                                                                                    |                                                                                                                                                                                                                                                                     | *insulin dep*                                                                                              |
|                                                                                                                                                                                                                                                                                    |                                                                                                                                                                                                                                                                     | *juvenile onset dia*                                                                                       |
|                                                                                                                                                                                                                                                                                    |                                                                                                                                                                                                                                                                     | *juvenile-onset dia*                                                                                       |
|                                                                                                                                                                                                                                                                                    |                                                                                                                                                                                                                                                                     | *juvenile-onset                                                                                            |
|                                                                                                                                                                                                                                                                                    |                                                                                                                                                                                                                                                                     | *diabetes mellitus type 1*                                                                                 |
|                                                                                                                                                                                                                                                                                    |                                                                                                                                                                                                                                                                     | *diabetes mellitus type I*                                                                                 |
|                                                                                                                                                                                                                                                                                    |                                                                                                                                                                                                                                                                     | *diabetes type 1*                                                                                          |
|                                                                                                                                                                                                                                                                                    |                                                                                                                                                                                                                                                                     | *diabetes type I*                                                                                          |
|                                                                                                                                                                                                                                                                                    | Type II                                                                                                                                                                                                                                                             | *type 2 dia*                                                                                               |
|                                                                                                                                                                                                                                                                                    |                                                                                                                                                                                                                                                                     | *type II dia*                                                                                              |
|                                                                                                                                                                                                                                                                                    |                                                                                                                                                                                                                                                                     | *adult onset dia*                                                                                          |
|                                                                                                                                                                                                                                                                                    |                                                                                                                                                                                                                                                                     | *adult-onset dia*                                                                                          |
|                                                                                                                                                                                                                                                                                    |                                                                                                                                                                                                                                                                     | *non-insulin dep*                                                                                          |
|                                                                                                                                                                                                                                                                                    |                                                                                                                                                                                                                                                                     | *noninsulin dep*                                                                                           |
|                                                                                                                                                                                                                                                                                    |                                                                                                                                                                                                                                                                     | *non-insulin-dep*                                                                                          |
|                                                                                                                                                                                                                                                                                    |                                                                                                                                                                                                                                                                     | *NIDDM*                                                                                                    |
|                                                                                                                                                                                                                                                                                    |                                                                                                                                                                                                                                                                     | *T2D*                                                                                                      |
|                                                                                                                                                                                                                                                                                    |                                                                                                                                                                                                                                                                     | *diabetes type 2*                                                                                          |
|                                                                                                                                                                                                                                                                                    |                                                                                                                                                                                                                                                                     | *diabetes mellitus type 2*                                                                                 |
|                                                                                                                                                                                                                                                                                    |                                                                                                                                                                                                                                                                     | *diabetes type II*                                                                                         |
|                                                                                                                                                                                                                                                                                    |                                                                                                                                                                                                                                                                     | *diabetes mellitus type II*                                                                                |
|                                                                                                                                                                                                                                                                                    |                                                                                                                                                                                                                                                                     | type 2*                                                                                                    |
|                                                                                                                                                                                                                                                                                    |                                                                                                                                                                                                                                                                     | type II*                                                                                                   |
|                                                                                                                                                                                                                                                                                    |                                                                                                                                                                                                                                                                     | *diabetes mellitus adult*                                                                                  |
| Immunosuppression:<br>primary (e.g.,<br>inherited immune<br>disorders resulting<br>from genetic<br>mutations, usually<br>present at birth and<br>diagnosed in<br>childhood) or<br>secondary due to<br>disease or treatment<br>(e.g., sickle cell, HIV,<br>cancer,<br>chemotherapy) | Forbes, H (2020). Therapy Code List - Immunosuppression Aurum Therapy Codes. [Data Collection]. London School of Hygiene & Tropical Medicine, London, United Kingdom. <a href="https://doi.org/10.17037/DATA.00001589">https://doi.org/10.17037/DATA.00001589</a> . | We filtered among therapy codes for moderate immunosuppression for those drugs classified as chemotherapy. |

ANDERSEN ET AL (2023)

## PERSONS DIAGNOSED WITH COVID IN ENGLAND IN THE CPRD: A COHORT DESCRIPTION

|    |                       |                                                                                                      |                            |
|----|-----------------------|------------------------------------------------------------------------------------------------------|----------------------------|
| 1  |                       |                                                                                                      |                            |
| 2  |                       |                                                                                                      |                            |
| 3  | Solid organ, bone     | Forbes, H (2020). Clinical Code List - Moderate Immunosuppression OPCS Codes.                        |                            |
| 4  | marrow and stem cell  | [Data Collection]. London School of Hygiene & Tropical Medicine, London, United                      |                            |
| 5  | transplant recipients | Kingdom. <a href="https://doi.org/10.17037/DATA.00001587">https://doi.org/10.17037/DATA.00001587</a> |                            |
| 6  |                       | Any transplant                                                                                       | *transplant*               |
| 7  |                       | Solid organ transplant                                                                               | *organ* *recipient*        |
| 8  |                       |                                                                                                      | *heart* *recipient*        |
| 9  |                       |                                                                                                      | *lung* *recipient*         |
| 10 |                       |                                                                                                      | *pancreas* *recipient*     |
| 11 |                       |                                                                                                      | *kidney* *recipient*       |
| 12 |                       |                                                                                                      | *intestine* *recipient*    |
| 13 |                       |                                                                                                      | *gland* *recipient*        |
| 14 |                       |                                                                                                      | *stomach* *recipient*      |
| 15 |                       |                                                                                                      | *spleen* *recipient*       |
| 16 |                       |                                                                                                      | *liver* *recipient*        |
| 17 |                       |                                                                                                      | *bladder* *recipient*      |
| 18 |                       | Bone marrow transplant                                                                               | *marrow* *graft*           |
| 19 |                       |                                                                                                      | *graft* *marrow*           |
| 20 |                       | Stem cell transplant                                                                                 | *stem* *transplant*        |
| 21 |                       |                                                                                                      | *transplant* *stem*        |
| 22 |                       |                                                                                                      | *stem* graft*              |
| 23 |                       |                                                                                                      | *graft* *stem*             |
| 24 |                       |                                                                                                      | *obes*                     |
| 25 | Morbid obesity (BMI   |                                                                                                      | *BMI*                      |
| 26 | > 35)                 |                                                                                                      |                            |
| 27 | Severe mental illness | Severe mental illness,                                                                               | *severe* *ment*            |
| 28 |                       | unspecified                                                                                          | *acute* *ment*             |
| 29 |                       |                                                                                                      | *severe* *psy*             |
| 30 |                       |                                                                                                      | *acute* *psy*              |
| 31 |                       |                                                                                                      | *nervous break*            |
| 32 |                       | Schizophrenia                                                                                        | *schiz*                    |
| 33 |                       |                                                                                                      | *psycot*                   |
| 34 |                       |                                                                                                      | *psychosis*                |
| 35 |                       |                                                                                                      | *mania*                    |
| 36 |                       |                                                                                                      | mania*                     |
| 37 |                       |                                                                                                      | *manic*                    |
| 38 |                       | Bipolar disorder                                                                                     | *bipo*                     |
| 39 |                       | Self-harm                                                                                            | *self harm*                |
| 40 |                       |                                                                                                      | *cutt*                     |
| 41 |                       |                                                                                                      | *self* *in*                |
| 42 |                       |                                                                                                      | *self-i*                   |
| 43 |                       |                                                                                                      | *self-h*                   |
| 44 |                       | Obsessive-compulsive disorder                                                                        | *OCD*                      |
| 45 |                       |                                                                                                      | *obsess*                   |
| 46 |                       | Eating disorder                                                                                      | *anor*                     |
| 47 |                       |                                                                                                      | *bulimia*                  |
| 48 |                       |                                                                                                      | *eating dis*               |
| 49 |                       | Medicines for severe mental                                                                          | Agomelatine                |
| 50 |                       | illness                                                                                              | Amoxapine                  |
| 51 |                       |                                                                                                      | Clomipramine hydrochloride |
| 52 |                       |                                                                                                      | Dosulepin hydrochloride    |
| 53 |                       |                                                                                                      | Doxepin hydrochloride      |
| 54 |                       |                                                                                                      | Imipramine hydrochloride   |
| 55 |                       |                                                                                                      |                            |
| 56 |                       |                                                                                                      |                            |
| 57 |                       |                                                                                                      |                            |
| 58 |                       |                                                                                                      |                            |
| 59 |                       |                                                                                                      |                            |
| 60 |                       |                                                                                                      |                            |

ANDERSEN ET AL (2023)

## PERSONS DIAGNOSED WITH COVID IN ENGLAND IN THE CPRD: A COHORT DESCRIPTION

|                                                                                                                                                                                                                                |                                                                                                               |
|--------------------------------------------------------------------------------------------------------------------------------------------------------------------------------------------------------------------------------|---------------------------------------------------------------------------------------------------------------|
|                                                                                                                                                                                                                                | Isocarboxazid                                                                                                 |
|                                                                                                                                                                                                                                | Lofepamine hydrochloride                                                                                      |
|                                                                                                                                                                                                                                | Loxapine succinate                                                                                            |
|                                                                                                                                                                                                                                | Moclobemide                                                                                                   |
|                                                                                                                                                                                                                                | Nefazodone hydrochloride                                                                                      |
|                                                                                                                                                                                                                                | Phenelzine sulfate                                                                                            |
|                                                                                                                                                                                                                                | Reboxetine mesilate                                                                                           |
|                                                                                                                                                                                                                                | Tranlycypromine sulfate                                                                                       |
|                                                                                                                                                                                                                                | Trazodone hydrochloride                                                                                       |
|                                                                                                                                                                                                                                | Trimipramine maleate                                                                                          |
|                                                                                                                                                                                                                                | Venlafaxine hydrochloride                                                                                     |
|                                                                                                                                                                                                                                | Vortioxetine hydrobromide                                                                                     |
| Community and care<br>home resident                                                                                                                                                                                            | *nursing home*<br>*home* *nursing*<br>*care* *home*<br>*home* *care*<br>*residen* *care*<br>*care* *resident* |
| Judged by recruiting<br>medically qualified<br>professional,<br>research nurse,<br>nurse prescriber,<br>prescribing<br>pharmacist,<br>dependent on the ISA<br>for the specific IMP<br>involved, to be<br>clinically vulnerable | Unable to define, given nature of secondary database research.                                                |

ANDERSEN ET AL (2023)

PERSONS DIAGNOSED WITH COVID IN ENGLAND IN THE CPRD: A COHORT DESCRIPTION

**Supplemental file 1, Table 5: Search Terms for UK Health Security Agency Clinical Risk Group Definition**

| Classification as written in Green Book                                | Concept as written in Green Book                                                                                        | Search terms                                                                                                                                                                                                                                                                                                |
|------------------------------------------------------------------------|-------------------------------------------------------------------------------------------------------------------------|-------------------------------------------------------------------------------------------------------------------------------------------------------------------------------------------------------------------------------------------------------------------------------------------------------------|
| Chronic respiratory disease – individuals with a severe lung condition | Poorly controlled asthma                                                                                                | Asthma with an oral corticosteroid use in the past 24 months                                                                                                                                                                                                                                                |
|                                                                        | Chronic obstructive pulmonary disease (COPD), including chronic bronchitis and emphysema                                | Davidson, J, Warren-Gash, C and Mcdonald, H (2021). Clinical codelist - CPRD Aurum - chronic respiratory disease. [Data Collection]. London School of Hygiene & Tropical Medicine, London, United Kingdom.<br><a href="https://doi.org/10.17037/DATA.00002214">https://doi.org/10.17037/DATA.00002214</a> . |
|                                                                        | Bronchiectasis                                                                                                          | *bronchiec*                                                                                                                                                                                                                                                                                                 |
|                                                                        | Cystic fibrosis                                                                                                         | Davidson, J, Warren-Gash, C and Mcdonald, H (2021). Clinical codelist - CPRD Aurum - chronic respiratory disease. [Data Collection]. London School of Hygiene & Tropical Medicine, London, United Kingdom.<br><a href="https://doi.org/10.17037/DATA.00002214">https://doi.org/10.17037/DATA.00002214</a> . |
| Chronic heart disease and vascular disease                             | Interstitial lung fibrosis                                                                                              | *pulmon* *fibros*<br>*lung* *fibros*<br>*fibros* *lung*<br>*ipf*                                                                                                                                                                                                                                            |
|                                                                        | Pneumoconiosis                                                                                                          | *pneumocon*<br>*asbestosis*<br>*silicos*                                                                                                                                                                                                                                                                    |
|                                                                        | Bronchopulmonary dysplasia (BPD)                                                                                        | *broncho* *dysplas*<br>*BDP*                                                                                                                                                                                                                                                                                |
| Chronic heart disease and vascular disease                             | Congenital heart disease                                                                                                | *congen* *hear*<br>*congen* *card*<br>*CHD*                                                                                                                                                                                                                                                                 |
|                                                                        | Hypertension with cardiac complications                                                                                 | *hyperten*<br>*high* *blood* *pres*<br>* bp *<br>*bp*<br>*HBP*<br>*HTN*                                                                                                                                                                                                                                     |
|                                                                        | Chronic heart failure                                                                                                   | *CCF*<br>*CHF*<br>*hear* *fail*<br>*card* *fail*                                                                                                                                                                                                                                                            |
|                                                                        | Individuals requiring regular medication and/or follow-up for ischaemic heart disease (includes individuals with atrial | *hear* *diseas*<br>*artero* *diseas*<br>*vasc* *diseas*<br>*CAD*<br>*ihd*                                                                                                                                                                                                                                   |

ANDERSEN ET AL (2023)

## PERSONS DIAGNOSED WITH COVID IN ENGLAND IN THE CPRD: A COHORT DESCRIPTION

|                        |                                                                                   |                                                                                                                                                                                                                                                                                                                                                                                             |
|------------------------|-----------------------------------------------------------------------------------|---------------------------------------------------------------------------------------------------------------------------------------------------------------------------------------------------------------------------------------------------------------------------------------------------------------------------------------------------------------------------------------------|
|                        | fibrillation, peripheral vascular disease or a history of venous thromboembolism) | *myocard*<br>*isch*<br>*chd*<br>*fibrilla*<br>*afib*<br>*VTE*<br>*thrombo*<br>*DVT*<br>*blood* *clot*<br>*pulmon* *embolis*<br>* pe *                                                                                                                                                                                                                                                       |
| Chronic kidney disease | At stage 3, 4 or 5<br>Chronic kidney failure                                      | *CKD*<br>*renal* *disease*<br>*renal* *failure*<br>*renal* *insufficiency*<br>*renal* *disorder*<br>*kidney* *disease*<br>*kidney* *disorder*<br>*kidney* *failure*<br>*eGFR*<br>*estimated* *glomerular* *filtration* *rate*<br>*disease* *renal*<br>*failure* *renal*<br>*insufficiency* *renal*<br>*disorder* *renal*<br>*disease* *kidney*<br>*disorder* *kidney*<br>*failure* *kidney* |
|                        | Nephrotic syndrome<br>Kidney transplantation                                      | *nephro*<br>Davidson, J, Warren-Gash, C, Mcdonald, H, Evans, D and Clay, S (2021). Clinical codelist - chronic kidney disease. [Data Collection]. London School of Hygiene & Tropical Medicine, London, United Kingdom.<br><a href="https://doi.org/10.17037/DATA.00002406">https://doi.org/10.17037/DATA.00002406</a> .                                                                    |
|                        |                                                                                   | We selected transplant-specific codes.                                                                                                                                                                                                                                                                                                                                                      |
| Chronic liver disease  | Chronic hepatitis                                                                 | *chron* *hepat* <sup>1</sup><br>*hepat* *chron* <sup>1</sup><br>*acute* *yellow* *atroph* <sup>1</sup><br>*hepat* *notif* <sup>1</sup><br>*granul* *hepat* <sup>1</sup><br>*alpha* *hepat* <sup>1</sup><br>*hepat* *tox* <sup>1</sup><br>*toxop* *hepat* <sup>1</sup><br>*acute hepatitis c* <sup>1</sup><br>*alcoh* *hepat* <sup>1</sup><br>*subacute* *hepat* <sup>1</sup>                |

ANDERSEN ET AL (2023)

PERSONS DIAGNOSED WITH COVID IN ENGLAND IN THE CPRD: A COHORT DESCRIPTION

|    |                      |                              |                          |
|----|----------------------|------------------------------|--------------------------|
| 1  |                      |                              | *nonspec* *hepat*        |
| 2  |                      |                              | *nonalco* *liver* *dis*  |
| 3  |                      |                              | *hepat* *malaria*        |
| 4  |                      |                              | *malaria* *hepat*        |
| 5  |                      |                              | *autoimm* *hepat*        |
| 6  |                      |                              | *hepatitis c without*    |
| 7  |                      |                              | *toxic* *hepat*          |
| 8  |                      |                              | *hepatitis C*            |
| 9  |                      |                              | *sequelae* *viral* *hep* |
| 10 |                      |                              | *chron* *liver* *dis*    |
| 11 |                      |                              | *oesoph* *varices*       |
| 12 |                      |                              | *varices* *oesoph*       |
| 13 |                      |                              | *hepat* *coma*           |
| 14 |                      |                              | **coma* *hepat*          |
| 15 |                      |                              | *enceph* *hepat*         |
| 16 |                      |                              | hepat* *enceph*          |
| 17 |                      |                              | *sequelae* *liver*       |
| 18 |                      |                              | *liver* *sequelae*       |
| 19 |                      |                              | *portal* *hyperten*      |
| 20 |                      |                              | *hepatoren* *syndro*     |
| 21 |                      |                              | *syndro* *hepatoren*     |
| 22 |                      |                              | *oesophag* *varices*     |
| 23 |                      |                              | *cirrhos*                |
| 24 |                      |                              | *biliary c*              |
| 25 |                      |                              | *destructive* *chol*     |
| 26 |                      |                              | *sclero* *cholangit*     |
| 27 |                      |                              | *recurr* *cholangit*     |
| 28 |                      |                              | *chron* *cholangit*      |
| 29 |                      |                              |                          |
| 30 |                      |                              |                          |
| 31 |                      |                              |                          |
| 32 |                      |                              |                          |
| 33 |                      |                              |                          |
| 34 | Chronic neurological | Stroke                       | *stroke*                 |
| 35 | disease              |                              | *cerebr* *infarc*        |
| 36 |                      |                              | *cerebr* *acc*           |
| 37 |                      |                              | *CVA*                    |
| 38 |                      | Transient ischaemic          | *tran* *ischemic*        |
| 39 |                      | attack (TIA)                 |                          |
| 40 |                      | Conditions in which          | *polio*                  |
| 41 |                      | respiratory function may     | *infant* *parlay*        |
| 42 |                      | be compromised due to        | *heine* *dis*            |
| 43 |                      | neurological or              |                          |
| 44 |                      | neuromuscular disease        |                          |
| 45 |                      | (e.g. polio syndrome         |                          |
| 46 |                      | sufferers)                   |                          |
| 47 |                      | Cerebral palsy               | *cereb* *palsy*          |
| 48 |                      |                              | *cereb palsy*            |
| 49 |                      |                              | *cp*                     |
| 50 |                      | Severe or profound and       | *learning* *dis*         |
| 51 |                      | multiple learning            | *learning* *diff*        |
| 52 |                      | disabilities (PMLD)          | *retard*                 |
| 53 |                      | including all those on the   | *angelman*               |
| 54 |                      | learning disability register | *Coffin-lowry*           |
| 55 |                      |                              | *cornelia* *lange*       |
| 56 |                      |                              |                          |
| 57 |                      |                              |                          |
| 58 |                      |                              |                          |
| 59 |                      |                              |                          |
| 60 |                      |                              |                          |

ANDERSEN ET AL (2023)

PERSONS DIAGNOSED WITH COVID IN ENGLAND IN THE CPRD: A COHORT DESCRIPTION

|                                                    |                                                                                                                                                                                 |                                             |
|----------------------------------------------------|---------------------------------------------------------------------------------------------------------------------------------------------------------------------------------|---------------------------------------------|
|                                                    |                                                                                                                                                                                 | *cri du chat*                               |
|                                                    |                                                                                                                                                                                 | *5p Deletion*                               |
|                                                    |                                                                                                                                                                                 | *cat* *cry*                                 |
|                                                    |                                                                                                                                                                                 | *dubowitz*                                  |
|                                                    |                                                                                                                                                                                 | *edwards* *synd*                            |
|                                                    |                                                                                                                                                                                 | *Trisomy* *18*                              |
|                                                    |                                                                                                                                                                                 | *hurler*                                    |
|                                                    |                                                                                                                                                                                 | *mucopolysacc*                              |
|                                                    |                                                                                                                                                                                 | *laurence-moon*                             |
|                                                    |                                                                                                                                                                                 | *Mowat-Wilson*                              |
|                                                    |                                                                                                                                                                                 | *Patau*                                     |
|                                                    |                                                                                                                                                                                 | *Trisomy* *13*                              |
|                                                    |                                                                                                                                                                                 | *rett *                                     |
|                                                    |                                                                                                                                                                                 | *Smith-Magenis*                             |
|                                                    |                                                                                                                                                                                 | *Chromosome* *deletion*                     |
|                                                    |                                                                                                                                                                                 | *wolf* *Hirs*                               |
|                                                    | Down's syndrome                                                                                                                                                                 | *down*                                      |
|                                                    |                                                                                                                                                                                 | *trisomy*                                   |
|                                                    |                                                                                                                                                                                 | *mongol*                                    |
|                                                    | Multiple sclerosis                                                                                                                                                              | *multiple sclerosis*                        |
|                                                    |                                                                                                                                                                                 | *sclerosis multiple*                        |
|                                                    |                                                                                                                                                                                 | *encephalomyelit* *disseminat*              |
|                                                    |                                                                                                                                                                                 | *ms*                                        |
|                                                    | Epilepsy                                                                                                                                                                        | *epilep*                                    |
|                                                    | Dementia                                                                                                                                                                        | *demen*                                     |
|                                                    |                                                                                                                                                                                 | *senil*                                     |
|                                                    | Parkinson's disease                                                                                                                                                             | *parkinson*                                 |
|                                                    |                                                                                                                                                                                 | *hypo* *rigid*                              |
|                                                    |                                                                                                                                                                                 | *parlay* *agit*                             |
|                                                    |                                                                                                                                                                                 | *shak* *pals*                               |
|                                                    |                                                                                                                                                                                 | *pd *                                       |
|                                                    | Motor neurone disease<br>and related or similar<br>conditions, hereditary and<br>degenerative disease of<br>the nervous system or<br>muscles, severe<br>neurological disability | *motor* *neurone* *disease*                 |
|                                                    |                                                                                                                                                                                 | *kennedy*                                   |
|                                                    |                                                                                                                                                                                 | *amyotrophic* *lateral* *sclerosis*         |
|                                                    |                                                                                                                                                                                 | *ALS*                                       |
|                                                    |                                                                                                                                                                                 | *primary* *lateral* *sclerosis*             |
|                                                    |                                                                                                                                                                                 | *progressive* *bulbar* *palsy*              |
|                                                    |                                                                                                                                                                                 | *progressive* *spinal* *muscular* *atrophy* |
|                                                    |                                                                                                                                                                                 | *myo*                                       |
| Diabetes mellitus and<br>other endocrine disorders | Type I                                                                                                                                                                          | *type 1 dia*                                |
|                                                    |                                                                                                                                                                                 | *type I dia*                                |
|                                                    |                                                                                                                                                                                 | *diabetes mellitus juv*                     |
|                                                    |                                                                                                                                                                                 | *diabetes mellitus                          |
|                                                    |                                                                                                                                                                                 | *insulin dep*                               |
|                                                    |                                                                                                                                                                                 | *juvenile onset dia*                        |
|                                                    |                                                                                                                                                                                 | *juvenile-onset dia*                        |
|                                                    |                                                                                                                                                                                 | *juvenile-onset                             |
|                                                    |                                                                                                                                                                                 | *diabetes mellitus type 1*                  |
|                                                    |                                                                                                                                                                                 | *diabetes mellitus type I*                  |
|                                                    |                                                                                                                                                                                 | *diabetes type 1*                           |

ANDERSEN ET AL (2023)

## PERSONS DIAGNOSED WITH COVID IN ENGLAND IN THE CPRD: A COHORT DESCRIPTION

|    |                         |                         |                                                                                               |
|----|-------------------------|-------------------------|-----------------------------------------------------------------------------------------------|
| 1  |                         |                         |                                                                                               |
| 2  |                         |                         |                                                                                               |
| 3  |                         |                         |                                                                                               |
| 4  |                         | Type II                 | *diabetes type I*                                                                             |
| 5  |                         |                         | *type 2 dia*                                                                                  |
| 6  |                         |                         | *type II dia*                                                                                 |
| 7  |                         |                         | *adult onset dia*                                                                             |
| 8  |                         |                         | *adult-onset dia*                                                                             |
| 9  |                         |                         | *non-insulin dep*                                                                             |
| 10 |                         |                         | *noninsulin dep*                                                                              |
| 11 |                         |                         | *non-insulin-dep*                                                                             |
| 12 |                         |                         | *NIDDM*                                                                                       |
| 13 |                         |                         | *T2D*                                                                                         |
| 14 |                         |                         | *diabetes type 2*                                                                             |
| 15 |                         |                         | *diabetes mellitus type 2*                                                                    |
| 16 |                         |                         | *diabetes type II*                                                                            |
| 17 |                         |                         | *diabetes mellitus type II*                                                                   |
| 18 |                         |                         | type 2*                                                                                       |
| 19 |                         |                         | type II*                                                                                      |
| 20 |                         |                         | *diabetes mellitus adult*                                                                     |
| 21 |                         | Addison's disease       | *Addison*                                                                                     |
| 22 |                         |                         | *adren* *insuff*                                                                              |
| 23 |                         |                         | *hypocort*                                                                                    |
| 24 |                         |                         | *hypoadren*                                                                                   |
| 25 | Immunosuppression due   | Patients undergoing     | Forbes, H (2020). Therapy Code List -                                                         |
| 26 | to disease or treatment | chemotherapy leading to | Immunosuppression Aurum Therapy                                                               |
| 27 |                         | immunosuppression       | Codes. [Data Collection]. London School of                                                    |
| 28 |                         |                         | Hygiene & Tropical Medicine, London,                                                          |
| 29 |                         |                         | United Kingdom.                                                                               |
| 30 |                         |                         | <a href="https://doi.org/10.17037/DATA.00001589">https://doi.org/10.17037/DATA.00001589</a> . |
| 31 |                         |                         |                                                                                               |
| 32 |                         |                         |                                                                                               |
| 33 |                         |                         | We filtered among therapy codes for                                                           |
| 34 |                         |                         | moderate immunosuppression for those                                                          |
| 35 |                         |                         | drugs classified as chemotherapy.                                                             |
| 36 |                         | Patients undergoing     | Davidson, J, Warren-Gash, C and                                                               |
| 37 |                         | radical radiotherapy    | Mcdonald, H (2021). Clinical codelist -                                                       |
| 38 |                         |                         | CPRD Aurum - Immuosuppressive                                                                 |
| 39 |                         |                         | conditions. [Data Collection]. London                                                         |
| 40 |                         |                         | School of Hygiene & Tropical Medicine,                                                        |
| 41 |                         |                         | London, United Kingdom.                                                                       |
| 42 |                         |                         | <a href="https://doi.org/10.17037/DATA.00002234">https://doi.org/10.17037/DATA.00002234</a> . |
| 43 |                         |                         |                                                                                               |
| 44 |                         |                         |                                                                                               |
| 45 |                         | Solid organ transplant  | We filtered for radiotherapy-specific codes.                                                  |
| 46 |                         | recipients              | *transplant*                                                                                  |
| 47 |                         |                         | *organ* *recipient**'                                                                         |
| 48 |                         |                         | *heart* *recipient**'                                                                         |
| 49 |                         |                         | *lung* *recipient**'                                                                          |
| 50 |                         |                         | *pancreas* *recipient**'                                                                      |
| 51 |                         |                         | *kidney* *recipient**'                                                                        |
| 52 |                         |                         | *intestine* *recipient**'                                                                     |
| 53 |                         |                         | *gland* *recipient**'                                                                         |
| 54 |                         |                         | *stomach* *recipient**'                                                                       |
| 55 |                         |                         | *spleen* *recipient**'                                                                        |
| 56 |                         |                         | *liver* *recipient**'                                                                         |
| 57 |                         |                         |                                                                                               |
| 58 |                         |                         |                                                                                               |
| 59 |                         |                         |                                                                                               |
| 60 |                         |                         |                                                                                               |



ANDERSEN ET AL (2023)

## PERSONS DIAGNOSED WITH COVID IN ENGLAND IN THE CPRD: A COHORT DESCRIPTION

---

|                                                                                                                                                                                                                                                                                                                                             |                                                                                                                                                                                                                                                                                                                                                                                                                            |
|---------------------------------------------------------------------------------------------------------------------------------------------------------------------------------------------------------------------------------------------------------------------------------------------------------------------------------------------|----------------------------------------------------------------------------------------------------------------------------------------------------------------------------------------------------------------------------------------------------------------------------------------------------------------------------------------------------------------------------------------------------------------------------|
|                                                                                                                                                                                                                                                                                                                                             | *bladder* *recipient* <sup>1</sup>                                                                                                                                                                                                                                                                                                                                                                                         |
| Bone marrow or stem cell transplant recipients                                                                                                                                                                                                                                                                                              | LSHTM - Forbes, H (2020). Clinical Code List - Moderate Immunosuppression OPCS Codes. [Data Collection]. London School of Hygiene & Tropical Medicine, London, United Kingdom.<br><a href="https://doi.org/10.17037/DATA.00001587">https://doi.org/10.17037/DATA.00001587</a> .                                                                                                                                            |
| HIV infection at all stages                                                                                                                                                                                                                                                                                                                 | *HIV*                                                                                                                                                                                                                                                                                                                                                                                                                      |
| Multiple myeloma or genetic disorders affecting the immune system (e.g. IRAK-4, NEMO, complement disorder, SCID)                                                                                                                                                                                                                            | *immunodeficiency vir*<br>*myelom*<br>*kahler*<br>*NEMO*<br>*nuclear* *fact*<br>*IKBK* *mut*<br>*NFKB*<br>*complement*<br>*SCID*<br>*combin* *immune*<br>*alympho*<br>*glanz* *synd*<br>*immunodef* *synd*                                                                                                                                                                                                                 |
| Individuals who are receiving immunosuppressive or immunomodulating biological therapy including, but not limited to, anti-TNF, alemtuzumab, ofatumumab, rituximab, patients receiving protein kinase inhibitors or PARP inhibitors, and individuals treated with steroid sparing agents such as cyclophosphamide and mycophenolate mofetil | Adalimumab<br>Etanercept<br>Infliximab<br>Golimumab<br>Certolizumab pegol<br>Abatacept<br>Olaparib<br>Rucaparib<br>Niraparib<br>Afatinib<br>Axitinib<br>Bosutinib<br>Cetuximab<br>Cobimetinib<br>Crizotinib<br>Cabozantinib<br>Dacomitinib<br>Dasatinib<br>Entrectinib<br>Erlotinib<br>Fostamatinib<br>Gefitinib<br>Ibrutinib<br>Imatinib<br>Lapatinib<br>Nilotinib<br>Paxopanib<br>Pegaptanib<br>Ruxolitinib<br>Sorafenib |

---

ANDERSEN ET AL (2023)

## PERSONS DIAGNOSED WITH COVID IN ENGLAND IN THE CPRD: A COHORT DESCRIPTION

|                                                                                                      |                                                                                                                                                                                                             |                                                                                                                                  |
|------------------------------------------------------------------------------------------------------|-------------------------------------------------------------------------------------------------------------------------------------------------------------------------------------------------------------|----------------------------------------------------------------------------------------------------------------------------------|
|                                                                                                      |                                                                                                                                                                                                             | Sunitinib                                                                                                                        |
|                                                                                                      |                                                                                                                                                                                                             | Vandetanib                                                                                                                       |
|                                                                                                      |                                                                                                                                                                                                             | Vemurafenib                                                                                                                      |
|                                                                                                      | Individuals treated with or likely to be treated with systemic steroids for more than a month at a dose equivalent to prednisolone at 20mg or more per day for adults                                       | Betamethasone<br>Cortisone<br>Dexamethasone<br>Hydrocortisone<br>Methylprednisolone<br>Prednisolone                              |
|                                                                                                      | Anyone with a history of haematological malignancy, including leukaemia, lymphoma, and myeloma                                                                                                              | *CMML*<br>*chronic myelom*<br>*lymph* *leuk*<br>*CLL*<br>*follic* *lymph*<br>* fl *                                              |
|                                                                                                      | Those who require long term immunosuppressive treatment for conditions including but not limited to: systemic lupus erythematosus, rheumatoid arthritis, inflammatory bowel disease, scleroderma, psoriasis | Using drugs listed above                                                                                                         |
| Asplenia or dysfunction of the spleen. This includes conditions that may lead to splenic dysfunction | Asplenia                                                                                                                                                                                                    | *asplen*<br>*heterotax*<br>*situs*<br>*ambig*<br>*sickl*<br>*SCD*<br>*thal*<br>*coelia*<br>*celia*<br>*sprue*<br>*glut* *entero* |
|                                                                                                      | Homozygous sickle cell disease                                                                                                                                                                              |                                                                                                                                  |
|                                                                                                      | Thalassemia major                                                                                                                                                                                           |                                                                                                                                  |
|                                                                                                      | Coeliac syndrome                                                                                                                                                                                            |                                                                                                                                  |
| Morbid obesity (adults with a BMI >40kg/m <sup>2</sup> )                                             | Obesity with specification of BMI >40kgm <sup>2</sup>                                                                                                                                                       | *obes*<br>*BMI*<br>Measured values using height and weight which calculate to >40 kgm <sup>2</sup>                               |
| Severe mental illness                                                                                | Schizophrenia                                                                                                                                                                                               | *schiz*<br>*psycot*<br>*psychosis*<br>* mania*<br>mania*<br>*manic*<br>*bipo*<br>*severe* *ment*                                 |
|                                                                                                      | Bipolar disorder                                                                                                                                                                                            |                                                                                                                                  |

ANDERSEN ET AL (2023)

## PERSONS DIAGNOSED WITH COVID IN ENGLAND IN THE CPRD: A COHORT DESCRIPTION

|                                                            |                                                             |                                                                                                                                                                                                  |
|------------------------------------------------------------|-------------------------------------------------------------|--------------------------------------------------------------------------------------------------------------------------------------------------------------------------------------------------|
|                                                            | Any mental illness that causes severe functional impairment | *acute* *ment*<br>*severe* *psy*<br>*acute* *psy*<br>*nervous break*<br>*self harm*<br>*cutt*<br>*self* *in*<br>*self-i*<br>*self-h*<br>*OCD*<br>*obsess*<br>*anor*<br>*bulimia*<br>*eating dis* |
| Pregnancy (all stages (first, second and third trimester)) | Pregnancy<br><br>End of pregnancy                           | *pregnan*<br>*trimest*<br>*gestat*<br>*birth*<br>*deliver*<br>*abortio*                                                                                                                          |

ANDERSEN ET AL (2023)

PERSONS DIAGNOSED WITH COVID IN ENGLAND IN THE CPRD: A COHORT DESCRIPTION

**Supplemental file 1, Table 6: Cohort Attrition**

|                                                                                                                                                                                                                                                                                 | <b>Unique person ID's</b> |
|---------------------------------------------------------------------------------------------------------------------------------------------------------------------------------------------------------------------------------------------------------------------------------|---------------------------|
| Persons of any age diagnosed with COVID from August 1, 2020 through January 31, 2022 using the May 2022 CPRD Aurum data release.                                                                                                                                                | 2,631,267                 |
| Files of "acceptable research quality", as defined by CPRD.                                                                                                                                                                                                                     | 2,631,267                 |
| Continuously registered with CPRD GP practice for at least 365 days prior to COVID diagnosis, and did not have a registration end date, practice last collection date or death date prior to COVID diagnosis.                                                                   | 2,322,875                 |
| Hospital Episode Statistics (HES) Admitted Patient Care (APC) linkage eligible.                                                                                                                                                                                                 | 2,289,708                 |
| Once ONS data were received, 42 persons were noted that should have been excluded from the final cohort because ONS death data preceded index date.                                                                                                                             | 2,289,666                 |
| Excluded persons who were admitted to the hospital on or before their primary care recorded date of COVID diagnosis. Due to mandatory GP reporting guidelines, this may be lagged from the date of true test collection and therefore not accurately reflect date of diagnosis. | 2,271,072                 |

ANDERSEN ET AL (2023)  
PERSONS DIAGNOSED WITH COVID IN ENGLAND IN THE CPRD: A COHORT DESCRIPTION

**Supplemental file 1, Figure 1: Date of Diagnosis for 2,271,072 COVID Cases in CPRD Aurum, By Care Setting, August 1, 2020 through January 31, 2022**

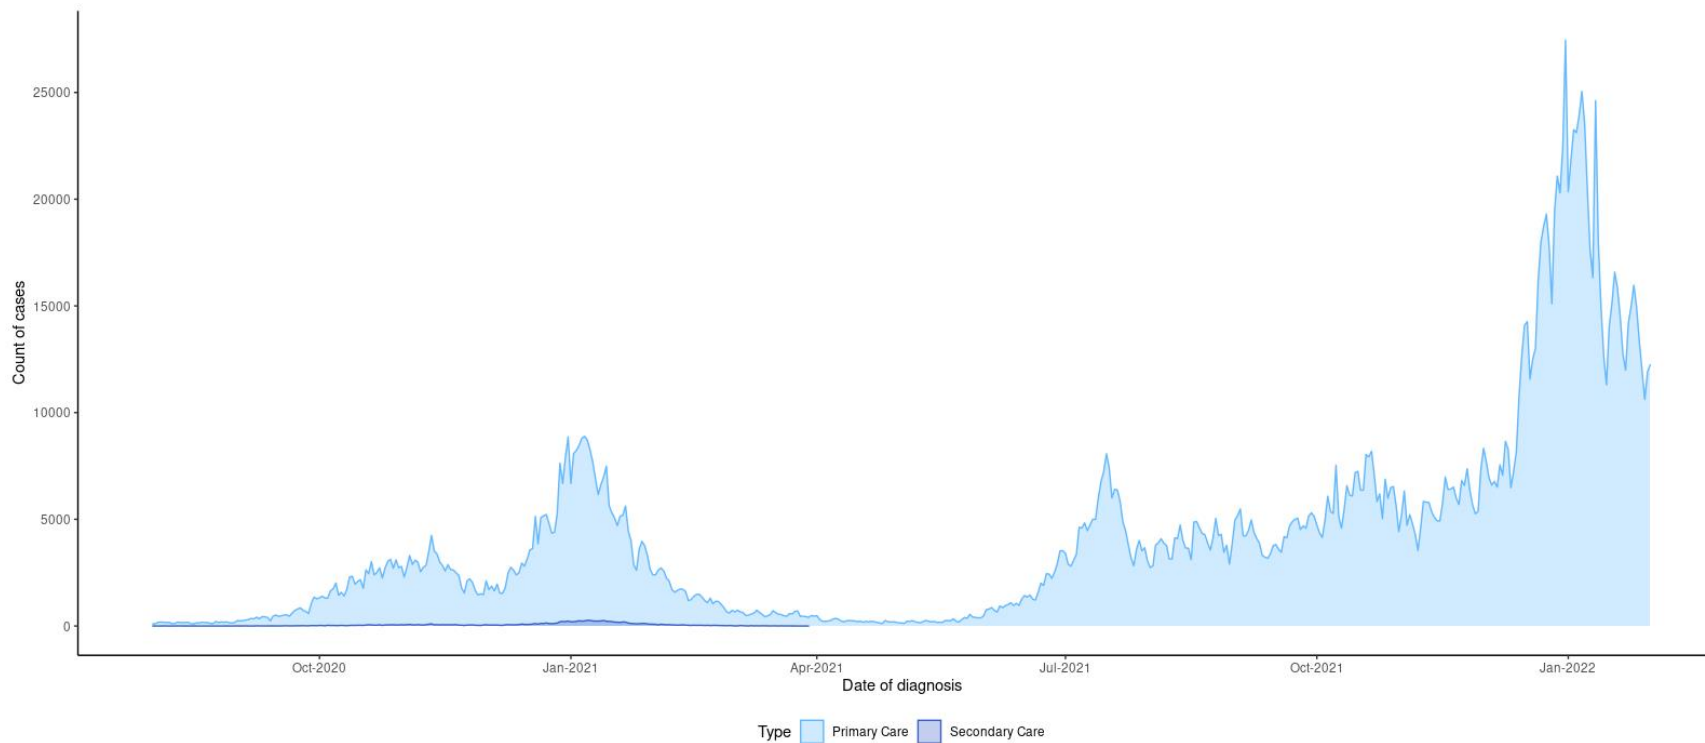

ANDERSEN ET AL (2023)  
PERSONS DIAGNOSED WITH COVID IN ENGLAND IN THE CPRD: A COHORT DESCRIPTION  
**Supplemental file 1, Figure 2: Date of Diagnosis for 2,257,907 Primary Care COVID Cases in CPRD Aurum, August 1, 2020 through January 31, 2022**

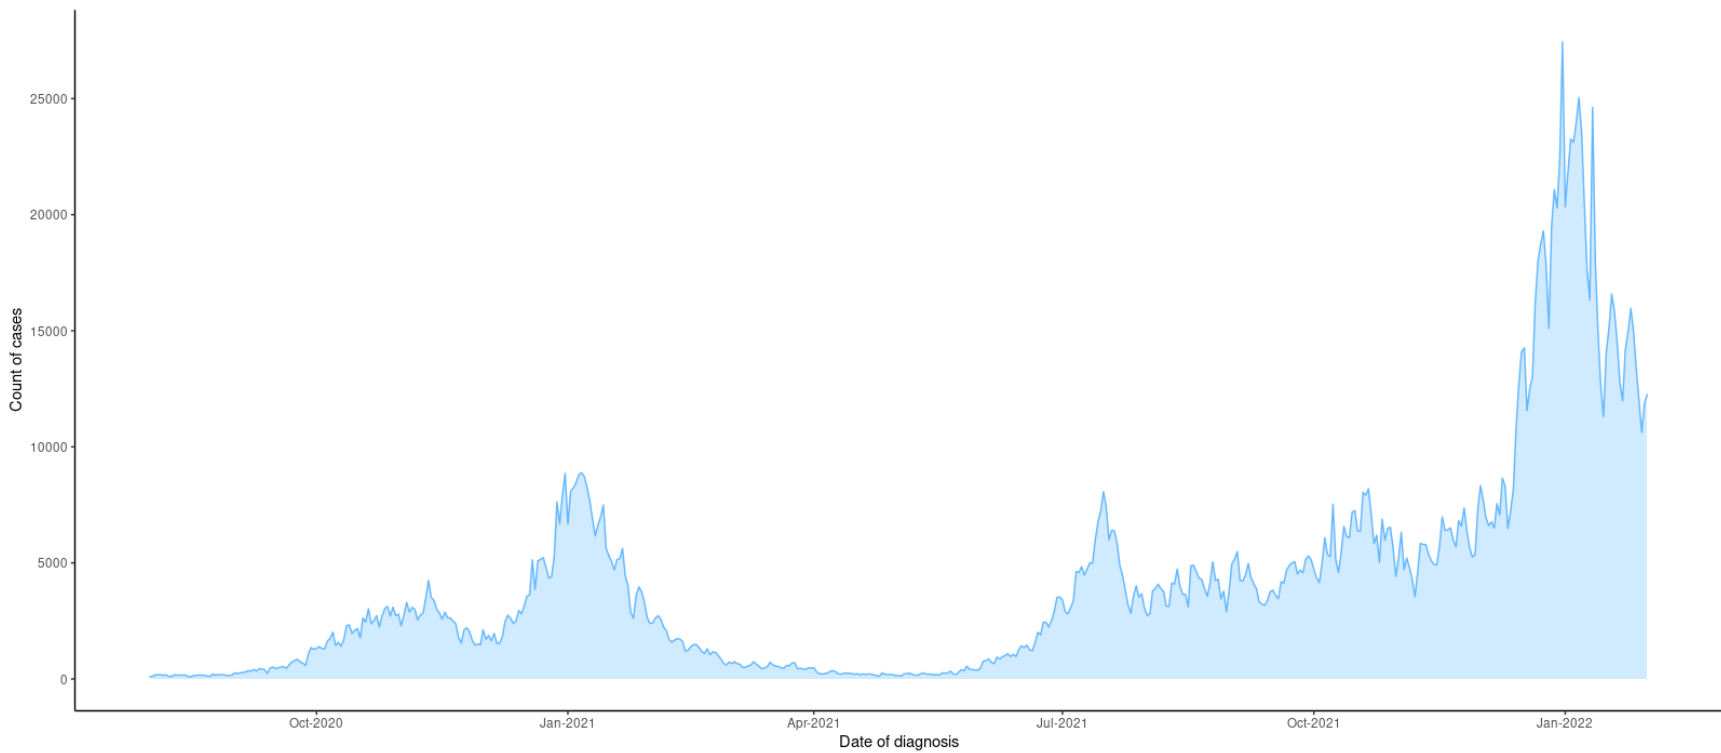

ANDERSEN ET AL (2023)

PERSONS DIAGNOSED WITH COVID IN ENGLAND IN THE CPRD: A COHORT DESCRIPTION

**Supplemental file 1, Figure 3: Date of Primary Care Recorded Diagnosis in CPRD Aurum-HES Linked Data for 13,165 Hospitalised COVID Cases, August 1, 2020 through March 31, 2021**

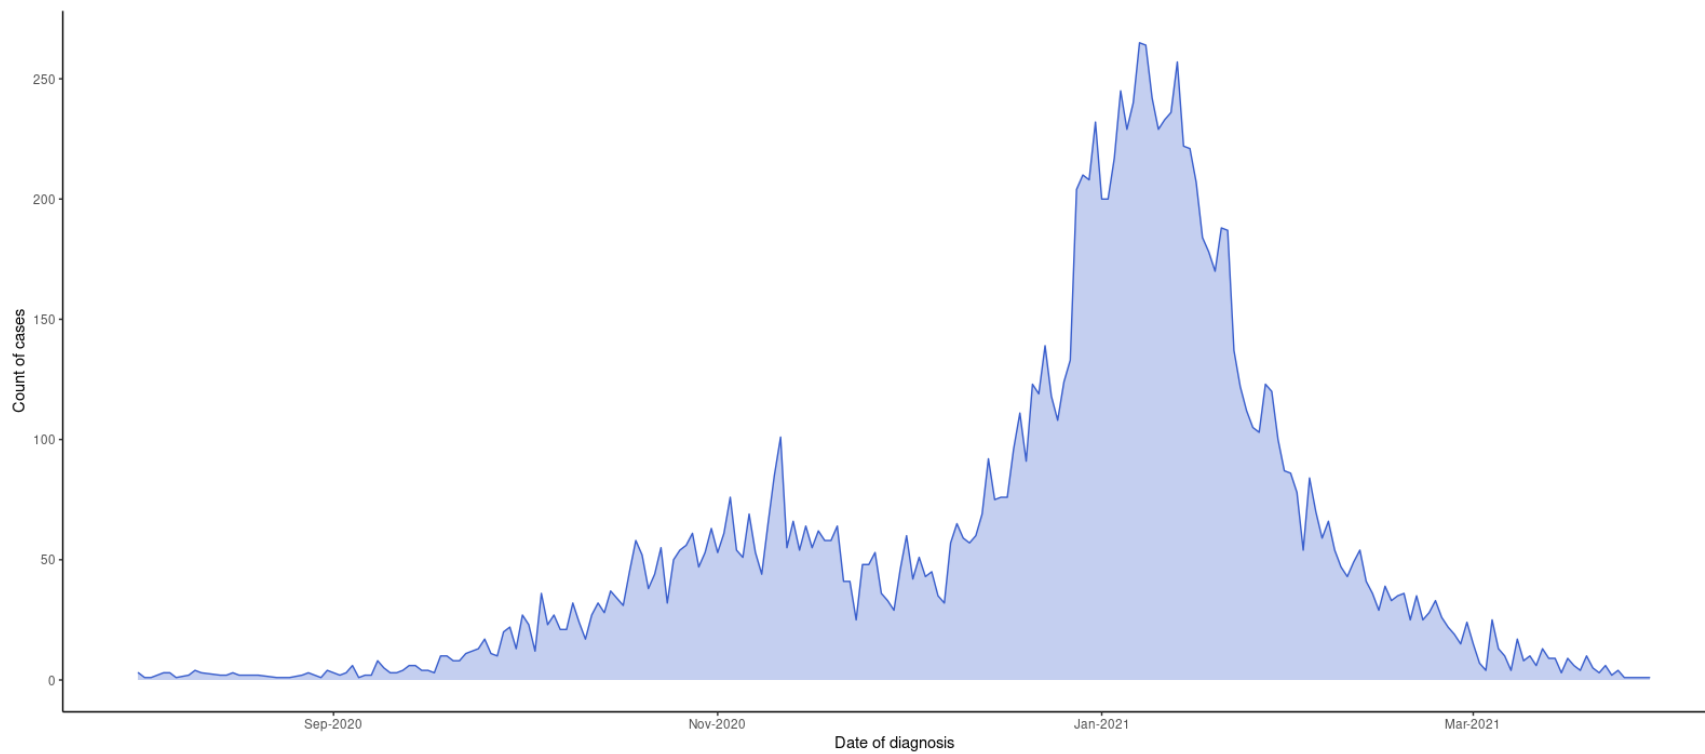

ANDERSEN ET AL (2023)

PERSONS DIAGNOSED WITH COVID IN ENGLAND IN THE CPRD: A COHORT DESCRIPTION

**Supplemental file 1, Table 7: Reference National Case Counts and Census Distributions for England**

|                            | All COVID Cases<br>(n = 20,386,786) | COVID Admissions<br>(n = 954,124) | Population of England<br>(n = 56,489,800) |
|----------------------------|-------------------------------------|-----------------------------------|-------------------------------------------|
| <b>Age groups in years</b> |                                     |                                   |                                           |
| 0-4                        | 454,587 (2%)                        | --                                | 3,077,000 (5%)                            |
| 5-9                        | 1,146,248 (6%)                      | --                                | 3,348,600 (6%)                            |
| 10-14                      | 1,626,090 (8%)                      | --                                | 3,413,100 (6%)                            |
| 15-19                      | 1,396,404 (7%)                      | --                                | 3,218,900 (6%)                            |
| 20-24                      | 1,567,499 (8%)                      | --                                | 3,414,400 (6%)                            |
| 25-29                      | 1,735,467 (9%)                      | --                                | 3,715,400 (7%)                            |
| 30-34                      | 1,795,926 (9%)                      | --                                | 3,952,600 (7%)                            |
| 35-39                      | 1,714,241 (8%)                      | --                                | 3,795,400 (7%)                            |
| 40-44                      | 1,637,287 (8%)                      | --                                | 3,580,400 (6%)                            |
| 45-49                      | 1,477,924 (7%)                      | --                                | 3,602,600 (6%)                            |
| 50-54                      | 1,431,931 (7%)                      | --                                | 3,907,700 (7%)                            |
| 55-59                      | 1,241,556 (6%)                      | --                                | 3,806,300 (7%)                            |
| 60-64                      | 929,614 (5%)                        | --                                | 3,256,100 (6%)                            |
| 65-69                      | 626,179 (3%)                        | --                                | 2,767,500 (5%)                            |
| 70-74                      | 523,000 (3%)                        | --                                | 2,796,600 (5%)                            |
| 75-79                      | 391,839 (2%)                        | --                                | 2,038,800 (4%)                            |
| 80-84                      | 277,529 (1%)                        | --                                | 1,427,900 (2%)                            |
| 85-89                      | 277,112 (1%)                        | --                                | 872,200 (2%)                              |
| 90+                        | 192,353 (1%)                        | --                                | 498,200 (< 1%)                            |
| 0-5                        | --                                  | 20,400 (2%)                       | --                                        |
| 6-17                       | --                                  | 13,942 (1%)                       | --                                        |
| 18-64                      | --                                  | 335,675 (35%)                     | --                                        |
| 65-84                      | --                                  | 379,584 (40%)                     | --                                        |
| 85+                        | --                                  | 199,497 (21%)                     | --                                        |
| Unknown                    | --                                  | 5,026 (1%)                        | --                                        |
| <b>Sex</b>                 |                                     |                                   |                                           |
| Male                       | 9,245,295 (45%)                     | --                                | 27,656,300 (49%)                          |
| Female                     | 11,141,491 (55%)                    | --                                | 28,833,500 (51%)                          |
| <b>Region</b>              |                                     |                                   |                                           |
| North East                 | 948,543 (5%)                        | --                                | 2,647,100 (5%)                            |
| North West                 | 2,582,413 (13%)                     | --                                | 7,417,300 (13%)                           |
| Yorkshire and The Humber   | 1,825,820 (9%)                      | --                                | 5,480,800 (10%)                           |
| East Midlands              | 1,623,157 (8%)                      | --                                | 4,880,200 (9%)                            |
| West Midlands              | 1,942,370 (10%)                     | --                                | 5,950,800 (11%)                           |
| East of England            | 2,101,467 (10%)                     | --                                | 6,334,500 (11%)                           |
| London                     | 2,914,578 (14%)                     | --                                | 8,799,800 (16%)                           |
| South East                 | 3,125,838 (15%)                     | --                                | 9,278,100 (16%)                           |
| South West                 | 1,834,854 (9%)                      | --                                | 5,701,200 (10%)                           |
| Unknown                    | 1,487,746 (7%)                      | --                                | --                                        |

Note: coronavirus.data.gov.uk no longer publishes case counts by age, sex or region at the day level. It was not possible to limit to the study period of August 1, 2020 – January 31, 2022, and therefore the results



1 ANDERSEN ET AL (2023)

2 PERSONS DIAGNOSED WITH COVID IN ENGLAND IN THE CPRD: A COHORT DESCRIPTION

3 above reflect the figures as accessed on January 31, 2023 of the total number of cases since the start of the  
4 pandemic.  
5  
6  
7  
8  
9  
10  
11  
12  
13  
14  
15  
16  
17  
18  
19  
20  
21  
22  
23  
24  
25  
26  
27  
28  
29  
30  
31  
32  
33  
34  
35  
36  
37  
38  
39  
40  
41  
42  
43  
44  
45  
46  
47  
48  
49  
50  
51  
52  
53  
54  
55  
56  
57  
58  
59  
60

For peer review only

ANDERSEN ET AL (2023)

PERSONS DIAGNOSED WITH COVID IN ENGLAND IN THE CPRD: A COHORT DESCRIPTION

**Supplemental file 1, Table 8: Regional Distribution of CPRD COVID cohorts, CPRD Practices, COVID Cases and Population of England**

| Region                   | CPRD Aurum                               |                                       |                         | England                          |                             |
|--------------------------|------------------------------------------|---------------------------------------|-------------------------|----------------------------------|-----------------------------|
|                          | Primary Care COVID Cases (n = 2,257,907) | Hospitalized COVID Cases (n = 13,165) | All CPRD Aurum Patients | All COVID Cases (n = 20,386,786) | Population (n = 56,489,800) |
| North East               | 4%                                       | 4%                                    | 5%                      | 5%                               | 5%                          |
| North West               | 21%                                      | 22%                                   | 17%                     | 13%                              | 13%                         |
| Yorkshire and The Humber | 3%                                       | 3%                                    | 4%                      | 9%                               | 10%                         |
| East Midlands            | 2%                                       | 2%                                    | 3%                      | 8%                               | 9%                          |
| West Midlands            | 17%                                      | 16%                                   | 18%                     | 10%                              | 11%                         |
| East of England          | 4%                                       | 3%                                    | 5%                      | 10%                              | 11%                         |
| London                   | 19%                                      | 23%                                   | 16%                     | 14%                              | 16%                         |
| South East               | 20%                                      | 20%                                   | 20%                     | 15%                              | 16%                         |
| South West               | 10%                                      | 8%                                    | 14%                     | 9%                               | 10%                         |
| Unknown                  | < 1%                                     | 0                                     |                         | 7%                               | --                          |

All CPRD Aurum patients refers figures published in "Data resource profile: Clinical Practice Research Datalink (CPRD) Aurum" by Wolf et al (International Journal of Epidemiology 2019). We were unable to find more recent distributions by ONS region of all CPRD Aurum patients.

For all COVID cases, coronavirus.data.gov.uk no longer publishes case counts by region at the day level. It was not possible to limit to the study period of August 1, 2020 – January 31, 2022, and therefore the results above reflect the figures as accessed on January 31, 2023 of the total number of cases since the start of the pandemic.

For the population of England, we used ONS 2021 Census figures.

ANDERSEN ET AL (2023)

PERSONS DIAGNOSED WITH COVID IN ENGLAND IN THE CPRD: A COHORT DESCRIPTION

**Supplemental file 1, Table 9: Characteristics of Primary Care COVID Cases in CPRD Aurum, by High Risk Definitions**

|                                      | All (n =<br>2,257,907) | Meeting NHS<br>Highest Risk<br>Conditions<br>(n = 249,972) | Meeting<br>PANORAMIC<br>Criteria<br>(n = 691,593) | Meeting<br>UKHSA<br>Clinical Risk<br>(n = 225,051) |
|--------------------------------------|------------------------|------------------------------------------------------------|---------------------------------------------------|----------------------------------------------------|
| Cases meeting definition             | --                     | 11%                                                        | 31%                                               | 10%                                                |
| Age, mean (SD)                       | 34 (19)                | 53 (18)                                                    | 55 (15)                                           | 49 (21)                                            |
| Sex                                  |                        |                                                            |                                                   |                                                    |
| Male                                 | 1,046,275 (46%)        | 37%                                                        | 45%                                               | 42%                                                |
| Female                               | 1,211,592 (54%)        | 63%                                                        | 55%                                               | 58%                                                |
| Unknown                              | 40 (< 1%)              | < 1%                                                       | < 1%                                              | < 1%                                               |
| General Practitioner Practice Region |                        |                                                            |                                                   |                                                    |
| North East                           | 83,834 (4%)            | 12,776 (5%)                                                | 29,115 (4%)                                       | 9,678 (4%)                                         |
| North West                           | 471,195 (21%)          | 60,632 (23%)                                               | 157,317 (23%)                                     | 53,930 (24%)                                       |
| Yorkshire and The<br>Humber          | 71,429 (3%)            | 8,563 (3%)                                                 | 23,079 (3%)                                       | 7,532 (3%)                                         |
| East Midlands                        | 49,651 (2%)            | 5,472 (2%)                                                 | 14,001 (2%)                                       | 4,678 (2%)                                         |
| West Midlands                        | 377,125 (17%)          | 43,550 (17%)                                               | 118,027 (17%)                                     | 38,817 (17%)                                       |
| East of England                      | 95,139 (4%)            | 10,394 (4%)                                                | 28,546 (4%)                                       | 7,824 (3%)                                         |
| London                               | 424,908 (19%)          | 45,690 (18%)                                               | 118,663 (17%)                                     | 40,268 (18%)                                       |
| South East                           | 448,536 (20%)          | 45,430 (17%)                                               | 130,283 (19%)                                     | 38,808 (17%)                                       |
| South West                           | 235,785 (10%)          | 27,437 (11%)                                               | 72,473 (10%)                                      | 23,480 (10%)                                       |
| Unknown                              | 305 (< 1%)             | 28 (< 1%)                                                  | 89 (< 1%)                                         | 36 (< 1%)                                          |
| Non-immunocompromised                | 2,193,241<br>(100%)    | 218,912<br>(100%)                                          | 648,474<br>(100%)                                 | 196,621<br>(100%)                                  |
| Unvaccinated                         | 1,170,509 (53%)        | 82,484 (38%)                                               | 236,106 (36%)                                     | 96,498 (49%)                                       |
| 1 COVID vaccine dose                 | 173,853 (8%)           | 9,527 (4%)                                                 | 28,711 (5%)                                       | 12,469 (6%)                                        |
| 2 COVID vaccine doses                | 598,367 (27%)          | 73,907 (34%)                                               | 234,570 (36%)                                     | 54,869 (28%)                                       |
| First booster                        | 250,512 (12%)          | 52,994 (24%)                                               | 149,087 (23%)                                     | 32,785 (17%)                                       |
| Immunocompromised                    | 64,666<br>(100%)       | 41,060<br>(100%)                                           | 43,119<br>(100%)                                  | 28,430<br>(100%)                                   |
| Unvaccinated                         | 1,306 (2%)             | 832 (2%)                                                   | 791 (2%)                                          | 675 (2%)                                           |
| 1 COVID vaccine dose                 | 6,033 (9%)             | 3,556 (9%)                                                 | 3,105 (7%)                                        | 2,661 (9%)                                         |
| 2 COVID vaccine doses                | 33,953 (53%)           | 20,928 (51%)                                               | 21,636 (50%)                                      | 14,416 (51%)                                       |
| 3 COVID vaccine doses                | 23,108 (36%)           | 15,544 (38%)                                               | 17,388 (40%)                                      | 10,542 (37%)                                       |
| First booster                        | 266 (< 1%)             | 200 (< 1%)                                                 | 199 (< 1%)                                        | 136 (< 1%)                                         |

SD: standard deviation. Where necessary, to fulfill CPRD suppression rules of cells with 10 or fewer persons, categories are presented as percentages to prevent back-calculation.

ANDERSEN ET AL (2023)

PERSONS DIAGNOSED WITH COVID IN ENGLAND IN THE CPRD: A COHORT DESCRIPTION

**Supplemental file 1, Table 10: Characteristics of Hospitalized COVID Cases in CPRD Aurum-HES Linked Data, by High Risk Definitions**

|                                       | All<br>(n = 13,165) | Meeting NHS<br>Highest Risk<br>Conditions<br>(n = 4,333) | Meeting<br>PANORAMIC<br>Criteria<br>(n = 11,011) | Meeting<br>UKHSA<br>Clinical Risk<br>(n = 5,353) |
|---------------------------------------|---------------------|----------------------------------------------------------|--------------------------------------------------|--------------------------------------------------|
| Hospitalized cases meeting definition | --                  | 33%                                                      | 84%                                              | 41%                                              |
| Age, mean (SD)                        | 60 (16)             | 66 (14)                                                  | 65 (14)                                          | 66 (16)                                          |
| Sex                                   |                     |                                                          |                                                  |                                                  |
| Male                                  | 7,537 (57%)         | 2,242 (52%)                                              | 6,280 (57%)                                      | 2,804 (52%)                                      |
| Female                                | 5,628 (43%)         | 2,091 (48%)                                              | 4,731 (43%)                                      | 2,549 (48%)                                      |
| Unknown                               | 0                   | 0                                                        | 0                                                | 0                                                |
| General Practitioner Practice Region  |                     |                                                          |                                                  |                                                  |
| North East                            | 467 (4%)            | 172 (4%)                                                 | 397 (4%)                                         | 200 (4%)                                         |
| North West                            | 2,886 (22%)         | 962 (22%)                                                | 2,510 (23%)                                      | 1,263 (24%)                                      |
| Yorkshire and The Humber              | 340 (3%)            | 126 (3%)                                                 | 282 (3%)                                         | 156 (3%)                                         |
| East Midlands                         | 214 (2%)            | 73 (2%)                                                  | 182 (2%)                                         | 97 (2%)                                          |
| West Midlands                         | 2,065 (16%)         | 708 (16%)                                                | 1,739 (16%)                                      | 891 (17%)                                        |
| East of England                       | 414 (3%)            | 147 (3%)                                                 | 358 (3%)                                         | 175 (3%)                                         |
| London                                | 2,984 (23%)         | 943 (22%)                                                | 2,387 (22%)                                      | 1,105 (21%)                                      |
| South East                            | 2,682 (20%)         | 832 (19%)                                                | 2,235 (20%)                                      | 1,022 (19%)                                      |
| South West                            | 1,113 (8%)          | 370 (9%)                                                 | 921 (8%)                                         | 444 (8%)                                         |
| Unknown                               | 0                   | 0                                                        | 0                                                | 0                                                |
| Non-immunocompromised                 | 12,984              | 4,179                                                    | 10,832                                           | 5,208                                            |
| Unvaccinated                          | 12,744 (98%)        | 4,107 (98%)                                              | 10,602 (98%)                                     | 5,070 (97%)                                      |
| 1 COVID vaccine dose                  | 240 (2%)            | 72 (2%)                                                  | 230 (2%)                                         | 138 (3%)                                         |
| 2 COVID vaccine doses                 | 0                   | 0                                                        | 0                                                | 0                                                |
| First booster                         | 0                   | 0                                                        | 0                                                | 0                                                |
| Immunocompromised                     | 181                 | 154                                                      | 179                                              | 145                                              |
| Unvaccinated                          | 102 (56%)           | 89 (58%)                                                 | 100 (56%)                                        | 79 (54%)                                         |
| 1 COVID vaccine dose                  | 79 (44%)            | 65 (42%)                                                 | 79 (44%)                                         | 66 (46%)                                         |
| 2 COVID vaccine doses                 | 0                   | 0                                                        | 0                                                | 0                                                |
| 3 COVID vaccine doses                 | 0                   | 0                                                        | 0                                                | 0                                                |
| First booster                         | 0                   | 0                                                        | 0                                                | 0                                                |

SD: standard deviation.

STROBE Statement—Checklist of items that should be included in reports of *cohort studies*

Andersen et al (2023): Persons Diagnosed with COVID in England in the Clinical Practice Research Datalink (CPRD): A Cohort Description

|                              | Item No | Recommendation                                                                                                                                                                                    | Page No  |
|------------------------------|---------|---------------------------------------------------------------------------------------------------------------------------------------------------------------------------------------------------|----------|
| <b>Title and abstract</b>    | 1       | (a) Indicate the study's design with a commonly used term in the title or the abstract                                                                                                            | 1        |
|                              |         | (b) Provide in the abstract an informative and balanced summary of what was done and what was found                                                                                               | 2-3      |
| <b>Introduction</b>          |         |                                                                                                                                                                                                   |          |
| Background/rationale         | 2       | Explain the scientific background and rationale for the investigation being reported                                                                                                              | 4        |
| Objectives                   | 3       | State specific objectives, including any prespecified hypotheses                                                                                                                                  | 4        |
| <b>Methods</b>               |         |                                                                                                                                                                                                   |          |
| Study design                 | 4       | Present key elements of study design early in the paper                                                                                                                                           | 5        |
| Setting                      | 5       | Describe the setting, locations, and relevant dates, including periods of recruitment, exposure, follow-up, and data collection                                                                   | 5        |
| Participants                 | 6       | (a) Give the eligibility criteria, and the sources and methods of selection of participants. Describe methods of follow-up                                                                        | 5        |
|                              |         | (b) For matched studies, give matching criteria and number of exposed and unexposed                                                                                                               | N/A      |
| Variables                    | 7       | Clearly define all outcomes, exposures, predictors, potential confounders, and effect modifiers. Give diagnostic criteria, if applicable                                                          | 6-9      |
| Data sources/<br>measurement | 8*      | For each variable of interest, give sources of data and details of methods of assessment (measurement). Describe comparability of assessment methods if there is more than one group              | 6-9      |
| Bias                         | 9       | Describe any efforts to address potential sources of bias                                                                                                                                         | 6-9      |
| Study size                   | 10      | Explain how the study size was arrived at                                                                                                                                                         | 5        |
| Quantitative variables       | 11      | Explain how quantitative variables were handled in the analyses. If applicable, describe which groupings were chosen and why                                                                      | 9        |
| Statistical methods          | 12      | (a) Describe all statistical methods, including those used to control for confounding                                                                                                             | 9        |
|                              |         | (b) Describe any methods used to examine subgroups and interactions                                                                                                                               | 9        |
|                              |         | (c) Explain how missing data were addressed                                                                                                                                                       | 7, 9     |
|                              |         | (d) If applicable, explain how loss to follow-up was addressed                                                                                                                                    | N/A      |
|                              |         | (e) Describe any sensitivity analyses                                                                                                                                                             | N/A      |
| <b>Results</b>               |         |                                                                                                                                                                                                   |          |
| Participants                 | 13*     | (a) Report numbers of individuals at each stage of study—eg numbers potentially eligible, examined for eligibility, confirmed eligible, included in the study, completing follow-up, and analysed | eTable 6 |
|                              |         | (b) Give reasons for non-participation at each stage                                                                                                                                              | eTable 6 |
|                              |         | (c) Consider use of a flow diagram                                                                                                                                                                | eTable 6 |
| Descriptive data             | 14*     | (a) Give characteristics of study participants (eg demographic, clinical, social) and information on exposures and potential confounders                                                          | 10-11    |

|    |                          |                                                                                                    |                                      |
|----|--------------------------|----------------------------------------------------------------------------------------------------|--------------------------------------|
| 1  |                          | (b) Indicate number of participants with missing data for each variable of                         | Shown<br>in<br>every<br>table<br>N/A |
| 2  |                          | interest                                                                                           |                                      |
| 3  |                          | (c) Summarise follow-up time (eg, average and total amount)                                        |                                      |
| 4  |                          |                                                                                                    |                                      |
| 5  | Outcome data             | 15* Report numbers of outcome events or summary measures over time                                 | 11                                   |
| 6  |                          |                                                                                                    |                                      |
| 7  |                          |                                                                                                    |                                      |
| 8  |                          |                                                                                                    |                                      |
| 9  |                          |                                                                                                    |                                      |
| 10 | Main results             | 16 (a) Give unadjusted estimates and, if applicable, confounder-adjusted estimates and their       | N/A<br><br>N/A<br>N/A                |
| 11 |                          | precision (eg, 95% confidence interval). Make clear which confounders were adjusted for            |                                      |
| 12 |                          | and why they were included                                                                         |                                      |
| 13 |                          | (b) Report category boundaries when continuous variables were categorized                          |                                      |
| 14 |                          | (c) If relevant, consider translating estimates of relative risk into absolute risk for a          |                                      |
| 15 |                          | meaningful time period                                                                             |                                      |
| 16 | Other analyses           | 17 Report other analyses done—eg analyses of subgroups and interactions, and sensitivity           | N/A                                  |
| 17 |                          | analyses                                                                                           |                                      |
| 18 |                          |                                                                                                    |                                      |
| 19 |                          |                                                                                                    |                                      |
| 20 |                          |                                                                                                    |                                      |
| 21 | <b>Discussion</b>        |                                                                                                    |                                      |
| 22 | Key results              | 18 Summarise key results with reference to study objectives                                        | 12-13                                |
| 23 |                          |                                                                                                    |                                      |
| 24 | Limitations              | 19 Discuss limitations of the study, taking into account sources of potential bias or imprecision. | 14-15                                |
| 25 |                          | Discuss both direction and magnitude of any potential bias                                         |                                      |
| 26 | Interpretation           | 20 Give a cautious overall interpretation of results considering objectives, limitations,          | 15-16                                |
| 27 |                          | multiplicity of analyses, results from similar studies, and other relevant evidence                |                                      |
| 28 | Generalisability         | 21 Discuss the generalisability (external validity) of the study results                           | 12-13                                |
| 29 |                          |                                                                                                    |                                      |
| 30 |                          |                                                                                                    |                                      |
| 31 | <b>Other information</b> |                                                                                                    |                                      |
| 32 | Funding                  | 22 Give the source of funding and the role of the funders for the present study and, if            | 18                                   |
| 33 |                          | applicable, for the original study on which the present article is based                           |                                      |
| 34 |                          |                                                                                                    |                                      |

\*Give information separately for exposed and unexposed groups.

**Note:** An Explanation and Elaboration article discusses each checklist item and gives methodological background and published examples of transparent reporting. The STROBE checklist is best used in conjunction with this article (freely available on the Web sites of PLoS Medicine at <http://www.plosmedicine.org/>, Annals of Internal Medicine at <http://www.annals.org/>, and Epidemiology at <http://www.epidem.com/>). Information on the STROBE Initiative is available at <http://www.strobe-statement.org>.
