# Supplementary material for: Persons diagnosed with COVID-19 in England in the Clinical Practice Research Datalink (CPRD): a cohort description
Source: PubMed Central journal article supplement — BMJ Open. 2024 Jan 12;14(1):e073866. doi: 10.1136/bmjopen-2023-073866 (PMC10806788; doi:10.1136/bmjopen-2023-073866), 2024-01-12
Supplement: bmjopen-2023-073866supp001.pdf [file bmjopen-2023-073866supp001.pdf]

ANDERSEN ET AL (2023)  
PERSONS DIAGNOSED WITH COVID IN ENGLAND IN THE CPRD: A COHORT DESCRIPTION

## Table of Contents

|                                                                                                                                                                                       |    |
|---------------------------------------------------------------------------------------------------------------------------------------------------------------------------------------|----|
| Supplemental file 1, Table 1: COVID Cohort Definition.....                                                                                                                            | 2  |
| Supplemental file 1, Table 2: COVID Vaccination Definition .....                                                                                                                      | 4  |
| Supplemental file 1, Table 3: Search Terms for NHS Highest Risk Definition.....                                                                                                       | 6  |
| Supplemental file 1, Table 4: Search Terms for PANORAMIC Eligibility Criteria Definition .....                                                                                        | 13 |
| Supplemental file 1, Table 5: Search Terms for UK Health Security Agency Clinical Risk Group Definition .....                                                                         | 19 |
| Supplemental file 1, Table 6: Cohort Attrition .....                                                                                                                                  | 27 |
| Supplemental file 1, Figure 1: Date of Diagnosis for 2,271,072 COVID Cases in CPRD Aurum, By Care Setting, August 1, 2020 through January 31, 2022 .....                              | 28 |
| Supplemental file 1, Figure 2: Date of Diagnosis for 2,257,907 Primary Care COVID Cases in CPRD Aurum, August 1, 2020 through January 31, 2022 .....                                  | 29 |
| Supplemental file 1, Figure 3: Date of Primary Care Recorded Diagnosis in CPRD Aurum-HES Linked Data for 13,165 Hospitalised COVID Cases, August 1, 2020 through March 31, 2021 ..... | 30 |
| Supplemental file 1, Table 7: Reference National Case Counts and Census Distributions for England.....                                                                                | 31 |
| Supplemental file 1, Table 8: Regional Distribution of CPRD COVID cohorts, CPRD Practices, COVID Cases and Population of England .....                                                | 33 |
| Supplemental file 1, Table 9: Characteristics of Primary Care COVID Cases in CPRD Aurum, by High Risk Definitions .....                                                               | 34 |
| Supplemental file 1, Table 10: Characteristics of Hospitalized COVID Cases in CPRD Aurum-HES Linked Data, by High Risk Definitions .....                                              | 35 |

ANDERSEN ET AL (2023)  
 PERSONS DIAGNOSED WITH COVID IN ENGLAND IN THE CPRD: A COHORT DESCRIPTION

**Supplemental file 1, Table 1: COVID Cohort Definition**

| Medcode           | Term                                                                                                                                |
|-------------------|-------------------------------------------------------------------------------------------------------------------------------------|
| 6874141000006113  | SARS-CoV                                                                                                                            |
| 6604671000006111  | SARS-CoV infection                                                                                                                  |
| 13053051000006117 | 2019-nCoV (novel coronavirus) antigen detection result positive                                                                     |
| 12990741000006116 | 2019-nCoV (novel coronavirus) detected                                                                                              |
| 13483601000006110 | 2019-nCoV (novel coronavirus) detection result positive at the limit of detection                                                   |
| 13483161000006118 | 2019-nCoV (novel coronavirus) ribonucleic acid detected                                                                             |
| 14168601000006119 | Acute COVID-19                                                                                                                      |
| 13486461000006118 | Acute COVID-19 infection                                                                                                            |
| 14168611000006116 | Acute disease caused by Severe acute respiratory syndrome coronavirus 2                                                             |
| 13486471000006113 | Acute disease caused by severe acute respiratory syndrome coronavirus 2 infection                                                   |
| 13486571000006112 | Asymptomatic COVID-19                                                                                                               |
| 13486561000006117 | Asymptomatic SARS-CoV-2 (severe acute respiratory syndrome coronavirus 2) infection                                                 |
| 12802201000006117 | Confirmed 2019-nCoV (novel coronavirus) infection                                                                                   |
| 13012431000006117 | COVID-19                                                                                                                            |
| 13483031000006114 | COVID-19                                                                                                                            |
| 13012441000006110 | COVID-19 caused by SARS-CoV-2 (severe acute respiratory syndrome coronavirus 2)                                                     |
| 13002281000006117 | COVID-19 confirmed by laboratory test                                                                                               |
| 13002311000006115 | COVID-19 confirmed clinically                                                                                                       |
| 13002291000006119 | COVID-19 confirmed using clinical diagnostic criteria                                                                               |
| 13483951000006118 | COVID-19 detected                                                                                                                   |
| 12990531000006116 | Detection of 2019-nCoV (novel coronavirus) using polymerase chain reaction technique                                                |
| 13485771000006110 | Detection of COVID-19                                                                                                               |
| 13485471000006115 | Detection of ribonucleic acid of 2019 novel coronavirus in nasopharyngeal swab                                                      |
| 13485711000006118 | Detection of ribonucleic acid of COVID-19 using polymerase chain reaction                                                           |
| 13485421000006116 | Detection of ribonucleic acid of Severe acute respiratory syndrome coronavirus 2                                                    |
| 13485461000006110 | Detection of RNA (ribonucleic acid) of SARS-CoV-2 (severe acute respiratory syndrome coronavirus 2) in nasopharyngeal swab          |
| 13485521000006117 | Detection of RNA (ribonucleic acid) of SARS-CoV-2 (severe acute respiratory syndrome coronavirus 2) in oropharyngeal swab           |
| 13485581000006118 | Detection of RNA (ribonucleic acid) of SARS-CoV-2 (severe acute respiratory syndrome coronavirus 2) in sputum                       |
| 13485701000006116 | Detection of RNA (ribonucleic acid) of SARS-CoV-2 (severe acute respiratory syndrome coronavirus 2) using polymerase chain reaction |
| 13485751000006117 | Detection of SARS-CoV-2 (severe acute respiratory syndrome coronavirus 2)                                                           |
| 13485381000006114 | Detection of SARS-CoV-2 (severe acute respiratory syndrome coronavirus 2) antigen                                                   |
| 13012231000006116 | Detection of SARS-CoV-2 (severe acute respiratory syndrome coronavirus 2) using polymerase chain reaction technique                 |

ANDERSEN ET AL (2023)

## PERSONS DIAGNOSED WITH COVID IN ENGLAND IN THE CPRD: A COHORT DESCRIPTION

---

|                   |                                                                                                                                         |
|-------------------|-----------------------------------------------------------------------------------------------------------------------------------------|
| 13483041000006116 | Disease caused by 2019 novel coronavirus                                                                                                |
| 13483051000006119 | Disease caused by 2019-nCoV                                                                                                             |
| 12991131000006119 | Disease caused by 2019-nCoV (novel coronavirus)                                                                                         |
| 13483061000006117 | Disease caused by Severe acute respiratory syndrome coronavirus 2                                                                       |
| 12991141000006112 | Disease caused by Wuhan 2019-nCoV (novel coronavirus)                                                                                   |
| 13053041000006119 | SARS-CoV-2 (severe acute respiratory syndrome coronavirus 2) antigen detection result positive                                          |
| 13012301000006116 | SARS-CoV-2 (severe acute respiratory syndrome coronavirus 2) detected                                                                   |
| 13052351000006112 | SARS-CoV-2 (severe acute respiratory syndrome coronavirus 2) RNA (ribonucleic acid) detection result positive                           |
| 13483141000006117 | SARS-CoV-2 (severe acute respiratory syndrome coronavirus 2) RNA (ribonucleic acid) detection result positive                           |
| 13483591000006119 | SARS-CoV-2 (severe acute respiratory syndrome coronavirus 2) RNA (ribonucleic acid) detection result positive at the limit of detection |
| 13483151000006115 | Severe acute respiratory syndrome coronavirus 2 ribonucleic acid detected                                                               |
| 12990751000006119 | Wuhan 2019-nCoV (novel coronavirus) detected                                                                                            |
| 13002301000006118 | Probable COVID-19 confirmed using clinical diagnostic criteria                                                                          |
| 13483611000006113 | SARS (severe acute respiratory syndrome) coronavirus 2 RNA                                                                              |
| 13484481000006118 | SARS-CoV-2 - severe acute respiratory syndrome coronavirus 2                                                                            |
| 13039281000006117 | SARS-CoV-2 (severe acute respiratory syndrome coronavirus 2) detection result positive                                                  |
| 13052381000006116 | SARS-CoV-2 (severe acute respiratory syndrome coronavirus 2) RNA (ribonucleic acid) qualitative existence in specimen                   |
| 13483941000006115 | Severe acute respiratory syndrome coronavirus 2 detected                                                                                |

---

Note: "SARS-CoV" or "SARS-CoV infection" may refer to the SARS illness of 2003. We allowed these terms, given the novelty of SARS-CoV-2 and potential for erroneous use of SARS-CoV terms, but required them to be used during the time period of COVID (August 2020 onwards).

ANDERSEN ET AL (2023)  
 PERSONS DIAGNOSED WITH COVID IN ENGLAND IN THE CPRD: A COHORT DESCRIPTION

**Supplemental file 1, Table 2: COVID Vaccination Definition**

| <b>Product code</b> | <b>Term</b>                                                                                                                                                      |
|---------------------|------------------------------------------------------------------------------------------------------------------------------------------------------------------|
| 13739441000033113   | COVID-19 Vaccine AstraZeneca (ChAdOx1 S [recombinant]) 5x10,000,000,000 viral particles/0.5ml dose suspension for injection multidose vials (AstraZeneca UK Ltd) |
| 13750541000033115   | COVID-19 Vaccine Janssen (Ad26.COVS-S [recombinant]) 0.5ml dose suspension for injection multidose vials (Janssen-Cilag Ltd)                                     |
| 13860541000033111   | COVID-19 Vaccine Medicago (CoVLP) 3.75micrograms/0.5ml dose emulsion for injection multidose vials (Medicago Inc)                                                |
| 13790341000033117   | COVID-19 Vaccine Novavax (adjuvanted) 5micrograms/0.5ml dose suspension for injection multidose vials (Baxter Oncology GmbH)                                     |
| 13778941000033110   | COVID-19 Vaccine Valneva (inactivated adjuvanted whole virus) 40antigen units/0.5ml dose suspension for injection multidose vials (Valneva UK Ltd)               |
| 13739541000033114   | Comirnaty COVID-19 mRNA Vaccine 30micrograms/0.3ml dose concentrate for dispersion for injection multidose vials (Pfizer Ltd)                                    |
| 13764941000033111   | Spikevax COVID-19 mRNA (nucleoside modified) Vaccine 0.1mg/0.5ml dose dispersion for injection multidose vials (Moderna, Inc)                                    |
| <b>Medical code</b> | <b>Term</b>                                                                                                                                                      |
| 12990501000006112   | 2019-nCoV (novel coronavirus) vaccination                                                                                                                        |
| 13012221000006119   | SARS-CoV-2 (severe acute respiratory syndrome coronavirus 2) vaccination                                                                                         |
| 13482981000006117   | SARS-CoV-2 (severe acute respiratory syndrome coronavirus 2) vaccination                                                                                         |
| 13482991000006119   | 2019 novel coronavirus vaccination                                                                                                                               |
| 13483001000006118   | Severe acute respiratory syndrome coronavirus 2 vaccination                                                                                                      |
| 13483011000006115   | COVID-19 vaccination                                                                                                                                             |
| 13483021000006111   | 2019-nCoV (novel coronavirus) vaccination                                                                                                                        |
| 13483211000006110   | Immunisation course to achieve immunity against SARS-CoV-2 (severe acute respiratory syndrome coronavirus 2)                                                     |
| 13483221000006119   | Immunisation course to achieve immunity against 2019-nCoV (novel coronavirus)                                                                                    |
| 13483231000006116   | Administration of first dose of SARS- CoV-2 (severe acute respiratory syndrome coronavirus 2) vaccine                                                            |
| 13483241000006114   | Administration of first dose of 2019- nCoV (novel coronavirus) vaccine                                                                                           |
| 13483251000006111   | Administration of second dose of SARS- CoV-2 (severe acute respiratory syndrome coronavirus 2) vaccine                                                           |
| 13483261000006113   | Administration of second dose of 2019- nCoV (novel coronavirus) vaccine                                                                                          |
| 13483531000006118   | SARS-CoV-2 (severe acute respiratory syndrome coronavirus 2) immunisation course started                                                                         |
| 13483541000006111   | 2019-nCoV (novel coronavirus) immunisation course started                                                                                                        |
| 14169101000006118   | COVID-19 mRNA vaccine                                                                                                                                            |
| 14170191000006111   | SARS-CoV-2 antigen vaccine or SARS- CoV-2 mRNA vaccine                                                                                                           |
| 14170301000006118   | Administration of first dose of SARS- CoV-2 mRNA vaccine                                                                                                         |
| 14170341000006116   | First COVID-19 mRNA vaccination                                                                                                                                  |
| 14170411000006113   | Administration of second dose of SARS- CoV-2 mRNA vaccine                                                                                                        |
| 14170431000006119   | Second COVID-19 mRNA vaccination                                                                                                                                 |

ANDERSEN ET AL (2023)

## PERSONS DIAGNOSED WITH COVID IN ENGLAND IN THE CPRD: A COHORT DESCRIPTION

---

|                   |                                                                                                                |
|-------------------|----------------------------------------------------------------------------------------------------------------|
| 14233631000006113 | Immunisation course to maintain protection against SARS-CoV-2 (severe acute respiratory syndrome coronavirus 2 |
| 14233641000006115 | Booster course to maintain protection against SARS-CoV-2 (severe acute respiratory syndrome coronavirus 2)     |
| 14233671000006111 | SARS-CoV-2 (severe acute respiratory syndrome coronavirus 2) immunisation course completed                     |
| 14233841000006119 | SARS-CoV-2 (severe acute respiratory syndrome coronavirus 2) protection maintenance course started             |
| 14233871000006110 | SARS-CoV-2 (severe acute respiratory syndrome coronavirus 2) protection maintenance course completed           |
| 14233881000006113 | Severe acute respiratory syndrome coronavirus 2 protection maintenance course done                             |
| 14283421000006117 | Administration of fourth dose of SARS- CoV-2 (severe acute respiratory syndrome coronavirus 2) vaccine         |
| 14283481000006118 | Administration of fifth dose of SARS- CoV-2 (severe acute respiratory syndrome coronavirus 2) vaccine          |
| 14283541000006113 | Administration of third dose of SARS- CoV-2 (severe acute respiratory syndrome coronavirus 2) vaccine          |

---

ANDERSEN ET AL (2023)

PERSONS DIAGNOSED WITH COVID IN ENGLAND IN THE CPRD: A COHORT DESCRIPTION

**Supplemental file 1, Table 3: Search Terms for NHS Highest Risk Definition**

Note: this list reflects the report “Defining the highest-risk clinical subgroups upon community infection with SARS-CoV-2 when considering the use of neutralising monoclonal antibodies (nMABs) and antiviral drugs: independent advisory group report” version published on May 30, 2022.

| <b>Classification as defined by England's Deputy Chief Medical Officer</b> | <b>Concept as operationalized by Andersen et al</b>                                                                                                                                                                                                            | <b>Search term</b>                                                                                                                                                                                                                                                                                                                                                                                    |
|----------------------------------------------------------------------------|----------------------------------------------------------------------------------------------------------------------------------------------------------------------------------------------------------------------------------------------------------------|-------------------------------------------------------------------------------------------------------------------------------------------------------------------------------------------------------------------------------------------------------------------------------------------------------------------------------------------------------------------------------------------------------|
| Down's syndrome and other genetic disorders                                | Down's syndrome or other chromosomal disorder known to affect immune competence                                                                                                                                                                                | *down*<br>*trisom*<br>*mongol*                                                                                                                                                                                                                                                                                                                                                                        |
| Solid cancer                                                               | We identified a code list “Clinical codelist – Cancer”, which did not separate solid from liquid (blood) cancers. We systematically excluded blood cancers from the list by excluding the following terms, and had the resulting list reviewed by a clinician: | leuk<br>Lymphoma<br>lymphatic<br>Lymphoid<br>lymphosarc<br>myeloma<br>myeloid<br>myeloscler<br>myelofib<br>myelosis<br>myeloprol<br>myelody<br>walden<br>anem<br>anaem<br>raeb<br>nodular scler<br>mycosis<br>sezary<br>zary<br>hodgk<br>heavy<br>plasma<br>marrow<br>haemato<br>hemota<br>erythraem<br>erythrem<br>heilmeyer<br>lymphadenopathy<br>polycyt<br>erythrocyt<br>erythrodys<br>thrombocyt |

ANDERSEN ET AL (2023)

PERSONS DIAGNOSED WITH COVID IN ENGLAND IN THE CPRD: A COHORT DESCRIPTION

---

|                                                                                |                                                       |                                                                                                                                                                                                     |
|--------------------------------------------------------------------------------|-------------------------------------------------------|-----------------------------------------------------------------------------------------------------------------------------------------------------------------------------------------------------|
|                                                                                |                                                       | franklin<br>immunoprolif<br>reticulosarc<br>chloroma<br>macroglob<br>reticulosis<br>kahler<br>burkitt<br>di guglielmo<br>langer<br>histiocytosis<br>germinoblast<br>letterer<br>FAB<br>Mastocytosis |
| Haematological diseases and recipients of haematological stem cell transplants | Amyloidosis<br>Graft Versus Host disease              | *amyloid*<br>*GVHD*<br>*Graft V*<br>*Graft-V*<br>*reject*<br>*trans*<br>*fail* *trans*                                                                                                              |
|                                                                                | Myelodysplastic syndrome                              | *MDS*<br>*myelod*<br>*preleuk*                                                                                                                                                                      |
|                                                                                | Chronic myelomonocytic leukaemia                      | *smouldering leuk*<br>*CMML*                                                                                                                                                                        |
|                                                                                | Sickle cell disease                                   | *chronic myelom*<br>*sickl*<br>*SCD*                                                                                                                                                                |
|                                                                                | Myeloma                                               | *myelom*<br>*kahler*                                                                                                                                                                                |
|                                                                                | Myelofibrosis                                         | *myelof*<br>*PMF*<br>*idiopath* *fibrosis*<br>*myelod metaplasia*                                                                                                                                   |
|                                                                                | Rare inherited anemia                                 | *anaem*<br>*anem*                                                                                                                                                                                   |
|                                                                                | Chronic lymphocytic leukaemia and Follicular lymphoma | *lymphoma*<br>*NHL*<br>* hodgk*<br>*nodular scler*<br>*mycosis fung*<br>*sezary*<br>*walden*                                                                                                        |
|                                                                                | Thalassaemia                                          | *thalass*<br>*cooley*<br>*mediterr*<br>*constant spring*<br>*haemoglobin h*                                                                                                                         |

---

ANDERSEN ET AL (2023)

PERSONS DIAGNOSED WITH COVID IN ENGLAND IN THE CPRD: A COHORT DESCRIPTION

|                                                          |                                                                                                                                                                                                                                                                                                                                                  |                                                                                                                                                                                                                                                                                                                                                                                                   |
|----------------------------------------------------------|--------------------------------------------------------------------------------------------------------------------------------------------------------------------------------------------------------------------------------------------------------------------------------------------------------------------------------------------------|---------------------------------------------------------------------------------------------------------------------------------------------------------------------------------------------------------------------------------------------------------------------------------------------------------------------------------------------------------------------------------------------------|
|                                                          |                                                                                                                                                                                                                                                                                                                                                  | *hemoglobin h*<br>*hb h*<br>*haemoglobin bart*<br>*hemoglobin bart*<br>*hb bart*                                                                                                                                                                                                                                                                                                                  |
|                                                          | Systemic anti-cancer treatments:<br>Davidson, J, Warren-Gash, C and Mcdonald, H (2021). Clinical codelist - CPRD Aurum - Immunosuppressive conditions. [Data Collection]. London School of Hygiene & Tropical Medicine, London, United Kingdom.<br><a href="https://doi.org/10.17037/DATA.00002234">https://doi.org/10.17037/DATA.00002234</a> . |                                                                                                                                                                                                                                                                                                                                                                                                   |
| Renal disease                                            | Davidson, J, Warren-Gash, C, Mcdonald, H, Evans, D and Clay, S (2021). Clinical codelist - chronic kidney disease. [Data Collection]. London School of Hygiene & Tropical Medicine, London, United Kingdom.<br><a href="https://doi.org/10.17037/DATA.00002406">https://doi.org/10.17037/DATA.00002406</a> .<br>CKD, stage 4 or 5                | *CKD*<br>*renal* *disease*<br>*renal* *failure*<br>*renal* *insufficiency*<br>*renal* *disorder*<br>*kidney* *disease*<br>*kidney* *disorder*<br>*kidney* *failure*<br>*eGFR*<br>*estimated*<br>*glomerular*<br>*filtration* *rate*<br>*disease* *renal*<br>*failure* *renal*<br>*insufficiency* *renal*<br>*disorder* *renal*<br>*disease* *kidney*<br>*disorder* *kidney*<br>*failure* *kidney* |
| Liver disease<br>Solid organ<br>transplant<br>recipients | Cirrhosis<br>Solid organ transplant                                                                                                                                                                                                                                                                                                              | *cirrhos*<br>*transplant*<br>*organ* *recipient*<br>*heart* *recipient*<br>*lung* *recipient*<br>*pancreas*<br>*recipient*<br>*kidney* *recipient*<br>*intestine* *recipient*<br>*gland* *recipient*<br>*stomach* *recipient*<br>*spleen* *recipient*<br>*liver* *recipient*<br>*bladder* *recipient*                                                                                             |
| Immune-mediated                                          | People who have received a B-cell depleting therapy in the last 12 months                                                                                                                                                                                                                                                                        | Obinutuzumab<br>Ocrelizumab                                                                                                                                                                                                                                                                                                                                                                       |



ANDERSEN ET AL (2023)

## PERSONS DIAGNOSED WITH COVID IN ENGLAND IN THE CPRD: A COHORT DESCRIPTION

|                        |                                                                                                                                                                               |                                                                                                                                                                                                                                          |
|------------------------|-------------------------------------------------------------------------------------------------------------------------------------------------------------------------------|------------------------------------------------------------------------------------------------------------------------------------------------------------------------------------------------------------------------------------------|
| inflammatory disorders |                                                                                                                                                                               | Ofatumumab<br>Rituximab<br>Cyclophosphamide                                                                                                                                                                                              |
|                        | People who have been treated with cyclophosphamide (IV or oral) in the 6 months prior                                                                                         |                                                                                                                                                                                                                                          |
|                        | People who are on biologics or small molecule JAK-inhibitors (except anti-CD20 depleting monoclonal antibodies) or who have received these therapies within the last 6 months | Abatacept<br>Adalimumab<br>Baracitinib<br>Belimumab<br>Certolizumab pegol<br>Etanercept<br>Golimumab<br>Infliximab<br>Ixekizumab<br>Sarilumab<br>Secukinumab<br>Tocilizumab<br>Tofacitinib<br>Upadacitinib<br>Ustekinumab<br>Vedolizumab |
|                        | People who are on corticosteroids (equivalent to greater than 10mg per day of prednisolone) for at least the 28 days prior                                                    | Betamethasone<br>Cortisone<br>Dexamethasone<br>Hydrocortisone<br>Methylprednisolone<br>Prednisolone<br>Prednisone<br>Triamcinolone                                                                                                       |
|                        | People who are on current treatment with: methotrexate (for interstitial lung disease) and/or ciclosporin                                                                     | Mycophenolate<br>Tacrolimus, oral<br>Azathioprine with mercaptopurine<br>Methotrexate<br>Ciclosporin                                                                                                                                     |
|                        | Giant cell arteritis                                                                                                                                                          | *giant cell arterit*                                                                                                                                                                                                                     |
|                        | Sarcoidosis                                                                                                                                                                   | *sarcoid*                                                                                                                                                                                                                                |
|                        |                                                                                                                                                                               | *Besnier*                                                                                                                                                                                                                                |
|                        | Psoriatic arthritis or psoriasis                                                                                                                                              | *arthr*                                                                                                                                                                                                                                  |
|                        |                                                                                                                                                                               | *psoria*                                                                                                                                                                                                                                 |
|                        | Autoimmune hepatitis                                                                                                                                                          | *autoimmune hep*                                                                                                                                                                                                                         |
|                        |                                                                                                                                                                               | *hepatitis auto*                                                                                                                                                                                                                         |
|                        |                                                                                                                                                                               | *AIH*                                                                                                                                                                                                                                    |
|                        |                                                                                                                                                                               | *lupoid hep*                                                                                                                                                                                                                             |
|                        |                                                                                                                                                                               | *autoimmune chron*                                                                                                                                                                                                                       |
|                        |                                                                                                                                                                               | *autoimmune act*                                                                                                                                                                                                                         |
|                        |                                                                                                                                                                               | *autoimmune agg*                                                                                                                                                                                                                         |
|                        | Crohn's disease                                                                                                                                                               | *crohn*                                                                                                                                                                                                                                  |
|                        |                                                                                                                                                                               | *regional ent*                                                                                                                                                                                                                           |
|                        |                                                                                                                                                                               | *granulomatous ent*                                                                                                                                                                                                                      |
|                        |                                                                                                                                                                               | *ileocoli*                                                                                                                                                                                                                               |
|                        |                                                                                                                                                                               | *Jejunoileitis*                                                                                                                                                                                                                          |

ANDERSEN ET AL (2023)  
 PERSONS DIAGNOSED WITH COVID IN ENGLAND IN THE CPRD: A COHORT DESCRIPTION

|                                             |                                                                                                                                                                                                                                                                                                         |
|---------------------------------------------|---------------------------------------------------------------------------------------------------------------------------------------------------------------------------------------------------------------------------------------------------------------------------------------------------------|
| Type I diabetes                             | *granulomatous col*<br>*type 1 dia*<br>*type I dia*<br>*diabetes mellitus<br>juv*<br>*diabetes mellitus<br>*insulin dep*<br>*juvenile onset dia*<br>*juvenile-onset dia*<br>*juvenile-onset<br>*diabetes mellitus<br>type 1*<br>*diabetes mellitus<br>type I*<br>*diabetes type 1*<br>*diabetes type I* |
| Ankylosing spondylitis                      | *ankylosing*<br>*Bekhterev*<br>*Rheumatoid arthritis<br>of spine*<br>*spine rheum*<br>*rheumatoid arthritis<br>of*<br>*rheumatoid* *spine*                                                                                                                                                              |
| Rheumatoid arthritis                        | *rheumatoid*<br>*felty*<br>*caplan*<br>*rheum.*<br>*atrophic art*<br>*chronic rheumatic<br>art*<br>*prolif* *art*                                                                                                                                                                                       |
| Systemic lupus erythematosus<br>Scleroderma | *lupus*<br>*scleroderma*<br>*systemic sclero*<br>*crest s*<br>*morphea*<br>*morphoea*                                                                                                                                                                                                                   |
| Ulcerative colitis                          | *ulcerative* *colitis*<br>*ulcerative* *proctitis*<br>*rectosigmoiditis*<br>*inflam* *polyps*<br>*left* *colitis*<br>*ulcerative* *panc*<br>*extensive* *colitis*<br>*proctosigmoiditis*<br>*backwash* *ileitis*<br>*distal* *colitis*<br>*inflam* *bowel*                                              |
| Immunodeficiencies                          | *cvid*                                                                                                                                                                                                                                                                                                  |

ANDERSEN ET AL (2023)

PERSONS DIAGNOSED WITH COVID IN ENGLAND IN THE CPRD: A COHORT DESCRIPTION

|                                                                               |                                                                             |                                                                                                                                                                                                                                                                                                                                                                                                      |
|-------------------------------------------------------------------------------|-----------------------------------------------------------------------------|------------------------------------------------------------------------------------------------------------------------------------------------------------------------------------------------------------------------------------------------------------------------------------------------------------------------------------------------------------------------------------------------------|
| Immune deficiencies                                                           |                                                                             | *common*<br>*immunodeficienc*<br>*antibody* *deficienc*<br>Hyper* *igm*<br>*higm*<br>*good* *syndrom*<br>*thymom* *deficienc*<br>*severe* *combin*<br>*immunodeficienc*<br>*SCID*<br>*aps-1*<br>*pas-2*<br>* polygland*<br>*autoimmune*<br>*autoimmune*<br>*polygland*<br>*polyendocrinopath*<br>*ectodermal dystroph*<br>*apeced*<br>*ifn* *signal*<br>*interferon* *signal*<br>*gammaglobulinaemi* |
| HIV/AIDS                                                                      | HIV                                                                         | *HIV*<br>*immunodeficiency vir*                                                                                                                                                                                                                                                                                                                                                                      |
| Rare neurological and severe complex life-limiting neurodisability conditions | Multiple sclerosis<br><br>Motor neurone disease<br><br>Huntington's disease | *Multiple sclerosis*<br>*sclerosis multiple*<br>*encephalomyelit*<br>*disseminat*<br>* ms*<br>*motor* *neurone*<br>disease*<br>*kennedy*<br>*amyotrophic*<br>*lateral **sclerosis*<br>*ALS*<br>*primary* *lateral*<br>*sclerosis*<br>*progressive*<br>*bulbar* *palsy*<br>*progressive*<br>*spinal* muscular*<br>*atrophy*<br>*huntington*<br>*huntington*<br>*disease*<br>*Huntington*<br>*chorea*  |

ANDERSEN ET AL (2023)  
PERSONS DIAGNOSED WITH COVID IN ENGLAND IN THE CPRD: A COHORT DESCRIPTION

---

Myasthenia gravis

\*myasthenia\* \*gravis\*

---

ANDERSEN ET AL (2023)

PERSONS DIAGNOSED WITH COVID IN ENGLAND IN THE CPRD: A COHORT DESCRIPTION

**Supplemental file 1, Table 4: Search Terms for PANORAMIC Eligibility Criteria Definition**

| Inclusion criteria as in PANORAMIC protocol                                                                                                                                              | Concept as operationalized by Andersen et al                                                                                                                                                                                                                                                                                                                                                                                                                                                                                                                                                                                                                                                                    | Search term                                                                                                                                                                                                                                                                                                                                                                                                                                                                                                                                                                                                                                                                                                                                                                                                                                                                                                                                                      |
|------------------------------------------------------------------------------------------------------------------------------------------------------------------------------------------|-----------------------------------------------------------------------------------------------------------------------------------------------------------------------------------------------------------------------------------------------------------------------------------------------------------------------------------------------------------------------------------------------------------------------------------------------------------------------------------------------------------------------------------------------------------------------------------------------------------------------------------------------------------------------------------------------------------------|------------------------------------------------------------------------------------------------------------------------------------------------------------------------------------------------------------------------------------------------------------------------------------------------------------------------------------------------------------------------------------------------------------------------------------------------------------------------------------------------------------------------------------------------------------------------------------------------------------------------------------------------------------------------------------------------------------------------------------------------------------------------------------------------------------------------------------------------------------------------------------------------------------------------------------------------------------------|
| Chronic respiratory disease (including chronic obstructive pulmonary disease (COPD), cystic fibrosis and asthma requiring at least daily use of preventative and/or reliever medication) | Davidson, J, Warren-Gash, C and McDonald, H (2021). Clinical codelist - CPRD Aurum - chronic respiratory disease. [Data Collection]. London School of Hygiene & Tropical Medicine, London, United Kingdom.<br><a href="https://doi.org/10.17037/DATA.00002214">https://doi.org/10.17037/DATA.00002214</a> .<br><br>We also included product codes for asthma medications, using all drugs classified by the British National Formulary under the following categories:<br>Short-acting beta agonists (SABA)<br>Short-acting muscarinic antagonists (SAMA)<br>Inhaled corticosteroids (ICS)<br>Long-acting beta agonists (LABA)<br>Long-acting muscarinic antagonist (LAMA)<br>Methylxanthine<br>PDE-4 inhibitor |                                                                                                                                                                                                                                                                                                                                                                                                                                                                                                                                                                                                                                                                                                                                                                                                                                                                                                                                                                  |
| Chronic heart or vascular disease                                                                                                                                                        | Atherosclerosis/Arteriosclerosis<br>Stenosis<br><br>Cerebrovascular disease (not including stroke/TIA - included in PANORAMIC)<br>Pulmonary embolism<br>Systolic/diastolic dysfunction<br>Chronic arrhythmias<br>Myocardial infarction<br>Hypertension<br><br>Venous thromboembolism/DVT<br><br>Heart failure<br>Atrial fibrillation<br>Ischaemic and peripheral heart disease<br><br>Congenital heart/cardiac disease<br>Various                                                                                                                                                                                                                                                                               | *athero*; *arterioscl*; *ASVD*; *obliter*; *endart*<br>*steno* *aort*; *steno* *vasc*; *steno*<br>*heart*; *steno* *card*; *strict* *aort*; *strict*<br>*vasc*; *heart* *stict*; *card* *strict*;<br>*cerebro* *disea*; *subarac* *haem*; *vasc*<br>*demen*; *arterio* *demen*; *infar* *demen*<br><br>*pul* *embo*;<br>*syst* *dys*; *dia* *dys*; *dys* *syst*<br>*AFL*; *atria* *flut*; *arrhyth*; *dysrhy*<br>*myo* *infarc*; *heart* *att*; *AMI*<br>*hyperten*; *high* *blood**pres*;<br>*bp*; *bp*; *bp* *HBP*; *HTN*<br>*VTE*; *thrombo*; *DVT*; *blood* *clot*; *pulmon*<br>*embolis*; *pe* *pe*; *pe*;<br>*CCF*; *CHF*; *hear* *fail*; *card* *fail*;<br>*fibrilla*; *fibrilla*; *af* *af*; *Afib*<br>*hear* *diseas*;<br>*artero* *diseas*;<br>*vasc* *diseas*;<br>*CAD*;<br>*ihd*;<br>*myocard* *isch*;<br>*chd*<br><br>*congen* *hear*; *congen* *card*; *CHD*<br>*Aneurysm*<br>*May-Thurner*<br>*Thoracic* *outlet*<br>*Fibromuscular*<br>*Klippel* |

ANDERSEN ET AL (2023)

PERSONS DIAGNOSED WITH COVID IN ENGLAND IN THE CPRD: A COHORT DESCRIPTION

---

|                                                                                                       |                                   |                                              |
|-------------------------------------------------------------------------------------------------------|-----------------------------------|----------------------------------------------|
|                                                                                                       |                                   | *lymphedema*                                 |
|                                                                                                       |                                   | *hypoten*                                    |
|                                                                                                       |                                   | *Telangiect*                                 |
|                                                                                                       |                                   | *Vasculit*                                   |
|                                                                                                       |                                   | *body* *tumour*                              |
|                                                                                                       |                                   | *Claudication*                               |
|                                                                                                       |                                   | *Varicose*                                   |
|                                                                                                       |                                   | *Venous* *insufficiency*                     |
|                                                                                                       |                                   | *artery* *dissection*                        |
| Renal disease: mild kidney disease (CKD) stage 2 and 3, with an eGFR measurement in the past 6 months | Renal disease, stage 2 or greater | *CKD*                                        |
|                                                                                                       |                                   | *renal* *disease*                            |
|                                                                                                       |                                   | *renal* *failure*                            |
|                                                                                                       |                                   | *renal* *insufficiency*                      |
|                                                                                                       |                                   | *renal* *disorder*                           |
|                                                                                                       |                                   | *kidney* *disease*                           |
|                                                                                                       |                                   | *kidney* *disorder*                          |
|                                                                                                       |                                   | *kidney* *failure*                           |
|                                                                                                       |                                   | *eGFR*                                       |
|                                                                                                       |                                   | *estimated* *glomerular* *filtration* *rate* |
|                                                                                                       |                                   | *disease* *renal*                            |
|                                                                                                       |                                   | *failure* *renal*                            |
|                                                                                                       |                                   | *insufficiency* *renal*                      |
|                                                                                                       |                                   | *disorder* *renal*                           |
|                                                                                                       |                                   | *disease* *kidney*                           |
|                                                                                                       |                                   | *disorder* *kidney*                          |
|                                                                                                       |                                   | *failure* *kidney*                           |
| Chronic liver disease                                                                                 | Chronic liver disease             | *biliary c*                                  |
|                                                                                                       |                                   | *destructive* *chol*                         |
|                                                                                                       |                                   | *cirrhos*                                    |
|                                                                                                       |                                   | *sclero* *cholangit*                         |
|                                                                                                       |                                   | *recurr* *cholangit*                         |
|                                                                                                       |                                   | *chron* *cholangit*                          |
|                                                                                                       |                                   | *chron* *hepat*                              |
|                                                                                                       |                                   | *hepat* *chron*                              |
|                                                                                                       |                                   | *acute* *yellow* *atroph*                    |
|                                                                                                       |                                   | *hepat* *notif*                              |
|                                                                                                       |                                   | *granul* *hepat*                             |
|                                                                                                       |                                   | *alpha* *hepat*                              |
|                                                                                                       |                                   | *hepat* *tox*                                |
|                                                                                                       |                                   | *toxop* *hepat*                              |
|                                                                                                       |                                   | *acute hepatitis c*                          |
|                                                                                                       |                                   | *alcoh* *hepat*                              |
|                                                                                                       |                                   | *subacute* *hepat*                           |
|                                                                                                       |                                   | *nonspec* *hepat*                            |
|                                                                                                       |                                   | *nonalco* *liver* *dis*                      |
|                                                                                                       |                                   | *hepat* *malaria*                            |
|                                                                                                       |                                   | *malaria* *hepat*                            |
|                                                                                                       |                                   | *autoimm* *hepat*                            |
|                                                                                                       |                                   | *hepatitis c without*                        |

---

ANDERSEN ET AL (2023)  
 PERSONS DIAGNOSED WITH COVID IN ENGLAND IN THE CPRD: A COHORT DESCRIPTION

---

|                                                                     |                                                                                                                                                                                                                                                                                                                                                                                                                                                                                                                                |                                                                                                                                                                                                                                                                                                                                         |
|---------------------------------------------------------------------|--------------------------------------------------------------------------------------------------------------------------------------------------------------------------------------------------------------------------------------------------------------------------------------------------------------------------------------------------------------------------------------------------------------------------------------------------------------------------------------------------------------------------------|-----------------------------------------------------------------------------------------------------------------------------------------------------------------------------------------------------------------------------------------------------------------------------------------------------------------------------------------|
|                                                                     |                                                                                                                                                                                                                                                                                                                                                                                                                                                                                                                                | <pre> **toxic* *hepat* **hepatitis C* **sequelae* *viral* *hep* **chron* *liver* *dis* **oesoph* *varices* **varices* *oesoph* **hepat* *coma* **coma* *hepat* **enceph* *hepat* 'hepat* *enceph* **sequelae* *liver* **liver* *sequelae* **portal* *hyperten* **hepatoren* *syndro* **syndro* *hepatoren* **eosophag* *varices* </pre> |
| Chronic neurological disease (including dementia, stroke, epilepsy) | <p>Davidson, J and Warren-Gash, C (2022). Clinical codelist - CPRD Aurum - chronic neurological disease. [Data Collection]. London School of Hygiene &amp; Tropical Medicine, London, United Kingdom. <a href="https://doi.org/10.17037/DATA.00002817">https://doi.org/10.17037/DATA.00002817</a>.</p> <p>PANORAMIC criteria details epilepsy and stroke as chronic neurological conditions which were not reflected in the existing code list, and were added using the following search terms</p> <p>Epilepsy<br/>Stroke</p> | <pre> *epilep* *stroke* *stroke* *cerebr* *inforc* *cerebr* *acc* *CVA* *Tran* *ischemic* </pre>                                                                                                                                                                                                                                        |
| Severe and profound learning disability                             | <p>Severe and profound learning disability (including terms that 'definitely' indicate a learning disability)</p> <p>Angelman syndrome<br/>Coffin-Lowry syndrome<br/>Cornelia de lange syndrome<br/>Cri du chat syndrome</p> <p>Dubowitz's syndrome<br/>Edward's syndrome</p> <p>Hurler's syndrome</p> <p>Laurence-Moon Syndrome<br/>Mowat-Wilson syndrome<br/>Patau syndrome</p>                                                                                                                                              | <pre> *learning* *dis* *learning* *diff* *retard*  *angelman* *Coffin-lowry* *cornelia* *lange* *cri du chat* *5p Deletion* *cat* *cry* *dubowitz* *edwards* *synd* *Trisomy* *18* *hurler* *mucopolysacc* *laurence-moon* *Mowat-Wilson* *Patau* *Trisomy* *13* </pre>                                                                 |

---

ANDERSEN ET AL (2023)

PERSONS DIAGNOSED WITH COVID IN ENGLAND IN THE CPRD: A COHORT DESCRIPTION

|                                                                                                                                                                                                                                                                                    |                                                                                                                                                                                                                                                                     |                                                                                                            |
|------------------------------------------------------------------------------------------------------------------------------------------------------------------------------------------------------------------------------------------------------------------------------------|---------------------------------------------------------------------------------------------------------------------------------------------------------------------------------------------------------------------------------------------------------------------|------------------------------------------------------------------------------------------------------------|
|                                                                                                                                                                                                                                                                                    | Rett syndrome                                                                                                                                                                                                                                                       | *rett *                                                                                                    |
|                                                                                                                                                                                                                                                                                    | Smith-Magenis syndrome                                                                                                                                                                                                                                              | *Smith-Magenis*                                                                                            |
|                                                                                                                                                                                                                                                                                    | Wolff - Hirschorn syndrome                                                                                                                                                                                                                                          | *Chromosome* *deletion*                                                                                    |
|                                                                                                                                                                                                                                                                                    |                                                                                                                                                                                                                                                                     | *wolf* *Hirs*                                                                                              |
| Down's syndrome                                                                                                                                                                                                                                                                    | Down's syndrome                                                                                                                                                                                                                                                     | *down*                                                                                                     |
|                                                                                                                                                                                                                                                                                    |                                                                                                                                                                                                                                                                     | *trisom*                                                                                                   |
|                                                                                                                                                                                                                                                                                    |                                                                                                                                                                                                                                                                     | *mongol*                                                                                                   |
| Diabetes mellitus<br>(Type I or Type II)                                                                                                                                                                                                                                           | Type I                                                                                                                                                                                                                                                              | *type 1 dia*                                                                                               |
|                                                                                                                                                                                                                                                                                    |                                                                                                                                                                                                                                                                     | *type I dia*                                                                                               |
|                                                                                                                                                                                                                                                                                    |                                                                                                                                                                                                                                                                     | *diabetes mellitus juv*                                                                                    |
|                                                                                                                                                                                                                                                                                    |                                                                                                                                                                                                                                                                     | *diabetes mellitus                                                                                         |
|                                                                                                                                                                                                                                                                                    |                                                                                                                                                                                                                                                                     | *insulin dep*                                                                                              |
|                                                                                                                                                                                                                                                                                    |                                                                                                                                                                                                                                                                     | *juvenile onset dia*                                                                                       |
|                                                                                                                                                                                                                                                                                    |                                                                                                                                                                                                                                                                     | *juvenile-onset dia*                                                                                       |
|                                                                                                                                                                                                                                                                                    |                                                                                                                                                                                                                                                                     | *juvenile-onset                                                                                            |
|                                                                                                                                                                                                                                                                                    |                                                                                                                                                                                                                                                                     | *diabetes mellitus type 1*                                                                                 |
|                                                                                                                                                                                                                                                                                    |                                                                                                                                                                                                                                                                     | *diabetes mellitus type I*                                                                                 |
|                                                                                                                                                                                                                                                                                    |                                                                                                                                                                                                                                                                     | *diabetes type 1*                                                                                          |
|                                                                                                                                                                                                                                                                                    |                                                                                                                                                                                                                                                                     | *diabetes type I*                                                                                          |
|                                                                                                                                                                                                                                                                                    | Type II                                                                                                                                                                                                                                                             | *type 2 dia*                                                                                               |
|                                                                                                                                                                                                                                                                                    |                                                                                                                                                                                                                                                                     | *type II dia*                                                                                              |
|                                                                                                                                                                                                                                                                                    |                                                                                                                                                                                                                                                                     | *adult onset dia*                                                                                          |
|                                                                                                                                                                                                                                                                                    |                                                                                                                                                                                                                                                                     | *adult-onset dia*                                                                                          |
|                                                                                                                                                                                                                                                                                    |                                                                                                                                                                                                                                                                     | *non-insulin dep*                                                                                          |
|                                                                                                                                                                                                                                                                                    |                                                                                                                                                                                                                                                                     | *noninsulin dep*                                                                                           |
|                                                                                                                                                                                                                                                                                    |                                                                                                                                                                                                                                                                     | *non-insulin-dep*                                                                                          |
|                                                                                                                                                                                                                                                                                    |                                                                                                                                                                                                                                                                     | *NIDDM*                                                                                                    |
|                                                                                                                                                                                                                                                                                    |                                                                                                                                                                                                                                                                     | *T2D*                                                                                                      |
|                                                                                                                                                                                                                                                                                    |                                                                                                                                                                                                                                                                     | *diabetes type 2*                                                                                          |
|                                                                                                                                                                                                                                                                                    |                                                                                                                                                                                                                                                                     | *diabetes mellitus type 2*                                                                                 |
|                                                                                                                                                                                                                                                                                    |                                                                                                                                                                                                                                                                     | *diabetes type II*                                                                                         |
|                                                                                                                                                                                                                                                                                    |                                                                                                                                                                                                                                                                     | *diabetes mellitus type II*                                                                                |
|                                                                                                                                                                                                                                                                                    |                                                                                                                                                                                                                                                                     | type 2*                                                                                                    |
|                                                                                                                                                                                                                                                                                    |                                                                                                                                                                                                                                                                     | type II*                                                                                                   |
|                                                                                                                                                                                                                                                                                    |                                                                                                                                                                                                                                                                     | *diabetes mellitus adult*                                                                                  |
| Immunosuppression:<br>primary (e.g.,<br>inherited immune<br>disorders resulting<br>from genetic<br>mutations, usually<br>present at birth and<br>diagnosed in<br>childhood) or<br>secondary due to<br>disease or treatment<br>(e.g., sickle cell, HIV,<br>cancer,<br>chemotherapy) | Forbes, H (2020). Therapy Code List - Immunosuppression Aurum Therapy Codes. [Data Collection]. London School of Hygiene & Tropical Medicine, London, United Kingdom. <a href="https://doi.org/10.17037/DATA.00001589">https://doi.org/10.17037/DATA.00001589</a> . | We filtered among therapy codes for moderate immunosuppression for those drugs classified as chemotherapy. |



ANDERSEN ET AL (2023)

## PERSONS DIAGNOSED WITH COVID IN ENGLAND IN THE CPRD: A COHORT DESCRIPTION

|                                                              |                                                                                                                                                                                                                                                                    |                                                                                                                                                                                                                                                                       |
|--------------------------------------------------------------|--------------------------------------------------------------------------------------------------------------------------------------------------------------------------------------------------------------------------------------------------------------------|-----------------------------------------------------------------------------------------------------------------------------------------------------------------------------------------------------------------------------------------------------------------------|
| Solid organ, bone marrow and stem cell transplant recipients | Forbes, H (2020). Clinical Code List - Moderate Immunosuppression OPCS Codes. [Data Collection]. London School of Hygiene & Tropical Medicine, London, United Kingdom. <a href="https://doi.org/10.17037/DATA.00001587">https://doi.org/10.17037/DATA.00001587</a> |                                                                                                                                                                                                                                                                       |
|                                                              | Any transplant                                                                                                                                                                                                                                                     | *transplant*                                                                                                                                                                                                                                                          |
|                                                              | Solid organ transplant                                                                                                                                                                                                                                             | *organ* *recipient*<br>*heart* *recipient*<br>*lung* *recipient*<br>*pancreas* *recipient*<br>*kidney* *recipient*<br>*intestine* *recipient*<br>*gland* *recipient*<br>*stomach* *recipient*<br>*spleen* *recipient*<br>*liver* *recipient*<br>*bladder* *recipient* |
|                                                              | Bone marrow transplant                                                                                                                                                                                                                                             | *marrow* *graft*<br>*graft* *marrow*                                                                                                                                                                                                                                  |
|                                                              | Stem cell transplant                                                                                                                                                                                                                                               | *stem* *transplant*<br>*transplant* *stem*<br>*stem* graft*<br>*graft* *stem*                                                                                                                                                                                         |
| Morbid obesity (BMI > 35)                                    |                                                                                                                                                                                                                                                                    | *obes*<br>*BMI*                                                                                                                                                                                                                                                       |
| Severe mental illness                                        | Severe mental illness, unspecified                                                                                                                                                                                                                                 | *severe* *ment*<br>*acute* *ment*<br>*severe* *psy*<br>*acute* *psy*<br>*nervous break*                                                                                                                                                                               |
|                                                              | Schizophrenia                                                                                                                                                                                                                                                      | *schiz*<br>*psycot*<br>*psychosis*<br>*mania*<br>mania*<br>*manic*                                                                                                                                                                                                    |
|                                                              | Bipolar disorder                                                                                                                                                                                                                                                   | *bipo*                                                                                                                                                                                                                                                                |
|                                                              | Self-harm                                                                                                                                                                                                                                                          | *self harm*<br>*cutt*<br>*self* *in*<br>*self-i*<br>*self-h*                                                                                                                                                                                                          |
|                                                              | Obsessive-compulsive disorder                                                                                                                                                                                                                                      | *OCD*<br>*obsess*                                                                                                                                                                                                                                                     |
|                                                              | Eating disorder                                                                                                                                                                                                                                                    | *anor*<br>*bulimia*<br>*eating dis*                                                                                                                                                                                                                                   |
|                                                              | Medicines for severe mental illness                                                                                                                                                                                                                                | Agomelatine<br>Amoxapine<br>Clomipramine hydrochloride<br>Dosulepin hydrochloride<br>Doxepin hydrochloride<br>Imipramine hydrochloride                                                                                                                                |

ANDERSEN ET AL (2023)  
 PERSONS DIAGNOSED WITH COVID IN ENGLAND IN THE CPRD: A COHORT DESCRIPTION

---

|                                                                                                                                                                                                  |                                                                                                                                                                                                                                                                                                 |
|--------------------------------------------------------------------------------------------------------------------------------------------------------------------------------------------------|-------------------------------------------------------------------------------------------------------------------------------------------------------------------------------------------------------------------------------------------------------------------------------------------------|
|                                                                                                                                                                                                  | Isocarboxazid<br>Lofepamine hydrochloride<br>Loxapine succinate<br>Moclobemide<br>Nefazodone hydrochloride<br>Phenelzine sulfate<br>Reboxetine mesilate<br>Tranylcypromine sulfate<br>Trazodone hydrochloride<br>Trimipramine maleate<br>Venlafaxine hydrochloride<br>Vortioxetine hydrobromide |
| Community and care home resident                                                                                                                                                                 | *nursing home*<br>*home* *nursing*<br>*care* *home*<br>*home* *care*<br>*residen* *care*<br>*care* *resident*                                                                                                                                                                                   |
| Judged by recruiting medically qualified professional, research nurse, nurse prescriber, prescribing pharmacist, dependent on the ISA for the specific IMP involved, to be clinically vulnerable | Unable to define, given nature of secondary database research.                                                                                                                                                                                                                                  |

---

ANDERSEN ET AL (2023)

PERSONS DIAGNOSED WITH COVID IN ENGLAND IN THE CPRD: A COHORT DESCRIPTION

**Supplemental file 1, Table 5: Search Terms for UK Health Security Agency Clinical Risk Group Definition**

| Classification as written in Green Book                                                                                 | Concept as written in Green Book                                                                                        | Search terms                                                                                                                                                                                                                                                                                                |                 |
|-------------------------------------------------------------------------------------------------------------------------|-------------------------------------------------------------------------------------------------------------------------|-------------------------------------------------------------------------------------------------------------------------------------------------------------------------------------------------------------------------------------------------------------------------------------------------------------|-----------------|
| Chronic respiratory disease – individuals with a severe lung condition                                                  | Poorly controlled asthma                                                                                                | Asthma with an oral corticosteroid use in the past 24 months                                                                                                                                                                                                                                                |                 |
|                                                                                                                         | Chronic obstructive pulmonary disease (COPD), including chronic bronchitis and emphysema                                | Davidson, J, Warren-Gash, C and Mcdonald, H (2021). Clinical codelist - CPRD Aurum - chronic respiratory disease. [Data Collection]. London School of Hygiene & Tropical Medicine, London, United Kingdom.<br><a href="https://doi.org/10.17037/DATA.00002214">https://doi.org/10.17037/DATA.00002214</a> . |                 |
|                                                                                                                         |                                                                                                                         | *bronchiec*                                                                                                                                                                                                                                                                                                 |                 |
|                                                                                                                         | Bronchiectasis                                                                                                          | Davidson, J, Warren-Gash, C and Mcdonald, H (2021). Clinical codelist - CPRD Aurum - chronic respiratory disease. [Data Collection]. London School of Hygiene & Tropical Medicine, London, United Kingdom.<br><a href="https://doi.org/10.17037/DATA.00002214">https://doi.org/10.17037/DATA.00002214</a> . |                 |
|                                                                                                                         | Cystic fibrosis                                                                                                         | *pulmon* *fibros*                                                                                                                                                                                                                                                                                           |                 |
|                                                                                                                         | Interstitial lung fibrosis                                                                                              | *lung* *fibros*                                                                                                                                                                                                                                                                                             |                 |
| Pneumoconiosis                                                                                                          | Pneumoconiosis                                                                                                          | *fibros* *lung*                                                                                                                                                                                                                                                                                             |                 |
|                                                                                                                         |                                                                                                                         | *ipf*                                                                                                                                                                                                                                                                                                       |                 |
|                                                                                                                         |                                                                                                                         | *pneumocon*                                                                                                                                                                                                                                                                                                 |                 |
| Bronchopulmonary dysplasia (BPD)                                                                                        | Bronchopulmonary dysplasia (BPD)                                                                                        | *asbestosis*                                                                                                                                                                                                                                                                                                |                 |
|                                                                                                                         |                                                                                                                         | *silicos*                                                                                                                                                                                                                                                                                                   |                 |
| Chronic heart disease and vascular disease                                                                              | Congenital heart disease                                                                                                | *broncho* *dysplas*                                                                                                                                                                                                                                                                                         |                 |
|                                                                                                                         |                                                                                                                         | *BDP*                                                                                                                                                                                                                                                                                                       |                 |
|                                                                                                                         | Hypertension with cardiac complications                                                                                 | Hypertension with cardiac complications                                                                                                                                                                                                                                                                     | *congen* *hear* |
|                                                                                                                         |                                                                                                                         |                                                                                                                                                                                                                                                                                                             | *congen* *card* |
|                                                                                                                         | Chronic heart failure                                                                                                   | Chronic heart failure                                                                                                                                                                                                                                                                                       | *CHD*           |
|                                                                                                                         |                                                                                                                         |                                                                                                                                                                                                                                                                                                             | *hyperten*      |
| *high* *blood* *pres*                                                                                                   |                                                                                                                         |                                                                                                                                                                                                                                                                                                             |                 |
| * bp *                                                                                                                  |                                                                                                                         |                                                                                                                                                                                                                                                                                                             |                 |
| Individuals requiring regular medication and/or follow-up for ischaemic heart disease (includes individuals with atrial | Individuals requiring regular medication and/or follow-up for ischaemic heart disease (includes individuals with atrial | *bp*                                                                                                                                                                                                                                                                                                        |                 |
|                                                                                                                         |                                                                                                                         | *HBP*                                                                                                                                                                                                                                                                                                       |                 |
|                                                                                                                         |                                                                                                                         | *HTN*                                                                                                                                                                                                                                                                                                       |                 |
|                                                                                                                         |                                                                                                                         | *CCF*                                                                                                                                                                                                                                                                                                       |                 |
|                                                                                                                         |                                                                                                                         | *CHF*                                                                                                                                                                                                                                                                                                       |                 |
|                                                                                                                         |                                                                                                                         | *hear* *fail*                                                                                                                                                                                                                                                                                               |                 |
| Individuals requiring regular medication and/or follow-up for ischaemic heart disease (includes individuals with atrial | Individuals requiring regular medication and/or follow-up for ischaemic heart disease (includes individuals with atrial | *card* *fail*                                                                                                                                                                                                                                                                                               |                 |
|                                                                                                                         |                                                                                                                         | *hear* *diseas*                                                                                                                                                                                                                                                                                             |                 |
|                                                                                                                         |                                                                                                                         | *artero* *diseas*                                                                                                                                                                                                                                                                                           |                 |
|                                                                                                                         |                                                                                                                         | *vasc* *diseas*                                                                                                                                                                                                                                                                                             |                 |
| Individuals requiring regular medication and/or follow-up for ischaemic heart disease (includes individuals with atrial | Individuals requiring regular medication and/or follow-up for ischaemic heart disease (includes individuals with atrial | *CAD*                                                                                                                                                                                                                                                                                                       |                 |
|                                                                                                                         |                                                                                                                         | *ihd*                                                                                                                                                                                                                                                                                                       |                 |

ANDERSEN ET AL (2023)

PERSONS DIAGNOSED WITH COVID IN ENGLAND IN THE CPRD: A COHORT DESCRIPTION

|                        |                                                                                   |                                                                                                                                                                                                                                                                                                                                                                                             |
|------------------------|-----------------------------------------------------------------------------------|---------------------------------------------------------------------------------------------------------------------------------------------------------------------------------------------------------------------------------------------------------------------------------------------------------------------------------------------------------------------------------------------|
|                        | fibrillation, peripheral vascular disease or a history of venous thromboembolism) | *myocard*<br>*isch*<br>*chd*<br>*fibrilla*<br>*afib*<br>*VTE*<br>*thrombo*<br>*DVT*<br>*blood* *clot*<br>*pulmon* *embolis*<br>*pe*                                                                                                                                                                                                                                                         |
| Chronic kidney disease | At stage 3, 4 or 5<br>Chronic kidney failure                                      | *CKD*<br>*renal* *disease*<br>*renal* *failure*<br>*renal* *insufficiency*<br>*renal* *disorder*<br>*kidney* *disease*<br>*kidney* *disorder*<br>*kidney* *failure*<br>*eGFR*<br>*estimated* *glomerular* *filtration* *rate*<br>*disease* *renal*<br>*failure* *renal*<br>*insufficiency* *renal*<br>*disorder* *renal*<br>*disease* *kidney*<br>*disorder* *kidney*<br>*failure* *kidney* |
|                        | Nephrotic syndrome<br>Kidney transplantation                                      | *nephro*<br>Davidson, J, Warren-Gash, C, Mcdonald, H, Evans, D and Clay, S (2021). Clinical codelist - chronic kidney disease. [Data Collection]. London School of Hygiene & Tropical Medicine, London, United Kingdom.<br><a href="https://doi.org/10.17037/DATA.00002406">https://doi.org/10.17037/DATA.00002406</a> .                                                                    |
|                        |                                                                                   | We selected transplant-specific codes.                                                                                                                                                                                                                                                                                                                                                      |
| Chronic liver disease  | Chronic hepatitis                                                                 | *chron* *hepat**<br>*hepat* *chron**<br>*acute* *yellow* *atroph**<br>*hepat* *notif**<br>*granul* *hepat**<br>*alpha* *hepat**<br>*hepat* *tox**<br>*toxop* *hepat**<br>*acute hepatitis c**<br>*alcoh* *hepat**<br>*subacute* *hepat**                                                                                                                                                    |

ANDERSEN ET AL (2023)

PERSONS DIAGNOSED WITH COVID IN ENGLAND IN THE CPRD: A COHORT DESCRIPTION

|                              |                                                                                                                                          |                                                                                                                                                                                                                                                                                                                                                                                                                                                                                                                                                                                                                             |
|------------------------------|------------------------------------------------------------------------------------------------------------------------------------------|-----------------------------------------------------------------------------------------------------------------------------------------------------------------------------------------------------------------------------------------------------------------------------------------------------------------------------------------------------------------------------------------------------------------------------------------------------------------------------------------------------------------------------------------------------------------------------------------------------------------------------|
|                              |                                                                                                                                          | *nonspec* *hepat*<br>*nonalco* *liver* *dis*<br>*hepat* *malaria*<br>*malaria* *hepat*<br>*autoimm* *hepat*<br>*hepatitis c without*<br>*toxic* *hepat*<br>*hepatitis C*<br>*sequelae* *viral* *hep*<br>*chron* *liver* *dis*<br>*oesoph* *varices*<br>*varices* *oesoph*<br>*hepat* *coma*<br>**coma* *hepat*<br>*enceph* *hepat*<br>hepat* *enceph*<br>*sequelae* *liver*<br>*liver* *sequelae*<br>*portal* *hyperten*<br>*hepatoren* *syndro*<br>*syndro* *hepatoren*<br>*oesophag* *varices*<br>*cirrhos*<br>*biliary c*<br>*destructive* *chol*<br>*sclero* *cholangit*<br>*recurr* *cholangit*<br>*chron* *cholangit* |
|                              | Cirrhosis                                                                                                                                |                                                                                                                                                                                                                                                                                                                                                                                                                                                                                                                                                                                                                             |
|                              | Biliary atresia                                                                                                                          |                                                                                                                                                                                                                                                                                                                                                                                                                                                                                                                                                                                                                             |
| Chronic neurological disease | Stroke                                                                                                                                   | *stroke*<br>*cerebr* *infarc*<br>*cerebr* *acc*<br>*CVA*<br>*tran* *ischemic*                                                                                                                                                                                                                                                                                                                                                                                                                                                                                                                                               |
|                              | Transient ischaemic attack (TIA)                                                                                                         |                                                                                                                                                                                                                                                                                                                                                                                                                                                                                                                                                                                                                             |
|                              | Conditions in which respiratory function may be compromised due to neurological or neuromuscular disease (e.g. polio syndrome sufferers) | *polio*<br>*infant* *parlay*<br>*heine* *dis*                                                                                                                                                                                                                                                                                                                                                                                                                                                                                                                                                                               |
|                              | Cerebral palsy                                                                                                                           | *cereb* *palsy*<br>*cereb palsy*<br>*cp*                                                                                                                                                                                                                                                                                                                                                                                                                                                                                                                                                                                    |
|                              | Severe or profound and multiple learning disabilities (PMLD) including all those on the learning disability register                     | *learning* *dis*<br>*learning* *diff*<br>*retard*<br>*angelman*<br>*Coffin-lowry*<br>*cornelia* *lange*                                                                                                                                                                                                                                                                                                                                                                                                                                                                                                                     |

ANDERSEN ET AL (2023)

PERSONS DIAGNOSED WITH COVID IN ENGLAND IN THE CPRD: A COHORT DESCRIPTION

---

|                                                 |                                                                                                                                                               |                                             |
|-------------------------------------------------|---------------------------------------------------------------------------------------------------------------------------------------------------------------|---------------------------------------------|
|                                                 |                                                                                                                                                               | *cri du chat*                               |
|                                                 |                                                                                                                                                               | *5p Deletion*                               |
|                                                 |                                                                                                                                                               | *cat* *cry*                                 |
|                                                 |                                                                                                                                                               | *dubowitz*                                  |
|                                                 |                                                                                                                                                               | *edwards* *synd*                            |
|                                                 |                                                                                                                                                               | *Trisomy* *18*                              |
|                                                 |                                                                                                                                                               | *hurler*                                    |
|                                                 |                                                                                                                                                               | *mucopolysacc*                              |
|                                                 |                                                                                                                                                               | *laurence-moon*                             |
|                                                 |                                                                                                                                                               | *Mowat-Wilson*                              |
|                                                 |                                                                                                                                                               | *Patau*                                     |
|                                                 |                                                                                                                                                               | *Trisomy* *13*                              |
|                                                 |                                                                                                                                                               | *rett *                                     |
|                                                 |                                                                                                                                                               | *Smith-Magenis*                             |
|                                                 |                                                                                                                                                               | *Chromosome* *deletion*                     |
|                                                 |                                                                                                                                                               | *wolf* *Hirs*                               |
|                                                 | Down's syndrome                                                                                                                                               | *down*                                      |
|                                                 |                                                                                                                                                               | *trisomy*                                   |
|                                                 |                                                                                                                                                               | *mongol*                                    |
|                                                 | Multiple sclerosis                                                                                                                                            | *multiple sclerosis*                        |
|                                                 |                                                                                                                                                               | *sclerosis multiple*                        |
|                                                 |                                                                                                                                                               | *encephalomyelit* *disseminat*              |
|                                                 |                                                                                                                                                               | *ms*                                        |
|                                                 | Epilepsy                                                                                                                                                      | *epilep*                                    |
|                                                 | Dementia                                                                                                                                                      | *demen*                                     |
|                                                 |                                                                                                                                                               | *senil*                                     |
|                                                 | Parkinson's disease                                                                                                                                           | *parkinson*                                 |
|                                                 |                                                                                                                                                               | *hypo* *rigid*                              |
|                                                 |                                                                                                                                                               | *parlay* *agit*                             |
|                                                 |                                                                                                                                                               | *shak* *pals*                               |
|                                                 |                                                                                                                                                               | *pd *                                       |
|                                                 | Motor neurone disease and related or similar conditions, hereditary and degenerative disease of the nervous system or muscles, severe neurological disability | *motor* *neurone* *disease*                 |
|                                                 |                                                                                                                                                               | *kennedy*                                   |
|                                                 |                                                                                                                                                               | *amyotrophic* *lateral* *sclerosis*         |
|                                                 |                                                                                                                                                               | *ALS*                                       |
|                                                 |                                                                                                                                                               | *primary* *lateral* *sclerosis*             |
|                                                 |                                                                                                                                                               | *progressive* *bulbar* *palsy*              |
|                                                 |                                                                                                                                                               | *progressive* *spinal* *muscular* *atrophy* |
|                                                 |                                                                                                                                                               | *myo*                                       |
| Diabetes mellitus and other endocrine disorders | Type I                                                                                                                                                        | *type 1 dia*                                |
|                                                 |                                                                                                                                                               | *type I dia*                                |
|                                                 |                                                                                                                                                               | *diabetes mellitus juv*                     |
|                                                 |                                                                                                                                                               | *diabetes mellitus                          |
|                                                 |                                                                                                                                                               | *insulin dep*                               |
|                                                 |                                                                                                                                                               | *juvenile onset dia*                        |
|                                                 |                                                                                                                                                               | *juvenile-onset dia*                        |
|                                                 |                                                                                                                                                               | *juvenile-onset                             |
|                                                 |                                                                                                                                                               | *diabetes mellitus type 1*                  |
|                                                 |                                                                                                                                                               | *diabetes mellitus type I*                  |
|                                                 |                                                                                                                                                               | *diabetes type 1*                           |

---

ANDERSEN ET AL (2023)  
 PERSONS DIAGNOSED WITH COVID IN ENGLAND IN THE CPRD: A COHORT DESCRIPTION

|                                               |                                                               |                                                                                                                                                                                                                                                                                                                                                                                                                                                                                              |
|-----------------------------------------------|---------------------------------------------------------------|----------------------------------------------------------------------------------------------------------------------------------------------------------------------------------------------------------------------------------------------------------------------------------------------------------------------------------------------------------------------------------------------------------------------------------------------------------------------------------------------|
|                                               | Type II                                                       | <ul style="list-style-type: none"> <li>*diabetes type I*</li> <li>*type 2 dia*</li> <li>*type II dia*</li> <li>*adult onset dia*</li> <li>*adult-onset dia*</li> <li>*non-insulin dep*</li> <li>*noninsulin dep*</li> <li>*non-insulin-dep*</li> <li>*NIDDM*</li> <li>*T2D*</li> <li>*diabetes type 2*</li> <li>*diabetes mellitus type 2*</li> <li>*diabetes type II*</li> <li>*diabetes mellitus type II*</li> <li>type 2*</li> <li>type II*</li> <li>*diabetes mellitus adult*</li> </ul> |
|                                               | Addison's disease                                             | <ul style="list-style-type: none"> <li>*Addison*</li> <li>*adren* *insuff*</li> <li>*hypocort*</li> <li>*hypoadren*</li> </ul>                                                                                                                                                                                                                                                                                                                                                               |
| Immunosuppression due to disease or treatment | Patients undergoing chemotherapy leading to immunosuppression | <p>Forbes, H (2020). Therapy Code List - Immunosuppression Aurum Therapy Codes. [Data Collection]. London School of Hygiene &amp; Tropical Medicine, London, United Kingdom.<br/> <a href="https://doi.org/10.17037/DATA.00001589">https://doi.org/10.17037/DATA.00001589</a>.</p>                                                                                                                                                                                                           |
|                                               | Patients undergoing radical radiotherapy                      | <p>We filtered among therapy codes for moderate immunosuppression for those drugs classified as chemotherapy.<br/>         Davidson, J, Warren-Gash, C and Mcdonald, H (2021). Clinical codelist - CPRD Aurum - Immuosuppressive conditions. [Data Collection]. London School of Hygiene &amp; Tropical Medicine, London, United Kingdom.<br/> <a href="https://doi.org/10.17037/DATA.00002234">https://doi.org/10.17037/DATA.00002234</a>.</p>                                              |
|                                               | Solid organ transplant recipients                             | <p>We filtered for radiotherapy-specific codes.</p> <ul style="list-style-type: none"> <li>*transplant*</li> <li>*organ* *recipient**</li> <li>*heart* *recipient**</li> <li>*lung* *recipient**</li> <li>*pancreas* *recipient**</li> <li>*kidney* *recipient**</li> <li>*intestine* *recipient**</li> <li>*gland* *recipient**</li> <li>*stomach* *recipient**</li> <li>*spleen* *recipient**</li> <li>*liver* *recipient**</li> </ul>                                                     |

ANDERSEN ET AL (2023)

PERSONS DIAGNOSED WITH COVID IN ENGLAND IN THE CPRD: A COHORT DESCRIPTION

---

|                                                                                                                                                                                                                                                                                                                                             |                                                                                                                                                                                                                                                                                                                                                                                                                            |
|---------------------------------------------------------------------------------------------------------------------------------------------------------------------------------------------------------------------------------------------------------------------------------------------------------------------------------------------|----------------------------------------------------------------------------------------------------------------------------------------------------------------------------------------------------------------------------------------------------------------------------------------------------------------------------------------------------------------------------------------------------------------------------|
| Bone marrow or stem cell transplant recipients                                                                                                                                                                                                                                                                                              | *bladder* *recipient*<br>LSHTM - Forbes, H (2020). Clinical Code List - Moderate Immunosuppression OPCS Codes. [Data Collection]. London School of Hygiene & Tropical Medicine, London, United Kingdom.<br><a href="https://doi.org/10.17037/DATA.00001587">https://doi.org/10.17037/DATA.00001587</a> .                                                                                                                   |
| HIV infection at all stages                                                                                                                                                                                                                                                                                                                 | *HIV*<br>*immunodeficiency vir*                                                                                                                                                                                                                                                                                                                                                                                            |
| Multiple myeloma or genetic disorders affecting the immune system (e.g. IRAK-4, NEMO, complement disorder, SCID)                                                                                                                                                                                                                            | *myelom*<br>*kahler*<br>*NEMO*<br>*nuclear* *fact*<br>*IKBKG* *mut*<br>*NFKB*<br>*complement*<br>*SCID*<br>*combin* *immune*<br>*alympho*<br>*glanz* *synd*<br>*immunodef* *synd*                                                                                                                                                                                                                                          |
| Individuals who are receiving immunosuppressive or immunomodulating biological therapy including, but not limited to, anti-TNF, alemtuzumab, ofatumumab, rituximab, patients receiving protein kinase inhibitors or PARP inhibitors, and individuals treated with steroid sparing agents such as cyclophosphamide and mycophenolate mofetil | Adalimumab<br>Etanercept<br>Infliximab<br>Golimumab<br>Certolizumab pegol<br>Abatacept<br>Olaparib<br>Rucaparib<br>Niraparib<br>Afatinib<br>Axitinib<br>Bosutinib<br>Cetuximab<br>Cobimetinib<br>Crizotinib<br>Cabozantinib<br>Dacomitinib<br>Dasatinib<br>Entrectinib<br>Erlotinib<br>Fostamatinib<br>Gefitinib<br>Ibrutinib<br>Imatinib<br>Lapatinib<br>Nilotinib<br>Paxopanib<br>Pegaptanib<br>Ruxolitinib<br>Sorafenib |

---



ANDERSEN ET AL (2023)  
 PERSONS DIAGNOSED WITH COVID IN ENGLAND IN THE CPRD: A COHORT DESCRIPTION

|                                                                                                      |                                                                                                                                                                                                             |                                                                                                                                               |
|------------------------------------------------------------------------------------------------------|-------------------------------------------------------------------------------------------------------------------------------------------------------------------------------------------------------------|-----------------------------------------------------------------------------------------------------------------------------------------------|
|                                                                                                      | Individuals treated with or likely to be treated with systemic steroids for more than a month at a dose equivalent to prednisolone at 20mg or more per day for adults                                       | Sunitinib<br>Vandetanib<br>Vemurafenib<br>Betamethasone<br>Cortisone<br>Dexamethasone<br>Hydrocortisone<br>Methylprednisolone<br>Prednisolone |
|                                                                                                      | Anyone with a history of haematological malignancy, including leukaemia, lymphoma, and myeloma                                                                                                              | *CMML*<br>*chronic myelom*<br>*lymph* *leuk*<br>*CLL*<br>*follic* *lymph*<br>* fl *                                                           |
|                                                                                                      | Those who require long term immunosuppressive treatment for conditions including but not limited to: systemic lupus erythematosus, rheumatoid arthritis, inflammatory bowel disease, scleroderma, psoriasis | Using drugs listed above                                                                                                                      |
| Asplenia or dysfunction of the spleen. This includes conditions that may lead to splenic dysfunction | Asplenia                                                                                                                                                                                                    | *asplen*<br>*heterotax*<br>*situs*<br>*ambig*                                                                                                 |
|                                                                                                      | Homozygous sickle cell disease                                                                                                                                                                              | *sickl*<br>*SCD*                                                                                                                              |
|                                                                                                      | Thalassemia major                                                                                                                                                                                           | *thal*                                                                                                                                        |
|                                                                                                      | Coeliac syndrome                                                                                                                                                                                            | *coelia*<br>*celia*<br>*sprue*<br>*glut* *entero*                                                                                             |
| Morbid obesity (adults with a BMI >40kg/m <sup>2</sup> )                                             | Obesity with specification of BMI >40kgm <sup>2</sup>                                                                                                                                                       | *obes*<br>*BMI*<br>Measured values using height and weight which calculate to >40 kgm/2                                                       |
| Severe mental illness                                                                                | Schizophrenia                                                                                                                                                                                               | *schiz*<br>*psycot*<br>*psychosis*<br>* mania*<br>mania*<br>*manic*                                                                           |
|                                                                                                      | Bipolar disorder                                                                                                                                                                                            | *bipo*<br>*severe* *ment*                                                                                                                     |

ANDERSEN ET AL (2023)

PERSONS DIAGNOSED WITH COVID IN ENGLAND IN THE CPRD: A COHORT DESCRIPTION

---

|                                                            |                                                             |                                                                                                                                                                                                  |
|------------------------------------------------------------|-------------------------------------------------------------|--------------------------------------------------------------------------------------------------------------------------------------------------------------------------------------------------|
|                                                            | Any mental illness that causes severe functional impairment | *acute* *ment*<br>*severe* *psy*<br>*acute* *psy*<br>*nervous break*<br>*self harm*<br>*cutt*<br>*self* *in*<br>*self-i*<br>*self-h*<br>*OCD*<br>*obsess*<br>*anor*<br>*bulimia*<br>*eating dis* |
| Pregnancy (all stages (first, second and third trimester)) | Pregnancy                                                   | *pregnan*<br>*trimest*<br>*gestat*                                                                                                                                                               |
|                                                            | End of pregnancy                                            | *birth*<br>*deliver*<br>*abortio*                                                                                                                                                                |

---

ANDERSEN ET AL (2023)  
PERSONS DIAGNOSED WITH COVID IN ENGLAND IN THE CPRD: A COHORT DESCRIPTION

**Supplemental file 1, Table 6: Cohort Attrition**

|                                                                                                                                                                                                                                                                                 | <b>Unique person ID's</b> |
|---------------------------------------------------------------------------------------------------------------------------------------------------------------------------------------------------------------------------------------------------------------------------------|---------------------------|
| Persons of any age diagnosed with COVID from August 1, 2020 through January 31, 2022 using the May 2022 CPRD Aurum data release.                                                                                                                                                | 2,631,267                 |
| Files of "acceptable research quality", as defined by CPRD.                                                                                                                                                                                                                     | 2,631,267                 |
| Continuously registered with CPRD GP practice for at least 365 days prior to COVID diagnosis, and did not have a registration end date, practice last collection date or death date prior to COVID diagnosis.                                                                   | 2,322,875                 |
| Hospital Episode Statistics (HES) Admitted Patient Care (APC) linkage eligible.                                                                                                                                                                                                 | 2,289,708                 |
| Once ONS data were received, 42 persons were noted that should have been excluded from the final cohort because ONS death data preceded index date.                                                                                                                             | 2,289,666                 |
| Excluded persons who were admitted to the hospital on or before their primary care recorded date of COVID diagnosis. Due to mandatory GP reporting guidelines, this may be lagged from the date of true test collection and therefore not accurately reflect date of diagnosis. | 2,271,072                 |

ANDERSEN ET AL (2023)  
PERSONS DIAGNOSED WITH COVID IN ENGLAND IN THE CPRD: A COHORT DESCRIPTION

**Supplemental file 1, Figure 1: Date of Diagnosis for 2,271,072 COVID Cases in CPRD Aurum, By Care Setting, August 1, 2020 through January 31, 2022**

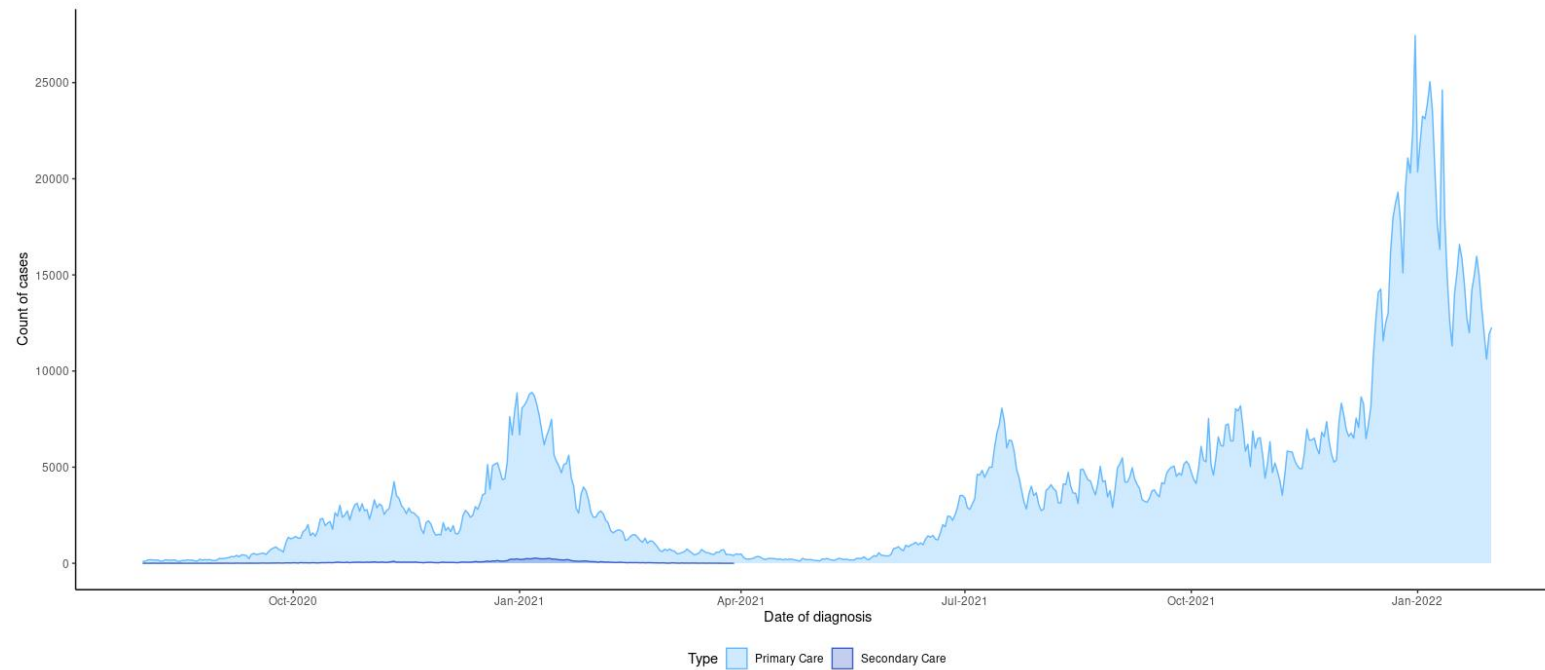

ANDERSEN ET AL (2023)

PERSONS DIAGNOSED WITH COVID IN ENGLAND IN THE CPRD: A COHORT DESCRIPTION

**Supplemental file 1, Figure 2: Date of Diagnosis for 2,257,907 Primary Care COVID Cases in CPRD Aurum, August 1, 2020 through January 31, 2022**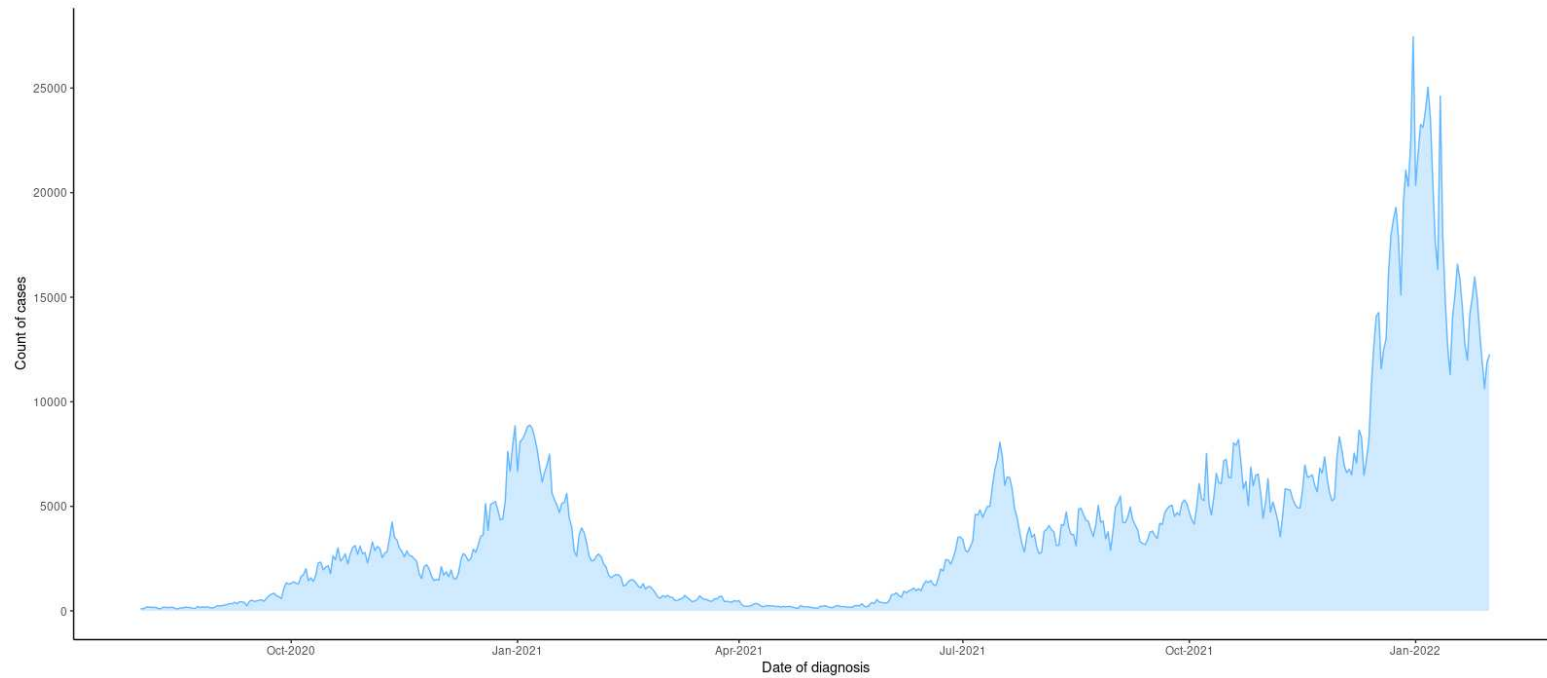

ANDERSEN ET AL (2023)

PERSONS DIAGNOSED WITH COVID IN ENGLAND IN THE CPRD: A COHORT DESCRIPTION

**Supplemental file 1, Figure 3: Date of Primary Care Recorded Diagnosis in CPRD Aurum-HES Linked Data for 13,165 Hospitalised COVID Cases, August 1, 2020 through March 31, 2021**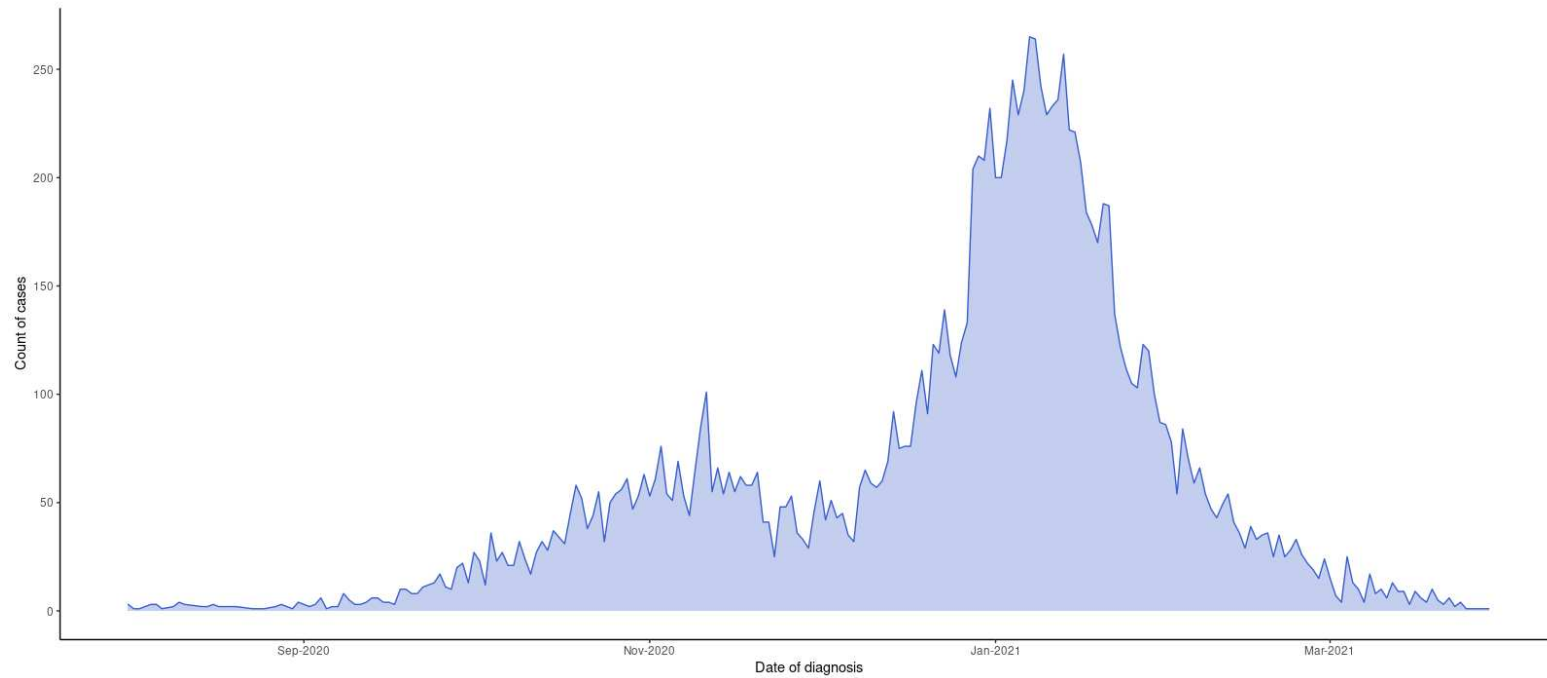

ANDERSEN ET AL (2023)

PERSONS DIAGNOSED WITH COVID IN ENGLAND IN THE CPRD: A COHORT DESCRIPTION

**Supplemental file 1, Table 7: Reference National Case Counts and Census Distributions for England**

|                            | All COVID Cases<br>(n = 20,386,786) | COVID Admissions<br>(n = 954,124) | Population of England<br>(n = 56,489,800) |
|----------------------------|-------------------------------------|-----------------------------------|-------------------------------------------|
| <b>Age groups in years</b> |                                     |                                   |                                           |
| 0-4                        | 454,587 (2%)                        | --                                | 3,077,000 (5%)                            |
| 5-9                        | 1,146,248 (6%)                      | --                                | 3,348,600 (6%)                            |
| 10-14                      | 1,626,090 (8%)                      | --                                | 3,413,100 (6%)                            |
| 15-19                      | 1,396,404 (7%)                      | --                                | 3,218,900 (6%)                            |
| 20-24                      | 1,567,499 (8%)                      | --                                | 3,414,400 (6%)                            |
| 25-29                      | 1,735,467 (9%)                      | --                                | 3,715,400 (7%)                            |
| 30-34                      | 1,795,926 (9%)                      | --                                | 3,952,600 (7%)                            |
| 35-39                      | 1,714,241 (8%)                      | --                                | 3,795,400 (7%)                            |
| 40-44                      | 1,637,287 (8%)                      | --                                | 3,580,400 (6%)                            |
| 45-49                      | 1,477,924 (7%)                      | --                                | 3,602,600 (6%)                            |
| 50-54                      | 1,431,931 (7%)                      | --                                | 3,907,700 (7%)                            |
| 55-59                      | 1,241,556 (6%)                      | --                                | 3,806,300 (7%)                            |
| 60-64                      | 929,614 (5%)                        | --                                | 3,256,100 (6%)                            |
| 65-69                      | 626,179 (3%)                        | --                                | 2,767,500 (5%)                            |
| 70-74                      | 523,000 (3%)                        | --                                | 2,796,600 (5%)                            |
| 75-79                      | 391,839 (2%)                        | --                                | 2,038,800 (4%)                            |
| 80-84                      | 277,529 (1%)                        | --                                | 1,427,900 (2%)                            |
| 85-89                      | 277,112 (1%)                        | --                                | 872,200 (2%)                              |
| 90+                        | 192,353 (1%)                        | --                                | 498,200 (< 1%)                            |
| 0-5                        | --                                  | 20,400 (2%)                       | --                                        |
| 6-17                       | --                                  | 13,942 (1%)                       | --                                        |
| 18-64                      | --                                  | 335,675 (35%)                     | --                                        |
| 65-84                      | --                                  | 379,584 (40%)                     | --                                        |
| 85+                        | --                                  | 199,497 (21%)                     | --                                        |
| Unknown                    | --                                  | 5,026 (1%)                        | --                                        |
| <b>Sex</b>                 |                                     |                                   |                                           |
| Male                       | 9,245,295 (45%)                     | --                                | 27,656,300 (49%)                          |
| Female                     | 11,141,491 (55%)                    | --                                | 28,833,500 (51%)                          |
| <b>Region</b>              |                                     |                                   |                                           |
| North East                 | 948,543 (5%)                        | --                                | 2,647,100 (5%)                            |
| North West                 | 2,582,413 (13%)                     | --                                | 7,417,300 (13%)                           |
| Yorkshire and The Humber   | 1,825,820 (9%)                      | --                                | 5,480,800 (10%)                           |
| East Midlands              | 1,623,157 (8%)                      | --                                | 4,880,200 (9%)                            |
| West Midlands              | 1,942,370 (10%)                     | --                                | 5,950,800 (11%)                           |
| East of England            | 2,101,467 (10%)                     | --                                | 6,334,500 (11%)                           |
| London                     | 2,914,578 (14%)                     | --                                | 8,799,800 (16%)                           |
| South East                 | 3,125,838 (15%)                     | --                                | 9,278,100 (16%)                           |
| South West                 | 1,834,854 (9%)                      | --                                | 5,701,200 (10%)                           |
| Unknown                    | 1,487,746 (7%)                      | --                                | --                                        |

Note: coronavirus.data.gov.uk no longer publishes case counts by age, sex or region at the day level. It was not possible to limit to the study period of August 1, 2020 – January 31, 2022, and therefore the results

ANDERSEN ET AL (2023)  
PERSONS DIAGNOSED WITH COVID IN ENGLAND IN THE CPRD: A COHORT DESCRIPTION

above reflect the figures as accessed on January 31, 2023 of the total number of cases since the start of the pandemic.



ANDERSEN ET AL (2023)

PERSONS DIAGNOSED WITH COVID IN ENGLAND IN THE CPRD: A COHORT DESCRIPTION

**Supplemental file 1, Table 8: Regional Distribution of CPRD COVID cohorts, CPRD Practices, COVID Cases and Population of England**

| Region                   | CPRD Aurum                               |                                       |                         | England                          |                             |
|--------------------------|------------------------------------------|---------------------------------------|-------------------------|----------------------------------|-----------------------------|
|                          | Primary Care COVID Cases (n = 2,257,907) | Hospitalized COVID Cases (n = 13,165) | All CPRD Aurum Patients | All COVID Cases (n = 20,386,786) | Population (n = 56,489,800) |
| North East               | 4%                                       | 4%                                    | 5%                      | 5%                               | 5%                          |
| North West               | 21%                                      | 22%                                   | 17%                     | 13%                              | 13%                         |
| Yorkshire and The Humber | 3%                                       | 3%                                    | 4%                      | 9%                               | 10%                         |
| East Midlands            | 2%                                       | 2%                                    | 3%                      | 8%                               | 9%                          |
| West Midlands            | 17%                                      | 16%                                   | 18%                     | 10%                              | 11%                         |
| East of England          | 4%                                       | 3%                                    | 5%                      | 10%                              | 11%                         |
| London                   | 19%                                      | 23%                                   | 16%                     | 14%                              | 16%                         |
| South East               | 20%                                      | 20%                                   | 20%                     | 15%                              | 16%                         |
| South West               | 10%                                      | 8%                                    | 14%                     | 9%                               | 10%                         |
| Unknown                  | < 1%                                     | 0                                     |                         | 7%                               | --                          |

All CPRD Aurum patients refers figures published in “Data resource profile: Clinical Practice Research Datalink (CPRD) Aurum” by Wolf et al (International Journal of Epidemiology 2019). We were unable to find more recent distributions by ONS region of all CPRD Aurum patients.

For all COVID cases, coronavirus.data.gov.uk no longer publishes case counts by region at the day level. It was not possible to limit to the study period of August 1, 2020 – January 31, 2022, and therefore the results above reflect the figures as accessed on January 31, 2023 of the total number of cases since the start of the pandemic.

For the population of England, we used ONS 2021 Census figures.

ANDERSEN ET AL (2023)

PERSONS DIAGNOSED WITH COVID IN ENGLAND IN THE CPRD: A COHORT DESCRIPTION

**Supplemental file 1, Table 9: Characteristics of Primary Care COVID Cases in CPRD Aurum, by High Risk Definitions**

|                                      | All (n =<br>2,257,907) | Meeting NHS<br>Highest Risk<br>Conditions<br>(n = 249,972) | Meeting<br>PANORAMIC<br>Criteria<br>(n = 691,593) | Meeting<br>UKHSA<br>Clinical Risk<br>(n = 225,051) |
|--------------------------------------|------------------------|------------------------------------------------------------|---------------------------------------------------|----------------------------------------------------|
| Cases meeting definition             | --                     | 11%                                                        | 31%                                               | 10%                                                |
| Age, mean (SD)                       | 34 (19)                | 53 (18)                                                    | 55 (15)                                           | 49 (21)                                            |
| Sex                                  |                        |                                                            |                                                   |                                                    |
| Male                                 | 1,046,275 (46%)        | 37%                                                        | 45%                                               | 42%                                                |
| Female                               | 1,211,592 (54%)        | 63%                                                        | 55%                                               | 58%                                                |
| Unknown                              | 40 (< 1%)              | < 1%                                                       | < 1%                                              | < 1%                                               |
| General Practitioner Practice Region |                        |                                                            |                                                   |                                                    |
| North East                           | 83,834 (4%)            | 12,776 (5%)                                                | 29,115 (4%)                                       | 9,678 (4%)                                         |
| North West                           | 471,195 (21%)          | 60,632 (23%)                                               | 157,317 (23%)                                     | 53,930 (24%)                                       |
| Yorkshire and The<br>Humber          | 71,429 (3%)            | 8,563 (3%)                                                 | 23,079 (3%)                                       | 7,532 (3%)                                         |
| East Midlands                        | 49,651 (2%)            | 5,472 (2%)                                                 | 14,001 (2%)                                       | 4,678 (2%)                                         |
| West Midlands                        | 377,125 (17%)          | 43,550 (17%)                                               | 118,027 (17%)                                     | 38,817 (17%)                                       |
| East of England                      | 95,139 (4%)            | 10,394 (4%)                                                | 28,546 (4%)                                       | 7,824 (3%)                                         |
| London                               | 424,908 (19%)          | 45,690 (18%)                                               | 118,663 (17%)                                     | 40,268 (18%)                                       |
| South East                           | 448,536 (20%)          | 45,430 (17%)                                               | 130,283 (19%)                                     | 38,808 (17%)                                       |
| South West                           | 235,785 (10%)          | 27,437 (11%)                                               | 72,473 (10%)                                      | 23,480 (10%)                                       |
| Unknown                              | 305 (< 1%)             | 28 (< 1%)                                                  | 89 (< 1%)                                         | 36 (< 1%)                                          |
| Non-immunocompromised                | 2,193,241<br>(100%)    | 218,912<br>(100%)                                          | 648,474<br>(100%)                                 | 196,621<br>(100%)                                  |
| Unvaccinated                         | 1,170,509 (53%)        | 82,484 (38%)                                               | 236,106 (36%)                                     | 96,498 (49%)                                       |
| 1 COVID vaccine dose                 | 173,853 (8%)           | 9,527 (4%)                                                 | 28,711 (5%)                                       | 12,469 (6%)                                        |
| 2 COVID vaccine doses                | 598,367 (27%)          | 73,907 (34%)                                               | 234,570 (36%)                                     | 54,869 (28%)                                       |
| First booster                        | 250,512 (12%)          | 52,994 (24%)                                               | 149,087 (23%)                                     | 32,785 (17%)                                       |
| Immunocompromised                    | 64,666<br>(100%)       | 41,060<br>(100%)                                           | 43,119<br>(100%)                                  | 28,430<br>(100%)                                   |
| Unvaccinated                         | 1,306 (2%)             | 832 (2%)                                                   | 791 (2%)                                          | 675 (2%)                                           |
| 1 COVID vaccine dose                 | 6,033 (9%)             | 3,556 (9%)                                                 | 3,105 (7%)                                        | 2,661 (9%)                                         |
| 2 COVID vaccine doses                | 33,953 (53%)           | 20,928 (51%)                                               | 21,636 (50%)                                      | 14,416 (51%)                                       |
| 3 COVID vaccine doses                | 23,108 (36%)           | 15,544 (38%)                                               | 17,388 (40%)                                      | 10,542 (37%)                                       |
| First booster                        | 266 (< 1%)             | 200 (< 1%)                                                 | 199 (< 1%)                                        | 136 (< 1%)                                         |

SD: standard deviation. Where necessary, to fulfill CPRD suppression rules of cells with 10 or fewer persons, categories are presented as percentages to prevent back-calculation.

ANDERSEN ET AL (2023)

PERSONS DIAGNOSED WITH COVID IN ENGLAND IN THE CPRD: A COHORT DESCRIPTION

**Supplemental file 1, Table 10: Characteristics of Hospitalized COVID Cases in CPRD Aurum-HES Linked Data, by High Risk Definitions**

|                                       | All<br>(n = 13,165) | Meeting NHS<br>Highest Risk<br>Conditions<br>(n = 4,333) | Meeting<br>PANORAMIC<br>Criteria<br>(n = 11,011) | Meeting<br>UKHSA<br>Clinical Risk<br>(n = 5,353) |
|---------------------------------------|---------------------|----------------------------------------------------------|--------------------------------------------------|--------------------------------------------------|
| Hospitalized cases meeting definition | --                  | 33%                                                      | 84%                                              | 41%                                              |
| Age, mean (SD)                        | 60 (16)             | 66 (14)                                                  | 65 (14)                                          | 66 (16)                                          |
| Sex                                   |                     |                                                          |                                                  |                                                  |
| Male                                  | 7,537 (57%)         | 2,242 (52%)                                              | 6,280 (57%)                                      | 2,804 (52%)                                      |
| Female                                | 5,628 (43%)         | 2,091 (48%)                                              | 4,731 (43%)                                      | 2,549 (48%)                                      |
| Unknown                               | 0                   | 0                                                        | 0                                                | 0                                                |
| General Practitioner Practice Region  |                     |                                                          |                                                  |                                                  |
| North East                            | 467 (4%)            | 172 (4%)                                                 | 397 (4%)                                         | 200 (4%)                                         |
| North West                            | 2,886 (22%)         | 962 (22%)                                                | 2,510 (23%)                                      | 1,263 (24%)                                      |
| Yorkshire and The Humber              | 340 (3%)            | 126 (3%)                                                 | 282 (3%)                                         | 156 (3%)                                         |
| East Midlands                         | 214 (2%)            | 73 (2%)                                                  | 182 (2%)                                         | 97 (2%)                                          |
| West Midlands                         | 2,065 (16%)         | 708 (16%)                                                | 1,739 (16%)                                      | 891 (17%)                                        |
| East of England                       | 414 (3%)            | 147 (3%)                                                 | 358 (3%)                                         | 175 (3%)                                         |
| London                                | 2,984 (23%)         | 943 (22%)                                                | 2,387 (22%)                                      | 1,105 (21%)                                      |
| South East                            | 2,682 (20%)         | 832 (19%)                                                | 2,235 (20%)                                      | 1,022 (19%)                                      |
| South West                            | 1,113 (8%)          | 370 (9%)                                                 | 921 (8%)                                         | 444 (8%)                                         |
| Unknown                               | 0                   | 0                                                        | 0                                                | 0                                                |
| Non-immunocompromised                 | 12,984              | 4,179                                                    | 10,832                                           | 5,208                                            |
| Unvaccinated                          | 12,744 (98%)        | 4,107 (98%)                                              | 10,602 (98%)                                     | 5,070 (97%)                                      |
| 1 COVID vaccine dose                  | 240 (2%)            | 72 (2%)                                                  | 230 (2%)                                         | 138 (3%)                                         |
| 2 COVID vaccine doses                 | 0                   | 0                                                        | 0                                                | 0                                                |
| First booster                         | 0                   | 0                                                        | 0                                                | 0                                                |
| Immunocompromised                     | 181                 | 154                                                      | 179                                              | 145                                              |
| Unvaccinated                          | 102 (56%)           | 89 (58%)                                                 | 100 (56%)                                        | 79 (54%)                                         |
| 1 COVID vaccine dose                  | 79 (44%)            | 65 (42%)                                                 | 79 (44%)                                         | 66 (46%)                                         |
| 2 COVID vaccine doses                 | 0                   | 0                                                        | 0                                                | 0                                                |
| 3 COVID vaccine doses                 | 0                   | 0                                                        | 0                                                | 0                                                |
| First booster                         | 0                   | 0                                                        | 0                                                | 0                                                |

SD: standard deviation.
